# Supplementary material
Source: PubMed Central journal article supplement (PMC4466007)
Supplement: NIHMS670893-supplement-01.pdf [file NIHMS670893-supplement-01.pdf]

## **MITF Modulates Therapeutic Resistance through EGFR Signaling**

Zhenyu Ji<sup>1</sup>, Yiyin Erin Chen<sup>1</sup>, Raj Kumar<sup>1</sup>, Michael Taylor<sup>1</sup>, Ching-Ni Jenny Njauw<sup>1</sup>, Benchun Miao<sup>1</sup>,  
Dennie T. Frederick<sup>2</sup>, Jennifer A. Wargo<sup>4</sup>, Keith T. Flaherty<sup>2</sup>, Göran Jönsson<sup>3</sup>, Hensin Tsao<sup>1,2\*</sup>

<sup>1</sup> Wellman Center for Photomedicine/Department of Dermatology

<sup>2</sup> MGH Cancer Center

Massachusetts General Hospital

Boston, MA 02114

<sup>3</sup> Department of Clinical Sciences Lund, Division of Oncology and Pathology,

Lund University

Lund, Sweden

<sup>4</sup> Surgical Oncology and Genomic Medicine, The University of Texas MD Anderson Cancer Center,

Houston, Texas

\* Correspondence to: Hensin Tsao, Massachusetts General Hospital and Harvard Medical School,  
Wellman Center for Photomedicine, Edwards 211, 55 Fruit Street, Boston, MA 02114-2696. Phone:  
617-726-9569; Fax: 617-724-2745; E-mail: [htsao@mgh.harvard.edu](mailto:htsao@mgh.harvard.edu)

**Short Title:** MITF and Resistance

**ABSTRACT**

Response to targeted therapies varies significantly despite shared oncogenic mutations. Nowhere is this more apparent than in BRAF(V600E)-mutated melanomas where initial drug response can be striking and yet relapse is commonplace. Resistance to BRAF inhibitors have been attributed to the activation of various receptor tyrosine kinases (RTKs) though the underlying mechanisms have been largely uncharacterized. Here, we found that EGFR induced vemurafenib resistance is ligand dependent. We then employed whole-genome expression analysis and discovered that vemurafenib resistance correlated with the loss of MITF, along with its melanocyte lineage program, and with the activation of EGFR signaling. An inverse relationship between MITF, vemurafenib resistance and EGFR was then observed in patient samples of recurrent melanoma and was conserved across melanoma cell lines and patients' tumor specimens. Functional studies revealed that MITF depletion activated EGFR signaling and consequently recapitulated the resistance phenotype. In contrast, forced expression of MITF in melanoma and colon cancer cells inhibited EGFR and conferred sensitivity to BRAF/MEK inhibitors. These findings indicate that an "autocrine drug resistance loop" is suppressed by melanocyte lineage signal(s), such as MITF. This resistance loop modulates drug response and could explain the unique sensitivity of melanomas to BRAF inhibition.

## INTRODUCTION

Primary and secondary resistance to molecular therapies remains a cardinal challenge in the clinical setting. For metastatic melanoma, the pace of progress from the benchside discovery of BRAF(V600E) to the bedside delivery of vemurafenib (VEM) has been rapid. As with other targeted agents, however, acquired resistance to selective BRAF inhibitors (SBI) soon followed on the heels of clinical success. COT expression(Johannessen *et al.*, 2010), SOX10 reduction(Sun *et al.*, 2014), BRAF amplification(Shi *et al.*, 2012), splice variation(Poulikakos *et al.*, 2011), NRAS mutagenesis and receptor tyrosine kinase (RTK) activation(Girotti *et al.*, 2013; Nazarian *et al.*, 2010; Villanueva *et al.*, 2010; Yadav *et al.*, 2012), have all been linked to SBI resistance in melanoma. Although these mechanisms all confer a similar phenotype of mediating cell survival and proliferation, the relative contribution of subclonal selection versus epigenetic reprogramming of cell state to the emergence of each mechanism is not known. On the other hand, the lineage dependency of SBI sensitivity suggests that cellular differentiation state might underlie any of the previously described mechanisms of resistance to SBI.

We thus set out to characterize changes in transcriptional programming that occur during the course of in vitro selection for VEM resistance. Using a forward pharmacogenetic screen, we discovered that VEM resistance was associated with different degrees of cellular reprogramming. On the one hand, resistance that emerges from a BRAF splice product is associated with minimal changes in cell state. On the other hand, resistance can also be associated with significant transcriptome changes anchored by the concomitant loss of the master melanocyte lineage regulator, MITF, with the activation of EGFR, a pathway little utilized in these neural crest-derived cells. We show that modulating MITF levels alters VEM sensitivity in both melanoma and colon cancer, and that a reciprocal relationship between MITF and EGFR is conserved across melanoma specimens and correlates with VEM response. Our studies point to lineage identity as a major determining factor for SBI sensitivity.

## RESULTS

In order to elucidate programmatic changes that occur with VEM resistance, we subjected two melanoma cell lines, A375 and SKmel-28, to escalating doses of VEM in order to generate isogenically-matched pairs of sensitive and resistant cell lines. Dose interrogation showed that both resistant cell lines (i.e. A375R and SKmel-28R) exhibited >10-fold increase in their VEM GI<sub>50</sub>'s (Fig 1a) compared to their parental counterparts. Both resistant lines showed increased pAKT<sup>473</sup> and re-engagement of MAPK signaling although the A375R cells retained sensitivity to MEK inhibition while SKmel-28R developed cross-resistance (Fig 1a, 1b). We subsequently subjected all 4 sets of cell lines in triplicate to comparative gene expression analysis.

Profiling of the A375 versus A375R pair revealed strikingly sparse gene expression changes associated with the gain of VEM resistance (Fig S1). Of the 12,466 species surveyed, only 0.37% and 0.52% showed >2-fold induction and suppression, respectively, with maximum changes ranging from a 5.8-fold induction of *MAGEA1* to a 6.7-fold suppression of *SERPINA3* (Table S1). Gene Ontology (GO) and KEGG categories impacted by these minor expression variations (Fig 1c) included “proliferation” (GO) and “inflammation” and “ECM” (KEGG). Since the A375R cells retained sensitivity to MEK inhibitors (Fig 1a,b), we hypothesized that the resistance lesion was upstream of MEK. Exome sequencing (Table S2) did not detect any acquired mutations in *NRAS*, *HRAS*, *KRAS*, *MAP2K1*, *MAP2K2*, *CRAF* or *BRAF*, although there was a *BRAF*(Δ2-8) splice variant that was present in the A375R but not the A375 parent line (Fig 1e). This specific alteration has been reported in a VEM-resistant human tumor specimen (pt #5 from a recent report(Poulikakos *et al.*, 2011)) and therefore is likely driving VEM resistance in A375R cells.

In contrast to the A375 pair, expression analysis of SKmel-28 versus SKmel-28R revealed significant programmatic changes with the emergence of VEM resistance (Fig S1). Overall, 3.4% and 3.0% of the genes exhibited a >2-fold increase or decrease, respectively, with a dynamic range of 114-fold induction (*IL1B*) and 57-fold suppression (*LOC728715*, Table S1). GO analysis indicated major shifts in “development/cell migration” genes while KEGG categorization yielded numerous enrichments

including “cancer”, “cytokine” and “metabolic processes” (Fig 1d). The SKmel-28R cells lacked putative BRAF splice variants (Fig 1e) and differed from the A375R cells in demonstrating co-resistance to both VEM and MEK inhibition (Fig 1a,b). Comparative phosphotyrosine (pY) RTK blot analysis of the SKmel-28 and SKmel-28R pair uncovered sustained EGFR signaling on SKmel-28R cells (Fig 1f), which has been reported to cause VEM resistance (Corcoran *et al.*, 2012; Girotti *et al.*, 2013). There’s no dramatic alteration of phospho-EGFR in A375R (Fig S1C). Additional exome sequencing of SKmel-28 and SKmel-28R did not reveal biologically plausible acquired variants in *EGFR*, *NRAS*, *HRAS*, *KRAS*, *MAP2K1*, *MAP2K2*, *CRAF* or *BRAF* (Table S2). Taken together, these results suggest that direct target modification, such as the BRAF splice product in A375R cells, neutralizes drug effects by resetting a specific signaling pathway but leaves few programmatic footprints. In contrast, EGFR activation in SKmel-28R cells appears to be associated with more profound gene expression alterations. We thus set out to clarify the mechanism by which EGFR may have become activated in the SKmel-28R cells.

Since growth factors and cytokines are well known activators of RTK signaling, we first interrogated these genes in the microarray and found that a surprising number was upregulated during the gain-of-resistance in SKmel-28. Among candidate ligand-RTK pairings, *HB-EGF-EGFR* and *GAS6-AXL* levels were all increased (Fig S2) though only EGFR appeared to be activated in the phosphotyrosine (pY) RTK blot analysis (Fig 1f). qPCR of Skmel-28R cells confirmed a 39-fold increase in *EGFR* and a 3.5-fold induction of *HB-EGF* compared to VEM sensitive Skmel-28 cells (Fig 1g). Thus, an EGFR auto-stimulatory circuit appears to be selectively sustained and mediating resistance in the SKmel-28R cells.

To experimentally validate the EGFR findings, we generated stable SKmel-28 lines expressing wild-type EGFR, oncogenic EGFR(L858R), or kinase-dead EGFR(D837A) (Fig 2a). In the absence of EGFR ligand, there was only a minimal gain in VEM resistance in EGFR overexpression lines, with the gains in VEM  $GI_{50}$ 's for SKmel-28<sup>EGFR(WT)</sup>, SKmel-28<sup>EGFR(D837A)</sup> and SKmel-28<sup>EGFR(L858R)</sup> cells all less than 3-fold compared to SKmel-28<sup>VECTOR</sup> ( $GI_{50}$  = 0.75  $\mu$ M). However, upon the addition of EGF or HB-EGF, VEM resistance was dramatically enhanced in wild-type EGFR overexpression lines (Fig 2a). There

was a 36-fold and a 12-fold increase in VEM GI<sub>50</sub>'s when EGF or HB-EGF, respectively, were exogenously added. As expected, the kinase-inactive EGFR(D837A) allele had minimal effects on VEM resistance even in the presence of EGF or HB-EGF. Since both *AXL* and *GAS6* were also upregulated in SKmel-28R compared to SKmel-28 cells in the microarray data, we also transduced *AXL* into SKmel-28 cells. However, we observed only minimal effects on VEM sensitivity either in the absence or presence of exogenous *GAS6* (Fig S3). These results indicate that overexpression of *EGFR* alone may not be sufficient to induce resistance and that ligand upregulation is a critical component of an “autocrine resistance loop.”

To elucidate determinants of this resistance loop, we next performed transcriptional factor analysis on differentially-expressed genes in SKmel-28R versus SKmel-28 cells (Table S3). As shown in Fig 2b, MITF suppression was the leading transcriptional footprint with a Z-score of -5.391 ( $p=6.37 \times 10^{-39}$ ); there was also inhibition of SOX10 activity (Z-score, -2.153,  $p=2.59 \times 10^{-5}$ ). These findings are consonant with the categorical change of “development/cell migration” genes, as recovered by GO classification of the microarray data. Validation of the microarray analysis by qPCR and western blotting confirmed dramatic reductions in *MITF* and *MITF-M* along with several downstream MITF targets: *BCL2*, *EDNRB*, and *miR-211* (Fig 2c). Overall, the acquisition of VEM resistance in SKmel-28 cells appears to have silenced the entire melanocytic program as positive upstream MITF regulators (*LEF1*, *PAX3* and *SOX10*) were all diminished while the negative MITF regulator *TCF4* was increased by 420-fold (Fig 2c).

To determine if MITF loss cooperates with EGFR activation in mediating resistance, we depleted MITF in the stable EGFR SKmel-28 lines (Fig 2d) using siRNA and observed the acquisition of strong resistance against both VEM (45-fold increase in GI<sub>50</sub>) and AZD6244 (300-fold increase in GI<sub>50</sub>) in the SKmel-28<sup>EGFR(WT)</sup> cells even in the absence of EGFR ligand (Fig 2d). siMITF had no acute effects on the amount of EGFR and EGF but did immediately increase the levels of HB-EGF (3.6-fold) and TGF $\alpha$  (7.2-fold), both of which are known ligands for EGFR (Fig 2e). In addition, neuregulin 1, (*NRG1*), an indirect activator of EGFR through ERBB4 or ERBB3 binding, was also increased 5.1-fold after MITF

knockdown (data not shown). These findings indicate that MITF suppression may create an autocrine ligand-rich environment which synergizes with EGFR upregulation to mediate resistance.

In order to independently replicate the MITF/EGFR observation, we generated additional pairs of VEM sensitive and resistant melanoma cell lines and found that the emergence of VEM resistance in another line, MGH-CH1, was also correlated with MITF loss and EGFR activation (Fig S4a,b). Using the aforementioned strategy, we stably introduced EGFR(WT), EGFR(L858R) and EGFR(D837A) alleles into MGH-CH1 cells and assessed VEM sensitivity. As shown in Fig S4c, both MGH-CH1<sup>EGFR(WT)</sup> and MGH-CH1<sup>EGFR(L858R)</sup> cells exhibited ligand-dependent VEM resistance compared to MGH-CH1<sup>vector</sup> and MGH-CH1<sup>EGFR(D837A)</sup> cells, which was consistent with the SKmel-28 results. Next, suppression of MITF in MGH-CH1<sup>EGFR(L858R)</sup> cells also led to a gain of resistance to both VEM and AZD6244 in the absence of ligand (Fig S4d). In contrast to SKmel-28 cells, however, the EGFR(L858R) allele seemed to play a stronger role than wildtype EGFR in the MGH-CH1 cells.

We next sought broader evidence of an interaction between levels of *MITF*, *EGFR* and therapeutic sensitivity. First, we examined the Cancer Cell Line Encyclopedia (CCLE) database (Barretina *et al.*, 2012) and found significant correlations (Fig 3a) between PLX4720 resistance and low *MITF* ( $p=0.001$ ), high *EGFR* ( $p=0.0001$ ), low *LEF1* ( $p=0.025$ ) and high *TCF4* ( $p=0.011$ ); PLX4720 insensitivity was marginally related to low *SOX10* ( $p=0.078$ ) but not to *PAX3* ( $p=0.76$ ). In addition, copy number analysis using a set of BRAF(V600E) melanoma lines (Ji *et al.*, 2012) revealed that MITF amplification is associated with increased sensitivity to both VEM and the MEK inhibitor U0126 (Fig S5), further strengthening MITF's role in melanoma's response to MAPK pathway inhibition. Thus, the pattern of lineage silencing, high *EGFR*, and SBI insensitivity appears to be preserved across a panel of melanoma lines. We next set out to confirm the relationship between acquired VEM resistance and MITF levels in tumor specimens. We first examined changes in MITF expression using a publicly available microarray data set (Gene Expression Omnibus (GEO) GSE50509) which captured gene expression data for 20 pre-treatment and 30 relapse melanoma specimens from 20 patients. As shown in Fig 3b, the majority of relapsed tumors showed evidence of MITF loss. Since *EGFR* probes in

GSE50509 did not pass our quality filter, we also verified trends in *MITF* and *EGFR* expression by qPCR using an in-house collection of BRAF(V600E)-mutated tumors from patients treated with BRAF±MEK inhibitors. The average relative log<sub>2</sub>-fold change between pre- and post-relapse specimens was -0.88 for *MITF* and 0.61 for *EGFR* (Fig 3c; p=0.002). In 4/5 tumor pairs, the relapse specimen had lower *MITF* levels but higher *EGFR* levels compared to the pre-treatment samples.

The overall expression patterns that relate both MITF and EGFR to VEM response also suggest that the two molecules may exhibit innate reciprocity. First, a significant negative correlation between MITF and EGFR was identified in the 28 CCLE melanoma lines (Fig 4a; p<0.0001). Turning to melanoma specimens rather than cell lines, significant reciprocal relationships were also observed in the 374 tumors (p<0.0001) available through The Cancer Genome Atlas (TCGA; Fig 4b, Table S4) and 31 primary melanomas (p=0.0005) and 71 metastatic melanoma specimens (p=0.0007) available in the GEO (GSE46517; Fig 4b, Table S4). Implicit in these findings is the possibility that MITF may directly counter-regulate EGFR signaling. To test this hypothesis, we induced MITF expression short-term in A375 and MGH-CH1 cells using the Tet-on system (Fig 4c). In the A375 cells, there was a modest reduction in EGFR but a complete abrogation of pEGFR. In the MGH-CH1 cells, there was a dramatic loss of EGFR though basal levels of pEGFR were undetectable. Interestingly, with the acute elevation of MITF levels, there appeared to be a dose-dependent growth retardation in both cell lines (Fig S6).

In order to directly assess the drug sensitizing effects of MITF, we used a set of immortalized primary melanocyte lines (Pmel; Fig 5a) which have stably incorporated BRAF(V600E) alone (Pmel-BRAF\*) or both BRAF(V600E) and MITF (Pmel-BRAF\*-MITF) together (Garraway *et al.*, 2005). These cells were selected because they harbor the minimal essential elements for defining drug response. As shown in Fig 4a, the native Pmel line had low MITF expression and no BRAF(V600E) as assessed by the VE-1 antibody. EGFR was clearly expressed in both the Pmel and Pmel-BRAF\* cells. On the other hand, Pmel-BRAF\*-MITF cells had near abolition of EGFR expression. The Pmel-BRAF\*-MITF cells were also significantly more sensitive to the selective BRAF inhibitor PLX4720 and MEK inhibitor U0126 (Fig 5b) compared to both Pmel and Pmel-BRAF\* cells suggesting that the addition of MITF



conferred enhanced drug sensitivity even in cells with extant BRAF(V600E). We next determined if MITF can have a similar impact on drug response in non-pigment cells by using a Tet-on MITF system that was engineered into the BRAF(V600E)-mutated HT29 colon cancer line. Forced expression of MITF reduced the levels of pEGFR (Fig 5c) and engendered a >10-fold increase in sensitivity (as measured by GI<sub>50</sub>'s) to both VEM and AZD6244 (Fig 5d). These results support a role for MITF in regulating EGFR and in modulating drug response for both pigment cells and non-pigment cells.

## DISCUSSION

Acquired therapeutic resistance in melanoma has been ascribed to various mechanisms. However, the relationship between these acquired lesions and underlying transcriptional programs are not well defined. Our studies suggest that a balance between lineage identity and RTK activation modulates drug sensitivity. More specifically, loss of MITF potentiates an EGFR “autocrine resistance loop” that is not normally utilized by the melanocyte lineage, which then mediates therapeutic resistance.

Our analysis of the CCLE data (Barretina *et al.*, 2012), and those of others (Konieczkowski *et al.*, 2014), supports the notion that melanomas with weak lineage identity (low MITF, LEF1 and SOX10) appear to be more resistant to PLX. This hypothesis would harmonize with the rapid ability of colorectal cancers to utilize a lineage-appropriate expression of EGFR to undermine the effects of SBIs in tumors with BRAF mutations (Corcoran *et al.*, 2012; Prahallad *et al.*, 2012). Thus, cells with nominal MITF may predominate during the course of selection. Alternatively, MITF may directly, or indirectly, suppress the EGFR signaling system (Fig 5e) as suggested by our experiments modulating MITF in immortalized melanocytes, melanoma and colon cancer cells. The use of Pmel cells with stable and genetically-defined elements (i.e. BRAF(V600E) and MITF) provides perhaps the most precise and direct evidence that MITF-enriched cells adopt a low-EGFR state that is more drug sensitive. With forced MITF expression in A375 and MGH-CH1 melanomas and HT29 colon cancer cells, there was a direct reduction of EGFR and/or pEGFR.

We also observed an increase in pEGFR with siMITF depletion but only when cells were stably endowed with ectopic EGFR. Both SKmel-28 and MGH-CH1 lines express robust levels of MITF but exquisitely low levels of EGFR. The prevalence of this phenotype across the melanoma population may explain the markedly higher response rate to SBIs compared to BRAF mutant colorectal cancer. The cooperativity between MITF depletion and overexpression of EGFR and its ligands suggests that MITF loss may contribute to resistance by augmenting levels of ligands, such as HB-EGF and TGF- $\alpha$ , neuregulin 1 or IL-8, which has reported to be negatively regulated by MITF (Hari Kishore *et al.*, 2012) and which is known to transactivate EGFR (Itoh *et al.*, 2005). Interestingly, a recent report shows that

IL8 signaling can induce chemo-resistance by maintaining melanoma initiating cells(Wilson *et al.*, 2014). Lastly, low MITF and high EGFR (and perhaps AXL(Konieczkowski *et al.*, 2014)) could mark exclusive cellular states that harbor distinct therapeutic susceptibilities unrelated to the direct function of these proteins. This static view is supported by the innate reciprocity between MITF and EGFR expression which is preserved across multiple collections of melanoma tumors for which expression data are available (Fig 4a, b). However, the precise mechanism(s) by which MITF interacts with the EGFR signaling system remains the subject of ongoing investigation.

Although there is burgeoning appreciation for a link between melanocyte lineage identity and RTK signaling, there have been several reports examining the role of MITF in dictating drug response. On the one hand, Smith *et al.* found that when A375 cells were induced into resistance against MEK inhibition, emergent subclones exhibited higher MITF and SMURF2 levels(Smith *et al.*, 2013). Along these lines, Johannessen *et al.* used A375 cells in a reverse screen and found that genes in the cAMP pathway induced MITF, strengthened lineage identity and conferred resistance to RAF, MEK and ERK inhibitors(Johannessen *et al.*, 2013); it is worth noting, however, that one of the patient tumors reported in the paper clearly showed loss of MITF with relapse (#16; extended data Fig 10d ref(Johannessen *et al.*, 2013)). On the other hand, Konieczkowski *et al.* found that intrinsic PLX resistance is associated with low MITF along with high NF- $\kappa$ B levels(Konieczkowski *et al.*, 2014). In a related study, Sun *et al.* also showed that depletion of lineage gene SOX10, but not MITF, increased EGFR and VEM resistance(Sun *et al.*, 2014). In that report, sh(MITF) did not alter VEM sensitivity though it may be related to the cell line used; in our hands, SKmel-28 cells have 11-fold more MITF than A375 cells (data not shown) and thus the A375 cells may have come to depend on SOX10 signaling to a greater extent. Instead of inducing resistance by SOX10 loss only, our study indicates that MITF loss only confers resistance in the presence of EGFR expression.

Our data indicates that RTK induced resistance is dependent on ligand, which broadens the picture of growth factors in drug resistance, which was initially suggested in paracrine HGF induced primary BRAFi resistance(Straussman *et al.*, 2012; Wilson *et al.*, 2012). Our data is also consonant with a

recent report that high EGFR expressing cells often lack EGFR activation, presumably due to lack of ligands, and are still sensitive to BRAFi; thus, EGFR levels alone cannot be used as a biomarker of vemurafenib resistance (Gross *et al.*, 2014). Our results also suggest that ligand measurement in blood or other body fluid might be an eventual method to predict drug resistance clinically. It is intriguing that stable EGFR phosphorylation by constitutively active L858R mutant does not induce resistance, insight from which might offer a more detailed understanding of EGFR-dependent resistance and strategies to overcome resistance.

In summary, lineage reprogramming appears to be directly coupled to RTK activation in the setting of therapeutic resistance. These comparative molecular studies provide a framework for understanding shifts in transcriptional states as resistance lesions emerge under drug selection. Efforts are now underway to recover useful therapeutic agendas to overcome these programs.

## **MATERIALS AND METHODS**

### **Compounds, antibodies and reagents**

Vemurafenib, PLX4720, AZD6244 and U0126 were from Selleck Chemicals (Houston, TX). EGF, HB-EGF and p-RTK arrays were purchased from R&D (Minneapolis, MN). Doxycycline was from Clontech (Mountain View, CA). Antibodies against p-EGFR, EGFR, BRAF, p-MEK, MEK, p-ERK, ERK, p-AKT, AKT, GAPDH and  $\alpha$ -tubulin were from Cell Signaling (Danvers, MA). CellTiter-Glo cell viability assay was from Promega (Madison, WI). AlamarBlue cell viability reagent was from Life Technologies (Grand Island, NY). Human phospho-RTK array kit was from R&D systems (Minneapolis, MN). siRNA against MITF and non-targeting control siRNA were from GE Dharmacon (Lafayette, CO).

### **Long-term cell proliferation assays**

Cells were seeded into 6-well plates ( $1 \times 10^4$  cells per well) and cultured both in the absence and presence of drugs as indicated. 10-15 days later, cells were fixed with paraformaldehyde and stained with 1% crystal violet for 10min. The plates were then washed with ddH<sub>2</sub>O and dried in air before photographed.

### **Drug treatment and cell viability assay**

Cell viability was determined by AlamarBlue (Life Technologies) fluorescence assay and CellTiter-Glo (Promega) luminescence assay. Approximately 12 hours before drug treatment, cells were seeded at a density of 3,000 cells (100  $\mu$ L) per well in a 96-well plate. The plates were incubated with drugs for 48 hours. Ten microliters of AlamarBlue was added to each well and incubated for 3 hours at 37°C.

AlamarBlue is fluorescent substrates reduced by mitochondrial enzyme activity in viable cells.

Alternatively, 30  $\mu$ L of CellTiter-Glo was added to each well and incubated, protected from light on an orbital shaker, for 10 minutes. CellTiter-Glo contains luciferase, which catalyzes the oxygenation of luciferin (creating light) according to the amount of ATP present. Fluorescence or luminescence intensity was determined using a Molecular Devices plate reader with an excitation filter centered on 540 nm and an emission filter centered on 590 nm or with an integration time of 500 milliseconds and measuring total light emitted, respectively. GI<sub>50</sub>'s were calculated using the software CompuSyn (<http://www.combosyn.com>).

### **Stable infections**

Lentiviral transduction was used to alter the levels of MITF. Lentiviral supernatant was produced by transient transfection of HEK293T cells (ATCC) using lipofectamine (Life Technologies, Inc.), according to the manufacturer's instructions. The viral-containing supernatants were harvested 48 hours after transfection and filtered through a 0.45  $\mu$ m filter unit. To transduce melanoma cells with lentivirus, logarithmically growing melanoma cells were seeded at a density of  $2 \times 10^5$  cells per well in 6-well plates. A total of 0.5 mL of lentivirus suspension and 8  $\mu$ g/mL of polybrene were added to DMEM with 10% FBS in a total volume of 1 mL. Cells were incubated at 37°C for 12 hours before removing the medium and replacing with 2 mL of fresh DMEM for expansion of the transductants. Cells were selected with puromycin at 1.5  $\mu$ mol/L for another 5 days before further experiments.

### **Protein lysate preparation and immunoblots**

Cells were seeded in medium containing 10% fetal bovine serum (FBS) for 24 h, and then washed with PBS and lysed with RIPA buffer supplemented with Halt protease inhibitor cocktail (Pierce). Equal amounts of protein (5–20 µg) were loaded onto 4%–20% SDS polyacrylamide mini-gels (Bio-Rad), transferred to polyvinylidene difluoride membranes. After being blocked in 5% milk in TBS-Tween for 1 hour, blots were incubated with primary antibodies overnight, followed by horseradish peroxidase-conjugated secondary antibody (1:5,000) for 45 minutes. Antigen–antibody complexes were detected by enhanced chemiluminescence. Human p-RTK arrays were performed according to the manufacturer's instructions.

### **Melanoma patient tumor samples**

Human melanoma specimens (all BRAF V600 mutated) were obtained from patients undergoing treatment with vemurafenib, dabrafenib or trametinib in accordance with a protocol approved by the MGH Institutional Review Board (IRB). All patients provided written informed consent for analysis, as approved by the Dana-Farber/Harvard Cancer Center Institutional Review Board (DF/HCC Protocol 11-181).

### **RNA isolation and RT–PCR**

RNA isolation from cell lines harvested with TRIzol reagent (Invitrogen) according to the manufacturer's instruction. cDNA synthesis was performed with Maxima Universal First Strand cDNA Synthesis Kit (#K1661, Thermo scientific) according to manufacturer's instruction. cDNA was obtained by reverse transcription using High-Capacity cDNA Reverse Transcription kit (Applied Biosystems, AB) according to the manufacturer's instructions. Levels of individual genes were quantified using a TaqMan Gene Expression Assays (Life Technologies) as previously described (Yang *et al.*, 2006): EGFR (Hs01076078\_m1), EGF (Hs01099999\_m1), HB-EGF (Hs00181813\_m1), MITF (Hs01117294\_m1),

TCF4( Hs00162613\_m1), MIR211 (Hs04231471\_s1), TGFA (Hs00608187\_m1), SOX10( Hs00366918\_m1), BCL2( Hs00608023\_m1), PAX3(Hs00240950\_m1), LEF1( Hs01548150\_m1), CREB1(Hs00231713\_m1), NRG1( Hs00247620\_m1). Human GUSB ( # 4333767T, Life Technologies) was used as an endogenous control. Primer sequences for MITF-M were from Dynek et al(Dynek *et al.*, 2008Dynek *et al.*, 2008). Real time PCR was performed using the LightCycler480 (Roche), 95°C 10 min for denature and then 95°C x 10sec, 60°C to 62°C x 50sec for 45 cycles. The normalized, relative levels of the genes between samples were expressed as the log<sub>2</sub> ratio (e.g., -10 = 2<sup>-10</sup> = 1,024-fold reduction in expression in sample 1 vs sample 2).

### **Conflict of Interest**

None

### **Acknowledgements**

This work was supported in part by the National Institutes of Health (K24 CA149202, P01CA163222, 5T32CA071345, 5T32AR007098), the American Skin Association and the generous donors to the MGH Millennium Melanoma Fund. The work was further supported by the Swedish Cancer Society, Swedish Research Council, Berta Kamprad Foundation, Gunnar Nilsson Cancer Foundation and Gustav Vth Jubilee Foundation.

**REFERENCES:**

- Barretina J, Caponigro G, Stransky N, *et al.* (2012) The Cancer Cell Line Encyclopedia enables predictive modelling of anticancer drug sensitivity. *Nature* 483:603-7.
- Corcoran RB, Ebi H, Turke AB, *et al.* (2012) EGFR-mediated re-activation of MAPK signaling contributes to insensitivity of BRAF mutant colorectal cancers to RAF inhibition with vemurafenib. *Cancer Discov* 2:227-35.
- Dynek JN, Chan SM, Liu J, *et al.* (2008) Microphthalmia-associated transcription factor is a critical transcriptional regulator of melanoma inhibitor of apoptosis in melanomas. *Cancer Res* 68:3124-32.
- Furumura M, Potterf SB, Toyofuku K, *et al.* (2001) Involvement of ITF2 in the transcriptional regulation of melanogenic genes. *J Biol Chem* 276:28147-54.
- Garraway LA, Widlund HR, Rubin MA, *et al.* (2005) Integrative genomic analyses identify MITF as a lineage survival oncogene amplified in malignant melanoma. *Nature* 436:117-22.
- Girotti MR, Pedersen M, Sanchez-Laorden B, *et al.* (2013) Inhibiting EGF receptor or SRC family kinase signaling overcomes BRAF inhibitor resistance in melanoma. *Cancer Discov* 3:158-67.
- Gross A, Niemetz-Rahn A, Nonnenmacher A, *et al.* (2014) Expression and activity of EGFR in human cutaneous melanoma cell lines and influence of vemurafenib on the EGFR pathway. *Targeted oncology*.
- Hari Kishore A, Li XH, Word RA (2012) Hypoxia and PGE(2) regulate MiTF-CX during cervical ripening. *Molecular endocrinology* 26:2031-45.
- Itoh Y, Joh T, Tanida S, *et al.* (2005) IL-8 promotes cell proliferation and migration through metalloproteinase-cleavage proHB-EGF in human colon carcinoma cells. *Cytokine* 29:275-82.
- Ji Z, Njauw CN, Taylor M, *et al.* (2012) p53 rescue through HDM2 antagonism suppresses melanoma growth and potentiates MEK inhibition. *J Invest Dermatol* 132:356-64.
- Johannessen CM, Boehm JS, Kim SY, *et al.* (2010) COT drives resistance to RAF inhibition through MAP kinase pathway reactivation. *Nature* 468:968-72.
- Johannessen CM, Johnson LA, Piccioni F, *et al.* (2013) A melanocyte lineage program confers resistance to MAP kinase pathway inhibition. *Nature* 504:138-42.
- Konieczkowski DJ, Johannessen CM, Abudayyeh O, *et al.* (2014) A Melanoma Cell State Distinction Influences Sensitivity to MAPK Pathway Inhibitors. *Cancer Discov*.
- Nazarian R, Shi H, Wang Q, *et al.* (2010) Melanomas acquire resistance to B-RAF(V600E) inhibition by RTK or N-RAS upregulation. *Nature* 468:973-7.
- Poulikakos PI, Persaud Y, Janakiraman M, *et al.* (2011) RAF inhibitor resistance is mediated by dimerization of aberrantly spliced BRAF(V600E). *Nature* 480:387-90.
- Prahallad A, Sun C, Huang S, *et al.* (2012) Unresponsiveness of colon cancer to BRAF(V600E) inhibition through feedback activation of EGFR. *Nature* 483:100-3.



- Shi H, Moriceau G, Kong X, *et al.* (2012) Melanoma whole-exome sequencing identifies (V600E)B-RAF amplification-mediated acquired B-RAF inhibitor resistance. *Nature communications* 3:724.
- Smith MP, Ferguson J, Arozarena I, *et al.* (2013) Effect of SMURF2 targeting on susceptibility to MEK inhibitors in melanoma. *J Natl Cancer Inst* 105:33-46.
- Straussman R, Morikawa T, Shee K, *et al.* (2012) Tumour micro-environment elicits innate resistance to RAF inhibitors through HGF secretion. *Nature* 487:500-4.
- Sun C, Wang L, Huang S, *et al.* (2014) Reversible and adaptive resistance to BRAF(V600E) inhibition in melanoma. *Nature* 508:118-22.
- Villanueva J, Vultur A, Lee JT, *et al.* (2010) Acquired resistance to BRAF inhibitors mediated by a RAF kinase switch in melanoma can be overcome by cotargeting MEK and IGF-1R/PI3K. *Cancer Cell* 18:683-95.
- Wilson BJ, Saab KR, Ma J, *et al.* (2014) ABCB5 maintains melanoma-initiating cells through a proinflammatory cytokine signaling circuit. *Cancer Res* 74:4196-207.
- Wilson TR, Fridlyand J, Yan Y, *et al.* (2012) Widespread potential for growth-factor-driven resistance to anticancer kinase inhibitors. *Nature* 487:505-9.
- Yadav V, Zhang X, Liu J, *et al.* (2012) Reactivation of mitogen-activated protein kinase (MAPK) pathway by FGF receptor 3 (FGFR3)/Ras mediates resistance to vemurafenib in human B-RAF V600E mutant melanoma. *J Biol Chem* 287:28087-98.
- Yang G, Zhang G, Pittelkow MR, *et al.* (2006) Expression profiling of UVB response in melanocytes identifies a set of p53-target genes. *J Invest Dermatol* 126:2490-506.

## FIGURE LEGENDS

**Figure 1. Characteristics of vemurafenib resistant lines.** (a). A375R and SKmel-28R cells (closed squares) showed >10-fold increase in VEM GI<sub>50</sub> compared to their parent cell lines (open circles). SKmel-28R, but not A375R, are also cross-resistant to MEK inhibitor U0126 (5 μM). (b). Kinase signaling responses to DMSO control (labeled D), U0126 (U; 5 μM) and VEM (V; 5 μM) in A375, A375R, SKmel-28 and SKmel-28R lines. Gene Ontology (GO) and KEGG analyses for differentially expressed genes between the A375 and A375R pair (c) and between the SKmel-28 and SKmel-28R pair (d). (e). A375R cells harbor a BRAFΔ2-8 splice variant, which is not present in either the native A375 cells or the SKmel-28/SKmel-28R pair. (f). Phosphotyrosine (pY)-RTK blot analysis shows increased pY-EGFR in the SKmel-28R cells compared to the SKmel-28 cells while qPCR analysis (g) reveals upregulation of *HB-EGF* and *EGFR*, but not *EGF*, in the SKmel-28R line.

**Figure 2. Loss of MITF contributes to an EGFR autocrine resistance loop in SKmel-28R cells.**

(a). Stable expression in SKmel-28 cells of EGFR(WT) or EGFR(L858R), but not kinase-dead EGFR(D837A), leads to VEM resistance in the presence of exogenously added EGF (10 ng/mL) or HB-EGF (10 ng/mL), but not in the absence of ligand. Expression of EGFR alone does not significantly increase VEM resistance. (b). Using the Ingenuity software, transcription factor analysis of genes differentially expressed between SKmel-28 and SKmel-28R indicate a strong suppression of MITF target genes. Western blotting confirms the loss of MITF protein in SKmel-28R cells (inset). (c) qPCR shows loss of MITF expression in SKmel-28R cells along with that of other melanocytic lineage regulators (*SOX10*, *PAX3*, *LEF1*) and various MITF targets (*MITF-M*, *Mir211*, *ENDRB*, *BCL2*). Levels of *TCF4* (*ITF2*), which is known to suppress MITF (Furumura *et al.*, 2001), is greatly elevated. (d). siRNA-mediated depletion of MITF (denoted siMITF) in stable SKmel-28<sup>EGFR(WT)</sup> and SKmel-28<sup>EGFR(L858R)</sup> cells leads to enhanced VEM and AZD6244 resistance even in the absence of EGFR ligand. (e). RNA levels of *HB-EGF* and *TGFα*, two known ligands of EGFR, are increased in SKmel-28 cells where MITF

has been depleted by siRNA. Thus, loss of MITF closes the “autocrine resistance loop” in the face of higher EGFR expression. Numbers above columns represent actual  $GI_{50}$  values.

**Figure 3. Expression of the melanocyte lineage program and EGFR correlates with VEM**

**sensitivity.** (a). PLX4720 sensitivity (i.e. increased PLX activity area) is positively correlated with higher *MITF*, *LEF1* and *SOX10* levels and negatively associated with higher *EGFR* and *TCF4* levels. (b). Data from GSE50509 showing MITF levels in pre-treatment (white columns) and post-relapse (gray columns) specimens. Results are shown as  $\log_2$  ratios normalized to the mean intensity of pre-treatment samples. (c). Relative (post-relapse to pre-treatment) and normalized (to GUSB) levels of *MITF* and *EGFR* in clinical specimens from patients on BRAF/MEK inhibitor trials. RNA levels were determined by qPCR. There is a significant trend towards decreased MITF expression and increased EGFR expression in the post-relapse samples compared to pre-treatment samples.

**Figure 4. Reciprocity between MITF and EGFR in melanoma.** (a). An inverse relationship between levels of *MITF* and *EGFR* can be observed across 28 CCLE melanoma samples and (b) 374 melanoma tumor specimens in the TCGA and 31 primary melanoma tumors and 71 metastatic melanoma specimens from GSE46517. Linear regression indicated within dot plot; of note, the TCGA data are plotted in log-log scale and thus the linear regression line appears downwardly curved. (c). Induction of MITF in A375 and MGH-CH1 cells using a Tet-on promoter leads to a complete suppression of pEGFR and a slight decrease in EGFR in the A375 cells and a significant decrease in EGFR in the MGH-CH1 cells.

**Figure 5. Overexpression of MITF confers therapeutic sensitivity.** (a). Immortalized primary melanocytes (Pmel) with stable expression of BRAF(V600E) and MITF (Pmel-BRAF\*-MITF) have lower EGFR levels than either control Pmel cells or Pmel cells with only BRAF(V600E) (Pmel-BRAF\*). (b). Pmel-BRAF\*-MITF (solid triangle) cells are more sensitive to both PLX and U0126 than Pmel (open

circle) and Pmel-BRAF\* (solid squares) cells. (c). The colon cancer cell line HT29, which harbors a BRAF(V600E) mutation, was transduced with a Tet-on vector (TetGFP) or Tet-on MITF (TetGFP-MITF) and induced to express MITF using the indicated doses of doxycycline. (d). Induced expression of MITF in HT29 leads to increased sensitivity to vemurafenib and AZD6244, as determined by a >10-fold reduction in the GI<sub>50</sub>. (e). One possible model suggests that MITF, or other lineage determinants, may influence therapeutic resistance by modulating levels of ligand (e.g. HB-EGF), RTKs (such as EGFR) or other downstream components of RTK signaling.

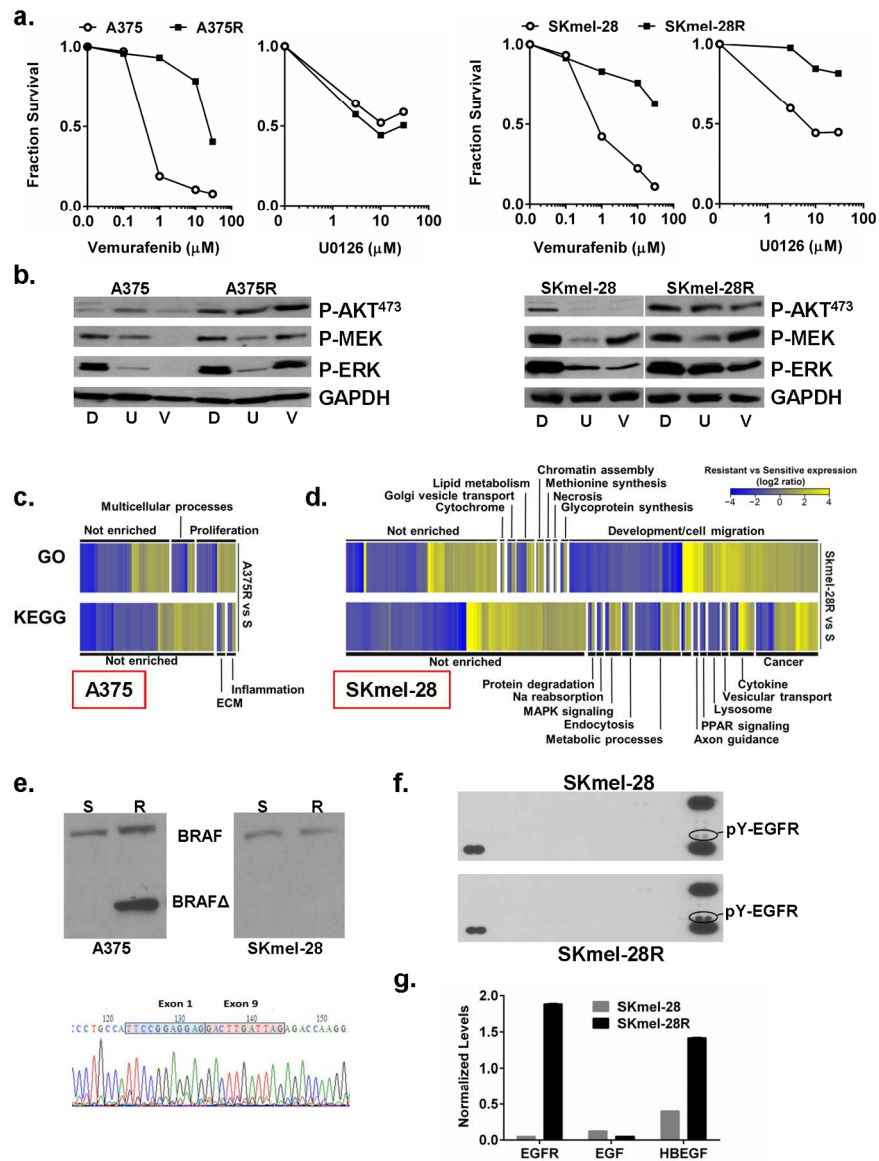

190x254mm (220 x 220 DPI)

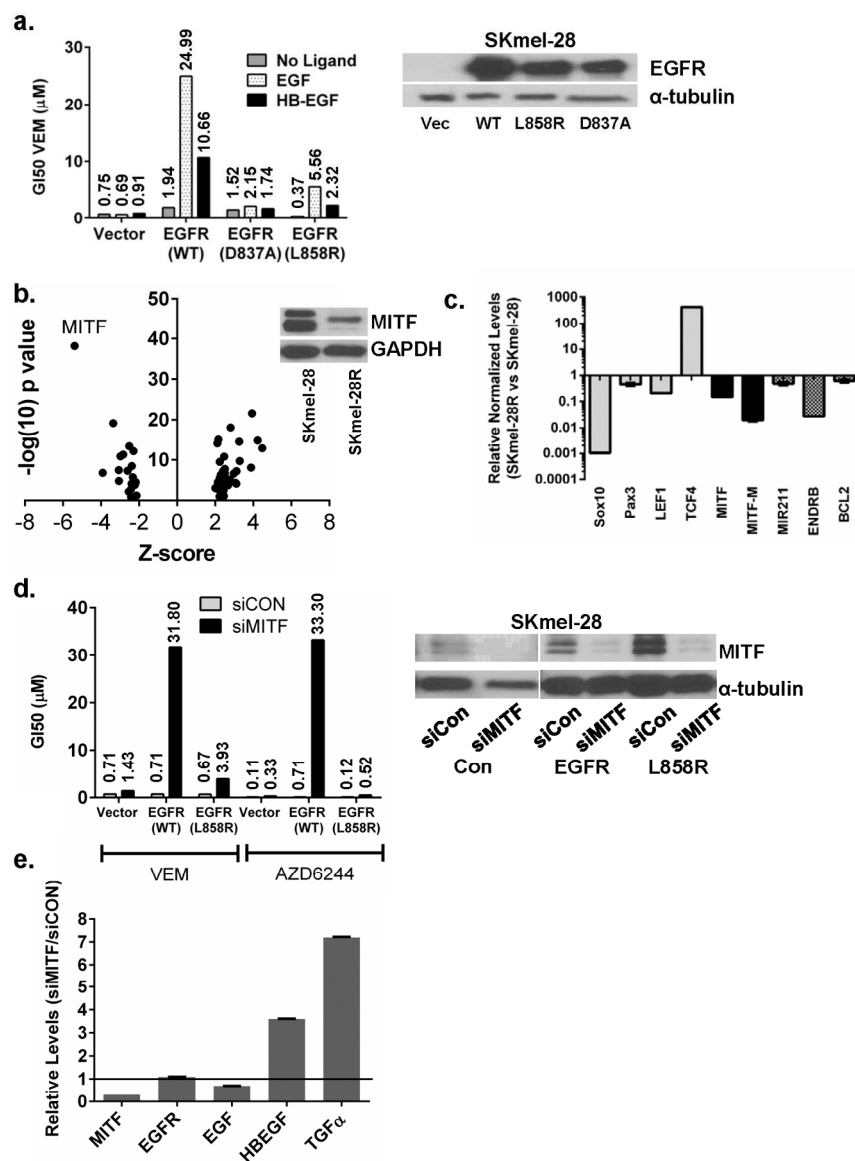

190x254mm (220 x 220 DPI)

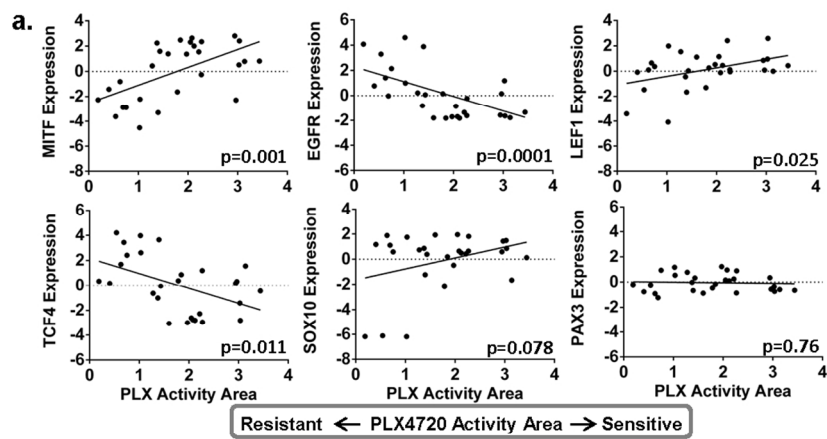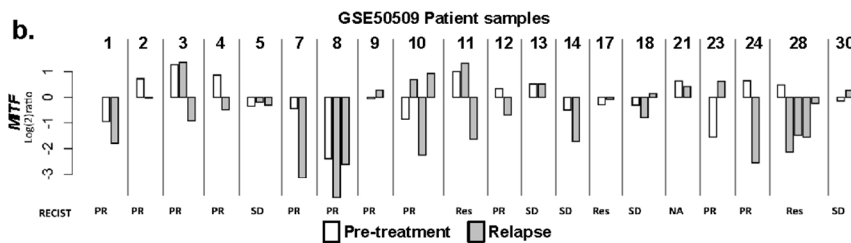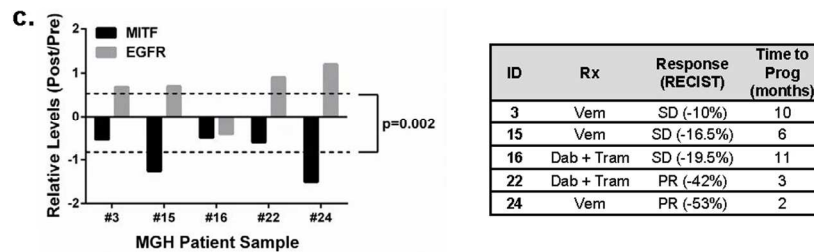

190x254mm (150 x 150 DPI)

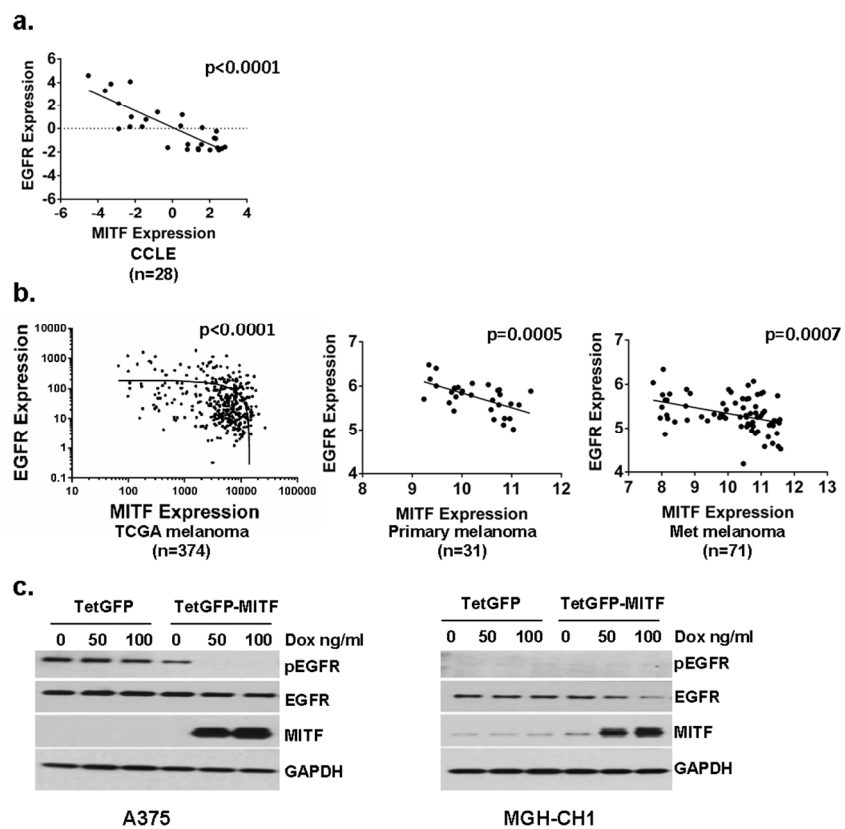

190x254mm (150 x 150 DPI)



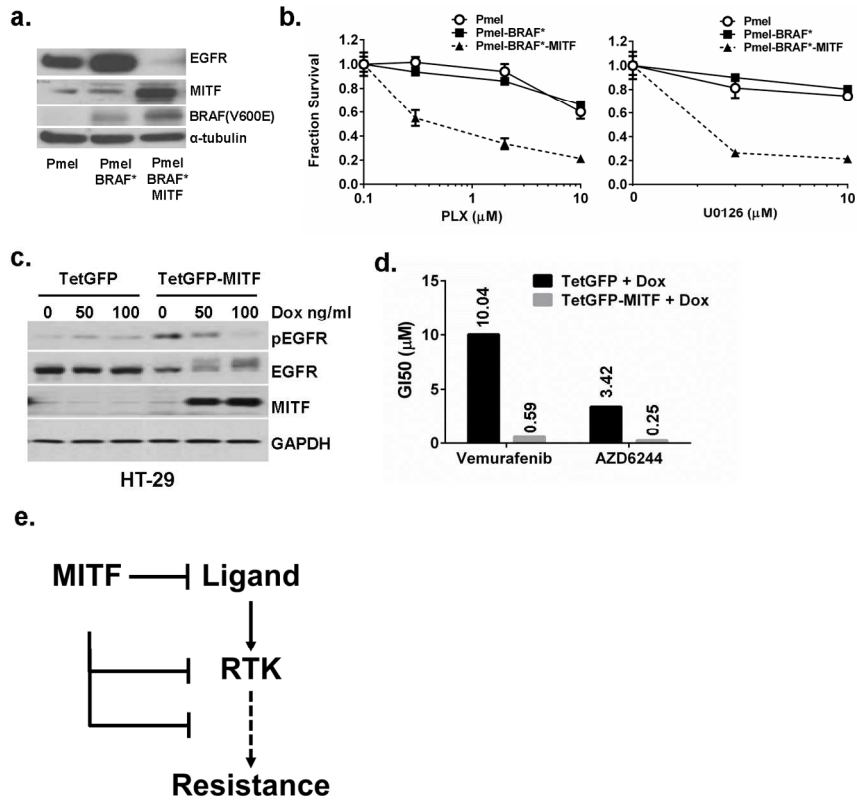

**SUPPLEMENTARY MATERIALS:**

Materials and Methods

Figures S1-S6

Tables S1-S4

**Materials and Methods:****Cell lines**

Melanoma cell lines have been previously published (Ji *et al.*, 2013; Ji *et al.*, 2012; Tsao *et al.*, 2004) and were validated against public datasets (<http://www.sanger.ac.uk/genetics/CGP/cosmic/>) by sequence and/or comparative genomic hybridization information when available. Immortalized melanocytes Pmel and their transformed counterparts, Pmel-BRAF\* and Pmel-BRAF\*-MITF cell lines (Garraway *et al.*, 2005) were provided by Hans R. Widlund from Brigham and Women's Hospital, Boston, MA. Other melanoma lines were obtained from the American Type Culture Collection (ATCC). Lines were cultured in Dulbecco's modified Eagle medium (DMEM) supplemented with 10% FBS in humidified atmosphere of 5% CO<sub>2</sub>/95% air at 37°C. The acquired vemurafenib resistant lines: A375R, SKmel-28R, MGH-CH1R line were generated using escalating doses of vemurafenib (doses from 0.5~10µM) of sensitive human melanoma lines A375, SKmel-28, MGH-CH1.

**Plasmids**

The following plasmids were purchased from Addgene (Cambridge, MA): EGFR WT, EGFR L858R, EGFR G719S, EGFR D837A, pBabepuro. Tet-on inducible expression plasmid pTRE3G-ZsGreen1 was from Clontech (Mountain View, CA). Human M type MITF isoform RNA was extracted from melanoma cells and cloned to pTRE3G-ZsGreen1 according to manufacturer's manual. The authenticity of cloned gene was verified by Sanger sequencing.

## Microarray analysis

Cell lines were profiled in triplicate. RNA was isolated from sensitive and resistant melanoma lines A375, A375R, SKmel-28 and SKmel-28R, labeled and hybridized to Illumina HT12 v4 arrays according to the manufacturer's protocol. Data were normalized using the cubic spline method and mean centered across all analyzed samples. Subsequently, features present in at least 50% of samples were included in additional analyses (Table S1). Original files can be found in the GEO database (GEO XXXX). Normalized data from GSE50509 were downloaded from gene expression omnibus (<http://www.ncbi.nlm.nih.gov/geo/>). Data were then filtered based on detection p-value  $<0.01$  and features present in at least 50% of samples were included in downstream analysis. Data were mean centered,  $\log_2$  transformed and, for individual genes, the probe with the most variation across samples was used. Notably, we mean centered only based on pre-treated samples since centering across samples with similar origin might skew the results.

After normalization, all microarray analyses were done using R (<http://www.R-project.org/>). For Figure S1, the R package Limma (Smyth GK, Michaud J, Scott HS. Use of within-array replicate spots for assessing differential expression in microarray experiments. *Bioinformatics* 2005;21:2067-75) was used to generate lists of genes that differ in expression between sensitive and resistant cell lines (A375 vs A375R, SKmel-28 vs SKmel-28R). The R package GeneAnswers (Gang Feng PD, Tian Xia, Warren Kibbe, Simon Lin. GeneAnswers: Integrated Interpretation of Genes. R package version 1.16.02012) was then used to elicit which Gene Ontology (GO) and Kyoto Encyclopedia of Genes and Genomes (KEGG) categories were enriched among these genes. All heatmaps were generated with the R package gplots (Gregory R. Warnes BB, Lodewijk Bonebakker, Robert, Gentleman WHAL, Thomas Lumley, Martin, Maechler AM, Steffen Moeller, Marc Schwartz and Bill, Venables. gplots: Various R programming tools for plotting data. R package version 2.11.0. <http://CRAN.R-project.org/package=gplots>).

To analyze which transcription factors were most affected by the resistance mechanism of SKmel-28R, we took the log ratios of the microarray data for SKmel-28R versus SKmel-28 cells growing in DMSO at 48 hours. This array of log ratios was uploaded to IPA (Ingenuity® Systems, [www.ingenuity.com](http://www.ingenuity.com)), which then generated a list of transcription factors that were significantly upregulated ("activated") or downregulated ("inhibited") in SKmel-28R compared to SKmel-28 cells.

### **CACLE Analysis**

CACLE data was downloaded from

<http://www.nature.com/nature/journal/v483/n7391/full/nature11003.html>. As described by Barretina et al., the PLX activity area was used to indicate PLX sensitivity, such that higher PLX activity area correlated to increasing PLX sensitivity for any particular cell line. Correlation was performed using the GraphPrism 6.0 software.

### **Gene Expression Database**

Expression data for pre-treatment and progression samples from GSE50509 and for primary and metastatic melanomas from GSE46517 were downloaded from the GEO website (<http://www.ncbi.nlm.nih.gov/geo/query/acc.cgi?acc=GSE46517>). RMA normalized files were processed by Nexus Expression™ v.3 (BioDiscovery, Inc). EGFR and MITF levels shown in Figure 3 were manually culled from the probe list. Correlation was performed using the GraphPrism 6.0 software.

### **RNA sequence expression data**

mRNA expression (RNA Seq V2 RSEM) from 374 tumors were obtained for EGFR and MITF through the cBioPortal site (<http://www.cbioportal.org/public-portal/index.do>). Correlation was performed using the GraphPrism 6.0 software.

### **Copy Number data**

Melanoma lines that were subjected to VEM and U0126 have been described (Ji *et al.*, 2013; Ji *et al.*, 2012). SNP-CGH was performed using the Affymetrix 500K GeneChip through the established procedures of the Harvard-Partners Center for Genetics and Genomics (HPCGG). Cel files were processed and analyzed using the Nexus 7.5 software (BioDiscovery, Inc; Hawthorne, CA) per company protocol.

## Legends for Figures S1-S6

### Fig. S1.

Differences in log(2) expression levels of genes in A375 and A375R (a) and SKmel-28 and SKmel-28R (b). (c). p-EGFR expression in A375 and A375R cells.

### Fig. S2

Relative levels (SKmel-28R vs. SKmel-28) of growth-factor related genes in samples 1-3.

### Fig. S3

Overexpression of AXL with or without GAS6 does not significantly increase resistance to VEM.

### Fig. S4

Functional analysis of resistance in MGH-CH1 cell line. (a). VEM inhibition curves for MGH-CH1/MGH-CH1R. (b) phosphotyrosine-RTK blot shows increased pY-EGFR and decreased MITF in MGH-CH1 resistant (MGH-CH1R) cells compared to native MGH-CH1 cells. (c). Addition of EGF and HBEGF increases VEM resistance in MGH-CH1<sup>EGFR(WT)</sup> and MGH-CH1<sup>EGFR(L858R)</sup> lines. (d). Depletion of MITF in MGH-CH1<sup>EGFR(L858R)</sup> cells leads to enhanced resistance to both VEM and AZD6244.

### Fig. S5

MITF amplification is associated with increased VEM and U0126 sensitivity.

### Fig. S6

Induction of MITF leads to proliferative arrest. A375 and MGH-CH1 cells were transduced with (a) TetGFP-vector or (b) TetGFP-MITF. (c) Addition of doxycycline shows increase in GFP fluorescence in

both TetGFP-vector and TetGFP-MITF. (c,d). Increasing doxycycline leads to proliferative arrest only in the TetGFP-MITF cells (d) but not the TetGFP-vector controls (c).

## **Legends for Tables S1-S4**

### **Table S1.**

RNA expression profiles of A375, SKmel-28 cells and their resistant counterparts.

### **Table S2.**

Exome sequencing data for major MAPK signaling genes in A375, SKmel-28 cells and their resistant counterparts.

### **Table S3.**

Ingenuity Transcription Factor analysis to identify alterations in acquired resistant melanoma cells.

### **Table S4.**

Data retrieved from TCGA and GSE46517 for EGFR and MITF analysis.



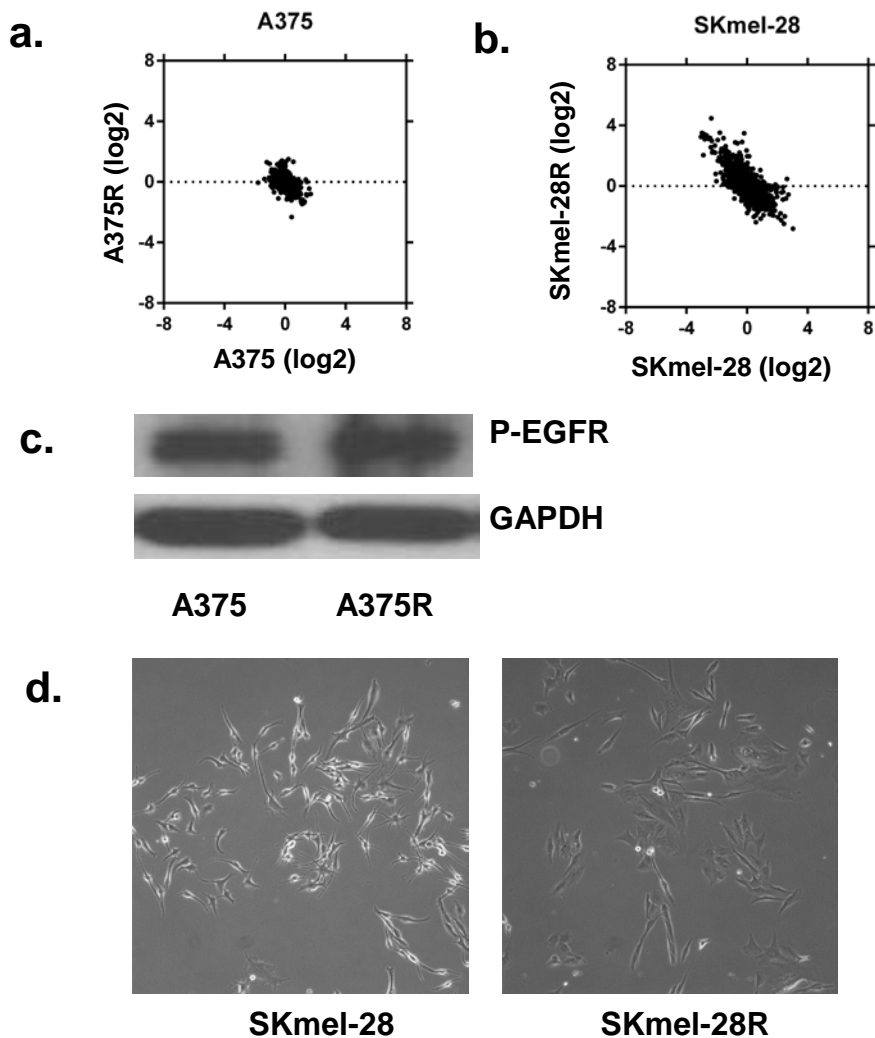

**Fig S1.** Differences in  $\log_2$  expression levels of genes in A375 and A375R (A) and SKmel-28 and SKmel-28R (B). (C) . p-EGFR expression in A375 and A375R cells. (D). Morphology of Skmel-28 and Skmel-28R. The pictures were taken with light microscope (10X). VEM sensitive SKmel-28 melanoma cells were more bipolar and stellate in appearance c/w pigment cells while VEM resistant SKmel-28R cells were more polygonal and epithelioid in appearance.

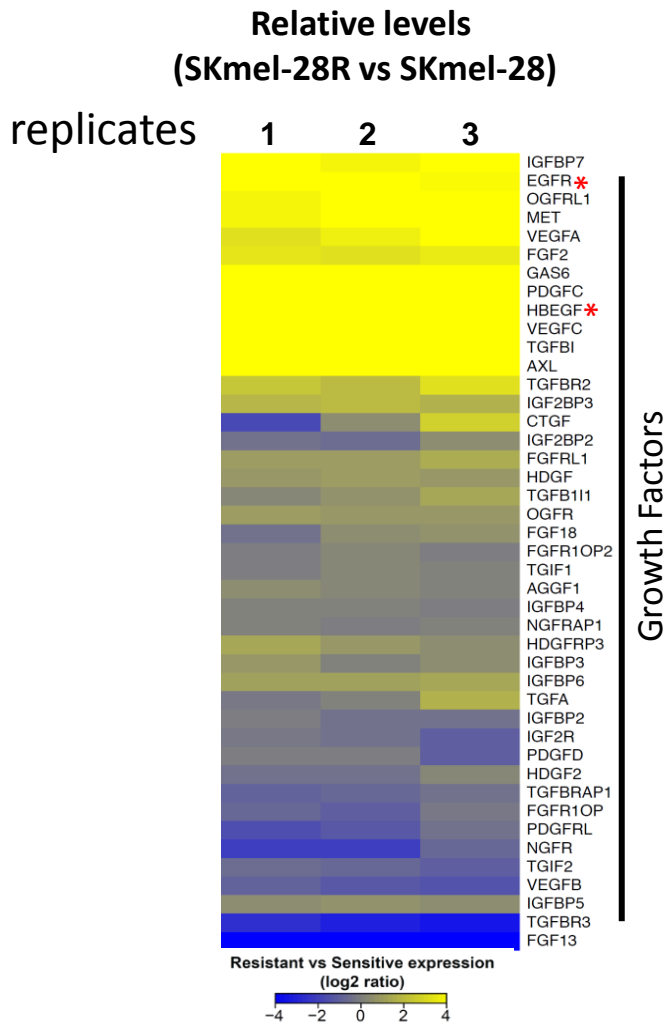

**Fig S2.** Relative levels (SKmel-28R vs. SKmel-28) of growth-factor related genes in samples 1-3.

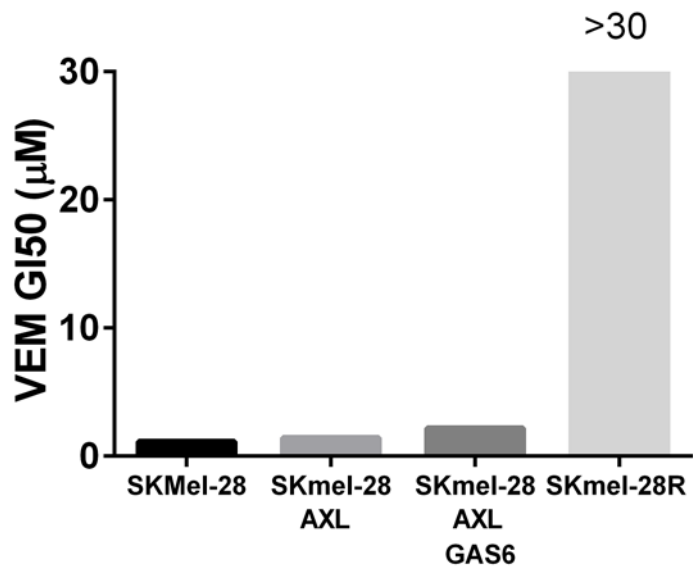

**Fig S3.** Overexpression of AXL with or without GAS6 does not significantly increase resistance to VEM.

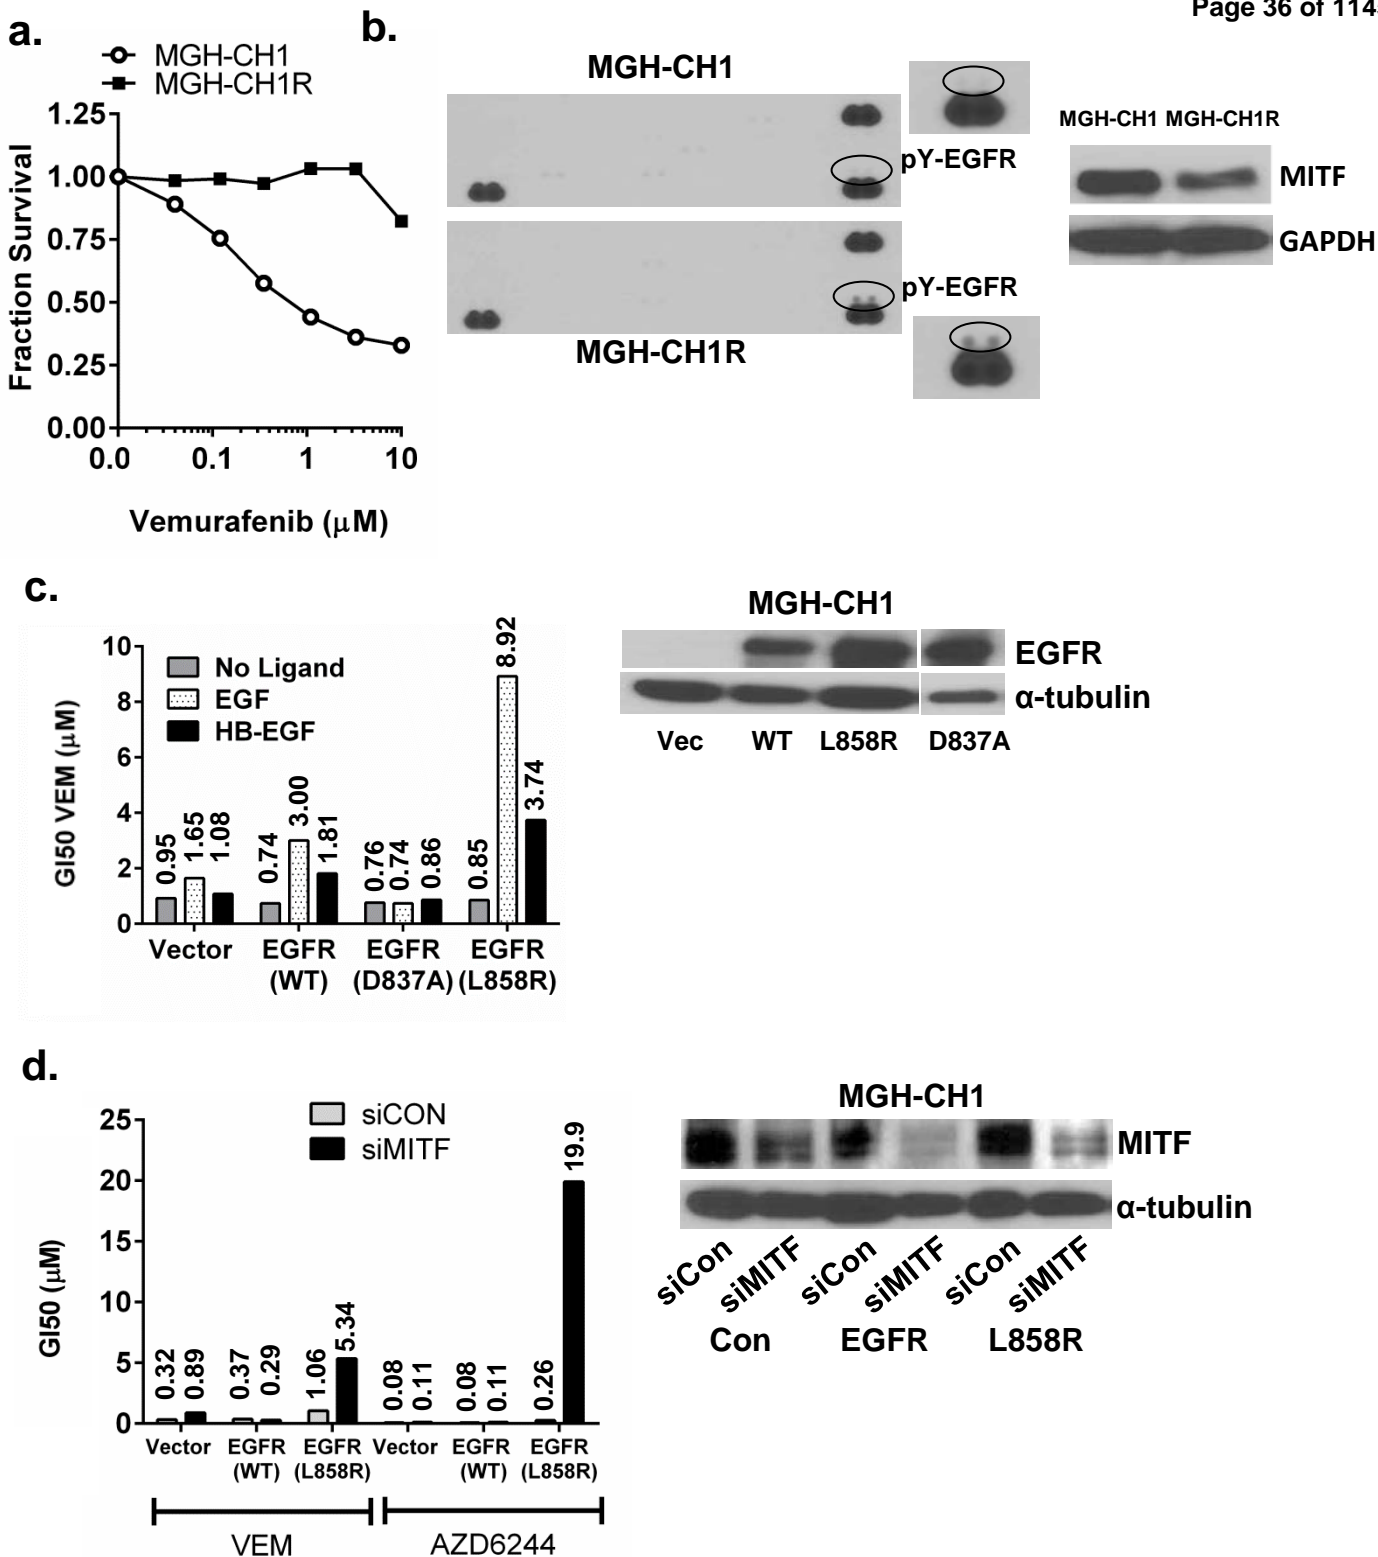

**Fig S4. Functional analysis of resistance in MGH-CH1 cell line.** (A). VEM inhibition curves for MGH-CH1/MGH-CH1R (B) phosphotyrosine-RTK blot shows increased pY-EGFR and decreased MITF in MGH-CH1 resistant (MGH-CH1R) cells compared to native MGH-CH1 cells. (C). Addition of EGF and HBEGF increases VEM resistance in MGH-CH1<sup>EGFR(WT)</sup> and MGH-CH1<sup>EGFR(L858R)</sup> lines. (D). Depletion of MITF in MGH-CH1<sup>EGFR(L858R)</sup> cells leads to enhanced resistance to both VEM and AZD6244.

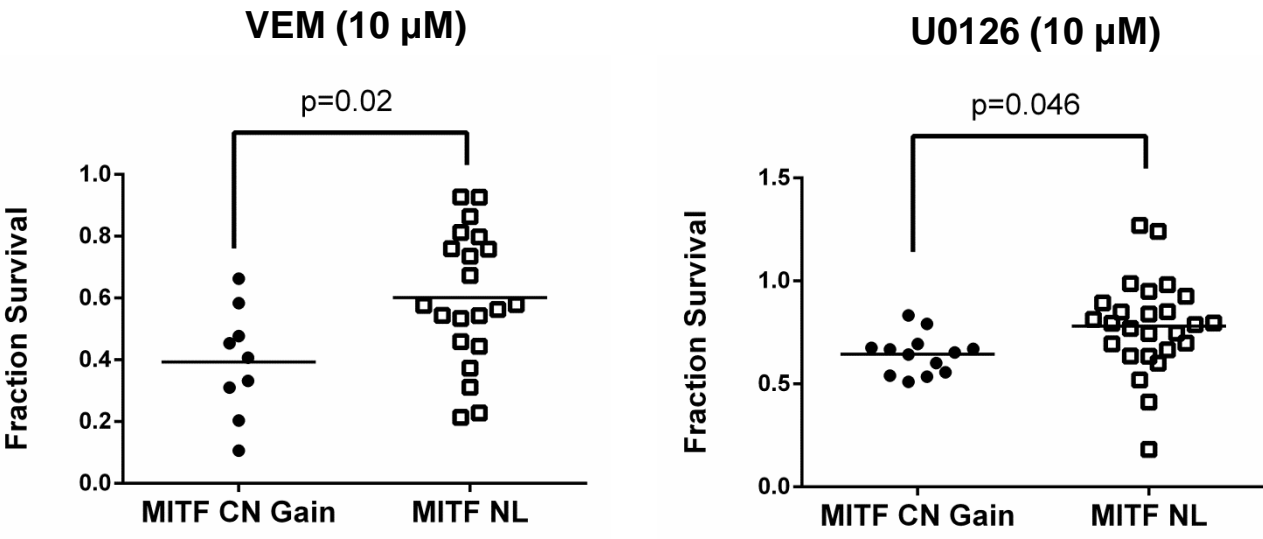

**Fig S5.** MITF amplification is associated with increased VEM and U0126 sensitivity.

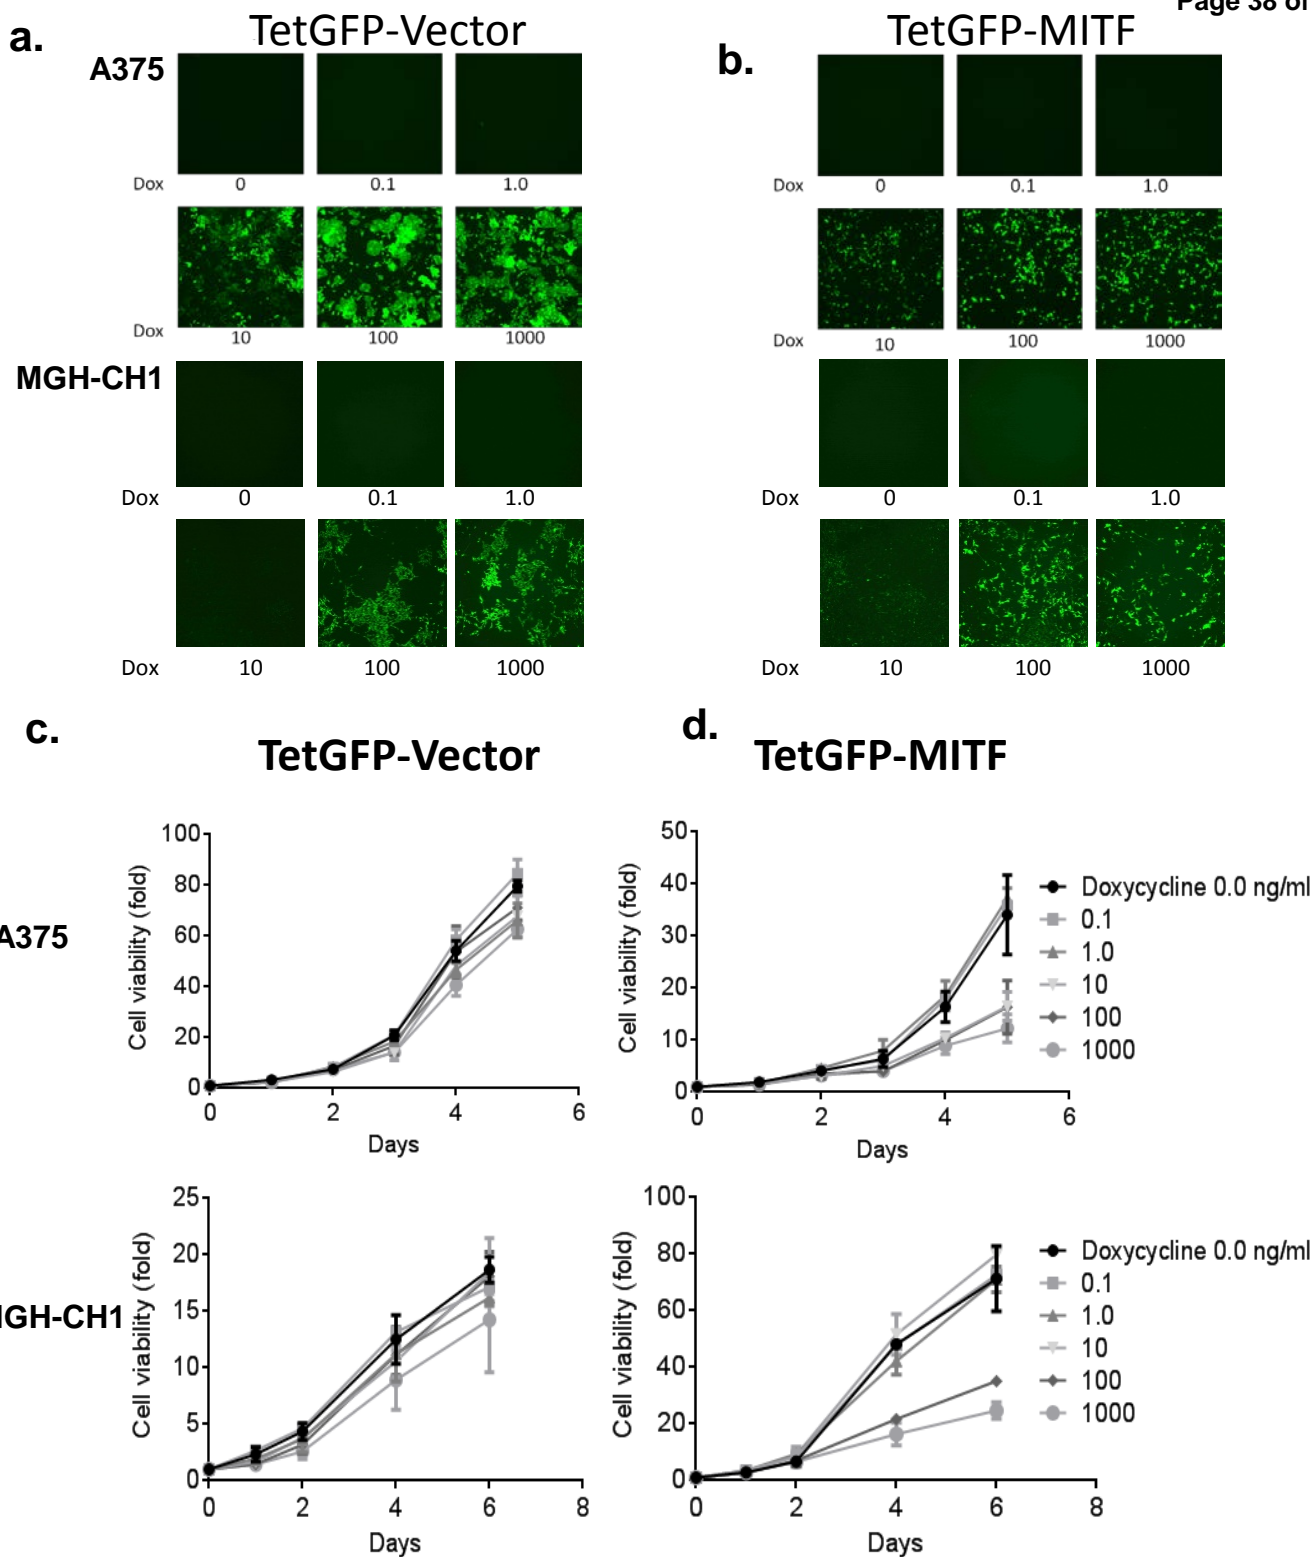

**Fig S6. Induction of MITF leads to proliferative arrest.** A375 and MGH-CH1 cells were transduced with (A) TetGFP-vector or (B) TetGFP-MITF. (C) Addition of doxycycline shows increase in GFP fluorescence in both TetGFP-vector and TetGFP-MITF. (C,D). Increasing doxycycline leads to proliferative arrest only in the TetGFP-MITF cells (D) but not the TetGFP-vector controls (C).

Table S1

|              | A375 sample 1 | A375 sample 2 | A375 sample 3 | A375R sample 1 | A375R sample 2 |
|--------------|---------------|---------------|---------------|----------------|----------------|
| MAGEA1       | -1.174433333  | -1.221366667  | -1.241966667  | 1.299266667    | 1.277666667    |
| IL24         | -0.532133333  | -0.868        | -1.644833333  | 1.250433333    | 1.354066667    |
| LY96         | -2.045633333  | -1.757966667  | -1.5331       | -0.153233333   | 0.115666667    |
| TM4SF19      | -0.830866667  | -0.906733333  | -0.940133333  | 0.7957         | 0.876466667    |
| HBEGF        | -0.065966667  | -0.650266667  | -0.816966667  | 1.461633333    | 0.8373         |
| PCLO         | -0.195        | -0.162633333  | -0.531166667  | 1.4073         | 1.422033333    |
| C15orf54     | 0.2944        | -0.281433333  | -0.618166667  | 1.682866667    | 1.5065         |
| CXorf48      | -0.941933333  | -0.9411       | -0.884066667  | 0.643466667    | 0.734733333    |
| EGR1         | -1.126166667  | -1.634633333  | -1.320733333  | 0.449666667    | -0.035966667   |
| LOC100216001 | -0.116833333  | -0.4947       | -0.411966667  | 1.265733333    | 1.0619         |
| LOC650024    | -0.6257       | -0.6536       | -0.7489       | 0.916133333    | 0.778466667    |
| CYB5R2       | -0.4648       | -0.854466667  | -0.9552       | 0.6516         | 0.727466667    |
| COL13A1      | -0.618966667  | -0.419466667  | -0.128        | 0.676966667    | 1.042933333    |
| TM4SF18      | 0.048166667   | 0.020433333   | -0.367633333  | 1.278          | 1.3514         |
| STC1         | -0.985966667  | -0.891666667  | -0.058233333  | 0.663366667    | 0.7112         |
| CPVL         | -1.139333333  | -1.111533333  | -0.8939       | 0.122366667    | 0.3859         |
| LOC387841    | 0.228066667   | 0.027833333   | -0.125833333  | 1.560833333    | 1.360266667    |
| ESM1         | 0.041566667   | 0.024566667   | 0.601766667   | 1.435666667    | 1.4789         |
| ZYX          | -0.687766667  | -0.6605       | -0.555533333  | 0.527833333    | 0.5881         |
| HSPB8        | -0.680966667  | -0.7607       | -0.817966667  | 0.423133333    | 0.5522         |
| GDF15        | -1.0158       | -0.623033333  | -0.232133333  | 0.202333333    | 0.8809         |
| M160         | -0.787933333  | -0.985566667  | -0.937333333  | 0.3259         | 0.310633333    |
| SLC22A18AS   | -0.651933333  | -0.5494       | -0.3157       | 0.322366667    | 0.726266667    |
| NT5E         | -0.6808       | -0.9072       | -0.3193       | 0.470166667    | 0.3735         |
| IL12A        | -0.3155       | -0.5106       | -0.603666667  | 0.860833333    | 0.611866667    |
| PROS1        | -1.195        | -1.059466667  | -0.789466667  | -0.005833333   | 0.102566667    |
| WFDC3        | -0.712233333  | -0.8034       | -0.899166667  | 0.1446         | 0.501166667    |
| TMEM200A     | 0.0333        | -0.0343       | -0.0703       | 1.0591         | 1.145933333    |
| COMMD10      | -0.651733333  | -0.469633333  | -0.3421       | 0.4294         | 0.622033333    |
| DUSP5        | 0.0032        | -0.500533333  | -0.510766667  | 0.963166667    | 0.459633333    |
| DGKG         | -0.2935       | -0.479666667  | -0.657533333  | 0.856966667    | 0.733566667    |
| DTNA         | -1.168966667  | -0.917033333  | -0.833933333  | -0.017266667   | 0.185633333    |
| ARHGDI B     | -0.486766667  | -0.017766667  | -0.067966667  | 0.734233333    | 1.079866667    |
| ANXA10       | -0.648133333  | -0.544733333  | -0.0621       | 0.223466667    | 0.655866667    |
| 3-Mar        | 0.321933333   | 0.077433333   | -0.508666667  | 1.320566667    | 1.037633333    |
| CSF2         | -0.561033333  | -0.691533333  | 0.200333333   | 0.766833333    | 0.635366667    |
| DENND2A      | -0.1146       | -0.171733333  | -0.459833333  | 0.8217         | 1.0199         |
| ANKRD1       | 0.254666667   | 0.092633333   | -0.2876       | 1.559766667    | 0.984933333    |
| ADCK2        | -0.518533333  | -0.671266667  | -0.6901       | 0.3597         | 0.468466667    |
| FOSL1        | -0.270833333  | -0.5723       | -0.438066667  | 0.689366667    | 0.5128         |
| UCN2         | 0.153633333   | -0.331933333  | 0.0399        | 1.000233333    | 0.7719         |
| EEF1A2       | -1.238466667  | -1.1789       | -0.188433333  | -0.025066667   | 0.057333333    |
| PSMD2        | -0.252166667  | -0.270333333  | -0.380933333  | 0.722466667    | 0.6724         |
| MLPH         | -0.194933333  | -0.171866667  | -0.107066667  | 0.700533333    | 0.944533333    |
| CD68         | -1.208466667  | -0.969333333  | -0.670633333  | -0.0899        | 0.235933333    |

|           |              |              |              |              |              |
|-----------|--------------|--------------|--------------|--------------|--------------|
| AADACL1   | -0.043066667 | -0.537066667 | -0.8794      | 0.714733333  | 0.582933333  |
| KIAA1324  | -0.186166667 | -0.1059      | -0.550833333 | 0.798833333  | 0.978533333  |
| LOC729231 | -0.504566667 | -0.357533333 | -0.535766667 | 0.555066667  | 0.5759       |
| TGM2      | -0.159666667 | -0.094433333 | 0.222433333  | 1.022166667  | 0.854933333  |
| TPK1      | -0.850366667 | -0.8914      | -0.634333333 | 0.011933333  | 0.1908       |
| KISS1     | -0.1255      | -0.097333333 | -0.177533333 | 1.203133333  | 1.079433333  |
| CD163L1   | -0.490766667 | -0.628933333 | -0.677       | 0.430266667  | 0.361266667  |
| HMGA2     | -0.232566667 | -0.6474      | -0.519133333 | 0.5652       | 0.3299       |
| AGK       | -0.395966667 | -0.392766667 | -0.520333333 | 0.476033333  | 0.398033333  |
| PGBD3     | -0.0448      | -0.264       | -0.4441      | 0.927466667  | 0.572433333  |
| NAMPT     | -0.120566667 | -0.187333333 | -0.388033333 | 0.629033333  | 0.7493       |
| FAM131A   | -0.9275      | -0.7276      | -0.610666667 | 0.0817       | 0.237866667  |
| SLITRK1   | -0.2549      | -0.371466667 | -0.5852      | 0.5266       | 0.486466667  |
| MYLK      | -0.746166667 | -0.920333333 | -0.985766667 | 0.0402       | 0.048566667  |
| RPL39L    | -0.405966667 | -0.440266667 | -0.6857      | 0.3925       | 0.398266667  |
| PION      | -0.517333333 | -0.186866667 | -0.301833333 | 0.398033333  | 0.719933333  |
| HRASLS    | -0.4577      | -0.418433333 | -0.6146      | 0.421866667  | 0.399366667  |
| DNAJB6    | -0.147266667 | -0.280666667 | -0.451       | 0.664066667  | 0.610266667  |
| SLC14A1   | -0.327733333 | -0.272066667 | -0.2517      | 0.430366667  | 0.665566667  |
| MRPL47    | -0.424966667 | -0.201233333 | -0.760266667 | 0.486        | 0.4826       |
| FHL1      | -0.574333333 | -0.554433333 | -0.3604      | 0.297433333  | 0.373733333  |
| LAMB3     | -0.472633333 | -0.612766667 | -0.553366667 | 0.592966667  | 0.2491       |
| TM4SF1    | -0.052       | -0.330966667 | -0.429766667 | 0.681933333  | 0.588833333  |
| SERINC2   | -0.5294      | -0.140266667 | -0.3442      | 0.4427       | 0.644966667  |
| UBR4      | -0.205066667 | -0.562       | -0.493766667 | 0.611666667  | 0.476766667  |
| CLYBL     | -0.897733333 | -0.981666667 | -0.685133333 | -0.017566667 | -0.003333333 |
| LOC387820 | -0.241333333 | -0.3071      | -0.425266667 | 0.6384       | 0.528733333  |
| LOC731486 | -0.369833333 | -0.602833333 | -0.745633333 | 0.158233333  | 0.380066667  |
| LOC88523  | -0.991533333 | -0.917       | -0.7502      | -0.0383      | 0.040933333  |
| RFC4      | -0.275166667 | -0.72        | -0.672533333 | 0.415933333  | 0.259133333  |
| SOHLH2    | -0.301333333 | -0.334266667 | -0.5813      | 0.520633333  | 0.385166667  |
| SQSTM1    | -0.6182      | -0.854766667 | -0.7061      | 0.063066667  | 0.240433333  |
| UCA1      | -0.579633333 | -0.247166667 | -0.097833333 | 0.257366667  | 0.525        |
| GOLT1A    | -0.8933      | -0.783666667 | -0.752166667 | 0.080833333  | 0.063633333  |
| DLC1      | 0.154366667  | -0.230033333 | -0.3709      | 0.603166667  | 0.695766667  |
| EVI1      | -0.7788      | -0.602433333 | -0.606233333 | 0.157233333  | 0.097266667  |
| PARL      | -0.4829      | -0.609433333 | -0.785833333 | 0.291533333  | 0.227133333  |
| PCOLCE2   | -0.6489      | -0.8998      | -0.617633333 | 0.097766667  | 0.007433333  |
| HIST1H2BK | -0.611166667 | -0.881       | -0.3597      | 0.128666667  | 0.177033333  |
| NMNAT2    | -0.232533333 | -0.119533333 | -0.026066667 | 0.738733333  | 0.6619       |
| FNDC3B    | -0.716833333 | -0.5282      | -0.1488      | 0.1474       | 0.377266667  |
| NUPR1     | -0.961466667 | -0.789866667 | -0.863233333 | -0.1189      | -0.0862      |
| LPXN      | -0.173266667 | -0.3513      | -0.421533333 | 0.372166667  | 0.6417       |
| FHL2      | -0.389866667 | -0.2787      | -0.7828      | 0.313433333  | 0.4213       |
| LOC728285 | 1.246933333  | 0.527666667  | -0.1375      | 1.682666667  | 1.3921       |
| FXR1      | -0.234366667 | -0.3912      | -0.3935      | 0.571733333  | 0.359466667  |
| ACTL6A    | -0.3956      | -0.382166667 | -0.5745      | 0.351566667  | 0.335433333  |



|          |              |              |              |              |             |
|----------|--------------|--------------|--------------|--------------|-------------|
| FAM133A  | -0.350133333 | -0.297533333 | -0.4731      | 0.387933333  | 0.4021      |
| S1PR1    | -0.0048      | -0.3733      | -0.621633333 | 0.7896       | 0.3718      |
| WDR53    | -0.144466667 | -0.393133333 | -0.507133333 | 0.511666667  | 0.3752      |
| KCTD12   | -0.402766667 | -0.5036      | -0.4581      | 0.299533333  | 0.398733333 |
| ABLIM1   | -0.4694      | -0.672533333 | -0.302333333 | 0.179033333  | 0.286666667 |
| DCUN1D1  | -0.147433333 | -0.157933333 | -0.206233333 | 0.566066667  | 0.8107      |
| GOLPH4   | -0.086833333 | -0.554466667 | -0.4714      | 0.576533333  | 0.355466667 |
| ALG3     | -0.213566667 | -0.3613      | -0.3376      | 0.461966667  | 0.5511      |
| PHF11    | -0.874066667 | -0.684266667 | -0.545766667 | -0.1564      | 0.119233333 |
| KIAA1147 | -0.675       | -0.573066667 | -0.306166667 | 0.154533333  | 0.231133333 |
| ADRB2    | 0.261        | -0.089066667 | -0.804166667 | 0.729066667  | 0.492433333 |
| SNORD13  | -1.041833333 | -0.813       | -0.427       | -0.068566667 | 0.222866667 |
| NCBP2    | -0.3365      | -0.418366667 | -0.6878      | 0.420133333  | 0.166433333 |
| TERC     | -0.373933333 | -0.428566667 | -0.248833333 | 0.425        | 0.5862      |
| TMEM41A  | -0.208166667 | -0.452233333 | -0.538366667 | 0.471266667  | 0.216933333 |
| CASP2    | -0.270166667 | -0.3593      | -0.292166667 | 0.466233333  | 0.390733333 |
| NOV      | -0.577966667 | -0.524266667 | -1.084666667 | 0.0253       | 0.185033333 |
| CLDND1   | -0.480533333 | -0.601133333 | -0.396333333 | 0.144433333  | 0.132       |
| ECT2     | 0.036666667  | -0.184566667 | -0.170633333 | 0.788433333  | 0.635033333 |
| POU4F1   | -0.447566667 | -0.383366667 | -0.4501      | 0.267333333  | 0.366766667 |
| PPP1R2   | -0.6095      | -0.5917      | -0.621666667 | 0.106        | 0.067566667 |
| POLR2H   | -0.177266667 | -0.213533333 | -0.214966667 | 0.553833333  | 0.409       |
| SLC25A43 | -0.2015      | -0.2455      | -0.371       | 0.4782       | 0.3755      |
| PTPRR    | -0.493666667 | -0.700966667 | -0.613933333 | 0.3317       | 0.1257      |
| IL27RA   | -0.3279      | -0.485566667 | -0.0624      | 0.4532       | 0.297666667 |
| SERPINB7 | 0.3622       | 0.049566667  | -0.699333333 | 1.1328       | 0.5575      |
| COL6A3   | -0.106       | -0.5492      | -0.644866667 | 0.372        | 0.1053      |
| OKL38    | -0.0872      | -0.111366667 | -0.478833333 | 0.725        | 0.669266667 |
| TNK2     | -0.5211      | -0.540333333 | -0.420566667 | 0.156866667  | 0.249033333 |
| CCDC50   | -0.527266667 | -0.3157      | -0.0779      | 0.253866667  | 0.532666667 |
| MINA     | -0.140433333 | -0.3674      | -0.3606      | 0.510266667  | 0.440566667 |
| BRI3     | -0.783566667 | -0.711133333 | -0.5456      | 0.008        | 0.017533333 |
| CATSPER1 | -0.869866667 | -0.589233333 | -0.3581      | 0.059466667  | 0.1105      |
| GSTK1    | -0.8224      | -0.7227      | -0.366166667 | -0.068666667 | 0.0383      |
| SSBP1    | -0.2421      | -0.357333333 | -0.400066667 | 0.438366667  | 0.309033333 |
| PINK1    | -0.992833333 | -0.581166667 | -0.508566667 | -0.084366667 | 0.033933333 |
| PAK2     | -0.1117      | -0.4435      | -0.087633333 | 0.4382       | 0.516333333 |
| HTATIP2  | -0.862633333 | -0.551433333 | -0.540333333 | -0.097733333 | 0.0659      |
| PDCD10   | -0.171666667 | -0.330033333 | -0.322       | 0.528866667  | 0.383966667 |
| DDIT3    | -0.845366667 | -0.929933333 | -1.055233333 | 0.0302       | -0.1606     |
| CYP2R1   | -0.3868      | -0.353566667 | -0.569       | 0.2187       | 0.313466667 |
| BRI3P1   | -0.7629      | -0.473366667 | -0.675266667 | -0.0777      | 0.1412      |
| NDUFB2   | -0.576733333 | -0.5694      | -0.4259      | 0.137333333  | 0.1508      |
| GADD45A  | -0.148866667 | -0.4193      | -1.0023      | 0.368133333  | 0.217366667 |
| MAPKAPK3 | -0.405666667 | -0.412566667 | -0.2276      | 0.211        | 0.3816      |
| CCNA1    | -0.089166667 | -0.181333333 | -0.656866667 | 0.6529       | 0.411566667 |
| MFI2     | -0.061866667 | -0.353766667 | -0.351666667 | 0.4901       | 0.3985      |

|              |              |              |              |              |              |
|--------------|--------------|--------------|--------------|--------------|--------------|
| ATP6V0E2     | -0.632033333 | -0.474366667 | -0.578433333 | 0.014933333  | 0.237733333  |
| VIPR1        | -0.182833333 | -0.111466667 | -0.264066667 | 0.356233333  | 0.667933333  |
| IQCB1        | -0.183       | -0.409966667 | -0.5945      | 0.440266667  | 0.120133333  |
| EIF5A2       | -0.193466667 | -0.3882      | -0.363833333 | 0.581133333  | 0.2578       |
| P8           | -0.739333333 | -0.706933333 | -0.684433333 | -0.043633333 | -0.034733333 |
| TFRC         | -0.186666667 | -0.4709      | -0.509333333 | 0.4463       | 0.200966667  |
| C19orf33     | -0.34        | -0.340933333 | -0.2446      | 0.156433333  | 0.385066667  |
| ADAMTS1      | -0.302866667 | -0.524766667 | -0.0578      | 0.649466667  | 0.2981       |
| LOC729768    | -0.066566667 | -0.183433333 | -0.131833333 | 0.718233333  | 0.5313       |
| ABCF2        | -0.109833333 | -0.432766667 | -0.402433333 | 0.384466667  | 0.214633333  |
| ALG5         | -0.163833333 | -0.221666667 | -0.2431      | 0.545933333  | 0.532066667  |
| MRPS33       | -0.6869      | -0.5276      | -0.308066667 | -0.170333333 | 0.2544       |
| ECE2         | -0.220566667 | -0.391066667 | -0.3883      | 0.411466667  | 0.266733333  |
| TTC14        | -0.525933333 | -0.5465      | -0.7841      | 0.102366667  | 0.051666667  |
| SENP5        | -0.473333333 | -0.352033333 | -0.358666667 | 0.207466667  | 0.1668       |
| DNAJB11      | -0.4823      | -0.3663      | -0.389766667 | 0.189        | 0.311166667  |
| LSG1         | -0.2778      | -0.300633333 | -0.434066667 | 0.3956       | 0.268066667  |
| SPHK1        | -0.152666667 | -0.483       | -0.247466667 | 0.358066667  | 0.300566667  |
| EPDR1        | -0.163633333 | -0.405       | -0.3445      | 0.361733333  | 0.3311       |
| USP13        | -0.313466667 | -0.164966667 | -0.352466667 | 0.4436       | 0.3331       |
| LIF          | 0.0311       | -0.2959      | -0.280366667 | 0.4186       | 0.369766667  |
| EIF2B5       | -0.223066667 | -0.2904      | -0.283333333 | 0.369633333  | 0.389333333  |
| COL17A1      | -0.3996      | -0.441333333 | -0.4744      | 0.0406       | 0.312833333  |
| UBE3C        | -0.091266667 | -0.310266667 | -0.4031      | 0.422133333  | 0.310433333  |
| SDSL         | -0.8996      | -0.638333333 | -0.4678      | -0.193766667 | 0.090966667  |
| NSBP1        | -0.450766667 | -0.2719      | -0.446       | 0.026733333  | 0.3661       |
| FSTL1        | -0.241533333 | -0.364266667 | -0.1081      | 0.4605       | 0.311333333  |
| ATP6VOA4     | 0.037733333  | -0.140633333 | -0.3782      | 0.332566667  | 0.4667       |
| TMEM44       | -0.150466667 | -0.195866667 | -0.027066667 | 0.285733333  | 0.591266667  |
| C20orf100    | -0.5303      | -0.1289      | 0.5825       | 0.0146       | 0.697666667  |
| APOBEC3G     | -0.769966667 | 0.002        | 0.5512       | -0.1403      | 0.629333333  |
| NDRG1        | -0.679733333 | -0.640366667 | -0.0925      | 0.0597       | 0.215833333  |
| C11orf75     | 0.061733333  | -0.208333333 | -0.418733333 | 0.471233333  | 0.429766667  |
| LOC100132797 | -0.372933333 | -0.3539      | -0.275933333 | 0.406633333  | 0.218233333  |
| PLAUR        | 0.4039       | -0.2426      | 0.026066667  | 0.8868       | 0.483866667  |
| BTG3         | 0.051833333  | -0.175966667 | -0.4173      | 0.497933333  | 0.458666667  |
| DENND1A      | -0.0082      | -0.227966667 | -0.328233333 | 0.456866667  | 0.3777       |
| ABCC5        | -0.194033333 | -0.2286      | -0.2814      | 0.390266667  | 0.434466667  |
| AP2M1        | -0.497233333 | -0.362133333 | -0.347966667 | 0.112733333  | 0.167033333  |
| LOC286512    | -0.863333333 | -0.460033333 | -0.383233333 | -0.031266667 | 0.100233333  |
| MKRN1        | -0.724233333 | -0.435566667 | -0.3006      | 0.0616       | 0.033833333  |
| ITGA5        | -0.612366667 | -0.479533333 | -0.0195      | 0.029133333  | 0.252533333  |
| FBXO45       | -0.059766667 | -0.383533333 | -0.4357      | 0.311266667  | 0.2788       |
| PDGFC        | -0.375766667 | -0.3186      | -0.431033333 | 0.3699       | 0.107266667  |
| ARHGEF5      | -0.254666667 | -0.2825      | -0.308166667 | 0.3052       | 0.3066       |
| LOC653110    | -0.0847      | -0.1184      | -0.185733333 | 0.994733333  | 0.4466       |
| ZNF746       | -0.147833333 | -0.291       | -0.3587      | 0.428466667  | 0.311633333  |

|           |              |              |              |              |              |
|-----------|--------------|--------------|--------------|--------------|--------------|
| YEATS2    | -0.3578      | -0.471066667 | -0.150166667 | 0.3327       | 0.172866667  |
| DNAJC19   | -0.366433333 | -0.251066667 | -0.346466667 | 0.234733333  | 0.321333333  |
| ELF1      | -0.670066667 | -0.391       | -0.665866667 | -0.044133333 | 0.072133333  |
| SP140     | -0.470033333 | -0.060333333 | -0.2176      | 0.257866667  | 0.470833333  |
| MTRF1     | -0.495733333 | -0.421033333 | -0.280966667 | 0.2056       | 0.109733333  |
| RAC2      | -0.378866667 | -0.285866667 | -0.1368      | 0.211233333  | 0.496566667  |
| TSC22D1   | -0.478033333 | -0.5175      | -0.444566667 | -0.0431      | 0.304833333  |
| EIF4A2    | -0.669833333 | -0.553366667 | -0.292966667 | 0.058366667  | 0.117133333  |
| BCL11A    | -0.272666667 | -0.660266667 | -0.069966667 | 0.454333333  | 0.2552       |
| TRIM5     | -0.553966667 | -0.309266667 | -0.356266667 | 0.125033333  | 0.266433333  |
| DNAJC15   | -0.308       | -0.2654      | -0.410633333 | 0.2437       | 0.314366667  |
| SNORA63   | 0.014266667  | -0.065533333 | -0.497       | 0.506233333  | 0.516433333  |
| LGALS8    | -0.539433333 | -0.6922      | -0.735566667 | 0.101966667  | -0.141633333 |
| EPHA2     | 0.3485       | 0.041533333  | -0.033333333 | 0.851733333  | 0.544866667  |
| ZMAT3     | -0.597633333 | -0.622966667 | -0.453366667 | -0.027866667 | 0.0786       |
| OPA1      | -0.3047      | -0.37        | -0.3329      | 0.3638       | 0.078466667  |
| NMD3      | -0.241066667 | -0.269966667 | -0.3406      | 0.263166667  | 0.393133333  |
| GFPT2     | -0.302566667 | -0.1883      | -0.0381      | 0.2306       | 0.4474       |
| HSPA1A    | -0.002166667 | -0.111833333 | -0.248433333 | 0.2943       | 0.765466667  |
| SDC4      | -0.053466667 | -0.6175      | -0.418866667 | 0.4127       | 0.118266667  |
| CDA       | -0.2443      | -0.172833333 | -0.135566667 | 0.3756       | 0.519433333  |
| MYC       | 0.184733333  | -0.239266667 | -0.421433333 | 0.581666667  | 0.5246       |
| MCCC1     | -0.974766667 | -0.572166667 | -0.4688      | -0.186766667 | -0.071833333 |
| LMBR1     | -0.4581      | -0.168233333 | -0.189633333 | 0.088133333  | 0.4292       |
| GALNTL4   | -0.038533333 | -0.1771      | -0.259666667 | 0.524        | 0.309133333  |
| RHEB      | -0.176933333 | -0.2577      | -0.243233333 | 0.359333333  | 0.393566667  |
| ETV5      | -0.731633333 | -0.3629      | -0.167466667 | 0.074666667  | 0.136366667  |
| MTMR11    | -0.541566667 | -0.3868      | -0.3025      | 0.045233333  | 0.200533333  |
| PDIA5     | -0.1706      | -0.380666667 | -0.382133333 | 0.2259       | 0.268266667  |
| NLRP3     | 0.061633333  | -0.0445      | -0.034233333 | 0.711766667  | 0.596233333  |
| INTS6     | -0.2292      | -0.4411      | 0.0171       | 0.2265       | 0.3852       |
| TNFRSF12A | 0.141066667  | -0.262533333 | -0.385433333 | 0.583933333  | 0.2587       |
| GAS6      | -0.126366667 | -0.371333333 | -0.395966667 | 0.516766667  | 0.229133333  |
| LOC645166 | -0.436633333 | -0.3514      | -0.364533333 | 0.208466667  | 0.200233333  |
| PIK3CA    | -0.412866667 | -0.173266667 | -0.317033333 | 0.2903       | 0.345733333  |
| LOC646723 | -0.3119      | -0.035266667 | 0.172533333  | 0.505066667  | 0.553633333  |
| USPL1     | -0.1208      | -0.287733333 | -0.2037      | 0.433266667  | 0.251766667  |
| DIAPH3    | -0.095033333 | -0.071666667 | -0.425933333 | 0.424833333  | 0.3595       |
| RIN2      | -0.1843      | -0.291133333 | -0.471133333 | 0.379866667  | 0.255133333  |
| NINJ1     | -0.801233333 | -0.4129      | -0.367866667 | -0.174866667 | 0.1018       |
| EIF4G1    | 0.089066667  | -0.2413      | -0.474033333 | 0.450733333  | 0.258266667  |
| SEN2      | -0.2906      | -0.224733333 | -0.312933333 | 0.3307       | 0.292033333  |
| GDPD5     | -0.4739      | -0.429833333 | -0.136933333 | 0.095333333  | 0.214        |
| ATG3      | -0.193266667 | -0.2471      | -0.5145      | 0.277833333  | 0.2341       |
| OBFC2A    | 0.013833333  | -0.279233333 | -0.1955      | 0.508733333  | 0.328766667  |
| IGF2BP2   | -0.519333333 | -0.421466667 | -0.028       | 0.026266667  | 0.314733333  |
| HIST1H2BD | -0.8385      | -0.571533333 | -0.165466667 | -0.270933333 | 0.1863       |

|           |              |              |              |              |              |
|-----------|--------------|--------------|--------------|--------------|--------------|
| SCYL1     | -0.447133333 | -0.398733333 | -0.375766667 | -0.0162      | 0.088        |
| AGAP3     | -0.253133333 | -0.472366667 | -0.1013      | 0.243133333  | 0.279266667  |
| MYNN      | -0.2354      | -0.250533333 | -0.339633333 | 0.315466667  | 0.3607       |
| LRRC33    | -0.1845      | -0.324266667 | -0.3117      | 0.3735       | 0.194666667  |
| PLD6      | -0.063133333 | -0.4029      | -0.620933333 | 0.390833333  | 0.049333333  |
| MSX1      | -0.041466667 | -0.228566667 | -0.181833333 | 0.631333333  | 0.2708       |
| IFRD1     | -0.1717      | -0.422733333 | -0.910533333 | 0.121666667  | 0.146766667  |
| ARL13B    | -0.103033333 | -0.242433333 | -0.064366667 | 0.4939       | 0.374166667  |
| ARL6      | -0.223466667 | -0.049333333 | -0.333333333 | 0.198233333  | 0.469133333  |
| NSUN3     | -0.3771      | -0.190466667 | -0.4678      | 0.1811       | 0.153666667  |
| S100A16   | -0.400033333 | -0.462633333 | -0.028533333 | 0.133        | 0.132066667  |
| KATNAL1   | -0.029066667 | -0.291466667 | -0.384833333 | 0.358666667  | 0.122533333  |
| SLC45A3   | -0.113666667 | -0.190466667 | -0.0951      | 0.269933333  | 0.4006       |
| LOC644589 | -0.2994      | -0.231966667 | -0.271133333 | 0.299033333  | 0.202366667  |
| C7orf10   | -0.246766667 | -0.042433333 | -0.386733333 | 0.479766667  | 0.458266667  |
| CLN5      | -0.6294      | -0.4888      | -0.4336      | -0.0992      | 0.021333333  |
| NDUFB5    | -0.601233333 | -0.5408      | -0.392933333 | -0.030933333 | 0.115        |
| ZIC2      | 0.070366667  | -0.415033333 | -0.1773      | 0.5724       | 0.3065       |
| FASTK     | -0.594833333 | -0.2656      | -0.404466667 | 0.024833333  | 0.202466667  |
| METTL7B   | -0.702266667 | -0.391833333 | -0.0427      | -0.026433333 | 0.109333333  |
| CD55      | -0.168833333 | -0.2235      | -0.135266667 | 0.273066667  | 0.270866667  |
| ZBTB20    | -0.543066667 | -0.457766667 | -0.396666667 | 0.122166667  | -0.0591      |
| KRT18     | -0.127366667 | 0.096433333  | -0.075133333 | 0.589933333  | 0.541566667  |
| C10orf78  | 0.0769       | 0.0223       | -0.133666667 | 0.319466667  | 0.5856       |
| CUL1      | -0.201533333 | -0.237333333 | -0.238366667 | 0.345933333  | 0.2137       |
| FYB       | -0.8049      | -0.483       | -0.494433333 | -0.4443      | 0.102566667  |
| SLC25A19  | 0.327166667  | 0.007466667  | -0.4267      | 0.6367       | 0.510433333  |
| SDCCAG8   | -0.294       | -0.2454      | -0.2438      | 0.2413       | 0.244466667  |
| CHIC2     | 0.0157       | -0.213366667 | -0.182733333 | 0.559933333  | 0.360633333  |
| MAOA      | -0.417366667 | -0.4208      | -0.2908      | 0.119233333  | 0.168433333  |
| KLF2      | 0.421033333  | 0.095366667  | -0.0609      | 0.7768       | 0.506033333  |
| DLEU1     | -0.358366667 | -0.118533333 | -0.453766667 | 0.2035       | 0.293233333  |
| HOMER3    | -0.201233333 | -0.145233333 | -0.0729      | 0.269566667  | 0.398733333  |
| FOXD1     | 0.28         | -0.066733333 | -0.252833333 | 0.6755       | 0.428366667  |
| ZDHHC9    | -0.450533333 | -0.474066667 | -0.174066667 | 0.224433333  | 0.1618       |
| TGFBR2    | -0.233066667 | -0.2949      | 0.036766667  | 0.1862       | 0.3041       |
| REPIN1    | -0.413633333 | -0.372033333 | -0.402033333 | 0.136233333  | 0.213166667  |
| PHLDA1    | -0.5517      | -0.512733333 | 0.188166667  | 0.081433333  | 0.171233333  |
| INSIG1    | -0.366166667 | -0.4068      | -0.0495      | 0.095233333  | 0.188033333  |
| PWWP2B    | -0.079666667 | -0.265433333 | -0.207733333 | 0.4754       | 0.2168       |
| EXOSC8    | -0.285766667 | -0.1847      | -0.584866667 | 0.2101       | -0.042633333 |
| SH3GL2    | -0.4016      | -0.231766667 | -0.173333333 | -0.030033333 | 0.2623       |
| IL4R      | -0.072       | -0.2833      | -0.238133333 | 0.334333333  | 0.238133333  |
| TBL1XR1   | -0.3109      | -0.117433333 | -0.129766667 | 0.361133333  | 0.294833333  |
| LOC641825 | -0.3278      | -0.278733333 | -0.2064      | 0.133266667  | 0.316166667  |
| GCLM      | 0.1171       | -0.238433333 | -0.580666667 | 0.564933333  | 0.2737       |
| LOC389641 | -0.3495      | -0.246866667 | -0.1489      | 0.236533333  | 0.460866667  |

|              |              |              |              |              |              |
|--------------|--------------|--------------|--------------|--------------|--------------|
| N4BP2L2      | -0.674266667 | -0.6291      | -0.564733333 | -0.048133333 | -0.149566667 |
| FYTTD1       | -0.2755      | -0.306633333 | -0.1274      | 0.1972       | 0.419766667  |
| RN7SK        | -0.157266667 | -0.246333333 | -0.171633333 | 0.659933333  | 0.328166667  |
| PTRH1        | -0.062066667 | -0.371033333 | -0.419666667 | 0.244133333  | 0.2446       |
| CD59         | -0.307166667 | -0.4917      | -0.301733333 | 0.125066667  | 0.044166667  |
| DNAJA2       | -0.109033333 | -0.270633333 | -0.2159      | 0.32         | 0.318866667  |
| TMEM156      | 0.064        | 0.337166667  | -0.3738      | 0.592666667  | 0.677466667  |
| TMEM22       | -0.139066667 | -0.264433333 | -0.376066667 | 0.3689       | 0.1171       |
| LOC643100    | -0.274066667 | -0.258633333 | -0.293933333 | 0.212        | 0.330466667  |
| FKBP15       | -0.331333333 | -0.343666667 | -0.3176      | 0.212766667  | 0.186633333  |
| KATNB1       | -0.1908      | -0.208533333 | -0.249433333 | 0.204233333  | 0.4136       |
| CXADR        | -0.596166667 | -0.395566667 | -0.425466667 | -0.0436      | 0.1189       |
| PRKCE        | -0.219566667 | -0.1369      | -0.165033333 | 0.474166667  | 0.351933333  |
| LOC645515    | -0.008266667 | -0.024533333 | -0.093433333 | 0.4104       | 0.495        |
| STX3         | -0.1933      | -0.640533333 | -0.822       | 0.2171       | -0.223533333 |
| ITPRIPL2     | -0.168366667 | -0.2722      | 0.104633333  | 0.4242       | 0.327066667  |
| AMDHD2       | -0.2824      | -0.319966667 | -0.2501      | 0.139933333  | 0.088033333  |
| FOXP1        | 0.0461       | 0.0066       | -0.0725      | 0.520966667  | 0.415        |
| NUB1         | -0.5352      | -0.467066667 | -0.405866667 | -0.0451      | 0.108966667  |
| RBM26        | -0.097433333 | -0.4421      | -0.278133333 | 0.307466667  | 0.1511       |
| ACTA2        | -1.144666667 | -0.534666667 | -0.09        | -0.403266667 | 0.050966667  |
| SLC7A1       | -0.276733333 | -0.5253      | -0.409233333 | 0.0865       | 0.032533333  |
| HOXD13       | -0.013033333 | -0.1785      | -0.198866667 | 0.4839       | 0.248033333  |
| LYST         | -0.555966667 | -0.3712      | -0.2871      | -0.257866667 | 0.358233333  |
| WBP4         | -0.320566667 | -0.2474      | -0.386133333 | 0.187266667  | 0.1733       |
| EDG1         | 0.127966667  | -0.250266667 | -0.395333333 | 0.662166667  | 0.18         |
| SNAPC1       | 0.468033333  | -0.010533333 | -0.463233333 | 0.9398       | 0.374833333  |
| ITGA2        | -0.292666667 | -0.285433333 | -0.038533333 | 0.0054       | 0.380866667  |
| PRKCI        | -0.299233333 | -0.107833333 | -0.253066667 | 0.260066667  | 0.365166667  |
| CTSB         | -0.718233333 | -0.6855      | -0.0924      | -0.0767      | 0.008233333  |
| GPR175       | -0.422       | -0.465866667 | -0.6151      | 0.1978       | -0.027433333 |
| UCHL3        | -0.0813      | -0.185966667 | -0.394166667 | 0.413366667  | 0.199533333  |
| RAB22A       | -0.279       | -0.222633333 | -0.194133333 | 0.1626       | 0.1798       |
| FOXA1        | -0.162933333 | -0.215133333 | -0.010033333 | 0.264066667  | 0.269166667  |
| CTSD         | -0.5286      | -0.363766667 | -0.328366667 | -0.1451      | 0.100366667  |
| USMG5        | -0.26        | -0.404466667 | -0.345333333 | 0.146433333  | 0.138033333  |
| LOC644100    | -0.259033333 | -0.103366667 | 0.119533333  | 0.072733333  | 0.426733333  |
| LPP          | -0.591166667 | -0.4951      | -0.316466667 | -0.170133333 | 0.0447       |
| GCNT3        | -0.4653      | -0.478733333 | -0.528833333 | -0.176266667 | 0.2076       |
| ATOX1        | -0.198       | -0.361366667 | -0.1979      | 0.183066667  | 0.173166667  |
| TBX3         | -0.170633333 | -0.092333333 | -0.093666667 | 0.2842       | 0.266066667  |
| LOC100132948 | -0.1624      | -0.142733333 | -0.339933333 | 0.335933333  | 0.265166667  |
| MIR221       | -0.1052      | -0.168466667 | -0.190166667 | 0.2691       | 0.2732       |
| ATP6V0E1     | -0.2982      | -0.368766667 | -0.437933333 | 0.186066667  | 0.013733333  |
| FAR1         | -0.2779      | -0.134566667 | -0.258066667 | 0.285366667  | 0.159933333  |
| SOX9         | -0.056733333 | -0.1232      | 0.1656       | 0.2788       | 0.472366667  |
| MLKL         | -0.090966667 | -0.224966667 | -0.1492      | 0.195566667  | 0.421366667  |

|           |              |              |              |              |             |
|-----------|--------------|--------------|--------------|--------------|-------------|
| SNORD12C  | -0.093833333 | -0.140666667 | -0.4975      | 0.219133333  | 0.343433333 |
| GOLIM4    | -0.2274      | -0.365133333 | -0.3408      | 0.2307       | 0.198066667 |
| MMP1      | -0.5157      | -0.357766667 | -0.126233333 | 0.014433333  | 0.294       |
| ABHD7     | -0.1523      | -0.0696      | -0.123633333 | 0.311066667  | 0.331633333 |
| TRIM8     | -0.158733333 | -0.253833333 | -0.166433333 | 0.254433333  | 0.271633333 |
| RRM2B     | -0.4266      | -0.232133333 | -0.351733333 | 0.111866667  | 0.241966667 |
| CTGF      | 0.4713       | 0.019133333  | -0.4689      | 0.683766667  | 0.536133333 |
| LOC441511 | -0.258866667 | -0.299333333 | -0.229       | 0.271833333  | 0.156233333 |
| RHOF      | -0.360633333 | -0.147933333 | -0.126966667 | 0.195933333  | 0.257133333 |
| DNER      | -0.0617      | -0.074       | -0.347766667 | 0.149766667  | 0.4176      |
| LRCH3     | -0.1046      | -0.1846      | -0.180733333 | 0.355766667  | 0.230433333 |
| ZDHHC23   | -0.270166667 | -0.224533333 | -0.264166667 | 0.081166667  | 0.296766667 |
| SCHIP1    | 0.299333333  | -0.035666667 | -0.166033333 | 0.738366667  | 0.339633333 |
| ABL2      | 0.0652       | -0.1882      | -0.705433333 | 0.285266667  | 0.1822      |
| FXYD5     | -0.1726      | -0.2614      | -0.0142      | 0.3573       | 0.2103      |
| CENTB2    | -0.2998      | -0.4146      | -0.130533333 | 0.219466667  | 0.153933333 |
| ACAP2     | -0.091033333 | -0.1514      | -0.3571      | 0.324666667  | 0.114466667 |
| PMAIP1    | -0.226666667 | -0.3573      | -0.3097      | 0.148366667  | 0.125066667 |
| ARPM1     | -0.373233333 | -0.2467      | -0.3677      | -0.002566667 | 0.2275      |
| NAV3      | 0.011566667  | 0.040566667  | -0.010666667 | 0.5637       | 0.3588      |
| ADAMTS6   | 0.178033333  | -0.001433333 | -0.324266667 | 0.711333333  | 0.356733333 |
| FTHL3     | -0.968466667 | -0.438266667 | -0.3151      | -0.510633333 | 0.143833333 |
| HSPA1B    | 0.305966667  | -0.2341      | -0.461966667 | 0.2523       | 0.472466667 |
| PRRG1     | -0.0933      | -0.215566667 | -0.134       | 0.408633333  | 0.237266667 |
| ETS1      | -0.007466667 | -0.525433333 | -0.637       | 0.510833333  | 0.028833333 |
| PDCD2     | -0.250633333 | -0.244466667 | -0.240133333 | 0.2376       | 0.3029      |
| C19orf64  | -0.2798      | -0.3877      | -0.1488      | 0.251033333  | 0.1262      |
| LOC729739 | -0.259433333 | -0.1506      | -0.1604      | 0.0936       | 0.286533333 |
| FTHL2     | -1.385566667 | -0.399333333 | -0.732266667 | -0.967733333 | 0.161       |
| KIAA1949  | -0.046033333 | -0.131566667 | -0.0047      | 0.4295       | 0.285366667 |
| TNFRSF10A | 0.209466667  | -0.2285      | -0.1411      | 0.5958       | 0.334966667 |
| WISP3     | -0.469766667 | -0.412566667 | -0.386566667 | -0.051266667 | 0.101066667 |
| FEZ2      | -0.276033333 | -0.18        | -0.1186      | 0.285766667  | 0.234166667 |
| ATP11B    | -0.281333333 | -0.235833333 | -0.1538      | 0.0682       | 0.2904      |
| BACE2     | -0.1168      | -0.214733333 | -0.1262      | 0.2388       | 0.247533333 |
| RAGE      | 0.3606       | -0.024533333 | -0.285266667 | 0.635        | 0.328466667 |
| FERMT1    | -0.000866667 | -0.300233333 | -0.171566667 | 0.227366667  | 0.2953      |
| TMEM154   | -0.5356      | -0.5107      | -0.172566667 | -0.234166667 | 0.1092      |
| SMTN      | 0.046566667  | -0.009366667 | -0.093633333 | 0.3497       | 0.467866667 |
| UGCG      | 0.084        | -0.268733333 | -0.343833333 | 0.7066       | 0.103       |
| AIM2      | -0.689166667 | -0.4503      | -0.093066667 | -0.207433333 | 0.1911      |
| MAP6D1    | -0.020933333 | -0.281766667 | -0.1721      | 0.440433333  | 0.279533333 |
| BNIP3     | -0.3263      | -0.416       | 0.0965       | -0.022233333 | 0.255833333 |
| PPAP2C    | -0.565533333 | -0.098866667 | -0.223266667 | -0.076666667 | 0.2635      |
| DUSP10    | -0.2517      | -0.397966667 | -0.495433333 | 0.014766667  | 0.152966667 |
| C13orf23  | -0.275966667 | -0.2534      | -0.3584      | 0.1508       | 0.178933333 |
| ARHGAP22  | 0.107566667  | -0.081866667 | -0.083833333 | 0.5728       | 0.349366667 |

|              |              |              |              |              |              |
|--------------|--------------|--------------|--------------|--------------|--------------|
| CDC42SE1     | -0.016433333 | -0.358266667 | -0.2585      | 0.392133333  | 0.164666667  |
| CYP4V2       | -0.6316      | -0.563433333 | -0.215666667 | -0.1627      | 0.059066667  |
| LOC100132564 | -0.026733333 | 0.164033333  | -0.328966667 | 0.797033333  | 0.521633333  |
| MEF2D        | -0.277033333 | -0.234133333 | -0.1         | 0.269166667  | 0.284966667  |
| LOC730074    | -0.857633333 | -0.427833333 | -0.130466667 | -0.098766667 | -0.0715      |
| TMUB1        | -0.519466667 | -0.241333333 | -0.250366667 | 0.098766667  | 0.051033333  |
| DNTTIP1      | -0.466666667 | -0.202233333 | -0.2957      | 0.0683       | 0.143766667  |
| DOK4         | -0.329266667 | -0.3921      | -0.175433333 | 0.160166667  | 0.0952       |
| COMT         | -0.513466667 | -0.4476      | -0.305466667 | -0.0849      | -0.005033333 |
| FMN2         | -0.434666667 | -0.387633333 | -0.286233333 | 0.0323       | 0.164333333  |
| TRIB3        | -0.331       | -0.405333333 | -0.522833333 | 0.075366667  | -0.0085      |
| ANKRD33      | -0.47        | -0.423966667 | -0.161366667 | -0.025333333 | 0.139733333  |
| UFM1         | -0.32        | -0.163       | -0.670333333 | 0.156233333  | 0.122766667  |
| PGAM1        | 0.0145       | -0.2541      | 0.039766667  | 0.381466667  | 0.316933333  |
| ZGPAT        | -0.139966667 | -0.246266667 | -0.1257      | 0.185866667  | 0.351866667  |
| CPOX         | -0.2093      | -0.154066667 | -0.129433333 | 0.138633333  | 0.465666667  |
| TSPAN5       | 0.0668       | -0.042266667 | 0.103566667  | 0.4598       | 0.5186       |
| CAMK2G       | -0.0979      | -0.099666667 | -0.0668      | 0.489933333  | 0.183533333  |
| LOC646214    | -0.1989      | -0.0572      | -0.327066667 | 0.153166667  | 0.3409       |
| GPR177       | -0.467166667 | -0.218033333 | -0.426766667 | 0.0318       | 0.1107       |
| NP           | 0.2467       | 0.026533333  | -0.2301      | 0.595766667  | 0.405933333  |
| MR1          | -0.583166667 | -0.529666667 | -0.147066667 | -0.0884      | 0.0292       |
| MRGPRX4      | -0.049333333 | -0.015166667 | -0.1145      | 0.367433333  | 0.418666667  |
| ANAPC13      | -0.295933333 | -0.256366667 | -0.288       | 0.157533333  | 0.214666667  |
| CYR61        | 0.7212       | -0.203833333 | -0.569466667 | 0.673233333  | 0.41         |
| RNF219       | -0.065666667 | -0.106533333 | -0.364166667 | 0.369        | 0.220133333  |
| SERTAD2      | -0.099166667 | -0.1452      | -0.201433333 | 0.324833333  | 0.144666667  |
| PAXIP1       | 0.1058       | -0.1988      | -0.086966667 | 0.407866667  | 0.2582       |
| BIVM         | -0.468133333 | -0.340433333 | -0.251933333 | 0.0177       | 0.117533333  |
| LOC645381    | -0.080066667 | -0.323666667 | -0.2737      | 0.344133333  | 0.155366667  |
| GPSM3        | -0.350866667 | -0.072333333 | -0.0329      | 0.1752       | 0.287533333  |
| PELO         | -0.14        | -0.169266667 | -0.286833333 | 0.273866667  | 0.267166667  |
| MGLL         | 0.1162       | -0.2937      | -0.094366667 | 0.492966667  | 0.401933333  |
| PTGES2       | -0.184566667 | -0.336166667 | -0.123866667 | 0.224966667  | 0.175366667  |
| CHCHD10      | -0.734533333 | -0.6082      | 0.022533333  | -0.2244      | 0.006066667  |
| RNF126       | 0.0616       | -0.117033333 | -0.533666667 | 0.358766667  | 0.189966667  |
| SPRYD3       | -0.163133333 | -0.226433333 | -0.217433333 | 0.149566667  | 0.333766667  |
| PARP12       | -0.318066667 | -0.319266667 | -0.268933333 | 0.151866667  | 0.045533333  |
| SSR3         | -0.203233333 | 0.0532       | -0.113       | 0.443933333  | 0.3153       |
| RAB7A        | -0.275833333 | -0.296133333 | -0.3927      | 0.014633333  | 0.0881       |
| ABCF3        | -0.205666667 | -0.150566667 | -0.264666667 | 0.297533333  | 0.0879       |
| PGRMC1       | -0.150566667 | -0.150666667 | -0.183466667 | 0.2746       | 0.326133333  |
| SLC24A6      | -0.322033333 | -0.292533333 | -0.333766667 | 0.052266667  | 0.139166667  |
| C14orf159    | -0.4509      | -0.509966667 | -0.357966667 | -0.164666667 | 0.001066667  |
| ERRFI1       | -0.4684      | -0.363033333 | 0.1448       | -0.043633333 | 0.220766667  |
| DYNC1I1      | -0.452766667 | -0.430533333 | -0.3987      | -0.0562      | 0.083066667  |
| RNASEH2B     | -0.2804      | -0.1306      | -0.424866667 | 0.0971       | 0.301233333  |

|              |              |              |              |              |              |
|--------------|--------------|--------------|--------------|--------------|--------------|
| MX1          | -0.511866667 | -0.564766667 | -0.2608      | -0.059566667 | -0.018933333 |
| ALDH2        | -0.501833333 | -0.592333333 | -0.2791      | -0.069166667 | -0.036233333 |
| DMRT2        | 0.016033333  | -0.107833333 | -0.1811      | 0.4489       | 0.430966667  |
| BCL2L1       | 0.080533333  | -0.060933333 | -0.291       | 0.449166667  | 0.2823       |
| ARRB1        | -0.317766667 | -0.2339      | 0.094133333  | 0.164333333  | 0.269266667  |
| C1orf97      | -0.564266667 | -0.340066667 | -0.2196      | -0.018433333 | 0.171333333  |
| LOC653888    | -0.3991      | -0.4194      | 0.081166667  | 0.118566667  | 0.1959       |
| CXorf40A     | -0.112933333 | -0.235233333 | -0.4531      | 0.2962       | 0.135666667  |
| LOC652226    | -0.141366667 | -0.205466667 | -0.179533333 | 0.317066667  | 0.1913       |
| TRPM2        | -0.093266667 | -0.072966667 | -0.292633333 | 0.201133333  | 0.348633333  |
| MFSD1        | -0.363166667 | -0.4045      | -0.4229      | 0.0293       | 0.0512       |
| ITM2A        | -0.531033333 | -0.399133333 | -0.229066667 | 0.013133333  | 0.0845       |
| C19orf10     | -0.062233333 | -0.1479      | -0.0615      | 0.3586       | 0.3621       |
| CCND3        | 0.199366667  | -0.1243      | -0.211233333 | 0.3991       | 0.3688       |
| LSP1         | -0.255666667 | -0.192966667 | -0.2699      | 0.159833333  | 0.226966667  |
| BASP1        | -0.889833333 | -0.505       | -0.388166667 | -0.241233333 | -0.157066667 |
| RGS7         | -0.040833333 | -0.128866667 | -0.4855      | 0.312233333  | 0.122633333  |
| RPN1         | -0.1588      | -0.110333333 | -0.250033333 | 0.374766667  | 0.208733333  |
| CDKN1A       | -0.223266667 | -0.535566667 | -0.3271      | -0.073       | 0.186466667  |
| PIM3         | -0.115533333 | -0.1455      | -0.272866667 | 0.268233333  | 0.183433333  |
| NTM          | 0.334466667  | 0.039733333  | -0.264933333 | 0.530633333  | 0.483733333  |
| HS3ST3A1     | -0.0201      | -0.2156      | 0.023066667  | 0.2242       | 0.281233333  |
| LOC100131336 | -0.0109      | -0.0349      | -0.292133333 | 0.247        | 0.3788       |
| F2RL2        | -0.534066667 | -0.5741      | -0.3937      | 0.001866667  | -0.107233333 |
| PODXL        | -0.4269      | -0.4344      | -0.031133333 | 0.049333333  | -0.0667      |
| NCRNA00152   | 0.083366667  | 0.227        | -0.243566667 | 0.552133333  | 0.5664       |
| FAM55C       | -0.3917      | -0.3494      | -0.1661      | 0.144033333  | 0.116933333  |
| NGLY1        | -0.559733333 | -0.121766667 | -0.196       | 0.1197       | 0.096766667  |
| SNORA12      | -0.503133333 | -0.620266667 | -0.232366667 | 0.0881       | 0.115        |
| CXorf40B     | -0.045033333 | -0.1635      | -0.458466667 | 0.3623       | 0.300633333  |
| B4GALT5      | -0.1257      | -0.430566667 | -0.229666667 | 0.272566667  | -0.0055      |
| SLC35F2      | 0.151033333  | -0.219433333 | -0.079366667 | 0.440066667  | 0.2949       |
| MFN1         | -0.412833333 | -0.058766667 | -0.1433      | 0.067466667  | 0.2486       |
| VPS37A       | -0.036766667 | -0.2727      | -0.332166667 | 0.333166667  | 0.076566667  |
| SH2B3        | -0.197       | -0.085       | 0.302833333  | 0.180133333  | 0.357133333  |
| TNIP1        | -0.501233333 | -0.331266667 | -0.179433333 | 0.126033333  | 0.089533333  |
| MAP2K3       | 0.054633333  | -0.070233333 | -0.257766667 | 0.429966667  | 0.266166667  |
| B3GNT5       | -0.148566667 | -0.236       | -0.0506      | 0.280133333  | 0.3505       |
| IMPDH1       | -0.0007      | -0.287733333 | -0.263666667 | 0.266366667  | 0.296966667  |
| GARNL4       | -0.140233333 | -0.154733333 | -0.196733333 | 0.194066667  | 0.296366667  |
| LOC728650    | -0.3829      | -0.551666667 | -0.378466667 | -0.247966667 | 0.1483       |
| NLRP2        | -0.331366667 | -0.174       | -0.1965      | 0.111266667  | 0.1856       |
| APOBEC3F     | -0.073933333 | 0.177566667  | 0.385033333  | 0.247266667  | 0.5773       |
| UQCC         | -0.0881      | -0.233433333 | -0.165566667 | 0.322866667  | 0.238033333  |
| IL7R         | 0.265        | 0.0103       | -0.234966667 | 0.933333333  | 0.3595       |
| LOC441019    | -0.146266667 | 0.042633333  | 0.154766667  | 0.435166667  | 0.489566667  |
| PARP8        | -0.0302      | -0.394466667 | -0.273       | 0.2888       | 0.140433333  |



|              |              |              |              |              |              |
|--------------|--------------|--------------|--------------|--------------|--------------|
| VEGFC        | -0.079266667 | 0.207233333  | 0.565966667  | 0.605866667  | 0.572233333  |
| PSMA1        | -0.110666667 | -0.0779      | -0.197733333 | 0.3193       | 0.227833333  |
| SPG20        | -0.2296      | -0.153333333 | -0.190966667 | 0.210933333  | 0.2051       |
| RAP1GAP      | -0.411333333 | -0.341933333 | -0.432833333 | -0.102833333 | 0.011866667  |
| SEC62        | -0.144       | -0.262566667 | -0.1937      | 0.1585       | 0.2547       |
| CT45A5       | -0.269033333 | 0.075333333  | -0.344866667 | 0.279833333  | 0.3193       |
| FUT8         | -0.2543      | -0.1191      | 0.167433333  | 0.0024       | 0.321966667  |
| ZNF212       | -0.1741      | -0.112       | -0.252866667 | 0.2643       | 0.159        |
| SDHAP2       | -0.259266667 | -0.284       | -0.218766667 | 0.2216       | 0.0757       |
| TMEM158      | 0.145766667  | -0.4065      | 0.224166667  | 0.277366667  | 0.283333333  |
| TPST1        | 0.000666667  | -0.317366667 | -0.3487      | 0.295933333  | 0.1029       |
| HIATL1       | 0.080333333  | -0.187233333 | -0.3055      | 0.218666667  | 0.2456       |
| LOC344887    | -0.215466667 | -0.182733333 | -0.1914      | 0.3569       | 0.262066667  |
| C3orf52      | 0.0339       | -0.167866667 | -0.364233333 | 0.3618       | 0.189866667  |
| C3orf59      | 0.249        | -0.028066667 | -0.076733333 | 0.4996       | 0.35         |
| SUSD2        | -0.3758      | -0.2732      | -0.169466667 | 0.1325       | 0.2092       |
| DUSP3        | -0.592266667 | -0.475033333 | -0.160166667 | -0.057666667 | -0.048466667 |
| NFE2L3       | -0.149433333 | -0.042366667 | -0.042133333 | 0.307333333  | 0.408833333  |
| RPL35A       | -0.2404      | -0.3329      | -0.220166667 | 0.1461       | 0.111866667  |
| HIST1H1C     | -0.304433333 | -0.174733333 | -0.335166667 | 0.145333333  | 0.154633333  |
| SLC16A5      | -0.699566667 | -0.309433333 | -0.1464      | -0.193166667 | -0.076366667 |
| FTHL12       | -0.580366667 | -0.3254      | -0.1901      | -0.194166667 | 0.041233333  |
| TXNRD1       | -0.087766667 | -0.263966667 | -0.6124      | 0.217633333  | 0.029433333  |
| KPNA4        | 0.0589       | -0.1086      | -0.262133333 | 0.463533333  | 0.2933       |
| CCM2         | -0.2795      | -0.1336      | -0.166733333 | 0.032633333  | 0.316466667  |
| PLSCR1       | -0.108233333 | -0.203833333 | -0.245233333 | 0.211266667  | 0.178066667  |
| TMEM45A      | -0.2679      | -0.3355      | 0.0102       | 0.580433333  | 0.235833333  |
| RIOK3        | -0.442333333 | -0.407266667 | -0.620566667 | 0.0919       | -0.226333333 |
| ERCC6        | -0.266533333 | -0.054433333 | -0.173266667 | 0.176566667  | 0.4024       |
| TMEM175      | -0.550933333 | -0.456766667 | -0.128266667 | -0.176933333 | 0.086866667  |
| LDLR         | -0.325366667 | 0.016066667  | 0.6029       | 0.061666667  | 0.5422       |
| PPTC7        | -0.172666667 | -0.265633333 | -0.0957      | 0.310333333  | 0.0401       |
| RIC8A        | -0.143166667 | -0.210966667 | -0.303433333 | 0.274466667  | 0.1198       |
| TSPAN10      | -0.6756      | -0.420333333 | -0.199133333 | -0.208966667 | 0.059466667  |
| PANX2        | -0.345533333 | -0.377766667 | -0.534733333 | -0.027533333 | 0.050033333  |
| ZNF812       | -0.156333333 | -0.2911      | -0.2708      | 0.181233333  | 0.162666667  |
| LOC100129550 | -0.4625      | -0.517466667 | -0.196333333 | -0.035866667 | -0.039133333 |
| SLC25A25     | 0.321        | -0.230566667 | -0.318766667 | 0.470633333  | 0.161833333  |
| MON1B        | -0.2144      | -0.3559      | -0.2429      | 0.073733333  | 0.1238       |
| RFC3         | 0.326733333  | -0.1677      | -0.411066667 | 0.5168       | 0.121166667  |
| PSAP         | -0.4255      | -0.4485      | -0.202266667 | -0.070633333 | 0.0045       |
| SBDS         | -0.113366667 | -0.143133333 | -0.3124      | 0.2599       | 0.2545       |
| GNPDA1       | -0.3375      | -0.4828      | -0.3546      | 0.0054       | -0.0544      |
| NEXN         | 0.320433333  | -0.12        | -0.666733333 | 0.7264       | 0.100233333  |
| CTSL1        | -0.209633333 | -0.3388      | -0.276966667 | 0.060366667  | 0.1337       |
| PLS1         | -0.115866667 | -0.072733333 | -0.022966667 | 0.259533333  | 0.394633333  |
| ATP6VOC      | -0.174266667 | -0.201066667 | -0.154166667 | 0.122233333  | 0.274233333  |

|           |              |              |              |              |              |
|-----------|--------------|--------------|--------------|--------------|--------------|
| LOC791120 | -0.495166667 | -0.383833333 | -0.391466667 | -0.190433333 | 0.007866667  |
| MPPE1     | -0.5182      | -0.395566667 | -0.338866667 | -0.246533333 | 0.060566667  |
| ASTE1     | -0.2731      | -0.093266667 | -0.299866667 | 0.1647       | 0.0825       |
| LOC642477 | 0.006966667  | -0.248433333 | -0.115133333 | 0.319366667  | 0.2799       |
| C12orf24  | 0.0499       | -0.1184      | -0.086733333 | 0.4013       | 0.286533333  |
| NCAPG2    | 0.083133333  | -0.143033333 | -0.424533333 | 0.298466667  | 0.1551       |
| TFG       | 0.006433333  | -0.248633333 | -0.195633333 | 0.258033333  | 0.280033333  |
| TMEM47    | -0.650633333 | -0.789433333 | -0.596333333 | -0.391533333 | -0.2453      |
| TMEM51    | -0.1804      | -0.375766667 | -0.343733333 | 0.2149       | -0.050166667 |
| EAF2      | -0.096833333 | -0.2543      | -0.217966667 | 0.187033333  | 0.2689       |
| TNFRSF14  | -0.662166667 | -0.386233333 | -0.125533333 | -0.1587      | 0.0064       |
| PLEKHA2   | -0.592066667 | -0.252933333 | -0.0323      | -0.102833333 | 0.078033333  |
| HIST1H4H  | -0.352133333 | -0.224766667 | -0.227533333 | 0.0686       | 0.210733333  |
| DNAJB9    | -0.3775      | -0.303066667 | -0.0574      | -0.080266667 | 0.193033333  |
| LOC646476 | -0.118766667 | -0.066533333 | -0.2868      | 0.269366667  | 0.208233333  |
| SLC41A3   | -0.3965      | -0.3679      | -0.2463      | 0.003633333  | 0.0206       |
| P15RS     | -0.354133333 | -0.250633333 | -0.098133333 | 0.083033333  | 0.0827       |
| NHLRC3    | -0.4052      | -0.453733333 | -0.273333333 | -0.095066667 | -0.0658      |
| SYNJ2     | -0.0135      | 0.053566667  | -0.033566667 | 0.2033       | 0.4054       |
| GLRX      | -0.419566667 | -0.265       | 0.099166667  | 0.0424       | 0.240666667  |
| AXUD1     | 0.254466667  | 0.0631       | -0.123333333 | 0.608466667  | 0.3488       |
| TMEM55A   | -0.191466667 | -0.373666667 | -0.059033333 | 0.204566667  | 0.1029       |
| PUS3      | -0.210333333 | -0.2154      | -0.413633333 | 0.180966667  | 0.0023       |
| WWC1      | 0.208466667  | -0.2009      | -0.3561      | 0.5882       | 0.3722       |
| SPP1      | -0.556366667 | -0.475966667 | 0.0306       | -0.287233333 | 0.039866667  |
| SRPRB     | -0.058766667 | -0.2854      | -0.3334      | 0.220833333  | 0.134766667  |
| IL13RA1   | -0.359733333 | -0.513233333 | -0.245533333 | -0.0513      | -0.0797      |
| TNFRSF10B | -0.1273      | -0.0864      | -0.152933333 | 0.194666667  | 0.278533333  |
| RPRD1A    | -0.133666667 | -0.267633333 | -0.201933333 | 0.0787       | 0.2111       |
| ITPR3     | -0.2586      | -0.302633333 | -0.0803      | 0.1491       | 0.142033333  |
| IL1B      | -0.5446      | -0.4189      | 0.316533333  | -0.2974      | 0.255266667  |
| LOC651143 | -0.0396      | -0.016933333 | -0.115666667 | 0.434066667  | 0.3134       |
| CRY1      | 0.2522       | -0.0595      | -0.135133333 | 0.657966667  | 0.224933333  |
| LOC132241 | -0.225033333 | -0.144033333 | -0.321433333 | -0.024566667 | 0.3131       |
| C13orf7   | -0.099466667 | 0.0064       | -0.3737      | 0.2676       | 0.311433333  |
| BCAP29    | 0.1223       | -0.1097      | -0.234833333 | 0.385733333  | 0.310166667  |
| MRPS31    | -0.245033333 | -0.057066667 | -0.248533333 | 0.137133333  | 0.262066667  |
| LOC285735 | -0.361033333 | 0.195733333  | 0.606766667  | -0.1206      | 0.6416       |
| TICAM1    | 0.0311       | -0.175766667 | -0.147066667 | 0.487133333  | 0.115733333  |
| RCN1      | -0.3496      | -0.322433333 | -0.120933333 | 0.110066667  | 0.027133333  |
| CCDC15    | 0.0496       | -0.057233333 | -0.313766667 | 0.296033333  | 0.240266667  |
| C17orf68  | -0.269866667 | -0.145933333 | -0.133433333 | 0.0449       | 0.2016       |
| C17orf91  | -0.1148      | -0.175533333 | -0.487866667 | 0.236166667  | 0.193566667  |
| GAR1      | 0.0804       | 0.0379       | -0.169033333 | 0.421233333  | 0.313833333  |
| CYP27B1   | -0.3868      | -0.1558      | -0.107133333 | 0.145933333  | 0.171433333  |
| CT45A4    | -0.024433333 | -0.269333333 | -0.3247      | 0.2004       | 0.145533333  |
| LOC399965 | 0.041066667  | 0.140733333  | -0.049033333 | 0.460266667  | 0.5015       |

|              |              |              |              |              |              |
|--------------|--------------|--------------|--------------|--------------|--------------|
| IER5         | 0.2454       | -0.107866667 | -0.130366667 | 0.531666667  | 0.242233333  |
| JUN          | 0.109233333  | -0.686333333 | -0.909733333 | 0.235333333  | -0.51        |
| ZNF716       | -0.191366667 | -0.054233333 | -0.295833333 | 0.229666667  | 0.240133333  |
| LOC647349    | 0.0135       | -0.192066667 | -0.118033333 | 0.367633333  | 0.187        |
| LOC653496    | 0.009333333  | -0.1593      | -0.122766667 | 0.342333333  | 0.390066667  |
| PCGF1        | -0.416933333 | -0.294933333 | -0.225866667 | 0.027666667  | -0.0651      |
| LOC644743    | -0.315733333 | -0.106466667 | 0.0932       | 0.1616       | 0.352        |
| KBTBD9       | -0.236066667 | -0.194933333 | -0.0548      | 0.2095       | 0.227566667  |
| MAGEA10      | -0.555966667 | -0.253566667 | -0.116       | -0.1323      | 0.2268       |
| KLHL21       | 0.109433333  | -0.281       | -0.404533333 | 0.339066667  | 0.003733333  |
| E2F6         | -0.010766667 | -0.0852      | -0.2762      | 0.312266667  | 0.2013       |
| TMEM9B       | -0.308066667 | -0.179466667 | -0.3351      | 0.039866667  | 0.087566667  |
| C10orf47     | -0.012966667 | -0.1448      | -0.2965      | 0.325233333  | 0.2671       |
| GYPC         | -0.463       | -0.228133333 | -0.004466667 | 0.023666667  | 0.1615       |
| TOM1L1       | -0.193066667 | -0.397933333 | -0.2641      | 0.1419       | -0.0212      |
| UBE2E2       | -0.237366667 | -0.338133333 | -0.201733333 | 0.0804       | 0.188033333  |
| PLEKHB2      | -0.160166667 | -0.0101      | -0.130966667 | 0.342766667  | 0.351133333  |
| KLHL24       | -0.405566667 | -0.6516      | -0.230933333 | -0.112833333 | -0.0074      |
| ANXA8        | -0.3089      | -0.283633333 | -0.345533333 | 0.290433333  | -0.026633333 |
| ATG12        | -0.066733333 | -0.318333333 | -0.133933333 | 0.274        | 0.142433333  |
| PARP14       | -0.502733333 | -0.3136      | -0.0952      | -0.081866667 | -0.001533333 |
| FTHL16       | -0.9652      | -0.229       | -0.485566667 | -0.6228      | 0.186133333  |
| FAM62B       | -0.204733333 | -0.2528      | -0.2616      | 0.0753       | 0.063333333  |
| NAT13        | 0.060066667  | -0.246166667 | -0.430966667 | 0.291966667  | 0.2169       |
| GEM          | -0.138966667 | -0.258533333 | -0.1936      | 0.088466667  | 0.096233333  |
| FAM113B      | -0.153566667 | -0.093433333 | -0.1369      | 0.350133333  | 0.030633333  |
| LOC644132    | -0.1497      | -0.275233333 | -0.442733333 | 0.224366667  | -0.0308      |
| SULT1A3      | -0.256       | -0.4235      | -0.157666667 | -0.133466667 | 0.116233333  |
| CENTG3       | -0.078666667 | -0.271333333 | -0.0808      | 0.320433333  | 0.036766667  |
| SLC25A22     | -0.037466667 | -0.1588      | -0.3247      | 0.139        | 0.299533333  |
| DVL3         | 0.0307       | -0.264766667 | -0.276       | 0.2852       | 0.098866667  |
| FBXL11       | 0.0452       | -0.0913      | -0.072266667 | 0.525566667  | 0.259466667  |
| CPEB4        | 0.145566667  | -0.204533333 | -0.179066667 | 0.4037       | 0.1503       |
| SEC22A       | -0.287033333 | -0.1951      | -0.200666667 | 0.1328       | 0.173433333  |
| CDC42EP2     | 0.051966667  | 0.033766667  | 0.0618       | 0.470866667  | 0.326566667  |
| C3orf37      | 0.041        | -0.059066667 | -0.267566667 | 0.344033333  | 0.2842       |
| CHPF2        | -0.2305      | -0.349966667 | -0.316366667 | 0.075133333  | 0.0333       |
| FBXL7        | -0.344966667 | -0.265366667 | -0.274533333 | 0.0584       | 0.079066667  |
| CT45A1       | -0.025766667 | 0.063066667  | -0.391966667 | 0.285233333  | 0.4459       |
| RUSC2        | -0.0313      | -0.116466667 | -0.078266667 | 0.424633333  | 0.156466667  |
| LOC100132805 | -0.0916      | -0.1851      | -0.2718      | 0.253233333  | 0.116733333  |
| LRRC20       | -0.1576      | -0.209033333 | -0.189266667 | 0.0991       | 0.182466667  |
| RTCD1        | -0.471       | -0.061133333 | -0.214866667 | 0.055866667  | 0.1593       |
| LOC728188    | -0.096166667 | -0.2189      | 0.065666667  | 0.219633333  | 0.1659       |
| FLJ40504     | -0.078966667 | 0.233466667  | 0.128633333  | 0.407166667  | 0.5419       |
| MOBK12C      | -0.156933333 | -0.233433333 | -0.215366667 | 0.225266667  | 0.072166667  |
| LOC653820    | 0.1056       | 0.033966667  | -0.516566667 | 0.3869       | 0.199433333  |

|              |              |              |              |              |              |
|--------------|--------------|--------------|--------------|--------------|--------------|
| LOC399959    | -0.2285      | -0.1963      | 0.0267       | -0.1042      | 0.1587       |
| HGS          | -0.005566667 | -0.299766667 | -0.1944      | 0.2146       | 0.1569       |
| SULT1A4      | -0.370366667 | -0.5436      | -0.044466667 | -0.207433333 | 0.025866667  |
| DAGLB        | -0.302266667 | -0.1348      | -0.406766667 | 0.087666667  | 0.1674       |
| SLC25A28     | -0.0249      | -0.232033333 | -0.352966667 | 0.1944       | 0.142966667  |
| LOC650369    | -0.062466667 | -0.0779      | -0.075933333 | 0.411833333  | 0.163833333  |
| FAM18B       | -0.178466667 | -0.0306      | -0.2126      | 0.242733333  | 0.1846       |
| EIF1         | -0.0429      | -0.2015      | -0.455833333 | 0.2278       | 0.072366667  |
| MRPS18B      | -0.266366667 | -0.086366667 | -0.2449      | 0.110866667  | 0.215333333  |
| CDR2         | 0.041266667  | 0.012866667  | -0.108233333 | 0.5539       | 0.220866667  |
| MSL2         | -0.085466667 | -0.106966667 | -0.294933333 | 0.2064       | 0.173566667  |
| IFFO1        | -0.176633333 | -0.326866667 | -0.293466667 | 0.186833333  | -0.0051      |
| TBCCD1       | -0.0778      | -0.102633333 | -0.1867      | 0.163533333  | 0.295733333  |
| TOMM34       | -0.102166667 | -0.369733333 | -0.1439      | 0.231733333  | 0.168933333  |
| ZNF275       | -0.013966667 | -0.288533333 | -0.217533333 | 0.356666667  | 0.1109       |
| LOC729009    | -0.985766667 | -0.3641      | -0.342133333 | -0.557533333 | 0.0771       |
| LHFP         | -0.067966667 | -0.234333333 | -0.364933333 | 0.278733333  | 0.0018       |
| ADORA2B      | -0.2154      | -0.243666667 | -0.065066667 | 0.2705       | 0.097166667  |
| C11orf46     | -0.176033333 | -0.291233333 | -0.184666667 | 0.297233333  | 0.115033333  |
| LARP4        | -0.010466667 | -0.062433333 | -0.131733333 | 0.260666667  | 0.3478       |
| QTRTD1       | 0.0083       | -0.137733333 | -0.238366667 | 0.363533333  | 0.165566667  |
| AVPI1        | -0.0675      | -0.5353      | -0.501466667 | 0.086866667  | -0.0802      |
| TRMT1        | -0.0758      | -0.0537      | -0.2916      | 0.1506       | 0.328966667  |
| DUSP4        | 0.0643       | -0.334466667 | 0.0342       | 0.385166667  | 0.136466667  |
| UBXN7        | -0.262166667 | -0.1553      | -0.061966667 | 0.117866667  | 0.176533333  |
| C16orf48     | -0.199533333 | -0.111633333 | -0.236233333 | 0.099466667  | 0.258333333  |
| AKAP11       | -0.1793      | -0.308166667 | -0.029766667 | 0.011466667  | 0.269666667  |
| ZNF148       | -0.242733333 | -0.2778      | 0.014533333  | 0.3334       | 0.072366667  |
| BANF1        | 0.085366667  | -0.159366667 | -0.2104      | 0.263533333  | 0.235766667  |
| GABPB2       | 0.0867       | -0.0216      | -0.2826      | 0.411        | 0.260966667  |
| SEL1L3       | -0.614633333 | -0.566033333 | -0.045       | -0.3856      | -0.0044      |
| METTL11A     | -0.0054      | -0.110566667 | -0.155766667 | 0.253233333  | 0.333966667  |
| HIST1H2BJ    | 0.176933333  | -0.091166667 | -0.199866667 | 0.316833333  | 0.3737       |
| KIAA1345     | -0.139066667 | -0.228366667 | -0.240866667 | 0.271733333  | 0.106466667  |
| MGMT         | -0.5291      | -0.363633333 | -0.271       | -0.080366667 | -0.059466667 |
| PLD1         | -0.313466667 | -0.1841      | -0.058333333 | 0.073733333  | 0.1805       |
| NHP2L1       | 0.212366667  | -0.216366667 | -0.214266667 | 0.323133333  | 0.198933333  |
| PVT1         | -0.010833333 | -0.102366667 | -0.243933333 | 0.375        | 0.241433333  |
| ZNF792       | -0.128566667 | -0.1054      | 0.2027       | 0.2996       | 0.2817       |
| OSGIN2       | -0.0657      | -0.1653      | -0.155866667 | 0.317766667  | 0.1792       |
| ADAM15       | 0.073633333  | -0.370133333 | -0.255866667 | 0.213433333  | 0.038633333  |
| RAB11FIP5    | -0.113133333 | -0.298733333 | -0.242066667 | 0.294366667  | 0.0013       |
| LONRF1       | -0.020633333 | -0.4624      | -0.402533333 | 0.2108       | -0.0617      |
| ERMP1        | -0.292866667 | -0.268466667 | -0.233166667 | 0.012066667  | -0.012433333 |
| LOC642567    | -1.031166667 | -0.256766667 | -0.5102      | -0.763133333 | 0.179933333  |
| PLCL2        | -0.0031      | -0.0555      | -0.177466667 | 0.329966667  | 0.248966667  |
| LOC100132774 | 0.0381       | 0.012433333  | -0.456566667 | 0.186866667  | 0.385433333  |

|           |              |              |              |              |              |
|-----------|--------------|--------------|--------------|--------------|--------------|
| ZFAND2A   | -0.079433333 | -0.1353      | -0.4465      | 0.291233333  | 0.164466667  |
| FYCO1     | -0.318266667 | -0.2415      | -0.2192      | 0.0292       | 0.138233333  |
| CD81      | -0.1467      | -0.360733333 | -0.1661      | 0.1873       | 0.046066667  |
| EIF1AX    | -0.132933333 | -0.071166667 | -0.0425      | 0.254466667  | 0.333733333  |
| GLIPR1    | -0.1079      | -0.4513      | -0.1704      | 0.041733333  | 0.1133       |
| LOC643977 | -0.482966667 | -0.187633333 | -0.0384      | 0.055666667  | 0.2162       |
| VEGFA     | -0.3325      | -0.300333333 | -0.317866667 | 0.0487       | 0.031666667  |
| CD33      | -0.1556      | -0.199133333 | -0.445533333 | 0.151266667  | 0.024733333  |
| SCML1     | 0.204733333  | -0.299433333 | -0.0866      | 0.497866667  | 0.297233333  |
| TBC1D23   | -0.0559      | -0.229933333 | -0.125466667 | 0.4279       | 0.102633333  |
| DIABLO    | 0.029366667  | -0.1428      | -0.300366667 | 0.3393       | 0.077433333  |
| LOC390557 | -0.362033333 | -0.300866667 | -0.156733333 | 0.030933333  | 0.116633333  |
| CGI-96    | 0.143233333  | -0.022166667 | -0.2564      | 0.450233333  | 0.322633333  |
| TMEM199   | 0.043933333  | -0.0471      | -0.3505      | 0.252066667  | 0.196        |
| STXBP6    | -0.020033333 | -0.045133333 | -0.193366667 | 0.341733333  | 0.259166667  |
| LOC645969 | 0.168766667  | -0.112233333 | -0.126566667 | 0.3648       | 0.237833333  |
| LOC400879 | 0.0567       | -0.1514      | -0.153766667 | 0.390133333  | 0.207266667  |
| LOC652773 | 0.012166667  | -0.060633333 | -0.187333333 | 0.369966667  | 0.203633333  |
| POLA2     | -0.046266667 | 0.029733333  | -0.086233333 | 0.404833333  | 0.161733333  |
| VLDLR     | -0.549966667 | -0.489433333 | -0.114433333 | -0.327066667 | -0.041166667 |
| SDHALP1   | 0.039366667  | -0.061033333 | -0.401966667 | 0.3606       | 0.1125       |
| ZNF215    | 0.076        | -0.250466667 | -0.193433333 | 0.209933333  | 0.241266667  |
| USP36     | -0.141833333 | -0.0817      | -0.153266667 | 0.3908       | 0.035366667  |
| RRP8      | 0.113566667  | -0.1136      | -0.2258      | 0.329033333  | 0.258633333  |
| SLC9A1    | -0.0585      | -0.1358      | -0.221266667 | 0.1511       | 0.199933333  |
| ATP1B3    | 0.175466667  | -0.263666667 | -0.185333333 | 0.480766667  | 0.156933333  |
| CNBP      | -0.080366667 | -0.105066667 | -0.3062      | 0.211033333  | 0.198666667  |
| AFP       | 0.040066667  | -0.195466667 | -0.340866667 | 0.3245       | 0.175566667  |
| ANKRA2    | -0.649566667 | -0.294866667 | -0.2262      | -0.284633333 | 0.068633333  |
| SLC25A15  | 0.056533333  | -0.1419      | -0.3446      | 0.284433333  | 0.146633333  |
| NOTCH2NL  | 0.1485       | 0.056166667  | 0.057133333  | 0.3901       | 0.416066667  |
| NBL1      | 0.0125       | -0.0534      | -0.180133333 | 0.3647       | 0.160066667  |
| GRPEL1    | 0.194133333  | 0.0715       | -0.083933333 | 0.628333333  | 0.268666667  |
| COTL1     | -0.156633333 | 0.079033333  | -0.026033333 | 0.220766667  | 0.263666667  |
| FHL3      | -0.030766667 | -0.196766667 | -0.151033333 | 0.2726       | 0.1484       |
| B4GALT4   | -0.0193      | -0.3278      | -0.306133333 | 0.255733333  | 0.006966667  |
| TRAK1     | -0.362933333 | -0.348133333 | -0.189833333 | -0.036633333 | 0.170566667  |
| DHFRL1    | -0.536566667 | -0.189166667 | -0.265533333 | -0.239466667 | 0.208766667  |
| PIK3CB    | -0.078833333 | -0.167233333 | 0.0312       | 0.279633333  | 0.1839       |
| HPRT1     | -0.007566667 | -0.2268      | -0.121233333 | 0.270366667  | 0.1447       |
| RGS10     | -0.073466667 | -0.0595      | 0.107866667  | 0.2128       | 0.358333333  |
| FAS       | 0.100866667  | -0.054133333 | -0.378466667 | 0.384466667  | 0.278933333  |
| RDH5      | -0.168433333 | -0.307033333 | 0.036233333  | -0.044333333 | 0.193766667  |
| EID3      | -0.057166667 | -0.2827      | -0.2869      | 0.256166667  | 0.041166667  |
| MT2A      | 0.120733333  | 0.008966667  | -0.079333333 | 0.338733333  | 0.429233333  |
| DOCK10    | -0.1352      | -0.1679      | -0.244233333 | 0.123966667  | 0.268833333  |
| DHDDS     | -0.0467      | -0.232166667 | -0.169566667 | 0.1865       | 0.1012       |

|            |              |              |              |              |              |
|------------|--------------|--------------|--------------|--------------|--------------|
| IKBKG      | -0.172266667 | -0.369366667 | -0.245933333 | -0.0196      | 0.129166667  |
| ACOT9      | 0.0417       | -0.129966667 | -0.1664      | 0.334866667  | 0.216566667  |
| RNF220     | -0.069566667 | -0.073066667 | -0.143066667 | 0.303633333  | 0.1959       |
| NAP1L4     | -0.021933333 | -0.082833333 | -0.2175      | 0.2513       | 0.1495       |
| TNFSF9     | 0.033        | -0.109433333 | -0.373233333 | 0.260033333  | 0.215333333  |
| TLE1       | -0.103466667 | -0.156766667 | -0.167533333 | 0.3293       | 0.160566667  |
| LOC728006  | -0.408433333 | -0.204       | -0.109166667 | 0.030933333  | 0.088466667  |
| BMP4       | -0.235333333 | 0.065833333  | -0.154566667 | 0.297133333  | 0.2871       |
| SLC38A1    | -0.1432      | -0.1947      | -0.378033333 | 0.122033333  | 0.1035       |
| KIAA0564   | -0.0624      | -0.048       | -0.312433333 | 0.191533333  | 0.199266667  |
| C22orf25   | -0.240066667 | -0.421033333 | -0.255666667 | 0.1305       | -0.1005      |
| AP3S1      | -0.114866667 | -0.074933333 | -0.157566667 | 0.312433333  | 0.125566667  |
| TAF1D      | -0.443733333 | -0.093066667 | -0.2776      | 0.015033333  | 0.117533333  |
| GTF2E1     | 0.026433333  | -0.106433333 | -0.291433333 | 0.3481       | 0.1593       |
| JUNB       | -0.057066667 | -0.400733333 | 0.0079       | 0.4226       | 0.020966667  |
| KEAP1      | 0.048433333  | -0.244433333 | -0.3354      | 0.2008       | 0.051966667  |
| LOC643272  | 0.0125       | 0.281733333  | -0.091766667 | 0.3129       | 0.441433333  |
| MKRN2      | -0.082766667 | -0.162666667 | -0.254866667 | 0.288566667  | 0.141566667  |
| SERPINI1   | -0.286266667 | -0.462433333 | -0.234333333 | -0.008166667 | 0.0422       |
| SMPD1      | -0.475066667 | -0.380866667 | -0.2016      | -0.069266667 | -0.179133333 |
| GPRASP2    | -0.3181      | -0.319333333 | -0.158366667 | 0.021433333  | 0.1099       |
| RPUSD1     | 0.187433333  | -0.1253      | -0.327266667 | 0.361433333  | 0.0954       |
| TIMP2      | -0.322666667 | -0.361366667 | -0.1612      | 0.0667       | -0.058       |
| C11orf17   | -0.334166667 | -0.281333333 | -0.392266667 | -0.084333333 | 0.105366667  |
| NUDT15     | -0.000133333 | 0.0682       | -0.498233333 | 0.3289       | 0.307333333  |
| CCNL1      | 0.016333333  | 0.031833333  | -0.2714      | 0.436633333  | 0.1174       |
| TRIM11     | 0.009133333  | -0.072633333 | -0.124466667 | 0.4373       | 0.1765       |
| NRGN       | 0.0201       | 0.166433333  | -0.033233333 | 0.3239       | 0.325966667  |
| SLC35E4    | 0.075633333  | -0.1521      | -0.2413      | 0.384266667  | 0.204833333  |
| GSK3B      | -0.0139      | -0.242266667 | 0.0171       | 0.231766667  | 0.2229       |
| YRDC       | 0.1493       | -0.104366667 | -0.1787      | 0.4463       | 0.268233333  |
| C19orf21   | -0.196966667 | -0.0592      | -0.1521      | 0.2035       | 0.2193       |
| CCDC136    | -0.248933333 | -0.337533333 | -0.236733333 | 0.008066667  | 0.047466667  |
| SEC61A1    | -0.179866667 | -0.260566667 | -0.3675      | 0.0114       | 0.0545       |
| RUNX1      | 0.0738       | -0.309033333 | -0.507633333 | 0.1409       | 0.0059       |
| LOC653515  | -0.03        | -0.2095      | -0.403466667 | 0.1973       | 0.0719       |
| VPS25      | 0.068833333  | -0.1948      | -0.097233333 | 0.173333333  | 0.295666667  |
| MGST1      | -0.171933333 | -0.3445      | -0.207366667 | 0.037        | 0.1618       |
| TRIM68     | -0.169533333 | -0.2396      | -0.4538      | 0.1091       | 0.075166667  |
| ARPC1B     | -0.223233333 | -0.5132      | 0.015033333  | 0.0779       | -0.043866667 |
| LOC642755  | -0.303133333 | -0.258933333 | -0.021366667 | 0.170366667  | 0.021466667  |
| OR51B4     | -0.369266667 | -0.306566667 | -0.389166667 | -0.035933333 | 0.0658       |
| PHC3       | 0.058333333  | -0.2109      | -0.138533333 | 0.407733333  | 0.093633333  |
| LCMT1      | -0.1435      | -0.341833333 | -0.189933333 | 0.174233333  | 0.0839       |
| C5orf37    | -0.1081      | -0.041       | -0.225733333 | 0.2892       | 0.2036       |
| ZNHIT6     | 0.043666667  | -0.0892      | -0.146466667 | 0.435333333  | 0.227366667  |
| dJ341D10.1 | 0.140333333  | -0.1267      | -0.164933333 | 0.518666667  | 0.198033333  |

|            |              |              |              |              |              |
|------------|--------------|--------------|--------------|--------------|--------------|
| ST6GALNAC4 | -0.385166667 | -0.2678      | -0.096       | -0.029866667 | 0.059833333  |
| POLR3G     | 0.189033333  | -0.037566667 | -0.156933333 | 0.4897       | 0.151566667  |
| SNORA45    | 0.2184       | -0.161733333 | -0.3155      | 0.426966667  | 0.162766667  |
| C13orf27   | 0.119066667  | -0.0018      | -0.1946      | 0.294133333  | 0.2892       |
| C16orf87   | -0.145566667 | -0.2362      | -0.190233333 | 0.198433333  | 0.105133333  |
| SP110      | -0.457266667 | -0.0427      | -0.2148      | 0.060033333  | 0.0862       |
| TALDO1     | -0.429866667 | -0.3818      | -0.167033333 | -0.031666667 | -0.070366667 |
| SNRPC      | -0.1259      | -0.0504      | -0.2581      | 0.112033333  | 0.2635       |
| C9orf119   | -0.361333333 | -0.2065      | -0.1812      | -0.058533333 | 0.126133333  |
| NRIP3      | -0.0338      | -0.328933333 | -0.2983      | 0.170266667  | 0.008233333  |
| ZBTB25     | -0.1791      | -0.244633333 | -0.280466667 | 0.124633333  | -0.038366667 |
| XPOT       | -0.097566667 | -0.2986      | -0.357066667 | 0.080866667  | 0.092066667  |
| SELM       | -0.4454      | -0.363       | -0.086566667 | 0.009866667  | -0.132166667 |
| DEXI       | -0.3864      | -0.153833333 | -0.037933333 | 0.137033333  | 0.042233333  |
| REPS2      | -0.121666667 | -0.073466667 | -0.109666667 | 0.083666667  | 0.267666667  |
| LOC441455  | -0.3544      | -0.4234      | -0.1855      | -0.148066667 | 0.0129       |
| M6PRBP1    | -0.358       | -0.1356      | 0.022666667  | 0.057633333  | 0.241133333  |
| AURKAPS1   | -0.073433333 | -0.174333333 | -0.273966667 | 0.123966667  | 0.1145       |
| PPME1      | 0.025033333  | 0.014866667  | -0.321733333 | 0.4734       | 0.274733333  |
| C22orf28   | -0.0609      | 0.0736       | -0.084       | 0.467633333  | 0.2237       |
| IQCG       | -0.3781      | -0.2698      | -0.278133333 | -0.0355      | -0.0218      |
| ZCCHC9     | -0.244566667 | -0.314466667 | -0.287566667 | 0.058133333  | -0.0721      |
| ZBTB17     | -0.302366667 | -0.068966667 | -0.125733333 | 0.130933333  | 0.128566667  |
| IFI35      | -0.9258      | -0.3698      | 0.116933333  | -0.459133333 | -0.037766667 |
| LOC399491  | 0.065933333  | -0.071766667 | -0.243766667 | 0.342066667  | 0.262766667  |
| C20orf24   | -0.039166667 | -0.2394      | -0.3262      | 0.185666667  | 0.117033333  |
| HPS1       | -0.0828      | -0.211633333 | -0.1281      | 0.376433333  | 0.1244       |
| ABCC2      | -0.437966667 | -0.302633333 | -0.173333333 | -0.031566667 | 0.011766667  |
| SETD4      | -0.090866667 | -0.1235      | -0.296733333 | 0.147466667  | 0.2259       |
| SLC37A3    | -0.0488      | -0.14        | -0.1999      | 0.284333333  | 0.175566667  |
| EFHD2      | 0.134933333  | 0.088666667  | -0.014833333 | 0.343633333  | 0.330366667  |
| FNDC3A     | -0.273766667 | -0.193566667 | -0.046433333 | 0.102333333  | 0.2778       |
| INSIG2     | -0.383833333 | -0.2946      | -0.0456      | 0.008133333  | -0.019766667 |
| HSPA13     | -0.259266667 | -0.130033333 | -0.189833333 | 0.064533333  | 0.220433333  |
| LOC440160  | -0.140733333 | -0.315466667 | 0.018566667  | 0.064666667  | 0.186133333  |
| VAMP7      | -0.268666667 | -0.3671      | -0.378233333 | -0.028133333 | -0.0422      |
| PUS1       | -0.026033333 | -0.060966667 | -0.189733333 | 0.233833333  | 0.248266667  |
| LOC730994  | -0.4997      | -0.310966667 | -0.1821      | 0.031333333  | -0.0256      |
| DCUN1D3    | -0.1558      | -0.136566667 | -0.0278      | 0.1235       | 0.2297       |
| CLDN20     | -0.0615      | -0.180566667 | -0.0313      | 0.2865       | 0.023366667  |
| ZMYM6      | -0.606266667 | -0.340466667 | -0.0487      | -0.189333333 | 0.104466667  |
| ASAP1      | 0.093366667  | -0.116233333 | -0.0182      | 0.4922       | 0.274966667  |
| CCDC58     | 0.100133333  | -0.027033333 | -0.4469      | 0.3083       | 0.207666667  |
| SH2D5      | 0.106233333  | -0.259833333 | -0.134766667 | 0.423266667  | 0.2393       |
| ACOX2      | -0.326066667 | -0.065366667 | 0.1467       | -0.0199      | 0.388966667  |
| FLJ10374   | 0.006466667  | -0.006766667 | -0.1696      | 0.390266667  | 0.2883       |
| RG9MTD1    | -0.1874      | -0.030966667 | -0.167866667 | 0.174733333  | 0.195766667  |

|           |              |              |              |              |              |
|-----------|--------------|--------------|--------------|--------------|--------------|
| MED19     | -0.236966667 | -0.142966667 | -0.185566667 | 0.152766667  | 0.1151       |
| SMC4      | 0.014033333  | 0.014633333  | 0.105633333  | 0.527833333  | 0.3176       |
| PTRH2     | -0.070033333 | -0.034466667 | -0.209833333 | 0.325        | 0.130166667  |
| APOBEC3B  | 0.308266667  | -0.098633333 | -0.189633333 | 0.521666667  | 0.2957       |
| SRXN1     | 0.377833333  | -0.1909      | -0.4593      | 0.526533333  | 0.0423       |
| LCOR      | -0.094866667 | -0.137866667 | -0.1209      | 0.1157       | 0.186366667  |
| LARP1B    | 0.162733333  | -0.089266667 | -0.2006      | 0.378666667  | 0.248233333  |
| CHSY3     | -0.0406      | -0.093666667 | -0.075166667 | 0.210266667  | 0.203733333  |
| NSFL1C    | 0.029466667  | -0.180333333 | -0.273066667 | 0.347133333  | 0.1278       |
| HPS5      | -0.2225      | -0.1325      | -0.138633333 | 0.3228       | 0.0722       |
| MET       | -0.120233333 | 0.039566667  | -0.0658      | 0.1243       | 0.3445       |
| NOC4L     | -0.0356      | -0.006033333 | -0.263733333 | 0.339666667  | 0.157366667  |
| MST4      | 0.1027       | -0.260066667 | -0.074       | 0.375866667  | 0.2373       |
| MAPK9     | -0.0406      | -0.228766667 | -0.194733333 | 0.1389       | 0.104966667  |
| ACO2      | -0.405433333 | -0.2496      | -0.241233333 | 0.0616       | -0.0179      |
| FTSJD1    | 0.101466667  | -0.1945      | -0.099433333 | 0.3074       | 0.2302       |
| SYT15     | -0.129066667 | -0.097233333 | -0.109733333 | 0.1704       | 0.1852       |
| GTF2H1    | -0.2835      | -0.274433333 | -0.181666667 | 0.025033333  | 0.205233333  |
| C9orf89   | -0.168233333 | -0.230666667 | 0.094433333  | 0.1205       | 0.097966667  |
| BDH1      | -0.1024      | -0.2333      | -0.253266667 | 0.1544       | 0.1123       |
| CDV3      | 0.1992       | -0.117333333 | -0.424733333 | 0.350566667  | 0.134933333  |
| NUFIP1    | -0.126333333 | -0.259966667 | -0.1374      | 0.137        | 0.122733333  |
| MLLT11    | -0.120866667 | -0.250566667 | -0.1953      | 0.1351       | 0.120766667  |
| HSPH1     | 0.009433333  | 0.010833333  | -0.179833333 | 0.277133333  | 0.365733333  |
| FAM18B2   | -0.044166667 | -0.047733333 | -0.0428      | 0.3015       | 0.189266667  |
| TMED4     | -0.475466667 | -0.445566667 | -0.0139      | 0.018066667  | -0.040266667 |
| LOC647942 | 0.342633333  | -0.163566667 | -0.171933333 | 0.716333333  | 0.151866667  |
| TRAPPC3   | -0.135533333 | -0.1914      | -0.1632      | 0.2229       | 0.065933333  |
| RAB2A     | -0.2297      | -0.053533333 | -0.2438      | 0.1921       | 0.118933333  |
| RPRC1     | -0.049       | -0.064233333 | -0.004033333 | 0.383266667  | 0.290666667  |
| NSUN5     | -0.0982      | -0.177766667 | -0.185233333 | 0.070366667  | 0.132533333  |
| ATG16L1   | 0.124133333  | -0.173066667 | -0.217566667 | 0.237033333  | 0.215266667  |
| MVP       | -0.836366667 | -0.5651      | 0.205366667  | -0.3797      | -0.021733333 |
| ASPH      | 0.018166667  | -0.293366667 | -0.0666      | 0.2907       | 0.095966667  |
| ZNF789    | -0.249766667 | -0.131866667 | -0.227133333 | 0.063333333  | 0.088533333  |
| BCCIP     | 0.12         | -0.012266667 | -0.311566667 | 0.2617       | 0.191433333  |
| DICER1    | -0.090433333 | -0.077033333 | -0.1669      | 0.112866667  | 0.279566667  |
| AK2       | 0.004866667  | -0.0465      | -0.158866667 | 0.311966667  | 0.317266667  |
| DAP       | -0.1317      | -0.1322      | 0.364566667  | 0.265866667  | 0.106        |
| KPNA1     | -0.051033333 | -0.086933333 | -0.102366667 | 0.149566667  | 0.254766667  |
| C9orf30   | -0.035333333 | -0.224866667 | -0.198933333 | 0.167933333  | 0.2158       |
| SLC30A5   | -0.096666667 | -0.220933333 | -0.282733333 | 0.078433333  | 0.187633333  |
| UBE2D4    | -0.1125      | -0.138133333 | -0.369833333 | 0.126766667  | 0.164033333  |
| LOC644640 | -0.3709      | -0.3666      | -0.037233333 | -0.096166667 | 0.026033333  |
| CMC1      | -0.129933333 | -0.216066667 | -0.239766667 | 0.1105       | 0.145133333  |
| PMS2L3    | -0.0103      | -0.1733      | -0.2432      | 0.243266667  | 0.112233333  |
| SBDSP     | 0.325733333  | -0.123166667 | -0.259366667 | 0.450766667  | 0.2404       |



|              |              |              |              |              |              |
|--------------|--------------|--------------|--------------|--------------|--------------|
| NUP50        | 0.194533333  | -0.117533333 | -0.165166667 | 0.346733333  | 0.156166667  |
| TOX2         | -0.311433333 | -0.199266667 | 0.415833333  | -0.0363      | 0.2429       |
| FNIP1        | -0.235166667 | -0.276833333 | -0.283666667 | 0.133066667  | -0.0103      |
| NCL          | 0.2818       | -0.075266667 | -0.324866667 | 0.429166667  | 0.0878       |
| INPP1        | -0.0189      | -0.140466667 | -0.2069      | 0.219633333  | 0.2196       |
| TRPV2        | -0.3995      | -0.152866667 | 0.352833333  | -0.028533333 | 0.2308       |
| ESD          | -0.362766667 | -0.147566667 | -0.152533333 | 0.0587       | 0.121133333  |
| LOC650898    | -0.272766667 | -0.201966667 | -0.109466667 | 0.0685       | 0.105066667  |
| HMMR         | -0.029333333 | 0.0169       | 0.036733333  | 0.4546       | 0.254033333  |
| ZNF485       | -0.159933333 | -0.000266667 | -0.173966667 | 0.161466667  | 0.260533333  |
| TLR4         | -0.149766667 | 0.133533333  | 0.125866667  | 0.126866667  | 0.340466667  |
| PFN2         | -0.224133333 | -0.2843      | -0.0883      | 0.1363       | 0.177666667  |
| GPKOW        | -0.024066667 | -0.170933333 | -0.238166667 | 0.336866667  | 0.2523       |
| IGF2BP3      | -0.0952      | -0.2085      | 0.328766667  | 0.158366667  | 0.309766667  |
| HSPA4L       | 0.026966667  | -0.019566667 | -0.301433333 | 0.249333333  | 0.265333333  |
| LRRC58       | 0.066466667  | -0.2427      | -0.217266667 | 0.301233333  | 0.276066667  |
| GTF2F2       | -0.2041      | -0.198733333 | -0.328233333 | 0.021366667  | 0.118766667  |
| LOC654103    | -0.1341      | -0.1146      | 0.0813       | 0.051733333  | 0.262433333  |
| QSOX2        | 0.070866667  | -0.171833333 | -0.175033333 | 0.294866667  | 0.181466667  |
| ESRRAP2      | -0.196366667 | -0.093533333 | -0.178466667 | 0.062        | 0.1762       |
| MRFAP1L1     | -0.165933333 | -0.191866667 | -0.153166667 | 0.143133333  | 0.160366667  |
| ZFAND2B      | -0.3087      | -0.288666667 | -0.2631      | -0.019766667 | 0.027433333  |
| UROD         | -0.4731      | -0.1959      | -0.0425      | 0.012533333  | 0.0791       |
| SLC25A36     | -0.305833333 | -0.330166667 | -0.0908      | 0.110433333  | -0.013333333 |
| TRMT2B       | -0.060333333 | -0.304333333 | -0.154033333 | 0.108866667  | 0.227466667  |
| ISY1         | -0.102033333 | -0.069       | -0.151433333 | 0.187766667  | 0.2554       |
| LOC645236    | 0.057433333  | 0.018066667  | -0.038066667 | 0.352033333  | 0.2864       |
| SIPA1        | -0.1738      | -0.060166667 | -0.017233333 | -0.032966667 | 0.247833333  |
| SGMS2        | -0.072033333 | -0.161433333 | -0.202266667 | 0.108666667  | 0.189333333  |
| ATP13A3      | -0.0699      | -0.198166667 | -0.0792      | 0.0425       | 0.178133333  |
| LOC169834    | -0.0602      | 0.0469       | -0.317833333 | 0.167966667  | 0.31         |
| C18orf19     | 0.081366667  | -0.222766667 | -0.2109      | 0.306933333  | 0.102233333  |
| LOC100129673 | -0.0927      | -0.0701      | -0.1825      | -0.011166667 | 0.413733333  |
| PTCD1        | -0.234366667 | -0.070433333 | -0.189766667 | 0.081233333  | 0.210333333  |
| DIS3         | 0.055933333  | -0.254566667 | -0.3919      | 0.178        | 0.059666667  |
| LOC646786    | -0.295733333 | -0.227966667 | -0.1629      | 0.0652       | 0.092066667  |
| WDR74        | 0.104333333  | -0.2916      | -0.3483      | 0.295166667  | 0.2004       |
| TMEM99       | -0.201233333 | -0.0091      | -0.4395      | 0.002766667  | 0.185666667  |
| KDELC1       | 0.1195       | 0.018033333  | -0.185833333 | 0.422266667  | 0.222233333  |
| PLEKHA9      | -0.197       | -0.048366667 | -0.065066667 | 0.0244       | 0.2944       |
| TSC22D2      | -0.088466667 | -0.4834      | -0.103366667 | 0.201233333  | 0.214966667  |
| ZNF622       | -0.273666667 | -0.139033333 | -0.272       | 0.056566667  | 0.102233333  |
| LOC648390    | -0.1362      | -0.171633333 | -0.059266667 | 0.1219       | 0.229866667  |
| ABCB9        | -0.385533333 | -0.3324      | -0.3789      | 0.0774       | -0.180233333 |
| KCNG1        | -0.1201      | -0.264533333 | -0.534166667 | -0.051766667 | 0.105033333  |
| SLC2A10      | -0.3133      | -0.2884      | 0.0279       | -0.1232      | 0.060266667  |
| LOC493869    | -0.485266667 | -0.343866667 | -0.314566667 | -0.147033333 | 0.019633333  |

|              |              |              |              |              |              |
|--------------|--------------|--------------|--------------|--------------|--------------|
| DSE          | -0.2826      | -0.359133333 | -0.041366667 | 0.098333333  | 0.150766667  |
| LTBP2        | -0.003466667 | -0.161566667 | 0.105966667  | 0.1602       | 0.2562       |
| MRPL17       | -0.0057      | -0.2038      | -0.060566667 | 0.124666667  | 0.215733333  |
| ZFP62        | -0.070033333 | -0.2408      | -0.209833333 | 0.2468       | 0.079633333  |
| GRB14        | -0.0602      | -0.159166667 | -0.1179      | 0.0792       | 0.2214       |
| LOC339804    | -0.403633333 | -0.1654      | -0.324266667 | -0.0281      | 0.0855       |
| LOC642469    | 0.0815       | -0.142233333 | -0.2697      | 0.166266667  | 0.179533333  |
| LIN28B       | -0.0637      | 0.0922       | -0.0051      | 0.378733333  | 0.217533333  |
| FTHL11       | -1.070666667 | -0.329266667 | -0.381833333 | -0.654333333 | -0.1507      |
| IL1RAPL1     | -0.261533333 | -0.0222      | -0.078066667 | -0.031466667 | 0.180933333  |
| FAM72B       | 0.1011       | 0.1015       | -0.120566667 | 0.437133333  | 0.314533333  |
| HNRNPAB      | 0.292133333  | -0.1936      | -0.298666667 | 0.3006       | 0.173466667  |
| VEZT         | -0.2338      | -0.254966667 | -0.154833333 | 0.144333333  | 0.0693       |
| MTAP         | -0.0529      | 0.004666667  | 0.032166667  | 0.146933333  | 0.222433333  |
| TSPAN14      | -0.0859      | 0.0153       | 0.276466667  | 0.088633333  | 0.354166667  |
| UCN          | -0.5008      | -0.2828      | -0.176066667 | -0.104066667 | -0.000366667 |
| VCAN         | -0.438066667 | -0.135433333 | -0.0017      | -0.0441      | 0.139233333  |
| ANGPTL4      | -0.358533333 | -0.536433333 | 0.802166667  | 0.253933333  | 0.355466667  |
| PUS7         | 0.081566667  | -0.0603      | -0.110566667 | 0.335166667  | 0.256333333  |
| LOC124512    | -0.4521      | -0.301666667 | -0.242       | -0.150033333 | 0.084333333  |
| LOC728115    | -0.111833333 | 0.0267       | -0.1055      | 0.3308       | 0.2021       |
| RNF7         | -0.271833333 | -0.182766667 | -0.1894      | 0.133733333  | 0.0435       |
| BTN2A1       | 0.0549       | -0.089266667 | -0.171466667 | 0.3928       | 0.170233333  |
| LOC100129195 | -0.449733333 | -0.124533333 | -0.287866667 | -0.204333333 | 0.0201       |
| KIAA1524     | 0.225533333  | -0.035766667 | -0.157533333 | 0.446266667  | 0.1784       |
| ELL          | 0.010466667  | -0.019833333 | -0.190833333 | 0.340133333  | 0.239766667  |
| ARIH2        | -0.195966667 | -0.2007      | -0.154966667 | 0.061866667  | 0.060366667  |
| CLIP1        | -0.2685      | -0.480233333 | -0.264833333 | 0.0274       | -0.0466      |
| C3orf26      | -0.072066667 | -0.0134      | -0.393866667 | 0.260966667  | 0.145133333  |
| C11orf82     | 0.193933333  | -0.0127      | -0.333133333 | 0.393733333  | 0.192666667  |
| LOC728138    | -0.020933333 | -0.1297      | 0.0314       | 0.1434       | 0.3364       |
| SFXN4        | 0.0637       | -0.138766667 | -0.338966667 | 0.254466667  | 0.119733333  |
| SRGAP1       | 0.0016       | -0.146266667 | -0.0816      | 0.246966667  | 0.183933333  |
| RRP9         | 0.151466667  | -0.283       | -0.289133333 | 0.199066667  | 0.1247       |
| KRT15        | -0.347833333 | -0.071633333 | -0.204633333 | -0.131033333 | 0.237633333  |
| POFUT2       | -0.3271      | -0.3931      | -0.083533333 | -0.0687      | 0.0028       |
| PTPN12       | 0.047833333  | -0.000933333 | 0.0745       | 0.360866667  | 0.259666667  |
| KRT18P13     | 0.049733333  | 0.132533333  | 0.1415       | 0.473033333  | 0.439966667  |
| PHACTR1      | -0.268166667 | -0.458833333 | -0.332133333 | -0.1978      | -0.0735      |
| COQ10B       | -0.026366667 | -0.110433333 | -0.215733333 | 0.250333333  | 0.143866667  |
| WDR47        | 0.161666667  | -0.0698      | -0.306866667 | 0.3468       | 0.119066667  |
| FAM102A      | -0.417166667 | -0.189566667 | -0.196166667 | -0.1197      | 0.069366667  |
| TSGA14       | -0.160933333 | 0.076066667  | -0.056066667 | 0.1674       | 0.2634       |
| AKIRIN1      | -0.125566667 | -0.1988      | -0.006133333 | 0.2888       | 0.133233333  |
| EBPL         | -0.093433333 | -0.256633333 | -0.001366667 | 0.102166667  | 0.233833333  |
| DDB2         | -0.1481      | -0.086866667 | -0.225233333 | 0.140933333  | 0.137933333  |
| TRIP6        | -0.195733333 | -0.184233333 | -0.184233333 | 0.1482       | 0.126233333  |

|                |              |              |              |              |              |
|----------------|--------------|--------------|--------------|--------------|--------------|
| PPAPDC1B       | -0.285333333 | -0.2849      | -0.167366667 | 0.062533333  | 0.104766667  |
| ARL9           | -0.187533333 | -0.373566667 | -0.1912      | 0.093033333  | -0.0172      |
| ICK            | -0.222133333 | -0.1098      | -0.111966667 | 0.013433333  | 0.1551       |
| MORN4          | -0.341633333 | -0.362566667 | -0.222166667 | -0.049333333 | -0.034733333 |
| STARD3NL       | 0.0262       | -0.025933333 | -0.112866667 | 0.223533333  | 0.2555       |
| TSKU           | -0.0716      | -0.363833333 | -0.0652      | 0.156        | 0.047733333  |
| MAD2L1BP       | 0.101933333  | -0.0955      | -0.1588      | 0.3873       | 0.1059       |
| AKR1B10        | -0.3912      | -0.373466667 | -0.294933333 | -0.083466667 | 0.088        |
| FAM60A         | -0.107566667 | -0.076866667 | -0.0119      | 0.389766667  | 0.0962       |
| CC2D1B         | -0.0631      | -0.2521      | -0.268766667 | 0.038133333  | 0.113533333  |
| CAB39L         | -0.1794      | -0.293933333 | -0.044466667 | -0.016233333 | 0.216333333  |
| FLJ45248       | -0.1527      | -0.264666667 | 0.0238       | -0.079366667 | 0.191866667  |
| ZBTB38         | 0.0369       | 0.013733333  | -0.218633333 | 0.3146       | 0.2337       |
| C17orf95       | -0.278233333 | -0.221866667 | -0.179966667 | -0.002       | -0.007233333 |
| KRT18P17       | -0.146433333 | 0.117166667  | -0.072433333 | 0.288633333  | 0.427966667  |
| C9orf5         | -0.224566667 | -0.2535      | -0.100433333 | 0.028166667  | 0.012466667  |
| PSMB6          | -0.170533333 | -0.0193      | -0.039833333 | 0.266533333  | 0.29         |
| RNF149         | -0.1501      | -0.408933333 | -0.0788      | 0.045266667  | 0.104366667  |
| DBR1           | 0.141566667  | -0.0972      | -0.173966667 | 0.42         | 0.098266667  |
| CASP4          | -0.250633333 | -0.257533333 | -0.260633333 | -0.018466667 | 0.0369       |
| THOP1          | -0.041633333 | -0.0885      | -0.123066667 | 0.275433333  | 0.156466667  |
| RANGAP1        | -0.0146      | 0.091766667  | -0.2525      | 0.234566667  | 0.2536       |
| SLC31A2        | -0.084       | -0.151866667 | -0.2419      | 0.180766667  | 0.058733333  |
| LOC645553      | -0.542266667 | -0.2506      | -0.302366667 | -0.2789      | 0.019566667  |
| ALAS1          | -0.074       | -0.083066667 | -0.068833333 | 0.250166667  | 0.190366667  |
| OAS2           | -0.341266667 | -0.3169      | -0.096166667 | -0.1466      | 0.084        |
| TMEM206        | -0.140566667 | -0.190133333 | -0.300633333 | 0.289666667  | -0.039666667 |
| TOPBP1         | 0.050333333  | -0.168866667 | -0.1589      | 0.151266667  | 0.152466667  |
| SLC25A37       | -0.019433333 | -0.158066667 | -0.106       | 0.216433333  | 0.135633333  |
| LOC643668      | 0.179033333  | 0.117833333  | -0.2811      | 0.4429       | 0.371066667  |
| CLK1           | 0.126166667  | -0.0956      | -0.006533333 | 0.478333333  | 0.066766667  |
| BNIP3L         | -0.407833333 | -0.142666667 | 0.101133333  | 0.070166667  | 0.2014       |
| LOC338579      | -0.055166667 | -0.046666667 | -0.0797      | 0.228333333  | 0.258266667  |
| LOC402560      | -0.219666667 | -0.2814      | -0.360066667 | 0.0169       | -0.0184      |
| MTHFD2L        | -0.142633333 | -0.287266667 | -0.1042      | 0.0874       | 0.118866667  |
| GGNBP2         | -0.267       | -0.1669      | -0.2928      | 0.008533333  | 0.036133333  |
| KIAA0194       | -0.1158      | -0.0729      | -0.274266667 | 0.144666667  | 0.093333333  |
| BNIP1          | 0.066566667  | 0.0376       | -0.105166667 | 0.405        | 0.427933333  |
| PCDH20         | -0.388066667 | -0.292466667 | 0.007833333  | -0.049       | 0.099233333  |
| MT1X           | -0.0337      | -0.302266667 | -0.244933333 | 0.217933333  | 0.153666667  |
| DKFZp686O24166 | -0.032633333 | -0.204166667 | -0.301533333 | 0.162266667  | -0.052066667 |
| LOC440345      | -0.1731      | -0.1478      | -0.2625      | 0.146933333  | -0.025966667 |
| WBSCR27        | -0.457333333 | -0.415166667 | 0.088833333  | -0.202366667 | 0.063433333  |
| ADPRHL2        | 0.089533333  | -0.0381      | -0.3249      | 0.202433333  | 0.282633333  |
| LDB2           | -0.420433333 | 0.020366667  | 0.154066667  | -0.167133333 | 0.275866667  |
| CD82           | -0.1032      | -0.2281      | -0.149566667 | 0.076566667  | 0.167566667  |
| LOC399940      | -0.1569      | -0.051033333 | -0.132366667 | -0.0379      | 0.090033333  |

|              |              |              |              |              |              |
|--------------|--------------|--------------|--------------|--------------|--------------|
| FASTKD2      | -0.016633333 | -0.072833333 | -0.205533333 | 0.264966667  | 0.189366667  |
| COPG         | -0.411966667 | -0.2195      | -0.124033333 | -0.1423      | 0.028566667  |
| MOSPD1       | -0.306566667 | -0.2379      | -0.2848      | 0.095233333  | 0.0029       |
| ITGB4BP      | -0.057566667 | -0.2522      | -0.134       | 0.151366667  | 0.194133333  |
| RPP21        | -0.109633333 | -0.231333333 | -0.230333333 | 0.1384       | 0.0748       |
| PPP2R2D      | -0.040766667 | 0.008566667  | -0.150233333 | 0.206633333  | 0.146466667  |
| FRAG1        | -0.177366667 | -0.142366667 | -0.3776      | 0.084233333  | 0.111933333  |
| LOC644423    | -0.0167      | -0.172633333 | -0.152866667 | 0.2545       | 0.028766667  |
| CHCHD6       | -0.3034      | -0.324033333 | -0.1023      | 0.005933333  | 0.055566667  |
| MT1A         | 0.017233333  | -0.003666667 | -0.006933333 | 0.2995       | 0.250766667  |
| MPP4         | 0.3796       | -0.082133333 | -0.401366667 | 0.1242       | 0.297266667  |
| CHCHD4       | 0.111033333  | -0.160766667 | -0.406366667 | 0.2226       | 0.127666667  |
| LOC731365    | -0.081733333 | -0.2163      | -0.1485      | 0.135366667  | 0.141333333  |
| FICD         | -0.1775      | -0.327066667 | -0.160266667 | -0.0906      | 0.074066667  |
| TUBA1A       | 0.0988       | -0.2047      | -0.019566667 | 0.358266667  | 0.214333333  |
| STX7         | -0.352233333 | -0.0993      | -0.164133333 | -0.039066667 | 0.0597       |
| C14orf135    | 0.2116       | -0.034566667 | -0.076066667 | 0.528566667  | 0.165566667  |
| TUBG1        | 0.036566667  | -0.207833333 | 0.134266667  | 0.294066667  | 0.186833333  |
| HIST2H2AA3   | -0.7242      | -0.4699      | 0.135133333  | 0.0764       | 0.012633333  |
| SPOCD1       | -0.411366667 | -0.247666667 | -0.091733333 | -0.210666667 | 0.107733333  |
| GOLM1        | 0.0641       | -0.1705      | -0.152833333 | 0.4101       | 0.1356       |
| RNF114       | -0.046666667 | -0.2475      | -0.248166667 | 0.219333333  | -0.026233333 |
| LOC100134393 | -0.0157      | -0.112733333 | -0.048466667 | 0.2647       | 0.2366       |
| LOC650832    | 0.015666667  | 0.019233333  | -0.142866667 | 0.327233333  | 0.198766667  |
| GUSBL2       | -0.173566667 | -0.1973      | -0.1369      | 0.103066667  | 0.0986       |
| ZNFX1        | -0.1688      | -0.358       | 0.0855       | 0.1611       | -0.0167      |
| ZBTB11       | -0.183266667 | -0.192033333 | -0.039966667 | 0.111466667  | 0.3412       |
| CLDN12       | -0.294333333 | -0.411033333 | -0.2104      | -0.13        | 0.0776       |
| RPL22L1      | -0.1411      | -0.0596      | -0.278833333 | 0.173966667  | 0.104766667  |
| CDC37        | 0.025733333  | -0.171666667 | -0.251466667 | 0.159266667  | 0.1853       |
| PHLDA2       | 0.228866667  | -0.066033333 | -0.028166667 | 0.2396       | 0.335233333  |
| C16orf57     | -0.020433333 | 0.021666667  | -0.253133333 | 0.1231       | 0.222333333  |
| NFKB1        | -0.129666667 | -0.0759      | 0.025333333  | 0.1274       | 0.2293       |
| LOC642956    | 0.336733333  | -0.097166667 | -0.670966667 | 0.215366667  | 0.155933333  |
| SPRYD5       | -0.345966667 | -0.098       | -0.0056      | -0.0659      | 0.0621       |
| PLK1         | -0.070066667 | 0.012333333  | 0.0731       | 0.440766667  | 0.176333333  |
| TRIM38       | -0.415066667 | -0.162866667 | -0.052833333 | -0.005066667 | 0.034566667  |
| PLXNA1       | 0.106033333  | -0.096233333 | -0.1048      | 0.286433333  | 0.132266667  |
| C21orf91     | -0.127066667 | -0.031033333 | -0.211533333 | 0.152666667  | 0.0919       |
| FABP5L2      | 0.2341       | 0.184133333  | -0.381033333 | 0.444433333  | 0.302033333  |
| SFRS10       | -0.063633333 | 0.012866667  | -0.1244      | 0.1067       | 0.3286       |
| SLC7A6OS     | 0.0221       | -0.167       | -0.1038      | 0.329766667  | 0.1637       |
| DGKA         | -0.336033333 | -0.278133333 | 0.015333333  | -0.019033333 | -0.033366667 |
| HIST2H4A     | -0.454433333 | -0.2695      | -0.004433333 | -0.001       | 0.045033333  |
| MPP6         | 0.272733333  | -0.019333333 | -0.169166667 | 0.513666667  | 0.2433       |
| ANKRD39      | 0.187066667  | -0.0498      | -0.122833333 | 0.4339       | 0.171066667  |
| LOC643624    | 0.042633333  | -0.039066667 | -0.3356      | 0.2109       | 0.1311       |

|              |              |              |              |              |              |
|--------------|--------------|--------------|--------------|--------------|--------------|
| PDE4A        | -0.2387      | -0.208766667 | -0.091433333 | 0.085633333  | 0.101933333  |
| C20orf72     | 0.206033333  | -0.143366667 | -0.251466667 | 0.253466667  | 0.1467       |
| LOC732007    | 0.1918       | -0.077766667 | 0.0506       | 0.297566667  | 0.2912       |
| ZNF282       | -0.076       | -0.095566667 | -0.0753      | 0.236166667  | 0.065433333  |
| DPH5         | -0.336933333 | -0.4133      | -0.1228      | -0.0918      | 0.097666667  |
| LOC100134537 | -0.250433333 | -0.339533333 | -0.008866667 | -0.006733333 | 0.0518       |
| CD46         | -0.4255      | -0.004566667 | -0.358366667 | 0.1173       | -0.0341      |
| ATR          | -0.045633333 | -0.135866667 | -0.183166667 | 0.199366667  | 0.126366667  |
| GMPPA        | -0.380733333 | -0.310966667 | -0.044833333 | -0.0909      | 0.050033333  |
| UHMK1        | -0.167833333 | -0.258333333 | 0.1018       | 0.092266667  | 0.326466667  |
| PIBF1        | -0.268166667 | 0.089566667  | -0.0386      | 0.127266667  | 0.251766667  |
| TXNL1        | -0.179533333 | 0.1113       | -0.336533333 | 0.212266667  | 0.2282       |
| APOBEC3D     | -0.3841      | -0.190666667 | 0.3136       | -0.077866667 | 0.201333333  |
| GULP1        | -0.197533333 | -0.182166667 | -0.302566667 | 0.1797       | -0.019366667 |
| ZNF438       | -0.054133333 | -0.1114      | -0.1451      | 0.1298       | 0.206533333  |
| PLEKHA3      | 0.135133333  | -0.087566667 | -0.1263      | 0.47         | 0.134866667  |
| ZMAT5        | -0.252533333 | -0.2845      | -0.0579      | -0.0157      | 0.167566667  |
| GABPB1       | -0.022333333 | 0.015166667  | -0.125533333 | 0.2991       | 0.201433333  |
| ZHX3         | -0.171566667 | -0.077933333 | 0.0283       | 0.2181       | 0.077566667  |
| ING2         | 0.1197       | -0.0315      | -0.139633333 | 0.4255       | 0.2254       |
| PICALM       | -0.020966667 | -0.076133333 | 0.107833333  | 0.369        | 0.104333333  |
| AHCTF1       | 0.343433333  | -0.1518      | -0.122733333 | 0.558233333  | 0.062        |
| CWC22        | -0.021866667 | -0.010033333 | -0.249566667 | 0.186933333  | 0.2648       |
| DUSP1        | -0.085633333 | -0.2319      | -0.296166667 | 0.315233333  | -0.1352      |
| TINF2        | -0.402766667 | -0.383766667 | -0.056433333 | -0.098733333 | -0.010533333 |
| C18orf8      | -0.012633333 | -0.1431      | -0.2975      | 0.124866667  | 0.046466667  |
| INTS10       | -0.196933333 | -0.235266667 | -0.1097      | 0.0722       | 0.0508       |
| PFKM         | -0.2479      | -0.129633333 | -0.095266667 | 0.0739       | 0.143        |
| LOC340598    | -0.004433333 | 0.124233333  | -0.045466667 | 0.4434       | 0.167466667  |
| MTPN         | -0.145866667 | -0.281666667 | -0.033233333 | 0.0121       | 0.1586       |
| LOC283953    | -0.377933333 | -0.331666667 | -0.113866667 | -0.101       | -0.015366667 |
| SLC30A1      | -0.078066667 | -0.157       | -0.2523      | -0.0564      | 0.154566667  |
| CLCF1        | 0.0759       | -0.332033333 | -0.243933333 | 0.109033333  | 0.040933333  |
| UBE2E1       | -0.066433333 | -0.169733333 | -0.105966667 | 0.317966667  | 0.116633333  |
| DNAJA1       | 0.084533333  | 0.063833333  | -0.119866667 | 0.320133333  | 0.294833333  |
| ABHD10       | -0.402233333 | -0.148566667 | -0.2409      | -0.0619      | -0.006966667 |
| MTIF2        | -0.098133333 | -0.160333333 | -0.263666667 | 0.160566667  | 0.121733333  |
| PARP3        | -0.4473      | -0.639066667 | 0.0279       | -0.136433333 | -0.1098      |
| CMAS         | -0.0698      | -0.0557      | -0.222733333 | 0.2106       | 0.062        |
| MCOLN2       | 0.112833333  | -0.306533333 | -0.195766667 | 0.2663       | 0.051433333  |
| RGS20        | -0.127133333 | -0.232333333 | -0.3013      | 0.0611       | 0.067566667  |
| ZNF643       | -0.2426      | -0.101533333 | -0.463133333 | 0.0066       | 0.077833333  |
| TAF12        | -0.2312      | -0.341333333 | -0.114833333 | -0.0246      | 0.085133333  |
| TNFAIP3      | -0.004833333 | -0.217233333 | 0.034266667  | 0.392766667  | 0.182533333  |
| C16orf80     | 0.066366667  | -0.012633333 | -0.021066667 | 0.460166667  | 0.152966667  |
| KTI12        | 0.1196       | -0.123533333 | -0.385       | 0.3053       | 0.0695       |
| MORF4L2      | -0.055433333 | -0.0465      | 0.0739       | 0.242333333  | 0.255366667  |

|           |              |              |              |              |              |
|-----------|--------------|--------------|--------------|--------------|--------------|
| ANXA2P1   | -0.384433333 | -0.1599      | -0.3659      | 0.032833333  | 0.036733333  |
| ABT1      | -0.0212      | -0.031933333 | -0.155066667 | 0.2198       | 0.1416       |
| LOC402175 | -0.2708      | -0.264466667 | -0.1718      | -0.0033      | -0.001533333 |
| CMBL      | -0.7895      | -0.259266667 | 0.053866667  | -0.255066667 | 0.061933333  |
| LAMA1     | -0.0792      | -0.098366667 | -0.0747      | 0.198533333  | 0.129666667  |
| C6orf136  | -0.0751      | -0.1358      | -0.0719      | 0.150133333  | 0.146933333  |
| TGOLN2    | -0.0135      | -0.382966667 | -0.187433333 | 0.1134       | -0.031533333 |
| C6orf66   | -0.050233333 | 0.1446       | -0.482566667 | 0.124533333  | 0.378266667  |
| UBE2A     | -0.0698      | -0.015733333 | -0.281633333 | 0.184533333  | 0.002333333  |
| PAFAH1B1  | -0.232166667 | -0.131433333 | -0.1395      | -0.008066667 | 0.109766667  |
| WFS1      | -0.3142      | -0.358866667 | -0.2851      | -0.029233333 | -0.032333333 |
| FGGY      | -0.510133333 | -0.308733333 | -0.0348      | -0.017433333 | -0.107466667 |
| CCDC34    | 0.041133333  | 0.006466667  | -0.3288      | 0.251266667  | 0.167533333  |
| NEIL2     | 0.014366667  | -0.133033333 | -0.173066667 | 0.279333333  | 0.161833333  |
| GYG1      | -0.210066667 | -0.1491      | -0.314066667 | 0.054566667  | 0.044133333  |
| TXNL2     | -0.070333333 | -0.0342      | -0.188466667 | 0.2512       | 0.106866667  |
| NCK1      | -0.165333333 | -0.314733333 | -0.083       | 0.066966667  | 0.049566667  |
| PSMA3     | 8.00E-04     | -0.086233333 | -0.1935      | 0.2779       | 0.197666667  |
| MCM2      | 0.2061       | -0.3223      | -0.224933333 | 0.280633333  | -0.020766667 |
| COPB2     | -0.398166667 | -0.257866667 | -0.101066667 | -0.071733333 | 0.0121       |
| MPHOSPH6  | -0.079333333 | 0.1435       | -0.194933333 | 0.2637       | 0.3138       |
| LOC401537 | -0.0117      | 0.130833333  | -0.339233333 | 0.357166667  | 0.318033333  |
| ZNF143    | 0.2148       | 0.0321       | -0.048233333 | 0.445966667  | 0.3422       |
| TXNRD2    | 0.244566667  | 0.078433333  | -0.542133333 | 0.398566667  | 0.253666667  |
| MGC87042  | -0.0121      | -0.0164      | -0.2214      | 0.119066667  | 0.367333333  |
| MAZ       | -0.2685      | -0.2427      | -0.244733333 | -0.081666667 | -0.0537      |
| PTPRM     | -0.493366667 | -0.376366667 | 0.000366667  | -0.164166667 | 0.004066667  |
| HMGB1L1   | 0.0027       | 0.008466667  | -0.1431      | 0.306        | 0.278066667  |
| STAT6     | -0.306833333 | -0.2948      | -0.0535      | -0.032633333 | 0.046566667  |
| LOC643856 | -0.062633333 | -0.126133333 | -0.276966667 | 0.223166667  | -0.0264      |
| DHPS      | -0.3351      | -0.028833333 | 0.0602       | 0.1326       | 0.121933333  |
| CXorf56   | -0.061433333 | -0.076033333 | -0.261433333 | 0.181833333  | 0.117666667  |
| LOC729217 | -0.139       | -0.1714      | 0.035666667  | 0.099866667  | 0.229366667  |
| FAM167A   | -0.0409      | -0.1928      | -0.3534      | 0.254533333  | 0.095033333  |
| SRP54     | -0.0986      | -0.1565      | -0.071766667 | 0.202466667  | 0.123766667  |
| CREB5     | -0.078666667 | -0.124333333 | -0.083566667 | 0.037466667  | 0.0873       |
| UTP14C    | -0.217966667 | -0.212333333 | -0.212833333 | 0.0966       | -0.002133333 |
| BAG3      | -0.190166667 | -0.115766667 | 0.188466667  | 0.163366667  | 0.221666667  |
| COG6      | -0.222033333 | -0.1003      | -0.140366667 | -0.051533333 | 0.111366667  |
| GTF2B     | -0.1183      | -0.0653      | -0.123066667 | 0.166833333  | 0.162866667  |
| WDR45L    | 0.204166667  | -0.1043      | -0.215566667 | 0.4383       | 0.0753       |
| PPM1M     | -0.584366667 | -0.285733333 | -0.0083      | -0.274166667 | 0.008833333  |
| PRKAG2    | -0.105733333 | -0.035366667 | -0.194433333 | 0.027833333  | 0.146066667  |
| PDDC1     | 0.056566667  | -0.153833333 | -0.162266667 | 0.107        | 0.203633333  |
| WDR43     | 0.392733333  | 0.060633333  | -0.079       | 0.6072       | 0.225966667  |
| BYSL      | 0.3048       | -0.045       | -0.402233333 | 0.3608       | 0.063933333  |
| TTL       | 0.0475       | -0.155166667 | -0.0913      | 0.109933333  | 0.1425       |

|              |              |              |              |              |              |
|--------------|--------------|--------------|--------------|--------------|--------------|
| TM2D1        | -0.268133333 | -0.307766667 | -0.008233333 | -0.0666      | 0.0237       |
| RNASET2      | -0.260466667 | -0.322166667 | -0.0282      | -0.1127      | 0.169566667  |
| CRADD        | -0.413033333 | -0.182733333 | -0.257733333 | -0.150166667 | 0.042433333  |
| RFWD3        | 0.085        | 0.0393       | -0.192133333 | 0.348366667  | 0.113866667  |
| DKK1         | 0.0633       | 0.3585       | -0.381766667 | 0.210033333  | 0.3955       |
| C13orf34     | -0.070833333 | 0.138233333  | -0.1594      | 0.2747       | 0.239466667  |
| C5orf41      | -0.586233333 | -0.347033333 | -0.084866667 | -0.092666667 | -0.138966667 |
| JAZF1        | -0.247733333 | -0.376466667 | -0.0214      | -0.0368      | 0.178866667  |
| RSU1         | 0.015933333  | -0.121133333 | -0.376066667 | 0.105066667  | 0.197366667  |
| PLA2G15      | -0.2726      | -0.171866667 | -0.2633      | 0.091766667  | -0.0827      |
| CPXM1        | -0.338666667 | -0.078333333 | -0.0352      | 0.002233333  | 0.2517       |
| ATP6V1E2     | -0.277733333 | -0.321333333 | -0.253366667 | -0.096333333 | -0.043833333 |
| MTCH1        | -0.0535      | -0.110466667 | -0.336966667 | 0.0706       | 0.0803       |
| DPF2         | -0.213066667 | -0.179733333 | -0.172666667 | 0.080933333  | 0.1384       |
| ARHGAP24     | -0.2257      | -0.078666667 | -0.127266667 | -0.026666667 | 0.097366667  |
| NIT2         | -0.282666667 | -0.0683      | -0.134066667 | 0.134666667  | 0.088233333  |
| PHRF1        | 0.287733333  | -0.121133333 | -0.2054      | 0.356966667  | 0.203566667  |
| CSDE1        | -0.138266667 | -0.139133333 | -0.1055      | 0.181633333  | 0.143166667  |
| GPN3         | 0.031266667  | -0.0698      | -0.2226      | 0.144866667  | 0.175066667  |
| PALLD        | -0.233033333 | -0.161933333 | -0.2815      | 0.0714       | 0.007766667  |
| KRT8         | -0.239233333 | -0.163733333 | 0.0555       | 0.136433333  | 0.212566667  |
| ATP6V1D      | -0.2152      | -0.080133333 | -0.247666667 | 0.031033333  | 0.069433333  |
| TMEM30A      | -0.230033333 | -0.074866667 | -0.074833333 | -0.007366667 | 0.284966667  |
| FAM39DP      | -0.301966667 | -0.105966667 | -0.1445      | -0.037666667 | 0.178933333  |
| CORO1C       | 0.214366667  | -0.061166667 | -0.2175      | 0.319066667  | 0.339066667  |
| LOC653778    | -0.171133333 | -0.135       | -0.0002      | 0.047666667  | 0.1279       |
| FRAS1        | 0.067966667  | -0.171566667 | -0.243033333 | 0.1926       | 0.2953       |
| LOC100128353 | -0.200966667 | -0.196766667 | -0.165766667 | 0.117        | 0.0627       |
| VCL          | -0.063733333 | 0.0632       | 0.0339       | 0.3036       | 0.2249       |
| DNPEP        | -0.147       | -0.106933333 | -0.2457      | 0.173766667  | 0.0179       |
| ARMCX6       | -0.203033333 | -0.285866667 | -0.249333333 | 0.058266667  | -0.0552      |
| HSPCAL3      | -0.153933333 | 0.6233       | -0.458866667 | 0.0566       | 0.939266667  |
| TMEM188      | -0.188266667 | -0.0574      | -0.024633333 | 0.085266667  | 0.1631       |
| ACYP1        | 0.223966667  | -0.0071      | -0.308633333 | 0.224633333  | 0.255966667  |
| YPEL5        | -0.643266667 | -0.401633333 | 0.03         | -0.0689      | -0.0946      |
| CRIM1        | 0.284966667  | 0.148666667  | -0.159666667 | 0.412833333  | 0.267033333  |
| RUVBL1       | 0.153766667  | -0.124166667 | -0.244066667 | 0.2471       | 0.231733333  |
| LOC647150    | -0.061266667 | 0.0521       | -0.1695      | 0.308433333  | 0.2413       |
| TCP1         | 0.159566667  | 0.105066667  | -0.2263      | 0.356233333  | 0.338866667  |
| PPP2R2A      | -0.068133333 | -0.179166667 | -0.138433333 | 0.178033333  | 0.097433333  |
| LOC644033    | -0.0139      | -0.063666667 | -0.390633333 | 0.224333333  | 0.139533333  |
| LOC100132510 | -0.1885      | -0.0233      | -0.043033333 | -0.0056      | 0.351133333  |
| RIOK1        | 0.030266667  | -0.004533333 | -0.116066667 | 0.369833333  | 0.196366667  |
| DNAJB1       | 0.236633333  | -0.207366667 | -0.0992      | 0.198266667  | 0.206        |
| MICB         | 0.111033333  | -0.156566667 | -0.246966667 | 0.239        | 0.202466667  |
| POP1         | 0.244366667  | 0.012666667  | -0.164533333 | 0.4782       | 0.169066667  |
| GIMAP2       | -0.376633333 | -0.310966667 | -0.0891      | -0.1281      | 0.112233333  |

|               |              |              |              |              |              |
|---------------|--------------|--------------|--------------|--------------|--------------|
| TADA2A        | -0.1096      | -0.078666667 | -0.251633333 | 0.0435       | 0.210366667  |
| AK3L1         | -0.079066667 | -0.205733333 | 0.0695       | 0.183633333  | 0.0925       |
| GSTM2         | -0.2476      | -0.2718      | -0.2012      | -0.019366667 | 0.0541       |
| LIMS1         | 0.001666667  | -0.235166667 | -0.163533333 | 0.252866667  | 0.183566667  |
| SGCE          | -0.3178      | -0.308133333 | -0.150633333 | -0.080133333 | -0.054366667 |
| PANX1         | 0.026433333  | -0.0933      | -0.1379      | 0.261        | 0.1115       |
| WBP2          | -0.478133333 | -0.267466667 | 0.033233333  | -0.0735      | -0.044766667 |
| DNASE2        | -0.607033333 | -0.539333333 | -0.289733333 | -0.359033333 | -0.236533333 |
| KIAA1026      | -0.0169      | -0.12        | -0.237366667 | 0.288933333  | 0.137        |
| PLOD1         | -0.237233333 | -0.187       | 0.0478       | 0.0353       | 0.062833333  |
| DKFZP564O0523 | -0.0231      | -0.171866667 | -0.158233333 | 0.204966667  | 0.0674       |
| SETDB2        | -0.3461      | -0.296533333 | -0.285033333 | -0.045633333 | 0.0511       |
| ZNF263        | 0.125033333  | -0.132066667 | -0.3362      | 0.273566667  | 0.043        |
| ITGB2         | 0.070366667  | -0.0325      | -0.149766667 | 0.422033333  | 0.2454       |
| LOC728934     | 0.0912       | -0.073333333 | 0.002366667  | 0.4482       | 0.083866667  |
| SKIL          | 0.1263       | 0.0374       | -0.1434      | 0.3527       | 0.212433333  |
| GTPBP8        | -0.2215      | 0.041266667  | -0.376566667 | 0.058866667  | 0.176566667  |
| MID1IP1       | -0.2774      | -0.174866667 | -0.279933333 | 0.003833333  | -0.046766667 |
| LOC100130561  | 0.152233333  | -0.089833333 | -0.121066667 | 0.4104       | 0.220166667  |
| ERLIN1        | 0.0316       | -0.148533333 | -0.1763      | 0.265533333  | 0.0429       |
| WDFY2         | -0.0112      | -0.0792      | -0.138666667 | 0.0661       | 0.232766667  |
| UPP1          | -0.056633333 | -0.0506      | -0.2194      | 0.166533333  | 0.043866667  |
| ZXDC          | -0.077166667 | -0.2607      | -0.206833333 | 0.065533333  | 0.0896       |
| MPRIP         | -0.049033333 | -0.0792      | 0.055566667  | 0.043433333  | 0.163266667  |
| KLHL29        | -0.0679      | -0.155166667 | -0.184       | 0.072666667  | 0.1408       |
| ZNF697        | -0.0574      | 0.002933333  | 0.0734       | 0.223533333  | 0.2586       |
| SAT1          | -0.168333333 | -0.214766667 | -0.128766667 | -0.004433333 | 0.005266667  |
| ELTD1         | 0.070966667  | 0.021433333  | -0.181066667 | 0.194266667  | 0.129766667  |
| CENPBD1       | -0.2566      | -0.2844      | -0.108866667 | -0.015       | 0.105533333  |
| LOC728564     | 0.050033333  | -0.009166667 | -0.156733333 | 0.354233333  | 0.034633333  |
| GFOD1         | 0.149833333  | -0.2318      | -0.4509      | 0.2836       | -0.054833333 |
| MTHFD2        | 0.068666667  | -0.305433333 | -0.519933333 | 0.115066667  | -0.042433333 |
| RXRB          | -0.257466667 | -0.2791      | -0.127266667 | -0.158033333 | 0.172966667  |
| ENOX2         | -0.172166667 | -0.117866667 | -0.255766667 | 0.0068       | 0.163633333  |
| CCDC22        | -0.107666667 | -0.0904      | -0.1041      | 0.109433333  | 0.163766667  |
| DCBLD2        | -0.169933333 | -0.093566667 | 0.1404       | -0.016366667 | 0.157133333  |
| CCT6A         | 0.066366667  | 0.019366667  | -0.0108      | 0.339066667  | 0.310133333  |
| UBE2J2        | 0.0299       | 0.0397       | -0.234266667 | 0.338333333  | 0.202333333  |
| CCRN4L        | 0.0081       | 0.049933333  | -0.1235      | 0.294033333  | 0.2916       |
| PLCB4         | -0.124533333 | 0.0263       | -0.083666667 | 0.245833333  | 0.250733333  |
| RBM33         | -0.248433333 | -0.000566667 | -0.056866667 | 0.133033333  | 0.153666667  |
| KRT18P28      | 0.096666667  | 0.245366667  | 0.072        | 0.4736       | 0.477233333  |
| DLG1          | -0.020566667 | -0.028333333 | -0.230233333 | 0.257966667  | 0.199333333  |
| PQBP1         | 0.1252       | -0.186       | -0.195533333 | 0.2465       | 0.2258       |
| CBFB          | 0.1224       | -0.0159      | -0.1498      | 0.3785       | 0.203933333  |
| WBSCR22       | 0.076633333  | -0.145633333 | -0.1665      | 0.192666667  | 0.1956       |
| ARL4C         | -0.160966667 | -0.091566667 | -0.079       | 0.045766667  | 0.040966667  |



|           |              |              |              |              |              |
|-----------|--------------|--------------|--------------|--------------|--------------|
| MANEAL    | -0.024466667 | -0.0839      | -0.1569      | 0.146666667  | 0.109666667  |
| C21orf7   | 0.012166667  | -0.048533333 | -0.204533333 | 0.2675       | 0.124233333  |
| GART      | 0.208966667  | -0.047666667 | -0.404333333 | 0.322866667  | 0.041166667  |
| CHURC1    | -0.373766667 | -0.187866667 | -0.220566667 | -0.025566667 | 0.0181       |
| LOC642031 | 0.3534       | -0.0044      | -0.3792      | 0.318233333  | 0.2077       |
| TMEM1     | 0.0371       | 0.006266667  | -0.182866667 | 0.215066667  | 0.1625       |
| AKR1B1    | -0.419566667 | -0.377933333 | -0.072933333 | -0.201733333 | -0.011366667 |
| ZNF703    | -0.0515      | -0.001233333 | -0.2918      | 0.272733333  | 0.121666667  |
| LOC441601 | -0.157666667 | -0.061133333 | -0.176233333 | -0.0464      | 0.140166667  |
| LOC647195 | -0.036266667 | -0.0519      | -0.205333333 | 0.108066667  | 0.262066667  |
| IER2      | 0.232366667  | -0.163033333 | 0.102033333  | 0.3893       | 0.060266667  |
| FLI1      | -0.029833333 | 0.075833333  | -0.005333333 | 0.124466667  | 0.266533333  |
| OSBPL1A   | -0.4581      | -0.3977      | -0.0017      | -0.078233333 | -0.0638      |
| LOC648716 | -0.137933333 | -0.137766667 | -0.0463      | 0.123766667  | 0.1528       |
| ATF1      | -0.018033333 | 0.215233333  | -0.3662      | 0.209166667  | 0.250633333  |
| TWF2      | -0.143733333 | -0.1371      | 0.105933333  | 0.0795       | 0.207133333  |
| IDS       | -0.083033333 | -0.133233333 | -0.2834      | 0.2148       | 0.0563       |
| EXT1      | 0.134066667  | 0.049566667  | -0.219366667 | 0.382633333  | 0.242866667  |
| PFKP      | -0.059666667 | -0.313566667 | 0.030233333  | 0.139133333  | 0.0287       |
| ANKRD49   | -0.1519      | -0.306066667 | -0.300266667 | 0.094333333  | -0.0924      |
| HOXB4     | -0.0335      | 0.1205       | -0.0575      | 0.425466667  | 0.1829       |
| LOC643446 | 0.290433333  | -0.008133333 | 0.0114       | 0.6083       | 0.159433333  |
| TMED9     | -0.182533333 | -0.100166667 | -0.242366667 | 0.146733333  | 0.148733333  |
| RCAN1     | 0.0406       | -0.506966667 | -0.055633333 | 0.029533333  | 0.0075       |
| ABHD11    | 0.008866667  | -0.1742      | -0.1179      | 0.4018       | 0.096        |
| ZNF398    | -0.066333333 | -0.212333333 | -0.3065      | 0.162        | 0.033633333  |
| EBNA1BP2  | 0.248633333  | -0.077733333 | -0.348366667 | 0.356666667  | 0.128233333  |
| DFNA5     | -0.5854      | -0.239333333 | 0.0384       | -0.222566667 | 0.029833333  |
| C10orf75  | -0.456366667 | -0.137733333 | 0.0038       | -0.152833333 | 0.038966667  |
| C5orf25   | 0.130566667  | -0.109433333 | -0.141466667 | 0.322766667  | 0.175366667  |
| USP38     | -0.028866667 | -0.145266667 | 0.024866667  | 0.3423       | 0.213766667  |
| TXNDC11   | 0.059533333  | -0.1648      | -0.202       | 0.116366667  | 0.1138       |
| LOC644214 | -0.1275      | -0.0027      | -0.1708      | 0.114        | 0.282866667  |
| MIDN      | 0.018666667  | -0.0123      | -0.119366667 | 0.242366667  | 0.088166667  |
| DUS3L     | 0.145733333  | -0.051166667 | -0.1949      | 0.391833333  | 0.229133333  |
| TMEM144   | -0.421433333 | -0.241933333 | -0.1149      | -0.134       | -0.040933333 |
| RNF182    | 0.2576       | 0.025933333  | -0.027566667 | 0.354133333  | 0.331066667  |
| UBE2G1    | 0.0239       | -0.013066667 | -0.099666667 | 0.3411       | 0.139666667  |
| KLHL2     | -0.047466667 | -0.1888      | -0.049366667 | 0.051566667  | 0.272866667  |
| SLC43A3   | 0.5992       | -0.0778      | -0.056366667 | 0.525533333  | 0.284433333  |
| CTSC      | 0.087466667  | -0.097733333 | -0.102066667 | 0.130166667  | 0.236733333  |
| STX16     | -0.445433333 | -0.3046      | -0.1462      | -0.318566667 | 0.006366667  |
| NDFIP2    | -0.164933333 | -0.058233333 | -0.033533333 | 0.079966667  | 0.263666667  |
| ZMYND8    | -0.2889      | -0.1455      | 0.128266667  | 0.1585       | 0.1109       |
| MAP4K2    | -0.3839      | -0.104533333 | 0.035533333  | -0.093066667 | 0.142766667  |
| WDR67     | -0.035566667 | -0.172033333 | -0.255566667 | 0.1276       | -0.000966667 |
| ACSL1     | -0.074966667 | -0.2412      | -0.7486      | -0.0365      | -0.013       |

|              |              |              |              |              |              |
|--------------|--------------|--------------|--------------|--------------|--------------|
| STX4         | -0.24066667  | -0.0185      | -0.336933333 | -0.094733333 | 0.043233333  |
| MED4         | 0.0126       | -0.1302      | -0.050466667 | 0.2971       | 0.145666667  |
| FTH1         | -0.699533333 | -0.207566667 | -0.063633333 | -0.39        | 0.183433333  |
| OBFC1        | -0.217266667 | -0.0843      | 0.2151       | 0.121566667  | 0.177733333  |
| FZD6         | -0.127433333 | -0.2933      | 0.032433333  | 0.103866667  | 0.128866667  |
| ZNF280C      | 0.094        | -0.1914      | -0.082466667 | 0.184266667  | 0.245566667  |
| BRD2         | -0.089366667 | -0.015133333 | -0.210933333 | 0.1859       | 0.079766667  |
| ZMYND19      | 0.522233333  | 0.049866667  | -0.032666667 | 0.672433333  | 0.279266667  |
| BTBD10       | -0.0431      | -0.104433333 | -0.188833333 | 0.220033333  | 0.041333333  |
| MSRA         | -0.1729      | -0.198733333 | -0.1501      | 0.070366667  | 0.074966667  |
| ATP6V1G1     | -0.1767      | -0.3371      | -0.179666667 | 0.093266667  | 0.000466667  |
| BLVRB        | -0.7261      | -0.321333333 | -0.1632      | -0.485       | 0.026733333  |
| TFDP2        | -0.156166667 | -0.3048      | -0.177133333 | 0.234566667  | -0.0186      |
| STAMBPL1     | 0.127066667  | -0.134866667 | -0.102133333 | 0.213466667  | 0.197433333  |
| C13orf1      | -0.109366667 | -0.070533333 | -0.249266667 | 0.100766667  | 0.129733333  |
| UBC          | -0.198266667 | -0.144133333 | -0.0862      | 0.1257       | 0.116366667  |
| SOX13        | -0.148466667 | -0.292966667 | -0.1113      | 0.004666667  | 0.0846       |
| SCG5         | -0.083766667 | -0.4761      | -0.8017      | 0.170933333  | -0.288866667 |
| BAD          | 0.057466667  | -0.141533333 | -0.164566667 | 0.260366667  | 0.115333333  |
| NARG1L       | 0.010433333  | 0.0079       | -0.0972      | 0.237466667  | 0.193733333  |
| PPFIA1       | -0.026233333 | -0.1289      | -0.0682      | 0.186266667  | 0.132833333  |
| ATP6V1C1     | -0.064033333 | -0.151533333 | -0.059633333 | 0.2431       | 0.1266       |
| EPRS         | -0.367333333 | -0.2471      | -0.230966667 | -0.078733333 | -0.083066667 |
| CCRK         | -0.275533333 | -0.1721      | -0.189933333 | -0.075733333 | 0.095266667  |
| PQLC2        | -0.179633333 | -0.1548      | -0.087433333 | 0.054833333  | 0.1666       |
| LOC728059    | 0.035133333  | 0.024333333  | -0.101733333 | 0.224466667  | 0.200533333  |
| COMMD2       | -0.077133333 | -0.155233333 | -0.2432      | 0.136766667  | 0.1054       |
| UBB          | -0.032466667 | -0.0113      | -0.073833333 | 0.175233333  | 0.2946       |
| C3orf58      | 0.0465       | -0.213933333 | -0.095233333 | 0.306933333  | 0.037633333  |
| RRP7A        | 0.024666667  | 0.0436       | -0.121566667 | 0.324766667  | 0.116466667  |
| NFE2L1       | -0.104666667 | -0.373466667 | -0.187366667 | 0.062933333  | -0.099666667 |
| LOC644869    | -0.1866      | -0.2735      | -0.246766667 | -0.069966667 | -0.0127      |
| LOC257396    | -0.0688      | -0.137166667 | -0.244333333 | 0.196        | 0.107066667  |
| LOC100130769 | 0.048766667  | -0.042066667 | -0.194733333 | 0.270166667  | 0.2034       |
| ZWINT        | 0.138933333  | -0.1368      | -0.160333333 | 0.2578       | 0.1269       |
| LYL1         | -0.122633333 | -0.123666667 | -0.094566667 | 0.118566667  | 0.055633333  |
| AP4B1        | 0.2888       | 0.053266667  | -0.268733333 | 0.376833333  | 0.298066667  |
| CYB561D1     | -0.346233333 | -0.3548      | -0.3253      | -0.1335      | -0.066233333 |
| LOC644422    | 0.082366667  | 0.0517       | -0.299933333 | 0.261133333  | 0.1336       |
| SLC12A4      | 0.0985       | -0.160133333 | -0.0542      | 0.212466667  | 0.1714       |
| TFPI         | -0.0158      | -0.2765      | 0.097633333  | 0.1188       | 0.153666667  |
| OXSM         | -0.189733333 | -0.133466667 | -0.262466667 | 0.105466667  | 0.016833333  |
| CNOT4        | -0.057433333 | -0.108633333 | -0.084933333 | 0.216833333  | 0.146633333  |
| LOC730535    | -0.140066667 | -0.026533333 | -0.009933333 | 0.190833333  | 0.3403       |
| MAFG         | 0.158666667  | -0.1684      | -0.304266667 | 0.305133333  | 0.1094       |
| SNX16        | -0.2174      | -0.460866667 | -0.0218      | -0.0371      | 0.0724       |
| ULBP2        | 0.009533333  | -0.199266667 | -0.2075      | 0.164666667  | 0.053033333  |

|           |              |              |              |              |              |
|-----------|--------------|--------------|--------------|--------------|--------------|
| RAP1BL    | -0.0707      | 0.028333333  | -0.228566667 | 0.2277       | 0.2272       |
| LOC650803 | 0.191066667  | -0.100966667 | -0.238933333 | 0.364933333  | 0.088333333  |
| SELI      | 0.088666667  | -0.091266667 | -0.1151      | 0.205266667  | 0.097033333  |
| MRPL43    | -0.0431      | -0.009366667 | -0.133266667 | 0.3305       | 0.127        |
| FABP5     | 0.229266667  | 0.1839       | -0.568833333 | 0.119733333  | 0.374833333  |
| LASS6     | -0.077266667 | 0.0301       | -0.0708      | 0.155633333  | 0.172933333  |
| INPP4B    | -0.0802      | 0.133366667  | -0.114233333 | 0.301133333  | 0.228733333  |
| PSMD5     | -0.070533333 | -0.274033333 | 0.117433333  | 0.1124       | 0.158466667  |
| FCRLB     | -0.233566667 | -0.0522      | 0.107133333  | -0.0132      | 0.3208       |
| ALDH1L2   | -0.3649      | -0.395433333 | -0.141233333 | -0.095266667 | 0.021733333  |
| LOC728098 | 0.158333333  | -0.0609      | -0.141566667 | 0.367133333  | 0.182733333  |
| C1orf163  | 0.125933333  | -0.0556      | -0.129433333 | 0.370133333  | 0.149833333  |
| FASTKD1   | -0.140233333 | -0.067966667 | -0.2091      | 0.1198       | 0.121733333  |
| LOC646750 | 0.157266667  | -0.102066667 | -0.2433      | 0.2685       | 0.1644       |
| MASTL     | 0.147233333  | -0.129733333 | -0.2199      | 0.282666667  | 0.014266667  |
| LYPLA1    | 0.026466667  | -0.027866667 | -0.160966667 | 0.121133333  | 0.2466       |
| TUB       | 0.069866667  | -0.178466667 | -0.274166667 | 0.111866667  | 0.150733333  |
| NUFIP2    | 0.047533333  | 0.006466667  | -0.2139      | 0.329066667  | 0.120333333  |
| TELO2     | -0.036333333 | 0.143233333  | 0.1125       | 0.461333333  | 0.072233333  |
| PHGDH     | -0.320133333 | -0.373233333 | -0.179533333 | -0.131433333 | -0.049333333 |
| GK5       | -0.216866667 | -0.079166667 | -0.033533333 | 0.0375       | 0.1291       |
| DGCR14    | 0.0248       | 0.039033333  | -0.212866667 | 0.243366667  | 0.191933333  |
| CEP170    | -0.184166667 | -0.027133333 | -0.014166667 | 0.1483       | 0.112733333  |
| KBTBD8    | 0.361533333  | -0.0693      | -0.1619      | 0.4622       | 0.288333333  |
| CDK5      | -0.3394      | -0.141033333 | 0.025533333  | -0.092033333 | -0.04        |
| KPNA3     | 0.081066667  | -0.189466667 | -0.1311      | 0.252266667  | 0.1437       |
| NFKB2     | 0.017033333  | -0.2808      | -0.097433333 | 0.156666667  | -0.032433333 |
| LOC345645 | -0.022833333 | -0.035833333 | -0.2902      | 0.1462       | 0.227766667  |
| MON1A     | -0.049833333 | 0.0063       | -0.2321      | 0.027566667  | 0.2616       |
| MT1G      | 0.009766667  | 0.2935       | -0.133166667 | 0.311033333  | 0.419933333  |
| CKAP4     | -0.1686      | -0.3748      | -0.1348      | -0.020433333 | -0.088233333 |
| AATF      | 0.0488       | 0.0157       | -0.180166667 | 0.307033333  | 0.1351       |
| POT1      | -0.015166667 | -0.0319      | -0.006533333 | 0.2867       | 0.059566667  |
| IL6ST     | -0.1134      | -0.229133333 | 0.1247       | 0.220266667  | 0.146866667  |
| SLBP      | 0.177766667  | -0.052033333 | -0.212533333 | 0.374266667  | 0.046433333  |
| EIF3D     | 0.050366667  | -0.2304      | -0.121366667 | 0.290533333  | -0.0168      |
| GFPT1     | -0.270166667 | -0.3019      | -0.211133333 | 0.003333333  | -0.0206      |
| MRPS34    | 0.059966667  | -0.1357      | -0.084266667 | 0.246866667  | 0.1335       |
| TAX1BP3   | -0.058133333 | -0.258966667 | -0.2954      | 0.155266667  | 0.053233333  |
| VGLL4     | -0.4153      | -0.353866667 | 0.204233333  | -0.047066667 | 0.0496       |
| FAM104A   | -0.1319      | -0.171466667 | -0.1651      | 0.113966667  | 0.009066667  |
| NIPA1     | -0.072       | -0.273933333 | -0.146766667 | 0.1067       | 0.0491       |
| XYLT2     | -0.241833333 | -0.272366667 | -0.001166667 | 0.006        | 0.0542       |
| KIAA1539  | -0.396866667 | -0.098       | 0.067133333  | -0.077733333 | 0.1108       |
| RNF128    | -0.2912      | -0.3305      | -0.012566667 | -0.070966667 | 0.0577       |
| SLC4A2    | -0.129133333 | -0.161933333 | -0.148366667 | -0.0712      | 0.1344       |
| TJAP1     | -0.136733333 | -0.135466667 | -0.1821      | 0.056033333  | 0.065466667  |

|           |              |              |              |              |              |
|-----------|--------------|--------------|--------------|--------------|--------------|
| SKP1      | 0.433433333  | -0.044266667 | -0.381866667 | 0.582366667  | 0.162766667  |
| GLS       | -0.215166667 | -0.226866667 | -0.135766667 | 0.044333333  | -0.043466667 |
| ARID3B    | 0.202266667  | 0.057833333  | -0.077333333 | 0.346466667  | 0.2874       |
| SNORA33   | 0.0433       | -0.005833333 | -0.3801      | 0.130833333  | 0.147766667  |
| DRAP1     | -0.039966667 | -0.162466667 | -0.110833333 | 0.123466667  | -0.006433333 |
| ACYP2     | -0.519833333 | -0.4534      | 0.056866667  | -0.1184      | -0.179633333 |
| ACAD9     | -0.099466667 | -0.1317      | -0.040833333 | 0.131166667  | 0.134433333  |
| ZBTB7B    | -0.1966      | -0.081866667 | -0.1887      | 0.082033333  | 0.0276       |
| KCNK1     | -0.2057      | -0.1307      | 0.021566667  | 0.117933333  | 0.237533333  |
| MOBK13    | 0.0903       | -0.117833333 | -0.0892      | 0.2406       | 0.178166667  |
| ZFAND1    | -0.348133333 | -0.220766667 | -0.234166667 | -0.079333333 | -0.0566      |
| DKC1      | 0.062166667  | -0.126366667 | -0.240066667 | 0.269666667  | 0.046166667  |
| LOC401233 | -0.240466667 | -0.274666667 | -0.071766667 | 0.1178       | 0.001333333  |
| TIMM9     | -0.018966667 | -0.085666667 | -0.116533333 | 0.2566       | 0.1544       |
| EIF4G2    | 0.362266667  | -0.149333333 | -0.139933333 | 0.316166667  | 0.1609       |
| ATP6V1A   | -0.331166667 | -0.243566667 | -0.157266667 | -0.140233333 | 0.097033333  |
| KIAA1731  | -0.214833333 | -0.0676      | -0.062866667 | 0.127266667  | 0.1349       |
| UBL3      | -0.329066667 | -0.1943      | -0.0965      | -0.090266667 | 0.0457       |
| LYSMD2    | 0.103766667  | -0.083033333 | -0.1545      | 0.1927       | 0.276233333  |
| MAP2K1IP1 | -0.180266667 | -0.201166667 | -0.270333333 | -0.008033333 | 0.012133333  |
| TAF1A     | 0.160766667  | 0.126        | -0.0689      | 0.304166667  | 0.258466667  |
| ZC3H15    | 0.047233333  | 0.0459       | -0.035066667 | 0.274266667  | 0.367966667  |
| ORC6L     | 0.359966667  | -0.0279      | -0.1655      | 0.5486       | 0.000933333  |
| LOC728457 | -0.311833333 | -0.2609      | -0.212733333 | -0.075       | -0.0604      |
| ANXA2P3   | -0.174966667 | -0.172966667 | -0.391933333 | -0.155033333 | 0.0907       |
| PRKCH     | -0.1861      | -0.0643      | 0.056266667  | 0.080933333  | 0.134666667  |
| GAK       | -0.033933333 | -0.116266667 | -0.155466667 | 0.026566667  | 0.2146       |
| TAP2      | 0.118933333  | -0.198666667 | -0.224633333 | 0.254366667  | 0.011533333  |
| CLIP4     | -0.530833333 | -0.4209      | -0.097033333 | -0.189666667 | -0.191833333 |
| TRIM23    | 0.0053       | -0.188866667 | -0.128466667 | 0.269333333  | 0.0799       |
| HHLA3     | -0.2384      | -0.339066667 | -0.090933333 | -0.052866667 | 0.033933333  |
| SGSH      | -0.060966667 | -0.431566667 | -0.171833333 | 0.127233333  | -0.1899      |
| ACTR3B    | 0.0125       | -0.072733333 | -0.1776      | 0.16         | 0.206466667  |
| C4orf34   | -0.621033333 | -0.2587      | 0.0685       | -0.223333333 | -0.052033333 |
| PES1      | 0.151733333  | -0.019566667 | -0.282966667 | 0.3195       | 0.1626       |
| SERPIN8   | 0.0339       | -0.0778      | -0.111366667 | 0.173366667  | 0.137366667  |
| XPO6      | 0.150133333  | -0.069466667 | -0.1422      | 0.205433333  | 0.067366667  |
| IKBIP     | -0.091966667 | 0.085833333  | -0.031933333 | 0.185866667  | 0.296566667  |
| TOMM70A   | -0.223233333 | 0.082666667  | -0.123233333 | 0.1152       | 0.162633333  |
| SUCLA2    | -0.1805      | -0.093366667 | -0.235733333 | -0.1484      | 0.2553       |
| ACSM3     | -0.090566667 | -0.163133333 | -0.1184      | 0.1025       | 0.1311       |
| HRH1      | -0.1528      | -0.108366667 | -0.236733333 | 0.123566667  | 0.0864       |
| MNX1      | 0.030466667  | -0.0893      | 0.018266667  | 0.284433333  | 0.155433333  |
| TNRC6B    | -0.272566667 | -0.237666667 | -0.028633333 | -0.2162      | 0.095133333  |
| NPDC1     | -0.2557      | -0.1556      | 0.038633333  | 0.144566667  | 0.070333333  |
| PNPO      | -0.2906      | -0.267266667 | -0.158233333 | -0.1089      | 0.132166667  |
| CCDC128   | -0.4794      | -0.406766667 | 0.042933333  | -0.262633333 | 0.066133333  |

|              |              |              |              |              |              |
|--------------|--------------|--------------|--------------|--------------|--------------|
| LOC285216    | -0.0917      | -0.223       | -0.367166667 | 0.008466667  | 0.024566667  |
| EVI2A        | -0.073633333 | -0.1869      | -0.1875      | 0.143033333  | 0.1547       |
| SNAPC2       | 0.059033333  | -0.173533333 | 0.006        | 0.203433333  | 0.109433333  |
| HCCS         | -0.081333333 | -0.119833333 | -0.254133333 | 0.0379       | 0.1529       |
| CAMK2N1      | -0.1465      | -0.1601      | 0.026933333  | 0.138533333  | 0.112        |
| NPC1         | -0.139566667 | -0.153533333 | -0.0874      | 0.0412       | 0.058533333  |
| RNF13        | -0.298266667 | -0.186133333 | -0.206133333 | -0.0177      | 0.0604       |
| SNORD11      | 0.0008       | -0.104966667 | 0.050333333  | 0.2328       | 0.101766667  |
| LOC729143    | -0.0508      | -0.035666667 | -0.007233333 | 0.086666667  | 0.188633333  |
| CCT8         | -0.002533333 | 0.015233333  | -0.032233333 | 0.198733333  | 0.190733333  |
| C1orf103     | -0.2288      | -0.1926      | -0.025766667 | -0.019933333 | 0.095866667  |
| TTRAP        | -0.314333333 | 0.053833333  | -0.2921      | -0.056366667 | 0.202466667  |
| ANXA6        | -0.163466667 | -0.005166667 | 0.098633333  | 0.165666667  | 0.376933333  |
| CSNK1E       | -0.048166667 | -0.221366667 | 0.0929       | 0.209866667  | 0.106433333  |
| RABEP1       | -0.1057      | -0.123266667 | -0.158166667 | 0.0542       | 0.1358       |
| RFTN1        | 0.185166667  | 0.038233333  | -0.124       | 0.4018       | 0.328066667  |
| MRPL3        | -0.1292      | 0.084533333  | -0.2842      | 0.147966667  | 0.185166667  |
| PUF60        | 0.0158       | -0.007133333 | -0.125066667 | 0.231433333  | 0.1615       |
| TMEM126B     | -0.1438      | -0.139566667 | -0.070933333 | 0.071        | 0.166633333  |
| MAP4K3       | 0.033066667  | -0.2317      | -0.184       | 0.191233333  | 0.0343       |
| C5orf34      | -0.005533333 | -0.0529      | -0.211266667 | 0.116        | 0.0802       |
| SSR2         | 0.112333333  | -0.091633333 | -0.360266667 | 0.231133333  | 0.080366667  |
| C16orf61     | 0.044033333  | -0.058933333 | -0.1713      | 0.175933333  | 0.160033333  |
| LOC100128163 | 0.0991       | 0.102733333  | -0.111233333 | 0.146266667  | 0.396033333  |
| HLTF         | -0.138       | -0.030466667 | -0.0738      | 0.13         | 0.1032       |
| ARHGEF18     | 0.104533333  | -0.102433333 | -0.326766667 | 0.213433333  | 0.1286       |
| C16orf52     | -0.048666667 | -0.076733333 | 0.391666667  | 0.1405       | 0.229866667  |
| SERINC3      | -0.4825      | -0.065966667 | -0.205       | -0.115       | 0.0969       |
| TRAF3IP2     | -0.1167      | -0.123166667 | -0.0949      | 0.005866667  | 0.172633333  |
| LOC729666    | -0.195466667 | 0.151233333  | -0.3718      | -0.083933333 | 0.354666667  |
| MCAT         | 0.160166667  | -0.151466667 | -0.132066667 | 0.189733333  | 0.1795       |
| CMIP         | 0.060466667  | -0.057933333 | 0.063266667  | 0.2062       | 0.250166667  |
| TMEM167B     | -0.327166667 | -0.038533333 | -0.393566667 | -0.039833333 | -0.131366667 |
| SDCBP        | -0.386233333 | -0.105233333 | -0.0197      | 0.018        | 0.0814       |
| FAM129B      | -0.114533333 | -0.009433333 | 0.192133333  | 0.146466667  | 0.257333333  |
| LHX1         | 0.0322       | -0.0817      | -0.012733333 | 0.159233333  | 0.1151       |
| ITPR1        | -0.3177      | -0.085833333 | -0.106066667 | 0.011633333  | 0.065366667  |
| KCTD13       | -0.228066667 | -0.2714      | -0.0766      | 0.020133333  | -0.015866667 |
| GCNT2        | -0.3367      | -0.074       | -0.115466667 | 0.038633333  | 0.075166667  |
| PI4K2B       | -0.1497      | 0.009466667  | -0.141633333 | 0.056466667  | 0.133633333  |
| FLOT1        | -0.292066667 | -0.372166667 | -0.039133333 | 0.0399       | -0.183766667 |
| OGFR         | 0.147066667  | -0.036666667 | -0.0818      | 0.4189       | 0.117233333  |
| ARL8B        | -0.2027      | -0.1157      | -0.247266667 | 0.1241       | -0.0762      |
| ADPGK        | 0.0133       | -0.090966667 | -0.090566667 | 0.3483       | 0.1056       |
| RBBP8        | 0.084        | -0.160833333 | -0.360366667 | 0.170833333  | 0.004966667  |
| CD97         | -0.4552      | -0.081266667 | -0.087366667 | -0.162333333 | 0.041366667  |
| E4F1         | 0.046566667  | -0.098433333 | -0.262733333 | 0.155466667  | 0.078933333  |

|              |       |              |              |              |              |              |
|--------------|-------|--------------|--------------|--------------|--------------|--------------|
| PROCR        |       | -0.306966667 | -0.070666667 | 0.0982       | 0.107333333  | 0.175733333  |
|              | 6-Mar | -0.125266667 | -0.369133333 | -0.1226      | 0.1014       | 0.092366667  |
| CRYZL1       |       | -0.458866667 | -0.203233333 | 0.0504       | -0.045866667 | -0.041166667 |
| PRR13        |       | -0.274633333 | -0.258166667 | -0.137766667 | -0.090566667 | 0.114633333  |
| STARD3       |       | -0.251566667 | -0.1751      | -0.048033333 | 0.0859       | -0.013833333 |
| SKA1         |       | 0.0783       | -0.108033333 | -0.199466667 | 0.1679       | 0.133833333  |
| OTUD6B       |       | 0.003833333  | 0.067533333  | -0.295166667 | 0.104666667  | 0.138066667  |
| PPP1R15A     |       | 0.106266667  | -0.346866667 | -0.816       | 0.064633333  | -0.1875      |
| IL20RB       |       | -0.1344      | -0.144133333 | -0.278433333 | 0.0235       | 0.067433333  |
| TMEM185B     |       | -0.078633333 | -0.034       | -0.028933333 | 0.138566667  | 0.119233333  |
| TMEM11       |       | 0.150933333  | 0.020633333  | -0.120666667 | 0.351133333  | 0.122333333  |
| IL1RAP       |       | 0.0544       | -0.077766667 | -0.159133333 | 0.397166667  | 0.080566667  |
| C8orf13      |       | -0.0188      | -0.081933333 | -0.317066667 | 0.2828       | 0.1158       |
| SUCLG1       |       | -0.291233333 | -0.250666667 | -0.0625      | 0.011766667  | 0.044066667  |
| KIAA1600     |       | 0.050966667  | -0.134766667 | -0.358133333 | 0.3185       | -0.1445      |
| LOC100190986 |       | -0.021533333 | -0.1296      | 0.0789       | -0.006566667 | 0.0668       |
| NFIA         |       | -0.260066667 | -0.162066667 | 0.046966667  | 0.053233333  | 0.0829       |
| ADRM1        |       | 0.163566667  | -0.0191      | -0.2571      | 0.259633333  | 0.128966667  |
| SYTL2        |       | -0.261933333 | -0.157666667 | -0.241266667 | -0.201866667 | 0.0563       |
| ERI1         |       | 0.102833333  | -0.068233333 | -0.012533333 | 0.229033333  | 0.188033333  |
| HSP90AA1     |       | 0.077033333  | -0.0218      | -0.308933333 | 0.241133333  | 0.289466667  |
| MTMR9        |       | -0.130066667 | -0.222333333 | -0.088866667 | -0.044       | 0.075266667  |
| CKAP2        |       | -0.043       | 0.235566667  | -0.287566667 | 0.188733333  | 0.1252       |
| SUGT1        |       | -0.173166667 | 0.080466667  | -0.096933333 | 0.037        | 0.299666667  |
| ALDH3A2      |       | -0.1218      | -0.1995      | -0.173433333 | -0.012933333 | 0.0334       |
| MANSC1       |       | -0.016966667 | -0.035266667 | 0.114666667  | 0.174933333  | 0.297        |
| PPP2CB       |       | -0.0005      | 0.092266667  | -0.3828      | 0.020433333  | 0.295066667  |
| TRIM3        |       | -0.206833333 | -0.0428      | -0.199533333 | 0.099433333  | 0.032466667  |
| ECM1         |       | -0.216533333 | -0.265233333 | -0.033566667 | 0.062933333  | -0.028       |
| NFKBIA       |       | -0.4655      | -0.285133333 | 0.167033333  | 0.2856       | -0.117333333 |
| SLU7         |       | -0.312633333 | -0.098966667 | -0.1997      | 0.037333333  | -0.074266667 |
| RNU1F1       |       | -0.1529      | -0.174866667 | 0.102233333  | 0.401466667  | -0.0588      |
| PSTK         |       | -0.1224      | -0.050033333 | -0.2231      | 0.185166667  | 0.050033333  |
| C18orf55     |       | 0.075566667  | 0.026433333  | -0.275166667 | 0.211333333  | 0.167066667  |
| AP3D1        |       | -0.218866667 | -0.197333333 | -0.066       | 0.0158       | -0.0283      |
| SNORD14A     |       | -0.0751      | -0.1607      | -0.205266667 | 0.1431       | -0.027166667 |
| NFXL1        |       | 0.0457       | -0.355766667 | -0.025566667 | 0.146        | 0.154166667  |
| VKORC1L1     |       | 0.2481       | -0.186266667 | -0.060366667 | 0.3028       | 0.150366667  |
| LMO2         |       | -0.135066667 | 0.0124       | -0.148933333 | 0.007866667  | 0.2837       |
| RAB5A        |       | -0.1779      | -0.088433333 | -0.051333333 | 0.1468       | 0.0989       |
| GIN54        |       | 0.149133333  | -0.093766667 | -0.047233333 | 0.237266667  | 0.212233333  |
| LOC400214    |       | -0.004266667 | -0.133       | -0.249633333 | 0.2913       | 0.134933333  |
| VDAC1        |       | -0.0596      | -0.1089      | -0.051066667 | 0.2631       | 0.0103       |
| ATP1A1       |       | -0.256333333 | -0.367266667 | 0.1325       | -0.009433333 | 0.049233333  |
| MAFB         |       | -0.0031      | -0.1754      | -0.022466667 | -0.127266667 | 0.142933333  |
| TMEM131      |       | -0.157566667 | -0.129633333 | 0.090933333  | 0.028466667  | 0.087433333  |
| ARPC5L       |       | 0.214866667  | -0.072466667 | -0.1387      | 0.384366667  | 0.017366667  |

|               |              |              |              |              |              |
|---------------|--------------|--------------|--------------|--------------|--------------|
| LOC100129201  | -0.089766667 | -0.227533333 | -0.1753      | -0.0542      | 0.1416       |
| NP1P          | 0.200033333  | -0.197933333 | -0.3274      | 0.2284       | -0.0644      |
| ATG4A         | -0.249166667 | -0.142433333 | -0.209433333 | -0.085833333 | 0.1825       |
| DDX19B        | 0.013        | -0.106633333 | -0.2506      | 0.130366667  | 0.090033333  |
| CREB3L2       | -0.1515      | -0.310966667 | -0.1178      | 0.045233333  | -0.048833333 |
| ADAT3         | 0.027133333  | 0.0074       | -0.1445      | 0.158166667  | 0.177        |
| ZNF410        | 0.0463       | -0.090433333 | -0.248266667 | 0.317333333  | 0.0647       |
| DKFZP686E2158 | 0.135933333  | -0.092233333 | -0.1115      | 0.262666667  | 0.1578       |
| AADAT         | 0.1864       | -0.0239      | -0.3286      | 0.188633333  | 0.102233333  |
| RCBTB2        | -0.206       | -0.319433333 | -0.1984      | -0.117       | 0.0636       |
| TSR2          | 0.079066667  | -0.075633333 | -0.267366667 | 0.260033333  | 0.052866667  |
| PARP9         | -0.3496      | -0.237233333 | 0.0307       | -0.1063      | -0.0113      |
| PSMB1         | -0.037433333 | -0.182033333 | -0.055733333 | 0.1907       | 0.2144       |
| MRPS5         | 0.0453       | 0.000433333  | -0.185       | 0.172266667  | 0.169        |
| C1orf74       | 0.0316       | -0.167933333 | -0.158533333 | 0.132133333  | 0.142333333  |
| NCOA6IP       | 0.065733333  | -0.155433333 | -0.140933333 | 0.194133333  | 0.1973       |
| NME1          | 0.3705       | 0.045566667  | -0.309966667 | 0.3749       | 0.336766667  |
| XRN1          | -0.4976      | -0.344066667 | -0.105533333 | -0.263666667 | 0.0519       |
| SHFM1         | -0.0633      | -0.046866667 | -0.144966667 | 0.113533333  | 0.1642       |
| TMEM201       | 0.376166667  | 0.0164       | -0.218666667 | 0.4883       | 0.112633333  |
| PHCA          | -0.112066667 | -0.0299      | -0.093633333 | 0.005266667  | 0.110866667  |
| LRRC8E        | -0.022333333 | -0.1425      | -0.0804      | 0.2521       | 0.174166667  |
| MRPS35        | 0.021733333  | 0.035033333  | -0.2647      | 0.236133333  | 0.0955       |
| LIMK2         | -0.208733333 | -0.2269      | -0.0719      | 0.053166667  | -0.001366667 |
| STXBP3        | -0.220033333 | -0.0895      | -0.116366667 | 0.189633333  | 0.000566667  |
| EIF2A         | -0.102933333 | -0.165566667 | -0.1018      | 0.199433333  | 0.047466667  |
| POLR2B        | 0.061333333  | 0.044233333  | -0.152266667 | 0.155333333  | 0.2028       |
| ZNF330        | 0.0845       | -0.267033333 | -0.119933333 | 0.214133333  | 0.1162       |
| NDUFV1        | -0.2506      | -0.183433333 | -0.271133333 | -0.059766667 | 0.128766667  |
| BBX           | -0.472866667 | -0.408266667 | 0.1353       | -0.1507      | 0.007133333  |
| PARP10        | -0.309366667 | -0.073533333 | -0.060566667 | -0.135266667 | 0.191366667  |
| NBPF10        | 0.1994       | 0.060633333  | -0.1862      | 0.373        | 0.067166667  |
| TMEM180       | -0.312366667 | -0.107733333 | -0.0957      | -0.0396      | 0.107633333  |
| PRMT3         | 0.138033333  | -0.168266667 | -0.159733333 | 0.255333333  | 0.046533333  |
| HDAC9         | 0.0336       | -0.221566667 | -0.200666667 | 0.293433333  | 0.046166667  |
| ISCA1         | -0.0362      | -0.126033333 | -0.255666667 | 0.0545       | 0.111266667  |
| CLTB          | 0.110866667  | -0.018766667 | -0.2369      | 0.241266667  | 0.1928       |
| LOC642398     | -0.3089      | -0.105233333 | -0.173133333 | -0.186166667 | 0.107066667  |
| LOC100128888  | -0.221666667 | 0.0649       | -0.174166667 | 0.082166667  | 0.2391       |
| ZBTB33        | -0.339633333 | -0.2218      | -0.0575      | 0.0424       | 0.098933333  |
| IRF2BP2       | -0.209633333 | -0.3006      | -0.2035      | -0.1875      | 0.013666667  |
| TMEM9         | -0.436633333 | -0.271266667 | -0.074       | -0.007366667 | -0.1433      |
| NFATC2IP      | -0.083133333 | -0.117633333 | -0.0439      | 0.136066667  | 0.118766667  |
| PAPD1         | 0.010133333  | 0.055033333  | -0.1774      | 0.264333333  | 0.112233333  |
| UBE2I         | 0.009733333  | -0.066266667 | -0.114166667 | 0.156366667  | 0.1151       |
| LOC642489     | -0.104433333 | -0.093966667 | -0.014966667 | 0.143466667  | 0.018766667  |
| HEXIM2        | -0.274133333 | -0.103666667 | -0.1768      | -0.0281      | 0.136066667  |

|              |              |              |              |              |              |
|--------------|--------------|--------------|--------------|--------------|--------------|
| HMOX1        | -0.4536      | -0.4363      | -0.764933333 | -0.269666667 | -0.08        |
| DRG1         | 0.058        | -0.0876      | -0.096966667 | 0.240066667  | 0.135866667  |
| SFRP1        | 0.138533333  | -0.030333333 | 0.2801       | 0.029666667  | 0.218433333  |
| LONRF3       | 0.0261       | -0.101       | -0.0193      | 0.1678       | 0.152033333  |
| GXYLT1       | 0.094166667  | -0.1958      | -0.1295      | 0.298266667  | -0.004866667 |
| DUSP6        | -0.0205      | -0.086866667 | 0.471066667  | 0.1777       | 0.433666667  |
| TRIM21       | -0.199633333 | -0.098366667 | -0.1331      | -0.026933333 | 0.118133333  |
| PLCG2        | -0.291533333 | -0.2388      | -0.1469      | -0.110333333 | 0.054333333  |
| ERN1         | 0.033566667  | -0.068933333 | -0.447966667 | 0.330633333  | -0.043133333 |
| LOC100133012 | -0.1358      | -0.037166667 | -0.141766667 | 0.029166667  | 0.238566667  |
| ABCC3        | -0.949966667 | -0.578966667 | 0.266633333  | -0.616666667 | -0.1532      |
| PRDM4        | -0.084166667 | -0.222533333 | -0.190933333 | 0.064        | 0.0031       |
| DUS2L        | -0.1362      | -0.085766667 | -0.0705      | 0.005533333  | 0.129833333  |
| TPRG1L       | -0.3508      | -0.321833333 | -0.0411      | -0.123933333 | 0.055533333  |
| MAGEA6       | 0.249133333  | -0.239466667 | -0.056966667 | 0.2292       | 0.092566667  |
| MCFD2        | -0.0551      | -0.377866667 | 0.183833333  | 0.2068       | 0.058766667  |
| CLEC2D       | -0.095233333 | -0.0951      | -0.0181      | 0.172433333  | 0.071266667  |
| HSD17B8      | -0.392733333 | -0.3228      | -0.228733333 | -0.153533333 | -0.0205      |
| ATP6V1E1     | -0.347433333 | -0.270733333 | -0.0886      | -0.058466667 | -0.010833333 |
| RBL1         | 0.1982       | -0.058666667 | -0.1314      | 0.307466667  | 0.074        |
| TSSC4        | 0.204266667  | -0.041933333 | -0.251666667 | 0.203033333  | 0.215333333  |
| SEC24C       | -0.2171      | -0.172       | -0.026633333 | -0.056433333 | 0.110066667  |
| ENTPD6       | -0.1459      | -0.124166667 | 0.0797       | 0.153833333  | 0.1859       |
| LOC100133692 | -0.287933333 | -0.054033333 | -0.0637      | 0.2085       | 0.127066667  |
| PPP2R5E      | -0.100533333 | -0.041666667 | -0.102166667 | 0.159933333  | 0.2152       |
| DEAF1        | -0.014666667 | -0.1021      | -0.188433333 | 0.112566667  | 0.002266667  |
| ATP6V1B2     | -0.086433333 | -0.149166667 | -0.300033333 | 0.1453       | -0.024966667 |
| LRRC41       | -0.163866667 | -0.1438      | -0.171533333 | -0.011333333 | 0.0616       |
| CPEB1        | -0.1286      | -0.2032      | -0.252033333 | -0.155366667 | 0.066233333  |
| NSMAF        | -0.1037      | -0.1001      | -0.361533333 | 0.007733333  | 0.0396       |
| LOC644496    | -0.0891      | -0.041966667 | -0.216666667 | 0.014633333  | 0.130166667  |
| HES1         | 0.495433333  | -0.2238      | 0.020666667  | 0.571466667  | 0.1034       |
| DNAJA3       | 0.0013       | -0.1381      | -0.179566667 | 0.0507       | 0.155666667  |
| PTPN22       | -0.072933333 | 0.010733333  | -0.046333333 | -0.0092      | 0.238733333  |
| DAZAP2       | -0.2395      | -0.138133333 | -0.127266667 | 0.0303       | 0.034466667  |
| LOC440145    | 0.175066667  | -0.5468      | 0.078066667  | 0.202166667  | 0.1564       |
| CLK3         | -0.132966667 | -0.1191      | 0.0238       | 0.1972       | -0.0159      |
| LOC100131530 | -0.010766667 | -0.024933333 | -0.0698      | 0.166066667  | 0.134566667  |
| PPP1R12B     | 0.191933333  | -0.159966667 | 0.088666667  | 0.156666667  | 0.2124       |
| RNF167       | -0.223966667 | -0.125933333 | -0.280766667 | -0.072833333 | -0.031366667 |
| COMMD6       | -0.2746      | -0.320333333 | -0.056133333 | -0.0236      | -0.0083      |
| TMEM137      | 0.0557       | 0.138933333  | -0.164433333 | 0.1701       | 0.117033333  |
| ANXA2        | 0.199033333  | -0.151633333 | -0.339866667 | 0.3446       | 0.057066667  |
| PKMYT1       | 0.285166667  | -0.108766667 | -0.128466667 | 0.401933333  | 0.137666667  |
| ASAH2C       | -0.245233333 | -0.1514      | -0.053066667 | 0.0486       | -0.012866667 |
| LOC100131531 | 0.049        | -0.0867      | -0.242166667 | 0.181533333  | 0.0817       |
| LOC644380    | -0.280466667 | 0.291666667  | -0.6145      | -0.052566667 | 0.250733333  |



|              |              |              |              |              |              |
|--------------|--------------|--------------|--------------|--------------|--------------|
| ZNF124       | 0.011866667  | 0.049333333  | -0.159666667 | 0.3048       | 0.2017       |
| PRDM10       | 0.0956       | 0.068433333  | -0.082666667 | 0.2893       | 0.201466667  |
| DYNLL2       | 0.206833333  | 0.070033333  | -0.189366667 | 0.5328       | 0.090566667  |
| E2F7         | 0.0359       | -0.054033333 | -0.159266667 | 0.129133333  | 0.0887       |
| TIMM8A       | 0.2143       | -0.040566667 | -0.221566667 | 0.339466667  | 0.242033333  |
| KIAA1160     | -0.079566667 | -0.3564      | 0.019833333  | 0.023133333  | 0.1097       |
| RHBDD3       | -0.0555      | -0.161133333 | -0.195433333 | 0.239166667  | -0.1047      |
| KIAA1666     | -0.227       | -0.1415      | 0.0837       | 0.075633333  | 0.025433333  |
| KAT2A        | -0.120133333 | -0.097033333 | -0.104166667 | 0.058733333  | 0.125666667  |
| NUAK1        | 0.237833333  | 0.050766667  | -0.2999      | 0.694966667  | -0.030766667 |
| AKAP8        | 0.234833333  | 0.076833333  | -0.168066667 | 0.5103       | 0.127        |
| NDUFB4       | -0.345666667 | 0.083833333  | -0.1649      | -0.039933333 | 0.102366667  |
| MIPOL1       | -0.149566667 | -0.049733333 | -0.1411      | 0.0494       | 0.1608       |
| TUBA1C       | 0.037866667  | -0.0435      | -0.180066667 | 0.145633333  | 0.139133333  |
| MCPH1        | -0.033433333 | -0.043033333 | -0.252866667 | 0.111433333  | 0.144266667  |
| DVL1         | 0.230133333  | -0.103433333 | -0.107433333 | 0.268766667  | 0.074333333  |
| SHRM         | -0.0354      | -0.001366667 | 0.194266667  | 0.525833333  | 0.166566667  |
| SH3RF1       | 0.205533333  | -0.046366667 | -0.1002      | 0.3478       | 0.129433333  |
| REEP5        | -0.1821      | -0.108366667 | -0.138733333 | 0.070366667  | 0.063        |
| SNRPD3       | 0.0831       | -0.091666667 | -0.032833333 | 0.390633333  | 0.2172       |
| BCHE         | -0.383933333 | -0.1471      | -0.052966667 | -0.2014      | 0.088333333  |
| CCDC47       | 0.096566667  | -0.088733333 | -0.304233333 | 0.162733333  | 0.1365       |
| GNB4         | -0.211133333 | 0.345266667  | -0.383566667 | 0.068466667  | 0.255733333  |
| SAMD4A       | -0.0747      | -0.059966667 | -0.0139      | 0.2174       | 0.162633333  |
| GRB2         | 0.144933333  | -0.045533333 | 0.122633333  | 0.395033333  | 0.152066667  |
| GRINA        | -0.522066667 | -0.179666667 | -0.049533333 | -0.120733333 | -0.061733333 |
| LOC440043    | -0.0392      | 0.045766667  | -0.0082      | 0.185033333  | 0.122433333  |
| ICAM3        | -0.050633333 | -0.1766      | -0.0424      | 0.022933333  | 0.204566667  |
| ISCU         | -0.084666667 | -0.120066667 | -0.1895      | 0.1614       | 0.113566667  |
| CECR7        | -0.1296      | -0.046833333 | -0.218933333 | 0.1139       | 0.018533333  |
| SLC36A4      | 0.0154       | 0.096866667  | -0.1089      | 0.213066667  | 0.2953       |
| UTP11L       | 0.043266667  | -0.086366667 | -0.065966667 | 0.1251       | 0.225333333  |
| LOC653752    | 0.0032       | -0.040766667 | -0.122133333 | 0.3818       | 0.142466667  |
| MANBAL       | -0.1559      | -0.057366667 | -0.2253      | 0.090633333  | 0.124933333  |
| KCNE1L       | -0.049766667 | -0.056433333 | -0.0321      | 0.250866667  | 0.140533333  |
| CYB5R1       | -0.286166667 | -0.191466667 | -0.369433333 | 0.064633333  | -0.0668      |
| LOC728739    | -0.106133333 | -0.076266667 | -0.144266667 | 0.067366667  | 0.114133333  |
| NSDHL        | 0.043633333  | -0.043833333 | -0.1294      | 0.0763       | 0.179033333  |
| ECM2         | -0.514566667 | -0.293866667 | -0.393       | -0.476866667 | 0.0231       |
| POLD4        | -0.474533333 | -0.3854      | 0.182366667  | -0.204333333 | -0.012066667 |
| ZNF439       | -0.213466667 | -0.1024      | -0.199       | 0.0855       | 0.101433333  |
| LOC644774    | 0.048366667  | -0.1221      | 0.027066667  | 0.2668       | 0.065366667  |
| LOC100129566 | 0.0059       | 0.071333333  | -0.193933333 | 0.198333333  | 0.326633333  |
| LOC652595    | 0.235666667  | -0.014633333 | -0.267133333 | 0.245766667  | 0.2041       |
| SNORD100     | 0.069466667  | -0.090533333 | -0.2078      | 0.2402       | 0.0137       |
| DDX11        | 0.1055       | -0.0943      | -0.143166667 | 0.1864       | 0.0783       |
| SELT         | -0.123266667 | 0.069166667  | 0.01         | 0.074366667  | 0.2813       |

|           |              |              |              |              |              |
|-----------|--------------|--------------|--------------|--------------|--------------|
| AKAP8L    | -0.02        | -0.0691      | -0.074433333 | 0.236566667  | 0.133133333  |
| ARD1B     | -0.1208      | -0.194533333 | -0.137666667 | 0.071433333  | 0.0033       |
| TTC27     | -0.063833333 | -0.043066667 | -0.103833333 | 0.113366667  | 0.190766667  |
| MDM2      | -0.093166667 | -0.178833333 | -0.123833333 | 0.085733333  | 0.067033333  |
| EZH2      | 0.055933333  | 0.1          | -0.389233333 | 0.228566667  | 0.161666667  |
| SDCCAG10  | -0.268666667 | -0.047766667 | -0.0581      | 0.0074       | 0.181933333  |
| LPIN2     | -0.190333333 | -0.149533333 | 0.122766667  | 0.064        | 0.119333333  |
| WDR79     | 0.147333333  | 0.067833333  | -0.169633333 | 0.183933333  | 0.328066667  |
| EEA1      | -0.302933333 | -0.037866667 | 0.230266667  | -0.080966667 | 0.211233333  |
| CEPT1     | -0.113066667 | -0.1054      | 0.157766667  | 0.1801       | 0.1619       |
| PHTF2     | 0.1006       | -0.173233333 | -0.0855      | 0.259        | 0.070666667  |
| ZNF562    | -0.071033333 | -0.025266667 | -0.019866667 | 0.137        | 0.2414       |
| ABTB1     | -0.389666667 | -0.172033333 | -0.045666667 | -0.103066667 | 0.013733333  |
| THAP1     | 0.0229       | -0.012833333 | -0.0265      | 0.296566667  | 0.247666667  |
| GPT2      | -0.1016      | -0.1456      | -0.2498      | -0.039833333 | 0.054733333  |
| ANKRD10   | -0.003833333 | -0.183766667 | -0.3346      | 0.179233333  | -0.163233333 |
| LOC649169 | 0.3113       | 0.0324       | -0.201933333 | 0.2372       | 0.430766667  |
| E2F4      | 0.006        | -0.0484      | -0.1021      | 0.145833333  | 0.067266667  |
| TGFBRAP1  | 0.111466667  | -0.0816      | -0.198466667 | 0.294766667  | 0.1216       |
| PRKACB    | -0.104166667 | 0.013233333  | -0.091666667 | 0.0595       | 0.105166667  |
| SLC4A7    | 0.3186       | 0.0063       | 0.3652       | 0.383733333  | 0.294733333  |
| TPD52     | -0.053733333 | -0.136033333 | 0.043766667  | 0.2207       | 0.161433333  |
| ELOVL1    | -0.004433333 | -0.0574      | 0.032233333  | 0.2638       | 0.132133333  |
| PTPLB     | -0.047966667 | -0.0954      | -0.230866667 | 0.0938       | 0.072        |
| GTPBP3    | 0.1141       | -0.031966667 | -0.094066667 | 0.223333333  | 0.245866667  |
| OGG1      | 0.120833333  | -0.087466667 | -0.099966667 | 0.2613       | 0.102966667  |
| ZHX2      | -0.291866667 | -0.254566667 | -0.171666667 | 0.005933333  | 0.0581       |
| CHMP4B    | -0.165766667 | -0.0933      | -0.210966667 | 0.075866667  | -0.029233333 |
| SCARB1    | 0.095666667  | -0.3091      | -0.154133333 | 0.218933333  | -0.084766667 |
| STIP1     | -0.027333333 | -0.004333333 | -0.093833333 | 0.1972       | 0.147733333  |
| GSTM1     | -0.331       | -0.307766667 | -0.009033333 | -0.040833333 | -0.010133333 |
| POLM      | -0.083166667 | -0.1278      | -0.1478      | -0.019733333 | 0.109266667  |
| TNFSF13B  | -0.174033333 | -0.183833333 | -0.0937      | -0.042066667 | 0.1049       |
| LOC730167 | 0.341266667  | -0.066933333 | -0.173466667 | 0.390466667  | 0.233133333  |
| HIRIP3    | 0.017666667  | 0.065733333  | -0.261833333 | 0.163033333  | 0.2265       |
| TMEM5     | 0.151966667  | -0.122433333 | -0.1597      | 0.161        | 0.1868       |
| PPP3CB    | -0.0659      | -0.056       | -0.046233333 | 0.1733       | 0.0887       |
| UFD1L     | 0.089566667  | -0.017266667 | -0.239633333 | 0.202166667  | 0.070533333  |
| YIPF2     | -0.357366667 | -0.002766667 | -0.1702      | -0.048933333 | 0.060566667  |
| LOC729978 | 0.097466667  | -0.224366667 | 0.042        | 0.222233333  | -0.0636      |
| C1orf174  | 0.1313       | 0.0367       | -0.204333333 | 0.165466667  | 0.2417       |
| LOC728431 | -0.2295      | -0.1391      | -0.326033333 | 0.0147       | -0.002233333 |
| C20orf111 | 0.0691       | -0.1049      | -0.4377      | 0.0999       | 0.0947       |
| RAD51L1   | -0.069366667 | -0.071966667 | -0.212433333 | 0.0053       | 0.129666667  |
| CCDC111   | 0.0373       | -0.008566667 | -0.154766667 | 0.134666667  | 0.136533333  |
| LIMA1     | 0.158166667  | -0.153166667 | -0.237666667 | 0.406133333  | 0.174166667  |
| SLC20A1   | -0.026166667 | -0.1453      | 0.122366667  | 0.020466667  | 0.1181       |

|           |              |              |              |              |              |
|-----------|--------------|--------------|--------------|--------------|--------------|
| SLC7A11   | -0.125733333 | -0.236233333 | -0.311166667 | -0.083633333 | 0.043033333  |
| LOC645436 | 0.186066667  | -0.092       | -0.111733333 | 0.204366667  | 0.1906       |
| USP16     | 0.100833333  | 0.0461       | -0.2067      | 0.369        | 0.022566667  |
| LOC653071 | -0.269666667 | -0.165766667 | -0.085833333 | -0.109066667 | 0.189233333  |
| KBTBD6    | 0.0281       | -0.100133333 | -0.0472      | 0.0754       | 0.346166667  |
| NME6      | 0.074        | -0.205766667 | -0.110466667 | 0.139933333  | 0.232966667  |
| YWHAZ     | -0.0625      | -0.090266667 | -0.151266667 | 0.150933333  | 0.0504       |
| KIAA0090  | -0.0492      | -0.3222      | -0.179533333 | 0.069733333  | -0.059033333 |
| U2AF1L2   | -0.016066667 | -0.052333333 | -0.1447      | 0.102766667  | 0.169433333  |
| MAP7D3    | -0.064433333 | -0.0385      | -0.028933333 | 0.162466667  | 0.2531       |
| CCDC103   | -0.304033333 | -0.1648      | 0.000133333  | -0.071466667 | 0.1648       |
| VPS54     | -0.146966667 | -0.068133333 | -0.052       | 0.0879       | 0.140633333  |
| BECN1     | -0.1809      | -0.268933333 | -0.1317      | 0.0373       | -0.0747      |
| ZNF767    | -0.151566667 | -0.191766667 | -0.1959      | -0.0713      | -0.0199      |
| NSMCE2    | -0.2014      | -0.1867      | -0.157666667 | 0.041733333  | 0.033666667  |
| PSMD10    | 0.047533333  | -0.128766667 | -0.0593      | 0.154        | 0.142033333  |
| ALDOA     | 0.0832       | -0.235033333 | 0.0957       | 0.145133333  | 0.2052       |
| CASK      | -0.078833333 | -0.077933333 | -0.193533333 | -0.004366667 | 0.056766667  |
| RRAS2     | 0.033933333  | -0.002933333 | -0.1925      | 0.2227       | 0.0764       |
| LOC441050 | 0.1554       | 0.017766667  | -0.187866667 | 0.340866667  | 0.152633333  |
| SLC22A15  | -0.08        | -0.1674      | -0.250966667 | 0.180333333  | -0.0223      |
| ATAD3A    | 0.2077       | 0.104666667  | -0.3118      | 0.254133333  | 0.208633333  |
| HOXA10    | -0.245166667 | -0.288133333 | -0.020366667 | -0.027733333 | 0.134733333  |
| C12orf65  | -0.084866667 | -0.154333333 | -0.2132      | 0.0518       | 0.127633333  |
| ATP6V1H   | -0.174166667 | -0.225166667 | -0.203233333 | 0.002633333  | -0.018466667 |
| C17orf80  | 0.003466667  | -0.126133333 | -0.150866667 | 0.1515       | 0.024733333  |
| DONSON    | 0.251        | 0.0061       | -0.001166667 | 0.317233333  | 0.191433333  |
| EED       | -0.042833333 | 0.205966667  | -0.161566667 | 0.199466667  | 0.2472       |
| NBPF15    | 0.027833333  | 0.056766667  | -0.210266667 | 0.227466667  | 0.069466667  |
| SNURF     | -0.323333333 | -0.135366667 | 0.057166667  | 0.024166667  | 0.079166667  |
| C10orf88  | -0.101833333 | -0.169066667 | -0.077266667 | 0.119033333  | 0.107233333  |
| CA13      | -0.0361      | -0.0128      | -0.2407      | 0.166633333  | 0.193833333  |
| ST3GAL3   | -0.500466667 | -0.297733333 | 0.091966667  | -0.1128      | -0.053733333 |
| LYRM1     | -0.414       | -0.082866667 | 0.0488       | -0.1757      | 0.188866667  |
| SNX6      | -0.064533333 | -0.107733333 | -0.2594      | 0.147266667  | 0.029266667  |
| MLF1IP    | 0.122633333  | 0.0129       | -0.230666667 | 0.406033333  | 0.054966667  |
| SHOX2     | -0.0642      | -0.141966667 | -0.095666667 | 0.044        | 0.0228       |
| MTRR      | 0.125633333  | -0.135566667 | -0.050833333 | 0.255033333  | 0.163033333  |
| HN1       | -0.024633333 | 0.001933333  | -0.115933333 | 0.266266667  | 0.075233333  |
| RIT1      | -0.345566667 | -0.252733333 | 0.076666667  | -0.0344      | 0.038133333  |
| LRAT      | -0.140133333 | -0.2356      | -0.155666667 | 0.1563       | -0.145833333 |
| RNF4      | 0.292133333  | -0.126566667 | -0.209533333 | 0.3682       | 0.0447       |
| LETMD1    | -0.269266667 | -0.358533333 | -0.246766667 | -0.049866667 | -0.1272      |
| NUP54     | 0.040233333  | -0.054533333 | -0.113066667 | 0.268133333  | 0.092166667  |
| FLJ20125  | -0.177466667 | -0.060433333 | -0.220733333 | 0.011533333  | 0.1361       |
| SNORA73A  | 0.057033333  | -0.023666667 | -0.101266667 | 0.313133333  | -0.007533333 |
| FBXL5     | -0.133133333 | -0.1798      | -0.057166667 | 0.111566667  | 0.0265       |

|              |              |              |              |              |              |
|--------------|--------------|--------------|--------------|--------------|--------------|
| PAGE1        | -0.025066667 | -0.091       | -0.1376      | 0.1004       | 0.1929       |
| ADAM19       | -0.061333333 | 0.264933333  | 0.5671       | 0.048133333  | 0.4928       |
| LOC644128    | 0.0856       | -0.085366667 | -0.408666667 | 0.114166667  | 0.072566667  |
| HIST1H4E     | -0.113066667 | 0.096733333  | -0.068666667 | 0.140633333  | 0.331133333  |
| BTBD7        | -0.061866667 | 0.0383       | -0.171433333 | 0.202266667  | 0.1271       |
| PP14571      | 0.093133333  | -0.247166667 | -0.0552      | 0.190033333  | 0.0505       |
| HSP90AB1     | 0.014233333  | 0.1204       | 0.007833333  | 0.2334       | 0.2284       |
| CGN          | 0.161266667  | -0.072033333 | -0.240366667 | 0.170633333  | 0.2601       |
| GOLGA7       | -0.1533      | -0.0829      | 0.003366667  | 0.124066667  | 0.0744       |
| FZD8         | 0.079966667  | 0.0064       | -0.098733333 | 0.0788       | 0.291333333  |
| LOC100133800 | -0.3066      | -0.050833333 | 0.200733333  | 0.074433333  | 0.1951       |
| FN3KRP       | -0.000766667 | -0.213366667 | -0.151733333 | 0.134766667  | 0.050266667  |
| SULT1A1      | -0.291066667 | -0.205533333 | -0.060433333 | -0.2443      | 0.0155       |
| PYROXD1      | -0.172866667 | 0.049766667  | -0.349166667 | 0.0793       | -0.032433333 |
| C9orf95      | -0.3928      | -0.1812      | 0.010133333  | -0.194266667 | 0.048366667  |
| LCP1         | -0.224166667 | -0.0601      | -0.219366667 | -0.043933333 | 0.0099       |
| AGTRAP       | -0.244733333 | -0.320766667 | -0.058366667 | -0.067366667 | -0.0016      |
| KIAA0494     | -0.033066667 | -0.007466667 | -0.296866667 | 0.122733333  | -0.002433333 |
| C2orf30      | -0.187633333 | -0.149866667 | -0.043733333 | 0.0612       | 0.007366667  |
| FUCA2        | -0.082666667 | -0.1175      | -0.0239      | 0.1414       | 0.176166667  |
| FAM98A       | -0.037166667 | 0.016566667  | -0.181966667 | 0.0461       | 0.2489       |
| ZSWIM4       | -0.304433333 | -0.033366667 | 0.2633       | 0.2147       | 0.2112       |
| UBE2J1       | -0.0055      | -0.117266667 | -0.0387      | 0.204966667  | 0.0849       |
| TTC39C       | -0.0223      | -0.159066667 | -0.143566667 | 0.128333333  | 0.0372       |
| LOC654126    | -0.005833333 | -0.048333333 | -0.044333333 | 0.372        | 0.0359       |
| ACVR1B       | -0.052666667 | -0.221566667 | -0.007       | 0.187666667  | -0.0585      |
| TPM4         | -0.051466667 | -0.2381      | 0.1101       | 0.207633333  | -0.0495      |
| RPL36A       | 0.0507       | -0.097066667 | -0.270633333 | 0.101        | 0.1772       |
| NCKAP1       | -0.046766667 | 0.0713       | -0.0339      | 0.278133333  | 0.078266667  |
| C9orf41      | 0.007333333  | -0.134533333 | -0.010066667 | 0.215066667  | 0.101466667  |
| RAB9B        | -0.1313      | -0.254866667 | -0.140266667 | 0.101633333  | 0.0392       |
| SRRD         | 0.184766667  | 0.046666667  | -0.276433333 | 0.2882       | 0.205533333  |
| HIST2H2AA4   | -0.2522      | -0.2287      | 0.191733333  | 0.179066667  | 0.006766667  |
| ERP29        | -0.226966667 | -0.398033333 | -0.159533333 | -0.052966667 | -0.059966667 |
| INF2         | 0.3275       | 0.144133333  | -0.334066667 | 0.5669       | 0.105166667  |
| ATG7         | -0.062766667 | -0.164666667 | 0.030266667  | 0.001333333  | 0.181933333  |
| CSNK1A1      | -0.3247      | -0.0858      | -0.151366667 | -0.014566667 | -0.0561      |
| SNORA6       | 0.156433333  | -0.048833333 | -0.136033333 | 0.205066667  | 0.129966667  |
| C13orf37     | 0.0876       | -0.005233333 | -0.2306      | 0.1628       | 0.110066667  |
| VBP1         | 0.016233333  | -0.138666667 | -0.115066667 | 0.206966667  | 0.065633333  |
| IQCK         | -0.2645      | -0.1644      | -0.142133333 | 0.0473       | -0.0192      |
| MAP2K1       | 0.046133333  | -0.024633333 | 0.099966667  | 0.1609       | 0.2038       |
| ZFAND5       | -0.013866667 | -0.263933333 | -0.242833333 | 0.1249       | -0.039766667 |
| PCCB         | -0.279633333 | -0.1091      | -0.031466667 | -0.052166667 | 0.058966667  |
| CTBP2        | 0.000533333  | -0.1794      | 0.064833333  | 0.239666667  | 0.0788       |
| C16orf42     | 0.058133333  | -0.084833333 | -0.1943      | 0.258133333  | 0.1478       |
| PAWR         | 0.4148       | 0.1079       | -0.368933333 | 0.453866667  | 0.358866667  |

|              |              |              |              |              |              |
|--------------|--------------|--------------|--------------|--------------|--------------|
| TOM1         | -0.498366667 | -0.149766667 | -0.167833333 | -0.1492      | -0.0425      |
| ERCC5        | -0.161233333 | -0.148733333 | -0.006866667 | -0.013633333 | -0.0165      |
| MRPS30       | 0.007966667  | -0.0091      | -0.081566667 | 0.198633333  | 0.1401       |
| C9orf9       | -0.5164      | -0.3777      | 0.106966667  | -0.2285      | -0.098533333 |
| FLJ10996     | 0.010133333  | -0.097733333 | -0.080266667 | 0.223733333  | 0.084766667  |
| AARS         | -0.451966667 | -0.256       | -0.094166667 | -0.2273      | -0.0014      |
| PNO1         | 0.284733333  | 0.0801       | -0.138533333 | 0.487633333  | 0.2571       |
| SLC35A5      | -0.4421      | -0.099066667 | -0.097033333 | -0.035633333 | -0.109566667 |
| DHX8         | -0.127266667 | -0.037833333 | -0.1162      | 0.067166667  | 0.100966667  |
| ZNF503       | -0.0736      | -0.261466667 | 0.0228       | 0.296466667  | -0.091166667 |
| ATP2C1       | -0.093033333 | -0.062133333 | -0.241533333 | 0.0115       | 0.119766667  |
| ESRRA        | -0.1774      | -0.1514      | -0.152633333 | 0.079666667  | 0.013066667  |
| LOC100132418 | 0.1449       | -0.121966667 | -0.099033333 | 0.341533333  | 0.0405       |
| FBXL3        | -0.226566667 | -0.395866667 | -0.087066667 | -0.020633333 | 0.0866       |
| TXNDC9       | -0.070233333 | -0.009533333 | -0.097533333 | 0.1535       | 0.293766667  |
| PPAT         | 0.229766667  | 0.0954       | -0.095033333 | 0.320333333  | 0.180333333  |
| ZNRD1        | 0.005666667  | -0.011433333 | 0.153633333  | 0.317233333  | 0.2381       |
| FAM53C       | -0.0384      | -0.260466667 | -0.134533333 | 0.211466667  | -0.026033333 |
| SCARNA9      | -0.3168      | -0.4248      | -0.049466667 | -0.249166667 | 0.0634       |
| C18orf45     | -0.1576      | -0.0409      | 0.120366667  | 0.039433333  | 0.147233333  |
| ATF6         | -0.2731      | -0.189633333 | -0.106033333 | 0.070033333  | -0.057866667 |
| TBCC         | 0.043833333  | -0.185633333 | -0.043733333 | 0.1649       | 0.172533333  |
| EEF1E1       | -0.039433333 | 0.033566667  | -0.092666667 | 0.2082       | 0.0981       |
| CBY1         | -0.386133333 | -0.2906      | 0.022566667  | -0.217766667 | -0.0154      |
| SH3BGRL2     | -0.161466667 | -0.044333333 | -0.179666667 | 0.078133333  | 0.148933333  |
| UBXN6        | -0.448933333 | -0.373       | 0.0055       | -0.2456      | -0.0984      |
| ERAP2        | -0.186033333 | -0.0864      | -0.0814      | 0.0003       | 0.141233333  |
| LOC100130511 | 0.032433333  | 0.022033333  | -0.105866667 | 0.295133333  | 0.182333333  |
| MGC72080     | -0.133766667 | -0.425933333 | -0.129833333 | -0.0962      | 0.012833333  |
| E2F3         | 0.076466667  | -0.135433333 | 0.015333333  | 0.226766667  | 0.078766667  |
| SSSCA1       | 0.2285       | -0.2617      | 0.015966667  | 0.264333333  | 0.229933333  |
| PTGES3       | -0.092733333 | 0.180166667  | -0.129733333 | 0.187966667  | 0.257033333  |
| PFDN1        | 0.0664       | -0.0224      | -0.0265      | 0.257        | 0.138966667  |
| NIPSNAP1     | -0.842       | -0.382766667 | 0.204133333  | -0.480433333 | -0.111333333 |
| TMEM39A      | -0.088966667 | -0.0056      | -0.045733333 | 0.057166667  | 0.163133333  |
| TM7SF3       | -0.380866667 | -0.236466667 | 0.0059       | -0.0723      | -0.034833333 |
| C16orf35     | -0.2446      | -0.041733333 | -0.080966667 | 0.065866667  | 0.087033333  |
| NMRAL1       | -0.093766667 | -0.128966667 | -0.013333333 | 0.089466667  | 0.0579       |
| AIG1         | -0.266966667 | -0.280133333 | -0.118766667 | -0.114933333 | 0.0489       |
| C14orf43     | 0.0966       | -0.109766667 | -0.072533333 | 0.276666667  | 0.066        |
| LOC648025    | -0.269233333 | -0.2554      | -0.0521      | -0.1651      | 0.112533333  |
| DCTN6        | -0.222233333 | 0.051933333  | -0.1534      | 0.069833333  | 0.166833333  |
| PLEKHF1      | -0.0825      | -0.394566667 | -0.237333333 | 0.077133333  | -0.035433333 |
| PGBD2        | 0.029133333  | -0.0846      | -0.025566667 | 0.1147       | 0.137666667  |
| MME          | -0.1342      | -0.1248      | -0.155566667 | 0.058866667  | 0.0275       |
| LOC100128309 | -0.032466667 | -0.180733333 | -0.253666667 | 0.071533333  | -0.0061      |
| TNFRSF25     | -0.111933333 | 0.009433333  | 0.084233333  | 0.166333333  | 0.101733333  |

|           |              |              |              |              |              |
|-----------|--------------|--------------|--------------|--------------|--------------|
| TSSC1     | -0.359933333 | -0.0833      | -0.140166667 | -0.1252      | 0.015766667  |
| TIMP3     | -0.0449      | 0.209666667  | 0.5854       | 0.064666667  | 0.3545       |
| KCNAB1    | -0.268833333 | -0.2361      | -0.236566667 | -0.142866667 | -0.043066667 |
| ALDOC     | -0.629633333 | -0.591       | 0.5573       | -0.364333333 | -0.1485      |
| C17orf63  | -0.049666667 | -0.117833333 | -0.127166667 | 0.0584       | -0.0258      |
| AAMP      | 0.037633333  | 0.014433333  | -0.0625      | 0.199666667  | 0.143433333  |
| PLRG1     | -0.2939      | -0.147166667 | -0.120933333 | -0.037766667 | -0.008       |
| CYB561D2  | -0.138733333 | -0.228833333 | -0.265433333 | -0.006133333 | -0.047766667 |
| RALB      | -0.097766667 | -0.021533333 | 0.0457       | 0.092033333  | 0.1121       |
| SLC30A7   | -0.0796      | -0.151833333 | -0.0415      | 0.060233333  | 0.075233333  |
| DIP2A     | -0.062533333 | -0.089833333 | 0.050366667  | 0.099833333  | 0.0466       |
| SNX17     | -0.294533333 | -0.132333333 | -0.190933333 | -0.147633333 | 0.0179       |
| MANEA     | -0.072566667 | -0.076733333 | -0.019866667 | 0.019333333  | 0.139966667  |
| CKLF      | -0.036733333 | -0.176433333 | 0.017        | 0.166066667  | 0.108666667  |
| C14orf131 | -0.141566667 | -0.1118      | -0.1693      | 0.006966667  | 0.079733333  |
| NUMB      | -0.147       | -0.008266667 | -0.031366667 | 0.025333333  | 0.109666667  |
| AHSA2     | -0.422866667 | -0.123       | -0.037433333 | -0.3041      | 0.0234       |
| SRFBP1    | 0.0488       | -0.0055      | 0.026233333  | 0.3596       | 0.1415       |
| LOC728969 | 0.143366667  | -0.068733333 | -0.246266667 | 0.296633333  | 0.0909       |
| C19orf24  | -0.017933333 | -0.1536      | -0.078666667 | 0.0958       | 0.1328       |
| LOC339782 | 0.122033333  | -0.0999      | -0.046633333 | 0.275866667  | 0.045266667  |
| GPATCH3   | -0.022566667 | -0.131366667 | -0.192066667 | 0.1602       | 0.066233333  |
| NFKBIE    | 0.147466667  | 0.017066667  | -0.060966667 | 0.489333333  | 0.0966       |
| C12orf52  | -0.006833333 | -0.096866667 | -0.0548      | 0.1859       | 0.1492       |
| MAP1S     | -0.010166667 | -0.0299      | -0.1073      | 0.174466667  | 0.1064       |
| UBE1DC1   | 0.1206       | -0.134466667 | -0.210733333 | 0.2126       | 0.0184       |
| HSPBAP1   | -0.0966      | -0.1979      | -0.183266667 | 0.003433333  | 0.031266667  |
| BCL6      | -0.339666667 | -0.136466667 | -0.014866667 | -0.129766667 | 0.081966667  |
| C14orf93  | -0.328033333 | -0.271666667 | -0.062333333 | -0.027166667 | -0.0302      |
| LSM4      | 0.077266667  | -0.182866667 | -0.1975      | 0.117766667  | 0.1591       |
| SLFN12    | 0.1701       | 0.076633333  | -0.2377      | 0.427566667  | 0.016        |
| SRPK1     | 0.0481       | 0.017933333  | 0.002966667  | 0.2406       | 0.208666667  |
| GEMIN4    | 0.317233333  | 0.0431       | -0.214466667 | 0.209966667  | 0.197        |
| L3MBTL2   | -0.1235      | -0.0286      | -0.142533333 | 0.010933333  | 0.100533333  |
| ZNF559    | -0.151233333 | -0.140433333 | -0.200033333 | 0.015866667  | 0.115766667  |
| MRPL35    | -0.153666667 | -0.1659      | -0.056133333 | 0.101133333  | 0.0678       |
| CREM      | -0.181033333 | 0.1161       | -0.3135      | -0.0167      | 0.188166667  |
| SLC9A6    | -0.103533333 | -0.173166667 | -0.2016      | 0.027066667  | -0.000166667 |
| LOC642969 | 0.035733333  | 0.088233333  | -0.227733333 | 0.146566667  | 0.163833333  |
| MRPS22    | -0.028066667 | -0.068066667 | -0.161866667 | 0.134266667  | 0.060333333  |
| RBMS1     | 0.2821       | -0.080033333 | -0.072       | 0.318        | 0.034833333  |
| ASCC2     | 0.012033333  | -0.058933333 | -0.236133333 | 0.0546       | 0.168466667  |
| DGCR11    | -0.103733333 | -0.073833333 | -0.1231      | 0.164666667  | -0.028433333 |
| SNORD38A  | -0.054433333 | -0.100933333 | -0.1182      | 0.1433       | 0.0344       |
| KRT81     | -0.435966667 | -0.067766667 | 0.609933333  | -0.158133333 | 0.228066667  |
| CYBRD1    | -0.321533333 | -0.236633333 | -0.038766667 | -0.216633333 | 0.004366667  |
| GALNT1    | -0.063533333 | -0.0704      | -0.281433333 | 0.158633333  | 0.0497       |

|              |              |              |              |              |              |
|--------------|--------------|--------------|--------------|--------------|--------------|
| RAB38        | -0.032733333 | 0.001366667  | -0.168133333 | -0.015866667 | 0.1372       |
| C2orf76      | -0.176433333 | 0.0422       | -0.126766667 | -0.017266667 | 0.162966667  |
| SSR1         | -0.0609      | -0.0707      | -0.023833333 | 0.157133333  | 0.159        |
| CRIPT        | -0.264566667 | -0.195566667 | -0.0467      | -0.078433333 | 0.140233333  |
| TRIM6        | -0.385233333 | -0.288433333 | 0.212466667  | -0.159566667 | -0.034466667 |
| PHOSPHO2     | -0.076066667 | -0.130166667 | -0.069633333 | -0.020233333 | 0.206        |
| CCDC115      | -0.100433333 | -0.2766      | -0.2203      | 0.0241       | -0.063766667 |
| FLJ20674     | -0.042066667 | -0.0938      | -0.139566667 | 0.127133333  | 0.0771       |
| CSTF1        | 0.1124       | -0.0561      | -0.003733333 | 0.348666667  | 0.184133333  |
| PLAT         | 0.1095       | 0.250766667  | 0.601633333  | 0.081133333  | 0.576466667  |
| ATG5         | -0.0632      | -0.0404      | -0.0614      | 0.084466667  | 0.160333333  |
| LOC391811    | -0.1972      | -0.084833333 | -0.037166667 | 0.142633333  | 0.025233333  |
| ERI3         | -0.156433333 | 0.0054       | -0.2598      | 0.0355       | 0.057166667  |
| RNMT         | -0.0664      | -0.1467      | -0.181       | 0.088933333  | -0.004066667 |
| POLS         | 0.1275       | -0.070566667 | 0.022933333  | 0.432733333  | 0.098633333  |
| TAF4B        | 0.0421       | 0.053866667  | -0.118966667 | 0.2399       | 0.258233333  |
| LOC100130154 | -0.2347      | 0.0667       | -0.316533333 | -0.0382      | 0.108533333  |
| UBAC2        | -0.367333333 | -0.037966667 | -0.0928      | -0.077733333 | 0.0165       |
| LOC728653    | -0.137966667 | -0.060166667 | -0.1481      | 0.055433333  | 0.076266667  |
| STK17B       | -0.013066667 | 0.084233333  | -0.043       | 0.2265       | 0.1646       |
| BRI3BP       | 0.460766667  | -0.180733333 | -0.105366667 | 0.325        | 0.196633333  |
| LASP1        | -0.076733333 | -0.023866667 | -0.0125      | 0.0352       | 0.125133333  |
| ZNF518B      | -0.325833333 | -0.2998      | 0.027833333  | -0.079633333 | 0.002633333  |
| ATF3         | 0.082133333  | -0.660833333 | -1.097733333 | 0.136533333  | -0.406133333 |
| ASNS         | -0.1625      | -0.304133333 | -0.293533333 | -0.166133333 | -0.041433333 |
| PLEKHM2      | -0.281433333 | -0.186933333 | -0.1407      | -0.1337      | 0.046266667  |
| CTNS         | -0.167933333 | -0.178466667 | -0.5008      | -0.120033333 | 0.0046       |
| PPIE         | -0.193233333 | -0.052533333 | -0.146066667 | 0.039133333  | 0.0598       |
| NUDT7        | -0.436533333 | -0.230566667 | -0.004433333 | -0.2047      | -0.0109      |
| SAP30L       | 0.0568       | -0.0522      | -0.093466667 | 0.213133333  | 0.1988       |
| RNY3         | -0.138533333 | -0.127666667 | 0.229033333  | 0.289433333  | 0.019666667  |
| PODXL2       | 0.123933333  | -0.1261      | -0.271466667 | 0.162066667  | -0.013933333 |
| GEMIN5       | 0.2656       | 0.020366667  | -0.124666667 | 0.382933333  | 0.124066667  |
| CXorf38      | -0.1074      | -0.260466667 | 0.077066667  | 0.168333333  | -0.0408      |
| UBIAD1       | 0.217766667  | -0.067533333 | -0.206533333 | 0.283166667  | 0.0892       |
| RNU105A      | 0.044833333  | -0.035666667 | -0.120566667 | 0.311966667  | -0.010733333 |
| LOC23117     | 0.061566667  | -0.050033333 | -0.015933333 | 0.302366667  | 0.0166       |
| HHAT         | 0.103        | 0.076066667  | -0.336533333 | 0.3823       | 0.052966667  |
| DDX31        | 0.232466667  | -0.093766667 | -0.046466667 | 0.335266667  | 0.128533333  |
| MED30        | -0.037766667 | 0.025566667  | 0.0014       | 0.115866667  | 0.221133333  |
| SEC24D       | -0.197533333 | -0.0061      | 0.097866667  | -0.068033333 | 0.3827       |
| CHAF1A       | 0.268133333  | -0.134766667 | -0.1831      | 0.326966667  | 0.014966667  |
| TACC2        | 0.056333333  | -0.143533333 | -0.249433333 | 0.188366667  | 0.100033333  |
| ZNF775       | -0.054566667 | -0.149266667 | -0.207166667 | 0.058166667  | -0.001666667 |
| CAPN1        | -0.3914      | -0.1563      | 0.058266667  | -0.009133333 | -0.0604      |
| CIDECP       | -0.221733333 | -0.009166667 | -0.117       | -0.048866667 | 0.200333333  |
| LOC652481    | 0.1936       | -0.084566667 | 0.0775       | 0.241166667  | 0.2146       |

|           |              |              |              |              |              |
|-----------|--------------|--------------|--------------|--------------|--------------|
| PSMG4     | 0.1465       | -0.149266667 | -0.186166667 | 0.145733333  | 0.117033333  |
| MRPS18C   | -0.013866667 | -0.0045      | -0.1405      | 0.196233333  | 0.1712       |
| SLTM      | -0.138666667 | -0.051766667 | -0.025066667 | 0.1693       | 0.2561       |
| C1orf71   | -0.067733333 | -0.091266667 | 0.079333333  | 0.105466667  | 0.1261       |
| DCTD      | 0.063        | -0.1502      | -0.0648      | 0.086466667  | 0.121933333  |
| LOC646548 | 0.047133333  | -0.086666667 | -0.372266667 | 0.123233333  | -0.040266667 |
| TMEM185A  | -0.116133333 | -0.051266667 | -0.069       | -0.016066667 | 0.1311       |
| LOC613037 | 0.055233333  | -0.247533333 | 0.020633333  | 0.092333333  | 0.007366667  |
| KCMF1     | 0.209233333  | -0.089366667 | -0.127466667 | 0.2898       | 0.096633333  |
| GLRX3     | 0.026966667  | 0.0147       | -0.198866667 | 0.1632       | 0.151633333  |
| SNX25     | 0.2261       | -0.048166667 | -0.136466667 | 0.3351       | 0.146233333  |
| PSMD14    | 0.052        | -0.015266667 | -0.114833333 | 0.1989       | 0.153766667  |
| JMJD1A    | -0.451266667 | -0.135233333 | 0.184233333  | -0.0632      | 0.0967       |
| TBC1D16   | -0.117766667 | -0.045666667 | 0.004333333  | -0.0692      | 0.1255       |
| RPF2      | 0.025066667  | -0.091766667 | -0.2569      | 0.0755       | 0.104266667  |
| C9orf123  | -0.253466667 | -0.231733333 | -0.168733333 | -0.1175      | 0.016366667  |
| SHISA5    | -0.415533333 | -0.198133333 | 0.052666667  | -0.148833333 | 0.038233333  |
| OAZ1      | -0.1051      | -0.188766667 | -0.044466667 | -0.008266667 | 0.100133333  |
| ANKRD46   | -0.1297      | -0.236566667 | 0.0433       | 0.132333333  | -0.032333333 |
| C14orf100 | -0.211033333 | -0.057966667 | -0.092333333 | 0.095633333  | 0.0412       |
| FAM57A    | 0.413433333  | -0.255933333 | -0.048066667 | 0.422566667  | 0.058166667  |
| PVRL3     | -0.175933333 | -0.107066667 | 0.0885       | 0.056533333  | 0.118366667  |
| ZNF174    | 0.08         | -0.268066667 | -0.067566667 | 0.176733333  | -0.0552      |
| ODC1      | -0.024466667 | -0.114766667 | -0.274633333 | 0.077466667  | 0.023533333  |
| GRN       | -0.586666667 | -0.3077      | 0.147433333  | -0.153066667 | -0.051066667 |
| C11orf58  | -0.117366667 | -0.0198      | -0.107633333 | 0.179933333  | 0.187233333  |
| NCOA4     | -0.1291      | -0.1781      | -0.138133333 | 0.086166667  | 0.0052       |
| XBP1      | -0.370466667 | -0.056833333 | -0.0453      | -0.1278      | 0.1096       |
| LOC285407 | -0.152533333 | 0.0371       | -0.0961      | -0.0864      | 0.386066667  |
| RIOK2     | -0.008633333 | -0.0146      | -0.2121      | 0.309666667  | -0.081666667 |
| ADAM9     | 0.029166667  | -0.138333333 | -0.0417      | 0.191933333  | 0.041533333  |
| BAG2      | 0.198433333  | -0.003733333 | -0.163033333 | 0.2134       | 0.335566667  |
| Magmas    | 0.131733333  | -0.139866667 | -0.042866667 | 0.205666667  | 0.143133333  |
| MED8      | 0.190933333  | -0.155966667 | -0.084166667 | 0.1906       | 0.150866667  |
| CEBPB     | -0.3947      | -0.250933333 | -0.198166667 | -0.142533333 | -0.116966667 |
| MRPL32    | -0.025033333 | -0.025966667 | 0.0251       | 0.230133333  | 0.0883       |
| CCDC59    | -0.012433333 | -0.056766667 | -0.168266667 | 0.2794       | 0.1049       |
| LOC728944 | 0.2057       | -0.076833333 | -0.2637      | 0.229033333  | 0.094133333  |
| RAB21     | 0.055833333  | -0.054533333 | -0.424966667 | 0.021433333  | 0.110666667  |
| BCAR1     | 0.200966667  | -0.113933333 | 0.037066667  | 0.3343       | 0.181333333  |
| RABGEF1   | -0.0817      | -0.0331      | -0.1252      | 0.1517       | 0.035        |
| ZNF800    | 0.264        | -0.181833333 | -0.094333333 | 0.354566667  | 0.010566667  |
| BARD1     | 0.148366667  | -0.1657      | -0.147866667 | 0.199866667  | 0.021066667  |
| SMAGP     | 0.130133333  | 0.029        | 0.094033333  | 0.2777       | 0.148        |
| TDRD7     | -0.345733333 | -0.133566667 | -0.067266667 | -0.2132      | 0.054133333  |
| OXR1      | -0.2347      | -0.5023      | 0.055866667  | -0.089766667 | 0.0096       |
| FAM54A    | 0.113933333  | 0.016133333  | -0.275366667 | 0.172733333  | 0.079933333  |



|           |              |              |              |              |              |
|-----------|--------------|--------------|--------------|--------------|--------------|
| STOM      | 0.206966667  | 0.044466667  | -0.107       | 0.3102       | 0.2067       |
| POLR3K    | 0.406        | -0.063033333 | -0.1195      | 0.4568       | 0.135466667  |
| IL28RA    | -0.259       | -0.1492      | 0.020033333  | 0.058766667  | -0.012466667 |
| PTPMT1    | 0.030266667  | -0.041066667 | -0.159066667 | 0.193833333  | 0.2076       |
| DNAJC22   | -0.312733333 | -0.3087      | 0.0986       | -0.161633333 | -0.057433333 |
| ADK       | 0.202233333  | -0.066333333 | -0.038633333 | 0.271833333  | 0.146666667  |
| NRBF2     | -0.278733333 | -0.0433      | -0.199066667 | 0.077633333  | -0.009333333 |
| SEMA7A    | 0.023266667  | 0.0617       | -0.0472      | 0.187566667  | 0.183633333  |
| GPR172A   | 0.009333333  | -0.027166667 | -0.210333333 | 0.134933333  | 0.061533333  |
| NR2C2AP   | -0.049666667 | 0.052433333  | -0.273233333 | 0.137866667  | 0.1155       |
| TACC1     | 0.187333333  | -0.0121      | -0.168833333 | 0.223433333  | 0.0757       |
| BEX5      | -0.034166667 | -0.104566667 | -0.156       | -0.0069      | 0.082466667  |
| CALCOCO2  | -0.232866667 | -0.198766667 | -0.3421      | -0.121266667 | -0.055766667 |
| PITPNA    | 0.128566667  | -0.115733333 | -0.1727      | 0.095233333  | 0.1085       |
| RFXAP     | -0.174033333 | -0.0658      | -0.302366667 | 0.007        | -0.0567      |
| LOC727761 | 0.188933333  | -0.021533333 | -0.1996      | 0.321033333  | 0.1962       |
| DUSP23    | -0.072666667 | -0.0543      | -0.055866667 | 0.109833333  | 0.1642       |
| TSPAN17   | -0.0607      | -0.171066667 | -0.270566667 | -0.0474      | 0.0696       |
| LOC643357 | 0.033233333  | -0.044566667 | 0.029033333  | 0.111366667  | 0.266133333  |
| TPST2     | 0.061066667  | 0.013366667  | -0.123733333 | 0.3345       | 0.117966667  |
| C9orf72   | -0.174566667 | -0.2259      | -0.177566667 | 0.024866667  | 0.0471       |
| KLC1      | -0.121833333 | -0.1199      | 0.095766667  | 0.070633333  | 0.1672       |
| ZC3H14    | 0.019        | -0.046733333 | -0.062066667 | 0.176933333  | 0.158666667  |
| MYCBP2    | -0.063333333 | 0.105933333  | -0.038133333 | 0.101766667  | 0.089233333  |
| KTN1      | 0.1504       | -0.140133333 | -0.0937      | 0.287933333  | 0.048233333  |
| TP53I13   | -0.083133333 | -0.181733333 | -0.0135      | -0.0252      | 0.151233333  |
| LYAR      | 0.3308       | 0.0621       | -0.118033333 | 0.485133333  | 0.197666667  |
| C21orf56  | -0.1944      | 0.000866667  | -0.105133333 | 0.062466667  | 0.0589       |
| C18orf32  | -0.493233333 | -0.226766667 | -0.0305      | -0.193666667 | 0.0832       |
| CARS      | -0.3464      | -0.2186      | -0.1149      | -0.119033333 | -0.077533333 |
| CPA4      | 0.188333333  | -0.094166667 | -0.403366667 | 0.0798       | 0.027466667  |
| TTC1      | -0.191233333 | -0.146533333 | -0.01        | 0.072933333  | -0.047566667 |
| ZNF319    | -0.195766667 | -0.278233333 | -0.143366667 | 0.030266667  | -0.1695      |
| CDIPT     | -0.010833333 | -0.164866667 | -0.078433333 | 0.063166667  | 0.0119       |
| LOC646463 | -0.363866667 | -0.2955      | 0.119866667  | -0.1821      | 0.0093       |
| PHC2      | 0.144733333  | -0.057       | 0.231133333  | 0.225566667  | 0.239233333  |
| SLAMF7    | 0.064233333  | -0.216033333 | -0.092766667 | 0.104133333  | 0.1786       |
| PCGF6     | 0.208166667  | 0.011366667  | -0.2014      | 0.287866667  | 0.0719       |
| TSPAN4    | -0.048866667 | -0.116       | -0.025233333 | 0.091666667  | 0.128266667  |
| NUS1      | -0.071033333 | -0.233733333 | 0.0593       | 0.109166667  | 0.146833333  |
| LOC730235 | -0.094533333 | -0.126933333 | -0.2214      | 0.0196       | -0.023966667 |
| TFB2M     | -0.028233333 | 0.001066667  | -0.1007      | 0.156033333  | 0.134133333  |
| KAT5      | -0.0322      | 0.069666667  | -0.219366667 | 0.085133333  | 0.053433333  |
| RAE1      | 0.0706       | -0.005733333 | -0.1374      | 0.298833333  | 0.1148       |
| SNORA14B  | -0.031133333 | 0.079        | -0.148533333 | 0.002133333  | 0.2415       |
| TTC17     | -0.237066667 | -0.262133333 | -0.067466667 | 0.002466667  | -0.0043      |
| PPARD     | -0.038433333 | -0.1187      | 0.060233333  | 0.304366667  | 0.0663       |

|              |              |              |              |              |              |
|--------------|--------------|--------------|--------------|--------------|--------------|
| LOC100129267 | 0.149133333  | -0.024933333 | -0.0327      | 0.421033333  | 0.083933333  |
| CPNE1        | 0.215033333  | 0.120233333  | -0.238666667 | 0.415866667  | 0.042033333  |
| KLF12        | -0.046133333 | -0.014933333 | 0.077433333  | -0.055933333 | 0.233233333  |
| SMN1         | 0.086233333  | 0.127233333  | -0.146233333 | 0.288566667  | 0.234433333  |
| RNU6ATAC     | 0.006133333  | 0.0252       | -0.091133333 | 0.382        | 0.137966667  |
| MAT2A        | 0.4164       | -0.070833333 | -0.156333333 | 0.4358       | 0.069666667  |
| ADCY7        | -0.041933333 | -0.072833333 | -0.125866667 | -0.026433333 | 0.1944       |
| SF3B4        | 0.094633333  | -0.034466667 | -0.123266667 | 0.262133333  | 0.0754       |
| C11orf80     | -0.303033333 | -0.134033333 | 0.034233333  | -0.103666667 | 0.046833333  |
| AP1GBP1      | -0.172766667 | -0.111233333 | -0.128633333 | 0.0781       | -0.005366667 |
| STEAP1       | 0.1184       | 0.0117       | -0.071833333 | 0.191366667  | 0.175133333  |
| C3orf54      | 0.0603       | -0.128433333 | -0.292366667 | 0.1572       | -0.065833333 |
| YTHDF1       | 0.146933333  | 0.052766667  | -0.118033333 | 0.2653       | 0.121966667  |
| NAGK         | -0.2104      | -0.012333333 | -0.137866667 | -0.125733333 | 0.1809       |
| CCDC49       | 0.038266667  | 0.046533333  | -0.106833333 | 0.261633333  | 0.232366667  |
| NGDN         | 0.234166667  | -0.071633333 | -0.286233333 | 0.345966667  | 0.032366667  |
| CD151        | 0.086833333  | -0.318233333 | -0.008366667 | 0.2125       | -0.0367      |
| ZDHHC18      | 0.170533333  | -0.138066667 | -0.0984      | 0.262633333  | 0.071966667  |
| LOC440157    | -0.0134      | 0.199733333  | -0.132833333 | 0.0334       | 0.244433333  |
| POP7         | 0.512866667  | 0.046166667  | -0.0712      | 0.4085       | 0.2285       |
| TRPC4AP      | -0.044433333 | -0.317633333 | -0.063633333 | 0.025733333  | 0.046766667  |
| EIF6         | 0.0791       | -0.1371      | -0.0602      | 0.147433333  | 0.057866667  |
| NF2          | 0.403033333  | -0.055233333 | -0.119866667 | 0.4426       | 0.159666667  |
| PAQR3        | 0.053766667  | -0.192066667 | -0.184533333 | 0.074366667  | 0.124166667  |
| FOSB         | 0.270566667  | -0.181066667 | -0.200533333 | 0.400566667  | 0.071933333  |
| ATP6VOD1     | -0.243266667 | -0.198066667 | -0.1464      | -0.1014      | -0.016833333 |
| ZNF670       | -0.002633333 | 0.1156       | -0.102166667 | 0.202        | 0.2668       |
| ZNF323       | -0.231766667 | -0.270266667 | -0.144033333 | -0.081733333 | 0.0089       |
| BCAR3        | 0.0882       | 0.021033333  | 0.173866667  | 0.309266667  | 0.1309       |
| TRAPPC2L     | -0.256733333 | -0.137566667 | -0.223933333 | 0.007633333  | -0.005933333 |
| PDIA6        | 0.0114       | -0.084766667 | 0.074266667  | 0.2223       | 0.0065       |
| KRBA1        | -0.111033333 | -0.377333333 | -0.152133333 | 0.0612       | -0.0777      |
| RAD9A        | 0.1066       | -0.140933333 | -0.087166667 | 0.369233333  | 0.048333333  |
| CSTF2        | 0.142566667  | -0.0529      | -0.2316      | 0.199566667  | 0.1906       |
| ARMCX3       | -0.2114      | -0.224866667 | -0.056066667 | 0.067166667  | -0.002166667 |
| VPS36        | -0.092933333 | -0.046166667 | -0.226733333 | -0.023933333 | 0.124033333  |
| PRNPIP       | -0.155733333 | -0.045033333 | -0.139       | 0.004066667  | 0.0668       |
| ANKRD9       | -0.121466667 | -0.270966667 | -0.267533333 | -0.0954      | -0.019233333 |
| NAT1         | -0.052133333 | -0.032066667 | -0.396433333 | 0.0132       | 0.0196       |
| NR2F2        | 0.083366667  | -0.0975      | 0.059666667  | 0.201033333  | 0.183433333  |
| GALK1        | -0.3641      | -0.2274      | 0.005733333  | -0.166566667 | -0.039066667 |
| METTL1       | 0.1837       | 0.0306       | -0.2619      | 0.1804       | 0.2605       |
| LOC641298    | 0.198133333  | 0.036        | -0.368433333 | 0.385133333  | -0.011533333 |
| LOC729198    | -0.188866667 | 0.062033333  | -0.0952      | 0.0621       | 0.157733333  |
| C16orf13     | -0.134533333 | -0.0287      | 0.099766667  | 0.230033333  | 0.118433333  |
| LOC646609    | -0.195033333 | -0.049933333 | -0.128033333 | -0.084866667 | 0.120166667  |
| ZNF593       | 0.103533333  | -0.108033333 | 0.031266667  | 0.284266667  | 0.1436       |

|              |              |              |              |              |              |
|--------------|--------------|--------------|--------------|--------------|--------------|
| UAP1         | 0.3028       | 0.185933333  | -0.260566667 | 0.307866667  | 0.259266667  |
| LOC143666    | -0.017266667 | -0.197766667 | -0.197666667 | -0.012666667 | 0.0966       |
| LOC650515    | 0.0771       | -0.150033333 | -0.135833333 | 0.164266667  | 0.204        |
| PPAN         | 0.304833333  | 0.038        | -0.157433333 | 0.402366667  | 0.220566667  |
| LOC100128266 | 0.261866667  | -0.204433333 | -0.055766667 | 0.2204       | 0.156133333  |
| C20orf177    | 0.0726       | -0.1366      | -0.243533333 | 0.125333333  | 0.086666667  |
| LOC645015    | -0.056466667 | -0.051433333 | -0.2017      | 0.1552       | 0.047333333  |
| LOC653479    | -0.165033333 | -0.200766667 | -0.0886      | 0.1148       | -0.096766667 |
| GTF2E2       | -0.1058      | -0.0535      | 0.007266667  | 0.012766667  | 0.1592       |
| METTL2A      | -0.112966667 | 0.060533333  | -0.0928      | 0.093866667  | 0.262866667  |
| LOC728263    | 0.050933333  | -0.122366667 | -0.011533333 | 0.245266667  | -0.033333333 |
| PPP1R11      | -0.143433333 | -0.162833333 | -0.135233333 | -0.039933333 | 0.0246       |
| ZBED5        | -0.1346      | -0.1593      | -0.230666667 | -0.031466667 | 0.049133333  |
| TMBIM1       | -0.129633333 | 0.1331       | -0.263766667 | -0.042133333 | 0.063166667  |
| RNU1A3       | -0.182766667 | -0.102       | 0.163833333  | 0.4147       | -0.070133333 |
| NAT12        | -0.011433333 | -0.118533333 | -0.047366667 | 0.2216       | 0.197        |
| OSMR         | -0.111966667 | -0.265133333 | 0.054533333  | 0.040166667  | -0.016166667 |
| MRPL49       | 0.017433333  | -0.031833333 | -0.098433333 | 0.151066667  | 0.088333333  |
| IRX3         | 0.3013       | -0.0991      | -0.0066      | 0.3506       | 0.1372       |
| RYK          | 0.084466667  | 0.079666667  | 0.034466667  | 0.247433333  | 0.2103       |
| PSMC6        | -0.1219      | 0.211533333  | -0.346       | 0.030433333  | 0.192766667  |
| EHHADH       | -0.318866667 | -0.232333333 | -0.101733333 | -0.079766667 | -0.105066667 |
| NEDD4L       | 0.059233333  | 0.0465       | 0.1015       | 0.209933333  | 0.084433333  |
| LOC644632    | -0.1555      | -0.077366667 | -0.067       | -0.015066667 | 0.054366667  |
| SLC39A10     | 0.075866667  | -0.0106      | -0.0261      | 0.1887       | 0.208766667  |
| CYB561       | -0.2813      | -0.2172      | 0.0171       | -0.000566667 | 0.013933333  |
| HSPC268      | -0.173066667 | 0.594833333  | -0.1154      | -0.002266667 | 0.425        |
| RHBDF2       | -0.417433333 | -0.095266667 | -0.064       | -0.196033333 | 0.052066667  |
| TIMM23B      | 0.039933333  | 0.0234       | -0.0168      | 0.3889       | -0.0413      |
| ZNF165       | -0.215933333 | -0.0444      | -0.267633333 | -0.0899      | -0.0224      |
| TMSB10       | 0.0257       | -0.218833333 | -0.0506      | 0.153466667  | 0.072933333  |
| LOC147804    | 0.045333333  | 0.256466667  | -0.279366667 | 0.2747       | 0.3977       |
| DOHH         | 0.170033333  | 0.1542       | -0.1509      | 0.383266667  | 0.194033333  |
| LOC221710    | 0.285033333  | -0.0416      | -0.190266667 | 0.370066667  | 0.109333333  |
| ARHGAP1      | -0.1628      | -0.098466667 | 0.032066667  | 0.030266667  | 0.118966667  |
| SMARCAL1     | -0.330266667 | -0.148233333 | -0.024033333 | -0.161333333 | 0.0934       |
| C20orf43     | -0.2481      | -0.107966667 | -0.1003      | 0.0049       | 0.015333333  |
| RSL1D1       | 0.109333333  | 0.005733333  | -0.124933333 | 0.2459       | 0.1665       |
| YARS2        | 0.0215       | -0.023766667 | -0.114533333 | 0.188133333  | 0.136366667  |
| GABARAPL1    | -0.015966667 | -0.1332      | -0.308233333 | 0.339566667  | -0.077266667 |
| PSMD6        | 0.162233333  | -0.088       | -0.251066667 | 0.178766667  | 0.048166667  |
| MGAT1        | 0.0462       | -0.283733333 | -0.0997      | 0.1949       | 0.036833333  |
| FAM43A       | 0.2461       | -0.096533333 | -0.091733333 | 0.231466667  | 0.1709       |
| TUSC2        | -0.041966667 | -0.089233333 | -0.269933333 | 0.172133333  | -0.033333333 |
| PQLC1        | 0.037        | -0.232866667 | -0.156466667 | 0.055966667  | 0.0147       |
| NOL9         | -0.0805      | 0.017866667  | 0.060333333  | 0.1836       | 0.182        |
| VPS33A       | -0.0465      | -0.1692      | -0.1136      | -0.013466667 | 0.1328       |

|           |              |              |              |              |              |
|-----------|--------------|--------------|--------------|--------------|--------------|
| ENO1      | -0.2263      | -0.0016      | 0.041266667  | 0.039633333  | 0.095366667  |
| CYB5A     | 0.0387       | -0.111866667 | -0.044733333 | 0.186066667  | 0.1306       |
| LOC401074 | -0.020566667 | -0.146733333 | -0.1702      | 0.049266667  | 0.107433333  |
| TMEM64    | 0.154066667  | -0.330066667 | -0.025066667 | 0.2288       | 0.165966667  |
| TPM3      | 0.1839       | -0.099466667 | 0.172966667  | 0.336466667  | 0.216633333  |
| C8orf48   | -0.2441      | -0.136533333 | -0.266666667 | -0.114433333 | 0.082166667  |
| SFXN1     | 0.228733333  | 0.097        | -0.053166667 | 0.3558       | 0.079833333  |
| ANKRD16   | 0.060166667  | -0.0634      | -0.171366667 | 0.100533333  | 0.122333333  |
| VPS72     | -0.209533333 | -0.028733333 | -0.042       | 0.134266667  | 0.104466667  |
| SLC7A5    | 0.0931       | -0.385833333 | -0.790366667 | 0.010533333  | -0.1679      |
| BAZ1A     | 0.2661       | -0.118333333 | 0.032633333  | 0.3306       | 0.135566667  |
| LOC440525 | -0.091766667 | -0.0565      | -0.093366667 | 0.042766667  | 0.208733333  |
| QPCT      | -0.324533333 | -0.279133333 | 0.049066667  | -0.121366667 | -0.016633333 |
| CIRH1A    | 0.098366667  | -0.0532      | 0.010766667  | 0.246566667  | 0.107733333  |
| PPIA      | 0.0854       | -0.1393      | -0.236633333 | 0.198933333  | -0.014566667 |
| LOC730820 | 0.03         | -0.149066667 | -0.192533333 | 0.099033333  | -0.004633333 |
| HS6ST2    | 0.022166667  | -0.033733333 | -0.2378      | 0.150666667  | 0.126133333  |
| COG3      | -0.1909      | -0.0748      | -0.108266667 | 0.0989       | -0.021666667 |
| CDC25A    | 0.688666667  | -0.018866667 | -0.121133333 | 0.6205       | 0.0907       |
| NCAPH2    | 0.1481       | -0.056133333 | -0.324033333 | 0.2313       | 0.046766667  |
| LIN54     | 0.147533333  | -0.079866667 | -0.1777      | 0.2645       | 0.0727       |
| C18orf22  | 0.2766       | -0.038333333 | -0.054366667 | 0.366266667  | 0.095433333  |
| ATE1      | 0.310966667  | -0.0264      | -0.110033333 | 0.499966667  | 0.095566667  |
| ASB7      | 0.0118       | -0.132966667 | -0.139233333 | 0.146633333  | 0.1046       |
| RPS15     | -0.0219      | 0.017166667  | -0.143333333 | 0.159866667  | 0.123166667  |
| MAP7D1    | 0.028733333  | 0.0964       | -0.035       | 0.237166667  | 0.0515       |
| AXIN2     | -0.1155      | -0.0038      | -0.039966667 | 0.0107       | 0.322233333  |
| ELK3      | 0.049466667  | 0.0774       | -0.120933333 | 0.161133333  | 0.016266667  |
| REXO1     | 0.139266667  | 0.069433333  | -0.077533333 | 0.300466667  | 0.106766667  |
| PDCL      | -0.053133333 | -0.058133333 | -0.018       | 0.068866667  | 0.2042       |
| FAHD2A    | -0.288633333 | -0.021133333 | -0.162266667 | -0.0542      | 0.0368       |
| TRAF3IP1  | 0.001166667  | -0.089466667 | -0.0156      | 0.146366667  | 0.0654       |
| CDC34     | 0.056466667  | -0.052666667 | 0.009566667  | 0.206933333  | 0.151166667  |
| KIF21A    | 0.086133333  | -0.187966667 | -0.0956      | 0.109933333  | 0.206066667  |
| OSGIN1    | -0.142933333 | -0.139333333 | -0.3133      | 0.0163       | 0.067133333  |
| SLC22A18  | -0.6115      | -0.370866667 | 0.239533333  | -0.3242      | -0.246066667 |
| KCTD10    | -0.033733333 | 0.000133333  | -0.110566667 | 0.161666667  | 0.012566667  |
| PIK3R4    | 0.042433333  | 0.023933333  | -0.1238      | 0.265066667  | 0.052233333  |
| CENPN     | 0.027466667  | 0.024766667  | -0.229766667 | 0.1839       | 0.124566667  |
| CSRNP2    | 0.053533333  | -0.147266667 | -0.248166667 | 0.202533333  | -0.030166667 |
| CD47      | -0.1013      | -0.1801      | 0.052        | 0.057233333  | 0.0823       |
| MPP1      | -0.012933333 | -0.300866667 | -0.224433333 | -0.1116      | 0.017433333  |
| PQLC3     | -0.278666667 | -0.133533333 | -0.061233333 | -0.024966667 | 0.023433333  |
| NOP2      | 0.2849       | -0.072233333 | -0.239533333 | 0.281333333  | 0.111366667  |
| HEBP2     | -0.3963      | -0.131066667 | 0.044033333  | -0.1336      | 0.019266667  |
| SLC22A5   | -0.165166667 | -0.103566667 | -0.145       | 0.0288       | -0.039533333 |
| LOC730063 | -0.1183      | -0.1324      | -0.2132      | 0.0094       | -0.0247      |

|           |              |              |              |              |              |
|-----------|--------------|--------------|--------------|--------------|--------------|
| LOC92249  | -0.235       | -0.082133333 | -0.2243      | 0.0189       | -0.049733333 |
| CNNM2     | 0.019566667  | -0.1044      | -0.137433333 | 0.121766667  | -0.0311      |
| TWF1      | -0.028466667 | 0.1797       | -0.032166667 | 0.093266667  | 0.283833333  |
| LOC644689 | -0.253433333 | -0.318633333 | 0.091933333  | -0.207166667 | 0.1367       |
| POLQ      | -0.0261      | 0.037733333  | -0.101266667 | 0.193333333  | 0.095666667  |
| CSNK2A1P  | 0.022966667  | -0.051733333 | 0.012133333  | 0.235433333  | 0.1872       |
| MBNL1     | -0.023633333 | 0.086966667  | -0.006166667 | 0.1537       | 0.194366667  |
| CCDC86    | 0.201333333  | 0.114833333  | -0.0768      | 0.321466667  | 0.213966667  |
| FAM120A   | -0.079033333 | -0.056133333 | -0.029166667 | 0.0229       | 0.177566667  |
| EDEM1     | 0.101533333  | -0.254066667 | 0.011133333  | 0.125833333  | -0.051566667 |
| NUP98     | 0.010966667  | -0.1072      | -0.0832      | 0.120166667  | 0.100166667  |
| GMPS      | 0.162033333  | -0.0156      | -0.2331      | 0.1533       | -0.0077      |
| GNS       | -0.374166667 | -0.268       | 0.0784       | -0.1247      | 0.0105       |
| URB2      | 0.237066667  | 0.068233333  | -0.246166667 | 0.361433333  | 0.0644       |
| RBM38     | 0.273966667  | 0.0249       | -0.398666667 | 0.101133333  | 0.146066667  |
| POLR1C    | 0.125766667  | 0.050266667  | -0.127666667 | 0.2811       | 0.051266667  |
| TRIM25    | -0.158666667 | -0.3587      | -0.1122      | -0.0818      | 0.0659       |
| C6orf72   | -0.0799      | -0.151       | -0.061566667 | 0.093733333  | -0.092666667 |
| CCDC130   | -0.3851      | -0.205433333 | -0.1081      | -0.201533333 | -0.023333333 |
| ENG       | 0.160866667  | -0.0859      | 0.016533333  | 0.2058       | 0.162333333  |
| C3orf70   | -0.0567      | -0.106133333 | -0.101866667 | 0.072266667  | 0.175166667  |
| DNAJC13   | -0.2431      | -0.135066667 | -0.015233333 | -0.106266667 | 0.0845       |
| TMEM14A   | -0.203866667 | -0.072633333 | 0.1231       | -0.048       | 0.161733333  |
| UTP23     | 0.1225       | -0.001366667 | -0.092166667 | 0.288966667  | 0.100466667  |
| DDX56     | -0.005633333 | 0.0648       | -0.121133333 | 0.097433333  | 0.157566667  |
| DUSP11    | -0.074233333 | -0.038433333 | -0.227366667 | 0.0971       | 0.1275       |
| LOC729789 | -0.0947      | -0.096       | 0.020533333  | 0.0185       | 0.041133333  |
| TRIM58    | 0.295033333  | -0.163533333 | -0.258433333 | 0.233366667  | 0.0433       |
| VDAC3     | 0.071533333  | -0.0576      | -0.153566667 | 0.1784       | 0.071866667  |
| C16orf53  | 0.241566667  | -0.113566667 | 0.063333333  | 0.200833333  | 0.2222       |
| TTC25     | -0.391266667 | -0.321733333 | -0.0908      | -0.206866667 | -0.072966667 |
| JOSD1     | 0.033266667  | -0.149033333 | -0.1868      | 0.1264       | 0.009466667  |
| MRPS2     | 0.205766667  | 0.054733333  | -0.015333333 | 0.440366667  | 0.112933333  |
| STAM      | -0.105966667 | -0.042733333 | -0.0918      | 0.0735       | 0.047733333  |
| ZNF777    | -0.083966667 | -0.015666667 | -0.196966667 | 0.1175       | 0.099833333  |
| CBR4      | -0.271766667 | -0.2784      | 0.0202       | -0.246066667 | 0.0502       |
| ADSS      | -0.091033333 | 0.0225       | -0.107066667 | 0.0805       | 0.091333333  |
| TMEM161A  | -0.220566667 | -0.0592      | -0.0276      | 0.0123       | 0.031666667  |
| LRAP      | 0.0309       | 0.112166667  | -0.0863      | 0.1106       | 0.192133333  |
| THUMPD2   | 0.032133333  | 0.132433333  | -0.163933333 | 0.2564       | 0.1353       |
| USP47     | -0.0128      | -0.1827      | -0.157133333 | 0.055966667  | -0.043966667 |
| DOCK11    | -0.3411      | -0.0818      | -0.086933333 | -0.092966667 | 0.0398       |
| LOC401397 | -0.373966667 | -0.079633333 | 0.0392       | -0.041333333 | 0.022433333  |
| WHAMM     | 0.045133333  | -0.034133333 | 0.026566667  | 0.184466667  | 0.0475       |
| ACER3     | -0.0688      | -0.0012      | -0.104466667 | 0.0288       | 0.1718       |
| RPL23AP53 | 0.002966667  | -0.050766667 | -0.135666667 | 0.1674       | 0.107566667  |
| RFK       | -0.082566667 | -0.0036      | -0.2155      | 0.061633333  | 0.207166667  |

|              |              |              |              |              |              |
|--------------|--------------|--------------|--------------|--------------|--------------|
| CSRP2BP      | 0.011966667  | -0.107733333 | -0.304033333 | 0.065633333  | 0.0381       |
| LOC100128291 | -0.3507      | -0.004466667 | -0.1858      | -0.1337      | 0.116333333  |
| C7orf20      | 0.125333333  | -0.0785      | -0.122566667 | 0.225133333  | 0.098266667  |
| CCDC46       | -0.245033333 | -0.123466667 | -0.0095      | -0.0632      | -0.081233333 |
| C17orf71     | -0.084666667 | -0.083433333 | -0.136033333 | 0.101466667  | -0.0024      |
| C9orf25      | 0.045033333  | -0.074133333 | -0.263566667 | 0.132866667  | 0.083766667  |
| COP22        | -0.419566667 | -0.200666667 | -0.0065      | -0.1755      | -0.0346      |
| LOC388474    | 0.007966667  | -0.1467      | -0.154033333 | 0.016833333  | 0.1585       |
| FOXN2        | -0.1083      | -0.123533333 | 0.157666667  | 0.163233333  | 0.1717       |
| CALU         | 0.0259       | -0.290033333 | -0.076366667 | 0.043166667  | -0.004966667 |
| HSPA12A      | -0.103866667 | -0.157966667 | -0.1795      | 0.018033333  | 0.081866667  |
| VAMP5        | -0.678433333 | -0.2747      | 0.2034       | -0.3653      | -0.016666667 |
| NXT1         | 0.120066667  | 0.051433333  | -0.170066667 | 0.242933333  | 0.108        |
| FASTKD3      | 0.256633333  | 0.071866667  | -0.291233333 | 0.329166667  | 0.042766667  |
| CAB39        | 0.1578       | -0.013933333 | -0.055966667 | 0.2329       | 0.1049       |
| SH3GL1       | 0.028733333  | -0.045533333 | -0.167366667 | 0.1284       | 0.091833333  |
| XPC          | -0.178733333 | -0.1833      | -0.1089      | -0.166466667 | 0.087466667  |
| NUDT16       | 0.057833333  | -0.140066667 | -0.032933333 | 0.3248       | 0.118766667  |
| IFT20        | -0.2268      | -0.0546      | -0.3276      | -0.1168      | 0.108933333  |
| RPP38        | -0.032033333 | -0.119566667 | -0.128733333 | 0.0975       | 0.156633333  |
| C7orf68      | -0.018933333 | -0.1677      | -0.0047      | 0.120733333  | 0.113966667  |
| C7orf27      | -0.142466667 | -0.007666667 | -0.081966667 | 0.005        | 0.119266667  |
| LOC729779    | -0.1158      | -0.330066667 | -0.364366667 | -0.121233333 | -0.175133333 |
| MIR125B2     | -0.017966667 | -0.063566667 | -0.078833333 | 0.192033333  | 0.013633333  |
| FADS3        | -0.198966667 | -0.216533333 | -0.0092      | -0.014333333 | -0.054333333 |
| TBK1         | -0.0382      | -0.013533333 | -0.102366667 | 0.207166667  | -0.001233333 |
| WASH2P       | -0.028366667 | -0.009866667 | -0.207366667 | 0.1076       | 0.1618       |
| CTTN         | -0.166533333 | -0.2653      | 0.015666667  | -0.081766667 | 0.017466667  |
| MARS2        | 0.307466667  | -0.135866667 | -0.218133333 | 0.2482       | 0.058066667  |
| SERPINE1     | 0.058566667  | 0.044        | -0.059266667 | 0.151366667  | 0.196433333  |
| PTBP1        | 0.306133333  | -0.081533333 | -0.118933333 | 0.346733333  | 0.087833333  |
| SNRNP27      | -0.061566667 | -0.109766667 | -0.088633333 | 0.174333333  | 0.036566667  |
| FEN1         | 0.5068       | 0.0886       | -0.262233333 | 0.340866667  | 0.179366667  |
| CTDP1        | 0.1205       | -0.127666667 | -0.162066667 | 0.211433333  | 0.060533333  |
| LOC401019    | -0.195266667 | -0.1103      | -0.075366667 | 0.101466667  | -0.031166667 |
| DCAF16       | 0.1398       | -0.050866667 | -0.192933333 | 0.403666667  | 0.0041       |
| MAF1         | -0.056866667 | -0.014666667 | -0.003       | 0.003666667  | 0.178033333  |
| STX1A        | 0.056133333  | -0.0806      | 0.19         | 0.084733333  | 0.170133333  |
| MAP1B        | -0.134733333 | -0.390433333 | -0.173666667 | -0.114266667 | -0.120533333 |
| B4GALT3      | -0.065166667 | -0.042566667 | -0.008533333 | 0.089633333  | 0.188366667  |
| TBC1D15      | -0.0511      | -0.062733333 | -0.053566667 | 0.272966667  | 0.005633333  |
| DAP3         | 0.071466667  | -0.1734      | -0.187266667 | 0.136333333  | -0.034733333 |
| EVI5L        | -0.533533333 | -0.375266667 | 0.121433333  | -0.3743      | -0.061033333 |
| PEX16        | -0.302366667 | -0.257833333 | -0.165       | -0.226633333 | -0.055       |
| GK           | -0.116333333 | -0.0338      | -0.0724      | 0.240733333  | -0.067366667 |
| RQCD1        | 0.1419       | -0.008833333 | -0.042566667 | 0.247733333  | 0.163633333  |
| LOC729608    | 0.035266667  | 0.059933333  | -0.142166667 | 0.243633333  | 0.120266667  |

|           |              |              |              |              |              |
|-----------|--------------|--------------|--------------|--------------|--------------|
| TCF7      | -0.1385      | -0.035366667 | 0.033866667  | 0.1137       | 0.001433333  |
| TAOK3     | -0.363033333 | -0.029       | -0.1564      | -0.155833333 | 0.033966667  |
| KCNK3     | -0.0606      | -0.0775      | -0.057333333 | 0.1297       | 0.0824       |
| GM2A      | -0.248633333 | -0.008066667 | -0.098366667 | -0.087733333 | 0.146466667  |
| SLC20A2   | -0.045566667 | -0.022666667 | 0.017        | 0.0624       | 0.128833333  |
| ATP5G1    | -0.1797      | -0.027533333 | 0.064933333  | 0.031066667  | 0.1817       |
| AFF1      | -0.0869      | -0.059966667 | -0.1731      | -0.042533333 | 0.0994       |
| PGM5      | -0.0741      | -0.154333333 | -0.191066667 | 0.2015       | -0.004933333 |
| LASS2     | 0.022933333  | -0.008866667 | -0.139166667 | 0.231366667  | 0.1429       |
| WWP1      | -0.122533333 | -0.187366667 | -0.0591      | 0.1424       | 0.039533333  |
| HS2ST1    | -0.055833333 | -0.010466667 | -0.216433333 | 0.022733333  | 0.108166667  |
| ZNF696    | 0.3019       | -0.183466667 | -0.0221      | 0.267933333  | 0.1123       |
| RPUSD4    | -0.0449      | -0.011066667 | -0.1891      | 0.098433333  | 0.0237       |
| LOC650152 | 0.17         | 0.095866667  | -0.052733333 | 0.278233333  | 0.184166667  |
| STX12     | -0.229366667 | -0.022366667 | -0.2085      | -0.045766667 | 0.048933333  |
| UEVLD     | -0.2595      | 0.020033333  | -0.019033333 | 0.03         | 0.132733333  |
| SAFB      | 0.1448       | 0.053633333  | -0.1497      | 0.174        | 0.195233333  |
| PAIP2     | 0.034        | 0.0561       | -0.107866667 | 0.187233333  | 0.1222       |
| RNF216L   | 0.295266667  | -0.121466667 | -0.135766667 | 0.3777       | 0.0829       |
| DPP3      | -0.138       | -0.300233333 | 0.093533333  | -0.029133333 | 0.1208       |
| C15orf52  | 0.101133333  | -0.067366667 | -0.362866667 | 0.1397       | 0.059033333  |
| CHORDC1   | 0.126433333  | 0.1874       | 0.025766667  | 0.3099       | 0.4335       |
| LOC389286 | 0.214633333  | -0.1878      | -0.1491      | 0.113133333  | 0.170933333  |
| WTAP      | 0.099866667  | -0.0217      | -0.101033333 | 0.207866667  | 0.2313       |
| TCEAL1    | -0.300866667 | -0.2444      | -0.075933333 | -0.0284      | -0.0811      |
| PLTP      | -0.2631      | -0.5231      | 0.114533333  | -0.1922      | -0.154366667 |
| RNF44     | -0.0958      | 0.0017       | -0.0045      | 0.1065       | 0.157633333  |
| MIER2     | -0.038533333 | -0.019333333 | 0.005966667  | 0.062        | 0.0002       |
| FLJ10986  | -0.2638      | -0.255733333 | -0.013466667 | -0.086566667 | -0.035066667 |
| CLTC      | -0.213233333 | -0.1148      | -0.222433333 | -0.054266667 | 0.105966667  |
| DARS      | -0.051966667 | -0.144733333 | -0.072966667 | 0.0316       | 0.0903       |
| LOC654342 | -0.0034      | -0.045266667 | -0.061633333 | 0.176666667  | -0.024033333 |
| LOC641978 | 0.0824       | -0.0766      | -0.297133333 | 0.096433333  | 0.0294       |
| TUBA3D    | -0.052633333 | 0.341766667  | -0.2199      | 0.222733333  | 0.1604       |
| PHAX      | -0.008933333 | 0.5274       | 0.026966667  | 0.092766667  | 0.566333333  |
| CRYZ      | -0.0019      | -0.008966667 | 0.103566667  | 0.077        | 0.187833333  |
| PSMC1     | 0.290133333  | -0.1863      | -0.0936      | 0.297033333  | 0.1426       |
| FLJ12949  | 0.172033333  | -0.0193      | 0.005633333  | 0.331666667  | 0.221066667  |
| PIK3C2A   | -0.241866667 | -0.497533333 | -0.133633333 | -0.143266667 | 0.000433333  |
| C1orf149  | 0.046633333  | -0.053266667 | -0.101333333 | 0.0672       | 0.133566667  |
| PEA15     | 0.155266667  | -0.077033333 | -0.381333333 | 0.232833333  | -0.0476      |
| EIF4E3    | -0.049766667 | -0.052333333 | -0.073633333 | 0.0952       | 0.106633333  |
| GPATCH2   | 0.043966667  | -0.120366667 | -0.205833333 | 0.175033333  | -0.091433333 |
| LOC644979 | 0.2557       | -0.048966667 | -0.150333333 | 0.3442       | 0.017066667  |
| PSMA5     | 0.074433333  | -0.0897      | -0.052233333 | 0.251733333  | 0.0656       |
| ST3GAL6   | -0.1559      | -0.0343      | -0.026133333 | 0.0515       | 0.133        |
| C6orf115  | -0.231933333 | -0.120133333 | -0.166166667 | -0.0209      | 0.064833333  |

|              |              |              |              |              |              |
|--------------|--------------|--------------|--------------|--------------|--------------|
| GALNT12      | -0.146366667 | -0.3373      | -0.102666667 | -0.073566667 | -0.1673      |
| ZNF271       | -0.115366667 | -0.199666667 | -0.1523      | 0.0479       | -0.008533333 |
| ZZZ3         | -0.090266667 | -0.2894      | -0.281466667 | 0.0432       | -0.114       |
| PCID2        | -0.078866667 | 3.33E-05     | -0.179066667 | 0.142633333  | 0.087166667  |
| STYXL1       | -0.272033333 | -0.1122      | -0.022233333 | -0.0309      | 0.058933333  |
| MTE          | 0.1924       | -0.0482      | 0.000266667  | 0.201766667  | 0.270866667  |
| RAB8A        | 0.024133333  | -0.092566667 | 0.003166667  | 0.136666667  | 0.107966667  |
| NFASC        | -0.083366667 | -0.106466667 | -0.0641      | 0.041566667  | 0.148566667  |
| FAIM         | -0.339933333 | 0.063766667  | -0.3525      | -0.149866667 | 0.152766667  |
| MXI1         | -0.160633333 | -0.274566667 | -0.0231      | 0.011366667  | 0.0687       |
| NUDT14       | -0.467066667 | -0.207533333 | 0.026433333  | -0.214533333 | 0.039133333  |
| BET1L        | -0.0644      | -0.107233333 | -0.082033333 | 0.138        | -0.0041      |
| ARF4         | 0.128566667  | -0.122766667 | 0.015566667  | 0.190266667  | 0.100366667  |
| ARAF         | 0.024833333  | -0.0691      | -0.122066667 | 0.1455       | 0.1173       |
| SF4          | -0.0922      | 0.015933333  | -0.2995      | -0.068166667 | 0.050166667  |
| ELK1         | 0.0396       | -0.016166667 | -0.110033333 | 0.053233333  | 0.123833333  |
| DAZAP1       | -0.069266667 | 0.119033333  | -0.131233333 | 0.130733333  | 0.0738       |
| UBE2K        | 0.048233333  | -0.0513      | 0.107666667  | 0.249166667  | 0.116233333  |
| MCTP1        | -0.110766667 | -0.048933333 | 0.0087       | 0.202133333  | 0.070833333  |
| HRAS         | -0.070633333 | 0.020133333  | -0.091866667 | 0.112533333  | 0.146133333  |
| C3orf17      | -0.061066667 | -0.105266667 | -0.103666667 | 0.0953       | 0.123566667  |
| CTSK         | -0.268133333 | -0.2382      | 0.0872       | -0.127566667 | -0.086766667 |
| NRAS         | -0.064333333 | -0.038466667 | 0.104766667  | 0.121933333  | 0.207966667  |
| MKNK2        | -0.447366667 | -0.126733333 | 0.092566667  | -0.1715      | 0.147966667  |
| TMEM14B      | -0.163266667 | -0.0495      | -0.135733333 | 0.0909       | -0.017133333 |
| RBM22        | 0.090866667  | -0.0188      | -0.104333333 | 0.155966667  | 0.138166667  |
| LOC100133033 | -0.063433333 | -0.130533333 | -0.110166667 | -0.0306      | 0.069166667  |
| HS1BP3       | -0.273333333 | -0.1072      | -0.169       | -0.153733333 | 0.016033333  |
| NEU1         | -0.133666667 | -0.2793      | -0.132033333 | -0.024933333 | 0.0129       |
| MIIP         | 0.1548       | -0.1182      | -0.0989      | 0.077433333  | 0.181266667  |
| FTHL7        | -0.3372      | -0.085233333 | 0.061633333  | -0.092433333 | 0.119633333  |
| ZNF714       | -0.045833333 | -0.039833333 | -0.030133333 | 0.1539       | 0.1027       |
| APOBEC3C     | -0.316633333 | 0.091366667  | 0.161266667  | -0.004166667 | 0.218        |
| DHRS4L2      | -0.158966667 | -0.2265      | -0.115966667 | -0.006866667 | 0.0287       |
| DDX18        | 0.418433333  | 0.0411       | -0.2465      | 0.4203       | 0.138233333  |
| BRIX1        | 0.102833333  | 0.0857       | -0.151066667 | 0.213933333  | 0.212166667  |
| NFX1         | -0.122733333 | -0.108066667 | -0.141766667 | 0.082366667  | 0.029733333  |
| GGA1         | -0.042733333 | -0.260066667 | -0.080266667 | 0.0115       | 0.004633333  |
| PRPS1        | 0.1504       | 0.079833333  | -0.260066667 | 0.4164       | 0.1307       |
| FAM100A      | 0.082        | -0.145866667 | 0.121033333  | 0.399966667  | -0.007633333 |
| PRKAA1       | -0.0231      | -0.075333333 | 0.1948       | 0.119066667  | 0.280266667  |
| TBC1D9B      | -0.160633333 | -0.181       | -0.072       | 0.001633333  | -0.0507      |
| MAK16        | 0.138466667  | -0.0168      | -0.201233333 | 0.3061       | 0.023866667  |
| FLCN         | -0.0481      | -0.078766667 | -0.1666      | 0.087033333  | 0.1386       |
| ANKZF1       | -0.129566667 | -0.0635      | -0.1614      | 0.054466667  | 0.0128       |
| LOC341315    | -0.2716      | -0.106233333 | -0.3874      | -0.129866667 | -0.067433333 |
| ETF1         | -0.004666667 | 0.102866667  | -0.311666667 | 0.047466667  | 0.1759       |



|              |              |              |              |              |              |
|--------------|--------------|--------------|--------------|--------------|--------------|
| LOC441087    | -0.1236      | 0.251466667  | -0.0809      | 0.084133333  | 0.233933333  |
| RBM12B       | -0.133133333 | -0.122       | 0.097333333  | 0.056666667  | 0.0449       |
| ITPRIP       | 0.411233333  | -0.174066667 | -0.080066667 | 0.4535       | -0.103533333 |
| EIF4H        | 0.165033333  | -0.100066667 | 0.036966667  | 0.278566667  | 0.1662       |
| MXD1         | -0.101133333 | -0.186433333 | -0.122966667 | 0.068633333  | -0.024066667 |
| SF3B1        | -0.024933333 | -0.071833333 | 0.154233333  | 0.1572       | 0.185366667  |
| OSBPL11      | -0.078733333 | 0.0589       | -0.1478      | 0.132533333  | 0.211266667  |
| LOC728825    | 0.0868       | 0.038966667  | -0.209766667 | 0.136233333  | 0.0861       |
| XAGE1        | 0.3647       | -0.005133333 | -0.303533333 | 0.232566667  | 0.189366667  |
| TOLLIP       | 0.100166667  | -0.2485      | -0.142633333 | 0.1808       | 0.001466667  |
| PROK1        | 0.1195       | -0.1715      | -0.0409      | 0.098766667  | 0.097233333  |
| LOC653171    | 0.116533333  | 0.018566667  | -0.056966667 | 0.303166667  | 0.0294       |
| AFG3L2       | 0.114566667  | -0.062666667 | -0.270033333 | 0.123666667  | 0.023        |
| SAMD9L       | -0.292066667 | -0.247733333 | -0.110133333 | -0.137966667 | -0.056833333 |
| LOC441408    | -0.028833333 | -0.187333333 | -0.3898      | 0.119633333  | -0.040633333 |
| NARS         | -0.158866667 | -0.044433333 | -0.302066667 | -0.1282      | 0.096933333  |
| SIRT7        | 0.019966667  | -0.2835      | -0.2332      | -0.029366667 | 0.034433333  |
| SLC6A10P     | -0.172133333 | -0.321466667 | -0.029433333 | 0.065933333  | -0.099866667 |
| FAM35A       | 0.208466667  | -0.0024      | -0.296333333 | 0.1234       | 0.110866667  |
| NPLOC4       | 0.2147       | -0.261866667 | -0.183766667 | 0.1378       | -0.1031      |
| STK4         | -0.004866667 | -0.4073      | -0.002533333 | 0.0219       | 0.028133333  |
| EIF4A3       | 0.125533333  | -0.062       | -0.0141      | 0.263766667  | 0.134466667  |
| ST3GAL1      | 0.1035       | -0.194166667 | 0.258033333  | 0.3665       | -0.018933333 |
| RNH1         | -0.156266667 | -0.077533333 | -0.013033333 | 0.074733333  | -0.0692      |
| UTP18        | 0.144633333  | 0.144933333  | -0.238066667 | 0.247433333  | 0.118166667  |
| NAGPA        | -0.088533333 | -0.260033333 | -0.245133333 | 0.0515       | -0.065       |
| OGFOD1       | -0.038533333 | -0.2829      | -0.074433333 | -0.002333333 | 0.087166667  |
| FAHD2B       | -0.2975      | -0.2027      | -0.0706      | -0.1091      | -0.154366667 |
| LOC100132352 | -0.2074      | -0.074433333 | -0.0856      | 0.069333333  | 0.058566667  |
| SOCS4        | 0.069133333  | -0.316133333 | -0.0491      | 0.093533333  | 0.050666667  |
| ACLY         | -0.050133333 | -0.092066667 | 0.0415       | 0.265466667  | -0.050066667 |
| SERGEF       | -0.439733333 | -0.164266667 | -0.103266667 | -0.309866667 | 0.035733333  |
| RNU1-5       | 0.0132       | -0.157633333 | 0.1965       | 0.4049       | 0.049033333  |
| LOC653113    | -0.164833333 | -0.161933333 | -0.159733333 | 0.112333333  | -0.066666667 |
| CTH          | -0.231533333 | -0.122266667 | -0.200066667 | -0.108766667 | 0.0489       |
| TPI1         | 0.096466667  | -0.213433333 | 0.0399       | 0.0896       | -0.018833333 |
| ROCK2        | -0.095933333 | 0.113533333  | -0.043       | 0.167233333  | -0.042033333 |
| WBP5         | -0.5156      | -0.197433333 | -0.0197      | -0.2118      | -0.105566667 |
| TPD52L2      | 0.130733333  | -0.1795      | -0.203566667 | 0.073933333  | 0.073933333  |
| ARHGEF2      | -0.120666667 | -0.2345      | 0.021766667  | -0.108433333 | 0.124666667  |
| SPOP         | -0.287766667 | -0.131433333 | 0.0231       | -0.121066667 | 0.092833333  |
| MAP3K7       | 0.0951       | -0.004       | -0.142933333 | 0.223666667  | 0.039266667  |
| TMED1        | -0.179933333 | -0.102666667 | -0.109633333 | 0.0301       | 0.0254       |
| PSMG1        | 0.115833333  | -0.0041      | -0.3501      | 0.071066667  | 0.096733333  |
| SPAG1        | 0.024933333  | -0.074866667 | -0.220133333 | 0.115033333  | 0.031033333  |
| PICK1        | -0.070966667 | -0.096466667 | -0.096333333 | 0.048766667  | 0.0089       |
| LYSMD3       | -0.1707      | -0.04        | -0.226666667 | 0.010566667  | 0.097966667  |

|              |              |              |              |              |              |
|--------------|--------------|--------------|--------------|--------------|--------------|
| NOL10        | 0.0228       | 0.1337       | -0.217633333 | 0.119933333  | 0.111266667  |
| ZNF598       | -0.024166667 | -0.043833333 | -0.266833333 | 0.113        | 0.0156       |
| C19orf66     | -0.379333333 | -0.258766667 | 0.016266667  | -0.193633333 | 0.0145       |
| RWDD4A       | 0.055366667  | -0.2099      | -0.161666667 | 0.109833333  | 0.062        |
| IWS1         | 0.1525       | -0.0415      | -0.098266667 | 0.217866667  | 0.083933333  |
| AGFG1        | -0.160633333 | -0.134266667 | 0.1096       | 0.0993       | 0.193866667  |
| RNF8         | 0.025066667  | -0.0566      | -0.022333333 | 0.2432       | 0.01         |
| RNU86        | 0.1285       | -0.218666667 | 0.032333333  | 0.219866667  | 0.012566667  |
| LOC400558    | 0.094633333  | 0.084233333  | -0.116766667 | 0.2282       | 0.006866667  |
| PKP4         | 0.143366667  | -0.012833333 | -0.110966667 | 0.246966667  | 0.2512       |
| LOC100133627 | 0.2165       | -0.210766667 | -0.140766667 | -0.002133333 | 0.2694       |
| MAN1B1       | -0.202866667 | -0.25        | -0.037666667 | -0.183366667 | 0.014766667  |
| TRIM33       | -0.091866667 | -0.1537      | 0.0277       | 0.1533       | -0.032766667 |
| VPS8         | -0.230933333 | -0.178033333 | 0.0581       | -0.0746      | 0.008466667  |
| C7orf40      | 0.149        | 0.0299       | -0.161566667 | 0.2204       | 0.0917       |
| IKBKE        | -0.206633333 | -0.256266667 | -0.015233333 | -0.035466667 | -0.088366667 |
| CUEDC1       | -0.3585      | -0.224266667 | 0.212933333  | -0.2497      | 0.1387       |
| COL4A3BP     | -0.352233333 | -0.349366667 | 0.0682       | -0.053766667 | -0.052466667 |
| TFCP2        | -0.087866667 | -0.039       | -0.1151      | 0.023266667  | 0.093866667  |
| MAGEA12      | -0.022733333 | -0.144266667 | 0.013433333  | 0.1011       | 0.1593       |
| LACTB2       | -0.2091      | -0.1867      | -0.117633333 | -0.011766667 | -0.0074      |
| ACAD8        | 0.0258       | -0.250866667 | -0.162733333 | 0.1356       | -0.054633333 |
| RRP1         | 0.442866667  | 0.0349       | -0.175733333 | 0.663966667  | 0.0387       |
| HIVEP2       | 0.2041       | -0.304466667 | -0.035166667 | 0.135066667  | -0.007766667 |
| DSG2         | -0.170266667 | -0.186       | -0.121233333 | -0.083033333 | 0.0809       |
| FBXO30       | -0.071633333 | 0.097733333  | -0.150633333 | 0.092233333  | 0.147633333  |
| HAUS6        | 0.088166667  | -0.083233333 | -0.115866667 | 0.058033333  | 0.152833333  |
| DYNLRB1      | -0.2586      | -0.098566667 | 0.0183       | -0.002266667 | 0.016733333  |
| ACTR3        | -0.100166667 | -0.052866667 | -0.248066667 | 0.0653       | -0.026766667 |
| LOC728024    | -0.030566667 | 0.0344       | -0.1991      | 0.176533333  | 0.0383       |
| UNKL         | -0.035833333 | -0.050366667 | -0.136133333 | 0.0058       | 0.125933333  |
| PI4KA        | 0.004666667  | -0.075066667 | -0.0405      | 0.144866667  | 0.085166667  |
| PIPSL        | 0.004933333  | -0.175566667 | 0.043266667  | 0.1595       | 0.0875       |
| SNAPC5       | -0.1237      | -0.2933      | -0.153833333 | -0.040633333 | 0.038033333  |
| ZDHHC8       | -0.158       | -0.0297      | -0.0529      | -0.0879      | 0.1607       |
| TMEM8        | -0.1874      | -0.4181      | 0.221433333  | -0.1193      | -0.1125      |
| TRIM26       | 0.1132       | -0.087966667 | -0.144933333 | 0.142966667  | 0.109966667  |
| PRKCDBP      | -0.105966667 | -0.231966667 | -0.025266667 | -0.1059      | 0.123233333  |
| BRD7         | -0.047166667 | 0.017566667  | -0.0575      | 0.0788       | 0.141033333  |
| LOC442727    | 0.019433333  | 0.274733333  | -0.180266667 | 0.097566667  | 0.2845       |
| TRABD        | 0.085966667  | -0.031566667 | -0.063466667 | 0.184466667  | 0.128733333  |
| ENO2         | -0.116666667 | -0.2227      | 0.1157       | 0.134566667  | -0.059466667 |
| FOXK1        | 0.088233333  | -0.083366667 | 0.002066667  | 0.107633333  | 0.106833333  |
| UBAP2        | 0.1565       | -0.144133333 | -0.019666667 | 0.2505       | 0.0646       |
| KIAA2013     | 0.0716       | -0.1552      | -0.031366667 | 0.139833333  | -0.044433333 |
| CPEB2        | -0.032433333 | -0.2089      | -0.216533333 | 0.068833333  | 0.013666667  |
| ACADVL       | -0.2555      | -0.257033333 | -0.0372      | -0.0918      | -0.027033333 |

|              |              |              |              |              |              |
|--------------|--------------|--------------|--------------|--------------|--------------|
| PABPC3       | -0.221133333 | 0.026033333  | -0.331633333 | 0.084166667  | 0.052666667  |
| RPP14        | -0.100966667 | 0.0747       | -0.0789      | 0.131066667  | 0.0768       |
| LOC389293    | 0.0066       | 0.046033333  | -0.163       | 0.001666667  | 0.156        |
| C21orf81     | -0.351533333 | -0.034933333 | -0.149533333 | -0.140566667 | 0.013333333  |
| CELSR3       | -0.346733333 | -0.2078      | -0.031066667 | -0.255266667 | -0.0771      |
| LOC441253    | -0.0069      | -0.122166667 | -0.037733333 | 0.071233333  | 0.154666667  |
| LHX8         | -0.087733333 | -0.2938      | -0.138266667 | 0.022566667  | -0.134833333 |
| MORC2        | 0.038866667  | 0.082233333  | 0.004333333  | 0.095633333  | 0.222        |
| RNASEH1      | 0.075766667  | -0.037233333 | -0.350433333 | 0.0359       | 0.083733333  |
| C17orf53     | 0.065366667  | 0.0516       | -0.0848      | 0.087166667  | 0.177066667  |
| UTP14A       | 0.213266667  | -0.021266667 | -0.241       | 0.271466667  | 0.119833333  |
| C3orf64      | -0.1136      | -0.0855      | -0.027066667 | 0.064933333  | 0.090866667  |
| ZFYVE26      | -0.2178      | -0.169533333 | -0.1306      | -0.097333333 | 0.0015       |
| C15orf39     | 0.116        | 0.107666667  | -0.113633333 | 0.222133333  | 0.096266667  |
| AARSD1       | 0.063066667  | 0.0739       | -0.1194      | 0.112033333  | 0.314033333  |
| CFL2         | -0.2428      | -0.070333333 | 0.014533333  | 0.115433333  | -0.041       |
| UBA5         | -0.018533333 | -0.080366667 | -0.0948      | 0.062533333  | 0.223033333  |
| POLD2        | 0.047366667  | -0.078166667 | -0.0895      | 0.202833333  | 0.117366667  |
| CRYBB2       | 0.0989       | -0.136033333 | -0.0952      | 0.191466667  | 0.0265       |
| TRADD        | -0.174066667 | -0.2713      | -0.182433333 | -0.1833      | 0.0613       |
| LOC390530    | -0.427266667 | -0.125833333 | -0.0363      | -0.1281      | -0.150033333 |
| NEK6         | -0.035833333 | 0.092166667  | -0.139033333 | 0.2279       | 0.045366667  |
| GMIP         | -0.172866667 | -0.139266667 | 0.030066667  | -0.0795      | 0.1431       |
| ZNF525       | -0.084766667 | -0.0156      | -0.216433333 | 0.034566667  | 0.035966667  |
| PSMD11       | 0.005566667  | 0.059733333  | -0.2289      | 0.118533333  | 0.0471       |
| MAGEA3       | 0.056866667  | -0.060833333 | -0.072133333 | 0.160733333  | 0.0796       |
| RNF5P1       | -0.026433333 | -0.1343      | 0.063666667  | -0.0642      | 0.256166667  |
| TMEM138      | -0.0114      | 0.005166667  | -0.069433333 | 0.1161       | 0.1528       |
| BAT4         | -0.036533333 | 0.0353       | -0.027       | 0.0323       | 0.194266667  |
| RBM14        | 0.2875       | 0.0683       | -0.457633333 | 0.220366667  | 0.0394       |
| C14orf126    | 0.050133333  | -0.043866667 | -0.1601      | 0.069533333  | 0.136366667  |
| SNRPA1       | 0.103866667  | -0.051766667 | -0.0965      | 0.125466667  | 0.138166667  |
| LYRM7        | -0.057866667 | -0.040966667 | -0.1569      | -0.080866667 | 0.252733333  |
| DPM2         | -0.003866667 | -0.257133333 | -0.0676      | 0.0173       | 0.0124       |
| LOC100133840 | -0.079433333 | -0.112333333 | 0.074033333  | 0.0758       | -0.036266667 |
| JTB          | -0.079933333 | -0.192233333 | -0.2122      | 0.000133333  | -0.017933333 |
| DNAJC10      | -0.046533333 | -0.213966667 | -0.138266667 | -0.044133333 | -0.025033333 |
| RNU1G2       | 0.023133333  | -0.129433333 | 0.075566667  | 0.408966667  | 0.034533333  |
| LOC341965    | -0.0252      | 0.060866667  | -0.066233333 | 0.24         | 0.1227       |
| LMAN1        | -0.105933333 | -0.124766667 | -0.0206      | 0.045166667  | 0.028766667  |
| EPR1         | 0.2422       | -0.030066667 | -0.189633333 | 0.1593       | 0.252066667  |
| LOC100132493 | -0.1733      | 0.2618       | -0.311133333 | 0.017066667  | 0.263533333  |
| NAT10        | 0.112366667  | -0.039933333 | -0.032166667 | 0.076966667  | 0.1944       |
| NDRG4        | -0.508166667 | -0.275333333 | 0.132933333  | -0.287866667 | 0.000333333  |
| ARMCX5       | -0.034066667 | -0.083266667 | -0.0909      | 0.069133333  | 0.1178       |
| MAP3K14      | 0.1137       | 0.011866667  | -0.097933333 | 0.262366667  | 0.098933333  |
| WDR51B       | -0.1243      | -0.1806      | -0.0497      | 0.084866667  | 0.114666667  |

|              |              |              |              |              |              |
|--------------|--------------|--------------|--------------|--------------|--------------|
| TOX4         | -0.176333333 | -0.061233333 | -0.211366667 | -0.043433333 | 0.079633333  |
| CENTD2       | -0.001166667 | -0.0576      | -0.183433333 | 0.124166667  | -0.092733333 |
| TMEM55B      | -0.0155      | -0.198       | -0.1239      | 0.111666667  | 0.037933333  |
| ZNHIT1       | -0.280533333 | -0.123066667 | 0.0128       | -0.150633333 | 0.039133333  |
| LOC728014    | -0.1056      | -0.0325      | -0.213133333 | 0.069933333  | -0.034266667 |
| LOC286467    | -0.0248      | -0.098933333 | -0.226266667 | 0.045466667  | 0.127433333  |
| THAP7        | 0.210566667  | 0.028266667  | -0.035333333 | 0.0767       | 0.136666667  |
| TRAF4        | 0.348266667  | -0.0134      | -0.087533333 | 0.198166667  | 0.216166667  |
| ZNF721       | -0.0721      | -0.030033333 | -0.058366667 | 0.200133333  | -0.009       |
| WWP2         | -0.073966667 | -0.147366667 | -0.1372      | 0.159        | -0.022733333 |
| VPS26        | -0.3348      | 0.169566667  | -0.3133      | -0.129233333 | 0.251833333  |
| C20orf20     | 0.105333333  | -0.002266667 | -0.0572      | 0.135633333  | 0.117233333  |
| ZFYVE27      | 0.158633333  | -0.2051      | -0.119966667 | 0.122766667  | 0.044633333  |
| RHOG         | -0.009966667 | -0.106466667 | -0.0172      | 0.1019       | 0.084433333  |
| CCND1        | 0.4971       | -0.1318      | -0.003233333 | 0.451        | 0.023666667  |
| SNORD16      | 0.369633333  | 0.143866667  | -0.317866667 | 0.255733333  | 0.3923       |
| LOC645688    | -0.282633333 | -0.2284      | -0.0316      | -0.056566667 | 0.0077       |
| U2AF1        | 0.067733333  | 0.235966667  | -0.338233333 | 0.284866667  | 0.252066667  |
| PFKFB4       | -0.460566667 | -0.3377      | 0.5699       | -0.207433333 | -0.0598      |
| ZC3H3        | 0.0198       | -0.0414      | -0.1394      | 0.1179       | 0.088133333  |
| EXOG         | -0.009633333 | -0.0174      | -0.082066667 | 0.297533333  | -0.0069      |
| JMJD6        | 0.187466667  | 0.067933333  | -0.017933333 | 0.4074       | 0.061266667  |
| ZBTB40       | -0.067       | -0.1468      | -0.013433333 | -0.048033333 | -0.001466667 |
| NCLN         | 0.0982       | 0.041666667  | -0.147133333 | 0.2283       | 0.1583       |
| GTF3C2       | 0.101066667  | 0.0339       | -0.2122      | 0.1309       | 0.097066667  |
| PSMA6        | -0.010133333 | -0.0931      | -0.135766667 | 0.1592       | 0.029633333  |
| UBE2Z        | -0.0721      | -0.175133333 | 0.051766667  | 0.182733333  | -0.0268      |
| C10orf137    | 0.068866667  | -0.066533333 | 0.0285       | 0.2234       | 0.178233333  |
| MRTO4        | 0.3412       | -0.0258      | -0.076066667 | 0.454166667  | 0.1643       |
| TRIM56       | -0.123266667 | -0.193366667 | -0.043233333 | 0.007933333  | -0.063266667 |
| PARD6A       | -0.226133333 | 0.0068       | -0.083866667 | -0.055033333 | 0.211766667  |
| SAFB2        | 0.1674       | 0.033233333  | -0.2879      | 0.2297       | 0.1435       |
| C6orf1       | -0.278366667 | -0.086366667 | 0.0417       | -0.009133333 | 0.040266667  |
| RAB1A        | -0.073333333 | 0.044333333  | -0.097033333 | 0.113866667  | 0.0685       |
| LOC729409    | -0.1156      | 0.029533333  | -0.206233333 | -0.033933333 | 0.163466667  |
| C5orf22      | 0.1421       | -0.0397      | -0.054266667 | 0.128966667  | 0.133066667  |
| DTX3L        | -0.131966667 | 0.000366667  | -0.2346      | -0.018166667 | 0.2003       |
| CSAG1        | -0.1676      | -0.1767      | -0.1119      | -0.050633333 | 0.0365       |
| XRCC4        | -0.085566667 | 0.229066667  | -0.090833333 | 0.091833333  | 0.3079       |
| IFIT3        | -0.063033333 | -0.142233333 | -0.044733333 | 0.032333333  | 0.086266667  |
| FAM21D       | -0.2872      | -0.2155      | -0.198666667 | -0.087233333 | -0.023066667 |
| RAB2B        | -0.297533333 | -0.1201      | 0.1621       | -0.0774      | 0.059366667  |
| LEPR         | -0.215166667 | -0.0816      | 0.0251       | 0.130066667  | -0.085766667 |
| ERGIC2       | -0.2268      | 0.031766667  | -0.041533333 | 0.079633333  | 0.204266667  |
| LOC100129960 | -0.267433333 | 0.017633333  | -0.1308      | -0.061066667 | 0.103433333  |
| LOC729317    | -0.031433333 | -0.064166667 | -0.053       | 0.120333333  | 0.0862       |
| F3           | 0.659233333  | 0.064233333  | -0.349666667 | 0.657066667  | 0.117        |

|              |              |              |              |              |              |
|--------------|--------------|--------------|--------------|--------------|--------------|
| DYRK3        | 0.0935       | -0.084266667 | -0.1065      | 0.2173       | 0.1034       |
| MRFAP1       | 0.089366667  | -0.086633333 | -0.123133333 | 0.1498       | 0.171066667  |
| ATXN7L2      | 0.246266667  | -0.0103      | -0.135       | 0.378333333  | 0.086833333  |
| GRIPAP1      | -0.101833333 | 0.6655       | -0.126233333 | 0.130266667  | 0.359266667  |
| RGMB         | 0.214        | -0.052066667 | -0.098866667 | 0.356866667  | -0.008       |
| MLX          | 0.076733333  | -0.040833333 | 0.032066667  | 0.1502       | 0.171166667  |
| PSMC2        | 0.027966667  | -0.024833333 | -0.153366667 | 0.182133333  | 0.0619       |
| RPS6KA4      | 0.2554       | -0.078966667 | -0.353833333 | 0.209433333  | 0.0393       |
| HSPC111      | 0.423666667  | 0.145966667  | -0.141533333 | 0.466033333  | 0.1873       |
| PIP4K2A      | -0.131466667 | -0.080566667 | -0.206066667 | -0.082       | 0.003666667  |
| SEC22B       | -0.193766667 | -0.155       | 0.055666667  | 0.014833333  | 6.67E-05     |
| PCK2         | -0.3053      | -0.215933333 | -0.1563      | -0.148933333 | -0.064233333 |
| DIMT1L       | 0.423466667  | -0.084133333 | -0.140166667 | 0.439033333  | 0.1883       |
| SAGE1        | -0.261733333 | -0.148666667 | -0.033433333 | -0.1619      | -0.070366667 |
| LOC728034    | -0.115933333 | -0.030866667 | -0.0138      | 0.1072       | 0.043366667  |
| UBE2D2       | 0.0071       | 0.047633333  | -0.199766667 | 0.180033333  | 0.0854       |
| PCSK5        | -0.140533333 | -0.1733      | -0.123833333 | 0.0189       | -0.087833333 |
| LOC100131737 | -0.224366667 | 0.009066667  | 0.050233333  | -0.013733333 | 0.1103       |
| DMRTA1       | -0.2055      | -0.0331      | -0.0365      | -0.020466667 | 0.022166667  |
| TRIO         | 0.0218       | -0.023533333 | -0.1389      | 0.2084       | -0.0014      |
| SLC6A8       | -0.078133333 | -0.340766667 | -0.134       | 0.029766667  | -0.049666667 |
| C21orf45     | 0.1123       | 0.195933333  | -0.0774      | 0.2544       | 0.279866667  |
| RRAGC        | -0.1721      | -0.266066667 | -0.287166667 | 0.040133333  | -0.260466667 |
| C17orf79     | 0.0227       | -0.042066667 | -0.1257      | 0.2666       | 0.046266667  |
| LOC728257    | 0.103566667  | 0.0309       | -0.006966667 | 0.326866667  | 0.2251       |
| CSNK2A1      | 0.019933333  | -0.049833333 | -0.010366667 | 0.265033333  | 0.131033333  |
| GOSR1        | 0.045866667  | -0.2244      | 0.055533333  | 0.192266667  | -0.036533333 |
| PDS5B        | 0.0383       | 0.074133333  | -0.142866667 | 0.0987       | 0.176333333  |
| GALNT14      | 0.107566667  | 0.168033333  | -0.048833333 | 0.197066667  | 0.296633333  |
| MGST2        | -0.521833333 | -0.0784      | 0.045933333  | -0.199733333 | 0.0478       |
| SHCBP1       | 0.088166667  | 0.174066667  | -0.0586      | 0.217266667  | 0.321766667  |
| GABRE        | -0.121       | 0.078333333  | -0.083466667 | -0.0003      | 0.125233333  |
| PGK1         | 0.017433333  | -0.114933333 | -0.0516      | 0.1153       | 0.0711       |
| UXT          | 0.190433333  | -0.027733333 | -0.221333333 | 0.141866667  | 0.176133333  |
| STOX2        | -0.1309      | -0.024066667 | -0.211233333 | -0.057733333 | 0.172966667  |
| C7orf42      | 0.2124       | -0.045966667 | -0.1165      | 0.2063       | 0.140333333  |
| ANAPC10      | 0.073933333  | -0.0074      | -0.057233333 | 0.2128       | 0.128533333  |
| SH3BGRL      | -0.2397      | -0.4128      | 0.131066667  | -0.155333333 | 0.012066667  |
| CBWD3        | 0.006933333  | 0.0184       | -0.0679      | 0.1944       | 0.147433333  |
| BICD2        | 0.1114       | -0.1349      | 0.139366667  | 0.2668       | 0.1429       |
| FAM72A       | 0.033166667  | 0.1314       | -0.194366667 | 0.219933333  | 0.2364       |
| RB1CC1       | -0.353433333 | -0.273633333 | 0.013966667  | -0.0927      | -0.046933333 |
| PAPOLA       | 0.0155       | 0.002533333  | -0.082933333 | 0.130133333  | 0.151733333  |
| LOC100128440 | 0.039        | -0.227566667 | 0.004266667  | 0.1427       | 0.068666667  |
| ANTXR2       | 0.056466667  | -0.041466667 | 0.093666667  | 0.062633333  | 0.1744       |
| USP1         | 0.184166667  | -0.011866667 | -0.109933333 | 0.247933333  | 0.184633333  |
| CCNC         | 0.1713       | 0.110766667  | 0.012433333  | 0.2725       | 0.142833333  |

|              |              |              |              |              |              |
|--------------|--------------|--------------|--------------|--------------|--------------|
| ABHD5        | 0.1529       | 0.073266667  | -0.258       | 0.2016       | 0.0852       |
| AFTPH        | -0.139266667 | -0.1584      | -0.127466667 | -0.0144      | 0.169066667  |
| SCG2         | 0.004066667  | -0.0088      | 0.025266667  | -0.0529      | 0.170866667  |
| CROP         | 0.2068       | 0.0626       | -0.2137      | 0.331366667  | 0.240766667  |
| LOC100130886 | 0.036066667  | 0.046866667  | -0.047133333 | -0.028       | 0.246833333  |
| ZNF839       | -0.1137      | -0.146266667 | -0.1918      | -0.0025      | -0.0486      |
| TMED5        | -0.141266667 | -0.184       | -0.0202      | -0.017033333 | -0.005933333 |
| TMEM159      | -0.114266667 | -0.132866667 | -0.080233333 | -0.048133333 | 0.013633333  |
| SDF4         | -0.097433333 | -0.214333333 | -0.060666667 | -0.050966667 | 0.0538       |
| ALG1         | 0.2158       | -0.145033333 | -0.096833333 | 0.227733333  | 0.111733333  |
| LOC650037    | -0.106766667 | 0.0608       | -0.086833333 | -0.0065      | 0.1938       |
| RPGR         | 0.030433333  | -0.1628      | 0.020266667  | 0.119066667  | 0.091433333  |
| C9orf100S    | 0.007733333  | -0.198633333 | -0.2998      | 0.0992       | -0.0667      |
| PDP2         | -0.012733333 | 0.121766667  | -0.032733333 | 0.1774       | 0.253266667  |
| FUBP1        | 0.130633333  | -0.079233333 | 0.1093       | 0.3745       | 0.2337       |
| TCEA3        | -0.096266667 | -0.093       | -0.1062      | -0.014266667 | 0.140033333  |
| SP100        | -0.0533      | -0.0999      | -0.014066667 | 0.067366667  | -0.0256      |
| SHARPIN      | -0.123266667 | -0.0409      | -0.0932      | 0.063833333  | 0.000366667  |
| GNL2         | 0.3463       | 0.025533333  | -0.191466667 | 0.337266667  | 0.097066667  |
| LOC731007    | -0.0978      | -0.1702      | 0.0417       | 0.093666667  | -0.042133333 |
| SAR1A        | -0.199066667 | 0.059266667  | -0.162466667 | 0.147933333  | 0.027633333  |
| CABYR        | -0.081666667 | 0.091166667  | -0.1794      | 0.080266667  | 0.174766667  |
| AHI1         | -0.189133333 | -0.235866667 | 0.091666667  | -0.0472      | -0.0036      |
| TWIST2       | 0.213933333  | -0.0206      | -0.037366667 | 0.212933333  | 0.124833333  |
| NELF         | -0.090433333 | 0.0479       | -0.145733333 | 0.1274       | 0.084866667  |
| MGC4677      | 0.5751       | -0.017266667 | 0.003166667  | 0.5741       | 0.2296       |
| LOC643233    | 0.222566667  | 0.118166667  | -0.1653      | 0.118333333  | 0.339766667  |
| TBC1D8       | 0.020733333  | 0.0196       | -0.0294      | -0.0087      | 0.1933       |
| KIAA0240     | -0.3737      | -0.248533333 | -0.046366667 | -0.125866667 | -0.027066667 |
| EPB41L3      | -0.0835      | -0.0856      | -0.056966667 | 0.029        | 0.0984       |
| LOC100132739 | -0.042933333 | -0.038566667 | -0.158766667 | 0.109766667  | 0.153333333  |
| ME3          | -0.0615      | -0.114666667 | -0.128233333 | 0.028633333  | -0.020633333 |
| LOC644404    | 0.0175       | 0.053833333  | -0.1507      | 0.126933333  | 0.024166667  |
| DCBLD1       | -0.129333333 | -0.269933333 | -0.092366667 | 0.065766667  | -0.095666667 |
| NKX3-1       | 0.167466667  | 0.077566667  | -0.2099      | 0.376833333  | 0.1553       |
| MAP1LC3B     | -0.322866667 | -0.2846      | -0.081866667 | -0.133366667 | -0.004666667 |
| ANKRD13D     | -0.102233333 | 0.015933333  | -0.068633333 | 0.064633333  | -0.015033333 |
| SNX30        | -0.1177      | -0.018533333 | -0.084766667 | 0.172066667  | -0.0029      |
| ATXN1L       | 0.051        | 0.0244       | -0.243533333 | 0.238033333  | -0.0055      |
| TAF9         | -0.010333333 | 0.026633333  | -0.318866667 | 0.024766667  | 0.063266667  |
| MAFF         | 0.2511       | 0.5473       | -0.109733333 | 0.4485       | 0.362366667  |
| LOC389787    | -0.305433333 | -0.153066667 | -0.0056      | -0.050533333 | -0.031666667 |
| CISD1        | 0.061133333  | -0.035       | -0.100433333 | 0.224966667  | 0.104133333  |
| STAT4        | -0.351       | -0.117733333 | -0.152933333 | -0.183933333 | -0.077366667 |
| SLC25A4      | -0.1212      | -0.2833      | -0.183833333 | -0.095433333 | 0.022766667  |
| EIF1B        | -0.1011      | -0.0476      | -0.1498      | -0.009333333 | 0.184266667  |
| LOC644655    | -0.0146      | -0.079833333 | -0.055933333 | 0.0344       | 0.0948       |

|              |              |              |              |              |              |
|--------------|--------------|--------------|--------------|--------------|--------------|
| SLC1A3       | -0.258033333 | 0.0034       | 0.021766667  | 0.027533333  | 0.1537       |
| MID1         | 0.229066667  | 0.038466667  | -0.309566667 | 0.279833333  | -0.0007      |
| RPS24        | 0.271833333  | -0.1531      | -0.180633333 | 0.199566667  | 0.1307       |
| TUBG2        | -0.290733333 | -0.231733333 | 0.1316       | -0.129366667 | -0.1609      |
| CCNT1        | -0.1168      | -0.267966667 | 0.144366667  | 0.050433333  | -0.133566667 |
| GCDH         | -0.031133333 | -0.1861      | -0.270066667 | -0.077333333 | 0.0732       |
| TAF1C        | 0.0018       | -0.018433333 | -0.145166667 | 0.068966667  | 0.058066667  |
| SLFN5        | -0.413333333 | -0.254766667 | -0.0721      | -0.178533333 | -0.028966667 |
| TANK         | -0.250066667 | -0.306966667 | 0.066966667  | -0.109033333 | -0.034566667 |
| GLTP         | -0.058333333 | -0.147133333 | -0.162266667 | -0.0483      | 0.0279       |
| LOC728889    | -0.028833333 | 0.0808       | -0.088366667 | 0.429366667  | 0.033166667  |
| ZCCHC7       | -0.3048      | -0.1103      | -0.108333333 | -0.201666667 | 0.149133333  |
| CTSA         | -0.277033333 | -0.248433333 | 0.141333333  | -0.107433333 | 0.004466667  |
| EI24         | 0.066433333  | 0.099733333  | -0.282066667 | 0.151033333  | 0.105433333  |
| USP41        | -0.090133333 | 0.0207       | -0.076766667 | 0.002        | 0.124133333  |
| C19orf50     | -0.018966667 | -0.0952      | -0.0722      | 0.096566667  | 0.0458       |
| IL10RB       | -0.791533333 | -0.2556      | 0.126866667  | -0.445533333 | -0.046833333 |
| TEX10        | 0.2146       | 0.055433333  | -0.042266667 | 0.3122       | 0.0872       |
| PITPNB       | 0.191933333  | -0.006366667 | -0.084533333 | 0.294633333  | 0.092866667  |
| NDUFA8       | -0.246066667 | -0.109166667 | -0.066833333 | -0.151033333 | 0.1137       |
| TRAP1        | 0.0702       | -0.0079      | -0.0264      | 0.196533333  | 0.1073       |
| FAM195A      | -0.023       | -0.066333333 | -0.081066667 | 0.084366667  | 0.1721       |
| GHITM        | -0.2091      | -0.176033333 | -0.090633333 | -0.0464      | 0.029433333  |
| CCDC93       | 0.0101       | -0.1399      | -0.151133333 | 0.084866667  | -0.0591      |
| SBF1         | -0.072566667 | -0.104233333 | -0.0831      | -0.062066667 | 0.097966667  |
| SFPQ         | 0.0711       | 0.010266667  | 0.104366667  | 0.385266667  | 0.049633333  |
| SUV39H1      | 0.154033333  | 0.0893       | -0.210066667 | 0.2889       | 0.109        |
| AKIRIN2      | -0.239633333 | -0.040166667 | -0.0652      | -0.065533333 | 0.049866667  |
| MTCH2        | -0.108966667 | -0.044766667 | -0.104233333 | 0.113666667  | -0.091033333 |
| KIAA0408     | -0.1697      | 0.453533333  | -0.2023      | -0.054233333 | 0.3531       |
| SPRY2        | -0.078333333 | -0.082866667 | 0.337233333  | -0.002266667 | 0.2442       |
| C18orf25     | 0.264866667  | -0.006       | -0.177066667 | 0.343666667  | 0.077766667  |
| BRD7P2       | 0.107533333  | -0.051033333 | -0.005433333 | 0.154366667  | 0.102333333  |
| ACACB        | -0.1557      | -0.081433333 | -0.209133333 | -0.074066667 | -0.098133333 |
| YIPF5        | -0.5383      | -0.229933333 | 0.056666667  | -0.346066667 | 0.161        |
| C17orf51     | 0.0043       | 0.013133333  | -0.151333333 | 0.166066667  | 0.0628       |
| LOC255187    | 0.249233333  | -0.0599      | 0.035533333  | 0.272866667  | 0.231233333  |
| C7orf43      | -0.111966667 | -0.0352      | -0.128133333 | -0.005233333 | 0.0119       |
| CHM          | -0.201533333 | -0.276066667 | -0.079733333 | -0.091       | -0.0612      |
| CGRRF1       | -0.0694      | -0.046366667 | -0.217266667 | 0.032233333  | 0.0228       |
| LOC442517    | 0.033466667  | 0.1345       | -0.076333333 | 0.151766667  | 0.309        |
| PSAT1        | -0.108333333 | -0.191166667 | -0.329766667 | -0.1117      | 0.009333333  |
| DDX41        | 0.023333333  | -0.119866667 | -0.041533333 | 0.101333333  | -0.037566667 |
| LOC100133673 | 0.1387       | -0.064633333 | -0.083166667 | 0.1187       | 0.208466667  |
| NKTR         | 0.046466667  | -0.0042      | 0.094333333  | 0.332266667  | 0.025866667  |
| CANT1        | 0.1631       | -0.137666667 | -0.015233333 | 0.132466667  | 0.0532       |
| ABTB2        | -0.122033333 | 0.054466667  | 0.031133333  | 0.0261       | 0.149866667  |

|              |              |              |              |              |              |
|--------------|--------------|--------------|--------------|--------------|--------------|
| WDR77        | 0.2099       | 0.127433333  | -0.224066667 | 0.311666667  | 0.1246       |
| LOC388796    | 0.066933333  | -0.110433333 | -0.086433333 | 0.1237       | 0.0351       |
| SLC25A5      | 0.0427       | -0.136       | -0.017366667 | 0.032233333  | 0.107833333  |
| H2AFZ        | 0.1531       | -0.069233333 | -0.126866667 | 0.162633333  | 0.115        |
| SFRS2B       | 0.0439       | -0.1298      | -0.171566667 | -0.038066667 | 0.1546       |
| SIRT5        | -0.155266667 | -0.197933333 | -0.022933333 | -0.052       | 0.011566667  |
| LOC100132439 | -0.1477      | -0.087366667 | -0.149366667 | 0.001333333  | -0.031066667 |
| LOC728126    | -0.0762      | 0.021133333  | -0.1972      | 0.1143       | 0.0281       |
| BCAS2        | -0.071666667 | 0.184466667  | -0.320633333 | 0.041066667  | 0.150066667  |
| KRI1         | 0.193733333  | -0.045166667 | 0.0932       | 0.2789       | 0.0557       |
| NOL12        | 0.005        | 0.0733       | -0.210733333 | 0.152133333  | 0.177766667  |
| WDR60        | -0.252866667 | -0.204866667 | 0.034433333  | -0.1809      | -0.0333      |
| LOC100134108 | -0.114566667 | 0.0367       | -0.257366667 | -0.054733333 | 0.024        |
| CBX8         | 0.107133333  | -0.0841      | 0.0242       | 0.280233333  | -0.016866667 |
| LOC647958    | -0.0518      | -0.059133333 | -0.0807      | -0.0102      | 0.2578       |
| MBNL2        | -0.3049      | -0.5236      | -0.229       | -0.296166667 | 0.057466667  |
| SPR          | -0.117733333 | 0.045533333  | -0.049133333 | 0.017866667  | 0.017233333  |
| STK25        | -0.087266667 | -0.0334      | 0.002866667  | 0.020666667  | 0.1728       |
| BCL7B        | 0.293366667  | -0.013066667 | 0.021266667  | 0.459566667  | 0.0139       |
| TARS         | -0.130833333 | -0.074866667 | -0.124666667 | 0.033766667  | -0.054066667 |
| LOC644617    | 0.0433       | -0.010166667 | -0.116466667 | 0.2559       | 0.064766667  |
| C7orf25      | -0.1532      | -0.1159      | -0.210766667 | -0.092833333 | -0.103166667 |
| ATXN2        | -0.164166667 | -0.1522      | 0.0956       | -0.0279      | 0.052733333  |
| RNMTL1       | 0.066066667  | 0.036866667  | -0.0942      | 0.221133333  | 0.171333333  |
| HNRNPD       | 0.1847       | -0.0214      | -0.024866667 | 0.219366667  | 0.198533333  |
| BAG5         | 0.1025       | 0.0313       | -0.1914      | 0.2382       | 0.0694       |
| PXN          | -0.030166667 | 0.078066667  | 0.256933333  | 0.108266667  | 0.1354       |
| ECHS1        | -0.2101      | -0.1324      | 0.0664       | -0.084066667 | 0.046566667  |
| LOC651697    | -0.142233333 | -0.033033333 | -0.0994      | -0.060333333 | 0.0225       |
| NLGN4X       | -0.2509      | -0.269433333 | 0.107833333  | -0.184666667 | 0.007766667  |
| LOC643550    | -0.235566667 | 0.2247       | 0.034333333  | 0.065866667  | 0.152333333  |
| NDC80        | -0.239733333 | 0.218466667  | -0.0242      | 0.0341       | 0.089333333  |
| ITGB5        | -0.155366667 | 0.028933333  | 0.242966667  | -0.0256      | 0.238933333  |
| INPPL1       | -0.147133333 | -0.1815      | -0.026366667 | -0.019933333 | 0.0518       |
| SCAMP2       | -0.190666667 | -0.000533333 | -0.025266667 | 0.158566667  | 0.0264       |
| ANKRD37      | -0.335766667 | -0.275633333 | 0.458666667  | -0.233233333 | 0.140733333  |
| NLE1         | 0.2606       | -0.038166667 | -0.1308      | 0.378166667  | 0.1195       |
| RUFY3        | -0.181933333 | -0.199733333 | 0.0384       | -0.0805      | 0.051433333  |
| C2orf18      | -0.2049      | -0.293933333 | -0.0266      | 0.004666667  | -0.0446      |
| ABCF1        | 0.104866667  | -0.091766667 | 0.000133333  | 0.228166667  | 0.031533333  |
| POLG2        | -0.132533333 | 0.0429       | 0.003866667  | 0.017366667  | 0.089933333  |
| PCNP         | -0.069533333 | -0.131933333 | -0.0698      | 0.041566667  | 0.1146       |
| LOC100132707 | -0.292133333 | -0.096       | -0.020766667 | -0.142633333 | 0.122266667  |
| UBE2C        | 0.084766667  | 0.060933333  | 0.159066667  | 0.292633333  | 0.105066667  |
| ZNF684       | 0.168733333  | -0.112       | -0.0366      | 0.110366667  | 0.0522       |
| C4orf16      | 0.048533333  | -0.1157      | 0.082233333  | 0.136        | 0.2115       |
| MRI1         | 0.037533333  | -0.084       | 0.0369       | 0.240633333  | 0.1631       |



|              |              |              |              |              |              |
|--------------|--------------|--------------|--------------|--------------|--------------|
| BRMS1        | 0.1742       | 0.053666667  | -0.2369      | 0.1503       | 0.204033333  |
| SNORA84      | -0.0199      | -0.080966667 | -0.2497      | 0.0125       | -0.032366667 |
| C19orf60     | -0.171966667 | -0.159266667 | -0.104033333 | 0.0011       | 0.032166667  |
| RPL7L1       | 0.090866667  | -0.057133333 | 0.035666667  | 0.222133333  | 0.0847       |
| LOC100130224 | 0.2336       | -0.0663      | -0.155633333 | 0.198033333  | 0.080133333  |
| C21orf59     | 0.022633333  | -0.050833333 | 0.015666667  | 0.1979       | 0.2245       |
| PECI         | -0.079233333 | -0.059133333 | -0.0758      | -0.0258      | 0.0901       |
| VAT1         | -0.5758      | -0.2211      | 0.154233333  | -0.325633333 | -0.0734      |
| DAD1         | -0.0535      | -0.2363      | 0.027533333  | 0.069366667  | 0.049333333  |
| PPP3CA       | -0.284766667 | 0.0601       | -0.0814      | -0.085233333 | 0.139966667  |
| SDCCAG3      | 0.2004       | -0.0707      | -0.183766667 | 0.209733333  | 0.076233333  |
| MAGEC2       | -0.048633333 | -0.2908      | 0.035533333  | -0.068166667 | 0.019566667  |
| DUSP14       | 0.1323       | -0.161933333 | -0.178533333 | 0.278433333  | -0.067566667 |
| LOC728698    | 0.220966667  | -0.023966667 | 0.007566667  | 0.2324       | 0.264133333  |
| PWP2         | 0.0714       | 0.0823       | -0.066466667 | 0.098733333  | 0.181866667  |
| RAB6A        | -0.1463      | 0.002066667  | -0.1959      | -0.046966667 | 0.202166667  |
| FLJ36848     | -0.077066667 | 0.025033333  | -0.027433333 | -0.0705      | 0.071666667  |
| CACHD1       | 0.054866667  | -0.217166667 | -0.0589      | 0.004466667  | 0.204866667  |
| ZNF490       | -0.1382      | -0.246266667 | -0.1214      | -0.076766667 | 0.043533333  |
| SUPV3L1      | 0.086233333  | -0.068866667 | -0.141933333 | 0.167566667  | 0.029533333  |
| B4GALT7      | -0.179833333 | -0.197333333 | 0.050133333  | 0.052233333  | -0.0062      |
| LOC643176    | -0.049666667 | 0.105633333  | -0.1417      | 0.178433333  | 0.182833333  |
| LOC100009676 | -0.080766667 | -0.0957      | -0.195866667 | -0.020633333 | 0.025533333  |
| UBXN4        | -0.131633333 | -0.388966667 | 0.043133333  | -0.062333333 | -0.199866667 |
| SLC25A3      | 0.155566667  | 0.082        | -0.032466667 | 0.243433333  | 0.147566667  |
| C9orf78      | 0.009133333  | -0.149       | -0.098333333 | 0.098933333  | 0.131666667  |
| GPBP1        | -0.080366667 | 0.023433333  | -0.097633333 | 0.165466667  | 0.097733333  |
| VPS35        | -0.033266667 | -0.039433333 | -0.153333333 | 0.003166667  | 0.179933333  |
| TEAD4        | 0.245433333  | -0.019       | -0.237766667 | 0.104066667  | 0.1605       |
| HSP90AB4P    | -0.111633333 | 0.054933333  | 0.171533333  | 0.3451       | 0.069666667  |
| UBA6         | -0.121333333 | -0.2847      | 0.083166667  | -0.108       | 0.256066667  |
| LOC339290    | -0.187633333 | -0.132533333 | -0.133466667 | 0.019        | -0.0939      |
| EIF3A        | -0.094       | -0.1522      | 0.0729       | 0.118766667  | 0.097166667  |
| MTF2         | 0.030266667  | 0.1511       | -0.0217      | 0.218866667  | 0.165066667  |
| GALK2        | -0.214       | -0.200333333 | 0.0783       | -0.09        | -0.027966667 |
| KCTD21       | 0.015766667  | -0.088933333 | -0.218166667 | -0.024033333 | 0.0455       |
| MRPL21       | 0.114366667  | -0.078266667 | -0.192833333 | 0.131233333  | 0.0655       |
| FAM160B1     | 0.5399       | -0.005166667 | -0.1207      | 0.743633333  | 0.017366667  |
| CD83         | 0.392466667  | 0.108133333  | 0.033633333  | 0.4531       | 0.254633333  |
| KDSR         | -0.021366667 | 0.039466667  | -0.017466667 | 0.161        | 0.105966667  |
| LOC644619    | -0.020566667 | -0.148433333 | 0.099533333  | 0.1497       | 0.088        |
| VPS37C       | 0.030666667  | -0.1029      | -0.1098      | 0.077533333  | 0.066433333  |
| BRF2         | 0.149433333  | -0.011333333 | -0.2189      | 0.340833333  | -0.0381      |
| PDCD7        | -0.078566667 | 0.071666667  | -0.2087      | -0.003433333 | -0.004133333 |
| NXT2         | -0.104433333 | -0.0328      | -0.385066667 | -0.081966667 | 0.148066667  |
| THOC3        | 0.118833333  | 0.069033333  | -0.060233333 | 0.2962       | 0.102366667  |
| SNORD25      | 0.0824       | 0.045166667  | -0.224733333 | 0.1256       | 0.0405       |

|              |              |              |              |              |              |
|--------------|--------------|--------------|--------------|--------------|--------------|
| LRRC59       | 0.074766667  | 0.2062       | -0.253233333 | 0.2184       | 0.274333333  |
| PPPDE2       | -0.159533333 | -0.056233333 | 0.009266667  | 0.100533333  | 0.082133333  |
| VAMP8        | -0.349733333 | -0.2159      | 0.093633333  | -0.060166667 | -0.0572      |
| SYDE1        | 0.495333333  | 0.035566667  | -0.071066667 | 0.605033333  | 0.1443       |
| EXOSC1       | 0.034766667  | -0.1414      | -0.157066667 | 0.111533333  | -0.047133333 |
| COBL         | 0.2182       | -0.110533333 | -0.480766667 | 0.086766667  | 0.053466667  |
| C13orf25     | 0.270933333  | 0.126533333  | -0.0771      | 0.151833333  | 0.2321       |
| RTN4IP1      | -0.130066667 | 0.089866667  | -0.148233333 | -0.031       | 0.147033333  |
| RPS25        | 0.065433333  | -0.206133333 | -0.0463      | 0.077966667  | 0.049466667  |
| UTP6         | -0.016233333 | 0.0443       | -0.0567      | 0.101033333  | 0.071933333  |
| TRIT1        | -0.1436      | 0.079066667  | 0.027333333  | 0.2347       | 0.009633333  |
| LOC100132863 | 0.0564       | 0.033466667  | -0.258033333 | 0.1312       | 0.2112       |
| NT5C2        | -0.076433333 | -0.2299      | -0.184666667 | 0.103633333  | -0.041866667 |
| SHMT2        | -0.129466667 | -0.1498      | -0.2621      | -0.0417      | -0.086833333 |
| MOBK1B       | 0.030766667  | 0.096766667  | -0.1225      | 0.223333333  | -0.012766667 |
| CDC45L       | 0.2906       | -0.0805      | -0.247166667 | 0.172766667  | 0.118666667  |
| NUDT5        | -0.079466667 | 0.0449       | -0.018933333 | 0.019766667  | 0.149366667  |
| PGGT1B       | 0.228233333  | 0.029433333  | -0.2448      | 0.323933333  | 0.028066667  |
| SCRN1        | -0.096566667 | -0.2041      | 0.1728       | 0.054366667  | 0.112333333  |
| NDEL1        | 0.1682       | -0.141066667 | -0.044266667 | 0.199266667  | 0.050033333  |
| SLC35B3      | -0.118033333 | -0.173166667 | -0.0577      | -0.004866667 | -0.031133333 |
| C1orf107     | 0.0883       | -0.008666667 | -0.176333333 | 0.1285       | 0.0014       |
| METTL6       | -0.010466667 | 0.066733333  | -0.169166667 | 0.1302       | 0.089733333  |
| BMP2         | 0.126566667  | -0.242433333 | -0.131833333 | 0.106366667  | -0.039733333 |
| VPS26A       | -0.172566667 | -0.0312      | -0.0877      | -0.014       | 0.048166667  |
| SR140        | 0.273266667  | -0.1894      | -0.040333333 | 0.3227       | 0.047133333  |
| STRN3        | -0.062866667 | -0.037966667 | 0.0933       | 0.160533333  | 0.145166667  |
| LOC285074    | -0.0768      | -0.029766667 | -0.106166667 | 0.0762       | 0.002433333  |
| ADCK1        | -0.305033333 | -0.0735      | -0.145866667 | -0.1124      | 0.052166667  |
| FAM100B      | -0.2967      | 0.1173       | 0.072266667  | 0.0063       | 0.061733333  |
| PSMB2        | 0.025733333  | -0.044333333 | -0.054333333 | 0.084966667  | 0.144333333  |
| PLEKHM1      | -0.346533333 | -0.1958      | -0.0468      | -0.0882      | -0.066666667 |
| LOC643870    | -0.308766667 | -0.010866667 | -0.1935      | -0.0966      | 0.0981       |
| ARSA         | -0.0374      | -0.092633333 | -0.023266667 | 0.097966667  | 0.077133333  |
| HSPB1        | -0.392       | -0.0724      | 0.2275       | -0.185233333 | 0.187966667  |
| PARVB        | -0.045833333 | -0.054233333 | -0.0153      | 0.108233333  | -0.005933333 |
| GPBP1L1      | -0.139966667 | 0.111333333  | -0.271933333 | 0.0893       | 0.0318       |
| RPL18A       | 0.0148       | -0.148833333 | -0.0642      | 0.049433333  | 0.023666667  |
| F8A1         | 0.082966667  | -0.269966667 | -0.1378      | 0.098766667  | -0.060733333 |
| TRIM61       | 0.084966667  | -0.0986      | -0.175566667 | 0.115233333  | 0.0799       |
| SMG5         | -2.89E-19    | -0.114033333 | -0.100233333 | 0.203066667  | -0.105633333 |
| CC2D2A       | -0.1002      | -0.090233333 | -0.115133333 | 0.060066667  | -0.031466667 |
| DTNBP1       | 0.064766667  | -0.143633333 | -0.066366667 | 0.106        | 0.037466667  |
| ANKRD11      | -0.013866667 | -0.106533333 | -0.297233333 | 0.051566667  | -0.0933      |
| NUP107       | 0.065033333  | 0.0696       | -0.076933333 | 0.195933333  | 0.103733333  |
| PEX26        | -0.1958      | 0.049966667  | -0.1099      | -0.1142      | 0.141333333  |
| NSUN4        | -0.110766667 | -0.2195      | -0.158266667 | 0.0604       | -0.095433333 |

|           |              |              |              |              |              |
|-----------|--------------|--------------|--------------|--------------|--------------|
| SF3A3     | 0.122866667  | -0.012333333 | -0.0525      | 0.2212       | 0.229533333  |
| FAM24B    | 0.204633333  | -0.041233333 | -0.2338      | 0.1866       | 0.058266667  |
| SNORD56   | 0.3921       | -0.020166667 | -0.2765      | 0.313866667  | 0.101566667  |
| PRIC285   | -0.5489      | -0.269966667 | 0.272066667  | -0.360966667 | -0.061833333 |
| RRS1      | 0.306566667  | 0.098766667  | -0.226933333 | 0.399866667  | 0.162733333  |
| LOC441481 | -0.079666667 | -0.061966667 | -0.021366667 | -0.046066667 | 0.083766667  |
| LOC644162 | -0.1334      | -0.140533333 | -0.044366667 | 0.0831       | 0.032666667  |
| TCF4      | -0.272666667 | -0.179333333 | 0.1106       | -0.039866667 | 0.0162       |
| RASSF7    | 0.109166667  | -0.215633333 | -0.181266667 | 0.228633333  | -0.033066667 |
| DDX27     | -0.017833333 | -0.065966667 | -0.010366667 | 0.226366667  | 0.0611       |
| EXT2      | -0.103933333 | -0.2068      | -0.251333333 | -0.042333333 | -0.160433333 |
| TIRAP     | -0.195733333 | -0.065033333 | -0.1235      | -0.055266667 | 0.071466667  |
| CENPO     | 0.010033333  | 0.043433333  | -0.1307      | 0.246933333  | -0.011133333 |
| LOC652864 | 0.198166667  | 0.048966667  | -0.167266667 | 0.2892       | 0.074866667  |
| ZC4H2     | -0.0754      | -0.142933333 | -0.016366667 | -0.095       | 0.087666667  |
| NUP35     | 0.268566667  | 0.089566667  | -0.026566667 | 0.331333333  | 0.119366667  |
| FAM82A2   | -0.062       | 0.0497       | -0.197166667 | 0.098833333  | -0.0476      |
| PRDX1     | -0.0339      | 0.0116       | -0.0996      | 0.1145       | -0.019       |
| ZNF512B   | -0.194766667 | -0.005733333 | -0.092833333 | -0.081533333 | 0.056333333  |
| RNU1-3    | -0.045866667 | -0.138866667 | 0.108166667  | 0.3986       | -0.036833333 |
| LOC650433 | -0.132533333 | -0.031466667 | -0.104033333 | 0.063        | 0.074533333  |
| PSMD3     | 0.179233333  | -0.1783      | -0.2115      | 0.152633333  | 0.032333333  |
| PDE1C     | -0.0139      | 0.018066667  | -0.269833333 | 0.069833333  | -0.0828      |
| INO80D    | -0.0811      | -0.174566667 | 0.1103       | 0.028466667  | -0.0209      |
| SPG3A     | -0.1158      | -0.2485      | -0.2143      | 0.057933333  | -0.0945      |
| C9orf156  | 0.2306       | -0.017766667 | -0.259166667 | 0.271333333  | 0.075566667  |
| C21orf51  | -0.247466667 | -0.1722      | -0.068166667 | -0.033266667 | -0.0302      |
| TSC1      | -0.2602      | -0.187666667 | -0.1352      | -0.0862      | -0.0961      |
| HERPUD1   | -0.382533333 | -0.224       | -0.258766667 | -0.298266667 | -0.0829      |
| FAM83F    | -0.014566667 | -0.1423      | -0.1512      | -0.0072      | 0.039233333  |
| GUSB      | -0.052366667 | -0.064133333 | -0.081166667 | 0.109766667  | -0.091766667 |
| MAP3K2    | -0.015366667 | -0.122866667 | -0.1333      | 0.102733333  | -0.005066667 |
| FKBP9L    | -0.2404      | -0.3348      | -0.2799      | -0.256033333 | -0.126033333 |
| DNAJC2    | -0.066233333 | 0.2462       | -0.0896      | 0.2349       | 0.3102       |
| LOC645385 | 0.2041       | -0.1313      | -0.038233333 | 0.205133333  | 0.1629       |
| PIGX      | -0.196366667 | 0.324366667  | -0.1414      | 0.054366667  | 0.209766667  |
| MRPL19    | -0.206066667 | 0.088433333  | -0.113166667 | 0.013066667  | 0.206933333  |
| SNORD1A   | 0.067933333  | 0.059066667  | -0.1476      | 0.2762       | 0.223966667  |
| WDR44     | -0.0162      | -0.2556      | 0.0139       | 0.056633333  | 0.057633333  |
| C1orf55   | 0.185833333  | -0.071266667 | 0.077733333  | 0.320766667  | 0.040966667  |
| SYT14     | -0.0699      | -0.105       | -0.0835      | 0.172366667  | 0.046333333  |
| ICAM1     | -0.154066667 | -0.1838      | -0.034766667 | -0.057233333 | -0.053433333 |
| BID       | 0.223033333  | -0.2197      | 0.082        | 0.165466667  | 0.059033333  |
| GJC1      | -0.081633333 | 0.219133333  | -0.0585      | 0.097333333  | 0.129733333  |
| SIGMAR1   | 0.184433333  | -0.070266667 | -0.182833333 | 0.2474       | 0.054833333  |
| LOC644338 | -0.279233333 | 0.072833333  | -0.387466667 | -0.178266667 | 0.126333333  |
| UHRF1BP1L | 0.138166667  | 0.0717       | -0.220433333 | 0.2201       | -0.059766667 |

|              |              |              |              |              |              |
|--------------|--------------|--------------|--------------|--------------|--------------|
| SNORA41      | 0.1669       | -0.068866667 | -0.046166667 | 0.264533333  | 0.092833333  |
| TRPT1        | -0.507833333 | -0.286266667 | 0.084933333  | -0.301566667 | -0.0706      |
| SMAD5        | 0.075366667  | -0.1289      | -0.001233333 | 0.137033333  | 0.221466667  |
| C7orf49      | -0.0154      | -0.065366667 | -0.148733333 | 0.152        | -0.013066667 |
| ATIC         | -0.073033333 | -0.0903      | -0.000733333 | 0.070033333  | 0.0122       |
| CEP290       | -0.219933333 | -0.149466667 | -0.001533333 | -0.063633333 | -0.017566667 |
| LOC100131166 | 0.1686       | -0.0827      | -0.0739      | 0.185166667  | 0.031766667  |
| LYRM4        | -0.075133333 | -0.027766667 | -0.050133333 | 0.179033333  | 0.008366667  |
| MGC3731      | 0.255866667  | 0.157666667  | -0.179633333 | 0.3008       | 0.263766667  |
| ZC3HC1       | -0.122366667 | 0.000833333  | 0.019433333  | 0.119266667  | 0.0556       |
| C7orf30      | 0.091433333  | -0.091666667 | -0.110233333 | 0.200233333  | 0.0948       |
| CTPS         | 0.210366667  | 0.0283       | -0.326766667 | 0.1901       | 0.026066667  |
| RPF1         | -0.011666667 | 0.097933333  | -0.159466667 | 0.236566667  | 0.0537       |
| LOC642082    | -0.0494      | -0.2327      | 0.031766667  | 0.1042       | -0.087566667 |
| ENPP4        | -0.207666667 | -0.126833333 | -0.034666667 | -0.044166667 | 0.0911       |
| PSMB3        | 0.012633333  | -0.0994      | 0.0164       | 0.126633333  | 0.1943       |
| LRRC8A       | -0.072733333 | -0.144266667 | -0.076466667 | 0.011        | -0.029666667 |
| WTIP         | 0.187033333  | -0.092433333 | -0.1106      | 0.078333333  | 0.036066667  |
| STOX1        | 0.070366667  | -0.0011      | -0.1223      | 0.234366667  | 0.076133333  |
| C1QTNF1      | -0.4148      | -0.118566667 | 0.204233333  | -0.234033333 | 0.010033333  |
| ASF1B        | 0.299666667  | -0.0759      | -0.1102      | 0.117166667  | 0.129766667  |
| CNOT6        | 0.047766667  | -0.0713      | -0.022333333 | 0.0379       | 0.076233333  |
| IER3         | 0.133366667  | 0.078366667  | 0.503733333  | 0.397933333  | 0.1928       |
| NSUN2        | 0.194366667  | 0.005833333  | -0.194133333 | 0.2411       | 0.085233333  |
| RFXANK       | -0.4044      | -0.0217      | -0.073333333 | -0.261333333 | 0.025433333  |
| CLCN3        | -0.386266667 | -0.1935      | 0.0972       | -0.262033333 | 0.026166667  |
| C12orf49     | 0.055433333  | -0.124266667 | -0.1468      | 0.109566667  | -0.010866667 |
| ZNF12        | -0.079266667 | -0.166233333 | -0.107333333 | 0.009966667  | 0.011066667  |
| RNF19B       | 0.110866667  | -0.129266667 | -0.184066667 | 0.129833333  | -0.014633333 |
| ZSWIM3       | -0.173366667 | -0.1843      | -0.0358      | -0.077733333 | 0.108166667  |
| TIMM23       | 0.185166667  | 0.050766667  | -0.0448      | 0.311466667  | 0.098533333  |
| FANCB        | 0.2954       | 0.157866667  | -0.1122      | 0.475        | 0.181066667  |
| KRIT1        | -0.192733333 | -0.0995      | -0.045666667 | -0.052433333 | 0.0767       |
| AP1B1        | -0.0153      | -0.042433333 | -0.031233333 | 0.1203       | 0.082533333  |
| CXorf15      | 0.1413       | -0.030366667 | -0.0783      | 0.192433333  | -0.031933333 |
| CYorf15A     | 0.0397       | -0.058533333 | -0.046533333 | 0.102333333  | 0.143166667  |
| RSRC2        | 0.0383       | 0.0667       | -0.034333333 | 0.227666667  | 0.134733333  |
| CIB1         | -0.150233333 | -0.1346      | 0.039133333  | -0.0184      | 0.119933333  |
| DDX52        | -0.086866667 | 0.196733333  | -0.076433333 | 0.098        | 0.175466667  |
| NOLA1        | 0.198033333  | 0.1381       | -0.183833333 | 0.2678       | 0.181166667  |
| TRIM27       | 0.109366667  | -0.084033333 | -0.055366667 | 0.250733333  | 0.083766667  |
| DIS3L        | -0.116233333 | -0.103       | -0.003133333 | 0.112233333  | 0.081933333  |
| COPS8        | -0.130933333 | 0.016533333  | -0.102033333 | -0.009766667 | 0.101566667  |
| MAPK12       | -0.2197      | -0.0915      | 0.137666667  | 0.054266667  | 0.034266667  |
| LOC653994    | 0.374833333  | -0.044333333 | -0.130733333 | 0.381966667  | 0.200366667  |
| ZNF43        | -0.187366667 | 0.1221       | -0.2008      | -0.0028      | 0.1226       |
| CAPRN2       | -0.090833333 | 0.0033       | -0.044066667 | 0.036166667  | -0.0314      |

|              |              |              |              |              |              |
|--------------|--------------|--------------|--------------|--------------|--------------|
| DDX28        | 0.1233       | 0.0466       | -0.150033333 | 0.191        | -0.004466667 |
| LSM12        | 0.045133333  | -0.028433333 | -0.001666667 | 0.258033333  | 0.0847       |
| CCDC137      | 0.2366       | 0.084866667  | 0.060833333  | 0.382433333  | 0.222466667  |
| CCDC94       | -0.031566667 | 0.005066667  | -0.1612      | 0.093466667  | 0.0413       |
| LOC96610     | 0.168066667  | -0.023466667 | -0.100533333 | 0.172266667  | 0.113266667  |
| RP9          | 0.165233333  | 0.052333333  | -0.192033333 | 0.238433333  | 0.074266667  |
| SIPA1L1      | -0.029766667 | -0.124833333 | 0.1383       | 0.236        | -0.007566667 |
| MORC3        | -0.0726      | 0.000433333  | -0.0284      | 0.143733333  | 0.100866667  |
| LOC401805    | 0.1136       | -0.226933333 | 0.074433333  | 0.159366667  | 0.015866667  |
| NUP88        | -0.006666667 | 0.0413       | -0.178366667 | 0.1261       | 0.018366667  |
| LDHA         | 0.083533333  | -0.1107      | 0.003433333  | 0.0846       | 0.072833333  |
| PPP3R1       | 0.213833333  | 0.0079       | -0.105933333 | 0.2888       | 0.134366667  |
| LOC100128975 | -0.244733333 | -0.048633333 | -0.0172      | -0.091266667 | 0.062366667  |
| KIAA1285     | -0.150133333 | -0.077466667 | -0.047066667 | 0.092966667  | 0.0312       |
| ZBTB3        | -0.256133333 | -0.1725      | -0.209333333 | -0.260633333 | 0.018566667  |
| HEMK1        | -0.0665      | -0.221       | -0.166433333 | -0.094433333 | 0.034666667  |
| TMEM194A     | 0.305733333  | -0.0183      | -0.071       | 0.306733333  | 0.054266667  |
| ENOPH1       | 0.236533333  | -0.020766667 | -0.2248      | 0.297533333  | 0.0326       |
| CHKA         | 0.064166667  | 0.068666667  | -0.238933333 | 0.1931       | 0.059166667  |
| RPS6KB1      | -0.02        | -0.247266667 | -0.0595      | 0.0277       | 0.022866667  |
| PLSCR4       | -0.033666667 | -0.3523      | -0.168133333 | -0.1034      | 9.25E-18     |
| C8orf41      | -0.069366667 | 0.0452       | -0.0655      | -0.0224      | 0.228966667  |
| HEATR3       | -0.0463      | 0.11         | -0.130733333 | 0.024833333  | 0.010433333  |
| ZUFSP        | 0.0113       | -0.0537      | -0.063433333 | 0.125333333  | 0.065833333  |
| PIK3R2       | -0.2924      | -0.173766667 | 0.049833333  | -0.142666667 | 0.003166667  |
| LOC343184    | 0.018333333  | -0.0565      | -0.120433333 | 0.1029       | 0.126566667  |
| PWP1         | 0.0766       | 0.009933333  | -0.186333333 | 0.151        | 0.025333333  |
| RBPJ         | -0.003533333 | 0.004        | 0.352133333  | 0.4013       | 0.097966667  |
| EDG4         | -0.321366667 | -0.301466667 | 0.061333333  | -0.2118      | -0.151166667 |
| MPV17L2      | 0.094533333  | -0.188333333 | -0.0039      | 0.110366667  | 0.060766667  |
| UBE2V1       | 0.137433333  | 0.0022       | 0.013566667  | 0.253166667  | 0.195766667  |
| KLHL36       | -0.206933333 | -0.170066667 | 0.022066667  | 0.044966667  | 0.002366667  |
| 14-Sep       | -0.049333333 | -0.069633333 | -0.072633333 | 0.164366667  | -0.041933333 |
| ANG          | -0.0441      | -0.2746      | 0.239166667  | 0.041166667  | 0.0316       |
| SLC35A3      | -0.133866667 | -0.040433333 | -0.029533333 | 0.069733333  | 0.0428       |
| MED6         | 0.063033333  | 0.042766667  | -0.074933333 | 0.1729       | 0.101866667  |
| IKZF5        | 0.040366667  | -0.156833333 | -0.056366667 | 0.202466667  | 0.054366667  |
| TPMT         | -0.189533333 | -0.089366667 | -0.046666667 | -0.1227      | 0.154733333  |
| SMNDC1       | -0.018733333 | -0.206133333 | 0.102866667  | 0.086466667  | 0.226733333  |
| TRUB1        | 0.1732       | 0.024333333  | -0.2321      | 0.185933333  | 0.085233333  |
| GRPEL2       | 0.0132       | -0.169233333 | -0.126266667 | 0.051433333  | 0.034633333  |
| NDUFS8       | -0.321833333 | -0.181233333 | 0.134266667  | 0.044133333  | 0.0743       |
| MBOAT1       | 0.061833333  | -0.144433333 | 0.061        | 0.160566667  | 0.094066667  |
| FSTL3        | 0.0596       | -0.275933333 | -0.244066667 | 0.202866667  | -0.2499      |
| TLCD1        | -0.251033333 | -0.147666667 | -0.043466667 | -0.069233333 | 0.107966667  |
| USP3         | 0.045933333  | 0.0281       | -0.0326      | 0.166133333  | 0.060866667  |
| IFNGR2       | -0.1098      | -0.050333333 | 0.184366667  | 0.060466667  | 0.045133333  |

|              |              |              |              |              |              |
|--------------|--------------|--------------|--------------|--------------|--------------|
| LPIN1        | -0.215866667 | -0.1477      | 0.022066667  | 0.087066667  | -0.0966      |
| UBE2D3       | 0.237833333  | -0.167333333 | -0.061966667 | 0.2322       | 0.0907       |
| BCL10        | 0.013066667  | -0.039333333 | 0.075833333  | 0.157        | 0.0504       |
| LOC644745    | 0.0524       | 0.0969       | -0.346733333 | 0.0914       | 0.158866667  |
| LOC441191    | 0.2532       | 0.0367       | -0.124       | 0.429533333  | 0.0776       |
| HAUS8        | 0.085433333  | 0.188966667  | -0.2727      | 0.1994       | 0.028866667  |
| GLOD4        | 0.086166667  | 0.0282       | -0.141033333 | 0.105866667  | 0.015033333  |
| RPL12P6      | -0.413666667 | -0.112466667 | 0.112133333  | -0.031       | -0.057833333 |
| PSMB7        | 0.069733333  | -0.066366667 | -0.051466667 | 0.0223       | 0.2423       |
| SIAH2        | 0.0457       | -0.129733333 | -0.211633333 | 0.1624       | -0.0518      |
| LOC728635    | -0.204633333 | -0.2592      | -0.109966667 | -0.103233333 | 0.054066667  |
| HAX1         | -0.491233333 | -0.0388      | -0.371       | -0.252433333 | -0.000333333 |
| PTPN1        | 0.123033333  | -0.053033333 | -0.073266667 | 0.270466667  | -0.011866667 |
| KPNA2        | 0.222133333  | 0.189933333  | -0.153766667 | 0.3549       | 0.0634       |
| LOC647307    | -0.3352      | 0.027266667  | -0.328966667 | -0.301366667 | 0.1405       |
| ZKSCAN3      | -0.087       | -0.0588      | -0.155766667 | 0.019633333  | -0.038066667 |
| PPM1A        | 0.222133333  | -0.212566667 | -0.053266667 | 0.2235       | 0.022666667  |
| VPS29        | -0.1239      | -0.0229      | -0.0645      | 0.0261       | 0.157966667  |
| LOC100132086 | -0.0886      | 0.189633333  | -0.315633333 | 0.117066667  | 0.088633333  |
| PCGF5        | -0.1146      | 0.021566667  | -0.084633333 | 0.009533333  | 0.0387       |
| DHX32        | -0.217266667 | -0.299733333 | -0.021166667 | -0.1873      | -0.0634      |
| RGS17        | -0.014833333 | -0.047966667 | 0.172066667  | -0.051       | 0.206        |
| TMBIM6       | -0.0413      | -0.135933333 | -0.126566667 | 0.011766667  | 0.0387       |
| CCR6         | 0.041666667  | 0.051666667  | -0.0871      | 0.085433333  | 0.0957       |
| SULT1A2      | -0.081266667 | -0.3197      | -0.040966667 | -0.188       | -0.000633333 |
| LOC728973    | -0.082933333 | -0.0828      | -0.183666667 | 0.128066667  | -0.059933333 |
| HUS1B        | 0.203733333  | -0.0434      | -0.081233333 | 0.329833333  | -0.057933333 |
| PSMB5        | -0.058233333 | -0.031566667 | 0.002166667  | 0.1369       | 0.112733333  |
| NUDT21       | 0.230133333  | 0.1521       | -0.100566667 | 0.2871       | 0.277466667  |
| SCYE1        | 0.007133333  | 0.0186       | -0.027066667 | 0.087433333  | 0.092933333  |
| LOC651397    | -0.001533333 | -0.0484      | -0.2891      | -0.021633333 | 0.066933333  |
| CCS          | -0.1696      | -0.003366667 | -0.048133333 | 0.011466667  | 0.056866667  |
| ZNF605       | -0.077466667 | -0.294066667 | -0.0536      | -0.0708      | -0.008566667 |
| DNAL1        | -0.104933333 | -0.035033333 | -0.183133333 | -0.0313      | 0.016133333  |
| LOC152217    | 0.088333333  | -0.0893      | -0.105233333 | 0.188166667  | 0.147        |
| IDH3G        | -0.266666667 | -0.100666667 | -0.0732      | -0.110266667 | 0.028233333  |
| MGC27345     | 0.309233333  | -0.020533333 | -0.123766667 | 0.3353       | 0.100466667  |
| LOC730996    | 0.0742       | -0.1717      | 0.136533333  | 0.1554       | 0.186233333  |
| CEP135       | 0.232666667  | 0.079        | -0.0168      | 0.252366667  | 0.216        |
| COPS6        | 0.0865       | -0.007466667 | -0.043233333 | 0.184        | 0.153533333  |
| COPS7B       | 0.133933333  | -0.035566667 | -0.124133333 | 0.198433333  | 0.087366667  |
| DYNC1L1      | -0.0765      | 0.1481       | -0.063833333 | 0.119966667  | 0.214666667  |
| SNIP1        | 0.077366667  | 0.006633333  | -0.191566667 | 0.1473       | 0.1101       |
| LOC652903    | 0.153433333  | 0.006166667  | -0.1018      | 0.222366667  | 0.133666667  |
| MAGEA9B      | -0.0451      | 0.088166667  | -0.1961      | 0.091066667  | 0.019866667  |
| VAPA         | 0.203866667  | 0.0227       | -0.211133333 | 0.367133333  | 0.005333333  |
| TMEM87A      | -0.035833333 | -0.0412      | -0.0409      | 0.214666667  | 0.030566667  |

|           |              |              |              |              |              |
|-----------|--------------|--------------|--------------|--------------|--------------|
| EIF1AD    | 0.050133333  | 0.017866667  | -0.1025      | 0.073366667  | 0.1859       |
| GSR       | -0.011233333 | -0.038333333 | -0.228033333 | 0.058733333  | 0.0372       |
| PPP3CC    | 0.146133333  | -0.0687      | -0.1164      | 0.252333333  | 0.023366667  |
| ANKMY2    | -0.350866667 | -0.054866667 | -0.049066667 | -0.062133333 | -0.0453      |
| OSTF1     | -0.089933333 | -0.088633333 | -0.0897      | -0.1339      | 0.0995       |
| CHAC2     | 0.1091       | 0.0869       | -0.095033333 | 0.178866667  | 0.136533333  |
| UCHL5IP   | 0.228933333  | 0.017066667  | -0.189533333 | 0.177066667  | 0.136333333  |
| SFXN5     | 0.0412       | -0.1193      | -0.193966667 | 0.1776       | -0.037033333 |
| CCDC21    | 0.025833333  | 0.022466667  | -0.192733333 | 0.179233333  | -0.059133333 |
| FAM36A    | -0.109033333 | -0.003833333 | -0.135166667 | 0.110833333  | 0.0296       |
| THBS1     | 0.6733       | -0.098433333 | -0.832833333 | 0.6213       | 0.016033333  |
| LDLRAD3   | 0.013766667  | -0.115466667 | -0.0056      | 0.1254       | -0.000833333 |
| COG1      | -0.231733333 | -0.1668      | -0.175066667 | -0.109866667 | -0.017033333 |
| FCHO2     | -0.149233333 | -0.313233333 | 0.157066667  | 0.0023       | 0.018166667  |
| CDC42     | -0.150166667 | 0.0687       | 0.014433333  | 0.0942       | 0.103166667  |
| RHEBL1    | 0.1197       | -0.1088      | -0.050866667 | 0.284866667  | -0.023233333 |
| TUBB6     | 0.2024       | -0.043666667 | -0.163066667 | 0.2037       | 0.009666667  |
| FAM135A   | -0.011333333 | -0.170433333 | -0.042733333 | -0.065333333 | 0.1405       |
| MED16     | -0.058566667 | -0.082966667 | 0.0332       | -0.018033333 | 0.090066667  |
| WIPI1     | -0.2904      | -0.221866667 | 0.0225       | -0.065       | -0.080266667 |
| PDHA1     | -0.2327      | 0.109833333  | -0.2237      | 0.004966667  | 0.067666667  |
| DMXL2     | -0.080566667 | -0.092533333 | -0.043833333 | 0.1246       | -0.1231      |
| MFF       | -0.2122      | -0.027366667 | -0.307133333 | -0.103       | 0.088633333  |
| PSMD9     | 0.1213       | 0.004566667  | -0.323466667 | 0.150633333  | -0.078366667 |
| PRPF3     | 0.170666667  | -0.0337      | -0.000233333 | 0.2832       | 0.114333333  |
| RBM4      | 0.241466667  | -0.069533333 | -0.067766667 | 0.281733333  | 0.077833333  |
| KCNMB3    | -0.092866667 | 0.025233333  | -0.1812      | 0.0158       | -0.0483      |
| UBFD1     | -0.1547      | -0.074766667 | 0.078233333  | 0.0555       | 0.069566667  |
| FKBP1A    | 0.2486       | -0.222833333 | 0.031733333  | 0.269766667  | -0.0412      |
| ZNF195    | 0.089633333  | -0.107266667 | -0.1962      | 0.1003       | -0.0599      |
| LOC642812 | 0.017066667  | 0.061433333  | -0.053466667 | 0.1582       | 0.0745       |
| LOC654174 | 0.356366667  | -0.038666667 | -0.1884      | 0.230533333  | 0.0716       |
| GARS      | -0.225933333 | -0.2535      | -0.0986      | -0.2158      | -0.0252      |
| ZNF695    | 0.124033333  | 0.016033333  | -0.170633333 | 0.1774       | 0.0386       |
| CYCSP52   | 0.146        | 0.0027       | -0.1708      | 0.1831       | 0.012233333  |
| SPCS2     | -0.062733333 | -0.024266667 | -0.148333333 | 0.091566667  | -0.153066667 |
| LOC151457 | -0.024333333 | 0.078066667  | -0.1205      | 0.068233333  | 0.1728       |
| SNORD21   | 0.081066667  | -0.009233333 | -0.207133333 | 0.1024       | 0.104266667  |
| RAB17     | -0.3643      | -0.0984      | 0.099066667  | -0.209733333 | 0.1547       |
| MLF1      | -0.234566667 | 0.0576       | -0.084233333 | 0.015866667  | 0.077866667  |
| CYFIP2    | -0.239966667 | -0.088666667 | -0.034766667 | -0.2019      | 0.124433333  |
| CCDC84    | 0.0281       | 0.0238       | -0.286266667 | 0.0989       | 0.075733333  |
| MCL1      | 0.036533333  | -0.012133333 | 0.1532       | 0.100266667  | -0.0296      |
| PM20D2    | 0.076        | -0.006333333 | -0.069133333 | 0.190833333  | 0.110566667  |
| SUZ12P    | -0.361466667 | -0.078266667 | 0.159366667  | -0.0307      | 0.128933333  |
| KIAA0247  | 0.086133333  | -0.242466667 | -0.020166667 | 0.172366667  | -0.0745      |
| ESF1      | -0.120166667 | 0.127566667  | -0.086033333 | 0.106466667  | 0.166833333  |

|           |              |              |              |              |              |
|-----------|--------------|--------------|--------------|--------------|--------------|
| PAPD5     | 0.081233333  | 0.0772       | 0.0712       | 0.2732       | 0.1994       |
| LOC649214 | -0.340866667 | 0.288        | -0.429533333 | -0.2269      | 0.395        |
| LOC728344 | -0.0564      | 0.080133333  | -0.1735      | -0.006166667 | 0.135633333  |
| NKIRAS1   | -0.119133333 | 0.052933333  | 0.0777       | 0.068633333  | 0.1639       |
| ZAK       | -0.069266667 | -0.083233333 | 0.0125       | 0.115066667  | -0.0318      |
| RPIA      | -0.002033333 | 0.067933333  | -0.2044      | 0.1072       | 0.069566667  |
| C12orf47  | -0.244466667 | -0.107066667 | -0.127966667 | -0.1049      | 0.031533333  |
| PJA1      | 0.0054       | -0.0406      | -0.0971      | 0.108766667  | -0.047166667 |
| LOC643300 | 0.151633333  | 0.0594       | -0.087833333 | 0.248666667  | 0.123966667  |
| ARL1      | -0.210066667 | -0.1778      | 0.0825       | 0.027466667  | -0.000166667 |
| OXSR1     | 0.316466667  | -0.230133333 | -0.182033333 | 0.3024       | -0.045733333 |
| RABL3     | -0.005633333 | 0.024366667  | 0.015        | -0.043766667 | 0.2784       |
| SNORA80   | 0.0883       | -0.0941      | -0.142033333 | 0.135166667  | 0.120633333  |
| ZNF213    | 0.0551       | -0.074366667 | -0.170966667 | -0.032066667 | 0.123333333  |
| C16orf70  | 0.067666667  | -0.060933333 | -0.1251      | 0.138333333  | 0.057333333  |
| POLRMT    | -0.044466667 | 0.0008       | -0.017033333 | 0.059933333  | 0.165266667  |
| KIAA0562  | -0.051933333 | -0.172966667 | 0.040566667  | -0.019433333 | 0.0861       |
| RIMS2     | 0.118333333  | 0.0062       | -0.004033333 | 0.3457       | 0.010066667  |
| FVT1      | 0.2192       | 0.012233333  | -0.070966667 | 0.1409       | 0.216733333  |
| TARDBP    | 0.079566667  | 0.0784       | -0.2719      | 0.244733333  | -0.0413      |
| LOC387867 | -0.120233333 | -0.0752      | 0.000333333  | 0.0398       | 0.1271       |
| BANP      | 0.003966667  | -0.122833333 | 0.049466667  | 0.038233333  | 0.2571       |
| EIF4A1    | 0.205366667  | 0.152633333  | -0.018566667 | 0.382033333  | 0.0176       |
| GALE      | -0.3508      | -0.1287      | 0.112933333  | -0.097933333 | -0.021933333 |
| SLC25A20  | -0.3451      | -0.072266667 | -0.1539      | -0.045966667 | -0.033533333 |
| LOC644684 | 0.039233333  | -0.116566667 | 0.003633333  | 0.064966667  | 0.175533333  |
| PPP2CA    | 0.031166667  | -0.020933333 | -0.039766667 | 0.0558       | -0.009533333 |
| C17orf106 | -0.023633333 | -0.092433333 | -0.128766667 | 0.146933333  | 0.124666667  |
| CSTB      | -0.115966667 | -0.283       | 0.037266667  | -0.0721      | -0.0673      |
| YTHDF2    | -0.0029      | 0.023033333  | 0.094633333  | 0.279166667  | 0.061933333  |
| TAPBPL    | -0.105133333 | -0.183166667 | -0.1823      | -0.098366667 | 0.067066667  |
| PCMTD1    | -0.341266667 | -0.185833333 | -0.071766667 | -0.2352      | -0.034333333 |
| MRPL23    | 0.0292       | -0.164366667 | -0.068       | 0.069166667  | 0.033833333  |
| TMEM150A  | -0.459333333 | -0.063466667 | 0.0282       | -0.175533333 | 0.0586       |
| CLCN7     | -0.2427      | -0.150133333 | -0.1335      | -0.1826      | 0.0166       |
| LOC729774 | 0.1502       | -0.013133333 | 0.004466667  | 0.1534       | 0.156833333  |
| MED10     | 0.0836       | 0.017333333  | -0.172066667 | 0.149766667  | 0.063266667  |
| NCKIPSD   | -0.2301      | -0.165566667 | 0.0494       | -0.1778      | 0.073066667  |
| IRF1      | 0.112133333  | -0.052466667 | -0.1894      | 0.304933333  | 0.058366667  |
| LTV1      | 0.167633333  | 0.041        | -0.072233333 | 0.235266667  | 0.112933333  |
| SLC3A2    | 0.387566667  | -0.472533333 | -0.925933333 | -0.059366667 | -0.180533333 |
| MIR635    | -0.190333333 | -0.2185      | -0.273266667 | -0.1803      | 0.0807       |
| PSPH      | -0.405333333 | -0.023433333 | -0.3485      | -0.402033333 | -0.046033333 |
| MYBL1     | 0.302766667  | 0.067966667  | -0.082933333 | 0.3953       | 0.1568       |
| HSPE1     | 0.088266667  | 0.018966667  | -0.023966667 | 0.348866667  | -0.0683      |
| PCBP1     | -0.025033333 | 0.0113       | 0.083        | 0.1129       | 0.131        |
| IQSEC2    | -0.089766667 | -0.1103      | -0.098066667 | -0.003333333 | 0.024166667  |



|              |              |              |              |              |              |
|--------------|--------------|--------------|--------------|--------------|--------------|
| POLR2A       | 0.164366667  | 0.0097       | -0.0645      | 0.138366667  | 0.142733333  |
| APEX2        | 0.194566667  | -0.094766667 | -0.007       | 0.199733333  | 0.0268       |
| LOC100129866 | 0.094        | 0.066933333  | -0.270766667 | 0.1474       | 0.034        |
| CCDC90A      | 0.030266667  | 0.0789       | -0.224833333 | 0.062533333  | 0.0798       |
| LOC653175    | -0.036466667 | -0.030066667 | 0.065766667  | 0.176        | 0.057        |
| RPS27L       | -0.036966667 | -0.072133333 | -0.151033333 | -0.036       | 0.145666667  |
| C9orf6       | -0.054366667 | -0.089233333 | -0.266966667 | 0.0318       | -0.097366667 |
| LOC100132323 | -0.154633333 | 0.3018       | 0.005933333  | -0.086733333 | 0.262966667  |
| VPS26B       | -0.076333333 | 0.020133333  | 0.0634       | 0.099233333  | 0.038233333  |
| CRELD1       | -0.604566667 | -0.263866667 | 0.249233333  | -0.402266667 | 0.012033333  |
| FARS2        | -0.147033333 | 0.0123       | 0.012166667  | -0.0881      | 0.175033333  |
| HSPD1        | 0.222733333  | 0.068766667  | 0.093433333  | 0.3716       | 0.169366667  |
| THEX1        | -0.020266667 | -0.0433      | -0.000366667 | 0.0795       | 0.184766667  |
| ZFPL1        | -0.275966667 | -0.0911      | -0.072966667 | -0.100066667 | -0.068266667 |
| TATDN1       | -0.1154      | 0.0239       | -0.258466667 | -0.004033333 | 0.127866667  |
| IFT122       | -0.069       | -0.1117      | -0.067833333 | 0.041633333  | 0.065166667  |
| LOC678655    | -0.2751      | -0.086533333 | -0.0389      | -0.1797      | -0.004533333 |
| FAM76A       | -0.163133333 | -0.006233333 | -0.195433333 | -0.068166667 | 0.008266667  |
| LOC729298    | -0.0123      | 0.065233333  | 0.113366667  | 0.110566667  | 0.171066667  |
| EAF1         | -0.065566667 | 0.003233333  | -0.298066667 | 0.096133333  | 0.061633333  |
| LOC731878    | 0.108666667  | -0.035766667 | -0.0747      | 0.200366667  | 0.007466667  |
| ACP1         | 0.131233333  | 0.0267       | -0.1692      | 0.372933333  | -0.058133333 |
| NDUFV2       | -0.0291      | -0.129066667 | 0.031666667  | 0.097733333  | -0.0043      |
| RNF169       | -0.0928      | -0.105933333 | -0.119433333 | -0.183766667 | 0.064866667  |
| DYRK1A       | 0.1374       | 0.052066667  | -0.057233333 | 0.276733333  | 0.190066667  |
| LOC400890    | 0.205633333  | -0.1039      | 0.044866667  | 0.243833333  | 0.0044       |
| SMARCA2      | -0.331833333 | -0.091266667 | -0.1807      | -0.1324      | 0.0173       |
| RFC2         | 0.346066667  | 0.0013       | -0.1664      | 0.261066667  | 0.0316       |
| FADD         | 0.1185       | -0.076933333 | -0.1002      | 0.126033333  | 0.014233333  |
| C10orf11     | -0.251466667 | -0.184266667 | 0.036433333  | -0.181733333 | -0.053       |
| CPEB3        | -0.1513      | -0.004066667 | -0.102466667 | -0.026033333 | 0.034533333  |
| TOP1MT       | 0.1808       | -0.210766667 | 0.020766667  | 0.097833333  | 0.116666667  |
| CCT7         | 0.191866667  | -0.100533333 | -0.0662      | 0.243666667  | 0.090866667  |
| ANKRD40      | 0.114233333  | -0.1043      | -0.1263      | 0.276666667  | -0.0728      |
| BCL9L        | 0.005066667  | -0.014733333 | 0.114933333  | 0.122766667  | 0.079366667  |
| NT5C3L       | -0.159466667 | -0.031833333 | 0.010933333  | 0.1176       | 0.004866667  |
| IGF2R        | -0.2201      | -0.176033333 | -0.0687      | -0.176933333 | -0.150733333 |
| LOC645100    | 0.052333333  | -0.070333333 | -0.0792      | 0.071233333  | 0.066266667  |
| BTBD11       | 0.015766667  | 0.271733333  | 0.206        | 0.121833333  | 0.2711       |
| LHFPL2       | -0.362533333 | -0.229866667 | 0.033433333  | -0.1772      | -0.134566667 |
| SYNJ2BP      | -0.457666667 | -0.017033333 | -0.020233333 | -0.1495      | 0.058733333  |
| UBTD1        | 0.195733333  | -0.142566667 | -0.012533333 | 0.1          | 0.1099       |
| LOC387934    | 0.0723       | 0.310366667  | -0.366633333 | 0.116833333  | 0.2545       |
| TUBB2C       | 0.3844       | 0.0527       | 0.102066667  | 0.476566667  | 0.179466667  |
| CDK5RAP1     | 0.029766667  | -0.028366667 | -0.200666667 | 0.1052       | -0.003766667 |
| LOC441034    | 0.0569       | -0.0364      | -0.1192      | 0.033166667  | 0.120266667  |
| PPP1R16A     | -0.064833333 | 0.0205       | -0.0355      | -0.056533333 | 0.127433333  |

|              |              |              |              |              |              |
|--------------|--------------|--------------|--------------|--------------|--------------|
| MMD          | 0.049433333  | -0.0911      | 0.005833333  | 0.068966667  | 0.081166667  |
| LOC641798    | -0.013266667 | 0.026166667  | -0.1492      | 0.145466667  | -0.028533333 |
| LOC388524    | 0.053166667  | -0.140933333 | -0.153533333 | 0.016433333  | 0.013066667  |
| PLCH2        | -0.122433333 | -0.100933333 | 0.191333333  | 0.119266667  | -0.0211      |
| GFOD2        | 0.2633       | 0.024633333  | -0.101966667 | 0.292066667  | 0.095866667  |
| FAM58A       | 0.166533333  | -0.024566667 | -0.1186      | 0.1702       | 0.0404       |
| TMED10       | 0.044433333  | -0.233566667 | -0.1745      | -0.0181      | -0.138066667 |
| ANKRD13A     | -0.032066667 | -0.0514      | -0.281833333 | 0.080833333  | -0.050166667 |
| SLC19A1      | 0.239966667  | 0.037366667  | -0.031966667 | 0.313266667  | 0.079366667  |
| MBD6         | -0.258066667 | -0.1104      | -0.116566667 | -0.2203      | 0.010933333  |
| LOC442153    | 0.030766667  | 0.1655       | -0.2732      | 0.1054       | 0.1903       |
| DDX24        | 0.3719       | -0.136633333 | 0.068133333  | 0.260466667  | 0.157166667  |
| ARHGAP28     | -0.103233333 | -0.163133333 | 0.0021       | 0.008333333  | 0.1153       |
| WDSUB1       | -0.245266667 | -0.0932      | -0.198366667 | -0.0965      | -0.002266667 |
| KBTBD2       | 0.117566667  | 0.026966667  | 0.0034       | 0.196733333  | 0.0174       |
| NISCH        | -0.169566667 | -0.1105      | -0.098366667 | -0.1049      | -0.060133333 |
| CCL20        | -0.3105      | -0.119366667 | 0.411433333  | 0.029433333  | 0.009866667  |
| PIAS4        | 0.029266667  | -0.089066667 | 0.0269       | 0.078766667  | 0.1452       |
| RBM17        | -0.032666667 | 0.019566667  | -0.107066667 | 0.138233333  | 0.024033333  |
| PACSIN2      | 0.0389       | 0.018166667  | -0.051833333 | 0.0177       | 0.108566667  |
| ZDHHC5       | -0.008333333 | -0.012833333 | 0.057766667  | 0.179666667  | 0.0576       |
| PGAM4        | -0.378666667 | 0.285366667  | -0.369966667 | -0.188733333 | 0.2644       |
| SLC43A1      | -0.279066667 | -0.0441      | 0.033        | -0.098133333 | -0.125266667 |
| PRRC1        | -0.145966667 | 0.005966667  | -0.001566667 | 0.025466667  | 0.1957       |
| DOCK6        | -0.295466667 | -0.0312      | 0.022166667  | -0.187666667 | 0.102833333  |
| RSRC1        | -0.030433333 | -0.057766667 | -0.046966667 | 0.058733333  | 0.0213       |
| MGC45800     | -0.080633333 | -0.149066667 | -0.154766667 | 0.1997       | -0.056333333 |
| CTBS         | -0.354166667 | -0.162266667 | 0.190466667  | -0.220466667 | 0.003066667  |
| KLHDC5       | 0.0961       | -0.2162      | -0.027266667 | -0.030533333 | 0.047733333  |
| LOC729692    | 0.1927       | 0.113533333  | -0.021233333 | 0.51         | 0.045533333  |
| TMEM33       | 0.146466667  | 0.014633333  | -0.0133      | 0.204466667  | 0.1339       |
| RPAP2        | -0.098533333 | -0.207666667 | -0.066966667 | 0.032066667  | -0.0219      |
| OSTM1        | -0.042633333 | -0.192066667 | -0.039366667 | 6.67E-05     | -0.0452      |
| RASA4P       | -0.025       | -0.042333333 | -0.096833333 | 0.067166667  | 0.046866667  |
| NUDT18       | -0.4585      | -0.190833333 | -0.124633333 | -0.277633333 | -0.0852      |
| LOC646197    | 0.180333333  | 0.101233333  | -0.045933333 | 0.2466       | 0.1192       |
| PIR          | -0.349       | -0.1558      | 0.031133333  | -0.352033333 | 0.177366667  |
| ZBTB24       | -0.066666667 | 0.027333333  | -0.216433333 | 0.035366667  | 0.012766667  |
| EIF4ENIF1    | 0.099766667  | -0.020333333 | -0.106       | 0.208233333  | -0.024533333 |
| TBPL1        | 0.008366667  | 0.105966667  | -0.038266667 | 0.221833333  | 0.123766667  |
| SCML2        | 0.194233333  | -0.041666667 | 0.0286       | 0.326666667  | 0.032333333  |
| SOD1         | -0.113066667 | -0.010133333 | -0.107133333 | 0.0081       | 0.129766667  |
| GSDMD        | -0.3222      | -0.0999      | 0.123166667  | -0.100933333 | -0.060433333 |
| LOC100131381 | -0.024233333 | -0.020966667 | 0.005966667  | 0.0606       | -0.0336      |
| LOC653472    | -0.038366667 | -0.085566667 | 0.0957       | 0.253733333  | -0.121133333 |
| LOC728556    | 0.1604       | -0.108033333 | 0.129233333  | 0.110733333  | 0.2267       |
| DDA1         | 0.0796       | 0.038133333  | -0.044866667 | 0.1092       | 0.210666667  |

|              |              |              |              |              |              |
|--------------|--------------|--------------|--------------|--------------|--------------|
| CDCA4        | 0.478733333  | 0.019266667  | -0.047633333 | 0.324033333  | 0.1658       |
| DYNLT1       | -0.018       | -0.1041      | -0.0283      | -0.080366667 | 0.010566667  |
| ZFAND3       | -0.0663      | -0.130633333 | -0.106066667 | -0.060933333 | 0.046866667  |
| LOC643310    | -0.211333333 | -0.0942      | 0.0037       | -0.0624      | 0.011666667  |
| GTPBP4       | 0.1832       | 0.042266667  | -0.162333333 | 0.1954       | 0.1275       |
| TMX3         | 0.0545       | -0.071733333 | -0.053766667 | 0.023866667  | 0.2574       |
| MSTRB2       | -0.670133333 | -0.264933333 | 0.297366667  | -0.405366667 | -0.048733333 |
| MRPS23       | 0.067166667  | -0.001266667 | -0.119333333 | 0.008433333  | 0.0849       |
| DNMT1        | 0.249933333  | -0.0728      | 0.016933333  | 0.188        | 0.128433333  |
| ZFYVE16      | -0.301733333 | -0.178266667 | -0.029966667 | -0.097166667 | -0.037233333 |
| MSN          | 0.092633333  | 0.014766667  | -0.1344      | 0.1822       | 0.060733333  |
| PIGB         | -0.1773      | -0.172333333 | 0.0856       | -0.007566667 | -0.0943      |
| PIGG         | -0.046466667 | -0.051533333 | -0.050233333 | -0.006966667 | 0.052133333  |
| LOC100133916 | -0.0411      | 0.0055       | 0.0153       | 0.041866667  | 0.235566667  |
| RSPRY1       | -0.125566667 | -0.145033333 | 0.051066667  | 0.0619       | 0.063366667  |
| FGFR1OP2     | -0.213       | -0.059166667 | 0.014466667  | 0.0706       | 0.222466667  |
| GOSR2        | 0.061833333  | -0.1262      | -0.0599      | 0.101        | 0.058233333  |
| MIR1228      | 0.147666667  | -0.116866667 | 0.013        | 0.264666667  | 5.00E-04     |
| AURKB        | 0.3602       | 0.114733333  | -0.071966667 | 0.464833333  | 0.125433333  |
| LOC653066    | 0.206566667  | 0.0249       | -0.056966667 | 0.277233333  | 0.117333333  |
| TBC1D2       | 0.241433333  | 0.181266667  | -0.148       | 0.258066667  | 0.2367       |
| MEAF6        | -0.057933333 | 0.078633333  | -0.0769      | 0.0393       | 0.206        |
| LOC728026    | -0.1092      | 0.2484       | -0.340966667 | -0.004166667 | 0.192266667  |
| SLC5A10      | -0.060766667 | -0.049033333 | -0.2453      | 0.070466667  | -0.0999      |
| SMAP1        | -0.052866667 | -0.079133333 | 0.002533333  | 0.145766667  | -0.0029      |
| PHYH         | -0.591433333 | -0.376366667 | 0.022966667  | -0.4433      | -0.104466667 |
| PHKG2        | -0.0308      | -0.144633333 | 0.009233333  | 0.155333333  | -0.037466667 |
| PITPNC1      | 0.064733333  | -0.0274      | 0.0338       | 0.006133333  | 0.183166667  |
| SLMAP        | 0.076133333  | 0.0161       | -0.089433333 | 0.1832       | 0.164466667  |
| FOXK2        | 0.0705       | 0.0212       | -0.074966667 | 0.144033333  | 0.125766667  |
| TRIM47       | -0.0323      | -0.4277      | -0.038533333 | -0.037733333 | -0.081266667 |
| OCA2         | -0.017866667 | -0.0938      | -0.177133333 | 0.021933333  | 0.0327       |
| YIPF6        | -0.118933333 | -0.1705      | 0.028466667  | -0.002433333 | 0.0492       |
| ZCWPW1       | -0.152366667 | -0.1091      | -0.3355      | -0.0575      | 0.0241       |
| LOC399748    | 0.040833333  | -0.091166667 | 0.063733333  | 0.133666667  | 0.075933333  |
| SDF2L1       | 0.069966667  | -0.078433333 | 0.1501       | 0.002566667  | 0.350266667  |
| ATP11C       | 0.042433333  | 0.014633333  | 0.106966667  | 0.037933333  | 0.377133333  |
| MCTS1        | -0.3215      | -0.045966667 | -0.139933333 | -0.164766667 | 0.095966667  |
| SFRS13A      | 0.010433333  | 0.134933333  | -0.047966667 | 0.005033333  | 0.187        |
| MLLT10       | -0.0453      | 0.027333333  | -0.081766667 | 0.1051       | 0.044566667  |
| LOC100130171 | 0.044766667  | 0.0748       | 0.022666667  | 0.278133333  | 0.119333333  |
| HIF1A        | -0.072966667 | -0.1992      | 0.0081       | 0.059633333  | 0.081533333  |
| FAM39E       | -0.1887      | -0.1011      | -0.078933333 | -0.073466667 | 0.1002       |
| LOC653566    | 0.2072       | 0.113266667  | -0.041833333 | 0.382533333  | 0.105533333  |
| PRMT7        | 0.047366667  | 0.102366667  | -0.144566667 | 0.0935       | 0.049966667  |
| CRYBA2       | -0.005833333 | 0.079533333  | -0.0407      | 0.2075       | -0.000333333 |
| CDCA2        | 0.211533333  | 0.048566667  | -0.1596      | 0.3759       | 0.017566667  |

|              |              |              |              |              |              |
|--------------|--------------|--------------|--------------|--------------|--------------|
| FAM14B       | -0.148466667 | -0.0961      | -0.043666667 | 0.0148       | 0.0755       |
| HDDC2        | -0.0552      | -0.1009      | -0.2275      | 0.0453       | -0.050933333 |
| NCRNA00200   | 0.038533333  | -0.065166667 | -0.1275      | 0.064866667  | -0.009633333 |
| TMEM54       | -0.254966667 | -0.2056      | 0.012666667  | -0.061666667 | -0.1092      |
| MAPK8IP3     | -0.029866667 | -0.1922      | -0.052433333 | 0.0521       | -0.0668      |
| DHX37        | 0.1406       | 0.0223       | -0.085166667 | 0.198233333  | 0.17         |
| LOC728758    | -0.0488      | -0.037666667 | -0.174933333 | 0.077766667  | 0.125133333  |
| SERPINB1     | -0.714233333 | -0.265166667 | 0.3146       | -0.3739      | -0.231033333 |
| FAM32A       | 0.072233333  | -0.0325      | -0.047066667 | 0.054533333  | 0.124566667  |
| IFNAR1       | -0.0562      | -0.051833333 | -0.0139      | 0.0865       | 0.114166667  |
| CCT6P1       | -0.054933333 | 0.1771       | -0.212133333 | 0.1304       | 0.161366667  |
| LOC100130263 | -0.318433333 | 0.1102       | -0.087133333 | -0.023166667 | 0.1287       |
| LOC647099    | -0.0243      | -0.040333333 | -0.1143      | 0.043866667  | 0.0385       |
| LOC652615    | 0.244533333  | -0.0517      | -0.111166667 | 0.1289       | 0.115233333  |
| FGF18        | -0.1355      | 0.0832       | -0.1637      | 0.083633333  | 0.080133333  |
| SRP19        | -0.018333333 | -0.105833333 | -0.127166667 | 0.0518       | -0.092433333 |
| MRS2         | 0.090133333  | -0.0445      | -0.171433333 | 0.180566667  | -0.001       |
| TERF2IP      | -0.024166667 | -0.0542      | 0.0389       | 0.1709       | 0.0137       |
| RETSAT       | -0.068933333 | -0.310166667 | -0.0639      | -0.040366667 | -0.0327      |
| LRP10        | -0.379033333 | -0.1997      | 0.109566667  | -0.154566667 | -0.0518      |
| VARS         | -0.199333333 | -0.0624      | 0.123933333  | -0.016833333 | 0.0441       |
| RABEPK       | 0.072133333  | -0.008766667 | -0.133766667 | 0.0656       | 0.151466667  |
| RASAL3       | -0.0122      | -0.127933333 | 0.112466667  | 0.1353       | 0.0354       |
| FIP1L1       | 0.2268       | 0.0041       | 0.065566667  | 0.280733333  | 0.119933333  |
| ING5         | 0.1872       | 0.059733333  | -0.110766667 | 0.282766667  | 0.1478       |
| HEBP1        | -0.351966667 | -0.221466667 | 0.008533333  | -0.126366667 | -0.036133333 |
| C12orf44     | 0.0854       | 0.008433333  | -0.046133333 | 0.1953       | 0.173233333  |
| LOC654161    | -0.049333333 | -0.2081      | -0.054566667 | 0.010733333  | -0.082333333 |
| FBXL15       | -0.3159      | -0.1682      | 0.010833333  | -0.0994      | -0.0475      |
| TTLL5        | -0.152833333 | -0.0755      | -0.0541      | 0.0501       | -0.008266667 |
| GPR137B      | -0.2233      | -0.275466667 | 0.062466667  | -0.159233333 | -0.0626      |
| NAV2         | -0.192633333 | -0.0081      | 0.028333333  | -0.205466667 | 0.062166667  |
| ZNF26        | 0.155366667  | 0.0247       | -0.286366667 | 0.234633333  | -0.0918      |
| MED31        | 0.123933333  | -0.102466667 | 0.123266667  | 0.218233333  | 0.062466667  |
| KIAA1704     | -0.1805      | 0.049266667  | 0.045233333  | 0.060633333  | -0.0179      |
| TXN          | -0.091666667 | 0.029066667  | -0.126733333 | 0.047033333  | 0.058133333  |
| TTLL4        | 0.088333333  | -0.2023      | -0.0587      | 0.0703       | 0.031066667  |
| ZNF37A       | 0.103533333  | 0.017633333  | -0.0977      | -0.054933333 | 0.362666667  |
| PDHX         | 0.175966667  | -0.1058      | 0.025966667  | 0.3046       | 0.021533333  |
| SMARCD1      | 0.104666667  | -0.1428      | -0.0575      | 0.0834       | -0.089766667 |
| LOC646808    | -0.165733333 | -0.118933333 | 0.0245       | 0.0419       | -0.002033333 |
| NOL3         | -0.288933333 | -0.262566667 | 0.102766667  | -0.148466667 | -0.010933333 |
| KLK3         | 0.347766667  | -0.162466667 | -0.344733333 | 0.229433333  | -0.075766667 |
| XPNPEP3      | 0.017766667  | 0.087433333  | -0.1209      | 0.065833333  | 0.042866667  |
| LOC25845     | -0.155333333 | -0.096033333 | 0.0362       | 0.069933333  | -0.0168      |
| DPH2         | 0.186866667  | -0.0245      | 0.0729       | 0.270066667  | 0.137333333  |
| WDR20        | 0.0836       | -0.107266667 | -0.185166667 | 0.112933333  | 0.063333333  |

|              |              |              |              |              |              |
|--------------|--------------|--------------|--------------|--------------|--------------|
| FOXF2        | 0.216466667  | -0.1693      | -0.0498      | 0.290433333  | -0.0238      |
| BEX2         | -0.4946      | -0.353466667 | -0.351       | -0.3056      | -0.249133333 |
| C1orf89      | -0.258866667 | -0.116433333 | -0.004333333 | -0.094866667 | -0.033766667 |
| TMEM117      | -0.271066667 | -0.110566667 | -0.066733333 | -0.327033333 | 0.017066667  |
| AKAP10       | -0.031066667 | -0.0976      | 0.270766667  | 0.2229       | 0.119066667  |
| PSMD12       | 0.136066667  | -0.1006      | -0.0133      | 0.1982       | 0.14         |
| THYN1        | -0.0414      | -0.188733333 | -0.008333333 | 0.005833333  | 0.094233333  |
| FBXO18       | -0.182233333 | -0.1024      | 0.039766667  | -0.051466667 | 0.054933333  |
| VPS18        | -0.046966667 | -0.1745      | -0.0461      | 0.093666667  | -0.0725      |
| GPR176       | 0.025833333  | -0.205033333 | -0.1817      | 0.109166667  | -0.017666667 |
| FAM174A      | -0.102733333 | -0.165766667 | -0.067266667 | 0.0038       | -0.045266667 |
| NEO1         | -0.102933333 | -0.243966667 | 0.0783       | -0.104833333 | -0.0454      |
| CDC2L1       | 0.021666667  | -0.1367      | -0.0031      | 0.143566667  | -0.048366667 |
| LOC100129436 | -0.1136      | 0.0321       | -0.0442      | -0.034666667 | 0.1862       |
| SNORD4A      | 0.347733333  | -0.0193      | -0.159566667 | 0.166933333  | 0.130566667  |
| BTN3A2       | -0.227633333 | -0.100066667 | 0.028533333  | -0.1911      | 0.031766667  |
| YWHAQ        | 0.029566667  | -0.143       | -0.070366667 | 0.033166667  | 0.1002       |
| UTP15        | 0.234466667  | 0.0312       | -0.063866667 | 0.282033333  | 0.2404       |
| LOC727914    | -0.2658      | 0.035433333  | -0.1774      | -0.186166667 | 0.090633333  |
| CREB1        | -0.182966667 | 0.445633333  | 0.0955       | 0.0706       | 0.316533333  |
| C5orf24      | -0.060933333 | -0.097266667 | 0.0839       | 0.092866667  | 0.100666667  |
| FHOD1        | 0.260033333  | 0.032933333  | 0.292033333  | 0.303        | 0.2462       |
| PAK1IP1      | 0.1867       | 0.122233333  | -0.189766667 | 0.1979       | 0.383266667  |
| CCNK         | 0.152166667  | -0.0523      | -0.200366667 | 0.0968       | 0.059333333  |
| SNORA73B     | 0.019733333  | 0.0416       | -0.056533333 | 0.1096       | 0.020966667  |
| LOC728602    | -0.379566667 | 0.089466667  | -0.3048      | -0.259133333 | 0.022933333  |
| POLD3        | 0.0605       | -0.0167      | -0.046466667 | 0.262933333  | 0.012866667  |
| FANCG        | 0.171766667  | 0.0204       | -0.118133333 | 0.200533333  | 0.013133333  |
| COX17        | 0.1257       | -0.1233      | 0.109533333  | 0.021033333  | 0.2219       |
| LEMD2        | -0.1396      | 0.0157       | -0.098033333 | 0.028066667  | 0.028866667  |
| AFF4         | 0.0274       | -0.150933333 | 0.085466667  | 0.1322       | -0.006833333 |
| PABPC1       | -0.2086      | -0.049433333 | -0.1211      | 0.083666667  | -0.081266667 |
| MSTO1        | 0.009        | 0.0311       | -0.279433333 | 0.0216       | 0.2007       |
| ZFP91        | 0.1278       | -0.073866667 | 0.1597       | 0.198366667  | 0.124533333  |
| C3orf21      | -0.037066667 | -0.004766667 | -0.109433333 | -0.058033333 | 0.1312       |
| NAB2         | -0.060533333 | 0.004933333  | 0.2381       | 0.256566667  | -0.032466667 |
| AMPH         | -0.015166667 | -0.0568      | -0.052166667 | 0.1016       | 0.0192       |
| LOC731432    | 0.141833333  | -0.0438      | -0.119233333 | 0.146033333  | 0.163766667  |
| LAS1L        | 0.1722       | -0.016666667 | -0.1844      | 0.228266667  | 0.1258       |
| ARHGAP10     | 0.101166667  | -0.036233333 | 0.029733333  | 0.0943       | 0.150466667  |
| LOC100129086 | -0.032433333 | -0.0876      | -0.035066667 | -0.022933333 | 0.088        |
| TBC1D13      | -0.0681      | -0.188966667 | -0.1071      | -0.024833333 | -0.117133333 |
| RASSF5       | -0.032133333 | -0.253533333 | 0.0245       | 0.075266667  | -0.071866667 |
| HMGCS1       | 0.1406       | 0.176433333  | -0.1586      | 0.384266667  | 0.1432       |
| ATP6V1F      | -0.008066667 | -0.193633333 | -0.049133333 | -0.009866667 | -0.0482      |
| FLII         | 0.0288       | -0.036733333 | -0.013866667 | 0.193333333  | 0.051066667  |
| LOC390466    | -0.112466667 | -0.018533333 | 0.0977       | 0.100733333  | 0.147366667  |

|              |              |              |              |              |              |
|--------------|--------------|--------------|--------------|--------------|--------------|
| MT1E         | 0.0738       | 0.0581       | -0.027266667 | 0.0879       | 0.1662       |
| TIMM17B      | -0.2711      | -0.1115      | -0.060966667 | -0.042866667 | 0.081933333  |
| IFT172       | -0.0365      | -0.1358      | -0.020066667 | -0.0124      | 0.138666667  |
| RBM41        | -0.011233333 | -0.042766667 | -0.111833333 | 0.132366667  | 0.0214       |
| LOC730153    | 0.137633333  | -0.037833333 | -0.090233333 | 0.241533333  | -0.0158      |
| SNF8         | -0.1432      | -0.0848      | -0.0215      | -0.010466667 | 0.1437       |
| CD2BP2       | -0.1097      | -0.115833333 | 0.021566667  | -0.0088      | -0.0108      |
| ASTN2        | -0.265233333 | -0.061466667 | -0.024033333 | -0.0523      | 0.0492       |
| GSTO1        | -0.013266667 | -0.160833333 | -0.1124      | 0.1096       | -0.139033333 |
| SMC3         | -0.026266667 | 0.0552       | -0.0854      | 0.167533333  | 0.0296       |
| LOC100131785 | -0.2668      | -0.223766667 | -0.0057      | -0.051233333 | -0.015933333 |
| INTS12       | 0.056333333  | -0.080866667 | -0.025266667 | 0.161566667  | -0.024633333 |
| CYB5R3       | -0.208666667 | -0.0774      | -0.002066667 | -0.001433333 | -0.0279      |
| LUC7L2       | 0.060866667  | 0.003333333  | 0.0173       | 0.233066667  | 0.092733333  |
| WDR12        | 0.115333333  | 0.0016       | 0.002066667  | 0.1028       | 0.177333333  |
| ARMC1        | -0.0962      | 0.017066667  | -0.032433333 | 0.112366667  | 0.138066667  |
| SLC39A7      | -0.016       | -0.1392      | 0.062333333  | 0.2329       | -0.092866667 |
| MEIS1        | -0.030733333 | -0.025466667 | -0.140466667 | 0.0593       | -0.037166667 |
| ZNF142       | 0.163833333  | -0.1184      | -0.143933333 | 0.1433       | 0.0891       |
| GHDC         | -0.221266667 | -0.188066667 | 0.1369       | -0.0152      | -0.054133333 |
| PFAS         | 0.162266667  | -0.016066667 | -0.209533333 | 0.068866667  | 0.191566667  |
| SC4MOL       | -0.252633333 | -0.011466667 | 0.198        | -0.008166667 | 0.1698       |
| RNF11        | 0.126066667  | 0.062933333  | -0.1544      | 0.195033333  | 0.123166667  |
| GNRH1        | -0.045766667 | -0.0888      | 0.028033333  | 0.100566667  | 0.095766667  |
| AHSA1        | 0.021566667  | 0.190833333  | -0.0153      | 0.167266667  | 0.144633333  |
| CCDC76       | 0.049466667  | 0.0979       | -0.149766667 | 0.028033333  | 0.1138       |
| GGA2         | 0.024733333  | -0.080066667 | -0.104766667 | 0.1301       | -0.113733333 |
| CCT2         | 0.092566667  | 0.0502       | -0.0567      | 0.154666667  | 0.102933333  |
| LOC641727    | -0.1201      | -0.0389      | -0.1725      | -0.107433333 | 0.030766667  |
| PREI3        | 0.130333333  | 0.010066667  | -0.123033333 | 0.211866667  | 0.0883       |
| PHF20L1      | -0.2021      | -0.052466667 | -0.131233333 | 0.031133333  | 0.087866667  |
| TRIM7        | -0.009866667 | -0.040166667 | -0.003       | 0.0526       | 0.152866667  |
| USP7         | 0.237466667  | -0.085966667 | -0.012033333 | 0.190866667  | 0.059533333  |
| STX5         | 0.035333333  | -0.2165      | -0.086766667 | 0.058166667  | -0.064933333 |
| PLEKHH3      | -0.467       | -0.169866667 | 0.0326       | -0.243433333 | -0.087733333 |
| PPP1CC       | 0.1924       | -0.074533333 | -0.0481      | 0.154066667  | 0.182666667  |
| C3orf34      | -0.076566667 | 0.357533333  | -0.017533333 | 0.104433333  | 0.186233333  |
| MRLC2        | -0.025366667 | -0.199233333 | -0.0166      | 0.0644       | -0.024766667 |
| RPL38        | 0.088366667  | -0.2305      | -0.0664      | 0.030966667  | -0.006933333 |
| CTDSPL       | 0.2721       | 0.0657       | -0.0361      | 0.343533333  | 0.139366667  |
| MAEA         | 0.176533333  | 0.0306       | -0.015       | 0.252733333  | 0.084466667  |
| MRPL45       | -0.0914      | -0.060433333 | -0.074933333 | 0.1064       | 0.068066667  |
| LOC100132888 | -0.051733333 | 0.020166667  | -0.1935      | 0.092233333  | 0.005933333  |
| PRMT5        | 0.217666667  | -0.0323      | -0.219466667 | 0.2329       | 0.020433333  |
| NOP14        | 0.283066667  | 0.037566667  | -0.316433333 | 0.308966667  | 0.065933333  |
| FBXO42       | 0.093366667  | -0.2196      | 0.050166667  | 0.171566667  | -0.0625      |
| PFDN4        | -0.098966667 | 0.063666667  | 0.0037       | 0.115566667  | 0.1732       |

|              |              |              |              |              |              |
|--------------|--------------|--------------|--------------|--------------|--------------|
| ARID4B       | -0.326266667 | -0.225466667 | 0.329366667  | 0.0918       | -0.050333333 |
| CREBL2       | -0.150666667 | -0.010733333 | 0.052        | 0.099833333  | 0.0884       |
| VPS4A        | -0.008466667 | -0.066133333 | -0.1332      | 0.005166667  | 0.07         |
| NEDD4        | 0.186866667  | 0.0519       | -0.1442      | 0.2899       | 0.083033333  |
| DNLZ         | -0.0142      | -0.019266667 | -0.163566667 | -0.0084      | 0.1971       |
| FDX1L        | -0.175266667 | -0.004533333 | -0.043233333 | 0.054833333  | 0.0592       |
| RAB11FIP2    | 0.101233333  | 0.0234       | -0.1178      | 0.1663       | 0.0841       |
| C8orf30B     | 0.190433333  | 0.0628       | -0.211833333 | 0.255533333  | -0.004       |
| RILPL1       | -0.291966667 | -0.2211      | 0.246566667  | -0.1256      | 0.092033333  |
| RBMX2        | -0.011766667 | 0.0179       | -0.334333333 | 0.069833333  | -0.0951      |
| FLJ35801     | -0.187466667 | -0.0045      | 0.080733333  | -0.1685      | 0.2146       |
| GOLGB1       | -0.292266667 | -0.1774      | -0.0696      | -0.256733333 | -0.0823      |
| QTRT1        | 0.012666667  | -0.0239      | -0.079766667 | 0.079966667  | 0.102366667  |
| TSG101       | -0.180466667 | -0.1622      | 0.016833333  | -0.055766667 | 0.003233333  |
| MTERFD1      | 0.140033333  | -0.062333333 | -0.040633333 | 0.174566667  | 0.060633333  |
| SPATS2       | -0.286066667 | 0.080366667  | 0.1047       | 0.027566667  | -0.022666667 |
| STK24        | 0.1318       | -0.055733333 | -0.021466667 | 0.018433333  | 0.100366667  |
| UBA7         | -0.197066667 | -0.173033333 | -0.0782      | -0.151133333 | 0.011233333  |
| HIP1         | -0.150466667 | -0.217533333 | 0.1681       | -0.0645      | 0.0518       |
| HRK          | -0.368966667 | -0.206366667 | -0.3242      | -0.311933333 | -0.239966667 |
| DERL2        | -0.0403      | 0.066233333  | 0.0065       | 0.068566667  | 0.049866667  |
| B4GALNT1     | -0.122966667 | -0.0802      | 0.176566667  | -0.0074      | 0.091233333  |
| ZNF654       | -0.085466667 | -0.136433333 | 0.115033333  | 0.059533333  | 0.099166667  |
| LOC100131707 | -0.268033333 | -0.185166667 | -0.0578      | -0.2337      | 0.081133333  |
| ROPN1L       | -0.123433333 | 0.078233333  | 0.012633333  | 0.041433333  | 0.086233333  |
| MCCC2        | 0.056233333  | -0.073833333 | 0.118966667  | 0.182433333  | 0.1021       |
| C12orf31     | 0.179566667  | -0.002133333 | -0.313866667 | 0.0962       | 0.146733333  |
| DTX2         | -0.003633333 | 0.031133333  | -0.174866667 | 0.047966667  | 0.052933333  |
| LOC202051    | -0.241333333 | -0.022666667 | 0.139        | -0.119633333 | 0.141133333  |
| ALDH9A1      | 0.003766667  | -0.078833333 | 0.0441       | 0.061533333  | 0.1178       |
| CLIC1        | 0.0255       | -0.055133333 | 0.258466667  | 0.057833333  | 0.262133333  |
| WRNIP1       | 0.1693       | -0.0702      | -0.084566667 | 0.1635       | 0.024733333  |
| WASL         | 0.002933333  | -0.020466667 | 0.069433333  | 0.181333333  | 0.093        |
| CAPZA1       | -0.349433333 | 0.191266667  | -0.312033333 | -0.147066667 | 0.171433333  |
| CCDC102A     | -0.254333333 | -0.017733333 | 0.134966667  | 0.0261       | 0.028233333  |
| C10orf26     | -0.1486      | -0.0936      | 0.011433333  | -0.006833333 | 0.064366667  |
| PRPF40A      | -0.134566667 | 0.076533333  | 0.064033333  | 0.0702       | 0.2197       |
| ZNF136       | 0.0177       | 0.050666667  | 0.023733333  | 0.144833333  | 0.1098       |
| PRPF6        | 0.241566667  | -0.087633333 | -0.131066667 | 0.133066667  | 0.060533333  |
| RCE1         | 0.239066667  | 0.009733333  | -0.067433333 | 0.275266667  | 0.077233333  |
| LOC643224    | 0.053066667  | -0.005333333 | -0.010066667 | 0.0998       | 0.005333333  |
| BRCC3        | 0.085133333  | -0.0842      | -0.098733333 | 0.116733333  | 0.038833333  |
| TRMU         | 0.1868       | 0.000566667  | -0.0383      | 0.235433333  | 0.138033333  |
| CSAG3B       | -0.088166667 | -0.364233333 | 0.0162       | -0.106433333 | -0.012233333 |
| PRIM2A       | 0.214        | 0.0583       | -0.0951      | 0.224133333  | 0.143933333  |
| STX8         | -0.311933333 | -0.014033333 | -0.035666667 | -0.0528      | -0.081633333 |
| CHCHD7       | 0.2493       | -0.099133333 | -0.4486      | 0.305366667  | -0.061133333 |

|              |              |              |              |              |              |
|--------------|--------------|--------------|--------------|--------------|--------------|
| LOC729101    | 0.041266667  | 0.0192       | -0.064233333 | 0.1096       | 0.161133333  |
| CCDC43       | -0.1048      | 0.153033333  | -0.043633333 | 0.232866667  | 0.079        |
| UPF1         | 0.211533333  | 0.0116       | -0.082966667 | 0.363        | -0.1259      |
| TBCA         | 0.023966667  | -0.160966667 | -0.097633333 | 0.0633       | 0.0143       |
| ORC5L        | 0.060866667  | 0.1355       | -0.3289      | 0.1126       | 0.106266667  |
| ZNF341       | 0.052866667  | -0.054933333 | -0.136133333 | -0.059033333 | 0.123333333  |
| ARL2BP       | -0.025233333 | -0.0449      | -0.144533333 | -0.023466667 | 0.0437       |
| ARL4D        | -0.0086      | -0.0495      | -0.190266667 | -0.034733333 | 0.087566667  |
| LOC100133607 | 0.0763       | -0.147133333 | -0.030566667 | 0.095466667  | 0.0371       |
| ZNF717       | -0.1426      | 0.014266667  | -0.102833333 | -0.161133333 | 0.0511       |
| PLAA         | 0.0157       | -0.021       | -0.150766667 | 0.122333333  | 0.091866667  |
| RHBDD1       | -0.1879      | -0.079366667 | -0.096366667 | -0.267333333 | 0.133        |
| ALKBH1       | 0.209933333  | 0.015        | -0.110633333 | 0.318966667  | 0.084166667  |
| ACVR1        | -0.1322      | -0.196733333 | -0.0976      | -0.219933333 | 0.045733333  |
| ATG4D        | 0.0907       | -0.058433333 | -0.090666667 | 0.195333333  | 0.023666667  |
| GADD45B      | 0.183766667  | -0.030766667 | -0.4471      | 0.3531       | -0.165933333 |
| SNORD36C     | 0.180666667  | -0.0811      | -0.0899      | -0.016366667 | 0.131433333  |
| ATPIF1       | -0.357733333 | -0.126433333 | 0.0422       | -0.2114      | 0.053466667  |
| CAP1         | 0.055566667  | -0.113       | -0.0792      | 0.053666667  | 0.0343       |
| UBXN11       | -0.0974      | -0.008       | -0.1339      | 0.058866667  | -0.0813      |
| EFCAB7       | -0.386533333 | -0.171       | -0.259666667 | -0.2233      | -0.234       |
| ZNF783       | 0.071533333  | -0.0244      | -0.137233333 | 0.1693       | -0.0048      |
| YOD1         | 0.145833333  | 0.235133333  | -0.2067      | 0.307333333  | 0.152966667  |
| ZNF28        | -0.1203      | 0.053966667  | -0.1715      | -0.026133333 | 0.0202       |
| CLOCK        | -0.025633333 | -0.080066667 | -0.024166667 | 0.122666667  | 0.0501       |
| RBMS2P       | 0.191266667  | 0.032166667  | -0.0009      | 0.304633333  | 0.053466667  |
| SLC16A10     | 0.219866667  | -0.022333333 | -0.049166667 | 0.058733333  | 0.194766667  |
| RPS16        | 0.0952       | -0.194966667 | -0.093266667 | 0.032333333  | 0.047366667  |
| ARFGAP2      | -0.2371      | -0.118       | -0.0322      | -0.023633333 | -0.0172      |
| FKBP11       | 0.016633333  | 0.0167       | -0.0046      | 0.182433333  | 0.101166667  |
| LOC642897    | -0.009433333 | -0.07        | -0.0798      | 0.035633333  | 0.0311       |
| LOC100131009 | -0.057866667 | -0.004       | -0.0629      | 0.1272       | 0.0129       |
| KIAA1751     | -0.1625      | 0.7458       | -0.086833333 | 0.012333333  | 0.454166667  |
| LOC283788    | -0.1884      | -0.006933333 | -0.040833333 | -0.062666667 | 0.0701       |
| SNX2         | -0.064533333 | -0.1324      | -0.2398      | -0.0587      | -0.042533333 |
| ID2          | -0.403633333 | 0.103333333  | -0.3952      | -0.298966667 | -0.074       |
| DAPK3        | 0.1232       | 0.010866667  | -0.207066667 | 0.262033333  | -0.030533333 |
| LOC642236    | -0.447133333 | -0.106533333 | -0.158566667 | -0.189       | -0.0455      |
| IRF2         | -0.009266667 | -0.112       | -0.099566667 | -0.032766667 | 0.110733333  |
| GBA          | -0.210866667 | -0.3388      | -0.156133333 | -0.1561      | -0.0823      |
| HERC2P4      | 0.189533333  | -0.049833333 | -0.1968      | 0.1224       | 0.023466667  |
| BTN3A3       | -0.1656      | -0.141766667 | 0.011166667  | -0.078133333 | 0.018333333  |
| LOC643031    | -0.337266667 | -0.139566667 | -0.131666667 | -0.036333333 | -0.151733333 |
| THOC5        | -0.285066667 | -0.1312      | 0.064866667  | -0.046433333 | -0.0699      |
| CMTM4        | -0.062033333 | -0.1321      | -0.005466667 | -0.1035      | 0.043133333  |
| HCCA2        | -0.0163      | -0.050066667 | -0.067633333 | 0.134466667  | 0.019266667  |
| NCRNA00153   | -0.230733333 | -0.009333333 | -0.101033333 | 0.017433333  | 0.0525       |



|              |             |             |             |             |             |
|--------------|-------------|-------------|-------------|-------------|-------------|
| GLE1         | -0.01766667 | -0.22833333 | 0.02526667  | 0.06946667  | -0.0544     |
| C5orf35      | -0.0303     | -0.03153333 | -0.016      | 0.15153333  | 0.01113333  |
| LOC648771    | -0.13753333 | -0.26186667 | -0.0507     | -0.02393333 | 0.01143333  |
| KIAA0664     | 0.2527      | -0.0357     | -0.09956667 | 0.31703333  | 0.11676667  |
| RRP7B        | 0.00316667  | -0.20586667 | -0.08926667 | 0.04463333  | -0.02313333 |
| ORAOV1       | 0.359       | 0.05156667  | -0.23613333 | 0.35776667  | 0.042       |
| FAM70A       | -0.07046667 | -0.25993333 | 0.0112      | -0.0408     | -0.02586667 |
| C1orf77      | 0.16926667  | -0.0263     | -0.03493333 | 0.19346667  | 0.0172      |
| CDC42EP3     | 0.12316667  | 0.16266667  | 0.01276667  | 0.35273333  | 0.16156667  |
| GAMT         | -0.14423333 | -0.15336667 | 0.0385      | -0.05596667 | 0.08056667  |
| MIR586       | 0.12913333  | -0.04993333 | 0.08256667  | 0.12136667  | 0.02316667  |
| MGC42630     | -0.1635     | -0.10633333 | -0.10826667 | 0.00016667  | -0.10053333 |
| DDX3X        | 0.22193333  | -0.02556667 | -0.10416667 | 0.18296667  | 0.07673333  |
| HNRNPH2      | -0.3204     | 0.0627      | -0.10046667 | -0.14106667 | 0.14806667  |
| ALKBH5       | 0.01556667  | -0.0834     | -0.01513333 | 0.06176667  | -0.0083     |
| BCAP31       | -0.19303333 | -0.0376     | -0.07206667 | 0.00173333  | 0.07086667  |
| LOC650638    | -0.06493333 | 0.01916667  | -0.12093333 | 0.0814      | 0.02196667  |
| WAC          | -0.0377     | -0.07953333 | -0.06013333 | 0.09066667  | 0.0667      |
| DCLRE1A      | 0.04426667  | 0.04113333  | -0.0651     | 0.19293333  | 0.0012      |
| MRPS7        | 0.07086667  | -0.00593333 | -0.23233333 | 0.00063333  | 0.16823333  |
| CCDC14       | -0.0591     | -0.01653333 | -0.21       | 0.00613333  | 0.02693333  |
| LOC100134182 | -0.2734     | -0.16323333 | 0.14933333  | 0.11176667  | -0.14563333 |
| C11orf74     | -0.25163333 | -0.10263333 | -0.03153333 | -0.03226667 | 0.0064      |
| ATL1         | -0.11506667 | -0.04863333 | -0.05193333 | 0.0264      | 0.02203333  |
| SRPX         | 6.67E-05    | -0.1828     | -0.04606667 | -0.04053333 | -0.00826667 |
| DFFA         | 0.1057      | -0.18186667 | 0.08843333  | 0.18113333  | -0.0487     |
| RAB3IL1      | 0.0447      | -0.07513333 | -0.31306667 | 0.13206667  | -0.05553333 |
| HIC2         | 0.0806      | 0.03456667  | -0.0093     | 0.26136667  | 0.079       |
| SIX4         | 0.1136      | -0.00173333 | 0.2273      | 0.34653333  | 0.06173333  |
| KLHL8        | 0.21853333  | 0.06343333  | 0.0128      | 0.2123      | 0.11        |
| LOC728031    | -0.211      | -0.08956667 | 0.0491      | -0.02403333 | 0.036       |
| FAM160A2     | -0.05136667 | -0.18846667 | 0.04003333  | 0.066       | 0.00156667  |
| LOC648927    | 0.17236667  | -0.09773333 | 0.046       | 0.30653333  | 0.0245      |
| PHLDA3       | -0.1522     | -0.2431     | -0.2186     | -0.0619     | -0.16063333 |
| TJP2         | 0.39126667  | 0.0236      | -0.0409     | 0.3904      | 0.25636667  |
| CUTA         | -0.33903333 | -0.10376667 | -0.0393     | -0.2098     | 0.06593333  |
| LOC643507    | 0.00053333  | 0.03903333  | -0.00596667 | 0.20526667  | 0.08816667  |
| APOLD1       | 0.0197      | -0.00603333 | -0.13026667 | 0.05146667  | 0.14996667  |
| SPOPL        | 0.12213333  | -0.03446667 | 0.03576667  | 0.1476      | 0.2539      |
| WDR1         | 0.41973333  | -0.05463333 | -0.01386667 | 0.22293333  | 0.1683      |
| EXTL3        | 0.04743333  | -0.06026667 | -0.02126667 | 0.17803333  | 0.01676667  |
| SERP1        | -0.07856667 | -0.13493333 | -0.01183333 | -0.04583333 | 0.13146667  |
| ARPC4        | 0.10853333  | -0.02126667 | -0.09856667 | 0.13283333  | 0.12956667  |
| MAGEA4       | 0.07663333  | -0.0501     | 0.11016667  | 0.056       | 0.09513333  |
| ZC3H8        | 0.14893333  | -0.0134     | -0.14376667 | 0.2541      | -0.0095     |
| AGPAT6       | 0.15076667  | -0.0921     | -0.02406667 | 0.17133333  | -0.0232     |
| NCRNA00094   | -0.14966667 | -0.12376667 | -0.10643333 | -0.0475     | 0.04793333  |

|              |              |              |              |              |              |
|--------------|--------------|--------------|--------------|--------------|--------------|
| PLA2G7       | 0.207366667  | 0.075        | -0.075133333 | 0.2578       | 0.1307       |
| LOC644360    | 0.086566667  | -0.0573      | 0.057433333  | 0.168266667  | -0.134333333 |
| CEP63        | -0.2211      | 0.057466667  | -0.093766667 | -0.000533333 | 0.003333333  |
| PRKCABP      | -0.0475      | -0.042966667 | -0.095633333 | 0.083333333  | -0.137833333 |
| KLHL23       | 0.135        | -0.008866667 | 0.0277       | 0.3254       | 0.0671       |
| HNRNPA3      | 0.049566667  | 0.219233333  | 0.036966667  | 0.226666667  | 0.1618       |
| SFRS17A      | 0.234633333  | -0.0678      | -0.167733333 | 0.1689       | 0.050166667  |
| DNAJB12      | -0.157233333 | 0.031333333  | -0.070433333 | -0.0703      | 0.048233333  |
| NPAS2        | -0.158033333 | 0.022966667  | 0.274866667  | -0.1015      | 0.079466667  |
| LOC730024    | 0.083333333  | -0.040166667 | -0.315966667 | 0.029833333  | -0.1064      |
| NRP2         | 0.097233333  | -0.334133333 | -0.0705      | 0.046166667  | -0.142833333 |
| ACSL4        | -0.171633333 | -0.021       | 0.264666667  | -0.020266667 | 0.047166667  |
| LOC643452    | -0.180166667 | 0.0847       | 0.101366667  | 0.065433333  | 0.070733333  |
| APTX         | -0.0768      | -0.0394      | -0.2455      | 0.088033333  | 0.035633333  |
| INO80E       | 0.2084       | -0.093466667 | 0.0282       | 0.059333333  | 0.177433333  |
| C4orf43      | 0.099933333  | 0.148633333  | 0.036333333  | 0.1514       | 0.213666667  |
| RFP          | 0.050366667  | 0.084333333  | -0.0123      | 0.2138       | 0.039533333  |
| C8orf51      | -0.043       | -0.089966667 | -0.106633333 | -0.040666667 | -0.058233333 |
| PFKFB2       | -0.141866667 | -0.037633333 | -0.1131      | -0.0547      | 0.0873       |
| LOC641992    | -0.1074      | 0.293566667  | -0.114633333 | 0.0151       | 0.395066667  |
| HNRPH1       | 0.1058       | 0.081566667  | 0.003666667  | 0.230766667  | 0.1215       |
| C1orf198     | -0.1112      | -0.062733333 | -0.236233333 | 0.0324       | -0.078466667 |
| BOLA2        | -0.0957      | 0.210833333  | -0.1651      | 0.029333333  | 0.1723       |
| PAG1         | 0.134033333  | -0.0103      | 0.007733333  | 0.0139       | 0.164        |
| LOC100130562 | 0.094766667  | -0.110766667 | -0.1978      | 0.209066667  | 0.0172       |
| RAB5C        | 0.2642       | -0.1673      | 0.186666667  | 0.1943       | 0.0496       |
| B3GNTL1      | -0.1112      | 0.1476       | 0.0259       | -0.018966667 | 0.2137       |
| GSTM3        | 0.038433333  | -0.073066667 | -0.0996      | 0.0131       | 0.1499       |
| FAM120AOS    | -0.084066667 | -0.2189      | -0.0912      | -0.206033333 | 0.075033333  |
| ISOC1        | 0.082533333  | 0.052366667  | -0.064766667 | 0.098366667  | 0.226333333  |
| GGA3         | -0.076633333 | -0.006066667 | -0.226666667 | 0.0193       | 0.047866667  |
| LOC389203    | -0.058066667 | -0.0858      | -0.131       | 0.0345       | 0.0413       |
| TRIM32       | 0.053433333  | -0.025966667 | -0.0569      | 0.043966667  | 0.052033333  |
| ZCCHC6       | -0.1995      | -0.153166667 | 0.056566667  | -0.122266667 | -0.1306      |
| RAI14        | 0.1145       | -0.139533333 | 0.041366667  | 0.023733333  | 0.1299       |
| NSUN5C       | 0.075033333  | -0.071966667 | 0.003233333  | 0.140233333  | 0.176233333  |
| GLA          | 0.263533333  | -0.0476      | -0.279633333 | 0.244        | 0.054666667  |
| EDF1         | -0.197866667 | -0.147966667 | 0.008        | 0.012166667  | -0.1449      |
| LOC100131643 | 0.063966667  | 0.0175       | -0.238933333 | 0.189166667  | -0.108833333 |
| GSPT1        | 0.108666667  | 0.008        | -0.0376      | 0.173566667  | 0.0966       |
| TDO2         | -0.148766667 | 0.0409       | -0.111566667 | 0.008666667  | 0.070433333  |
| LOC389168    | 0.134666667  | -0.140633333 | -0.062833333 | 0.145466667  | 0.093666667  |
| STIL         | 0.166        | 0.1237       | -0.2144      | 0.116533333  | 0.069766667  |
| TACO1        | -0.087566667 | -0.067133333 | -0.210866667 | 0.012466667  | -0.021533333 |
| LOC387791    | -0.135933333 | -0.1567      | 0.092866667  | 0.0888       | -0.021466667 |
| LONRF2       | -0.1981      | -0.105633333 | 0.013        | -0.087866667 | -0.028866667 |
| NACA         | 0.031066667  | -0.086733333 | 0.008766667  | 0.060766667  | 0.1519       |

|              |              |              |              |              |              |
|--------------|--------------|--------------|--------------|--------------|--------------|
| TIMM44       | -0.027866667 | -0.141733333 | -0.361266667 | -0.020666667 | -0.033833333 |
| METTL5       | -0.089533333 | -0.062266667 | -0.0443      | 0.0283       | 0.053433333  |
| LOC440776    | 0.0014       | 0.105        | -0.174966667 | 0.115766667  | 0.131        |
| HDLBP        | 0.1191       | 0.024033333  | -0.0645      | 0.1778       | 0.1338       |
| RTP4         | -0.085966667 | -0.110033333 | -0.0268      | 0.022333333  | -0.017466667 |
| TRERF1       | 0.062666667  | 0.006266667  | -0.0161      | 0.1492       | 0.1716       |
| DNCL1        | -0.014833333 | -0.061066667 | -0.004933333 | 0.067033333  | 0.0478       |
| EXOC5        | -0.0072      | 0.0076       | -0.191833333 | 0.134566667  | -0.030066667 |
| RPP25        | 0.514066667  | -0.025366667 | -0.2018      | 0.404566667  | 0.076466667  |
| SP1          | -0.113533333 | 0.050166667  | 0.008633333  | 0.0007       | 0.1617       |
| LOC647588    | -0.066233333 | -0.020133333 | -0.1229      | -0.029166667 | 0.119        |
| ZFR          | -0.085133333 | -0.228433333 | 0.032633333  | 0.072233333  | 0.109033333  |
| SDHAF2       | 0.075233333  | -0.1491      | -0.069766667 | 0.079666667  | 0.0595       |
| PLCXD1       | -0.086566667 | -0.120733333 | 0.030666667  | -0.170333333 | 0.0017       |
| PMM2         | 0.2732       | 0.0471       | -0.290366667 | 0.2309       | 0.002033333  |
| FXR2         | 0.344433333  | -0.062566667 | -0.055433333 | 0.311433333  | 0.078266667  |
| C17orf88     | 0.1226       | -0.109366667 | -0.004966667 | 0.134833333  | -0.025733333 |
| LOC729905    | -0.000566667 | -0.100866667 | -0.061166667 | 0.1389       | 0.0448       |
| DUS4L        | -0.140866667 | -0.166733333 | -0.0261      | 0.0179       | 0.0477       |
| SP140L       | -0.092033333 | -0.0539      | -0.020666667 | 0.010966667  | 0.0852       |
| LOC401357    | -0.028166667 | -0.212       | -0.0591      | -0.1471      | -0.0462      |
| STK39        | 0.132166667  | -0.061066667 | -0.036766667 | 0.090266667  | 0.1355       |
| SNORA64      | 0.026766667  | 0.0307       | -0.1998      | 0.0695       | 0.0476       |
| AGFG2        | 0.0998       | -0.1012      | 0.160733333  | 0.0667       | 0.210733333  |
| RBM15        | 0.059633333  | 0.141        | 0.011966667  | 0.159466667  | 0.063833333  |
| LOC440027    | -0.0139      | -0.099066667 | -0.101866667 | -0.103333333 | 0.045233333  |
| ECSIT        | 0.120166667  | -0.068866667 | -0.1236      | 0.155033333  | 0.050233333  |
| LOC100134304 | -0.122133333 | 0.1462       | -0.050066667 | 0.009433333  | 0.102333333  |
| ZDHC11       | 0.038133333  | 0.0284       | -0.0655      | -0.023266667 | 0.1245       |
| DUSP28       | -0.091866667 | -0.1258      | -0.212966667 | -0.084933333 | -0.044366667 |
| PAAF1        | -0.136066667 | -0.074033333 | -0.112866667 | 0.0264       | -0.017566667 |
| ENOSF1       | -0.102566667 | -0.196033333 | -0.0112      | -0.048266667 | 0.0012       |
| PIH1D2       | -0.078933333 | -0.0029      | -0.2464      | -0.0356      | 0.0255       |
| STXBP1       | 0.017533333  | -0.082933333 | -0.017166667 | -0.034433333 | 0.0896       |
| LOC100125556 | 0.035733333  | -0.084866667 | -0.121366667 | 0.078966667  | -0.0439      |
| RAD51L3      | -0.129566667 | -0.0967      | -0.006133333 | 0.087033333  | 0.054633333  |
| SNORA24      | 0.087866667  | -0.059366667 | -0.444833333 | -0.006533333 | 0.044833333  |
| LOC100134053 | -0.2092      | 0.625866667  | -0.162433333 | 0.0657       | 0.317433333  |
| C17orf58     | -0.022033333 | -0.302133333 | -0.0901      | -0.036966667 | -0.043966667 |
| SPSB3        | -0.311533333 | -0.0477      | -0.105766667 | -0.204433333 | 0.0296       |
| PPM1F        | 0.052866667  | 0.031066667  | -0.0119      | 0.1273       | 0.213466667  |
| ARCN1        | -0.000533333 | -0.035133333 | 0.067333333  | 0.217633333  | -0.013133333 |
| SCARNA18     | 0.067066667  | -0.117833333 | -0.1145      | 0.128666667  | 0.064033333  |
| BSDC1        | -0.1242      | -0.348766667 | 0.009733333  | -0.1225      | -0.029733333 |
| FAM90A3      | 0.0425       | -0.092733333 | 0.0622       | 0.239866667  | -0.069466667 |
| IPPK         | 0.236466667  | 0.096266667  | -0.108466667 | 0.313666667  | 0.095633333  |
| RAD50        | -0.116633333 | -0.187966667 | -0.0918      | -0.059566667 | 0.000633333  |

|              |              |              |              |              |              |
|--------------|--------------|--------------|--------------|--------------|--------------|
| WDR70        | -0.209666667 | -0.003333333 | -0.1139      | -0.0893      | 0.039933333  |
| C4orf47      | -0.086266667 | -0.057666667 | 0.022733333  | -0.0743      | 0.1136       |
| SIVA1        | 0.230533333  | -0.094533333 | -0.083033333 | 0.291566667  | 0.021766667  |
| GRB10        | -0.136633333 | -0.144666667 | -0.0882      | -0.122566667 | -0.015533333 |
| LOC100132444 | 0.060166667  | 0.0325       | -0.101733333 | 0.144966667  | 0.045066667  |
| GNA11        | 0.356733333  | -0.103233333 | 0.017866667  | 0.209666667  | 0.1108       |
| LOC647357    | -0.0703      | 0.077233333  | -0.068366667 | 0.111933333  | 0.152433333  |
| NFYC         | -0.167833333 | -0.050933333 | -0.036033333 | -0.004666667 | 0.0344       |
| SMCR7L       | 0.0554       | 0.0064       | -0.016633333 | 0.075333333  | 0.187        |
| TBC1D24      | 0.047666667  | -0.140333333 | 0.108866667  | 0.1949       | 0.1036       |
| RC3H2        | -0.031766667 | -0.1926      | 0.009666667  | 0.0205       | -0.054233333 |
| NTHL1        | -0.0137      | 0.018533333  | -0.067133333 | -0.040866667 | -0.006166667 |
| FAM3A        | -0.219133333 | -0.136133333 | -0.126833333 | -0.155233333 | -0.058266667 |
| PLEKHN1      | 0.182033333  | -0.172833333 | 0.006633333  | 0.126133333  | -0.0912      |
| LOC653354    | -0.124166667 | -0.022866667 | -0.006766667 | 0.0151       | 0.0685       |
| DLG4         | -0.024466667 | -0.067033333 | 0.1306       | 0.0924       | -0.0153      |
| NDUFAB1      | -0.077966667 | -0.044966667 | -0.008566667 | 0.075933333  | -0.015       |
| MAGED4B      | -0.2075      | -0.034266667 | -0.053533333 | -0.182833333 | 0.115833333  |
| HSPA4        | 0.005533333  | 0.171633333  | -0.219033333 | -0.0006      | 0.179933333  |
| KITLG        | -0.0171      | -0.0063      | -0.1257      | 0.014933333  | 0.2027       |
| ADSSL1       | 0.0085       | 0.0473       | -0.0814      | 0.2096       | 0.057033333  |
| TNPO1        | 0.425833333  | -0.085266667 | -0.058566667 | 0.447966667  | 0.225133333  |
| DEPDC1       | -0.0778      | 0.1899       | 0.030466667  | 0.193633333  | 0.1486       |
| KLHL13       | -0.027833333 | -0.075166667 | -0.083466667 | 0.0534       | 0.0851       |
| NFIC         | 0.069666667  | -0.230466667 | 0.040633333  | -0.012       | 0.137266667  |
| KIAA0133     | 0.1569       | 0.071833333  | -0.0406      | 0.307733333  | 0.059        |
| LOC100132060 | -0.0133      | -0.184566667 | -0.028433333 | 0.064933333  | -0.095833333 |
| MIR129-2     | -0.172666667 | -0.150333333 | 0.120566667  | 0.1116       | 0.000966667  |
| HSPA9        | -0.003566667 | -0.182933333 | -0.166966667 | -0.032166667 | -0.0833      |
| HPS6         | -0.022433333 | -0.074566667 | -0.096533333 | -0.002933333 | 0.014666667  |
| ABI1         | -0.1664      | -0.0596      | -0.038166667 | 0.025033333  | 0.0229       |
| PLAG1        | -0.173033333 | -0.185866667 | 0.044933333  | -0.031866667 | -0.000733333 |
| RNF121       | 0.081        | -0.056066667 | -0.186433333 | 0.081533333  | -0.004666667 |
| C20orf94     | -0.276233333 | -0.050633333 | -0.127633333 | -0.081966667 | 0.032133333  |
| LOC648024    | 0.285766667  | 0.013766667  | 0.062033333  | 0.2631       | 0.1577       |
| NOP58        | 0.234866667  | 0.0289       | -0.146133333 | 0.323666667  | 0.030166667  |
| C19orf42     | -0.071633333 | -0.069733333 | -0.386233333 | -0.044266667 | -0.110466667 |
| PGM1         | -0.687433333 | -0.3063      | 0.248266667  | -0.4268      | -0.1237      |
| LOC644860    | -0.099966667 | 0.0325       | -0.3065      | 0.074433333  | -0.035433333 |
| FAR2         | -0.103066667 | 0.124        | 0.178        | -0.140766667 | 0.2619       |
| LOC645466    | -0.081733333 | 0.131066667  | -0.128733333 | 0.113133333  | 0.135966667  |
| NOL7         | 0.071133333  | -0.0699      | 0.0192       | 0.1651       | 0.127566667  |
| MTA3         | -0.348933333 | -0.0311      | -0.000633333 | -0.128033333 | -0.0734      |
| VGLL2        | 0.388866667  | 0.139033333  | -0.212666667 | 0.6191       | 0.118666667  |
| NARFL        | -0.098266667 | 0.0303       | -0.1654      | -0.081333333 | 0.005466667  |
| RBKS         | -0.208866667 | -0.256733333 | -0.044933333 | -0.062466667 | -0.0483      |
| LOC100129362 | 0.000666667  | 0.447133333  | -0.025166667 | 0.037866667  | 0.4108       |

|              |              |              |              |              |              |
|--------------|--------------|--------------|--------------|--------------|--------------|
| HARBI1       | -0.000566667 | -0.3415      | -0.035566667 | 0.046133333  | 0.0419       |
| RPL41        | -0.0501      | -0.007966667 | -0.182133333 | 0.010233333  | 0.0667       |
| ZNF699       | -0.028233333 | -0.021433333 | -0.0676      | 0.0229       | 0.110766667  |
| NFE2L2       | -0.1784      | -0.089366667 | -0.1193      | 0.080666667  | -0.051233333 |
| CDC26        | -0.164633333 | 0.010233333  | -0.114033333 | -0.132666667 | 0.069966667  |
| HECA         | -0.012033333 | -0.004233333 | -0.153866667 | 0.1395       | -0.026966667 |
| GEMIN6       | 0.178066667  | 0.059466667  | -0.128066667 | 0.152        | 0.112866667  |
| ARMET        | -0.095666667 | -0.063833333 | 0.2549       | -0.032       | 0.1908       |
| LOC441711    | 0.150033333  | -0.167233333 | 0.0981       | 0.129633333  | 0.042033333  |
| PABPC1L      | -0.559166667 | -0.303233333 | -0.160533333 | -0.577933333 | -0.207366667 |
| WDR42A       | -0.2913      | 0.011466667  | 0.0873       | -0.025433333 | -0.000966667 |
| STRADA       | -0.140166667 | -0.017733333 | -0.0961      | -0.1215      | 0.0472       |
| TXNL4B       | 0.184        | -0.129066667 | -0.250733333 | 0.128833333  | -0.148533333 |
| ETNK1        | 0.196933333  | -0.031466667 | -0.098933333 | 0.378166667  | -0.083466667 |
| C8orf76      | 0.0557       | -0.072333333 | -0.041066667 | 0.134566667  | 0.034733333  |
| ZNF337       | 0.014833333  | -0.189266667 | 0.016833333  | -0.0676      | -0.017966667 |
| MIR1185-1    | -0.029633333 | -0.1306      | 0.058166667  | 0.041133333  | -0.009466667 |
| MRPS24       | -0.0665      | -0.0847      | -0.0562      | -0.027033333 | 0.048933333  |
| MED13        | -0.058833333 | 0.050033333  | -0.014766667 | 0.150333333  | 0.0454       |
| KIAA1715     | 0.001033333  | -0.182       | -0.053266667 | 0.090466667  | -0.086566667 |
| APBB3        | -0.212466667 | -0.248466667 | 0.046133333  | -0.245366667 | -0.089866667 |
| ACCN2        | -0.181233333 | -0.097266667 | 0.016        | -0.089866667 | 0.110533333  |
| PTPRE        | 0.005966667  | -0.039966667 | -0.0635      | 0.181433333  | -0.018466667 |
| LOC387647    | -0.1083      | -0.062333333 | -0.076533333 | -0.016566667 | 0.060866667  |
| ZDHHC3       | -0.033466667 | 0.203        | -0.1319      | 0.202133333  | 0.072033333  |
| BAIAP2L2     | 0.3023       | 0.072933333  | -0.082       | 0.2987       | 0.126166667  |
| FAM49B       | -0.0259      | 0.0784       | -0.153733333 | 0.083933333  | 0.126633333  |
| KIAA0174     | -0.155633333 | 0.136533333  | -0.027133333 | -0.020833333 | 0.051833333  |
| USP14        | 0.029533333  | -0.021233333 | -0.128733333 | 0.088333333  | 0.0771       |
| HMGA1        | 0.2526       | 0.033966667  | 0.193        | 0.0537       | 0.127066667  |
| KIF1C        | 0.030433333  | -0.003933333 | -0.118566667 | 0.165966667  | 0.067066667  |
| ZNF655       | 0.260866667  | 0.0314       | -0.205733333 | 0.312066667  | -0.008666667 |
| C2orf47      | 0.0137       | -0.029366667 | -0.074366667 | 0.104466667  | 0.1125       |
| NLN          | 0.074533333  | -0.007933333 | -0.231333333 | 0.1258       | 0.061833333  |
| LOC645094    | 0.084866667  | -0.169866667 | -0.119133333 | 0.0984       | -0.1097      |
| PRPF18       | -0.159233333 | 0.062333333  | -0.150866667 | 0.001466667  | 0.119333333  |
| LOC100128498 | 0.002833333  | -0.124933333 | -0.0876      | -0.077666667 | 0.124466667  |
| TSHZ3        | -0.049733333 | 0.008466667  | 0.083633333  | 0.149633333  | 0.110266667  |
| TAF13        | 0.1261       | 0.0454       | -0.053833333 | 0.198133333  | 0.150366667  |
| KIAA0556     | -0.185833333 | -0.0762      | -0.006833333 | -0.073066667 | -0.0201      |
| MRPL22       | 0.0499       | 0.044766667  | 0.034966667  | 0.0886       | 0.1682       |
| RAD1         | 0.163966667  | 0.037        | -0.1446      | 0.140566667  | 0.153266667  |
| LOC730417    | 0.115966667  | -0.121933333 | -0.250633333 | 0.095033333  | -0.0719      |
| LOC646630    | 0.079966667  | -0.161733333 | -0.097633333 | 0.031866667  | -0.010066667 |
| SARS         | -0.284566667 | -0.224       | -0.269366667 | -0.271633333 | -0.194433333 |
| RBBP5        | -0.1         | -0.0481      | 0.139933333  | 0.0217       | 0.1506       |
| MAPKSP1      | -0.084666667 | 0.026733333  | -0.1463      | -0.039566667 | 0.0033       |

|           |              |              |              |              |              |
|-----------|--------------|--------------|--------------|--------------|--------------|
| CDT1      | 0.252533333  | -0.141933333 | 0.004933333  | 0.229933333  | 0.0527       |
| SLC16A4   | -0.8369      | -0.22        | 0.118        | -0.628166667 | -0.104766667 |
| ASNA1     | -0.178733333 | -0.039733333 | -0.123733333 | 0.0703       | -0.026866667 |
| LOC647597 | 0.043733333  | -0.106733333 | 0.093033333  | 0.115066667  | 0.088133333  |
| ELAVL1    | 0.099533333  | -0.0079      | 0.003866667  | 0.034533333  | 0.0411       |
| PPARG     | -0.167966667 | 0.1193       | 0.1555       | -0.1915      | 0.304566667  |
| ZNF688    | -0.327933333 | -0.160466667 | -0.0611      | -0.273966667 | 0.049866667  |
| IL17RA    | -0.068133333 | -0.095733333 | -0.081533333 | -0.002133333 | -0.028766667 |
| MED22     | 0.152266667  | 0.070966667  | -0.141133333 | 0.1566       | 0.145133333  |
| PFDN2     | 0.0408       | -0.0179      | -0.045066667 | 0.101733333  | -0.011433333 |
| SFRS18    | 0.012766667  | -0.055833333 | -0.129933333 | 0.087433333  | -0.0514      |
| GNL3      | 0.5197       | 0.0623       | -0.078366667 | 0.535866667  | 0.0131       |
| C1GALT1C1 | -0.081533333 | -0.104233333 | 0.012766667  | -0.113033333 | 0.140233333  |
| EPPB9     | -0.377433333 | -0.325466667 | 0.1739       | -0.174266667 | -0.113433333 |
| LOC730246 | 0.0888       | -0.140766667 | -0.0212      | 0.114433333  | -0.003166667 |
| MMACHC    | -0.1305      | -0.070866667 | 0.0069       | -0.006366667 | 0.010766667  |
| DRG2      | -0.0462      | 0.0665       | -0.1285      | -0.0688      | 0.088533333  |
| UBE2Q1    | 0.0426       | -0.0144      | -0.167633333 | 0.052        | -0.007833333 |
| SH3GLB2   | -0.0697      | -0.135033333 | -0.0417      | -0.007466667 | 0.022266667  |
| LOC146517 | 0.1138       | -0.022466667 | -0.141533333 | 0.2633       | -0.018266667 |
| CHRN1     | -0.303166667 | -0.083266667 | -0.058833333 | 0.148933333  | -0.0718      |
| LOC645895 | 0.017333333  | 0.1412       | 0.033566667  | -0.039133333 | 0.175166667  |
| LOC729970 | 0.006633333  | -0.0347      | 0.039666667  | 0.125466667  | 0.1666       |
| GREB1     | -0.020933333 | -0.0668      | -0.032133333 | 0.064966667  | 0.0155       |
| SMARCD3   | -0.3553      | -0.157       | 0.0676       | -0.146366667 | -0.0822      |
| FAM161A   | -0.1025      | -0.007333333 | 0.009366667  | -0.0132      | 0.138566667  |
| ZNF480    | 0.067566667  | -0.003333333 | -0.137866667 | 0.0597       | 0.199566667  |
| MGC3032   | 0.201466667  | -0.033033333 | 0.089233333  | 0.304133333  | 0.050133333  |
| LOC647474 | -0.082166667 | 0.1037       | -0.084633333 | 0.0715       | 0.022533333  |
| SLC38A6   | -0.381433333 | -0.1118      | 0.067866667  | -0.231966667 | 0.073166667  |
| VAC14     | -0.023966667 | -0.207833333 | -0.0437      | -0.0222      | -0.031666667 |
| ANKRD22   | 0.0311       | -0.0297      | -0.047666667 | -0.023966667 | 0.0319       |
| AKR1C3    | -0.877833333 | -0.1078      | 0.153866667  | -0.6173      | -0.0706      |
| LOC641788 | -0.134966667 | 0.153633333  | -0.006033333 | -0.008366667 | 0.187266667  |
| CSNK1D    | -0.020766667 | -0.0512      | 0.069133333  | 0.0747       | -0.0376      |
| SERF1A    | -0.0179      | 0.046966667  | -0.0879      | 0.076        | 0.0438       |
| UTX       | 0.047633333  | -0.036866667 | -0.062566667 | 0.1488       | 0.045        |
| EID2B     | 0.034566667  | 0.4101       | -0.086966667 | 0.076766667  | 0.283133333  |
| TRAF6     | -0.0366      | 0.059633333  | -0.0119      | 0.145466667  | -0.100066667 |
| TDRD3     | -0.1261      | 0.119933333  | -0.129833333 | -0.0517      | 0.1046       |
| MAP3K6    | 0.071966667  | -0.1145      | -0.013733333 | -0.042533333 | 0.1215       |
| YDJC      | 0.054033333  | -0.0576      | -0.146166667 | 0.066533333  | 0.002433333  |
| C10orf84  | 0.091966667  | -0.0108      | -0.061466667 | 0.0931       | 0.1024       |
| GPX3      | -0.2903      | -0.116933333 | -0.001366667 | -0.0735      | 0.010233333  |
| SLAIN2    | -0.203433333 | 0.032366667  | 0.183333333  | 0.0361       | 0.1491       |
| SFRS6     | 0.208166667  | 0.0404       | -0.2137      | 0.2032       | 0.138833333  |
| NUP85     | 0.4088       | -0.022633333 | -0.1098      | 0.361566667  | 0.026766667  |

|           |              |              |              |              |              |
|-----------|--------------|--------------|--------------|--------------|--------------|
| TTC5      | -0.098033333 | 0.0386       | -0.1033      | -0.0712      | 0.104966667  |
| POLR3F    | 0.2222       | 0.028566667  | -0.222033333 | 0.1443       | 0.110033333  |
| TNIP2     | 0.0173       | 0.030933333  | -0.0849      | 0.215733333  | -0.019966667 |
| LOC388720 | 0.0899       | -0.126033333 | -0.109766667 | -0.0095      | 0.044266667  |
| AP3M2     | 0.102766667  | -0.067066667 | -0.226266667 | 0.1276       | -0.044       |
| NAE1      | 0.061733333  | 0.177433333  | -0.149566667 | 0.035066667  | 0.234933333  |
| KCTD6     | 0.1132       | 0.014833333  | -0.044833333 | 0.061666667  | 0.081733333  |
| UCK2      | 0.476266667  | 0.116466667  | -0.078       | 0.461133333  | 0.0839       |
| IL16      | -0.038933333 | 0.1081       | -0.072333333 | 0.097766667  | -0.038566667 |
| RPA2      | 0.291733333  | -0.008133333 | -0.165066667 | 0.122466667  | 0.084366667  |
| CYC1      | -0.111866667 | -0.1356      | -0.009933333 | -0.030033333 | -0.008866667 |
| SPAG5     | 0.130533333  | 0.175633333  | -0.126366667 | 0.223233333  | 0.123466667  |
| ADM2      | -0.240366667 | -0.2692      | -0.013333333 | -0.165433333 | -0.076266667 |
| EBP       | 0.2463       | 0.0744       | -0.2588      | 0.197333333  | 0.0534       |
| CHUK      | 0.242866667  | 0.090166667  | -0.2957      | 0.1659       | 0.030066667  |
| C12orf10  | -0.025966667 | -0.229566667 | -0.030866667 | -0.020133333 | -0.025733333 |
| LINS1     | 0.044933333  | 0.054233333  | -0.102233333 | 0.081866667  | 0.209933333  |
| SF3A2     | 0.193533333  | -0.0516      | -0.016066667 | 0.181633333  | 0.0304       |
| KIAA0753  | -0.078066667 | -0.1028      | -0.059833333 | 0.036466667  | -0.008466667 |
| LOC654121 | 0.105233333  | 0.030466667  | -0.0972      | 0.056933333  | 0.127766667  |
| CPNE8     | -0.222633333 | 0.0056       | 0.006733333  | -0.071       | 0.101833333  |
| PCDH17    | -0.160866667 | -0.249466667 | 0.0108       | -0.1836      | 0.050833333  |
| GPR19     | 0.076566667  | 0.052466667  | -0.1264      | -0.037766667 | 0.144033333  |
| SLC35C2   | 0.032066667  | -0.064866667 | -0.181466667 | 0.115966667  | -0.131966667 |
| FTHL8     | -0.4871      | 0.0358       | -0.3885      | -0.3436      | 0.085166667  |
| DNTTIP2   | 0.009766667  | 0.2356       | -0.2464      | 0.1068       | 0.142066667  |
| DNAJC3    | 0.129066667  | -0.058866667 | 0.0598       | 0.217933333  | 0.121833333  |
| LOC653314 | 0.063766667  | -0.156866667 | -0.0081      | 0.079966667  | -0.055       |
| UBE2W     | -0.079133333 | -0.055633333 | -0.023933333 | -0.1454      | 0.095333333  |
| BDNF      | 0.138133333  | -0.0863      | 0.137733333  | 0.2432       | 0.0401       |
| AKR1D1    | -0.0164      | 0.4728       | -0.162933333 | -0.0228      | 0.3316       |
| SYPL1     | 0.0706       | -0.109233333 | 0.146533333  | 0.032933333  | 0.102566667  |
| C12orf41  | 0.100866667  | -0.1723      | -0.177066667 | 0.143833333  | -0.108633333 |
| FLJ38482  | -0.056466667 | -0.1173      | -0.245333333 | -0.005433333 | -0.055966667 |
| MRPL2     | 0.032066667  | -0.057266667 | -0.097566667 | 0.197766667  | -0.0772      |
| LOC644816 | -0.103033333 | 0.082033333  | -0.253533333 | -0.0999      | 0.1904       |
| ARF1      | 0.1179       | -0.061133333 | -0.023433333 | 0.2293       | -0.0339      |
| LOC401127 | 0.1392       | 0.0504       | -0.123733333 | 0.2658       | 0.077733333  |
| FLJ36070  | -0.0437      | -0.0573      | -0.000733333 | -0.092266667 | 0.102833333  |
| UBR7      | 0.134333333  | -0.0665      | 0.018466667  | 0.1345       | -0.0337      |
| COIL      | 0.1359       | 0.0812       | -0.2057      | 0.175033333  | 0.066233333  |
| SLC2A4RG  | 0.105833333  | 0.031866667  | -0.078366667 | 0.008166667  | 0.108966667  |
| NARF      | 0.1075       | -0.114866667 | 0.091933333  | 0.0234       | 0.1634       |
| BRPF1     | 0.173433333  | 0.113133333  | -0.1236      | 0.304333333  | 0.033        |
| CRSP9     | -0.244866667 | 0.003466667  | -0.150566667 | -0.068933333 | 0.076566667  |
| RNF5      | -0.130333333 | -0.1043      | 0.071233333  | 0.055966667  | 0.013266667  |
| BIRC2     | 0.025933333  | -0.047933333 | -0.0708      | 0.126266667  | 0.060833333  |

|              |              |              |              |              |              |
|--------------|--------------|--------------|--------------|--------------|--------------|
| CDK4         | -0.007533333 | 0.0032       | -0.0677      | 0.088366667  | 0.001066667  |
| LOC644242    | -0.0204      | 0.131933333  | 0.190266667  | -0.056933333 | 0.261        |
| LOC100132901 | 0.027        | 0.0176       | -0.2159      | 0.112866667  | -0.124366667 |
| LOC653232    | -0.3738      | -0.069566667 | -0.0547      | -0.0792      | 0.068866667  |
| CLN3         | -0.130933333 | -0.137666667 | -0.041133333 | -0.0617      | -0.0249      |
| LOC100134159 | -0.118633333 | 0.4461       | -0.200466667 | 0.036933333  | 0.274733333  |
| STX10        | -0.000633333 | -0.032366667 | 0.017066667  | -0.0748      | 0.078366667  |
| GALNT4       | -0.0046      | -0.089266667 | -0.011833333 | 0.0399       | 0.094433333  |
| NUCB2        | -0.444866667 | -0.097033333 | 0.004633333  | -0.187866667 | -0.064566667 |
| KTELC1       | -0.128166667 | -0.050133333 | 0.004966667  | 0.025666667  | 0.064033333  |
| SEC61G       | 0.155066667  | -0.187233333 | -0.022233333 | 0.0769       | 0.108733333  |
| CCDC55       | -0.029       | 0.119433333  | -0.030733333 | 0.166633333  | 0.0246       |
| FAM162A      | -0.384633333 | 0.130466667  | -0.045266667 | -0.213866667 | 0.127833333  |
| DECR1        | -0.415533333 | -0.2991      | 0.209233333  | -0.2826      | -0.072233333 |
| DDX55        | 0.101066667  | 0.0624       | -0.016133333 | 0.171433333  | 0.060866667  |
| SNX21        | -0.183433333 | -0.2253      | -0.1885      | -0.059666667 | -0.204233333 |
| ACAD11       | -0.355       | -0.233466667 | 0.119966667  | -0.126633333 | -0.064133333 |
| PPIG         | -0.0286      | 0.0938       | -0.137466667 | 0.0707       | 0.121633333  |
| LOC648758    | 0.140466667  | 0.051166667  | -0.089966667 | 0.1795       | 0.027833333  |
| MYO6         | 0.024666667  | -0.090466667 | -0.073733333 | -0.030766667 | 0.048433333  |
| CHEK1        | 0.1871       | 0.068666667  | -0.061366667 | 0.2016       | 0.085866667  |
| ZNF707       | 0.0869       | -0.126233333 | -0.0986      | 0.268233333  | -0.005333333 |
| CCDC126      | -0.0047      | -0.282666667 | -0.115733333 | -0.030166667 | -0.0165      |
| LOC100127982 | -0.1667      | 0.2205       | -0.113466667 | 0.1653       | -0.107033333 |
| CYLD         | -0.300466667 | -0.033166667 | 0.015833333  | -0.100633333 | -0.0096      |
| FAM136B      | 0.007433333  | 0.0417       | -0.179466667 | 0.052733333  | 0.042933333  |
| LSM10        | 0.186333333  | -0.023766667 | -0.105033333 | 0.145766667  | 0.074        |
| PMPCB        | -0.000433333 | -0.077266667 | -0.0265      | -0.045366667 | 0.053666667  |
| GOLSYN       | 0.029033333  | -0.322433333 | -0.267033333 | 0.0409       | -0.219733333 |
| CNOT2        | -0.006833333 | 0.0491       | -0.022266667 | 0.1468       | 0.018833333  |
| ZNF277       | -0.429533333 | -0.089       | 0.1101       | -0.284866667 | -0.016033333 |
| VDR          | 0.122933333  | -0.012666667 | 0.282866667  | 0.224366667  | 0.184333333  |
| LOC654191    | -0.145333333 | -0.036666667 | -0.091533333 | -0.062666667 | 0.126566667  |
| DHX36        | 0.036533333  | 0.074566667  | -0.140733333 | 0.223433333  | -0.063166667 |
| GOLGA2       | -0.0604      | -0.059933333 | 0.075466667  | 0.1357       | -0.0081      |
| NUP43        | 0.011433333  | 0.141733333  | -0.149666667 | 0.013633333  | 0.116133333  |
| C1QBP        | 0.027966667  | 0.119166667  | 0.0339       | 0.169266667  | 0.129033333  |
| OSBPL3       | 0.125066667  | -0.0766      | 0.043133333  | 0.1836       | 0.0292       |
| DCUN1D4      | -0.0051      | -0.0445      | -0.0387      | 0.013533333  | 0.029766667  |
| DCTPP1       | 0.2921       | -0.053       | -0.068466667 | 0.228566667  | 0.099633333  |
| NME7         | -0.4141      | 0.0869       | -0.171733333 | -0.2997      | 0.1055       |
| LAMP3        | -0.062133333 | 0.003866667  | -0.090633333 | 0.006666667  | -0.003966667 |
| MKNK1        | -0.074466667 | -0.0302      | -0.072533333 | -0.015766667 | -0.040366667 |
| MAGEF1       | 0.087866667  | -0.0324      | 0.048666667  | 0.151466667  | 0.120566667  |
| MED20        | -0.0166      | -0.041833333 | -0.235333333 | 0.017733333  | 0.091433333  |
| RNF25        | 0.074466667  | -0.109833333 | -0.133466667 | 0.080866667  | -0.0434      |
| ITIH5        | -0.033066667 | -0.041166667 | 0.040333333  | -0.0275      | 0.092366667  |



|              |              |              |              |              |              |
|--------------|--------------|--------------|--------------|--------------|--------------|
| ZNF34        | -0.143266667 | -0.088166667 | -0.108933333 | -0.025266667 | -0.0807      |
| KIAA0922     | 0.218666667  | -0.0309      | -0.1207      | 0.141266667  | 0.099        |
| RN7SL1       | -0.0925      | -0.155133333 | -0.025233333 | 0.020833333  | -0.053966667 |
| GSG2         | 0.3156       | 0.143066667  | -0.194366667 | 0.279566667  | 0.031366667  |
| COMTD1       | 0.1124       | -0.101066667 | 0.056566667  | 0.122433333  | 0.096633333  |
| PRKRIR       | 0.103333333  | 0.0535       | -0.0807      | 0.2614       | 0.007833333  |
| MRPL14       | 0.148466667  | -0.007333333 | 0.075033333  | 0.1933       | 0.147466667  |
| GMPR2        | -0.283966667 | -0.1029      | 0.136466667  | -0.140633333 | 0.017633333  |
| FLJ20628     | -0.2344      | 0.009133333  | -0.034266667 | -0.070633333 | 0.106366667  |
| SIVA         | 0.345966667  | -0.1489      | 0.084233333  | 0.3412       | 0.114066667  |
| C22orf27     | -0.100033333 | -0.017633333 | 0.2374       | 0.089266667  | 0.2469       |
| ZNF791       | -0.1906      | -0.107366667 | -0.031933333 | -0.055233333 | 0.068333333  |
| FNBP4        | 0.1449       | 0.0443       | -0.1108      | 0.234466667  | -0.054866667 |
| WDR36        | 0.130033333  | 0.059966667  | -0.140933333 | 0.206566667  | -0.066733333 |
| AKAP1        | -0.037966667 | -0.054433333 | 0.0167       | 0.1339       | 0.1102       |
| CSNK1G2      | -0.008766667 | -0.0728      | 0.077066667  | -0.039433333 | 0.117066667  |
| LOC648605    | 0.1253       | 0.028266667  | -0.0014      | 0.2347       | 0.046333333  |
| FBXO32       | -0.4784      | -0.155933333 | 0.1229       | -0.279366667 | 0.057866667  |
| PSMC3        | 0.189333333  | 0.0512       | -0.180733333 | 0.149933333  | 0.061        |
| ABLIM3       | -0.0927      | -0.102966667 | -0.0256      | -0.0101      | -0.028033333 |
| SASH1        | -0.366866667 | -0.043833333 | -0.019466667 | -0.243133333 | 0.046166667  |
| GSS          | -0.105833333 | -0.274433333 | 0.117366667  | -0.063066667 | -0.0507      |
| TSEN54       | 0.254333333  | -0.163366667 | 0.005166667  | 0.2968       | 0.031733333  |
| SNRPB        | 0.0902       | -0.049433333 | 0.001566667  | 0.191666667  | 0.070533333  |
| EBF3         | -0.005933333 | -0.092533333 | 0.025266667  | 0.0819       | -0.006233333 |
| FAM127C      | -0.223       | -0.1599      | 0.133866667  | -0.054666667 | -0.0027      |
| KAZALD1      | -0.2773      | -0.111366667 | 0.0325       | -0.026833333 | -0.0307      |
| CECR5        | 0.189033333  | 0.026666667  | -0.113533333 | 0.1583       | 0.128033333  |
| LIPT1        | 0.078966667  | -0.159166667 | -0.1166      | 0.0247       | 0.089        |
| LOC648729    | -0.0497      | -0.039333333 | -0.062633333 | 0.034233333  | 0.038566667  |
| MAD2L1       | 0.1837       | -0.000866667 | -0.043333333 | 0.3297       | -0.0841      |
| LOC100131621 | -0.0599      | -0.073466667 | -0.032166667 | 0.003466667  | 0.017733333  |
| EIF2AK3      | -0.162233333 | -0.155833333 | 0.056033333  | -0.0595      | 0.048166667  |
| LOC440348    | -0.018666667 | -0.062733333 | -0.1808      | 0.057333333  | -0.023966667 |
| RELA         | 0.0808       | -0.056666667 | -0.0235      | 0.097333333  | 0.021233333  |
| CHD1         | 0.0452       | -0.022933333 | 0.038033333  | 0.179633333  | 0.1372       |
| DZIP1L       | 0.008166667  | 0.0916       | -0.034333333 | 0.118833333  | 0.1742       |
| CLN8         | 0.056466667  | -0.017333333 | -0.1203      | 0.097833333  | 0.060133333  |
| PHLDB2       | -0.171566667 | -0.134866667 | 0.195266667  | -0.015033333 | 0.188166667  |
| KRT80        | 0.336833333  | -0.109533333 | -0.204533333 | 0.118733333  | 0.019        |
| TUG1         | -0.245566667 | -0.142033333 | 0.073033333  | -0.073133333 | -0.096966667 |
| NR2C2        | 0.171766667  | -0.0451      | -0.042133333 | 0.048966667  | 0.112866667  |
| SV2A         | -0.3409      | -0.069366667 | -0.120333333 | -0.176266667 | -0.009833333 |
| HECTD3       | -0.170233333 | -0.095       | -0.047833333 | -0.08        | 0.0842       |
| CCDC12       | 0.1005       | 0.062133333  | -0.073233333 | 0.1862       | 0.045566667  |
| NEK11        | -0.163133333 | -0.117933333 | -0.114066667 | -0.134266667 | 0.0346       |
| MED24        | -0.0784      | 0.0437       | -0.064066667 | -0.004633333 | 0.007066667  |

|              |              |              |              |              |              |
|--------------|--------------|--------------|--------------|--------------|--------------|
| LOC90624     | -0.226833333 | 0.0032       | -0.0212      | -0.087266667 | 0.1151       |
| SMPD4        | 0.118        | -0.215966667 | -0.068566667 | 0.187066667  | -0.045266667 |
| CSAG3A       | -0.153033333 | -0.1864      | -0.1013      | -0.097633333 | -0.0758      |
| PVR          | 0.191133333  | -0.060866667 | -0.223       | 0.141033333  | -0.151766667 |
| INTS1        | -0.242933333 | -0.090233333 | 0.0321       | -0.001566667 | -0.130933333 |
| EIF3E        | -0.0031      | -0.058066667 | 0.009966667  | 0.069633333  | 0.027866667  |
| C14orf11     | -0.2362      | 0.0648       | -0.2048      | -0.111766667 | 0.002533333  |
| BCL2L2       | 0.135066667  | -0.213266667 | -0.178566667 | 0.1741       | -0.089266667 |
| LOC645304    | 0.018666667  | 0.353466667  | -0.231666667 | -0.0567      | 0.3564       |
| NOP56        | 0.343266667  | 0.1798       | -0.342933333 | 0.144733333  | 0.220866667  |
| KHDRBS1      | -0.045766667 | -0.086966667 | 0.0193       | 0.0551       | 0.0764       |
| ASNSD1       | 0.158466667  | -0.0026      | -0.206466667 | 0.227933333  | 0.001333333  |
| LOC642280    | -0.0358      | -0.185266667 | -0.133966667 | -0.028433333 | -0.0051      |
| TTC4         | 0.219833333  | 0.0223       | -0.3014      | 0.1555       | 0.089        |
| SEPX1        | -0.425533333 | -0.0768      | -0.017       | -0.229666667 | -0.025866667 |
| LOC651919    | -0.235133333 | 0.1671       | -0.123833333 | 0.054833333  | 0.049633333  |
| ETNK2        | -0.116266667 | -0.092666667 | -0.000566667 | 0.010133333  | -0.045533333 |
| LONP1        | -0.157566667 | -0.122366667 | -0.064333333 | -0.0661      | -0.028966667 |
| MUTYH        | -0.109833333 | -0.068133333 | -0.080466667 | -0.120566667 | 0.109833333  |
| ZNF14        | -0.1126      | 0.625966667  | -0.124033333 | -0.011       | 0.3714       |
| LOC644131    | -0.1447      | 0.3739       | -0.076833333 | 0.116866667  | 0.256333333  |
| PRR7         | -0.3102      | -0.0385      | 0.101466667  | -0.149266667 | -0.015933333 |
| LOC440900    | 0.0309       | 0.0249       | -0.049533333 | 0.051833333  | 0.036466667  |
| GLYCTK       | 0.113133333  | -0.1093      | 0.0425       | 0.1131       | 0.0343       |
| LOC647834    | -0.3446      | 0.122233333  | -0.2242      | -0.0576      | -0.038533333 |
| COL16A1      | -0.169533333 | 0.0597       | -0.107666667 | -0.156466667 | 0.0364       |
| PRPS2        | 0.246533333  | -0.045933333 | -0.010566667 | 0.233366667  | 0.0012       |
| PEX14        | -0.150366667 | -0.025066667 | 0.080866667  | -0.1599      | 0.053833333  |
| C12orf43     | 0.155266667  | 0.023733333  | -0.192766667 | 0.2447       | 0.100566667  |
| CHMP6        | -0.17        | 0.046533333  | -0.055466667 | 0.115933333  | -0.035233333 |
| LOC100129144 | 0.0368       | 0.036533333  | -0.063066667 | 0.138        | 0.029233333  |
| HOXB6        | 0.105033333  | -0.0754      | -0.028966667 | 0.205        | -0.013633333 |
| GCLC         | -0.0328      | -0.208133333 | -0.2682      | -0.0334      | 0.026266667  |
| TRQ1         | 0.227766667  | 0.174366667  | -0.076866667 | 0.074466667  | 0.2681       |
| LOC100128765 | -0.109466667 | 0.054        | -0.0928      | -0.009366667 | 0.046933333  |
| SWAP70       | 0.357833333  | -0.163733333 | -0.045233333 | 0.326566667  | 0.114        |
| USP15        | 0.080033333  | -0.0327      | -0.0064      | 0.148866667  | 0.179766667  |
| USP46        | -0.0015      | -0.160733333 | 0.103566667  | 0.102666667  | -0.031066667 |
| PIAS2        | 0.243366667  | 0.0388       | -0.0674      | 0.243166667  | 0.021166667  |
| MRRF         | -0.0631      | 0.208633333  | -0.209933333 | 0.053433333  | 0.006333333  |
| KLRAQ1       | -0.530833333 | -0.2522      | 0.185866667  | -0.2429      | -0.099933333 |
| ORMDL3       | 0.0933       | -0.059366667 | 0.0125       | 0.042666667  | -0.006233333 |
| PRR14        | -0.135966667 | -0.0401      | -0.0571      | -0.0741      | 0.084666667  |
| CITED2       | -0.171833333 | -0.1481      | -0.6089      | -0.1318      | -0.029433333 |
| CD164        | -0.1947      | -0.2921      | -0.101566667 | -0.082433333 | -0.052033333 |
| SLC46A3      | -0.1368      | -0.1027      | 0.018933333  | -0.033366667 | 0.0234       |
| NUDC         | 0.0213       | -0.012333333 | -0.0073      | 0.053966667  | 0.084033333  |

|              |              |              |              |              |              |
|--------------|--------------|--------------|--------------|--------------|--------------|
| TMEM77       | -0.239966667 | 0.004133333  | -0.0708      | -0.0806      | -0.007       |
| KRTAP10-11   | 0.049233333  | -0.000266667 | -0.050666667 | -0.047033333 | 0.086666667  |
| SLC27A1      | -0.268466667 | -0.049966667 | 0.3523       | -0.052766667 | -0.084066667 |
| TMEM192      | -0.015266667 | -0.080733333 | -0.102633333 | 0.095633333  | -0.014066667 |
| HERPUD2      | -0.224633333 | -0.0722      | -0.204633333 | -0.0092      | -0.070166667 |
| SCP2         | -0.173333333 | -0.144233333 | 0.0324       | -0.0244      | -0.0809      |
| ATAD3B       | 0.3253       | -0.046566667 | -0.0982      | 0.187566667  | 0.0958       |
| GNB1         | 0.2264       | -0.0943      | -0.104933333 | 0.174066667  | 0.0857       |
| LOC642460    | -0.0322      | -0.0158      | 0.011233333  | 0.038666667  | 0.106433333  |
| TOM1L2       | -0.0453      | 0.1042       | -0.109666667 | 0.008866667  | 0.167766667  |
| LOC399881    | -0.219533333 | 0.182366667  | -0.324933333 | -0.100066667 | 0.136233333  |
| LOC653877    | -0.027333333 | 0.027533333  | 0.096833333  | 0.170166667  | 0.198633333  |
| CCDC90B      | -0.4732      | -0.0602      | -0.015066667 | -0.1973      | -0.0502      |
| HEXB         | -0.0339      | -0.156366667 | -0.097933333 | -0.0975      | 0.011033333  |
| NT5DC3       | -0.040466667 | -0.261566667 | -0.0366      | 0.043233333  | -0.1807      |
| LOC647081    | -0.125133333 | -0.1179      | -0.056666667 | -0.045866667 | 0.061366667  |
| PLAGL1       | -0.031833333 | -0.086933333 | -0.023533333 | -0.004666667 | 0.0213       |
| KLC4         | 0.086233333  | 0.0741       | -0.080933333 | 0.2491       | 0.080233333  |
| ARHGAP23     | 0.269033333  | 0.0643       | 0.009033333  | 0.402233333  | 0.1214       |
| LOC731096    | -0.218566667 | -0.2115      | 0.119733333  | -0.0599      | -0.040066667 |
| C6orf145     | 0.2339       | 0.001066667  | -0.078633333 | 0.286766667  | -0.016766667 |
| DPAGT1       | 0.112866667  | 0.014033333  | -0.055433333 | 0.098166667  | 0.1249       |
| PHF6         | -0.098733333 | 0.012666667  | 0.130966667  | 0.053166667  | 0.085033333  |
| SCFD1        | -0.347533333 | -0.104666667 | 0.0847       | -0.146633333 | -0.011333333 |
| PHF5A        | 0.286866667  | 0.1268       | -0.199933333 | 0.2734       | 0.1363       |
| IL6          | -0.035266667 | -0.277666667 | -0.094266667 | 0.1382       | -0.030566667 |
| P4HA1        | -0.189366667 | -0.3172      | 0.401133333  | -0.118166667 | 0.168233333  |
| PTTG1IP      | 0.272433333  | 0.063166667  | -0.155333333 | 0.3057       | 0.0008       |
| TMEFF1       | -0.0348      | -0.008566667 | -0.006766667 | 0.012166667  | 0.120066667  |
| PHLPP2       | 0.078766667  | 0.0016       | -0.008666667 | 0.236066667  | 0.021433333  |
| METAP2       | 0.056866667  | -0.1927      | 0.1077       | 0.0627       | 0.003566667  |
| UHRF1BP1     | -0.234366667 | -0.1012      | -0.123166667 | -0.1302      | -0.069466667 |
| ANAPC11      | -0.3301      | -0.1481      | 0.045733333  | -0.141433333 | -0.073633333 |
| PRIM1        | 0.309966667  | 0.0085       | -0.142033333 | 0.268733333  | 0.065566667  |
| C14orf2      | -0.055466667 | -0.058233333 | -0.281866667 | 0.008766667  | 0.022466667  |
| C7orf63      | -0.126866667 | -0.108133333 | -0.053533333 | -0.049433333 | -0.005233333 |
| LOC645058    | -0.0098      | -0.0691      | 0.021433333  | -0.071333333 | 0.1175       |
| SCD5         | -0.023       | -0.0186      | -0.0947      | -0.062266667 | 0.052966667  |
| PDXK         | 0.150733333  | -0.0532      | -0.200066667 | 0.1072       | -0.0052      |
| LOC100130229 | 0.002866667  | 0.068566667  | -0.0706      | 0.061466667  | 0.1612       |
| LOC650518    | -0.005766667 | -0.111633333 | -0.149533333 | -0.030933333 | 0.005266667  |
| GOLGA4       | -0.1967      | 0.0573       | 0.177433333  | 0.045066667  | 0.1072       |
| LSM6         | 0.112566667  | 0.3258       | -0.102766667 | 0.179633333  | 0.2624       |
| CCDC66       | -0.0027      | 0.084866667  | -0.076633333 | 0.2078       | 0.0623       |
| SORT1        | -0.007033333 | 0.031466667  | -0.165233333 | 0.013833333  | 0.062466667  |
| CD2AP        | 0.078733333  | -0.173133333 | -0.060833333 | 0.111133333  | 0.071933333  |
| SCARB2       | -0.305733333 | -0.205233333 | 0.223333333  | -0.072966667 | -0.0925      |

|              |              |              |              |              |              |
|--------------|--------------|--------------|--------------|--------------|--------------|
| KIAA1688     | 0.259333333  | -0.000266667 | -0.179633333 | 0.203566667  | 0.0476       |
| MTMR1        | 0.006066667  | -0.031933333 | 0.0305       | 0.0536       | 0.0992       |
| C1orf31      | -0.064133333 | 0.0809       | -0.072933333 | 0.1101       | 0.1545       |
| NUP153       | 0.349166667  | 0.0833       | -0.094733333 | 0.292866667  | 0.074733333  |
| STAT1        | -0.178866667 | -0.115333333 | -0.112933333 | -0.0342      | 0.0525       |
| ZDHHC2       | -0.233366667 | -0.287633333 | -0.079233333 | -0.107433333 | -0.0323      |
| LOC643011    | -0.315466667 | 0.1848       | -0.200133333 | -0.024333333 | 0.0167       |
| HIST2H4B     | -0.033833333 | -0.157566667 | -0.007566667 | 0.003733333  | 0.069433333  |
| ZNF650       | 0.0943       | -0.138333333 | -0.073933333 | 0.039133333  | -0.067733333 |
| LOC391656    | -0.116166667 | 0.010766667  | -0.108233333 | 0.012033333  | -0.020566667 |
| SNRK         | 0.195966667  | -0.116933333 | -0.088433333 | 0.061266667  | 0.126333333  |
| LOC401650    | -0.165033333 | -0.0013      | 0.117466667  | 0.0946       | 0.0352       |
| HK1          | -0.087033333 | -0.067533333 | 0.163166667  | -0.056766667 | 0.088933333  |
| SLC25A14     | 0.2303       | -0.121433333 | -0.028433333 | 0.0725       | 0.000133333  |
| CXorf57      | -0.038433333 | -0.056866667 | -0.254533333 | -0.0861      | -0.120066667 |
| NBPF11       | 0.1108       | -0.068166667 | -0.004266667 | 0.1404       | -0.179       |
| LOC339799    | -0.0461      | -0.004533333 | -0.143666667 | -0.0364      | 0.042866667  |
| DHX38        | 0.018        | 0.1736       | -0.110666667 | 0.010666667  | 0.071633333  |
| DNAJB4       | -0.044433333 | -0.1808      | -0.1197      | -0.190933333 | 0.095966667  |
| SNORA67      | 0.1304       | 0.0078       | -0.069033333 | 0.0816       | 0.141033333  |
| LOC648931    | -0.1443      | -0.0806      | 0.035833333  | -0.124766667 | 0.107066667  |
| DOLPP1       | 0.1308       | 0.054866667  | -0.083833333 | 0.216366667  | 0.0568       |
| LOC100130332 | 0.0056       | 0.142366667  | -0.456533333 | -0.104766667 | 0.2413       |
| MRPL18       | 0.215566667  | 0.026066667  | -0.0944      | 0.152733333  | 0.158033333  |
| NOTUM        | -0.067666667 | -0.053       | 0.1395       | 0.0706       | 0.011966667  |
| CYB5R4       | 0.000566667  | 0.033        | -0.214933333 | 0.0974       | 0.033566667  |
| LOC730291    | -0.2845      | 0.101833333  | -0.162866667 | -0.0945      | 0.033433333  |
| RWDD1        | -0.0346      | 0.043433333  | -0.021166667 | 0.0866       | 0.069833333  |
| PMS2CL       | -0.0674      | -0.0528      | -0.0351      | 0.0759       | -0.014233333 |
| C4orf41      | -0.399566667 | -0.176633333 | -0.0613      | -0.338766667 | -0.076466667 |
| ARF6         | 0.143766667  | -0.078833333 | -0.112766667 | 0.1669       | -0.0195      |
| LOC729992    | -0.107166667 | -0.157633333 | 0.1569       | 0.035166667  | -0.008766667 |
| SETD8        | 0.0265       | 0.029666667  | -0.100933333 | 0.0453       | 0.097666667  |
| OTUD4        | 0.183866667  | 0.063166667  | 0.0025       | 0.290733333  | 0.052533333  |
| C2orf49      | 0.027066667  | 0.001933333  | -0.0053      | 0.049633333  | 0.095        |
| TMEM127      | 0.003233333  | -0.169633333 | -0.0333      | -0.054466667 | 0.017366667  |
| NARS2        | -0.004766667 | 0.089466667  | -0.040066667 | 0.0854       | 0.051533333  |
| UNC119       | -0.099633333 | -0.1601      | -0.0266      | -0.077533333 | -0.020466667 |
| KCTD5        | 0.196833333  | 0.053366667  | -0.155033333 | 0.2257       | -0.018666667 |
| SP8          | -0.072066667 | -0.124766667 | -0.171166667 | 0.028033333  | -0.041466667 |
| SDCCAG1      | -0.051833333 | -0.070366667 | -0.006633333 | -0.092733333 | 0.0475       |
| HIST1H4C     | -0.018966667 | -0.116733333 | 0.342666667  | 0.206966667  | 0.0494       |
| SUMO3        | 0.191866667  | 0.018566667  | -0.119033333 | 0.2003       | 0.041466667  |
| KYNU         | -0.3934      | -0.024133333 | -0.0609      | -0.383433333 | 0.144633333  |
| TBC1D10A     | -0.121866667 | -0.0318      | -0.0384      | 0.0677       | 0.052666667  |
| LOC100132705 | 0.167633333  | -0.1567      | -0.049333333 | 0.126966667  | -0.0086      |
| PYCR2        | 0.029533333  | -0.297       | 0.069433333  | -0.0182      | -0.208666667 |

|              |              |              |              |              |              |
|--------------|--------------|--------------|--------------|--------------|--------------|
| TOMM40L      | 0.208366667  | 0.031833333  | -0.080233333 | 0.149666667  | 0.068466667  |
| SPTY2D1      | 0.0799       | -0.034866667 | 0.013833333  | 0.211433333  | 0.0627       |
| LOC100128326 | -0.150633333 | -0.241966667 | -0.017633333 | -0.1232      | -0.1598      |
| ERAP1        | -0.118833333 | -0.019466667 | -0.093533333 | -0.153633333 | 0.0028       |
| CHMP7        | 0.0788       | -0.032133333 | -0.022166667 | 0.120433333  | -0.078966667 |
| CYP2J2       | -0.059666667 | 0.019866667  | -0.125433333 | 0.0214       | 0.0176       |
| ALKBH2       | 0.212833333  | -0.0949      | -0.086666667 | 0.082733333  | 0.034833333  |
| LOC652489    | 0.201066667  | 0.162966667  | -0.0425      | 0.342566667  | 0.1004       |
| IRX5         | 0.093166667  | -0.0935      | -0.072233333 | 0.161266667  | 0.054766667  |
| LOC441454    | -0.0016      | 0.185266667  | -0.134166667 | 0.010966667  | 0.2394       |
| SNORD89      | 0.050666667  | 0.160833333  | -0.075366667 | 0.230133333  | 0.024266667  |
| KRR1         | 0.009366667  | 0.0642       | -0.0764      | 0.0597       | 0.1108       |
| CHTF8        | 0.1045       | -0.185933333 | -0.028166667 | 0.0028       | -0.032       |
| ADNP2        | 0.002333333  | 0.136        | 0.078866667  | 0.168333333  | -0.013933333 |
| NUTF2        | 0.0065       | -0.1072      | -0.101633333 | 0.1037       | -0.011       |
| ACTR10       | -0.162466667 | -0.093033333 | -0.015066667 | -0.1103      | 0.002333333  |
| ATP2A2       | 0.613366667  | 0.048433333  | -0.015566667 | 0.378533333  | 0.1855       |
| TXLNA        | -0.0301      | -0.070933333 | -0.136566667 | -0.014133333 | -0.002466667 |
| MRE11A       | -0.036666667 | 0.036366667  | -0.0594      | 0.0352       | -0.013733333 |
| TOP1P2       | 0.080266667  | 0.128333333  | 0.227933333  | 0.159866667  | 0.2024       |
| PATL1        | 0.226466667  | -0.018533333 | -0.178966667 | 0.185666667  | 0.063766667  |
| NUDT19       | 0.082033333  | -0.067666667 | -0.054633333 | 0.094866667  | 0.008566667  |
| ZNF131       | -0.054066667 | 0.1804       | -0.189833333 | 0.055766667  | 0.051766667  |
| PTAR1        | 0.0581       | -0.220866667 | -0.0181      | 0.0048       | 0.006533333  |
| LOC100128729 | 0.025233333  | -0.039566667 | -0.1033      | 0.144766667  | -0.0525      |
| LOC648210    | 0.130533333  | -0.178133333 | 0.1103       | 0.054233333  | 0.114633333  |
| PSMD13       | 0.375133333  | -0.011233333 | -0.0283      | 0.322333333  | -0.011633333 |
| TRMT61A      | 0.341166667  | 0.1045       | -0.180833333 | 0.548433333  | 0.006        |
| LOC651745    | -0.035133333 | 0.262033333  | -0.302233333 | 0.0218       | 0.3003       |
| KIAA1128     | -0.0712      | -0.0423      | -0.039433333 | -0.028566667 | 0.0473       |
| RNF10        | 0.022833333  | 0.039066667  | -0.153233333 | -0.0213      | -0.019133333 |
| GNPDA2       | 0.023733333  | -0.132466667 | -0.185       | 0.0589       | -0.0819      |
| RAB9A        | -0.3109      | -0.176266667 | 0.024533333  | -0.054133333 | -0.1482      |
| PI4K2A       | -0.0354      | -0.083266667 | 0.001533333  | 0.0368       | 0.0313       |
| MBD2         | 0.1218       | 0.007766667  | -0.107033333 | 0.154233333  | 0.0296       |
| TUBE1        | -0.115566667 | -0.0139      | -0.126966667 | -0.150366667 | 0.093733333  |
| DNAL4        | -0.5555      | -0.243566667 | 0.2324       | -0.314       | -0.0146      |
| USP9X        | -0.164966667 | -0.024133333 | 0.190166667  | 0.005566667  | -0.089766667 |
| HACE1        | 0.028366667  | -0.204566667 | 0.065833333  | 0.125066667  | -0.068933333 |
| CD36         | -0.071666667 | -0.030666667 | -0.070966667 | 0.043233333  | -0.02        |
| EIF3B        | 0.234133333  | -0.0531      | -0.0092      | 0.2687       | 0.186033333  |
| TICAM2       | -0.131833333 | -0.121266667 | 0.116533333  | -0.027966667 | -0.071966667 |
| LOC653458    | -0.3296      | -0.173133333 | 0.177466667  | -0.234433333 | -0.1145      |
| DDX23        | -0.081666667 | 0.051266667  | 0.1492       | 0.095433333  | 0.136333333  |
| ATG4B        | 0.172133333  | -0.0615      | -0.154233333 | 0.241533333  | 0.049366667  |
| CD99L2       | -0.393866667 | -0.2757      | 0.092633333  | -0.2825      | -0.088233333 |
| SPCS3        | 0.1409       | -0.0139      | -0.006733333 | 0.197533333  | 0.034933333  |

|           |              |              |              |              |              |
|-----------|--------------|--------------|--------------|--------------|--------------|
| RBBP7     | 0.119433333  | 0.146        | -0.0852      | 0.196233333  | 0.139533333  |
| OSGEPL1   | -0.140333333 | -0.037033333 | -0.050266667 | -0.1741      | 0.020566667  |
| CSNK2A2   | 0.027066667  | -0.055033333 | -0.126933333 | 0.056166667  | 0.0131       |
| UBE2O     | -0.0287      | -0.015266667 | 0.067166667  | 0.250966667  | -0.0286      |
| COMMD3    | -0.2627      | -0.109533333 | 0.020166667  | -0.095       | -0.0398      |
| PPPDE1    | 0.046166667  | -0.151033333 | -0.0659      | 0.069066667  | 0.031866667  |
| C15orf57  | -0.0646      | -0.1316      | -0.060333333 | 0.161633333  | -0.084533333 |
| SNHG1     | 0.058933333  | 0.010666667  | -0.397833333 | 0.0824       | -0.0707      |
| BP75      | 0.0915       | 0.034133333  | -0.011366667 | 0.2504       | -0.002533333 |
| AGTPBP1   | -0.0909      | -0.350566667 | 0.076933333  | -0.0012      | -0.076566667 |
| COPA      | -0.250366667 | -0.266666667 | 0.156566667  | -0.125166667 | 0.029566667  |
| GNA12     | 0.222266667  | -0.0591      | -0.084566667 | 0.213766667  | -0.0322      |
| RN5S9     | 0.0427       | -0.048166667 | 0.1455       | 0.292266667  | -0.051       |
| BAIAP2L1  | -0.091233333 | 0.021133333  | 0.135733333  | 0.082166667  | -0.053766667 |
| TATDN2    | 0.341033333  | -0.007366667 | -0.023733333 | 0.301866667  | 0.1219       |
| RAD54L    | 0.325133333  | 0.0644       | -0.153166667 | 0.223733333  | -0.0315      |
| LOC647009 | -0.015866667 | -0.054833333 | 0.015366667  | 0.127666667  | 0.0657       |
| C17orf42  | -0.2538      | 0.004566667  | -0.240166667 | -0.1887      | 0.042466667  |
| C1orf188  | 0.251333333  | -0.1151      | -0.0551      | -0.014933333 | 0.069166667  |
| GATAD2A   | 0.2796       | 0.020466667  | -0.060366667 | 0.168366667  | 0.1456       |
| ABCG1     | -0.212833333 | 0.1529       | -0.1459      | -0.040433333 | 0.196766667  |
| ZNF193    | 0.018633333  | -0.0889      | -0.031666667 | 0.134666667  | -0.059833333 |
| ZNF354A   | -0.2572      | 0.092333333  | -0.106633333 | 0.024133333  | -0.005       |
| PDE12     | 0.3167       | -0.1471      | 0.0707       | 0.329433333  | 0.206533333  |
| COMMD7    | -0.115833333 | -0.0383      | -0.1473      | 0.030033333  | -0.029733333 |
| PFN1      | 0.0847       | -0.0369      | 0.031533333  | 0.1465       | 0.002766667  |
| CHFR      | -0.1019      | 0.007166667  | -0.176933333 | -0.180633333 | 0.0409       |
| C1D       | -0.098733333 | -0.048       | 0.0178       | 0.064433333  | -0.0362      |
| NEIL3     | 0.1646       | 0.088533333  | -0.2604      | 0.181066667  | 0.062        |
| MCRS1     | 0.222633333  | -0.0909      | -0.050033333 | 0.217633333  | 0.135666667  |
| ITGA10    | 0.015233333  | 0.048533333  | 0.1625       | 0.108533333  | 0.1697       |
| KIF18A    | 0.025633333  | 0.137366667  | -0.061066667 | 0.116266667  | 0.0734       |
| RNFT1     | -0.197233333 | -0.167066667 | -0.037833333 | -0.2065      | -0.066533333 |
| LOC389465 | 0.062366667  | 0.122033333  | -0.044866667 | 0.1222       | 0.202833333  |
| TFAM      | 0.053        | 0.063866667  | -0.080166667 | 0.170466667  | -0.0152      |
| HOXC8     | 0.2807       | -0.1149      | -0.033166667 | 0.247266667  | 0.007733333  |
| RNF215    | -0.039633333 | -0.1036      | 0.030266667  | 0.0804       | -0.039666667 |
| HSF2      | 0.009233333  | 0.019966667  | 0.0985       | 0.115733333  | 0.0301       |
| ERCC3     | 0.235633333  | -0.0543      | 0.0535       | 0.256666667  | 0.053033333  |
| LOC646674 | -0.0638      | -0.090233333 | 0.100833333  | 0.112433333  | 0.045266667  |
| AP1M1     | -0.060466667 | 0.125666667  | -0.056066667 | -0.054266667 | 0.1645       |
| ACD       | 0.065466667  | -0.000566667 | -0.118766667 | 0.1164       | -0.0279      |
| FEM1B     | 0.237766667  | -0.072033333 | -0.0589      | 0.2687       | 0.039333333  |
| SEC61B    | -0.21        | -0.1726      | 0.137766667  | -0.057633333 | 0.0732       |
| OXTR      | 0.079366667  | -0.0514      | 0.0252       | 0.155433333  | -0.0288      |
| OFD1      | -0.063133333 | -0.062133333 | -0.1236      | -0.023266667 | -0.069866667 |
| CDC42SE2  | 0.110333333  | -0.0041      | -0.3166      | 0.035566667  | 0.0767       |

|              |              |              |              |              |              |
|--------------|--------------|--------------|--------------|--------------|--------------|
| SLC48A1      | -0.366233333 | -0.046166667 | -0.016066667 | -0.197333333 | -0.078       |
| SLC4A1AP     | -0.094066667 | 0.056266667  | -0.025766667 | 0.063533333  | -0.051233333 |
| LPCAT4       | -0.040433333 | -0.054633333 | 0.075466667  | 0.048166667  | 0.067133333  |
| CP110        | 0.212833333  | 0.026233333  | 0.0972       | 0.258733333  | 0.2385       |
| C8orf38      | 0.2647       | 0.068366667  | -0.337933333 | 0.118966667  | 0.057833333  |
| CDC6         | 0.105633333  | -0.001133333 | -0.044133333 | 0.165933333  | 0.0766       |
| ATP5C1       | -0.0658      | -0.1341      | -0.0323      | -0.035033333 | -0.053166667 |
| TIPARP       | 0.110933333  | 0.065633333  | -0.365066667 | 0.165466667  | 0.001366667  |
| AMMECR1L     | -0.159233333 | -0.0135      | -0.1168      | 0.0925       | -0.0639      |
| CDC20        | 0.337066667  | 0.042666667  | -0.120033333 | 0.357        | 0.132033333  |
| TIGD5        | 0.2249       | 0.037633333  | -0.263833333 | 0.052        | 0.0409       |
| MRPL4        | 0.217333333  | 0.057266667  | -0.0587      | 0.388666667  | 0.019866667  |
| DNAJC7       | 0.1603       | 0.0555       | -0.0873      | 0.243333333  | 0.1135       |
| C15orf23     | 0.297566667  | 0.208666667  | -0.0133      | 0.3623       | 0.166        |
| STK38L       | -0.079666667 | -0.0551      | 0.046466667  | 0.0496       | 0.114866667  |
| TUFT1        | 0.271533333  | -0.060033333 | -0.4325      | 0.171333333  | -0.011833333 |
| LOC646849    | 0.098566667  | 0.036466667  | -0.165333333 | 0.064866667  | 0.13         |
| SRP68        | 0.0942       | -0.002433333 | -0.121433333 | 0.101966667  | 0.0386       |
| ENTPD3       | -0.0586      | -0.1607      | -0.113166667 | 0.067833333  | -0.2222      |
| FLJ46552     | 0.235466667  | -0.068333333 | 0.0032       | 0.353        | -0.012566667 |
| KLHL20       | -0.0998      | -0.024233333 | 0.062033333  | 0.0223       | 0.025733333  |
| SYF2         | -0.217466667 | -0.044166667 | -0.085233333 | -0.054566667 | -0.039566667 |
| APEX1        | -0.072466667 | -0.0696      | -0.010266667 | 0.0235       | 0.086933333  |
| PER2         | 0.0409       | -0.194666667 | -0.226633333 | 0.1134       | -0.1275      |
| RFPL4A       | 0.0086       | -0.124066667 | -0.1025      | 0.0536       | -0.105866667 |
| FLJ13305     | -0.007866667 | -0.054833333 | -0.043933333 | 0.015366667  | 0.084833333  |
| MYO10        | 0.105233333  | 0.153133333  | 0.083166667  | 0.153533333  | 0.281133333  |
| NADSYN1      | -0.204533333 | -0.138833333 | 0.029033333  | -0.076166667 | -0.027866667 |
| ORMDL1       | 0.186933333  | -0.063133333 | -0.2331      | 0.1529       | -0.048566667 |
| DDX20        | 0.0899       | 0.041966667  | -0.057333333 | 0.1607       | 0.0521       |
| C17orf81     | 0.097266667  | 0.032666667  | -0.1916      | 0.042433333  | 0.078433333  |
| LOC732432    | 0.076666667  | -0.0592      | 0.0838       | 0.123133333  | 0.078233333  |
| CCNH         | 0.093033333  | -0.078866667 | 0.115266667  | 0.207        | -0.092933333 |
| CTSO         | -0.078633333 | -0.1375      | 0.024533333  | -0.028       | 0.066833333  |
| SBNO2        | 0.003733333  | -0.0431      | 0.027233333  | 0.061133333  | 0.069        |
| SLC12A6      | -0.0934      | 0.061333333  | -0.1037      | 0.1213       | -0.004866667 |
| RNF103       | -0.1729      | -0.1566      | -0.053533333 | -0.0572      | -0.1784      |
| TMEM41B      | -0.079166667 | -0.057133333 | -0.036766667 | -0.046233333 | 0.0015       |
| BLCAP        | 0.060966667  | -0.149633333 | -0.279833333 | 0.0696       | -0.1503      |
| C2orf42      | -0.2523      | -0.22        | -0.141533333 | -0.181333333 | -0.123766667 |
| MRPL1        | -0.064733333 | 0.066633333  | -0.064966667 | 0.091566667  | 0.120266667  |
| BMS1         | 0.263933333  | -0.0032      | -0.097233333 | 0.154366667  | 0.159866667  |
| LOC100130190 | 0.1511       | 0.092866667  | -0.1062      | 0.2384       | 0.009066667  |
| COMMD9       | -0.022333333 | -0.080766667 | -0.060666667 | 0.120233333  | -0.031533333 |
| P4HA2        | -0.336433333 | -0.1222      | 0.1222       | -0.1924      | -0.065366667 |
| LOC399900    | -0.182166667 | 0.433566667  | -0.1388      | 0.0221       | 0.057066667  |
| LOC100133211 | -0.0163      | -0.0285      | -0.154166667 | 0.0074       | 0.1544       |

|              |              |              |              |              |              |
|--------------|--------------|--------------|--------------|--------------|--------------|
| GLRB         | -0.212666667 | -0.155933333 | 0.078033333  | -0.242866667 | -0.091533333 |
| ALG13        | -0.080066667 | 0.047466667  | -0.244666667 | 0.017733333  | -0.0146      |
| USP12        | 0.0824       | 0.0724       | -0.146566667 | 0.290333333  | 0.0111       |
| CARD11       | -0.078066667 | 0.028366667  | 0.013266667  | -0.0436      | 0.088166667  |
| PISD         | 0.359833333  | 0.0218       | -0.079666667 | 0.315933333  | 0.104633333  |
| SIRT6        | -0.048333333 | -0.099266667 | -0.0229      | -0.024033333 | 0.049966667  |
| PDIA4        | -0.1556      | 0.025366667  | 0.213666667  | 0.0341       | 0.037966667  |
| ABCA9        | -0.0706      | 0.053233333  | -0.120933333 | -0.0269      | -0.0265      |
| SLC35B4      | -0.080466667 | -0.036066667 | 0.049166667  | -0.019466667 | 0.056966667  |
| BCS1L        | 0.009566667  | 0.012366667  | -0.203633333 | 0.138266667  | 0.004666667  |
| CTR9         | -0.090533333 | 0.0494       | -0.1168      | -0.0415      | 0.144366667  |
| LOC100130445 | -0.076533333 | 0.545633333  | -0.149766667 | -0.020866667 | 0.266566667  |
| PREPL        | -0.464633333 | -0.061466667 | -0.162866667 | -0.257266667 | 0.0344       |
| LOC645489    | 0.055766667  | 0.011333333  | -0.091733333 | 0.0245       | -0.033533333 |
| SLC39A8      | -0.104666667 | 0.0879       | -0.157033333 | 0.014433333  | 0.061133333  |
| PTTG3P       | 0.121233333  | -0.002066667 | -0.047433333 | 0.206033333  | 0.071566667  |
| FAM134C      | -0.014166667 | -0.051966667 | -0.046066667 | -0.146933333 | 0.0653       |
| SEMA3E       | 0.0273       | 0.5794       | -0.113133333 | 0.0583       | 0.384366667  |
| LOC389901    | 0.104        | 0.104366667  | -0.1003      | 0.0112       | 0.192566667  |
| FECH         | -0.154933333 | -0.1954      | -0.094933333 | -0.077833333 | -0.054433333 |
| EIF2B2       | -0.142133333 | 0.047766667  | 0.1238       | -0.076566667 | 0.1122       |
| FAM44A       | -0.127266667 | -0.109866667 | 0.069533333  | 0.086133333  | -0.0203      |
| FAM86A       | -0.048933333 | -0.0269      | -0.079566667 | -0.028833333 | 0.080133333  |
| LOC652657    | 0.137933333  | -0.105733333 | -0.064266667 | 0.078766667  | 0.064133333  |
| SNX12        | -0.055933333 | -0.042       | 0.0251       | 0.052333333  | -0.0692      |
| SC5DL        | -0.149033333 | -0.3208      | -0.1595      | -0.1139      | -0.1655      |
| NDUF3F3      | -0.243733333 | -0.2752      | 0.161133333  | -0.182966667 | 0.015333333  |
| PEG10        | 0.015033333  | 0.017166667  | -0.023533333 | 0.0321       | 0.114433333  |
| ARPC2        | 0.019933333  | -0.141666667 | 0.113933333  | 0.054833333  | 0.0383       |
| LOC100128476 | -0.0062      | -0.0028      | -0.022766667 | 0.127733333  | -0.010366667 |
| KLF11        | 0.017633333  | -0.012833333 | -0.235466667 | 0.122233333  | -0.139333333 |
| CREB3        | -0.029033333 | 0.022633333  | 0.102933333  | 0.1671       | -0.026333333 |
| RNASEK       | -0.4718      | -0.220533333 | 0.248533333  | -0.2263      | -0.007033333 |
| LOC649555    | 0.081433333  | 0.301733333  | -0.046366667 | 0.159266667  | 0.303433333  |
| DERPC        | 0.067066667  | -0.1816      | 0.043633333  | 0.083166667  | 0.065066667  |
| STARD5       | -0.062866667 | 0.022733333  | -0.027633333 | -0.0239      | 0.0949       |
| LOC731542    | -0.284466667 | 0.119866667  | -0.299333333 | -0.291133333 | 0.145933333  |
| HEATR5A      | -0.017033333 | 0.028133333  | -0.1076      | -0.007033333 | 0.060166667  |
| LOC642210    | 0.043133333  | -0.089166667 | -0.042766667 | 0.069        | 0.0362       |
| DNAJC17      | 0.094033333  | -0.007633333 | -0.0037      | 0.039733333  | 0.173733333  |
| SIL1         | -0.301866667 | -0.250566667 | 0.0611       | -0.219366667 | -0.054066667 |
| LOC283874    | -0.153466667 | -0.0129      | -0.2868      | -0.100833333 | -0.0327      |
| LOC387882    | 0.1186       | 0.2421       | -0.353166667 | 0.2048       | 0.080966667  |
| ACACA        | -0.158666667 | -0.181066667 | 0.1056       | -0.1357      | -0.095166667 |
| FAM114A1     | -0.160433333 | -0.1349      | 0.261266667  | -0.086933333 | -0.0935      |
| FOXJ3        | -0.069733333 | 0.026466667  | 0.106366667  | 0.113933333  | 0.043033333  |
| LOC727773    | 0.0166       | 0.0721       | 0.0058       | 0.197433333  | 0.030733333  |



|              |              |              |              |              |              |
|--------------|--------------|--------------|--------------|--------------|--------------|
| KIAA1370     | -0.395066667 | -0.020033333 | -0.0497      | -0.1143      | -0.0868      |
| THNSL1       | -0.045233333 | 0.008266667  | -0.066433333 | -0.099366667 | 0.098366667  |
| RPRD2        | -0.034166667 | 0.0575       | -0.009266667 | 0.0372       | 0.032        |
| TTK          | -0.0796      | 0.288833333  | 0.035966667  | 0.3013       | 0.108633333  |
| ABCA1        | -0.426533333 | -0.4618      | 0.344266667  | -0.254733333 | -0.2953      |
| NCDN         | -0.010633333 | -0.1507      | -0.077866667 | 0.008866667  | -0.055733333 |
| AVPR2        | -0.0896      | 0.029066667  | -0.0366      | 0.159033333  | -0.0695      |
| TIMM10       | 0.107333333  | 0.0009       | -0.1483      | 0.2298       | -0.0676      |
| OCEL1        | -0.3269      | -0.122766667 | 0.1954       | -0.153633333 | -0.078866667 |
| TOMM22       | 0.097266667  | 0.091433333  | -0.215366667 | 0.0692       | 0.0823       |
| LOC100130008 | 0.1092       | 0.0024       | -0.0774      | 0.207533333  | 0.037966667  |
| MAX          | 0.170833333  | -0.037166667 | -0.045533333 | 0.2296       | -0.0048      |
| AP1S1        | 0.010633333  | -0.019333333 | 0.1754       | -0.024733333 | 0.054466667  |
| RWDD2B       | -0.095266667 | -0.083733333 | 0.042733333  | -0.041966667 | -0.0756      |
| XIAP         | -0.0063      | -0.032066667 | 0.023666667  | 0.021933333  | 0.074966667  |
| ZNF200       | 0.229233333  | 0.008733333  | -0.020966667 | 0.233        | 0.0571       |
| FLJ10803     | -0.027066667 | 0.1602       | -0.021566667 | 0.1155       | 0.113166667  |
| UIMC1        | 0.1452       | 0.0211       | -0.081166667 | 0.130066667  | 0.117133333  |
| RNPC3        | -0.250566667 | 0.019366667  | -0.173266667 | -0.0406      | 0.036533333  |
| APRT         | 0.0454       | -0.235466667 | 0.0723       | 0.0323       | 0.0127       |
| LOC653308    | 0.2115       | 0.1039       | -0.3082      | 0.2179       | -0.004266667 |
| MRPS9        | -0.015766667 | 0.021133333  | -0.072033333 | 0.067666667  | 0.047966667  |
| LOC100130009 | 0.1886       | -0.103266667 | 0.3425       | 0.198966667  | 0.049533333  |
| TOPORS       | -0.153833333 | 0.1018       | -0.056266667 | -0.091433333 | 0.0347       |
| LOC652634    | -0.0254      | 0.026866667  | -0.205366667 | 0.0277       | -0.019966667 |
| SNORD69      | 0.185333333  | -0.06        | -0.112733333 | 0.1404       | 0.1484       |
| FDX1         | -0.054566667 | 0.030266667  | -0.119433333 | -0.028133333 | 0.0835       |
| INO80B       | -0.1075      | 0.0173       | -0.062466667 | 0.056333333  | 0.0516       |
| RSBN1        | 0.049833333  | -0.132666667 | 0.145366667  | 0.093466667  | 0.0535       |
| CDK5RAP2     | 0.092733333  | -0.036933333 | -0.022466667 | 0.117333333  | 0.069833333  |
| LOC100129982 | -0.4077      | 0.0145       | -0.206866667 | -0.201       | 0.098033333  |
| ITGB3        | 0.072466667  | -0.0144      | 0.675733333  | 0.098533333  | 0.197166667  |
| GIPC1        | 0.1719       | -0.125033333 | -0.030433333 | 0.133733333  | 0.065933333  |
| AZIN1        | 0.091533333  | 0.0874       | -0.147366667 | 0.011766667  | 0.147866667  |
| MAK10        | 0.055933333  | -0.121033333 | -0.127166667 | -0.0092      | -0.093       |
| SFT2D1       | -0.0013      | -0.032433333 | 0.044866667  | 0.0738       | 0.0765       |
| TBC1D9       | -0.282866667 | -0.370133333 | 0.171233333  | -0.294733333 | 0.052833333  |
| EDARADD      | -0.083266667 | -0.025666667 | -0.095633333 | 0.033866667  | 0.011533333  |
| CA8          | -0.002466667 | -0.040933333 | 0.042333333  | 0.080533333  | 0.0073       |
| FUT4         | -0.008166667 | 0.023966667  | -0.027833333 | 0.0668       | 0.0632       |
| GOT2         | 0.006033333  | -0.0438      | -0.1232      | -0.014666667 | 0.0558       |
| LOC729021    | 0.022733333  | 0.002133333  | -0.024366667 | -0.063133333 | 0.0926       |
| LOC100133836 | 0.478233333  | 0.189766667  | -0.027966667 | 0.53         | 0.268033333  |
| DPP7         | -0.0516      | -0.3283      | -0.0373      | -0.0779      | -0.078533333 |
| COASY        | -0.122566667 | -0.051866667 | 0.0732       | -0.041866667 | 0.1674       |
| ATP5F1       | -0.033533333 | -0.0424      | -0.007766667 | 0.052666667  | 0.0491       |
| LOC728895    | 0.101666667  | -0.092933333 | -0.027633333 | 0.117066667  | -0.042133333 |

|               |              |              |              |              |              |
|---------------|--------------|--------------|--------------|--------------|--------------|
| TMEM79        | 0.070033333  | -0.121566667 | -0.161666667 | 0.149033333  | -0.050966667 |
| SKIV2L2       | 0.0361       | 0.1367       | -0.1017      | 0.1499       | 0.0612       |
| KIAA1333      | 0.080433333  | 0.025966667  | 0.147533333  | 0.063833333  | 0.1888       |
| P2RY5         | -0.376366667 | 0.0434       | 0.432666667  | -0.009866667 | 0.134966667  |
| SLC29A3       | -0.1155      | -0.075433333 | -0.1893      | 0.003133333  | 0.020866667  |
| TPP2          | -0.123966667 | 0.2803       | -0.033166667 | 0.046866667  | 0.1551       |
| DKFZP586I1420 | -0.025833333 | -0.089233333 | 0.057133333  | 0.021966667  | -0.021733333 |
| SMYD5         | 0.034466667  | 0.0452       | -0.062933333 | 0.104066667  | 0.070633333  |
| LOC731985     | 0.068533333  | -0.047666667 | 0.010266667  | 0.1403       | 0.0141       |
| TMTC3         | -0.042166667 | 0.010333333  | -0.055966667 | 0.039766667  | 0.1566       |
| CBR3          | 0.182166667  | 0.008533333  | -0.1165      | 0.071566667  | 0.069333333  |
| NDST1         | 0.1052       | -0.1553      | -0.030066667 | 0.087966667  | 0.0145       |
| FLJ38973      | 0.027166667  | -0.0368      | 0.0833       | 0.1731       | 0.165833333  |
| FAM70B        | -0.0975      | 0.0546       | 0.011733333  | 0.087133333  | 0.014533333  |
| FAM175B       | 0.041666667  | 0.0379       | -0.113933333 | 0.151433333  | -0.091133333 |
| C14orf143     | -0.0518      | 0.029533333  | 0.065866667  | 0.0208       | 0.082266667  |
| WBSCR16       | 0.100433333  | -0.010233333 | -0.059433333 | 0.215333333  | 0.010666667  |
| LOC649604     | 0.2291       | -0.103333333 | -0.087033333 | 0.110566667  | 0.044966667  |
| MIR300        | -0.098       | 0.003733333  | -0.148133333 | -0.0029      | -0.025166667 |
| RLF           | 0.0123       | -0.013666667 | 0.133533333  | 0.1108       | 0.020466667  |
| FRG1          | -0.1154      | 0.033533333  | -0.019066667 | 0.095066667  | 0.0273       |
| LOC392635     | 0.008366667  | 0.1128       | -0.065933333 | 0.196966667  | 0.101166667  |
| MGC35361      | 0.077        | 0.056533333  | -0.019166667 | 0.245866667  | 0.0313       |
| MGC11082      | -0.0805      | -0.1143      | 0.084733333  | -0.164066667 | 0.045766667  |
| DEGS1         | 0.165833333  | 0.039066667  | 0.107366667  | 0.395        | -0.066833333 |
| CHCHD2        | -0.010966667 | -0.051866667 | -0.028033333 | 0.026133333  | 0.007566667  |
| EPHB1         | 0.356733333  | -0.041133333 | -0.069866667 | 0.154133333  | 0.0619       |
| TMEM101       | -0.348833333 | -0.2625      | -0.076133333 | -0.2559      | -0.146933333 |
| LOC728734     | -0.022033333 | -0.157866667 | -0.2511      | 0.102366667  | -0.188       |
| XPO5          | 0.2641       | 0.009533333  | -0.095       | 0.1842       | 0.105333333  |
| MITD1         | -0.315366667 | -0.100366667 | 0.0491       | -0.0335      | -0.048866667 |
| TRIOBP        | -0.1313      | 0.178833333  | 0.593033333  | 0.032066667  | 0.292233333  |
| SNX24         | 0.0941       | 0.056166667  | -0.2098      | 0.1638       | 0.0348       |
| GSTT1         | -0.533366667 | -0.282833333 | 0.307733333  | -0.389066667 | 0.092733333  |
| HINT1         | -0.023633333 | -0.047566667 | -0.0003      | 0.085266667  | 0.0127       |
| MPP2          | -0.0671      | 0.154133333  | -0.047033333 | -0.0168      | 0.1317       |
| LOC399804     | -0.2123      | 0.034166667  | -0.137366667 | -0.101       | 0.207        |
| SLC25A40      | -0.095366667 | -0.099033333 | 0.227166667  | 0.1196       | -0.002466667 |
| PDRG1         | 0.2238       | -0.066733333 | -0.1976      | 0.331        | -0.076333333 |
| LOC100130633  | -0.254633333 | -0.163433333 | 0.090466667  | -0.2181      | 0.048133333  |
| RNF113A       | -0.1008      | -0.272133333 | 0.0839       | -0.143433333 | 0.074766667  |
| CCDC127       | 0.004866667  | -0.111766667 | -0.0239      | 0.043733333  | -0.0178      |
| ZMIZ2         | -0.037833333 | 0.022433333  | -0.1038      | -0.031366667 | 0.128233333  |
| FAM115A       | -0.180333333 | 0.302166667  | -0.074566667 | -0.0553      | -0.0095      |
| THAP6         | -0.145666667 | -0.095366667 | 0.142666667  | -0.081533333 | 0.0788       |
| PI4KB         | -0.1325      | -0.061533333 | -0.149366667 | -0.017266667 | -0.024533333 |
| MPDU1         | 0.2184       | 0.019966667  | -0.0979      | 0.104766667  | 0.251366667  |

|           |              |              |              |              |              |
|-----------|--------------|--------------|--------------|--------------|--------------|
| SNAPC4    | 0.148066667  | 0.063866667  | -0.062633333 | 0.275433333  | 0.066333333  |
| CHCHD9    | 0.021733333  | 0.013466667  | -0.0969      | -0.028033333 | 0.057033333  |
| PEX10     | -0.040066667 | -0.042666667 | -0.0139      | 0.159933333  | -0.036866667 |
| TMEM107   | -0.1816      | -0.049733333 | 0.009        | -0.095066667 | -0.025433333 |
| NBPF20    | -0.113733333 | -0.243566667 | 0.317533333  | -0.1715      | -0.2019      |
| COX4NB    | 0.175866667  | 0.0706       | -0.177333333 | 0.248566667  | -0.001       |
| EPS15     | -0.1566      | 0.015366667  | 0.1081       | 0.076466667  | 0.027066667  |
| LOC399988 | 0.465066667  | 0.1348       | 0.0613       | 0.253966667  | 0.225066667  |
| SH3KBP1   | -0.1138      | -0.077       | 0.155933333  | -0.029433333 | 0.0864       |
| SHROOM3   | -0.285866667 | 0.1653       | 0.137366667  | 0.149566667  | 0.046        |
| NANP      | 0.108        | 0.0969       | -0.065333333 | 0.19         | 0.065033333  |
| GOLGA5    | -0.227133333 | -0.049233333 | -0.133766667 | -0.058733333 | -0.1183      |
| CASP1     | -0.1143      | -0.031       | -0.045766667 | -0.044033333 | 0.0429       |
| CXorf61   | -0.0693      | -0.167966667 | -0.103033333 | 0.034        | -0.051766667 |
| TMEM69    | -0.034033333 | -0.097       | -0.044866667 | 0.0525       | -0.0643      |
| POLR3D    | 0.103966667  | 0.0762       | 0.036633333  | 0.1246       | 0.0682       |
| EFR3A     | -0.1493      | -0.119566667 | 0.0282       | -0.099166667 | -0.083       |
| COX10     | 0.150966667  | -0.051733333 | -0.154533333 | 0.043933333  | 0.144466667  |
| MVD       | -0.090966667 | 0.022133333  | -0.093866667 | -0.0569      | 0.0667       |
| GLTPD1    | 0.108233333  | -0.1845      | -0.109366667 | 0.0388       | -0.027933333 |
| ARL5A     | 0.161133333  | -0.1524      | 0.068633333  | 0.096433333  | 0.181266667  |
| PSMD7     | -0.071266667 | -0.1383      | -0.013466667 | -0.004366667 | -0.0095      |
| LOC391044 | 0.0793       | 0.016333333  | -0.099       | 0.035233333  | 0.0219       |
| SBF2      | -0.134733333 | -0.034933333 | -0.045133333 | -0.120033333 | 0.012533333  |
| C14orf138 | -0.000666667 | 0.038933333  | 0.008733333  | 0.1652       | 0.044666667  |
| FOSL2     | -0.021133333 | -0.2079      | -0.137933333 | 0.022533333  | -0.126966667 |
| SNX3      | -0.131233333 | -0.0092      | -0.0393      | -0.056866667 | 0.086966667  |
| SPAG16    | -0.246566667 | -0.008566667 | -0.0387      | -0.1039      | 0.036966667  |
| AMFR      | -0.033133333 | -0.112166667 | -0.009433333 | 0.0512       | -0.0473      |
| MSRB3     | -0.065       | 0.072633333  | -0.0514      | 0.051633333  | 0.1263       |
| ITGA4     | 0.011866667  | -0.1231      | 0.248166667  | 0.0909       | -0.1044      |
| FAM81A    | -0.0022      | -0.070366667 | 0.005933333  | 0.012333333  | 0.1136       |
| RNY1      | -0.189       | -0.682733333 | 0.4354       | 0.029233333  | 0.1622       |
| UBQLN1    | 0.343233333  | 0.0042       | -0.061866667 | 0.207733333  | 0.154733333  |
| DDX10     | 0.0331       | 0.033933333  | 0.051266667  | 0.183666667  | 0.103166667  |
| ST7L      | -0.0755      | -0.017633333 | -0.072766667 | 0.0397       | -0.0401      |
| ZFP1      | 0.003033333  | 0.0191       | 0.007866667  | 0.121933333  | 0.1467       |
| SLC25A38  | 0.3296       | -0.050533333 | -0.128233333 | 0.298833333  | -0.050966667 |
| TP53TG1   | -0.1499      | 0.054133333  | -0.036       | -0.071733333 | 0.191733333  |
| SMN2      | 0.186633333  | 0.087233333  | -0.137633333 | 0.263066667  | 0.105        |
| NAP1L3    | -0.009166667 | -0.1885      | -0.185866667 | -0.020866667 | 0.022666667  |
| LOC729960 | 0.0075       | -0.020366667 | -0.0164      | -0.0834      | 0.038766667  |
| PRKX      | -0.020033333 | 0.078133333  | -0.062966667 | -0.018966667 | 0.029866667  |
| C9orf64   | -0.2728      | 0.0333       | -0.094766667 | -0.291266667 | 0.145366667  |
| LOC649260 | 0.085766667  | 0.0221       | -0.027733333 | 0.106166667  | 0.133166667  |
| GTF2H4    | -0.032933333 | 0.065966667  | -0.010733333 | -0.033133333 | 0.094866667  |
| C1orf109  | 0.371133333  | 0.013866667  | 0.025133333  | 0.5386       | -0.085766667 |

|              |              |              |              |              |              |
|--------------|--------------|--------------|--------------|--------------|--------------|
| ABCE1        | 0.307066667  | -0.0335      | 0.027233333  | 0.3296       | 0.129866667  |
| MIR30B       | 0.211666667  | 0.0931       | -0.138666667 | 0.120333333  | 0.151033333  |
| GTPBP10      | 0.112933333  | 0.1754       | -0.180933333 | 0.133333333  | 0.0695       |
| COQ5         | -0.384166667 | -0.154       | -0.0233      | -0.245633333 | 0.010766667  |
| NDUFB9       | -0.147666667 | -0.043433333 | -0.077166667 | -0.092066667 | 0.0863       |
| EAPP         | -0.409666667 | -0.0529      | -0.151133333 | -0.1962      | -0.1312      |
| LZTFL1       | -0.125166667 | 0.0114       | -0.136933333 | 0.0188       | -0.010366667 |
| C19orf31     | 0.081233333  | -0.2154      | 0.0272       | -0.034433333 | 0.069566667  |
| C1orf19      | 0.0881       | -0.053       | -0.2715      | 0.134866667  | -0.030933333 |
| RRM1         | 0.171833333  | -0.058666667 | -0.054       | 0.156833333  | 0.0362       |
| METT5D1      | -0.020233333 | -0.045733333 | -0.048666667 | -0.078633333 | 0.0507       |
| FLJ37396     | -0.097       | 0.2428       | -0.1594      | 0.056866667  | 0.115133333  |
| B9D1         | -0.400466667 | -0.289966667 | 0.292433333  | -0.211166667 | -0.134733333 |
| LOC646675    | -0.051833333 | -0.034666667 | 0.0021       | 0.130866667  | 0.011366667  |
| GSTP1        | -0.0493      | -0.092166667 | -0.051       | 0.013166667  | -0.0219      |
| CLEC16A      | -0.0352      | -0.089566667 | -0.047       | -0.007766667 | 0.023233333  |
| REEP6        | -0.188566667 | -0.352       | 0.0533       | -0.359633333 | -0.0419      |
| SLMO1        | 0.079        | -0.072       | -0.102366667 | 0.109666667  | -0.081233333 |
| RPS8         | -0.107133333 | -0.033266667 | -0.014733333 | 0.029733333  | -0.087866667 |
| MUL1         | -0.020133333 | 0.023533333  | -0.148733333 | -0.037133333 | 0.0609       |
| IMP4         | 0.176166667  | -0.032333333 | -0.110866667 | 0.172166667  | 0.048733333  |
| KIAA0907     | 0.0155       | -0.0964      | -0.040166667 | 0.092133333  | 0.0169       |
| UPRT         | -0.115233333 | -0.007333333 | 0.079066667  | 0.038033333  | 0.1177       |
| RRN3         | 0.0441       | 0.032166667  | -0.0041      | 0.139566667  | 0.094733333  |
| OPTN         | -0.471433333 | -0.231933333 | 0.168333333  | -0.1742      | -0.0277      |
| FAM119A      | -0.1735      | 0.524166667  | -0.0758      | -0.109533333 | 0.316233333  |
| SS18         | 0.301533333  | 0.1049       | -0.0905      | 0.283066667  | 0.164133333  |
| ZCCHC5       | 0.322133333  | 0.095666667  | -0.3556      | 0.355866667  | 0.181166667  |
| MDH2         | -0.0457      | -0.0849      | 0.026433333  | 0.001233333  | 0.026166667  |
| LOC100132395 | -0.230766667 | -0.155233333 | -0.028666667 | -0.1389      | -0.0061      |
| CUL4B        | -0.166533333 | -0.108333333 | 0.1265       | 0.0306       | -0.054633333 |
| IRAK2        | -0.196066667 | 0.0118       | 0.043266667  | -0.022466667 | 0.1264       |
| SPIRE1       | 0.006033333  | -0.109533333 | -0.183333333 | 0.0276       | -0.099133333 |
| LOC441054    | -0.017133333 | 0.0208       | -0.095166667 | 0.049666667  | 0.064366667  |
| JMJD1C       | 0.010233333  | -0.0102      | 0.223166667  | 0.1488       | -0.0483      |
| UBXN8        | 0.029433333  | -0.035133333 | -0.072166667 | 0.0398       | 0.038333333  |
| LOC389101    | 0.0159       | -0.1655      | 0.028966667  | -0.025333333 | 0.0717       |
| TXNDC14      | 0.1664       | -0.015033333 | -0.192866667 | 0.207733333  | 0.002133333  |
| MKLN1        | -0.082266667 | -0.091233333 | 0.038166667  | -0.038966667 | -0.116333333 |
| ZNF672       | 0.265733333  | -0.1761      | -0.0908      | 0.1005       | 0.090466667  |
| RPA1         | 0.147433333  | 0.107866667  | -0.028933333 | 0.141933333  | 0.1614       |
| DIDO1        | 0.143066667  | 0.012933333  | -0.070033333 | 0.054566667  | 0.045533333  |
| C22orf29     | 0.0625       | -0.131733333 | 0.007        | 0.111966667  | 0.030533333  |
| AASDHPPT     | -0.019533333 | -0.0023      | 0.044533333  | 0.149333333  | 0.0023       |
| NFIL3        | -0.465933333 | -0.3371      | -0.229866667 | -0.431766667 | -0.142866667 |
| CUL4A        | 0.031066667  | 0.120466667  | -0.063233333 | 0.097366667  | 0.1187       |
| CPSF4        | 0.061566667  | -0.123333333 | -0.075466667 | -0.043566667 | -0.000233333 |

|              |              |              |              |              |              |
|--------------|--------------|--------------|--------------|--------------|--------------|
| RAC1         | 0.013566667  | -0.097366667 | -0.150766667 | -0.032733333 | -0.029766667 |
| UBL4A        | 0.180966667  | 0.005833333  | -0.113666667 | 0.0811       | 0.084333333  |
| SNHG12       | 0.2339       | 0.1044       | -0.167633333 | 0.2109       | 0.089633333  |
| PFAAP5       | -0.101366667 | -0.024533333 | 0.003633333  | 0.016        | 0.0107       |
| HK2          | 0.102466667  | 0.016        | 0.005766667  | 0.060733333  | 0.042266667  |
| LOC653438    | -0.019       | -0.0606      | -0.0691      | -0.1004      | 0.19         |
| LOC728888    | 0.1098       | -0.244166667 | -0.1219      | 0.0303       | -0.1159      |
| LOC644877    | 0.353933333  | 0.118866667  | -0.172066667 | 0.2349       | 0.188233333  |
| LOC653650    | -0.0454      | -0.050533333 | 0.009966667  | -0.132033333 | 0.232466667  |
| PGBD4        | -0.104866667 | -0.017666667 | -0.108433333 | -0.154166667 | 0.104966667  |
| SFRS5        | -0.073166667 | -0.019133333 | -0.1223      | 0.076966667  | -0.0723      |
| ZNF673       | -0.033066667 | 0.001866667  | -0.153966667 | -0.053533333 | 0.022666667  |
| RHOA         | -0.111166667 | 0.0114       | -0.000433333 | 0.135533333  | -0.019266667 |
| DPY19L1      | -0.0384      | -0.013433333 | 0.003466667  | -0.177233333 | 0.053833333  |
| THAP4        | 0.191433333  | -0.1081      | -0.113233333 | 0.2113       | -0.0141      |
| RING1        | -0.118166667 | -0.0382      | -0.094133333 | -0.026033333 | -0.0548      |
| MVK          | -0.088633333 | -0.208966667 | 0.0929       | 0.1016       | -0.0351      |
| NKRF         | 0.039233333  | 0.243266667  | -0.081966667 | 0.019533333  | 0.094366667  |
| LOC100130422 | -0.255633333 | -0.071266667 | -0.0757      | -0.156466667 | 0.0173       |
| SLC35F5      | -0.2683      | -0.0564      | -0.029966667 | -0.153166667 | 0.019066667  |
| PRDX2        | 0.007233333  | -0.252266667 | -0.0836      | -0.1067      | -0.096433333 |
| LOC652291    | -0.0321      | -0.051366667 | -0.1905      | 0.0265       | -0.006       |
| F12          | -0.233866667 | 0.1065       | 0.1579       | -0.0432      | 0.099666667  |
| BPGM         | 0.001266667  | 0.038166667  | -0.237       | 0.073966667  | -0.0243      |
| GNPNAT1      | 0.1517       | -0.132466667 | -0.1599      | 0.113433333  | 0.0268       |
| ZMYND11      | -0.034633333 | -0.096633333 | -0.181166667 | 0.000266667  | -0.001966667 |
| CTNND1       | -0.0369      | -0.0946      | 0.017833333  | -0.122466667 | 0.086233333  |
| HIP2         | 0.123933333  | -0.022333333 | -0.155033333 | 0.055266667  | 0.016366667  |
| SLC30A6      | 0.1189       | 0.0514       | -0.228333333 | 0.0073       | 0.048266667  |
| LOC729559    | 0.1327       | 0.044666667  | -0.0496      | 0.1106       | 0.079466667  |
| RASSF1       | 0.556933333  | -0.001433333 | -0.100866667 | 0.541566667  | -0.000266667 |
| SCARNA16     | -0.0137      | -0.004733333 | -0.107866667 | 0.027466667  | 0.012833333  |
| RFC1         | 0.12         | 0.0007       | -0.1467      | 0.0247       | 0.035133333  |
| IFI30        | -0.1327      | -0.045166667 | 0.049866667  | -0.0571      | 0.1304       |
| LOC100130506 | 0.034        | -0.1764      | -0.4106      | 0.041733333  | -0.095533333 |
| SNORD104     | 0.145766667  | -0.113166667 | -0.2619      | -0.1922      | 0.1603       |
| C22orf39     | -0.015066667 | -0.113333333 | -0.074766667 | 0.0162       | 0.034866667  |
| ANXA7        | -0.013266667 | -0.153233333 | -0.1068      | 0.040766667  | -0.017733333 |
| UBE2R2       | -0.145666667 | 0.0963       | 0.039433333  | -0.0587      | 0.090133333  |
| LOC440353    | 0.143366667  | -0.1939      | -0.091133333 | 0.117466667  | -0.130166667 |
| ITSN1        | -0.068233333 | -0.100966667 | 0.029566667  | -0.0094      | 0.015        |
| RBM23        | -0.270233333 | 0.1099       | 0.102366667  | 0.010233333  | 0.030633333  |
| LOC648509    | -0.015033333 | -0.031133333 | 0.1094       | 0.1192       | 0.0146       |
| GTSF1        | -0.289366667 | -0.089633333 | 0.044733333  | -0.1857      | -0.063066667 |
| CSDA         | 0.070566667  | -0.117566667 | 0.0758       | 0.0755       | 0.1159       |
| LRRC42       | -0.0245      | -0.036633333 | 0.054366667  | 0.080166667  | -0.029933333 |
| C2orf29      | -0.0089      | 0.044766667  | -0.044966667 | -0.010266667 | 0.107033333  |

|              |              |              |              |              |              |
|--------------|--------------|--------------|--------------|--------------|--------------|
| TSR1         | 0.165666667  | -0.0129      | -0.147       | 0.117466667  | -0.0931      |
| ZNF394       | -0.2363      | 0.4463       | -6.67E-05    | -0.007166667 | 0.174        |
| MLH1         | -0.066866667 | -0.0016      | -0.090866667 | -0.006666667 | -0.037233333 |
| BTF3L4       | -0.004866667 | 0.104133333  | -0.1894      | 0.104733333  | -0.160933333 |
| FGD1         | -0.0816      | -0.065166667 | 0.035133333  | -0.068633333 | -0.023633333 |
| TMEM48       | 0.416966667  | 0.0826       | -0.1808      | 0.253766667  | 0.001766667  |
| SLC26A11     | -0.0024      | -0.324266667 | -0.1258      | -0.172166667 | -0.087866667 |
| LOC727808    | -0.008766667 | 0.135433333  | 0.0237       | -0.0685      | 0.108966667  |
| RUNDC1       | 0.0703       | -0.172433333 | -0.080633333 | 0.085833333  | -0.097566667 |
| LONP2        | -0.171766667 | -0.1468      | -0.050166667 | -0.114266667 | -0.038166667 |
| LOC127295    | -0.153433333 | -0.034933333 | -0.019466667 | 0.032866667  | -0.026233333 |
| CLINT1       | 0.081966667  | -0.109466667 | 0.092466667  | 0.064466667  | 0.162966667  |
| GTF3C3       | -0.1873      | -0.016033333 | -0.033366667 | -0.115433333 | 0.005733333  |
| DGKD         | 0.1244       | -0.079433333 | -0.005533333 | 0.1326       | 0.026933333  |
| COL8A2       | 0.023466667  | -0.151266667 | 0.1572       | 0.1639       | 0.0016       |
| CCDC91       | -0.219966667 | -0.058666667 | -0.070233333 | -0.1351      | 0.0415       |
| INTS7        | 0.201033333  | 0.061733333  | -0.373533333 | 0.1751       | 0.008666667  |
| SLC25A16     | 0.044266667  | 0.038166667  | -0.161433333 | 0.074933333  | 0.046433333  |
| RSBN1L       | -0.0383      | -0.023066667 | 0.128066667  | 0.186066667  | 0.066133333  |
| TMED7        | 0.103233333  | -0.195366667 | 0.1258       | 0.101        | 0.048733333  |
| HDAC1        | -0.091666667 | -0.198466667 | 0.0905       | -0.083633333 | 0.041033333  |
| LOC100133232 | -0.116066667 | -0.036366667 | -0.0518      | 0.112133333  | -0.036       |
| PI4KAP1      | 0.044633333  | 0.070166667  | -0.150666667 | -0.001766667 | 0.124        |
| PHF13        | 0.0371       | 0.0157       | 0.2067       | 0.3104       | -0.069       |
| GTF2H2       | 0.061033333  | 0.1543       | -0.240833333 | 0.086033333  | 0.111033333  |
| PHACTR2      | -0.020866667 | -0.022       | -0.014766667 | 0.054866667  | 0.1366       |
| LOC646348    | -0.051933333 | -0.155766667 | 0.000566667  | -0.039133333 | -0.0681      |
| NPHP3        | -0.0918      | -0.106666667 | 0.0913       | 0.067533333  | -0.014533333 |
| GPR56        | -0.164       | -0.274933333 | 0.283666667  | -0.170166667 | -0.011966667 |
| NRP1         | -0.134833333 | 0.0968       | 0.0852       | -0.082633333 | 0.0959       |
| DNAJB5       | -0.126633333 | -0.049466667 | -0.051866667 | -0.036366667 | -0.0487      |
| CCNJ         | 0.086733333  | 0.064466667  | -0.0184      | 0.159566667  | 0.1761       |
| SPRN         | 0.051866667  | -0.16        | -0.009233333 | 0.1167       | -0.063166667 |
| MAP9         | -0.2126      | -0.0057      | -0.135       | -0.146133333 | 0.042066667  |
| MYL5         | -0.290466667 | -0.238933333 | 0.185766667  | -0.065533333 | -0.115133333 |
| MCM3         | 0.3768       | 0.038933333  | -0.097733333 | 0.3019       | 0.0199       |
| NT5C3        | 0.272866667  | 0.019966667  | -0.192066667 | 0.390566667  | 0.0689       |
| EFHC1        | -0.1233      | -0.039633333 | -0.0298      | -0.122133333 | 0.007266667  |
| COBRA1       | 0.131533333  | 0.0243       | -0.047566667 | 0.179        | -0.053333333 |
| MSH3         | 0.054366667  | -0.242966667 | 0.015166667  | -0.010966667 | 0.0358       |
| XRCC3        | 0.201766667  | 0.0035       | -0.048566667 | 0.191033333  | 0.036533333  |
| C1orf50      | 0.0009       | -0.147833333 | -0.090733333 | -0.035766667 | -0.046566667 |
| AK1          | -0.3593      | -0.0426      | 0.012633333  | -0.265       | 0.073766667  |
| MPHOSPH10    | -0.042033333 | 0.091333333  | -0.074166667 | 0.130166667  | 0.1628       |
| EXOC7        | -0.093866667 | -0.180166667 | 0.0035       | -0.016166667 | -0.081166667 |
| INPP5K       | -0.0246      | -0.037566667 | -0.0614      | -0.019566667 | 0.007866667  |
| TBX18        | -0.099266667 | -0.140366667 | 0.048766667  | -0.060066667 | 0.050733333  |

|           |              |              |              |              |              |
|-----------|--------------|--------------|--------------|--------------|--------------|
| UCKL1     | 0.011233333  | -0.205233333 | 0.106133333  | 0.067166667  | -0.059766667 |
| TCF25     | -0.239066667 | -0.366566667 | 0.039566667  | -0.171566667 | -0.254966667 |
| TIGD1     | -0.0339      | -0.0355      | -0.105233333 | 0.071666667  | 0.1324       |
| EIF5      | 0.125966667  | -0.070366667 | -0.127366667 | 0.052133333  | 0.049633333  |
| TMEM87B   | -0.0479      | -0.017233333 | 0.164233333  | 0.1126       | 0.032933333  |
| NXF1      | 0.361233333  | -0.192933333 | -0.011933333 | 0.262366667  | 0.017066667  |
| PUS7L     | -0.0262      | 0.1474       | -0.078       | 0.0296       | 0.148733333  |
| BRWD2     | -0.266133333 | -0.130966667 | -0.175133333 | -0.138633333 | -0.101333333 |
| C21orf57  | -0.207266667 | -0.102033333 | 0.101        | -0.145866667 | 0.070266667  |
| TCERG1    | 0.155133333  | 0.097733333  | -0.131933333 | 0.208266667  | 0.046233333  |
| SH3BP4    | 0.492133333  | 0.052133333  | -0.4218      | 0.4678       | -0.0085      |
| LOC641806 | -0.01        | 0.021633333  | -0.019       | 0.028066667  | 0.158533333  |
| CENPK     | 0.224        | 0.067866667  | -0.085933333 | 0.0896       | 0.092366667  |
| MTM1      | 0.1124       | 0.0066       | -0.284133333 | 0.1002       | -0.088633333 |
| CXXC1     | 0.143466667  | -0.155866667 | -0.1094      | 0.028066667  | -0.018566667 |
| ORC3L     | -0.051533333 | -0.0537      | -0.160433333 | 0.086666667  | -0.120666667 |
| KBTBD7    | -0.307533333 | 0.0687       | -0.006233333 | -0.196433333 | 0.1256       |
| C21orf66  | 0.0994       | 0.0338       | -0.160266667 | 0.1104       | 0.0934       |
| BCL2L11   | 0.077066667  | -0.097133333 | -0.041533333 | 0.128233333  | 0.014        |
| NMT1      | 0.052366667  | -0.000933333 | -0.058433333 | 0.148066667  | -0.006133333 |
| TCHP      | 0.184166667  | 0.0148       | -0.133066667 | 0.147766667  | 0.104266667  |
| PRPF4     | 0.2179       | 0.008266667  | -0.007533333 | 0.252766667  | 0.0128       |
| PGAM5     | 0.215366667  | 0.285233333  | -0.3059      | 0.1727       | 0.073266667  |
| NOTCH2    | 0.048566667  | -0.054033333 | -0.0994      | 0.165666667  | -0.121333333 |
| TBL2      | 0.209333333  | -0.002033333 | 0.0024       | 0.2587       | 0.068266667  |
| LOC647450 | -0.047933333 | 0.223833333  | -0.0303      | 0.195933333  | 0.018666667  |
| RAB7L1    | -0.004033333 | -0.194466667 | -0.1597      | -0.0712      | -0.154066667 |
| SMPD2     | -0.038966667 | -0.1076      | -0.077533333 | -0.0036      | 0.001266667  |
| SH3BGRL3  | -0.3023      | -0.367766667 | 0.198266667  | -0.2261      | -0.1594      |
| DIAPH1    | 0.172666667  | 0.055333333  | 0.002166667  | 0.108166667  | 0.151533333  |
| NDUFA6    | -0.0733      | -0.053833333 | -0.166766667 | 0.004166667  | -0.1002      |
| LOC654155 | 0.056333333  | 0.032466667  | -0.110433333 | 0.142533333  | 0.075033333  |
| RNF145    | -0.057266667 | -0.073133333 | 0.290633333  | -0.014366667 | 0.105966667  |
| RBAK      | 0.0109       | -0.068       | -0.008233333 | -0.0035      | -0.04        |
| MOAP1     | 0.0097       | -0.317066667 | -0.1072      | 0.0345       | -0.206633333 |
| RANBP3    | 0.0441       | -0.049466667 | -0.062433333 | 0.0358       | 0.0238       |
| LRBA      | 0.0447       | -0.009266667 | 0.015666667  | 0.087466667  | -0.047333333 |
| DLG5      | -0.043333333 | 0.066533333  | 0.0806       | 0.0637       | 0.050066667  |
| LOC391692 | 0.162533333  | 0.1425       | -0.146666667 | 0.096033333  | 0.2594       |
| UMPS      | 0.1143       | 0.1101       | -0.0673      | 0.189466667  | 0.109033333  |
| C19orf44  | 0.010633333  | -0.093533333 | 0.050766667  | 0.006933333  | 0.0042       |
| GNG10     | -0.2464      | -0.144833333 | -0.2138      | -0.141       | -0.0239      |
| WDR7      | -0.088866667 | -0.121366667 | -0.016566667 | -0.0066      | -0.0329      |
| ACOX1     | -0.163833333 | -0.0583      | -0.043566667 | -0.165966667 | 0.0318       |
| HPS4      | -0.0194      | 0.054666667  | -0.134666667 | 0.1546       | 0.0045       |
| RPL37     | -0.375366667 | -0.072266667 | 0.023366667  | -0.097633333 | -0.131466667 |
| KIAA1012  | -0.141066667 | -0.098933333 | 0.057333333  | 0.0271       | 0.048066667  |

|              |              |              |              |              |              |
|--------------|--------------|--------------|--------------|--------------|--------------|
| UBR3         | 0.070633333  | 0.0512       | -0.077433333 | 0.155833333  | 0.008666667  |
| TMEM205      | -0.5429      | -0.268933333 | 0.275466667  | -0.2963      | -0.055633333 |
| GCAT         | -0.125666667 | -0.0366      | -0.040233333 | -0.0835      | 0.0491       |
| KIF7         | -0.0353      | -0.0983      | 0.085166667  | -0.109333333 | 0.0742       |
| ARNTL        | -0.062633333 | -0.161066667 | -0.0105      | -0.274033333 | 0.081233333  |
| AAGAB        | 0.006966667  | -0.0286      | -0.1562      | 0.137966667  | -0.009033333 |
| NIPA2        | 0.128966667  | 0.028966667  | -0.261866667 | -0.011466667 | 0.059666667  |
| LOC100130446 | 0.0458       | -0.148666667 | -0.0291      | -0.0888      | 0.0617       |
| LOC644761    | 0.042733333  | -0.083633333 | -0.0907      | 0.026933333  | -0.0107      |
| GPRC5A       | 0.2993       | 0.232266667  | 0.3132       | 0.025866667  | 0.4553       |
| HIAT1        | -0.1243      | -0.045033333 | -0.0062      | -0.046866667 | 0.058766667  |
| MAP3K11      | 0.041566667  | -0.102       | 0.177633333  | 0.008266667  | 0.049933333  |
| C10orf57     | -0.216       | -0.0421      | -0.193233333 | -0.220033333 | 0.021866667  |
| CACYBP       | 0.2402       | 0.1291       | -0.067533333 | 0.227033333  | 0.122066667  |
| LOC286297    | -0.055133333 | -0.0189      | -0.173566667 | 0.069533333  | 0.044766667  |
| MED26        | 0.114166667  | 0.0034       | -0.028666667 | 0.2481       | -0.001933333 |
| TXNIP        | 0.025033333  | -1.041766667 | -1.144933333 | -0.063033333 | -0.671666667 |
| C14orf173    | -0.242733333 | -0.231233333 | 0.108966667  | -0.2786      | -0.032866667 |
| RPP40        | 0.053666667  | 0.011066667  | -0.288166667 | 0.0662       | -0.008466667 |
| MIS12        | 0.1012       | 0.015733333  | -0.1364      | 0.126        | 0.076766667  |
| LOC653450    | -0.0873      | -0.213633333 | 0.009366667  | 0.127666667  | -0.045066667 |
| AGPAT5       | 0.2219       | 0.054133333  | 0.048466667  | 0.119133333  | 0.158533333  |
| LOC401648    | -0.023       | -0.053033333 | -0.081266667 | 0.1152       | -0.004333333 |
| SLC35B1      | 0.0238       | -0.113233333 | -0.0153      | 0.0567       | 0.015433333  |
| SIRPA        | 0.042866667  | -0.1902      | 0.035666667  | -0.0653      | -0.060433333 |
| MTX1         | 0.028866667  | -0.0304      | 0.064566667  | 0.15         | 0.0867       |
| POLR3E       | 0.128533333  | 0.074833333  | -0.064266667 | 0.073266667  | 0.091166667  |
| SNAP29       | 0.001933333  | -0.0613      | -0.084466667 | 0.0938       | -0.0409      |
| C12orf76     | -0.3433      | -0.255       | -0.077766667 | -0.1384      | -0.172666667 |
| CDC25C       | -0.002233333 | 0.0213       | 0.107733333  | 0.079666667  | 0.118633333  |
| CCNE2        | 0.8225       | -0.0567      | 0.053        | 0.619666667  | 0.1489       |
| IFIT5        | 0.015666667  | -0.067766667 | 0.038766667  | 0.027533333  | -0.0536      |
| LOC100132346 | -0.129566667 | 0.5056       | -0.215633333 | -0.025366667 | 0.500466667  |
| KIAA0261     | 0.198233333  | 0.0334       | -0.022133333 | 0.258233333  | -0.056533333 |
| RP9P         | 0.0593       | -0.018533333 | 0.0075       | 0.084033333  | 0.116166667  |
| ATRX         | -0.209633333 | -0.180866667 | 0.156        | -0.014366667 | -0.0404      |
| FER          | 0.0115       | -0.0437      | 0.074966667  | 0.008733333  | 0.0808       |
| KIAA0232     | -0.2043      | -0.262166667 | -0.013466667 | -0.128433333 | -0.145566667 |
| ZBTB48       | -0.261166667 | -0.126166667 | 0.0343       | -0.158166667 | -0.003466667 |
| CREBZF       | 0.220966667  | 0.009033333  | -0.233133333 | 0.1677       | -0.001433333 |
| LOC729660    | -0.071966667 | -0.0826      | -0.142933333 | -0.032966667 | -0.011866667 |
| DNAJC14      | 0.0208       | -0.096566667 | -0.1786      | -0.050566667 | -0.027966667 |
| SUCLG2       | -0.0922      | -0.149       | 0.1638       | -0.062933333 | 0.0653       |
| FREQ         | 0.194666667  | 0.004066667  | -0.0916      | 0.171333333  | -0.005433333 |
| BAIAP2       | -0.067766667 | -0.269733333 | -0.095333333 | -0.178333333 | -0.090066667 |
| URG4         | 0.0509       | -0.180066667 | -0.0271      | 0.051833333  | 0.020133333  |
| LOC650496    | -0.216766667 | 0.177        | -0.133433333 | -0.109866667 | 0.2326       |



|              |              |              |              |              |              |
|--------------|--------------|--------------|--------------|--------------|--------------|
| CASP3        | 0.3249       | 0.1691       | -0.081033333 | 0.467466667  | -0.0289      |
| C14orf125    | -0.308333333 | -0.1326      | -0.016533333 | -0.218133333 | 0.011233333  |
| RMI1         | 0.321133333  | -0.0543      | -0.136633333 | 0.07         | 0.0742       |
| YAF2         | -0.145866667 | 0.064933333  | 0.0861       | 0.2455       | -0.030066667 |
| LOC151162    | -0.0255      | 0.148433333  | 0.355766667  | -0.084833333 | 0.227366667  |
| FABP6        | -0.0661      | -0.299166667 | 0.175166667  | -0.016166667 | -0.1197      |
| OSBP         | -0.111633333 | -0.050566667 | -0.108366667 | -0.078733333 | -0.047633333 |
| PRKCD        | -0.0754      | -0.0715      | 0.0437       | -0.205166667 | 0.020433333  |
| FAM65A       | 0.037466667  | -0.003       | -0.108933333 | -0.008333333 | 0.088866667  |
| LOC100132767 | -0.2958      | 0.007233333  | -0.063933333 | -0.084433333 | -0.0064      |
| NSMCE1       | -0.171333333 | -0.115266667 | 0.0474       | 0.0529       | -0.0439      |
| C9orf142     | 0.264433333  | -0.061666667 | -0.1817      | 0.1148       | 0.0971       |
| LOC285741    | -0.3327      | -0.100966667 | -0.0172      | -0.197933333 | -0.0662      |
| KIAA1468     | -0.046866667 | -0.0074      | -0.108366667 | 0.032033333  | -0.107533333 |
| DNAJC25      | 0.050266667  | 0.1307       | -0.241466667 | 0.088733333  | 0.0282       |
| PPA1         | 0.087        | -0.058133333 | -0.0737      | 0.127133333  | -0.007166667 |
| UROS         | -0.2721      | -0.119233333 | 0.230233333  | -0.128033333 | -0.0463      |
| MLST8        | -0.1514      | -0.142066667 | -0.1244      | 0.086566667  | -0.278166667 |
| SNORD31      | 0.332366667  | 0.096366667  | -0.036066667 | 0.288833333  | 0.001033333  |
| LOC100133045 | -0.095966667 | -0.099433333 | -0.0273      | -0.022566667 | -0.0403      |
| RCL1         | 0.4461       | 0.137733333  | -0.2808      | 0.413        | -0.017033333 |
| INHBE        | -0.116566667 | -0.244166667 | -0.0648      | -0.148833333 | -0.044266667 |
| PSMD4        | 0.0976       | 0.025666667  | -0.1963      | 0.113066667  | 0.0143       |
| HIATL2       | -0.087333333 | 0.6295       | -0.1409      | -0.016933333 | 0.226666667  |
| GPR180       | 0.011233333  | -0.3068      | 0.0381       | -0.055733333 | 0.053466667  |
| RNF181       | -0.390733333 | -0.252933333 | 0.133733333  | -0.1396      | -0.168833333 |
| LOC728723    | -0.163866667 | -0.119833333 | -0.134733333 | -0.1895      | 0.0057       |
| LOC100128899 | 0.074133333  | -0.075966667 | 0.119233333  | 0.139666667  | 0.280366667  |
| USP10        | 0.392        | 0.041466667  | 0.033533333  | 0.477        | 0.1007       |
| LOC100130835 | -0.0532      | 0.375966667  | -0.007733333 | 0.069966667  | 0.2353       |
| LOC653103    | -0.015466667 | 0.046933333  | -0.2025      | 0.069566667  | -0.0752      |
| XPR1         | -0.1023      | -0.032466667 | 0.043433333  | -0.055233333 | 0.0747       |
| GOT1         | -0.058566667 | -0.004566667 | -0.154066667 | -0.0046      | 0.029966667  |
| RNF14        | -0.2487      | -0.092066667 | -0.165266667 | -0.1262      | 0.009433333  |
| LOC442454    | -0.178733333 | -0.0508      | -0.0701      | -0.133033333 | 0.048833333  |
| SENPA8       | -0.2442      | -0.058233333 | -0.053933333 | -0.158633333 | 0.046133333  |
| ACCS         | -0.372733333 | -0.231333333 | 0.0095       | -0.3036      | -0.166733333 |
| TLL12        | 0.358166667  | 0.073666667  | -0.1177      | 0.2022       | 0.0394       |
| WT1          | 0.471133333  | -0.007433333 | -0.054533333 | 0.396566667  | 0.066633333  |
| NSF          | 0.1317       | -0.059466667 | -0.105166667 | 0.048066667  | -0.067266667 |
| LOC652541    | -0.280066667 | -0.116166667 | 0.099        | -0.212866667 | -0.024233333 |
| LOC100132918 | 0.266333333  | 0.143866667  | 0.0613       | 0.241233333  | 0.212766667  |
| ARAP1        | -0.171633333 | -0.003933333 | 0.067466667  | -0.076033333 | -0.0181      |
| LOC645904    | 0.000666667  | 0.0204       | -0.063966667 | -0.0034      | -0.024766667 |
| CSRP1        | -0.024633333 | -0.107066667 | -0.051166667 | -0.102133333 | -0.0954      |
| PPP1R15B     | -0.208866667 | 0.0315       | -0.2761      | -0.186666667 | -0.033633333 |
| ESCO2        | 0.116733333  | 0.194833333  | -0.105333333 | 0.107933333  | 0.205366667  |

|              |              |              |              |              |              |
|--------------|--------------|--------------|--------------|--------------|--------------|
| NLK          | -0.109733333 | 0.0286       | 0.1301       | 0.027533333  | 0.211333333  |
| CRKRS        | 0.115466667  | 0.0443       | -0.070966667 | 0.136333333  | -0.0167      |
| ATP5G3       | 0.0064       | 0.048666667  | -0.128333333 | 0.0219       | 0.0297       |
| PIN4         | -0.028566667 | 0.083033333  | -0.210033333 | 0.003133333  | 0.077        |
| GPN2         | -0.052266667 | -0.055766667 | 0.054566667  | -0.0271      | 0.002566667  |
| PPP1R7       | -0.1071      | -0.1662      | 0.0241       | -0.014233333 | -0.013533333 |
| FAM119B      | 0.019166667  | -0.309733333 | -0.0706      | 0.107333333  | -0.139333333 |
| LOC100130921 | 0.0218       | 0.1725       | -0.103033333 | 0.134266667  | 0.016566667  |
| SEMA4C       | 0.109733333  | -0.025733333 | 0.030866667  | 0.062533333  | 0.040266667  |
| APOO         | -0.113       | 0.059366667  | 0.023733333  | -0.0171      | 0.067166667  |
| STUB1        | -0.221266667 | -0.2886      | 0.133        | -0.349766667 | -0.086033333 |
| FHOD3        | 0.146166667  | 0.004033333  | -0.102066667 | 0.108533333  | 0.046466667  |
| LOC389895    | -0.033233333 | 0.070033333  | -0.0932      | -0.0686      | 0.070766667  |
| LARGE        | -0.0245      | -0.137533333 | -0.093166667 | -0.023533333 | -0.025733333 |
| ST7          | 0.009166667  | -0.0349      | -0.051733333 | 0.0672       | 0.002833333  |
| FER1L3       | 0.31         | -0.144233333 | -0.108933333 | 0.274066667  | -0.034366667 |
| SLC25A32     | 0.0639       | 0.074333333  | -0.096766667 | 0.014466667  | 0.145966667  |
| DOCK3        | -0.0966      | 0.1008       | -0.063733333 | 0.050766667  | -0.095066667 |
| LOC645086    | -0.0637      | 0.102833333  | -0.116166667 | -0.0391      | 0.184433333  |
| IFI44        | -0.160333333 | 0.030733333  | 0.037533333  | -0.039833333 | 0.023566667  |
| RDH11        | -0.113833333 | -0.171366667 | 0.0914       | -0.094833333 | 0.067666667  |
| TRNP1        | -0.2233      | 0.120966667  | 0.4864       | -0.177466667 | 0.297533333  |
| RAB10        | -0.115233333 | -0.159966667 | -0.106933333 | -0.1452      | 0.028566667  |
| LOC284230    | 0.001666667  | -0.017366667 | -0.046366667 | 0.018433333  | 0.027333333  |
| LOC402112    | 0.1939       | 0.054966667  | -0.073866667 | 0.2069       | 0.024033333  |
| EZR          | 0.2158       | 0.066233333  | -0.170566667 | 0.166933333  | 0.069833333  |
| LOC392301    | 0.125        | 0.1051       | -0.092933333 | 0.165533333  | 0.215466667  |
| FAM69A       | -0.0009      | 0.030333333  | -0.090266667 | -0.013666667 | 0.042233333  |
| MED17        | 0.005333333  | -0.091133333 | 0.026666667  | 0.131933333  | -0.006733333 |
| LOC652685    | 0.002166667  | -0.2507      | -0.088933333 | -0.147633333 | 0.010633333  |
| AIRE         | -0.1933      | 0.4254       | -0.167233333 | -0.068233333 | 0.138566667  |
| RBM28        | 0.240833333  | 0.078233333  | -0.078633333 | 0.281666667  | 0.024566667  |
| LOC644172    | -0.182       | 0.1063       | -0.140266667 | -0.0919      | 0.092933333  |
| LOC100131721 | -0.1138      | -0.2874      | 0.049933333  | -0.103933333 | -0.138366667 |
| NDUFS1       | -0.094766667 | -0.039433333 | -0.008066667 | -0.061666667 | 0.048166667  |
| TAF5         | 0.122766667  | 0.2065       | -0.013666667 | 0.304333333  | 0.1021       |
| GIT2         | 0.016066667  | -0.040066667 | -0.018133333 | -0.031       | 0.0353       |
| REXO4        | 0.390533333  | 0.054133333  | -0.133866667 | 0.290066667  | 0.0638       |
| SLC10A7      | -0.010133333 | 0.0624       | -0.023466667 | 0.123666667  | 0.027233333  |
| MMAA         | -0.011633333 | 0.038066667  | -0.1087      | -0.021533333 | 0.1298       |
| PHPT1        | -0.4064      | -0.2286      | 0.2385       | -0.196233333 | -0.0144      |
| LOC401076    | -0.182633333 | -0.022866667 | 0.085033333  | -0.021466667 | 0.041        |
| NRK          | 0.077333333  | 0.041066667  | -0.1223      | 0.160066667  | -0.003333333 |
| VIM          | 0.128466667  | -0.0309      | 0.095533333  | 0.249933333  | -0.019433333 |
| TIMELESS     | 0.221266667  | 0.003166667  | -0.024633333 | 0.1108       | 0.0844       |
| FAM92A1      | 0.0471       | -0.049433333 | -0.1419      | 0.035233333  | 0.053066667  |
| LOC643790    | 0.080666667  | -0.025233333 | 0.020166667  | 0.177133333  | -0.062933333 |

|           |              |              |              |              |              |
|-----------|--------------|--------------|--------------|--------------|--------------|
| DHX35     | 0.075066667  | 0.049133333  | -0.1352      | 0.116233333  | -0.0568      |
| SSX1      | 0.0426       | 0.1199       | -0.124966667 | 0.046233333  | 0.1647       |
| ITFG1     | -0.2167      | -0.117133333 | 0.0236       | -0.1387      | -0.082666667 |
| POLR3A    | -0.037033333 | 0.1873       | 0.039066667  | 0.0378       | 0.1883       |
| TDP1      | -0.062466667 | 0.246633333  | 0.031733333  | -0.0631      | 0.237166667  |
| SEC24A    | -0.076433333 | 0.019233333  | -0.036333333 | 0.006366667  | -0.056466667 |
| TRMT6     | -0.008866667 | 0.263233333  | -0.015166667 | 0.149266667  | 0.027733333  |
| KLHL26    | 0.0173       | -0.002966667 | -0.121933333 | 0.049866667  | 0.0565       |
| ZNF207    | 0.1376       | 0.078066667  | -0.064333333 | 0.1993       | 0.028566667  |
| ZNF804A   | 0.107433333  | -0.119233333 | 0.031433333  | 0.066766667  | 0.0453       |
| G3BP2     | 0.1735       | -0.3325      | 0.006466667  | 0.0917       | 0.079833333  |
| TMEM39B   | 0.124833333  | -0.036566667 | -0.091066667 | 0.094833333  | -0.036466667 |
| AZI1      | -0.0402      | 0.0037       | -0.054766667 | 0.019566667  | 0.013366667  |
| FUT11     | -0.049033333 | 0.030933333  | 0.2287       | 0.1025       | 0.078166667  |
| LOC91431  | -0.0159      | 0.086233333  | -0.094866667 | 0.0708       | -0.0082      |
| MAN2B2    | -0.121866667 | -0.178666667 | 0.065433333  | -0.038933333 | -0.054133333 |
| ATP2B1    | -0.159766667 | 0.0401       | 0.2055       | 0.003566667  | 0.1504       |
| FCF1      | -0.100633333 | 0.160666667  | -0.050333333 | 0.0118       | 0.2099       |
| NAF1      | 0.146333333  | -0.095566667 | 0.019133333  | 0.1925       | 0.0349       |
| RPS19BP1  | 0.166366667  | 0.151266667  | -0.0436      | 0.263933333  | 0.1246       |
| SFRS9     | -0.000866667 | 0.004666667  | 0.004433333  | 0.027566667  | 0.061433333  |
| LOC642909 | -0.2992      | 0.125566667  | -0.117466667 | -0.1788      | 0.126466667  |
| C10orf35  | 0.1504       | -0.0026      | -0.303566667 | 0.260066667  | 0.012        |
| KIF3C     | 0.0786       | -0.0337      | 0.1161       | 0.105933333  | 0.079966667  |
| LOC728772 | -0.011733333 | -0.050766667 | 0.087533333  | 0.121033333  | -0.059466667 |
| UVRAG     | 0.0616       | -0.019733333 | 0.111866667  | 0.165666667  | 0.0342       |
| HSPA8     | 0.3338       | -0.001666667 | 0.043633333  | 0.082733333  | 0.178766667  |
| FXC1      | 0.0575       | -0.068466667 | -0.0389      | 0.086166667  | -0.0198      |
| LOC399942 | 0.3364       | -0.205333333 | 0.017233333  | 0.1945       | 0.055933333  |
| RRP15     | 0.241333333  | 0.116466667  | -0.1548      | 0.2514       | 0.1539       |
| HNRNPM    | 0.191566667  | 0.050533333  | -0.081466667 | 0.201666667  | 0.015466667  |
| TARS2     | -0.270266667 | -0.064466667 | 0.154066667  | -0.023533333 | 0.064666667  |
| BHLHB2    | -0.280866667 | -0.356533333 | 0.613833333  | -0.116733333 | -0.1142      |
| ADSL      | 0.048766667  | 0.0302       | -0.033266667 | 0.089266667  | 0.088066667  |
| GABARAPL2 | -0.161633333 | 0.0261       | 0.1456       | 0.046333333  | 0.109866667  |
| SCARNA13  | -0.0558      | -0.0568      | 0.0195       | 0.183966667  | -0.021766667 |
| LOC646144 | 0.070266667  | -0.085133333 | 0.0062       | 0.0724       | 0.109366667  |
| AMZ2      | 0.031833333  | -0.005033333 | -0.242933333 | -0.137533333 | 0.102533333  |
| LOC650159 | -0.016333333 | -0.0257      | 0.153666667  | 0.059066667  | 0.083933333  |
| COPS3     | 0.138966667  | -0.0777      | 0.0065       | 0.1347       | -0.0423      |
| GAD1      | -0.051566667 | -0.022333333 | -0.138166667 | 0.015233333  | -0.0655      |
| ARMC9     | -0.0428      | -0.078633333 | 0.033333333  | -0.052366667 | 0.034633333  |
| SEC14L1   | 0.0164       | 0.0433       | 0.0831       | 0.052033333  | 0.080233333  |
| THOC7     | -0.056733333 | -0.051433333 | 0.018266667  | -3.33E-05    | 0.056766667  |
| PIP4K2B   | 0.123133333  | 0.017366667  | 0.007366667  | 0.074566667  | 0.0835       |
| IL13RA2   | -0.060966667 | -0.096066667 | 0.319733333  | -0.0627      | 0.094833333  |
| CCDC74B   | -0.221566667 | -0.121233333 | 0.142833333  | -0.038433333 | -0.1544      |

|              |              |              |              |              |              |
|--------------|--------------|--------------|--------------|--------------|--------------|
| LOC644254    | 0.280566667  | -0.108733333 | -0.080866667 | 0.154533333  | 0.042133333  |
| PRDX6        | 0.010733333  | -0.145066667 | -0.083966667 | 0.044966667  | -0.110233333 |
| FKBPL        | -0.0799      | 0.0313       | 0.0255       | 0.039        | 0.053766667  |
| GHR          | -0.143433333 | -0.019933333 | 0.108933333  | -0.1352      | 0.110366667  |
| LOC100129758 | 0.009533333  | -0.235       | 0.0127       | 0.0021       | 0.014333333  |
| MYO9B        | -0.107033333 | 0.058133333  | 0.0897       | 0.006166667  | 0.100666667  |
| ADM          | 0.5011       | 0.0164       | -0.1727      | 0.466266667  | -0.056133333 |
| ATP6V0A1     | -0.260766667 | -0.010666667 | 0.0978       | -0.2279      | 0.168        |
| PAFAH2       | -0.330633333 | -0.105866667 | -0.0392      | -0.148733333 | -0.127433333 |
| XPNPEP1      | -0.039033333 | -0.062733333 | -0.0458      | -0.0174      | -0.0173      |
| ARF3         | -0.069433333 | -0.036233333 | 0.010466667  | -0.077666667 | -0.0222      |
| HNRNPH1      | 0.195533333  | 0.0501       | 0.0562       | 0.2224       | 0.2064       |
| TCEB3        | 0.300333333  | 0.045666667  | -0.1271      | 0.196566667  | 0.214066667  |
| COX5A        | -0.098033333 | -0.052366667 | 0.028        | -0.036566667 | 0.011        |
| LOC400389    | -0.389166667 | -0.048766667 | -0.285266667 | -0.2163      | 0.0622       |
| LOC389834    | -0.1159      | -0.017733333 | 0.023433333  | 0.007966667  | 0.010833333  |
| LOC650111    | 0.091733333  | 0.028966667  | 0.094466667  | 0.1342       | -0.075433333 |
| LOC100134711 | 0.064166667  | 0.0408       | -0.0923      | 0.158866667  | 0.0329       |
| ZMYND12      | -0.042233333 | -0.0609      | -0.0297      | -0.0173      | -0.053233333 |
| TRA1P2       | -0.223966667 | 0.155766667  | -0.006633333 | -0.1555      | 0.1161       |
| ZNF23        | -0.169766667 | -0.0522      | -0.240233333 | -0.055566667 | -0.030066667 |
| GLT25D1      | 0.1811       | -0.0358      | -0.161266667 | 0.175533333  | -0.044433333 |
| LOC100132347 | -0.085466667 | 0.200133333  | -0.014433333 | 0.162266667  | 0.0419       |
| RAB36        | 0.115866667  | 0.087633333  | -0.135466667 | 0.1262       | -0.093333333 |
| XRCC6        | -0.0347      | 0.065566667  | 0.0457       | 0.070466667  | 0.106466667  |
| LOC285359    | 0.150033333  | 0.095966667  | -0.069666667 | 0.023066667  | 0.1715       |
| IRAK4        | -0.0527      | -0.0677      | -0.1783      | -0.0525      | -0.1757      |
| LOC652455    | -0.042766667 | -0.109766667 | -0.0499      | 0.094233333  | -0.168633333 |
| MIF          | -0.1292      | -0.152433333 | 0.0942       | -0.147366667 | -0.048466667 |
| XRCC2        | -0.263833333 | 0.642966667  | -0.070333333 | -0.1263      | 0.332233333  |
| DHRS1        | -0.384933333 | -0.078466667 | 0.182833333  | -0.263       | -0.042433333 |
| C12orf29     | -0.0087      | -0.085966667 | -0.003733333 | 0.019966667  | 0.058166667  |
| USP33        | -0.175866667 | -0.0947      | 0.176366667  | -0.040333333 | 0.0044       |
| STAG3L3      | -0.128866667 | 0.227033333  | -0.023266667 | -0.069933333 | 0.085933333  |
| LOC730744    | 0.1515       | 0.037233333  | -0.126733333 | 0.093633333  | 0.0422       |
| KIAA0831     | -0.224066667 | 0.0041       | -0.265333333 | -0.0584      | -0.115766667 |
| TGDS         | -0.059633333 | -0.162266667 | 0.032233333  | 0.0542       | -0.048066667 |
| LOC644265    | 0.108666667  | -0.120266667 | 0.143566667  | 0.2108       | -0.029066667 |
| HN1L         | 0.244133333  | 0.1953       | -0.1544      | 0.252633333  | 0.095466667  |
| NUDT2        | -0.119633333 | 0.041933333  | -0.147266667 | 0.029333333  | -0.0526      |
| LOC728362    | -0.195766667 | -0.029666667 | -0.048233333 | -0.192933333 | 0.051333333  |
| MAP2K4       | -0.018233333 | -0.113166667 | 0.042333333  | 0.080866667  | -0.056833333 |
| ZNF426       | -0.197333333 | 0.042666667  | -0.179733333 | -0.095566667 | -0.078866667 |
| FBXO31       | 0.1096       | -0.141266667 | 0.014366667  | 0.1407       | -0.029966667 |
| GFM1         | 0.0643       | -0.109       | -0.086633333 | 0.103066667  | 0.084066667  |
| ZFP36L2      | 0.739        | 0.028333333  | 0.311966667  | 0.6137       | 0.1991       |
| RBED1        | -0.024933333 | 0.160566667  | -0.394033333 | -0.159       | 0.030633333  |

|              |              |              |              |              |              |
|--------------|--------------|--------------|--------------|--------------|--------------|
| LYPLA2P1     | -0.0037      | -0.070433333 | 0.1719       | 0.0943       | 0.1212       |
| TBC1D25      | 0.0869       | -0.0937      | 0.033466667  | 0.0539       | 0.071266667  |
| CD9          | -0.144166667 | -0.042766667 | 0.000366667  | -0.058533333 | 0.0142       |
| C20orf191    | -0.186033333 | -0.149533333 | 0.115066667  | -0.040966667 | -0.060866667 |
| SEC11C       | -0.115533333 | -0.030266667 | -0.123433333 | 0.065866667  | -0.066333333 |
| CHST10       | 0.099566667  | 0.016166667  | 0.0025       | 0.152833333  | 0.0498       |
| FAM108B1     | -0.114033333 | 0.0593       | -0.0272      | 0.017233333  | -0.021766667 |
| ARSB         | 0.060033333  | -0.0296      | -0.1298      | -0.0531      | 0.098166667  |
| TMTC1        | -0.0864      | 0.024866667  | 0.048766667  | -0.126366667 | 0.057466667  |
| DLAT         | 0.195        | -0.1629      | 0.0828       | 0.161233333  | 0.134633333  |
| LOC196752    | -0.1273      | 0.015        | -0.101466667 | -0.168233333 | -0.0238      |
| CEP55        | 0.1103       | 0.049833333  | -0.088566667 | 0.097933333  | 0.037533333  |
| C10orf59     | 0.005133333  | -0.1049      | -0.069366667 | 0.0083       | -0.058366667 |
| IKZF2        | 0.0569       | 0.0203       | -0.069466667 | 0.2053       | 0.033666667  |
| CABIN1       | 0.027866667  | 0.019766667  | -0.041166667 | 0.194733333  | -0.096066667 |
| BUD31        | -0.061833333 | -0.073933333 | -0.0763      | 0.022066667  | -0.050033333 |
| UCHL5        | 0.190766667  | -0.040833333 | -0.0275      | 0.203566667  | -0.0442      |
| AFF3         | 0.041733333  | -0.0056      | -0.045466667 | -0.0379      | 0.171        |
| C14orf80     | 0.124666667  | 0.0785       | -0.253233333 | 0.110333333  | 0.035633333  |
| KIAA1274     | 0.046266667  | 0.072266667  | -0.021966667 | 0.104966667  | 0.033433333  |
| NBPF3        | 0.047        | -0.081833333 | 0.145533333  | 0.064        | -0.005233333 |
| TMEM128      | -0.2598      | -0.180833333 | -0.1937      | -0.1845      | -0.1153      |
| WDR57        | 0.353633333  | 0.0677       | -0.088833333 | 0.2589       | 0.0728       |
| CBLN3        | -0.106066667 | -0.1858      | 0.0193       | -0.040366667 | -0.019066667 |
| AASDH        | -0.281933333 | -0.054833333 | -0.114766667 | -0.157066667 | -0.081866667 |
| FLJ45032     | 0.050533333  | 0.026566667  | -0.0259      | 0.143866667  | 0.078633333  |
| EIF5A        | -0.0603      | 0.002166667  | 0.0307       | 0.081433333  | 0.0406       |
| C8orf33      | 0.545266667  | -0.096666667 | -0.033266667 | 0.4515       | 0.083233333  |
| MGC16703     | -0.1241      | 0.1999       | 0.006633333  | 0.090266667  | 0.146833333  |
| DGCR6L       | -0.211833333 | -0.200366667 | 0.132933333  | -0.063366667 | -0.0565      |
| RINT1        | 0.0803       | 0.142933333  | -0.061766667 | 0.2013       | 0.019733333  |
| HDAC2        | 0.166066667  | 0.0383       | 0.040166667  | 0.1809       | 0.039566667  |
| RIPK5        | -0.382233333 | -0.083233333 | 0.116533333  | -0.056233333 | -0.167833333 |
| KIAA1671     | -0.2409      | 0.052466667  | -0.145033333 | -0.1001      | -0.089466667 |
| DNM2         | 0.008366667  | -0.006933333 | -0.0416      | -0.066233333 | -0.023633333 |
| SNORD3D      | 0.031166667  | -0.0843      | -0.099333333 | 0.078366667  | 0.072566667  |
| EBF1         | -0.089866667 | -0.047066667 | 0.004366667  | -0.058633333 | -0.002       |
| LOC100133372 | 0.227433333  | -0.1547      | 0.056166667  | 0.128466667  | -0.000666667 |
| MED9         | 0.078833333  | 0.048266667  | 0.007833333  | 0.267166667  | 0.0121       |
| ASH2L        | 0.008166667  | -0.034566667 | 0.0166       | 0.053733333  | -0.057933333 |
| C17orf62     | -0.110433333 | -0.093033333 | -0.0526      | -0.123933333 | 0.021266667  |
| NCAPG        | 0.148866667  | 0.084966667  | -0.037166667 | 0.221        | -0.056866667 |
| LOC653105    | -0.251766667 | 0.049133333  | 0.094566667  | 0.080366667  | 0.056066667  |
| LOC650215    | 0.025533333  | -0.024966667 | -0.179866667 | 0.030766667  | -0.055533333 |
| TTC19        | 0.0232       | -0.263233333 | -0.089466667 | -0.120133333 | -0.074766667 |
| LOC652736    | -0.009233333 | -0.2002      | 0.014833333  | -0.053766667 | -0.109266667 |
| MCC          | -0.059266667 | -0.093733333 | 0.049566667  | 0.001466667  | -0.0318      |

|              |              |              |              |              |              |
|--------------|--------------|--------------|--------------|--------------|--------------|
| POLE4        | -0.032       | -0.0308      | -0.058033333 | 0.0466       | -0.0729      |
| AK5          | -0.003166667 | 0.142633333  | -0.047633333 | 0.007166667  | 0.229066667  |
| COX6C        | -0.077733333 | -0.143633333 | -0.1002      | -0.0297      | -0.106       |
| COPB1        | -0.047033333 | -0.1825      | -0.0099      | -0.062966667 | -0.083366667 |
| CES2         | -0.361266667 | -0.162066667 | 0.196133333  | -0.184066667 | -0.0724      |
| MMP14        | 0.0356       | -0.0651      | 0.021466667  | 0.078366667  | -0.004266667 |
| TULP4        | -0.0816      | -0.1983      | -0.0568      | -0.082233333 | -0.158733333 |
| TCTA         | -0.199466667 | -0.0293      | -0.0338      | -0.145333333 | 0.064866667  |
| DNA2         | 0.276733333  | 0.045366667  | -0.033833333 | 0.1689       | 0.163866667  |
| KIAA0427     | -0.115233333 | 0.039033333  | -0.118833333 | -0.0642      | 0.030733333  |
| ZNF830       | -0.147433333 | -0.065833333 | 0.0478       | 0.084833333  | -0.210466667 |
| LOC440280    | 0.1439       | -0.081433333 | -0.025433333 | 0.0439       | 0.0658       |
| S100PBP      | -0.056       | 0.108266667  | -0.002466667 | -0.066       | 0.1607       |
| MRPL11       | 0.141033333  | 0.042566667  | -0.123966667 | 0.1552       | 0.125866667  |
| LOC646200    | -0.0554      | -0.096166667 | 0.007766667  | 0.060833333  | -0.114166667 |
| RNF216       | -0.139333333 | -0.008       | -0.1053      | -0.072566667 | -0.0711      |
| CPPED1       | -0.100633333 | -0.004666667 | -0.0355      | -0.049833333 | 0.015866667  |
| EXOSC9       | 0.348166667  | 0.0348       | -0.0445      | 0.321433333  | -0.007433333 |
| LOC729519    | 0.043866667  | -0.044233333 | 0.067        | -0.002433333 | -0.053766667 |
| UGT2B17      | -0.044266667 | -0.005733333 | -0.0203      | 0.067        | -0.021033333 |
| FAM118A      | 0.0047       | -0.052533333 | 0.0584       | 0.128766667  | 0.029766667  |
| HIST2H2BE    | -0.415633333 | -0.130066667 | 0.2743       | -0.136066667 | 0.012566667  |
| ZNF700       | -0.052166667 | 0.026266667  | -0.041166667 | 0.014533333  | -0.114733333 |
| ZNF668       | 0.163233333  | 0.014033333  | -0.009333333 | 0.158733333  | 0.083233333  |
| AGXT2L2      | -0.167766667 | -0.179833333 | -0.060633333 | -0.275833333 | -0.0531      |
| SAR1B        | -0.015433333 | 0.133333333  | -0.0435      | 0.066733333  | 0.093833333  |
| GTF2A1       | 0.126133333  | -0.014       | 0.205333333  | 0.063466667  | -0.010433333 |
| LOC387703    | -0.055233333 | 0.0432       | 0.030333333  | 0.024033333  | 0.099833333  |
| CCDC101      | 0.067633333  | 0.026333333  | -0.128566667 | 0.07         | -0.0225      |
| BHLHB3       | -0.073933333 | -0.073533333 | -0.0052      | -0.0197      | 0.033833333  |
| WASH3P       | 0.029333333  | -0.105533333 | -0.121033333 | -0.060733333 | -0.097166667 |
| R3HDM1       | -0.1906      | 0.1904       | 0.003466667  | -0.121366667 | 0.275366667  |
| NFKBIZ       | 0.0369       | -0.2211      | 0.054433333  | -0.023066667 | -0.035166667 |
| LOC100132740 | 0.060733333  | -0.091233333 | -0.1006      | 0.002566667  | -0.053566667 |
| LOC647673    | -0.317533333 | -0.0619      | -0.102966667 | -0.101133333 | -0.149333333 |
| DNAJC8       | -0.011033333 | -0.051733333 | -0.0598      | -0.000866667 | 0.021366667  |
| RAF1         | 0.057333333  | -0.042933333 | -0.030566667 | 0.147133333  | -0.083833333 |
| GEMIN8       | -0.204366667 | -0.093433333 | 0.000166667  | -0.146466667 | 0.022366667  |
| DBNDD2       | 0.039566667  | -0.136733333 | -0.040466667 | -0.000966667 | -0.027766667 |
| PTRF         | 0.0917       | 0.010133333  | -0.008633333 | 0.101366667  | 0.141833333  |
| HEATR5B      | -0.143066667 | -0.1561      | 0.0587       | -0.049633333 | -0.091166667 |
| YES1         | 0.099366667  | -0.065166667 | 0.257933333  | -0.0101      | 0.3696       |
| PPIH         | 0.2509       | 0.0492       | -0.184466667 | 0.201466667  | 0.131033333  |
| PTPN11       | 0.161133333  | -0.1786      | 0.0973       | 0.138        | 0.1306       |
| SNX4         | 0.014033333  | -0.0419      | -0.082433333 | 0.092566667  | 0.030466667  |
| INTS9        | -0.238166667 | -0.000833333 | 0.0807       | -0.096333333 | 0.063466667  |
| C6orf203     | -0.236633333 | -0.021066667 | -0.0964      | -0.2013      | 0.077066667  |

|              |              |              |              |              |              |
|--------------|--------------|--------------|--------------|--------------|--------------|
| RNF138       | 0.199266667  | -0.1694      | -0.0085      | 0.094666667  | 0.115533333  |
| SAV1         | 0.2529       | 0.355033333  | 0.0223       | 0.634533333  | 0.0947       |
| TMEM50A      | -0.2079      | 0.0784       | 0.038466667  | 0.031633333  | 0.089933333  |
| LOC100133478 | -0.027966667 | -0.0652      | -0.075466667 | 0.101266667  | -0.054666667 |
| ACTR1A       | 0.073733333  | -0.090733333 | 0.044733333  | 0.063433333  | 0.116733333  |
| MAP3K3       | 0.077266667  | -0.2443      | 0.026333333  | -0.045133333 | -0.123666667 |
| LOC402116    | -0.024033333 | 0.085366667  | -0.078966667 | -0.006133333 | 0.1036       |
| ZNF585A      | -0.023933333 | 0.100933333  | -0.1098      | -0.129933333 | 0.179733333  |
| OSGEP        | 0.000733333  | 0.081866667  | -0.078366667 | 0.066166667  | 0.043433333  |
| SH3GLB1      | -0.0452      | 0.0282       | 0.011766667  | 0.120566667  | 0.005766667  |
| MX2          | -0.146266667 | -0.134133333 | 0.063833333  | -0.070333333 | 0.005033333  |
| STAG3L4      | 0.053033333  | -0.117233333 | -0.123633333 | -0.024466667 | 0.033866667  |
| PBX4         | -0.002033333 | 0.023833333  | -0.1272      | -0.004133333 | -0.028533333 |
| RFNG         | -0.304566667 | -0.1818      | 0.042033333  | -0.228733333 | -0.148033333 |
| EVC          | 0.201633333  | 0.002033333  | -0.155066667 | 0.107733333  | 0.044833333  |
| OAZ2         | 0.0221       | -0.206066667 | 0.151533333  | 0.290066667  | -0.178233333 |
| MXRA7        | -0.147833333 | -0.123566667 | 0.0314       | -0.158833333 | -0.085366667 |
| TAOK2        | 0.021533333  | -0.163066667 | 0.042566667  | 0.0165       | -0.0806      |
| THUMPD3      | -0.160833333 | 0.014133333  | -0.013166667 | -0.0838      | -0.026533333 |
| PPP2R3C      | -0.250266667 | -0.0041      | -0.099466667 | -0.0067      | 0.012233333  |
| HSDL1        | -0.055533333 | -0.141866667 | -0.1068      | -0.1259      | -0.113566667 |
| SLC33A1      | -0.2708      | -0.020166667 | -0.0247      | -0.218233333 | 0.0289       |
| CTU2         | -0.024633333 | 0.038833333  | -0.022033333 | -0.067633333 | 0.1196       |
| CDCA7L       | 0.041366667  | 0.0147       | -0.088966667 | 0.084733333  | -0.130033333 |
| QRFPR        | -0.125933333 | 0.626133333  | 0.0319       | 0.004233333  | 0.322966667  |
| C1orf203     | -0.1486      | -0.115333333 | -0.1674      | -0.0314      | -0.045466667 |
| ATP6V0B      | 0.062766667  | -0.072866667 | -0.078933333 | 0.0519       | -0.050933333 |
| PDZD8        | 0.280866667  | -0.062766667 | -0.0136      | 0.255833333  | 0.012        |
| CENPI        | 0.090033333  | -0.012533333 | -0.0965      | -0.050733333 | 0.088133333  |
| SRRM1L       | 0.255766667  | 0.1309       | -0.056133333 | 0.360566667  | -0.0545      |
| CCNDBP1      | -0.326533333 | -0.0752      | 0.0785       | -0.261       | -0.080166667 |
| TMEM132A     | -0.196666667 | -0.294133333 | 0.217333333  | 0.103266667  | -0.1943      |
| CUEDC2       | -0.3112      | -0.145033333 | 0.156733333  | -0.1304      | -0.0778      |
| WDR51A       | 0.1697       | 0.000733333  | -0.0979      | 0.0656       | 0.043466667  |
| DOT1L        | -0.063533333 | -0.080166667 | 0.227933333  | -0.0476      | 0.083333333  |
| ING3         | -0.041166667 | 0.106733333  | -0.1106      | 0.0693       | 0.1026       |
| LOC650737    | -0.2933      | -0.096766667 | 0.117533333  | -0.150233333 | 0.102533333  |
| TIPRL        | 0.049933333  | 0.169433333  | -0.035033333 | 0.067433333  | 0.2463       |
| ELK4         | 0.364466667  | 0.029266667  | -0.129633333 | 0.267533333  | 0.013366667  |
| BFAR         | -0.107533333 | -0.054133333 | -0.0454      | -0.024266667 | -0.018133333 |
| SNORD49A     | 0.083466667  | 0.143966667  | -0.237266667 | -0.0429      | 0.081666667  |
| WDR4         | 0.0907       | 0.058266667  | -0.0526      | 0.156766667  | 0.043133333  |
| LOC728965    | 0.0629       | 0.002933333  | -0.027666667 | 0.085966667  | 0.028733333  |
| HNRNPA3P1    | -0.021733333 | 0.007866667  | 0.138633333  | 0.111566667  | 0.141966667  |
| LOC100130550 | 0.034233333  | 0.262133333  | -0.010266667 | 0.120166667  | 0.152366667  |
| INO80C       | 0.305666667  | -0.031866667 | -0.077733333 | 0.139466667  | 0.114666667  |
| LIN9         | 0.2468       | 0.002966667  | 0.0517       | 0.2491       | 0.128033333  |

|           |              |              |              |              |              |
|-----------|--------------|--------------|--------------|--------------|--------------|
| LOC728620 | -0.002966667 | 0.4647       | -0.095233333 | 0.1414       | 0.213466667  |
| UQCR      | 0.093433333  | -0.104833333 | -0.065633333 | 0.114166667  | -0.0333      |
| EIF2S1    | 0.114633333  | 0.080766667  | -0.203433333 | 0.089666667  | 0.011466667  |
| LOC730020 | 0.206233333  | -0.086066667 | -0.158566667 | 0.235666667  | 0.000366667  |
| TCF19     | 0.177133333  | 0.005        | -0.255666667 | 0.0569       | -0.076566667 |
| C16orf72  | -0.2045      | 0.173366667  | -0.1211      | -0.110733333 | -0.017366667 |
| LOC647856 | -0.1175      | 0.0739       | -0.082133333 | -0.029833333 | 0.109866667  |
| CWC15     | 0.090666667  | 0.0566       | -0.0773      | 0.0809       | 0.0637       |
| CCBL1     | -0.121466667 | 0.006933333  | 0.125133333  | 0.0706       | 0.002033333  |
| LOC643509 | -0.0171      | 0.312733333  | -0.032266667 | 0.014966667  | 0.1123       |
| RPS3A     | -0.177133333 | -0.0166      | 0.057266667  | 0.043        | -0.076066667 |
| GORASP2   | 0.1027       | 0.041233333  | 0.113666667  | 0.248833333  | 0.008866667  |
| LOC642678 | -0.097666667 | -0.280866667 | 0.149733333  | -0.1707      | -0.133166667 |
| NDUFA4    | -0.060966667 | -0.187533333 | 0.046833333  | 0.078233333  | -0.050566667 |
| NOP16     | 0.437933333  | 0.281266667  | -0.1373      | 0.393933333  | 0.319566667  |
| HLA-G     | -0.049433333 | -0.101433333 | 0.003166667  | -0.059233333 | -0.0387      |
| PLSCR3    | -0.204033333 | -0.1095      | 0.1491       | -0.0758      | 0.010533333  |
| OMA1      | -0.512966667 | -0.0015      | -0.193366667 | -0.458366667 | 0.067633333  |
| USP4      | -0.218333333 | 0.0351       | -0.0367      | -0.0861      | 0.033766667  |
| GCC2      | -0.166266667 | -0.064166667 | 0.0488       | -0.0236      | -0.054666667 |
| AGPAT9    | -0.255433333 | -0.1526      | -0.0346      | -0.291966667 | -0.0355      |
| C17orf56  | -0.090533333 | 0.003933333  | -0.097766667 | -0.034133333 | 0.013366667  |
| TNFAIP8   | -0.0001      | -0.032933333 | -0.004533333 | -0.1219      | 0.102266667  |
| TRIM73    | -0.0583      | -0.118866667 | 0.035866667  | 0.0939       | -0.1401      |
| PLAGL2    | 0.249233333  | -0.026266667 | 0.073366667  | 0.297966667  | -0.071866667 |
| HDAC7A    | 0.105066667  | 0.0709       | 0.043966667  | 0.164133333  | 0.066866667  |
| C12orf60  | -0.168966667 | -0.0033      | -0.0321      | -0.076266667 | -0.0104      |
| CEP120    | 0.139533333  | 0.009766667  | -0.159866667 | 0.065833333  | -0.096666667 |
| MCOLN1    | 0.076766667  | -0.0477      | -0.179366667 | -0.049533333 | -0.032333333 |
| PSMD1     | 0.1096       | -0.040666667 | -0.012233333 | 0.061166667  | 0.0408       |
| OVGP1     | 0.072733333  | -0.1686      | -0.0476      | -0.117133333 | 0.024466667  |
| PNPLA2    | -0.0437      | -0.148033333 | 0.0449       | 0.0744       | -0.0795      |
| LOC345041 | 0.0275       | 0.301233333  | -0.2663      | 0.141433333  | 0.1045       |
| MFSD5     | 0.0403       | -0.0514      | -0.172666667 | 0.111333333  | -0.1794      |
| XKR8      | 0.0396       | -0.017533333 | -0.035733333 | 0.091733333  | -0.0154      |
| G3BP1     | 0.365266667  | 0.190033333  | 0.0454       | 0.297766667  | 0.1531       |
| TPT1      | -0.1493      | -0.275166667 | 0.200466667  | -0.050066667 | -0.216233333 |
| LOC653346 | 0.086166667  | -0.048866667 | -0.0738      | 0.074066667  | -0.053033333 |
| FAM190B   | 0.042733333  | -0.0332      | -0.009733333 | 0.129666667  | -0.0225      |
| HIGD1A    | -0.141433333 | -0.093933333 | -0.067466667 | -0.103566667 | 0.0037       |
| LOC652470 | -0.0293      | -0.0453      | 0.003666667  | 0.074933333  | -0.0763      |
| IK        | -0.034466667 | -0.021933333 | 0.063866667  | -0.006966667 | -0.069933333 |
| HNRPK     | 0.369466667  | -0.109266667 | 0.071266667  | 0.308266667  | 0.037566667  |
| CCDC24    | -0.4569      | -0.2408      | 0.144966667  | -0.4074      | -0.021433333 |
| EEF1A1    | -0.166       | -0.1953      | -0.288633333 | -0.023666667 | -0.213433333 |
| C2orf25   | 0.0934       | -0.054033333 | -0.0432      | 0.026966667  | -0.0417      |
| CBX6      | -0.0108      | -0.052033333 | -0.0748      | -0.102433333 | 0.017433333  |



|              |              |              |              |              |              |
|--------------|--------------|--------------|--------------|--------------|--------------|
| GPR89C       | 0.270766667  | -0.0545      | -0.0766      | 0.161866667  | 0.065633333  |
| LOC100132299 | 0.199333333  | 0.1312       | -0.078966667 | 0.189166667  | 0.0199       |
| TRAIP        | 0.2191       | 0.0727       | -0.095233333 | 0.183733333  | -0.048933333 |
| NDUFB8       | -0.1142      | -0.191733333 | 0.084166667  | -0.026033333 | -0.021066667 |
| MGAT4B       | -0.112266667 | -0.079366667 | 0.008566667  | 0.014666667  | -0.000833333 |
| LIME1        | 0.0059       | -0.0038      | 0.0017       | 0.148733333  | -0.015433333 |
| LOC284167    | -0.0157      | -0.075666667 | 0.052433333  | -0.0729      | 0.0423       |
| SMARCD2      | 0.042966667  | -0.100166667 | 0.054033333  | 0.040466667  | 0.0882       |
| C19orf6      | 0.2762       | 0.0481       | 0.013833333  | 0.312833333  | -0.009366667 |
| PHLDB3       | 0.132433333  | -0.1262      | -0.111633333 | 0.138866667  | -0.2049      |
| CCBL2        | -0.122366667 | -0.041633333 | -0.1337      | -0.085933333 | 0.1302       |
| TNPO2        | 0.163366667  | 0.018066667  | 0.091833333  | 0.297        | -0.041333333 |
| LOC729941    | 0.000533333  | -0.086033333 | -0.093033333 | -0.0155      | -0.0232      |
| CTGLF3       | 0.2025       | 0.0586       | -0.209266667 | -0.0449      | -0.0492      |
| PCTP         | -0.158366667 | -0.108833333 | -0.1646      | -0.091033333 | -0.112166667 |
| MOBKL1B      | 0.034733333  | 0.0276       | 0.1127       | 0.033133333  | 0.102533333  |
| SHB          | 0.085266667  | -0.0948      | 0.216933333  | 0.0748       | 0.090966667  |
| LOC645159    | -0.059433333 | -0.1378      | 0.047533333  | -0.017966667 | -0.117866667 |
| ADH5         | 0.084266667  | -0.032066667 | -0.0403      | 0.0182       | 0.112533333  |
| MYBBP1A      | 0.237333333  | 0.089233333  | -0.065133333 | 0.144233333  | 0.051366667  |
| CAMSAP1      | 0.250666667  | 0.096333333  | 0.012133333  | 0.3273       | 0.118566667  |
| FAM178B      | 0.018366667  | 0.019733333  | -0.068633333 | 0.080566667  | -0.013933333 |
| LOC731231    | 0.0112       | 0.000133333  | -0.116633333 | 0.100633333  | -0.1347      |
| CDKN2AIPNL   | -0.1384      | 0.507233333  | 0.0283       | -0.082966667 | 0.2577       |
| PCNXL2       | -0.135766667 | -0.041533333 | -0.055166667 | -0.066466667 | -0.023366667 |
| NAT5         | 0.150633333  | 0.0168       | -0.013766667 | 0.193        | 0.018966667  |
| LOC390354    | -0.042133333 | -0.054233333 | -0.032366667 | -0.057466667 | 0.0358       |
| C1orf91      | -0.144066667 | -0.074166667 | 0.012466667  | 0.046233333  | -0.077733333 |
| DCTN4        | -0.252233333 | -0.070566667 | -0.159266667 | -0.211466667 | 0.068566667  |
| HTR7         | 0.0164       | 0.004733333  | 0.141833333  | -0.062266667 | 0.0017       |
| DDX19-DDX19L | -0.007733333 | 0.087033333  | -0.070033333 | 0.0883       | -0.055833333 |
| LOC642780    | 0.026333333  | -0.153333333 | -0.063333333 | -0.060466667 | -0.005933333 |
| ANXA5        | 0.015133333  | -0.1775      | 0.039833333  | 0.006833333  | -0.073733333 |
| C11orf54     | -0.253333333 | -0.193733333 | 0.062966667  | -0.3282      | 0.095        |
| GMPPB        | -0.089566667 | 0.110133333  | -0.0032      | 0.068733333  | 0.122933333  |
| FAU          | -0.034466667 | -0.0399      | -0.008233333 | -0.035133333 | 0.047266667  |
| OPN3         | 0.3608       | -0.002233333 | 0.094033333  | 0.3574       | 0.132966667  |
| LOC642947    | -0.214633333 | 0.3535       | -0.007933333 | -0.1027      | 0.113033333  |
| LOC391126    | 0.015966667  | -0.0196      | -0.007433333 | 0.019266667  | 0.0021       |
| EHD1         | 0.3592       | 0.111166667  | 0.024633333  | 0.371266667  | 0.09         |
| C14orf37     | -0.019566667 | -0.002133333 | -0.032866667 | 0.003333333  | 0.036266667  |
| EIF2B3       | -0.1041      | 0.084433333  | 0.130066667  | 0.044733333  | 0.1842       |
| PRICKLE4     | 0.2238       | -0.027033333 | -0.025633333 | 0.250533333  | 0.052        |
| ACOT8        | -0.2434      | -0.017433333 | 0.171866667  | -0.074333333 | 0.057266667  |
| LLPH         | 0.0521       | 0.176666667  | -0.226133333 | 0.026633333  | 0.1639       |
| ALDH1A1      | -0.023233333 | -0.045       | 0.0475       | -0.039766667 | 0.090566667  |
| PARS2        | -0.0287      | -0.242233333 | -0.069333333 | -0.148266667 | 0.020566667  |

|              |              |              |              |              |              |
|--------------|--------------|--------------|--------------|--------------|--------------|
| CDKN2A       | 0.0148       | -0.0356      | 0.031166667  | 0.092433333  | 0.0284       |
| RALY         | 0.3705       | -0.118833333 | -0.058966667 | 0.083366667  | 0.225466667  |
| LOC158345    | -0.161966667 | -0.0254      | -0.108466667 | -0.1828      | 0.0311       |
| ECGF1        | -0.0785      | -0.0178      | -0.080733333 | -0.012333333 | -0.003366667 |
| C1orf159     | 0.114466667  | -0.014533333 | 0.046566667  | 0.137433333  | 0.069466667  |
| BAZ1B        | 0.0937       | 0.045366667  | 0.036666667  | 0.1354       | -0.009133333 |
| CDCA8        | 0.3327       | 0.163633333  | -0.184933333 | 0.377666667  | -0.088766667 |
| LOC100132715 | 0.110333333  | 0.113533333  | -0.0625      | 0.193433333  | 0.133333333  |
| FARSA        | 0.188433333  | -0.049366667 | -0.0091      | 0.1128       | 0.128533333  |
| AVL9         | -0.072333333 | -0.0123      | 0.0077       | 0.0665       | -0.004666667 |
| PACS1        | -0.0746      | -0.064733333 | 0.0573       | -0.024133333 | -0.0411      |
| SYS1         | 0.135        | -0.0958      | -0.152133333 | 0.112566667  | -0.0705      |
| RBM18        | 0.1428       | 0.096166667  | -0.1851      | 0.012566667  | 0.119466667  |
| NDUFAF2      | 0.1305       | -0.094433333 | -0.073533333 | 0.042166667  | 0.0527       |
| TTC8         | -7.00E-04    | 0.175666667  | -0.030366667 | 0.1245       | -0.012866667 |
| WSB1         | -0.265466667 | -0.0385      | 0.227533333  | -0.0564      | 0.204266667  |
| LOC100132795 | -0.121966667 | -0.194166667 | 0.054333333  | -0.078333333 | -0.1512      |
| HMGN1        | 0.052633333  | 0.065966667  | -0.108833333 | 0.007766667  | 0.057566667  |
| LOC653972    | 0.017933333  | 0.066966667  | 0.1724       | 0.126        | 0.061366667  |
| HEY1         | -0.2919      | -0.095333333 | 0.114533333  | -0.201333333 | 0.016        |
| CRLF3        | 0.279833333  | 0.088233333  | -0.0828      | 0.201733333  | 0.119333333  |
| EIF3F        | -0.075733333 | -0.171533333 | -0.148166667 | -0.001366667 | -0.0866      |
| TSEN2        | 0.2117       | 0.099633333  | -0.178933333 | -0.036133333 | 0.155833333  |
| PPM1K        | -0.176266667 | 0.627633333  | 0.002666667  | 0.043166667  | 0.341266667  |
| ZNF644       | -0.178133333 | -0.313633333 | -0.013466667 | -0.227333333 | -0.0166      |
| ZDHHC13      | -0.0423      | -0.058233333 | -0.0265      | -0.1211      | -0.054433333 |
| LYPD6        | 0.0377       | 0.001966667  | 0.086        | 0.215366667  | 0.016633333  |
| C8orf45      | -0.3109      | 0.6198       | -0.1962      | -0.161566667 | 0.200666667  |
| ZNF664       | 0.173666667  | -0.0073      | -0.0481      | 0.130766667  | 0.058133333  |
| STK10        | 0.002866667  | 0.034866667  | 0.145233333  | 0.089        | 0.1247       |
| ATL3         | 0.2472       | -0.023566667 | -0.080766667 | 0.168266667  | 0.044966667  |
| LOC400963    | 0.0297       | -0.0989      | 0.0209       | 0.003733333  | 0.059933333  |
| C6orf160     | -0.336133333 | -0.1478      | -0.139766667 | -0.188766667 | -0.166066667 |
| SEH1L        | 0.363533333  | 0.0315       | -0.005233333 | 0.274533333  | 0.142433333  |
| MOCS3        | 0.1037       | 0.1126       | -0.113633333 | 0.0802       | 0.140233333  |
| MRPL39       | 0.220866667  | 0.0743       | -0.0988      | 0.216666667  | 0.031833333  |
| LOC728908    | 0.158533333  | 0.0462       | -0.1         | 0.161        | 0.049933333  |
| IL15         | -0.157833333 | -0.098666667 | -0.0598      | -0.1137      | 0.018166667  |
| PPFIBP2      | -0.0494      | -0.0472      | -0.0564      | -0.0698      | -0.012666667 |
| CCNY         | 0.025466667  | -0.186766667 | -0.094233333 | 0.0105       | -0.020966667 |
| RPS6KA1      | 0.093033333  | -0.016666667 | -0.009366667 | 0.040966667  | 0.061133333  |
| LGALS9B      | -0.0256      | 0.034033333  | 0.035966667  | 0.067366667  | 0.137733333  |
| LEPROT       | 0.039533333  | -0.2475      | 0.133833333  | 0.065333333  | 0.045166667  |
| WDR76        | 0.152433333  | 0.135266667  | -0.0719      | 0.1368       | 0.174566667  |
| NGFR         | 0.001        | 0.1301       | -0.0404      | 0.0282       | 0.041433333  |
| PIGP         | -0.212433333 | -0.101766667 | 0.027933333  | -0.107       | -0.033366667 |
| ERO1L        | 0.0219       | -0.006933333 | -0.0242      | 0.022633333  | 0.002866667  |

|              |              |              |              |              |              |
|--------------|--------------|--------------|--------------|--------------|--------------|
| LGMN         | -0.103066667 | 0.028966667  | -0.182966667 | 0.002233333  | -0.0497      |
| TYW1B        | -0.0472      | 0.075566667  | -0.0815      | 0.058666667  | 0.0135       |
| RFWD2        | -0.111633333 | 0.0332       | -0.114033333 | -0.117133333 | 0.020666667  |
| CHMP1B       | -0.104133333 | -0.215866667 | -0.0356      | -0.073766667 | -0.1034      |
| COX15        | -0.057666667 | -0.223366667 | -0.019533333 | -0.138666667 | -0.0382      |
| NEK1         | -0.2654      | -0.0019      | -0.0371      | -0.127766667 | 0.0367       |
| LRRCC1       | -0.109466667 | -0.055233333 | 0.102966667  | -0.000366667 | 0.055033333  |
| ZKSCAN5      | -0.015466667 | 0.0068       | -0.006933333 | -0.030733333 | 0.048333333  |
| CUL2         | -0.115633333 | 0.158766667  | -0.017166667 | -0.015266667 | 0.091        |
| CDKN2B       | -0.072433333 | 0.049666667  | 0.088266667  | -0.017966667 | 0.032        |
| NOL11        | 0.118266667  | 0.072066667  | 0.002266667  | 0.180933333  | 0.094033333  |
| LOC653505    | -0.030933333 | -0.059866667 | 0.072566667  | 0.0376       | -0.092133333 |
| FCGR3B       | 0.076833333  | 0.002566667  | -0.153       | 0.031166667  | 0.004533333  |
| RBM12        | 0.519133333  | 0.0237       | -0.220166667 | 0.401933333  | -0.061433333 |
| C12orf23     | -0.334766667 | 0.0344       | 0.036666667  | -0.255166667 | 0.151        |
| SUMF1        | -0.315       | -0.089833333 | -0.073933333 | -0.2229      | -0.081433333 |
| ATL2         | 0.266533333  | 0.066233333  | -0.094033333 | 0.2413       | 0.023866667  |
| AP1G1        | 0.100966667  | 0.1387       | -0.193033333 | 0.222133333  | -0.087366667 |
| SNRNP40      | 0.180433333  | 0.031333333  | -0.063233333 | 0.1373       | 0.0639       |
| PTDSS1       | 0.327133333  | -0.0731      | -0.122533333 | 0.216233333  | -0.060533333 |
| GGPS1        | -0.224766667 | -0.0945      | 0.0317       | -0.152966667 | -0.062766667 |
| MRPL12       | 0.138        | -0.016333333 | 0.091533333  | 0.133233333  | 0.152        |
| YIPF1        | -0.258066667 | -0.174566667 | 0.041533333  | -0.1778      | -0.173566667 |
| ATAD2        | 0.334866667  | 0.1158       | -0.145866667 | 0.3173       | -0.081333333 |
| RPUSD3       | -0.092266667 | -0.133133333 | 0.071666667  | -0.073933333 | 0.001066667  |
| LOC100132032 | 0.077266667  | 0.046566667  | 0.039166667  | 0.057533333  | 0.0564       |
| RBBP4        | 0.283566667  | 0.0075       | 0.039766667  | 0.177166667  | 0.0347       |
| RPL39        | 0.032033333  | -0.096433333 | -0.017466667 | 0.002866667  | 0.053233333  |
| MED7         | -0.212       | -0.062166667 | 0.026766667  | -0.1136      | 0.034033333  |
| PDGFRB       | -0.6191      | -0.2792      | 0.189933333  | -0.4781      | -0.1065      |
| CDK9         | 0.072066667  | -0.1465      | -0.004066667 | 0.003133333  | 0.0268       |
| KIAA0776     | -0.003833333 | -0.188766667 | -0.032166667 | -0.0096      | 0.079133333  |
| PDCD6IP      | -0.245033333 | -0.241333333 | 0.170433333  | -0.142466667 | -0.086033333 |
| LOC100133797 | 0.124266667  | 0.029066667  | 0.163        | 0.049266667  | 0.097833333  |
| SPRED2       | 0.044966667  | -0.049933333 | 0.128366667  | 0.046        | 0.085866667  |
| LOC729148    | 0.111566667  | -0.056366667 | 0.035466667  | 0.2056       | 0.022533333  |
| C20orf7      | -0.009366667 | 0.060833333  | -0.0929      | 0.026266667  | 0.0414       |
| CICK0721Q.1  | -0.384366667 | 0.0857       | -0.344633333 | -0.246566667 | 0.0765       |
| SILV         | 0.013066667  | -0.086633333 | 0.0301       | -0.0251      | -0.016066667 |
| BMS1P5       | -0.1601      | 0.544833333  | -0.0381      | -0.106366667 | 0.269866667  |
| TRIP13       | 0.164866667  | 0.000833333  | -0.131633333 | 0.123633333  | -0.0491      |
| KIAA1430     | 0.0093       | -0.036066667 | -0.006566667 | -0.049066667 | 0.0499       |
| STARD13      | 0.052833333  | -0.161933333 | -0.0168      | 0.115466667  | -0.1736      |
| TMEM171      | 0.5715       | 0.259366667  | -0.1474      | 0.3953       | 0.319033333  |
| FLVCR2       | -0.063766667 | -0.2087      | -0.034233333 | -0.0725      | -0.040733333 |
| NPY5R        | -0.062066667 | -0.027266667 | -0.1101      | 0.024766667  | -0.214333333 |
| CDCA5        | 0.360433333  | 0.1331       | -0.1484      | 0.338233333  | -0.04        |

|              |              |              |              |              |              |
|--------------|--------------|--------------|--------------|--------------|--------------|
| IFFO2        | 0.265933333  | -0.049266667 | 0.1281       | 0.240933333  | 0.157333333  |
| CCDC109A     | 0.035133333  | 0.047        | -0.0619      | 0.0359       | 0.1534       |
| WDR73        | 0.027066667  | -0.187833333 | -0.1051      | 0.0725       | -0.074533333 |
| LOC100128469 | 0.0081       | -0.052866667 | 0.032966667  | 0.1361       | 0.087066667  |
| LOC729123    | 0.1327       | -0.0257      | -0.0358      | 0.170266667  | 0.027366667  |
| GORASP1      | -0.065533333 | -0.1452      | -0.075966667 | 0.025166667  | -0.153666667 |
| PPP1R3D      | -0.132533333 | 0.013166667  | 0.040233333  | -0.0167      | -0.001966667 |
| ZNF74        | 0.0541       | 0.032333333  | -0.009033333 | 0.0933       | 0.032233333  |
| EGFLAM       | 0.011        | -0.091       | 0.0271       | -0.004766667 | 0.105666667  |
| FLJ90086     | -0.0352      | -0.002166667 | -0.044133333 | 0.062        | -0.0482      |
| PTGR2        | -0.276566667 | 1.0302       | -0.368666667 | -0.2996      | 0.605        |
| CLP1         | 0.1915       | 0.104433333  | -0.1026      | 0.2232       | 0.112433333  |
| LOC100129022 | -0.132833333 | 0.0867       | -0.148933333 | 0.0195       | -0.125066667 |
| COL4A5       | -0.218333333 | -0.160533333 | 0.225566667  | -0.1436      | -0.080233333 |
| CAMKK2       | 0.208133333  | -0.097433333 | -0.002       | 0.092533333  | 0.198233333  |
| DUSP2        | 0.381566667  | 0.025333333  | 0.007666667  | 0.382666667  | 0.019733333  |
| LOC100132761 | 0.212133333  | -0.012866667 | -0.0837      | -0.0508      | 0.281133333  |
| GMEB1        | 0.065        | 0.0883       | -0.034333333 | 0.2033       | 0.125166667  |
| LOC100129890 | -0.1533      | -0.127733333 | -0.0856      | -0.082333333 | -0.0692      |
| TRIP10       | 0.0234       | -0.078766667 | 0.103133333  | 0.107966667  | -0.003566667 |
| RPS14        | -0.1004      | -0.1219      | 0.0667       | -0.027566667 | -0.090133333 |
| HLA-A29.1    | -0.0047      | -0.269966667 | 0.066766667  | -0.003766667 | -0.080233333 |
| LEAP2        | 0.2638       | 0.1172       | -0.078966667 | 0.265733333  | 0.1243       |
| HSPBL2       | -0.236933333 | -0.092066667 | 0.227866667  | -0.156033333 | 0.097566667  |
| CEP57        | -0.347066667 | -0.171266667 | -0.136666667 | -0.202       | -0.087533333 |
| DDX5         | 0.121666667  | -0.117833333 | 0.059133333  | 0.206166667  | -0.119233333 |
| LOC645317    | 0.033033333  | 0.165933333  | -0.0639      | 0.1673       | 0.1298       |
| TPP1         | -0.225533333 | -0.2433      | 0.117566667  | -0.204133333 | -0.187166667 |
| LOC652607    | -0.344       | 0.178633333  | -0.4689      | -0.289       | 0.228566667  |
| LPCAT1       | 0.0751       | -0.088133333 | 0.043633333  | 0.0402       | -0.040933333 |
| CYTSA        | 0.214133333  | -0.061833333 | -0.064733333 | 0.088233333  | -0.0443      |
| FZD3         | -0.0659      | -0.027266667 | -0.120233333 | -0.027533333 | -0.080433333 |
| DUS1L        | 0.085766667  | -0.0246      | -0.120033333 | 0.108366667  | -0.065366667 |
| BEX1         | -0.176766667 | -0.112166667 | 0.0648       | -0.185566667 | -0.074866667 |
| YWHAE        | -0.006       | 0.020733333  | 0.102533333  | -0.0155      | 0.120166667  |
| PAPSS1       | -0.3082      | -0.0153      | -0.031366667 | -0.180566667 | -0.0142      |
| RPL3         | -0.143       | -0.127066667 | -0.0172      | -0.1859      | -0.017533333 |
| BZW1         | 0.0811       | 0.167233333  | -0.058866667 | 0.302466667  | 0.1444       |
| AUP1         | 0.0999       | 0.287366667  | -0.109866667 | 0.148733333  | 0.0869       |
| SLC35B2      | -0.040433333 | -0.1771      | -0.022166667 | -0.075133333 | -0.0408      |
| SCO2         | 0.164166667  | -0.0257      | -0.150333333 | 0.101133333  | 0.054333333  |
| SPINK1       | -0.0378      | -0.053566667 | -0.019533333 | 0.001766667  | -0.004566667 |
| PDK2         | -0.132       | -0.128966667 | 0.033533333  | 0.055566667  | -0.0963      |
| EXOSC10      | 0.185266667  | 0.055766667  | -0.248633333 | 0.0647       | 0.150633333  |
| ZNF85        | 0.031266667  | 0.159033333  | -0.078733333 | 0.088966667  | 0.1926       |
| CYP20A1      | -0.102666667 | 0.080433333  | -0.103433333 | -0.0233      | 0.044433333  |
| PRDX4        | 0.128366667  | -0.000266667 | -0.085833333 | 0.157366667  | 0.002633333  |

|              |              |              |              |              |              |
|--------------|--------------|--------------|--------------|--------------|--------------|
| NOMO2        | -0.022133333 | -0.140266667 | -0.007666667 | -0.019233333 | -0.063866667 |
| GGTL3        | -0.2543      | 0.092433333  | 0.035366667  | 0.037566667  | 0.058566667  |
| ZMAT2        | -0.145366667 | 0.040533333  | -0.102066667 | 0.051233333  | -0.018366667 |
| MGC71993     | -0.316133333 | -0.149233333 | 0.182633333  | -0.1832      | -0.0945      |
| FOXC1        | 0.036433333  | -0.1649      | -0.1505      | 0.036066667  | -0.087233333 |
| RFX1         | -0.1749      | -0.090666667 | 0.0922       | 0.0456       | -0.042733333 |
| TSN          | 0.035666667  | 0.063533333  | -0.0953      | 0.0284       | 0.0971       |
| FH           | 0.111        | -0.0418      | -0.021533333 | 0.145233333  | 0.061733333  |
| C7orf58      | -0.046633333 | -0.021       | 0.008633333  | -0.003766667 | 0.0338       |
| DSCR3        | -0.038033333 | -0.024566667 | -0.010466667 | -0.014533333 | -0.1228      |
| GPX1         | -0.182666667 | -0.014266667 | -0.0118      | -0.017333333 | -0.039133333 |
| C11orf31     | 0.07         | 0.018366667  | -0.224266667 | 0.017533333  | 0.021466667  |
| LOC648863    | -0.148666667 | 0.167        | -0.146933333 | 0.002333333  | 0.181466667  |
| LOC642975    | -0.2394      | -0.017466667 | 0.006466667  | -0.1343      | -0.0102      |
| LOC647276    | -0.043666667 | -0.099166667 | -0.0261      | -0.0533      | 0.073466667  |
| LOC100130092 | 0.346566667  | 0.030766667  | -0.1231      | 0.2233       | 0.0541       |
| WHSC2        | 0.212633333  | -0.061933333 | 0.162233333  | 0.154033333  | 0.0263       |
| ARPC5        | -0.139133333 | -0.0371      | -0.0195      | -0.0785      | 0.068833333  |
| CCDC138      | 0.212633333  | 0.085        | -0.1529      | 0.181266667  | 0.003366667  |
| GOLGA7B      | 0.047366667  | -0.031233333 | -0.0025      | 0.117133333  | 0.008766667  |
| PARVA        | 0.0337       | -0.110033333 | -0.306233333 | 0.048        | -0.2016      |
| CDC40        | 0.112        | 0.049766667  | -0.1358      | 0.091966667  | -0.053666667 |
| BTG1         | -0.497033333 | -0.1442      | 0.150733333  | -0.321666667 | -0.092133333 |
| FAM72D       | 0.056633333  | 0.243333333  | -0.000866667 | 0.236033333  | 0.200966667  |
| TGFBR3       | -0.078       | 0.0298       | 0.035        | -0.231433333 | 0.0232       |
| CAV2         | 0.236566667  | -0.006266667 | -0.145266667 | 0.239166667  | -0.029866667 |
| LOC100132488 | 0.024566667  | -0.034566667 | -0.036633333 | -0.002733333 | 0.0592       |
| C18orf21     | -0.056833333 | 0.029733333  | 0.000933333  | 0.102933333  | 0.052033333  |
| ZNF451       | -0.167733333 | 0.0541       | 0.0722       | 0.083233333  | -0.051533333 |
| GFM2         | -0.144766667 | 0.0378       | -0.0795      | -0.022033333 | 0.077166667  |
| RPLP2        | 0.076333333  | -0.224066667 | -0.049633333 | -0.1267      | 0.0584       |
| HECTD2       | 0.082066667  | 0.069566667  | -0.081633333 | 0.087966667  | -0.0361      |
| WDFY3        | -0.042233333 | -0.112433333 | 0.035833333  | 0.006866667  | -0.017133333 |
| LOC100133242 | 0.0084       | -0.104166667 | 0.076466667  | -0.056566667 | 0.032866667  |
| CTDSP2       | -0.334266667 | -0.038433333 | 0.115933333  | -0.1715      | 0.0316       |
| RMND1        | -0.2072      | -0.005066667 | -0.0099      | -0.119433333 | 0.0442       |
| LOC100132992 | -0.017866667 | 0.046666667  | -0.0541      | 0.114866667  | 0.057066667  |
| RAPGEF5      | -0.006333333 | -0.072366667 | 0.146333333  | 0.0345       | 0.0134       |
| LOC728518    | -0.1267      | 0.068833333  | 0.097833333  | 0.076266667  | -0.022233333 |
| LOC646330    | -0.007033333 | -0.004       | -0.016433333 | -0.0386      | -0.0449      |
| GIN1         | 0.074366667  | -0.086966667 | -0.106266667 | -0.129733333 | 0.0634       |
| INTU         | -0.0004      | 0.0236       | -0.162266667 | -0.0038      | 0.137233333  |
| LMAN2L       | -0.239866667 | -0.006033333 | 0.0994       | 0.0413       | 0.006933333  |
| SPG21        | -0.008733333 | -0.0682      | -0.031833333 | 0.031066667  | -0.098466667 |
| APBA3        | -0.117266667 | -0.133733333 | -0.001133333 | -0.1531      | -0.045366667 |
| ITCH         | -0.0194      | -0.186633333 | 0.031533333  | 0.038833333  | -0.112366667 |
| TMCO6        | -0.095266667 | -0.008066667 | 0.016933333  | -0.0207      | 0.019133333  |

|              |              |              |              |              |              |
|--------------|--------------|--------------|--------------|--------------|--------------|
| TSC22D4      | -0.089833333 | 0.021933333  | 0.030233333  | 0.0525       | -0.0437      |
| VRK1         | 0.2847       | 0.016666667  | -0.098533333 | 0.3341       | -0.073633333 |
| LOC652675    | -0.1315      | 0.075166667  | 0.135066667  | 0.000566667  | 0.0438       |
| KLHL18       | 0.421933333  | 0.142533333  | -0.100766667 | 0.493        | -0.012833333 |
| LOC642393    | -0.0756      | 0.2301       | 0.0716       | 0.154333333  | 0.1427       |
| NDUFS4       | -0.085033333 | -0.041866667 | -0.154533333 | -0.0653      | -0.0127      |
| LDHB         | 0.072266667  | -0.0242      | -0.031066667 | 0.011466667  | 0.043866667  |
| SNORD12      | 0.3015       | 0.110066667  | -0.183433333 | 0.147633333  | 0.0474       |
| LOC643284    | 0.037466667  | -0.1007      | -0.0038      | 0.067633333  | -0.0901      |
| LOC647361    | -0.0221      | -0.037933333 | -0.004966667 | 0.014166667  | 0.061666667  |
| SBNO1        | 0.1023       | -0.002166667 | -0.066433333 | 0.089733333  | 0.0035       |
| IMAA         | 0.096433333  | -0.199033333 | -0.0265      | -0.049466667 | 0.101366667  |
| LOC728931    | -0.118866667 | 0.178333333  | -0.0586      | 0.015        | 0.0381       |
| UXS1         | 0.2565       | -0.108533333 | 0.024966667  | 0.102766667  | 0.046066667  |
| LOC645937    | 0.1948       | 0.020866667  | -0.108266667 | 0.099266667  | 0.0987       |
| CLIC4        | -0.4505      | -0.276433333 | -0.007966667 | -0.3841      | -0.158333333 |
| ZNF816A      | -0.197933333 | 0.096766667  | -0.095       | -0.089733333 | 0.0314       |
| C1GALT1      | -0.118166667 | -0.076666667 | 0.086333333  | -0.089233333 | 0.0605       |
| SNW1         | -0.0621      | 0.0411       | -0.055366667 | 0.105033333  | -0.030433333 |
| ETV3         | 0.148633333  | 0.0584       | -0.063166667 | 0.117133333  | 0.021866667  |
| ITGB1BP1     | -0.06        | 0.006166667  | 0.032566667  | 0.026533333  | 0.015666667  |
| LOC100131349 | -0.084033333 | 0.125433333  | -0.204766667 | -0.1011      | 0.023666667  |
| SEC22C       | 0.105633333  | -0.002866667 | -0.089866667 | 0.118766667  | 0.008833333  |
| SECISBP2     | -0.0121      | -0.084066667 | -0.034033333 | -0.038066667 | -0.0115      |
| SDHD         | -0.2225      | -0.124666667 | 0.107433333  | -0.110833333 | 0.0076       |
| GPR89A       | 0.196066667  | -0.015333333 | 0.012766667  | 0.1467       | 0.064033333  |
| CD79B        | -0.164233333 | 0.114133333  | -0.1784      | -0.0641      | 0.042133333  |
| BLOC1S2      | -0.062433333 | -0.2437      | -0.226833333 | -0.045066667 | -0.165266667 |
| LOC653557    | 0.039466667  | 0.058066667  | -0.185433333 | -0.0707      | 0.127733333  |
| C16orf68     | -0.024166667 | -0.111266667 | 0.079766667  | -0.0052      | -0.016533333 |
| CMTM6        | -0.093366667 | -0.069466667 | 0.1126       | -0.079233333 | -0.090733333 |
| CHML         | 0.186633333  | 0.035666667  | 0.0485       | 0.087066667  | 0.2593       |
| LOC146177    | 0.0072       | -0.046833333 | 0.092766667  | 0.047933333  | -0.012966667 |
| LOC649076    | 0.1076       | 0.022033333  | -0.169933333 | -0.0088      | 0.000366667  |
| MRPL33       | 0.105633333  | -0.0101      | -0.0631      | 0.1208       | 0.031366667  |
| LOC648249    | -0.0417      | -0.137133333 | 0.101933333  | 0.083066667  | -0.044066667 |
| ARNT2        | 0.050266667  | 0.0929       | 0.4832       | -0.021833333 | 0.301433333  |
| TP53AP1      | -0.161466667 | -0.108133333 | 0.130966667  | -0.112       | 0.000533333  |
| AYP1p1       | -0.248166667 | -0.0831      | 0.125266667  | -0.144866667 | -0.005166667 |
| N6AMT1       | 0.078166667  | 0.174133333  | -0.022966667 | 0.093933333  | 0.154466667  |
| MED28        | -0.035066667 | -0.1187      | -0.009       | 0.003066667  | -0.0075      |
| HBP1         | -0.592833333 | -0.0667      | 0.099266667  | -0.372933333 | -0.088433333 |
| MEMO1        | 0.013033333  | 0.128        | -0.035833333 | 0.142433333  | -0.016166667 |
| DNAJB14      | -0.2034      | -0.1464      | 0.053833333  | -0.110366667 | -0.066733333 |
| LOC648982    | -0.006733333 | 0.0175       | -0.025133333 | -0.013433333 | 0.081133333  |
| ARFGEF2      | -0.0357      | 0.079466667  | -0.071666667 | 0.0462       | -0.006533333 |
| DGCR6        | -0.187833333 | -0.214866667 | -0.093866667 | -0.214033333 | -0.054233333 |

|              |              |              |              |              |              |
|--------------|--------------|--------------|--------------|--------------|--------------|
| C16orf63     | -0.136566667 | -0.0859      | -0.056166667 | -0.0473      | -0.0753      |
| AQP11        | -0.183566667 | 0.017        | 0.009666667  | -0.1191      | 0.081566667  |
| PRDX3        | 0.062066667  | 0.016866667  | 0.115566667  | 0.036366667  | 0.099566667  |
| GALT         | -0.169766667 | -0.093766667 | 0.029666667  | -0.1657      | -0.0256      |
| MRPL10       | -0.138633333 | 0.1205       | -0.1608      | 0.036266667  | 0.010133333  |
| GOPC         | 0.035033333  | -0.113466667 | -0.1606      | 0.035566667  | -0.106933333 |
| SIN3B        | -0.1496      | -0.0658      | 0.006966667  | -0.150366667 | 0.045133333  |
| FAM86B1      | 0.1          | -0.108966667 | -0.045066667 | 0.015633333  | 0.0343       |
| IRAK1        | 0.197766667  | 0.022666667  | 0.001766667  | 0.1116       | 0.097433333  |
| PBK          | 0.113966667  | 0.0092       | -0.033866667 | 0.083866667  | 0.0697       |
| ARPC3        | 0.024766667  | -0.215866667 | 0.0281       | -0.007633333 | -0.072333333 |
| ZNF187       | -0.1464      | -0.011333333 | -0.017633333 | -0.111633333 | 0.0427       |
| ANXA3        | -0.002366667 | 0.2499       | -0.053466667 | 0.299566667  | 0.102833333  |
| COPZ1        | 0.046366667  | -0.071633333 | -0.1096      | -0.0775      | -0.008733333 |
| MSH2         | 0.170666667  | 0.2161       | -0.233566667 | 0.091        | 0.117133333  |
| KANK2        | 0.0873       | -0.0235      | 0.127766667  | 0.132433333  | 0.0199       |
| REXO2        | -0.053966667 | 0.0058       | 0.138366667  | 0.083566667  | 0.078066667  |
| GTF2IRD1     | -0.1438      | -2.31E-18    | -0.038133333 | -0.146433333 | -0.041866667 |
| LYN          | 0.1227       | -0.136066667 | -0.081533333 | 0.095        | -0.127866667 |
| ECHDC1       | -0.1233      | -0.040233333 | -0.241833333 | -0.1035      | 0.034066667  |
| LHPP         | -0.247766667 | -0.2621      | 0.120866667  | -0.229033333 | -0.120933333 |
| TMEM140      | -0.1781      | -0.166466667 | 0.013366667  | -0.0795      | -0.0693      |
| GNB2         | -0.0932      | -0.0356      | 0.1215       | 0.0306       | 0.001966667  |
| TMEM194      | 0.3359       | 0.1222       | -0.197766667 | 0.292033333  | 0.0819       |
| ATP5O        | -0.106066667 | -0.121966667 | -0.021766667 | -0.039266667 | -0.034866667 |
| SETD1B       | -0.013333333 | -0.183333333 | -0.0231      | 0.0426       | -0.169166667 |
| EEF1G        | 0.033733333  | -0.177466667 | 0.051266667  | 0.009666667  | -0.078666667 |
| FKTN         | -0.256633333 | 0.345733333  | -0.0037      | 0.004466667  | 0.074566667  |
| ZNF763       | -0.0523      | 0.154066667  | -0.116766667 | -0.003233333 | -0.015833333 |
| C4orf33      | -0.353466667 | -0.007466667 | 0.0202       | -0.242466667 | -0.127866667 |
| ALG10        | 0.067566667  | 0.1376       | -0.042333333 | 0.139533333  | 0.0629       |
| NOB1         | 0.077133333  | 0.0524       | 0.1172       | 0.265633333  | 0.057833333  |
| BTG2         | 0.034533333  | -0.257       | -0.124733333 | 0.0074       | -0.1769      |
| PGAP3        | -0.1115      | -0.1321      | 0.039966667  | -0.117866667 | -0.0746      |
| LOC643313    | 0.0545       | 0.109666667  | -0.098833333 | 0.037166667  | 0.021033333  |
| MICA         | 0.089966667  | -0.002433333 | -0.0289      | 0.0479       | 0.024733333  |
| UBE2H        | -0.5928      | -0.068833333 | 0.214666667  | -0.320933333 | 0.0909       |
| FLYWCH2      | -0.0662      | -0.081366667 | -0.0266      | -0.0964      | -0.0073      |
| ASL          | 0.0271       | -0.002733333 | -0.055166667 | -0.0055      | 0.001633333  |
| LOC729324    | 0.012433333  | 0.2647       | -0.144066667 | 0.0272       | 0.0279       |
| LOC100129211 | -0.2112      | 0.797466667  | -0.161566667 | -0.0966      | 0.487566667  |
| EXO1         | 0.362766667  | 0.002133333  | -0.185066667 | 0.088966667  | 0.022566667  |
| LOC346887    | 0.1394       | 0.027566667  | 0.2885       | 0.045366667  | 0.2133       |
| C8orf59      | -0.1041      | -0.104       | 0.043333333  | -0.074733333 | 0.0162       |
| C1orf66      | -0.192466667 | -0.140966667 | 0.191966667  | -0.0512      | -0.037133333 |
| GLG1         | -0.210466667 | -0.228966667 | 0.203833333  | -0.1239      | -0.071066667 |
| STAG2        | -0.072266667 | -0.1518      | 0.049466667  | -0.047333333 | 0.100466667  |

|              |              |              |              |              |              |
|--------------|--------------|--------------|--------------|--------------|--------------|
| C3orf63      | -0.016766667 | -0.1449      | 0.020966667  | 0.031266667  | -0.0575      |
| TRIP4        | -0.0707      | -0.044866667 | -0.1593      | -0.0587      | -0.061566667 |
| LOC646531    | 0.1269       | -0.0053      | 0.0162       | 0.071        | 0.102266667  |
| RASAL2       | 0.233566667  | -0.138266667 | -0.193366667 | 0.279533333  | -0.189533333 |
| FBXL2        | -0.0385      | 0.022633333  | -0.0242      | -0.0376      | 0.052066667  |
| ZBTB6        | 0.1062       | 0.066566667  | -0.052666667 | 0.147566667  | 0.023033333  |
| MPV17        | -0.148333333 | -0.170566667 | 0.014166667  | -0.1109      | -0.092566667 |
| MAPK14       | 0.0324       | -0.0226      | -0.007133333 | 0.114766667  | -0.058533333 |
| LOC100130516 | -0.051233333 | 0.3675       | -0.1425      | -0.0045      | 0.175033333  |
| SGK3         | -0.013333333 | -0.0673      | 0.075633333  | 0.0982       | -0.021066667 |
| EIF2C1       | -0.173866667 | 0.019533333  | -0.067666667 | -0.084966667 | -0.1049      |
| B3GAT3       | -0.0308      | 0.079366667  | 0.016133333  | 0.0038       | 0.0856       |
| RAB34        | -0.063666667 | 0.0873       | 0.099433333  | -0.039833333 | -0.0385      |
| GDI2         | 0.0603       | 0.0835       | -0.043366667 | 0.211533333  | -0.13        |
| MARK3        | -0.075766667 | 0.1242       | 0.072266667  | 0.0457       | 0.053966667  |
| LOC649946    | -0.321366667 | 0.137533333  | -0.311133333 | -0.238866667 | 0.089733333  |
| LOC654116    | 0.002533333  | 0.0718       | -0.123466667 | -0.035866667 | 0.0384       |
| GTF2H3       | 0.0605       | -0.098933333 | -0.065966667 | 0.052366667  | -0.110666667 |
| LOC730029    | -0.559566667 | 0.1241       | -0.035466667 | -0.231733333 | 0.220333333  |
| LOC729686    | -0.0602      | 0.121233333  | -0.374533333 | -0.088366667 | -0.008066667 |
| LOC440063    | -0.030733333 | 0.0344       | -0.266333333 | -0.1078      | -0.01        |
| LOC646135    | -0.071233333 | -0.089733333 | 0.074866667  | -0.039833333 | -0.163433333 |
| MTBP         | 0.102266667  | 0.025666667  | 0.094966667  | 0.120333333  | 0.0469       |
| EXOSC2       | 0.273333333  | 0.125666667  | -0.1168      | 0.323333333  | 0.016233333  |
| LOC729348    | -0.204       | 0.066733333  | -0.045733333 | -0.021266667 | -0.1288      |
| MBD4         | -0.181566667 | 0.7087       | -0.2597      | -0.0234      | 0.223033333  |
| MPST         | -0.033633333 | -0.1563      | 0.013733333  | 0.031133333  | -0.1089      |
| ISCA2        | -0.066233333 | 0.103466667  | 0.104033333  | 0.1169       | 0.058833333  |
| CRKL         | 0.272966667  | -0.045533333 | -0.0507      | 0.174266667  | -0.015066667 |
| TMEM182      | 0.046333333  | -0.013933333 | -0.041566667 | -0.064733333 | 0.076566667  |
| RAD17        | 0.027633333  | -0.0504      | -0.129266667 | -0.090566667 | 0.062266667  |
| CATSPER2     | -0.131666667 | 0.6978       | -0.1654      | -0.0935      | 0.381233333  |
| TYK2         | -0.014433333 | -0.041966667 | -0.084433333 | -0.0493      | -0.019066667 |
| CDC16        | -0.224733333 | -0.054       | -0.069933333 | -0.112033333 | -0.078033333 |
| EHD3         | -0.123233333 | -0.090333333 | 0.0617       | -0.088233333 | 0.067566667  |
| FAM50A       | -0.1367      | -0.110333333 | 0.089633333  | -0.023133333 | -0.012066667 |
| POLH         | 0.011        | 0.0136       | 0.081066667  | 0.157166667  | 0.104533333  |
| LOC100129158 | 0.0775       | 0.0044       | -0.016266667 | 0.030666667  | -0.010266667 |
| LSM14B       | 0.0474       | -0.024866667 | 0.027333333  | 0.098366667  | 0.1111       |
| FAM75B       | 0.1292       | -0.0422      | 0.028633333  | 0.135466667  | 0.157666667  |
| LOC731915    | -0.0962      | -0.009866667 | 0.139266667  | 0.0883       | -0.0238      |
| CLK4         | -0.0801      | -0.242933333 | 0.214133333  | 0.076866667  | -0.1357      |
| EIF4E        | 0.141566667  | 0.194466667  | -0.010733333 | 0.117866667  | 0.177133333  |
| IFRD2        | 0.295        | 0.004733333  | -0.193533333 | 0.167533333  | -0.032866667 |
| LOC652471    | 0.001133333  | -0.110066667 | 0.0326       | 0.0594       | -0.098066667 |
| MRPS25       | 0.150966667  | -0.0586      | -0.2233      | 0.057633333  | 0.0243       |
| MORG1        | -0.067633333 | -0.0891      | -0.059633333 | -0.091333333 | 0.054066667  |



|              |              |              |              |              |              |
|--------------|--------------|--------------|--------------|--------------|--------------|
| C16orf93     | 0.0177       | -0.0531      | -0.1248      | -0.023966667 | 0.0254       |
| ALKBH3       | -0.142966667 | -0.051933333 | -0.277566667 | -0.074933333 | -0.153233333 |
| GATC         | 0.121233333  | -0.031833333 | 0.065033333  | 0.144        | 0.0288       |
| ACOT7        | -0.002866667 | 0.057433333  | 0.1809       | -0.0032      | 0.187733333  |
| USP18        | -0.158366667 | 0.0205       | -0.007333333 | -0.120333333 | 0.065966667  |
| ZBTB2        | 0.157866667  | 0.1819       | -0.159866667 | 0.182966667  | 0.064633333  |
| TMEM65       | -0.146366667 | -0.072433333 | 0.08         | 0.041333333  | 0.0768       |
| SNORA68      | 0.115166667  | -0.112133333 | -0.039433333 | 0.1545       | -0.1939      |
| C10orf61     | -0.042466667 | -0.103433333 | 0.012266667  | -0.038266667 | -0.049933333 |
| LOC389137    | -0.119133333 | 0.162066667  | 0.0579       | 0.052133333  | 0.200366667  |
| PORCN        | 0.2149       | -0.227066667 | -0.130966667 | 0.101        | -0.031833333 |
| WHSC1        | 0.144866667  | -0.048133333 | 0.002033333  | 0.079        | 0.033866667  |
| GPS1         | -0.025833333 | 0.029166667  | 0.018966667  | 0.123966667  | -0.120533333 |
| SLC29A1      | 0.604966667  | -0.0052      | -0.165766667 | 0.338366667  | 0.0571       |
| CCDC109B     | 0.269533333  | -0.0041      | -0.096966667 | 0.1283       | 0.056233333  |
| MCM7         | 0.153566667  | 0.028033333  | -0.045566667 | 0.144533333  | 0.038933333  |
| LOC100133465 | -0.028633333 | 0.030466667  | -0.014466667 | 0.080833333  | 0.019933333  |
| LOC284757    | -0.138833333 | 0.0265       | -0.0118      | -0.179166667 | 0.0061       |
| ZCRB1        | -0.0716      | -0.024366667 | -0.004433333 | -0.037033333 | 0.005233333  |
| FBXO11       | 0.1126       | -0.123533333 | 0.031633333  | 0.080533333  | 0.0132       |
| PPM1D        | 0.191566667  | -0.1881      | 0.035966667  | 0.1365       | 0.067666667  |
| LIMK1        | -0.0561      | -0.057433333 | 0.035166667  | -0.138633333 | 0.105066667  |
| LOC100129237 | -0.1532      | 0.2649       | -0.273133333 | -0.000533333 | 0.0582       |
| RB1          | 0.094133333  | 0.0779       | -0.0838      | 0.0587       | 0.1002       |
| RPS27A       | 0.1865       | -0.1806      | -0.036266667 | 0.023066667  | 0.0206       |
| LOC729952    | 0.171166667  | 0.145433333  | -0.1912      | 0.262366667  | 0.163333333  |
| LOC344328    | -0.101666667 | -0.039633333 | -0.035133333 | -0.0238      | -0.034833333 |
| ASCC3        | -0.0763      | 0.202366667  | -0.104966667 | 0.1412       | -0.0262      |
| 1-Sep        | 0.098733333  | -0.038966667 | 0.0391       | 0.125833333  | 0.061733333  |
| LOC440459    | -0.007833333 | 0.014633333  | -0.021133333 | 0.0384       | -0.000666667 |
| GTF2H2B      | 0.072033333  | 0.120766667  | -0.041866667 | 0.071366667  | 0.059266667  |
| MAN2C1       | 0.009733333  | -0.190933333 | -0.044933333 | -0.048933333 | -0.120433333 |
| LOC727751    | -0.046433333 | -0.0336      | -0.047433333 | -0.0998      | -0.012633333 |
| LOC100133398 | 0.232133333  | -0.006166667 | 0.0116       | 0.239966667  | 0.093133333  |
| DNAJC9       | 0.366833333  | 0.177333333  | -0.1412      | 0.434166667  | 0.108533333  |
| BAP1         | -0.008566667 | 0.062366667  | -0.174766667 | 0.008066667  | 0.021033333  |
| COX4I1       | -0.0059      | -0.219633333 | 0.008666667  | -0.013866667 | -0.021433333 |
| PPP4R1       | 0.140533333  | 0.024166667  | -0.0872      | 0.182466667  | -0.022533333 |
| STIM1        | -0.073033333 | -0.094266667 | -0.185       | -0.0387      | -0.093833333 |
| LOC650157    | -0.027366667 | -0.020833333 | 0.0893       | 0.033466667  | -0.054133333 |
| ZBTB43       | -0.1096      | -0.162233333 | -0.020233333 | -0.067733333 | -0.1675      |
| RNY5         | 0.129966667  | -0.010066667 | 0.111866667  | 0.2435       | 0.029366667  |
| RIMBP3       | -0.2345      | -0.053166667 | 0.008566667  | -0.0054      | -0.1095      |
| GPHN         | -0.059333333 | 0.102766667  | 0.1118       | 0.0948       | 0.0124       |
| PRAMEF13     | -0.071833333 | -0.124033333 | -0.046266667 | -0.020433333 | -0.089266667 |
| PPDPF        | -0.100666667 | -0.195366667 | 0.035466667  | -0.0343      | -0.083133333 |
| RANBP6       | 0.115333333  | 0.0121       | 0.018966667  | 0.041966667  | 0.207        |

|           |              |              |              |              |              |
|-----------|--------------|--------------|--------------|--------------|--------------|
| FAM178A   | 0.1567       | 0.0557       | -0.0216      | 0.034566667  | 0.033133333  |
| SLC29A2   | -0.021466667 | -0.140033333 | 0.084033333  | -0.0742      | 0.015666667  |
| UBE2T     | 0.219033333  | 0.053233333  | -0.1611      | 0.1302       | 0.0458       |
| ATP5B     | -0.104433333 | -0.0252      | -0.028066667 | -0.079466667 | 0.0339       |
| OAS1      | -0.213       | -0.0136      | 0.0658       | -0.1273      | 0.023833333  |
| FLJ22222  | -0.1142      | -0.023766667 | 0.010966667  | 0.1118       | -0.018366667 |
| C5orf32   | -0.262766667 | -0.060166667 | 0.0276       | -0.1627      | -0.0268      |
| DLGAP4    | -0.170866667 | -0.118566667 | 0.1653       | -0.2028      | -0.0102      |
| SH3BP5L   | 0.0361       | -0.167866667 | -0.020866667 | 0.107666667  | -0.091866667 |
| ANP32B    | 0.174633333  | -0.021533333 | -0.113166667 | 0.030166667  | -0.019233333 |
| DCUN1D5   | 0.261433333  | -0.102033333 | -0.141233333 | 0.082633333  | 0.081033333  |
| NIPAL1    | 0.173833333  | 0.0469       | 0.314466667  | 0.409633333  | 0.0713       |
| TMPO      | 0.359466667  | 0.0986       | -0.1068      | 0.248433333  | 0.0519       |
| FUNDC1    | -0.173266667 | 0.033933333  | -0.084133333 | -0.096833333 | -0.018233333 |
| ARAP2     | 0.140833333  | -0.097033333 | -0.093833333 | 0.0511       | 0.043766667  |
| RPL27A    | -0.062333333 | -0.001066667 | -0.039166667 | 0.000533333  | -0.016033333 |
| LOC646044 | 0.105633333  | 0.147033333  | 0.058166667  | 0.048966667  | 0.044866667  |
| LOC649209 | -0.290233333 | 0.1641       | -0.300366667 | -0.2354      | 0.042033333  |
| MCM10     | 0.294066667  | -0.002233333 | -0.043066667 | 0.1602       | 0.1496       |
| CSNK2B    | 0.081566667  | -0.156733333 | 0.113666667  | 0.058333333  | 0.023033333  |
| PKNOX1    | 0.0818       | 0.028666667  | 0.1362       | 0.0454       | 0.218866667  |
| FBXO9     | -0.100433333 | -0.016033333 | 0.156233333  | 0.093333333  | -0.0338      |
| SEMA4B    | -0.275633333 | -0.216566667 | 0.156433333  | -0.1726      | -0.163133333 |
| MBLAC2    | -0.158466667 | 0.039966667  | -0.059866667 | -0.0603      | -0.019033333 |
| RPLP0     | 0.145433333  | -0.198266667 | 0.140233333  | 0.028566667  | -0.067266667 |
| FAM96B    | -0.1796      | 0.047433333  | -0.080566667 | -0.0738      | -0.029       |
| ZNF134    | -0.005866667 | -0.0143      | 0.018        | 0.1294       | -0.021933333 |
| C1orf58   | 0.106666667  | -0.0687      | -0.033566667 | 0.035666667  | -0.053833333 |
| PRNP      | -0.0143      | 0.039833333  | 0.224133333  | -0.110466667 | -0.040466667 |
| GLUD1     | -0.042466667 | 0.023466667  | -0.037733333 | -0.078366667 | -0.0137      |
| SESTD1    | -0.065866667 | -0.165       | -0.022933333 | -0.116533333 | -0.0307      |
| LOC642282 | -0.000266667 | -0.157333333 | 0.061        | -0.0861      | 0.050966667  |
| STXBP2    | 0.086133333  | -0.0482      | 0.023366667  | -0.022233333 | 0.067733333  |
| DYRK1B    | -0.165266667 | -0.145766667 | -0.076866667 | -0.099566667 | -0.090266667 |
| IL11      | 0.673066667  | 0.0197       | 0.229633333  | 0.3664       | 0.119533333  |
| PIGU      | -0.052266667 | 0.092133333  | -0.0084      | -0.026033333 | 0.193366667  |
| PASK      | 0.105966667  | -0.0332      | -0.016833333 | -0.005233333 | 0.077033333  |
| SNORD3C   | 0.064366667  | -0.0417      | 0.132        | 0.2079       | -0.097066667 |
| C9orf85   | -0.153466667 | -0.101966667 | 0.094966667  | -0.0121      | -0.010866667 |
| YEATS4    | 0.087833333  | -0.026333333 | -0.0616      | 0.098466667  | 0.069766667  |
| ZC3H18    | 0.1812       | 0.0058       | -0.0036      | 0.137866667  | 0.0785       |
| LOC285053 | 0.049933333  | -0.222266667 | 0.019        | 0.054266667  | -0.0808      |
| CYB5D1    | 0.1204       | -0.197833333 | -0.145466667 | 0.106833333  | -0.115566667 |
| CORO1B    | -0.5705      | -0.059833333 | 0.2646       | -0.358466667 | -0.131433333 |
| HCP5      | -0.113066667 | -0.025033333 | -0.074       | -0.1486      | -0.040133333 |
| TUBGCP5   | 0.133966667  | 0.063833333  | -0.0846      | 0.1402       | -0.117266667 |
| YY1       | -0.0452      | 0.007533333  | 0.019166667  | -0.0385      | 0.1828       |

|              |              |              |              |              |              |
|--------------|--------------|--------------|--------------|--------------|--------------|
| OSBPL2       | -0.123233333 | -0.0891      | -0.080933333 | -0.059533333 | -0.0721      |
| EXOC1        | -0.1065      | -0.057333333 | 0.0331       | 0.046066667  | -0.1298      |
| SSBP4        | 0.075833333  | -0.028266667 | 0.08         | 0.011666667  | 0.078633333  |
| LRRC40       | -0.169466667 | 0.126666667  | 0.0258       | -0.157133333 | 0.0439       |
| C10orf28     | 0.236033333  | -0.044366667 | -0.0302      | 0.2104       | -0.081766667 |
| LOC100130623 | -0.176033333 | -0.093033333 | 0.0434       | -0.165033333 | 0.058        |
| PSMB9        | -0.175066667 | -0.042333333 | 0.147166667  | -0.102       | 0.036533333  |
| EIF2AK2      | -0.0479      | -0.1089      | 0.018733333  | -0.0454      | -0.0473      |
| CPSF2        | 0.040233333  | -0.192533333 | -0.012066667 | -0.027133333 | 0.069333333  |
| RARA         | 0.304        | -0.002166667 | 0.202466667  | 0.410833333  | 0.0529       |
| ANKIB1       | -0.235666667 | -0.0296      | 0.086633333  | -0.0758      | -0.035566667 |
| HNMT         | -0.3179      | -0.1428      | 0.168333333  | -0.206433333 | -0.052366667 |
| HEXA         | -0.124733333 | -0.1776      | -0.050466667 | -0.135366667 | -0.105766667 |
| SURF4        | 0.019233333  | -0.1597      | -0.0209      | -0.008033333 | -0.0459      |
| CDYL         | -0.026633333 | 0.015666667  | 0.051533333  | 0.124133333  | 0.028633333  |
| HPS3         | -0.003266667 | 0.1516       | -0.1049      | 0.0916       | 0.062233333  |
| CABC1        | 0.068866667  | -0.003333333 | -0.084866667 | 0.062433333  | 0.117933333  |
| ALS2CR11     | -0.1745      | 0.126033333  | 0.046766667  | -0.005566667 | -0.059133333 |
| PWWP2A       | -0.002233333 | -0.050433333 | 0.062866667  | 0.046566667  | -0.055633333 |
| CSAG3        | -0.0025      | -0.273666667 | 0.274233333  | 0.097933333  | -0.1328      |
| SGTA         | 0.278966667  | 0.147366667  | -0.214966667 | 0.199733333  | 0.046566667  |
| LOC646301    | 0.031933333  | -0.106166667 | 0.030466667  | 0.015766667  | -0.031933333 |
| LOC646784    | -0.4955      | 0.309466667  | -0.4983      | -0.361366667 | 0.227133333  |
| RPL24        | 0.008133333  | -0.063766667 | 0.0095       | 0.021366667  | -0.0057      |
| ZNF16        | -0.176466667 | 0.077766667  | -0.1742      | -0.028766667 | -0.022866667 |
| ZNF674       | 0.0774       | 0.1858       | -0.027066667 | -0.035233333 | 0.111433333  |
| ABHD3        | 0.091166667  | -0.044066667 | -0.129233333 | -0.056266667 | 0.093433333  |
| LYSMD1       | -0.2387      | 0.063066667  | 0.047266667  | 0.0319       | -0.079       |
| ZFAND6       | -0.175033333 | -0.137966667 | 0.222266667  | -0.116433333 | 0.041833333  |
| C6orf225     | -0.109033333 | 0.215666667  | -0.2113      | -0.0859      | 0.2223       |
| TRIM37       | 0.0592       | -0.079566667 | -0.086833333 | 0.060566667  | -0.0854      |
| PREX1        | 0.0359       | 0.0384       | -0.0112      | 0.0334       | 0.0791       |
| LOC642321    | -0.035866667 | -0.0097      | -0.0774      | -0.095133333 | 0.075466667  |
| LOC100133019 | -0.2737      | 0.2175       | -0.228833333 | -0.194366667 | 0.0474       |
| ZNF76        | 0.049433333  | -0.037       | -0.0666      | 0.0105       | 0.026566667  |
| LOC400304    | -0.0367      | 0.060333333  | -0.016766667 | 0.0806       | -0.092233333 |
| LOC100130553 | -0.106366667 | -0.0404      | 0.083266667  | -0.040866667 | -0.013133333 |
| C19orf29     | 0.127733333  | 0.0484       | -0.1131      | 0.133733333  | -0.079233333 |
| PTPN14       | 0.211        | 0.100266667  | 0.001033333  | 0.195633333  | 0.101766667  |
| NGRN         | 0.105166667  | -0.205733333 | -0.164233333 | 0.056366667  | -0.109466667 |
| FAM118B      | -0.009166667 | 0.081033333  | -0.220133333 | -0.0526      | 0.008        |
| C14orf156    | 0.131466667  | 0.043533333  | -0.095266667 | 0.0845       | 0.068766667  |
| LOC440354    | -0.090233333 | 0.157233333  | -0.097666667 | 0.0242       | 0.018566667  |
| IGBP1        | -0.3622      | -0.002933333 | 0.031633333  | -0.2633      | -0.103766667 |
| C14orf106    | 0.125366667  | 0.068633333  | 0.179066667  | 0.1982       | 0.043133333  |
| NACA2        | -0.4055      | 0.1273       | -0.343866667 | -0.3528      | 0.137266667  |
| COX7A2L      | -0.1585      | -0.0244      | -0.0259      | -0.055066667 | -0.077       |

|              |              |              |              |              |              |
|--------------|--------------|--------------|--------------|--------------|--------------|
| MIR345       | 0.015433333  | -0.112033333 | -0.075966667 | -0.062066667 | -0.078066667 |
| LOC100128689 | 0.1729       | 0.152766667  | -0.047033333 | 0.1582       | 0.130966667  |
| TRIM63       | 0.053966667  | -0.024733333 | -0.026366667 | 0.059466667  | 0.007833333  |
| CDKN2AIP     | 0.2317       | 0.0845       | -0.044633333 | 0.181433333  | 0.108066667  |
| CHRA1        | 0.130533333  | -0.0302      | -0.024566667 | 0.129566667  | -0.070833333 |
| TRAPPC6B     | -0.150433333 | 0.0564       | 0.081466667  | -0.018766667 | 0.0254       |
| SLC25A11     | 0.047033333  | -0.0677      | -0.036166667 | 0.0125       | -0.017766667 |
| TMEM18       | 0.084666667  | 0.0682       | -0.228166667 | 0.1606       | -0.022166667 |
| RASSF6       | -0.081333333 | 0.794033333  | -0.180433333 | -0.066133333 | 0.473866667  |
| MRPL38       | 0.048066667  | 0.094933333  | -0.1277      | 0.0487       | 0.149366667  |
| UQCRHL       | -0.084333333 | -0.053966667 | 0.124266667  | -0.0603      | 0.069366667  |
| CCNO         | -0.040633333 | -0.020166667 | 0.086366667  | 0.0267       | -0.0466      |
| C7orf28B     | -0.105233333 | 0.1378       | -0.1304      | -0.043133333 | 0.071366667  |
| WDR35        | 0.185533333  | -0.0205      | -0.142366667 | 0.152166667  | -0.009066667 |
| DHRS7        | -0.373766667 | -0.193366667 | 0.0562       | -0.212433333 | -0.207833333 |
| BBC3         | -0.052       | -0.0972      | 0.034633333  | 0.025333333  | -0.090733333 |
| SLC9A5       | -0.009466667 | 0.0293       | 0.151333333  | 0.128066667  | -0.034466667 |
| LOC440563    | -0.065433333 | 0.264066667  | -0.285533333 | -0.0512      | 0.127233333  |
| LOC440575    | -0.0433      | -0.069433333 | -0.0926      | -0.0291      | -0.142533333 |
| TMEM177      | 0.063633333  | -0.1367      | -0.072133333 | 0.1393       | -0.1137      |
| PHF1         | 0.1262       | -0.1149      | 0.085166667  | 0.093733333  | 0.036733333  |
| PPRC1        | 0.236166667  | 0.093566667  | -0.2602      | 0.1381       | 0.032966667  |
| PID1         | 0.049833333  | -0.002033333 | -0.0476      | 0.0961       | 0.067233333  |
| MFSD10       | -0.062166667 | -0.1118      | 0.0384       | -0.149266667 | -0.017833333 |
| LMBRD2       | -0.027133333 | -0.069433333 | -0.021833333 | -0.074866667 | 0.057066667  |
| LOC647055    | 0.1801       | 0.044466667  | -0.016333333 | 0.106066667  | 0.151333333  |
| ST3GAL2      | -0.057566667 | 0.016333333  | -0.065166667 | -0.0161      | -0.019033333 |
| LOC100129958 | 0.207633333  | -0.131766667 | 0.1907       | 0.1523       | -0.082733333 |
| LOC728809    | -0.075566667 | 0.701966667  | -0.116133333 | 0.042433333  | 0.210466667  |
| LOC728823    | -0.0574      | 0.1681       | -0.2259      | -0.0144      | 0.090933333  |
| SPESP1       | -0.128366667 | 0.0049       | 0.130666667  | 0.053266667  | 0.102833333  |
| PTPDC1       | 0.098166667  | -0.039033333 | -0.1426      | 0.1699       | -0.1249      |
| MCAM         | -0.038866667 | -0.034466667 | 0.0627       | 0.0739       | -0.1471      |
| LOC390414    | -0.066666667 | 0.016966667  | -0.090766667 | -0.021       | 0.097166667  |
| PUSL1        | 0.184933333  | 0.0382       | -0.031       | 0.201066667  | 0.030566667  |
| FAM108A3     | 0.0086       | -0.060433333 | 0.0713       | 0.020533333  | 0.038433333  |
| TRIM52       | -0.3314      | -0.102333333 | 0.116266667  | -0.1612      | -0.028033333 |
| YTHDC1       | 0.216966667  | 0.094266667  | -0.049966667 | 0.2522       | -0.0239      |
| GRINL1A      | 0.150266667  | -0.170033333 | -0.234733333 | -0.018933333 | -0.062266667 |
| METTL10      | 0.0904       | 0.058466667  | -0.193166667 | 0.0543       | 0.044433333  |
| FARSLB       | 0.0323       | 0.1491       | 0.089233333  | 0.036766667  | 0.0256       |
| RDH10        | 0.262133333  | -0.101333333 | -0.1249      | 0.0259       | 0.051933333  |
| PRPSAP2      | -0.137033333 | 0.0192       | 0.138566667  | -0.0998      | 0.113066667  |
| EPB41L4A     | -0.0101      | -0.0466      | -0.0688      | 0.020733333  | -0.0509      |
| PPOX         | -0.356833333 | -0.0621      | 0.084066667  | -0.236933333 | -0.0151      |
| METAP1       | 0.109366667  | 0.074433333  | -0.027066667 | 0.0853       | 0.064433333  |
| RPL12        | -0.104766667 | -0.120366667 | -0.0402      | -0.092533333 | -0.002133333 |

|              |              |              |              |              |              |
|--------------|--------------|--------------|--------------|--------------|--------------|
| LOC400721    | -0.066933333 | 0.3847       | -0.136633333 | -0.0118      | 0.147        |
| MYL6         | -0.112966667 | -0.1932      | 0.089666667  | -0.098066667 | 0.021533333  |
| LOC729142    | 0.0008       | 0.2187       | 0.128966667  | 0.138166667  | 0.1378       |
| MAP4         | 0.131133333  | -0.153533333 | 0.034        | -0.062633333 | 0.0016       |
| LOC648742    | -0.276266667 | 0.0578       | 0.096433333  | -0.223766667 | 0.204166667  |
| RPL5         | 0.060333333  | -0.001433333 | -0.083533333 | 0.101633333  | -0.064533333 |
| JMJD2B       | -0.091733333 | 0.083333333  | 0.007033333  | -0.145733333 | 0.161966667  |
| TAF5L        | 0.4794       | 0.031966667  | -0.2283      | 0.327433333  | -6.67E-05    |
| HLA-C        | 0.0176       | -0.179766667 | -0.126166667 | -0.018       | -0.135966667 |
| NCAN         | 0.108966667  | -0.1112      | 0.061233333  | 0.1744       | -0.078666667 |
| PLXNB2       | -0.038966667 | -0.165833333 | 0.046533333  | 0.0525       | -0.0189      |
| RPL10A       | -0.004766667 | -0.0943      | 0.005633333  | -0.052933333 | 0.020566667  |
| RABL2B       | -0.054533333 | 0.055333333  | -0.200466667 | 0.0181       | 0.013966667  |
| HCG4         | 0.115133333  | -0.025833333 | 0.010533333  | 0.1507       | -0.0754      |
| EIF3I        | 0.133866667  | -0.076133333 | 0.135633333  | -0.011       | 0.0643       |
| LOC642954    | 0.0975       | -0.031666667 | -0.018766667 | -0.018766667 | 0.106433333  |
| LRRFIP2      | 0.029033333  | 0.0182       | 0.1426       | 0.1733       | 0.0122       |
| LOC643358    | -0.008133333 | -0.1975      | 0.031633333  | 0.01         | -0.061033333 |
| GPR89B       | 0.236033333  | 0.111433333  | -0.168866667 | 0.126233333  | 0.0909       |
| ADC          | -0.089866667 | -0.126133333 | 0.048566667  | -0.1212      | -0.065066667 |
| NIT1         | -0.238033333 | -0.0748      | 0.156366667  | -0.198133333 | -0.067933333 |
| LOC731777    | -0.0085      | -0.2062      | 0.0374       | 0.018033333  | -0.065633333 |
| ZBTB7A       | -0.019033333 | -0.070966667 | -0.075633333 | -0.010933333 | -0.1748      |
| MDH1         | -0.128966667 | -0.140833333 | 0.064266667  | -0.1062      | -0.141233333 |
| HCG18        | 0.038933333  | -0.0181      | -0.145166667 | 0.0008       | 0.0332       |
| MMS19        | -0.051233333 | 0.1023       | -0.048033333 | -0.109       | -0.018866667 |
| SUMO2        | -0.221166667 | 0.0872       | -0.100633333 | -0.164366667 | 0.116666667  |
| LOC100130518 | -0.0039      | 0.065633333  | -0.045166667 | -0.010966667 | -0.0326      |
| RALA         | -0.097566667 | -0.105666667 | -0.1865      | -0.153866667 | -0.0954      |
| GNPTG        | -0.0107      | -0.070933333 | -0.047       | -0.008666667 | -0.0026      |
| CSAG2        | -0.125966667 | -0.124266667 | 0.0201       | -0.0975      | 0.016966667  |
| HARS2        | -0.0356      | -0.131833333 | -0.155633333 | -0.021633333 | -0.049566667 |
| COX7B2       | -0.3747      | -0.158633333 | 0.2128       | -0.2555      | -0.093866667 |
| RSC1A1       | 0.180733333  | 0.0646       | -0.052733333 | 0.262566667  | -0.028833333 |
| MYO3B        | -0.113033333 | 0.8082       | -0.0967      | 0.151433333  | 0.349666667  |
| DIRC2        | -0.177566667 | -0.145233333 | 0.007566667  | -0.123566667 | 0.031233333  |
| CCNA2        | 0.294633333  | 0.119033333  | -0.194633333 | 0.2259       | -0.046966667 |
| CENPB        | 0.204466667  | -0.000666667 | -0.037633333 | 0.167966667  | -0.060566667 |
| MGC10997     | -0.022266667 | -0.1205      | -0.075466667 | -0.094566667 | -0.036933333 |
| ARD1A        | -0.113766667 | 0.0573       | 0.0082       | 0.018533333  | 0.098233333  |
| MIR557       | 0.085966667  | 0.053133333  | -0.077966667 | 0.1485       | -0.106933333 |
| TTLL1        | 0.008666667  | 0.012166667  | -0.153433333 | -0.014966667 | -0.1427      |
| RGS19        | 0.141566667  | 0.099466667  | 0.023866667  | 0.09         | 0.1192       |
| SPAST        | 0.0834       | -0.2009      | 0.135166667  | 0.14         | 0.007333333  |
| B3GNT2       | 0.045133333  | 0.184466667  | -0.133766667 | 0.073833333  | 0.058566667  |
| DYNLL1       | -0.044066667 | 0.0143       | 0.0201       | 0.058866667  | -0.046133333 |
| HCFC2        | 0.004666667  | -0.022933333 | -0.109633333 | -0.0337      | 0.028033333  |

|              |              |              |              |              |              |
|--------------|--------------|--------------|--------------|--------------|--------------|
| NDUFA11      | -0.1109      | -0.155833333 | -0.005366667 | -0.109433333 | -0.077833333 |
| MIR877       | -0.0352      | 0.074266667  | -0.088933333 | -0.086633333 | 0.048066667  |
| ZNF322A      | -0.041566667 | -0.138933333 | -0.102166667 | 0.0613       | -0.153066667 |
| BCL2L13      | -0.217933333 | -0.1067      | -0.074533333 | -0.159366667 | -0.0611      |
| LOC727803    | 0.403933333  | 0.218466667  | -0.096966667 | 0.415366667  | 0.1012       |
| DMTF1        | 0.031066667  | 0.015533333  | 0.154666667  | 0.065133333  | 0.1061       |
| STXBP4       | -0.133566667 | 0.016933333  | 0.036466667  | -0.035433333 | 0.063333333  |
| PEX19        | -0.146033333 | 0.012833333  | -0.099866667 | -0.022766667 | -0.110433333 |
| ITGA3        | -0.0127      | -0.132033333 | 0.3488       | 0.008133333  | -0.008566667 |
| RNU4-2       | -0.177233333 | -0.1303      | 0.2384       | 0.024333333  | 0.032266667  |
| SRPR         | 0.201866667  | -0.1122      | 0.1981       | 0.149866667  | 0.054666667  |
| LOC728505    | 0.225933333  | 0.029466667  | -0.0547      | 0.1187       | 0.0213       |
| C19orf53     | -0.145833333 | -0.0434      | 0.033233333  | -0.074033333 | -0.0151      |
| LOC645174    | 0.002033333  | -0.057966667 | -0.0271      | -0.0353      | 0.020133333  |
| LOC100134424 | -0.052566667 | -0.1069      | 0.131266667  | -0.063733333 | -0.077866667 |
| LRP8         | 0.1785       | -0.0843      | 0.104533333  | 0.059466667  | -0.0353      |
| CCDC16       | -0.0004      | -0.0876      | -0.087333333 | 0.044966667  | -0.167833333 |
| WDR91        | -0.133066667 | -0.162866667 | -1.00E-04    | -0.120633333 | 6.00E-04     |
| LOC100128288 | -0.048666667 | 0.636766667  | 0.009933333  | 0.0382       | 0.291833333  |
| DDX39        | 0.243866667  | 0.030366667  | -0.034266667 | 0.153166667  | 0.1048       |
| SFRS8        | 0.1295       | 0.0989       | -0.039566667 | 0.226666667  | -0.0549      |
| SOLH         | 0.1294       | -0.0448      | 0.013133333  | 0.165566667  | 0.036666667  |
| SPANXA1      | -0.3727      | -0.030933333 | 0.3152       | -0.2685      | 0.102        |
| LOC729421    | -0.124533333 | -0.0869      | 0.015766667  | -0.060566667 | 0.031133333  |
| C19orf56     | -0.2023      | -0.001       | -0.001033333 | -0.056866667 | -0.061433333 |
| GNAI1        | 0.024366667  | -0.062766667 | -0.083666667 | 0.0084       | -0.045066667 |
| FAM122B      | 0.217933333  | -0.005966667 | -0.0598      | 0.055566667  | 0.152033333  |
| TGFB111      | -0.1196      | -0.109733333 | 0.1368       | -0.0421      | -0.032166667 |
| SH3PXD2B     | 0.086466667  | -0.105833333 | -0.092066667 | -0.011766667 | -0.030033333 |
| LOC440366    | 0.097233333  | -0.090033333 | 0.182333333  | 0.203666667  | -0.059266667 |
| ZNF407       | -0.0171      | 0.119433333  | -0.033133333 | 0.111766667  | 0.003866667  |
| ZDHHC24      | -0.188       | -0.0963      | 0.038266667  | -0.060133333 | -0.062633333 |
| LOC646909    | -0.304733333 | 0.201333333  | -0.559266667 | -0.3167      | 0.077033333  |
| DUSP12       | 0.173733333  | -0.083333333 | -0.229433333 | 0.0452       | -0.017933333 |
| STRBP        | 0.026333333  | 0.033066667  | -0.1422      | -0.005866667 | 0.123366667  |
| SLC2A8       | 0.2091       | 0.039966667  | 0.024733333  | 0.187033333  | -0.0762      |
| YTHDF3       | -0.019466667 | 0.0292       | 0.060666667  | -0.0241      | 0.136233333  |
| UNC50        | -0.114633333 | -0.013366667 | -0.067133333 | -0.1615      | -0.010233333 |
| HOXA5        | -0.4549      | -0.153966667 | 0.2538       | -0.4491      | -0.064966667 |
| FLJ14166     | 0.113266667  | 0.0927       | 0.059433333  | -0.049033333 | 0.110033333  |
| LOC391578    | 0.033433333  | -0.123333333 | -0.0187      | -0.0149      | -0.185266667 |
| CTTNBP2NL    | 0.0971       | -0.0019      | -0.037266667 | 0.0073       | 0.107466667  |
| CALCOCO1     | -0.1461      | -0.016166667 | -0.017733333 | -0.098633333 | -0.054466667 |
| LOC100133649 | -0.111866667 | 0.298466667  | -0.051566667 | -0.0441      | 0.071166667  |
| ARMCX2       | -0.061233333 | 0.066533333  | -0.0066      | -0.005733333 | 0.021233333  |
| HBXIP        | 0.0083       | -0.0393      | -0.002233333 | -0.0298      | -0.0038      |
| IDH3B        | 0.092966667  | -0.0602      | -0.044266667 | 0.023266667  | 0.108766667  |

|              |              |              |              |              |              |
|--------------|--------------|--------------|--------------|--------------|--------------|
| CCDC132      | -0.293833333 | -0.018       | -0.046666667 | -0.135566667 | 0.000866667  |
| ZBTB9        | 0.2455       | -0.045133333 | -0.072       | 0.207366667  | -0.082866667 |
| CRAMP1L      | 0.211866667  | -0.0376      | 0.027733333  | 0.1887       | -0.0518      |
| LOC729389    | 0.220666667  | -0.0136      | -0.153666667 | 0.037433333  | -0.0792      |
| CYB5B        | 0.17         | 0.080533333  | -0.008833333 | 0.042066667  | 0.0438       |
| SNX10        | -0.3148      | -0.141766667 | 0.205933333  | -0.331766667 | 0.063166667  |
| TP53BP1      | -0.0964      | -0.0043      | 0.038633333  | -0.0367      | -0.025633333 |
| SKP2         | 0.480766667  | 0.0583       | -0.147233333 | 0.316766667  | 0.0058       |
| ME2          | 0.0222       | 0.001366667  | -0.055166667 | 0.0595       | -0.046933333 |
| OTUD5        | -0.068733333 | -0.0608      | 0.1673       | 0.042866667  | 0.062766667  |
| WDR59        | -0.182866667 | -0.100133333 | 0.113433333  | -0.139066667 | -0.120733333 |
| PSMC5        | -0.019333333 | 0.057966667  | -0.015066667 | 0.025833333  | 0.2419       |
| LOC642771    | 0.1238       | -0.234133333 | 0.1177       | 0.0862       | -0.199066667 |
| SLC25A39     | -0.011466667 | -0.1121      | -0.044566667 | -0.000366667 | -0.076766667 |
| PIP3-E       | 0.046033333  | -0.149533333 | -0.030333333 | 0.0422       | -0.2459      |
| C1orf56      | -0.031066667 | 0.058266667  | -0.000533333 | 0.077633333  | 0.044766667  |
| ACADM        | -0.0261      | -0.138566667 | 0.1738       | -0.032633333 | -0.009533333 |
| C11orf84     | -0.0236      | 0.0796       | 0.108533333  | 0.1164       | -0.0261      |
| CDCA1        | 0.2879       | 0.165        | 0.097166667  | 0.273733333  | 0.125566667  |
| FJX1         | 0.719533333  | 0.148633333  | -0.237866667 | 0.650266667  | 0.0818       |
| MAGEA11      | -0.0382      | -0.162666667 | 0.086266667  | -0.056366667 | -0.037533333 |
| GRHPR        | -0.348533333 | -0.181933333 | 0.058        | -0.095266667 | -0.283966667 |
| HTRA2        | -0.1169      | -0.058933333 | 0.1535       | -0.024733333 | -0.0589      |
| LOC100130701 | 0.099966667  | -0.077066667 | 0.090633333  | 0.120666667  | 0.018333333  |
| SDHB         | 0.053466667  | -0.1192      | -0.049       | 0.034966667  | -0.038833333 |
| HMGCL        | -0.5645      | -0.1058      | 0.212966667  | -0.240833333 | -0.097466667 |
| CC2D1A       | -0.081366667 | -0.118166667 | -0.009766667 | -0.108766667 | -0.103733333 |
| ARMC10       | 0.080366667  | -0.053066667 | 0.0067       | -0.009966667 | 0.032566667  |
| LOC646103    | 0.1993       | -0.2361      | 0.148133333  | 0.123566667  | -0.202       |
| LOC100129742 | -0.162933333 | 0.050166667  | -0.0874      | -0.023633333 | -0.024533333 |
| PLEKHG4      | -0.1932      | -0.157766667 | 0.111233333  | -0.176266667 | -0.092866667 |
| MEF2C        | -0.074666667 | -0.036733333 | -0.0175      | -0.001766667 | -0.088566667 |
| MIR574       | -0.072666667 | 0.066633333  | -0.1784      | 0.067833333  | 0.070466667  |
| LOC730754    | -0.070466667 | 0.016533333  | -0.022433333 | 0.033533333  | -0.030333333 |
| ALG14        | 0.049366667  | -0.011633333 | -0.003866667 | -0.032766667 | 0.032533333  |
| PARP2        | 0.001533333  | 0.165433333  | -0.062       | 0.031733333  | 0.064366667  |
| FCGR3A       | 0.021766667  | 0.2594       | 0.0201       | 0.201433333  | 0.020666667  |
| RBM34        | -0.2585      | -0.034066667 | -0.1454      | -0.114133333 | -0.080233333 |
| LOC650276    | 0.0323       | 0.038366667  | 0.037333333  | 0.1142       | 0.029666667  |
| ILK          | -0.293166667 | 0.0122       | 0.066633333  | -0.172333333 | -0.053533333 |
| C11orf2      | -0.040933333 | 0.024233333  | 0.015433333  | -0.000366667 | 0.0472       |
| POM121C      | 0.057133333  | 0.0719       | 0.150833333  | 0.104933333  | 0.092466667  |
| C6orf64      | -0.019266667 | -0.0415      | -0.0504      | -0.0293      | 0.023733333  |
| FSD1         | 0.0131       | 0.087166667  | 0.149033333  | 0.057233333  | 0.067166667  |
| AGTR1        | -0.043       | 0.124333333  | -0.168966667 | -0.0524      | 0.1028       |
| SETD3        | 0.1857       | 0.090766667  | -0.0123      | 0.195566667  | 0.092366667  |
| CDK2         | 0.572033333  | 0.1196       | -0.0365      | 0.328733333  | 0.103333333  |

|              |              |              |              |              |              |
|--------------|--------------|--------------|--------------|--------------|--------------|
| UBTD2        | 0.160566667  | -0.007166667 | -0.004833333 | 0.1845       | -0.021833333 |
| PRPS1L1      | -0.0235      | 0.134833333  | -0.0932      | 0.019266667  | 0.1495       |
| RPS28        | -0.284633333 | -0.047733333 | -0.0138      | -0.1315      | 0.096266667  |
| IRX1         | -0.026666667 | -0.1371      | 0.066866667  | -0.097066667 | 0.053833333  |
| TRIM24       | 0.258266667  | 0.007166667  | -0.004433333 | 0.1794       | 0.027033333  |
| LOC643896    | -0.0103      | 0.116566667  | -0.137833333 | -0.030933333 | 0.160066667  |
| SMS          | 0.195366667  | 0.1573       | -0.095833333 | 0.148833333  | 0.0814       |
| ARIH1        | 0.037033333  | 0.033966667  | -0.013066667 | 0.1351       | 0.020133333  |
| KRAS         | -0.0283      | 0.033866667  | 0.055933333  | 0.0001       | 0.041966667  |
| RPL31        | -0.027566667 | -0.105566667 | -0.0132      | -0.0845      | -0.037033333 |
| FAM75C1      | -0.093733333 | -0.047266667 | 0.0806       | 0.054566667  | -0.139433333 |
| GCET2        | 0.0077       | -0.2455      | -0.070733333 | 0.1199       | -0.1826      |
| SCLY         | 0.08         | 0.1309       | -0.053066667 | 0.145233333  | 0.06         |
| KLF6         | 0.3601       | -0.1112      | 0.063033333  | 0.270866667  | -0.0275      |
| AIMP2        | 0.091166667  | 0.019166667  | -0.0974      | 0.0583       | 0.092433333  |
| ST5          | -0.1781      | -0.110266667 | 0.1332       | -0.029333333 | -0.095333333 |
| ZNF845       | -0.031866667 | 0.0453       | -0.0823      | -0.0099      | 0.1139       |
| LOC644063    | 0.193233333  | 0.031866667  | -0.006066667 | 0.105066667  | 0.080266667  |
| MKRN3        | 0.043233333  | -0.1092      | -0.021066667 | 0.028866667  | -0.048133333 |
| TMED2        | 0.110533333  | -0.0054      | 0.0203       | 0.189133333  | -0.062466667 |
| LOC100132593 | -0.032366667 | 0.0404       | -0.0369      | -0.0194      | 0.064533333  |
| LOC729366    | -0.0533      | 0.1608       | -0.325066667 | 0.0009       | 0.059266667  |
| RANBP9       | -0.009933333 | 0.103166667  | -0.0365      | 0.150033333  | 0.035466667  |
| LRP5L        | 0.038066667  | 0.0379       | -0.0144      | -0.017666667 | -0.008333333 |
| PPP2R5B      | -0.033666667 | -0.073       | 0.136366667  | -0.020466667 | 0.042533333  |
| TRUB2        | -0.055033333 | 0.031566667  | 5.78E-19     | -0.042933333 | 0.030666667  |
| CENPA        | 0.131233333  | 0.2669       | 0.047933333  | 0.3533       | 0.0648       |
| LOC391045    | 0.1268       | -0.076933333 | -0.026833333 | 0.180966667  | -0.0381      |
| SYTL4        | -0.051233333 | -0.027266667 | -0.048233333 | -0.262066667 | 0.008233333  |
| NFKBIL2      | 0.070066667  | 0.0668       | -0.006       | 0.061433333  | 0.046        |
| C15orf41     | -0.1297      | -0.005866667 | 0.1196       | -0.132666667 | 0.064833333  |
| DHX16        | 0.073433333  | 0.074233333  | -0.088233333 | 0.0306       | -0.031866667 |
| MBD1         | 0.0039       | -0.0695      | 0.148733333  | 0.0256       | 0.013266667  |
| UBAC1        | 0.1617       | 0.064        | -0.199266667 | 0.068933333  | -0.038766667 |
| GMNN         | 0.2367       | 0.126433333  | -0.112066667 | 0.1785       | 0.039566667  |
| RP2          | 0.086333333  | 0.13         | -0.0893      | 0.092933333  | 0.026033333  |
| ARMC8        | 0.0613       | 0.017566667  | -0.121733333 | 0.094        | -0.065033333 |
| LOC727865    | -0.221466667 | -0.0336      | -0.048333333 | -0.078266667 | -0.060333333 |
| H3F3B        | 0.372433333  | 0.103733333  | -0.1858      | 0.508833333  | -0.033766667 |
| LOC729513    | -0.310666667 | -0.0009      | 0.284866667  | -0.216566667 | -0.131966667 |
| LOC643802    | 0.0696       | 0.0389       | 0.057633333  | 0.141366667  | -0.118533333 |
| DENND5A      | 0.063733333  | -0.121866667 | -0.039766667 | 0.002533333  | -0.102566667 |
| SOAT1        | 0.1583       | -0.0734      | 0.0583       | 0.0927       | 0.199066667  |
| ZKSCAN4      | 0.002366667  | -0.0587      | -0.1035      | -0.013833333 | -0.150133333 |
| RRP1B        | 0.474766667  | 0.106866667  | -0.1972      | 0.372766667  | 0.0047       |
| FAM13B       | 0.114466667  | -0.113933333 | -0.237       | 0.028966667  | -0.017433333 |
| UBE3A        | 0.028166667  | 0.121466667  | 0.065133333  | 0.100466667  | 0.0268       |



|              |              |              |              |              |              |
|--------------|--------------|--------------|--------------|--------------|--------------|
| LOC391777    | -0.0476      | -0.0528      | 0.0296       | -0.123733333 | 0.0393       |
| SLK          | -0.004366667 | 0.0797       | 0.047        | 0.078133333  | 0.135133333  |
| LOC401218    | 0.2084       | -0.056033333 | -0.257566667 | 0.073633333  | -0.056833333 |
| NAT15        | 0.009366667  | -0.0357      | -0.1657      | 0.048766667  | -0.094533333 |
| BAGE5        | -0.234766667 | -0.082233333 | -0.006466667 | -0.112       | -0.1642      |
| CAPS2        | 0.060433333  | 0.0374       | 0.0281       | 0.120933333  | -0.0575      |
| FUK          | -0.2674      | -0.029966667 | 0.009633333  | -0.229766667 | -0.069466667 |
| SH2B1        | -0.168866667 | 0.0739       | -0.120033333 | -0.159566667 | -0.082033333 |
| HSF2BP       | 0.116233333  | 0.0804       | -0.1981      | 0.212033333  | 0.017566667  |
| LOC729020    | -0.0346      | 0.097766667  | -0.017566667 | -0.044533333 | 0.147433333  |
| COG5         | -0.295566667 | -0.089733333 | 0.110533333  | -0.1846      | -0.0596      |
| CCDC107      | 0.170733333  | -0.133633333 | 0.0379       | 0.0113       | 0.069333333  |
| MYOF         | 0.117233333  | -0.010833333 | -0.2064      | 0.128533333  | -0.039733333 |
| LOC654244    | 0.3139       | 0.112333333  | -0.2238      | 0.218        | 0.090633333  |
| LOC642446    | 0.049866667  | -0.039433333 | -0.042       | 0.2087       | -0.165033333 |
| PPAP2B       | -0.0197      | -0.1025      | 0.072433333  | 0.061233333  | -0.052166667 |
| ARHGAP11B    | 0.3029       | 0.025333333  | -0.043933333 | 0.2043       | -0.002133333 |
| C6orf57      | -0.125266667 | -0.078833333 | -0.001333333 | -0.116033333 | -0.0339      |
| LOC440359    | 0.169033333  | 0.046033333  | 0.089233333  | 0.1997       | 0.139433333  |
| RAP2C        | -0.165366667 | 0.030733333  | 0.0542       | -0.055766667 | 0.088666667  |
| DDX60        | -0.172833333 | -0.069966667 | -0.025433333 | 0.004566667  | -0.0542      |
| RNF31        | -0.0765      | 0.040066667  | 0.007533333  | -0.0945      | -0.129833333 |
| PIGV         | -0.326333333 | -0.012766667 | 0.120133333  | -0.187366667 | -0.1249      |
| AP3M1        | -0.1013      | -0.0614      | -0.161166667 | 0.0091       | -0.221733333 |
| DDX42        | 0.127033333  | 0.012333333  | -0.0981      | 0.052        | -0.078066667 |
| LOC389223    | 0.007933333  | 0.141366667  | -0.020333333 | 0.010333333  | 0.1246       |
| NDRG3        | -0.1369      | -0.081933333 | 0.1274       | -0.129433333 | 0.043066667  |
| P2RX4        | -0.066266667 | -0.036       | -0.049633333 | -0.022866667 | -0.063133333 |
| MAST2        | 0.056866667  | 0.029466667  | 0.057366667  | 0.0961       | 0.0955       |
| ALG12        | 0.015966667  | -0.0314      | 0.0523       | -0.0676      | -0.0068      |
| UQCRC1       | -0.154533333 | -0.152866667 | 0.118366667  | -0.136333333 | -0.061766667 |
| RRAGD        | -0.338766667 | -0.2418      | 0.1637       | -0.329866667 | -0.088066667 |
| LOC100133463 | 0.0882       | 0.0084       | -0.218633333 | 0.043133333  | -0.0405      |
| ALS2CR4      | -0.035433333 | 0.093366667  | 0.0831       | 0.0783       | -0.002833333 |
| B3GALNT2     | 0.147733333  | -0.041533333 | -0.032733333 | 0.1058       | 0.036833333  |
| SNORD55      | -0.0033      | 0.030566667  | -0.014233333 | 0.017166667  | 0.002233333  |
| HSD17B14     | -0.0129      | -0.067733333 | 0.014866667  | -0.054333333 | -0.0067      |
| RABL2A       | -0.265833333 | 0.171        | -0.076033333 | -0.144166667 | 0.1727       |
| KATNA1       | 0.079133333  | -0.001966667 | -0.1068      | -0.023133333 | -0.017666667 |
| GADD45GIP1   | -0.166733333 | 0.101866667  | 0.0934       | 0.0733       | -0.048266667 |
| ANO6         | 0.136733333  | 0.111366667  | 0.145066667  | 0.1205       | 0.132933333  |
| TMEM170A     | 0.2314       | 0.1507       | -0.0696      | 0.220833333  | 0.0955       |
| LRIG3        | 0.076633333  | 0.099666667  | 0.112666667  | 0.012066667  | 0.086966667  |
| LOC730187    | 0.069333333  | -0.096333333 | -0.054766667 | -0.013866667 | -0.0463      |
| SLC7A6       | 0.555566667  | 0.042166667  | -0.178       | 0.330733333  | 0.052166667  |
| HMGXB4       | 0.0836       | 0.159833333  | 0.012266667  | 0.1147       | 0.0237       |
| LOC284023    | 0.129866667  | 0.045766667  | -0.1733      | 0.083033333  | 0.0136       |

|              |              |              |              |              |              |
|--------------|--------------|--------------|--------------|--------------|--------------|
| PDLIM4       | -0.1303      | -0.029466667 | 0.243166667  | -0.209933333 | 0.1172       |
| MRPS18A      | -0.0753      | -0.070433333 | 0.0333       | -0.032866667 | -0.014133333 |
| MOCS2        | -0.022766667 | 0.020366667  | -0.002966667 | -0.0495      | 0.115866667  |
| LOC729090    | 0.011366667  | 0.1932       | -0.035       | 0.002066667  | 0.005666667  |
| NBPF14       | -0.038166667 | -4.00E-04    | 0.329866667  | 0.019266667  | -0.011333333 |
| LOC220433    | -0.276033333 | -0.080066667 | 0.0177       | -0.148966667 | -0.051066667 |
| CYP51A1      | -0.103766667 | 0.027933333  | -0.0258      | 0.004633333  | 0.044033333  |
| FLJ35776     | -0.008866667 | -0.016333333 | 0.020466667  | -0.056066667 | 0.1326       |
| LRRC56       | 0.036        | -0.1988      | -0.011633333 | -0.0011      | -0.1048      |
| LOC654260    | 0.1195       | -0.041466667 | -0.021233333 | 0.177533333  | -0.012566667 |
| COQ3         | 0.1608       | 0.042066667  | -0.121433333 | 0.0396       | 0.114233333  |
| ZNF140       | -0.0793      | 0.000366667  | -0.010066667 | -0.062866667 | 0.003666667  |
| DNAJC24      | -0.0348      | -0.1815      | 0.0606       | -0.0065      | -0.0095      |
| CLPP         | 0.180166667  | 0.017166667  | -0.0008      | 0.0617       | 0.109533333  |
| MLLT6        | 0.1259       | 0.0268       | -0.033833333 | 0.102766667  | 0.022066667  |
| FLOT2        | -0.264366667 | -0.0803      | 0.237666667  | -0.298966667 | 0.006133333  |
| CCNI         | -0.345166667 | -0.1153      | 0.181666667  | -0.212533333 | -0.020266667 |
| LOC644762    | 0.052133333  | 0.1018       | -0.087       | 0.095        | 0.06         |
| LOC646791    | 0.196033333  | -0.062433333 | -0.023633333 | 0.092266667  | 0.1316       |
| CBX3         | 0.0144       | 0.170466667  | 0.1559       | 0.2555       | 0.211333333  |
| LOC646819    | -0.031833333 | -0.007833333 | -0.116933333 | 0.013033333  | -0.100666667 |
| LOC100128295 | 0.145466667  | 0.0127       | -0.083033333 | -0.072366667 | 0.0747       |
| ERI2         | 0.014133333  | 0.083366667  | -0.1107      | 0.033366667  | 0.134833333  |
| C4orf23      | -0.042733333 | -0.2092      | -0.065066667 | -0.180133333 | 0.0119       |
| SAMD1        | 0.0338       | 0.0035       | 0.0818       | 0.087033333  | -0.033033333 |
| POLG         | 0.220666667  | 0.002766667  | -0.001666667 | 0.200066667  | 0.116033333  |
| ROD1         | 0.2029       | -0.071833333 | 0.065133333  | 0.169933333  | 0.032833333  |
| MTMR15       | 0.078766667  | 0.058733333  | -0.068966667 | 0.135533333  | -0.0028      |
| TRAPPC2      | -0.091433333 | -0.111433333 | 0.0022       | -0.100933333 | -0.078366667 |
| LOC642585    | 0.016666667  | 0.090933333  | -0.0882      | -0.066166667 | 0.035866667  |
| LOC643995    | 0.022033333  | 0.257633333  | -0.1013      | -0.0374      | 0.204533333  |
| LOC100128781 | 0.097333333  | 0.1602       | -0.0107      | 0.2796       | -0.065233333 |
| ENAH         | -0.087966667 | -0.0392      | 0.067833333  | -0.123966667 | -0.069933333 |
| LOC646483    | 0.121733333  | -0.1471      | 0.0326       | 0.040766667  | -0.063066667 |
| MC1R         | -0.171166667 | -0.003333333 | 0.143166667  | -0.198733333 | 0.023333333  |
| TMEM111      | -0.027866667 | -0.148433333 | 0.0185       | 0.036066667  | -0.030866667 |
| TXNDC5       | 0.3736       | -0.080966667 | 0.042633333  | 0.2115       | 0.045166667  |
| GBE1         | 0.068133333  | 0.058166667  | -0.028733333 | -0.1355      | 0.0961       |
| LOC100133312 | 0.016066667  | -0.1205      | -0.1208      | 0.0469       | -0.128266667 |
| C16orf58     | -0.2133      | -0.061733333 | 0.164566667  | -0.161066667 | 0.0329       |
| LOC727908    | -0.314433333 | -0.014       | 0.399666667  | -0.256766667 | -0.023766667 |
| LOC100130892 | -0.453833333 | 0.197766667  | -0.5267      | -0.350633333 | 0.116233333  |
| SETMAR       | 0.034466667  | 0.045466667  | -0.045433333 | 0.021433333  | -0.0294      |
| MSL3         | 0.0728       | -0.0509      | 0.0364       | -0.005466667 | 0.137233333  |
| LOC554203    | -0.623566667 | -0.2132      | 0.2209       | -0.4339      | -0.167433333 |
| ISCA1L       | 0.036133333  | -0.019966667 | -0.032233333 | 0.124866667  | -0.055266667 |
| DR1          | 0.313366667  | -0.103033333 | 0.178866667  | 0.194666667  | 0.1622       |

|              |              |              |              |              |              |
|--------------|--------------|--------------|--------------|--------------|--------------|
| CDC7         | 0.073533333  | 0.037733333  | -0.0951      | 0.049166667  | 0.095166667  |
| IPO7         | 0.252566667  | 0.258533333  | 0.008433333  | 0.3236       | 0.056866667  |
| LOC728748    | 0.0514       | 0.080033333  | -0.048366667 | 0.0978       | -0.0346      |
| MTP18        | 0.3021       | 0.1434       | -0.019866667 | 0.172833333  | 0.2449       |
| MTMR2        | 0.248866667  | -0.054266667 | -0.234433333 | 0.106933333  | 0.036933333  |
| VIL2         | 0.221466667  | -0.0235      | -0.008866667 | 0.205966667  | 0.031733333  |
| FBXO22       | -0.053       | 0.040833333  | 0.072933333  | -0.095466667 | 0.055666667  |
| PGS1         | -0.097       | 0.043933333  | -0.030466667 | -0.0507      | -0.059833333 |
| GPATCH8      | 0.149366667  | 0.040666667  | -0.1067      | 0.025266667  | 0.0529       |
| SFXN3        | -0.337766667 | 0.148933333  | -0.0035      | -0.0892      | -0.0195      |
| STAM2        | -0.0996      | 0.079833333  | -0.107733333 | 0.005766667  | -0.068866667 |
| C3orf1       | -0.1941      | -0.0475      | -0.126833333 | -0.212766667 | -0.0214      |
| ADIPOR2      | 0.016033333  | 0.003766667  | 0.131566667  | 0.0144       | -0.046033333 |
| EPAS1        | -0.100466667 | -0.078833333 | 0.069633333  | -0.112333333 | -0.008433333 |
| FAM111A      | 0.2599       | 0.031966667  | -0.1383      | 0.0341       | 0.020633333  |
| MGC52000     | -0.1355      | -0.069733333 | 0.040966667  | 0.021866667  | -0.136833333 |
| MGC5139      | 0.039433333  | -0.031966667 | -0.062433333 | 0.0768       | -0.016633333 |
| SF1          | 0.2777       | 0.032633333  | 0.070933333  | 0.2731       | 0.0855       |
| LOC100129093 | -0.001033333 | 0.1668       | -0.0119      | 0.1727       | 0.063466667  |
| CBR1         | 0.0021       | 0.060666667  | 0.013366667  | 0.004066667  | 0.177733333  |
| RBM9         | -0.369533333 | -0.0355      | 0.2027       | -0.298433333 | 0.049966667  |
| CBLL1        | 0.3301       | 0.029733333  | -0.1264      | 0.2047       | 0.0691       |
| RPS3         | 0.021866667  | -0.1204      | 0.0255       | 0.001666667  | 0.021066667  |
| LOC100130935 | -0.090833333 | -0.021266667 | -0.094233333 | -0.138533333 | -0.0051      |
| LOC644931    | 0.165833333  | -0.076066667 | -0.0467      | 0.0526       | 0.028066667  |
| TUBB4Q       | 0.303466667  | 0.183933333  | -0.163466667 | 0.100466667  | 0.256433333  |
| ZNF468       | -0.1372      | 0.4537       | -0.079366667 | -0.052666667 | 0.3372       |
| HCG2P7       | -0.0946      | 0.319966667  | -0.0343      | -0.021566667 | 0.0883       |
| RTN4         | -0.107966667 | 0.088033333  | 0.0177       | -0.059966667 | 0.1347       |
| PLEKHG3      | 0.150666667  | 0.0209       | -0.0642      | 0.128733333  | -0.026333333 |
| AP1S2        | 0.050866667  | -0.014933333 | -0.000633333 | -0.051166667 | 0.029566667  |
| BIRC7        | -0.016533333 | 0.006166667  | 0.002766667  | 0.026266667  | -0.032766667 |
| EXTL2        | -0.294666667 | -0.207133333 | 0.114366667  | -0.320033333 | -0.0287      |
| MMADHC       | 0.0552       | 0.0631       | 0.020166667  | 0.063733333  | 0.057166667  |
| B4GALT6      | -0.063233333 | 0.1672       | 0.1543       | -0.1001      | 0.174333333  |
| CKS1B        | 0.197766667  | -0.048266667 | -0.077966667 | 0.172733333  | 0.014633333  |
| ZDHHC17      | -0.031833333 | 0.052266667  | 0.050766667  | 0.098966667  | 0.018333333  |
| PRPF38B      | 0.225        | 0.117066667  | -0.056333333 | 0.158066667  | 0.154233333  |
| LOC728208    | 0.072        | 0.044133333  | 0.0235       | 0.089666667  | 0.106266667  |
| USE1         | 0.051933333  | -0.123233333 | -0.118566667 | -0.081133333 | 0.012233333  |
| FAH          | -0.0085      | -0.184766667 | -0.0278      | -0.0027      | -0.0433      |
| KIAA1279     | -0.121533333 | -0.0333      | -0.0508      | -0.1593      | 0.1812       |
| IL18         | -0.1247      | 0.449733333  | -0.111366667 | -0.0527      | 0.136333333  |
| PKIA         | -0.319433333 | 0.080433333  | 0.455966667  | -0.292033333 | 0.282033333  |
| SCAND2       | -0.068466667 | -0.078033333 | -0.088733333 | -0.109866667 | -0.026933333 |
| SNORD99      | 0.278566667  | 0.184133333  | -0.341833333 | 0.0879       | -0.0553      |
| LOC100128168 | -0.4122      | 0.254333333  | -0.3053      | -0.3752      | 0.360366667  |

|              |              |              |              |              |              |
|--------------|--------------|--------------|--------------|--------------|--------------|
| LOC645676    | 0.0609       | 0.0458       | -0.205966667 | 0.103933333  | 0.009233333  |
| TMEM231      | -0.120233333 | -0.056166667 | 0.0357       | -0.114033333 | 0.033533333  |
| LOC440589    | -0.004533333 | 0.107133333  | -0.0382      | 0.098466667  | 0.0074       |
| ARL17B       | 0.018933333  | -0.0323      | 0.0205       | -0.013533333 | 0.036633333  |
| RPL30        | -0.074966667 | -0.116033333 | 0.107466667  | 0.029833333  | 0.006466667  |
| FAM83D       | 0.1967       | 0.220933333  | -0.000866667 | 0.2546       | -0.024533333 |
| LOC100132496 | -0.4172      | 0.102966667  | -0.508233333 | -0.4348      | 0.130466667  |
| B4GALT2      | 0.344066667  | -0.0112      | 0.071866667  | 0.275933333  | 0.142633333  |
| CXorf12      | -0.3217      | -0.261066667 | 0.071766667  | -0.35        | 0.016266667  |
| SSU72        | -0.149233333 | -0.005633333 | 0.0887       | -0.078466667 | -0.032966667 |
| LOC648705    | 0.1675       | 0.0339       | -0.033233333 | 0.013633333  | -0.020566667 |
| PSMB8        | -0.210833333 | -0.053633333 | -0.011133333 | -0.156466667 | -0.094433333 |
| WDR13        | -0.258266667 | -0.239833333 | -0.1292      | -0.2222      | -0.088633333 |
| SNX29        | -0.2375      | -0.073633333 | 0.033633333  | -0.095666667 | -0.052633333 |
| ATP6AP1      | -0.0864      | -0.150766667 | -0.018966667 | -0.140266667 | -0.0545      |
| LOC441506    | -0.302233333 | 0.108533333  | -0.199266667 | -0.143133333 | 0.0632       |
| LRRC45       | 0.136233333  | -0.0614      | -0.096833333 | 0.027766667  | 0.071666667  |
| C3orf75      | 0.2019       | 0.016933333  | 0.006366667  | 0.0057       | 0.070666667  |
| C12orf45     | 0.303666667  | 0.021733333  | -0.187566667 | 0.2188       | 0.113333333  |
| IQSEC1       | 0.165833333  | -0.035533333 | 0.011533333  | 0.162766667  | -0.021333333 |
| KIAA1737     | 0.070266667  | -0.049666667 | -0.166866667 | 0.094166667  | 0.018766667  |
| RPS6KA2      | -0.2007      | -0.151233333 | -0.007133333 | -0.134733333 | -0.140766667 |
| UNC93B1      | -0.2312      | -0.1284      | 0.121433333  | -0.085366667 | -0.145766667 |
| LRP12        | 0.0105       | -0.017466667 | 0.109366667  | 0.065766667  | -0.0459      |
| C3orf23      | 0.157766667  | 0.0739       | -0.240533333 | 0.066466667  | -0.000833333 |
| HSPA2        | 0.036166667  | -0.061166667 | -0.018133333 | -0.2043      | 0.1698       |
| SNPH         | -0.0354      | 0.018166667  | -0.207766667 | -0.180633333 | 0.051766667  |
| LOC653631    | 0.1302       | 0.230866667  | -0.0593      | 0.198033333  | 0.070133333  |
| MRPS17       | 0.113866667  | 0.015633333  | 0.1316       | 0.0616       | 0.1682       |
| C14orf85     | -0.095066667 | 0.526866667  | 0.0199       | -0.0145      | 0.2429       |
| C3orf38      | 0.0547       | 0.081833333  | -0.1091      | 0.055133333  | -0.0528      |
| TTC35        | -0.099066667 | 0.054266667  | -0.0263      | -0.135166667 | 0.1462       |
| LOC401115    | -0.2097      | -0.0909      | 0.1425       | -0.1073      | -0.029733333 |
| SLC2A1       | 0.418166667  | 0.044533333  | -0.144266667 | 0.2681       | 0.0743       |
| C20orf127    | -0.076666667 | -0.0769      | 0.004233333  | 0.015266667  | -0.037166667 |
| LOC645586    | 0.018766667  | -0.0066      | -0.0277      | 0.0387       | 0.0174       |
| FLAD1        | 0.0286       | -0.039566667 | -0.087466667 | -0.0519      | -0.011833333 |
| LSM1         | 0.113366667  | -0.0556      | -0.009866667 | 0.0473       | 0.038733333  |
| NDUFA10      | -0.147833333 | 0.015433333  | -0.0773      | -0.002633333 | -0.1337      |
| LOC727758    | 0.0803       | 0.117866667  | 0.039733333  | 0.1039       | 0.056533333  |
| NAP1L5       | -0.011       | -0.010466667 | -0.056833333 | -0.005966667 | -0.015566667 |
| SQLE         | 0.217333333  | 0.146833333  | 0.104233333  | 0.249233333  | 0.184733333  |
| LOC285550    | 0.0436       | 0.0102       | -0.3827      | -0.1096      | 0.0371       |
| CETN2        | -0.1715      | -0.0877      | 0.0027       | -0.194833333 | -0.032433333 |
| TCEAL8       | -0.284333333 | -0.1209      | 0.025966667  | -0.349133333 | -0.0221      |
| APOL3        | 0.0118       | -0.047233333 | -0.083266667 | -0.035166667 | 0.024533333  |
| ZNF408       | 0.086733333  | -0.0609      | 0.0124       | 0.143933333  | -0.058866667 |

|              |       |              |              |              |              |              |
|--------------|-------|--------------|--------------|--------------|--------------|--------------|
| PPIF         |       | 0.290466667  | 0.0967       | -0.293233333 | 0.187766667  | 0.0425       |
| LOC728492    |       | 0.013233333  | -0.055033333 | 0.030366667  | -0.096033333 | 0.046066667  |
| ANKMY1       |       | 0.0353       | -0.214366667 | -0.0029      | -0.0451      | -0.020033333 |
| LOC644919    |       | -0.469066667 | -0.079433333 | 0.177366667  | -0.3788      | 0.001033333  |
| CDC5L        |       | 0.081933333  | 0.071633333  | -0.043666667 | 0.168233333  | 4.00E-04     |
| ETS2         |       | 0.170166667  | -0.036533333 | 0.004433333  | 0.1941       | -0.046366667 |
|              | 6-Sep | 0.175566667  | -0.0041      | 0.0896       | 0.082733333  | 0.3511       |
| SESN1        |       | -0.1017      | -0.0694      | -0.1009      | -0.129966667 | -0.029966667 |
| SFRS3        |       | 0.011133333  | 0.211033333  | -0.189233333 | 0.0342       | 0.1005       |
| FBXO3        |       | -0.076733333 | -0.024566667 | -0.0605      | 0.001233333  | -0.026233333 |
| LOC402562    |       | -0.0784      | 0.204866667  | -0.1015      | 0.056        | 0.190433333  |
| SFRS7        |       | -0.141       | 0.256633333  | 0.188        | -0.1241      | 0.1957       |
| POLR2J       |       | 0.239966667  | 0.093433333  | -0.113633333 | 0.164333333  | 0.075033333  |
| ZNF83        |       | -0.076466667 | 0.080533333  | -0.1509      | -0.0483      | -0.032466667 |
| TMEM184C     |       | -0.0954      | 0.043233333  | -0.063566667 | -0.084933333 | 0.065933333  |
| NECAP1       |       | 0.069266667  | 0.098866667  | -0.219733333 | 0.0126       | -0.0097      |
| CYCS         |       | 0.0093       | -0.0477      | -0.084333333 | 0.082133333  | -0.054233333 |
| LDHC         |       | -0.1414      | -0.026033333 | -0.192966667 | -0.101566667 | 0.061466667  |
| RPS6KC1      |       | -0.296933333 | 0.084733333  | 0.040466667  | -0.0988      | -0.042866667 |
| NPTN         |       | 0.031266667  | -0.218333333 | 0.1119       | 0.074666667  | 0.005733333  |
| PAPD4        |       | -0.234833333 | -0.0066      | -0.053666667 | -0.239133333 | -0.005266667 |
| C11orf68     |       | -0.008033333 | -0.019366667 | -0.118866667 | -0.021566667 | 0.006533333  |
| RNPS1        |       | 0.329866667  | 0.037        | 0.027866667  | 0.2345       | -0.012566667 |
| C6orf129     |       | -0.230966667 | -0.0968      | 0.182233333  | -0.186666667 | -0.006766667 |
| IFI6         |       | -0.098633333 | -0.0969      | 0.066966667  | -0.061833333 | -0.112033333 |
| EMX2         |       | 0.155166667  | 0.052        | -0.024366667 | 0.063733333  | 0.099366667  |
| C14orf129    |       | -0.1053      | -0.029066667 | 0.053466667  | -0.0889      | 0.194833333  |
| EMX2OS       |       | -0.102966667 | -0.009466667 | 0.050566667  | 0.0293       | -0.1016      |
| PPP1R12A     |       | 0.0816       | 0.102366667  | -0.066566667 | 0.193366667  | 0.079833333  |
| LOC729841    |       | -0.070133333 | -0.082133333 | 0.089766667  | -0.0477      | -0.009966667 |
| DYNC1I2      |       | -0.028766667 | 0.071933333  | 0.016233333  | 0.0089       | 0.016266667  |
| FAM40A       |       | 0.079433333  | -0.094166667 | -0.052066667 | -0.011866667 | 0.030133333  |
| NPL          |       | 0.0231       | -0.040033333 | -0.139166667 | -0.115333333 | 0.027966667  |
| LOC647104    |       | -0.057566667 | -0.141233333 | -0.159733333 | -0.176933333 | -0.051       |
| ZNF33B       |       | 0.0597       | -0.085233333 | 0.012033333  | 0.043333333  | -0.063       |
| PHKB         |       | -0.232633333 | -0.0881      | 0.094666667  | -0.233433333 | 0.002766667  |
| LOC100130746 |       | -0.178       | 0.152833333  | -0.2895      | -0.1717      | 0.090333333  |
| LOC645289    |       | -0.189133333 | 0.038633333  | -0.264533333 | -0.324       | 0.142366667  |
| FAM38B       |       | 0.002066667  | -0.0632      | -0.002166667 | -0.0522      | 0.0475       |
| AURKA        |       | 0.135933333  | 0.202266667  | 0.0051       | 0.2409       | 0.0262       |
| WDR25        |       | -0.208166667 | -0.132133333 | -0.154166667 | -0.209166667 | -0.082233333 |
| LRCH4        |       | 0.0651       | 0.017866667  | 0.035933333  | 0.0403       | 0.069233333  |
| RNU4-1       |       | -0.3291      | -0.057133333 | 0.289033333  | -0.051266667 | -0.010666667 |
| PSEN1        |       | 0.011233333  | 0.024266667  | -0.202466667 | -0.0315      | 0.0357       |
| C3orf14      |       | 0.040433333  | 0.289966667  | -0.261066667 | -0.0078      | 0.1058       |
| KIAA0141     |       | -0.191966667 | -0.166       | -0.062766667 | -0.015766667 | -0.1886      |
| ICT1         |       | 0.050266667  | 0.070033333  | 0.031133333  | 0.057933333  | -0.031833333 |

|              |              |              |              |              |              |
|--------------|--------------|--------------|--------------|--------------|--------------|
| C14orf45     | -0.088933333 | 0.0043       | -0.029933333 | -0.0682      | 0.060466667  |
| LOC653590    | 0.065366667  | -0.065966667 | 0.224666667  | 0.1023       | 0.1038       |
| SRP9         | -0.009       | 0.090533333  | 0.1128       | -0.106933333 | 0.148366667  |
| MRPS10       | -0.2622      | -0.044333333 | -0.074633333 | -0.1966      | -0.0961      |
| INVS         | -0.2705      | -0.0225      | 0.041633333  | -0.174133333 | -0.036433333 |
| WDR33        | -0.150166667 | 0.113066667  | 0.023433333  | 0.029        | 0.002233333  |
| C6orf111     | 0.0395       | 0.2021       | -0.251966667 | -0.000966667 | 0.009966667  |
| RSL24D1      | -0.013266667 | -0.162266667 | -0.129766667 | -0.035366667 | -0.129333333 |
| LOC100127922 | -0.117333333 | 0.2127       | -0.030066667 | 0.104966667  | 0.202166667  |
| DIP2C        | -0.021533333 | -0.023233333 | -0.000866667 | 0.014233333  | 0.043466667  |
| ATP1B1       | 0.063066667  | -0.0197      | -0.1482      | 0.1112       | -0.0788      |
| MRPL20       | 0.252733333  | 0.0164       | -0.072766667 | 0.189166667  | -0.010266667 |
| PCDHB16      | -0.253       | 0.091033333  | 0.031766667  | -0.194       | 0.0725       |
| POLR3GL      | -0.509933333 | -0.081633333 | 0.163233333  | -0.235133333 | 0.061233333  |
| DUSP18       | -0.1229      | -0.172166667 | 0.0689       | -0.076733333 | -0.111466667 |
| WASF3        | 0.2308       | -0.0373      | 0.029866667  | 0.2001       | 0.021433333  |
| LOC344595    | 0.1409       | -0.076233333 | -0.136       | 0.199833333  | -0.036833333 |
| SSB          | 0.120166667  | 0.092366667  | -0.0039      | 0.166733333  | 0.088266667  |
| PPT1         | -0.061366667 | -0.072766667 | -0.0151      | 0.0071       | -0.011766667 |
| ZRANB2       | 0.0562       | -0.106366667 | -0.0574      | -0.057333333 | 0.105533333  |
| USP42        | 0.0735       | 0.010933333  | 0.160866667  | 0.1598       | -0.078166667 |
| TMX1         | 0.206933333  | -0.4313      | 0.206366667  | 0.105533333  | -0.0333      |
| LOC641972    | 0.028866667  | -0.086066667 | 0.140066667  | -0.113833333 | 0.099566667  |
| NEFL         | -0.068533333 | -0.042466667 | -0.0219      | -0.2505      | -0.023233333 |
| VKORC1       | -0.0048      | -0.0134      | -0.093766667 | 0.0141       | -0.056033333 |
| C14orf169    | 0.139666667  | 0.0584       | -0.1199      | 0.178        | -0.107433333 |
| IDH3A        | 0.252466667  | -0.045466667 | -0.026533333 | 0.084133333  | 0.109133333  |
| TRAF7        | -0.131466667 | -0.089733333 | 0.1662       | -0.094866667 | -0.037466667 |
| XPA          | -0.060666667 | 0.0413       | -0.198166667 | -0.006066667 | -0.032433333 |
| DDT          | -0.1437      | -0.123333333 | 0.062633333  | -0.1841      | -0.053133333 |
| C22orf40     | 0.071666667  | -0.0625      | -0.053333333 | 0.064533333  | -0.045933333 |
| CMTM7        | -0.109433333 | 0.1022       | 0.7055       | -0.031033333 | 0.186733333  |
| TOR3A        | 0.302633333  | -0.014633333 | -0.140333333 | 0.106033333  | -0.112333333 |
| DPP9         | 0.0967       | -0.042766667 | 0.058633333  | 0.194533333  | 0.019266667  |
| CFLAR        | -0.209333333 | -0.114133333 | 0.234566667  | 0.002166667  | -0.169566667 |
| SSBP3        | -0.130366667 | -0.009333333 | 0.129933333  | -0.063633333 | 0.0118       |
| LOC100133866 | 0.0078       | -0.137333333 | 0.0224       | -0.006866667 | -0.0385      |
| TOP1         | 0.1347       | 0.2844       | 0.173733333  | 0.348933333  | 0.094033333  |
| TCEAL3       | -0.1112      | -0.0182      | 0.090466667  | -0.028533333 | 0.0067       |
| QRICH1       | 0.008166667  | 0.077333333  | -0.022566667 | 0.0627       | 0.136533333  |
| RBM5         | -0.074833333 | 0.056933333  | -0.095266667 | -0.057866667 | -0.051433333 |
| CENPL        | 0.240966667  | 0.146666667  | -0.054933333 | 0.222566667  | -0.022266667 |
| RNF141       | -0.0159      | -0.2499      | 0.077733333  | -0.1647      | -0.1922      |
| IARS         | -0.080066667 | -0.051733333 | -0.108466667 | -0.116533333 | -0.0846      |
| EIF3M        | -0.1174      | 0.1688       | -0.068166667 | 0.018966667  | 0.016166667  |
| NAAA         | -0.113666667 | -0.283566667 | -0.001666667 | -0.1923      | -0.127633333 |
| RRM2         | 0.9206       | 0.1621       | -0.392666667 | 0.532433333  | 0.058233333  |

|              |              |              |              |              |              |
|--------------|--------------|--------------|--------------|--------------|--------------|
| PYCARD       | 0.0345       | -0.0206      | -0.004833333 | -0.0145      | 0.0882       |
| LOC100129139 | -0.012433333 | 0.417766667  | -0.3516      | -0.0404      | 0.335166667  |
| RNASEL       | -0.120833333 | -0.139466667 | -0.070966667 | -0.174033333 | 0.0718       |
| BUB1         | 0.0953       | 0.240466667  | -0.059766667 | 0.2614       | -0.0097      |
| SLC16A3      | -0.2026      | 0.093366667  | 0.6887       | -0.113433333 | 0.175533333  |
| RAB35        | 0.2418       | -0.118633333 | -0.0023      | 0.148733333  | -0.035933333 |
| LOC653189    | -0.079933333 | 0.063433333  | -0.068366667 | 0.0704       | -0.055733333 |
| NMI          | -0.161533333 | -0.088233333 | 0.028266667  | -0.247666667 | -0.0293      |
| STRN         | 0.076933333  | -0.0453      | 0.022        | 0.130033333  | 0.024        |
| MTO1         | 0.044966667  | -0.115266667 | -0.221533333 | 0.0634       | -0.164933333 |
| SH3YL1       | -0.057166667 | -0.155966667 | 0.042266667  | -0.095566667 | 0.021933333  |
| ELMOD1       | -0.185133333 | -0.140566667 | -0.0309      | -0.258766667 | -0.1472      |
| PPCS         | -0.4163      | -0.0402      | 0.0471       | -0.2313      | -0.096166667 |
| KCTD14       | 0.0075       | -0.010966667 | 0.039        | -0.000966667 | 0.008033333  |
| ZNF283       | 0.110833333  | 0.124466667  | -0.027033333 | 0.1153       | 0.0292       |
| SNORD87      | 0.008233333  | 0.2225       | -0.217166667 | -0.0018      | 0.0498       |
| OSBPL9       | -0.179533333 | -0.021       | -0.053766667 | -0.109166667 | -0.071566667 |
| TMEM165      | 0.061433333  | -0.0235      | 0.069433333  | 0.014466667  | 0.021        |
| CIAPIN1      | 0.1191       | -0.015733333 | -0.242633333 | 0.102033333  | -0.204233333 |
| CLNS1A       | 0.065166667  | 0.014366667  | 0.062833333  | 0.054633333  | 0.057733333  |
| LOC729816    | -0.000766667 | 0.0826       | 0.038533333  | 0.023133333  | 0.137066667  |
| PDCD6        | 0.0111       | -0.0273      | 0.030233333  | 0.021766667  | -0.046866667 |
| ERCC8        | -0.026233333 | -0.000466667 | -0.006566667 | 0.0268       | 0.000433333  |
| LOC100132528 | 0.071966667  | -0.016866667 | 0.0917       | 0.121        | -0.032166667 |
| MEX3D        | 0.291133333  | -0.016633333 | 0.0748       | 0.190566667  | 0.0423       |
| SNORA11D     | 0.027633333  | -0.038666667 | 0.110433333  | -0.016566667 | 0.103866667  |
| LOC100133600 | -0.060333333 | -0.079166667 | -0.003033333 | 0.003033333  | -0.106166667 |
| C2orf34      | -0.188833333 | -0.1401      | 0.089166667  | -0.1637      | -0.1603      |
| YY1AP1       | 0.010366667  | 0.097833333  | -0.062033333 | 0.163333333  | -0.0641      |
| BOK          | -0.202266667 | -0.196033333 | 0.1495       | -0.213833333 | 0.027366667  |
| LOC391532    | -0.139133333 | 0.0555       | 0.032566667  | -0.0491      | 0.0016       |
| EIF4EBP1     | -0.016766667 | -0.019366667 | -0.1486      | -0.059       | -0.067666667 |
| MRPS14       | -0.1068      | 0.009066667  | -0.048933333 | -0.004766667 | -0.023466667 |
| OAF          | -0.2687      | -0.111233333 | 0.486966667  | -0.116133333 | -0.0792      |
| TMEM115      | 0.011233333  | -0.004566667 | -0.0937      | 0.105433333  | -0.079966667 |
| ZFP36L1      | -0.4483      | -0.044333333 | 0.1505       | -0.2163      | -0.166833333 |
| NAPEPLD      | -0.0144      | -0.088666667 | 0.0179       | -0.1268      | -0.018666667 |
| KCTD2        | 0.078633333  | -0.103433333 | 0.046233333  | 0.037066667  | -0.0011      |
| C17orf100    | -0.238066667 | -0.125366667 | 0.1331       | -0.164433333 | -0.032533333 |
| EIF4EBP3     | -0.0964      | -0.049066667 | 0.060733333  | -0.151133333 | 0.008233333  |
| LPAR2        | -0.1043      | -0.0363      | -0.083866667 | -0.1338      | -0.222566667 |
| ALDH3B1      | -0.463033333 | -0.2169      | 0.293233333  | -0.270566667 | -0.111466667 |
| PPARGC1A     | -0.0708      | -0.079366667 | -0.035433333 | -0.0459      | -0.0365      |
| ARHGEF5L     | 0.0416       | -0.016366667 | -0.005233333 | 0.001533333  | 0.0367       |
| ZC3H11A      | -0.027833333 | 0.191833333  | -0.0478      | 0.075433333  | 0.011033333  |
| MEN1         | 0.118866667  | 0.083433333  | -0.007866667 | 0.089366667  | 0.0655       |
| TBRG4        | 0.139466667  | 0.0882       | 0.009433333  | 0.021933333  | 0.0898       |

|              |              |              |              |              |              |
|--------------|--------------|--------------|--------------|--------------|--------------|
| DDOST        | -0.134833333 | -0.096333333 | 0.009966667  | -0.139033333 | 0.0329       |
| CUL5         | -0.085933333 | -0.155033333 | 0.1221       | -0.0909      | 0.151833333  |
| LOC339843    | -0.027       | -0.071566667 | 0.0675       | -0.0128      | 0.022133333  |
| ZFY          | -0.033066667 | 0.070666667  | 0.0729       | -0.0294      | 0.085033333  |
| DRAM1        | -0.179466667 | -0.1384      | 0.0531       | -0.066933333 | -0.040266667 |
| LOC649821    | -0.027233333 | 0.0402       | -0.0178      | 0.115833333  | -0.0759      |
| L3MBTL3      | 0.063333333  | 0.054933333  | -0.0551      | 0.053133333  | 0.034533333  |
| VPS28        | -0.216733333 | -0.2626      | 0.2304       | -0.1314      | -0.138966667 |
| C12orf77     | 0.009833333  | -0.0136      | -0.013033333 | 0.0294       | 0.0089       |
| PTMA         | -0.064533333 | 0.2984       | -0.159966667 | -0.022633333 | 0.19         |
| LOC729259    | -0.128233333 | 0.0254       | -0.187733333 | -0.136033333 | -0.020366667 |
| ACVR2A       | 0.086133333  | -0.203666667 | -0.074266667 | -0.056866667 | 0.026933333  |
| LOC100132106 | 0.085933333  | -0.170066667 | 0.045466667  | 0.1493       | -0.238566667 |
| LOC391132    | 0.058966667  | -0.0845      | -0.017866667 | 0.0132       | -0.055033333 |
| FAM10A4      | -0.267966667 | 0.028266667  | -0.058733333 | -0.178433333 | 0.068        |
| PNPLA8       | -0.264966667 | -0.023266667 | -0.046433333 | -0.309466667 | 0.165133333  |
| KIAA0020     | 0.1976       | 0.051033333  | -0.0166      | 0.122633333  | -0.006333333 |
| BCAN         | 0.294433333  | 0.125833333  | 0.026933333  | 0.185        | 0.167033333  |
| MIR1974      | 0.037233333  | -0.2157      | 0.974266667  | 0.538533333  | 0.0852       |
| IL7          | 0.148333333  | 0.031        | 0.011366667  | -0.013933333 | 0.114633333  |
| IL17RC       | -0.1192      | -0.103866667 | 0.041533333  | -0.1153      | -0.085       |
| AMOTL2       | 0.0471       | -0.066633333 | -0.035566667 | 0.0886       | -0.090766667 |
| REP15        | -0.2637      | 0.028466667  | 0.3382       | 0.0785       | -0.0643      |
| PDF          | -0.138966667 | 0.029533333  | -0.211766667 | -0.154966667 | -0.027066667 |
| OR9A4        | 0.109833333  | -0.021733333 | -0.115833333 | 0.059033333  | -0.011433333 |
| CEP72        | 0.1388       | -0.034833333 | -5.78E-19    | 0.049766667  | 0.044433333  |
| MATN2        | 0.0092       | -0.045833333 | -0.018433333 | 0.059466667  | -0.034466667 |
| JMJD2A       | -0.070966667 | -0.128566667 | -0.165533333 | -0.091666667 | -0.2592      |
| MAMLD1       | 0.083633333  | 0.031233333  | -0.205566667 | -0.071066667 | -0.0069      |
| C2orf7       | 0.0149       | 0.1513       | -0.201866667 | 0.046333333  | 0.0322       |
| LOC338799    | -0.2176      | -0.064133333 | -0.126266667 | -0.253133333 | 0.009366667  |
| NAT9         | -0.038       | 0.0092       | -0.057833333 | 0.105033333  | -0.076       |
| POLR2J3      | 0.076766667  | -0.040966667 | -0.0654      | 0.016766667  | 0.1026       |
| HEXDC        | -0.242166667 | 0.028066667  | -0.036133333 | -0.122433333 | -0.051233333 |
| LRIG2        | 0.030066667  | 0.009033333  | 0.02         | 0.112233333  | -0.0682      |
| FAM103A1     | -0.1122      | 0.0361       | -0.046733333 | -0.050766667 | 0.024933333  |
| LOC649801    | 0.083066667  | 0.286166667  | -0.104066667 | 0.119966667  | 0.219066667  |
| ANKRD12      | -0.107666667 | -0.115233333 | 0.046066667  | -0.110766667 | -0.032766667 |
| LOC644094    | -0.1308      | 0.1634       | -0.104866667 | 0.0183       | 0.037        |
| C17orf101    | -0.051       | -0.0664      | -0.1627      | -0.119533333 | -0.0822      |
| SHPK         | 0.363633333  | -0.011766667 | -0.125666667 | 0.174766667  | 0.028633333  |
| LOC100132139 | 0.0326       | 0.021133333  | -0.104933333 | 0.048366667  | 0.010766667  |
| PPIAL4A      | 0.013133333  | 0.067166667  | -0.071766667 | 0.024233333  | 0.009633333  |
| NKX2-5       | 0.336833333  | 0.014        | -0.023466667 | 0.330666667  | 0.038666667  |
| OLFML3       | -0.0246      | -0.033966667 | 0.209666667  | 0.1805       | -0.0403      |
| NBAS         | -0.167466667 | -0.0247      | -0.025533333 | -0.0229      | -0.0993      |
| PRKCSH       | 0.089833333  | 0.022766667  | -0.0118      | 0.0895       | 0.011166667  |



|           |              |              |              |              |              |
|-----------|--------------|--------------|--------------|--------------|--------------|
| MGEA5     | -0.347166667 | -0.0479      | -0.002666667 | -0.245133333 | -0.103333333 |
| THEM5     | 0.076066667  | 0.071266667  | 0.017166667  | -0.002       | -0.034433333 |
| LOC642817 | 0.171566667  | 0.013133333  | -0.020466667 | 0.0728       | -0.0321      |
| ASPHD1    | -0.024466667 | -0.037       | -0.005633333 | 0.0012       | 0.030933333  |
| MYOM2     | -0.007633333 | -0.049466667 | -0.040733333 | -0.004866667 | -0.069366667 |
| HOXA6     | -0.263566667 | -0.067766667 | 0.122        | -0.190966667 | -0.030166667 |
| C14orf133 | -0.0553      | 0.0162       | -0.023166667 | -0.136566667 | 0.178433333  |
| C20orf196 | -0.168633333 | 0.014333333  | 0.010866667  | -0.0935      | -0.014733333 |
| PAK1      | 0.071866667  | -0.023666667 | 0.093533333  | 0.0802       | -0.079233333 |
| ZNF317    | 0.277633333  | 0.020666667  | -0.108366667 | 0.183433333  | 0.009033333  |
| FBXW5     | -0.0115      | -0.0421      | -0.047333333 | -0.028766667 | -0.118033333 |
| PFKFB3    | 0.093433333  | 0.0436       | 0.320366667  | 0.222866667  | 0.082933333  |
| MAP2K7    | -0.125833333 | 0.134033333  | 0.1173       | 0.0882       | -0.004333333 |
| METTL4    | -0.058033333 | -0.0455      | -0.003066667 | -0.0379      | 0.0073       |
| ERAL1     | 0.151033333  | -0.0093      | 0.0044       | 0.019633333  | 0.0057       |
| LRPPRC    | -0.109466667 | 0.007666667  | -0.064233333 | -0.035566667 | -0.088       |
| KIAA1271  | -0.037833333 | -0.144233333 | -0.024466667 | -0.1409      | -0.0779      |
| CNOT7     | 0.197333333  | 0.0629       | -0.1126      | 0.171533333  | 0.0283       |
| TOP3B     | -0.062366667 | -0.142866667 | -0.061966667 | -0.1172      | -0.028233333 |
| ATP5J2    | -0.092133333 | -0.0476      | 0.130166667  | -0.066066667 | 0.0125       |
| ZFYVE20   | -0.036233333 | -0.118666667 | -0.004533333 | -0.0007      | -0.0597      |
| SCAMP3    | -0.1702      | -0.006966667 | 0.050266667  | -0.0792      | 0.0574       |
| SCFD2     | 0.0141       | -0.017666667 | 0.022433333  | -0.1104      | 0.0209       |
| PNPT1     | -0.133766667 | 0.672933333  | -0.3501      | -0.116533333 | 0.149066667  |
| LOC134997 | -0.053233333 | 0.079666667  | 0.0164       | 0.0822       | -0.0799      |
| EPHB2     | 0.032433333  | 0.156433333  | -0.0446      | -0.030166667 | 0.022266667  |
| LOC150223 | 0.196233333  | 0.036666667  | -0.065833333 | 0.146933333  | 0.014566667  |
| MRPL50    | 0.1169       | -0.012433333 | 0.047133333  | 0.088566667  | 0.0545       |
| KIAA1586  | 0.089566667  | 0.114033333  | -0.038033333 | 0.026166667  | 0.087166667  |
| UFSP2     | -0.3209      | -0.0552      | 0.174366667  | -0.2459      | -0.019666667 |
| WDR55     | 0.0994       | 0.1085       | -0.1034      | -0.0472      | -0.006       |
| MTDH      | -0.061866667 | 0.046133333  | -0.058833333 | -0.020466667 | 0.037566667  |
| SAP30     | 0.029666667  | 0.149666667  | -0.073233333 | 0.036366667  | 0.139333333  |
| HGSNAT    | -0.000466667 | -0.0871      | -0.0908      | -0.128166667 | -0.0107      |
| PAQR7     | 0.1917       | -0.050333333 | -0.007833333 | 0.111033333  | -0.042833333 |
| UTP3      | 0.041533333  | 0.117166667  | -0.034833333 | 0.0578       | 0.1396       |
| PRPF4B    | 0.0877       | 0.083366667  | -0.0574      | 0.032733333  | 0.111333333  |
| CFL1      | 0.037933333  | -0.027566667 | -0.025633333 | 0.011166667  | 0.052866667  |
| DNAJC11   | 0.2652       | -0.033133333 | 0.0331       | 0.111766667  | 0.168133333  |
| ANAPC5    | -0.019433333 | -0.151066667 | 0.0585       | -0.073066667 | -0.161633333 |
| RAPH1     | 0.3243       | 0.2788       | -0.095233333 | 0.169833333  | 0.137866667  |
| SNORA25   | 0.1439       | 0.159766667  | -0.271733333 | -0.0639      | 0.081        |
| ADCY3     | 0.202766667  | -0.051066667 | 0.105033333  | 0.159666667  | 0.050633333  |
| IMPACT    | -0.129133333 | -0.045433333 | -0.058533333 | -0.182733333 | 0.074866667  |
| RRP12     | 0.225733333  | -0.033333333 | -0.168666667 | -0.010033333 | 0.016866667  |
| RSAD1     | 0.1097       | 0.042266667  | -0.037       | -0.017833333 | 0.123866667  |
| ADHFE1    | -0.0478      | -0.005666667 | -0.041533333 | -0.022566667 | -0.015833333 |

|              |              |              |              |              |              |
|--------------|--------------|--------------|--------------|--------------|--------------|
| SLC35E1      | -0.132666667 | 0.483866667  | -0.129       | -0.0646      | 0.138533333  |
| TNFAIP1      | 0.364166667  | -0.117766667 | -0.0385      | 0.253866667  | -0.053433333 |
| SMG1         | 0.1805       | -0.004933333 | -0.0211      | 0.1497       | -0.0479      |
| LOC730176    | 0.086866667  | 0.136833333  | -0.2224      | 0.060333333  | 0.040933333  |
| LOC100131187 | 0.025766667  | 0.051466667  | 0.071966667  | 0.002733333  | 0.0362       |
| TRIM44       | -0.116133333 | -0.0555      | 0.0174       | -0.073633333 | -0.0865      |
| MBTD1        | 0.043966667  | 0.749933333  | -0.1758      | -0.059       | 0.412166667  |
| CINP         | 0.0367       | 0.1476       | 0.010566667  | 0.118733333  | 0.0753       |
| GSTM4        | -0.010166667 | -0.136633333 | 0.032266667  | -0.000266667 | -0.074466667 |
| UBE2NL       | -0.003133333 | 0.150066667  | -0.258       | -0.1463      | 0.2316       |
| TMEM38B      | 0.243966667  | 0.099966667  | -0.1497      | 0.079966667  | 0.190366667  |
| SYVN1        | -0.124633333 | -0.0459      | -0.021466667 | -0.178566667 | -0.068566667 |
| C19orf63     | -0.082133333 | -0.017833333 | -0.084033333 | -0.104133333 | 0.0282       |
| RHOC         | -0.188466667 | -0.0679      | 0.273633333  | -0.159966667 | -0.017566667 |
| GOLGA8A      | -0.161733333 | -0.0785      | 0.180966667  | -0.087266667 | -0.058433333 |
| ZNF91        | -0.3844      | -0.065533333 | 0.0766       | -0.1208      | -0.2162      |
| CNPY3        | 0.0173       | -0.1956      | 0.103133333  | -0.029966667 | 0.0759       |
| OAT          | 0.0701       | -0.0017      | -0.027       | -0.016333333 | 0.028166667  |
| FEM1A        | 0.107166667  | 0.017466667  | -0.021433333 | -0.019966667 | 0.048133333  |
| CALM2        | 0.103        | 0.074166667  | -0.005966667 | 0.1315       | 0.067966667  |
| RPS4Y1       | 0.082933333  | -0.2158      | 0.117566667  | 0.162333333  | -0.248966667 |
| LOC402251    | -0.1986      | -0.1136      | -0.069633333 | -0.0905      | -0.2677      |
| NKAP         | -0.220433333 | -0.0425      | -0.004733333 | -0.1984      | -0.021833333 |
| CXorf64      | 0.3617       | -0.0135      | -0.000433333 | 0.317166667  | -0.108333333 |
| DBN1         | -0.069133333 | -0.128       | 0.311633333  | -0.140566667 | 0.142866667  |
| LOC730052    | -0.229733333 | -0.132166667 | 0.1627       | -0.161133333 | 0.008166667  |
| ANKRD30B     | -0.1429      | 0.4292       | -0.179933333 | -0.058066667 | 0.074666667  |
| TMPRSS12     | -0.043166667 | -0.051833333 | 0.2776       | 0.0775       | -0.034366667 |
| LOC647340    | 0.043266667  | -0.1031      | 0.022566667  | 0.023866667  | -0.014033333 |
| ADAM17       | -0.4413      | 0.282966667  | -0.104833333 | -0.260366667 | -0.0022      |
| ZNF728       | -0.131166667 | 0.082666667  | 0.080133333  | -0.0343      | 0.0515       |
| CBS          | -0.509566667 | -0.126333333 | -0.164966667 | -0.588233333 | -0.1386      |
| ZNF675       | -0.078333333 | 0.264066667  | -0.102266667 | 0.0771       | 0.1255       |
| LOC644988    | 0.044533333  | 0.030333333  | -0.0641      | 0.024466667  | 0.061633333  |
| G6PC3        | -0.082766667 | -0.1746      | 0.164733333  | 0.014833333  | 0.079        |
| LOC100131196 | -0.027866667 | -0.143466667 | 0.116566667  | 0.060666667  | -0.0253      |
| UBE4A        | -0.093066667 | 0.001166667  | -0.0647      | -0.034533333 | -0.0333      |
| PLOD2        | -0.2306      | -0.381733333 | 0.212166667  | -0.111966667 | -0.1524      |
| C1orf9       | -0.1638      | 0.105866667  | -0.0197      | -0.074466667 | 0.066433333  |
| LOC729417    | -0.0191      | -0.102433333 | -0.098966667 | -0.1125      | -0.0453      |
| AFMID        | 0.208766667  | -0.040766667 | 0.035933333  | 0.0611       | 0.100466667  |
| TMEM214      | 0.0186       | -0.131033333 | 0.1386       | 0.054966667  | 0.0175       |
| RGPD2        | 0.118        | 0.113133333  | -0.049033333 | 0.135333333  | 0.012566667  |
| SIKE         | 0.0296       | -0.102966667 | -0.052166667 | -0.0259      | -0.051933333 |
| DPY30        | 0.116433333  | 0.064766667  | -0.071166667 | 0.135033333  | -0.0257      |
| DSEL         | 0.1032       | 0.059766667  | -0.0676      | -0.009366667 | 0.040133333  |
| ACY1         | -0.2229      | -0.263866667 | 0.2722       | -0.212366667 | -0.035466667 |

|              |              |              |              |              |              |
|--------------|--------------|--------------|--------------|--------------|--------------|
| LOC653119    | 0.309333333  | 0.004033333  | -0.010966667 | 0.150733333  | 0.172166667  |
| MRPL15       | -0.020066667 | 0.013266667  | -0.070133333 | 0.0313       | 0.0156       |
| LOC729603    | -0.053533333 | 0.6009       | -0.1407      | -0.015733333 | 0.1491       |
| RAPGEF2      | -0.0073      | -0.065033333 | -0.0798      | -0.066433333 | 0.0785       |
| DCTN5        | 0.233        | -0.0944      | -0.021833333 | 0.0533       | 0.020466667  |
| LOC100131970 | 0.103866667  | -0.005933333 | 0.136333333  | 0.094333333  | 0.186166667  |
| TMEM57       | 0.125966667  | -0.127433333 | 0.007866667  | 0.1371       | -0.1158      |
| RPS13        | -0.0816      | 0.075133333  | 0.052566667  | 0.085333333  | -0.0781      |
| ODF2L        | -0.024333333 | -0.1568      | -0.121533333 | -0.046566667 | -0.077333333 |
| C14orf102    | -0.1507      | 0.0349       | 0.013333333  | -0.024066667 | -0.061966667 |
| LOC728484    | -0.273933333 | 0.161333333  | -0.222766667 | -0.1428      | -0.073933333 |
| CALML4       | 0.225533333  | 0.096366667  | -0.004       | 0.1382       | 0.049233333  |
| RANGRF       | -0.187233333 | 0.093233333  | -0.188366667 | -0.078433333 | -0.0195      |
| SMAP2        | 0.149333333  | 0.093466667  | -0.0974      | 0.121966667  | -0.0451      |
| LOC645332    | -0.0543      | 0.0289       | 0.040166667  | -0.060933333 | 0.056866667  |
| GLB1         | -0.214       | -0.089433333 | -0.048       | -0.2686      | -0.127533333 |
| ATPBD4       | 0.039466667  | 0.0521       | -0.0709      | 0.000633333  | 0.062366667  |
| LMAN2        | -0.050733333 | 0.044766667  | -0.039833333 | 0.029033333  | 0.012666667  |
| KCNH6        | 0.1233       | 0.3453       | 0.001666667  | 0.0433       | 0.202233333  |
| LOC642784    | 0.188166667  | 0.205333333  | -0.022533333 | 0.239633333  | 0.043533333  |
| LOC100127925 | 0.043333333  | 0.040933333  | -0.1283      | -0.0167      | 0.043066667  |
| LOC728069    | 0.0493       | 0.043933333  | -0.1003      | 0.0594       | -0.119233333 |
| GBF1         | 0.0732       | -0.077933333 | 0.000433333  | 0.018366667  | -0.053466667 |
| SOCS5        | 0.286433333  | 0.090633333  | -0.0321      | 0.230966667  | 0.0555       |
| ABC7         | -0.094466667 | -0.040466667 | -0.068033333 | -0.0834      | 0.054833333  |
| VAMP4        | -0.237133333 | 0.0925       | 0.1217       | -0.017066667 | -0.050466667 |
| ARMCX1       | 0.047133333  | -0.018766667 | -0.0737      | -0.016433333 | -0.011666667 |
| JMJD4        | 0.257966667  | 0.026966667  | 0.002633333  | 0.263266667  | 0.000233333  |
| SHQ1         | 0.217933333  | 0.1833       | -0.1094      | 0.082233333  | 0.071        |
| TSPYL2       | 0.159366667  | -0.159666667 | 0.0237       | 0.0937       | 0.0029       |
| LOC645387    | 0.086033333  | 0.004433333  | -0.1205      | 0.039633333  | -0.0597      |
| SRP72        | 0.036433333  | 0.009333333  | 0.083866667  | -0.008933333 | 0.0448       |
| VAPB         | -0.016166667 | -0.032433333 | -0.027766667 | -0.0184      | -0.129       |
| LOC643336    | 0.061266667  | 0.093633333  | 0.0974       | 0.078366667  | 0.075733333  |
| RPAP3        | 0.1902       | -0.0347      | -0.0612      | 0.101933333  | 0.018866667  |
| LARP1        | 0.178833333  | -0.098566667 | -0.088266667 | 0.1059       | -0.188033333 |
| HINT3        | -0.0208      | -0.120133333 | -0.6497      | -0.0671      | -0.290233333 |
| TAF6L        | 0.006133333  | 0.010433333  | -0.0872      | -0.057366667 | -0.089633333 |
| DCP1A        | 0.138733333  | 0.083433333  | 0.114233333  | 0.2747       | -0.0924      |
| ELMO1        | -0.017033333 | 0.098666667  | -0.014433333 | -0.148766667 | 0.045966667  |
| SNHG5        | -0.046233333 | -0.280633333 | -0.0557      | -0.1249      | -0.1157      |
| RBM45        | -0.0666      | -0.0231      | -0.100633333 | 0.044833333  | -0.033466667 |
| OSBPL7       | -0.175066667 | -0.134133333 | -0.1291      | -0.125433333 | -0.109633333 |
| LOC653162    | -0.040233333 | -0.0151      | -0.0831      | -0.0405      | -0.0299      |
| PPP4R2       | 0.080366667  | 0.191733333  | -0.0286      | 0.173433333  | 0.1074       |
| WDR54        | -0.157966667 | -0.0429      | 0.311766667  | -0.061133333 | -0.035433333 |
| MYST1        | -0.0634      | -0.002666667 | 0.069666667  | -0.021233333 | -0.0341      |

|              |              |              |              |              |              |
|--------------|--------------|--------------|--------------|--------------|--------------|
| WDR22        | -0.086       | -0.133433333 | 0.100666667  | -0.178933333 | -0.0229      |
| LOC148413    | -0.297133333 | -0.419966667 | -0.1843      | -0.316166667 | -0.1972      |
| SCAMP1       | -0.228833333 | 0.003566667  | 0.120233333  | -0.156733333 | -0.089833333 |
| CSHL1        | -0.041066667 | -0.023666667 | -0.0123      | -0.1283      | 0.083733333  |
| LOC646688    | -0.1332      | -0.022466667 | -0.129333333 | -0.071166667 | -0.042533333 |
| RNASEN       | -0.185833333 | 0.0157       | 0.005766667  | -0.1324      | 0.0961       |
| C5orf30      | 0.137466667  | -0.069833333 | -0.012133333 | 0.033633333  | 0.1051       |
| HNRNPF       | 0.1311       | 0.098866667  | -0.0709      | 0.0944       | -0.042333333 |
| LOC100134083 | -0.102966667 | -0.1077      | -0.020266667 | -0.150233333 | -0.092066667 |
| STX6         | 0.005333333  | -0.134066667 | 0.1179       | -0.0149      | -0.011366667 |
| CCDC56       | -0.030566667 | -0.028033333 | 0.013133333  | 0.0262       | 0.005666667  |
| ZNF189       | -0.087666667 | -0.151533333 | -0.128566667 | -0.0564      | -0.201666667 |
| SNAP23       | -0.2818      | 0.057466667  | -0.189033333 | -0.187966667 | 0.018033333  |
| RPS19        | 0.129        | -0.378966667 | 0.0612       | -0.1028      | -0.104233333 |
| SNX11        | 0.0621       | 0.020233333  | -0.038733333 | 0.099266667  | 0.032        |
| SENP3        | -0.050466667 | 0.154466667  | 0.1315       | 0.185433333  | -0.023233333 |
| LOC100129697 | 0.026033333  | 0.036766667  | 0.077166667  | 0.178        | -0.0485      |
| GOLPH3L      | -0.2981      | -0.058633333 | 0.094566667  | -0.180933333 | 0.029933333  |
| LOC286444    | -0.022733333 | -0.112133333 | 0.049933333  | -0.079933333 | -0.037466667 |
| ARID2        | -0.006466667 | 0.0239       | 0.1869       | 0.087533333  | 0.049733333  |
| SPSB1        | 0.181666667  | 0.026533333  | -0.059933333 | 0.2232       | 6.67E-05     |
| LEO1         | 0.0699       | 0.123133333  | 0.030733333  | 0.0833       | 0.0534       |
| LOC729510    | -0.234733333 | 0.014933333  | -0.2087      | -0.230333333 | 0.0795       |
| TBP          | 0.1608       | 0.1457       | -0.187966667 | 0.1496       | -0.006133333 |
| JAM3         | -0.063666667 | -0.1071      | 0.085266667  | -0.134966667 | -0.019933333 |
| CCNL2        | -0.181566667 | -0.1801      | 0.173466667  | -0.129233333 | -0.0652      |
| RGL2         | -0.171266667 | -0.130633333 | 0.214933333  | -0.064       | -0.022033333 |
| TEX264       | -0.111766667 | 0.002433333  | -0.008433333 | -0.160833333 | 0.063566667  |
| LOC645722    | 0.1322       | -0.0661      | -0.049933333 | 0.164766667  | -0.031       |
| SRF          | 0.5753       | -0.097633333 | 0.004566667  | 0.305533333  | 0.119066667  |
| LOC100128016 | 0.2183       | 0.019066667  | 0.049        | 0.144333333  | 0.000766667  |
| IMMP2L       | -0.043733333 | -0.063233333 | -0.001566667 | -0.015833333 | 0.024366667  |
| POLR2D       | 0.361433333  | -0.050166667 | -0.122033333 | 0.205266667  | -0.068233333 |
| DHX15        | 0.2427       | 0.170633333  | -0.116133333 | 0.252866667  | 0.0479       |
| BIRC5        | 0.168166667  | 0.069533333  | -0.042       | 0.181633333  | -0.010733333 |
| GMDS         | -0.225633333 | -0.037033333 | 0.1482       | -0.189433333 | 0.033266667  |
| RGPD8        | 0.1217       | 0.201333333  | 0.0468       | 0.320633333  | 0.052133333  |
| CASP6        | -0.2365      | 0.0855       | 0.061433333  | -0.043633333 | -0.0564      |
| MAPKAPK5     | 0.171566667  | -0.041       | -0.0495      | 0.0168       | 0.058633333  |
| PIK3C2B      | -0.235633333 | -0.0099      | 0.023033333  | -0.214133333 | 0.035        |
| XKR6         | 0.038733333  | -0.062566667 | -0.118433333 | -0.065533333 | -0.0583      |
| CHMP1A       | 0.1703       | 0.0611       | -0.166533333 | 0.0532       | -0.047933333 |
| TMEM14D      | -0.072266667 | 0.0155       | -0.087033333 | -0.0318      | -0.0499      |
| C14orf174    | -0.104266667 | -0.032366667 | -0.020866667 | -0.015366667 | -0.063333333 |
| WDR34        | 0.133        | 0.015233333  | 0.0609       | 0.1149       | 0.006466667  |
| SCRN3        | -0.2321      | -0.091833333 | 0.009        | -0.287933333 | -0.016066667 |
| MTSS1        | 0.154466667  | 0.101266667  | 0.104766667  | 0.109633333  | 0.107533333  |

|              |              |              |              |              |              |
|--------------|--------------|--------------|--------------|--------------|--------------|
| HSP90B1      | -0.076233333 | -0.075066667 | 0.185133333  | -0.082566667 | 0.068933333  |
| ANKRD28      | -0.1084      | 0.0319       | 0.024666667  | -0.078433333 | 0.043333333  |
| LAMP1        | -0.065266667 | -0.126366667 | -0.053666667 | -0.083333333 | -0.1064      |
| GPAM         | 0.0501       | -0.088266667 | -0.124266667 | -0.0073      | 0.002366667  |
| FBXL12       | -0.034       | -0.047966667 | 0.013033333  | 0.018466667  | -0.0739      |
| NPEPL1       | -0.2038      | -0.198866667 | 0.054866667  | -0.3882      | -0.1353      |
| PHF16        | 0.363166667  | 0.006733333  | -0.242333333 | 0.155433333  | 0.0395       |
| BLMH         | 0.161533333  | -0.011033333 | -0.179033333 | 0.0289       | -0.065933333 |
| JAK1         | -0.036966667 | 0.0204       | 0.060433333  | 0.104166667  | -0.044166667 |
| LOC653524    | -0.136333333 | -0.089466667 | 0.182066667  | -0.1226      | -0.1174      |
| NONO         | 0.136666667  | 0.1489       | -0.1732      | 0.112466667  | -0.071166667 |
| DDX1         | 0.103433333  | 0.0008       | -0.0096      | 0.0665       | -0.0158      |
| LOC643287    | 0.2651       | 0.221033333  | -0.201       | 0.249933333  | 0.1007       |
| DVL2         | -0.138       | -0.0956      | 0.105533333  | -0.059333333 | -0.114933333 |
| N-PAC        | 0.0459       | 0.192266667  | 0.072466667  | 0.1141       | 0.041233333  |
| GCA          | -0.131533333 | -0.002166667 | -0.035866667 | -0.055433333 | 0.0211       |
| SFRS4        | 0.147566667  | 0.117666667  | -0.080266667 | 0.0709       | 0.061033333  |
| SERINC1      | -0.1386      | -0.098166667 | 0.128433333  | -0.024766667 | -0.0795      |
| NAG18        | -0.0217      | 0.102866667  | 0.083466667  | -0.002733333 | 0.0814       |
| ZNF184       | -0.007366667 | -0.133466667 | 0.126933333  | -0.0527      | 0.0548       |
| PPP1R14A     | 0.005966667  | -0.079166667 | -0.062       | -0.0501      | -0.0044      |
| NDUFB10      | -0.236533333 | 0.017733333  | 0.0253       | -0.1301      | -0.029866667 |
| SEC63        | 0.095433333  | -0.041833333 | -0.010033333 | 0.057633333  | -0.120366667 |
| PCDHB6       | 0.0175       | -0.067466667 | 0.029        | -0.069866667 | 0.0163       |
| CENPV        | -0.012633333 | 0.0368       | 0.037166667  | -0.004366667 | 0.0428       |
| LOC730313    | -0.080666667 | 0.5338       | -0.048166667 | -0.179633333 | 0.2385       |
| LOC648059    | 0.0161       | 0.5055       | -0.230433333 | 0.0193       | 0.2412       |
| LOC732360    | 0.131533333  | 0.091366667  | 0.1111       | 0.213433333  | 0.121866667  |
| RPL19        | 0.0571       | -0.024166667 | 0.064233333  | 0.085933333  | -0.051066667 |
| SLC25A6      | -0.0569      | -0.110766667 | 0.077666667  | 0.016233333  | -0.0922      |
| ZSCAN29      | 0.057466667  | -0.100466667 | 0.0248       | 0.047033333  | 0.0096       |
| C17orf70     | -0.046766667 | -0.138833333 | -0.028166667 | -0.181       | 0.010666667  |
| LOC100133080 | -0.065533333 | -0.144433333 | 0.028866667  | -0.0302      | -0.058866667 |
| C9orf37      | -0.0822      | 0.0211       | -0.126033333 | -0.106433333 | -0.005833333 |
| PTPN23       | -0.011466667 | 0.002133333  | 0.026333333  | 0.0339       | -0.001933333 |
| IFI27L1      | -0.290466667 | -0.1666      | 0.078633333  | -0.276133333 | -0.070466667 |
| ACTR2        | -0.153266667 | -0.131333333 | 0.1513       | -0.088466667 | -0.138066667 |
| LOC728533    | -0.032433333 | -0.079233333 | 0.086066667  | -0.013266667 | -0.0758      |
| ARL6IP4      | -0.070533333 | 0.002233333  | 0.2136       | 0.0416       | 0.0599       |
| CLPX         | 0.0526       | 0.0351       | -0.046333333 | 0.092566667  | -0.076866667 |
| BTBD15       | 0.0657       | 0.005433333  | -0.033933333 | -0.068       | 0.084066667  |
| IFNGR1       | -0.079166667 | 0.018366667  | -0.102133333 | 0.000566667  | -0.053666667 |
| METTL2B      | -0.0584      | 0.100733333  | 0.0889       | -0.0431      | 0.1067       |
| LOC730316    | 0.113566667  | 0.0693       | 0.136033333  | 0.020366667  | 0.160733333  |
| SMC5         | 0.162466667  | 0.064066667  | -0.095566667 | 0.102433333  | 0.0949       |
| NMNAT1       | -0.084966667 | -0.11        | 0.1606       | -0.049033333 | 0.024566667  |
| PLEC1        | 0.030933333  | 0.046966667  | -0.1416      | 0.0691       | -0.144733333 |

|              |              |              |              |              |              |
|--------------|--------------|--------------|--------------|--------------|--------------|
| NR2C1        | 0.079433333  | 0.039033333  | 0.045166667  | 0.009666667  | 0.0843       |
| ZNF785       | 0.012833333  | 0.113466667  | -0.0303      | -0.0269      | 0.123266667  |
| UBR2         | -0.2051      | 0.083066667  | 0.134833333  | -0.050633333 | 0.080833333  |
| LOC389517    | -0.0535      | 0.476566667  | -0.123366667 | -0.116766667 | 0.139966667  |
| PIGA         | 0.2125       | -0.137133333 | 0.1089       | 0.124933333  | 0.1334       |
| MRPS15       | 0.045333333  | 0.0324       | -0.002033333 | 0.0641       | -0.014533333 |
| TIMM22       | -0.003766667 | -0.049166667 | -0.141733333 | -0.033133333 | -0.171       |
| OR7E156P     | -0.326666667 | -0.241833333 | 0.0533       | -0.3953      | -0.179533333 |
| EDG7         | 0.047633333  | -0.062266667 | 0.020466667  | 0.0063       | 0.044        |
| LOC401206    | 0.0159       | -0.1076      | 0.0849       | -0.0211      | 0.0531       |
| UBE2CBP      | -0.022766667 | -0.0062      | 0.070266667  | -0.077166667 | 0.050833333  |
| CBX7         | 0.003866667  | -0.032566667 | -0.024666667 | -0.073333333 | 0.004766667  |
| DTX3         | -0.244333333 | -0.1505      | 0.028        | -0.2521      | -0.133233333 |
| SLC25A17     | 0.0893       | -0.063233333 | -0.058733333 | 0.052333333  | -0.152566667 |
| LOC442181    | -0.0858      | 0.1502       | -0.109266667 | -0.0847      | 0.061533333  |
| FBXO33       | 0.037066667  | 0.073933333  | -0.038966667 | -0.012166667 | 0.143266667  |
| CCDC28A      | -0.311266667 | -0.087266667 | -0.0343      | -0.2638      | -0.105133333 |
| GPR108       | -0.098966667 | -0.129333333 | -0.074766667 | -0.170366667 | -0.1121      |
| LOC100008588 | 0.4215       | 0.3145       | 0.232833333  | 0.8856       | 0.111366667  |
| PPM1G        | 0.140733333  | 0.100233333  | -0.0422      | 0.075033333  | 0.009366667  |
| UGT2B11      | -0.003766667 | -0.071866667 | -0.0157      | -0.157733333 | -0.0732      |
| BET1         | -0.2544      | -0.030266667 | 0.028        | -0.094133333 | 0.0099       |
| DACT1        | 0.039633333  | 0.031866667  | -0.171733333 | -0.077166667 | -0.000466667 |
| PIM2         | 0.0549       | -0.085133333 | 0.091566667  | 0.038433333  | 0.021833333  |
| APPBP2       | -0.357133333 | -0.240533333 | 0.197133333  | -0.3084      | -0.0216      |
| CCDC5        | 0.3521       | 0.183166667  | -0.0577      | 0.251333333  | 0.159866667  |
| ITM2B        | -0.289633333 | -0.045933333 | 0.238333333  | -0.136433333 | -0.051866667 |
| LOC100129424 | -0.1942      | -0.0029      | 0.066733333  | -0.008533333 | -0.2         |
| HDAC3        | 0.0687       | 0.016133333  | 0.002466667  | 0.008033333  | -0.0614      |
| KIAA0146     | -0.004566667 | -0.0683      | -0.045533333 | -0.053133333 | -0.048433333 |
| MOBK12A      | -0.0669      | 0.101633333  | 0.006033333  | 0.013266667  | 0.0678       |
| THOC6        | -0.006733333 | -0.009733333 | 0.018533333  | -0.0323      | 0.048333333  |
| ZNF823       | 0.073933333  | -0.158533333 | 0.027266667  | 0.0564       | -0.202133333 |
| LOC100129269 | -0.247233333 | 0.7015       | 0.0168       | 0.033666667  | 0.159166667  |
| TRO          | -0.047466667 | -0.020566667 | -0.0594      | -0.094933333 | -0.069633333 |
| ZNF24        | 0.092166667  | 0.1373       | -0.164166667 | 0.088566667  | 0.047366667  |
| TRIM45       | -0.0524      | -0.078833333 | -0.086766667 | -0.158166667 | 0.0296       |
| PLS3         | 0.0176       | -0.192833333 | 0.064866667  | -0.0137      | 0.110466667  |
| SEPHS2       | -0.2102      | -0.159866667 | -0.045366667 | -0.1049      | -0.259933333 |
| VPRBP        | 0.0871       | 0.0828       | -0.037666667 | 0.132233333  | -0.0303      |
| UQCRH        | -0.4501      | -0.0715      | -0.109433333 | -0.329766667 | -0.073266667 |
| ASF1A        | -0.291733333 | 0.0056       | -0.0402      | -0.173733333 | 0.050733333  |
| C21orf70     | 0.1465       | 0.085766667  | 0.030933333  | 0.1          | -0.003366667 |
| ZNF268       | -0.019066667 | -0.069866667 | 0.084933333  | -0.056533333 | 0.066166667  |
| RPS15A       | -0.131266667 | -0.064433333 | 0.181533333  | -0.017166667 | 0.011433333  |
| GNG12        | 0.4365       | 0.176366667  | 0.0858       | 0.435966667  | 0.182233333  |
| DECR2        | -0.239033333 | -0.199233333 | 0.172033333  | -0.111833333 | -0.1656      |

|              |              |              |              |              |              |
|--------------|--------------|--------------|--------------|--------------|--------------|
| NAT6         | 0.011766667  | -0.123033333 | -0.083966667 | -0.0145      | -0.164233333 |
| LOC392285    | -0.015533333 | 0.107566667  | -0.144366667 | 0.002233333  | -0.0959      |
| IMPA1        | 0.272666667  | -0.085666667 | 0.1369       | 0.1265       | 0.2379       |
| OS9          | -0.117133333 | -0.125666667 | -0.043933333 | -0.035166667 | -0.028566667 |
| SLC25A13     | 0.043766667  | 0.0548       | 0.0313       | -0.0095      | 0.102966667  |
| PGRMC2       | 0.0299       | -0.005733333 | -0.1861      | 0.099233333  | -0.152733333 |
| LOC644935    | -0.120933333 | 0.061666667  | 0.0637       | 0.022033333  | -0.067766667 |
| POLR3H       | 0.2044       | 0.079866667  | -0.091266667 | 0.067433333  | 0.052733333  |
| DERL1        | 0.098033333  | -0.0619      | -0.206766667 | 0.035066667  | -0.120666667 |
| LOC729742    | -0.2652      | -0.143466667 | 0.099966667  | -0.048033333 | -0.0837      |
| LOC100133888 | 0.145666667  | -0.118466667 | 0.254433333  | 0.238        | -0.0811      |
| PSMG2        | 0.036533333  | 0.031866667  | -0.033833333 | 0.014866667  | -0.044166667 |
| TRIB1        | -0.1473      | -0.0717      | 0.434266667  | -0.003366667 | -0.124266667 |
| TBC1D22A     | -0.097433333 | 0.0346       | 0.053433333  | -0.029633333 | 0.0315       |
| TMEM106C     | -0.012       | 0.149933333  | 0.0722       | 0.087133333  | -0.016366667 |
| C10orf119    | 0.216066667  | -0.082566667 | 0.0785       | 0.065133333  | 0.116533333  |
| VPS13A       | -0.0455      | -0.160866667 | 0.105433333  | 0.043266667  | -0.117833333 |
| PIGL         | 0.050433333  | 0.1654       | -0.0281      | 0.240666667  | -0.0304      |
| CHCHD5       | -0.015933333 | -0.0288      | -0.0497      | -0.0108      | -0.0913      |
| GEN1         | 0.057966667  | 0.0496       | -0.049666667 | 0.080533333  | -0.003033333 |
| API5         | 0.103666667  | 0.109833333  | -0.1172      | 0.089266667  | -0.005466667 |
| KIAA0889     | 0.036766667  | 0.001766667  | -0.021533333 | 0.0318       | -0.102       |
| SKP1A        | -0.058833333 | -0.002666667 | -0.194233333 | 0.091833333  | -0.1434      |
| STS-1        | 0.180033333  | 0.1119       | 0.136066667  | 0.059733333  | 0.096466667  |
| PTTG1        | 0.234666667  | 0.118766667  | -0.066733333 | 0.175166667  | 0.062733333  |
| LOC727732    | 0.094133333  | -0.171066667 | 0.086333333  | -0.051566667 | 0.018666667  |
| FAM122A      | 0.0079       | -0.089733333 | -0.168133333 | -0.1366      | -0.096933333 |
| OSBPL8       | -0.075466667 | -0.099866667 | 0.0587       | -0.0175      | 0.118433333  |
| CAPN7        | -0.034833333 | 0.201933333  | -0.1271      | 0.1318       | -0.0111      |
| LOC100129933 | 0.229766667  | 0.0696       | 0.096966667  | 0.252766667  | 0.083866667  |
| MTMR12       | 0.209566667  | -0.148433333 | -0.020333333 | 0.124433333  | -0.0054      |
| 2-Mar        | 0.1321       | 0.114633333  | 0.071366667  | 0.079966667  | 0.1753       |
| SFRS12       | -0.158333333 | 0.388633333  | -0.090166667 | 0.009933333  | 0.180133333  |
| FKBP4        | 0.239266667  | 0.097733333  | -0.002333333 | 0.146166667  | 0.179933333  |
| FAM149B1     | -0.197766667 | 0.0107       | 0.101666667  | -0.051433333 | 0.053966667  |
| LOC100129608 | 0.1838       | 0.0077       | -0.024033333 | 0.075066667  | -0.025233333 |
| C22orf9      | -0.132866667 | 0.141066667  | -0.078533333 | -0.077433333 | 0.0515       |
| LOC649722    | -0.115366667 | -0.103133333 | -0.043533333 | -0.149166667 | -0.017366667 |
| NIF3L1       | 0.073966667  | 0.138933333  | -0.062966667 | 0.007933333  | 0.064133333  |
| LOC100130131 | 0.2628       | -0.001       | 0.068733333  | 0.130566667  | 0.083633333  |
| LACTB        | 0.125033333  | 0.018533333  | -0.208266667 | 0.198133333  | -0.102133333 |
| EIF2B1       | 0.120433333  | -0.086533333 | -0.0398      | -0.0439      | -0.052433333 |
| LOC653199    | 0.030033333  | -0.013966667 | -0.010033333 | 0.035        | -0.024433333 |
| PATE3        | 0.180366667  | 0.077066667  | 0.073033333  | 0.2035       | -0.125266667 |
| PMPCA        | -0.020166667 | 0.165533333  | -0.0175      | -0.070666667 | 0.115033333  |
| COQ10A       | 0.213066667  | -0.030866667 | -0.234933333 | 0.026266667  | 0.071833333  |
| AURKAIP1     | -0.0056      | 0.029633333  | 0.0386       | -0.0368      | 0.122233333  |

|              |              |              |              |              |              |
|--------------|--------------|--------------|--------------|--------------|--------------|
| FGFR10P      | 0.222233333  | 0.1287       | -0.0924      | 0.076233333  | 0.068033333  |
| CAPN2        | 0.0689       | 0.090433333  | 0.090433333  | -0.0591      | 0.1881       |
| LOC648366    | 0.050333333  | 0.000133333  | 0.017766667  | -0.078       | -0.029033333 |
| LOC400836    | -0.038633333 | 0.0228       | 0.057433333  | 0.087666667  | -0.052133333 |
| MOGS         | 0.166633333  | -0.162766667 | 0.074333333  | -0.0188      | 0.054033333  |
| CHRNA5       | -0.105366667 | 0.676833333  | 0.037166667  | -0.103866667 | 0.3379       |
| C17orf41     | 0.290166667  | -0.013233333 | -0.030266667 | 0.1232       | -0.0185      |
| POGZ         | -0.052433333 | -0.031866667 | -0.006233333 | -0.008966667 | -0.176766667 |
| MED13L       | -0.172866667 | -0.025666667 | 0.159333333  | 0.012966667  | 0.065966667  |
| MRPL44       | -0.1051      | 0.136766667  | -0.088       | -0.1068      | 0.057033333  |
| ZC3H5        | -0.191433333 | 0.071933333  | 0.0852       | -0.072666667 | 0.013933333  |
| RAB11FIP1    | 0.113266667  | -0.166733333 | -0.089666667 | 0.085333333  | -0.1684      |
| LOC653375    | 0.211633333  | -0.058333333 | -0.092166667 | 0.045566667  | -0.058033333 |
| CDC123       | 0.3197       | 0.060566667  | 0.028033333  | 0.2445       | 0.0147       |
| LOC645430    | -0.106533333 | -0.040866667 | -0.067566667 | -0.059266667 | -0.045633333 |
| ORAI1        | 0.001833333  | -0.026233333 | 0.2822       | -0.0205      | 0.0326       |
| ZNF2         | 0.1011       | -0.0335      | -0.0613      | 0.054966667  | -0.0031      |
| TOMM20       | 0.2079       | -0.2379      | -0.172766667 | 0.214333333  | -0.289233333 |
| ADAM10       | 0.124266667  | 0.116466667  | -0.204133333 | 0.040266667  | -0.036966667 |
| IGFBP7       | -0.237033333 | -0.1383      | 0.272266667  | -0.072133333 | -0.0228      |
| KNTC1        | 0.173366667  | 0.1189       | 0.021066667  | 0.158966667  | -0.000266667 |
| SPAG9        | -0.0036      | -0.184533333 | -0.033133333 | -0.0245      | -0.034066667 |
| RARS2        | -0.0435      | -0.032266667 | 0.049966667  | 0.0297       | -0.074233333 |
| LOC100132973 | -0.0498      | 0.090366667  | -0.017133333 | -0.110133333 | 0.164366667  |
| ZC3H12C      | 0.196833333  | -0.015833333 | 0.0378       | 0.108266667  | 0.117033333  |
| CIAO1        | -0.183533333 | -0.0652      | -0.085566667 | -0.272366667 | -0.087266667 |
| LOC654194    | -0.0329      | -0.015333333 | 0.025833333  | -0.047266667 | 0.033833333  |
| SEMA4D       | 0.0577       | 0.103166667  | 0.0699       | -0.0322      | 0.083833333  |
| KHSRP        | 0.313233333  | -0.005433333 | -0.030066667 | 0.1341       | 0.087066667  |
| SNORA7B      | 0.094466667  | -0.022566667 | -0.0645      | -6.67E-05    | 0.037266667  |
| COQ6         | -0.089333333 | -0.106133333 | -0.0047      | -0.1551      | -0.032033333 |
| LGTN         | -0.2096      | -0.081366667 | 0.067066667  | -0.054966667 | -0.1312      |
| ZNRF3        | 0.277066667  | -0.0318      | 0.116633333  | 0.162866667  | 0.071833333  |
| GDE1         | -0.233666667 | -0.109766667 | 0.1473       | -0.0821      | -0.1104      |
| SSH3         | -0.268833333 | -0.121933333 | 0.155733333  | -0.260966667 | -0.093933333 |
| SMARCA4      | 0.133933333  | 0.019433333  | 0.116633333  | 0.062566667  | 0.0509       |
| BEND7        | -0.095666667 | -0.081266667 | -0.0358      | -0.013833333 | -0.0788      |
| C11orf49     | -0.081       | 0.008166667  | -0.041       | -0.173566667 | 0.022033333  |
| CHKB         | -0.065733333 | -0.145       | -0.012933333 | -0.111833333 | -0.049666667 |
| LOC723805    | 0.115166667  | 0.077266667  | -0.012133333 | 0.084933333  | 0.0519       |
| MCART1       | -0.226966667 | 0.674666667  | -0.155933333 | -0.149633333 | 0.215833333  |
| FIGNL1       | 0.368566667  | 0.071333333  | -0.160733333 | 0.1852       | 0.036133333  |
| EN2          | 0.0849       | -0.028266667 | 0.030133333  | 0.083566667  | 0.0217       |
| TNIK         | -0.063633333 | -0.087466667 | 0.054466667  | -0.095966667 | 0.0093       |
| IQCC         | 0.024133333  | 0.049566667  | -0.092633333 | 0.0025       | -0.1052      |
| AKTIP        | -0.1777      | -0.0091      | -0.162266667 | -0.118333333 | 0.002566667  |
| ZNF205       | -0.116066667 | -0.0507      | 0.093666667  | -0.1826      | 0.090933333  |



|              |              |              |              |              |              |
|--------------|--------------|--------------|--------------|--------------|--------------|
| LOC730358    | 0.0159       | -0.0137      | 0.0266       | -0.185266667 | 0.036566667  |
| PGM3         | -0.059133333 | 0.048366667  | -0.002033333 | 0.0469       | -0.002833333 |
| ADA          | -0.205233333 | -0.1416      | 0.1892       | -0.1463      | -0.074633333 |
| LOC641746    | -0.1826      | 0.2363       | -0.347266667 | -0.068733333 | 0.1458       |
| ACTRT1       | 0.049433333  | -0.118166667 | 0.027833333  | 0.0669       | -0.171266667 |
| BRWD1        | -0.203666667 | -0.0965      | 0.096766667  | -0.1559      | 0.064966667  |
| TACC3        | 0.069366667  | 0.149233333  | 0.044766667  | 0.169666667  | -0.0892      |
| AUH          | -0.1169      | 0.003233333  | 0.001966667  | -0.129366667 | -0.022233333 |
| LOC652904    | 0.064466667  | 0.151666667  | -0.1576      | 0.015466667  | 0.0297       |
| ZHX1         | 0.009366667  | 0.082166667  | 0.031433333  | 0.110533333  | 0.027166667  |
| BTBD6        | 0.1768       | 0.083366667  | -0.081133333 | 0.0892       | 0.058433333  |
| PHKA1        | 0.050933333  | -0.0501      | 0.001466667  | -0.06        | 0.045033333  |
| EXOSC4       | 0.2393       | 0.060133333  | -0.010033333 | 0.095333333  | 0.074833333  |
| C6orf167     | 0.1623       | 0.005066667  | -0.038766667 | 0.0296       | -0.0353      |
| LOC285176    | -0.0274      | 0.235633333  | -0.1366      | -0.010166667 | 0.198633333  |
| VPS39        | -0.1744      | -0.000666667 | -0.089533333 | -0.153266667 | -0.0571      |
| RDM1         | -0.104933333 | 0.051733333  | 0.230166667  | 0.0365       | 0.183866667  |
| FAF2         | 0.081766667  | -0.055933333 | 0.0039       | 0.035433333  | -0.055866667 |
| ALKBH8       | 0.0265       | 0.025033333  | 0.194166667  | -8.00E-04    | 0.064266667  |
| MAPRE3       | -0.103733333 | -0.128       | 0.080266667  | -0.131833333 | -0.125166667 |
| MKKS         | -0.031       | 0.1648       | -0.034766667 | -0.0596      | 0.132666667  |
| FRRS1        | 0.176433333  | -0.1535      | 0.1163       | 0.0349       | -0.012466667 |
| LOC100133609 | 0.0702       | -0.006466667 | -0.0509      | 0.009433333  | 0.0302       |
| C1orf128     | 0.2249       | 0.072066667  | -0.381       | 0.070833333  | -0.067966667 |
| SNORD17      | 0.367666667  | 0.061533333  | -0.118733333 | 0.132066667  | 0.1282       |
| MTUS1        | -0.052033333 | -0.195166667 | -0.078333333 | -0.153233333 | -0.1825      |
| IRF9         | -0.3566      | -0.223233333 | 0.397233333  | -0.053433333 | -0.115066667 |
| ELOF1        | 0.424033333  | 0.180366667  | -0.068466667 | 0.1975       | 0.153533333  |
| LOC649150    | -0.5797      | 0.248033333  | -0.5183      | -0.491233333 | 0.1289       |
| SENP6        | 0.030733333  | -0.007533333 | -0.071666667 | 0.009866667  | -0.105566667 |
| LOC440927    | -0.039266667 | -0.191866667 | 0.094266667  | 0.012566667  | -0.0722      |
| RHOD         | 0.071733333  | -0.009266667 | -0.043766667 | 0.038333333  | -0.0745      |
| MGC72104     | -0.199666667 | -0.102333333 | 0.031533333  | -0.175266667 | -0.053666667 |
| IFI16        | -0.335933333 | -0.1852      | 0.071733333  | -0.3754      | 0.024566667  |
| LOC654135    | 0.057566667  | -0.0954      | -0.038433333 | 0.062733333  | -0.177133333 |
| ZZEF1        | -0.059833333 | -0.069433333 | -0.046633333 | -0.096866667 | -0.079133333 |
| NUDT9        | 0.142933333  | -0.074833333 | 0.128733333  | 0.1071       | -0.013966667 |
| HLX          | 0.202433333  | -0.111933333 | 0.067233333  | 0.2319       | 0.0533       |
| TMEM49       | -0.0528      | -0.098666667 | -0.023233333 | -0.070966667 | -0.0525      |
| FKBP2        | -0.154833333 | 0.0143       | 0.008033333  | -0.234266667 | 0.1256       |
| ALDH6A1      | -0.3754      | -0.1403      | 0.193733333  | -0.280066667 | -0.153       |
| DNAJC5       | 0.2169       | -0.097833333 | 0.043833333  | 0.073933333  | -0.008633333 |
| MORC4        | 0.005333333  | -0.052       | 0.051033333  | -0.0506      | -0.0406      |
| ACER2        | 0.046033333  | -0.0009      | -0.002833333 | 0.060966667  | -0.1199      |
| LOC100132742 | 0.018766667  | -0.0485      | 0.0929       | 0.006466667  | 0.0081       |
| DNAJC27      | -0.107666667 | -0.121333333 | 0.055333333  | -0.0609      | -0.194866667 |
| CWF19L2      | 0.151833333  | 0.061833333  | -0.065866667 | 0.0954       | 0.047033333  |

|              |       |              |              |              |              |              |
|--------------|-------|--------------|--------------|--------------|--------------|--------------|
| WASF2        |       | 0.1289       | -0.012366667 | 0.073666667  | 0.081033333  | 0.095566667  |
| ZNF133       |       | 0.0249       | -0.210066667 | 0.024366667  | -0.072433333 | -0.059333333 |
| VPS52        |       | -0.014533333 | -0.107966667 | -0.083633333 | -0.104333333 | -0.1184      |
| HSPC159      |       | 0.099933333  | 0.0325       | -0.102833333 | 0.039        | -0.0593      |
| LOC541471    |       | -0.017333333 | 0.123833333  | -0.093733333 | -0.044033333 | 0.093666667  |
| FAM48A       |       | 0.032166667  | 0.015266667  | 0.005133333  | -0.036066667 | 0.036566667  |
| WDR18        |       | 0.058333333  | -0.019266667 | -0.000233333 | 0.013866667  | 0.003133333  |
| TUSC4        |       | 0.0722       | -0.143366667 | -0.004066667 | -0.0675      | -0.002       |
| CKS2         |       | 0.244166667  | 0.145366667  | 0.052766667  | 0.187666667  | 0.167933333  |
| LOC100132513 |       | 0.0208       | -0.0399      | 0.171066667  | 0.095733333  | -0.1049      |
| LOC653881    |       | -0.1128      | -0.038666667 | -0.021766667 | -0.1649      | -0.025266667 |
| B3GALNT1     |       | 0.052433333  | -0.039833333 | 0.0697       | -0.031033333 | -0.003033333 |
|              | 4-Mar | 0.081466667  | 0.044066667  | -0.058966667 | 0.0899       | -0.029666667 |
| AEN          |       | 0.3601       | 0.017066667  | 0.1332       | 0.2528       | 0.043266667  |
| TBC1D8B      |       | -0.008366667 | 0.017933333  | -0.023766667 | 0.0043       | -0.0537      |
| SNORD83B     |       | 0.295866667  | 0.046733333  | -0.033266667 | 0.275666667  | 0.052333333  |
| LOC651202    |       | -0.126166667 | -0.2076      | -0.008366667 | -0.164766667 | -0.096866667 |
| PCBD2        |       | -0.1368      | -0.0078      | -0.206566667 | -0.189833333 | 0.003066667  |
| CNTNAP1      |       | -0.081533333 | -0.1423      | 0.282133333  | -0.171666667 | 0.047233333  |
| KIAA2010     |       | 0.315766667  | 0.136666667  | -0.133866667 | 0.299033333  | 0.028833333  |
| MSL3L1       |       | 0.110533333  | -0.1311      | 0.195        | 0.0976       | 0.0622       |
| DENND4C      |       | -0.150966667 | -0.1249      | -0.074766667 | -0.195466667 | 0.022        |
| PPP1R8       |       | 0.246333333  | 0.267033333  | -0.0977      | 0.316733333  | 0.076433333  |
| VAMP3        |       | -0.0223      | -0.148966667 | 0.1333       | -0.022033333 | -0.101866667 |
| LOC729964    |       | 0.319033333  | -0.127066667 | -0.0056      | 0.129933333  | 0.031366667  |
| ARHGAP30     |       | 0.1476       | 0.043666667  | -0.020466667 | 0.0743       | -0.0573      |
| RNFT2        |       | -0.061333333 | 0.075133333  | -0.074466667 | -0.0715      | 0.006533333  |
| ELF4         |       | 0.1837       | -0.079466667 | -0.0061      | 0.002266667  | -0.065566667 |
| ATP5E        |       | -0.1713      | -0.278066667 | 0.230566667  | -0.1188      | -0.146633333 |
| NUP93        |       | 0.123066667  | 0.152233333  | -0.118433333 | 0.0664       | -0.038066667 |
| ATF2         |       | 0.1143       | -0.0582      | 0.106533333  | 0.086466667  | -0.015766667 |
| EFCBP1       |       | 0.0753       | -0.0669      | -0.069433333 | -0.054166667 | 0.211733333  |
| EXOSC6       |       | 0.082033333  | 0.039733333  | -0.1303      | 0.1144       | 0.0604       |
| FLJ33630     |       | -0.0096      | -0.079666667 | -0.0144      | -0.067333333 | -0.046366667 |
| PPP4C        |       | -0.111666667 | 0.0519       | -0.049666667 | -0.1215      | -0.054266667 |
| CAP2         |       | -0.2104      | -0.054633333 | 0.362866667  | -0.140466667 | 0.108433333  |
| ZC3H7A       |       | -0.061333333 | 0.250966667  | 0.112        | 0.171666667  | 0.0673       |
| ZMYM1        |       | 0.036233333  | 0.105466667  | 0.0249       | 0.006033333  | 0.0238       |
| NSD1         |       | 0.094466667  | 0.021966667  | -0.021766667 | 0.119866667  | -0.051933333 |
| ZBTB8OS      |       | -0.1662      | 0.0305       | -0.1189      | -0.0772      | -0.133833333 |
| LOC648494    |       | -0.1109      | 0.092633333  | 0.056033333  | -0.0357      | -0.013033333 |
| MT1F         |       | -0.009766667 | -0.0752      | 0.041266667  | -0.0468      | 0.0087       |
| RAP1A        |       | 0.0016       | -8.00E-04    | -0.0255      | -0.077666667 | -0.063433333 |
| SPIN1        |       | -0.128933333 | -0.210533333 | 0.173633333  | 0.041333333  | -0.122033333 |
| PSMB10       |       | -0.134733333 | -0.140666667 | 0.008433333  | -0.0649      | -0.033033333 |
| USH1G        |       | -0.097233333 | 0.038666667  | -0.029       | -0.0127      | -0.0262      |
| NOLC1        |       | 0.3357       | 0.0997       | -0.180333333 | 0.259466667  | -0.083433333 |

|              |              |              |              |              |              |
|--------------|--------------|--------------|--------------|--------------|--------------|
| LOC100130715 | -0.136566667 | -0.0146      | 0.2897       | 0.120366667  | -0.050566667 |
| ASMTL        | 0.070866667  | 0.137        | 0.0245       | 0.047766667  | 0.1765       |
| C12orf11     | -0.092666667 | 0.106833333  | -0.004233333 | 0.0331       | 0.1412       |
| MREG         | 0.043566667  | 0.116466667  | -0.026633333 | -0.0017      | 0.0082       |
| TMCO1        | -0.005633333 | 0.063766667  | -0.033966667 | 0.036333333  | -0.011266667 |
| RPL26        | 0.0863       | -0.157666667 | -0.104       | 0.043433333  | -0.1671      |
| HYDIN        | 0.066466667  | -0.115333333 | 0.0651       | 0.043566667  | -0.0407      |
| SLC39A1      | -0.091066667 | -0.078233333 | 0.0829       | 0.003766667  | -0.047466667 |
| POLR2C       | 0.269433333  | 0.077366667  | 0.0287       | 0.083366667  | 0.141166667  |
| ZFC3H1       | 0.0058       | 0.040033333  | 0.086066667  | 0.099433333  | -0.007733333 |
| HSPC171      | 0.0036       | 0.055833333  | -0.1004      | 0.051266667  | -0.0523      |
| ITPKB        | -0.0532      | -0.1054      | 0.1193       | -0.090566667 | -0.0052      |
| CBX5         | 0.454133333  | 0.024233333  | 0.214966667  | 0.287066667  | 0.056266667  |
| SIPA1L3      | -0.183866667 | -0.038333333 | 0.013266667  | -0.1384      | -0.120733333 |
| CARD16       | 0.057533333  | -0.043233333 | 0.0486       | -0.010466667 | 0.0246       |
| LOC728312    | 0.2931       | 0.083833333  | -0.0522      | 0.163366667  | -0.014566667 |
| C7orf36      | -0.019533333 | 0.046033333  | 0.022266667  | -0.049466667 | 0.087233333  |
| LOC645175    | 0.123933333  | 0.146266667  | -0.1338      | 0.071766667  | 0.055466667  |
| FRS3         | -0.1442      | -0.049966667 | -0.0294      | -0.1547      | -0.097233333 |
| NEK3         | 0.0669       | -0.0864      | 0.0681       | -0.121566667 | -0.167066667 |
| LOC285900    | 0.013833333  | -0.0851      | -0.016333333 | -0.0057      | -0.093533333 |
| FAM13A       | -0.094133333 | -0.084       | 0.0337       | -0.0366      | -0.1571      |
| LOC644604    | 0.0658       | 0.027866667  | -0.024533333 | 0.014666667  | 0.0016       |
| BCORL1       | -0.028433333 | -0.036466667 | 0.046866667  | 0.016166667  | -0.0673      |
| C1orf144     | 0.306933333  | 0.0915       | -0.074833333 | 0.171433333  | 0.111966667  |
| LOC731308    | -0.342833333 | 0.348866667  | -0.351933333 | -0.395466667 | 0.331033333  |
| FGL1         | 0.003333333  | -0.069666667 | -0.003266667 | -0.0645      | -0.021333333 |
| HKDC1        | -0.215766667 | -0.0639      | 0.2255       | -0.2035      | -0.0128      |
| SYCP2        | -0.0706      | -0.0054      | 0.020233333  | -0.0599      | -0.025566667 |
| LOC388969    | -0.157766667 | -0.055866667 | -0.152733333 | -0.246366667 | -0.06        |
| LOC100129191 | 0.0409       | -0.002366667 | 0.061633333  | 0.223266667  | -0.1456      |
| RNF19A       | -0.0704      | -0.122266667 | 0.240066667  | 0.041766667  | -0.027633333 |
| LOC550112    | 0.020233333  | -0.073266667 | -0.017066667 | -0.150766667 | -0.0055      |
| ZBED1        | -0.045866667 | 0.022966667  | -0.108333333 | 0.101266667  | -0.1297      |
| CNIH         | 0.166433333  | -0.044966667 | 0.196733333  | 0.033566667  | -0.0228      |
| RAB28        | -0.0171      | 0.096766667  | -0.019166667 | -0.006333333 | 0.0028       |
| LOC400013    | 0.173        | 0.147666667  | -0.101833333 | 0.089666667  | -0.002033333 |
| ROM1         | -0.106       | 0.0501       | 0.190433333  | 0.0252       | 0.0174       |
| LOC646093    | -0.400233333 | 0.221866667  | -0.342033333 | -0.308266667 | 0.0625       |
| SEC23A       | 0.022933333  | 0.141066667  | -0.016266667 | -0.031633333 | 0.078166667  |
| PURB         | 0.282166667  | -0.074966667 | -0.136266667 | 0.144133333  | -0.187033333 |
| FAF1         | 0.177933333  | -0.041066667 | 0.0821       | 0.176133333  | -0.103666667 |
| HNRPM        | 0.134566667  | 0.037833333  | 0.0233       | 0.187766667  | 0.051633333  |
| LOC100132247 | 0.1345       | -0.133933333 | 0.037566667  | 0.1481       | -0.2313      |
| TLK2         | -0.096166667 | -0.001633333 | -0.010666667 | -0.0261      | -0.1841      |
| RPN2         | -0.0721      | -0.1094      | -0.0836      | -0.1538      | -0.022766667 |
| MYCBP        | 0.1116       | 0.114833333  | -0.120833333 | 0.017        | 0.0561       |

|              |              |              |              |              |              |
|--------------|--------------|--------------|--------------|--------------|--------------|
| AZI2         | -0.199633333 | 0.005933333  | 0.112866667  | -0.011233333 | -0.1099      |
| PA2G4        | 0.2355       | 0.059433333  | 0.034266667  | 0.220933333  | 0.0351       |
| SCYL2        | -0.056233333 | -0.261533333 | 0.049533333  | -0.067533333 | -0.0423      |
| TESK1        | 0.0345       | -0.005666667 | -0.030633333 | 0.143566667  | -0.095533333 |
| LOC347292    | -0.199466667 | 0.013866667  | -0.0208      | -0.003       | -0.177933333 |
| RAB40B       | -0.1909      | -0.155833333 | -0.138533333 | -0.3169      | -0.0123      |
| DPH3         | 0.080566667  | 0.194066667  | -0.1571      | 0.096633333  | 0.075066667  |
| TBC1D3F      | 0.042066667  | -0.064266667 | -0.056833333 | -0.041166667 | -0.148       |
| NRG1         | 0.377533333  | 0.250733333  | -0.2421      | 0.4079       | 0.1287       |
| MFAP3        | 0.049266667  | 0.0064       | -0.017166667 | 0.113        | -0.0722      |
| CIR1         | -0.034733333 | 0.036966667  | -0.034866667 | -0.050166667 | -0.021133333 |
| FLJ36131     | 0.0797       | 0.592266667  | -0.168133333 | -0.081866667 | 0.342066667  |
| SRPK2        | -0.559433333 | -0.216966667 | -0.0093      | -0.4942      | -0.204766667 |
| TIAL1        | 0.005633333  | 0.189333333  | -0.017666667 | 0.0617       | -0.011433333 |
| PIP5K1A      | 0.1452       | -0.003933333 | 0.0441       | 0.239133333  | -0.088533333 |
| LOC341457    | 0.020733333  | 0.120666667  | -0.018266667 | -0.026266667 | 0.015        |
| NUPL2        | 0.256366667  | 0.009566667  | -0.0404      | 0.166766667  | 0.0107       |
| LOC100131810 | -0.0592      | 0.0543       | -0.055033333 | -0.0907      | 0.089733333  |
| LOC100128084 | -0.218666667 | 0.621666667  | -0.236233333 | -0.1259      | 0.079766667  |
| LOC650128    | -0.0249      | 0.051        | 0.023433333  | -0.029066667 | -0.1495      |
| STAG1        | 0.223333333  | 0.0498       | -0.265566667 | 0.111966667  | -0.098766667 |
| RBX1         | 0.085466667  | 0.0807       | -0.008766667 | 0.164633333  | -0.023266667 |
| MBTPS1       | -0.126033333 | -0.243733333 | -0.009566667 | -0.271833333 | -0.167366667 |
| SRM          | 0.2031       | 0.057266667  | -0.110633333 | 0.2008       | -0.031233333 |
| DST          | 0.052833333  | 0.008466667  | 0.263666667  | 0.082766667  | -0.0274      |
| MANBA        | -0.127766667 | -0.071533333 | 0.036666667  | -0.143633333 | -0.135433333 |
| AP1G2        | -0.197566667 | -0.0641      | 0.024233333  | -0.259233333 | -0.112       |
| C1orf212     | 0.126266667  | 0.049966667  | -0.337       | -0.1106      | 0.019666667  |
| LOC728207    | -0.270433333 | 0.099366667  | -0.186566667 | -0.255566667 | 0.063233333  |
| PPIC         | -0.2221      | -0.170866667 | 0.223366667  | -0.192066667 | 0.002466667  |
| FKBP5        | 0.263066667  | 0.004733333  | -0.001833333 | 0.1775       | -0.096666667 |
| COL7A1       | -0.268933333 | 0.002066667  | -0.004366667 | -0.314466667 | -0.0308      |
| STARD10      | -0.145466667 | -0.048933333 | 0.153        | -0.199866667 | -0.038       |
| LOC652458    | 0.086966667  | -0.045       | -0.060333333 | -0.039633333 | -0.0428      |
| LRRFIP1      | -0.0889      | 0.381833333  | 0.087266667  | -0.0599      | 0.287033333  |
| CBX4         | -0.014133333 | 0.021933333  | -0.095233333 | 0.008766667  | -0.045066667 |
| SIGIRR       | -0.240966667 | -0.087966667 | 0.312933333  | -0.3035      | 0.013633333  |
| TRIM35       | 0.147633333  | 0.014433333  | -0.156266667 | -0.0164      | -0.0298      |
| DPM1         | 0.0644       | 0.049966667  | 0.029833333  | 0.062933333  | 0.0215       |
| EFTUD2       | 0.131        | -0.047666667 | 0.0473       | 0.094333333  | -9.00E-04    |
| GNB2L1       | -0.019533333 | 0.0782       | 0.020533333  | -0.042233333 | 0.0929       |
| RALBP1       | 0.057066667  | 0.137933333  | -0.117833333 | 0.089666667  | -0.0316      |
| HARS         | 0.102433333  | -0.054233333 | 0.049166667  | -0.022833333 | 0.011        |
| PLCG1        | -0.018466667 | -0.051133333 | 0.1355       | 0.061333333  | -0.119833333 |
| FAM189B      | -0.1979      | -0.0857      | 0.264433333  | -0.233233333 | 0.0151       |
| LOC653381    | -0.1043      | -0.0149      | 0.015733333  | -0.089466667 | -0.004766667 |
| BRD9         | 0.152466667  | -0.002133333 | -0.036666667 | -0.013433333 | 0.117        |

|              |              |              |              |              |              |
|--------------|--------------|--------------|--------------|--------------|--------------|
| SNAI2        | -0.0531      | -0.053166667 | 0.023266667  | -0.010233333 | -0.0415      |
| ANXA4        | -0.371166667 | -0.172566667 | 0.073366667  | -0.241       | -0.1484      |
| C14orf19     | -0.419966667 | 0.109866667  | -0.0496      | -0.304066667 | -0.010266667 |
| SLC25A1      | -0.1274      | -0.214766667 | 0.193933333  | -0.198666667 | -0.0933      |
| LOC648695    | 0.184033333  | 0.1638       | -0.004866667 | 0.069633333  | 0.1579       |
| PANK4        | 0.026733333  | 0.135566667  | 0.103466667  | 0.185566667  | 0.030433333  |
| LOC402644    | -0.124633333 | 0.0474       | -0.1847      | -0.172066667 | -0.0795      |
| CNDP2        | -0.096433333 | -0.0345      | -0.0179      | 0.003133333  | -0.068833333 |
| SUZ12        | 0.140566667  | -0.033766667 | 0.070066667  | 0.1101       | 0.0677       |
| MTFR1        | 0.2392       | -0.032533333 | 0.1787       | 0.1467       | 0.152366667  |
| SNX33        | -0.106933333 | -0.208133333 | 0.144766667  | -0.006933333 | -0.202866667 |
| SIK3         | 0.142933333  | -0.120766667 | 0.044433333  | 0.102266667  | -0.042166667 |
| RAP1B        | -0.016266667 | -0.016933333 | 0.054633333  | -0.000266667 | 0.1074       |
| RALGAPB      | 0.052633333  | -0.047266667 | 0.0615       | -0.0243      | -0.0195      |
| LOC389342    | -0.092466667 | -0.0812      | 0.094933333  | 1.00E-04     | -0.0118      |
| LOC100128203 | 0.046066667  | 0.175        | -0.025433333 | 0.000233333  | 0.111533333  |
| LOC647322    | -0.036466667 | -0.058933333 | 0.034566667  | -0.086566667 | 0.089166667  |
| C6orf211     | -0.154933333 | 0.150166667  | -0.029966667 | -0.085766667 | 0.0393       |
| VCP          | 0.15         | -0.008866667 | -0.013866667 | 0.029566667  | 0.059        |
| BRE          | -0.335       | -0.150666667 | 0.232066667  | -0.306666667 | -0.1272      |
| C2orf32      | 0.133166667  | 0.0879       | -0.0158      | 0.147066667  | 0.068866667  |
| CDC14A       | 0.0991       | 0.1328       | 0.028433333  | 0.120233333  | 0.074966667  |
| SLC38A7      | -0.150933333 | -0.0431      | -0.2113      | -0.122266667 | -0.118166667 |
| LOC729086    | 0.344333333  | 0.269833333  | -0.211       | 0.3576       | 0.259966667  |
| SNRPN        | -0.276366667 | -0.157266667 | 0.222        | -0.284033333 | -0.047466667 |
| KDELR2       | 0.115066667  | -0.0583      | 0.194966667  | 0.037866667  | -0.028233333 |
| 5-Mar        | -0.3794      | 0.0808       | 0.262833333  | -0.328233333 | 0.048633333  |
| ZNF493       | 0.0581       | -0.091733333 | -0.034733333 | -0.1354      | 0.013933333  |
| C14orf166    | -0.059633333 | -0.0125      | 0.0335       | 0.079033333  | -0.0611      |
| SLC6A6       | -0.063466667 | -0.091       | -0.011033333 | 0.055266667  | -0.077933333 |
| PNN          | 0.385433333  | 0.119533333  | -0.1876      | 0.2439       | 0.0518       |
| KIF2C        | 0.2179       | 0.204533333  | -0.0827      | 0.2005       | 0.0904       |
| STOML1       | -0.116433333 | 0.0656       | -0.095466667 | -0.018866667 | -0.078266667 |
| TTLL3        | -0.073033333 | -0.089233333 | 0.0074       | -0.0809      | -0.1021      |
| TTC26        | -0.027166667 | 0.015866667  | -0.0593      | -0.013266667 | -0.003066667 |
| ARFGAP3      | -0.285366667 | -0.064666667 | 0.190233333  | -0.197133333 | -0.0313      |
| ZFP37        | -0.086166667 | -0.050033333 | -0.016       | -0.0331      | -0.096733333 |
| HNRNPA1      | 0.356166667  | 0.108533333  | 0.004733333  | 0.333533333  | 0.059566667  |
| CHTF18       | 0.3084       | 0.071866667  | -0.062666667 | 0.174933333  | 0.050433333  |
| MMGT1        | 0.1178       | 0.030966667  | -0.065833333 | 0.0114       | -0.035166667 |
| LOC652726    | 0.136033333  | -0.028733333 | 0.1772       | 0.002333333  | 0.032433333  |
| C5orf46      | 0.075766667  | 0.122866667  | -0.361533333 | 0.026666667  | 0.052566667  |
| ZNF770       | 0.060633333  | -0.034833333 | 0.032466667  | 0.046166667  | 0.0316       |
| NBPF1        | 0.193433333  | 0.142833333  | 0.001466667  | 0.115166667  | 0.094433333  |
| ARHGEF19     | 0.156466667  | 0.068933333  | 0.030333333  | -0.0428      | 0.191366667  |
| APPL1        | -0.0147      | -0.018566667 | 0.1773       | 0.078733333  | 0.020033333  |
| EGLN1        | 0.250033333  | -0.1324      | 0.216966667  | 0.065966667  | -0.0068      |

|              |              |              |              |              |              |
|--------------|--------------|--------------|--------------|--------------|--------------|
| LOC407835    | -0.0414      | -0.213366667 | 0.119766667  | -0.006266667 | -0.178333333 |
| ATG4C        | -0.0306      | 0.121666667  | -0.0029      | 0.0155       | -0.018633333 |
| FAM45A       | -0.1976      | -0.150266667 | -0.0506      | -0.157133333 | -0.2         |
| LOC100129902 | 0.0492       | -0.0784      | 0.0283       | -0.074033333 | 0.083633333  |
| CHMP5        | 0.151566667  | -0.008966667 | -0.0149      | -0.0609      | 0.028333333  |
| SP3          | 0.315033333  | -0.194866667 | 0.1832       | 0.1097       | 0.2325       |
| TMEM184B     | 0.1793       | 0.030833333  | -0.0384      | 0.0902       | -0.014066667 |
| LYPLA2       | -0.075966667 | -0.141566667 | 0.073033333  | -0.1366      | -0.0954      |
| NOVA1        | -0.0506      | -0.051       | 0.101166667  | -0.2024      | 0.102933333  |
| ROBO3        | -0.105366667 | -0.128333333 | 0.0507       | -0.1496      | -0.131433333 |
| NOC2L        | 0.360566667  | 0.046666667  | -0.2716      | 0.128233333  | -0.058833333 |
| C6orf48      | -0.2275      | -0.285533333 | -0.1896      | -0.095966667 | -0.319766667 |
| TMEM218      | -0.230366667 | -0.012566667 | -0.0207      | -0.203266667 | 0.021966667  |
| POLR3B       | 0.004266667  | 0.0296       | 0.017866667  | 0.098466667  | 0.022333333  |
| TMOD3        | -0.0464      | 0.041866667  | 0.245833333  | 0.1463       | 0.088933333  |
| ZC3H10       | 0.069        | -0.240133333 | -0.150366667 | -0.035033333 | -0.099666667 |
| DHX30        | 0.296666667  | 0.1332       | 0.002266667  | 0.233233333  | 0.039166667  |
| THOC2        | 0.033466667  | -0.024833333 | 0.182566667  | -0.0854      | 0.111033333  |
| SLC35D1      | 0.151433333  | -0.088533333 | -0.0454      | 0.0567       | -0.0415      |
| CREBL1       | 0.116733333  | -0.079766667 | -0.018066667 | 0.094266667  | -0.222266667 |
| RAD51        | 0.295033333  | 0.0022       | 0.030933333  | 0.2898       | -0.062533333 |
| NY-REN-7     | 0.093866667  | -0.192766667 | 0.024933333  | 0.0296       | -0.1309      |
| ATP5G2       | -0.165766667 | -0.037466667 | 0.0785       | -0.052466667 | 0.015666667  |
| LARP7        | -0.014533333 | -0.0804      | 0.014566667  | 0.071133333  | -0.019       |
| C11orf61     | 0.2463       | 0.208166667  | -0.0684      | 0.151        | 0.063566667  |
| ATG2A        | -0.214666667 | -0.137566667 | 0.035833333  | -0.202033333 | -0.1592      |
| LOC392713    | 0.139833333  | 0.096333333  | -0.138366667 | -0.0272      | -0.037333333 |
| APITD1       | 0.2125       | 0.053466667  | -0.102533333 | 0.146666667  | 0.087766667  |
| YTHDC2       | -0.010166667 | -0.0065      | 0.004733333  | -0.099533333 | 0.110366667  |
| STK16        | -0.077866667 | -0.012166667 | -0.2628      | 0.0738       | -0.270333333 |
| CNIH4        | -0.020033333 | -0.007433333 | 0.0489       | -0.0861      | 0.019033333  |
| OR2A9P       | -0.048866667 | 0.015733333  | 0.076033333  | -0.034733333 | -0.005733333 |
| FBXW11       | 0.245833333  | -0.0932      | -0.019766667 | 0.0738       | 0.014        |
| ZBTB39       | -0.0535      | 0.026233333  | 0.044366667  | -0.006       | 0.0405       |
| FAM164A      | -0.264466667 | -0.086633333 | -0.000833333 | -0.114133333 | -0.123933333 |
| CASP7        | 0.364433333  | 0.079466667  | -0.1306      | 0.196166667  | 0.007366667  |
| PAICS        | 0.265        | 0.017133333  | -0.0709      | 0.093766667  | 0.009666667  |
| CLPTM1L      | 0.342166667  | 0.010766667  | -0.1567      | 0.157033333  | -0.0605      |
| FAM108A2     | 0.085666667  | -0.135266667 | 0.124066667  | 0.038166667  | -0.074733333 |
| BBS1         | -0.2458      | -0.1486      | 0.0609       | -0.1666      | -0.153166667 |
| TRAK2        | -0.081433333 | 0.018933333  | -0.086666667 | -0.149733333 | 0.006566667  |
| ZCCHC8       | 0.178033333  | 0.047533333  | -0.1243      | 0.129966667  | -0.023666667 |
| ZNF248       | 0.023566667  | 0.033366667  | -0.107       | -0.0115      | 0.056866667  |
| KDELC2       | 0.210966667  | -0.025566667 | 0.037566667  | 0.014566667  | -0.0018      |
| SPATA2       | -0.022566667 | 0.0354       | -0.156533333 | 0.014533333  | -0.2052      |
| PLEKHF2      | -0.0282      | -0.1981      | 0.0855       | -0.0502      | 0.107        |
| RAPGEF1      | 0.0759       | 0.018066667  | -0.1097      | 0.0732       | -0.072033333 |

|              |              |              |              |              |              |
|--------------|--------------|--------------|--------------|--------------|--------------|
| SERPINE2     | 0.0935       | -0.0936      | -0.1057      | 0.031333333  | -0.010466667 |
| DLST         | 0.223733333  | -0.038466667 | -0.001133333 | 0.062233333  | -0.1078      |
| FIG4         | -0.265166667 | 0.010866667  | -0.0929      | -0.251333333 | -0.019533333 |
| TKT          | -0.077933333 | -0.1616      | 0.047        | -0.052433333 | -0.063933333 |
| LMNA         | 0.002833333  | -0.0033      | 0.2851       | -0.0625      | 0.0432       |
| LOC391670    | 0.046133333  | 0.187833333  | -0.1024      | 0.002133333  | 0.198233333  |
| ETFDH        | -0.305466667 | -0.0993      | -0.0562      | -0.311233333 | -0.181833333 |
| LOC728554    | 0.2206       | 0.175433333  | -0.120333333 | 0.1114       | 0.148233333  |
| STT3B        | 0.320466667  | 0.1466       | 0.044566667  | 0.198566667  | 0.126666667  |
| ZNF322B      | -0.1883      | 0.019        | -0.065033333 | -0.060033333 | -0.101166667 |
| RPS12        | -0.021266667 | -0.0225      | 0.093333333  | 0.001466667  | 0.0423       |
| LOC732450    | -0.013133333 | 0.094366667  | -0.043866667 | 0.0764       | -0.0837      |
| LSM3         | 0.1383       | 0.029166667  | -0.065266667 | 0.123866667  | 0.0475       |
| ZDHHC8P      | -0.051733333 | 0.1082       | -0.109766667 | -0.115766667 | 0.014133333  |
| RHOQ         | -0.240466667 | -0.3399      | 0.189566667  | -0.2833      | -0.0065      |
| BEND3        | 0.212733333  | 0.054666667  | 0.065733333  | 0.240966667  | -0.028333333 |
| LOC145783    | 0.103533333  | 0.025333333  | 0.126466667  | 0.240833333  | 0.054333333  |
| RPL35        | 0.1335       | 0.0963       | -0.001966667 | 0.1107       | -0.003666667 |
| RWDD2A       | -0.2813      | -0.103166667 | 0.062633333  | -0.282866667 | -0.034733333 |
| EGFR         | 0.286833333  | 0.0986       | 0.0664       | 0.319        | 0.083966667  |
| LOC645605    | 0.000766667  | -0.018033333 | 0.113833333  | 0.115866667  | -0.094666667 |
| LOC645609    | -0.002533333 | -0.113366667 | 0.0247       | 0.031433333  | -0.135533333 |
| MGAT2        | 0.25         | 0.020933333  | -0.156666667 | 0.117566667  | -0.102433333 |
| FBXO8        | -0.007233333 | 0.068033333  | -0.003166667 | 0.0565       | 0.0077       |
| ZNF513       | -0.3173      | -0.1882      | 0.158833333  | -0.304933333 | -0.113833333 |
| ANKRD29      | 0.005533333  | -0.104866667 | 0.094466667  | -0.023533333 | -0.051666667 |
| LOC648103    | -0.148966667 | 0.179033333  | -0.279966667 | -0.299166667 | 0.191066667  |
| LOC100133017 | 0.072733333  | 0.109333333  | 0.0364       | 0.071066667  | 0.078366667  |
| RNGTT        | -0.0817      | 0.1523       | 0.0513       | -0.142466667 | 0.110866667  |
| LOC653737    | -0.460766667 | 0.039266667  | 0.090966667  | -0.108       | -0.085933333 |
| FIS1         | -0.1407      | -0.1481      | 0.049266667  | -0.129133333 | -0.073633333 |
| RAD51C       | 0.221866667  | 0.082066667  | -0.1557      | 0.082533333  | 0.024933333  |
| HNRNPA2B1    | 0.118633333  | 0.1551       | -0.166066667 | -0.096933333 | -0.017466667 |
| BMI1         | -0.060766667 | -0.1579      | 0.076866667  | -0.0926      | 0.0881       |
| SCNM1        | 0.2124       | -0.052933333 | -0.1252      | 0.127733333  | -0.0232      |
| ZNF232       | 0.280733333  | 0.024333333  | -0.014066667 | 0.305966667  | -0.049033333 |
| GIT1         | 0.15         | -0.103833333 | 0.011233333  | 0.164666667  | -0.085866667 |
| TSTD1        | 0.1908       | -0.021666667 | 0.050833333  | 0.149766667  | -0.062266667 |
| LOC642109    | -0.1596      | 0.2061       | -0.177666667 | -0.141533333 | 0.077366667  |
| LOC654000    | 0.0503       | -0.0289      | -0.059033333 | -0.048966667 | -0.092       |
| EDNRB        | -0.001733333 | -0.055966667 | 0.1717       | -0.018033333 | 0.001966667  |
| TTF2         | 0.155266667  | -0.008833333 | 0.068966667  | 0.068633333  | -0.035633333 |
| ZNF549       | -0.173033333 | 0.4179       | -0.062533333 | -0.025233333 | 0.036333333  |
| TRIM66       | -0.107766667 | -0.075066667 | -0.010433333 | -0.0703      | -0.109266667 |
| METTL3       | 0.059166667  | 0.0786       | 0.200766667  | 0.091133333  | 0.086833333  |
| PSMG3        | 0.140633333  | 0.119133333  | -0.122166667 | 0.064866667  | 0.0096       |
| MEX3C        | -0.1537      | 0.072533333  | 0.312733333  | -0.0736      | 0.2716       |

|           |              |              |              |              |              |
|-----------|--------------|--------------|--------------|--------------|--------------|
| TFE3      | -0.0848      | 0.091166667  | -0.059566667 | -0.1263      | 0.008033333  |
| SLC12A2   | -0.157266667 | 0.025933333  | 0.141566667  | -0.169833333 | 0.200733333  |
| SKIV2L    | -0.219766667 | 0.024933333  | 0.0591       | -0.176266667 | -0.0419      |
| MFAP3L    | 0.058966667  | 0.061266667  | -0.1435      | -0.104333333 | 0.058566667  |
| FAM120B   | -0.303566667 | -0.1449      | 0.194166667  | -0.463566667 | -0.0323      |
| LLGL1     | 0.0085       | -0.1324      | 0.087333333  | -0.061266667 | -0.0768      |
| TMEM110   | 0.056166667  | 0.007        | -0.008733333 | 0.0092       | -0.1021      |
| FNIP2     | 0.0017       | -0.038966667 | 0.0209       | -0.116633333 | -0.083466667 |
| KBTBD4    | 0.1526       | -0.0105      | -0.1084      | -0.012433333 | 0.003033333  |
| TADA2B    | 0.146233333  | -0.131966667 | -0.0381      | 0.1462       | -0.0742      |
| DCAF15    | 0.226633333  | 0.114666667  | 0.013633333  | 0.058766667  | 0.1316       |
| SCOC      | -0.125766667 | -0.088366667 | 0.1005       | -0.153033333 | 0.0683       |
| RANBP2    | 0.104366667  | 0.023833333  | -0.0666      | 0.089766667  | -0.0527      |
| PUM2      | 0.047066667  | 0.0066       | 0.064366667  | 0.044433333  | -0.099933333 |
| SLC39A14  | -0.006833333 | 0.037466667  | -0.1552      | 0.0217       | -0.209266667 |
| SF3A1     | 0.2351       | 0.047333333  | -0.063666667 | 0.133433333  | -0.060666667 |
| MNT       | -0.299733333 | -0.119066667 | 0.101633333  | -0.251066667 | -0.0463      |
| KIF5B     | 0.243633333  | 0.141633333  | -0.0343      | 0.162433333  | 0.0472       |
| C16orf56  | 0.3349       | 0.0213       | -0.076766667 | 0.2756       | -0.048066667 |
| LRSAM1    | -0.227833333 | -0.125333333 | 0.068733333  | -0.200766667 | -0.1214      |
| IL25      | 0.025066667  | 0.120066667  | -0.044833333 | 0.147533333  | -0.025133333 |
| MGC12760  | -0.119366667 | 0.522566667  | -0.111933333 | -0.038166667 | 0.242166667  |
| HNRNPK    | 0.3531       | 0.069266667  | -0.057666667 | 0.158933333  | 0.093566667  |
| FAM98C    | 0.017066667  | -0.081466667 | 0.110733333  | -0.003833333 | 0.007066667  |
| XAB2      | 0.012933333  | 0.086866667  | 0.034933333  | 0.087933333  | 0.033833333  |
| ZFP161    | 0.2204       | 0.0578       | -0.116266667 | 0.037933333  | 0.146466667  |
| CENPC1    | -0.087033333 | 0.207666667  | 0.016633333  | 0.078033333  | 0.0592       |
| ZNF443    | 0.099333333  | 0.078833333  | 0.016        | 0.0926       | -0.150666667 |
| KIAA0368  | 0.090433333  | -0.087033333 | -0.0806      | 0.042533333  | -0.080233333 |
| LOC389435 | -0.061166667 | 0.0428       | 0.0448       | 0.010433333  | -0.033933333 |
| LOC731999 | 0.0351       | 0.0124       | 0.036866667  | -0.099       | 0.002133333  |
| ZNF346    | 0.121866667  | -0.0479      | -0.146433333 | -0.115966667 | -0.127966667 |
| XPO7      | 0.0769       | 0.067533333  | 0.163033333  | 0.096966667  | 0.1327       |
| RELL2     | -0.029233333 | -0.0471      | 0.004733333  | 0.015133333  | -0.046066667 |
| HLA-A     | -0.080266667 | -0.1843      | 0.0429       | 0.009266667  | -0.122366667 |
| NUP37     | 0.1615       | 0.015066667  | -0.0444      | 0.0414       | 0.005966667  |
| SLC6A15   | 0.189133333  | 0.089066667  | -0.123233333 | 0.0671       | 0.024366667  |
| FLJ20489  | -0.1477      | -0.056766667 | 0.186433333  | -0.160233333 | -0.0935      |
| ARSK      | -0.0262      | -0.047466667 | -0.046833333 | -0.090466667 | -0.097266667 |
| CHPF      | 0.071366667  | -0.206733333 | 0.0127       | -0.032233333 | -0.0722      |
| C6orf62   | -0.359133333 | -0.092833333 | 0.017466667  | -0.281033333 | -0.114333333 |
| EXOC6     | 0.190733333  | -0.032133333 | 0.184866667  | 0.113533333  | 0.000266667  |
| POLB      | -0.3144      | -3.33E-05    | 0.165566667  | -0.279333333 | -0.003133333 |
| ASAH1     | -0.118666667 | -0.034233333 | -0.092433333 | -0.196266667 | 0.0114       |
| DUXAP3    | -0.1615      | 0.6658       | -0.2323      | -0.0909      | 0.095933333  |
| LRRC47    | -0.01        | 0.057733333  | -0.221466667 | -0.0529      | -0.059433333 |
| CYP26B1   | -0.107533333 | 0.0002       | 0.107966667  | -0.1397      | 0.0479       |



|              |              |              |              |              |              |
|--------------|--------------|--------------|--------------|--------------|--------------|
| LOC653264    | -0.021933333 | 0.0122       | -0.076666667 | -0.0862      | -0.065533333 |
| LOC285047    | -0.0575      | -0.034566667 | 0.0239       | 0.031233333  | -0.061       |
| C14orf145    | 0.0948       | 0.066766667  | -0.049066667 | 0.0645       | 0.125966667  |
| P76          | -0.0996      | -0.101166667 | 0.0663       | -0.007666667 | -0.094333333 |
| PRAME        | -0.169933333 | 0.028266667  | 0.323        | -0.191366667 | -0.018166667 |
| TYW1         | 0.082833333  | 0.014066667  | -0.043066667 | -0.0179      | 0.0287       |
| SURF2        | 0.135133333  | 0.168566667  | -0.2126      | 0.124        | 0.0312       |
| ZNF77        | 0.092866667  | -0.013666667 | -0.1389      | -0.156966667 | -0.030833333 |
| LDLRAP1      | -0.0081      | -0.130733333 | 0.0365       | -0.010533333 | -0.156566667 |
| PARP6        | 0.0858       | -0.0433      | -0.077833333 | 0.018466667  | -0.154666667 |
| RCC1         | 0.53         | 0.038266667  | -0.0875      | 0.280966667  | 0.049766667  |
| FAM38A       | 0.0122       | -0.089633333 | 0.063566667  | -0.017833333 | -0.095866667 |
| EIF3G        | -0.035833333 | -0.0431      | 0.013766667  | -0.008766667 | -0.050966667 |
| LOC730995    | 0.058766667  | -0.037333333 | 0.164133333  | 0.067333333  | 0.047266667  |
| ITPA         | -0.144766667 | 0.082533333  | 0.041033333  | -0.2262      | 0.092133333  |
| SETD2        | 0.012466667  | -0.014333333 | 0.035166667  | 0.118366667  | -0.1162      |
| RCHY1        | 0.141833333  | 0.0023       | -0.0874      | 0.089966667  | 0.012633333  |
| CTCF         | 0.2979       | -0.034033333 | 0.0959       | 0.1542       | 0.0469       |
| GOLT1B       | 0.030366667  | -0.317933333 | 0.040966667  | -0.071866667 | 0.087666667  |
| TROAP        | 0.1868       | 0.099133333  | 0.113833333  | 0.216033333  | -0.040266667 |
| SDAD1        | -0.040266667 | -0.154333333 | 0.092133333  | -0.0448      | -0.041666667 |
| XIST         | 0.0705       | 0.010133333  | 0.1644       | 0.047566667  | -0.077       |
| LOC100131609 | 0.009566667  | 0.069466667  | 0.101766667  | 0.049633333  | 0.036666667  |
| NBN          | 0.0767       | -0.1777      | 0.1334       | -0.020133333 | 0.033166667  |
| LOC653115    | -0.502266667 | 0.1756       | -0.0031      | -0.3686      | -0.041466667 |
| MEPCE        | 0.171733333  | 0.3045       | 0.0092       | 0.207533333  | 0.110966667  |
| SLC17A9      | 0.229566667  | 0.1539       | 0.063233333  | 0.263366667  | 0.126766667  |
| GTPBP6       | 0.091866667  | 0.0522       | -0.114433333 | -0.0441      | 0.108166667  |
| CDC42EP4     | -0.172733333 | -0.037933333 | 0.218033333  | -0.1016      | -0.0691      |
| LOC285412    | 0.0701       | -0.031766667 | -0.079533333 | 0.0484       | -0.0545      |
| CWF19L1      | 0.161466667  | 0.069166667  | -0.0646      | 0.061333333  | 0.081166667  |
| CHPT1        | 0.177666667  | 0.021666667  | -0.0871      | 0.040066667  | 0.120133333  |
| LOC729375    | -0.112       | 0.0063       | -0.056433333 | -0.2387      | 0.107        |
| SET          | 0.170933333  | -0.012233333 | -0.1226      | 0.0209       | -0.071566667 |
| BPNT1        | -0.141466667 | -0.048333333 | 0.228366667  | 0.048066667  | -0.021333333 |
| ILF3         | 0.437533333  | 0.098166667  | -0.063066667 | 0.251433333  | 0.043033333  |
| LOC729332    | -0.4833      | 0.1684       | -0.502133333 | -0.483933333 | 0.077        |
| TMF1         | 0.084833333  | -0.0304      | 0.110533333  | 0.121566667  | -0.031633333 |
| IFP38        | -0.2399      | -0.114933333 | -0.074066667 | -0.0865      | -0.167966667 |
| C21orf63     | 0.0659       | 0.124266667  | -0.059       | 0.083166667  | -0.056333333 |
| CCNB1IP1     | -0.2624      | -0.084766667 | -0.237766667 | -0.096166667 | -0.218266667 |
| SNRPF        | 0.243766667  | 0.037066667  | -0.0721      | 0.187033333  | 0.001033333  |
| LOC100133931 | -0.0385      | 0.087933333  | -0.037733333 | -0.044733333 | -0.024333333 |
| GRSF1        | 0.0234       | 0.156966667  | -0.008       | 0.0869       | -0.067766667 |
| MAGED2       | -0.211766667 | -0.015866667 | 0.054966667  | -0.132566667 | -0.172066667 |
| MOSPD2       | -0.307633333 | -0.1116      | 0.230666667  | -0.228433333 | 0.001466667  |
| SNORD30      | 0.439633333  | 0.142133333  | -0.2099      | 0.2266       | 0.039233333  |

|           |              |              |              |              |              |
|-----------|--------------|--------------|--------------|--------------|--------------|
| MRPS28    | 0.0736       | 0.244866667  | -0.0922      | 0.023733333  | 0.120133333  |
| DTWD2     | -0.309066667 | 0.609733333  | -0.127233333 | -0.085633333 | 0.1844       |
| SLC31A1   | -0.02        | -0.1683      | -0.1108      | 0.0191       | -0.2406      |
| TOP1P1    | 0.018066667  | 0.2556       | -0.021166667 | 0.0012       | 0.1481       |
| ATPAF2    | -0.0802      | -0.1091      | 0.048        | -0.149933333 | 0.023166667  |
| FOXO4     | -0.4733      | -0.028566667 | 0.221233333  | -0.2644      | -0.074566667 |
| MGA       | 0.065366667  | -0.008933333 | 0.123433333  | 0.030233333  | 0.186533333  |
| SLC25A26  | 0.1397       | -0.111666667 | 0.088166667  | 0.0728       | -0.0299      |
| ZP3       | -0.067433333 | 0.061433333  | -0.026833333 | -0.009566667 | -0.1199      |
| JMJD8     | -0.0989      | -0.026866667 | 0.081833333  | -0.129066667 | 0.010333333  |
| LOC651436 | 0.026466667  | -0.0813      | 0.083133333  | 0.067433333  | -0.052366667 |
| LOC728689 | -0.016766667 | -0.026133333 | -0.097133333 | 0.004        | -0.060633333 |
| PRKAR2A   | 0.120133333  | 0.009633333  | 0.1708       | 0.059866667  | 0.114533333  |
| KIFC1     | 0.304933333  | 0.193933333  | -0.052966667 | 0.2753       | -0.008466667 |
| ANAPC4    | -0.0949      | 0.0894       | 0.133766667  | -0.033566667 | 0.095333333  |
| PDSS2     | -0.067733333 | -0.006566667 | -0.054333333 | -0.1985      | 0.027        |
| RCADH5    | -0.147366667 | 0.134766667  | -0.136233333 | -0.1413      | -0.016966667 |
| ORC4L     | -0.022233333 | 0.079466667  | 0.048666667  | -0.051366667 | 0.155966667  |
| TMEM118   | -0.2519      | 0.0072       | 0.0756       | -0.2888      | 0.080866667  |
| PSEN2     | -0.0065      | -0.0987      | -0.045933333 | -0.0746      | -0.0838      |
| MRPL46    | 0.328733333  | 0.092466667  | -0.1191      | 0.2035       | 0.0647       |
| MRPL13    | -0.038466667 | 0.013        | 0.082133333  | 0.029566667  | 0.0441       |
| DMC1      | -0.2335      | 0.648933333  | -0.345266667 | -0.192633333 | 0.088066667  |
| WDR92     | -0.0025      | 0.026866667  | 0.0377       | -0.061666667 | 0.0028       |
| LOC728811 | -0.199766667 | 8.00E-04     | -0.077066667 | -0.165433333 | -0.037866667 |
| EHMT2     | -0.024733333 | -0.0959      | 0.065233333  | -0.056533333 | -0.147633333 |
| NDRG2     | -0.0661      | -0.199833333 | 0.078033333  | -0.1861      | -0.0157      |
| ACTR5     | 0.228766667  | 0.109366667  | -0.095766667 | -2.00E-04    | 0.128766667  |
| SLC41A2   | -0.0197      | 0.059233333  | -0.190933333 | -0.0144      | -0.060433333 |
| JARID2    | -0.040033333 | 0.047833333  | 0.002666667  | -0.022033333 | 0.0074       |
| C10orf104 | -0.081166667 | -0.156       | -0.053766667 | -0.147866667 | -0.044566667 |
| UBE2N     | 0.0718       | 0.109933333  | 0.063533333  | -0.027433333 | 0.125966667  |
| MRPL42    | -0.035933333 | 0.097433333  | -0.001233333 | -0.054533333 | 0.0384       |
| TM9SF2    | -0.095633333 | -0.192633333 | -0.060333333 | -0.195933333 | -0.131833333 |
| THG1L     | -0.006433333 | 0.080833333  | -0.066066667 | 0.006666667  | 0.009866667  |
| PUM1      | 0.008133333  | -0.0286      | 0.096466667  | 0.062266667  | -0.1075      |
| EPS15L1   | 0.035        | 0.153033333  | 0.002566667  | 0.113533333  | -0.089866667 |
| MPP5      | 0.196366667  | 0.064066667  | -0.097       | 0.170966667  | 0.0053       |
| SNX1      | 0.1556       | 0.047166667  | -0.058633333 | 0.104133333  | 0.0246       |
| URB1      | 0.089033333  | 0.095933333  | 0.040233333  | 0.077666667  | 0.0048       |
| LOC642946 | -0.004533333 | 0.327133333  | -0.2036      | 0.024133333  | 0.101633333  |
| CALHM2    | -0.254033333 | 0.031133333  | 0.1795       | -0.115666667 | -0.0221      |
| PPARBP    | 0.0184       | 0.028666667  | 0.014766667  | 0.0281       | 0.0298       |
| RBMS2     | 0.312433333  | 0.159733333  | 0.067133333  | 0.343266667  | 0.065133333  |
| PEBP1     | -0.269866667 | -0.028633333 | 0.0816       | -0.1426      | -0.052633333 |
| DDX49     | 0.2604       | 0.039566667  | -0.1679      | 0.120033333  | -0.045033333 |
| PRPSAP1   | -0.272666667 | -0.1609      | -0.0484      | -0.269       | -0.1364      |

|               |              |              |              |              |              |
|---------------|--------------|--------------|--------------|--------------|--------------|
| OSTC          | -0.222766667 | 0.039866667  | 0.058166667  | -0.236433333 | 0.0581       |
| TFPI2         | 0.319766667  | 0.1552       | 0.069033333  | 0.389966667  | 0.124966667  |
| SFRS1         | 0.075966667  | 0.275266667  | 0.0274       | 0.096066667  | 0.101066667  |
| ANKRD52       | 0.114566667  | 0.012333333  | 0.084        | 0.1228       | -0.070333333 |
| TUBA1B        | 0.177166667  | 0.159533333  | -0.053066667 | 0.037166667  | 0.1147       |
| LOC401433     | 0.022666667  | 0.037333333  | 0.0551       | 0.058233333  | -0.065133333 |
| LOC647389     | -0.1366      | 0.5771       | -0.173166667 | -0.126233333 | 0.153233333  |
| C9orf46       | -0.006366667 | -0.043766667 | -0.2084      | 0.0289       | -0.014533333 |
| UCHL1         | 0.002333333  | -0.016166667 | 0.028433333  | -0.0433      | -0.017466667 |
| ZNF609        | 0.012066667  | 0.023066667  | 0.244666667  | 0.084333333  | -0.0007      |
| CLASP2        | 0.036433333  | 0.162633333  | -0.0477      | 0.0288       | 0.0579       |
| COMMD8        | -0.137366667 | 0.0037       | -0.160233333 | -0.236166667 | -0.0318      |
| FAM126B       | 0.095266667  | -0.010133333 | -0.115733333 | 0.048033333  | -0.0163      |
| ZNF280B       | 0.0693       | 0.0085       | -0.0148      | -0.005666667 | -0.046633333 |
| LOC440733     | -0.138133333 | 0.104266667  | -0.102466667 | -0.0459      | -0.045766667 |
| ORC1L         | 0.347133333  | 0.068433333  | -0.1331      | 0.119333333  | 0.009        |
| TYW3          | 0.038133333  | 0.068933333  | 0.2981       | 0.0398       | 0.242433333  |
| LOC642732     | -0.0043      | -0.007566667 | -0.0624      | 0.073133333  | -0.150233333 |
| LOC642513     | 0.130533333  | 0.052566667  | -0.0673      | 0.0531       | 0.013133333  |
| VRK2          | 0.1654       | 0.177066667  | -0.1774      | -0.055966667 | -0.0092      |
| EMR1          | -0.165233333 | 0.052        | 0.301766667  | -0.0733      | 0.1219       |
| C1RL          | -0.2768      | -0.033033333 | 0.112366667  | -0.155166667 | -0.062966667 |
| EFNA1         | -0.417133333 | -0.315733333 | 0.0305       | -0.1611      | -0.352566667 |
| ELMOD2        | 0.060966667  | -0.102966667 | 0.023        | -0.0464      | 0.0413       |
| TRAF2         | 0.315        | 0.0165       | 0.065066667  | 0.207866667  | 0.073        |
| LOC728831     | -0.6338      | 0.275233333  | -0.600866667 | -0.578       | 0.169866667  |
| HCN4          | -0.15        | -0.0316      | -0.122666667 | -0.2749      | -0.113       |
| TMEM167A      | -0.046366667 | 0.132466667  | -0.021966667 | 0.066633333  | 0.1224       |
| PARG          | 0.071466667  | 0.025633333  | -0.01        | 0.150266667  | 0.015966667  |
| AMMECR1       | 0.0473       | -0.081033333 | -0.2249      | -0.025333333 | -0.034266667 |
| PRR5          | 0.219566667  | 0.033433333  | 0.084333333  | 0.1222       | 0.0616       |
| CSE1L         | 0.487233333  | 0.299966667  | -0.2422      | 0.389133333  | 0.124666667  |
| LOC442609     | -0.061033333 | 0.1581       | 0.028533333  | 0.035633333  | -0.022066667 |
| C3orf50       | -0.210166667 | 0.412566667  | -0.0573      | -0.072133333 | 0.158066667  |
| DKFZp667M2411 | -0.0252      | -0.015133333 | 0.1213       | 0.060033333  | 0.103733333  |
| SLCO4A1       | 0.317466667  | 0.1513       | 0.0472       | 0.006266667  | 0.2076       |
| C6orf153      | 0.0473       | 0.0169       | 0.064766667  | 0.074133333  | 0.014033333  |
| WDR75         | 0.1282       | 0.135366667  | -0.029266667 | 0.1424       | 0.089133333  |
| LOC642741     | -0.277833333 | -0.1665      | 0.192966667  | -0.175966667 | -0.1676      |
| FLJ10213      | -0.045133333 | 0.043166667  | 0.170766667  | -0.033133333 | -0.018733333 |
| ZNF430        | -0.181366667 | 0.4184       | -0.148066667 | -0.169766667 | 0.0225       |
| MGST3         | -0.234966667 | -0.094233333 | 0.1679       | -0.174233333 | -0.097166667 |
| PYCR1         | 0.195433333  | 0.0417       | 0.028133333  | 0.105333333  | 0.020966667  |
| RACGAP1       | 0.1504       | 0.1165       | -0.050266667 | 0.105366667  | -0.079733333 |
| PELP1         | 0.2513       | 0.015733333  | 0.051233333  | 0.16         | -0.032566667 |
| FBXL18        | 0.031833333  | 0.0797       | 0.084266667  | 0.000833333  | 0.1101       |
| FAM134A       | -0.018833333 | -0.075433333 | 0.037833333  | -0.012933333 | -0.135466667 |

|              |              |              |              |              |              |
|--------------|--------------|--------------|--------------|--------------|--------------|
| LOC100133328 | -0.088833333 | 0.080433333  | -0.040633333 | -0.006166667 | -0.0938      |
| MTRF1L       | -0.030733333 | -0.0112      | -0.013666667 | -0.083466667 | -0.068966667 |
| LOC441241    | 0.275966667  | 0.030633333  | -0.109533333 | 0.179266667  | -0.031566667 |
| CCT4         | 0.023066667  | 0.195933333  | 0.018166667  | 0.010933333  | 0.083666667  |
| MAGEL2       | 0.041733333  | -0.013733333 | 0.015566667  | 0.0161       | -0.0051      |
| ECD          | 0.0851       | -0.0073      | 0.0466       | 0.054633333  | -0.0682      |
| SCAMP4       | -0.0099      | 0.1574       | -0.055666667 | -0.056333333 | 0.013833333  |
| LOC650321    | -0.1539      | 0.092333333  | -0.164833333 | -0.222733333 | 0.125166667  |
| BCKDK        | -0.0306      | 0.0097       | 0.188833333  | -0.084866667 | 0.1031       |
| RAP1GDS1     | 0.116733333  | 0.1294       | 0.0016       | 0.070866667  | 0.0265       |
| PTPN20A      | -0.0065      | 0.130166667  | 0.0143       | 0.017533333  | 0.0103       |
| LOC100130750 | -0.3586      | 0.093966667  | -0.221933333 | -0.2234      | 0.033766667  |
| ENHO         | -0.023       | 0.1808       | -0.144066667 | -0.004366667 | -0.0412      |
| LOC390956    | -0.1264      | 0.203433333  | -0.349166667 | -0.298366667 | 0.102866667  |
| LOC92755     | 0.3302       | 0.0312       | 0.190733333  | 0.161933333  | 0.0318       |
| ZNF93        | -0.149766667 | 0.689        | -0.261233333 | -0.057166667 | 0.3158       |
| IKBKB        | -0.057666667 | 0.003266667  | -0.130933333 | -0.157       | -0.081933333 |
| LOC441246    | 0.1359       | 0.062733333  | 0.112866667  | 0.1549       | 0.101033333  |
| RPL11        | 0.0234       | -0.038966667 | 0.0775       | -0.0593      | -0.0331      |
| SPATA22      | -0.0059      | 0.099666667  | -0.036833333 | -0.026266667 | 0.028066667  |
| LNX2         | 0.114166667  | -0.2809      | 0.008333333  | -0.031633333 | 0.0115       |
| B2M          | 0.015433333  | -0.196766667 | -0.0908      | 0.000766667  | -0.202666667 |
| LOC134466    | 0.0623       | 0.041966667  | 0.060766667  | 0.027166667  | 0.066933333  |
| RBM4B        | 0.0448       | 0.0148       | -0.079933333 | 0.004233333  | -0.0202      |
| NANS         | 0.131466667  | 0.046166667  | 0.031833333  | -0.029133333 | 0.0695       |
| ASB8         | -0.063566667 | -0.107       | -0.0261      | -0.136933333 | -0.052       |
| EXOC2        | -0.086433333 | -0.0113      | -0.011166667 | -0.177466667 | -0.1038      |
| MTX2         | -0.212266667 | 0.0886       | 0.0157       | -0.069833333 | -0.036633333 |
| TCEA1        | 0.037333333  | -0.028466667 | -0.1677      | -0.085233333 | -0.108233333 |
| DHRX         | 0.010666667  | 0.034633333  | -0.019466667 | -0.109433333 | -0.005466667 |
| TH1L         | 0.163333333  | 0.014333333  | 0.133166667  | 0.088466667  | 0.086133333  |
| JUB          | 0.2136       | 0.099166667  | -0.181333333 | 0.323266667  | -0.034066667 |
| SPG7         | -0.048933333 | -0.0407      | 0.167566667  | -0.0827      | 0.003533333  |
| RPS2         | -0.0929      | 0.035066667  | -0.045533333 | -0.098666667 | -0.0665      |
| C17orf89     | 0.149333333  | 0.100933333  | -0.122866667 | 0.044133333  | 0.0224       |
| FLJ44054     | -0.014533333 | -0.048433333 | 0.1621       | -0.031366667 | 0.048        |
| SRI          | -0.057433333 | 0.023233333  | 0.216733333  | -0.124866667 | 0.026033333  |
| MCM5         | 0.2636       | -0.049333333 | 0.0044       | 0.141        | -0.054233333 |
| ZNF295       | -0.0663      | -0.1454      | -0.062733333 | -0.0364      | -0.148266667 |
| VTA1         | 0.0959       | 0.0511       | -0.014266667 | -0.036833333 | 0.043633333  |
| C19orf62     | -0.008566667 | -0.164233333 | 0.080533333  | -0.053       | -0.04        |
| LOC652672    | -0.008833333 | -0.135233333 | 0.1313       | 0.094033333  | -0.0846      |
| AHCYL2       | -0.0638      | 0.003166667  | 0.042666667  | -0.015833333 | -0.039633333 |
| ELP3         | -0.0494      | 0.015466667  | -0.060166667 | -0.0777      | 0.053833333  |
| ZNF10        | 0.0281       | -0.0877      | -0.122966667 | -0.2101      | -5.00E-04    |
| TMUB2        | -0.053333333 | -0.1204      | -0.049833333 | -0.054533333 | -0.190633333 |
| LOC654123    | -0.330133333 | 0.2354       | -0.1356      | -0.1049      | 0.0333       |

|              |              |              |              |              |              |
|--------------|--------------|--------------|--------------|--------------|--------------|
| SLC46A1      | 0.0917       | -0.150166667 | 0.072733333  | -0.000266667 | 0.138433333  |
| TBC1D19      | -0.353833333 | -0.074       | 0.111233333  | -0.4248      | -0.1227      |
| LOC100132909 | -0.1101      | 0.012866667  | 0.075466667  | 0.088233333  | -0.096566667 |
| OR11H1       | -0.0426      | -0.017333333 | 0.1185       | -0.000233333 | -0.019566667 |
| IFIT1        | -0.4073      | 0.139566667  | 0.302266667  | -0.165333333 | 0.066833333  |
| LOC645296    | 0.0282       | -0.020666667 | 0.002566667  | 0.1853       | -0.0281      |
| QDPR         | 0.044733333  | -0.058433333 | -0.026866667 | -0.103166667 | -0.0662      |
| CDC42BPB     | 0.0982       | -0.0724      | 0.0412       | -0.0129      | -0.087833333 |
| FLJ20718     | 0.0876       | 0.052133333  | -0.0699      | -0.125366667 | 0.105566667  |
| INPP5A       | 0.257533333  | 0.1114       | -0.216733333 | 0.091466667  | 0.011033333  |
| CORO7        | 0.1399       | -0.201833333 | 0.001633333  | -0.1303      | -0.0808      |
| PIGQ         | -0.194       | -0.080666667 | 0.0001       | -0.220933333 | -0.025266667 |
| LOC100132292 | 0.137033333  | 0.218933333  | -0.148166667 | 0.107433333  | 0.0459       |
| HDAC8        | -0.2443      | 0.0127       | 0.114866667  | -0.335766667 | 0.0903       |
| C6orf120     | -0.121066667 | -0.0535      | -0.103566667 | -0.0115      | -0.190566667 |
| LOC652324    | 0.1729       | 0.0203       | -0.006966667 | -0.0222      | 0.029133333  |
| FDPS         | 0.072966667  | 0.0109       | 0.138766667  | 0.045        | 0.077733333  |
| GLO1         | 0.194933333  | -0.122533333 | 0.0339       | 0.0817       | -0.1247      |
| LOC729301    | -0.02        | 0.1105       | -0.053266667 | -0.005833333 | 0.042266667  |
| MEA1         | 0.0804       | 0.165633333  | 0.0899       | 0.1032       | 0.1023       |
| LRRC29       | -0.2118      | -0.126733333 | 0.068833333  | -0.223233333 | -0.112733333 |
| SAMM50       | 0.021633333  | -0.0053      | 0.033166667  | 0.0055       | -0.013966667 |
| CD320        | 0.2231       | 0.010533333  | 0.0174       | 0.209133333  | 0.064133333  |
| HIST1H1A     | -0.031966667 | 0.1061       | 0.019733333  | -0.0519      | 0.1002       |
| C1orf85      | -0.2771      | -0.0744      | 0.1185       | -0.2696      | -0.0922      |
| LOC100133163 | 0.030033333  | 0.097733333  | 0.140833333  | 0.058833333  | 0.059966667  |
| FAM76B       | 0.003        | -0.3219      | -0.018133333 | -0.038333333 | -0.107666667 |
| DOCK7        | -0.038933333 | -0.017633333 | 0.081633333  | -0.141566667 | -0.0081      |
| PPP2R3A      | 0.103833333  | 0.251766667  | 0.055733333  | 0.1729       | 0.102533333  |
| ANKRD36B     | 0.0831       | -0.043233333 | 0.163333333  | -0.015833333 | 0.068866667  |
| PDZRN3       | 0.079033333  | -0.005366667 | -0.0391      | -0.095466667 | 0.102533333  |
| SLC45A2      | 0.057533333  | 0.0325       | 0.0099       | 0.022533333  | -0.038366667 |
| HRB          | 0.1256       | 0.059433333  | 0.036866667  | 0.143433333  | -0.027066667 |
| LOC100132369 | 0.193666667  | -0.130666667 | -0.034233333 | 0.165133333  | -0.1537      |
| DOM3Z        | -0.032633333 | -0.114366667 | -0.052666667 | -0.135933333 | -0.162166667 |
| LOC646766    | 0.069066667  | -0.005233333 | 0.179633333  | 0.0989       | -0.0208      |
| TSTD2        | -0.066833333 | 0.065        | -0.0529      | -0.070466667 | 0.0805       |
| MMS19L       | -0.102       | 0.140866667  | 0.047066667  | -0.1182      | -0.0069      |
| SLC7A8       | -0.0098      | 0.018633333  | 0.0057       | -0.041633333 | -0.007933333 |
| PDIK1L       | 0.163966667  | 0.110033333  | -0.266       | 0.1295       | -0.034933333 |
| CASC3        | 0.2119       | -0.127333333 | 0.067433333  | 0.1615       | -0.067133333 |
| UNC84B       | 0.126466667  | -0.070933333 | 0.1085       | -0.003966667 | 0.019633333  |
| USP30        | -0.1483      | 0.131833333  | 0.100633333  | -0.0371      | 0.0393       |
| DSTYK        | -0.0947      | -0.088566667 | 0.032466667  | -0.007166667 | -0.126966667 |
| SF3B3        | -0.019933333 | 0.104366667  | 0.136833333  | 0.064833333  | 0.078166667  |
| RPS18        | -0.027933333 | -0.1767      | 0.1476       | -0.0324      | -0.0967      |
| PHB          | 0.2952       | 0.1351       | -0.1464      | 0.2349       | 0.029633333  |

|               |              |              |              |              |              |
|---------------|--------------|--------------|--------------|--------------|--------------|
| CADPS         | 0.13         | 0.040333333  | -0.053166667 | 0.0433       | 0.017666667  |
| C12orf4       | 0.0962       | -0.0154      | -0.054166667 | 0.008266667  | -0.048833333 |
| LRPAP1        | 0.073733333  | -0.0608      | -0.149233333 | -0.030266667 | -0.059866667 |
| LOC388955     | 0.115566667  | 0.113133333  | -0.118366667 | 0.0155       | -0.012133333 |
| LRRCS7        | 0.020866667  | 0.074866667  | -0.0572      | 0.0399       | -0.027366667 |
| LOC441073     | -0.454933333 | -0.050466667 | -0.240766667 | -0.395633333 | -0.116233333 |
| LOC100133298  | -0.238133333 | 0.390733333  | -0.148133333 | -0.104766667 | 0.0768       |
| BCYRN1        | -0.0725      | 0.189933333  | 0.001566667  | 0.0894       | -0.0841      |
| KIAA1191      | -0.072       | 0.006866667  | -0.035666667 | -0.065866667 | -0.122666667 |
| LIN52         | 0.015066667  | 0.2636       | -0.064866667 | -0.0024      | 0.120366667  |
| H2AFV         | 0.222466667  | 0.131333333  | -0.066833333 | 0.194066667  | 0.063966667  |
| LOC100130168  | -0.0278      | 0.499733333  | -0.139966667 | -0.014133333 | 0.098866667  |
| SNHG4         | 0.1754       | -0.0927      | -0.071433333 | 0.012766667  | 0.072166667  |
| LOC205251     | 0.0019       | 0.103566667  | -0.021566667 | 0.0353       | -0.000233333 |
| SEC24B        | 0.088433333  | 0.112333333  | 0.1319       | 0.068533333  | 0.1936       |
| LOC100128816  | 0.081466667  | 0.0549       | -0.069066667 | 0.0356       | 0.066        |
| LOC728517     | 0.023133333  | 0.050933333  | -0.060566667 | -0.047166667 | 0.017166667  |
| PDE7A         | 0.011233333  | 0.034933333  | 0.0088       | 0.0465       | -0.185366667 |
| FBXO38        | -0.254933333 | 0.0586       | 0.085633333  | -0.1106      | -0.0061      |
| KIAA0492      | -0.1147      | 0.339166667  | -0.123866667 | -0.196733333 | 0.2015       |
| LOC285943     | 0.0896       | 0.1451       | -0.1666      | -0.011633333 | -0.023966667 |
| NCSTN         | -0.136666667 | -0.1742      | 0.206866667  | -0.2169      | -0.053133333 |
| TWISTNB       | 0.2367       | 0.143533333  | -0.0601      | 0.103733333  | -0.025133333 |
| LOC202227     | -0.2377      | 0.176233333  | -0.3375      | -0.134966667 | 0.043833333  |
| LOC647302     | 0.193433333  | 0.0932       | -0.0339      | 0.0837       | 0.019266667  |
| RPS10         | 0.102266667  | 0.011        | -0.019433333 | 0.009633333  | 0.046466667  |
| SNX22         | -0.079       | -0.0487      | 0.097966667  | 0.0392       | -0.235466667 |
| LOC389386     | 0.173833333  | -0.130533333 | -0.022433333 | 0.047833333  | -0.0497      |
| ALG8          | -0.008933333 | 0.0969       | 0.3104       | 0.081933333  | 0.103833333  |
| HIST1H3E      | -0.038233333 | -0.005033333 | 0.018833333  | 0.027466667  | 0.034533333  |
| THOC4         | 0.4475       | 0.069366667  | -0.197       | 0.270633333  | 0.131        |
| SLC23A2       | 0.043        | -0.103066667 | -0.015333333 | -0.002866667 | -0.0986      |
| HSDL2         | -0.116833333 | 0.0725       | -0.030233333 | -0.046833333 | -0.0472      |
| ZNF222        | -0.079       | 0.0521       | -0.106666667 | -0.009333333 | -0.0296      |
| HSD17B10      | 0.038066667  | -0.009566667 | -0.015933333 | -0.094266667 | -0.070633333 |
| LOC646817     | 0.050366667  | 0.0392       | 0.023833333  | 0.198933333  | 0.067066667  |
| LOC339483     | 0.041966667  | -0.092466667 | 0.0243       | -0.0373      | -0.0203      |
| TCTN3         | -0.096       | -0.0277      | 0.073466667  | -0.237066667 | -0.108366667 |
| CHEK2         | 0.167433333  | 0.078366667  | 0.017233333  | 0.098733333  | 0.006466667  |
| DNAJC25-GNG10 | 0.009933333  | -0.041666667 | -0.075733333 | -0.0487      | -0.0243      |
| TSPO          | -0.083933333 | -0.174566667 | 0.187733333  | 0.020633333  | -0.125066667 |
| TAF1B         | -0.043566667 | 0.015433333  | 0.209633333  | 0.013733333  | -0.032233333 |
| BAT2L         | -0.025333333 | -0.049333333 | 0.095033333  | 0.0244       | -0.038733333 |
| MRPL42P5      | 0.024033333  | 0.0432       | 0.0621       | 0.040133333  | 0.0641       |
| LOC732419     | 0.199566667  | 0.208066667  | -0.303266667 | 0.091866667  | 0.042766667  |
| FRMD3         | -0.0026      | -0.152433333 | 0.215833333  | 0.009433333  | 0.0376       |
| LOC727825     | -0.034333333 | -0.0933      | -0.0011      | -0.017766667 | -0.091933333 |

|              |              |              |              |              |              |
|--------------|--------------|--------------|--------------|--------------|--------------|
| SNORD95      | 0.049433333  | 0.001366667  | -0.0187      | 0.026233333  | 0.0234       |
| LOC100130556 | 0.081566667  | 0.0714       | -0.0468      | -0.068466667 | 0.123933333  |
| LOC654085    | -0.192       | 0.137033333  | -0.130833333 | -0.230733333 | 0.104866667  |
| PLA2G4B      | -0.178633333 | -0.173733333 | 0.033533333  | -0.255733333 | -0.0925      |
| ATF6B        | -0.061466667 | 0.029266667  | -0.019233333 | 0.031433333  | -0.1563      |
| TMEM66       | -0.12        | -0.0355      | 0.1486       | -0.123766667 | -0.0074      |
| PINX1        | 0.2493       | 0.078266667  | -0.068166667 | 0.263666667  | 0.023433333  |
| POLR3C       | 0.1789       | 0.014633333  | -0.0409      | 0.096        | -0.034866667 |
| NUDCD1       | 0.1857       | 0.049066667  | 0.1567       | 0.166466667  | 0.1446       |
| POU2F1       | 0.130666667  | 0.0496       | 0.0401       | -0.032733333 | -0.0245      |
| SPTLC1       | -0.2051      | 0.525        | -0.198833333 | -0.070366667 | -0.005966667 |
| OXA1L        | -0.003266667 | -0.0656      | 0.078733333  | 0.063066667  | -0.1491      |
| LOC100132391 | -0.093866667 | 0.6591       | 0.0059       | -0.0439      | 0.332        |
| NCOA3        | -0.192766667 | 0.003033333  | -0.0362      | -0.1407      | 0.054866667  |
| URM1         | -0.1274      | -0.039066667 | -0.022366667 | -0.149166667 | -0.033866667 |
| LOC643007    | -0.7002      | 0.008533333  | -0.385466667 | -0.6454      | 0.016366667  |
| PPP1CB       | -0.2011      | 0.0172       | 0.126333333  | -0.0264      | -0.186433333 |
| ZNF182       | 0.019033333  | -0.063233333 | -0.0514      | 0.0927       | -0.206       |
| EEF2         | -0.0852      | -0.0907      | 0.070566667  | 0.087466667  | -0.146366667 |
| C2orf56      | 0.0415       | 0.099533333  | 0.0108       | 0.000133333  | 0.068566667  |
| TNNT1        | -0.0954      | -0.098533333 | 0.1953       | -0.0857      | -0.148833333 |
| FAM168B      | 0.374266667  | 0.066933333  | -0.060933333 | 0.364233333  | -0.128333333 |
| SLC16A6      | 0.016366667  | -0.0259      | -0.003733333 | -0.022833333 | 0.016933333  |
| WRN          | 0.053933333  | 0.007066667  | 0.045466667  | 0.0186       | -0.0458      |
| JPH2         | 0.036933333  | -0.1145      | -0.0375      | -0.031633333 | -0.1471      |
| LOC100133697 | 0.0606       | 0.259633333  | 0.0039       | 0.064933333  | 0.1154       |
| LOC100130758 | 0.013733333  | 0.1041       | 0.045        | -0.0224      | 0.1464       |
| LOC643534    | -0.493866667 | 0.186233333  | -0.5446      | -0.582066667 | 0.093866667  |
| ZNF433       | -0.1738      | 0.001066667  | -0.050966667 | -0.182533333 | -0.0895      |
| ANK2         | -0.159133333 | 0.030533333  | 0.0135       | -0.113133333 | -0.0567      |
| MOCS1        | 0.016933333  | -0.007833333 | -0.074566667 | -0.18        | 0.084266667  |
| NDUFS7       | -0.167133333 | -0.0265      | 0.035633333  | -0.1484      | 0.022066667  |
| LOC100130071 | 0.108233333  | -0.0074      | 0.1003       | 0.1385       | -0.077       |
| TPM2         | -0.080633333 | -0.149266667 | 0.252733333  | -0.119866667 | -0.0185      |
| PLXDC2       | -0.012133333 | -0.045233333 | 0.051333333  | -0.115966667 | -0.021233333 |
| RCP9         | 0.042633333  | 0.001733333  | 0.053766667  | 0.029333333  | -0.096166667 |
| SNORA62      | 0.482666667  | 0.198        | -0.336133333 | 0.2789       | 0.033966667  |
| LOC100128056 | 0.072866667  | -0.3124      | 0.1907       | 0.1571       | -0.2396      |
| GPSM1        | -0.071633333 | -0.061666667 | 0.217733333  | -0.0691      | -0.013666667 |
| SASS6        | 0.143566667  | -0.0956      | 0.0355       | -0.061833333 | 0.065133333  |
| ABHD14A      | -0.098333333 | -0.150133333 | 0.089866667  | -0.144366667 | -0.0689      |
| MED1         | 0.081733333  | 0.140633333  | -0.0111      | 0.041233333  | 0.014166667  |
| C20orf30     | -0.217133333 | -0.072166667 | 0.164833333  | -0.317833333 | 0.137066667  |
| HADH2        | 0.0457       | -0.0869      | -0.026733333 | -0.030166667 | 0.025633333  |
| NQO2         | -0.168966667 | -0.122966667 | 0.032933333  | -0.226566667 | -0.0328      |
| LOC100134261 | 0.213933333  | 0.008        | 0.065133333  | 0.1161       | 0.063833333  |
| SUV420H1     | 0.0539       | 0.2807       | -0.0942      | 0.157633333  | -0.002066667 |

|              |              |              |              |              |              |
|--------------|--------------|--------------|--------------|--------------|--------------|
| CROT         | -0.2381      | 0.077266667  | -0.071       | -0.295166667 | -0.044766667 |
| CTPS2        | -0.227566667 | 0.016466667  | 0.118366667  | -0.186466667 | -0.057533333 |
| NR2F6        | 0.093133333  | 0.049733333  | 0.2072       | 0.1282       | 0.021033333  |
| AGPAT2       | 0.158533333  | -0.044766667 | -0.105533333 | 0.0979       | -0.0678      |
| PILRB        | 0.063633333  | -0.081733333 | -0.037833333 | -0.004666667 | -0.142233333 |
| LOC730005    | 0.020633333  | 0.106966667  | -0.0826      | -0.036533333 | 0.022233333  |
| SLFN11       | 0.3146       | -0.0558      | 0.168866667  | 0.082733333  | 0.088        |
| VPS37B       | 0.063333333  | -0.0289      | 0.014        | -0.0132      | -0.1041      |
| LOC648638    | -0.0618      | 0.1339       | -0.077       | -0.007433333 | 0.062266667  |
| ARHGEF10     | 0.1948       | 0.064366667  | -0.004466667 | -0.044766667 | 0.037733333  |
| POLDIP3      | 0.112433333  | 0.055133333  | -0.008966667 | 0.0811       | -0.0786      |
| RNPC2        | -0.031433333 | 0.0592       | 0.0466       | 0.019466667  | -0.0272      |
| RBM10        | -0.005866667 | 0.099033333  | 0.191066667  | 0.170633333  | -0.028266667 |
| ZNF326       | 0.057        | 0.018033333  | 0.126666667  | 0.1661       | -0.027333333 |
| TIPIN        | 0.546666667  | 0.2259       | -0.201733333 | 0.406366667  | 0.0591       |
| POFUT1       | 0.010366667  | 0.5437       | -0.004666667 | 0.042        | 0.148566667  |
| BSCL2        | -0.398633333 | -0.206133333 | 0.260166667  | -0.377433333 | 0.024433333  |
| LOC646034    | 0.0594       | 0.136633333  | 0.037066667  | 0.0347       | 0.002433333  |
| ZNF304       | 0.0971       | -0.082466667 | 0.135166667  | 0.101533333  | -0.0198      |
| ARHGAP4      | -0.067833333 | -0.009533333 | 0.092        | -0.1288      | 0.058866667  |
| SFRS2IP      | -0.2769      | 0.018033333  | 0.086666667  | -0.2006      | -0.144133333 |
| LOC652545    | 0.176233333  | -0.0142      | 0.150633333  | 0.1827       | -0.0132      |
| SMAD4        | 0.092966667  | -0.113433333 | 0.116466667  | -0.0204      | 0.113066667  |
| WDR21A       | 0.058066667  | -0.039966667 | -0.060366667 | 0.081266667  | -0.108233333 |
| ULK1         | -0.418166667 | -0.377866667 | 0.015233333  | -0.469466667 | -0.248033333 |
| ARID3A       | 0.085866667  | -0.111966667 | 0.277433333  | 0.140566667  | -0.072433333 |
| RDBP         | 0.118266667  | 0.032566667  | 0.0538       | 0.065333333  | 0.027633333  |
| LOC646942    | -0.328466667 | 0.070566667  | -0.208966667 | -0.323366667 | 0.032166667  |
| ATG10        | -0.296866667 | 0.193933333  | -0.0711      | -0.376033333 | 0.061133333  |
| C20orf27     | 0.0498       | 0.1628       | -0.0826      | -0.0156      | 0.1339       |
| LOC100132585 | -0.182933333 | 0.8469       | -0.081533333 | -0.0594      | 0.3769       |
| C9orf150     | -0.215566667 | -0.0948      | -0.0816      | -0.194666667 | -0.119366667 |
| RUFY2        | -0.000866667 | -0.0399      | 0.119833333  | -0.0181      | 0.017233333  |
| CRLS1        | 0.128466667  | 0.053633333  | 0.0156       | 0.046033333  | 0.1104       |
| HOXD4        | 0.0359       | 0.027        | 0.079966667  | 0.184633333  | -0.100166667 |
| MSH6         | 0.312766667  | 0.0721       | -0.1217      | 0.114466667  | 0.0511       |
| GAS2L3       | 0.085833333  | 0.063266667  | 0.1931       | 0.046933333  | 0.1296       |
| LOC100133469 | 0.238266667  | 0.097733333  | -0.0441      | 0.123566667  | 0.0373       |
| MFSD6        | -0.130433333 | -0.194733333 | -0.010766667 | -0.256866667 | -0.086666667 |
| FAM165B      | -0.015933333 | -0.023       | -0.071566667 | -0.1581      | 0.055866667  |
| C20orf194    | -0.035466667 | -0.0824      | 0.082133333  | -0.130433333 | 0.0396       |
| ID2B         | 0.127833333  | -0.0744      | -0.1316      | 0.073433333  | -0.167533333 |
| ELF2         | -0.074266667 | 0.0274       | 0.089266667  | -0.017833333 | -0.122166667 |
| PTP4A3       | 0.0013       | 0.0657       | -0.069566667 | -0.1143      | -0.041666667 |
| LENG1        | 0.144833333  | -0.050533333 | 0.026833333  | 0.065133333  | 0.0268       |
| WDSOF1       | 0.0905       | 0.434566667  | -0.1286      | 0.195033333  | 0.092933333  |
| SFRS2        | 0.257133333  | 0.1007       | 0.061033333  | 0.276233333  | -0.0023      |



|              |              |              |              |              |              |
|--------------|--------------|--------------|--------------|--------------|--------------|
| FAM193A      | 0.003966667  | 0.054566667  | -0.033133333 | -0.0975      | -0.002733333 |
| LOC100129708 | 0.043866667  | 0.0087       | -0.1212      | 0.0693       | -0.110866667 |
| CLRN1        | -0.074266667 | -0.016733333 | 0.0904       | 0.0707       | -0.129966667 |
| KIDINS220    | 0.020733333  | -0.071033333 | -0.031166667 | -0.0325      | -0.0757      |
| WDR24        | -0.0514      | -0.0306      | 0.038333333  | -0.1418      | -0.044966667 |
| SENP7        | -0.0808      | -0.104       | 0.079533333  | -0.147933333 | -0.120566667 |
| NUP205       | 0.1829       | 0.1111       | -0.045233333 | 0.098433333  | -0.046633333 |
| LOC401238    | 0.438266667  | 0.060466667  | 0.135366667  | 0.279366667  | 0.0865       |
| PAIP1        | -0.090966667 | 0.023166667  | -0.0079      | -0.006266667 | -0.0031      |
| DYNC2H1      | -0.136       | -0.022066667 | 0.069        | -0.125266667 | -0.207533333 |
| NBPF8        | -0.2227      | 0.001533333  | 0.257733333  | -0.3234      | -0.071266667 |
| ANO8         | -0.210666667 | -0.113366667 | 0.150066667  | -0.182033333 | -0.154566667 |
| AP4M1        | 0.0465       | -0.002733333 | 0.019533333  | -0.046866667 | -0.008633333 |
| LOC100129716 | -0.047933333 | 0.0447       | -0.054966667 | 0.056966667  | -0.085033333 |
| MRPS36       | -0.1332      | -0.014066667 | 0.005966667  | -0.0941      | 0.013733333  |
| LOC653324    | -0.202633333 | 0.1473       | -0.151066667 | -0.1376      | 0.022833333  |
| SDHA         | -0.046933333 | 0.0158       | 0.029        | -0.024266667 | -0.158766667 |
| ZDHHC6       | 0.041333333  | 0.189066667  | 0.009966667  | 0.074933333  | -0.012233333 |
| ANXA2P2      | -0.007833333 | -0.080566667 | 0.057333333  | 0.005833333  | -0.099266667 |
| FANCI        | 0.389666667  | 0.148633333  | -0.087166667 | 0.1758       | -0.008866667 |
| MAN2B1       | 0.0363       | -0.068       | 0.005066667  | -0.013333333 | -0.040233333 |
| TSPYL1       | -0.046433333 | -0.058166667 | 0.0174       | -0.0377      | -0.008966667 |
| LRFN4        | 0.1705       | -0.048033333 | -0.102233333 | 0.139233333  | -0.1483      |
| RPS6         | 0.041933333  | 0.0065       | -0.085566667 | 0.008        | 0.039533333  |
| VPS4B        | 0.0779       | -0.2157      | -0.0363      | -0.023233333 | -0.1194      |
| LOC653080    | -0.1844      | -0.081733333 | 0.1232       | -0.245466667 | -0.031733333 |
| SPNS1        | -0.2207      | 0.080433333  | -0.086266667 | -0.089866667 | -0.0226      |
| ABHD8        | -0.551366667 | -0.095233333 | 0.176333333  | -0.468566667 | -0.0522      |
| ARFGEF1      | -0.054       | 0.012433333  | -0.015766667 | -0.1133      | 0.050033333  |
| CHST3        | 0.123066667  | -0.031833333 | -0.0774      | 0.057        | -0.049366667 |
| DDX59        | 0.001533333  | 0.2357       | -0.2149      | -0.024166667 | 0.076533333  |
| DDX51        | -0.030333333 | 0.708666667  | -0.0662      | 0.055766667  | 0.215933333  |
| MRPL55       | 0.128133333  | -0.021466667 | 0.105266667  | -0.0049      | 0.028733333  |
| RPS4Y2       | -0.030733333 | -0.0145      | 0.128866667  | -0.052566667 | 0.088333333  |
| MLEC         | 0.1059       | -0.011       | 0.107066667  | -0.073666667 | -0.012866667 |
| MAP3K7IP1    | -0.015033333 | -0.0041      | 0.088866667  | -0.0097      | -0.0509      |
| IER3IP1      | -0.061466667 | 0.042933333  | -0.016       | -0.0411      | 0.0747       |
| RPL27        | 0.0499       | -0.0268      | 0.008766667  | 0.019866667  | -0.005833333 |
| GGH          | -0.0279      | 0.185266667  | -0.141666667 | -0.077466667 | 0.056233333  |
| BTBD12       | 0.245233333  | 0.061666667  | -0.043966667 | 0.116333333  | 0.0437       |
| KIF23        | 0.3681       | 0.404633333  | -0.176333333 | 0.424166667  | -0.053066667 |
| ACBD6        | 0.017633333  | 0.156966667  | -0.050633333 | -0.067866667 | 0.004366667  |
| SMPDL3A      | -0.051733333 | -0.066733333 | 0.043833333  | -0.057666667 | -0.0372      |
| ANAPC7       | 0.255433333  | 0.1146       | -0.020966667 | 0.152333333  | 0.0525       |
| IQGAP3       | 0.2626       | 0.0236       | 0.045066667  | 0.161333333  | -0.143333333 |
| SAMD8        | -0.046733333 | 0.014566667  | -0.055233333 | 0.0296       | -0.077466667 |
| EME1         | 0.319333333  | -0.060733333 | -0.050133333 | 0.127466667  | -0.031766667 |

|              |              |              |              |              |              |
|--------------|--------------|--------------|--------------|--------------|--------------|
| ACAD10       | -0.2292      | -0.082133333 | 0.007766667  | -0.205       | -0.089733333 |
| TBC1D4       | 0.422533333  | 0.132833333  | -0.009566667 | 0.321933333  | 0.031366667  |
| LOC100130980 | 0.035766667  | -0.0288      | 0.060666667  | -0.001733333 | -0.027533333 |
| TMEM42       | -0.513033333 | -0.0768      | 0.044066667  | -0.310566667 | -0.133466667 |
| ANKRD6       | -0.158933333 | 0.105566667  | -0.113733333 | -0.050266667 | -0.0818      |
| TAZ          | 0.093733333  | -0.097966667 | -0.068333333 | -0.1286      | -0.123266667 |
| LOC100130476 | 0.035866667  | -0.070966667 | 0.009866667  | -0.036233333 | -0.042733333 |
| PCNA         | 0.334533333  | 0.132766667  | -0.046       | 0.148333333  | 0.075933333  |
| THEM2        | -0.302333333 | -0.048433333 | 0.2469       | -0.2127      | 0.0316       |
| GNL1         | -0.0324      | 0.076266667  | 0.0461       | -0.088433333 | -0.046466667 |
| LOC646350    | -0.2035      | 0.097166667  | -0.253733333 | -0.280533333 | 0.034366667  |
| C14orf28     | -0.056433333 | -0.032266667 | -0.004366667 | 0.0115       | 0.023033333  |
| LOC644584    | 0.3628       | -0.016333333 | -0.0025      | 0.071766667  | 0.113266667  |
| AFAP1L1      | 0.045466667  | 0.0233       | -0.113966667 | 0.049533333  | -0.022766667 |
| APBA2BP      | -0.114566667 | -0.090233333 | 0.1145       | -0.191266667 | -0.0458      |
| FAM8A1       | -0.2071      | -0.145733333 | 0.161533333  | -0.239866667 | 0.023866667  |
| LOC645351    | -0.213033333 | 0.078466667  | -0.0305      | -0.173533333 | 0.0764       |
| C2CD2        | 0.0011       | 0.0411       | 0.007566667  | -0.0461      | -0.049566667 |
| RFFL         | 0.085066667  | 0.0512       | 0.061633333  | -0.075433333 | 0.0743       |
| RIPK2        | 0.018066667  | -0.174466667 | -0.0298      | -0.127133333 | -0.1392      |
| FLJ43681     | -0.040633333 | 0.058233333  | -0.0774      | -0.030466667 | -0.0051      |
| NEDD8        | 0.3119       | 0.147333333  | 0.219066667  | 0.094766667  | 0.061566667  |
| RBM25        | 0.1804       | -0.020566667 | 0.2193       | 0.239866667  | 0.1524       |
| LEMD3        | 0.009566667  | 0.006533333  | 0.037566667  | 0.014533333  | -0.072633333 |
| COL11A1      | 0.074966667  | -0.1039      | 0.086066667  | 0.057366667  | -0.0319      |
| LOC651772    | 0.064066667  | -0.030866667 | -0.044933333 | -0.011       | 0.021666667  |
| CBARA1       | -0.052633333 | 0.041966667  | 0.0552       | -0.025866667 | -0.0561      |
| POLE2        | 0.270433333  | 0.171666667  | -0.116133333 | 0.0573       | -0.009766667 |
| FRAT2        | 0.079366667  | -0.141833333 | -0.0827      | 0.0122       | -0.160633333 |
| HAT1         | 0.1238       | 0.3484       | -0.088666667 | 0.056533333  | 0.1221       |
| LOC651621    | -0.014633333 | 0.035166667  | 0.0328       | -0.0924      | 0.0732       |
| ZBTB4        | -0.246066667 | -0.072233333 | 0.206566667  | -0.0965      | -0.058       |
| TMEM186      | 0.1178       | 0.070966667  | -0.112166667 | -0.163266667 | 0.005433333  |
| LOC402677    | -0.614633333 | 0.315966667  | -0.5293      | -0.603533333 | 0.127566667  |
| FIGNL2       | -0.010733333 | 0.1321       | -0.114633333 | -0.062366667 | 0.109533333  |
| LOC100133803 | -0.0387      | 0.308        | -0.067       | 0.012966667  | 0.147166667  |
| RNF185       | 0.0496       | -0.094133333 | -0.033133333 | 0.0131       | -0.126566667 |
| DDX21        | 0.257833333  | 0.0761       | -0.082533333 | 0.218733333  | -0.0282      |
| SLC22A23     | -0.086833333 | 0.0186       | -0.076966667 | -0.0654      | -0.080733333 |
| TMEM60       | -0.219933333 | 0.014666667  | 0.0073       | -0.035933333 | -0.1528      |
| SOCS6        | -0.083333333 | 0.1598       | 0.083566667  | 0.0695       | -0.131433333 |
| SGCB         | -0.0668      | -0.045766667 | 0.086633333  | -0.0843      | -0.0184      |
| SCIN         | 0.008966667  | 0.045533333  | 0.012466667  | 0.012433333  | -0.0091      |
| SCYL1BP1     | -0.045966667 | -0.012033333 | 0.1858       | -0.0419      | 0.096366667  |
| S100A4       | 0.1758       | -0.1044      | 0.343966667  | -0.0655      | 0.0103       |
| GAB2         | 0.1545       | -0.0946      | 0.0154       | 0.096966667  | -0.109466667 |
| BIRC3        | -0.251566667 | 0.717166667  | -0.1821      | 0.0149       | 0.085333333  |

|           |       |              |              |              |              |              |
|-----------|-------|--------------|--------------|--------------|--------------|--------------|
| POMGNT1   |       | -0.0291      | 0.051466667  | 0.085866667  | -0.031       | -0.071066667 |
| OSCP1     |       | -0.100266667 | -0.187733333 | 0.0296       | 0.011333333  | -0.2283      |
| LSM2      |       | -0.003666667 | 0.0722       | 0.143466667  | -0.0037      | 0.0988       |
| C12orf30  |       | 0.109966667  | 0.1071       | -0.044466667 | 0.105933333  | 0.015766667  |
| FBXO21    |       | 8.00E-04     | -0.103533333 | 0.0038       | 0.019666667  | -0.112933333 |
| POLE3     |       | 0.269733333  | 0.207133333  | -0.093133333 | 0.272233333  | 0.024266667  |
| ZSCAN16   |       | -0.063666667 | -0.0166      | -0.292       | -0.100466667 | -0.093866667 |
| KIAA0892  |       | -0.217266667 | -0.016966667 | 0.1453       | -0.121133333 | -0.0582      |
| QSOX1     |       | -0.028966667 | -0.063166667 | -0.124733333 | -0.0582      | -0.008266667 |
| AMD1      |       | 0.166333333  | 0.083433333  | 0.288033333  | 0.113666667  | 0.051633333  |
| ITGA11    |       | 0.0379       | 0.186066667  | 0.033866667  | 0.0141       | 0.0764       |
| ZC3HAV1   |       | -0.0822      | -0.0894      | -0.0013      | -0.305166667 | -0.005233333 |
| CRY2      |       | 0.054833333  | -0.1311      | -0.006766667 | -0.055733333 | -0.108       |
| WDR8      |       | 0.077633333  | -0.003133333 | 0.077733333  | -0.052       | 0.136633333  |
| LOC642590 |       | 0.154766667  | 0.1655       | 0.028566667  | 0.036666667  | 0.159933333  |
| COMMD5    |       | 0.2282       | 0.053766667  | -0.044566667 | -0.0167      | 0.19         |
| NOL8      |       | 0.033433333  | 0.1127       | -0.083866667 | 0.051766667  | 0.137433333  |
| DULLARD   |       | 0.169333333  | 0.128366667  | -0.039666667 | 0.182466667  | 0.0051       |
| LOC647012 |       | -0.0178      | 0.2885       | 0.031266667  | -0.033833333 | 0.067633333  |
| ZNF570    |       | 0.159933333  | -0.098166667 | -0.095133333 | -0.096733333 | 0.022666667  |
| UNC13B    |       | -0.035166667 | 0.055833333  | -0.020933333 | -0.024266667 | 0.012866667  |
| HSPB3     |       | 0.086        | -0.085466667 | -0.178       | 0.056666667  | -0.0094      |
| ASS1      |       | -0.193066667 | -0.059333333 | 0.130366667  | 0.011833333  | -0.2332      |
| ADAMTSL5  |       | -0.0932      | 0.207266667  | 0.0313       | -0.027166667 | 0.0192       |
| ARID4A    |       | -0.075166667 | -0.075133333 | 0.117766667  | 0.0328       | -0.026366667 |
| TUSC1     |       | 0.228466667  | -0.0592      | 0.0135       | 0.1951       | -0.037966667 |
| ERCC6L    |       | 0.3042       | 0.271166667  | -0.120233333 | 0.178233333  | 0.1689       |
| IL11RA    |       | -0.0142      | -0.1369      | 0.136866667  | -0.1581      | -0.0774      |
| HNRPR     |       | 0.2626       | 0.026266667  | 0.169666667  | 0.173933333  | 0.1061       |
| TBL3      |       | 0.0242       | 0.068666667  | 0.059133333  | -0.0647      | 0.021266667  |
| CST7      |       | 0.061833333  | -0.129133333 | 0.1417       | 0.038966667  | -0.079033333 |
| HDHD1A    |       | -0.022833333 | 0.053666667  | 0.0458       | -0.0095      | -0.001466667 |
|           | 1-Mar | -0.254266667 | -0.100066667 | 0.178633333  | -0.269033333 | -0.026333333 |
| LOC728428 |       | -0.0151      | 0.003033333  | 0.205333333  | 0.071266667  | -0.035966667 |
| ABR       |       | 0.001533333  | -0.0427      | 0.0068       | -0.1685      | 0.021033333  |
| ZNF436    |       | -0.203133333 | 0.017033333  | 0.0501       | -0.010766667 | -0.246766667 |
| RAD23A    |       | -0.048066667 | -0.004033333 | 0.216333333  | 0.038433333  | -0.016233333 |
| PREB      |       | 0.1073       | 0.058133333  | -0.043466667 | 0.020066667  | -0.081       |
| NUPL1     |       | 0.1584       | 0.0173       | 0.0567       | 0.091833333  | 0.037766667  |
| LOC729760 |       | -0.639533333 | 0.1136       | -0.502166667 | -0.6848      | 0.2173       |
| SYNCRIP   |       | 0.063966667  | 0.019733333  | 0.071066667  | 0.058466667  | -0.000466667 |
| SERAC1    |       | 0.038533333  | -0.043333333 | -0.043466667 | -0.1154      | -0.030166667 |
| C8orf83   |       | -0.138666667 | -0.015666667 | 0.060233333  | -0.092133333 | -0.053433333 |
| AAK1      |       | -0.1726      | -0.051133333 | 0.129033333  | -0.075966667 | -0.0677      |
| PFDN5     |       | -0.1752      | -0.068166667 | 0.126433333  | -0.113766667 | -0.074666667 |
| PEX11G    |       | -0.214833333 | -0.059533333 | 0.058733333  | -0.2135      | -0.000233333 |
| CRBN      |       | -0.178266667 | -0.1946      | 0.093533333  | -0.0435      | -0.035566667 |

|              |              |              |              |              |              |
|--------------|--------------|--------------|--------------|--------------|--------------|
| NME3         | -0.6299      | -0.200933333 | 0.476066667  | -0.442633333 | -0.166033333 |
| FMNL2        | 0.0982       | 0.077166667  | 0.022933333  | 0.045933333  | 0.115        |
| LOC100134648 | 0.418666667  | 0.0413       | -0.049033333 | 0.218466667  | 0.087333333  |
| LOC728532    | 0.0615       | 0.141933333  | 0.060133333  | 0.055        | 0.008166667  |
| PRKAB2       | -0.154966667 | -0.100533333 | -0.110833333 | -0.1427      | -0.241866667 |
| UPLP         | -0.2065      | -0.010633333 | -0.163933333 | -0.2935      | -0.083466667 |
| LOC645452    | -0.247566667 | 0.8226       | -0.190866667 | -0.135366667 | 0.145966667  |
| TMEM67       | -0.106366667 | -0.061133333 | 0.039633333  | -0.128866667 | -0.0291      |
| ZNF414       | -0.0738      | -0.021866667 | 0.0299       | -0.0821      | -0.044       |
| LOC645691    | -0.023533333 | 0.106766667  | 0.048766667  | 0.0056       | 0.065366667  |
| UGT2B7       | -0.361966667 | -0.074233333 | 0.1566       | -0.251333333 | -0.1752      |
| FAM125A      | -0.314066667 | 0.0065       | 0.1328       | -0.3309      | -0.081266667 |
| SPIN3        | 0.035166667  | 0.070933333  | -0.145533333 | -0.120766667 | 0.0137       |
| LARP4B       | 0.404933333  | -0.0026      | -0.0034      | 0.075766667  | 0.010033333  |
| NIP30        | 0.0332       | -0.0207      | -0.0676      | -0.004766667 | -0.050433333 |
| HDGF2        | 0.432        | -0.002133333 | 0.008        | 0.160566667  | 0.0666       |
| C10orf6      | 0.266833333  | 0.084366667  | 0.007833333  | 0.065        | -0.004633333 |
| CFDP1        | -0.125366667 | 0.0096       | 0.117066667  | -0.1786      | 0.0306       |
| SUMO1        | -0.3667      | 0.329266667  | -0.1651      | -0.170066667 | -0.045133333 |
| C17orf98     | 0.1587       | 0.0219       | -0.202733333 | -0.034466667 | 0.018333333  |
| CEBPZ        | 0.216        | 0.057766667  | -0.017933333 | 0.1063       | 0.058266667  |
| EFR3B        | 0.057266667  | -0.1165      | 0.196333333  | -0.054633333 | -0.056333333 |
| DDX17        | -0.1693      | 0.1669       | 0.0737       | -0.001766667 | -0.0112      |
| ZDHHC12      | -0.1321      | -0.107466667 | 0.205033333  | -0.053866667 | -0.161266667 |
| LRRC37B      | -0.139066667 | -0.072666667 | 0.014733333  | -0.0633      | -0.129666667 |
| DUSP19       | -0.1242      | 0.568433333  | 0.100466667  | -0.037933333 | 0.2608       |
| PSRC1        | -0.018966667 | 0.233733333  | 0.220433333  | 0.208733333  | -0.0116      |
| LOC400652    | -0.669066667 | 0.184966667  | -0.744466667 | -0.728       | 0.1323       |
| LOC100131360 | 0.1701       | -0.193166667 | 0.2211       | 0.100333333  | -0.0045      |
| PTS          | 0.307        | 0.1355       | -0.053733333 | 0.135466667  | 0.0864       |
| CLMN         | -0.211066667 | 0.0386       | 0.088133333  | -0.101766667 | -0.117166667 |
| C7orf28A     | -0.080133333 | 0.1614       | -0.136433333 | -0.098633333 | 0.014233333  |
| SNORD14B     | 0.116733333  | 0.1302       | -0.102033333 | 0.087766667  | 0.033966667  |
| FAM104B      | -0.133933333 | 0.040566667  | -0.1079      | -0.1864      | 0.054366667  |
| FAM89A       | 0.269666667  | -0.1725      | 0.179333333  | 0.146633333  | -0.058666667 |
| BZW2         | 0.131633333  | -0.081866667 | 0.053833333  | 0.085933333  | -0.150533333 |
| STEAP3       | 0.0953       | -0.0392      | 0.0099       | 0.0237       | -0.0029      |
| FLJ31306     | -0.0194      | 0.0534       | -0.085333333 | -0.087833333 | -0.055766667 |
| ACIN1        | 0.118866667  | 0.109333333  | 0.082766667  | 0.100266667  | 0.044833333  |
| C6orf89      | 0.017733333  | 0.014166667  | -0.058233333 | 0.062833333  | -0.130766667 |
| MTX3         | 0.176966667  | -0.0577      | -0.1792      | -0.0299      | -0.098966667 |
| LOC100132724 | -0.060433333 | 0.4091       | -0.1644      | 0.079633333  | 0.055966667  |
| LMTK2        | 0.099066667  | 0.0576       | -0.037833333 | 0.0562       | 0.022466667  |
| LOC144438    | 0.023766667  | -0.080033333 | 0.069066667  | -0.0969      | -0.0994      |
| LOC392221    | -0.1646      | 0.076166667  | -0.043933333 | -0.010333333 | -0.034866667 |
| LOC728590    | -0.0213      | -0.083966667 | -0.0821      | -0.095433333 | -0.104466667 |
| SRRM1        | 0.111433333  | 0.019733333  | 0.067533333  | 0.066866667  | 0.009733333  |

|              |              |              |              |              |              |
|--------------|--------------|--------------|--------------|--------------|--------------|
| CDC2L2       | 0.013566667  | -0.097466667 | 0.0807       | -0.0899      | 0.0112       |
| NEDD1        | 0.229833333  | 0.112533333  | -0.047233333 | -0.0542      | 0.140533333  |
| NSUN5B       | -0.167133333 | -0.097033333 | -0.009133333 | -0.2314      | -0.0705      |
| TNFRSF1A     | -0.430633333 | -0.1364      | 0.1991       | -0.439233333 | -0.1271      |
| DFFB         | 0.071666667  | 0.094066667  | -0.009033333 | 0.014366667  | 0.025633333  |
| ARRDC4       | 0.0377       | -0.134166667 | -0.035333333 | 0.025266667  | -0.112566667 |
| KIAA1143     | 0.247233333  | 0.120033333  | -0.0404      | 0.0761       | 0.153666667  |
| ZNF658       | -0.2486      | -0.010866667 | -0.029333333 | -0.109666667 | -0.084633333 |
| CSK          | 0.092266667  | 0.1282       | 0.013866667  | 0.0374       | 0.0761       |
| CXorf26      | 0.198333333  | 0.112566667  | -0.086       | 0.126733333  | 0.094033333  |
| CLUAP1       | -0.1466      | 0.006866667  | -0.089233333 | -0.1524      | -0.036933333 |
| NAPB         | -0.038366667 | -0.1253      | -0.0214      | -0.106133333 | -0.179733333 |
| RPS6KA5      | 0.0165       | -0.013566667 | 0.203966667  | 0.0366       | -0.019733333 |
| C2orf43      | -0.143833333 | 0.034433333  | 0.032        | -0.0934      | -0.0132      |
| F11R         | -0.389666667 | 0.076866667  | 0.015133333  | -0.368666667 | -0.070566667 |
| C17orf39     | -0.0133      | 0.0177       | -0.008166667 | -0.0002      | -0.0488      |
| LOC100132503 | -0.064933333 | 0.0905       | -0.035666667 | -0.029733333 | -0.2088      |
| ATPBD3       | 0.1057       | 0.245233333  | -0.037566667 | 0.068266667  | 0.120133333  |
| CCL28        | -0.102933333 | -0.019533333 | -0.026533333 | -0.160866667 | -0.1426      |
| MON2         | -0.058433333 | -0.0168      | 0.009        | -0.009966667 | -0.102566667 |
| LOC100128883 | -0.055633333 | 0.075633333  | 0.047666667  | -0.0126      | 0.127566667  |
| TBC1D20      | -0.0257      | -0.132266667 | -0.023733333 | 0.013633333  | -0.187733333 |
| LSM5         | -0.1398      | 0.263766667  | -0.106566667 | -0.176433333 | 0.110766667  |
| TRMT112      | 0.084233333  | 0.0489       | 0.106266667  | 0.056366667  | -0.0271      |
| SEC13        | 0.302833333  | 0.1218       | 0.118633333  | 0.224833333  | 0.136766667  |
| SAAL1        | 0.132666667  | 0.078866667  | -0.0401      | 0.022466667  | -0.000133333 |
| PET112L      | -0.061966667 | 0.027366667  | 0.007333333  | -0.065833333 | 0.028233333  |
| SLC39A4      | -0.1887      | -0.019       | 0.182766667  | 0.007966667  | -0.103366667 |
| MDM4         | -0.0286      | 0.047366667  | -0.0586      | -0.0851      | -0.0049      |
| LOC391334    | 0.088333333  | 0.0942       | 0.053266667  | 0.040866667  | 0.001433333  |
| EIF3C        | 0.0327       | -0.067166667 | -0.082566667 | -0.1063      | 0.008433333  |
| LOC728787    | 0.314566667  | 0.034633333  | -0.087766667 | 0.205933333  | -0.117666667 |
| FLJ20920     | -0.0339      | 0.0006       | 0.075166667  | -0.000266667 | -0.0578      |
| ADNP         | 0.2568       | -0.015       | 0.022133333  | 0.0373       | -0.010033333 |
| SFMBT1       | 0.420233333  | 0.0806       | -0.0578      | 0.2933       | 0.087        |
| DHFR         | 0.170366667  | 0.131833333  | 0.0502       | 0.1767       | 0.1551       |
| NOL6         | 0.2988       | 0.1605       | -0.188633333 | 0.065033333  | 0.092633333  |
| POMT2        | -0.001633333 | -0.139533333 | -0.0026      | -0.064266667 | -0.1868      |
| AKAP12       | 0.0988       | 0.005133333  | 0.213633333  | -0.020833333 | 0.097866667  |
| EIF4G3       | -0.123566667 | -0.005633333 | 0.0702       | -0.173866667 | -0.1317      |
| SLC44A4      | -0.0942      | 0.4145       | -0.0652      | -0.075933333 | 0.076833333  |
| GLRX2        | 0.184633333  | 0.1757       | -0.100566667 | 0.0555       | 0.111966667  |
| VTI1B        | -0.107466667 | 0.041866667  | -0.087933333 | -0.123133333 | -0.0707      |
| PGM2         | 0.175333333  | -0.092166667 | 0.048933333  | 0.025866667  | 0.101766667  |
| LOC100128533 | 0.0736       | 0.0155       | -0.090533333 | 0.013133333  | -0.060533333 |
| STGC3        | 0.0006       | 0.080566667  | -0.034466667 | -0.046666667 | 0.033        |
| LOC728216    | -0.097166667 | 0.192666667  | -0.094033333 | -0.007066667 | -0.064633333 |

|              |              |              |              |              |              |
|--------------|--------------|--------------|--------------|--------------|--------------|
| LOC729446    | -0.008       | 0.0522       | 0.0349       | -0.133666667 | -0.007133333 |
| FTSJ3        | 0.369633333  | 0.0967       | -0.178233333 | 0.183233333  | 0.002566667  |
| P4HB         | -0.093533333 | -0.1561      | 0.064233333  | -0.1674      | -0.164833333 |
| LOC729926    | -0.107033333 | -0.017766667 | 0.051333333  | -0.050066667 | -0.105166667 |
| PYGL         | -0.270066667 | -0.2459      | 0.297633333  | -0.238133333 | -0.177       |
| WASH5P       | 0.050766667  | 0.050166667  | -0.0666      | 0.090666667  | -0.061833333 |
| FLJ46309     | -0.1365      | 0.416533333  | -0.028733333 | -0.11        | 0.1155       |
| LOC653377    | -0.134766667 | 0.030733333  | 0.162166667  | 0.035233333  | -0.078633333 |
| WDHD1        | 0.114566667  | 0.116433333  | 0.0947       | 0.091133333  | 0.0322       |
| ACTB         | 0.5377       | -0.0812      | 0.000633333  | 0.225866667  | 0.049533333  |
| RSPH3        | -0.353533333 | -0.137133333 | 0.144733333  | -0.306966667 | -0.0287      |
| UTP20        | 0.150066667  | 0.0297       | -0.0017      | 0.084766667  | -0.0026      |
| UBXN1        | -0.281133333 | -0.044033333 | 0.219033333  | -0.0922      | -0.093666667 |
| MPV17L       | 0.101433333  | 0.0954       | -0.1141      | 0.033        | -0.0836      |
| C21orf126    | 0.1397       | 0.041366667  | 0.0979       | 0.1439       | -0.09        |
| CCDC123      | 0.149733333  | 0.003        | 0.046666667  | 0.098533333  | -0.042233333 |
| NIN          | 0.207733333  | -0.0911      | 0.111266667  | 0.094033333  | 0.1152       |
| WDR61        | -0.107133333 | -0.1597      | 0.150866667  | -0.225666667 | -0.005933333 |
| CHCHD1       | -0.140733333 | 0.170066667  | 0.054466667  | -0.0997      | -0.041233333 |
| MYST2        | 0.006933333  | 0.091433333  | 0.0187       | 0.030533333  | -0.036733333 |
| SNAP25       | -0.104633333 | 0.1155       | 0.4829       | -0.1354      | 0.0945       |
| PGM2L1       | 0.028566667  | 0.011466667  | -0.051966667 | -0.0125      | -0.087533333 |
| SLC25A46     | 0.0184       | 0.0865       | -0.107133333 | -0.0241      | 0.012666667  |
| TP53INP1     | -0.184966667 | -0.084966667 | -0.110966667 | -0.193566667 | -0.133333333 |
| CETN3        | 0.005233333  | 0.0706       | 0.131        | -0.1446      | 0.1203       |
| LOC100128775 | -0.336666667 | 0.021333333  | -0.027566667 | -0.3942      | 0.067933333  |
| PXMP4        | -0.078666667 | -0.053433333 | 0.0236       | -0.142133333 | 0.047666667  |
| EIF2C2       | 0.566233333  | 0.1902       | 0.214066667  | 0.319066667  | 0.1743       |
| C9orf114     | 0.2754       | 0.170766667  | -0.027733333 | 0.170066667  | 0.049133333  |
| SKAP2        | -0.295033333 | -0.068833333 | 0.286233333  | -0.358333333 | -0.033466667 |
| UQCRQ        | 0.007866667  | -0.136333333 | 0.0223       | -0.094       | -0.0941      |
| KARS         | 0.2658       | -0.024033333 | 0.069833333  | 0.107533333  | -0.031866667 |
| TAF4         | 0.2683       | 0.040433333  | -0.0073      | 0.2322       | 0.017066667  |
| KRT10        | 0.009366667  | -0.097466667 | -0.089466667 | -0.236266667 | -0.078433333 |
| TMEM17       | -0.188866667 | 0.574433333  | -0.044133333 | -0.1447      | 0.1525       |
| MFN2         | 0.143566667  | 0.1462       | -0.040033333 | 0.188333333  | -0.0706      |
| SAPS3        | 0.3202       | 0.074533333  | 0.049233333  | 0.225        | -0.032566667 |
| LQK1         | 0.044366667  | -0.031633333 | -0.064233333 | 0.032266667  | -0.132766667 |
| APLP1        | -0.073633333 | -0.1142      | 0.125133333  | -0.120166667 | -0.146033333 |
| KIAA0100     | 0.045966667  | 0.199        | -0.036966667 | -0.024633333 | -0.0125      |
| LOC100132727 | -0.296366667 | 0.584033333  | -0.1769      | -0.164866667 | 0.160066667  |
| GSTTP2       | 0.001466667  | 0.693666667  | -0.237933333 | 0.059533333  | 0.254633333  |
| LOC100127918 | 0.105433333  | 0.125066667  | 0.003166667  | 0.1185       | -0.0923      |
| KIAA0586     | -0.0523      | 0.169466667  | 0.0824       | -0.0384      | -0.0096      |
| LOC730004    | -0.492533333 | 0.2299       | -0.314533333 | -0.4272      | 0.006966667  |
| NEK2         | 0.089133333  | 0.185533333  | 0.071166667  | 0.198666667  | 0.0206       |
| C9orf90      | 0.065133333  | 0.049833333  | 0.012933333  | -0.1249      | 0.1274       |

|              |              |              |              |              |              |
|--------------|--------------|--------------|--------------|--------------|--------------|
| DARS2        | -0.018166667 | 0.195        | 0.014733333  | -0.0387      | 0.030233333  |
| KCNK4        | 0.124633333  | 0.0825       | 0.006166667  | 0.164866667  | 0.024933333  |
| ZNF281       | -0.119033333 | -0.0993      | 0.030133333  | -0.037733333 | 0.081733333  |
| RMND5A       | 0.043966667  | 0.0359       | -0.061933333 | 0.109733333  | -0.001533333 |
| HRSP12       | -0.174766667 | 0.150766667  | -0.0794      | -0.188333333 | 0.073166667  |
| C14orf32     | 0.0267       | 0.094533333  | 0.006966667  | -0.033033333 | -0.0367      |
| SELK         | 0.107433333  | 0.1581       | -0.0322      | 0.093366667  | -0.008       |
| FN1          | 0.053533333  | -0.033566667 | 0.079        | -0.059933333 | 0.031133333  |
| LOC391075    | -0.164666667 | 0.0356       | 0.261666667  | -0.049       | -0.0679      |
| EPB41L2      | 0.052966667  | 0.119333333  | -0.059766667 | -0.021833333 | 0.1753       |
| C1orf156     | -0.090366667 | 0.1179       | -0.184233333 | -0.1434      | 0.075633333  |
| LOC100128196 | 0.011366667  | 0.025033333  | -0.1602      | -0.0909      | -0.086233333 |
| LOC653583    | -0.050166667 | 0.093033333  | 0.185433333  | 0.092766667  | 0.0304       |
| PAGE5        | -0.063033333 | -0.168966667 | 0.244033333  | -0.044866667 | -0.035766667 |
| PPM1H        | -0.175733333 | -0.054666667 | -0.0537      | -0.224       | -0.026333333 |
| SC65         | -0.0117      | -0.1114      | 0.2444       | -0.000966667 | -0.172033333 |
| GAL3ST4      | -0.3183      | 0.0977       | 0.040133333  | -0.271433333 | 0.000166667  |
| TMEM134      | -0.174366667 | -0.112433333 | 0.1519       | -0.129033333 | -0.2225      |
| HNRNPR       | 0.1376       | 0.183666667  | 0.040666667  | 0.1443       | 0.060033333  |
| RARS         | 0.104566667  | 0.116733333  | -0.044633333 | -0.005066667 | 0.026366667  |
| UBASH3B      | 0.061566667  | 0.182333333  | -0.001333333 | 0.0541       | 0.095433333  |
| DIS3L2       | -0.0343      | 0.008966667  | -0.130466667 | -0.0539      | -0.090666667 |
| ZNF500       | 0.011533333  | -0.134333333 | 0.0524       | -0.082833333 | -0.117433333 |
| SLC36A1      | 0.1895       | -0.0595      | 0.112233333  | 0.1327       | -0.079       |
| LOC645743    | 0.142733333  | 0.130433333  | -0.0858      | 0.033933333  | 0.041        |
| TXN2         | -0.099166667 | -0.0565      | 0.219933333  | -0.079766667 | 0.0125       |
| LOC644464    | -0.003466667 | -0.0143      | 0.090166667  | 0.0182       | -0.056033333 |
| KIAA1429     | 0.2037       | 0.034233333  | -0.0416      | 0.130533333  | 0.018533333  |
| INCENP       | 0.295933333  | 0.090933333  | -0.134466667 | 0.115966667  | -0.007333333 |
| LOC653156    | -0.149433333 | -0.073       | 0.0402       | -0.0952      | 0.003366667  |
| ARS2         | 0.331        | 0.1023       | -0.0275      | 0.169033333  | 0.113733333  |
| KLRG1        | -0.106033333 | -0.150866667 | 0.152333333  | -0.132333333 | 0.0151       |
| C20orf29     | -0.053533333 | -0.035833333 | 0.0096       | -0.087366667 | -0.024266667 |
| FAM109A      | 0.2436       | -0.166066667 | 0.076833333  | 0.054466667  | 0.077633333  |
| PI4KAP2      | 0.095266667  | -0.056866667 | -0.022633333 | 0.028566667  | -0.132266667 |
| LOC652491    | -0.0428      | -0.0875      | 0.076833333  | -0.0134      | -0.120466667 |
| PRICKLE2     | 0.001833333  | -0.0828      | 0.036066667  | -0.076133333 | 0.013866667  |
| FBRS         | -0.0036      | -0.086633333 | 0.113033333  | 0.100666667  | -0.1708      |
| KDEL3        | -0.275433333 | -0.087       | 0.322066667  | -0.206333333 | -0.030533333 |
| FKBP8        | -0.076966667 | -0.1805      | 0.192766667  | -0.065466667 | -0.170466667 |
| KRCC1        | -0.206366667 | -0.198       | 0.242433333  | -0.276633333 | -0.0482      |
| MRPL54       | 0.113333333  | 0.0008       | -0.068866667 | 0.031766667  | 0.093533333  |
| LOC729832    | 0.1206       | 0.1501       | -0.0028      | 0.054166667  | -0.001566667 |
| TRPC1        | -0.0695      | -0.019533333 | 0.0215       | -0.170866667 | -0.016733333 |
| LOC649679    | 0.293266667  | 0.196566667  | -0.0464      | 0.009166667  | 0.178666667  |
| SNX19        | -0.035333333 | -0.049866667 | 0.004933333  | -0.104166667 | -0.087566667 |
| CTNBL1       | 0.096633333  | 0.068566667  | -0.0078      | 0.093233333  | -0.039233333 |

|               |              |              |              |              |              |
|---------------|--------------|--------------|--------------|--------------|--------------|
| 10-Sep        | -0.001       | -0.0182      | 0.0274       | 0.045266667  | 0.020033333  |
| LOC286016     | -0.111066667 | 0.018166667  | 0.1027       | 0.0071       | -0.0049      |
| CENPQ         | 0.218433333  | 0.022433333  | -0.050933333 | 0.009833333  | 0.0362       |
| SLC16A12      | -0.04        | 0.618733333  | -0.150466667 | 0.050966667  | -0.073033333 |
| ZNF486        | -0.1865      | 0.571166667  | -0.1978      | -0.1574      | 0.154433333  |
| LOC100130308  | 0.065466667  | -0.0393      | -0.0241      | -0.027333333 | 0.009733333  |
| REV1          | 0.144366667  | 0.061166667  | -0.0263      | 0.1255       | -0.1285      |
| LOC643918     | 0.259866667  | 0.119233333  | -0.072433333 | -0.055866667 | 0.132        |
| TMEM62        | 0.055166667  | -0.025833333 | -0.2279      | -0.028333333 | -0.156766667 |
| SLC35C1       | 0.012333333  | -0.0212      | 0.040566667  | -0.060366667 | -0.1168      |
| SFRS11        | -0.058066667 | 0.042933333  | -0.1936      | -0.217       | 0.1479       |
| PPP2R1B       | 0.188633333  | 0.151966667  | -0.0052      | 0.092233333  | 0.093666667  |
| DTWD1         | -0.014266667 | 0.159066667  | -0.1303      | -0.0464      | 0.040633333  |
| MGC26356      | 0.056866667  | 0.4591       | 0.0348       | -0.012733333 | 0.1256       |
| LOC388654     | 0.040366667  | 0.075733333  | -0.041266667 | -0.005433333 | -0.055766667 |
| PEMT          | -0.178066667 | 0.0089       | 0.0858       | -0.148366667 | -0.033833333 |
| ZBED3         | -0.192166667 | -0.210233333 | -0.169866667 | -0.2388      | -0.319433333 |
| C9orf82       | -0.0677      | -0.167966667 | 0.091666667  | -0.1816      | -0.0946      |
| YIPF3         | -0.445366667 | 0.0404       | 0.1515       | -0.337566667 | -0.0223      |
| ZNF432        | -0.080766667 | 0.1043       | 0.0769       | -0.0344      | 0.031933333  |
| LOC402694     | 0.1601       | -0.1577      | 0.0961       | 0.013666667  | -0.021433333 |
| FAM86C        | 0.0083       | -0.110333333 | -0.003366667 | -0.130233333 | -0.086333333 |
| JAGN1         | 0.078966667  | -0.0143      | -0.056166667 | 0.057066667  | -0.115833333 |
| ZNF669        | -0.1891      | 0.447533333  | -0.090466667 | -0.067266667 | 0.105233333  |
| APH1B         | -0.276233333 | -0.1401      | 0.159933333  | -0.209266667 | -0.222566667 |
| FCGR2A        | -0.174733333 | -0.010233333 | 0.162066667  | -0.110233333 | -0.002866667 |
| NRM           | 0.0313       | 0.207833333  | 0.0442       | 0.045533333  | 0.071866667  |
| CLIP2         | -0.158533333 | -0.0474      | 0.127        | -0.1671      | -6.67E-05    |
| LOC100128007  | 0.2439       | 0.215066667  | -0.018633333 | 0.3268       | 0.01         |
| GXYLT2        | -0.133966667 | -0.007133333 | 0.029666667  | -0.095533333 | -0.071666667 |
| GTF3C5        | 0.2315       | 0.0463       | -0.0295      | 0.093633333  | -0.0471      |
| MORF4L1       | -0.018933333 | 0.004033333  | 0.095633333  | -0.045233333 | -0.024233333 |
| WDR68         | 0.0334       | -0.065366667 | 0.047733333  | -0.022466667 | -0.131866667 |
| TSFM          | 0.175366667  | -0.004733333 | -0.0278      | 0.016266667  | -0.0331      |
| ANKRD36       | 0.098966667  | -0.092366667 | 0.2457       | -0.016366667 | -0.051066667 |
| COQ7          | 0.165666667  | 0.187066667  | -0.2077      | 0.1291       | 0.089933333  |
| HNRPA2B1      | 0.086133333  | 0.067266667  | 0.038233333  | -0.052733333 | 0.125533333  |
| ZFYVE21       | -0.097733333 | -0.0535      | 0.098233333  | -0.1114      | -0.149666667 |
| LOC388122     | -0.138266667 | 0.162066667  | 0.0047       | 0.024733333  | 0.1236       |
| PIK4CA        | 0.0615       | -0.040433333 | -0.0454      | -0.0751      | -0.031766667 |
| KCTD9         | 0.163233333  | -0.0735      | 0.099266667  | 0.0305       | 0.004233333  |
| LOC100133277  | -0.327066667 | 0.351366667  | -0.5833      | -0.335833333 | 0.035433333  |
| FCGR2B        | 0.075533333  | -0.213033333 | -0.0994      | -0.207533333 | -0.128433333 |
| EEF1D         | 0.009633333  | -0.105366667 | -0.097666667 | -0.1052      | -0.041966667 |
| RP11-529I10.4 | -0.245166667 | -0.048933333 | 0.125066667  | -0.194866667 | -0.086433333 |
| ARID1A        | -0.0749      | 0.168433333  | 0.210066667  | -0.031333333 | -0.0115      |
| PLEKHJ1       | 0.0955       | 0.0406       | 0.042766667  | -0.022833333 | 0.028666667  |



|              |              |              |              |              |              |
|--------------|--------------|--------------|--------------|--------------|--------------|
| PDLIM7       | -0.114166667 | -0.0218      | 0.468033333  | -0.172933333 | 0.112333333  |
| CHERP        | 0.372        | 0.120433333  | -0.104033333 | 0.225433333  | -0.089033333 |
| SUV39H2      | 0.170766667  | 0.0488       | -0.0435      | -0.001766667 | 0.027033333  |
| SNORA57      | 0.194766667  | -0.0456      | -0.1617      | -0.0021      | -0.0772      |
| LRRC16A      | -0.193866667 | 0.085666667  | 0.0171       | -0.138933333 | -0.071033333 |
| LOC100128115 | 0.162466667  | 0.016666667  | 0.003566667  | -0.006666667 | 0.039333333  |
| MIR607       | 0.0215       | -0.093066667 | 0.008        | -0.073166667 | -0.091533333 |
| LOC100130557 | 0.0161       | 0.0797       | -0.0105      | -0.123933333 | 0.082633333  |
| BAT3         | 0.118666667  | -0.146066667 | -0.021533333 | -0.1209      | -0.016033333 |
| LOC644934    | 0.207866667  | 0.090066667  | 0.0142       | 0.2162       | -0.005966667 |
| EIF1AY       | -0.014066667 | 0.147333333  | -0.0207      | -0.0708      | 0.065666667  |
| LOC728678    | -0.1267      | 0.235266667  | -0.086166667 | -0.053866667 | -0.184966667 |
| GLI3         | -0.086433333 | -0.065033333 | 0.113833333  | -0.1518      | -0.169633333 |
| CALD1        | -0.264366667 | -0.060933333 | 0.247666667  | -0.213333333 | -0.108133333 |
| HERC4        | -0.2598      | 0.076233333  | 0.149766667  | -0.086       | 0.0587       |
| KIAA1641     | 0.036833333  | -0.164766667 | 0.102566667  | -0.1181      | 0.042933333  |
| BCL2A1       | 0.0985       | -0.004133333 | -0.0132      | -0.0287      | -0.059733333 |
| QSER1        | 0.385733333  | 0.118466667  | -0.088733333 | 0.2527       | -0.054566667 |
| LOC100131265 | 0.0241       | 0.028        | 0.026666667  | 0.132766667  | -0.172666667 |
| ROCK1        | -0.2183      | 0.085366667  | -0.006366667 | -0.1382      | -0.040966667 |
| LOC648581    | 0.1285       | 0.016633333  | -0.096666667 | 0.063766667  | 0.0401       |
| LOC100129657 | -0.229366667 | 0.124833333  | -0.231333333 | -0.1824      | -0.006633333 |
| PRMT10       | -0.0618      | 0.109166667  | -0.0648      | -0.0662      | 0.0485       |
| TOE1         | 0.277133333  | 0.1801       | -0.128566667 | 0.102333333  | -0.004166667 |
| LOC729764    | -0.0849      | -0.009033333 | 0.1959       | -0.07        | 0.029766667  |
| TMEM168      | 0.120833333  | 0.0827       | -0.0151      | -0.0112      | -0.0143      |
| RAD54B       | 0.113766667  | 0.237166667  | 0.1021       | 0.072333333  | -0.000166667 |
| BRPF3        | 0.177766667  | -0.000866667 | -0.018466667 | -0.035466667 | -0.034766667 |
| MDC1         | 0.275666667  | 0.174566667  | -0.0999      | 0.138333333  | 0.0458       |
| HJURP        | 0.4157       | 0.2482       | -0.0594      | 0.325666667  | -0.058966667 |
| LOC729004    | -0.2845      | 0.273033333  | -0.415766667 | -0.4857      | 0.175166667  |
| ACTN1        | 0.3183       | -0.011533333 | 0.106033333  | 0.207233333  | 0.076333333  |
| PRPF8        | 0.087466667  | -0.1811      | 0.0897       | -0.141066667 | -0.034633333 |
| ZNF576       | 0.331266667  | 0.055333333  | 0.0108       | 0.192933333  | 0.068233333  |
| KLF4         | -0.0254      | -0.131033333 | -0.097366667 | -0.213566667 | -0.049233333 |
| HYI          | 0.107866667  | 0.088466667  | 0.078966667  | -0.0489      | 0.076366667  |
| C3orf60      | -0.1396      | 0.0955       | 0.018566667  | -0.044733333 | -0.051233333 |
| LOC90120     | -0.013366667 | -0.036233333 | -0.049266667 | -0.119366667 | -0.024866667 |
| RPS20        | -0.0139      | 0.044333333  | 0.020066667  | -0.001433333 | -0.082966667 |
| ZNF296       | 0.465533333  | 0.096466667  | 0.001733333  | 0.321466667  | 0.096233333  |
| LOC646347    | 0.2115       | 0.111533333  | -0.0194      | 0.131833333  | 0.034166667  |
| TRIM36       | 0.0445       | -0.122866667 | 0.0411       | -0.036366667 | -0.057533333 |
| IPO8         | -0.0714      | -0.049966667 | 0.0636       | -0.142566667 | -0.0814      |
| AMY1C        | 0.236333333  | -0.109433333 | -0.065566667 | 0.0293       | -0.116566667 |
| NBEA         | -0.199833333 | -0.131966667 | 0.2787       | -0.2111      | 0.044733333  |
| LOC100129759 | 0.035833333  | 0.169666667  | 0.028333333  | -0.0594      | 0.165566667  |
| RPL4         | 0.073433333  | -0.098533333 | 0.043466667  | 0.036033333  | -0.088266667 |

|              |              |              |              |              |              |
|--------------|--------------|--------------|--------------|--------------|--------------|
| LOC100130938 | 0.065833333  | 0.072266667  | 0.095166667  | -0.0055      | 0.045133333  |
| TMEM219      | -0.198533333 | -0.095866667 | 0.239566667  | -0.229833333 | -0.1247      |
| AK2P2        | 0.0894       | 0.273566667  | -0.069933333 | 0.003366667  | 0.0794       |
| LOC652968    | -0.155466667 | 0.002966667  | 0.204933333  | -0.148466667 | 0.016166667  |
| EIF4E2       | 0.0453       | 0.046466667  | 0.088233333  | 0.047833333  | -0.0171      |
| DCTN3        | -0.092433333 | -0.015       | 0.129766667  | -0.048366667 | -0.003833333 |
| FLJ90757     | -0.175366667 | -0.0523      | 0.146333333  | -0.095266667 | -0.023366667 |
| FLJ38717     | 0.067833333  | 0.307166667  | -0.126833333 | 0.0618       | -0.027533333 |
| SLC19A2      | -0.0397      | 0.081733333  | -0.0668      | -0.1381      | -0.049066667 |
| MIB1         | -0.167066667 | -0.224933333 | 0.154633333  | -0.1084      | -0.0176      |
| MARS         | -0.155066667 | 0.074433333  | -0.130133333 | -0.129233333 | -0.040966667 |
| SMUG1        | -0.1426      | -0.013433333 | 0.015066667  | -0.1075      | -0.067866667 |
| IER5L        | -0.010666667 | -0.1425      | 0.2599       | 0.071766667  | -0.170766667 |
| CHMP2B       | -0.1054      | -0.0254      | 0.147966667  | -0.0832      | 0.032833333  |
| KCTD11       | -0.0333      | -0.188966667 | -0.0506      | -0.083866667 | -0.170533333 |
| LOC651198    | -0.130633333 | 0.0312       | -0.2389      | -0.090333333 | -0.138666667 |
| MORN2        | 0.0478       | -0.061233333 | -0.0553      | -0.079733333 | 0.020766667  |
| PIK3C3       | -0.158433333 | -0.0222      | 0.195966667  | -0.074533333 | -0.0153      |
| LMCD1        | -0.312833333 | -0.0254      | 0.164733333  | -0.266733333 | 0.029533333  |
| CCNT2        | 0.014033333  | -0.096366667 | 0.0824       | 0.061133333  | -0.066566667 |
| TMTC4        | -0.073833333 | -0.0722      | 0.183533333  | -0.0157      | -0.023766667 |
| IMMT         | 0.023        | -0.017366667 | 0.0442       | -0.007833333 | -0.088833333 |
| KDM5B        | -0.392066667 | -0.0435      | 0.4175       | -0.1364      | -0.025766667 |
| C15orf17     | -0.302333333 | -0.133833333 | -0.067633333 | -0.2455      | -0.135233333 |
| DAB2         | -0.166266667 | -0.099466667 | 0.108033333  | -0.0822      | -0.064766667 |
| GUK1         | -0.149133333 | 0.0082       | 0.071633333  | -0.020566667 | -0.1167      |
| RPS21        | 0.161333333  | -0.122966667 | -0.0368      | -0.075433333 | -0.080533333 |
| ZMYM4        | -0.118566667 | -0.150233333 | 0.0963       | -0.179633333 | 0.0321       |
| NCK2         | 0.014233333  | -0.091933333 | -0.030933333 | -0.0683      | -0.028966667 |
| SHROOM4      | -0.2028      | 0.783166667  | 0.096333333  | -0.014933333 | 0.2857       |
| FCHSD2       | 0.1121       | 0.0714       | 0.072766667  | 0.076266667  | -0.091233333 |
| CASP9        | -0.133133333 | -0.088433333 | 0.141333333  | -0.222       | -0.060666667 |
| ZMPSTE24     | 0.102733333  | 0.1738       | -0.130233333 | -0.012166667 | 0.105433333  |
| PRCC         | 0.224733333  | 0.261666667  | 0.0166       | 0.113266667  | 0.1373       |
| LOC647346    | -0.116666667 | 0.167533333  | -0.118033333 | -0.095333333 | 0.023866667  |
| LOC729362    | -0.339733333 | 0.131833333  | 0.028566667  | -0.203233333 | -0.103866667 |
| WDR90        | 0.0199       | 0.0674       | 0.075033333  | 0.116766667  | -0.076466667 |
| CEP70        | -0.2609      | 0.028166667  | 0.0875       | -0.197233333 | -0.116333333 |
| LOC644330    | -0.0166      | 0.376433333  | -0.194       | 0.0431       | 0.132033333  |
| CHD2         | -0.0112      | -0.105966667 | -0.046833333 | -0.022433333 | -0.169733333 |
| PPWD1        | 0.0632       | 0.226033333  | 0.0158       | 0.172733333  | -0.046       |
| RANBP1       | 0.4298       | 0.148833333  | -0.1544      | 0.236033333  | 0.0807       |
| BSG          | 0.0205       | -0.1168      | 0.099033333  | 0.017133333  | -0.141333333 |
| TOP2B        | -0.093566667 | 0.007766667  | 0.292366667  | 0.0228       | -0.021433333 |
| TRAM1        | 0.072833333  | -0.0507      | 0.050866667  | 0.0269       | -0.092333333 |
| TTF1         | 0.1846       | 0.0832       | 0.019666667  | 0.138033333  | -0.040366667 |
| NDUFS3       | -0.0539      | 0.015066667  | 0.117266667  | 0.014266667  | -0.0041      |

|              |              |              |              |              |              |
|--------------|--------------|--------------|--------------|--------------|--------------|
| LOC728476    | 0.236266667  | 0.060566667  | 0.101066667  | 0.2232       | -0.023466667 |
| GALM         | 0.019666667  | 0.0317       | 0.024066667  | -0.018466667 | -0.026666667 |
| TRK1         | 0.145266667  | 0.250233333  | 0.001        | 0.077933333  | 0.245833333  |
| LOX          | 0.001566667  | 0.0482       | 0.064233333  | -0.044066667 | 0.029833333  |
| LOC646195    | -0.1011      | 0.0395       | 0.0873       | -0.1255      | -0.019666667 |
| LOC100130233 | -0.5039      | 0.531966667  | -0.741366667 | -0.5521      | 0.444566667  |
| LOC440093    | -0.179233333 | 0.387        | -0.1955      | -0.184366667 | 0.148266667  |
| LIG4         | 0.0523       | 0.1134       | -0.083633333 | -0.036266667 | -0.006633333 |
| LOC100128337 | -0.1846      | 0.310966667  | -0.113833333 | 0.020366667  | -0.002933333 |
| PAFAH1B2     | 0.163        | 0.1158       | 0.038033333  | 0.0598       | 0.018166667  |
| TADA1L       | 0.243366667  | 0.1039       | -0.009766667 | 0.119        | -0.047533333 |
| LOC730740    | -0.0955      | -0.054766667 | 0.1915       | -0.1053      | 0.054033333  |
| UPF2         | 0.145533333  | 0.0957       | -0.0665      | 0.134266667  | -0.029566667 |
| C5orf15      | -0.125133333 | 0.044933333  | 0.187733333  | -0.070133333 | -0.069266667 |
| PTPRA        | -0.212033333 | -0.048033333 | 0.1469       | -0.240966667 | -0.1035      |
| RPL36        | 0.160366667  | 0.096166667  | -0.0603      | 0.051        | 0.035966667  |
| LOC389404    | -0.494666667 | 0.2053       | -0.5454      | -0.531633333 | 0.112866667  |
| LOC100128585 | 0.0949       | -0.0512      | -0.157466667 | -0.025133333 | -0.000133333 |
| LOC642250    | -0.418366667 | 0.217933333  | -0.5283      | -0.410433333 | 0.064666667  |
| GPATCH4      | 0.326033333  | 0.262733333  | -0.1967      | 0.140166667  | 0.075533333  |
| RTEL1        | 0.1375       | -0.040966667 | 0.067666667  | 0.0209       | -0.068233333 |
| UPF3B        | 0.1839       | 0.014666667  | -0.253633333 | -0.049433333 | -0.067933333 |
| TMEM116      | -0.256533333 | -0.049666667 | -0.045933333 | -0.258433333 | -0.137466667 |
| RAB40C       | -0.069166667 | 0.030633333  | -0.013933333 | -0.0873      | -0.100966667 |
| SNRNP70      | 0.334433333  | 0.212666667  | 0.125633333  | 0.105566667  | 0.1769       |
| LOC729617    | 0.066466667  | 0.073933333  | 0.010433333  | 0.0683       | -0.034666667 |
| ZFYVE1       | -0.215433333 | 0.035433333  | -0.0492      | -0.108266667 | -0.186866667 |
| LOC642367    | -0.120733333 | 0.116366667  | -0.049833333 | -0.0593      | -0.075866667 |
| ITGB1        | 0.050866667  | -0.0202      | 0.137533333  | 0.1016       | -0.093933333 |
| LOC728873    | 0.3827       | 0.092133333  | -0.001533333 | 0.254866667  | 0.033        |
| RNF34        | 0.1288       | -0.062833333 | 0.065066667  | -0.022733333 | -0.056666667 |
| AMOT         | -0.089566667 | 0.0396       | 0.262933333  | -0.236766667 | -0.0125      |
| LOC727947    | -0.116933333 | 0.185733333  | -0.267233333 | -0.3012      | 0.2118       |
| DAGLA        | 0.016466667  | 0.087766667  | -0.092133333 | -0.0127      | 0.064733333  |
| NR1H3        | -0.634066667 | -0.109466667 | 0.319066667  | -0.5993      | -0.028833333 |
| UBA1         | -0.078533333 | -0.1567      | 0.1528       | -0.133566667 | -0.1103      |
| NOC3L        | 0.098266667  | 0.2063       | 0.017266667  | 0.020033333  | 0.100733333  |
| VOPP1        | 0.414866667  | 0.037566667  | 0.0174       | 0.3039       | 0.0281       |
| C16orf33     | 0.135433333  | 0.022233333  | -0.007966667 | 0.044066667  | 0.0186       |
| MECP2        | 0.060533333  | 0.112233333  | -0.029166667 | -0.156       | 0.140866667  |
| ARGLU1       | 0.1201       | -0.007733333 | -0.0077      | 0.134366667  | -0.106666667 |
| NECAB3       | -0.097366667 | 0.0823       | 0.0342       | -0.144133333 | -0.1229      |
| ECOP         | 0.3864       | 0.280166667  | -0.144033333 | 0.232633333  | 0.046733333  |
| GMEB2        | 0.0651       | 0.219766667  | 0.029766667  | 0.056033333  | -0.0163      |
| NT5DC1       | -0.039533333 | -0.0571      | 0.063866667  | -0.0262      | -0.0406      |
| KREMEN1      | -0.027633333 | 0.128233333  | 0.103533333  | 0.215433333  | -0.0973      |
| ABHD2        | 0.075833333  | -0.093166667 | 0.1497       | 0.0677       | -0.013333333 |

|              |              |              |              |              |              |
|--------------|--------------|--------------|--------------|--------------|--------------|
| LOC100132288 | -0.031466667 | -0.044833333 | 0.053133333  | -0.105766667 | -0.0804      |
| GIYD2        | 0.095833333  | 0.183333333  | -0.075233333 | 0.154533333  | -0.2814      |
| LOC729264    | -0.349233333 | 0.070666667  | -0.1127      | -0.374833333 | -0.001566667 |
| LOC646316    | -0.103966667 | 0.148733333  | 0.038833333  | -0.118733333 | 0.0559       |
| C16orf59     | 0.269166667  | 0.1455       | -0.0842      | 0.039566667  | -0.001566667 |
| TUT1         | 0.078533333  | 0.019833333  | 0.070166667  | -0.070233333 | 0.012966667  |
| LOC401677    | -0.394966667 | 0.1709       | -0.368033333 | -0.333766667 | -0.0214      |
| SLC25A33     | 0.094966667  | 0.1          | 0.003833333  | 0.094533333  | 0.028633333  |
| GOLPH3       | 0.245233333  | -0.168566667 | 0.094733333  | 0.1024       | -0.004433333 |
| LOC648176    | 0.0967       | 0.024733333  | 0.0907       | 0.073933333  | -0.0223      |
| LOC652815    | -0.0772      | -0.2904      | -0.1703      | -0.226166667 | -0.197833333 |
| LOC442232    | -0.1069      | 0.036866667  | -0.2905      | -0.316966667 | 0.0187       |
| LOC729535    | 0.1265       | 0.030433333  | 0.2117       | 0.193866667  | -0.089366667 |
| DEK          | 0.221733333  | 0.081633333  | -0.044933333 | 0.0532       | 0.106833333  |
| SORBS1       | -0.0413      | 0.108233333  | -0.115066667 | -0.049466667 | -0.006533333 |
| YPEL3        | -0.302233333 | -0.0304      | 0.173466667  | -0.3674      | 0.0197       |
| SORD         | -0.199633333 | 0.1635       | -0.065066667 | -0.151233333 | -0.004866667 |
| SPAG7        | -0.0632      | -0.000266667 | 0.166633333  | -0.1616      | 0.081166667  |
| ATP10A       | 0.327733333  | 0.031833333  | -0.000633333 | 0.195666667  | -0.1172      |
| FAM188A      | -0.051066667 | -0.038833333 | 0.082666667  | -0.227       | 0.0827       |
| NDUFV3       | 0.129466667  | -0.052666667 | 0.057433333  | -0.1035      | 0.078133333  |
| TM2D2        | 0.115533333  | 0.100366667  | -0.1122      | -0.108833333 | 0.007666667  |
| MGC87895     | -0.5275      | 0.3074       | -0.161633333 | -0.317       | 0.001066667  |
| PDSS1        | 0.374666667  | 0.1704       | -0.186866667 | 0.149        | 0.077466667  |
| RELB         | 0.2546       | -0.040233333 | 0.085466667  | 0.2329       | -0.065766667 |
| STK38        | 0.064366667  | 0.032233333  | -0.067066667 | -0.116433333 | -0.005566667 |
| TBL1X        | -0.024533333 | 0.070433333  | 0.325033333  | -0.247       | 0.205533333  |
| ZSWIM1       | -0.0437      | 0.036733333  | 0.0167       | -0.064966667 | -0.018766667 |
| PIGH         | -0.0537      | 0.189533333  | -0.066933333 | 0.036433333  | -0.036766667 |
| LOC728643    | 0.1114       | -0.015633333 | 0.058833333  | 0.057166667  | -0.057166667 |
| C1orf43      | -0.103733333 | -0.043833333 | 0.080133333  | -0.103866667 | -0.138233333 |
| ADCY6        | -0.0719      | -0.037633333 | 0.170366667  | -0.0895      | -0.066733333 |
| LOC728453    | 0.095866667  | -0.210666667 | 0.152233333  | -0.0567      | -0.095066667 |
| LOC441377    | -0.217533333 | 0.100066667  | -0.0606      | -0.1405      | -0.064233333 |
| TP53INP2     | -0.131266667 | -0.159966667 | 0.142166667  | -0.029033333 | -0.1771      |
| SNORD78      | 0.0393       | 0.052833333  | 0.038833333  | -0.0321      | -0.057133333 |
| TECR         | -0.078233333 | 0.0242       | 0.131233333  | -0.043633333 | -0.051       |
| NFKBIB       | 0.352166667  | 0.043766667  | -0.131233333 | 0.150366667  | 0.067833333  |
| C14orf112    | 0.022233333  | 0.114033333  | 0.0142       | -0.008333333 | 0.009766667  |
| LOC100133662 | -0.003333333 | 0.044433333  | 0.045166667  | -0.010033333 | -0.037566667 |
| WDR23        | -0.1987      | 0.084933333  | -0.022966667 | -0.029033333 | -0.1699      |
| FAM136A      | 0.241466667  | 0.1411       | -0.0951      | 0.187466667  | 0.0319       |
| GALNT3       | -0.049266667 | 0.538766667  | -0.211233333 | -0.052966667 | 0.046233333  |
| LOC729898    | -0.123833333 | 0.226066667  | -0.299966667 | -0.1213      | -0.0246      |
| PMS1         | -0.1982      | 0.0968       | 0.046733333  | -0.1637      | -0.0063      |
| LOC100129335 | -0.067633333 | 0.102266667  | -0.030833333 | -0.0822      | 0.005666667  |
| MAPRE1       | 0.351        | 0.119366667  | -0.097066667 | 0.138833333  | -0.0226      |

|              |              |              |              |              |              |
|--------------|--------------|--------------|--------------|--------------|--------------|
| C4orf27      | -0.012       | 0.076033333  | -0.0139      | -0.029633333 | -0.0783      |
| LOC728229    | -0.032033333 | 0.041166667  | 0.075366667  | 0.0465       | -0.1243      |
| ENTPD4       | 0.0179       | 0.0175       | 0.022866667  | -0.039766667 | -0.018466667 |
| OTUD1        | -0.157633333 | -0.089666667 | -0.001266667 | -0.083       | -0.1372      |
| SNORD6       | 0.0909       | 0.2502       | -0.104766667 | 0.023666667  | 0.0575       |
| LASS5        | 0.2578       | -0.107833333 | 0.020033333  | 0.083766667  | -0.040266667 |
| AKAP9        | -0.024966667 | -0.024566667 | 0.0128       | -0.094866667 | 0.0623       |
| KPNB1        | 0.2677       | 0.153033333  | -0.0139      | 0.137133333  | 0.0827       |
| LOC729852    | 0.004966667  | 0.082533333  | -0.0729      | -0.096366667 | -0.064733333 |
| SF3B2        | 0.1908       | 0.0483       | 0.1041       | 0.215733333  | -0.063066667 |
| MTCP1        | -0.1489      | -0.051833333 | -0.100933333 | -0.2275      | -0.0507      |
| LOC644790    | -0.184566667 | 0.069066667  | -0.082333333 | -0.095033333 | -0.0848      |
| ZNF266       | 0.085033333  | 0.030966667  | -0.0721      | -0.018266667 | -0.0533      |
| IFIT2        | -0.3833      | -0.057933333 | 0.238466667  | -0.166866667 | -0.1364      |
| FAM44B       | -0.006566667 | 0.044933333  | 0.004633333  | 0.022966667  | -0.094166667 |
| LOC255167    | -0.1583      | 0.651166667  | -0.2152      | -0.096533333 | 0.079166667  |
| RBM39        | 0.1339       | 0.236233333  | 0.132566667  | 0.1447       | 0.099366667  |
| LOC100133473 | 0.480066667  | 0.0727       | -0.0476      | 0.3029       | 0.003633333  |
| LOC441131    | -0.113533333 | -0.0196      | 0.1508       | -0.1399      | -0.090066667 |
| TNKS1BP1     | -0.1325      | -0.110733333 | 0.122333333  | -0.1328      | -0.074866667 |
| ZNF652       | 0.082866667  | 0.669466667  | -0.176133333 | 0.013566667  | 0.191133333  |
| DHCR24       | 0.1707       | 0.0864       | 0.0037       | 0.079133333  | 0.0714       |
| LOC647074    | -0.334266667 | 0.145766667  | -0.266866667 | -0.3458      | 0.044466667  |
| MAP4K5       | 0.03         | -0.3351      | 0.071233333  | -0.047833333 | -0.085366667 |
| CAD          | 0.362333333  | 0.0245       | 0.0472       | 0.142566667  | 0.052166667  |
| THADA        | -0.0248      | -0.0033      | 0.136766667  | -0.127033333 | 0.1332       |
| LRWD1        | 0.361833333  | 0.1389       | 0.062933333  | 0.1339       | 0.152966667  |
| LOC728612    | 0.265466667  | 0.1488       | 0.017333333  | -0.0594      | 0.256666667  |
| LOC648980    | 0.090366667  | 0.033733333  | 0.103633333  | -0.091266667 | 0.131566667  |
| RAB23        | 0.1457       | 0.037233333  | 0.1037       | -0.030166667 | 0.0037       |
| TMEM43       | -0.025333333 | -0.117433333 | -0.080166667 | -0.1283      | -0.123266667 |
| SACM1L       | -0.185466667 | 0.027866667  | 0.003        | -0.0778      | 0.0465       |
| FBXO7        | -0.0308      | 0.033666667  | 0.0138       | -0.028233333 | -0.087333333 |
| RPL18        | 0.0614       | -0.0375      | 0.0022       | -0.090233333 | -0.004633333 |
| LXN          | 0.217266667  | 0.108433333  | 0.017466667  | 0.234266667  | -0.006233333 |
| LOC649548    | -0.002333333 | 0.0227       | 0.041066667  | 0.001366667  | -0.086033333 |
| RILPL2       | 0.134133333  | 0.096        | 0.031333333  | 0.157233333  | -0.0707      |
| LOC100134209 | 0.040866667  | 0.0382       | 0.049133333  | 0.0329       | -0.0518      |
| LOC440055    | 0.047033333  | -0.106266667 | 0.012566667  | 0.008266667  | -0.235166667 |
| SGPL1        | 0.119833333  | -0.158433333 | -0.097333333 | -0.041033333 | -0.097433333 |
| GABARAP      | -0.0448      | 0.0334       | -0.0905      | -0.1032      | -0.188066667 |
| UAP1L1       | 0.0566       | -0.116633333 | -0.107166667 | -0.098366667 | -0.094833333 |
| TRIM78P      | -0.235533333 | 0.088133333  | 0.152366667  | -0.213433333 | 0.0894       |
| YARS         | -0.144033333 | -0.025066667 | -0.0799      | -0.181033333 | -0.143933333 |
| HOXB7        | -0.1312      | -0.1181      | 0.1403       | -0.113966667 | -0.076566667 |
| LOC728855    | -0.122733333 | -0.121033333 | 0.2088       | -0.0228      | -0.1271      |
| LOC392522    | -0.224066667 | -0.1717      | -0.085833333 | -0.258733333 | -0.052833333 |

|              |              |              |              |              |              |
|--------------|--------------|--------------|--------------|--------------|--------------|
| ZC3H11B      | -0.1479      | 0.063733333  | 0.143933333  | -0.073433333 | -0.029933333 |
| FKBP14       | -0.313466667 | 0.669066667  | -0.062266667 | -0.184633333 | 0.1763       |
| IVD          | 0.0567       | -0.009433333 | 0.128233333  | 0.054        | -0.1137      |
| C8orf37      | -0.160233333 | 0.498733333  | -0.1043      | -0.128066667 | 0.085533333  |
| ZNF626       | -0.0932      | 0.522166667  | -0.059633333 | -0.057933333 | 0.1635       |
| ALKBH7       | -0.221766667 | -0.051933333 | 0.190633333  | -0.220366667 | 0.028266667  |
| C10orf118    | -0.088666667 | 0.015066667  | 0.016266667  | -0.133966667 | -0.0738      |
| DGCR8        | 0.184866667  | 0.054166667  | -0.083933333 | -0.028433333 | -0.070233333 |
| LOC729500    | -0.190433333 | -0.170066667 | -0.093833333 | -0.2975      | -0.061566667 |
| C14orf132    | 0.049833333  | 0.055866667  | -0.010066667 | -0.096033333 | -0.0689      |
| PRPF38A      | 0.2178       | 0.2398       | -0.032633333 | 0.124466667  | 0.235633333  |
| BAG4         | 0.0812       | 0.182466667  | 0.3026       | 0.2883       | 0.075        |
| LOC253039    | -0.1776      | -0.2196      | 0.0213       | -0.066466667 | -0.198533333 |
| NME2         | -0.4152      | 0.258        | -0.515133333 | -0.438133333 | 0.1106       |
| PDE4C        | -0.110366667 | 0.5256       | -0.092633333 | -0.025533333 | 0.010533333  |
| TERF1        | -0.4072      | -0.056966667 | -0.057866667 | -0.3009      | -0.135433333 |
| KCTD17       | 0.134466667  | -0.037566667 | 0.063233333  | -0.068766667 | 0.027266667  |
| ABCC4        | 0.117966667  | -0.091       | -0.077166667 | -0.122733333 | 0.032533333  |
| THOC1        | 0.043966667  | 0.170033333  | 0.0933       | -0.0368      | 0.087033333  |
| PRKAR1B      | 0.118466667  | 0.0885       | 0.050766667  | 0.174433333  | -0.0318      |
| MGRN1        | 0.059666667  | -0.1329      | 0.175266667  | -0.046866667 | -0.0506      |
| VAMP1        | -0.157233333 | 0.1051       | -0.042066667 | -0.033366667 | -0.0175      |
| ZNF638       | -0.031333333 | 0.044766667  | 0.056266667  | -0.011333333 | -0.0923      |
| ALAD         | -0.008433333 | -0.1367      | 0.032066667  | -0.2508      | -0.072066667 |
| LOC442582    | 0.134033333  | 0.0517       | 0.0086       | 0.148        | -0.117933333 |
| ACP5         | -0.289866667 | -0.128933333 | 0.253633333  | -0.152233333 | -0.209366667 |
| PMF1         | 0.124733333  | 0.268933333  | -0.091133333 | 0.2608       | -0.052466667 |
| PFDN6        | -0.045533333 | 0.0488       | -0.058066667 | 0.0446       | -0.047133333 |
| LOC642828    | -0.224833333 | 0.090233333  | -0.0922      | -0.037266667 | -0.139933333 |
| ANKLE2       | 0.3037       | 0.147633333  | -0.031       | 0.263566667  | 0.0266       |
| SYNJ1        | 0.178233333  | -0.049966667 | 0.174166667  | 0.0449       | 0.1163       |
| COX6A1       | -0.076766667 | -0.119766667 | 0.124566667  | -0.060366667 | -0.075833333 |
| RAB8B        | 0.0888       | -0.271966667 | -0.058233333 | -0.122166667 | -0.043366667 |
| LOC730278    | -0.0462      | 0.015466667  | -0.0791      | -0.109866667 | -0.044866667 |
| HSPA14       | 0.327        | 0.2497       | -0.107733333 | 0.220466667  | 0.0316       |
| SLC25A12     | 0.032166667  | 0.042733333  | -0.0435      | -0.057433333 | -0.019466667 |
| REEP3        | 0.116233333  | 0.159066667  | 0.116633333  | 0.028233333  | 0.0894       |
| LOC100129522 | -0.023233333 | -0.019266667 | 0.105866667  | -0.061166667 | 0.031466667  |
| NET1         | 0.019133333  | 0.108466667  | 0.326033333  | 0.042866667  | 0.050933333  |
| IFI27L2      | -0.475766667 | 0.010733333  | 0.2502       | -0.444933333 | 0.030666667  |
| PDS5A        | 0.017233333  | 0.1492       | 0.138933333  | 0.015433333  | -0.015666667 |
| JDP2         | -0.186033333 | -0.004866667 | -0.0019      | -0.101366667 | -0.065266667 |
| UBTF         | 0.1287       | 0.015033333  | 0.1131       | 0.193266667  | -0.155666667 |
| HADHA        | -0.022466667 | -0.126666667 | -0.038866667 | -0.129766667 | -0.1002      |
| NVL          | 0.059866667  | 0.128966667  | 0.100866667  | -0.0335      | 0.081066667  |
| RPL26L1      | -0.027566667 | -0.0459      | -0.001166667 | -0.058166667 | -0.060233333 |
| C2orf63      | -0.107733333 | -0.054633333 | -0.019733333 | -0.267666667 | -0.151966667 |

|              |              |              |              |              |              |
|--------------|--------------|--------------|--------------|--------------|--------------|
| L2HGDH       | 0.176566667  | 0.187433333  | -0.032733333 | -0.022866667 | 0.106        |
| TMEM106B     | -0.144866667 | -0.1836      | -0.0058      | -0.223033333 | -0.141533333 |
| MEGF9        | -0.0322      | -0.091733333 | 0.087733333  | -0.034866667 | -0.098033333 |
| C9orf21      | 0.1724       | 0.041166667  | -0.325466667 | 0.230733333  | -0.1231      |
| LOC100129067 | -0.1458      | 0.4462       | -0.374933333 | -0.170633333 | 0.231833333  |
| MLYCD        | -0.097433333 | -0.18        | 0.0471       | -0.171666667 | -0.121133333 |
| MPHOSPH9     | 0.1823       | 0.108566667  | 0.010133333  | 0.070566667  | -0.044733333 |
| C6orf47      | -0.089566667 | -0.060766667 | 0.1329       | -0.101366667 | -0.077766667 |
| C1orf166     | 0.019766667  | -0.042633333 | -0.062833333 | -0.042633333 | -0.105033333 |
| LOC391833    | 0.023633333  | -0.049933333 | 0.002433333  | -0.094       | -0.004133333 |
| LOC647000    | 0.182566667  | -0.0108      | 0.226233333  | 0.144033333  | -0.012366667 |
| CD96         | -0.0545      | 0.006666667  | 0.257533333  | -0.175833333 | 0.055333333  |
| ETFA         | -0.1702      | 0.112766667  | 0.074766667  | -0.204433333 | 0.0305       |
| SEC23B       | -0.187666667 | 0.0381       | 0.0559       | -0.236966667 | -0.012433333 |
| RAB3IP       | -0.152833333 | -0.059333333 | 0.1521       | -0.283266667 | -0.0481      |
| PIP4K2C      | 0.063766667  | -0.0259      | -0.0872      | -0.100266667 | -0.128433333 |
| MAML1        | 0.304033333  | 0.025133333  | -0.126633333 | 0.245033333  | -0.0739      |
| GPATCH1      | 0.1339       | 0.279433333  | -0.055766667 | 0.075566667  | 0.237866667  |
| TRAF5        | 0.2037       | -0.036433333 | 0.063766667  | 0.002233333  | -0.011666667 |
| LOC647691    | 0.094433333  | 0.020933333  | 0.113666667  | -0.141933333 | 0.107366667  |
| C5orf5       | 0.0739       | 0.032        | -0.266166667 | -0.0499      | -0.0519      |
| STAG3L2      | -0.096933333 | 0.113566667  | 0.049133333  | -0.1474      | 0.024766667  |
| PPP2R5C      | -0.0589      | 0.0481       | 0.213833333  | -0.0486      | 0.046566667  |
| DENND4A      | 0.017666667  | 0.035033333  | -0.002533333 | -0.026666667 | -0.066966667 |
| AIF1         | 0.0953       | 0.0606       | 0.004366667  | 0.034633333  | -0.090466667 |
| ARHGEF11     | 0.029566667  | -0.062366667 | 0.033433333  | -0.0065      | -0.228433333 |
| ATP2B4       | -0.323166667 | -0.211066667 | 0.288966667  | -0.391566667 | -0.113033333 |
| SRPX2        | -0.242066667 | 0.035433333  | 0.561033333  | -0.1871      | -0.007666667 |
| DENND2C      | -0.038533333 | -0.095333333 | -0.102866667 | -0.039       | -0.1718      |
| LOC220686    | 0.2029       | 0.023266667  | 0.057466667  | 0.060433333  | 0.025233333  |
| LOC100130003 | 0.144133333  | 0.043266667  | 0.071233333  | 0.058766667  | 0.050033333  |
| LBX2         | -0.256933333 | -0.109433333 | 0.198        | -0.1716      | 0.0235       |
| KIAA1826     | 0.0365       | -0.097066667 | 0.190833333  | -0.004933333 | -0.043966667 |
| LAMA5        | -0.420666667 | -0.2733      | 0.496333333  | -0.248266667 | -0.194866667 |
| SLC12A8      | -0.2538      | -0.0163      | 0.026466667  | -0.255333333 | -0.207333333 |
| LOC727877    | 0.077566667  | -0.062933333 | -0.0361      | 0.008533333  | -0.156233333 |
| LOC729495    | -0.004633333 | -0.0936      | 0.124866667  | -0.1264      | 0.0134       |
| GALNS        | -0.155566667 | 0.063566667  | -0.005966667 | -0.1229      | -0.120433333 |
| LOC644739    | 0.246066667  | 0.035833333  | 0.221733333  | 0.220733333  | 0.121666667  |
| MIR886       | 0.039333333  | 0.093466667  | 0.1725       | 0.185133333  | -0.061333333 |
| SNORA65      | 0.2694       | 0.118966667  | -0.179       | 0.031533333  | 0.0386       |
| KIAA1033     | -0.1706      | -0.0445      | -0.064566667 | -0.2351      | 0.072433333  |
| LOC729920    | 0.108266667  | -0.020466667 | -0.041233333 | 0.084766667  | -0.024133333 |
| LOC100133224 | -0.229433333 | 0.034233333  | 0.1539       | -0.215266667 | -0.094833333 |
| LOC644482    | -0.2133      | 0.120433333  | -0.076466667 | -0.192066667 | 0.038266667  |
| PSMA4        | 0.006633333  | 0.101633333  | 0.1492       | 0.0997       | 0.059233333  |
| ZNF84        | -0.0721      | -0.034666667 | 0.107966667  | -0.071533333 | -0.064366667 |

|              |              |              |              |              |              |
|--------------|--------------|--------------|--------------|--------------|--------------|
| OSBPL6       | 0.179733333  | -0.057666667 | -0.1667      | -0.016066667 | -0.140766667 |
| RPPH1        | 0.0988       | 0.269933333  | 0.034833333  | -0.039766667 | 0.0181       |
| HIST1H3F     | 0.0379       | 0.298833333  | -0.104766667 | -0.010466667 | 0.085233333  |
| RELL1        | 0.149566667  | 0.1752       | 0.0501       | 0.026233333  | 0.099266667  |
| CDCA7        | 0.364666667  | 0.171966667  | -0.0812      | 0.232166667  | 0.034533333  |
| LOC389322    | 0.3424       | 0.267533333  | -0.1381      | 0.182333333  | 0.131333333  |
| TTC9C        | -0.080366667 | 0.030666667  | 0.0091       | -0.113733333 | -0.090966667 |
| SPCS1        | 0.058666667  | -0.1214      | 0.077333333  | 0.055466667  | -0.149666667 |
| ENDOD1       | -0.000133333 | 0.0306       | -0.033766667 | -0.245466667 | 0.085266667  |
| ANKRD26      | -0.086066667 | 0.0468       | 0.083466667  | -0.033566667 | 0.0372       |
| C1orf131     | 0.289033333  | 0.029        | -0.128866667 | 0.1089       | 0.0048       |
| SMYD4        | 0.242433333  | 0.0751       | 0.001566667  | 0.078133333  | -0.0425      |
| LOC100131387 | 0.0007       | -0.0078      | -0.110566667 | -0.007866667 | -0.054766667 |
| CCDC53       | -0.1697      | -0.097333333 | 0.155766667  | -0.1195      | -0.0893      |
| C14orf147    | -0.082266667 | -0.075166667 | 0.0305       | -0.204366667 | -0.102266667 |
| OGT          | -0.149066667 | 0.086366667  | -0.0676      | -0.095733333 | -0.234033333 |
| TMEM181      | -0.085833333 | 0.012        | 0.184166667  | -0.0712      | 0.002466667  |
| NAGLU        | -0.144766667 | -0.276633333 | 0.032266667  | -0.300833333 | -0.256233333 |
| LOC100129055 | -0.180266667 | 0.4757       | -0.249533333 | -0.152333333 | 0.149733333  |
| DCK          | 0.470866667  | -0.032066667 | -0.013466667 | 0.165266667  | -0.012433333 |
| ARMC6        | 0.203733333  | 0.096666667  | -0.051366667 | 0.0878       | 0.009666667  |
| NETO2        | 0.490733333  | 0.1697       | 0.1385       | 0.167766667  | 0.1794       |
| ZNHIT2       | 0.04         | -0.0021      | -0.055466667 | -0.169633333 | 0.0192       |
| DNAJC4       | -0.266766667 | -0.067466667 | 0.230933333  | -0.223766667 | -0.094333333 |
| WWTR1        | -0.074266667 | 0.180966667  | 0.400033333  | -0.069566667 | 0.141133333  |
| APLP2        | 0.1065       | -0.011033333 | -0.0809      | 0.0934       | -0.100133333 |
| MKI67IP      | 0.2506       | 0.029166667  | -0.0476      | 0.112266667  | -0.047666667 |
| MUC1         | -0.254633333 | -0.108366667 | 0.2854       | -0.2147      | -0.110666667 |
| FAM98B       | 0.225466667  | 0.048166667  | -0.0516      | 0.166866667  | -0.0065      |
| FCAR         | -0.114433333 | 0.644066667  | 0.025533333  | -0.019466667 | 0.247333333  |
| CDK5R1       | 0.292466667  | 0.1099       | 0.104533333  | 0.157033333  | -0.066266667 |
| N4BP1        | -0.0573      | -0.034933333 | 0.0863       | -0.2095      | -0.150133333 |
| TPBG         | -0.0372      | 0.041033333  | 0.1156       | -0.035566667 | 0.0344       |
| LOC728499    | 0.166333333  | 0.0193       | 0.138        | -0.0356      | -0.050333333 |
| PPP1R14B     | 0.128133333  | 0.0669       | -0.149433333 | -0.106966667 | 0.1142       |
| C20orf199    | 0.005666667  | -0.240966667 | -0.119366667 | -0.070666667 | -0.2338      |
| LUZP1        | 0.271        | -0.031633333 | -0.0033      | 0.1095       | -0.128866667 |
| PIP5K2B      | -0.066233333 | 0.7219       | -0.111066667 | -0.012433333 | 0.108966667  |
| PTP4A1       | 0.2932       | 0.091333333  | -0.058566667 | 0.141033333  | 0.053966667  |
| GPRIN1       | 0.429633333  | 0.0831       | -0.151433333 | 0.166033333  | -0.038933333 |
| PSME4        | -0.019933333 | 0.037633333  | 0.2068       | -0.085966667 | 0.077566667  |
| LOC728774    | -0.446233333 | 0.263466667  | -0.4296      | -0.324433333 | 0.011266667  |
| LEPRE1       | -0.054766667 | 0.058833333  | -0.0795      | -0.035633333 | -0.132233333 |
| CCDC135      | 0.1004       | 0.019333333  | 0.0803       | 0.102233333  | -0.105066667 |
| ANKRD13C     | 0.178466667  | 0.0116       | -0.1886      | 0.168733333  | -0.111966667 |
| IRF7         | -0.121133333 | 0.096333333  | 0.130633333  | -0.0942      | 0.065        |
| UNC119B      | 0.069433333  | 0.010166667  | -0.094766667 | 0.002566667  | -0.2328      |



|              |              |              |              |              |              |
|--------------|--------------|--------------|--------------|--------------|--------------|
| OGDH         | 0.003466667  | 0.106966667  | -0.0146      | -0.095766667 | -0.047266667 |
| PSD3         | -0.091333333 | 0.025566667  | 0.225433333  | -0.112833333 | -0.0559      |
| SNAP47       | -0.048133333 | 0.024433333  | 0.142466667  | -0.075       | -0.032433333 |
| TMED10P      | -0.0868      | -0.083833333 | -0.009266667 | -0.0966      | -0.086       |
| MAD1L1       | 0.158766667  | 0.0918       | 0.0751       | 0.019466667  | -0.024366667 |
| C1orf57      | -0.1935      | 0.0582       | -0.022933333 | -0.061433333 | -0.158266667 |
| CCAR1        | -0.044166667 | 0.023466667  | 0.032833333  | -0.0798      | 0.046033333  |
| RPS26L       | 0.0614       | 0.092        | -0.066033333 | -0.062733333 | 0.021366667  |
| LOC100132652 | -0.000533333 | 0.033833333  | -0.0975      | -0.039633333 | -0.1375      |
| RPL23AP7     | -0.137133333 | 0.085333333  | -0.179066667 | -0.062933333 | -0.036066667 |
| LOC100131323 | -0.011266667 | 0.159333333  | -0.1292      | 0.013833333  | -0.011066667 |
| CSNK1G3      | 0.192466667  | 0.029733333  | 0.097033333  | 0.0455       | 0.238833333  |
| RBM6         | 0.035833333  | 0.1273       | -0.008433333 | -0.063333333 | -0.0475      |
| HLA-E        | 0.073433333  | -0.213733333 | 0.1407       | -0.032466667 | -0.080266667 |
| ZNF318       | 0.0225       | -0.0722      | 0.024433333  | 0.026233333  | -0.224166667 |
| LOC731779    | 0.128033333  | -0.0635      | 0.098966667  | 0.0106       | -0.117566667 |
| CCDC120      | -0.0352      | -0.0365      | -0.0162      | -0.030366667 | -0.138333333 |
| RPS26P11     | 0.135533333  | 0.1224       | -0.0079      | 0.050766667  | 0.1016       |
| NIP7         | 0.3304       | 0.019333333  | 0.0002       | 0.204        | -0.0173      |
| RWDD3        | -0.0713      | -0.107566667 | 0.0849       | -0.148566667 | 0.039033333  |
| SSH2         | 0.0628       | -0.070066667 | 0.221766667  | 0.038333333  | -0.103633333 |
| DHRS7B       | -0.063566667 | 0.133333333  | 0.036        | -0.0781      | 0.028833333  |
| LOC441907    | 0.072366667  | 0.264333333  | -0.101866667 | -0.098266667 | 0.214733333  |
| SNX5         | 0.353633333  | -0.000766667 | -0.013233333 | 0.22         | -0.027066667 |
| ST6GAL1      | -0.2378      | -0.1164      | 0.418033333  | -0.4113      | -0.017266667 |
| PRKCQ        | 0.007266667  | 0.047066667  | -0.069433333 | -0.0316      | -0.0864      |
| LOC728179    | -0.349133333 | 0.261333333  | -0.2877      | -0.2956      | 0.090233333  |
| ZSCAN2       | -0.154166667 | 0.051        | -0.087966667 | -0.150766667 | -0.134466667 |
| HIST1H2BH    | 0.2035       | 0.022433333  | 0.0222       | 0.0059       | 0.0403       |
| KIAA1467     | -0.0181      | 0.017766667  | 0.181933333  | 0.0292       | -0.059566667 |
| RPS6KB2      | -0.068066667 | 0.1817       | -0.007866667 | -0.099733333 | 0.020733333  |
| PDHB         | -0.007033333 | -0.0954      | 0.1056       | -0.1718      | 0.030033333  |
| CHAF1B       | 0.3196       | -0.003133333 | 0.051266667  | 0.083966667  | 0.0183       |
| LOC729780    | -0.007833333 | 0.140133333  | -0.061533333 | -0.1066      | 0.0609       |
| EXD2         | -0.066866667 | -0.0812      | -0.002333333 | -0.063233333 | -0.056266667 |
| FPR1         | 0.2571       | 0.116333333  | -0.016933333 | -0.003133333 | 0.005933333  |
| NOMO3        | 0.296366667  | -0.0508      | 0.055833333  | 0.101966667  | -0.115133333 |
| LOC401010    | 0.246766667  | 0.1454       | -0.170266667 | 0.067033333  | 0.139033333  |
| MBTPS2       | 0.0766       | -0.058366667 | -0.002733333 | -0.078833333 | -0.0171      |
| LOC643035    | -0.0873      | 0.057366667  | -0.010566667 | -0.1284      | -0.128833333 |
| SNORA70      | 0.3279       | 0.199333333  | -0.144466667 | 0.062533333  | 0.1037       |
| ZNF680       | 0.103033333  | -0.118366667 | 0.094666667  | 0.018566667  | -0.103466667 |
| LOC100131868 | -0.009366667 | 0.026433333  | 0.0486       | 0.0879       | -0.146133333 |
| PLA2G2C      | 0.000433333  | 0.0575       | 0.0223       | 0.041833333  | -0.107233333 |
| LOC100133233 | -0.0485      | 0.5337       | -0.149266667 | -0.072       | 0.090033333  |
| MAP2K5       | -0.3115      | -0.0961      | 0.274566667  | -0.2917      | -0.1253      |
| DAPP1        | -0.162533333 | 0.463866667  | -0.1849      | -0.192133333 | 0.094233333  |

|              |              |              |              |              |              |
|--------------|--------------|--------------|--------------|--------------|--------------|
| CEP27        | -0.049733333 | 0.5939       | -0.168666667 | -0.0951      | 0.303        |
| NKIRAS2      | 0.012633333  | -0.055433333 | 0.1997       | 0.037        | -0.077866667 |
| LOC645899    | -0.060533333 | -0.0124      | -0.016666667 | -0.049433333 | -0.124       |
| LOC650759    | 0.0728       | 0.1216       | 0.014766667  | 0.054133333  | 0.049933333  |
| FCRLA        | -0.021266667 | -0.230666667 | 0.603466667  | -0.1142      | -0.069266667 |
| LOC341784    | 0.057733333  | 0.292433333  | 0.106266667  | 0.122866667  | 0.081466667  |
| FUT6         | -0.044433333 | 0.5528       | -0.080666667 | 0.005433333  | 0.247733333  |
| CAST         | 0.020666667  | 0.088233333  | 0.135266667  | 0.029266667  | 0.2461       |
| APBB1IP      | -0.0267      | 0.099733333  | 0.187666667  | 0.025333333  | -0.057633333 |
| FADS1        | 0.0441       | -0.0306      | 0.1508       | 0.073633333  | -0.118833333 |
| EPHA10       | -0.049033333 | 0.034266667  | 0.182966667  | -0.0156      | -0.0308      |
| DLD          | -0.0531      | -0.018933333 | -0.029933333 | -0.1392      | -0.0208      |
| GABPA        | 0.1492       | -0.189466667 | 0.080966667  | 0.024333333  | -0.0004      |
| BTN3A1       | -0.0885      | -0.1376      | 0.1666       | -0.063933333 | -0.1207      |
| C1orf59      | -0.205833333 | 0.053166667  | -0.103966667 | -0.333033333 | -0.006833333 |
| C1orf35      | 0.252033333  | 0.076466667  | -0.046733333 | 0.172366667  | 0.030566667  |
| LOC100129028 | -0.132266667 | 0.100966667  | 0.0232       | -0.174866667 | -0.005166667 |
| DPYSL3       | 0.2329       | 0.152533333  | -0.3059      | 0.049566667  | 0.024066667  |
| OSBPL5       | 0.122833333  | -0.1439      | 0.197066667  | -0.070833333 | 0.064633333  |
| HNRPA1P4     | 0.286433333  | 0.0874       | -0.008733333 | 0.1459       | -0.015766667 |
| SSNA1        | 0.0814       | 0.0363       | 0.034066667  | 0.027133333  | 0.128133333  |
| GJC2         | -0.2352      | 0.006633333  | 0.257933333  | -0.284466667 | 0.118366667  |
| EIF5B        | 0.139866667  | 0.162566667  | 0.053366667  | 0.082        | -0.002033333 |
| BTBD1        | 0.1507       | 0.162966667  | 0.0434       | 0.138933333  | 0.070666667  |
| TRIAP1       | 0.000933333  | 0.096833333  | -0.152333333 | -0.0166      | -0.077733333 |
| PPP2R5A      | -0.0186      | 0.037633333  | 0.041466667  | -0.029433333 | -0.069866667 |
| MTFMT        | 0.179333333  | 0.124233333  | -0.0963      | 0.034666667  | 0.049033333  |
| FAM173A      | -0.2241      | 0.004766667  | 0.0965       | -0.178       | 0.030233333  |
| MCHR2        | -0.047366667 | 0.259566667  | -0.0859      | -0.0778      | 0.046733333  |
| LAMB2        | -0.4298      | -0.082733333 | 0.135233333  | -0.3339      | -0.117966667 |
| C14orf179    | -0.183266667 | -0.0281      | 0.064466667  | -0.141633333 | -0.126166667 |
| MGC70857     | -0.246733333 | 0.036766667  | 0.174966667  | -0.1552      | -0.069033333 |
| LOC347544    | 0.0415       | -0.050133333 | 0.132433333  | 0.014166667  | -0.0419      |
| C14orf79     | -0.103666667 | -0.1029      | 0.093966667  | -0.162666667 | -0.100733333 |
| LOC646547    | -0.1573      | 0.352266667  | -0.067666667 | -0.022633333 | 0.076166667  |
| SNN          | 0.010933333  | -0.0585      | -0.0262      | -0.109433333 | -0.040366667 |
| FLJ20254     | 0.0202       | 0.0284       | 0.068933333  | -0.0828      | -0.014133333 |
| LOC100127913 | 0.064866667  | -0.049033333 | -0.036933333 | -0.080233333 | -0.148333333 |
| MUDENG       | -0.099933333 | -0.041833333 | -0.0052      | -0.037966667 | -0.0787      |
| RNF170       | -0.1689      | -0.068433333 | 0.081933333  | -0.280533333 | 0.0476       |
| LOC641768    | -0.0327      | 0.065666667  | -0.078533333 | -0.0236      | 0.0251       |
| PBX2         | -0.013766667 | 0.0568       | 0.1968       | -0.0973      | -0.003566667 |
| DGCR2        | -0.068966667 | -0.0702      | 0.105666667  | -0.138166667 | -0.108666667 |
| LOC642458    | 0.0769       | 0.193        | 0.184566667  | 0.155233333  | -0.0057      |
| ELP2         | 0.0446       | 0.0277       | 0.084066667  | -0.053966667 | -0.074733333 |
| SS18L2       | 0.261633333  | 0.011766667  | -0.0321      | 0.061166667  | 0.003366667  |
| TCTN1        | -0.224       | -0.054633333 | 0.058733333  | -0.247933333 | -0.109733333 |

|              |              |              |              |              |              |
|--------------|--------------|--------------|--------------|--------------|--------------|
| PIK3R1       | 0.0059       | -0.0671      | -0.059266667 | -0.139366667 | -0.1386      |
| IL10         | -0.207833333 | 0.522566667  | -0.2919      | -0.3082      | 0.1307       |
| CDK7         | 0.133866667  | 0.003766667  | 0.108266667  | 0.021833333  | -0.0817      |
| LOC100130291 | -0.432766667 | 0.024933333  | 0.0168       | -0.4711      | -0.038366667 |
| EXOC3        | -0.083733333 | -0.1598      | 0.063966667  | -0.1611      | -0.137133333 |
| ILF2         | 0.3134       | -0.013566667 | 0.002033333  | 0.124333333  | -0.063566667 |
| LMF2         | 0.245066667  | 0.0197       | -0.086233333 | 0.175966667  | -0.075966667 |
| LOC728666    | 0.391566667  | 0.056366667  | 0.1227       | 0.258566667  | 0.1016       |
| LOC441089    | 0.092033333  | 0.084166667  | -0.013       | 0.006733333  | 0.006666667  |
| HNRNPA1L2    | 0.1196       | 0.173966667  | -0.1633      | 0.076366667  | 0.082966667  |
| TMEM209      | 0.255766667  | -0.079166667 | -0.062966667 | 0.038366667  | -0.017066667 |
| LOC100129379 | -0.107666667 | 0.020133333  | -0.1798      | -0.194466667 | -0.120566667 |
| ACTR1B       | 0.013866667  | -0.046966667 | 0.091733333  | -0.055866667 | -0.204966667 |
| LOC644949    | -0.245033333 | 0.5431       | -0.119833333 | -0.284266667 | 0.3544       |
| ZNF557       | -0.224433333 | 0.551666667  | -0.065166667 | -0.0474      | 0.179633333  |
| NSUN6        | -0.016766667 | 0.135333333  | -0.0215      | -0.106166667 | 0.012833333  |
| LOC100128269 | -0.034133333 | 0.0748       | -0.022733333 | -0.105433333 | 0.0995       |
| TMEM126A     | -0.1514      | -0.029933333 | 0.080533333  | -0.110866667 | -0.052733333 |
| NRD1         | 0.016533333  | -0.028233333 | -0.009733333 | 0.0118       | -0.1099      |
| MTG1         | 0.118733333  | 0.152033333  | 0.009433333  | 0.030733333  | 0.064133333  |
| RNF160       | 0.0933       | -0.242766667 | 0.0957       | -0.095266667 | 0.0252       |
| HPCAL1       | 0.0852       | -0.007166667 | 0.345433333  | -0.137233333 | 0.1009       |
| NUDT16L1     | 0.0424       | 0.113733333  | 0.020933333  | 0.040066667  | 0.081766667  |
| ZNF692       | 0.170233333  | 0.038633333  | 0.008266667  | -0.035633333 | -0.047033333 |
| LOC641844    | -0.032       | 0.010033333  | -0.0688      | -0.1764      | -0.092866667 |
| LOC643960    | -0.2539      | 0.131566667  | -0.2562      | -0.3112      | 0.060933333  |
| ZWILCH       | 0.2742       | 0.100733333  | -0.003133333 | 0.129466667  | 0.0739       |
| LFNG         | 0.039        | 0.125466667  | 0.1489       | -0.048166667 | -0.067333333 |
| SUMO1P3      | -0.121033333 | 0.131633333  | -0.088566667 | -0.182633333 | 0.000366667  |
| ARNT         | -0.082333333 | 0.0714       | 0.0269       | -0.091033333 | -0.0484      |
| MIOS         | 0.081933333  | 0.1766       | -0.023766667 | 0.1082       | -0.047166667 |
| RNF115       | -0.037633333 | 0.011366667  | -0.0145      | -0.047733333 | -0.091233333 |
| MSI2         | -0.200166667 | 0.050266667  | 0.3288       | -0.1662      | 0.022333333  |
| TDRD1        | -0.1968      | 0.623633333  | -0.028       | 0.0317       | 0.150233333  |
| LOC100128425 | 0.153        | -0.052233333 | 0.2244       | 0.1724       | -0.060333333 |
| EBAG9        | -0.0268      | -0.053       | -0.0038      | -0.1051      | -0.031633333 |
| TOR1A        | 0.032233333  | -0.0142      | 0.099366667  | -0.106966667 | -0.0879      |
| RBL2         | -0.045833333 | -0.0237      | 0.1004       | -0.070166667 | -0.012866667 |
| KCNS3        | -0.058066667 | 0.079166667  | -0.1477      | -0.2308      | -0.0675      |
| LOC440704    | -0.2193      | 0.600566667  | -0.1199      | -0.0569      | 0.053366667  |
| ARHGAP17     | 0.145666667  | -0.1249      | -0.026133333 | -0.017766667 | -0.113566667 |
| HEATR1       | 0.156233333  | 0.227666667  | -0.059133333 | 0.005466667  | 0.0425       |
| LOC729313    | -0.1447      | 0.287766667  | -0.142933333 | -0.152433333 | 0.200466667  |
| LIPA         | -0.260333333 | 0.0708       | 0.146666667  | -0.207366667 | -0.010366667 |
| LOC728937    | 0.0478       | 0.1935       | -0.006533333 | 0.020766667  | 0.019433333  |
| ZNF514       | -0.124933333 | -0.115033333 | 0.043433333  | -0.165066667 | -0.0667      |
| LOC158160    | -0.0787      | 0.286666667  | 0.1432       | 0.059666667  | 0.1178       |

|              |              |              |              |              |              |
|--------------|--------------|--------------|--------------|--------------|--------------|
| CD63         | -0.2147      | 0.002333333  | 0.195866667  | -0.140333333 | -0.146066667 |
| COG7         | 0.035766667  | -0.0001      | 0.003833333  | 0.0157       | -0.0909      |
| GOLGA8B      | -0.161566667 | -0.059066667 | 0.0697       | -0.233133333 | -0.124866667 |
| MGC2752      | 0.1593       | -0.028       | 0.2573       | 0.237033333  | -0.064333333 |
| LOC100131786 | -0.127       | 0.629        | -0.220633333 | -0.0571      | 0.195833333  |
| NFAT5        | -0.081833333 | 0.032966667  | 0.308666667  | -0.056133333 | -0.074433333 |
| LOC645233    | 0.1425       | -0.016666667 | 0.095166667  | 0.048866667  | 0.003066667  |
| KIF3B        | 0.089366667  | 0.0156       | -0.097533333 | 0.053333333  | -0.2334      |
| SURF6        | 0.2716       | 0.0158       | -0.081366667 | 0.0631       | -0.044533333 |
| LOC728324    | 0.101766667  | 0.070966667  | 0.044733333  | 0.1316       | -0.064133333 |
| MYST3        | 0.140966667  | -0.0242      | -0.068233333 | 0.050166667  | -0.1671      |
| RHOBTB3      | -0.492233333 | -0.191733333 | 0.1139       | -0.3645      | -0.216033333 |
| FUBP3        | 0.215933333  | -0.0527      | 0.001533333  | 0.112466667  | -0.033066667 |
| GALNT11      | 0.128366667  | -0.028266667 | 0.0002       | -0.044466667 | -0.053533333 |
| POLR2E       | -0.022533333 | 0.1436       | 0.109633333  | 0.040066667  | 0.098633333  |
| HSD17B12     | 0.007033333  | -0.1106      | 0.167166667  | -0.106533333 | -0.006166667 |
| C7orf44      | 0.0027       | 0.0387       | 0.281266667  | -0.0259      | 0.061233333  |
| C1orf218     | -0.138666667 | -0.302366667 | 0.134766667  | -0.3004      | -0.052066667 |
| PFKL         | 0.026466667  | -0.127333333 | 0.162466667  | -0.151333333 | -0.010266667 |
| PRMT2        | -0.1304      | 0.069333333  | -0.0722      | -0.141933333 | -0.0073      |
| LOC643905    | -0.012333333 | -0.019233333 | 0.0362       | -0.171066667 | -0.036466667 |
| LOC100129543 | 0.015633333  | -0.139333333 | -0.065666667 | -0.209333333 | 0.049        |
| LOC400506    | 0.2186       | -0.023666667 | 0.0737       | 0.0257       | 0.0136       |
| ZFX          | 0.1859       | 0.100133333  | -0.1447      | -0.006666667 | -0.019366667 |
| FAM101B      | 0.256966667  | 0.0088       | -0.054433333 | 0.000533333  | 0.082266667  |
| IFNAR2       | -0.031333333 | -0.076266667 | 0.171066667  | -0.092266667 | -0.052633333 |
| LOC100134407 | 0.278266667  | -0.050966667 | 0.0469       | 0.039233333  | 0.060833333  |
| NDUFS5       | -0.084066667 | 0.043533333  | 0.1137       | 0.0357       | -0.055066667 |
| ARMC5        | 0.231366667  | 0.1183       | -0.013433333 | 0.1806       | 0.022066667  |
| PPP6C        | 0.1031       | 0.076366667  | 0.018733333  | 0.044        | -0.057666667 |
| LZIC         | 0.1163       | 0.2542       | 0.0559       | 0.122366667  | 0.167733333  |
| RCCD1        | 0.0298       | 0.0768       | -0.148833333 | -0.0648      | -0.104666667 |
| COX7C        | -0.039866667 | -0.025966667 | 0.0456       | -0.095966667 | -0.064866667 |
| SNHG3-RCC1   | 0.5317       | 0.093333333  | -0.139066667 | 0.279066667  | 0.008966667  |
| NUDT22       | -0.3756      | -0.0878      | 0.324766667  | -0.2801      | -0.1213      |
| FAM96A       | 0.030866667  | 0.035266667  | 0.037633333  | -0.002766667 | -0.056533333 |
| SNRNP35      | -0.018033333 | 0.284266667  | 0.091933333  | -0.023366667 | 0.0549       |
| LOC648000    | -0.1347      | 0.046933333  | 0.035433333  | -0.0357      | -0.0807      |
| TNFAIP6      | -0.0399      | 0.0012       | 0.093766667  | -0.084466667 | -0.042866667 |
| PAQR4        | 0.404266667  | -0.055033333 | 0.065766667  | 0.0468       | 0.088533333  |
| ZNF611       | 0.0244       | 0.007966667  | -0.029333333 | -0.046033333 | 0.0437       |
| HEXIM1       | 0.023        | 0.098333333  | 0.052233333  | -0.113366667 | 0.059333333  |
| POLR2F       | 0.182        | -0.023133333 | 0.148666667  | 0.124466667  | -0.016466667 |
| TBCE         | 0.2167       | 0.000866667  | 0.025133333  | 0.039733333  | 0.027466667  |
| SETBP1       | -0.050866667 | -0.024366667 | 0.007233333  | -0.166166667 | -0.066666667 |
| SCRIB        | 0.053066667  | 0.118433333  | 0.0793       | -0.075733333 | 0.097133333  |
| FLJ44342     | 0.014533333  | 0.103133333  | 0.0716       | -0.005866667 | -0.086       |

|              |              |              |              |              |              |
|--------------|--------------|--------------|--------------|--------------|--------------|
| ANKRD32      | 0.253533333  | 0.140166667  | -0.061966667 | 0.245533333  | -0.0251      |
| STAU1        | 0.2069       | 0.122466667  | 0.069        | 0.047966667  | 0.012166667  |
| LOC645968    | -0.648133333 | 0.1341       | -0.177933333 | -0.456033333 | -0.075133333 |
| BTF3         | 0.279366667  | 0.110633333  | -0.0391      | 0.2233       | 0.004        |
| AKAP7        | 0.1149       | -0.054733333 | -0.1134      | -0.028766667 | -0.136833333 |
| AFG3L1       | 0.3829       | 0.118266667  | 0.003633333  | 0.280966667  | -0.047133333 |
| GTF2F1       | 0.19         | -0.004666667 | -0.045633333 | 0.0502       | -0.0252      |
| GDI1         | 0.0024       | 0.0435       | 0.122566667  | -0.004633333 | -0.0918      |
| RNF41        | -0.034533333 | -0.113633333 | 0.0634       | -0.036       | -0.1605      |
| C1orf135     | 0.554933333  | 0.183        | -0.115433333 | 0.424033333  | 0.007533333  |
| RPS6KA3      | 0.122366667  | -0.081       | 0.028133333  | -0.0095      | 0.0275       |
| PKN1         | -0.065233333 | 0.015733333  | 0.095866667  | -0.1104      | -0.126533333 |
| ZNF561       | 0.0425       | 0.131366667  | -0.056566667 | -0.061333333 | 0.003333333  |
| ANAPC1       | 0.1479       | 0.076933333  | 0.074433333  | 0.017833333  | -0.040933333 |
| CLCN6        | -0.175866667 | 0.020466667  | 0.0209       | -0.247366667 | -0.187166667 |
| CNOT10       | 0.1801       | -0.020466667 | 0.0777       | 0.015366667  | -0.074533333 |
| FEZ1         | -0.193833333 | -0.084966667 | 0.225766667  | -0.296033333 | -0.1227      |
| LOC644544    | 0.109        | 0.011466667  | -0.0341      | 0.020766667  | -0.065833333 |
| LOC641750    | -0.6545      | 0.404733333  | -0.732966667 | -0.713533333 | 0.148566667  |
| C12orf35     | 0.0509       | -0.008866667 | -0.004633333 | -0.153833333 | 0.016766667  |
| LOC645231    | -0.545533333 | 0.1841       | -0.2741      | -0.344833333 | -0.078266667 |
| ARL16        | -0.047466667 | 0.516533333  | -0.026466667 | -0.139833333 | 0.182933333  |
| LOC647886    | 0.176233333  | 0.013833333  | -0.0755      | -0.1043      | 0.0258       |
| LOC100132773 | 0.028        | -0.0871      | 0.128433333  | -0.010166667 | 0.024833333  |
| C16orf62     | -0.215633333 | 0.0372       | 0.116833333  | -0.2097      | 0.009266667  |
| MGC57346     | -0.061533333 | 0.006966667  | 0.075633333  | -0.1526      | -0.013066667 |
| PMS2L2       | -0.073733333 | 0.043066667  | -0.1682      | -0.1415      | -0.0818      |
| TTL7         | 0.015566667  | -0.1202      | -0.004466667 | -0.070533333 | -0.1301      |
| LOC642892    | 0.054266667  | 0.002433333  | 0.013366667  | -0.032233333 | -0.034033333 |
| LOC100131608 | 0.120233333  | 0.010933333  | 0.015633333  | 0.0581       | -0.051966667 |
| LOC728576    | 0.046133333  | 0.004666667  | 0.054033333  | 0.0395       | -0.051833333 |
| SPRR2D       | 0.112833333  | 0.1562       | 0.010266667  | -0.0226      | -0.0089      |
| LOC653242    | -0.079766667 | -0.050966667 | 0.085966667  | -0.008566667 | -0.166066667 |
| LOC643831    | 0.033        | 0.150466667  | -0.080833333 | 0.099966667  | -0.001866667 |
| RPE          | 0.011066667  | 0.162366667  | 0.0032       | -0.016133333 | 0.049833333  |
| TFAP4        | 0.374833333  | -0.121766667 | 0.087433333  | 0.165        | 0.072166667  |
| LOC642852    | -0.002333333 | 0.0157       | 0.013533333  | -0.0354      | -0.0674      |
| LOC653297    | -0.074733333 | -0.066466667 | 0.084866667  | -0.17        | 0.0698       |
| LOC642357    | 0.054833333  | -0.117666667 | 0.2097       | -0.0035      | -0.040333333 |
| AKT3         | -0.038366667 | 0.329866667  | 0.147933333  | 0.031733333  | 0.1355       |
| FNTB         | -0.043533333 | 0.108366667  | 0.026233333  | -0.066633333 | 0.026333333  |
| UBA3         | -0.057633333 | 0.028033333  | 0.144866667  | 0.026966667  | 0.004933333  |
| AKR7A2       | -0.1837      | -0.099633333 | 0.099933333  | -0.253933333 | -0.055833333 |
| PRPF19       | 0.231966667  | 0.0307       | -0.0814      | 0.0808       | -0.0243      |
| PHF21A       | -0.556933333 | -0.140266667 | 0.216866667  | -0.500033333 | -0.156633333 |
| NUBP2        | 0.059766667  | 0.056333333  | 0.171566667  | 0.002133333  | -0.0068      |
| RTKN         | -0.162833333 | -0.1491      | 0.135033333  | -0.395133333 | -0.041333333 |

|              |              |              |              |              |              |
|--------------|--------------|--------------|--------------|--------------|--------------|
| LOC644363    | 0.1653       | 0.1968       | 0.0618       | 0.2117       | 0.061333333  |
| C21orf30     | 0.062566667  | 0.0536       | 0.011766667  | 0.0154       | -0.1724      |
| FAM126A      | 0.1519       | -0.0058      | 0.034633333  | 0.083933333  | -0.028       |
| VPS24        | 0.0448       | -0.422866667 | 0.028833333  | -0.075933333 | -0.0171      |
| LOC100129552 | 0.0728       | 0.138933333  | -0.117166667 | 0.038766667  | 0.080133333  |
| KCTD3        | 0.1074       | 0.129166667  | 0.1471       | 0.145133333  | -0.0124      |
| PHF17        | 0.207766667  | 0.042733333  | -0.036133333 | 0.104233333  | -0.005066667 |
| PTDSS2       | 0.019233333  | 0.041166667  | 0.0927       | -0.165266667 | 0.010533333  |
| CENPE        | 0.212366667  | 0.1266       | 0.022266667  | 0.271733333  | -0.101366667 |
| CCDC45       | 0.072866667  | 0.0384       | -0.082766667 | -0.119366667 | -0.142633333 |
| LOC100133876 | 0.112633333  | -0.009933333 | -0.0222      | -0.1004      | 0.027033333  |
| CCDC25       | -0.028833333 | 0.0633       | -0.054633333 | -0.136066667 | -0.148366667 |
| CDKN2D       | 0.175866667  | 0.190233333  | 0.2296       | 0.1935       | 0.031266667  |
| LOC100132658 | -0.066533333 | 0.024933333  | -0.073366667 | -0.0534      | -0.095633333 |
| ZKSCAN2      | 0.1128       | 0.063933333  | 0.062566667  | -0.062466667 | -0.031333333 |
| ZNF259       | 0.197766667  | -0.016833333 | 0.076866667  | 0.0062       | 0.0673       |
| CAT          | -0.581866667 | -0.028866667 | 0.0949       | -0.453       | -0.1876      |
| LOC100128805 | 0.409266667  | 0.099        | -0.169333333 | 0.122133333  | 0.0445       |
| ACP2         | -0.2057      | -0.1587      | 0.2136       | -0.217933333 | -0.1774      |
| ANKRD7       | 0.037533333  | 0.072        | 0.004733333  | -0.060866667 | -0.027266667 |
| LIAS         | 0.143866667  | 0.149666667  | -0.219966667 | 0.056133333  | -0.151366667 |
| LOC400750    | -0.2445      | 0.135766667  | -0.109266667 | -0.235166667 | 0.0339       |
| SNRPG        | 0.1404       | 0.082266667  | 0.066166667  | 0.046166667  | 0.044133333  |
| LOC100132526 | -0.0869      | 0.562833333  | -0.098466667 | -0.054433333 | 0.1901       |
| ANKFY1       | 0.057633333  | -0.123566667 | 0.135366667  | -0.1151      | -0.082766667 |
| IRF4         | 0.106766667  | 0.054966667  | 0.015533333  | 0.045566667  | 0.074466667  |
| TOB2         | 0.057866667  | 0.050966667  | 0.0723       | 0.110466667  | -0.175033333 |
| HOXD8        | -0.029066667 | -0.041766667 | 0.0538       | -0.139       | -0.081333333 |
| ZNF425       | -0.181633333 | 0.011833333  | -0.056733333 | -0.215366667 | -0.115066667 |
| LOC389141    | -0.0777      | -0.073166667 | 0.093066667  | -0.0958      | -0.0336      |
| PPBP         | -0.082866667 | 0.003        | -0.082833333 | -0.056266667 | -0.157033333 |
| U1SNRNPBP    | 0.2585       | 0.0337       | 0.1594       | 0.040466667  | 0.062366667  |
| LOC441032    | -0.3311      | 0.240933333  | -0.3436      | -0.338933333 | 0.002966667  |
| ZNF682       | -0.081033333 | 0.740433333  | -0.128366667 | -0.0576      | 0.2062       |
| FLJ10357     | 0.058666667  | -0.079733333 | 0.160833333  | -0.008766667 | -0.126566667 |
| EPM2AIP1     | -0.046166667 | -0.147633333 | 0.1606       | -0.109266667 | -0.080966667 |
| SUPT3H       | -0.076666667 | 0.0754       | -0.043833333 | -0.182433333 | 0.056766667  |
| LZTS2        | -0.231166667 | -0.044833333 | 0.2757       | -0.129       | -0.174066667 |
| FZD2         | 0.085733333  | 0.1437       | -0.0348      | 0.146133333  | -0.149266667 |
| NFU1         | -0.111166667 | 0.084366667  | 0.018766667  | -0.2208      | 0.061466667  |
| TSPAN31      | -0.575866667 | -0.098666667 | 0.385533333  | -0.489866667 | -0.0561      |
| KPNA6        | 0.222266667  | -0.099233333 | 0.0868       | 0.067966667  | -0.157566667 |
| LOC100131139 | -0.046       | -0.075933333 | 0.019633333  | -0.0728      | -0.001833333 |
| LOC100133591 | 0.386166667  | 0.121766667  | -0.061733333 | 0.260733333  | 0.0659       |
| SEC31A       | -0.1221      | 0.060866667  | 0.105766667  | 0.076233333  | -0.026       |
| NPAT         | 0.078433333  | 0.010033333  | 0.127266667  | 0.0361       | -0.033166667 |
| IMPDH2       | -0.120066667 | -0.016833333 | 0.0676       | -0.1546      | -0.083933333 |

|              |              |              |              |              |              |
|--------------|--------------|--------------|--------------|--------------|--------------|
| C6orf130     | -0.144233333 | 0.142166667  | -0.107666667 | 0.0011       | -0.141866667 |
| RDH14        | 0.0205       | 0.004833333  | 0.0019       | -0.044233333 | -0.045866667 |
| EXOSC7       | 0.2254       | 0.0515       | -0.0343      | 0.015166667  | -0.003633333 |
| TMEM164      | 0.094466667  | -0.003766667 | 0.126666667  | 0.0287       | -0.0057      |
| DLEU2        | 0.470866667  | 0.1658       | -0.160533333 | 0.195066667  | 0.064833333  |
| LOC730288    | -0.295866667 | 0.0925       | -0.044833333 | -0.2404      | -0.006333333 |
| MAST3        | -0.229933333 | -0.1457      | 0.307833333  | -0.147833333 | -0.145433333 |
| FTSJD2       | -0.151166667 | 0.101766667  | -0.057066667 | -0.146733333 | -0.046233333 |
| ALKBH6       | -0.072766667 | 0.064933333  | 0.105266667  | -0.0392      | 0.0274       |
| TSEN15       | -0.120433333 | 0.224133333  | -0.392766667 | -0.0492      | -0.108966667 |
| UBR1         | 0.1971       | 0.082266667  | -0.043233333 | 0.005066667  | 0.009633333  |
| GCSH         | 0.1497       | -0.012933333 | -0.096633333 | 0.078566667  | -0.1001      |
| LEPROTL1     | 0.1001       | 0.050266667  | -0.011633333 | -0.089466667 | -0.021766667 |
| HNRNPC       | 0.225366667  | 0.1254       | -0.161633333 | 0.111766667  | 0.024566667  |
| LOC400713    | -0.100933333 | 0.612233333  | -0.112866667 | -0.007966667 | 0.230966667  |
| FAM19A3      | 0.1298       | 0.0546       | 0.2555       | -0.134533333 | 0.144766667  |
| C13orf3      | 0.456866667  | 0.358033333  | -0.254833333 | 0.277033333  | 0.0253       |
| EDC4         | 0.0135       | 0.060066667  | 0.076333333  | 0.1249       | 0.011333333  |
| ZNF33A       | 0.130433333  | -0.131833333 | 0.038466667  | -0.057266667 | -0.0951      |
| FBXL6        | 0.132566667  | 0.0456       | 0.030433333  | -0.088566667 | 0.010866667  |
| ECHDC2       | -0.328633333 | -0.138933333 | 0.1906       | -0.388766667 | -0.1873      |
| RAD51AP1     | 0.431833333  | 0.076766667  | -0.082966667 | 0.195366667  | 0.0029       |
| LOC100133273 | -0.035566667 | -0.059433333 | 0.103866667  | -0.0692      | -0.121966667 |
| CPSF1        | -0.068366667 | -0.102833333 | 0.181533333  | -0.0221      | -0.093833333 |
| ZNF434       | 0.18         | -0.129133333 | -0.036066667 | -0.0323      | -0.1216      |
| PDE4DIP      | 0.006233333  | 0.1566       | -0.011033333 | 0.0566       | 0.0316       |
| BCL9         | -0.0438      | 0.0525       | 0.154166667  | -0.173733333 | -0.019766667 |
| LOC731640    | -0.105366667 | 0.0234       | -0.066566667 | -0.162333333 | 0.009666667  |
| HMHA1        | 0.022333333  | -0.0383      | 0.0672       | -0.018       | -0.066       |
| CYLN2        | -0.037866667 | -0.093066667 | 0.1562       | -0.1991      | 0.026533333  |
| MBP          | -0.020033333 | 0.054266667  | -0.025133333 | -0.1025      | 0.008066667  |
| PHF3         | -0.043633333 | -0.024933333 | 0.013766667  | -0.236566667 | 0.0231       |
| TMEM14C      | -0.0443      | -0.148333333 | 0.0231       | -0.200433333 | -0.118533333 |
| FAM128A      | -0.0648      | 0.0969       | 0.273133333  | 0.0317       | -0.031666667 |
| PURA         | -0.006333333 | 0.246966667  | 0.0498       | 0.037233333  | 0.226866667  |
| MRPL36       | 0.274833333  | 0.1194       | 0.032733333  | 0.087066667  | 0.085266667  |
| ARHGDI1A     | 0.3135       | 0.125366667  | 0.066733333  | 0.238233333  | 0.0599       |
| ATP13A1      | -0.0023      | -0.109666667 | 0.1546       | -0.133       | -0.0265      |
| HOXB2        | 0.674233333  | 0.074966667  | 0.3169       | 0.417433333  | 0.217266667  |
| CCT3         | 0.336133333  | 0.084066667  | 0.056066667  | 0.123633333  | 0.060233333  |
| FLJ20444     | -0.1581      | 0.2004       | -0.123466667 | -0.0844      | -0.112533333 |
| BOP1         | 0.186966667  | 0.190933333  | -0.0866      | 0.1416       | 0.083233333  |
| MCM4         | 0.485266667  | 0.1274       | -0.084733333 | 0.245266667  | -0.0485      |
| CAPZA2       | 0.092133333  | -0.038       | 0.080933333  | -0.035533333 | 0.023466667  |
| HOXC4        | 0.060333333  | 0.042        | 0.2354       | 0.1364       | 0.012133333  |
| LOC729439    | 0.083266667  | 0.016766667  | 0.0715       | 0.0856       | -0.018533333 |
| PPHLN1       | 0.178266667  | 0.1384       | -0.0241      | 0.094566667  | 0.090066667  |

|              |              |              |              |              |              |
|--------------|--------------|--------------|--------------|--------------|--------------|
| QARS         | -0.2438      | -0.079433333 | 0.149        | -0.268966667 | -0.1273      |
| RALGPS2      | -0.098566667 | 0.034433333  | -0.0242      | -0.112766667 | -0.011666667 |
| POMZP3       | -0.1399      | -0.138666667 | 0.038233333  | -0.153666667 | -0.115566667 |
| LY6E         | 0.0846       | -0.126266667 | 0.2662       | -0.119366667 | 0.015466667  |
| C1orf216     | 0.1347       | -0.0937      | -0.134266667 | 0.1151       | -0.235766667 |
| WIBG         | -0.011       | 0.094533333  | 0.013666667  | -0.042233333 | 0.001666667  |
| KLHL28       | -0.0849      | 0.854433333  | 0.151733333  | -0.0534      | 0.4915       |
| RBMX         | 0.1397       | 0.075966667  | 0.115733333  | 0.0704       | -0.054633333 |
| LOC100129342 | 0.201633333  | 0.0242       | -0.109866667 | 0.079566667  | -0.134433333 |
| RNASE4       | 0.136633333  | 0.0208       | 0.040666667  | 0.0765       | -0.224733333 |
| C11orf51     | 0.204066667  | 0.125        | -0.030933333 | 0.0971       | -0.001466667 |
| LOC729342    | -0.0997      | 0.214166667  | -0.325366667 | -0.117833333 | 0.045766667  |
| LOC100129094 | -0.017866667 | 0.346933333  | 0.069133333  | -0.058866667 | 0.088866667  |
| ZNF621       | -0.160233333 | -0.134066667 | -0.015066667 | -0.225866667 | -0.1734      |
| MAN1A2       | -0.0107      | -0.014033333 | -0.0227      | -0.1528      | -0.063133333 |
| SSR4         | -0.129233333 | -0.125233333 | 0.125066667  | -0.056       | -0.1573      |
| SHISA4       | -0.172466667 | -0.0246      | 0.121233333  | -0.145133333 | -0.163033333 |
| CEP78        | 0.297933333  | 0.1497       | -0.109766667 | 0.092033333  | 0.016733333  |
| LARS2        | 0.091        | -0.0061      | 0.0048       | 0.007866667  | -0.002166667 |
| DDX47        | 0.362        | 0.019333333  | 0.028533333  | 0.151866667  | -0.0127      |
| PAX9         | -0.0257      | -0.103966667 | -0.004166667 | 0.0519       | -0.2519      |
| LOC100129282 | 0.148666667  | 0.038533333  | 0.141266667  | -0.0044      | 0.051066667  |
| DBNL         | 0.075766667  | -0.0823      | 0.0543       | -0.0691      | -0.055533333 |
| AIP          | -0.224133333 | -0.065566667 | 0.139866667  | -0.1951      | -0.1508      |
| LOC645693    | -0.4304      | 0.115466667  | -0.436933333 | -0.4989      | 0.166866667  |
| FBXW7        | 0.116066667  | -0.163233333 | 0.060633333  | 0.033766667  | -0.2361      |
| CARM1        | 0.126666667  | -0.026233333 | 0.0606       | -0.107466667 | 0.0477       |
| INPP5F       | 0.1383       | 0.048033333  | 0.187866667  | 0.103733333  | -0.0311      |
| ZNF653       | -0.070866667 | 0.1638       | -0.0364      | -0.150433333 | 0.041933333  |
| ABHD4        | -0.0304      | -0.0294      | -0.037866667 | -0.120166667 | -0.081       |
| MCOLN3       | 0.006566667  | -0.093266667 | -0.150966667 | -0.108866667 | -0.066966667 |
| C1orf189     | 0.110833333  | 0.005233333  | 0.1336       | 0.123833333  | -0.0838      |
| LOC654189    | -0.438333333 | 0.2334       | 0.2171       | -0.367933333 | 0.090533333  |
| CDC2L5       | 0.068233333  | 0.097766667  | 0.1056       | 0.052166667  | 0.010266667  |
| TPRKB        | 0.126233333  | 0.279333333  | -0.148166667 | 0.063233333  | 0.1851       |
| BFSP1        | -0.342766667 | -0.039666667 | 0.121166667  | -0.2088      | -0.0992      |
| CICE         | 0.107833333  | -0.047333333 | -0.037466667 | 0.069633333  | -0.079766667 |
| LOC649873    | -0.121633333 | 0.281333333  | -0.2486      | -0.248633333 | 0.157466667  |
| BCAT1        | -0.059566667 | -0.164833333 | -0.067       | -0.294833333 | -0.1122      |
| LOC729236    | -0.19        | -0.0163      | -0.1376      | -0.2653      | -0.021966667 |
| DTD1         | 0.109333333  | -0.011733333 | -0.124966667 | -0.0831      | 0.0058       |
| C2orf44      | 0.371733333  | 0.0635       | 0.009033333  | 0.1735       | -0.0295      |
| LOC100129064 | 0.288466667  | -0.035566667 | 0.0913       | 0.149266667  | -0.089933333 |
| NTAN1        | -0.0968      | 0.033433333  | 0.230566667  | -0.118233333 | 0.036866667  |
| LCN1L1       | 0.187133333  | 0.036733333  | -0.048066667 | 0.004433333  | -0.132466667 |
| DNM1L        | -0.042766667 | 0.1902       | 0.039266667  | 0.112066667  | -0.142466667 |
| LOC729798    | -0.384966667 | 0.162933333  | -0.415133333 | -0.523866667 | 0.0898       |



|              |              |              |              |              |              |
|--------------|--------------|--------------|--------------|--------------|--------------|
| C19orf52     | 0.177133333  | -0.052866667 | -0.086266667 | -0.034866667 | -0.048366667 |
| ARAP3        | -0.1032      | 0.019966667  | 0.289866667  | -0.1543      | 0.025433333  |
| ANPEP        | 0.136566667  | 0.0264       | 0.376466667  | -0.005066667 | -0.013266667 |
| ATP5EP2      | -0.014966667 | 0.0245       | 0.023366667  | -0.130366667 | -0.022433333 |
| WDR6         | -0.011533333 | -0.1521      | 0.1093       | -0.135133333 | -0.132333333 |
| R3HCC1       | -0.0298      | 0.0916       | 0.076766667  | -0.062466667 | 0.018033333  |
| ERGC1        | -0.0445      | 0.5277       | -0.235233333 | -0.1021      | -0.029666667 |
| ARSD         | -0.215133333 | -0.193933333 | 0.343233333  | -0.3253      | 0.010066667  |
| LOC650646    | 0.111533333  | 0.1047       | 0.0195       | 0.016        | 0.0019       |
| RHOB         | -0.0756      | -0.132766667 | 0.0464       | -0.1911      | -0.1877      |
| MDFIC        | 0.240833333  | 0.153766667  | 0.006033333  | 0.078466667  | 0.025566667  |
| TMEM85       | 0.174333333  | -0.033466667 | -0.092433333 | 0.004533333  | -0.031366667 |
| KIF24        | 0.174766667  | 0.085533333  | -0.163233333 | 0.0017       | -0.114233333 |
| NUMBL        | 0.068766667  | -0.077133333 | 0.018966667  | -0.015533333 | -0.028166667 |
| NGG5         | 0.046033333  | -0.034133333 | 0.186266667  | -0.072966667 | -0.040766667 |
| LOC100133489 | 0.050666667  | 0.0753       | 0.2047       | 0.116666667  | 0.016366667  |
| SPANXD       | -0.178       | -0.017533333 | 0.122333333  | -0.076333333 | -0.147533333 |
| LOC440737    | 0.118533333  | -0.0746      | 0.0891       | 0.043833333  | -0.190366667 |
| MYH9         | 0.147966667  | -0.021266667 | -0.1457      | 0.009066667  | -0.057133333 |
| ATPBD1B      | 0.110866667  | 0.080733333  | -0.227533333 | -0.058533333 | -0.079533333 |
| SLC22A17     | 0.102866667  | -0.056766667 | 0.104166667  | -0.0476      | 0.032        |
| LOC651576    | 0.423966667  | 0.1471       | -0.1511      | 0.2092       | 0.0196       |
| PABPC5       | 0.0782       | -0.109566667 | 0.0473       | 0.071233333  | -0.126233333 |
| LOC100130552 | 0.022266667  | 0.0679       | 0.012766667  | -0.048633333 | 0.030366667  |
| PARD6G       | 0.116666667  | -0.056166667 | 0.049833333  | 0.000633333  | -0.129766667 |
| HNRPLL       | -0.2931      | 0.093233333  | 0.076133333  | -0.106766667 | -0.016       |
| SPRR1A       | -0.032866667 | -0.008866667 | 0.082866667  | 0.0357       | -0.176733333 |
| SKI          | 0.167766667  | 0.134766667  | -0.034966667 | 0.051        | 0.004966667  |
| LOC100129203 | 0.1025       | 0.1038       | -0.071133333 | -0.124333333 | -0.0793      |
| PRKRA        | 0.0897       | -0.009933333 | -0.168533333 | -0.064233333 | -0.0492      |
| LOC100130276 | -0.2569      | 0.772833333  | -0.3497      | -0.268333333 | 0.177233333  |
| CASD1        | 0.047166667  | 0.006466667  | 0.054166667  | -0.0729      | -0.0634      |
| MTMR4        | -0.1568      | 0.111433333  | 0.1184       | -0.186033333 | -0.0385      |
| FBXL20       | -0.2092      | 0.0094       | 0.0493       | -0.296933333 | -0.0628      |
| PAPPA        | -0.026066667 | 0.0033       | 0.121666667  | -0.0999      | -0.0743      |
| SSX2IP       | -0.036466667 | 0.010833333  | -0.064533333 | -0.179466667 | 0.040766667  |
| FAM173B      | -0.111133333 | 0.0459       | -0.0324      | -0.203266667 | -0.032466667 |
| ALS2         | -0.0667      | 0.007833333  | -0.013066667 | -0.058933333 | -0.058866667 |
| MARK2        | 0.354966667  | 0.058433333  | 0.0688       | 0.2536       | -0.013366667 |
| TM9SF4       | -0.093466667 | 0.028633333  | -0.0203      | -0.140766667 | -0.2371      |
| RPL17        | 0.129266667  | 0.031533333  | -0.009066667 | -0.021       | -0.022833333 |
| TMEM129      | 0.0477       | -0.236566667 | 0.0099       | -0.142933333 | -0.177766667 |
| ATM          | -0.159866667 | -0.017466667 | 0.305866667  | -0.114433333 | -0.069333333 |
| LOC440341    | 0.1576       | -0.208433333 | -0.0786      | -0.005933333 | -0.271633333 |
| LOC388588    | -0.041333333 | 0.101166667  | 0.1079       | 0.0254       | -0.041733333 |
| LOC441155    | 0.0224       | 0.046866667  | 0.230366667  | -0.097466667 | -0.035633333 |
| LOC727967    | 0.092233333  | 0.0838       | -0.001366667 | -0.006966667 | -0.001633333 |

|              |              |              |              |              |              |
|--------------|--------------|--------------|--------------|--------------|--------------|
| WDR5         | 0.369133333  | 0.029466667  | 0.004166667  | 0.125766667  | 0.039233333  |
| FAM125B      | -0.0766      | -0.0493      | 0.072066667  | 0.001666667  | -0.161833333 |
| DIP2B        | 0.0522       | 0.0215       | 0.1022       | 0.0216       | -0.0782      |
| HERC2P2      | 0.027966667  | -0.064066667 | 0.129166667  | -0.0087      | -0.056133333 |
| POPDC3       | -0.137966667 | 0.049833333  | 0.046066667  | -0.142666667 | -0.0416      |
| BUD13        | 0.206833333  | 0.183466667  | -0.032366667 | 0.069633333  | 0.022633333  |
| ARPC1A       | -0.000266667 | 0.043        | -0.1488      | -0.144866667 | -0.078733333 |
| C6orf108     | -0.056966667 | -0.184266667 | 0.2225       | -0.276366667 | 0.028733333  |
| REEP4        | 0.096633333  | 0.0418       | 0.104433333  | 0.063233333  | 0.023966667  |
| MPI          | -0.125633333 | -0.0826      | 0.240866667  | -0.107833333 | -0.156266667 |
| SHC1         | -0.340266667 | -0.0117      | 0.368933333  | -0.3119      | -0.062566667 |
| ATP5A1       | -0.069366667 | -0.072       | 0.089666667  | -0.134133333 | -0.025866667 |
| LOC643997    | -0.040066667 | 0.1938       | -0.2056      | -0.039466667 | -0.055033333 |
| LOC649049    | -0.056033333 | -0.145133333 | 0.137733333  | -0.068766667 | -0.115266667 |
| LOC131691    | -0.1717      | 0.287066667  | -0.365666667 | -0.2857      | 0.204633333  |
| NPM3         | 0.0968       | 0.115466667  | -0.026       | 0.003933333  | 0.014        |
| LYSMD4       | -0.0055      | 0.008333333  | -0.046833333 | -0.126466667 | 0.0188       |
| B3GALTL      | 0.240066667  | 0.1202       | -0.018766667 | 0.080433333  | 0.0112       |
| CISD2        | 0.233233333  | 0.059333333  | -0.056366667 | 0.1832       | -0.0003      |
| LRTOMT       | -0.047133333 | -0.013033333 | -0.017233333 | -0.1756      | -0.091133333 |
| LOC100128505 | -0.0335      | 0.3632       | -0.013433333 | -0.0481      | 0.044666667  |
| LOC100129934 | -0.079966667 | 0.187233333  | -0.226633333 | -0.1096      | 0.090633333  |
| KIAA1618     | -0.3778      | 0.047866667  | 0.143766667  | -0.455       | 0.039066667  |
| LOC730323    | -0.042166667 | -0.002033333 | 0.091933333  | 0.024933333  | 0.033        |
| PHF2         | 0.026666667  | -0.083966667 | 0.1548       | -0.128166667 | -0.050366667 |
| CDH12        | -0.386633333 | -0.0213      | 0.4143       | -0.0986      | -0.158       |
| LOC647436    | 0.023466667  | 0.159766667  | -0.383466667 | -0.1106      | -0.061633333 |
| CEP152       | 0.130866667  | 0.109333333  | 0.007666667  | 0.083233333  | -0.087866667 |
| ABCA10       | -0.119533333 | 0.0548       | -0.035633333 | -0.185966667 | -0.081033333 |
| CD70         | -0.039266667 | -0.1335      | 0.149566667  | -0.2661      | -0.091566667 |
| ATRIP        | 0.213        | 0.267066667  | -0.0012      | 0.1939       | -0.0031      |
| RHOBTB2      | 0.115333333  | 0.012366667  | 0.107366667  | 0.0667       | -0.013166667 |
| PHTF1        | -0.1         | -0.0218      | 0.2165       | -0.112866667 | -0.099533333 |
| LOC644879    | 0.330866667  | 0.0257       | 0.039533333  | 0.206566667  | 0.006666667  |
| ZNF564       | -0.123266667 | -0.082966667 | 0.086866667  | -0.107133333 | -0.158666667 |
| CATSPER2P1   | -0.0571      | 0.067433333  | 0.027866667  | -0.0089      | -0.167166667 |
| GAPDH        | -0.0461      | -0.066933333 | 0.360633333  | -0.086733333 | -0.1293      |
| LOC100131905 | -0.021433333 | 0.002033333  | 0.131933333  | -0.0237      | 0.022166667  |
| DDHD2        | -0.0037      | 0.037133333  | 0.159366667  | 0.0199       | -0.057733333 |
| LOC648399    | -0.075133333 | 0.318566667  | 0.025566667  | 0.0988       | 0.037166667  |
| PIAS3        | -0.003533333 | -0.015233333 | 0.108233333  | 0.023066667  | -0.176033333 |
| C7orf23      | 0.332266667  | -0.0924      | 0.051366667  | 0.1451       | -0.018433333 |
| ABCD1        | -0.1318      | -0.156       | 0.083166667  | -0.201233333 | -0.170933333 |
| GGTLC1       | 0.128833333  | -0.0682      | 0.141933333  | 0.060666667  | -0.081666667 |
| TMEM161B     | 0.022733333  | 0.059933333  | -0.132433333 | -0.086566667 | -0.036966667 |
| ZNHIT3       | 0.0039       | 0.055066667  | -0.077933333 | -0.0919      | -0.004633333 |
| GAPVD1       | 0.072433333  | 0.095        | 0.060233333  | -0.070166667 | 0.015033333  |

|              |              |              |              |              |              |
|--------------|--------------|--------------|--------------|--------------|--------------|
| PARN         | 0.0463       | -0.0598      | 0.0077       | -0.136533333 | -0.1225      |
| WDR26        | -0.0266      | -0.053533333 | 0.0136       | -0.031533333 | -0.1314      |
| LOC729684    | -0.484133333 | 0.149933333  | -0.4589      | -0.5861      | 0.0794       |
| ACTR6        | -0.022533333 | 0.045133333  | 0.185233333  | -0.055466667 | 0.139833333  |
| SLC35A1      | 0.0379       | -0.026466667 | 0.048766667  | -0.027833333 | -0.0658      |
| SEC23IP      | 0.103066667  | 0.197666667  | 0.067966667  | 0.072766667  | -0.0501      |
| SLC39A9      | -0.0331      | 0.0827       | 0.096566667  | -0.071866667 | -0.0202      |
| UPF3A        | -0.1033      | -0.183133333 | 0.065533333  | -0.163666667 | -0.100033333 |
| FAM46C       | 0.0224       | -0.007266667 | 0.222266667  | -0.013133333 | 0.019433333  |
| LPAR3        | 0.121566667  | -0.0011      | -0.0438      | -0.015066667 | -0.027766667 |
| C2orf24      | 0.143366667  | -0.026333333 | -0.055       | 0.053033333  | -0.094366667 |
| SON          | 0.156466667  | 0.085433333  | 0.1356       | 0.203033333  | -0.051133333 |
| LOC389765    | -0.159133333 | 0.909566667  | -0.115333333 | -0.1344      | 0.463933333  |
| RPS17        | 0.043066667  | 0.044033333  | 0.068866667  | -0.0193      | 0.0486       |
| C16orf88     | 0.205033333  | 0.167066667  | 0.0195       | 0.165133333  | -0.079       |
| RCC2         | 0.2693       | 0.087633333  | 0.0168       | 0.001566667  | 0.0281       |
| TEX2         | 0.1576       | -0.1293      | -0.013266667 | 0.0427       | -0.141866667 |
| LOC100133055 | 0.2928       | -0.1123      | -0.0562      | 0.2335       | -0.1686      |
| FLJ22795     | -0.0838      | 0.067066667  | -0.083533333 | -0.104066667 | -0.083566667 |
| TDG          | 0.1837       | -0.0892      | 0.163033333  | 0.083233333  | -0.070566667 |
| LETM1        | 0.2707       | 0.0918       | -0.052533333 | 0.0343       | 0.023866667  |
| GTDC1        | 0.0653       | -0.0021      | 0.024866667  | 0.0659       | -0.0455      |
| KIAA2026     | -0.136366667 | -0.077766667 | 0.1282       | -0.051       | -0.187366667 |
| LOC100132364 | -0.045666667 | -0.096133333 | -0.007533333 | -0.125966667 | -0.142833333 |
| PSME2        | -0.046033333 | 0.0515       | 0.102566667  | -0.073466667 | 0.0454       |
| DISP1        | -0.2321      | -0.0949      | 0.019433333  | -0.3175      | -0.095533333 |
| MICALL1      | 0.132        | 0.0629       | -0.0105      | 0.073033333  | -0.069733333 |
| RPRD1B       | 0.2469       | 0.060666667  | -0.047933333 | 0.236466667  | -0.181066667 |
| LILRB3       | -0.031       | 0.479633333  | 0.027233333  | 0.040833333  | 0.009733333  |
| C3orf39      | 0.225333333  | 0.003833333  | -0.068666667 | 0.097066667  | -0.161133333 |
| EIF2AK4      | -0.1177      | 0.5205       | -0.007833333 | 0.024533333  | -0.001433333 |
| PKIG         | -0.0309      | -0.051166667 | 0.0608       | -0.028566667 | -0.228366667 |
| YIPF4        | -0.272233333 | 0.022333333  | 0.110733333  | -0.1833      | -0.0333      |
| NDUFA12      | 0.128966667  | -0.008366667 | -0.0455      | -0.0265      | -0.045066667 |
| DEM1         | -0.270466667 | 0.810766667  | -0.0514      | -0.103766667 | 0.2177       |
| FASN         | 0.3319       | -0.458733333 | 0.257466667  | -0.038966667 | -0.076866667 |
| FSCN1        | 0.209566667  | -0.0066      | 0.199833333  | 0.036566667  | -0.000233333 |
| PTPN2        | -0.016233333 | 0.212666667  | -0.0047      | -0.039866667 | 0.076666667  |
| RAD54L2      | 0.1992       | -0.0269      | 0.141033333  | 0.142066667  | -0.1438      |
| POMT1        | -0.105566667 | 0.0539       | 0.1334       | -0.107166667 | -0.071566667 |
| BRD1         | 0.007666667  | 0.104633333  | -0.070533333 | 0.0131       | -0.026733333 |
| LOC100134189 | 0.352766667  | 0.105266667  | 0.1073       | 0.2549       | 0.075133333  |
| AKR1A1       | -0.233766667 | -0.0338      | 0.036366667  | -0.1733      | -0.0761      |
| LAIR1        | 0.032433333  | -0.021733333 | 0.078166667  | -0.024433333 | 0.047166667  |
| FUCA1        | -0.167666667 | -0.0128      | 0.128066667  | -0.160966667 | -0.0431      |
| GTF2IRD2B    | -0.175966667 | -0.2389      | 0.137333333  | -0.134333333 | -0.1059      |
| KIAA0391     | 0.0198       | 0.1727       | 0.034433333  | -0.008933333 | -0.004866667 |

|           |       |              |              |              |              |              |
|-----------|-------|--------------|--------------|--------------|--------------|--------------|
| CNR1      |       | 0.1038       | 0.055366667  | -0.099333333 | -0.0356      | -0.103966667 |
| MTF1      |       | 0.0501       | -0.0249      | 0.133933333  | 0.044        | -0.065166667 |
| RIC8B     |       | 0.140066667  | -0.011366667 | 0.096533333  | 0.021066667  | -0.008533333 |
| PER3      |       | 0.007933333  | 0.0949       | -0.000466667 | -0.077233333 | 0.0386       |
| GLRX5     |       | 0.217366667  | 0.064466667  | -0.011566667 | 0.101366667  | 0.005966667  |
| POLR2G    |       | -0.0142      | -0.0516      | 0.069266667  | -0.071066667 | -0.099466667 |
| RPL31P10  |       | -0.434566667 | 0.2495       | -0.495766667 | -0.545433333 | 0.0777       |
| ZNF420    |       | 0.049933333  | 0.019333333  | -0.0233      | -0.062066667 | 0.0098       |
| PLK4      |       | 0.359066667  | 0.1357       | -0.017233333 | 0.057633333  | -0.0259      |
| LOC390298 |       | -0.026166667 | 0.050933333  | 0.0225       | -0.199433333 | 0.064        |
| HIST2H2BF |       | 0.010966667  | 0.123733333  | -0.1002      | -0.078266667 | -0.0141      |
| GPD1L     |       | -0.1995      | 0.049566667  | 0.217133333  | -0.155533333 | 4.00E-04     |
| FTSJ1     |       | 0.4275       | 0.1568       | -0.142933333 | 0.270466667  | 0.010233333  |
| SLC35E3   |       | -0.023233333 | -0.0037      | 0.019966667  | -0.038333333 | -0.249533333 |
| FBXW9     |       | -0.181133333 | 0.0148       | 0.091466667  | -0.1095      | -0.1057      |
| C11orf57  |       | 0.018933333  | 0.0007       | -0.0428      | -0.0665      | -0.119466667 |
| ZBTB42    |       | -0.041766667 | -0.045066667 | 0.121633333  | -0.1201      | -0.073166667 |
| LTBP4     |       | -0.002533333 | -0.082633333 | 0.099466667  | -0.1094      | -0.019933333 |
| DOLK      |       | 0.123433333  | -0.189366667 | 0.0977       | 0.018866667  | -0.188733333 |
| GNB1L     |       | 0.1099       | 0.329566667  | 0.0578       | 0.039033333  | 0.0815       |
| HBG2      |       | -0.097       | -0.063633333 | 0.028266667  | -0.063033333 | -0.157033333 |
| DYNC1LI2  |       | -0.227966667 | -0.011333333 | 0.1374       | -0.259866667 | -0.1048      |
| EDC3      |       | 0.1307       | 0.027466667  | 0.035266667  | 0.0207       | -0.083833333 |
| PDPK1     |       | 0.0301       | -0.0823      | 0.133833333  | -0.118533333 | 0.026133333  |
| LOC643863 |       | 0.132        | -0.0283      | 0.018233333  | 0.0249       | -0.0092      |
|           | 9-Sep | 0.103833333  | -0.063233333 | 0.1113       | 0.012933333  | -0.066433333 |
| NPEPPS    |       | -0.3378      | -0.089433333 | 0.263766667  | -0.2831      | -0.171666667 |
| R3HDM2    |       | -0.106       | 0.0444       | -0.0061      | -0.1992      | -0.0742      |
| MAP3K7IP2 |       | -0.036733333 | 0.097333333  | 0.0318       | -0.106433333 | 0.048766667  |
| PJA2      |       | -0.3064      | -0.134133333 | 0.3152       | -0.2266      | -0.150533333 |
| SMCR5     |       | -0.196933333 | 0.4741       | -0.0913      | -0.0951      | -0.0416      |
| ARHGAP21  |       | -0.045966667 | -0.280133333 | -0.108033333 | -0.182066667 | -0.279766667 |
| WASH1     |       | 0.165566667  | 0.105833333  | 0.049733333  | 0.224466667  | -0.1744      |
| C9orf80   |       | -0.133066667 | 0.450033333  | -0.1026      | -0.212866667 | 0.0778       |
| GLIPR2    |       | -0.126733333 | -0.231833333 | 0.082433333  | -0.3091      | -0.210933333 |
| LOC646996 |       | 0.030133333  | 0.519933333  | -0.029733333 | -0.014266667 | 0.203866667  |
| GJA3      |       | 0.115733333  | -0.1126      | -0.013533333 | -0.0754      | -0.0567      |
| MAGOH     |       | 0.313533333  | 0.1649       | -0.122433333 | 0.1521       | 0.034933333  |
| IDE       |       | 0.049933333  | 0.107466667  | 0.0837       | -0.0481      | -0.012466667 |
| BBS9      |       | -0.0438      | 0.014033333  | 0.0242       | -0.074333333 | -0.005866667 |
| LOC729708 |       | -0.0777      | 0.1442       | 0.192233333  | -0.037066667 | 0.001366667  |
| C18orf54  |       | 0.076166667  | 0.238166667  | 0.0947       | -0.026433333 | 0.135133333  |
| SELO      |       | 0.016333333  | -0.112966667 | 0.053033333  | -0.103366667 | -0.127366667 |
| SPATA20   |       | -0.1287      | -0.159933333 | 0.3001       | -0.100433333 | -0.137433333 |
| CDK2AP2   |       | -0.129866667 | 0.143433333  | 0.138566667  | -0.137533333 | 0.053133333  |
| LYPLAL1   |       | -0.316833333 | -0.023933333 | 0.046266667  | -0.226666667 | -0.018733333 |
| NPHP4     |       | -0.011733333 | -0.1183      | 0.1198       | -0.0979      | -0.046966667 |

|              |              |              |              |              |              |
|--------------|--------------|--------------|--------------|--------------|--------------|
| LOC643384    | -0.256866667 | -0.091233333 | 0.168433333  | -0.261533333 | -0.194966667 |
| CDK2AP1      | 0.140466667  | -0.015966667 | 0.169633333  | 0.133166667  | 0.001833333  |
| FEM1C        | 0.0906       | -0.526266667 | -0.0489      | -0.247266667 | -0.273133333 |
| C6orf125     | -0.014033333 | 0.0064       | 0.231233333  | -0.035166667 | 0.0106       |
| TUSC3        | 0.009233333  | 0.037366667  | 0.0045       | -0.060833333 | -0.1132      |
| LOC729985    | 0.068066667  | 0.049733333  | 0.0357       | 0.082766667  | -0.114333333 |
| MRPL48       | -0.005633333 | 0.090266667  | -0.128233333 | -0.031733333 | -0.027733333 |
| TYMS         | 0.230233333  | 0.085566667  | 0.035633333  | 0.164466667  | -0.047466667 |
| SNORD110     | 0.425366667  | 0.1049       | -0.148133333 | 0.208766667  | -0.0677      |
| LOC648294    | -0.338633333 | 0.308233333  | -0.1263      | -0.222933333 | 0.1219       |
| MRPL37       | 0.065666667  | 0.013033333  | 0.056        | -0.0186      | -0.0157      |
| COX7B        | -0.114866667 | -0.0163      | 0.023366667  | -0.1847      | -0.029933333 |
| LOC646897    | 0.038133333  | 0.4358       | -0.067933333 | -0.0699      | 0.2196       |
| EHBP1        | -0.007166667 | 0.0328       | 0.227533333  | -0.1065      | -0.090266667 |
| IKZF4        | -0.042166667 | -0.067266667 | 0.0337       | -0.167033333 | -0.1332      |
| C4orf48      | -0.160133333 | 0.1593       | 0.111766667  | -0.096266667 | -0.012633333 |
| LOC648283    | 0.135933333  | 0.173566667  | 0.108633333  | 0.042433333  | 0.043266667  |
| PPIL1        | 0.244266667  | 0.057533333  | 0.007366667  | 0.147166667  | 0.0037       |
| LOC100132565 | -0.036566667 | 0.082933333  | -0.0317      | -0.0914      | -0.162166667 |
| POP5         | -0.011133333 | -0.021166667 | -0.0494      | -0.1341      | -0.105       |
| C11orf63     | -0.183233333 | 0.996333333  | -0.402266667 | -0.2031      | 0.365533333  |
| ARFIP1       | -0.077333333 | 0.092666667  | 0.005866667  | -0.168233333 | -0.016       |
| LOC653874    | 0.281133333  | 0.024266667  | 0.1603       | 0.132933333  | 0.090233333  |
| NCAPD3       | 0.380233333  | 0.069766667  | 0.038633333  | 0.141966667  | -0.0917      |
| ASPHD2       | 0.028533333  | -0.065433333 | 0.081733333  | -0.018166667 | -0.1262      |
| GLMN         | 0.1773       | 0.1439       | 0.018233333  | 0.078666667  | 0.0682       |
| LOC100132457 | 0.124633333  | 0.2044       | 0.043466667  | 0.001766667  | 0.103666667  |
| MAPK3        | -0.288833333 | -0.1472      | 0.313        | -0.3326      | -0.170833333 |
| ANO10        | 0.060333333  | -0.043266667 | 0.190033333  | -0.033833333 | -0.0452      |
| C17orf75     | -0.042133333 | -0.0355      | -0.002333333 | -0.0567      | -0.099466667 |
| LILRB1       | -0.182566667 | 0.543166667  | -0.137166667 | -0.211633333 | 0.105466667  |
| CCDC88A      | 0.021466667  | -0.095733333 | 0.2006       | -0.034133333 | -0.004666667 |
| LOC728565    | 0.016166667  | -0.131233333 | 0.1634       | -0.1046      | -0.124566667 |
| MPZL1        | 0.316233333  | 0.006966667  | 0.051566667  | 0.160133333  | 0.001533333  |
| PCYT2        | -0.077866667 | -0.020133333 | 0.0575       | -0.183133333 | -0.0631      |
| PSMC3IP      | 0.3712       | 0.148333333  | -0.0662      | 0.207233333  | 0.0096       |
| MFAP1        | 0.155866667  | 0.113233333  | 0.099766667  | 0.129833333  | 0.005633333  |
| BCAS4        | 0.001833333  | 0.0015       | 0.13         | -0.041533333 | -0.006666667 |
| CYTH3        | 0.304966667  | 0.208833333  | -0.1345      | 0.301066667  | -0.001133333 |
| PARP4        | -0.214566667 | 0.035066667  | 0.070066667  | -0.2937      | 0.025        |
| YIF1A        | -0.116733333 | 0.009833333  | 0.025833333  | -0.179366667 | -0.070466667 |
| TEX9         | -0.187066667 | 0.074633333  | 0.0302       | -0.207133333 | -0.0693      |
| TCIRG1       | -0.097933333 | -0.065533333 | 0.117233333  | -0.2208      | -0.058166667 |
| MINPP1       | -0.1332      | -0.038333333 | 0.088266667  | -0.329633333 | 0.033366667  |
| SIP1         | 0.191466667  | 0.106933333  | 0.041333333  | 0.139        | -0.008233333 |
| DNAJC21      | -0.018833333 | -0.029566667 | 0.0471       | -0.188933333 | -0.026033333 |
| COPS4        | -0.046833333 | 0.0614       | 0.161266667  | -0.000466667 | 0.008533333  |

|              |              |              |              |              |              |
|--------------|--------------|--------------|--------------|--------------|--------------|
| MBOAT2       | -0.099366667 | 0.541133333  | 0.0762       | -0.003033333 | 0.2106       |
| KIAA1211     | -0.094266667 | -0.0395      | 0.0643       | -0.057366667 | -0.088433333 |
| AXIN1        | 0.195966667  | 0.0467       | 0.095833333  | 0.214        | -0.1121      |
| CHD1L        | 0.218566667  | 0.092166667  | -0.043566667 | 0.161266667  | -0.149433333 |
| LOC100133950 | 0.103733333  | 0.205533333  | -0.1451      | -0.0631      | -0.085766667 |
| LOC652071    | 0.045766667  | 0.0985       | -0.007633333 | -0.031866667 | -0.081333333 |
| HYAL2        | 0.1209       | 0.0204       | 0.214866667  | -0.034966667 | 0.1002       |
| CST3         | -0.108066667 | -0.0915      | 0.115966667  | -0.2456      | -0.077733333 |
| FDFT1        | -0.171533333 | -0.059966667 | 0.1769       | -0.1995      | -0.175733333 |
| KIAA1797     | 0.0571       | 0.1475       | 0.0772       | -0.036433333 | 0.051366667  |
| UBP1         | 0.2237       | 0.0738       | 0.054466667  | 0.091666667  | 0.045433333  |
| RIPK1        | 0.096666667  | 0.022666667  | 0.044333333  | 0.004466667  | -0.051366667 |
| LOC651894    | -0.158366667 | 0.035066667  | -0.091066667 | -0.253166667 | -0.068733333 |
| ACSS2        | -0.422333333 | -0.106933333 | 0.450933333  | -0.368933333 | -0.120566667 |
| TGIF1        | -0.1679      | -0.2854      | 0.193833333  | -0.181666667 | -0.279266667 |
| NUSAP1       | 0.0743       | 0.202133333  | 0.011866667  | 0.008733333  | 0.035766667  |
| LOC130773    | -0.078533333 | 0.073233333  | -0.088733333 | -0.1553      | -0.011266667 |
| C2orf69      | -0.110966667 | 0.542666667  | -0.128033333 | -0.117466667 | 0.0503       |
| LOC100134868 | -0.1286      | 0.7693       | -0.290533333 | -0.0737      | 0.021733333  |
| HELQ         | 0.090233333  | 0.113433333  | 0.008166667  | 0.013866667  | -0.004466667 |
| BLZF1        | -0.206033333 | 0.822733333  | -0.026466667 | -0.1107      | 0.1944       |
| YWHAH        | 0.3593       | 0.1454       | -0.123633333 | 0.136033333  | -0.002033333 |
| LOC646567    | 0.161166667  | 0.047366667  | 0.327866667  | 0.0747       | 0.050466667  |
| COPS2        | -0.079533333 | 0.289733333  | -0.104066667 | -0.0179      | -0.033966667 |
| CNRIP1       | 0.087633333  | 0.2254       | 0.0553       | 0.0453       | 0.0602       |
| TM2D3        | -0.184033333 | 0.014866667  | 0.180566667  | -0.152333333 | -0.0909      |
| RNF122       | 0.0391       | 0.090533333  | 0.1456       | 0.016233333  | 0.071033333  |
| BCL7C        | 0.086733333  | 0.027433333  | 0.0385       | -0.004       | -0.070266667 |
| WARS2        | 0.1047       | 0.091066667  | -0.0575      | 0.002333333  | -0.0659      |
| SIAH1        | -0.0579      | 0.004233333  | 0.017966667  | -0.1177      | -0.181633333 |
| FLVCR1       | 0.283133333  | 0.124766667  | 0.153466667  | 0.140966667  | 0.036366667  |
| LOC442064    | -0.006533333 | 0.162633333  | -0.1077      | -0.098066667 | -0.0605      |
| RPL29        | 0.1702       | 0.1116       | 0.0004       | 0.0206       | 0.009066667  |
| LOC441484    | 0.234        | 0.254666667  | -0.073266667 | 0.1987       | 0.105433333  |
| PALB2        | 0.2615       | -0.0317      | 0.034866667  | 0.0832       | -0.1757      |
| PTPRF        | 0.266533333  | 0.125466667  | 0.106866667  | 0.092666667  | 0.0332       |
| A2LD1        | -0.033033333 | -0.162633333 | 0.057733333  | -0.349666667 | 0.012666667  |
| TMEM191B     | 0.0032       | -0.023966667 | -0.001133333 | -0.062266667 | -0.161333333 |
| GGCX         | 0.037166667  | 0.0191       | 0.039766667  | -0.0615      | -0.1174      |
| LOC200030    | 0.055        | 0.034        | 0.245033333  | 0.0562       | -0.091766667 |
| LOC646426    | 0.0375       | 0.097366667  | -0.000433333 | -0.021866667 | -0.044233333 |
| SPC25        | 0.340966667  | 0.2929       | -0.095866667 | 0.259666667  | 0.053833333  |
| LOC644563    | 0.196366667  | 0.046266667  | -0.0308      | -0.016533333 | 0.021366667  |
| ZDHHC4       | -0.198633333 | -0.107966667 | 0.1751       | -0.3236      | -0.085766667 |
| STC2         | 0.3564       | -0.173433333 | -0.427866667 | 0.1468       | -0.256066667 |
| LOC100190938 | -0.067666667 | 0.582733333  | 0.0024       | -0.015733333 | 0.139366667  |
| ZCCHC3       | 0.173566667  | 0.0111       | 0.0248       | -0.009866667 | -0.048433333 |

|              |              |              |              |              |              |
|--------------|--------------|--------------|--------------|--------------|--------------|
| EFTUD1       | -0.0286      | -0.0045      | 0.169333333  | -0.125233333 | -0.0959      |
| LRDD         | -0.047333333 | -0.0584      | 0.230433333  | -0.0148      | -0.062333333 |
| LOC646294    | 0.0785       | -0.133366667 | 0.045866667  | -0.028666667 | -0.167333333 |
| KLHL5        | 0.111        | 0.066533333  | -0.0409      | 0.162933333  | -0.066733333 |
| PRKAG1       | 0.0738       | -0.099833333 | -0.056533333 | -0.1038      | -0.1546      |
| CAMSAP1L1    | 0.063333333  | 0.020666667  | -0.004566667 | 0.024766667  | -0.0647      |
| ISG15        | -0.271633333 | -0.022033333 | 0.139233333  | -0.3468      | -0.0105      |
| SNHG6        | 0.058466667  | -0.031433333 | 0.0607       | -0.114566667 | -0.0087      |
| C14orf124    | 0.1472       | -0.048       | -0.010766667 | -0.0465      | 0.011866667  |
| SMARCA5      | 0.0624       | 0.1471       | 0.0656       | -0.016433333 | -0.115766667 |
| RNF146       | -0.094833333 | 0.083233333  | -0.052133333 | -0.026766667 | -0.067833333 |
| USP39        | 0.225666667  | 0.048533333  | 0.0071       | 0.045666667  | -0.0059      |
| LOC401817    | -0.1515      | 0.224166667  | -0.130266667 | -0.188166667 | 0.117133333  |
| AKT1         | 0.105433333  | -0.156066667 | -0.005066667 | -0.099966667 | -0.129166667 |
| TNFSF12      | -0.064033333 | 0.039166667  | 0.0863       | -0.127366667 | 0.000833333  |
| TBC1D14      | 0.225666667  | -0.071966667 | -0.0551      | 0.1185       | -0.155866667 |
| NDUFA5       | -0.225133333 | 0.046933333  | 0.0511       | -0.301066667 | 0.072566667  |
| HEATR6       | 0.1211       | -0.0094      | -0.041966667 | -0.060033333 | -0.1376      |
| S100A14      | 0.066866667  | 0.025333333  | 0.127566667  | 0.014233333  | -0.095633333 |
| CIP29        | 0.005066667  | 0.014        | 0.0323       | 0.003        | -0.1006      |
| INTS5        | 0.195166667  | 0.037266667  | 0.1188       | 0.056533333  | 0.005266667  |
| ZNF20        | -0.074733333 | 0.0396       | -0.004166667 | -0.0153      | -0.181066667 |
| C21orf24     | -0.127833333 | 0.462933333  | 0.050533333  | -0.0206      | 0.061766667  |
| HSD11B1L     | 0.387166667  | -0.138133333 | -0.131533333 | 0.053        | -0.199566667 |
| RPS10P3      | -0.067133333 | -0.022433333 | -0.047066667 | -0.174833333 | -0.0766      |
| SLC2A3       | -0.095266667 | -0.224866667 | 0.451966667  | 0.0991       | -0.218033333 |
| LOC91561     | -0.042233333 | -0.069166667 | 0.222533333  | -0.124966667 | 0.006866667  |
| E2F1         | 0.060866667  | -0.006866667 | 0.140566667  | -0.122533333 | -0.040666667 |
| FOXO3        | -0.071033333 | 0.0351       | 0.010066667  | -0.1545      | -0.072533333 |
| TINP1        | 0.038866667  | 0.033633333  | -0.005833333 | -0.046166667 | 0.000233333  |
| SMA5         | 0.0976       | -0.0053      | 0.032166667  | -0.045666667 | -0.173       |
| PNPLA6       | -0.3319      | -0.015433333 | 0.274866667  | -0.340166667 | -0.149466667 |
| LOC100134504 | -0.284433333 | 0.154733333  | -0.1318      | -0.260766667 | -0.080033333 |
| SPRY1        | -0.073033333 | 0.0992       | 0.560933333  | -0.041066667 | 0.099633333  |
| LAMA4        | -0.214066667 | -0.101033333 | 0.3888       | -0.278       | -0.050266667 |
| C2orf68      | -0.224066667 | -0.023566667 | 0.038366667  | -0.3708      | -0.080366667 |
| LOC100129952 | -0.526633333 | 0.240866667  | -0.574366667 | -0.572066667 | -0.040766667 |
| NUP155       | 0.118533333  | 0.150033333  | -0.017966667 | 0.088633333  | -0.0142      |
| FLJ44124     | -0.0553      | 0.638533333  | -0.147833333 | -0.024666667 | 0.072333333  |
| GTSE1        | 0.2454       | 0.078633333  | 0.037366667  | 0.101666667  | -0.018366667 |
| LOC649497    | -0.105       | -0.365666667 | 0.192633333  | -0.184833333 | -0.331066667 |
| CDC23        | 0.051866667  | 0.048        | 0.0279       | 0.009366667  | -0.0253      |
| NDFIP1       | 0.0178       | -0.1094      | 0.0718       | -0.1453      | -0.053366667 |
| LOC728903    | -0.141766667 | 0.701566667  | -0.011366667 | -0.15        | 0.326733333  |
| SLC9A8       | -0.053566667 | -0.0824      | 0.002466667  | -0.0794      | -0.166333333 |
| ORC2L        | 0.003066667  | 0.089133333  | 0.128266667  | -0.100966667 | 0.027566667  |
| NDUFA1       | -0.068966667 | -0.0389      | 0.126733333  | -0.175866667 | -0.107566667 |

|           |              |              |              |              |              |
|-----------|--------------|--------------|--------------|--------------|--------------|
| SOX10     | -0.027733333 | -0.377366667 | 0.5579       | -0.1325      | -0.053466667 |
| PAN3      | -0.063733333 | 0.0643       | 0.102766667  | 0.004433333  | -0.139066667 |
| LOC653487 | -0.168966667 | 0.047166667  | -0.059533333 | -0.070666667 | -0.212266667 |
| INTS2     | 0.0926       | -0.0103      | 0.1067       | -0.123566667 | 0.054333333  |
| LITAF     | -0.152766667 | -0.166166667 | 0.1266       | -0.064966667 | -0.2322      |
| EEF1AL7   | -0.053366667 | 0.033933333  | 0.041966667  | -0.090466667 | -0.059566667 |
| GTF3C1    | 0.1159       | -0.0012      | 0.112933333  | -0.049233333 | 0.031233333  |
| LOC647037 | -0.114566667 | 0.130566667  | -0.055633333 | -0.1356      | 0.032533333  |
| CCNYL1    | 0.160233333  | 0.0954       | -0.034366667 | 0.0618       | -0.0286      |
| C21orf55  | -0.133866667 | 0.536866667  | -0.0693      | -0.0567      | 0.0753       |
| TSC22D3   | -0.4501      | -0.390233333 | -0.110533333 | -0.316566667 | -0.420766667 |
| TBC1D17   | -0.064566667 | -0.1587      | 0.090766667  | -0.132033333 | -0.097       |
| DYNC1H1   | 0.166766667  | -0.063833333 | 0.0114       | -0.159233333 | -0.2267      |
| TTC37     | -0.020466667 | -0.076133333 | -0.0024      | -0.117533333 | -0.176633333 |
| SORBS3    | 0.087333333  | 0.0711       | 0.096866667  | 0.010033333  | -0.063       |
| C9orf91   | -0.003166667 | -0.188233333 | -0.141533333 | -0.238033333 | -0.1724      |
| IDH1      | -0.670766667 | -0.175033333 | 0.028866667  | -0.739533333 | -0.361466667 |
| C7orf11   | -0.279333333 | 0.221466667  | -0.085466667 | -0.1648      | 0.039466667  |
| LOC148430 | 0.1783       | -0.0986      | 0.005        | -0.022366667 | -0.0821      |
| ANKRD20A1 | -0.229533333 | -0.024       | 0.234733333  | -0.2016      | -0.071066667 |
| NDNL2     | 0.085        | 0.0302       | 0.120966667  | 0.1343       | -0.126166667 |
| PIGN      | -0.031133333 | 0.0098       | 0.0455       | -0.048266667 | -0.1171      |
| C1orf83   | 0.0062       | -0.008       | 0.010566667  | -0.076       | -0.085833333 |
| C12orf66  | -0.028366667 | 0.073166667  | -0.018733333 | -0.024833333 | -0.174       |
| EXOC8     | -0.091366667 | 0.121        | -0.066433333 | -0.1244      | 0.029966667  |
| NDUFB7    | -0.000133333 | -0.235333333 | 0.090566667  | -0.126833333 | -0.1125      |
| UFC1      | -0.0757      | -0.0335      | 0.0286       | -0.1367      | -0.080033333 |
| NAPRT1    | -0.306266667 | -0.006833333 | 0.243666667  | -0.214833333 | -0.062333333 |
| LOC729404 | -0.066233333 | 0.034233333  | 0.0789       | -0.150366667 | 0.091        |
| LOC203547 | 0.0197       | 0.052866667  | 0.0831       | -0.089566667 | -0.0308      |
| EXOSC3    | 0.3052       | 0.162933333  | -0.0797      | 0.0783       | 0.048266667  |
| SSTR2     | -0.134466667 | 0.7043       | -0.2686      | -0.1471      | 0.1322       |
| CDC2      | 0.151233333  | 0.171466667  | 0.044533333  | 0.053166667  | -0.0309      |
| LOC730525 | 0.0043       | 0.048433333  | 0.4447       | -0.0767      | 0.303433333  |
| LOC654074 | -0.1117      | 0.185333333  | -0.066466667 | -0.2157      | 0.103133333  |
| DCLRE1C   | -0.225733333 | 0.652        | -0.0971      | -0.016633333 | -0.017133333 |
| ITGAE     | -0.012933333 | 0.063166667  | -0.113066667 | -0.0445      | -0.067066667 |
| NAIF1     | 0.028933333  | 0.049933333  | 0.152166667  | -0.1169      | 0.033466667  |
| HIF1AN    | -0.0563      | -0.000766667 | 0.126866667  | -0.115966667 | -0.082666667 |
| CARD10    | 0.498966667  | 0.013166667  | -0.1397      | 0.144033333  | -0.031533333 |
| MRPL27    | 0.251633333  | 0.127333333  | -0.001033333 | 0.1675       | -0.086266667 |
| C21orf2   | 0.0986       | -0.116766667 | -0.036466667 | -0.1242      | -0.031166667 |
| RAB33B    | 0.027133333  | -0.1556      | 0.1134       | -0.073766667 | -0.126066667 |
| LOC643167 | 0.231033333  | 0.267133333  | -0.1428      | 0.171566667  | -0.057933333 |
| LOC554206 | -0.0032      | -0.091633333 | 0.0517       | -0.1736      | -0.122866667 |
| ISG20L1   | 0.4518       | 0.110233333  | 0.1489       | 0.2257       | 0.025633333  |
| HSCB      | 0.068033333  | 0.384633333  | -0.1049      | 0.0232       | 0.042266667  |



|              |              |              |              |              |              |
|--------------|--------------|--------------|--------------|--------------|--------------|
| USP37        | 0.166566667  | 0.0329       | -0.0269      | 0.013366667  | -0.0897      |
| C15orf40     | -0.053633333 | 0.013066667  | -0.055733333 | -0.0431      | -0.0676      |
| SCCPDH       | -0.170133333 | 0.125066667  | 0.051        | -0.148266667 | -0.141933333 |
| ZNF160       | -0.140866667 | 0.305833333  | 0.0418       | -0.144266667 | 0.0814       |
| LOC100129979 | -0.207733333 | -0.081066667 | 0.0385       | -0.205533333 | -0.297       |
| HAGH         | -0.2816      | -0.000433333 | 0.122266667  | -0.427866667 | 0.084633333  |
| TARBP2       | 0.193666667  | 0.1009       | 0.060066667  | 0.044033333  | 0.079366667  |
| LOC644889    | -0.352066667 | 0.116866667  | 0.021266667  | -0.298233333 | -0.062233333 |
| AGAP8        | 0.1302       | 0.1173       | -0.044966667 | -0.0041      | -0.1169      |
| FRAP1        | -0.019666667 | -0.043433333 | 0.0864       | -0.1578      | -0.0889      |
| MAPKAP1      | 0.1738       | 0.189866667  | -0.118333333 | -0.026866667 | 0.111866667  |
| IPP          | -0.1905      | 0.284233333  | 0.008033333  | -0.194       | 0.054233333  |
| EPOR         | -0.2036      | -0.034933333 | 0.071266667  | -0.206433333 | -0.088033333 |
| BNC2         | 0.425466667  | -0.128933333 | 0.118466667  | 0.138        | -0.0173      |
| HES4         | 0.3462       | -0.166966667 | -0.158033333 | 0.113333333  | -0.1074      |
| RABGAP1      | -0.2162      | -0.0895      | 0.252766667  | -0.1626      | -0.176233333 |
| AHCYL1       | -0.154266667 | 0.046566667  | 0.0887       | -0.232933333 | -0.070333333 |
| MACROD1      | -0.097866667 | -0.153866667 | 0.164166667  | -0.068833333 | -0.196366667 |
| CABLES1      | 0.1762       | -0.001333333 | -0.249       | -0.0297      | -0.0502      |
| CXorf23      | -0.075466667 | -0.019866667 | 0.001966667  | -0.0761      | -0.095266667 |
| COPE         | -0.068733333 | -0.321066667 | 0.308633333  | -0.232666667 | -0.078766667 |
| LOC730746    | -0.128633333 | 0.384966667  | -0.008333333 | -0.054966667 | 0.1573       |
| NCOA1        | -0.0616      | -0.196966667 | 0.039766667  | -0.177166667 | -0.146       |
| HMGN4        | -0.0429      | -0.012766667 | 0.083066667  | -0.1422      | 0.0339       |
| MYL6B        | -0.146766667 | -0.0483      | 0.161133333  | -0.291233333 | -0.059366667 |
| FAM83H       | 0.007166667  | -0.022533333 | 0.0566       | -0.1286      | -0.019266667 |
| C12orf51     | -0.137333333 | -0.0061      | 0.050233333  | -0.1956      | -0.0933      |
| HMGN3        | -0.062066667 | -0.018533333 | 0.180133333  | -0.0256      | -0.112566667 |
| UHRF2        | 0.129766667  | 0.149333333  | -0.016033333 | -0.0126      | 0.049566667  |
| FAM10A7      | -0.049033333 | 0.011933333  | 0.106633333  | -0.079666667 | -0.081233333 |
| LOC388076    | -0.274333333 | 0.070466667  | -0.060933333 | -0.2545      | -0.0226      |
| OGFRL1       | 0.317633333  | 0.037933333  | 0.097866667  | 0.1495       | 0.031366667  |
| HBE1         | -0.290666667 | -0.082366667 | 0.217966667  | -0.4339      | 0.020033333  |
| C1orf124     | 0.2788       | 0.2191       | -0.1443      | 0.1871       | 0.074466667  |
| C20orf45     | 0.2519       | -0.014466667 | 0.191766667  | 0.064466667  | -0.028366667 |
| ATP5H        | -0.019633333 | -0.0606      | 0.105133333  | -0.0789      | -0.091766667 |
| LOC441743    | -0.207433333 | -0.0342      | 0.0023       | -0.101133333 | -0.124233333 |
| PKN2         | -0.069166667 | 0.161566667  | 0.141566667  | -0.0609      | 0.043933333  |
| TOMM7        | -0.106866667 | -0.1327      | 0.0347       | -0.191333333 | -0.120666667 |
| LOC645726    | 0.3105       | 0.199566667  | -0.104266667 | 0.114966667  | -0.0652      |
| FLJ39632     | 0.159466667  | 0.1089       | -0.0896      | 0.027833333  | -0.0325      |
| ENPP2        | -0.1128      | 0.0341       | -0.0067      | -0.1575      | -0.0782      |
| RBBP6        | -0.060533333 | 0.013033333  | -0.068133333 | -0.052333333 | -0.0839      |
| ALX1         | -0.145066667 | -0.001933333 | -0.062666667 | -0.2593      | -0.176433333 |
| ZRANB1       | 0.015333333  | 0.043766667  | 0.1488       | 0.0332       | -0.044466667 |
| LOC100131085 | -0.180033333 | 0.094466667  | -0.157066667 | -0.2326      | 0.093733333  |
| BUB1B        | -0.010833333 | 0.3507       | -0.0418      | 0.138333333  | -0.1128      |

|              |              |              |              |              |              |
|--------------|--------------|--------------|--------------|--------------|--------------|
| LOC100131727 | -0.056766667 | -0.081966667 | 0.118366667  | -0.074333333 | -0.185566667 |
| PTPN3        | 0.2315       | 0.143333333  | 0.076666667  | 0.029666667  | -0.007933333 |
| LOC728481    | -0.082033333 | 0.040833333  | 0.088133333  | -0.067033333 | -0.115766667 |
| ACAT1        | -0.018566667 | 0.048933333  | -0.090133333 | -0.2159      | -0.034766667 |
| CPSF6        | 0.138433333  | 0.185        | 0.057733333  | 0.0637       | 0.077166667  |
| LOC646956    | 0.163033333  | 0.3521       | -0.1416      | 0.0675       | 0.062633333  |
| EIF3J        | 0.546833333  | 0.030066667  | 0.024433333  | 0.288333333  | 0.097033333  |
| GKAP1        | -0.316766667 | 0.117533333  | -0.006566667 | -0.320433333 | 0.067033333  |
| C10orf76     | 0.0472       | -0.043166667 | -0.110666667 | -0.1036      | -0.1457      |
| MED27        | 0.4111       | 0.082066667  | -0.0182      | 0.221866667  | -0.013233333 |
| BAZ2B        | -0.176266667 | -0.141166667 | 0.339666667  | -0.150233333 | -0.045633333 |
| LOC123688    | -0.052233333 | 0.632933333  | -0.156533333 | -0.011433333 | 0.037766667  |
| RSF1         | -0.195666667 | 0.156866667  | 0.123833333  | -0.143566667 | 0.117133333  |
| FAM20B       | 0.291833333  | 0.119666667  | 0.0597       | 0.082966667  | -0.008666667 |
| ZNF69        | -0.132066667 | 0.680566667  | 0.048833333  | -0.0291      | 0.069633333  |
| RAN          | 0.440433333  | -0.005833333 | 0.048466667  | 0.137766667  | 0.101266667  |
| CALN1        | 0.1428       | -0.048033333 | 0.015266667  | -0.021333333 | -0.117133333 |
| LOC728037    | 0.224033333  | 0.117333333  | 0.0269       | 0.040133333  | 0.008833333  |
| LOC100130255 | 0.056766667  | 0.0436       | 0.011966667  | -0.1209      | -0.054333333 |
| MRPS26       | 0.269833333  | 0.066333333  | -0.058666667 | 0.043033333  | 0.036666667  |
| DAK          | -0.128666667 | -0.099333333 | 0.185233333  | -0.199533333 | -0.149633333 |
| EYA3         | 0.394133333  | 0.053766667  | -0.0762      | 0.210066667  | -0.166433333 |
| HIST1H2BC    | 0.1638       | 0.241433333  | -0.085533333 | -0.028733333 | -0.0147      |
| RUNDC2C      | -0.2569      | 0.662233333  | -0.2066      | -0.028666667 | -0.105033333 |
| PARP16       | -0.0014      | -0.0043      | 0.030733333  | -0.126033333 | -0.2044      |
| AIFM1        | -0.126866667 | 0.020733333  | -0.0574      | -0.172266667 | -0.160466667 |
| LIN7C        | -0.057       | 0.058366667  | 0.0435       | -0.158966667 | -0.050366667 |
| TRMT11       | 0.2166       | 0.198066667  | -0.065866667 | 0.018966667  | -0.030333333 |
| BOLA3        | 0.1018       | -0.034333333 | 0.0466       | 0.020966667  | -0.12        |
| RABL4        | -0.111333333 | -0.0992      | 0.052933333  | -0.143733333 | -0.224       |
| C19orf43     | 0.182366667  | 0.006466667  | -0.000633333 | -0.004633333 | -0.051       |
| MST1         | -0.275166667 | 0.0863       | -0.009533333 | -0.352633333 | -0.0262      |
| RPAIN        | -0.1377      | -0.048133333 | 0.104433333  | -0.0892      | -0.204533333 |
| C7orf38      | -0.019       | 0.327233333  | -0.025066667 | -0.0165      | 0.045066667  |
| LOC730255    | -0.119433333 | 0.060233333  | -0.014866667 | -0.087133333 | -0.065266667 |
| EIF3CL       | 0.2891       | -0.127233333 | 0.069766667  | 0.0951       | -0.115266667 |
| TEAD3        | 0.011066667  | 0.1154       | -0.001066667 | 0.100233333  | 0.039633333  |
| C5orf54      | -0.0407      | 0.038733333  | 0.0839       | -0.168666667 | 0.081966667  |
| TMED3        | 0.091266667  | -0.0691      | 0.022966667  | -0.0797      | -0.1123      |
| CDKL3        | -0.0199      | -0.0958      | -0.015933333 | -0.337766667 | -0.081033333 |
| LOC643531    | -0.051633333 | -0.1029      | 0.058033333  | -0.172833333 | -0.070666667 |
| FGFRL1       | -0.064133333 | -0.0652      | 0.5527       | -0.268       | 0.0492       |
| USP22        | 0.289366667  | 0.0506       | -0.081       | 0.0265       | -0.0876      |
| ZNF35        | 0.257033333  | 0.1623       | -0.119233333 | 0.1584       | -0.100333333 |
| LOC100128548 | -0.1362      | 0.187566667  | -0.174433333 | -0.218666667 | 0.123066667  |
| LOC163233    | -0.0601      | 0.625266667  | -0.131466667 | -0.014466667 | 0.271433333  |
| C10orf32     | -0.058033333 | -0.021033333 | -0.047       | -0.0418      | -0.209233333 |

|              |              |              |              |              |              |
|--------------|--------------|--------------|--------------|--------------|--------------|
| PRR11        | 0.231633333  | -0.054966667 | 0.2958       | 0.170666667  | -0.032433333 |
| FASTKD5      | 0.3271       | 0.1712       | -0.041433333 | 0.108433333  | 0.128633333  |
| ZNF642       | 0.121933333  | 0.124766667  | -0.205633333 | -0.1037      | 0.021533333  |
| LOC653086    | -0.081033333 | 0.5258       | -0.2314      | -0.2433      | 0.181233333  |
| C19orf47     | 0.2941       | 0.169466667  | -0.028166667 | 0.191066667  | -0.045833333 |
| ZNF681       | 0.055633333  | 0.190833333  | 0.0083       | 0.056133333  | -0.031333333 |
| ZFP106       | 0.142033333  | 0.0128       | 0.111466667  | 0.090433333  | -0.029066667 |
| GLB1L2       | 0.406033333  | -0.117766667 | -0.070166667 | 0.0446       | -0.112466667 |
| LOC730324    | -0.036933333 | -0.1314      | -0.0343      | -0.135433333 | -0.186166667 |
| EML1         | 0.2677       | -0.0538      | -0.055633333 | 0.1463       | -0.1619      |
| ADCY9        | 0.1237       | -0.055466667 | 0.058333333  | -0.063733333 | -0.091033333 |
| COX19        | 0.0374       | 0.3882       | -0.208833333 | -0.006666667 | -0.035266667 |
| CLTA         | 0.0756       | 0.068666667  | -0.1246      | 0.044466667  | -0.118033333 |
| KCNN4        | -0.140666667 | 0.111433333  | 0.554333333  | -0.184766667 | 0.097166667  |
| RG9MTD3      | -0.0592      | 0.0507       | -0.033866667 | -0.116033333 | -0.023633333 |
| LOC401252    | -0.3144      | 0.522        | -0.163066667 | -0.104533333 | 0.012133333  |
| LOC729677    | -0.258533333 | 0.161        | -0.358633333 | -0.434533333 | 0.138166667  |
| ACSF2        | -0.229766667 | -0.0898      | 0.346533333  | -0.172       | -0.116433333 |
| UBE4B        | -0.1306      | 0.0887       | 0.0958       | -0.018       | -0.108233333 |
| CCDC104      | -0.407133333 | 0.148666667  | -0.0266      | -0.289666667 | -0.1191      |
| BST2         | -0.010966667 | -0.022533333 | 0.2455       | -0.036066667 | -0.138433333 |
| LOC100127993 | -0.026866667 | -0.043366667 | 0.058033333  | 0.0387       | -0.221066667 |
| LOC728244    | -0.0509      | 0.127366667  | -0.0956      | -0.120166667 | -0.0182      |
| LOC650826    | 0.071466667  | -0.051833333 | -0.0515      | -0.222166667 | -0.0163      |
| LOC642033    | 0.121533333  | 0.0765       | 0.174633333  | 0.177133333  | -0.0675      |
| ARL6IP5      | -0.5284      | -0.0919      | 0.2554       | -0.5179      | -0.0696      |
| FANCL        | 0.1518       | 0.016866667  | 0.137        | -0.087433333 | -0.0078      |
| AP2A2        | 0.083666667  | 0.098066667  | -0.057433333 | -0.143433333 | 0.0224       |
| APAF1        | 0.1767       | 0.1394       | 0.0848       | -0.082366667 | 0.1223       |
| FAM91A2      | -0.055366667 | 0.278233333  | 0.059466667  | 0.054433333  | 0.036833333  |
| LOC100133999 | -0.084566667 | 0.137333333  | 0.2028       | -0.0584      | -0.0198      |
| FLJ35390     | -0.258733333 | 0.669        | -0.284833333 | -0.248433333 | 0.031666667  |
| VPS33B       | -0.046166667 | 0.056033333  | 0.036633333  | -0.085066667 | -0.118166667 |
| MAGT1        | -0.2579      | 0.646366667  | 0.003633333  | -0.085733333 | 0.191933333  |
| TM9SF1       | -0.063666667 | -0.0493      | 0.094233333  | -0.0412      | -0.248866667 |
| LOC442442    | 0.0327       | 0.128333333  | -0.1417      | -0.108033333 | 0.090766667  |
| DAAM1        | -0.033766667 | 0.2446       | -0.0296      | -0.043866667 | 0.188133333  |
| HIST1H2AC    | 0.0354       | 0.006966667  | 0.158333333  | -0.003366667 | -0.064633333 |
| LSM7         | 0.1994       | 0.0697       | 0.071533333  | -0.0189      | 0.025166667  |
| HDGF         | 0.0159       | 0.099066667  | 0.0798       | -0.050333333 | 0.0249       |
| ZNF813       | 0.027        | 0.036133333  | -0.015666667 | -0.147133333 | 0.0322       |
| DGUOK        | -0.177766667 | -0.1326      | 0.183566667  | -0.196133333 | -0.108933333 |
| LOC100134584 | -0.136633333 | 0.028433333  | 0.314        | 0.053866667  | -0.1136      |
| RBM27        | 0.0958       | -0.0681      | 0.0097       | 0.011533333  | 0.0469       |
| ZNF583       | 0.171433333  | 0.100833333  | -0.071366667 | 0.150966667  | -0.0905      |
| IMPAD1       | 0.144233333  | 0.070066667  | 0.023233333  | 0.000566667  | 0.019933333  |
| METT11D1     | 0.252433333  | 0.240333333  | -0.166366667 | 0.154766667  | 0.071966667  |

|              |              |              |              |              |              |
|--------------|--------------|--------------|--------------|--------------|--------------|
| LOC727768    | -0.018333333 | -0.0301      | 0.030366667  | -0.103466667 | -0.073166667 |
| PIN1         | -0.129233333 | 0.0485       | 0.0254       | -0.151766667 | -0.082633333 |
| FIBP         | -0.1473      | -0.144233333 | 0.164066667  | -0.2249      | -0.138166667 |
| C11orf59     | -0.002633333 | -0.0882      | 0.083033333  | -0.055233333 | -0.0187      |
| LOC729646    | -0.004366667 | -0.048333333 | -0.011533333 | -0.107466667 | -0.047033333 |
| TARSL2       | -0.041933333 | 0.0254       | 0.028566667  | -0.127433333 | -0.087166667 |
| TLK1         | -0.037833333 | 0.0317       | 0.070066667  | -0.073766667 | -0.0265      |
| UBE2L3       | 0.123533333  | 0.079533333  | 0.128933333  | -0.0593      | 0.1647       |
| LOC100131541 | -0.221966667 | 0.680766667  | -0.064033333 | -0.213766667 | 0.295466667  |
| NUDCD2       | -0.140666667 | 0.218366667  | -0.1027      | -0.2265      | 0.072633333  |
| TMEM222      | -0.021766667 | -0.010533333 | 0.026066667  | 0.046666667  | -0.1311      |
| SURF1        | -0.255366667 | 0.025166667  | 0.117466667  | -0.2861      | -0.064833333 |
| LOC653344    | -0.055933333 | 0.013        | -0.123633333 | -0.236566667 | -0.1075      |
| TMEM187      | -0.229633333 | -0.146566667 | 0.086566667  | -0.210933333 | -0.105733333 |
| LOC342994    | -0.0624      | 0.0182       | -0.1422      | -0.328433333 | 0.1074       |
| CAPRIN1      | 0.268666667  | -0.020566667 | 0.1292       | 0.2267       | -0.136366667 |
| MAP4K4       | 0.0743       | 0.0962       | 0.2456       | -0.014       | -0.051333333 |
| ANGEL1       | 0.000233333  | -0.0399      | 0.1077       | -0.1442      | -0.078666667 |
| LOC643911    | -0.180266667 | 0.007566667  | -0.230333333 | -0.144366667 | -0.089333333 |
| ZNF586       | 0.218666667  | -0.0887      | -0.063733333 | 0.043233333  | -0.119866667 |
| C15orf24     | 0.2082       | -0.054233333 | -0.018466667 | 0.062933333  | -0.0776      |
| FAM91A1      | 0.199766667  | 0.1731       | 0.023466667  | 0.1069       | 0.028266667  |
| LOC642299    | -0.000866667 | 0.1353       | -0.009333333 | -0.0883      | 0.067        |
| LOC391769    | -0.248333333 | 0.306933333  | -0.3196      | -0.354866667 | 0.213666667  |
| PFTK1        | 0.0379       | 0.018266667  | 0.1617       | -0.034866667 | -0.0775      |
| HCFC1        | 0.283933333  | 0.025533333  | -0.070666667 | 0.060266667  | -0.0949      |
| MFSD3        | -0.5011      | -0.2422      | 0.3189       | -0.635066667 | -0.095566667 |
| LOC100129441 | -0.104766667 | 0.277933333  | 0.137966667  | 0.051433333  | -0.146233333 |
| AUTS2        | 0.068466667  | 0.203033333  | -0.0074      | -0.0448      | 0.004366667  |
| LOC729423    | 0.224166667  | 0.180833333  | -0.087466667 | 0.1635       | -0.1088      |
| MPG          | -0.010166667 | -0.019       | 0.1516       | -0.160233333 | 0.005866667  |
| RAB32        | 0.008533333  | -0.0323      | -0.1125      | -0.115466667 | -0.1912      |
| TEX261       | 0.135066667  | 0.152266667  | -0.0399      | -0.053433333 | 0.053966667  |
| CDC14B       | 0.057433333  | 0.120966667  | -0.0383      | 0.0053       | -0.050333333 |
| BAK1         | 0.105166667  | 0.123        | 0.165666667  | 0.195033333  | -0.071866667 |
| LOC400455    | 0.149866667  | 0.0174       | -0.0773      | -0.026933333 | -0.0088      |
| LOC100134011 | 0.0915       | 0.050566667  | 0.009233333  | -0.043766667 | -0.091066667 |
| LBR          | 0.428        | 0.172933333  | -0.073133333 | 0.1616       | -0.0276      |
| KLHDC4       | 0.024366667  | 0.1241       | 0.3566       | -0.037166667 | 0.0351       |
| PCF11        | 0.0458       | 0.211733333  | 0.136466667  | 0.105033333  | 0.080933333  |
| PEX11A       | -0.0793      | -0.050933333 | 0.140866667  | -0.057933333 | -0.1957      |
| LOC642076    | -0.101466667 | 0.273166667  | -0.1299      | -0.038533333 | 0.0515       |
| PEF1         | -0.151933333 | 0.103666667  | -0.035933333 | -0.1836      | -0.005966667 |
| MESP1        | 0.186033333  | 0.0072       | 0.034266667  | -0.049033333 | -0.091766667 |
| CT45A6       | 0.1273       | 0.175866667  | -0.023966667 | 0.1219       | 0.042433333  |
| CRTC2        | 0.1945       | 0.0573       | 0.153566667  | 0.068333333  | 0.0258       |
| ANKS3        | 0.003166667  | 0.127        | 0.042833333  | 0.000933333  | -0.0097      |

|              |              |              |              |              |              |
|--------------|--------------|--------------|--------------|--------------|--------------|
| DSN1         | 0.259566667  | 0.050733333  | -0.060733333 | 0.023333333  | -0.039533333 |
| RPL36AL      | 0.1055       | -0.121033333 | 0.1215       | -0.1001      | -0.1041      |
| LOC646900    | -0.191466667 | 0.139866667  | -0.201033333 | -0.171466667 | -0.083466667 |
| OCRL         | -0.0803      | -0.045       | 0.0033       | -0.151166667 | -0.2734      |
| LOC100133516 | -0.1908      | 0.801066667  | -0.270566667 | -0.1388      | 0.059033333  |
| MAPK7        | 0.1086       | 0.1009       | 0.1091       | 0.012866667  | 0.0388       |
| VCPIP1       | -0.041433333 | 0.074733333  | 0.021        | -0.148033333 | -0.004566667 |
| PDCD4        | -0.167966667 | 0.4467       | -0.100933333 | -0.228466667 | 0.048066667  |
| PTCD2        | -0.006633333 | -0.017433333 | 0.130733333  | -0.108233333 | -0.0577      |
| CNGB1        | -0.065066667 | 0.1472       | 0.047366667  | -0.083       | 0.206033333  |
| NDUFS2       | -0.1904      | 0.248266667  | -0.115533333 | -0.0993      | -0.050766667 |
| FLJ42627     | 0.103133333  | -0.225266667 | 0.068633333  | 0.063733333  | -0.2216      |
| NRBP2        | -0.117433333 | 0.026566667  | 0.0469       | -0.264033333 | -0.042366667 |
| ZNF343       | 0.122466667  | -0.070866667 | 0.0938       | 0.0141       | -0.188       |
| TXNDC15      | -0.035033333 | -0.039933333 | 0.054766667  | -0.2277      | 0.003766667  |
| LOC151579    | 0.1957       | 0.179        | 0.009        | 0.1467       | 0.024066667  |
| ALG10B       | 0.153566667  | 0.010633333  | 0.086466667  | 0.001933333  | 0.1328       |
| MRPL30       | 0.135933333  | 0.166        | 0.028166667  | 0.134        | -0.088466667 |
| TRIM4        | -0.257866667 | -0.201233333 | 0.264466667  | -0.256266667 | -0.1363      |
| ACOT2        | 0.155633333  | -0.178366667 | 0.000533333  | -0.030633333 | -0.115833333 |
| FBXO28       | 0.2284       | -0.0574      | 0.0741       | 0.100766667  | -0.130633333 |
| KIAA1217     | -0.251       | 0.102966667  | 0.224766667  | -0.133733333 | -0.165966667 |
| RPS7         | 0.236266667  | 0.130966667  | -0.092966667 | 0.225933333  | -0.0009      |
| UBQLN2       | -0.017033333 | -0.025966667 | 0.0149       | -0.0921      | 0.017766667  |
| MRPS27       | 0.091266667  | 0.1412       | -0.022966667 | -0.033666667 | 0.005333333  |
| ZNF571       | -0.129166667 | 0.026666667  | -0.080666667 | -0.1625      | -0.049866667 |
| PSMB4        | -0.067166667 | -0.069466667 | 0.1727       | -0.0757      | -0.1498      |
| LPPR2        | -0.085133333 | 0.0035       | 0.138266667  | -0.043333333 | -0.174833333 |
| LOC653829    | -0.148066667 | 0.716666667  | -0.111433333 | -0.143       | 0.133666667  |
| HNRNPU       | -0.045733333 | 0.847633333  | -0.145       | 0.080533333  | 0.198166667  |
| ASB13        | 0.126733333  | -0.0346      | -0.024033333 | -0.0442      | -0.053433333 |
| SHOC2        | 0.0588       | 0.045033333  | -0.0905      | -0.040966667 | -0.021233333 |
| CSTF2T       | 0.001266667  | -0.0756      | 0.086133333  | -0.0502      | -0.043166667 |
| MRPL52       | 0.257        | 0.241033333  | -0.2108      | -0.0304      | 0.129166667  |
| C1orf112     | 0.256933333  | 0.164133333  | 0.033433333  | 0.124766667  | -0.0012      |
| ESPL1        | 0.2212       | 0.100433333  | 0.079        | 0.098066667  | -0.005666667 |
| MTA1         | -0.061466667 | 0.110066667  | 0.076466667  | -0.017766667 | -0.102866667 |
| FBXO5        | 0.398366667  | 0.040233333  | 0.084366667  | 0.115        | -0.044033333 |
| METTL14      | 0.0869       | 0.096433333  | 0.070333333  | 0.085833333  | -0.103433333 |
| L1CAM        | 0.134533333  | -0.211133333 | 0.0273       | 0.040066667  | -0.244233333 |
| LOC153561    | -0.001733333 | 0.235666667  | 0.124366667  | -0.083833333 | 0.0343       |
| PAN2         | -0.397766667 | 0.0841       | 0.0545       | -0.347733333 | -0.094266667 |
| LOC100129426 | -0.049166667 | 0.150166667  | -0.099566667 | -0.131866667 | 0.040833333  |
| STK3         | 0.2633       | 0.046366667  | 0.036866667  | 0.146366667  | 0.039833333  |
| LOC730455    | 0.014733333  | 0.052        | 0.087133333  | -0.1511      | -0.052733333 |
| CMTM3        | 0.300233333  | 0.0657       | 0.152266667  | 0.046766667  | -0.0521      |
| PERP         | -0.235233333 | -0.042366667 | -0.094966667 | -0.314433333 | -0.037633333 |

|                |              |              |              |              |              |
|----------------|--------------|--------------|--------------|--------------|--------------|
| MACF1          | 0.196766667  | 0.114533333  | 0.4365       | 0.075033333  | -0.045766667 |
| RAB3GAP1       | -0.132066667 | -0.043533333 | 0.0486       | -0.160266667 | -0.066866667 |
| ZNF600         | -0.0223      | 0.5073       | -0.1474      | 0.078233333  | 0.159066667  |
| TMEM189-UBE2V1 | 0.190533333  | 0.063866667  | -0.054533333 | -0.027733333 | -0.090866667 |
| ENY2           | 0.192933333  | 0.010266667  | 0.069833333  | 0.065766667  | 0.032366667  |
| LOC100133923   | 0.029833333  | -0.081366667 | 0.3135       | 0.017533333  | -0.096       |
| WDFY1          | -0.0628      | -0.340533333 | 0.066933333  | -0.1605      | -0.094533333 |
| FBXW4          | -0.239533333 | -0.113733333 | 0.071566667  | -0.2747      | -0.096666667 |
| MED21          | -0.162866667 | 0.138566667  | 0.083        | -0.0818      | 0.0196       |
| TMEM109        | 0.455        | 0.084966667  | -0.017033333 | 0.234233333  | -0.044166667 |
| MGC15763       | 0.200366667  | 0.032666667  | -0.1436      | -0.0861      | -0.0544      |
| PCBP2          | 0.093533333  | 0.0431       | -0.108933333 | -0.138466667 | -0.115166667 |
| PGCP           | -0.021433333 | -0.060666667 | 0.187566667  | -0.149433333 | -0.0032      |
| CTNNA1         | -0.0499      | 0.018933333  | 0.0295       | -0.1923      | -0.0163      |
| TSC2           | -0.076633333 | -0.140133333 | 0.056733333  | -0.077233333 | -0.1956      |
| SNORD3A        | 0.068066667  | -0.0073      | 0.0883       | 0.041133333  | -0.0912      |
| SLC39A3        | 0.213233333  | 0.055966667  | -0.082466667 | 0.110966667  | -0.0171      |
| LOC572558      | 0.075333333  | 0.230466667  | -0.045       | -0.0498      | 0.1111       |
| LOC644424      | -0.003866667 | 0.240766667  | -0.018866667 | 0.028466667  | -0.003533333 |
| CTDSP1         | -0.016066667 | 0.0841       | 0.210933333  | -0.031633333 | -0.0678      |
| PRSS23         | 0.214133333  | -0.149433333 | -0.824766667 | 0.125533333  | -0.408733333 |
| LOC728672      | -0.101866667 | 0.125        | -0.204       | -0.169766667 | -0.0982      |
| LOC644124      | 0.064366667  | 0.046166667  | -0.0467      | -0.059433333 | -0.092033333 |
| FOXJ2          | 0.1442       | -0.016966667 | 0.0116       | -0.0074      | -0.073133333 |
| METTL9         | -0.060933333 | 0.109333333  | 0.066766667  | -0.070933333 | -0.050866667 |
| ZNF225         | -0.011666667 | 0.165933333  | 0.017133333  | -0.019       | -0.090166667 |
| DNAH14         | 0.0273       | 0.210566667  | 0.0375       | -0.088266667 | 0.073266667  |
| LOC727948      | 0.020066667  | 0.358766667  | -0.0482      | 0.025266667  | 0.066766667  |
| LOC284393      | 0.0084       | -0.095966667 | 0.050033333  | -0.1611      | -0.051466667 |
| PLD2           | 0.0392       | 0.0311       | 0.0298       | 0.070433333  | -0.0976      |
| ZNF75A         | -0.254133333 | 0.049633333  | 0.0088       | -0.260466667 | -0.007933333 |
| LOC653884      | 0.096766667  | 0.152966667  | 0.079766667  | 0.0032       | 0.115066667  |
| FNDC4          | -0.067233333 | 0.0341       | 0.122133333  | -0.195966667 | -0.034166667 |
| SLC35D2        | -0.217733333 | 0.0678       | 0.177733333  | -0.134666667 | -0.1529      |
| SIN3A          | 0.080433333  | 0.075        | 0.202433333  | 0.062266667  | 0.017233333  |
| GOLGA1         | -0.025633333 | 0.0133       | 0.016666667  | -0.032466667 | -0.162233333 |
| ALMS1          | 0.112233333  | 0.028        | 0.0217       | 0.095866667  | 0.000333333  |
| CKAP5          | 0.1488       | 0.037933333  | 0.101466667  | 0.0643       | -0.097566667 |
| MAPK6          | 0.151933333  | -0.034633333 | 0.061566667  | -0.017666667 | 0.033633333  |
| LOC100128410   | 0.0456       | 0.348233333  | -0.254866667 | 0.0916       | -0.103333333 |
| DERA           | -0.142133333 | -0.04        | 0.109133333  | -0.215266667 | -0.0865      |
| C2orf37        | 0.156866667  | 0.039966667  | -0.052233333 | -0.058733333 | -0.040766667 |
| C5orf39        | -0.021033333 | -0.022966667 | 0.0864       | -0.098066667 | -0.1298      |
| ADAL           | -0.054033333 | 0.017033333  | -0.003966667 | -0.139166667 | -0.0395      |
| 5-Sep          | -0.1686      | -0.1538      | 0.1715       | -0.201666667 | -0.256933333 |
| SMARCAD1       | 0.043866667  | -6.67E-05    | 0.153933333  | -0.0777      | 0.046566667  |
| STX2           | 0.256033333  | 0.070633333  | 0.058433333  | 0.0015       | -0.027466667 |

|              |              |              |              |              |              |
|--------------|--------------|--------------|--------------|--------------|--------------|
| CAPG         | -0.207533333 | -0.008733333 | 0.091233333  | -0.318333333 | -0.037133333 |
| LOC643387    | 0.118333333  | 0.319466667  | -0.006133333 | -0.059233333 | 0.119833333  |
| RNF217       | 0.1287       | -0.132266667 | 0.0947       | 0.041466667  | -0.125566667 |
| ZNF254       | 0.018733333  | -0.0357      | 0.108333333  | -0.0649      | -0.179833333 |
| ANKDD1A      | 0.066566667  | 0.033166667  | 0.081233333  | -0.077066667 | -0.027433333 |
| PRR4         | 0.020166667  | 0.089533333  | 0.286533333  | 0.131366667  | -0.0774      |
| ITGA6        | -0.034566667 | 0.211833333  | 0.276566667  | -0.040466667 | 0.076533333  |
| C16orf91     | 0.356233333  | 0.043366667  | -0.0222      | 0.280733333  | -0.062766667 |
| ERCC2        | 0.127033333  | -0.0383      | 0.154033333  | -0.099966667 | 0.033233333  |
| TMOD2        | -0.024466667 | 0.049933333  | -0.0054      | -0.199066667 | 0.046533333  |
| AEBP2        | 0.104433333  | 0.2963       | 0.1717       | 0.0959       | 0.075033333  |
| LOC374395    | -0.4195      | -0.042233333 | 0.205466667  | -0.410366667 | -0.079233333 |
| PON2         | 0.0485       | -0.076066667 | 0.056533333  | -0.080733333 | -0.088433333 |
| CUL7         | -0.283866667 | 0.034333333  | 0.017766667  | -0.170533333 | -0.199033333 |
| OCIAD1       | -0.186766667 | 0.460966667  | 0.020833333  | -0.2558      | 0.126033333  |
| CAMLG        | -0.1186      | -0.1119      | 0.202333333  | -0.0983      | -0.097333333 |
| RRBP1        | -0.0843      | 0.0693       | 0.1773       | -0.1225      | -0.025733333 |
| ANXA1        | 0.033866667  | 0.084366667  | 0.176433333  | 0.029133333  | -0.041266667 |
| ANGEL2       | -0.096666667 | 0.007266667  | -0.0759      | -0.198866667 | -0.0704      |
| ISG20L2      | 0.284766667  | 0.120166667  | 0.052533333  | 0.2271       | 0.009666667  |
| LUC7L        | 0.1789       | 0.128333333  | -0.007733333 | 0.078366667  | 0.060333333  |
| TMEM80       | -0.0744      | -0.110333333 | -0.002533333 | -0.182633333 | -0.1764      |
| LOC645715    | -0.250366667 | 0.239633333  | -0.281733333 | -0.2957      | 0.065866667  |
| LOC645018    | -0.529766667 | 0.096133333  | -0.427866667 | -0.622733333 | 0.0788       |
| AATK         | 0.1374       | 0.093666667  | 0.060933333  | 0.013833333  | 0.062066667  |
| SEMA4F       | -0.002933333 | -0.067566667 | 0.082833333  | -0.130866667 | -0.1394      |
| TMEM59       | -0.0712      | -0.091933333 | 0.121766667  | -0.314733333 | 0.056666667  |
| LOC728732    | 0.115766667  | 0.068633333  | 0.0456       | -0.0742      | 0.062933333  |
| LOC100130919 | 0.300166667  | 0.159333333  | 0.040266667  | 0.133366667  | 0.0235       |
| TAF2         | 0.061866667  | 0.168766667  | 0.042133333  | -0.018133333 | 0.035633333  |
| CPSF3L       | 0.1106       | -0.006766667 | 0.1277       | -0.068966667 | -0.124266667 |
| C7orf50      | -0.0575      | 0.0701       | -0.046933333 | -0.141933333 | -0.050733333 |
| ATP7A        | -0.078633333 | 0.0113       | 0.1555       | -0.1342      | -0.052866667 |
| TAX1BP1      | -0.4461      | 0.039266667  | 0.1098       | -0.383833333 | -0.158266667 |
| PCDHB9       | -0.1974      | 0.6585       | -0.248833333 | -0.1503      | 0.0594       |
| C7orf47      | -0.244733333 | 0.008366667  | 0.2569       | -0.202566667 | -0.078833333 |
| UBE2F        | 0.0258       | 0.079833333  | 0.092233333  | -0.126033333 | 0.046333333  |
| KLHL12       | -0.247666667 | -0.0387      | -0.038666667 | -0.282033333 | -0.125466667 |
| FOXRED1      | 0.067566667  | 0.1203       | 0.008266667  | -0.084666667 | -0.0972      |
| LOC100132535 | -0.152233333 | -0.1237      | 0.356733333  | -0.116333333 | -0.126266667 |
| VPS11        | -0.088866667 | 0.010066667  | 0.056033333  | -0.187966667 | -0.167833333 |
| ASPSCR1      | -0.164733333 | -0.008233333 | -0.020733333 | -0.2047      | -0.072       |
| LOC644315    | -0.447366667 | 0.165866667  | -0.387033333 | -0.5596      | 0.123166667  |
| CHD7         | 0.505566667  | 0.006        | 0.084233333  | 0.3482       | -0.0533      |
| C11orf24     | 0.113666667  | 0.0535       | 0.071466667  | -0.038066667 | 0.015433333  |
| LSM8         | 0.056766667  | 0.061666667  | -0.091633333 | -0.0487      | -0.094666667 |
| TXNDC17      | 0.008533333  | 0.004266667  | 0.127633333  | -0.053966667 | 0.0104       |

|              |              |              |              |              |              |
|--------------|--------------|--------------|--------------|--------------|--------------|
| HMGCR        | 0.046033333  | -0.064366667 | 0.0303       | -0.115266667 | -0.111333333 |
| CEP192       | 0.1981       | 0.0971       | -0.010433333 | -0.103166667 | -0.018966667 |
| ZNF75D       | -0.0169      | 0.0638       | 0.033433333  | 0.034966667  | -0.1767      |
| WDR37        | 0.05         | 0.143433333  | -0.000333333 | 0.0454       | 0.1061       |
| PITRM1       | 0.190133333  | 0.0459       | -0.0833      | -0.043333333 | 0.027166667  |
| MBIP         | -0.064666667 | 0.180833333  | 0.128266667  | -0.0198      | -0.045733333 |
| RPS27        | -0.0824      | -0.166733333 | -0.006933333 | -0.147533333 | -0.2867      |
| CBX1         | 0.2108       | 0.250233333  | -0.034266667 | 0.1296       | -0.076766667 |
| LOC646841    | -0.290333333 | 0.186566667  | -0.396166667 | -0.366133333 | -0.0044      |
| CTNNAL1      | 0.165833333  | 0.0275       | 0.117233333  | 0.047733333  | 0.032566667  |
| C14orf78     | -0.2463      | -0.0902      | 0.1097       | -0.2623      | -0.1684      |
| LOC641814    | 0.086266667  | 0.0133       | 0.000633333  | 0.077166667  | -0.139666667 |
| IRS1         | 0.2927       | 0.062233333  | 0.04         | 0.1987       | -0.024866667 |
| TYSND1       | 0.1009       | 0.0566       | -0.090466667 | -0.1667      | 0.044333333  |
| LZTR1        | -0.142833333 | -0.031666667 | 0.140433333  | -0.208033333 | -0.0957      |
| ELAC1        | -0.059       | 0.050933333  | 0.012633333  | -0.1889      | -0.080133333 |
| LOC388401    | -0.528233333 | 0.197566667  | -0.508466667 | -0.5809      | 0.061166667  |
| LOC728693    | 0.1457       | -0.080133333 | 0.021266667  | -0.0659      | -0.047633333 |
| RAD23B       | 0.280933333  | 0.0978       | -0.020833333 | 0.288066667  | -0.147766667 |
| MTMR14       | -0.158933333 | 0.048633333  | 0.041533333  | -0.219966667 | -0.128433333 |
| LOC439992    | -0.619566667 | 0.359333333  | -0.476733333 | -0.510566667 | 0.0849       |
| ALKBH4       | 0.0625       | -0.063466667 | 0.017933333  | -0.0904      | -0.067033333 |
| KIAA0196     | -0.081033333 | -0.018       | 0.173333333  | -0.064333333 | -0.1193      |
| CCDC112      | 0.0844       | 0.0252       | -0.0105      | -0.031666667 | -0.0726      |
| C9orf130     | -0.054266667 | 0.505933333  | -0.304266667 | -0.0349      | 0.060366667  |
| SMC2         | 0.311633333  | 0.123233333  | -0.116166667 | 0.136266667  | -0.062       |
| LOC645944    | -0.050933333 | 0.098133333  | -0.064166667 | -0.070166667 | -0.1472      |
| MIR599       | 0.064066667  | 0.076        | 0.017433333  | 0.044633333  | -0.2063      |
| RPS26        | 0.386766667  | 0.279        | -0.223866667 | 0.171233333  | 0.0911       |
| TECPR1       | -0.113566667 | 0.002533333  | 0.242366667  | -0.1393      | -0.075633333 |
| DHRS4        | -0.206033333 | -0.117233333 | 0.0882       | -0.3075      | -0.193066667 |
| INPP5E       | -0.069733333 | -0.1526      | -0.0737      | -0.1589      | -0.3078      |
| NUDCD3       | 0.0493       | -0.053633333 | 0.134666667  | -0.1407      | -0.0985      |
| LOC100128098 | -0.120366667 | 1.1086       | -0.164266667 | -0.0087      | 0.333166667  |
| SCLT1        | 0.066533333  | 0.0016       | 0.146933333  | 0.164466667  | -0.187466667 |
| BTBD2        | -0.245466667 | -0.0933      | 0.330333333  | -0.396833333 | 0.050966667  |
| LOC100134291 | -0.1172      | 0.117966667  | -0.011766667 | -0.061166667 | -0.0432      |
| LOC649839    | -0.4293      | -0.017966667 | -0.394366667 | -0.5197      | -0.170666667 |
| FAT3         | 0.139133333  | 0.213566667  | -0.254366667 | 0.154133333  | -0.091266667 |
| IDO2         | -0.088133333 | 0.2149       | 0.076766667  | -0.086866667 | -0.0456      |
| STARD7       | 0.297733333  | 0.228766667  | -0.008733333 | 0.224866667  | 0.0087       |
| SLC41A1      | 0.3199       | 0.0097       | -0.046366667 | 0.150166667  | -0.0769      |
| SRBD1        | -0.0379      | 0.154733333  | -0.003766667 | -0.085433333 | -0.0517      |
| PHLPP1       | -0.052866667 | 0.0339       | 0.126466667  | -0.2001      | -0.016466667 |
| MED14        | -0.019833333 | 0.0956       | 0.042933333  | -0.1419      | -0.007333333 |
| SETD1A       | 0.0746       | -0.007866667 | 0.0293       | -0.123033333 | -0.117566667 |
| LOC100132804 | -0.400133333 | 0.182666667  | -0.288333333 | -0.415266667 | -0.0088      |



|              |              |              |              |              |              |
|--------------|--------------|--------------|--------------|--------------|--------------|
| IL18R1       | 0.1644       | 0.0361       | 0.202866667  | 0.0527       | 0.023266667  |
| LOC728105    | -0.075       | 0.6287       | -0.0803      | -0.097666667 | 0.1123       |
| EIF3L        | 0.055        | -0.169833333 | 0.123233333  | -0.102033333 | -0.190066667 |
| SHKBP1       | -0.154966667 | -0.0632      | 0.148966667  | -0.075933333 | -0.218533333 |
| LOC728368    | -0.097466667 | 0.084533333  | -0.175266667 | -0.144366667 | -0.039466667 |
| COX7A2       | 0.0553       | -0.230766667 | 0.0871       | -0.192833333 | -0.171133333 |
| C5orf28      | 0.148366667  | 0.6597       | -0.063033333 | 0.046366667  | 0.001        |
| CCDC51       | 0.112833333  | 0.175333333  | -0.083433333 | -0.1093      | 0.166933333  |
| LOC649330    | -0.062033333 | 0.348166667  | -0.235333333 | -0.046833333 | -0.0757      |
| PNMA1        | 0.045        | -0.050133333 | -0.010833333 | -0.049233333 | -0.1806      |
| EVI5         | -0.0693      | 0.580133333  | -0.157533333 | -0.064833333 | 0.2131       |
| SPRED1       | 0.12         | -0.1319      | 0.5168       | -0.0731      | 0.126333333  |
| EIF2B4       | -0.065466667 | 0.1107       | 0.099066667  | -0.1507      | 0.033        |
| TERF2        | -0.053433333 | 0.1251       | 0.1149       | 0.0051       | -0.032533333 |
| SIRT1        | 0.199833333  | -0.010866667 | 0.174133333  | 0.2345       | -0.042033333 |
| CNNM3        | 0.164966667  | 0.154133333  | -0.004833333 | -0.012466667 | 0.032133333  |
| CDRT4        | -0.099166667 | -0.054366667 | 0.120966667  | -0.169566667 | -0.124366667 |
| BRCA1        | 0.165933333  | 0.182533333  | 0.005666667  | -0.064366667 | -0.034433333 |
| RFESD        | -0.000166667 | 0.055133333  | 0.035466667  | -0.003       | -0.100233333 |
| NFATC1       | 0.063833333  | 0.0812       | 0.107266667  | 0.025        | -0.068433333 |
| PATE2        | -0.053533333 | 0.795133333  | -0.430766667 | -0.0253      | -0.0156      |
| TFAMP1       | -0.005733333 | 0.062466667  | 0.1443       | -0.060733333 | -0.033466667 |
| C3orf19      | -0.051033333 | -0.082       | -0.0275      | -0.1181      | -0.074       |
| KLHDC3       | -0.071       | 0.09         | 0.1229       | -0.066066667 | -0.0327      |
| PYCR1        | -0.0901      | -0.255533333 | -0.0989      | -0.196033333 | -0.277866667 |
| HNRPUL2      | 0.0393       | -0.007166667 | 0.050133333  | -0.111666667 | -0.023633333 |
| LOC100129034 | 0.0737       | -0.056966667 | 0.0979       | -0.066333333 | -0.118633333 |
| LOC653658    | -0.067       | -0.032333333 | 0.1101       | -0.088       | -0.113766667 |
| C9orf103     | -0.181166667 | -0.091       | 0.070766667  | -0.159033333 | -0.1536      |
| SIGLEC6      | -0.141633333 | 0.3408       | -0.134966667 | -0.2071      | 0.046333333  |
| NFYB         | -0.069433333 | 0.3371       | -0.015166667 | 0.049366667  | -0.095433333 |
| XAF1         | -0.0881      | 0.071766667  | 0.054666667  | 0.010666667  | -0.210733333 |
| PTPN4        | -0.158466667 | 0.0813       | -0.027833333 | -0.074233333 | -0.187366667 |
| HOOK3        | 0.019933333  | 0.013533333  | 0.166566667  | 0.002366667  | -0.076266667 |
| ANXA11       | -0.125166667 | 0.0038       | 0.130133333  | -0.152333333 | -0.130333333 |
| TBCD         | 0.255033333  | -0.0505      | 0.195266667  | 0.044733333  | 0.025533333  |
| OSTCL        | -0.030066667 | 0.247633333  | 0.0718       | -0.138866667 | 0.1154       |
| FLJ25363     | -0.0624      | 0.777833333  | -0.263533333 | -0.0499      | 0.2696       |
| CAPZB        | -0.1323      | 0.000933333  | 0.2626       | -0.2771      | 0.122766667  |
| RPL37A       | 0.101266667  | 0.186166667  | -0.0381      | -0.0212      | -0.0061      |
| BNIP2        | 0.005966667  | 0.067166667  | -0.064666667 | -0.1341      | 0.02         |
| LOC100128627 | 0.072366667  | 0.289866667  | -0.0046      | 0.103333333  | -0.033833333 |
| PHF12        | 0.075033333  | 0.019233333  | 0.0682       | -0.089166667 | 0.042733333  |
| PIGT         | -0.1152      | -0.056433333 | -0.0408      | -0.155566667 | -0.128633333 |
| SMC6         | 0.167566667  | 0.163966667  | 0.064166667  | 0.025066667  | 0.092833333  |
| CCNJL        | 0.135866667  | 0.133433333  | 0.079033333  | 0.171966667  | -0.0588      |
| YBX1         | 0.1008       | 0.130033333  | 0.089566667  | 0.042433333  | 0.088633333  |

|              |              |              |              |              |              |
|--------------|--------------|--------------|--------------|--------------|--------------|
| CUL9         | -0.034866667 | -0.169366667 | 0.1404       | -0.089733333 | -0.204033333 |
| GPC1         | 0.0912       | -0.208833333 | -0.0682      | -0.1086      | -0.146366667 |
| C17orf45     | -0.199533333 | -0.179633333 | 0.0085       | -0.366933333 | -0.211466667 |
| ST6GALNAC3   | -0.366833333 | -0.040633333 | 0.159066667  | -0.4229      | -0.1174      |
| HPSE         | -0.1174      | -0.067133333 | 0.114633333  | -0.2992      | 0.023833333  |
| IBTK         | -0.4061      | -0.0355      | 0.160733333  | -0.3671      | -0.038433333 |
| LOC653717    | -0.062733333 | -0.005       | 0.106533333  | 0.005533333  | -0.182933333 |
| GSTZ1        | -0.2494      | -0.0191      | 0.0836       | -0.1716      | -0.120833333 |
| FAM63A       | -0.1944      | 0.763366667  | 0.054433333  | -0.0776      | 0.183866667  |
| ZBTB8A       | 0.0507       | 0.026066667  | 0.052266667  | -0.077933333 | -0.051       |
| ZDHHC7       | 0.0965       | -0.017366667 | -0.0608      | -0.0965      | -0.213366667 |
| CCL5         | 0.041366667  | 0.131166667  | 0.069        | -0.051033333 | -0.0436      |
| PROSC        | 0.114533333  | -0.0917      | 0.0214       | -0.0676      | -0.053866667 |
| USO1         | -0.3952      | 0.094433333  | 0.2058       | -0.295366667 | -0.0951      |
| FBXL10       | 0.310066667  | 0.0538       | 0.2098       | 0.125533333  | -0.005633333 |
| TRIM39       | 0.152166667  | 0.0284       | -0.021666667 | -0.021533333 | -0.069333333 |
| SERF1B       | 0.058966667  | 0.056133333  | 0.169133333  | 0.0317       | -0.024766667 |
| PEX13        | -0.136666667 | 0.015833333  | 0.074166667  | -0.107166667 | -0.208566667 |
| SGSM3        | -0.1588      | 0.0484       | 0.316533333  | -0.1661      | -0.0449      |
| ZNF334       | -0.148966667 | 0.005833333  | 0.0299       | -0.191533333 | -0.047       |
| SPEN         | 0.392966667  | 0.179633333  | 0.0966       | 0.118866667  | -0.028633333 |
| LOC645737    | -0.5444      | 0.244933333  | -0.588166667 | -0.560033333 | 0.112633333  |
| LOC93622     | 0.2278       | 0.178933333  | -0.124733333 | 0.1038       | -0.004366667 |
| FAM64A       | 0.297333333  | 0.080233333  | 0.092933333  | 0.1879       | -0.0848      |
| LOC388621    | -0.0393      | -0.003133333 | -0.017933333 | -0.1094      | -0.076433333 |
| VAMP2        | 0.1936       | -0.1998      | -0.095833333 | 0.024166667  | -0.290866667 |
| LOC375295    | -0.069466667 | 0.104233333  | -0.008566667 | -0.2281      | -0.003333333 |
| WDYHV1       | 0.062666667  | 0.010033333  | 0.027166667  | -0.0999      | -0.1031      |
| LOC651453    | -0.319766667 | 0.0587       | -0.006       | -0.285433333 | -0.0677      |
| PHF14        | 0.2159       | -0.0013      | -0.0749      | -0.069866667 | 0.015433333  |
| MRPL16       | -0.1674      | 0.114466667  | 0.0958       | -0.166866667 | -0.165466667 |
| EDEM2        | -0.1724      | -0.018466667 | 0.092066667  | -0.278466667 | -0.0731      |
| ZNF138       | 0.159766667  | 0.0356       | 0.039966667  | 0.059766667  | -0.023166667 |
| LOC339970    | -0.1454      | -0.036766667 | 0.073666667  | -0.243833333 | -0.019666667 |
| LOC100129243 | -0.535166667 | 0.3714       | -0.455966667 | -0.517933333 | 0.117533333  |
| FKBP1P1      | 0.119433333  | 0.4712       | 0.024133333  | -0.0492      | 0.185        |
| DAXX         | 0.272566667  | 0.008233333  | 0.194866667  | 0.060666667  | 0.0955       |
| ARL6IP1      | -0.023266667 | 0.3779       | 0.037133333  | 0.053766667  | 0.0124       |
| NDUFB3       | -0.015133333 | 0.004933333  | 0.117533333  | -0.105866667 | -0.052       |
| RALGDS       | -0.0442      | -0.2471      | 0.149533333  | -0.198566667 | -0.086       |
| ALG9         | 0.0401       | 0.2309       | -0.000333333 | -0.017166667 | 0.011966667  |
| LOC389662    | 0.1024       | 0.129266667  | 0.010433333  | -0.066833333 | 0.008866667  |
| LOC100131850 | -0.0444      | 0.0845       | 0.067466667  | 0.065066667  | -0.2447      |
| LOC100129668 | 0.303866667  | 0.047633333  | -0.061666667 | -0.028866667 | 0.059        |
| COX5B        | -0.058966667 | -0.119033333 | 0.141233333  | -0.134       | -0.182133333 |
| ZDHHC16      | 0.179533333  | 0.0901       | 0.052166667  | -0.016766667 | 0.012233333  |
| KLF5         | -0.030633333 | -0.055366667 | -0.3958      | -0.177       | -0.0868      |

|              |              |              |              |              |              |
|--------------|--------------|--------------|--------------|--------------|--------------|
| TNFRSF11B    | -0.152766667 | -0.095466667 | 0.4889       | -0.1466      | 0.016366667  |
| C10orf12     | 0.2043       | 0.134933333  | -0.072       | 0.037633333  | 0.0366       |
| COMMD4       | -0.076666667 | 0.0855       | 0.0393       | -0.1333      | -0.021933333 |
| C7orf26      | 0.089133333  | 0.168566667  | -0.054966667 | 0.024733333  | -0.117633333 |
| LOC100130598 | -0.184533333 | 0.6605       | -0.027433333 | -0.047666667 | 0.170533333  |
| ENTPD7       | 0.1461       | 0.0403       | 0.051833333  | 0.008733333  | -0.088633333 |
| LOC645001    | 0.188966667  | 0.167566667  | -0.029366667 | 0.092133333  | -0.0726      |
| SLC25A42     | -0.594066667 | -0.264233333 | 0.4023       | -0.615333333 | -0.1769      |
| SAP130       | 0.1341       | -0.037566667 | 0.106033333  | 0.046366667  | -0.037633333 |
| KIAA0406     | 0.347166667  | 0.154666667  | 0.135433333  | 0.108266667  | -0.0008      |
| CRTC3        | 0.1342       | -0.031633333 | 0.014533333  | 0.117533333  | -0.2057      |
| LOC643873    | -0.126933333 | 0.1103       | 0.0651       | 0.019633333  | -0.236       |
| LOC650739    | -0.440933333 | 0.2602       | -0.365733333 | -0.604433333 | 0.1755       |
| LOC644113    | 0.081333333  | -0.055466667 | 0.115233333  | -0.021866667 | -0.027966667 |
| TFB1M        | 0.036833333  | 0.221933333  | 0.5809       | -0.176633333 | 0.212033333  |
| LOC143543    | -0.101333333 | 0.261666667  | 0.008233333  | -0.079366667 | 0.029733333  |
| C8orf58      | 0.223133333  | -0.002633333 | 0.072366667  | 0.0901       | -0.075266667 |
| PCDHGC3      | 0.163933333  | 0.192833333  | 0.049633333  | -0.000866667 | -0.0199      |
| CHMP4A       | -0.0987      | 0.051633333  | -0.018666667 | -0.1631      | -0.058033333 |
| JAK2         | 0.172033333  | 0.029033333  | -0.033833333 | -0.0946      | 0.035666667  |
| LOC100132213 | 0.181733333  | -0.0977      | -0.110033333 | -0.211933333 | -0.121833333 |
| LOC730990    | -0.212966667 | 0.890766667  | -0.2667      | -0.115866667 | 0.109433333  |
| ACTG1        | 0.420966667  | -0.164033333 | 0.104933333  | 0.107        | -0.062533333 |
| RCN2         | 0.001        | -0.005233333 | 0.023733333  | -0.142333333 | -0.125366667 |
| LOC728901    | 0.132433333  | -0.0328      | 0.045666667  | -0.0262      | -0.0677      |
| PRKRIP1      | 0.040633333  | 0.126433333  | -0.1181      | 0.029466667  | -0.1716      |
| SUMF2        | -0.212866667 | -0.124133333 | 0.345933333  | -0.237933333 | -0.084766667 |
| LOC100134540 | -0.4612      | 0.2242       | -0.487566667 | -0.535333333 | 0.125666667  |
| LOC641849    | -0.453333333 | 0.215166667  | -0.0052      | -0.312766667 | -0.0544      |
| SLC9A3R1     | 0.070733333  | 0.234366667  | 0.050733333  | 0.043833333  | 0.074633333  |
| SMARCA1      | -0.394       | 0.019033333  | 0.4526       | -0.278       | -0.025733333 |
| C4orf32      | 0.042633333  | -0.189566667 | 0.0772       | -0.141133333 | 0.024733333  |
| GSDMB        | 0.021666667  | 0.3495       | -0.034666667 | -0.001266667 | -0.0456      |
| LOC644733    | 0.197933333  | 0.017966667  | -0.126       | -0.1152      | -0.019666667 |
| NSMCE4A      | 0.1027       | 0.106166667  | 0.057866667  | 0.015433333  | -0.000666667 |
| ZNF577       | 0.041366667  | 0.795133333  | -0.1617      | -0.079833333 | 0.1679       |
| CSF2RA       | -0.307833333 | 0.933166667  | -0.313033333 | -0.242433333 | 0.2324       |
| LOC100129539 | -0.062833333 | 0.275066667  | 0.115        | -0.069933333 | -0.052066667 |
| GNPTAB       | -0.037033333 | -0.0984      | 0.2134       | -0.087266667 | -0.107533333 |
| MLL5         | -0.0036      | 0.035833333  | 0.181966667  | -0.014233333 | -0.0931      |
| KIF20B       | 0.1597       | 0.125133333  | 0.084366667  | 0.078433333  | -0.016433333 |
| LCTL         | -0.320566667 | -0.003933333 | 0.078033333  | -0.416       | -0.120366667 |
| TIGD2        | 0.0809       | 0.0188       | -0.0698      | -0.143833333 | -0.054       |
| CHD6         | -0.1322      | 0.0177       | 0.0331       | -0.203266667 | -0.008833333 |
| LOC729679    | -0.1294      | -0.050533333 | 0.0659       | -0.0957      | -0.0796      |
| SNTA1        | -0.119966667 | 0.083533333  | -0.0286      | -0.1499      | -0.084933333 |
| LOC550643    | -0.223033333 | -0.067       | 0.243466667  | -0.303166667 | -0.048066667 |

|              |              |              |              |              |              |
|--------------|--------------|--------------|--------------|--------------|--------------|
| ESCO1        | 0.077133333  | -0.062866667 | 0.173133333  | -0.0438      | -0.0357      |
| ZNF679       | -0.227666667 | 0.129566667  | 0.079033333  | -0.076933333 | -0.0645      |
| FAM86D       | -0.163166667 | 0.0492       | 0.205766667  | -0.235966667 | 0.126933333  |
| FAM116B      | -0.100666667 | -0.078966667 | 0.1968       | -0.151366667 | -0.028833333 |
| C19orf22     | 0.102633333  | -0.125766667 | -0.057733333 | -0.0291      | -0.187066667 |
| TAF6         | 0.018233333  | 0.183566667  | 0.094966667  | 0.087766667  | -0.050066667 |
| MSC          | 0.02         | -0.1063      | -0.1145      | -0.091633333 | -0.246       |
| RPSA         | -0.161366667 | 0.177933333  | -0.041266667 | -0.222133333 | 0.076433333  |
| SLC7A2       | 0.244166667  | 0.029633333  | 0.0635       | 0.100366667  | -0.1175      |
| POTEE        | 0.217066667  | 0.202633333  | 0.059033333  | 0.080233333  | 0.022333333  |
| SDC1         | 0.3653       | 0.0914       | 0.038166667  | 0.152266667  | 0.011833333  |
| LIG3         | 0.194466667  | 0.0899       | 0.058333333  | 0.074333333  | -0.0428      |
| GTF2A2       | 0.277666667  | 0.0645       | 0.089033333  | 0.000833333  | 0.111166667  |
| ZNF827       | -0.064633333 | 0.009733333  | 0.246466667  | -0.218       | -0.032866667 |
| LOC128192    | -0.069733333 | 0.100333333  | 0.0501       | -0.0085      | -0.089966667 |
| FSIP1        | -0.0761      | 0.080566667  | 0.000266667  | -0.1608      | -0.051666667 |
| KIAA0947     | 0.127066667  | 0.166966667  | -0.012933333 | 0.1398       | -0.0508      |
| PDGFD        | -0.0528      | 0.0338       | 0.143666667  | -0.119466667 | -0.0607      |
| ENO3         | -0.221033333 | 0.051533333  | 0.341733333  | -0.227933333 | -0.017433333 |
| EPM2A        | 0.119933333  | 0.0266       | -0.014333333 | -0.005366667 | -0.032133333 |
| TBX21        | 0.0205       | -0.0444      | 0.179866667  | -0.028166667 | -0.027433333 |
| RTN4R        | 0.006133333  | 0.059033333  | 0.0108       | -0.1403      | -0.086366667 |
| PAQR8        | -0.174833333 | -0.0316      | 0.341866667  | -0.164766667 | -0.069       |
| MIER1        | -0.196766667 | -0.001433333 | 0.190466667  | -0.065033333 | -0.180466667 |
| C14orf153    | -0.0511      | 0.639466667  | -0.036533333 | -0.115533333 | 0.122866667  |
| DHX40        | -0.2834      | 0.005133333  | 0.235066667  | -0.2405      | -0.087566667 |
| TSPAN3       | 0.104        | -0.109133333 | 0.089766667  | -0.104666667 | -0.1479      |
| FAM50B       | -0.139866667 | 0.023533333  | 0.102466667  | -0.366166667 | 0.0427       |
| TAF7         | 0.109266667  | 0.154966667  | -0.034033333 | -0.073566667 | -0.039333333 |
| SPATS2L      | 0.022433333  | 0.1711       | 0.242033333  | 0.1153       | -0.067366667 |
| SMAD3        | 0.319266667  | 0.2135       | 0.412533333  | 0.074133333  | 0.1137       |
| CTGLF7       | -0.083733333 | 0.1254       | 0.160566667  | -0.1884      | 0.1164       |
| CHST12       | -0.073666667 | 0.203033333  | 0.242833333  | -0.006866667 | 0.059233333  |
| LOC388707    | 0.048233333  | -0.044       | 0.1241       | -0.140733333 | 0.080333333  |
| RALGAPA1     | 0.0258       | 0.032266667  | 0.084033333  | -0.091666667 | -0.0288      |
| MICAL1       | -0.117366667 | -0.1029      | 0.120033333  | -0.263033333 | -0.0843      |
| LOC100130818 | 0.0039       | 0.0794       | -0.0114      | -0.029466667 | -0.189966667 |
| PTPLAD1      | 0.1668       | 0.0666       | 0.223566667  | 0.123        | 0.0161       |
| USP11        | -0.0087      | -0.069166667 | 0.2431       | -0.091033333 | 0.087033333  |
| LOC100130932 | 0.158966667  | 0.145233333  | 0.1009       | 0.0802       | 0.0893       |
| CENPH        | 0.2151       | 0.1897       | -0.079666667 | 0.122133333  | 0.039866667  |
| LOC643778    | 0.012466667  | 0.003        | 0.146233333  | -0.0028      | -0.045466667 |
| IGFBP4       | 0.863733333  | 0.074066667  | 0.0534       | 0.645333333  | 0.0525       |
| INO80        | 0.1265       | 0.185366667  | 0.0256       | 0.008033333  | -0.005633333 |
| LOC653580    | 0.116033333  | 0.151633333  | -0.061333333 | -0.116       | 0.026        |
| B4GALNT4     | 0.063066667  | 0.0571       | 0.150333333  | 0.054233333  | -0.0559      |
| ZNF483       | -0.2104      | 0.866066667  | -0.044466667 | -0.219966667 | 0.244033333  |

|              |              |              |              |              |              |
|--------------|--------------|--------------|--------------|--------------|--------------|
| HCST         | -0.138233333 | -0.0941      | 0.251433333  | -0.1542      | -0.144866667 |
| DNAJC30      | -0.0529      | -0.083366667 | 0.0235       | -0.0832      | -0.255033333 |
| SLC38A9      | 0.007533333  | 0.044333333  | -0.088666667 | -0.214       | -0.0141      |
| VWA5A        | -0.046166667 | 0.045833333  | -0.0077      | -0.2836      | 0.0163       |
| KIAA1602     | 0.0697       | -0.0239      | 0.0486       | -0.1276      | 0.014733333  |
| NARG1        | 0.2297       | 0.222533333  | 0.1109       | 0.072233333  | 0.090266667  |
| WDR5B        | -0.0128      | -0.0397      | -0.0884      | -0.245866667 | -0.0926      |
| LOC653383    | 0.186666667  | -0.025533333 | -0.035166667 | 0.048466667  | -0.1651      |
| RAXL1        | -0.1722      | 0.568266667  | -0.187066667 | -0.2411      | 0.1934       |
| NHS          | 0.056633333  | 0.227033333  | 0.070333333  | -0.107666667 | 0.041066667  |
| PDGFR        | -0.076666667 | -0.09        | 0.192766667  | -0.1989      | -0.101333333 |
| BAT1         | 0.190166667  | 0.050766667  | 0.078533333  | 0.0414       | -0.097166667 |
| LOC100128083 | -0.084866667 | 0.2725       | -0.044933333 | -0.1037      | 0.099566667  |
| SMAD7        | 0.346        | 0.118166667  | -0.044966667 | 0.038433333  | 0.021133333  |
| ZNF618       | 0.0573       | 0.232        | 0.110833333  | 0.0178       | 0.1295       |
| TMEM189      | 0.328966667  | 0.011233333  | -0.006766667 | -0.075       | 0.143233333  |
| LRRC16       | -0.0502      | 0.099066667  | -0.019833333 | -0.143866667 | -0.0973      |
| ASB1         | 0.172066667  | 0.020933333  | 0.1968       | -0.040266667 | -0.0179      |
| TFDP1        | 0.436666667  | 0.145433333  | -0.065566667 | 0.129733333  | 0.030533333  |
| LOC100131980 | 0.239733333  | 0.047333333  | 0.0301       | 0.005333333  | -0.1859      |
| MTA2         | 0.097033333  | 0.239733333  | 0.0214       | 0.131366667  | -0.049       |
| TBC1D10B     | 0.1952       | 0.0552       | 0.114133333  | -0.052133333 | 0.0522       |
| LOC390705    | 0.0686       | 0.073733333  | 0.1291       | 0.0387       | -0.177       |
| LOC100127888 | -0.041833333 | -0.137066667 | 0.105933333  | -0.350266667 | -0.0709      |
| HNRNP3       | 0.131833333  | 0.215466667  | 0.086866667  | -0.1187      | 0.150733333  |
| CXorf39      | 0.032266667  | -0.063766667 | 0.092266667  | -0.101966667 | 0.0463       |
| LGALS3BP     | -0.026766667 | -0.1801      | 0.224466667  | -0.275033333 | -0.0874      |
| RPL23AP13    | -0.188866667 | 0.2441       | -0.4494      | -0.4045      | -0.0528      |
| LOC100133772 | -0.201966667 | 0.556633333  | 0.018133333  | -0.010166667 | -0.062866667 |
| AHNAK        | 0.0033       | 0.135333333  | 0.087        | -0.144366667 | -0.2802      |
| UBE1C        | -0.016666667 | 0.316833333  | 0.001066667  | -0.018733333 | 0.016166667  |
| SDHAP3       | 0.079266667  | 0.160066667  | -0.139066667 | -0.162033333 | -0.130033333 |
| MAPKAPK2     | 0.156533333  | 0.043833333  | 0.03         | 0.106366667  | -0.188166667 |
| TRIP12       | 0.0111       | 0.022133333  | 0.0742       | -0.130666667 | -0.138566667 |
| HADH         | 0.072466667  | 0.025033333  | 0.1078       | -0.041333333 | -0.160766667 |
| LOC439953    | -0.075533333 | 0.0044       | -0.0178      | -0.179966667 | -0.145733333 |
| LOC653489    | -0.1018      | 0.557833333  | -0.185833333 | -0.149933333 | 0.106966667  |
| LOC730041    | -0.032266667 | -0.010866667 | 0.194833333  | 0.029766667  | -0.115166667 |
| LOC653773    | -0.020666667 | 0.0722       | 0.033933333  | -0.057433333 | -0.039266667 |
| ULK3         | 0.010966667  | 0.128        | 0.0391       | -0.0978      | -0.0325      |
| NACAP1       | 0.003933333  | 0.009933333  | -0.0468      | -0.0388      | -0.108666667 |
| MEF2A        | 0.174        | -0.0112      | 0.080866667  | -0.014266667 | -0.126333333 |
| ACAA1        | -0.149366667 | -0.050266667 | 0.1135       | -0.1931      | -0.1288      |
| BIN3         | 0.0582       | 0.2205       | -0.020266667 | -0.157533333 | 0.1137       |
| LOC100131647 | 0.083466667  | -0.013933333 | -0.045133333 | -0.157666667 | -0.173766667 |
| TRAM1L1      | -0.117033333 | 0.137        | 0.037266667  | -0.081766667 | -0.0698      |
| PVRL2        | 0.0699       | 0.078433333  | 0.056        | -0.061466667 | -0.090433333 |

|              |              |              |              |              |              |
|--------------|--------------|--------------|--------------|--------------|--------------|
| TMEM63B      | -0.0748      | -0.0282      | 0.167066667  | -0.0398      | -0.288566667 |
| SLC15A4      | 0.1575       | 0.0271       | 0.174133333  | 0.047133333  | -0.0557      |
| LOC650029    | 0.046333333  | 0.006366667  | 0.118966667  | 0.005966667  | -0.155233333 |
| S100A6       | 0.150666667  | 0.013066667  | 0.243        | 0.011533333  | -0.022       |
| MTHFR        | -0.010066667 | -0.0325      | 0.157133333  | -0.093166667 | -0.061133333 |
| RANBP10      | 0.026533333  | 0.025466667  | -0.029833333 | -0.0755      | -0.1054      |
| ARFGAP1      | 0.099033333  | -0.091866667 | -0.009433333 | -0.038366667 | -0.180966667 |
| KBTBD3       | -0.065266667 | 0.042866667  | 0.109333333  | -0.194233333 | -0.012266667 |
| PDIA3P       | -0.1806      | 0.076733333  | -0.076366667 | -0.2472      | -0.051866667 |
| ERMAP        | -0.2427      | -0.088933333 | 0.096666667  | -0.1799      | -0.147466667 |
| C6orf61      | 0.304366667  | 0.2          | 0.043433333  | 0.0967       | 0.062066667  |
| PMVK         | 0.028133333  | 0.041066667  | 0.155633333  | -0.019633333 | -0.019833333 |
| FAM195B      | -0.005833333 | -0.088433333 | 0.0029       | -0.143       | -0.109633333 |
| RABIF        | 0.028        | 0.0819       | -0.027666667 | -0.0313      | -0.076066667 |
| EARS2        | 0.1202       | 0.114666667  | 0.066066667  | 0.1245       | -0.001866667 |
| P2RX6        | -0.3523      | -0.036166667 | 0.166133333  | -0.383       | -0.103133333 |
| PIGS         | 0.0578       | -0.157       | 0.141833333  | -0.1176      | -0.198633333 |
| RER1         | 0.079466667  | 0.075033333  | -0.028233333 | -0.071033333 | -0.0753      |
| CUGBP1       | 0.221766667  | 0.1861       | 0.079933333  | 0.055533333  | -0.007766667 |
| LOC731605    | 0.310933333  | 0.25         | 0.055433333  | 0.220833333  | 0.033833333  |
| UBR5         | 0.076766667  | 0.058433333  | -0.004733333 | 0.101866667  | -0.200433333 |
| POR          | 0.0973       | 0.084633333  | -0.093466667 | -0.0686      | -0.060366667 |
| DHRS13       | 0.129633333  | 0.034433333  | 0.065966667  | -0.1933      | -0.110066667 |
| LOC283932    | -0.0029      | -0.074       | 0.068966667  | -0.240166667 | -0.058966667 |
| PRKD2        | -0.0299      | -0.017733333 | 0.189533333  | -0.046433333 | -0.085       |
| CNOT1        | -0.0498      | -0.084366667 | 0.171533333  | -0.154033333 | -0.134133333 |
| LOC100132291 | 0.035833333  | 0.0095       | 0.097533333  | -0.085466667 | -0.0041      |
| CRAT         | -0.021366667 | -0.218866667 | 0.088133333  | -0.347466667 | -0.000866667 |
| CHCHD8       | 0.3624       | 0.118633333  | -0.038366667 | 0.125366667  | 0.020966667  |
| HRIHFB2122   | 0.005133333  | 0.113433333  | 0.2292       | -0.085466667 | -0.071466667 |
| PPP4R4       | -0.014133333 | 0.199233333  | 0.0522       | -0.030266667 | -0.101366667 |
| UQCRB        | -0.0564      | 0.071333333  | 0.0659       | -0.079833333 | 0.0231       |
| RECQL        | 0.124866667  | 0.030866667  | 0.034466667  | -0.139466667 | -0.058833333 |
| ELF3         | 0.066166667  | 0.1935       | -0.001833333 | 0.0054       | 0.049433333  |
| SCO1         | 0.139933333  | 0.076233333  | -0.058166667 | -0.046333333 | 0.031233333  |
| NSA2         | 0.081233333  | 0.025966667  | 0.0122       | 0.0334       | -0.093733333 |
| LOC648665    | 0.078866667  | 0.104333333  | 0.045666667  | -0.023533333 | -0.120533333 |
| RPS11        | 0.047166667  | 0.0051       | 0.055666667  | -0.0887      | -0.124733333 |
| CORO1A       | -0.032466667 | 0.202766667  | 0.000833333  | -0.105166667 | 0.0448       |
| TMEM93       | 0.190366667  | 0.103533333  | 0.103866667  | 0.097        | 0.0517       |
| UBN1         | 0.4702       | 0.1726       | 0.0474       | 0.0798       | 0.149533333  |
| SDF2         | -0.171433333 | -0.0294      | 0.111366667  | -0.217233333 | -0.0811      |
| PDCL3        | 0.3454       | 0.2385       | -0.1203      | 0.232866667  | 0.025433333  |
| ZNF320       | -0.1475      | 0.261733333  | 0.0383       | -0.0878      | 0.055733333  |
| LOC653147    | -0.093933333 | 0.0559       | -0.0248      | 0.021        | -0.224733333 |
| PLA2G4A      | 0.090133333  | 0.067333333  | 0.034233333  | -0.0394      | -0.051233333 |
| WDR45        | -0.271866667 | 0.037766667  | 0.105633333  | -0.194533333 | -0.211266667 |

|              |              |              |              |              |              |
|--------------|--------------|--------------|--------------|--------------|--------------|
| LOC392008    | -0.156633333 | 0.250066667  | -0.196266667 | -0.236033333 | 0.069766667  |
| MNAT1        | -0.1501      | 0.289366667  | 0.166666667  | -0.012233333 | 0.086633333  |
| ILVBL        | 0.0597       | -0.0072      | 0.1206       | -0.1175      | -0.050066667 |
| DCI          | -0.2535      | -0.2339      | 0.142533333  | -0.2264      | -0.270266667 |
| OR2A42       | -0.147466667 | 0.201566667  | -0.051233333 | -0.048966667 | 0.0042       |
| CCDC77       | -0.026166667 | 0.273833333  | 0.096933333  | -0.069833333 | 0.009866667  |
| LOC728128    | -0.026166667 | 6.00E-04     | 0.0768       | -0.109766667 | -0.060733333 |
| EBI3         | -0.159733333 | -0.1428      | 0.5488       | -0.092366667 | -0.0141      |
| LOC100131205 | -0.006366667 | 0.0496       | -0.0689      | -0.1573      | -0.0546      |
| LOC644799    | -0.034033333 | -0.0507      | -0.053233333 | -0.173066667 | -0.1073      |
| CCDC99       | 0.1742       | 0.205266667  | 0.0679       | 0.057466667  | 0.013633333  |
| PPP2R3B      | -0.040766667 | 0.3864       | 0.1265       | 0.0838       | -0.0696      |
| STRAP        | -0.028933333 | 0.094166667  | 0.1845       | -0.015766667 | -0.07        |
| BICD1        | 0.043066667  | -0.019       | 0.193133333  | -0.168533333 | 0.015066667  |
| ZMYM2        | -0.2763      | 0.140833333  | 0.148733333  | -0.179166667 | -0.025666667 |
| PDE6D        | -0.113333333 | 0.235866667  | 0.1502       | -0.068333333 | -0.077666667 |
| TUBB2A       | 0.0622       | -0.035833333 | -0.147066667 | -0.141266667 | -0.2206      |
| RUFY1        | -0.004933333 | -0.007066667 | 0.034066667  | -0.0801      | -0.0801      |
| RMND5B       | -0.057233333 | 0.038133333  | 0.089866667  | -0.109733333 | 0.011633333  |
| C1orf93      | 0.2932       | 0.134133333  | -0.068233333 | 0.0377       | 0.0195       |
| TTC30B       | -0.057966667 | -0.1239      | 0.031833333  | -0.277433333 | 0.033833333  |
| ACTR8        | 0.046633333  | 0.009733333  | -0.0154      | 0.007        | -0.116133333 |
| POLA1        | 0.272033333  | 0.093966667  | 0.1084       | 0.0804       | -0.0619      |
| LOC648984    | -0.045833333 | 0.1583       | 0.014233333  | -0.180833333 | -0.031866667 |
| CRTAP        | 0.111566667  | -0.143033333 | 0.026233333  | -0.066266667 | -0.134033333 |
| SAP30BP      | 0.180033333  | 0.048933333  | -0.066266667 | -0.033166667 | -0.071933333 |
| FANCE        | 0.484533333  | 0.062366667  | -0.128       | 0.1082       | -0.049533333 |
| LOC284988    | -0.521566667 | -0.034866667 | 0.137466667  | -0.3638      | -0.1825      |
| DNASE1L1     | -0.071833333 | -0.117566667 | 0.187766667  | -0.108666667 | -0.035833333 |
| ANKRD34A     | -0.091533333 | -0.062066667 | 0.417033333  | -0.058966667 | -0.126666667 |
| QKI          | 0.120666667  | -0.035666667 | 0.019066667  | -0.140766667 | 0.0045       |
| STAT5A       | -0.111533333 | -0.036533333 | 0.1251       | -0.1309      | -0.135666667 |
| LOC644250    | -0.2421      | 0.668666667  | -0.3294      | -0.323633333 | 0.126766667  |
| PANK3        | 0.1379       | 0.018466667  | 0.039066667  | 0.003333333  | -0.040066667 |
| LOC729102    | 0.3228       | 0.0567       | 0.017833333  | 0.057966667  | 0.0413       |
| ERH          | 0.127766667  | 0.2216       | -0.0567      | 0.0662       | -0.017433333 |
| CCDC124      | 0.224133333  | 0.1124       | 0.020333333  | 0.0328       | 0.126        |
| LOC100129141 | 0.165933333  | -0.0144      | 0.108166667  | 0.031433333  | -0.112233333 |
| STIM2        | 0.2216       | 0.374766667  | -0.007833333 | 0.126066667  | -0.061533333 |
| MGC40489     | 0.205933333  | 0.423566667  | -0.103966667 | 0.159866667  | 0.035433333  |
| TMEM208      | 0.043133333  | 0.010533333  | -0.275466667 | 0.045366667  | -0.203133333 |
| NBR1         | 0.0475       | -0.029366667 | 0.148033333  | -0.0126      | -0.060766667 |
| KIAA1598     | -0.120733333 | -0.1404      | 0.0403       | -0.2157      | -0.2309      |
| KIF14        | 0.104266667  | 0.2234       | 0.270866667  | 0.173666667  | 0.052733333  |
| LSAMP        | -0.0834      | 0.001366667  | 0.055066667  | -0.102066667 | -0.107733333 |
| ZNF584       | 0.131933333  | 0.260866667  | -0.067166667 | 0.1027       | -0.1536      |
| STAT3        | 0.121866667  | -0.0487      | 0.064066667  | -0.003866667 | -0.154866667 |

|              |              |              |              |              |              |
|--------------|--------------|--------------|--------------|--------------|--------------|
| FAM53A       | 0.104733333  | -0.0101      | -0.127933333 | -0.245933333 | -0.059266667 |
| RAB18        | -0.008366667 | -0.0217      | -0.0157      | -0.163766667 | 0            |
| JAKMIP2      | -0.402533333 | -0.1259      | 0.098866667  | -0.368166667 | -0.132766667 |
| KDM4D        | 0.0875       | 0.089433333  | 0.064933333  | 0.017666667  | -0.0503      |
| LOC338870    | -0.159366667 | -0.053533333 | -0.0371      | -0.2006      | -0.139433333 |
| PNKD         | -0.181966667 | 0.0654       | 0.215733333  | -0.228533333 | -0.010033333 |
| LOC100129502 | -0.1451      | 0.8148       | -0.073833333 | -0.1184      | 0.317766667  |
| LOC390735    | -0.510066667 | 0.246333333  | -0.2498      | -0.344433333 | -0.1393      |
| LRRC1        | -0.146133333 | 0.0088       | 0.016766667  | -0.3257      | -0.0252      |
| PRRG4        | -0.0971      | 0.797866667  | 0.094733333  | 0.059866667  | 0.3912       |
| CCDC41       | 0.116533333  | 0.153366667  | 0.2762       | 0.050466667  | 0.0537       |
| CNOT6L       | 0.188933333  | 0.173433333  | 0.0468       | 0.1178       | -0.012066667 |
| FLJ10088     | -0.256933333 | 0.561066667  | -0.243133333 | -0.230566667 | 0.1268       |
| TPX2         | 0.2985       | 0.094166667  | 0.1255       | 0.278966667  | -0.083133333 |
| ACBD5        | 0.055166667  | 0.064833333  | 0.143033333  | 0.065966667  | 0.050333333  |
| ZNF7         | 0.099933333  | -0.0291      | 0.033233333  | -0.106766667 | -0.104466667 |
| ZNF768       | 0.040533333  | 0.006266667  | -0.042033333 | -0.1351      | -0.1912      |
| LOC100131160 | -0.417433333 | 0.319466667  | -0.326066667 | -0.393566667 | 0.074666667  |
| ZBTB22       | -0.293766667 | 0.017133333  | 0.2764       | -0.263033333 | -0.072366667 |
| OAS3         | 0.193966667  | -0.083233333 | 0.1584       | -0.000833333 | -0.103133333 |
| FGF2         | 0.3584       | -0.228333333 | 0.093866667  | 0.175466667  | -0.099233333 |
| ZNF738       | -0.184633333 | 0.687866667  | -0.1203      | -0.0809      | 0.116533333  |
| PLA2G2D      | -0.191033333 | 0.766233333  | -0.232533333 | -0.125933333 | 0.144033333  |
| HSZFP36      | 0.141966667  | 0.004666667  | 0.0351       | 0.204166667  | -0.262966667 |
| SNORD68      | 0.3097       | 0.211433333  | -0.106333333 | 0.1307       | 0.0355       |
| COG2         | 0.000933333  | 0.154966667  | 0.096466667  | -0.137033333 | -0.0019      |
| DDX54        | 0.324166667  | 0.282166667  | 0.016766667  | 0.111533333  | 0.049533333  |
| ETAA1        | -0.216466667 | -0.012366667 | 0.062966667  | -0.199533333 | -0.111933333 |
| SNORA18      | 0.216133333  | 0.161433333  | -0.0735      | -0.006966667 | 0.066666667  |
| RHOT2        | 0.0589       | 0.117433333  | 0.0689       | -0.014366667 | -0.1552      |
| LOC168474    | 0.171466667  | 0.189866667  | 0.028233333  | 0.0746       | -0.013633333 |
| CENPT        | 0.236466667  | 0.0603       | -0.037533333 | 0.109633333  | -0.1296      |
| SAMD9        | -0.3104      | 0.112766667  | 0.252766667  | -0.478066667 | -0.054533333 |
| SH2D1A       | 0.040733333  | 0.085466667  | 0.036566667  | -0.061866667 | -0.166933333 |
| BTA1F1       | 0.040933333  | -0.0057      | 0.061933333  | -0.103333333 | -0.066933333 |
| FKBP9        | -0.0385      | 0.001633333  | 0.0463       | -0.160266667 | -0.073033333 |
| LOC100128191 | 0.2332       | 0.166533333  | 0.085466667  | 0.0521       | 0.121366667  |
| MYO18A       | -0.343533333 | 0.081433333  | 0.131        | -0.3592      | 0.001366667  |
| PRCP         | -0.304033333 | 0.0497       | 0.067366667  | -0.2268      | -0.163733333 |
| RNF187       | -0.001333333 | -0.104766667 | 0.0538       | -0.233166667 | -0.1006      |
| POTEF        | 0.257        | 0.116366667  | 0.0798       | 0.193533333  | -0.111933333 |
| MATR3        | 0.088233333  | -0.050966667 | -0.003633333 | -0.006433333 | -0.106033333 |
| PI15         | -0.035866667 | 0.048533333  | -0.004366667 | -0.1197      | -0.035566667 |
| LOC642443    | -0.0649      | 0.248266667  | -0.0788      | -0.198133333 | 0.002266667  |
| SERPINB6     | -0.352466667 | -0.1368      | 0.4444       | -0.380266667 | -0.152633333 |
| ARL5B        | 0.2892       | 0.0928       | 0.055333333  | 0.1111       | -0.011133333 |
| LOC731954    | 0.061033333  | 0.098533333  | 0.173533333  | 0.0001       | -0.004066667 |



|              |              |              |              |              |              |
|--------------|--------------|--------------|--------------|--------------|--------------|
| LOC728060    | -0.149066667 | 0.025866667  | -0.180066667 | -0.276666667 | -0.147266667 |
| LOC100132199 | -0.3525      | -0.008466667 | -0.112066667 | -0.395933333 | -0.145233333 |
| LOC730060    | -0.262066667 | 0.6561       | -0.1663      | -0.211933333 | 0.1758       |
| CRTC1        | -0.023466667 | 0.0205       | 0.2571       | 0.0235       | -0.081533333 |
| APOOL        | -0.032366667 | 0.0609       | 0.0865       | -0.102166667 | 0.033766667  |
| TRAPPC1      | -0.153033333 | -0.0275      | 0.155133333  | -0.249533333 | -0.1457      |
| ZNF828       | 0.297        | 0.159366667  | 0.0308       | 0.144233333  | -0.032133333 |
| LBH          | -0.176133333 | 0.135566667  | 0.070733333  | -0.139133333 | -0.216333333 |
| AJAP1        | 0.6261       | 0.143        | 0.166766667  | 0.269466667  | 0.100266667  |
| LOC100129681 | -0.026433333 | 0.078266667  | 0.358166667  | 0.016633333  | 0.042633333  |
| RNPEP        | -0.181666667 | 0.055333333  | 0.0937       | -0.230066667 | -0.1209      |
| UST          | -0.054633333 | 0.034533333  | 0.0645       | -0.124633333 | -0.1426      |
| CMPK1        | 0.0509       | -0.158833333 | 0.028233333  | -0.1533      | -0.062333333 |
| LOC645979    | -0.101966667 | 0.163833333  | -0.032033333 | -0.121333333 | -0.0773      |
| EPHA4        | 0.196066667  | 0.103        | 0.035766667  | 0.004633333  | -0.006566667 |
| SART3        | 0.2295       | 0.056066667  | 0.187666667  | 0.110733333  | 0.061033333  |
| DAPK1        | 0.090466667  | 0.1229       | 0.0551       | -0.012433333 | 0.026466667  |
| STK11IP      | 0.158433333  | 0.063466667  | 0.070933333  | 0.019733333  | -0.071       |
| LOC100127999 | -0.100066667 | 0.157333333  | -0.055766667 | -0.126033333 | -0.077666667 |
| SS18L1       | 0.0781       | 0.0669       | 0.241066667  | 0.092866667  | -0.100033333 |
| HLCS         | -0.050533333 | -0.121533333 | 0.056233333  | -0.3464      | -0.1481      |
| SPATA7       | -0.316166667 | -0.2223      | -0.009733333 | -0.406833333 | -0.3382      |
| ARHGFE6      | -0.401033333 | -0.055633333 | 0.5243       | -0.296966667 | -0.1121      |
| DSCC1        | 0.3752       | 0.158966667  | 0.018466667  | 0.040933333  | 0.050066667  |
| RECK         | -0.314866667 | -0.096133333 | 0.152133333  | -0.480533333 | -0.175166667 |
| NUBP1        | 0.362366667  | 0.044933333  | -0.032433333 | 0.241166667  | -0.0775      |
| NFS1         | -0.016666667 | 0.053833333  | 0.080533333  | -0.148033333 | 0.076633333  |
| C17orf90     | -0.185466667 | -0.1864      | -0.004133333 | -0.341466667 | -0.1894      |
| DSC3         | 0.106333333  | 0.068033333  | -0.182666667 | -0.120533333 | -0.195033333 |
| RPS4X        | -0.035166667 | -0.032933333 | 0.0653       | -0.2127      | -0.0746      |
| ZFP42        | 0.242833333  | 0.1648       | -0.009833333 | -0.077933333 | 0.005866667  |
| SNORD57      | 0.3948       | 0.160066667  | -0.003833333 | 0.247733333  | 0.0287       |
| MAGEE1       | 0.099766667  | -0.0868      | 0.079333333  | -0.072333333 | -0.0417      |
| SLC25A44     | 0.194233333  | 0.048033333  | -0.045766667 | 0.01         | -0.084766667 |
| PHKA2        | -0.098866667 | 0.003233333  | 0.137066667  | -0.0899      | -0.135133333 |
| LOC442162    | -0.3301      | 0.212933333  | -0.199966667 | -0.2983      | 0.044366667  |
| SCPEP1       | -0.073433333 | -0.050833333 | 0.1435       | -0.161333333 | -0.1006      |
| GMPR         | 0.091366667  | 0.0017       | 0.107066667  | -0.027833333 | -0.0456      |
| ZNF511       | 0.1578       | 0.279333333  | 0.0318       | 0.009        | 0.045466667  |
| SERTAD1      | 0.260066667  | 0.278966667  | -0.0462      | -0.012066667 | 0.078866667  |
| LOC81691     | 0.132933333  | 0.101        | 0.141466667  | 0.036333333  | -0.008633333 |
| SNORD15B     | 0.2858       | 0.102333333  | -0.0446      | 0.071566667  | -0.055266667 |
| TUBD1        | 0.006066667  | 0.0279       | 0.181866667  | -0.022       | -0.069066667 |
| HSD17B11     | 0.133866667  | 0.198533333  | 0.2053       | 0.199466667  | 0.0415       |
| LOC100132425 | 0.056433333  | 0.463066667  | -0.101866667 | -0.031366667 | 0.1653       |
| RNF135       | -0.194       | -0.022266667 | 0.1137       | -0.165566667 | -0.1399      |
| SAT2         | -0.054333333 | -0.084433333 | 0.029        | -0.172233333 | -0.121266667 |

|              |              |              |              |              |              |
|--------------|--------------|--------------|--------------|--------------|--------------|
| ACOT1        | 0.016933333  | -0.210966667 | -0.0023      | -0.170733333 | -0.135833333 |
| TMEM123      | 0.228833333  | -0.027333333 | 0.082733333  | -0.000933333 | -0.048166667 |
| LOC729406    | 0.2188       | 0.133233333  | -0.023933333 | -0.007066667 | 0.192333333  |
| LOC728779    | 0.232533333  | 0.174133333  | -0.0138      | 0.055533333  | -0.174       |
| UHRF1        | 0.6417       | 0.110233333  | -0.051833333 | 0.297166667  | -0.045133333 |
| RBM43        | -0.211166667 | -0.278166667 | 0.0174       | -0.276066667 | -0.316       |
| CDK10        | 0.1458       | 0.137133333  | 0.133533333  | -0.186033333 | 0.147033333  |
| RARRES3      | -0.052933333 | -0.046566667 | 0.183033333  | -0.1507      | -0.070333333 |
| SCAPER       | -0.033233333 | 0.0116       | 0.1387       | -0.088066667 | -0.059733333 |
| RNF123       | -0.162333333 | -0.0303      | 0.303733333  | -0.0757      | -0.159566667 |
| CD58         | -0.067133333 | 0.071733333  | 0.357866667  | -0.081       | 0.0626       |
| FBXW8        | -0.147833333 | -0.061466667 | 0.112666667  | -0.249666667 | -0.0303      |
| RAI1         | 0.209833333  | 0.122066667  | 0.209133333  | 0.091033333  | 0.001466667  |
| NAPA         | 0.130066667  | -0.047466667 | 0.054133333  | -0.0091      | -0.061133333 |
| NLRP8        | -0.2687      | 0.837833333  | -0.2634      | -0.271333333 | 0.124966667  |
| MXD4         | -0.542733333 | -0.111933333 | 0.3997       | -0.406733333 | -0.023866667 |
| LOC100129118 | 0.163233333  | 0.079833333  | 0.1963       | 0.016433333  | 0.118633333  |
| SERBP1       | 0.335966667  | 0.010866667  | 0.2562       | 0.134833333  | 0.257066667  |
| ZNF285A      | 0.078433333  | 0.216066667  | 0.0133       | -0.062133333 | 0.069533333  |
| AGGF1        | -0.110733333 | -0.052766667 | 0.0168       | -0.2072      | -0.1649      |
| DHX33        | 0.523466667  | 0.0833       | -0.059833333 | 0.1743       | -0.1592      |
| THRAP3       | 0.404266667  | 0.169933333  | 0.021433333  | 0.0821       | -0.030766667 |
| FTO          | -0.122033333 | 0.132933333  | 0.119833333  | -0.2339      | 0.032633333  |
| LOC400061    | -0.120433333 | 0.109833333  | -0.0491      | -0.108866667 | -0.100166667 |
| ZNF416       | 0.1216       | 0.127866667  | -0.0338      | 0.024366667  | -0.158966667 |
| TIMM17A      | 0.178366667  | 0.2057       | -0.059133333 | -0.069066667 | 0.026833333  |
| RFC5         | 0.265633333  | 0.065166667  | 0.034766667  | 0.048833333  | -0.1365      |
| TRAM2        | 0.2853       | 0.165566667  | -0.0375      | 0.148433333  | -0.013333333 |
| LOC392501    | -0.401166667 | 0.276166667  | -0.258566667 | -0.3938      | 0.0413       |
| RAB24        | -0.1456      | -0.119133333 | 0.208566667  | -0.1716      | -0.173266667 |
| ANGPTL2      | 0.211633333  | 0.096266667  | 0.046        | -0.044733333 | 0.0912       |
| POGK         | 0.347266667  | 0.034066667  | 0.036866667  | 0.098633333  | -0.100466667 |
| ADD3         | -0.364233333 | -0.115666667 | 0.130933333  | -0.333533333 | -0.192533333 |
| DDR1         | -0.049       | -0.1022      | 0.285866667  | -0.045433333 | -0.217566667 |
| PHACTR4      | -0.0224      | 0.105566667  | 0.0343       | -0.057833333 | -0.1366      |
| TRAFD1       | 0.034833333  | -0.027866667 | -0.046866667 | -0.016966667 | -0.270966667 |
| PRKAR1A      | -0.2509      | -0.331233333 | 0.282033333  | -0.407133333 | -0.063566667 |
| KLHL22       | 0.044033333  | -0.052       | 0.028333333  | -0.2763      | -0.066333333 |
| TMEM198      | 0.063933333  | 0.012266667  | 0.0824       | -0.091033333 | -0.061366667 |
| LMBRD1       | -0.2698      | -0.004733333 | 0.2517       | -0.1871      | -0.190766667 |
| THAP11       | 0.151533333  | 0.109533333  | 0.1418       | 0.0216       | 0.059666667  |
| C10orf2      | 0.276766667  | 0.1036       | 0.024866667  | 0.181466667  | -0.047066667 |
| C20orf4      | 0.238133333  | 0.0421       | 0.0293       | 0.108366667  | -0.155633333 |
| FUS          | 0.2837       | 0.085166667  | -0.0016      | 0.109566667  | -0.087033333 |
| RTTN         | 0.070866667  | 0.255033333  | 0.071666667  | -0.041933333 | 0.0695       |
| TUBGCP6      | -0.044933333 | 0.033633333  | 0.0121       | -0.161166667 | -0.131366667 |
| WDR19        | -0.238433333 | 0.061266667  | -0.034366667 | -0.205133333 | -0.143433333 |

|              |              |              |              |              |              |
|--------------|--------------|--------------|--------------|--------------|--------------|
| F2R          | 0.192533333  | 0.0378       | -0.081133333 | 0.109366667  | -0.1424      |
| PTK2         | -0.055566667 | -0.037433333 | 0.310833333  | -0.1624      | 6.67E-05     |
| C6orf106     | 0.123233333  | -0.030466667 | 0.0372       | -0.030233333 | -0.1666      |
| ANLN         | 0.314366667  | 0.134666667  | 0.051133333  | 0.146333333  | 0.072666667  |
| MYB          | 0.185366667  | 0.083066667  | -0.0119      | -0.0643      | -0.1052      |
| ATP5D        | 0.096533333  | 0.001833333  | 0.150033333  | -0.017066667 | 0.0213       |
| ANKRD17      | -0.094833333 | -0.143233333 | 0.2351       | -0.062       | 0.033966667  |
| MED15        | 0.061833333  | 0.0414       | 0.064033333  | -0.017133333 | -0.252133333 |
| LOC653604    | 0.2161       | 0.145766667  | 0.033066667  | -0.013233333 | 0.112666667  |
| UQCRC2       | -0.182133333 | 0.039933333  | 0.021133333  | -0.073166667 | -0.162666667 |
| LOC643308    | -0.573666667 | 0.1927       | -0.458733333 | -0.4036      | -0.267133333 |
| NDUFC1       | -0.060033333 | -0.037833333 | 0.179633333  | -0.181733333 | -0.179       |
| LOC653387    | -0.055633333 | -0.2394      | 0.122233333  | -0.2963      | -0.1826      |
| SLC5A8       | -0.246833333 | 0.755966667  | -0.2809      | -0.127033333 | 0.183066667  |
| RPL9         | 0.298966667  | 0.022633333  | -0.0166      | -0.030333333 | 0.002866667  |
| RPS26P10     | -0.133233333 | 0.234733333  | -0.0995      | -0.1242      | 0.1352       |
| CNN2         | 0.261133333  | 0.146833333  | 0.0693       | 0.1669       | -0.0174      |
| C9orf102     | 0.070766667  | 0.1039       | 0.035433333  | -0.077166667 | -0.096866667 |
| LOC100129975 | 0.210566667  | 0.105666667  | 0.0253       | -0.025833333 | 0.070566667  |
| FBXW2        | 0.226333333  | 0.043566667  | -0.074833333 | -0.034433333 | -0.0515      |
| TASP1        | 0.1422       | 0.055633333  | 0.0388       | -0.124       | -0.019266667 |
| HMG20A       | -0.0515      | 0.0002       | 0.1589       | -0.1264      | -0.097366667 |
| ACO1         | -0.141233333 | 0.019733333  | 0.126533333  | -0.059533333 | -0.1109      |
| RAVER1       | 0.416533333  | 0.145766667  | 0.022133333  | 0.2185       | -0.022033333 |
| SAPS2        | -0.186766667 | -0.040833333 | 0.3007       | -0.161633333 | -0.170366667 |
| LOC390671    | 0.046766667  | 0.1219       | -0.012133333 | -0.048466667 | -0.098466667 |
| ABHD6        | 0.048366667  | 0.0096       | 0.168666667  | -0.151133333 | -0.100066667 |
| LOC650034    | 0.2222       | -0.0156      | 0.1946       | 0.006966667  | -0.012233333 |
| LOC650132    | 0.179        | 0.088266667  | 0.028833333  | -0.038033333 | -0.053133333 |
| NPAL3        | -0.721666667 | -0.276266667 | 0.6003       | -0.547166667 | -0.339633333 |
| EIF2AK1      | 0.021566667  | 0.033633333  | -0.0269      | -0.141966667 | -0.100866667 |
| E2F5         | 0.145533333  | 0.060433333  | 0.075533333  | 0.033966667  | -0.050833333 |
| AHDC1        | 0.282866667  | 0.053633333  | 0.1394       | 0.211133333  | -0.1282      |
| PCSK7        | 0.0832       | 0.049866667  | -0.012366667 | -0.112333333 | -0.113833333 |
| SH3D19       | -0.188066667 | -0.2557      | 0.081966667  | -0.345466667 | -0.075966667 |
| YME1L1       | 0.110033333  | 0.187066667  | 0.100933333  | -0.022866667 | 0.015566667  |
| UNG          | 0.352733333  | 0.037533333  | -0.037366667 | 0.177666667  | -0.009066667 |
| LOC727970    | -0.289233333 | 0.2829       | -0.3106      | -0.448633333 | 0.078        |
| SNHG11       | 0.2264       | 0.0034       | -0.0171      | -0.019666667 | -0.121533333 |
| LOC728139    | 0.158        | -0.0889      | 0.207966667  | -0.051966667 | -0.057933333 |
| ZCCHC17      | 0.062633333  | -0.0845      | 0.097566667  | -0.043133333 | -0.1872      |
| STAG3L1      | -0.050433333 | 0.0196       | 0.0152       | -0.143133333 | -0.090133333 |
| ACBD3        | -0.130333333 | -0.0071      | 0.038566667  | -0.0692      | -0.011833333 |
| NOMO1        | 0.241733333  | 0.074266667  | 0.005266667  | 0.1018       | -0.051833333 |
| HSD17B4      | -0.368533333 | 0.0149       | 0.111733333  | -0.359166667 | -0.245933333 |
| HHEX         | 0.301066667  | 0.339033333  | 0.364166667  | 0.2378       | 0.0552       |
| UCK1         | 0.308833333  | 0.092666667  | -0.004033333 | 0.036933333  | -0.076533333 |

|              |              |              |              |              |              |
|--------------|--------------|--------------|--------------|--------------|--------------|
| MRPL28       | 0.010566667  | 0.085433333  | 0.021733333  | -0.235933333 | 0.070466667  |
| FAHD1        | -0.046566667 | 0.030233333  | -0.001366667 | -0.1086      | -0.036766667 |
| MGC12965     | -0.042066667 | -0.001233333 | -0.146333333 | -0.268533333 | -0.016866667 |
| HOXA4        | 0.019833333  | 0.103833333  | 0.480533333  | -0.175333333 | 0.0808       |
| LOC441896    | -0.715133333 | 0.283466667  | -0.706266667 | -0.6834      | 0.006833333  |
| COP55        | 0.033933333  | 0.086366667  | 0.089366667  | -0.094966667 | -0.039533333 |
| ZNF286C      | 0.1106       | 0.209166667  | -0.056066667 | 0.209466667  | -0.1726      |
| LOC391655    | -0.279633333 | 0.266933333  | -0.299866667 | -0.334066667 | 0.102033333  |
| ORMDL2       | -0.0979      | 0.3027       | 0.029966667  | -0.109666667 | -0.0185      |
| ETV6         | -0.052166667 | 0.1883       | 0.263966667  | -0.0699      | 0.103466667  |
| TAF1         | 0.201633333  | 0.013033333  | 0.089966667  | -0.038833333 | -0.0339      |
| ZFP112       | -0.0122      | 0.0779       | 0.0533       | -0.102066667 | -0.001266667 |
| ASCC1        | -0.284433333 | 0.008833333  | 0.0645       | -0.477933333 | -0.0825      |
| PRR22        | 0.224933333  | 0.088333333  | -0.075066667 | 0.130966667  | -0.087966667 |
| RNF214       | 0.0048       | -0.0974      | 0.162666667  | -0.1343      | -0.110633333 |
| FAM40B       | -0.234766667 | 0.752566667  | -0.216466667 | -0.196866667 | 0.126966667  |
| RUSC1        | 0.192        | 0.0358       | 0.122        | 0.0073       | -0.077933333 |
| SNRNP48      | 0.2177       | 0.187033333  | -0.046666667 | 0.005733333  | 0.0442       |
| CANX         | 0.0099       | -0.048266667 | 0.2211       | -0.096133333 | -0.0703      |
| LOC654069    | -0.251966667 | -0.051433333 | 0.248066667  | -0.1845      | -0.0498      |
| LOC653702    | -0.413066667 | 0.222933333  | -0.313566667 | -0.368233333 | -0.108866667 |
| ZNF3         | 0.146833333  | 0.045033333  | -0.089666667 | -0.039366667 | -0.120933333 |
| C1orf25      | -0.2237      | -0.0419      | -0.0202      | -0.346       | -0.019733333 |
| LOC388339    | -0.177633333 | -0.0138      | 0.1604       | -0.116166667 | -0.162966667 |
| SGOL1        | 0.1186       | 0.3303       | 0.031        | 0.099866667  | -0.0022      |
| ATP5S        | -0.165933333 | -0.029066667 | 0.1017       | -0.117133333 | -0.172566667 |
| TNPO3        | 0.121633333  | -0.007166667 | -0.046066667 | -0.052533333 | -0.120366667 |
| ADD1         | -0.003166667 | -0.004166667 | 0.151633333  | -0.148766667 | -0.040466667 |
| DCAF6        | -0.2208      | -0.0323      | 0.272433333  | -0.274466667 | -0.227066667 |
| ZNF787       | 0.3289       | 0.2652       | 0.008566667  | 0.133533333  | 0.124633333  |
| C19orf40     | 0.209733333  | 0.092133333  | 0.111133333  | 0.057        | -0.049633333 |
| STT3A        | 0.115        | 0.154666667  | 0.075433333  | 0.044133333  | -0.002366667 |
| C15orf63     | -0.2139      | 0.626733333  | 0.028633333  | -0.1593      | 0.0832       |
| UBL5         | 0.302466667  | 0.060433333  | 0.129233333  | 0.076966667  | -0.0374      |
| LOC400464    | 0.006633333  | 0.097766667  | 0.2044       | -0.071633333 | -0.048533333 |
| GMCL1        | 0.105566667  | 0.062533333  | 0.078266667  | -0.0303      | -0.1135      |
| ZNF518A      | -0.018866667 | 0.034        | -0.0939      | -0.104666667 | -0.031466667 |
| HSD17B1      | 0.0356       | 0.032766667  | 0.1207       | -0.080166667 | -0.0666      |
| FOXO1        | 0.014266667  | 0.067966667  | -0.126533333 | -0.183       | -0.072733333 |
| CHMP4C       | -0.2742      | -0.026366667 | -0.0933      | -0.279866667 | -0.072866667 |
| DYNC2L1      | -0.325633333 | 0.055233333  | 0.120466667  | -0.3359      | -0.177633333 |
| LOC392437    | -0.543733333 | -0.121133333 | 0.2414       | -0.6254      | -0.0862      |
| NDST2        | -0.152333333 | -0.059466667 | -0.066033333 | -0.3663      | -0.1921      |
| WEE1         | 0.133866667  | 0.161866667  | -0.0301      | 0.1608       | -0.292433333 |
| CENTA1       | -0.1876      | -0.036       | 0.117733333  | -0.421566667 | -0.166333333 |
| LOC100132728 | 0.097566667  | 0.504866667  | -0.197033333 | -0.043933333 | 0.286166667  |
| NFYA         | 0.322433333  | 0.0798       | 0.023533333  | 0.113366667  | -0.0974      |

|              |              |              |              |              |              |
|--------------|--------------|--------------|--------------|--------------|--------------|
| C12orf5      | 0.1917       | 0.1294       | 0.006966667  | 0.009633333  | 0.051766667  |
| TAF1L        | 0.176266667  | 0.0881       | 0.0033       | -0.102066667 | -0.0515      |
| EPN2         | 0.014866667  | 0.0526       | 0.181433333  | -0.066666667 | -0.087033333 |
| ADRBK1       | 0.128533333  | 0.071333333  | 0.188066667  | -0.113133333 | -0.009       |
| C5orf33      | 0.1076       | 0.049033333  | -0.101333333 | -0.1542      | 0.006133333  |
| LOC651149    | -0.0242      | -0.033433333 | 0.0772       | -0.1795      | -0.088566667 |
| DCTN2        | -0.102766667 | 0.004133333  | 0.056266667  | -0.191933333 | -0.110633333 |
| MCEE         | -0.0068      | 0.078066667  | 0.176633333  | -0.093233333 | -0.011233333 |
| SF3B14       | -0.104966667 | 0.122466667  | 0.049066667  | -0.090433333 | -0.037233333 |
| LOC440396    | 0.139366667  | 0.1992       | -0.099566667 | -0.096933333 | 0.0341       |
| GPN1         | 0.024866667  | 0.0623       | 0.0246       | -0.042333333 | -0.1485      |
| GPR1         | 0.009533333  | 1.015466667  | -0.3179      | 0.1296       | 0.2097       |
| POLE         | 0.447466667  | 0.004633333  | 0.124066667  | 0.114633333  | -0.047433333 |
| EHD4         | 0.6152       | 0.059633333  | -0.277966667 | 0.1637       | -0.029233333 |
| FAM73B       | 0.158833333  | 0.101666667  | -0.094466667 | -0.0258      | -0.105566667 |
| BPHL         | -0.017466667 | -0.2427      | 0.264666667  | -0.127666667 | -0.308066667 |
| SNX14        | -0.1779      | 0.1175       | 0.133666667  | -0.3085      | -0.0463      |
| CTBP1        | 0.492866667  | 0.115633333  | -0.084333333 | 0.181033333  | -0.024666667 |
| NSL1         | 0.076466667  | -0.007666667 | 0.150166667  | -0.0807      | -0.023733333 |
| PLOD3        | 0.036033333  | 0.005333333  | 0.144433333  | -0.160666667 | -0.1117      |
| STAU2        | -0.1153      | 0.255466667  | 0.035533333  | -0.176533333 | -0.093466667 |
| CSNK1G1      | 0.015233333  | 0.234733333  | 0.0684       | -0.057866667 | -0.006566667 |
| COL12A1      | 0.477833333  | -0.059766667 | -0.036566667 | 0.111066667  | -0.098833333 |
| LOC654042    | -0.0553      | -0.001233333 | 0.026266667  | -0.189166667 | -0.109266667 |
| RHOJ         | 0.2419       | 0.0711       | -0.176133333 | 0.075733333  | -0.031333333 |
| CBFA2T2      | 0.033733333  | 0.026133333  | -0.128033333 | -0.180466667 | -0.160466667 |
| C19orf54     | -0.027666667 | 0.1221       | -0.004166667 | -0.2292      | 0.0149       |
| ZCCHC24      | -0.342933333 | -0.168133333 | 0.670333333  | -0.445733333 | 0.022033333  |
| FAM111B      | 0.384733333  | 0.129233333  | -0.039966667 | 0.1147       | 0.024233333  |
| ALB          | 0.147033333  | 0.033966667  | 0.214266667  | 0.054        | -0.058266667 |
| LOC100131675 | -0.579366667 | 0.165066667  | -0.489033333 | -0.642866667 | -0.0092      |
| HIPK2        | 0.317733333  | 0.2231       | 0.288166667  | 0.045833333  | 0.113333333  |
| RYBP         | 0.0497       | 0.0417       | 0.321633333  | 0.026433333  | 0.002333333  |
| RIN1         | 0.3159       | -0.021366667 | 0.097366667  | 0.103733333  | -0.0447      |
| BBS7         | -0.0223      | 0.002        | 0.194366667  | -0.170333333 | 0.008766667  |
| ATP6AP2      | -0.184933333 | -0.160966667 | 0.084733333  | -0.1929      | -0.153066667 |
| PDXDC1       | 0.093233333  | 0.025766667  | 0.022266667  | -0.095433333 | -0.0671      |
| POLDIP2      | 0.2193       | 0.183133333  | 0.058        | 0.065        | 0.0393       |
| SPATA6       | -0.027033333 | 0.007633333  | 0.2518       | -0.141666667 | -0.0715      |
| LOC100133177 | -0.009033333 | 0.5162       | -0.005566667 | -0.137233333 | 0.112433333  |
| LOC728408    | 0.3005       | 0.281133333  | 0.118366667  | 0.2138       | 0.0138       |
| ANKRD27      | 0.233866667  | 0.250366667  | 0.020133333  | 0.0187       | 0.133566667  |
| HP1BP3       | 0.067133333  | -0.035933333 | 0.1336       | -0.140266667 | -0.1017      |
| ARHGEF7      | 0.0033       | 0.0818       | -0.057366667 | -0.085733333 | -0.169933333 |
| LOC728782    | -0.013533333 | 0.080866667  | 0.0293       | -0.055266667 | -0.034       |
| DGKQ         | -0.2065      | -0.054166667 | 0.1153       | -0.221966667 | -0.292633333 |
| LRRC37B2     | -0.234766667 | 0.908266667  | -0.291466667 | -0.108933333 | -0.004333333 |

|              |              |              |              |              |              |
|--------------|--------------|--------------|--------------|--------------|--------------|
| TRIM13       | -0.117       | 0.531233333  | 0.0279       | -0.153433333 | 0.2055       |
| DDEF2        | 0.223333333  | 0.086933333  | 0.125466667  | 0.059633333  | -0.057       |
| DYX1C1       | -0.192166667 | 0.022266667  | -0.0134      | -0.220266667 | -0.2626      |
| PTP4A2       | -0.137533333 | 0.621533333  | -0.143333333 | -0.196066667 | 0.1558       |
| TROVE2       | 0.129266667  | -0.331366667 | 0.109166667  | -0.157366667 | -0.028166667 |
| NARG2        | 0.0929       | 0.189933333  | -0.005666667 | -0.005433333 | -0.043533333 |
| PHLDB1       | -0.118066667 | 0.238233333  | 0.4364       | -0.222633333 | 0.199566667  |
| KCTD18       | -0.0132      | -0.1086      | 0.0737       | -0.193133333 | -0.107566667 |
| DALRD3       | -0.116333333 | 0.017333333  | 0.015533333  | -0.298066667 | -0.072766667 |
| C10orf140    | -0.005733333 | 0.1304       | 0.2246       | -0.012066667 | -0.104933333 |
| UBE2E3       | 0.4487       | 0.140766667  | 0.1475       | 0.215233333  | 0.016766667  |
| MGC3196      | -0.215133333 | -0.0537      | 0.1996       | -0.3001      | -0.1263      |
| LOC400986    | 0.015333333  | 0.0307       | 0.258        | -0.060833333 | -0.082033333 |
| MFSD11       | -0.4335      | 0.2272       | 0.184366667  | -0.3198      | -0.1258      |
| PLXNB3       | -0.1842      | -0.090666667 | 0.103466667  | -0.2038      | -0.266233333 |
| DOCK5        | 0.057        | 0.083233333  | 0.1885       | -0.090766667 | -0.0689      |
| ANP32C       | 0.198333333  | 0.254866667  | 0.044033333  | 0.013366667  | 0.208133333  |
| EPB41L5      | 0.065233333  | 0.0356       | 0.0622       | -0.171366667 | 0.0363       |
| LOC644310    | -0.0885      | 0.208466667  | -0.088966667 | -0.159266667 | -0.060733333 |
| CDC42BPA     | -0.053366667 | -0.026933333 | 0.068566667  | -0.311966667 | -0.201333333 |
| LOC100128062 | -0.1995      | 0.747966667  | -0.1364      | -0.195766667 | 0.1067       |
| TFAP2C       | 0.209066667  | 0.2233       | 0.178033333  | 0.178533333  | 0.044233333  |
| HNRPDL       | 0.104466667  | 0.361066667  | 0.002466667  | 0.024933333  | 0.0971       |
| LOC646936    | 0.081233333  | 0.298033333  | 0.102366667  | 0.0226       | -0.034966667 |
| LOC648099    | -0.0799      | 0.0846       | 0.1129       | -0.1596      | 0.001833333  |
| WARS         | -0.1511      | -0.2168      | 0.048766667  | -0.348833333 | -0.300266667 |
| MAPRE2       | 0.1089       | 0.178766667  | 0.013166667  | -0.070766667 | -0.089       |
| MSX2         | -0.011033333 | 0.096666667  | 0.044266667  | -0.141033333 | -0.1031      |
| ANKRD44      | -0.032066667 | 0.583166667  | -0.089933333 | -0.089866667 | 0.138        |
| PGBD1        | 0.306        | 0.2315       | -0.0174      | 0.111033333  | 0.023333333  |
| VAR52        | 0.2107       | -0.017066667 | 0.014866667  | -0.128233333 | -0.014566667 |
| HERC6        | -0.0381      | 0.006166667  | -0.025933333 | -0.175366667 | -0.132133333 |
| RABL5        | 0.082566667  | 0.0212       | -0.0056      | -0.079133333 | -0.147933333 |
| VGFB         | 0.150166667  | -0.181633333 | 0.758866667  | -0.147366667 | 0.0128       |
| S100A3       | -0.065333333 | 0.0685       | 0.646333333  | -0.111933333 | 0.050566667  |
| UBN2         | -0.105866667 | -0.0115      | 0.196566667  | -0.0997      | -0.053133333 |
| SSH1         | 0.1009       | 0.0122       | 0.309233333  | -0.043533333 | 0.004266667  |
| LOC441642    | -0.312233333 | 0.091433333  | -0.0866      | -0.319166667 | 0.001666667  |
| RBM3         | 0.382433333  | -0.016333333 | -0.148266667 | 0.1714       | -0.076166667 |
| FNBP1        | -0.324333333 | -0.007566667 | 0.274866667  | -0.310566667 | -0.131233333 |
| RPS6P1       | -0.163866667 | 0.069166667  | 0.004133333  | -0.1315      | -0.184733333 |
| PARP11       | 0.096733333  | -0.0472      | -0.156833333 | -0.284233333 | -0.1052      |
| OR2A20P      | 0.125533333  | 0.2134       | -0.023033333 | 0.075866667  | -0.0966      |
| SNRNP25      | 0.190233333  | 0.135766667  | 0.027666667  | 0.1065       | -0.083833333 |
| DNAJC18      | -0.094633333 | 0.099        | 0.068766667  | -0.144566667 | -0.1039      |
| TES          | -0.0516      | -0.013366667 | 0.127166667  | -0.0601      | -0.0814      |
| LOC728919    | -0.021466667 | 0.058733333  | 0.006466667  | -0.2779      | 0.0157       |

|           |              |              |              |              |              |
|-----------|--------------|--------------|--------------|--------------|--------------|
| DDR GK1   | 0.0222       | 0.140566667  | -0.0011      | 0.036333333  | -0.130333333 |
| LOC283922 | -0.041766667 | 0.1708       | 0.039266667  | 0.0635       | -0.096933333 |
| GMFB      | 0.031066667  | 0.0145       | 0.0625       | -0.070466667 | -0.088533333 |
| EPHX1     | -0.201566667 | -0.008133333 | 0.197266667  | -0.2119      | -0.1331      |
| MEX3A     | 0.138633333  | -0.033533333 | 0.189066667  | 0.006666667  | -0.075       |
| LAMP2     | -0.0392      | -0.0421      | 0.033133333  | -0.184266667 | -0.206633333 |
| MIR98     | 0.118133333  | -0.023833333 | 0.054        | -0.055633333 | -0.190533333 |
| DCLK3     | 0.2512       | 0.036166667  | 0.166733333  | 0.029266667  | -0.082266667 |
| POLR1B    | 0.067666667  | 0.1476       | 0.179266667  | 0.085966667  | -0.1023      |
| LOC391370 | 0.0023       | 0.029466667  | 0.037066667  | -0.2685      | -0.020533333 |
| GGCT      | 0.309766667  | 0.166833333  | -0.100533333 | 0.1075       | 0.027633333  |
| PXMP3     | 0.047233333  | 0.119366667  | -0.012766667 | -0.046766667 | -0.119833333 |
| LOC731642 | 0.0111       | 0.1085       | 0.034233333  | -0.113533333 | -0.0505      |
| AGRN      | -0.0106      | -0.0909      | 0.167266667  | -0.127466667 | -0.178933333 |
| LOC90586  | -0.266933333 | 0.722        | -0.094066667 | -0.196566667 | 0.032933333  |
| GAPDHL6   | -0.0916      | 0.1374       | 0.177133333  | -0.088733333 | -0.0426      |
| LOC645762 | -0.257933333 | 0.1843       | -0.077133333 | -0.372833333 | 0.016666667  |
| HELZ      | -0.112966667 | -0.057566667 | 0.2769       | -0.080133333 | -0.175066667 |
| SPATA2L   | -0.1678      | 0.019533333  | 0.045066667  | -0.32        | -0.0805      |
| ZNF256    | 0.343766667  | 0.329033333  | -0.214166667 | 0.0857       | 0.074966667  |
| LOC645251 | 0.2664       | 0.291833333  | 0.0163       | 0.1524       | 0.109766667  |
| LOC648057 | 0.177033333  | -0.073       | 0.223        | -0.043833333 | 0.084666667  |
| PELI2     | 0.181333333  | 0.025466667  | 0.0855       | 0.0031       | -0.0489      |
| TATDN3    | 0.101333333  | 0.008866667  | 0.047266667  | -0.0565      | -0.1352      |
| GRK5      | 0.145333333  | 0.1442       | 0.384466667  | -0.055066667 | 0.1785       |
| CD44      | 0.215766667  | 0.0046       | 0.259166667  | 0.027033333  | 0.036233333  |
| TM9SF3    | 0.052433333  | 0.0439       | -0.015333333 | -0.1889      | 0.097        |
| GDPD1     | -0.280033333 | 0.623366667  | -0.052733333 | -0.283166667 | 0.1176       |
| PIM1      | 0.3256       | 0.093433333  | 0.0443       | 0.041        | -0.0523      |
| CAND1     | -0.143933333 | -0.1257      | 0.2652       | -0.178433333 | 0.0455       |
| KIRREL    | 0.001        | -0.023266667 | 0.524166667  | 0.1753       | -0.129333333 |
| FAM54B    | -0.181233333 | 0.017833333  | 0.321933333  | -0.209166667 | -0.074366667 |
| LOC390876 | -0.345566667 | 0.404366667  | -0.262066667 | -0.351833333 | 0.1341       |
| NDUFB1    | -0.019933333 | 0.069366667  | 0.051333333  | -0.223033333 | -0.002066667 |
| LPGAT1    | 0.1117       | -0.0216      | 0.066166667  | 0.0179       | -0.1976      |
| PMS2L5    | 0.0029       | 0.01         | 0.0082       | -0.0684      | -0.180433333 |
| LOC400446 | -0.140866667 | 0.617533333  | -0.1573      | -0.266866667 | 0.1992       |
| LOC137107 | -0.323       | 0.247066667  | -0.159466667 | -0.3371      | -0.034233333 |
| KLHL17    | 0.224433333  | 0.095733333  | 0.0742       | -0.070866667 | -0.055866667 |
| RBM15B    | 0.229533333  | 0.026166667  | 0.128633333  | 0.115933333  | -0.056833333 |
| DDAH1     | 0.473        | 0.160333333  | 0.0105       | 0.2934       | 0.003333333  |
| PTPN9     | 0.1873       | 0.092533333  | -0.0608      | -0.093566667 | -0.082766667 |
| DPYSL2    | 0.0108       | 0.017433333  | 0.094233333  | 0.001        | -0.040366667 |
| C1orf41   | 0.238533333  | 0.1288       | 0.0466       | 0.103566667  | -0.0754      |
| NFATC3    | 0.239566667  | 0.0062       | 0.1004       | 0.0254       | 0.009433333  |
| LOC729340 | -0.099766667 | 0.072266667  | -0.047533333 | -0.103633333 | -0.289133333 |
| CDK5RAP3  | 0.116766667  | -0.0898      | 0.2683       | -0.070133333 | -0.020366667 |

|              |       |              |              |              |              |              |
|--------------|-------|--------------|--------------|--------------|--------------|--------------|
| ZNF280D      |       | 0.1177       | 0.069166667  | -0.013933333 | 0.021133333  | -0.0064      |
| MMP3         |       | -0.1749      | 0.060066667  | 0.250933333  | -0.0901      | -0.0389      |
| UBL7         |       | -0.107833333 | 0.037666667  | 0.1114       | -0.251533333 | -0.0961      |
| AARS2        |       | 0.0345       | 0.235833333  | 0.1443       | -0.0227      | -0.010433333 |
| HMBOX1       |       | 0.017266667  | 0.042533333  | 0.233966667  | -0.0867      | -0.052333333 |
| DBP          |       | -0.2446      | 0.043666667  | 0.1812       | -0.167633333 | -0.153966667 |
| TIMP1        |       | 0.141033333  | 0.083133333  | 0.404766667  | 0.018733333  | 0.071333333  |
| COL9A3       |       | 0.053        | -0.1454      | 0.207        | -0.045833333 | -0.1547      |
| SECISBP2L    |       | 0.008966667  | -0.2116      | 0.160066667  | -0.1049      | -0.178566667 |
| DENR         |       | -0.098366667 | 0.6924       | -0.225366667 | -0.138933333 | 0.0561       |
| LOC100133760 |       | -0.367333333 | -0.0557      | 0.2812       | -0.2269      | -0.1603      |
| CBWD1        |       | -0.099733333 | 0.266966667  | -0.023233333 | -0.0387      | -0.040666667 |
| COQ9         |       | -0.009733333 | -0.183066667 | 0.0893       | -0.1907      | -0.2279      |
| ME1          |       | -0.1906      | -0.0071      | 0.1129       | -0.300933333 | -0.0791      |
| BRWD3        |       | -0.151433333 | 0.139833333  | 0.1664       | -0.1324      | -0.009933333 |
| SETD6        |       | 0.1207       | 0.0681       | -0.083233333 | -0.0307      | -0.062233333 |
| UBE2L6       |       | -0.323133333 | -0.148633333 | 0.351466667  | -0.4764      | -0.0745      |
| EP300        |       | 0.1451       | -0.0324      | 0.107933333  | -0.009066667 | -0.102066667 |
|              | 4-Sep | -0.0008      | -0.0856      | 0.126266667  | -0.1881      | -0.0833      |
| ZBTB44       |       | 0.0818       | 0.1643       | -0.031033333 | 0.088266667  | -0.0796      |
| TRMT12       |       | 0.1521       | 0.020333333  | -0.170033333 | 0.0228       | -0.140766667 |
| LOC646993    |       | 0.236933333  | 0.197866667  | -0.0725      | 0.132633333  | 0.0677       |
| CCDC18       |       | 0.1689       | 0.109033333  | 0.1775       | -0.056633333 | 0.049666667  |
| PIP5K2A      |       | 0.116866667  | 0.009066667  | 0.008666667  | -0.0611      | -0.057866667 |
| CD3EAP       |       | 0.570566667  | 0.1545       | -0.000966667 | 0.3402       | -0.017566667 |
| LOC388907    |       | -0.1658      | 0.219933333  | 0.0496       | -0.241133333 | 0.0399       |
| ZW10         |       | 0.3595       | 0.1974       | 0.015933333  | 0.131233333  | -0.007933333 |
| HKR1         |       | 0.076666667  | 0.058066667  | 0.0207       | 0.017233333  | -0.1684      |
| ZNF567       |       | 0.156066667  | 0.050133333  | 0.032966667  | 0.0467       | -0.091766667 |
| TRAPPC6A     |       | -0.031566667 | -0.071733333 | 0.248966667  | -0.133266667 | -0.1154      |
| ZNF223       |       | -0.218       | 0.733066667  | -0.3283      | -0.263366667 | 0.054833333  |
| FAM177A1     |       | 0.2371       | 0.0553       | 0.096933333  | -0.01        | 0.138933333  |
| STXBP5       |       | 0.162366667  | 0.0254       | 0.084566667  | 0.046466667  | 0.013466667  |
| LOC647086    |       | 0.038766667  | 0.010833333  | 0.0533       | -0.060866667 | -0.193833333 |
| MOV10        |       | -0.2217      | 0.021133333  | 0.4268       | -0.088733333 | -0.1514      |
| KIAA0355     |       | 0.1081       | -0.0153      | 0.155366667  | 0.026966667  | -0.1694      |
| LOC649841    |       | -0.160033333 | 0.070433333  | 0.242533333  | -0.1384      | -0.1763      |
| FLJ39827     |       | 0.5707       | 0.115666667  | 0.046466667  | 0.333733333  | 0.065        |
| PGD          |       | 0.2228       | -0.044       | 0.1259       | -0.066533333 | -0.044433333 |
| ELAC2        |       | 0.268733333  | 0.169533333  | 0.076066667  | 0.035333333  | 0.0252       |
| MAP3K12      |       | -0.096633333 | 0.0623       | 0.265566667  | -0.091066667 | -0.126133333 |
| LIN37        |       | -0.003133333 | 0.005166667  | 0.1567       | -0.167666667 | -0.111133333 |
| TAPBP        |       | -0.008133333 | -0.2313      | 0.2056       | -0.178166667 | -0.193033333 |
| AKR1C4       |       | -0.773566667 | -0.063066667 | 0.356666667  | -0.684333333 | -0.267533333 |
| MGC16121     |       | -0.235       | -0.009066667 | 0.008433333  | -0.397833333 | -0.126633333 |
| HLA-H        |       | 0.057333333  | -0.4354      | 0.031033333  | -0.014733333 | -0.443766667 |
| LOC729402    |       | -0.421       | 0.230066667  | 0.171466667  | -0.1193      | -0.001133333 |



|              |              |              |              |              |              |
|--------------|--------------|--------------|--------------|--------------|--------------|
| ST6GALNAC6   | -0.0397      | -0.0231      | 0.085266667  | -0.1696      | -0.138266667 |
| GLIS3        | -0.105966667 | 0.1058       | 0.2703       | -0.268133333 | 0.019233333  |
| RAG1AP1      | -0.353166667 | -0.083433333 | 0.299433333  | -0.278733333 | -0.118266667 |
| QPRT         | 0.012266667  | -0.022533333 | 0.3212       | -0.070566667 | -0.022033333 |
| REL          | -0.0251      | 0.109533333  | -0.045166667 | -0.2183      | 0.044266667  |
| PECR         | -0.153833333 | -0.056566667 | 0.164866667  | -0.4226      | -0.119766667 |
| POLR1E       | 0.4133       | 0.235633333  | -0.037333333 | 0.191366667  | 0.055233333  |
| TXNDC12      | 0.374133333  | 0.127866667  | -0.061733333 | 0.0373       | -0.027133333 |
| C4orf14      | -0.095       | -0.018566667 | 0.023533333  | -0.168966667 | -0.175133333 |
| C6orf192     | -0.2547      | 0.009566667  | 0.189233333  | -0.346233333 | -0.110633333 |
| SNRPA        | 0.224966667  | 0.235366667  | 0.0354       | 0.1208       | 0.0166       |
| LOC731751    | 0.087466667  | 0.197233333  | 0.012266667  | -0.101533333 | -0.070466667 |
| FYN          | -0.1373      | -0.050233333 | 0.047533333  | -0.236966667 | -0.112033333 |
| ODF2         | 0.216033333  | -0.0196      | 0.027066667  | 0.022933333  | -0.0969      |
| C17orf59     | -0.0435      | -0.024666667 | 0.027833333  | -0.155966667 | -0.1326      |
| ZMYM5        | -0.134433333 | 0.114133333  | 0.116466667  | -0.150033333 | -0.0107      |
| LOC441114    | -0.369033333 | 0.1449       | -0.3546      | -0.533466667 | -0.064933333 |
| LATS2        | 0.2123       | 0.250333333  | 0.049866667  | 0.167166667  | -0.0216      |
| MYO1C        | 0.172433333  | 0.072666667  | 0.2612       | 0.060533333  | -0.0087      |
| LOC552889    | -0.075666667 | -0.0515      | 0.0491       | -0.0396      | -0.380366667 |
| DEDD         | 0.116033333  | -0.026366667 | 0.031633333  | 0.054266667  | -0.158666667 |
| ARL15        | 0.051666667  | 0.0628       | 0.196        | -0.1781      | 0.1551       |
| LOC654350    | -0.4674      | 0.196066667  | -0.231133333 | -0.348       | -0.041866667 |
| ZNF772       | -0.038033333 | 0.012533333  | 0.106233333  | -0.1406      | -0.009033333 |
| DHX29        | 0.181        | 0.044633333  | 0.053        | 0.0371       | -0.050333333 |
| LOC100131452 | -0.028933333 | 0.5864       | -0.090566667 | -0.268133333 | 0.305166667  |
| CARS2        | 0.0822       | 0.151633333  | -0.0557      | -0.118       | -0.1333      |
| FAM53B       | 0.1751       | -0.040433333 | -0.029933333 | -0.0528      | -0.197366667 |
| KLHDC10      | 0.027        | -0.051633333 | 0.053233333  | -0.043866667 | -0.1222      |
| SCMH1        | 0.106633333  | -0.0201      | 0.224266667  | -0.0633      | -0.0484      |
| TUBGCP4      | 0.1006       | 0.2198       | 0.0456       | -0.111733333 | 0.0456       |
| AKR7A3       | -0.2145      | -0.065833333 | 0.079666667  | -0.2776      | -0.224566667 |
| WDR81        | 0.0692       | -0.0981      | 0.139533333  | -0.202533333 | -0.049066667 |
| P704P        | 0.5064       | 0.1715       | 0.042733333  | 0.158033333  | 0.004966667  |
| EIF2C3       | 0.195666667  | 0.047233333  | 0.034033333  | 0.0613       | -0.082266667 |
| TTC30A       | -0.060433333 | -0.060333333 | 0.050433333  | -0.2489      | -0.139133333 |
| ATXN1        | -0.211833333 | 0.060433333  | 0.3331       | -0.165433333 | -0.030266667 |
| ZNF594       | 0.126766667  | -0.0267      | -0.0038      | 0.0905       | -0.123766667 |
| PPT2         | 0.319766667  | 0.0425       | 0.1836       | -0.014966667 | 0.074766667  |
| TTYH3        | -0.095733333 | 0.000133333  | 0.355233333  | -0.039033333 | -0.153366667 |
| FBXL17       | 0.012366667  | 0.056366667  | 0.012233333  | -0.328333333 | -0.035966667 |
| USP8         | -0.2794      | -0.0027      | -0.107366667 | -0.331466667 | -0.1308      |
| TTPAL        | -0.0659      | -0.0692      | 0.096533333  | -0.270033333 | -0.0993      |
| LOC729667    | 0.162266667  | 0.082366667  | 0.1965       | -0.036366667 | 0.085433333  |
| ZNF860       | -0.081766667 | 0.694633333  | -0.073933333 | 0.033033333  | 0.176666667  |
| POMP         | 0.195366667  | 0.035066667  | 0.077833333  | -0.023133333 | -0.052166667 |
| TSTA3        | 0.1935       | 0.0115       | 0.015333333  | 0.014933333  | -0.165       |

|               |              |              |              |              |              |
|---------------|--------------|--------------|--------------|--------------|--------------|
| STK35         | 0.347933333  | 0.0725       | 0.135666667  | 0.2145       | 0.0571       |
| CIRBP         | -0.033966667 | -0.194933333 | -0.137633333 | -0.0767      | -0.4029      |
| SMEK2         | -0.052866667 | -0.097366667 | -0.0116      | -0.1441      | -0.1785      |
| KIAA1267      | -0.1143      | -0.103566667 | 0.042966667  | -0.2238      | -0.049       |
| RHBDL2        | -0.0186      | 0.872633333  | -0.097266667 | -0.0253      | 0.2508       |
| RPL32         | 0.417666667  | 0.0128       | -0.133266667 | -0.0088      | -0.0101      |
| ZCCHC11       | 0.000666667  | 0.066966667  | 0.156233333  | -0.110733333 | -0.1045      |
| ALS2CR14      | -0.049533333 | 0.657333333  | -0.181833333 | -0.113833333 | 0.1853       |
| LOC650298     | 0.164866667  | 0.0807       | 0.043        | -0.026133333 | 0.112333333  |
| NCRNA00081    | -0.112433333 | 0.197833333  | -0.011566667 | -0.193133333 | -0.0585      |
| TOR1B         | 0.1085       | -0.035166667 | 0.188266667  | 0.001833333  | -0.1144      |
| FAM107B       | 0.0751       | -0.0282      | -0.0117      | -0.072066667 | -0.070833333 |
| CLDN15        | 0.054766667  | 0.110033333  | 0.0164       | -0.040733333 | -0.078533333 |
| PABPC4        | 0.313366667  | 0.0326       | -0.014166667 | 0.022966667  | -0.0566      |
| TPD52L1       | -0.326266667 | -0.038633333 | 0.4163       | -0.366333333 | -0.081833333 |
| TCP11L1       | 0.073966667  | 0.0449       | 0.187933333  | 0.027766667  | -0.0231      |
| HMBS          | 0.337        | 0.0682       | 0.067033333  | 0.121533333  | -0.052733333 |
| DDB1          | 0.297        | -0.118866667 | -0.017066667 | -0.005033333 | -0.0626      |
| SPC24         | 0.182466667  | 0.3104       | 0.0592       | 0.032366667  | 0.0813       |
| DPYD          | -0.117433333 | 0.193866667  | 0.150766667  | -0.202       | 0.001        |
| M6PR          | 0.165166667  | -0.0489      | 0.057966667  | 0.0048       | -0.194366667 |
| LOC439949     | 0.089666667  | 0.022833333  | -0.027333333 | -0.084233333 | -0.0525      |
| NUF2          | 0.2013       | 0.334766667  | 0.061766667  | 0.210633333  | 0.065966667  |
| TOMM6         | 0.1576       | 0.049966667  | 0.075366667  | 0.038733333  | -0.077866667 |
| LOC554207     | 0.027133333  | 0.051933333  | -0.0222      | -0.2149      | -0.037066667 |
| HECTD1        | 0.121566667  | 0.123866667  | -0.071633333 | -0.170866667 | -0.023933333 |
| WDR82         | 0.200433333  | 0.056533333  | 0.1858       | 0.063066667  | -0.044066667 |
| TAF15         | 0.430633333  | 0.163466667  | -0.184233333 | 0.081733333  | -0.056166667 |
| XRCC5         | 0.420933333  | 0.1269       | 0.059833333  | 0.253233333  | -0.100933333 |
| RAD21         | 0.138033333  | 0.168533333  | 0.065333333  | -0.004033333 | 0.0177       |
| ZKSCAN1       | -0.442966667 | -0.1633      | 0.2861       | -0.392       | -0.213333333 |
| ING4          | -0.3269      | -0.0417      | 0.111233333  | -0.118766667 | -0.200166667 |
| SUPT4H1       | 0.074233333  | 0.0562       | -0.013166667 | -0.088433333 | -0.090366667 |
| RBM7          | -0.0471      | -0.133466667 | 0.108033333  | -0.1259      | -0.1226      |
| GCN1L1        | -0.017133333 | 0.0245       | 0.328033333  | -0.2438      | 0.0362       |
| RAB30         | 0.210866667  | -0.007033333 | -0.136266667 | -0.0154      | -0.0966      |
| CD99          | -0.026933333 | -0.010833333 | 0.165766667  | -0.170433333 | -0.065666667 |
| FAM175A       | -0.1368      | 0.827366667  | -0.0486      | -0.169333333 | 0.233833333  |
| NADK          | 0.2577       | 0.065633333  | -0.0105      | 0.0527       | -0.047466667 |
| CDK6          | 0.343833333  | 0.238733333  | 0.257133333  | 0.144366667  | 0.1805       |
| PXK           | 0.039633333  | -0.004266667 | -0.221866667 | -0.2334      | -0.199033333 |
| CENPM         | 0.3751       | 0.252333333  | -0.096733333 | 0.117766667  | 0.0372       |
| SNRPD1        | 0.171466667  | 0.334433333  | -0.043866667 | 0.2082       | -0.052866667 |
| DKFZp761P0423 | -0.056533333 | 0.003733333  | -0.034733333 | -0.131366667 | -0.226866667 |
| FKSG30        | 0.604333333  | 0.157766667  | 0.0296       | 0.217633333  | 0.0147       |
| LOC100128510  | -0.0739      | 0.853566667  | -0.059666667 | 0.0223       | 0.248233333  |
| NAPG          | 0.0593       | 0.1206       | 0.190966667  | 0.049966667  | -0.081333333 |

|              |              |              |              |              |              |
|--------------|--------------|--------------|--------------|--------------|--------------|
| RPL23        | 0.020033333  | 0.190333333  | -0.113866667 | -0.175733333 | -0.019766667 |
| MRPL24       | 0.0862       | 0.096633333  | -0.006533333 | -0.128533333 | 0.010366667  |
| PCBD1        | -0.154466667 | -0.062266667 | 0.089133333  | -0.2491      | -0.223833333 |
| XRCC6BP1     | 0.1105       | 0.296066667  | -0.048766667 | -0.0494      | -0.0564      |
| EMG1         | 0.3475       | 0.198333333  | -0.065       | 0.246466667  | -0.045433333 |
| NDUFA13      | -0.144966667 | -0.207466667 | 0.165033333  | -0.3579      | -0.271866667 |
| LOC389672    | -0.239533333 | 0.230066667  | 0.060133333  | -0.143166667 | 0.013866667  |
| DMXL1        | -0.163433333 | -0.013       | 0.028133333  | -0.306133333 | -0.150466667 |
| CCDC125      | -0.139866667 | 0.7553       | -0.127666667 | -0.193033333 | 0.138466667  |
| RP5-1022P6.2 | -0.014       | 0.0432       | -0.1401      | -0.219266667 | -0.1684      |
| NRCAM        | -0.023233333 | 0.006033333  | 0.283333333  | -0.1796      | -0.0605      |
| CART1        | -0.063166667 | 0.010666667  | 0.049566667  | -0.2381      | -0.150066667 |
| IAH1         | -0.0965      | -0.023466667 | 0.274433333  | -0.079633333 | -0.115366667 |
| GNAQ         | 0.202933333  | 0.161333333  | 0.080633333  | 0.0483       | 0.027066667  |
| SCARNA10     | 0.468533333  | 0.262466667  | 0.084133333  | 0.268033333  | -0.042333333 |
| CCNF         | 0.117333333  | 0.243266667  | 0.143933333  | 0.142733333  | -0.075366667 |
| ZNF766       | -0.0458      | -0.0433      | 0.075433333  | -0.120266667 | -0.111533333 |
| IL17RD       | -0.133466667 | 0.8188       | -0.1708      | -0.1799      | 0.211966667  |
| PSIP1        | -0.0321      | -0.096266667 | 0.0786       | -0.162733333 | -0.070766667 |
| LOC440349    | 0.228366667  | 0.1276       | -0.010366667 | -0.0297      | -0.0204      |
| TOP3A        | 0.427066667  | 0.204933333  | -0.0798      | 0.070066667  | 0.089766667  |
| USP6NL       | 0.076866667  | 0.185366667  | 0.104166667  | -0.0491      | 0.032666667  |
| TEAD2        | -0.268333333 | 0.0857       | 0.507566667  | -0.318466667 | 0.000733333  |
| SUB1         | -0.052166667 | 0.042466667  | 0.005833333  | -0.186966667 | -0.0603      |
| LPAR1        | 0.338366667  | 0.220066667  | 0.0836       | 0.312333333  | 0.109066667  |
| NFIX         | -0.075666667 | -0.040633333 | 0.1906       | -0.084       | -0.170633333 |
| SOX4         | -0.188533333 | 0.017333333  | 0.1928       | -0.336066667 | -0.0503      |
| YPEL2        | -0.121233333 | 0.0002       | 0.266633333  | -0.1605      | -0.063033333 |
| GCC1         | -0.212       | -0.070466667 | -0.150933333 | -0.2465      | -0.268833333 |
| MRPL40       | -0.055       | 0.0373       | 0.048233333  | -0.222133333 | -0.160933333 |
| ARHGAP11A    | 0.192466667  | 0.227933333  | 0.005        | 0.122233333  | -0.0332      |
| BMPR1A       | 0.059966667  | 0.155433333  | 0.018033333  | -0.028733333 | -0.151833333 |
| LOC346085    | 0.014333333  | 0.0412       | 0.253966667  | -0.162666667 | 0.0136       |
| RAB1B        | 0.051766667  | 0.087533333  | 0.126366667  | -0.068466667 | -0.082466667 |
| YWHAB        | 0.220266667  | -0.005633333 | 0.083333333  | -0.0427      | 0.0459       |
| CCNB1        | 0.122733333  | 0.374666667  | 0.0852       | -0.0528      | 0.117766667  |
| LRRK1        | 0.029033333  | -0.046366667 | -0.005633333 | -0.109866667 | -0.157333333 |
| PPIB         | -0.117966667 | 0.203        | 0.094866667  | -0.208433333 | 0.183733333  |
| NR1D2        | 0.1053       | 0.040066667  | -0.139233333 | -0.032766667 | -0.001833333 |
| MTIF3        | -0.170233333 | 0.001266667  | 0.0806       | -0.408166667 | -0.0121      |
| ZNF235       | 0.030966667  | 0.086866667  | 0.0076       | -0.205433333 | -0.033233333 |
| FAM160B2     | -0.0225      | -0.0259      | 0.0573       | -0.239633333 | -0.0888      |
| POLR2J2      | 0.082766667  | 0.1676       | 0.001566667  | -0.0644      | 0.021033333  |
| S100A11      | -0.129966667 | 0.095866667  | 0.046        | -0.180966667 | -0.057933333 |
| LCLAT1       | 0.264766667  | 0.161366667  | -0.0498      | -0.034833333 | 0.015433333  |
| LAPTM4A      | -0.108666667 | -0.027933333 | -0.025966667 | -0.211266667 | -0.094       |
| PDLIM5       | 0.1651       | 0.1942       | 0.432233333  | 0.167733333  | -0.025266667 |

|              |              |              |              |              |              |
|--------------|--------------|--------------|--------------|--------------|--------------|
| B4GALT1      | -0.025633333 | -0.094833333 | 0.0746       | -0.147333333 | -0.216633333 |
| EML4         | 0.164766667  | 0.225133333  | 0.0619       | 0.013066667  | -0.010966667 |
| D2HGDH       | -0.079833333 | -0.0312      | 0.166966667  | -0.480133333 | -0.052933333 |
| LOC388344    | -0.634733333 | 0.148533333  | -0.2172      | -0.5341      | -0.101033333 |
| CFH          | 0.0054       | 0.060666667  | 0.066766667  | -0.143066667 | -0.143366667 |
| CYBA         | -0.020566667 | -0.188133333 | 0.410566667  | -0.133333333 | -0.0955      |
| PCAF         | -0.214566667 | 0.034233333  | 0.0708       | -0.2619      | -0.2147      |
| SP4          | 0.273333333  | 0.270366667  | 0.167166667  | -0.0064      | 0.285        |
| C5orf44      | -0.198533333 | 0.036466667  | 0.0817       | -0.1651      | -0.1805      |
| LOC401717    | -0.564733333 | 0.209266667  | -0.611266667 | -0.694366667 | 0.087366667  |
| SP2          | 0.263566667  | 0.045066667  | 0.009766667  | 0.011466667  | -0.110333333 |
| CERCAM       | -0.0688      | -0.098066667 | 0.280566667  | -0.113066667 | -0.143433333 |
| LOC641518    | 0.116633333  | 0.239566667  | 0.126766667  | 0.098933333  | 0.053566667  |
| LOC100133812 | 0.0384       | 0.0514       | 0.010266667  | -0.0084      | -0.131033333 |
| LOC649009    | 0.130633333  | 0.091033333  | 0.177566667  | -0.0003      | -0.1228      |
| ZNF181       | -0.113366667 | -0.196733333 | 0.018666667  | -0.265033333 | -0.203633333 |
| C20orf3      | 0.184966667  | 0.054133333  | -0.030466667 | 0.098866667  | -0.206733333 |
| DLGAP5       | 0.199833333  | 0.2526       | 0.032566667  | 0.2187       | -0.067033333 |
| TUBB         | 0.377133333  | 0.012533333  | 0.278766667  | 0.035266667  | -0.0512      |
| THUMPD1      | 0.111033333  | 0.2245       | -0.075333333 | 0.018166667  | 0.031533333  |
| TMEM173      | -0.001333333 | -0.029966667 | 0.3137       | -0.0011      | -0.090566667 |
| LOC100133477 | 0.1517       | 0.0778       | 0.1029       | -0.086133333 | -0.027966667 |
| RPL21        | 0.004        | 0.109233333  | -0.062633333 | -0.113366667 | -0.173333333 |
| RNF20        | 0.023533333  | 0.021233333  | -0.1165      | -0.070666667 | -0.182366667 |
| ZBED4        | 0.352833333  | 0.052966667  | 0.137133333  | 0.047        | 0.049566667  |
| LOC643882    | -0.1539      | 0.764866667  | -0.327833333 | -0.165366667 | 0.096733333  |
| CCNG2        | -0.3859      | 0.011466667  | 0.487333333  | -0.260566667 | -0.066366667 |
| LOC100131735 | 0.2777       | 0.265866667  | 0.078333333  | 0.070233333  | -0.062833333 |
| APOA1BP      | -0.2384      | -0.005433333 | 0.306566667  | -0.199666667 | -0.084333333 |
| LOC388275    | 0.3135       | 0.045566667  | 0.116633333  | 0.090233333  | 0.017566667  |
| MIR1978      | 0.644966667  | -0.012       | -0.2786      | 0.3114       | -0.017933333 |
| LOC100130178 | 0.1796       | 0.183866667  | 0.0902       | 0.0861       | -0.110033333 |
| KLHL9        | -0.149933333 | 0.049566667  | 0.167566667  | -0.214533333 | -0.029       |
| ELMO2        | 0.196233333  | 0.0244       | -0.0134      | 0.046433333  | -0.2189      |
| LOC728310    | -0.200166667 | 0.626366667  | -0.1693      | -0.168033333 | 0.1104       |
| OXCT1        | 0.203533333  | 0.1032       | -0.146966667 | -0.018566667 | -0.132333333 |
| GUSBL1       | 0.0031       | -0.046633333 | 0.1619       | -0.230733333 | -0.1222      |
| RCOR3        | 0.062633333  | -0.262333333 | -0.015333333 | -0.124433333 | -0.244266667 |
| TTC15        | 0.1306       | -0.0607      | 0.057        | -0.144466667 | -0.0968      |
| EDEM3        | -0.203933333 | -0.029366667 | 0.1518       | -0.246166667 | 0.144633333  |
| LOC649447    | -0.128566667 | -0.028366667 | 0.293266667  | -0.229833333 | -0.146166667 |
| HSGT1        | -0.013466667 | 0.160433333  | 0.1022       | 0.0611       | -0.1362      |
| SLC7A3       | -0.241333333 | 0.151966667  | -0.198266667 | -0.265766667 | -0.167433333 |
| LOC283267    | 0.1482       | 0.005466667  | -0.016966667 | -0.0345      | -0.240166667 |
| CDH13        | -0.069533333 | -0.041566667 | 0.0403       | -0.131633333 | -0.2731      |
| MESDC1       | 0.442366667  | 0.111        | 0.038433333  | 0.1876       | 0.0073       |
| LOC728755    | -0.261966667 | 0.006933333  | 0.094        | -0.473833333 | -0.2022      |

|              |              |              |              |              |              |
|--------------|--------------|--------------|--------------|--------------|--------------|
| ZNF529       | 0.157333333  | 0.067766667  | 0.0236       | -0.0661      | -0.039633333 |
| ATMIN        | -0.050833333 | 0.0017       | -0.0021      | -0.268633333 | -0.019       |
| RICS         | -0.061966667 | 0.029033333  | 0.0678       | -0.263633333 | -0.169933333 |
| CRELD2       | 0.104833333  | 0.1008       | 0.254266667  | 0.012166667  | 0.029933333  |
| VISA         | 0.1369       | 0.068566667  | -0.061       | -0.096033333 | -0.107266667 |
| HM13         | 0.3318       | -0.180466667 | 0.3425       | -0.0103      | -0.1011      |
| FRMD4A       | 0.1281       | 0.106        | 1.081633333  | 0.049933333  | 0.2121       |
| LOC440498    | 0.1474       | 0.072433333  | 0.2223       | 0.028266667  | -0.014333333 |
| ILKAP        | 0.1966       | 0.280866667  | 0.068266667  | 0.1028       | 0.126833333  |
| MED11        | -0.0551      | 0.0002       | 0.276433333  | -0.113466667 | -0.063633333 |
| COPS7A       | 0.083566667  | 0.075133333  | -0.081466667 | -0.095333333 | -0.010866667 |
| LOC100131294 | -0.1383      | 0.026766667  | 0.2052       | -0.260066667 | -0.1626      |
| METTL13      | 0.2052       | 0.206733333  | 0.132666667  | 0.050866667  | 0.0105       |
| LANCL1       | -0.119133333 | -0.1687      | 0.049866667  | -0.308833333 | -0.0711      |
| RPL6         | 0.385733333  | 0.186166667  | 0.003966667  | 0.1444       | -0.0652      |
| C20orf55     | 0.189433333  | 0.1387       | 0.051433333  | 0.089        | -0.104766667 |
| MED23        | 0.0191       | -0.0457      | 0.0952       | -0.145166667 | -0.130033333 |
| VASN         | 0.2612       | 0.079966667  | 0.3242       | 0.336633333  | -0.031966667 |
| EIF4B        | -0.009066667 | -0.076033333 | 0.193866667  | -0.028133333 | -0.140733333 |
| NDUFAF1      | 0.061166667  | 0.233533333  | -0.001933333 | -0.104933333 | 0.0752       |
| C21orf58     | -0.135866667 | 0.5849       | -0.093833333 | -0.243533333 | -0.049866667 |
| LPL          | 0.071933333  | -0.143166667 | 0.539333333  | 0.159266667  | -0.007266667 |
| DMAP1        | -0.094166667 | 0.171866667  | -0.0247      | -0.079666667 | -0.046566667 |
| PHC1         | 0.1175       | 0.044066667  | 0.209366667  | -0.096666667 | 0.0418       |
| CUTC         | 0.4048       | 0.065066667  | 0.072833333  | 0.159366667  | -0.045666667 |
| DDX46        | 0.4609       | 0.2574       | -0.0675      | 0.2019       | 0.096433333  |
| HOMER1       | 0.1622       | 0.109133333  | 0.075        | -0.0036      | 0.035566667  |
| BAGE         | 0.349166667  | 0.086566667  | 0.0043       | 0.030166667  | -0.017533333 |
| LOC647121    | 0.107766667  | 0.203866667  | 0.0162       | 0.038766667  | 0.0736       |
| KIF2A        | 0.199633333  | 0.055866667  | 0.091633333  | 0.013966667  | -0.0938      |
| LOC100130353 | -0.121966667 | 0.582866667  | -0.0589      | -0.0455      | -0.0295      |
| ATP10B       | -0.097166667 | 0.011866667  | 0.184766667  | -0.1995      | -0.085166667 |
| HEG1         | 0.004833333  | 0.029633333  | 0.160033333  | -0.050966667 | -0.172333333 |
| SF3B5        | 0.217433333  | 0.100333333  | 0.107433333  | 0.0332       | 0.014966667  |
| C2orf28      | -0.111366667 | -0.057866667 | 0.1403       | -0.232833333 | -0.136133333 |
| ZNF616       | 0.178533333  | -0.001433333 | 0.086833333  | -0.108333333 | -0.042966667 |
| ADAR         | 0.020166667  | 0.092666667  | 0.0221       | -0.144566667 | -0.1735      |
| TMEM141      | -0.084766667 | -0.070333333 | 0.150866667  | -0.2296      | -0.1732      |
| IP6K2        | 0.006833333  | 0.215966667  | 0.105        | 0.091066667  | -0.035666667 |
| LOC653226    | 0.061066667  | 0.004433333  | 0.226266667  | -0.057233333 | 0.019233333  |
| UBE2M        | 0.156433333  | 0.1313       | 0.1143       | 0.005166667  | 0.062        |
| C1orf52      | 0.209633333  | 0.136466667  | 0.111433333  | 0.058133333  | 0.0075       |
| SYAP1        | -0.1433      | 0.671233333  | -0.068566667 | -0.170933333 | 0.1032       |
| LOC391169    | -0.197733333 | 0.5746       | -0.2036      | -0.162       | 0.1281       |
| LARS         | 0.0122       | -0.046833333 | 0.070166667  | -0.143333333 | -0.119933333 |
| C5orf53      | -0.044133333 | -0.044333333 | 0.163        | -0.234266667 | -0.181866667 |
| CDR2L        | 0.197133333  | 0.079233333  | 0.144633333  | 0.0482       | 0.030366667  |

|              |              |              |              |              |              |
|--------------|--------------|--------------|--------------|--------------|--------------|
| LOC100130802 | -0.3426      | 0.232933333  | -0.387       | -0.4091      | -0.017333333 |
| TLN2         | 0.220166667  | -0.1948      | -0.396666667 | -0.007466667 | -0.3164      |
| ROR1         | 0.1996       | 0.176        | 0.278066667  | 0.279833333  | 0.007933333  |
| PHIP         | 0.0532       | 0.193866667  | 0.292566667  | -0.0635      | -0.022933333 |
| SCAP         | 0.048133333  | 0.003366667  | 0.179066667  | -0.172033333 | 0.002233333  |
| C11orf10     | 0.179633333  | -0.1728      | 0.0849       | -0.1373      | -0.1401      |
| MPHOSPH8     | -0.017633333 | 0.130233333  | 0.076566667  | -0.117066667 | -0.0086      |
| LOC644809    | 0.1314       | 0.182933333  | 0.083766667  | -0.0847      | -0.010333333 |
| LOC148137    | 0.094566667  | 0.0238       | 0.120366667  | 0.001366667  | -0.0704      |
| RPL23A       | -0.081133333 | 0.087933333  | 0.103433333  | -0.161866667 | -0.118033333 |
| SEMA3B       | -0.312833333 | 0.074166667  | 0.303933333  | -0.357333333 | -0.1147      |
| TSPAN6       | -0.1964      | 0.0717       | 0.108566667  | -0.1954      | -0.175466667 |
| IKBKAP       | 0.0515       | 0.168466667  | 0.003033333  | -0.034833333 | -0.058966667 |
| MOSPD3       | -0.047566667 | 0.0596       | 0.0914       | -0.1079      | -0.095033333 |
| CPD          | -0.0492      | 0.106533333  | 0.016533333  | -0.156033333 | -0.0926      |
| ELOVL4       | 0.0083       | -0.0001      | 0.461533333  | -0.0791      | -0.047666667 |
| JARID1A      | -0.081733333 | 0.114833333  | 0.2597       | -0.024333333 | -0.098266667 |
| TBC1D7       | -0.2452      | -0.030733333 | -0.0582      | -0.356566667 | -0.353366667 |
| DET1         | -0.092166667 | 0.0231       | 0.0746       | -0.1701      | -0.126333333 |
| USP49        | -0.301766667 | 0.772733333  | -0.194266667 | -0.337066667 | 0.026066667  |
| LOC100133887 | 0.240966667  | -0.015       | -0.019466667 | 0.0795       | -0.1036      |
| LOC100131859 | 0.0046       | 0.187333333  | -0.0537      | -0.070833333 | -0.0914      |
| LOC100128771 | -0.0046      | 0.006733333  | 0.145833333  | -0.0021      | -0.1683      |
| LOC100130289 | -0.050933333 | 0.485266667  | -0.127633333 | -0.140766667 | 0.2084       |
| ANK3         | -0.167566667 | -0.0082      | 0.021766667  | -0.335433333 | -0.065966667 |
| CDAN1        | 0.005966667  | 0.488266667  | -0.035133333 | -0.108633333 | -0.003166667 |
| TOR1AIP2     | 0.348633333  | 0.019133333  | 0.251733333  | 0.114233333  | 0.085033333  |
| YAP1         | -0.0902      | 0.234433333  | 0.161733333  | -0.155066667 | -0.039266667 |
| LOC653079    | -0.1798      | 0.303533333  | -0.286266667 | -0.3729      | 0.124233333  |
| BBS10        | 0.104533333  | -0.038566667 | -0.002333333 | -0.143866667 | -0.0668      |
| MRPS11       | 0.098366667  | 0.068533333  | 0.055866667  | -0.143033333 | -0.0633      |
| CRCP         | -0.0508      | 0.6212       | -0.107633333 | -0.051466667 | -0.0628      |
| ANKHD1       | -0.1373      | 0.120033333  | 0.191433333  | -0.084366667 | -0.075866667 |
| PHF10        | 0.409266667  | 0.090566667  | 0.1507       | 0.084333333  | 0.0048       |
| IGSF3        | 0.2345       | 0.0787       | 0.2159       | 0.017666667  | -0.012866667 |
| HNRNPL       | 0.347933333  | -0.0116      | 0.170266667  | 0.096666667  | -0.0399      |
| RECQL4       | 0.176366667  | 0.130166667  | 0.090166667  | 0.026733333  | -0.045333333 |
| GUF1         | 0.1107       | 0.261766667  | -0.0856      | -0.037666667 | -0.0009      |
| LNPEP        | 0.078333333  | -0.003933333 | 0.061533333  | -0.2028      | 0.0034       |
| RGMA         | -0.0243      | -0.082366667 | 0.0405       | -0.198333333 | -0.106533333 |
| TMEM106A     | -0.233       | 1.104566667  | -0.201633333 | -0.1712      | 0.1838       |
| RTN3         | 0.0184       | 0.1748       | -0.113933333 | -0.0327      | -0.116866667 |
| LOC201725    | 0.1684       | 0.2421       | 0.032533333  | 0.091766667  | -0.008266667 |
| PLIN5        | -0.1147      | 0.554933333  | 0.016266667  | -0.175733333 | 0.159633333  |
| LOC648852    | 0.095266667  | 1.059133333  | -0.134866667 | -0.1339      | 0.527866667  |
| LOC119358    | 0.0389       | 0.2115       | -0.079       | -0.1798      | 0.133433333  |
| LOC100129585 | 0.196666667  | 0.2056       | 0.271066667  | 0.100566667  | -0.034466667 |

|              |              |              |              |              |              |
|--------------|--------------|--------------|--------------|--------------|--------------|
| LOC100128936 | -0.082233333 | -0.0051      | 0.079966667  | -0.154866667 | -0.1923      |
| BMPR2        | -0.0076      | -0.001833333 | 0.231766667  | -0.134633333 | -0.063833333 |
| WIPI2        | -0.151966667 | 0.050133333  | 0.200733333  | -0.3163      | 0.0169       |
| MUTED        | -0.011433333 | -0.009566667 | -0.021366667 | -0.295333333 | -0.136066667 |
| TRIP11       | -0.131166667 | -0.009633333 | 0.099133333  | -0.328866667 | -0.0837      |
| SNORD96B     | 0.279533333  | 0.408133333  | -0.064633333 | 0.164966667  | 0.104833333  |
| C9orf100     | 0.155533333  | 0.268466667  | 0.029033333  | 0.014833333  | -0.021233333 |
| HOMER2       | 0.270066667  | 0.061        | -0.126066667 | -0.0486      | -0.1514      |
| RHBDD2       | -0.148633333 | -0.252933333 | 0.223566667  | -0.285266667 | -0.2223      |
| NUP214       | 0.0943       | 0.014233333  | 0.085466667  | -0.1287      | -0.208       |
| TK1          | 0.2593       | 0.0773       | 0.158633333  | 0.144366667  | -0.010266667 |
| LOC729580    | -0.263833333 | -0.161966667 | 0.441866667  | -0.350133333 | -0.196933333 |
| MAP2K2       | -0.061666667 | -0.030166667 | 0.242866667  | -0.0278      | -0.245733333 |
| PPP2R5D      | 0.148        | 0.135733333  | 0.164666667  | 0.050633333  | -0.0046      |
| CCDC106      | -0.489966667 | -0.0096      | 0.470566667  | -0.428933333 | -0.1593      |
| MELK         | 0.349766667  | 0.093        | 0.035733333  | 0.018066667  | -0.108633333 |
| LOC646949    | -0.406966667 | 0.279233333  | -0.6046      | -0.4858      | -0.019833333 |
| ATXN3        | -0.061466667 | 0.0325       | 0.239633333  | -0.2412      | 0.0127       |
| TMCO3        | 0.1497       | -0.047833333 | 0.0463       | -0.1922      | -0.151433333 |
| PFN4         | -0.082533333 | -0.008733333 | 0.0401       | -0.327133333 | -0.0829      |
| MFSD8        | 0.162933333  | 0.0152       | 0.141166667  | -0.061666667 | -0.091966667 |
| DBT          | -0.138766667 | -0.088233333 | 0.100666667  | -0.3814      | -0.076166667 |
| ABCD3        | 0.0154       | 0.120766667  | 0.105366667  | -0.095533333 | -0.126233333 |
| PBRM1        | 0.316133333  | 0.1038       | 0.1929       | 0.148066667  | 0.002633333  |
| LOC387930    | 0.001633333  | 0.1615       | 0.028266667  | -0.0908      | -0.1105      |
| GATAD1       | 0.036566667  | -0.0239      | -0.005433333 | -0.081866667 | -0.312866667 |
| ADORA1       | 0.268433333  | 0.2279       | 0.2801       | -0.0638      | 0.2029       |
| LIX1L        | 0.0526       | 0.030366667  | 0.396333333  | -0.069666667 | -0.0147      |
| HOOK2        | -0.040433333 | -0.073666667 | 0.139166667  | -0.193566667 | -0.245633333 |
| RNF125       | 0.109566667  | 0.2139       | 0.332866667  | -0.0928      | 0.075466667  |
| STRA13       | 0.270933333  | 0.1342       | 0.105        | 0.117033333  | 0.0092       |
| MIR130A      | 0.080866667  | 0.2681       | -0.001833333 | -0.018766667 | 0.0341       |
| TRIM65       | 0.094166667  | 0.143766667  | -0.062366667 | -0.0574      | -0.068133333 |
| HIST1H4J     | 0.021633333  | 0.107133333  | 0.146033333  | -0.099266667 | -0.048233333 |
| STRN4        | 0.2118       | 0.138266667  | 0.047833333  | -0.063633333 | -0.063833333 |
| TBC1D2B      | 0.306        | -0.040566667 | 0.021966667  | 0.0009       | -0.156733333 |
| PCNXL3       | 0.079566667  | -0.090666667 | 0.007433333  | -0.081666667 | -0.279733333 |
| SLC11A2      | -0.104733333 | 0.019733333  | -0.0178      | -0.1943      | -0.127833333 |
| KIF16B       | -0.085566667 | -0.050966667 | 0.0256       | -0.318266667 | -0.017366667 |
| C4orf46      | 0.177966667  | 0.1999       | 0.060966667  | 0.049366667  | -0.053933333 |
| LOC202781    | -0.1148      | 0.658633333  | -0.023       | -0.072466667 | -6.67E-05    |
| DUSP16       | -0.1039      | -0.019533333 | 0.192133333  | -0.198566667 | -0.044566667 |
| AAAS         | 0.089633333  | 0.265166667  | 0.006933333  | -0.0076      | 0.0333       |
| LOC728945    | 0.146533333  | 0.067266667  | -0.0006      | -0.047       | -0.1814      |
| DEPDC1B      | 0.2113       | 0.2886       | 0.255633333  | 0.1286       | 0.062633333  |
| PRO1853      | 0.057133333  | 0.826966667  | -0.164833333 | 0.0202       | 0.104566667  |
| RAB27A       | -0.1085      | 0.319766667  | 0.029333333  | -0.031766667 | -0.0652      |

|              |              |              |              |              |              |
|--------------|--------------|--------------|--------------|--------------|--------------|
| ZNF219       | -0.089166667 | 0.056566667  | -0.009633333 | -0.129466667 | -0.184633333 |
| FLJ40722     | -0.347266667 | 0.8545       | -0.325233333 | -0.364133333 | 0.1938       |
| RBPMS        | 0.054866667  | 0.026966667  | -0.063766667 | -0.0477      | -0.145666667 |
| BRD8         | 0.0712       | 0.2049       | -0.0262      | 0.040533333  | -0.138666667 |
| LOC728553    | -0.0041      | -0.071133333 | 0.1805       | -0.222766667 | -0.122966667 |
| PILRA        | 0.046666667  | 0.7123       | 0.0215       | 0.106433333  | 0.111833333  |
| IP6K1        | 0.090333333  | 0.107466667  | 0.034866667  | -0.065033333 | -0.0683      |
| ZNF234       | 0.0808       | -0.0309      | 0.318733333  | -0.044966667 | -0.042266667 |
| LRRC28       | -0.096066667 | -0.1183      | 0.167166667  | -0.282366667 | -0.256       |
| KIF1B        | -0.287733333 | -0.052133333 | 0.131733333  | -0.1061      | -0.292       |
| C1orf96      | 0.055166667  | 0.121433333  | 0.2407       | -0.046533333 | -0.014033333 |
| LOC727848    | 0.2722       | 0.078733333  | -0.035666667 | -0.054433333 | 0.052633333  |
| LOC100131096 | -0.203733333 | 0.788166667  | -0.3151      | -0.200833333 | 0.173733333  |
| ITGB7        | -0.086566667 | 0.0084       | 0.080533333  | -0.264533333 | -0.016366667 |
| GTF2H5       | 0.0489       | -0.064233333 | 0.1349       | -0.214033333 | -0.066466667 |
| SMAD2        | 0.078066667  | 0.099333333  | 0.004966667  | -0.063066667 | -0.170533333 |
| LOC126235    | -0.334066667 | 0.271533333  | -0.186733333 | -0.333066667 | -0.0243      |
| NRBP1        | 0.0373       | 0.028666667  | 0.0782       | -0.009666667 | -0.1868      |
| CHSY1        | 0.3325       | 0.0723       | 0.323233333  | 0.169533333  | 0.069366667  |
| CBL          | 0.229833333  | 0.0709       | 0.3107       | 0.025066667  | -0.0028      |
| TTC12        | -0.0625      | 0.1658       | 0.0744       | -0.011166667 | -0.052633333 |
| RPUSD2       | 0.3394       | 0.136366667  | -0.050433333 | 0.085233333  | 0.0177       |
| PNRC2        | -0.048       | 0.245066667  | 0.0889       | -0.082533333 | -0.044566667 |
| LOC728142    | 0.1378       | 0.018766667  | -0.034633333 | -0.007033333 | -0.183033333 |
| SNORD33      | 0.173333333  | 0.112533333  | 0.052533333  | 0.091166667  | -0.108966667 |
| LOC644096    | 0.3068       | 0.0923       | 0.042133333  | 0.0478       | -0.013966667 |
| KRT8P9       | -0.168066667 | 0.392466667  | -0.0253      | -0.2004      | 0.242566667  |
| UBE2G2       | 0.4972       | 0.094566667  | -0.046266667 | 0.210233333  | -0.0399      |
| LOC644284    | -0.231733333 | 0.088166667  | 0.1983       | -0.1233      | -0.147366667 |
| TMEM135      | -0.291533333 | -0.0557      | 0.213833333  | -0.332766667 | -0.237166667 |
| HELLS        | 0.2947       | -0.007066667 | 0.170866667  | 0.012166667  | 0.0535       |
| LOC390183    | -0.4172      | 0.1061       | -0.1249      | -0.564966667 | -0.099433333 |
| FLJ20273     | -0.288633333 | 0.001933333  | 0.126766667  | -0.5265      | -0.015366667 |
| CARD14       | 0.090833333  | -0.025033333 | 0.177466667  | -0.123866667 | -0.031733333 |
| NCRNA00092   | 0.0026       | 0.274133333  | 0.132        | -0.115866667 | -0.014966667 |
| NDUFA9       | 0.126866667  | 0.1665       | 0.0807       | -0.0554      | -0.0432      |
| LOC643319    | 0.5324       | 0.037833333  | 0.101633333  | 0.311633333  | -0.123466667 |
| GMFG         | 0.067666667  | 0.039533333  | 0.2742       | 0.011533333  | -0.064833333 |
| ZFP36        | 0.1054       | 0.096033333  | 0.0246       | -0.0076      | -0.337333333 |
| LOC100133517 | 0.209566667  | 0.110733333  | 0.0886       | 0.0605       | -0.0503      |
| OTUB1        | 0.105566667  | 0.008466667  | -0.083033333 | -0.1062      | -0.2012      |
| WDR27        | -0.207733333 | 0.058833333  | 0.0544       | -0.1759      | -0.1134      |
| IFT88        | -0.302133333 | 0.0653       | 0.2552       | -0.184133333 | -0.099033333 |
| MYL9         | 0.034666667  | -0.031866667 | 0.275066667  | -0.107066667 | -0.043233333 |
| PIK3CD       | 0.213933333  | 0.1265       | 0.205033333  | 0.0526       | -0.080566667 |
| CCT6B        | -0.103433333 | -0.030733333 | 0.0996       | -0.0147      | -0.338333333 |
| KIF11        | 0.277633333  | 0.274033333  | 0.1429       | 0.273933333  | -0.0841      |



|              |              |              |              |              |              |
|--------------|--------------|--------------|--------------|--------------|--------------|
| HYOU1        | 0.070466667  | 0.045966667  | -0.005266667 | -0.251433333 | -0.096333333 |
| HNRPH3       | 0.0559       | 0.271966667  | 0.1332       | -0.121433333 | 0.183933333  |
| ZNF385A      | -0.1145      | -0.055933333 | 0.1995       | -0.3615      | -0.1401      |
| MIPEP        | 0.1396       | 0.037466667  | 0.041166667  | -0.0991      | -0.106333333 |
| LOC727726    | 0.198933333  | 0.113466667  | 0.0225       | 0.019566667  | 0.008233333  |
| C17orf37     | -0.1242      | 0.058766667  | -0.004566667 | -0.2489      | -0.121033333 |
| PMS2         | 0.1688       | 0.1078       | -0.027833333 | -0.078133333 | -0.007466667 |
| MCM3AP       | 0.155266667  | 0.138566667  | 0.207533333  | -0.033566667 | -0.026133333 |
| HADHB        | -0.138633333 | -0.0277      | 0.153066667  | -0.318233333 | -0.092033333 |
| FAM63B       | -0.142433333 | 0.078166667  | 0.240433333  | -0.1981      | -0.061266667 |
| TIAM1        | -0.0033      | 0.207866667  | 0.4511       | -0.0603      | 0.091466667  |
| LTBP3        | -0.103066667 | 0.0904       | 0.474133333  | -0.319133333 | -0.135433333 |
| C1orf151     | 0.124        | 0.0455       | 0.094366667  | -0.009566667 | -0.127566667 |
| MAP3K4       | 0.1185       | 0.084666667  | -0.044       | 0.035066667  | -0.149933333 |
| FLJ35282     | -0.2685      | -0.089433333 | 0.3595       | -0.461333333 | -0.218733333 |
| C9orf116     | -0.072633333 | -0.0205      | 0.198066667  | -0.2448      | -0.1016      |
| PCM1         | -0.032566667 | 0.002166667  | 0.022833333  | -0.116733333 | -0.150733333 |
| NIPBL        | -0.0994      | 0.103866667  | 0.149633333  | -0.063       | -0.0397      |
| LOC644384    | -0.2618      | 0.273033333  | -0.2546      | -0.396266667 | 0.065266667  |
| POLR2K       | 0.0586       | 0.188466667  | 0.123133333  | 0.027066667  | 0.0199       |
| LOC100131971 | 0.156033333  | 0.266666667  | 0.0185       | 0.076766667  | -0.012733333 |
| LOC100130387 | 0.312366667  | 0.009133333  | 0.085233333  | 0.103133333  | -0.1128      |
| LOC100131835 | -0.0273      | 0.662666667  | -0.2031      | -0.0089      | 0.1          |
| LOC728002    | -0.241333333 | 0.0782       | -0.140666667 | -0.2091      | -0.1647      |
| FURIN        | 0.194666667  | -0.004366667 | 0.239433333  | 0.0223       | -0.062966667 |
| MRPL34       | -0.087866667 | -0.021533333 | 0.1787       | -0.230266667 | -0.1588      |
| MRPL9        | 0.108333333  | 0.188966667  | -0.037466667 | 0.061133333  | -0.1169      |
| ZNF250       | 0.093266667  | -0.0474      | 0.163033333  | -0.015966667 | -0.1833      |
| ASXL1        | 0.113733333  | -0.090666667 | 0.133966667  | -0.013966667 | -0.214733333 |
| GBA2         | -0.007       | 0.115066667  | 0.012533333  | -0.1037      | -0.1449      |
| HNRNPUL1     | 0.207766667  | 0.163766667  | 0.086266667  | -0.048466667 | -0.0478      |
| SNORD73A     | 0.170866667  | 0.336        | -0.084066667 | 0.037733333  | -0.066       |
| GPX4         | -0.2225      | -0.102166667 | 0.1756       | -0.280566667 | -0.350733333 |
| DEF8         | -0.050566667 | -0.103366667 | 0.120066667  | -0.1944      | -0.1582      |
| OIP5         | 0.183533333  | 0.196133333  | 0.004033333  | -0.013066667 | 0.0453       |
| BCAT2        | 0.060533333  | 0.0085       | 0.132        | -0.2026      | -0.067466667 |
| NCOR1        | 0.099766667  | 0.018166667  | 0.140833333  | 0.008333333  | -0.1523      |
| DTL          | 0.411566667  | 0.1379       | 0.0851       | 0.129666667  | 0.001833333  |
| FAM59A       | 0.049333333  | 0.0704       | 0.007033333  | -0.198266667 | -0.105866667 |
| CRK          | 0.433766667  | 0.053333333  | 0.004666667  | 0.057433333  | -0.106133333 |
| PCDHA1       | -0.118466667 | -0.031333333 | 0.2469       | -0.347033333 | 0.0537       |
| GBAS         | -0.185366667 | 0.1045       | 0.0894       | -0.2751      | -0.135866667 |
| BLM          | 0.5835       | 0.052066667  | -0.0371      | 0.072433333  | -0.014033333 |
| CALR         | 0.008933333  | 0.110866667  | 0.1855       | -0.052266667 | -0.0592      |
| CCBE1        | -0.0166      | 0.8023       | -0.074466667 | -0.157066667 | 0.302333333  |
| SNRPE        | 0.054466667  | 0.271366667  | -0.049233333 | -0.1022      | 0.147833333  |
| ATP5J        | 0.227333333  | 0.122833333  | 0.1573       | -0.041433333 | 0.051        |

|              |              |              |              |              |              |
|--------------|--------------|--------------|--------------|--------------|--------------|
| LOC286157    | 0.036733333  | 0.127066667  | 0.052366667  | -0.000766667 | -0.222366667 |
| LOC644101    | 0.3239       | 0.1986       | 0.127633333  | 0.109666667  | 0.104266667  |
| UBXN2B       | -0.0684      | 0.0194       | 0.035533333  | -0.256033333 | -0.139933333 |
| XPO1         | 0.064633333  | 0.1745       | 0.1269       | -0.048233333 | -0.004666667 |
| MYL12A       | 0.186366667  | -0.0522      | 0.1918       | 0.0115       | -0.125466667 |
| TCF20        | 0.256633333  | 0.113433333  | 0.334066667  | 0.099133333  | 0.134566667  |
| LOC100130624 | -0.404933333 | 0.159666667  | -0.155333333 | -0.421433333 | -0.0676      |
| PEX5         | 0.076233333  | -0.075933333 | 0.017166667  | -0.1737      | -0.156566667 |
| LOC400657    | -0.006233333 | 0.002366667  | -0.2377      | -0.231433333 | -0.155266667 |
| ZBTB34       | 0.313633333  | 0.166766667  | 0.042166667  | 0.0701       | -0.2183      |
| DCP2         | 0.432833333  | 0.136266667  | 0.1929       | 0.089566667  | 0.1494       |
| PPP2R4       | 0.051566667  | 0.1048       | 0.252833333  | -0.097733333 | -0.006833333 |
| FAM110A      | 0.429        | 0.186366667  | -0.010133333 | 0.031466667  | 0.070233333  |
| ELOVL5       | 0.058533333  | 0.0344       | 0.1715       | -0.000633333 | -0.054566667 |
| IFITM2       | -0.126666667 | -0.140566667 | 0.436        | -0.221866667 | -0.042866667 |
| NR1H2        | 0.1989       | 0.034166667  | 0.0914       | -0.025433333 | -0.161733333 |
| ZNF365       | 0.133733333  | 0.2255       | 0.1111       | 0.0339       | -0.108466667 |
| ASB3         | -0.085566667 | 0.1329       | 0.190933333  | -0.129566667 | -0.034733333 |
| CNO          | 0.035566667  | 0.0651       | 0.002633333  | -0.049366667 | -0.114566667 |
| LOC100130856 | 0.0746       | 0.1269       | -0.020866667 | -0.146366667 | -0.068333333 |
| ABL1         | -0.008966667 | 0.000666667  | 0.112633333  | -0.166433333 | -0.131566667 |
| ZER1         | 0.026133333  | -0.066066667 | 0.0551       | -0.098766667 | -0.131066667 |
| MIR488       | 0.067433333  | 0.052766667  | 0.1275       | 0.014033333  | -0.116533333 |
| WDR46        | 0.4146       | 0.096933333  | 0.0658       | 0.196833333  | -0.0965      |
| SOCS2        | 0.015166667  | -0.182433333 | 0.132833333  | -0.092533333 | -0.2389      |
| JMY          | -0.151866667 | -0.0966      | 0.088933333  | -0.346166667 | -0.088733333 |
| RABGGTB      | -0.032866667 | 0.102233333  | 0.1259       | -0.246966667 | -0.1655      |
| LOC100127893 | -0.481933333 | 0.276933333  | -0.5367      | -0.6152      | 0.0292       |
| ZNF286A      | 0.469333333  | 0.086533333  | -0.034466667 | 0.128366667  | -0.043066667 |
| PSPC1        | 0.347066667  | 0.19         | 0.0354       | 0.1958       | -0.076266667 |
| TP53TG3      | -0.338266667 | 0.0748       | 0.045833333  | -0.393333333 | -0.082233333 |
| TRAPPC4      | 0.231266667  | 0.125033333  | 0.181        | 0.0418       | 0.028866667  |
| LOC652330    | 0.0743       | -0.016433333 | 0.419033333  | -0.100066667 | -0.221066667 |
| EML3         | -0.059433333 | -0.034533333 | 0.304233333  | -0.114833333 | -0.1923      |
| SLC24A1      | -0.2839      | 0.073433333  | 0.0645       | -0.2411      | -0.181833333 |
| LOC388532    | 0.0175       | 0.103833333  | -0.030133333 | -0.1507      | 0.0073       |
| PTPRU        | -0.078666667 | -0.0288      | 0.0732       | -0.169166667 | -0.193133333 |
| BRP44        | -0.010266667 | 0.027266667  | 0.1067       | -0.160066667 | -0.0673      |
| SRRM2        | 0.142533333  | 0.0055       | 0.012733333  | -0.200966667 | -0.1755      |
| FAM176A      | 0.584133333  | 0.1581       | -0.0318      | 0.210933333  | 0.108866667  |
| LOC641848    | -0.418533333 | 0.1254       | -0.112833333 | -0.427233333 | -0.177433333 |
| TRPS1        | -0.1051      | 0.081333333  | 0.040933333  | -0.3141      | -0.228166667 |
| LOC401321    | -0.032566667 | -0.1018      | 0.314633333  | -0.250533333 | -0.090066667 |
| UBE2V2       | 0.195466667  | 0.0699       | 0.0448       | -0.1159      | 0.035        |
| TJP1         | 0.211433333  | 0.187566667  | 0.0385       | 0.165833333  | -0.077666667 |
| LOC100128423 | -0.378333333 | 0.309566667  | -0.3087      | -0.394566667 | 0.019466667  |
| RNASEH2A     | 0.116733333  | 0.111866667  | 0.123633333  | -0.0412      | -0.043233333 |

|              |              |              |              |              |              |
|--------------|--------------|--------------|--------------|--------------|--------------|
| SKA2         | 0.239966667  | 0.187766667  | 0.073266667  | 0.1212       | -0.069433333 |
| LOC652045    | 0.062366667  | 0.090433333  | 0.124766667  | -0.1904      | -0.0154      |
| AACS         | 0.004033333  | 0.050466667  | 0.136533333  | -0.184866667 | -0.1448      |
| LOC390578    | -0.6719      | 0.210666667  | -0.1804      | -0.6447      | -0.015       |
| ZNF689       | 0.334233333  | 0.106633333  | -0.043566667 | -0.065433333 | 0.061066667  |
| RAB3GAP2     | -0.075       | 0.019166667  | 0.1008       | -0.161866667 | -0.186033333 |
| IFIH1        | -0.2934      | -0.0091      | 0.135066667  | -0.3097      | -0.139833333 |
| VPS13C       | -0.111366667 | -0.015066667 | 0.243766667  | -0.248933333 | -0.161566667 |
| RFX5         | 0.111333333  | 0.1075       | 0.158833333  | -0.131666667 | -0.045666667 |
| LOC390345    | -0.150433333 | 0.096666667  | 0.0725       | -0.078933333 | -0.195366667 |
| LOC727818    | 0.050133333  | 0.184133333  | 0.045866667  | -0.054766667 | -0.107466667 |
| KIAA0460     | 0.2056       | -0.001766667 | 0.230966667  | -0.0494      | -0.0567      |
| CRNKL1       | -0.013966667 | 0.155633333  | 0.041233333  | -0.115433333 | -0.017       |
| LOC644029    | -0.115866667 | 0.1878       | 0.030766667  | -0.1489      | -0.229533333 |
| LOC730107    | 0.085633333  | -0.0171      | -0.036566667 | -0.127433333 | -0.122       |
| ENPP1        | -0.037666667 | -0.000466667 | 0.0912       | -0.1236      | -0.177933333 |
| MYO1B        | 0.200233333  | 0.0375       | 0.169233333  | -0.0172      | 0.089133333  |
| SCNN1D       | -0.018066667 | 0.110166667  | 0.075333333  | -0.082333333 | -0.0527      |
| SNAPIN       | -0.0578      | 0.0537       | 0.1126       | -0.174733333 | -0.1789      |
| PIGY         | 0.111633333  | -0.089666667 | 0.046466667  | -0.1168      | -0.223466667 |
| SLCO3A1      | 0.036366667  | 0.020533333  | 0.169133333  | -0.0805      | -0.171766667 |
| ZNF25        | 0.0755       | 0.013        | 0.069833333  | -0.2007      | -0.1104      |
| ROBLD3       | -0.102       | -0.025766667 | 0.132166667  | -0.1981      | -0.157466667 |
| ARHGAP19     | 0.4387       | 0.178833333  | 0.043866667  | 0.264266667  | -0.0736      |
| FBXO6        | -0.156266667 | 0.010766667  | 0.072933333  | -0.3845      | -0.1901      |
| ABCB10       | 0.282333333  | 0.046066667  | 0.109133333  | 0.046233333  | -0.059566667 |
| SNX7         | -0.071233333 | 0.216266667  | 0.118733333  | -0.107866667 | -0.063066667 |
| FKRP         | 0.1623       | 0.0189       | 0.189066667  | -0.001066667 | -0.0785      |
| LIN7B        | -0.108066667 | -0.108433333 | 0.208766667  | -0.2477      | -0.186966667 |
| LOC100128737 | 0.327933333  | 0.025533333  | -0.007466667 | 0.0774       | -0.044666667 |
| LZTS1        | -0.0395      | 0.0127       | 0.1804       | -0.122533333 | -0.150866667 |
| PANK1        | 0.0504       | -0.143333333 | 0.149566667  | -0.0929      | -0.157566667 |
| PDE8A        | -0.043233333 | 0.211833333  | 0.1073       | -0.159       | -0.016133333 |
| FAM176B      | -0.068633333 | 0.1014       | 0.285666667  | -0.018733333 | -0.0749      |
| GOLGA3       | 0.030533333  | -0.041233333 | 0.2313       | -0.1731      | -0.1877      |
| HIST3H2A     | 0.132766667  | 0.007466667  | -0.0734      | 0.024233333  | -0.1068      |
| SNORD52      | 0.2262       | 0.3128       | -0.208466667 | -0.141633333 | 0.0566       |
| RNF40        | 0.160666667  | 0.028066667  | 0.0854       | -0.0435      | -0.063       |
| TOB1         | -0.125233333 | -0.135966667 | 0.2726       | -0.274       | -0.246166667 |
| CD302        | -0.0068      | -0.078633333 | 0.233733333  | -0.258266667 | 0.030933333  |
| G6PD         | -0.0474      | -0.1243      | 0.328433333  | -0.248466667 | -0.116633333 |
| LOC649553    | 0.063433333  | -0.110666667 | 0.142066667  | -0.114966667 | -0.231333333 |
| FRMD6        | 0.1024       | -0.1772      | 0.258533333  | 0.251133333  | -0.3067      |
| TADA3        | -0.360433333 | 0.109566667  | 0.1698       | -0.3793      | -0.1654      |
| C1orf63      | -0.132033333 | 0.024766667  | 0.103333333  | -0.237066667 | -0.215033333 |
| GIYD1        | 0.106666667  | 0.171266667  | 0.1634       | -0.067233333 | -0.019166667 |
| LOC644191    | 0.1238       | 0.001833333  | 0.0554       | -0.120866667 | -0.1644      |

|              |              |              |              |              |              |
|--------------|--------------|--------------|--------------|--------------|--------------|
| FBXO34       | 0.2164       | 0.023266667  | 0.1163       | 0.049966667  | -0.090966667 |
| EIF3H        | -0.1279      | 0.032433333  | 0.076033333  | -0.1447      | -0.2067      |
| LOC645157    | -0.1958      | 0.1333       | -0.0975      | -0.338266667 | -0.0372      |
| GPS2         | -0.0613      | -0.0162      | 0.138466667  | -0.1255      | -0.107033333 |
| CS           | 0.2356       | -0.003566667 | 0.094366667  | 0.0085       | -0.1498      |
| USF1         | 0.428133333  | 0.0326       | -0.003166667 | -0.026266667 | 0.029933333  |
| FKBP10       | 0.1532       | -0.090266667 | 0.246566667  | -0.022966667 | -0.221933333 |
| PLIN2        | -0.234133333 | -0.1149      | 0.298266667  | -0.401466667 | -0.093466667 |
| LOC644039    | 0.058066667  | 0.094866667  | 0.021033333  | -0.185666667 | -0.019366667 |
| GTF3C6       | 0.385666667  | 0.154733333  | 0.0434       | 0.036666667  | 0.2358       |
| LMOD3        | -0.078166667 | 0.896866667  | -0.044433333 | -0.074033333 | 0.146333333  |
| LOC728791    | -0.2052      | 0.086666667  | -0.070766667 | -0.377       | -0.149833333 |
| RAB43        | 0.036633333  | 0.070333333  | 0.234666667  | -0.063866667 | -0.021233333 |
| TMEM216      | 0.066966667  | 0.223466667  | 0.032933333  | -0.1115      | 0.0661       |
| ARSJ         | 0.0618       | 0.1289       | 0.252066667  | -0.118433333 | 0.0336       |
| RPS9         | 0.054533333  | -0.0499      | 0.260666667  | -0.0386      | -0.155266667 |
| PRKD3        | 0.100433333  | 0.0152       | 0.108933333  | 0.056833333  | -0.185       |
| ALPP         | -0.135966667 | 0.733566667  | -0.232266667 | -0.241533333 | 0.002633333  |
| ARHGAP12     | 0.113466667  | 0.281666667  | 0.396233333  | -0.043333333 | 0.1036       |
| MND1         | 0.261133333  | 0.322666667  | -0.1108      | -0.030933333 | 0.034133333  |
| LOC100131801 | 0.0392       | 0.0049       | 0.161366667  | -0.1565      | -0.101       |
| TTC39B       | 0.021833333  | 0.018166667  | 0.034466667  | -0.130166667 | -0.125333333 |
| CCDC6        | 0.0816       | 0.245133333  | 0.084433333  | -0.1188      | -0.0795      |
| LOC647030    | -0.032366667 | -0.073566667 | -0.022233333 | -0.264866667 | -0.1156      |
| PSCD2        | 0.0824       | 0.2702       | 0.304366667  | 0.090866667  | -0.056166667 |
| C11orf83     | 0.161633333  | 0.249833333  | 0.017233333  | -0.0347      | 0.069366667  |
| MYO1E        | 0.276366667  | 0.235766667  | 0.091566667  | -0.014766667 | 0.0014       |
| MAPK1        | 0.251233333  | 0.266866667  | 0.0102       | 0.0285       | 0.034366667  |
| MOBK1A       | 0.160366667  | 0.049533333  | -0.030333333 | -0.021566667 | -0.124366667 |
| SETD5        | 0.071933333  | -0.0496      | 0.043133333  | -0.174033333 | -0.191533333 |
| SLC4A11      | 0.077966667  | -0.0403      | 0.1627       | -0.204666667 | -0.046966667 |
| LOC644907    | -0.034       | 0.048166667  | 0.005566667  | -0.151833333 | -0.088866667 |
| WSB2         | -0.3249      | 0.031        | 0.1256       | -0.345866667 | 0.0261       |
| TSNAX        | -0.105733333 | -0.007333333 | 0.159366667  | -0.2455      | -0.059033333 |
| ENTPD5       | 0.070566667  | 0.064833333  | 0.0899       | -0.023233333 | -0.1961      |
| CEP350       | -0.084866667 | 0.2138       | 0.2303       | -0.064633333 | -0.1155      |
| FLJ20021     | -0.064333333 | 0.100466667  | 0.1143       | -0.227966667 | 0.010033333  |
| NEUROG2      | 0.011833333  | -0.045866667 | 0.290833333  | -0.1075      | -0.1447      |
| PXDN         | 0.222966667  | 0.095533333  | 0.209033333  | 0.047933333  | -0.0318      |
| STK19        | -0.1109      | -0.028133333 | -0.091766667 | -0.355866667 | -0.161       |
| TAPT1        | 0.039933333  | 0.113633333  | 0.120633333  | -0.151866667 | -0.099433333 |
| IDUA         | -0.096       | -0.039566667 | 0.1588       | -0.229833333 | -0.1197      |
| C22orf13     | 0.128766667  | -0.0066      | 0.082333333  | -0.139133333 | -0.1352      |
| FAM73A       | -0.038333333 | 0.988333333  | -0.1271      | -0.127666667 | 0.278833333  |
| ZFP82        | 0.2594       | 0.144666667  | -0.021       | 0.013333333  | -0.032866667 |
| HLA-DRB3     | -0.158566667 | -0.062233333 | 0.219333333  | -0.132633333 | -0.1568      |
| TNRC6A       | 0.341466667  | 0.074466667  | 0.046566667  | 0.1569       | -0.161133333 |

|              |              |              |              |              |              |
|--------------|--------------|--------------|--------------|--------------|--------------|
| PRKDC        | 0.044233333  | 0.2293       | 0.0467       | -0.217866667 | -0.048966667 |
| LOC100132547 | -0.279433333 | 0.131433333  | -0.150933333 | -0.4038      | -0.049966667 |
| APH1A        | -0.0424      | 0.16         | -0.263333333 | -0.2289      | -0.180566667 |
| SMU1         | 0.131533333  | 0.273066667  | -0.032166667 | 0.025433333  | -0.030633333 |
| NAV1         | -0.088533333 | -0.05        | 0.163933333  | -0.288133333 | -0.206233333 |
| PDXP         | 0.3829       | 0.169933333  | 0.146233333  | 0.2263       | -0.076       |
| ZCCHC14      | 0.117466667  | 0.090733333  | 0.0483       | 0.013533333  | -0.224733333 |
| TIAF1        | -0.239133333 | 0.067633333  | 0.2131       | -0.337433333 | -0.101466667 |
| LOC340260    | 0.220666667  | 0.0652       | 0.168166667  | 0.051        | -0.0372      |
| ACAT2        | 0.2185       | 0.167933333  | 0.076266667  | 0.050533333  | 0.042433333  |
| C2orf15      | -0.1429      | 0.182466667  | -0.058633333 | -0.109633333 | -0.200833333 |
| C17orf48     | -0.153333333 | -0.098066667 | 0.247366667  | -0.206633333 | -0.1803      |
| ATXN10       | -0.075       | -0.0117      | 0.122666667  | -0.133266667 | -0.2005      |
| C7orf41      | 0.037166667  | 0.1101       | -0.0413      | -0.0206      | -0.076533333 |
| GPR37        | 0.155833333  | 0.070533333  | 0.355166667  | 0.096133333  | -0.034333333 |
| LMNB2        | 0.2385       | 0.094166667  | 0.1674       | -0.003833333 | -0.1167      |
| RAB15        | 0.072033333  | 0.005066667  | 0.068366667  | -0.011133333 | -0.1818      |
| PPP1CA       | 0.2937       | 0.061866667  | 0.0955       | 0.047366667  | -0.081233333 |
| FTL          | -0.281833333 | -0.018766667 | 0.3525       | -0.414633333 | -0.044033333 |
| GLT8D1       | -0.398       | 0.156866667  | -0.066033333 | -0.440366667 | -0.165733333 |
| TTC23        | -0.0736      | -0.038333333 | 0.144233333  | -0.248666667 | -0.108733333 |
| ZSWIM6       | -0.054033333 | 0.006533333  | 0.2645       | -0.193533333 | 0.040133333  |
| SRA1         | -0.0025      | -0.032633333 | 0.0326       | -0.166633333 | -0.0958      |
| KIF22        | 0.195433333  | 0.4009       | 0.027166667  | 0.0247       | -0.078933333 |
| LOC730993    | -0.0405      | 0.810166667  | -0.095666667 | -0.1267      | 0.203        |
| MRPS16       | 0.076366667  | 0.1448       | -0.012533333 | -0.193533333 | -0.088466667 |
| PPA2         | -0.041133333 | 0.755        | 0.124633333  | -0.1016      | 0.116633333  |
| QPCTL        | 0.0214       | -0.042433333 | 0.0798       | -0.1128      | -0.1802      |
| LOC643985    | 0.028166667  | -0.0636      | -0.000433333 | -0.182166667 | -0.124       |
| LOC642989    | -0.030366667 | 0.0594       | -0.003866667 | -0.161833333 | -0.1762      |
| SAMD4B       | 0.258566667  | 0.087666667  | 0.056633333  | 0.059366667  | -0.171933333 |
| NCAM1        | 0.281866667  | 0.026866667  | 0.039933333  | -0.0809      | -0.031       |
| LEP          | -0.172733333 | 1.021766667  | -0.208366667 | -0.131133333 | 0.235333333  |
| LOC440895    | -0.007066667 | -0.012933333 | 0.1294       | -0.171533333 | -0.225966667 |
| LOC730081    | 0.0693       | 0.028266667  | 0.014533333  | -0.1762      | -0.1344      |
| TCEB2        | 0.400133333  | 0.2181       | -0.195033333 | 0.176066667  | 0.0418       |
| AIDA         | 0.117866667  | 0.0919       | 0.090566667  | -0.062       | 0.006066667  |
| LOC652826    | 0.344033333  | 0.132266667  | 0.091966667  | 0.081566667  | -0.071866667 |
| MMAB         | -0.024466667 | 0.137        | 0.024266667  | -0.197566667 | -0.075533333 |
| KCNMA1       | 0.0135       | -0.0401      | 0.1571       | -0.142333333 | -0.224033333 |
| ANKRD57      | 0.3822       | -0.005033333 | 0.193        | 0.056966667  | 0.0638       |
| PIAS1        | 0.097866667  | 0.100833333  | 0.3365       | 0.031533333  | -0.068966667 |
| KRTCAP2      | 0.099266667  | -0.0448      | 0.086166667  | -0.0545      | -0.098533333 |
| LOC440991    | 0.050933333  | 0.099933333  | -0.0067      | -0.110233333 | -0.080433333 |
| LOC389873    | 0.437033333  | 0.131466667  | -0.0311      | 0.149533333  | 0.0118       |
| LOC727984    | -0.092066667 | 0.1171       | -0.0382      | -0.120566667 | -0.1862      |
| CHD4         | -0.026033333 | 0.034633333  | 0.2853       | -0.155333333 | -0.123566667 |

|              |              |              |              |              |              |
|--------------|--------------|--------------|--------------|--------------|--------------|
| LRRC14       | -0.0502      | 0.086666667  | -0.0277      | -0.176566667 | -0.185133333 |
| ARG2         | 0.057333333  | 0.121066667  | 0.0653       | -0.195733333 | -0.038066667 |
| TFAP2A       | 0.233166667  | 0.015366667  | -0.1034      | -0.0981      | -0.026566667 |
| AMY1B        | -0.1335      | 0.516366667  | -0.532566667 | -0.3762      | 0.2652       |
| SNORA32      | 0.224166667  | 0.3965       | -0.016666667 | -0.071733333 | 0.147533333  |
| ATRN         | 0.0758       | 0.0018       | 0.0395       | -0.0446      | -0.2079      |
| LOC441242    | 0.0057       | 0.190666667  | 0.0976       | -0.022933333 | -0.133133333 |
| GNL3L        | 0.1165       | 0.128        | 0.267266667  | 0.0399       | 0.016766667  |
| KIAA1530     | 0.0854       | 0.056233333  | 0.0114       | -0.068766667 | -0.1992      |
| NIPSNAP3A    | -0.172733333 | 0.053        | 0.119666667  | -0.282433333 | -0.0346      |
| LOC728992    | -0.296733333 | 0.311566667  | -0.059133333 | -0.213633333 | -0.051433333 |
| IRAK1BP1     | -0.157133333 | -0.076366667 | 0.176733333  | -0.163333333 | -0.1962      |
| WBP11        | 0.282666667  | 0.202633333  | 0.058433333  | 0.0229       | -0.0479      |
| LOC401098    | -0.2043      | 0.848766667  | -0.024333333 | -0.223133333 | 0.175        |
| NCRNA00095   | -0.130833333 | -0.081033333 | 0.069        | -0.332533333 | -0.209566667 |
| KDM3B        | 0.040533333  | 0.1912       | 0.1366       | -0.100366667 | 0.021266667  |
| KLF13        | 0.207566667  | -0.1355      | -0.192266667 | -0.091966667 | -0.280766667 |
| SUPT6H       | 0.1173       | -0.000466667 | 0.219133333  | -0.0037      | -0.108466667 |
| ABHD15       | -0.0188      | 0.063333333  | 0.068333333  | -0.333933333 | -0.073866667 |
| ZNF470       | 0.1118       | 0.261266667  | 0.047333333  | -0.025033333 | -0.0527      |
| ZSCAN21      | 0.077066667  | 0.088133333  | 0.013866667  | -0.143233333 | -0.091966667 |
| ENSA         | 0.2433       | 0.083666667  | 0.181433333  | -0.018833333 | -0.0132      |
| SNORA3       | 0.4393       | 0.153333333  | -0.097766667 | 0.127866667  | -0.029066667 |
| MCM6         | 0.347366667  | 0.095466667  | 0.161        | 0.033566667  | -0.003966667 |
| FRYL         | -0.0227      | 0.1201       | 0.351966667  | -0.156666667 | 0.008466667  |
| TNFSF15      | -0.066233333 | 0.98         | 0.023466667  | -0.031566667 | 0.1764       |
| LOC731789    | -0.0601      | 0.552        | -0.078366667 | -0.091333333 | -0.090133333 |
| CLEC2B       | 0.258433333  | 0.0551       | 0.003433333  | -0.011433333 | 0.018166667  |
| ICMT         | 0.415966667  | 0.0207       | -0.010066667 | 0.015566667  | -0.0144      |
| HLA-F        | 0.0724       | -0.160466667 | -0.012333333 | -0.118733333 | -0.363633333 |
| FRMD5        | 0.1669       | 0.124466667  | -0.025933333 | -0.020966667 | -0.026966667 |
| MYO19        | 0.4999       | 0.2927       | 0.005333333  | 0.227933333  | -0.0602      |
| SLC35A4      | 0.157566667  | 0.0262       | 0.044833333  | -0.1015      | -0.074366667 |
| LOC100133823 | 0.252833333  | 0.2427       | 0.025666667  | 0.064466667  | 0.051033333  |
| BRMS1L       | 0.273566667  | 0.192466667  | 0.134233333  | 0.1746       | -0.0209      |
| FAM105B      | 0.433766667  | 0.1629       | -0.0298      | 0.1134       | 0.0181       |
| RPL14L       | 0.018666667  | 0.024366667  | 0.1272       | -0.063033333 | -0.1645      |
| GINS3        | 0.3431       | 0.1691       | -0.0187      | 0.0465       | -0.0786      |
| AQP12B       | 6.67E-05     | 0.144133333  | 0.1112       | -0.114933333 | -0.116533333 |
| PDK3         | 0.072333333  | 0.078666667  | 0.2164       | -0.119033333 | -0.093866667 |
| LOC441013    | -0.0412      | 0.194333333  | -0.081033333 | -0.203466667 | -0.002566667 |
| LOC732165    | -0.0781      | 0.135266667  | 0.164133333  | -0.2558      | -0.068666667 |
| EIF2S3       | -0.084133333 | -0.012533333 | 0.0748       | -0.196733333 | -0.2137      |
| GPI          | 0.076733333  | -0.1416      | 0.225        | -0.218066667 | -0.200733333 |
| RAPGEF6      | 0.194066667  | 0.0111       | 0.1397       | -0.006933333 | -0.207266667 |
| ARL6IP6      | 0.420233333  | 0.1284       | 0.093933333  | -0.031933333 | 0.039533333  |
| FKBP3        | -0.097266667 | 0.130966667  | 0.2734       | -0.086833333 | -0.120133333 |

|              |              |              |              |              |              |
|--------------|--------------|--------------|--------------|--------------|--------------|
| SNAPC3       | 0.0749       | 0.136333333  | 0.169633333  | -0.005233333 | -0.033633333 |
| RPL7A        | 0.0425       | -0.006233333 | 0.093766667  | -0.083466667 | -0.196233333 |
| PLEKHO2      | 0.161033333  | 0.116133333  | 0.113        | 0.197233333  | -0.171133333 |
| NCOA6        | 0.07         | -0.021033333 | 0.094866667  | 0.048766667  | -0.261533333 |
| LOC728843    | -0.417       | 0.2295       | -0.199133333 | -0.250366667 | -0.169933333 |
| LOC283412    | -0.089066667 | 0.0882       | 0.114333333  | -0.148633333 | -0.191266667 |
| EEF2K        | -0.128466667 | 0.0268       | 0.207133333  | -0.306133333 | -0.251833333 |
| LOC100128126 | -0.091366667 | 0.767666667  | -0.003733333 | -0.064166667 | 0.1256       |
| LOC731895    | -0.1993      | -0.003933333 | 0.232533333  | -0.335666667 | -0.098866667 |
| LOC642502    | -0.0648      | 0.015166667  | 0.0352       | -0.305533333 | -0.117233333 |
| ARF5         | -0.037966667 | -0.0676      | 0.174233333  | -0.229466667 | -0.225       |
| CHST2        | 0.1345       | 0.086133333  | 0.154033333  | -0.0521      | -0.035833333 |
| GTF3A        | 0.154666667  | 0.157533333  | 0.044533333  | -0.047866667 | 0.0217       |
| C9orf75      | 0.141333333  | 0.262266667  | 0.025933333  | 0.110266667  | -0.087733333 |
| LOC100133719 | -0.102766667 | 0.063666667  | 0.170366667  | -0.198166667 | -0.115233333 |
| TCEB1        | 0.454866667  | 0.1657       | -0.025233333 | -0.0427      | 0.1929       |
| ASAP2        | 0.353266667  | 0.247966667  | 0.055066667  | 0.059033333  | -0.0018      |
| SMARCE1      | 0.081933333  | 0.009066667  | 0.048266667  | 0.009233333  | -0.178566667 |
| GLI4         | -0.120966667 | -0.056066667 | 0.006933333  | -0.266933333 | -0.277133333 |
| AGA          | -0.165833333 | -0.146666667 | -0.031133333 | -0.276733333 | -0.279933333 |
| LOC652388    | 0.345966667  | -0.1286      | 0.0585       | -0.050666667 | -0.091766667 |
| VEZF1        | -0.192033333 | 0.063133333  | 0.2551       | -0.352866667 | -0.102       |
| MAD2L2       | 0.178633333  | 0.056133333  | 0.0943       | 0.021633333  | -0.105866667 |
| LTA4H        | -0.294066667 | 0.100533333  | 0.122066667  | -0.389633333 | -0.1019      |
| PPIL5        | 0.341066667  | 0.183733333  | -0.022533333 | 0.013466667  | -0.0929      |
| CRIP2        | -0.2573      | -0.023733333 | 0.6409       | -0.2029      | -0.1465      |
| SPIRE2       | 0.0431       | -0.0168      | 0.2466       | -0.18        | -0.0421      |
| LOC441714    | 0.3969       | 0.1895       | 0.080133333  | 0.163766667  | 0.0606       |
| RTN2         | 0.005433333  | -0.041133333 | 0.295166667  | -0.1749      | -0.171966667 |
| DHX9         | 0.554633333  | 0.3238       | -0.102733333 | 0.225666667  | 0.0179       |
| LOC648659    | -0.5282      | 0.372233333  | -0.394833333 | -0.565633333 | 0.021766667  |
| LOC642661    | 0.3422       | 0.2531       | 0.084933333  | 0.169966667  | 0.024133333  |
| TLN1         | 0.043666667  | -0.0202      | 0.226666667  | -0.117366667 | -0.1238      |
| ELP4         | 0.017533333  | 0.1147       | 0.0974       | -0.098466667 | -0.114833333 |
| MTMR3        | 0.1464       | 0.009366667  | 0.0132       | -0.1061      | -0.0907      |
| LOC643872    | 0.0415       | 0.413366667  | -0.209066667 | -0.247533333 | 0.2124       |
| HINFP        | -0.021666667 | -0.021866667 | 0.1294       | -0.1488      | -0.178533333 |
| ACOX3        | -0.1301      | 0.179266667  | 0.132933333  | -0.213133333 | -0.022233333 |
| NHLRC2       | 0.3911       | 0.181        | 0.0697       | 0.133233333  | -0.015066667 |
| PARK7        | 0.059566667  | 0.0432       | 0.048666667  | -0.1386      | -0.0917      |
| KIF5C        | 0.3969       | 0.119433333  | 0.059133333  | 0.078366667  | 0.020766667  |
| PDPR         | -0.018666667 | 0.097366667  | -0.030133333 | -0.220866667 | -0.1831      |
| PTPLA        | -0.293066667 | -0.0586      | 0.205566667  | -0.386333333 | -0.181566667 |
| C19orf51     | -0.1757      | 0.1841       | 0.286466667  | -0.242       | 0.003866667  |
| HNRPA1L-2    | 0.247533333  | 0.198466667  | -0.0336      | 0.0358       | -0.1293      |
| SNX27        | 0.0121       | 0.029666667  | 0.174466667  | -0.341733333 | 0.017733333  |
| COG4         | -0.009133333 | -0.014133333 | 0.183633333  | -0.131333333 | -0.193266667 |

|              |              |              |              |              |              |
|--------------|--------------|--------------|--------------|--------------|--------------|
| EVL          | -0.0397      | -0.0013      | 0.186766667  | -0.307       | -0.165833333 |
| GAS8         | -0.0126      | 0.0293       | 0.188733333  | -0.1944      | -0.1053      |
| CDCA3        | 0.155        | 0.265033333  | 0.061166667  | 0.143433333  | -0.084333333 |
| BAT2         | 0.2357       | 0.072533333  | 0.155333333  | -0.015933333 | -0.049033333 |
| C6orf173     | 0.3772       | 0.3894       | -0.073066667 | 0.109666667  | 0.125266667  |
| SEPSECS      | -0.052366667 | 0.081266667  | 0.0409       | -0.225266667 | -0.1621      |
| HSPC157      | -0.059033333 | 0.080833333  | -0.024666667 | -0.230466667 | -0.212133333 |
| AES          | 0.0258       | 0.006233333  | 0.4221       | -0.092433333 | -0.073633333 |
| ZFHX4        | -0.056866667 | 0.025166667  | 0.105766667  | -0.1844      | -0.2205      |
| SH3RF3       | 0.2929       | 0.098666667  | 0.0277       | -0.0677      | -0.1053      |
| RPL22        | -0.259466667 | -0.0698      | 0.1146       | -0.273366667 | -0.306133333 |
| PAC3IN3      | 0.0705       | 0.034533333  | 0.359066667  | -0.0654      | 0.007633333  |
| NPHP1        | -0.0193      | 0.285533333  | 0.291666667  | -0.0698      | 0.133033333  |
| SPN          | -0.148866667 | 0.6728       | -0.045466667 | -0.1314      | 0.1733       |
| APP          | 0.235933333  | -0.165533333 | 0.134166667  | -0.146       | -0.153366667 |
| KLHDC8B      | -0.3094      | 0.050533333  | 0.175566667  | -0.415933333 | -0.155166667 |
| ZDHHC20      | 0.0941       | 0.1267       | 0.286333333  | -0.076333333 | 0.0916       |
| CCDC117      | 0.336266667  | 0.113833333  | 0.185066667  | 0.077066667  | -0.006666667 |
| PIGW         | 0.756033333  | 0.250433333  | -0.098566667 | 0.320033333  | 0.152        |
| LOC100129650 | 0.190366667  | 0.1297       | -0.015766667 | -0.0772      | 0.007366667  |
| UBE1         | 0.018233333  | -0.038233333 | 0.143066667  | -0.1743      | -0.1727      |
| RAC3         | 0.0013       | 0.191666667  | 0.2363       | 0.021866667  | -0.031333333 |
| LOC389156    | -0.0696      | 0.127833333  | 0.000266667  | -0.195433333 | 0.003666667  |
| PRRT2        | -0.093566667 | 0.2067       | 0.318966667  | -0.1053      | -0.078366667 |
| LOC644642    | -0.142933333 | 0.7916       | -0.3478      | -0.263733333 | 0.195866667  |
| ALDH18A1     | 0.177466667  | 0.101266667  | 0.191266667  | -0.047533333 | -0.102833333 |
| LOC644634    | 0.028033333  | 0.143933333  | 0.176133333  | 0.184433333  | -0.201433333 |
| LOC729222    | -0.435066667 | -0.1957      | 0.587366667  | -0.534566667 | -0.291266667 |
| PAPSS2       | -0.274166667 | -0.126066667 | 0.440366667  | -0.338566667 | -0.133633333 |
| PTPRK        | -0.008433333 | 0.0173       | 0.076033333  | -0.118833333 | -0.078       |
| TUBB4        | -0.0758      | -0.121966667 | 0.2894       | -0.354033333 | -0.0828      |
| CACNB3       | -0.041566667 | 0.009766667  | 0.244533333  | -0.274866667 | -0.127366667 |
| HCFC1R1      | -0.434633333 | -0.070833333 | 0.629733333  | -0.332433333 | -0.160733333 |
| TNRC15       | 0.148533333  | 0.1198       | 0.015366667  | -0.066033333 | -0.083633333 |
| MGC61598     | -0.055866667 | 0.158266667  | -0.006       | -0.243866667 | 0.100166667  |
| ERCC1        | 0.1301       | -0.059566667 | 0.518633333  | -0.185033333 | 0.006633333  |
| MADD         | 0.074433333  | -0.01        | 0.087        | -0.1327      | -0.1998      |
| DYRK2        | 0.335466667  | -0.134233333 | 0.194533333  | 0.0841       | -0.087533333 |
| PEX7         | 0.047066667  | 0.1093       | 0.017566667  | -0.1108      | -0.150333333 |
| SNHG8        | -0.2499      | 0.155033333  | -0.207366667 | -0.547733333 | -0.0513      |
| LOC644928    | 0.0508       | 0.162666667  | 0.030333333  | -0.048966667 | -0.0178      |
| ATP5L        | 0.029733333  | -0.075566667 | 0.036466667  | -0.128366667 | -0.076266667 |
| ASXL2        | 0.1304       | 0.026033333  | 0.038866667  | -0.1733      | -0.223133333 |
| SNORD65      | 0.217433333  | 0.306833333  | 0.074633333  | -0.012666667 | 0.045        |
| IQGAP1       | -0.148666667 | 0.124033333  | 0.179933333  | -0.278533333 | -0.084033333 |
| LOC100129650 | 0.2257       | -0.134133333 | -0.106566667 | -0.0418      | -0.304866667 |
| IDI1         | 0.137866667  | 0.111233333  | 0.076866667  | -0.0415      | -0.019933333 |



|              |              |              |              |              |              |
|--------------|--------------|--------------|--------------|--------------|--------------|
| CYP27C1      | 0.362033333  | 0.1492       | 0.057266667  | 0.0091       | -0.0928      |
| ZYG11B       | -0.1564      | -0.000866667 | 0.242066667  | -0.249133333 | -0.0999      |
| PCMT1        | 0.037466667  | 0.055666667  | 0.046733333  | -0.0643      | -0.083       |
| BAX          | 0.3306       | 0.074466667  | -0.0961      | -0.186033333 | 0.112033333  |
| LOC440595    | -0.754       | 0.2314       | -0.504533333 | -0.735666667 | -0.117533333 |
| SEMA6A       | 0.178533333  | 0.048266667  | 0.202066667  | 0.064933333  | -0.0791      |
| MGC39900     | 0.212133333  | 0.088233333  | 0.123066667  | -0.028733333 | -0.048633333 |
| SNX26        | 0.3902       | 0.033333333  | 0.0599       | -0.047466667 | -0.032833333 |
| PITPNM1      | -0.160333333 | -0.058966667 | 0.377433333  | -0.2771      | -0.2516      |
| LOC731950    | 0.1047       | 0.032166667  | 0.046166667  | -0.132866667 | -0.1543      |
| LOC727821    | -0.3897      | 0.273333333  | -0.405966667 | -0.483666667 | 0.0927       |
| PSMF1        | 0.077333333  | 0.0301       | -0.054       | -0.026833333 | -0.172433333 |
| ZNF629       | 0.197766667  | -0.1145      | -0.037033333 | -0.052366667 | -0.334733333 |
| IGFBP3       | 0.378666667  | -0.255966667 | 0.124266667  | 0.172933333  | -0.2022      |
| FOXRED2      | -0.002166667 | 0.150833333  | 0.127433333  | -0.2517      | -0.04        |
| BCKDHB       | -0.104633333 | 0.021666667  | 0.108466667  | -0.252866667 | -0.079766667 |
| CLEC11A      | 0.036966667  | -0.005966667 | 0.097        | -0.146033333 | -0.121633333 |
| MIB2         | 0.107266667  | 0.0058       | 0.0866       | -0.230033333 | -0.064566667 |
| FAIM3        | 0.1306       | -0.009066667 | -0.144766667 | -0.229766667 | -0.1578      |
| ZNF384       | 0.105933333  | 0.1525       | 0.129633333  | 0.067366667  | -0.1692      |
| LOC100133185 | 0.133833333  | 0.054766667  | 0.119533333  | -0.057566667 | -0.0711      |
| LOC644237    | -0.218566667 | 0.048233333  | 0.337366667  | -0.271833333 | -0.233166667 |
| LAPTM4B      | 0.164266667  | 0.033333333  | 0.153833333  | -0.059866667 | -0.1326      |
| NHP2         | 0.147933333  | 0.183        | 0.190766667  | 0.075666667  | -0.029766667 |
| ANKS1A       | -0.037033333 | 0.079266667  | 0.189766667  | -0.2301      | -0.109933333 |
| PIF1         | 0.089766667  | 0.137233333  | 0.130133333  | -0.048366667 | 0.071933333  |
| COMMD1       | -0.046466667 | 0.0262       | 0.1718       | -0.259266667 | -0.119533333 |
| ATPAF1       | -0.003366667 | 0.086466667  | 0.059766667  | -0.151766667 | -0.0757      |
| MRPL51       | 0.109033333  | 0.153033333  | 0.073966667  | -0.1377      | 0.035033333  |
| KIAA0182     | -0.239066667 | 0.001466667  | 0.084566667  | -0.367933333 | -0.220866667 |
| LOC387753    | -0.0721      | 0.2582       | -0.179633333 | -0.246333333 | -0.0236      |
| LANCL2       | 0.3335       | 0.0664       | -0.232066667 | 0.112466667  | -0.220433333 |
| COQ2         | 0.339666667  | 0.284266667  | -0.0431      | 0.072866667  | 0.014933333  |
| HNRNPUL2     | 0.171866667  | -0.071433333 | 0.130266667  | -0.026566667 | -0.301666667 |
| TMEM170B     | -0.0195      | -0.0073      | 0.093966667  | -0.22        | -0.036833333 |
| MIR761       | 0.261033333  | 0.264633333  | 0.078133333  | 0.112566667  | -0.118766667 |
| LOC100132289 | 0.413833333  | 0.242266667  | 0.086833333  | 0.135566667  | 0.034766667  |
| BAT5         | -0.013       | 0.0206       | 0.139766667  | -0.037566667 | -0.193066667 |
| C11orf73     | -0.391566667 | 0.331166667  | -0.0232      | -0.364033333 | -0.023633333 |
| LOC100133542 | 0.4359       | 0.0789       | 0.0217       | 0.0813       | -0.0559      |
| LOC729769    | 0.037533333  | 0.0423       | 0.109333333  | -0.0412      | -0.1746      |
| C9orf7       | 0.021766667  | 0.0031       | 0.1545       | -0.079433333 | -0.121366667 |
| C14orf104    | 0.256966667  | 0.204433333  | 0.218033333  | 0.088233333  | 0.010233333  |
| PEX1         | -0.099133333 | 0.1351       | 0.1746       | -0.146933333 | -0.173233333 |
| TTC31        | 0.1377       | 0.074666667  | -0.054833333 | -0.180633333 | -0.092866667 |
| GAS1         | 0.0364       | -0.112833333 | 0.018133333  | -0.1496      | -0.1819      |
| METRNL       | -0.124333333 | -0.139033333 | 0.487966667  | -0.136166667 | -0.120333333 |

|              |              |              |              |              |              |
|--------------|--------------|--------------|--------------|--------------|--------------|
| NDUFB11      | -0.1193      | 0.044666667  | 0.2857       | -0.199866667 | -0.145766667 |
| EFNA4        | 0.103966667  | 0.015833333  | 0.1207       | -0.1747      | -0.0901      |
| TULP3        | -0.027133333 | -0.052466667 | 0.1792       | -0.17        | -0.135533333 |
| ARHGEF12     | 0.045333333  | 0.050366667  | 0.074633333  | -0.0746      | -0.0493      |
| LOC100133058 | -0.125966667 | 0.126333333  | 0.100566667  | -0.112233333 | -0.114533333 |
| H3F3A        | 0.1321       | 0.0124       | 0.217233333  | -0.048066667 | -0.119233333 |
| SLC10A3      | 0.559366667  | 0.0725       | -0.066066667 | 0.167466667  | -0.030033333 |
| HMG2         | 0.524666667  | 0.304466667  | -0.1454      | 0.2503       | 0.0326       |
| C17orf85     | 0.272266667  | 0.281        | 0.017433333  | 0.1216       | -0.062866667 |
| SGSM2        | -0.059433333 | -0.087366667 | 0.220333333  | -0.228133333 | -0.1072      |
| IMP3         | 0.471066667  | 0.248433333  | 0.102133333  | 0.232466667  | -0.019466667 |
| SEC16A       | -0.004133333 | -0.0264      | 0.183933333  | -0.218333333 | -0.166866667 |
| FBXO27       | 0.1996       | -0.001766667 | 0.261566667  | 0.063133333  | -0.1281      |
| ZNF383       | -0.027233333 | 0.225366667  | 0.066033333  | -0.1982      | -0.048133333 |
| LOC649445    | 0.0739       | 0.318266667  | -0.0507      | -0.107033333 | 0.0173       |
| CDC2L6       | -0.401066667 | 0.0189       | 0.327166667  | -0.392333333 | -0.1919      |
| ZNF444       | 0.138933333  | 0.1348       | 0.119233333  | -0.094566667 | -0.1309      |
| SOX18        | 0.213933333  | 0.1096       | 0.377133333  | 0.009833333  | -0.098       |
| PTGFRN       | 0.252733333  | -0.017266667 | 0.164        | -0.050966667 | -0.106466667 |
| MTHFS        | 0.134        | -0.012433333 | 0.014266667  | -0.131066667 | -0.243366667 |
| NECAP2       | 0.096966667  | 0.0319       | 0.1586       | -0.1458      | -0.105266667 |
| HISPPD2A     | -0.039466667 | 0.0815       | -0.041266667 | -0.216166667 | -0.185633333 |
| CNPY4        | -0.2026      | 0.038866667  | 0.134066667  | -0.3407      | -0.182       |
| ERGIC3       | -0.129233333 | -0.123533333 | 0.3326       | -0.256466667 | -0.156066667 |
| C9orf93      | 0.021233333  | 0.083333333  | -0.042166667 | -0.2326      | -0.149566667 |
| MTMR6        | 0.1349       | 0.1251       | 0.0531       | -0.0419      | 0.0073       |
| C11orf41     | 0.006933333  | 0.116666667  | 0.147366667  | -0.228333333 | -0.094766667 |
| ZNF217       | 0.088033333  | 0.101933333  | 0.198533333  | 0.028966667  | -0.0632      |
| FAM153B      | -0.0676      | 0.5849       | -0.180766667 | -0.227       | 0.058266667  |
| PRDM8        | 0.176        | 0.2886       | 0.380666667  | 0.052466667  | 0.097266667  |
| LOC100134239 | 0.057433333  | 0.013033333  | 0.156666667  | -0.083233333 | -0.1021      |
| SLC39A6      | 0.2338       | 0.080133333  | 0.1286       | 0.045866667  | -0.0339      |
| PPM1B        | 0.177433333  | 0.085533333  | 0.228133333  | 0.0204       | 0.0414       |
| CHST7        | 0.0383       | 0.038233333  | 0.386966667  | -0.2347      | -0.0335      |
| XAGE1B       | -0.026233333 | 0.010066667  | 0.077533333  | -0.2959      | -0.2859      |
| GPR3         | 0.732433333  | 0.223233333  | 0.025233333  | 0.327033333  | 0.019933333  |
| LOC401640    | -0.142266667 | 0.244733333  | -0.021233333 | -0.173266667 | -0.170366667 |
| TPCN2        | 0.200266667  | -0.0066      | 0.1285       | -0.1055      | -0.0419      |
| NDUFA7       | -0.198166667 | 0.0339       | 0.183066667  | -0.3739      | -0.161066667 |
| PPFIBP1      | -0.439633333 | -0.076366667 | 0.684266667  | -0.465066667 | -0.290733333 |
| PSME3        | 0.438366667  | 0.314433333  | -0.068633333 | 0.2525       | -0.018       |
| SUPT16H      | 0.295333333  | 0.1708       | 0.0801       | 0.052866667  | -0.0618      |
| CASC4        | 0.047433333  | 0.035966667  | 0.083433333  | -0.2259      | -0.129333333 |
| CREBBP       | -0.105166667 | 0.044866667  | 0.054533333  | -0.1409      | -0.172666667 |
| COG8         | 0.1795       | 0.1472       | -0.126833333 | -0.150033333 | -0.1231      |
| LOC441550    | -0.4289      | 0.2614       | -0.309933333 | -0.4145      | -0.248566667 |
| FAM102B      | 0.219133333  | 0.006633333  | 0.009066667  | -0.019366667 | -0.086233333 |

|              |              |              |              |              |              |
|--------------|--------------|--------------|--------------|--------------|--------------|
| TMX4         | 0.303133333  | 0.334033333  | 0.306        | 0.184933333  | -0.005933333 |
| HCG3         | -0.021666667 | 0.051966667  | 0.072233333  | -0.193033333 | -0.316       |
| SAC3D1       | 0.385266667  | 0.106033333  | 0.021566667  | 0.2505       | -0.214333333 |
| SMARCB1      | 0.138        | 0.250633333  | 0.018933333  | 0.005933333  | -0.0334      |
| C7orf59      | 0.0043       | -0.0949      | 0.236733333  | -0.195466667 | -0.137433333 |
| MAT2B        | -0.018833333 | 0.047166667  | 0.119166667  | -0.242033333 | -0.158666667 |
| PLP2         | 0.508333333  | 0.039866667  | 0.042333333  | 0.204866667  | 0.025133333  |
| CAMK2D       | -0.103766667 | -0.0729      | 0.1348       | -0.234666667 | -0.198933333 |
| EIF2S2       | -0.0151      | 0.104133333  | 0.005033333  | -0.2334      | -0.0649      |
| LRCH2        | -0.013833333 | 0.101166667  | 0.190633333  | -0.1899      | -0.1617      |
| SMA4         | -0.023833333 | 0.074333333  | 0.127733333  | -0.121733333 | -0.230766667 |
| LOC645173    | 0.047766667  | 0.038466667  | 0.103        | -0.0847      | -0.115166667 |
| MYD88        | 0.0656       | 0.027033333  | 0.0932       | -0.120433333 | -0.153033333 |
| HNRPC        | -0.011266667 | 0.2347       | 0.033966667  | -0.156       | -0.055233333 |
| CHN1         | 0.181933333  | 0.0131       | 0.1333       | 0.0214       | -0.141       |
| SLC12A9      | 0.199666667  | -0.030033333 | 0.154933333  | -0.126033333 | 0.009033333  |
| TP53RK       | 0.1793       | -0.050366667 | 0.217166667  | 0.0517       | -0.170266667 |
| LOC723972    | 0.248533333  | 0.0915       | 0.210433333  | -0.048866667 | 0.093433333  |
| TESK2        | 0.007666667  | -0.077466667 | 0.024866667  | -0.165933333 | -0.233033333 |
| LOC651319    | -0.055533333 | 0.066966667  | 0.300466667  | -0.168366667 | -0.0517      |
| XRN2         | 0.268733333  | 0.1845       | 0.119933333  | 0.0438       | 0.031466667  |
| LOC642017    | 0.144633333  | 0.223666667  | -0.003066667 | -0.092666667 | -0.163566667 |
| TMEM217      | 0.157233333  | 0.0605       | 0.189266667  | -0.0989      | -0.053833333 |
| STK36        | 0.056433333  | -0.0208      | 0.112133333  | -0.2104      | -0.1274      |
| RIF1         | 0.326433333  | 0.152266667  | 0.1569       | 0.107833333  | -0.032366667 |
| SH3PXD2A     | 0.0283       | 0.055133333  | 0.228133333  | -0.350333333 | -0.1172      |
| SLC4A5       | -0.0894      | 0.751233333  | -0.065966667 | -0.1692      | 0.0985       |
| LOC646753    | 0.145133333  | 0.119933333  | 0.0813       | 0.006833333  | -0.0208      |
| EWSR1        | 0.475433333  | 0.176766667  | -0.047333333 | 0.1373       | -0.009666667 |
| INTS3        | -0.029533333 | 0.1565       | 0.038533333  | -0.271533333 | -0.1645      |
| ERLIN2       | 0.222533333  | -0.177066667 | -0.015033333 | -0.098233333 | -0.172666667 |
| SLC2A6       | -0.211566667 | 0.000533333  | 0.499933333  | -0.245133333 | 0.004066667  |
| LOC100133756 | 0.447833333  | 0.014833333  | -0.077466667 | -0.0264      | -0.170033333 |
| IARS2        | 0.047333333  | 0.1133       | 0.155666667  | -0.1459      | -0.057966667 |
| CNPY2        | -0.0914      | -0.017566667 | 0.1253       | -0.247166667 | -0.1605      |
| IFT81        | 0.0287       | 0.102866667  | 0.111633333  | -0.157066667 | -0.0982      |
| B3GNT6       | -0.021266667 | -0.0168      | 0.3098       | -0.2278      | -0.168533333 |
| TUFM         | -0.0573      | 0.068966667  | 0.210566667  | -0.090366667 | -0.164166667 |
| WNK1         | 0.021966667  | 0.066466667  | 0.262433333  | -0.1756      | -0.1717      |
| TP53BP2      | 0.219266667  | 0.087933333  | 0.0373       | 0.153266667  | -0.137033333 |
| LOC145853    | 0.529        | 0.141433333  | -0.1478      | 0.059166667  | -0.005966667 |
| PSMA2        | 0.175633333  | 0.2815       | 0.063366667  | 0.025366667  | 0.016433333  |
| ADIPOR1      | 0.149933333  | 0.149366667  | 0.036666667  | -0.0565      | -0.1564      |
| FBXO17       | -0.021233333 | 0.0861       | 0.299833333  | -0.241333333 | -0.023266667 |
| BMP2K        | 0.430733333  | 0.148633333  | -0.068433333 | 0.067666667  | -0.075833333 |
| RAB11FIP3    | 0.1464       | 0.089966667  | -0.001966667 | -0.056733333 | -0.148133333 |
| SELS         | 0.3334       | 0.098366667  | 0.1765       | 0.099266667  | -0.063233333 |

|              |              |              |              |              |              |
|--------------|--------------|--------------|--------------|--------------|--------------|
| HRASLS3      | -0.2144      | 0.124766667  | 0.2462       | -0.319       | -0.035133333 |
| C2orf64      | -0.239       | -0.024866667 | -0.0453      | -0.392433333 | -0.234766667 |
| ARRDC2       | 0.3759       | 0.2478       | 0.150633333  | 0.2743       | -0.120666667 |
| KLHL7        | 0.090333333  | -0.064666667 | 0.050166667  | -0.151266667 | -0.181066667 |
| CSPP1        | 0.192733333  | 0.1794       | 0.269866667  | 0.031366667  | -0.010166667 |
| GBP1         | -0.1837      | -0.043366667 | 0.3443       | -0.2148      | -0.1412      |
| LOC643433    | -0.022533333 | 0.135066667  | 0.115866667  | -0.160433333 | -0.179266667 |
| SEC61A2      | -0.020166667 | 0.051866667  | 0.173666667  | -0.1686      | -0.1665      |
| GDAP2        | 0.317266667  | 0.207966667  | -0.023166667 | 0.025766667  | -0.000866667 |
| RPLP1        | -0.4271      | 0.201133333  | -0.089433333 | -0.483833333 | -0.1175      |
| H2AFJ        | -0.2241      | 0.0914       | 0.460466667  | -0.195766667 | -0.082433333 |
| FBXO2        | -0.007833333 | 0.0199       | 0.248233333  | -0.007433333 | -0.168233333 |
| TMEM20       | 0.536266667  | 0.1285       | 0.236933333  | 0.165133333  | 0.122933333  |
| NFIB         | 0.3075       | 0.053        | 0.1249       | 0.115666667  | -0.2113      |
| ATXN7L3      | 0.1415       | 0.076366667  | -0.016       | -0.144766667 | -0.167233333 |
| ZNF526       | 0.200633333  | 0.214766667  | 0.161433333  | 0.009366667  | -0.076466667 |
| TCEAL4       | -0.0688      | 0.005133333  | 0.123533333  | -0.164566667 | -0.274633333 |
| GNA13        | -0.0571      | -0.1305      | 0.0093       | -0.3372      | 0.067733333  |
| PRR3         | 0.373066667  | 0.139533333  | 0.105666667  | 0.166366667  | -0.0509      |
| RPA3         | 0.154466667  | 0.128966667  | 0.1139       | -0.064366667 | -0.076966667 |
| LOC100132037 | -0.040466667 | 0.119833333  | 0.049433333  | -0.185266667 | -0.1387      |
| ZADH2        | 0.116933333  | -0.0529      | 0.3233       | -0.105266667 | -0.069133333 |
| DCTN1        | -0.021033333 | 0.0345       | 0.2443       | -0.160533333 | -0.144966667 |
| LOC100131866 | -0.229133333 | 0.153666667  | -0.034933333 | -0.276366667 | -0.102833333 |
| NACC1        | 0.373233333  | 0.110033333  | 0.1691       | 0.1402       | -0.048033333 |
| LOC644937    | -0.397233333 | 0.1595       | -0.148433333 | -0.4293      | -0.1791      |
| EMP1         | 0.394433333  | 0.281133333  | 0.339466667  | 0.164833333  | 0.0963       |
| LOC642197    | -0.079433333 | 0.209266667  | 0.1706       | -0.254166667 | -0.0807      |
| RNF144A      | 0.0372       | -0.0273      | 0.2389       | -0.318833333 | -0.111533333 |
| WDR40A       | 0.180766667  | 0.0665       | 0.0348       | 0.0275       | -0.210766667 |
| EEF1B2       | 0.233833333  | 0.092833333  | 0.1192       | 0.0647       | -0.0469      |
| ZNF260       | 0.167066667  | -0.035733333 | 0.229633333  | -0.041533333 | -0.134666667 |
| UFSP1        | 0.210266667  | 0.141233333  | 0.008466667  | -0.079933333 | -0.028866667 |
| ZNF543       | 0.205466667  | 0.000666667  | 0.047433333  | -0.1446      | -0.118966667 |
| MTR          | 0.156966667  | 0.081633333  | 0.009266667  | 0.006733333  | -0.2086      |
| C20orf52     | -0.0068      | -0.032233333 | 0.2925       | -0.185633333 | -0.164066667 |
| FANCD2       | 0.283033333  | 0.2382       | 0.126166667  | -0.0592      | 0.034533333  |
| GNAI2        | 0.0168       | 0.0026       | 0.3218       | -0.134533333 | -0.096266667 |
| PGLS         | -0.1059      | -0.0781      | 0.244266667  | -0.2323      | -0.259666667 |
| DNAJC12      | -0.242466667 | 0.018        | 0.248        | -0.499066667 | -0.0699      |
| STOML2       | 0.1392       | 0.042866667  | 0.162733333  | -0.071966667 | -0.127533333 |
| CYP27A1      | -0.0073      | -0.003666667 | 0.153        | -0.210633333 | -0.140666667 |
| MUT          | -0.1624      | 0.086366667  | 0.283733333  | -0.2088      | -0.029666667 |
| BTD          | 0.2475       | 0.065966667  | 0.178233333  | 0.1264       | -0.1988      |
| MLL          | 0.2667       | 0.1249       | 0.1405       | -0.068966667 | -0.094466667 |
| RCN3         | -0.0116      | 0.2519       | 0.169433333  | -0.131033333 | -0.083333333 |
| RNU6-1       | 0.0145       | 0.2106       | 0.3685       | -0.023866667 | -0.008733333 |

|              |              |              |              |              |              |
|--------------|--------------|--------------|--------------|--------------|--------------|
| USP21        | -0.075133333 | 0.080766667  | 0.120633333  | -0.317266667 | -0.062066667 |
| LOC728467    | 0.2057       | 0.275166667  | 0.063666667  | -0.103233333 | -0.016       |
| LOC100128460 | -0.201133333 | 0.896966667  | -0.330333333 | -0.3448      | 0.2328       |
| PLK2         | 0.357166667  | 0.0948       | -0.410633333 | 0.229433333  | -0.323233333 |
| CDS2         | 0.075166667  | 0.126833333  | 0.175166667  | -0.106       | -0.1132      |
| GDF11        | 0.042666667  | -0.016966667 | 0.355933333  | -0.139266667 | -0.1253      |
| ZNF544       | 0.3558       | 0.144233333  | 0.078266667  | -0.075533333 | -0.058566667 |
| CPT1A        | -0.022333333 | 0.066566667  | 0.208833333  | -0.134733333 | -0.129233333 |
| NCOA5        | 0.383733333  | 0.136233333  | 0.072866667  | 0.063566667  | -0.0874      |
| CYCSL1       | -0.159       | 0.968466667  | -0.1681      | -0.187333333 | 0.216566667  |
| TAGLN2       | 0.6322       | -0.024133333 | 0.282966667  | 0.386933333  | -0.066866667 |
| EMB          | 0.062        | 0.075933333  | 0.086966667  | -0.083866667 | -0.081466667 |
| C21orf119    | 0.1574       | 0.0317       | -0.040733333 | -0.142166667 | -0.0913      |
| CTHRC1       | -0.342133333 | 0.065566667  | 0.699        | -0.2701      | -0.145266667 |
| LOC648921    | -0.251033333 | 0.831133333  | -0.257066667 | -0.2938      | 0.046333333  |
| LOC646278    | 0.240233333  | 0.234033333  | 0.122533333  | 0.006533333  | 0.001166667  |
| C7orf70      | 0.0429       | -0.0433      | 0.0611       | -0.1406      | -0.1561      |
| NUDT3        | 0.1821       | 0.086566667  | 0.181966667  | -0.059866667 | -0.0717      |
| NUDT6        | -0.128666667 | 0.178033333  | 0.055733333  | -0.311266667 | -0.061533333 |
| C6orf204     | -0.151966667 | 0.127066667  | 0.3707       | -0.204566667 | -0.113966667 |
| VASP         | 0.221433333  | 0.157533333  | 0.220033333  | 0.050166667  | -0.103       |
| PCDHGB6      | 0.176933333  | -0.0705      | 0.138433333  | 0.0227       | -0.229633333 |
| CLN6         | 0.365066667  | 0.0876       | 0.124033333  | 0.184766667  | -0.1517      |
| RPL8         | 0.083        | 0.013433333  | 0.284        | -0.0023      | -0.1027      |
| ENDOG        | 0.1667       | 0.015633333  | 0.156133333  | -0.0848      | -0.117166667 |
| RNF144       | 0.052433333  | -0.060366667 | 0.216266667  | -0.2786      | -0.112166667 |
| ZNF558       | -0.056833333 | 0.044766667  | 0.013966667  | -0.1994      | -0.169233333 |
| POLR2J4      | -0.038366667 | 0.609833333  | -0.0718      | -0.1605      | 0.119766667  |
| FNTA         | -0.030566667 | 0.087        | 0.1637       | -0.2679      | -0.1356      |
| CCNE1        | 0.645733333  | 0.188733333  | 0.1429       | 0.354866667  | -0.013366667 |
| ZNF364       | 0.129633333  | -0.111533333 | 0.1767       | -0.089133333 | -0.1267      |
| CXCL2        | -0.305233333 | -0.164766667 | 0.286033333  | -0.223933333 | -0.366166667 |
| VPS45        | 0.059333333  | -0.0186      | -0.044366667 | -0.186566667 | -0.2628      |
| LOC646785    | -0.2271      | 0.250866667  | -0.217       | -0.322566667 | -0.060666667 |
| TMBIM4       | -0.065633333 | 0.002933333  | 0.1284       | -0.2517      | -0.182533333 |
| VHL          | -0.374233333 | 0.099133333  | 0.0634       | -0.2631      | -0.346333333 |
| LOC729776    | -0.015033333 | 0.148066667  | 0.018166667  | -0.229333333 | -0.1426      |
| PGP          | 0.214333333  | 0.099733333  | 0.118        | 0.097833333  | -0.078633333 |
| ADI1         | -0.1222      | 0.375        | -0.215766667 | -0.3221      | 0.018533333  |
| DEPDC6       | -0.079366667 | -0.045533333 | 0.435966667  | -0.1437      | -0.0664      |
| CTSL2        | 0.126266667  | 0.0747       | 0.071966667  | -0.235833333 | -0.119       |
| C19orf30     | 0.0508       | 0.292233333  | 0.000333333  | -0.179033333 | 0.043266667  |
| LOC100129297 | -0.030066667 | 0.1469       | 0.2432       | -0.084933333 | -0.183633333 |
| LOC644760    | -0.035       | 0.253233333  | 0.020833333  | -0.213766667 | -0.140233333 |
| LOC401622    | 0.0115       | 0.358133333  | 0.114266667  | -0.0694      | -0.044666667 |
| PTPLAD2      | -0.172166667 | 0.744333333  | -0.283733333 | -0.2469      | 0.0766       |
| HIST2H2AC    | 0.196666667  | 0.068        | 0.1484       | -0.0103      | -0.167233333 |

|           |              |              |              |              |              |
|-----------|--------------|--------------|--------------|--------------|--------------|
| LOC391825 | -0.2591      | 0.339966667  | -0.0354      | -0.230233333 | 0.0127       |
| CEP110    | 0.150133333  | 0.153833333  | 0.417766667  | 0.048666667  | -0.007066667 |
| TIA1      | 0.0239       | -0.008166667 | 0.2363       | -0.1786      | -0.1149      |
| TNFSF14   | -0.051833333 | 0.738633333  | -0.074966667 | -0.1551      | 0.111866667  |
| CYBASC3   | 0.118566667  | 0.088866667  | 0.095366667  | -0.1584      | -0.1546      |
| TIGD7     | -0.014166667 | -0.052533333 | 0.0063       | -0.378033333 | -0.063266667 |
| LYPD1     | 0.4604       | 0.342333333  | -0.364566667 | -0.1689      | -0.008866667 |
| KIAA1324L | -0.1087      | -0.0015      | 0.1744       | -0.2449      | -0.141166667 |
| PTBP2     | 0.0386       | 0.2251       | 0.199266667  | 0.0503       | -0.1207      |
| H2AFY     | -0.019166667 | -0.0623      | 0.3          | -0.1556      | -0.227566667 |
| LOC644852 | -0.045766667 | 0.900833333  | -0.1208      | -0.1501      | 0.140833333  |
| YWHAG     | 0.1793       | 0.0485       | 0.097933333  | 0.0415       | -0.069766667 |
| DEPDC5    | -0.0824      | 0.2947       | 0.0358       | -0.180466667 | -0.086066667 |
| EMILIN2   | 0.218166667  | 0.093966667  | -0.073033333 | -0.0727      | -0.1444      |
| ACP6      | -0.1325      | 0.2073       | 0.2929       | -0.181866667 | -0.106666667 |
| ZNF331    | 0.235866667  | 0.1338       | 0.030833333  | -0.075233333 | -0.151766667 |
| ATP6V0A2  | 0.225433333  | 0.1503       | -0.0547      | -0.071033333 | -0.0765      |
| EML2      | 0.024133333  | 0.0169       | 0.169433333  | -0.218766667 | -0.1019      |
| PIGK      | 0.108166667  | 0.136266667  | 0.0494       | -0.0961      | -0.1016      |
| FLNB      | 0.025666667  | -0.0552      | 0.121033333  | -0.179733333 | -0.245433333 |
| BIN1      | 0.0071       | 0.158133333  | 0.1278       | -0.100566667 | 0.019366667  |
| PLA2G12A  | 0.047133333  | 0.2256       | -0.086033333 | -0.1108      | -0.159333333 |
| RHOT1     | -0.166333333 | -0.0111      | 0.070366667  | -0.395933333 | -0.174966667 |
| ZSCAN18   | -0.005033333 | 0.056733333  | 0.258766667  | -0.057066667 | -0.2299      |
| AGPS      | 0.091666667  | -0.022766667 | -0.0037      | -0.267533333 | -0.186266667 |
| PCBP4     | -0.075533333 | 0.007366667  | 0.188166667  | -0.244566667 | -0.2345      |
| LOC645630 | -0.265033333 | 0.172266667  | -0.284566667 | -0.477566667 | -0.074833333 |
| C14orf82  | -0.1187      | 0.624233333  | -0.160033333 | -0.304566667 | 0.106266667  |
| SPIN4     | 0.632633333  | -0.0465      | 0.327733333  | 0.216833333  | -0.018133333 |
| LOC730098 | -0.0423      | 0.1559       | 0.2188       | -0.169233333 | -0.135833333 |
| C12orf34  | 0.407566667  | 0.085066667  | -0.101566667 | -0.0051      | -0.074366667 |
| LOC646672 | -0.276333333 | 0.2074       | 0.0336       | -0.279566667 | -0.122833333 |
| PRSS12    | -0.0133      | -0.085933333 | 0.180866667  | -0.2611      | -0.102066667 |
| TMEM191A  | -0.1774      | 0.7494       | -0.2278      | -0.3009      | 0.1026       |
| B3GALT6   | 0.257933333  | 0.081366667  | 0.014533333  | -0.241466667 | -0.019366667 |
| EID1      | 0.0663       | 0.0692       | 0.129066667  | -0.061133333 | -0.148       |
| PAGE2B    | -0.1464      | -0.061433333 | 0.192666667  | -0.273766667 | -0.237833333 |
| AGL       | -0.161833333 | -0.3105      | 0.381033333  | -0.334166667 | -0.0973      |
| SDC2      | 0.111733333  | -0.1239      | 0.132233333  | -0.1759      | -0.174       |
| LOC730202 | -0.139533333 | 0.6563       | -0.158833333 | -0.130666667 | -0.026233333 |
| LYZ       | 0.0082       | 0.227366667  | 0.425166667  | -0.194966667 | 0.0209       |
| LAP3      | 0.1255       | 0.013733333  | 0.178833333  | -0.1225      | -0.146133333 |
| PLEKHH1   | -0.089       | -0.014933333 | 0.294366667  | -0.2         | -0.1476      |
| PIGF      | -0.017533333 | 0.234666667  | 0.133033333  | -0.217633333 | -0.0915      |
| AKAP13    | 0.042133333  | 0.1132       | 0.2846       | -0.1012      | -0.1546      |
| AP4E1     | 0.2247       | 0.110166667  | -0.004866667 | -0.0397      | -0.102266667 |
| FOXM1     | 0.306633333  | 0.144233333  | 0.060666667  | -0.031533333 | -0.122933333 |

|              |              |              |              |              |              |
|--------------|--------------|--------------|--------------|--------------|--------------|
| MAPBPIP      | 0.058366667  | -0.126533333 | 0.3442       | -0.107766667 | -0.1952      |
| SNORA61      | 0.4077       | 0.289133333  | -0.024933333 | 0.086833333  | 0.0309       |
| LOC100128221 | -0.036966667 | -0.056266667 | 0.093366667  | -0.213733333 | -0.2063      |
| MYO9A        | 0.0858       | 0.0596       | 0.053266667  | -0.226933333 | -0.138333333 |
| MRPL41       | -0.020833333 | 0.094833333  | -0.026033333 | -0.2858      | -0.0791      |
| NACC2        | 0.2743       | 0.167633333  | 0.1781       | -0.118366667 | -0.021533333 |
| NEURL1B      | 0.169466667  | 0.205333333  | 0.114166667  | 0.0219       | -0.092633333 |
| DNAJC1       | 0.0654       | 0.067766667  | 0.0013       | -0.176033333 | -0.135533333 |
| LPHN1        | -0.0447      | 0.007933333  | 0.211366667  | -0.263433333 | -0.228933333 |
| TOR1AIP1     | 0.0061       | -0.046133333 | 0.203433333  | -0.080366667 | -0.268733333 |
| C12orf32     | 0.176233333  | 0.142266667  | 0.138633333  | 0.0404       | -0.1166      |
| FOXR2        | 0.227133333  | 0.107033333  | 0.037666667  | -0.016066667 | -0.1268      |
| TSPAN12      | -0.0914      | 0.118333333  | 0.2821       | -0.2783      | 0.030333333  |
| TTC32        | 0.0067       | -0.004766667 | 0.0404       | -0.044433333 | -0.230966667 |
| NT5C         | 0.075833333  | 0.229966667  | 0.139233333  | -0.073033333 | -0.063733333 |
| TRRAP        | 0.151566667  | 0.066666667  | 0.1009       | -0.2003      | -0.210633333 |
| TNFRSF21     | 0.399433333  | 0.3877       | 0.639833333  | 0.0589       | 0.336533333  |
| LOC643980    | -0.065366667 | 0.010466667  | 0.175833333  | -0.269133333 | -0.021866667 |
| TAF10        | -0.070233333 | 0.058833333  | 0.2968       | -0.1898      | -0.101466667 |
| ZNF32        | -0.036333333 | 0.092466667  | 0.0624       | -0.3224      | -0.134766667 |
| C6orf70      | -0.041866667 | 0.1842       | 0.0996       | -0.103233333 | -0.101266667 |
| LOC100132499 | 0.032633333  | -0.024066667 | -0.0388      | -0.2037      | -0.3429      |
| HYAL3        | 0.272433333  | 0.1          | 0.1488       | -0.113166667 | -0.0275      |
| FAM3C        | 0.0221       | 0.203166667  | 0.466966667  | -0.136       | -0.059       |
| ZNF329       | 0.1703       | -0.003166667 | 0.0149       | -0.107433333 | -0.0788      |
| CEP164       | 0.096866667  | 0.099433333  | 0.058066667  | -0.0475      | -0.2652      |
| POLR2L       | 0.2688       | 0.279        | 0.1426       | 0.078166667  | -0.045066667 |
| CNN3         | 0.247633333  | 0.161033333  | 0.008433333  | 0.0969       | -0.143833333 |
| ASB6         | 0.314233333  | 0.091533333  | 0.053766667  | 0.108466667  | -0.092466667 |
| LOC100128731 | -0.029866667 | -0.021766667 | 0.343133333  | -0.1863      | -0.122866667 |
| ARL4A        | 0.0313       | 0.1443       | -0.0327      | -0.265866667 | -0.101333333 |
| TGIF2        | 0.291966667  | 0.034133333  | 0.209133333  | 0.144666667  | -0.227033333 |
| TMEM203      | 0.040933333  | 0.005266667  | -0.113166667 | -0.1521      | -0.2585      |
| LOC652608    | -0.2847      | 0.2244       | -0.244266667 | -0.3993      | -0.014333333 |
| FIZ1         | 0.209666667  | 0.105066667  | 0.004966667  | -0.150966667 | -0.1289      |
| MOCOS        | -0.1278      | -0.033366667 | 0.290866667  | -0.349466667 | -0.166333333 |
| PPP1R10      | 0.2364       | 0.345233333  | 0.3217       | -0.037333333 | 0.143533333  |
| LTBR         | 0.0716       | 0.046333333  | 0.245666667  | 0.002066667  | -0.208566667 |
| ZNF227       | 0.180266667  | 0.1169       | -0.004       | -0.048       | -0.182333333 |
| CLDN23       | -0.135333333 | 0.040633333  | 0.146966667  | -0.349233333 | -0.175633333 |
| RNF130       | -0.0255      | -0.129233333 | 0.199466667  | -0.184066667 | -0.224833333 |
| KIAA0895     | 0.134666667  | -0.0018      | 0.003566667  | -0.007333333 | -0.200233333 |
| HAUS4        | 0.1285       | -0.034733333 | 0.1559       | -0.163933333 | 0.0105       |
| CNKS3        | -0.075166667 | -0.000933333 | 0.192433333  | -0.1752      | -0.1061      |
| BCLAF1       | 0.339766667  | -0.055233333 | 0.151766667  | 0.054433333  | -0.020366667 |
| LOC100128086 | 0.159233333  | 0.118633333  | 0.092933333  | -0.0648      | -0.200766667 |
| CHP          | -0.374166667 | 0.146733333  | 0.3805       | -0.3266      | -0.118433333 |

|            |              |              |              |              |              |
|------------|--------------|--------------|--------------|--------------|--------------|
| ANGPT1     | -0.012533333 | 0.0984       | 0.195066667  | -0.164933333 | -0.0174      |
| FAM127A    | -0.154766667 | 0.001966667  | 0.2549       | -0.25        | -0.190066667 |
| CKAP2L     | 0.343        | 0.384666667  | 0.260033333  | 0.149266667  | 0.0202       |
| C9orf169   | -0.0382      | 0.231033333  | -0.050266667 | -0.283766667 | 0.012866667  |
| DOPEY2     | -0.207       | 0.589966667  | -0.1311      | -0.2309      | -0.028233333 |
| ACN9       | 0.188766667  | 0.281366667  | 0.156533333  | -0.025033333 | 0.008533333  |
| ZNF239     | 0.127733333  | 0.122266667  | 0.1432       | -0.350733333 | 0.072366667  |
| LOC730496  | 0.2119       | -0.0285      | 0.174766667  | -0.1069      | -0.0932      |
| CARD8      | -0.006466667 | 0.296933333  | 0.033466667  | -0.1846      | -0.091833333 |
| TWIST1     | 0.0183       | -0.1169      | 0.263966667  | -0.236966667 | -0.1262      |
| KIAA1712   | 0.1348       | 0.1116       | 0.160166667  | -0.085366667 | -0.0023      |
| TTC33      | -0.0654      | -0.0206      | 0.210933333  | -0.182366667 | -0.178033333 |
| SRC        | 0.278866667  | 0.220633333  | 0.1913       | 0.0271       | -0.092833333 |
| UBE3B      | -0.1173      | 0.149133333  | 0.1595       | -0.187433333 | -0.266433333 |
| SRGAP2     | 0.1863       | 0.0507       | 0.497466667  | -0.067533333 | 0.03         |
| FAM127B    | -0.055933333 | -0.048033333 | 0.194966667  | -0.261866667 | -0.167266667 |
| ZNF773     | 0.013466667  | 0.365933333  | -0.1039      | -0.2068      | -0.066       |
| RAB5B      | -0.012866667 | -0.0905      | 0.2924       | -0.258733333 | -0.117333333 |
| CREG1      | 0.0489       | -0.165266667 | 0.0514       | -0.188066667 | -0.294333333 |
| LOC730051  | 0.2183       | 0.263733333  | 0.176433333  | 0.0643       | -0.1519      |
| RPL7       | -0.037766667 | 0.0988       | -0.036333333 | -0.275533333 | -0.228833333 |
| PCMTD2     | -0.010133333 | -0.014433333 | 0.141033333  | -0.234766667 | -0.1138      |
| GYS1       | 0.022833333  | 0.073466667  | 0.163        | -0.269633333 | -0.086533333 |
| NCRNA00219 | 0.002566667  | -0.209933333 | 0.027666667  | -0.1406      | -0.282533333 |
| LOC730302  | 0.135533333  | 0.088866667  | 0.1288       | -0.1372      | -0.1162      |
| MAP3K10    | -0.010233333 | 0.183433333  | 0.105066667  | -0.1289      | -0.2352      |
| WDR48      | -0.021633333 | 0.096433333  | 0.251233333  | -0.0952      | -0.122366667 |
| LOC442270  | -0.420633333 | 0.2178       | -0.156433333 | -0.5409      | -0.0411      |
| HOXC9      | 0.054266667  | 0.056833333  | 0.267066667  | -0.0446      | -0.046166667 |
| LOC652624  | 0.014033333  | 0.092733333  | 0.221366667  | 0.018266667  | -0.252466667 |
| TAOK1      | 0.1024       | -0.024233333 | 0.2323       | -0.034766667 | -0.1652      |
| UNC84A     | 0.084666667  | 0.106933333  | 0.160933333  | -0.015566667 | -0.216633333 |
| STAMPB     | -0.1045      | 0.17         | 0.0405       | -0.476933333 | -0.0307      |
| LOC146053  | -0.320333333 | 0.272        | -0.203333333 | -0.4171      | -0.032033333 |
| WDR72      | -0.150933333 | 0.0777       | 0.0754       | -0.324466667 | -0.1453      |
| FLRT2      | 0.044266667  | -0.020366667 | -0.006933333 | -0.214966667 | -0.218233333 |
| C3orf31    | 0.1274       | 0.140666667  | 0.137666667  | -0.081233333 | -0.039566667 |
| APOC1      | -0.168133333 | 0.0597       | 0.3735       | -0.191066667 | -0.209333333 |
| LOC729057  | 0.612        | 0.168333333  | 0.004433333  | 0.173        | -0.101133333 |
| C15orf42   | 0.389066667  | 0.0885       | 0.174466667  | 0.079366667  | -0.011066667 |
| ALPK1      | -0.189366667 | 0.189266667  | -0.005966667 | -0.404066667 | -0.188233333 |
| LOC441154  | -0.313266667 | 0.246466667  | -0.000366667 | -0.291866667 | -0.0946      |
| ZNF706     | -0.152866667 | 0.036633333  | 0.076566667  | -0.375166667 | 0.0155       |
| AP3S2      | 0.1788       | -0.027366667 | 0.015733333  | -0.1337      | -0.1177      |
| PSCD1      | 0.3045       | 0.228433333  | 0.072266667  | 0.081633333  | -0.007       |
| GNB5       | 0.269166667  | 0.1522       | 0.24         | 0.050066667  | 3.00E-04     |
| DENND4B    | 0.000766667  | 0.121966667  | 0.2125       | -0.223933333 | -0.150866667 |



|              |              |              |              |              |              |
|--------------|--------------|--------------|--------------|--------------|--------------|
| ARMC7        | 0.114033333  | 0.083266667  | 0.102766667  | -0.198533333 | -0.1101      |
| PPAP2A       | -0.2413      | -0.015533333 | 0.0735       | -0.3994      | -0.223133333 |
| C9orf69      | 0.1769       | -0.0484      | 0.018933333  | -0.306566667 | -0.124866667 |
| PITX2        | -0.032333333 | -0.000266667 | 0.223066667  | -0.197433333 | -0.1126      |
| SLC22A4      | 0.066666667  | 0.0718       | 0.204766667  | -0.169733333 | -0.1203      |
| TRIM41       | 0.1929       | 0.120066667  | 0.192333333  | -0.046433333 | -0.0281      |
| ROMO1        | -0.0036      | -0.062733333 | 0.274633333  | -0.184166667 | -0.067366667 |
| FAM188B      | 0.142233333  | 0.0833       | 0.0989       | -0.2275      | 0.033833333  |
| ARPP19       | 0.5367       | -0.006066667 | 0.036733333  | 0.144833333  | -0.130266667 |
| GNPAT        | -0.0106      | 0.156133333  | 0.0346       | -0.215933333 | -0.046866667 |
| NUBPL        | -0.1902      | 0.756466667  | -0.1241      | -0.2401      | 0.087366667  |
| LOC441876    | 0.075666667  | 0.117066667  | 0.1936       | -0.1074      | 0.003866667  |
| LOC648622    | 0.035133333  | -0.1001      | 0.3075       | -0.1543      | -0.120766667 |
| LOC100133067 | -0.121633333 | 0.1234       | 0.1499       | -0.2584      | -0.204366667 |
| MFGE8        | -0.014633333 | -0.174133333 | 0.1681       | -0.3348      | -0.233633333 |
| LAD1         | -0.0559      | 0.065133333  | 0.2157       | -0.337966667 | -0.215933333 |
| TMEM4        | -0.156833333 | -0.012033333 | 0.309233333  | -0.277633333 | -0.074666667 |
| ZNF565       | 0.112733333  | 0.053566667  | 0.069033333  | -0.116066667 | -0.182633333 |
| SLC37A4      | 0.0359       | 0.132333333  | 0.205133333  | -0.260166667 | -0.0791      |
| LAMC1        | 0.067566667  | -0.0244      | 0.4361       | -0.106333333 | -0.1154      |
| DHCR7        | 0.080566667  | 0.163966667  | 0.2124       | -0.142566667 | -0.056466667 |
| RNF213       | -0.131066667 | 0.759266667  | -0.104266667 | -0.1353      | 0.060066667  |
| SPTBN1       | 0.0724       | 0.0245       | 0.297233333  | -0.128033333 | -0.114233333 |
| LOC730256    | -0.077266667 | -0.053733333 | 0.3334       | -0.168233333 | -0.2968      |
| RBM47        | -0.349133333 | 0.0927       | 0.182366667  | -0.6327      | -0.0651      |
| PRDX5        | -0.2147      | -0.0488      | 0.1763       | -0.383733333 | -0.202833333 |
| LYRM2        | 0.111066667  | -0.078133333 | 0.090166667  | -0.2155      | -0.1267      |
| JAG1         | 0.2992       | 0.0592       | 0.2304       | -0.1162      | -0.086166667 |
| RBCK1        | -0.298133333 | 0.0135       | 0.2222       | -0.4606      | -0.0979      |
| DCPS         | 0.387366667  | 0.1882       | 0.3031       | -0.019333333 | -0.0066      |
| SEPNI        | -0.0238      | -0.013266667 | 0.1032       | -0.191033333 | -0.303933333 |
| GANAB        | 0.051266667  | 0.025566667  | 0.0894       | -0.2544      | -0.178533333 |
| C21orf33     | -0.3096      | 0.1025       | 0.250966667  | -0.4302      | -0.095166667 |
| ALDH1B1      | 0.452866667  | 0.284166667  | -0.065333333 | -0.015433333 | 0.1047       |
| ZNF264       | 0.068266667  | 0.020566667  | 0.087266667  | -0.0965      | -0.2161      |
| RBBP9        | 0.1479       | 0.007266667  | 0.112966667  | -0.198266667 | -0.105333333 |
| DEDD2        | 0.218333333  | 0.029633333  | 0.032066667  | -0.074033333 | -0.1357      |
| ARL2         | -0.0633      | -0.005166667 | 0.1583       | -0.3043      | -0.155866667 |
| HIBADH       | -0.227333333 | -0.094733333 | 0.318233333  | -0.373133333 | -0.148366667 |
| MIR302C      | 0.036766667  | 0.095        | 0.5985       | -0.009133333 | -0.0104      |
| EIF4EBP2     | 0.272933333  | 0.056866667  | 0.0374       | 0.001833333  | -0.222933333 |
| FAM116A      | 0.058733333  | 0.063733333  | 0.183133333  | -0.169133333 | -0.064733333 |
| SEMA6B       | -0.125433333 | 0.206333333  | 0.4004       | -0.241433333 | 0.012        |
| TMEM2        | 0.559866667  | 0.168866667  | 0.3321       | 0.064833333  | 0.1151       |
| DNAJB2       | 0.1339       | 0.076733333  | -0.188433333 | -0.0136      | -0.208       |
| NUP133       | 0.025033333  | 0.237166667  | 0.190966667  | -0.069333333 | -0.1214      |
| RGS12        | 0.192466667  | 0.170433333  | 0.227033333  | -0.044       | 0.0228       |

|              |              |              |              |              |              |
|--------------|--------------|--------------|--------------|--------------|--------------|
| C19orf25     | 0.185466667  | 0.149533333  | 0.0573       | -0.084433333 | -0.058166667 |
| FLJ35934     | 0.056166667  | 0.0663       | 0.0976       | -0.2598      | -0.149466667 |
| LOC100127975 | -0.212966667 | 0.760533333  | -0.073033333 | -0.235566667 | 0.103233333  |
| FAM158A      | 0.063666667  | 0.209366667  | 0.065933333  | -0.1666      | -0.084266667 |
| PHB2         | 0.076733333  | 0.168533333  | 0.0272       | -0.163066667 | -0.2486      |
| CXCL16       | 0.058166667  | -0.1275      | 0.218633333  | -0.203033333 | -0.219866667 |
| SARM1        | 0.079266667  | -0.045633333 | 0.093533333  | -0.357533333 | -0.049866667 |
| MTHFD1       | 0.2878       | 0.1751       | 0.0895       | -0.0234      | -0.089333333 |
| APIP         | 0.021566667  | 0.2752       | 0.169733333  | -0.0809      | -0.027066667 |
| SIRT2        | -0.0363      | -0.037733333 | 0.146133333  | -0.2488      | -0.2564      |
| TMSB4X       | -0.131533333 | -0.1316      | 0.378433333  | -0.398666667 | -0.2468      |
| AHCY         | 0.041233333  | 0.046766667  | 0.091366667  | -0.236033333 | -0.161966667 |
| C12orf48     | 0.2401       | 0.188233333  | -0.016166667 | -0.1633      | 0.0118       |
| TMEM70       | -0.485233333 | 0.339766667  | -0.6504      | -0.738933333 | 0.120633333  |
| NR3C1        | 9.00E-04     | 0.1123       | -0.060133333 | -0.1248      | -0.300566667 |
| WRB          | -0.312333333 | 0.1177       | -0.0145      | -0.490466667 | -0.0584      |
| BLOC1S1      | -0.1957      | -0.0837      | 0.079933333  | -0.495333333 | -0.185566667 |
| LOC100132717 | 0.0445       | -0.2196      | 0.248733333  | -0.3137      | -0.1493      |
| LOC100128994 | -0.008366667 | 0.104266667  | 0.161933333  | -0.132133333 | -0.2192      |
| SNUPN        | -0.0333      | 0.029566667  | 0.294666667  | -0.262066667 | -0.156033333 |
| CYTH1        | 0.303866667  | 0.119566667  | 0.1375       | 0.088433333  | -0.118066667 |
| DAAM2        | 0.319533333  | 0.028333333  | 0.167666667  | -0.0992      | -0.1358      |
| HYLS1        | 0.158033333  | 0.324433333  | 0.228233333  | -0.030966667 | 0.049766667  |
| PARP1        | 0.332366667  | 0.2101       | 0.125033333  | -0.035833333 | -0.0211      |
| NCBP1        | 0.189333333  | 0.1538       | 0.182866667  | -0.083366667 | 0.035166667  |
| HDAC6        | 0.0123       | 0.0161       | 0.207433333  | -0.244733333 | -0.1242      |
| KIAA0101     | 0.467033333  | 0.0911       | 0.103133333  | 0.1522       | -0.058266667 |
| DUSP22       | -0.1724      | 0.0886       | 0.027366667  | -0.4249      | -0.083533333 |
| NRSN2        | -0.2495      | -0.019233333 | 0.2158       | -0.369733333 | -0.271233333 |
| MTERF        | 0.034666667  | 0.360533333  | 0.017333333  | -0.161533333 | -0.0584      |
| ANKRD54      | 0.3313       | 0.112533333  | 0.1334       | 0.134966667  | -0.097866667 |
| VPS16        | -0.179666667 | 0.060766667  | 0.305866667  | -0.351033333 | -0.097066667 |
| GRAMD3       | -0.0049      | 0.1271       | 0.281566667  | -0.140533333 | -0.063433333 |
| NUP188       | 0.4841       | 0.1514       | 0.107566667  | 0.039233333  | 0.068633333  |
| BEND5        | -0.038033333 | -0.0463      | 0.344433333  | -0.2021      | -0.077833333 |
| ISG20        | -0.317066667 | -0.058666667 | 0.762        | -0.352733333 | -0.1282      |
| TWSG1        | 0.3102       | 0.1303       | 0.106366667  | 0.068433333  | -0.124166667 |
| SLC38A10     | 0.071066667  | 0.052333333  | 0.253166667  | -0.141633333 | -0.140066667 |
| MALT1        | 0.354666667  | 0.369366667  | 0.474333333  | 0.263433333  | 0.0477       |
| NAB1         | 0.103466667  | -0.0095      | 0.1806       | -0.178366667 | -0.1168      |
| DCAF7        | -0.166333333 | 0.0504       | 0.385433333  | -0.2405      | -0.166366667 |
| LOC440926    | -0.3417      | 0.205733333  | -0.160166667 | -0.5092      | 0.083666667  |
| TMEM143      | -0.1775      | 0.005766667  | 0.177533333  | -0.247966667 | -0.226266667 |
| CPNE3        | 0.2317       | -0.029966667 | 0.0898       | -0.114833333 | -0.085133333 |
| BPTF         | -0.056366667 | 0.105133333  | 0.252833333  | -0.234033333 | -0.1211      |
| FAM172A      | -0.062133333 | 0.0297       | 0.060933333  | -0.294866667 | -0.233333333 |
| ATP9A        | -0.205766667 | -0.033733333 | 0.420666667  | -0.3059      | -0.224733333 |

|              |              |              |              |              |              |
|--------------|--------------|--------------|--------------|--------------|--------------|
| KCNJ2        | 0.145966667  | 0.363766667  | 0.229433333  | -0.087033333 | 0.100833333  |
| LOC654254    | 0.197733333  | 0.186466667  | 0.123066667  | -0.0878      | -0.0581      |
| LOC100133390 | 0.218266667  | 0.066966667  | 0.137833333  | 0.010766667  | -0.2406      |
| TOP2A        | 0.1149       | 0.3405       | 0.295033333  | 0.084633333  | -0.177066667 |
| SNORD96A     | 0.620966667  | 0.318466667  | 0.022033333  | 0.3194       | 0.1195       |
| LOC346950    | -0.1865      | 0.206466667  | -0.0056      | -0.2767      | -0.1215      |
| LOC727980    | 0.5011       | 0.226633333  | 0.089        | 0.254933333  | -0.081733333 |
| LOC728661    | -0.501766667 | -0.091533333 | 0.1493       | -0.739166667 | -0.345866667 |
| LOC100131578 | -0.186366667 | -0.060166667 | 0.192366667  | -0.3603      | -0.210566667 |
| BBS4         | 0.084233333  | -0.045666667 | 0.0554       | -0.2344      | -0.240633333 |
| C6orf141     | -0.475866667 | -0.072466667 | 0.3703       | -0.580766667 | -0.253866667 |
| MAN2A1       | -0.0305      | 0.0649       | -0.015266667 | -0.294833333 | -0.201933333 |
| DDX19A       | 0.329566667  | 0.107        | 0.135166667  | -0.016033333 | -0.0335      |
| BUB3         | 0.1307       | 0.415633333  | 0.169933333  | 0.024333333  | 0.019866667  |
| MDP1         | -0.0395      | -0.036166667 | 0.159133333  | -0.228566667 | -0.248533333 |
| ADAT1        | 0.091833333  | 0.105233333  | -0.0291      | -0.419133333 | -0.0923      |
| ATF5         | 0.5979       | 0.072466667  | -0.049933333 | 0.287        | -0.2613      |
| EFHA1        | 0.199233333  | 0.073866667  | 0.176733333  | -0.098       | -0.0524      |
| SYNGR1       | -0.1307      | 0.0417       | 0.642066667  | -0.1857      | -0.113566667 |
| GTF2I        | 0.120866667  | 0.1325       | 0.2476       | -0.147733333 | -0.034633333 |
| TAF9L        | 0.121766667  | 0.1723       | -0.0381      | -0.0341      | -0.1         |
| LOC100130053 | -0.0571      | 0.829133333  | -0.0903      | -0.228533333 | 0.076433333  |
| NOTCH1       | 0.1299       | 0.0996       | 0.052766667  | -0.1822      | -0.052233333 |
| CD276        | 0.227966667  | 0.136066667  | 0.228366667  | -0.098666667 | -0.0798      |
| NR4A2        | 0.033466667  | -0.0654      | 0.619433333  | -0.008833333 | -0.123933333 |
| MED29        | 0.192966667  | 0.191        | -0.035333333 | -0.095833333 | -0.074733333 |
| PPIL3        | 0.098        | 0.089933333  | 0.030833333  | -0.182033333 | -0.142233333 |
| C11orf1      | -3.33E-05    | -0.302666667 | 0.099633333  | -0.363133333 | -0.298033333 |
| C16orf7      | -0.099133333 | -0.0096      | 0.0839       | -0.325233333 | -0.2401      |
| GPD2         | 0.2958       | 0.1903       | 0.110366667  | 0.000666667  | -0.066833333 |
| PCYOX1       | -0.382033333 | 0.272633333  | 0.0551       | -0.502       | 0.012733333  |
| ZNF524       | -0.0696      | 0.062266667  | -0.010233333 | -0.2101      | -0.287333333 |
| GRAMD4       | -0.025533333 | 0.08         | 0.117833333  | -0.246233333 | -0.139933333 |
| LOC100129828 | 0.030433333  | 0.1065       | 0.197066667  | -0.309133333 | -0.088333333 |
| DYM          | -0.012833333 | 0.0037       | 0.0691       | -0.258133333 | -0.181866667 |
| ISL1         | 0.200933333  | 0.356566667  | 0.2385       | -0.031333333 | 0.076866667  |
| SMARCC2      | 0.0259       | 0.031066667  | 0.279266667  | -0.166466667 | -0.138333333 |
| SRP14P1      | -0.0879      | -0.004833333 | 0.2268       | -0.2694      | -0.1581      |
| KIAA1310     | 0.098066667  | -0.002666667 | 0.1558       | -0.1875      | -0.1471      |
| PDE5A        | -0.224066667 | -0.07        | 0.258        | -0.245       | -0.2704      |
| LOC100128060 | -0.098533333 | 0.180266667  | -0.2144      | -0.3578      | -0.083733333 |
| ZNF551       | 0.290233333  | 0.310766667  | 0.107333333  | -0.025466667 | 0.045933333  |
| ABI2         | 0.0844       | 0.0496       | 0.475866667  | -0.0802      | -0.1247      |
| RABGAP1L     | -0.050466667 | 0.113433333  | 0.142866667  | -0.316666667 | -0.1395      |
| TNFAIP8L1    | -0.014166667 | 0.365233333  | 0.527366667  | -0.035733333 | 0.073366667  |
| C10orf58     | -0.094966667 | 0.074233333  | 0.213666667  | -0.2822      | -0.142633333 |
| TRA2A        | 0.483166667  | 0.2899       | 0.053766667  | 0.1512       | -0.0644      |

|              |              |              |              |              |              |
|--------------|--------------|--------------|--------------|--------------|--------------|
| LOC644863    | -0.001366667 | 0.0057       | 0.154866667  | -0.273533333 | -0.155766667 |
| CDKN3        | 0.295533333  | 0.198866667  | -0.0072      | 0.0742       | -0.145133333 |
| ST3GAL4      | 0.0473       | 0.0568       | 0.3642       | -0.264266667 | -0.174333333 |
| SFRS14       | 0.028566667  | 0.2506       | 0.352066667  | -0.050466667 | 0.0054       |
| LOC644517    | 0.011533333  | 0.006666667  | 0.217733333  | -0.293533333 | -0.110033333 |
| ATG9A        | 0.1341       | 0.0392       | 0.091066667  | 0.052433333  | -0.328466667 |
| RERE         | 0.313033333  | 0.0987       | 0.1605       | -0.0041      | -0.144833333 |
| RPL13L       | -0.155433333 | -0.039233333 | 0.176166667  | -0.305533333 | -0.2323      |
| RNF26        | 0.228033333  | 0.250966667  | 0.218333333  | 0.093933333  | -0.066233333 |
| PAGE2        | -0.087566667 | -0.062833333 | 0.251966667  | -0.323866667 | -0.164133333 |
| LOC729466    | 0.041433333  | 0.0486       | 0.1901       | -0.1736      | -0.187566667 |
| CLDN14       | 0.0929       | 0.247633333  | 0.2855       | -0.0955      | 0.056066667  |
| PEX11B       | -0.1111      | -0.017866667 | 0.200466667  | -0.328466667 | -0.227233333 |
| DDX50        | -0.0071      | 0.2477       | 0.1872       | -0.086466667 | -0.152933333 |
| PDCD2L       | 0.4736       | 0.242633333  | -0.008433333 | 0.074366667  | -0.0244      |
| ZNF211       | -0.036233333 | 0.222966667  | 0.0311       | -0.103       | -0.141733333 |
| SCD          | -0.3697      | -0.179433333 | 0.509266667  | -0.429633333 | -0.3727      |
| ID1          | -0.616066667 | 0.008133333  | 0.241733333  | -0.911566667 | -0.2296      |
| LOC729484    | -0.305266667 | 0.3844       | -0.197666667 | -0.351433333 | 0.024466667  |
| PANK2        | 0.3551       | 0.173966667  | 0.1233       | 0.045533333  | -0.124366667 |
| LSS          | 0.157533333  | -0.0752      | 0.1086       | -0.238533333 | -0.185666667 |
| NLRX1        | -0.113666667 | 0.024966667  | 0.104066667  | -0.320466667 | -0.1938      |
| C5orf51      | 0.034566667  | 0.0381       | 0.024666667  | -0.1362      | -0.1851      |
| CHD9         | -0.1725      | -0.4454      | 0.393466667  | -0.488233333 | -0.100966667 |
| C11orf60     | 0.127633333  | 0.152933333  | 0.160333333  | -0.132533333 | -0.104666667 |
| XRCC1        | -0.010233333 | 0.279433333  | 0.133833333  | -0.1297      | -0.0367      |
| BAT2D1       | 0.427433333  | 0.151566667  | 0.0352       | 0.064233333  | -0.140633333 |
| C12orf26     | 0.115633333  | 0.2025       | -0.025633333 | -0.1601      | -0.144633333 |
| TSPAN9       | 0.0014       | -0.022833333 | 0.3446       | -0.219233333 | -0.1766      |
| C8orf40      | -0.201766667 | -0.094033333 | 0.103633333  | -0.393766667 | -0.333       |
| LOC440487    | -0.145633333 | 0.370166667  | -0.035333333 | -0.2582      | 0.028766667  |
| ARRDC3       | -0.128133333 | 0.0085       | 0.123933333  | -0.354466667 | -0.1532      |
| SNORD36A     | 0.4725       | 0.470833333  | -0.167866667 | 0.191633333  | 0.156766667  |
| VPS41        | -0.243533333 | 0.014233333  | 0.083033333  | -0.4956      | -0.197066667 |
| SATB2        | 0.097        | 0.159033333  | 0.180966667  | -0.1361      | -0.159766667 |
| COL8A1       | 0.179866667  | 0.139633333  | 0.492433333  | -0.1156      | 0.0967       |
| NUMA1        | 0.221333333  | -0.100633333 | 0.235333333  | -0.07        | -0.246833333 |
| DPP8         | 0.121566667  | 0.124333333  | -0.0017      | -0.202       | -0.202666667 |
| CTAG1A       | -0.024033333 | -0.301266667 | 0.169733333  | -0.405966667 | -0.359866667 |
| CNOT8        | -0.182366667 | 0.0628       | 0.350766667  | -0.160033333 | -0.168066667 |
| LOC441376    | 0.192533333  | 0.111        | 0.109766667  | 0.002566667  | -0.1614      |
| GPM6A        | 0.041533333  | 0.2701       | 0.473033333  | 0.002966667  | -0.032033333 |
| NOP10        | 0.267        | 0.158733333  | 0.143866667  | -0.0914      | -0.041366667 |
| ZNF419       | -0.0685      | -0.010566667 | 0.074166667  | -0.2467      | -0.293433333 |
| KIAA0319L    | -0.266166667 | 0.046133333  | 0.339866667  | -0.363833333 | -0.091966667 |
| LOC100133913 | 0.3444       | 0.065133333  | 0.330366667  | -0.0812      | 0.0006       |
| LOC283683    | 0.205333333  | 0.4323       | 0.004533333  | -0.139766667 | 0.108466667  |

|              |              |              |              |              |              |
|--------------|--------------|--------------|--------------|--------------|--------------|
| SGOL2        | 0.095633333  | 0.319033333  | 0.225866667  | 0.086        | 0.031633333  |
| LOC728658    | 0.068033333  | 0.068266667  | 0.203766667  | -0.117733333 | -0.064766667 |
| TAP1         | 0.0256       | 0.010233333  | 0.120133333  | -0.222733333 | -0.1447      |
| FKBP1B       | 0.1146       | -0.0126      | 0.195533333  | -0.1388      | -0.1844      |
| BCOR         | 0.35         | 0.056733333  | 0.2066       | 0.040766667  | -0.2369      |
| CAPN5        | -0.144033333 | 0.091966667  | 0.284933333  | -0.4528      | -0.070733333 |
| LOC730173    | 0.056166667  | -0.020533333 | 0.207633333  | -0.278133333 | -0.136533333 |
| SFRS16       | 0.3644       | 0.1809       | 0.1406       | 0.0439       | -0.047966667 |
| LOC729082    | 0.279833333  | 0.2419       | 0.1461       | 0.011633333  | 0.0217       |
| LOC642934    | -0.090266667 | 0.072833333  | 0.131933333  | -0.193433333 | -0.1532      |
| KHDRBS3      | -0.011966667 | -0.0735      | 0.185533333  | -0.230266667 | -0.261       |
| TMEM97       | 0.5687       | 0.322366667  | -0.029533333 | 0.161133333  | 0.082633333  |
| SSBP2        | -0.077833333 | -0.0484      | 0.0519       | -0.354833333 | -0.263433333 |
| GP1BA        | 0.237533333  | 0.002866667  | 0.178533333  | -0.0318      | -0.2556      |
| PIGC         | 0.2015       | 0.078666667  | -0.001466667 | -0.0207      | -0.1185      |
| PBX3         | 0.530333333  | 0.0214       | 0.295633333  | 0.1105       | -0.000133333 |
| XAGE1A       | 0.154566667  | 0.050766667  | 0.222166667  | -0.188033333 | -0.1439      |
| LOC148915    | 0.3445       | 0.253833333  | -0.049866667 | 0.087933333  | -0.047233333 |
| LOC651380    | -0.0308      | 0.016466667  | 0.1142       | -0.245066667 | -0.026433333 |
| C19orf70     | 0.048866667  | 0.019966667  | 0.0855       | -0.184       | -0.2221      |
| CMTM8        | -0.023766667 | 0.0129       | 0.446066667  | -0.212433333 | -0.1441      |
| CADM4        | 0.313233333  | -0.170366667 | -0.023933333 | 0.067566667  | -0.221166667 |
| FTSJ2        | 0.107366667  | 0.2312       | 0.095033333  | -0.033666667 | -0.187033333 |
| BMP1         | 0.068666667  | 0.007133333  | 0.176333333  | -0.102033333 | -0.257966667 |
| EP400        | 0.176366667  | 0.066        | 0.076133333  | -0.1154      | -0.296133333 |
| TOMM40       | 0.417433333  | 0.256266667  | 0.033633333  | 0.065133333  | 0.0504       |
| COX8A        | 0.055633333  | -0.148533333 | 0.179466667  | -0.213166667 | -0.284       |
| ZNF175       | 0.051666667  | 0.110633333  | 0.188966667  | -0.197933333 | -0.102133333 |
| HSPA5        | -0.1036      | 0.210466667  | 0.357533333  | -0.343033333 | 0.0709       |
| PRAF2        | -0.193333333 | 0.076166667  | 0.547566667  | -0.257766667 | -0.098766667 |
| LOC100131526 | -0.4284      | 0.331833333  | -0.1101      | -0.378166667 | -0.160366667 |
| RPTOR        | 0.182033333  | 0.324866667  | 0.020066667  | -0.1554      | -0.0829      |
| SNX8         | 0.035466667  | 0.008333333  | 0.339066667  | -0.2537      | -0.210133333 |
| MIF4GD       | -0.2644      | 0.1458       | 0.197566667  | -0.357233333 | -0.152533333 |
| LEPREL1      | 0.203166667  | 0.043766667  | -0.006066667 | 0.012933333  | -0.113866667 |
| NICN1        | -0.156933333 | -0.001133333 | 0.270266667  | -0.286166667 | -0.108933333 |
| UBLCP1       | -0.0031      | 0.0096       | -0.0043      | -0.3372      | -0.1227      |
| GCNT1        | 0.0556       | -0.199833333 | 0.035633333  | -0.217566667 | -0.284       |
| RBM16        | 0.269466667  | 0.1819       | 0.050433333  | -0.011366667 | -0.157633333 |
| USP34        | 0.0453       | 0.0516       | 0.235933333  | -0.2453      | -0.0776      |
| SAMD11       | -0.100633333 | -0.008533333 | 0.464933333  | -0.1833      | -0.1188      |
| LOC100132673 | -0.339833333 | 0.158166667  | -0.1454      | -0.365766667 | -0.0864      |
| PELI1        | 0.094866667  | 0.107666667  | 0.049033333  | -0.2456      | -0.1965      |
| DKFZp434K191 | -0.047233333 | 0.906766667  | -0.061133333 | -0.107066667 | 0.144166667  |
| LOC100131718 | -0.114233333 | 0.8818       | -0.198833333 | -0.311966667 | 0.117566667  |
| COBLL1       | 0.065566667  | 0.109833333  | -0.0191      | -0.145833333 | -0.191033333 |
| WWC3         | 0.1291       | 0.1981       | 0.297633333  | -0.0894      | 0.0088       |

|              |              |              |              |              |              |
|--------------|--------------|--------------|--------------|--------------|--------------|
| ZNF550       | 0.180966667  | 0.0543       | 0.1958       | -0.034433333 | -0.1124      |
| PCDHB19P     | -0.1206      | 0.478833333  | 0.1008       | -0.1979      | -0.006933333 |
| CASC5        | 0.307966667  | 0.255866667  | 0.237566667  | 0.091633333  | -0.001766667 |
| DKK3         | -0.508366667 | -0.075933333 | 0.540566667  | -0.517966667 | -0.416733333 |
| C21orf34     | -0.489933333 | -0.062566667 | 0.413        | -0.458333333 | -0.3757      |
| CCNB2        | 0.2462       | 0.234333333  | 0.119033333  | 0.0426       | -0.0837      |
| BLVRA        | -0.054966667 | 0.042666667  | 0.190266667  | -0.311033333 | -0.153033333 |
| S100A10      | 0.089833333  | 0.1937       | 0.0627       | -0.1723      | -0.047566667 |
| LOC100128760 | 0.294666667  | 0.14         | 0.215966667  | 0.079533333  | -0.113466667 |
| CPS1         | -0.233       | 0.143        | 0.2178       | -0.3061      | -0.2393      |
| TIGA1        | -0.0386      | -0.340533333 | -0.156466667 | -0.299033333 | -0.413466667 |
| PRELID1      | 0.288533333  | 0.011        | 0.0783       | -0.0635      | -0.007066667 |
| PABPN1       | 0.342033333  | 0.2362       | -0.0058      | -0.0025      | -0.055633333 |
| C22orf30     | 0.1462       | 0.093466667  | 0.2448       | -0.057766667 | -0.235366667 |
| PMS2L4       | -0.052366667 | 0.014833333  | 0.082533333  | -0.299166667 | -0.064133333 |
| ZNF473       | 0.3314       | 0.045933333  | 0.2085       | 0.014766667  | -0.154866667 |
| NGFRAP1      | -0.1757      | -0.058033333 | 0.265133333  | -0.386533333 | -0.297766667 |
| ZMYM3        | -0.073933333 | 0.1475       | 0.450866667  | -0.300333333 | -0.004866667 |
| MSLN         | -0.0487      | 0.153933333  | 0.3101       | -0.246566667 | -0.107666667 |
| PTHLH        | 0.822        | 0.380966667  | -0.3129      | 0.1273       | 0.052633333  |
| HIBCH        | -0.053066667 | 0.240033333  | 0.223066667  | -0.279933333 | 0.0233       |
| TMEM63A      | 0.054266667  | 0.179666667  | 0.2633       | -0.140033333 | -0.104366667 |
| GLDC         | 0.093366667  | 0.170433333  | 0.4589       | -0.1281      | 0.041433333  |
| FBXO4        | 0.032733333  | -0.065366667 | 0.185066667  | -0.2887      | -0.2753      |
| LOC441150    | 0.0529       | 0.079766667  | 0.138833333  | -0.205833333 | -0.1648      |
| NMT2         | 0.238533333  | 0.183666667  | 0.2825       | -0.141866667 | 0.109166667  |
| IPO5         | 0.350633333  | 0.267        | 0.093733333  | 0.025933333  | -0.043933333 |
| AVEN         | 0.0307       | 0.1516       | 0.1379       | -0.1321      | -0.118066667 |
| C15orf21     | 0.0606       | 0.4653       | -0.207666667 | -0.1175      | 0.074766667  |
| LOC642333    | 0.0348       | 0.176533333  | 0.113033333  | -0.2875      | -0.025133333 |
| SYMPK        | 0.240966667  | 0.156233333  | 0.180933333  | -0.009833333 | -0.169333333 |
| C6orf170     | -0.138666667 | 0.6608       | -0.147433333 | -0.217166667 | 0.064233333  |
| FAM156A      | 0.362266667  | 0.1645       | 0.028833333  | 0.000233333  | -0.196733333 |
| LOC648343    | -0.3611      | 0.086766667  | -0.357433333 | -0.6374      | -0.189866667 |
| KIFC2        | 0.0068       | 0.098033333  | -0.0325      | -0.289066667 | -0.302533333 |
| BRSK1        | 0.0419       | 0.1581       | 0.536666667  | -0.183666667 | -0.065533333 |
| ETV4         | 0.162033333  | 0.255033333  | 0.571        | 0.0655       | 0.107433333  |
| UGP2         | 0.2295       | 0.107866667  | 0.3271       | -0.100766667 | 0.104866667  |
| ZSWIM7       | 0.032666667  | 0.036966667  | 0.127466667  | -0.147333333 | -0.284633333 |
| IRS2         | 0.184766667  | -0.004466667 | -0.190333333 | -0.214266667 | -0.283833333 |
| PEX6         | 0.008166667  | 0.148566667  | 0.201133333  | -0.1742      | -0.0631      |
| PRAGMIN      | 0.0055       | 0.1547       | -0.0588      | -0.178933333 | -0.137266667 |
| TOMM5        | 0.349633333  | 0.257433333  | 0.0747       | 0.0564       | -0.094433333 |
| C11orf48     | 0.4669       | 0.139666667  | 0.176366667  | 0.171133333  | -0.011566667 |
| PRKAB1       | 0.324633333  | -0.011333333 | -0.046333333 | -0.002733333 | -0.332366667 |
| LOC730432    | -0.106666667 | -0.171333333 | 0.200766667  | -0.357       | -0.110933333 |
| ANP32A       | 0.028366667  | 0.3252       | 0.062566667  | -0.136333333 | 0.044533333  |

|              |              |              |              |              |              |
|--------------|--------------|--------------|--------------|--------------|--------------|
| PIP5K1C      | 0.087933333  | 0.0004       | 0.071        | -0.213366667 | -0.192433333 |
| PHF23        | -0.046566667 | 0.210066667  | 0.1732       | -0.223466667 | -0.1748      |
| LOC646821    | 0.3621       | 0.303766667  | -0.074366667 | 0.0061       | -0.053466667 |
| PPP1R3F      | -0.088433333 | 0.0501       | 0.185566667  | -0.2634      | -0.330066667 |
| LOC728572    | -0.303733333 | 0.295033333  | -0.0192      | -0.286966667 | -0.1977      |
| FLJ23584     | -0.038333333 | 0.066033333  | 0.048133333  | -0.2401      | -0.2705      |
| ATP13A2      | 0.146766667  | 0.1667       | 0.165766667  | -0.124       | -0.011833333 |
| ASB9         | 0.087366667  | 0.339266667  | 0.4467       | -0.036366667 | 0.098566667  |
| DLX1         | 0.395733333  | 0.1148       | 0.258066667  | 0.1777       | -0.0951      |
| NPC2         | 0.0913       | 0.130466667  | 0.264866667  | -0.128633333 | -0.046       |
| LOC100131261 | -0.228833333 | 0.141033333  | 0.124666667  | -0.240166667 | -0.076766667 |
| LOC648740    | -0.146333333 | 0.3866       | -0.2404      | -0.322133333 | 0.029333333  |
| SRD5A1       | 0.003166667  | 0.1485       | 0.212033333  | -0.074966667 | -0.1247      |
| BBS2         | -0.549533333 | 0.121666667  | 0.185233333  | -0.6652      | -0.283333333 |
| CTDSP2       | 0.3843       | 0.220933333  | 0.0243       | 0.0683       | -0.126       |
| SLIT2        | 0.392533333  | 0.1668       | 0.0628       | 0.036366667  | -0.087133333 |
| ZNF837       | -0.0564      | 0.1241       | 0.2091       | -0.278033333 | -0.054533333 |
| AMY1A        | 0.0035       | 0.358266667  | -0.144433333 | -0.268233333 | 0.092966667  |
| AP2B1        | 0.232366667  | 0.101033333  | 0.1558       | -0.070433333 | -0.155166667 |
| FLJ10081     | 0.136733333  | -0.026       | 0.131466667  | -0.155       | -0.3226      |
| ZNF613       | 0.0073       | 0.151533333  | -0.052666667 | -0.307733333 | -0.1902      |
| RAB13        | -0.0352      | -0.036566667 | 0.642566667  | -0.129966667 | 0.042433333  |
| SHMT1        | -0.0316      | 0.1415       | 0.324566667  | -0.2662      | -0.089933333 |
| OSBPL10      | 0.287566667  | -0.062466667 | 0.061833333  | -0.110733333 | -0.174666667 |
| GATAD2B      | 0.266966667  | 0.050433333  | 0.230933333  | 0.015033333  | -0.235366667 |
| LOC100131672 | -0.356366667 | 0.281533333  | -0.230066667 | -0.5068      | -0.083333333 |
| CPN1         | 0.0298       | 0.186933333  | 0.637633333  | -0.223666667 | -0.007833333 |
| ICA1         | -0.318633333 | 0.067        | 0.4889       | -0.314066667 | -0.1223      |
| TP53         | 0.1044       | -0.007766667 | 0.1373       | -0.164933333 | -0.2178      |
| SYT11        | -0.2345      | 0.0816       | 0.2171       | -0.393266667 | -0.1495      |
| SLC27A3      | -0.070633333 | 0.0597       | 0.3409       | -0.267666667 | -0.122133333 |
| XPO4         | 0.301        | 0.370466667  | 0.055        | 0.015833333  | -0.026866667 |
| KIAA0513     | 0.1288       | -0.0082      | 0.349133333  | -0.036866667 | -0.1496      |
| IPO9         | 0.295133333  | 0.1417       | 0.3191       | 0.019766667  | -0.052966667 |
| LOC643779    | -0.549733333 | 0.236833333  | -0.420966667 | -0.7037      | -0.074033333 |
| U2AF1L4      | -0.030866667 | 0.1049       | 0.069666667  | -0.2384      | -0.104733333 |
| PLEKHA1      | -0.031733333 | -0.2653      | 0.106433333  | -0.365166667 | -0.278066667 |
| LOC338758    | 0.076566667  | 0.143633333  | 0.0102       | -0.091       | -0.201833333 |
| PRRT3        | -0.065933333 | 0.0215       | 0.2076       | -0.228966667 | -0.162866667 |
| ITGB3BP      | 0.1879       | 0.279        | 0.157233333  | -0.122066667 | 0.0342       |
| ZNF197       | 0.151466667  | 0.0352       | 0.0352       | -0.172433333 | -0.158266667 |
| MAGEH1       | 0.230766667  | 0.2579       | 0.046033333  | -0.034333333 | -0.0868      |
| ZFYVE19      | 0.0553       | 0.016533333  | 0.139        | -0.185366667 | -0.2509      |
| SLC39A11     | -0.421633333 | 0.0315       | -0.125466667 | -0.674833333 | -0.315133333 |
| KIF13B       | -0.1159      | 0.070033333  | 0.237933333  | -0.328733333 | -0.117366667 |
| ACSL3        | 0.094933333  | 0.168633333  | 0.7312       | -0.021       | 0.0024       |
| HSD17B7      | 0.098266667  | 0.8309       | 0.0388       | -0.038433333 | 0.071966667  |

|              |              |              |              |              |              |
|--------------|--------------|--------------|--------------|--------------|--------------|
| CAMK4        | 0.285333333  | 0.263266667  | 0.140366667  | -0.0798      | 0.0592       |
| LOC644037    | -0.168133333 | 0.484133333  | -0.230333333 | -0.283833333 | -0.037233333 |
| LOC401152    | -0.200766667 | 0.2264       | 0.4631       | -0.202833333 | 0.043366667  |
| CNTNAP3B     | -0.124233333 | 0.274866667  | 0.191066667  | -0.346833333 | -0.133666667 |
| PPM1E        | -0.018566667 | 0.1933       | 0.1859       | -0.1979      | -0.0841      |
| CCDC28B      | -0.376866667 | -0.0551      | 0.416033333  | -0.574066667 | -0.077566667 |
| MED12        | 0.0026       | 0.146633333  | 0.297133333  | -0.155766667 | -0.1639      |
| LRP5         | 0.126        | 0.095266667  | 0.4545       | -0.154166667 | -0.080333333 |
| UBAP1        | 0.160433333  | 0.0306       | 0.160066667  | -0.110866667 | -0.2709      |
| REEP2        | -0.2315      | 0.164933333  | 0.426933333  | -0.328       | -0.062566667 |
| LOC100134073 | 0.5763       | 0.088        | -0.1764      | -0.178733333 | -0.091833333 |
| C1orf86      | 0.0415       | 0.2914       | 0.266566667  | -0.263133333 | 0.049233333  |
| MBD3         | 0.2733       | 0.171633333  | 0.1606       | -0.0338      | -0.1071      |
| USP48        | 0.0657       | 0.185733333  | 0.211633333  | -0.190966667 | -0.031433333 |
| MLF2         | 0.193233333  | 0.036866667  | 0.192866667  | -0.070633333 | -0.154733333 |
| RDX          | 0.155066667  | -0.097733333 | 0.204866667  | -0.273966667 | -0.108833333 |
| GDA          | 0.369466667  | 0.513066667  | -0.0536      | 0.1654       | 0.079        |
| CADPS2       | -0.1268      | 0.0867       | 0.1937       | -0.4364      | -0.1335      |
| IFITM3       | -0.3002      | -0.0873      | 0.529433333  | -0.3859      | -0.231033333 |
| ZNF788       | 0.379566667  | 0.359733333  | 0.029266667  | 0.039533333  | 0.030666667  |
| LOC727962    | -0.2157      | 0.8988       | -0.049566667 | -0.213533333 | -0.0802      |
| CARHSP1      | 0.0772       | 0.102466667  | 0.393833333  | -0.085233333 | -0.083333333 |
| PXMP2        | 0.236133333  | -0.1364      | 0.3357       | -0.1839      | -0.126666667 |
| RRAGA        | 0.0171       | 0.055966667  | 0.2068       | -0.309266667 | -0.058533333 |
| DCAF10       | -0.1977      | 0.0775       | 0.272433333  | -0.332366667 | -0.210066667 |
| FAM113A      | -0.091566667 | 0.018566667  | 0.2453       | -0.329933333 | -0.223433333 |
| LOC730534    | 0.315233333  | 0.259533333  | 0.043866667  | -0.0045      | -0.058466667 |
| PIGM         | -0.012566667 | 0.1126       | 0.0546       | -0.313966667 | -0.1451      |
| FZD9         | 0.001133333  | 0.094566667  | 0.296933333  | -0.377966667 | -0.045233333 |
| C15orf38     | 0.101166667  | 0.0446       | 0.0993       | -0.24        | -0.244166667 |
| ABCB1        | 0.3563       | 0.096966667  | 0.088066667  | -0.018333333 | -0.029566667 |
| TFIP11       | 0.171366667  | 0.457033333  | 0.1084       | -0.0159      | -0.0379      |
| AHR          | -0.023166667 | 0.685366667  | -0.0194      | -0.2697      | 0.053733333  |
| LOC100129645 | 0.0791       | 0.203633333  | 0.190233333  | -0.086166667 | -0.055366667 |
| NCAPD2       | 0.279266667  | 0.292966667  | 0.236        | 0.0296       | 0.0141       |
| IFT52        | 0.033166667  | 0.028066667  | 0.000333333  | -0.223033333 | -0.162433333 |
| ZNF627       | -0.3647      | -0.109366667 | 0.3041       | -0.4488      | -0.406766667 |
| ATP5I        | 0.1783       | 0.053533333  | 0.110566667  | -0.196       | -0.1987      |
| CENPJ        | 0.376766667  | 0.355666667  | 0.033066667  | -0.038666667 | -0.0354      |
| SSRP1        | 0.265966667  | 0.426066667  | 0.030666667  | 0.0127       | 0.132        |
| ST13         | -0.162       | -0.147066667 | 0.198533333  | -0.513133333 | -0.145533333 |
| GON4L        | 0.2136       | 0.181466667  | 0.0766       | -0.047033333 | -0.161433333 |
| CEBPD        | -0.1294      | -0.2158      | 0.322833333  | -0.151633333 | -0.4489      |
| CCNG1        | -0.047633333 | 0.185866667  | 0.2703       | -0.115       | -0.071366667 |
| LOC100129599 | -0.150966667 | 0.1381       | 0.0837       | -0.242533333 | -0.240033333 |
| NUP160       | 0.286033333  | 0.1924       | 0.3375       | 0.034566667  | -0.0627      |
| PLDN         | 0.007533333  | 0.787033333  | -0.020966667 | -0.1781      | 0.0386       |



|              |              |              |              |              |              |
|--------------|--------------|--------------|--------------|--------------|--------------|
| AOF2         | 0.197466667  | 0.1764       | 0.2275       | -0.041733333 | -0.088166667 |
| CHST14       | 0.310533333  | 0.066233333  | 0.0858       | 0.0008       | -0.2241      |
| LOC728820    | -0.153833333 | -0.0062      | 0.144366667  | -0.3656      | -0.203866667 |
| SMYD2        | 0.2751       | 0.3573       | 0.120833333  | 0.1303       | -0.088533333 |
| SNORA76      | 0.361633333  | 0.1224       | 0.1041       | -0.016966667 | -0.1703      |
| GLCE         | 0.104933333  | 0.1129       | 0.329533333  | -0.192366667 | -0.125033333 |
| SNX13        | -0.258066667 | 0.116866667  | 0.156133333  | -0.417533333 | -0.237433333 |
| SPHAR        | -0.012733333 | 0.029766667  | -0.0193      | -0.3506      | -0.233666667 |
| TMEM179B     | -0.008266667 | -0.0352      | 0.2971       | -0.214533333 | -0.087833333 |
| P2RY11       | 0.427        | 0.175        | 0.134166667  | 0.042566667  | -0.0549      |
| AKR1C2       | -0.749833333 | -0.038533333 | 0.440266667  | -0.976666667 | -0.237533333 |
| PDE4D        | 0.2696       | 0.071166667  | 0.135333333  | -0.241133333 | -0.162666667 |
| SEC11A       | 0.0232       | 0.134266667  | 0.1866       | -0.151833333 | -0.251433333 |
| LOC643949    | -0.265433333 | 0.1631       | 0.0414       | -0.3853      | -0.2032      |
| HOXC13       | -0.072466667 | 0.321566667  | 0.039        | -0.239466667 | -0.250566667 |
| LOC100133773 | -0.354766667 | 0.427066667  | -0.459566667 | -0.4861      | -0.0484      |
| C10orf114    | 0.075133333  | 0.279        | 0.155466667  | -0.122533333 | -0.152366667 |
| ZNF786       | 0.068533333  | 0.817833333  | -0.0278      | -0.150666667 | 0.074433333  |
| USP24        | 0.185566667  | 0.174733333  | 0.200733333  | -0.1356      | -0.167366667 |
| B9D2         | 0.0881       | 0.305333333  | 0.0886       | -0.033066667 | -0.093533333 |
| NENF         | 0.075833333  | -0.003233333 | 0.177433333  | -0.201       | -0.2209      |
| RASA1        | 0.087633333  | 0.0876       | 0.3582       | -0.256       | 0.0694       |
| FAM179B      | 0.075233333  | -0.0971      | -0.0242      | -0.2328      | -0.287833333 |
| MXD3         | 0.1004       | 0.250533333  | 0.235766667  | -0.125933333 | -0.0286      |
| SPA17        | -0.106633333 | 0.274466667  | 0.233466667  | -0.284733333 | -0.0764      |
| BAGE4        | 0.4474       | 0.147433333  | 0.030333333  | -0.061433333 | -0.048566667 |
| GSN          | -0.0421      | -0.0824      | 0.5312       | -0.3771      | -0.147633333 |
| FAM117B      | -0.062866667 | -0.0961      | 0.184633333  | -0.3885      | -0.1276      |
| SLC38A2      | -0.300433333 | -0.074333333 | 0.184566667  | -0.433233333 | -0.1536      |
| RDH13        | 0.383766667  | 0.219866667  | 0.1164       | 0.040666667  | -0.065366667 |
| HOXC6        | -0.209966667 | 0.0823       | 0.195633333  | -0.3788      | -0.2833      |
| DHX34        | 0.340233333  | 0.392133333  | 0.0755       | 0.017        | 0.086233333  |
| DPY19L4      | 0.0252       | -0.031933333 | 0.300933333  | -0.314766667 | -0.071633333 |
| CRIPAK       | 0.3306       | -0.082466667 | 0.179366667  | -0.172633333 | -0.2198      |
| NLRP11       | 0.200333333  | 0.322266667  | 0.0813       | -0.1008      | -0.156166667 |
| FGF13        | 0.474966667  | 0.220433333  | 0.230966667  | -0.0487      | 0.125833333  |
| SLC25A23     | -0.1661      | 0.016066667  | 0.480866667  | -0.321333333 | -0.1527      |
| C12orf62     | -0.062866667 | 0.085833333  | -0.0076      | -0.358533333 | -0.148833333 |
| GDAP1        | 0.0707       | 0.094133333  | 0.1438       | -0.199033333 | -0.211966667 |
| MCM8         | 0.379033333  | 0.335633333  | 0.1658       | -0.067733333 | 0.022433333  |
| PRMT6        | 0.343033333  | -0.003733333 | 0.165433333  | -0.033       | 0.003933333  |
| BRD3         | -0.041133333 | 0.0482       | 0.143366667  | -0.348       | -0.1513      |
| MEIS3P1      | -0.069533333 | 0.0632       | 0.425466667  | -0.272       | -0.078266667 |
| FZD4         | 0.359066667  | -0.002266667 | 0.0321       | -0.091266667 | -0.1678      |
| 8-Sep        | 0.145166667  | -0.050033333 | 0.1397       | -0.230433333 | -0.1233      |
| H2AFY2       | 0.001        | -0.0604      | 0.261933333  | -0.319133333 | -0.161       |
| CHCHD3       | 0.278        | 0.292966667  | 0.073833333  | 0.030533333  | 0.0153       |

|           |              |              |              |              |              |
|-----------|--------------|--------------|--------------|--------------|--------------|
| CNOT3     | 0.335366667  | 0.130133333  | 0.157266667  | 0.0093       | -0.245233333 |
| LOC646527 | -0.4359      | 0.150866667  | -0.037466667 | -0.445833333 | -0.338066667 |
| FOS       | 0.016133333  | -0.3652      | 0.148733333  | -0.112766667 | -0.347666667 |
| MFAP2     | -0.025166667 | 0.2796       | 0.4746       | -0.138566667 | -0.0577      |
| LOC644591 | 0.053266667  | 0.502666667  | -0.020433333 | -0.015533333 | -0.1489      |
| PKM2      | 0.263533333  | 0.1426       | 0.567366667  | 0.025833333  | -0.083533333 |
| DBI       | -0.025633333 | 0.058833333  | 0.143633333  | -0.308966667 | -0.219233333 |
| SERPINH1  | 0.1114       | 0.098633333  | 0.333266667  | -0.103       | -0.036766667 |
| CLK2      | 0.221066667  | 0.141766667  | 0.196733333  | -0.0959      | -0.1993      |
| FBL       | 0.284133333  | 0.255166667  | 0.205266667  | -0.008833333 | -0.025066667 |
| ALDH7A1   | -0.005866667 | -0.060066667 | 0.1909       | -0.362533333 | -0.2334      |
| CHST1     | -0.097033333 | -0.010366667 | 0.158433333  | -0.531266667 | -0.2032      |
| ERBB2     | -0.1892      | -0.058366667 | 0.298766667  | -0.3356      | -0.349666667 |
| ZNF358    | -0.192733333 | 0.084933333  | 0.281733333  | -0.4239      | -0.155133333 |
| LOC642738 | -0.287633333 | 0.477833333  | -0.427866667 | -0.518333333 | 0.135433333  |
| BACE1     | 0.036666667  | 0.118666667  | 0.227166667  | -0.1819      | -0.2245      |
| CARKD     | 0.207566667  | -0.009933333 | -0.081333333 | -0.048       | -0.4187      |
| RUVBL2    | 0.206433333  | 0.1126       | 0.2273       | -0.193133333 | -0.0207      |
| RPAP1     | 0.2337       | 0.1771       | 0.192166667  | -0.063633333 | -0.0958      |
| ZNF18     | -0.036733333 | -0.012733333 | -0.008633333 | -0.396766667 | -0.273933333 |
| LOC347376 | 0.0235       | 0.204933333  | 0.161166667  | -0.1933      | -0.1         |
| LOC647285 | -0.122533333 | 0.076633333  | 0.333466667  | -0.2203      | -0.268166667 |
| DIXDC1    | 0.077133333  | 0.118633333  | 0.4201       | -0.255866667 | 0.002833333  |
| HUWE1     | 0.048766667  | 0.039566667  | 0.2671       | -0.0952      | -0.318566667 |
| GINS2     | 0.709266667  | 0.2211       | -0.008133333 | 0.152333333  | -0.025833333 |
| H1FX      | 0.1099       | 0.1569       | 0.186        | 0.026366667  | -0.164066667 |
| BHLHB9    | -0.025066667 | 0.172066667  | 0.048333333  | -0.279666667 | -0.286266667 |
| SLC30A9   | -0.0966      | 0.038        | 0.195133333  | -0.4276      | -0.134366667 |
| ADO       | 0.1284       | 0.174333333  | 0.0331       | -0.163066667 | -0.109333333 |
| PIGO      | 0.133833333  | 0.096366667  | 0.172333333  | -0.120466667 | -0.180566667 |
| CEBPG     | 0.0605       | 0.032666667  | -0.231266667 | -0.268866667 | -0.3623      |
| UBAP2L    | -0.1981      | 0.0819       | 0.2981       | -0.368133333 | -0.245966667 |
| CHD8      | 0.085533333  | 0.129066667  | 0.212866667  | -0.184766667 | -0.100366667 |
| LOC402057 | -0.351266667 | 0.380933333  | -0.441666667 | -0.510833333 | -0.1341      |
| PCNX      | 0.043366667  | 0.159633333  | 0.323766667  | -0.1334      | -0.1577      |
| LGALS1    | 0.0953       | -0.073233333 | 0.334466667  | -0.268933333 | -0.174433333 |
| CELSR2    | 0.034933333  | 0.021233333  | 0.2385       | -0.2762      | -0.239933333 |
| NME1-NME2 | 0.231566667  | 0.153766667  | 0.212233333  | -0.014433333 | -0.118866667 |
| LOC729120 | 0.031633333  | 0.614866667  | 0.075566667  | -0.168266667 | 0.036466667  |
| PSME1     | -0.0788      | -0.007066667 | 0.3513       | -0.223066667 | -0.321966667 |
| SLC1A4    | -0.059833333 | -0.133533333 | -0.219233333 | -0.4891      | -0.302533333 |
| RNU6-15   | 0.033        | 0.196033333  | 0.356466667  | -0.061633333 | 0.001933333  |
| TRAPPC2P1 | 0.1586       | 0.0797       | 0.1064       | -0.110466667 | -0.133666667 |
| C20orf11  | 0.0491       | 0.037133333  | -0.066266667 | -0.276433333 | -0.251566667 |
| KIAA0913  | -0.074166667 | 0.0101       | 0.2031       | -0.361166667 | -0.3191      |
| SLC35A2   | 0.0622       | 0.1864       | 0.072666667  | -0.2124      | -0.046733333 |
| TMEM120A  | 0.0223       | 0.031366667  | 0.381433333  | -0.121166667 | -0.193033333 |

|           |              |              |              |              |              |
|-----------|--------------|--------------|--------------|--------------|--------------|
| ZDHC14    | 0.0055       | 0.122566667  | 0.461266667  | -0.251233333 | 0.0215       |
| UGT8      | 0.428533333  | 0.1934       | -0.030166667 | 0.0575       | -0.098833333 |
| WDR41     | -0.1148      | 0.063566667  | 0.080433333  | -0.343733333 | -0.255933333 |
| TMLHE     | -0.057033333 | 0.1261       | 0.179166667  | -0.2303      | -0.1384      |
| BCDIN3D   | 0.0905       | -0.124633333 | 0.210533333  | -0.222033333 | -0.155533333 |
| SEPHS1    | 0.457866667  | 0.2758       | 0.046866667  | 0.086866667  | -6.67E-05    |
| ALDH4A1   | -0.0363      | 0.077033333  | 0.266733333  | -0.242133333 | -0.1926      |
| IPO11     | 0.1928       | 0.2724       | 0.148633333  | -0.076       | -0.0199      |
| TGFBI     | 0.139366667  | 0.0361       | 0.453066667  | -0.079166667 | -0.105       |
| RIPK4     | 0.090733333  | 0.0668       | 0.038666667  | -0.13        | -0.247333333 |
| SCYL3     | -0.100033333 | 0.027633333  | 0.198333333  | -0.291066667 | -0.155333333 |
| DZIP1     | 0.059666667  | 0.122533333  | 0.275866667  | -0.147633333 | -0.180666667 |
| LEPREL2   | 0.190133333  | 0.203266667  | 0.2086       | -0.1208      | -0.079566667 |
| CALM3     | 0.306133333  | 0.1027       | 0.145333333  | -0.105066667 | -0.1227      |
| C17orf96  | 0.363666667  | -0.037466667 | 0.492333333  | 0.001733333  | -0.163933333 |
| MRPS12    | 0.562766667  | 0.122766667  | 0.341266667  | 0.039533333  | -0.002633333 |
| LOC402221 | 0.7333       | 0.306333333  | 0.104133333  | 0.245933333  | 0.009433333  |
| LOC644615 | -0.0714      | 0.1613       | 0.525533333  | -0.1866      | -0.093133333 |
| ZNF784    | 0.157533333  | 0.0974       | 0.0891       | -0.1717      | -0.164833333 |
| VPS37D    | -0.073033333 | -0.040433333 | 0.3986       | -0.2565      | -0.2641      |
| IRF3      | 0.191333333  | 0.217666667  | 0.245733333  | -0.113966667 | -0.034233333 |
| BIRC6     | -0.077266667 | 0.182566667  | 0.186        | -0.268366667 | -0.213466667 |
| ACSS1     | 0.069266667  | 0.162666667  | 0.0593       | -0.160133333 | -0.162933333 |
| LOC388789 | 0.0053       | -0.052       | 0.1727       | -0.3488      | -0.2717      |
| NCOR2     | -0.152       | 0.0337       | 0.584033333  | -0.290933333 | -0.161266667 |
| SNORD35B  | 0.4853       | 0.264233333  | 0.1526       | 0.054833333  | 0.124166667  |
| PPP1R12C  | 0.382466667  | 0.059933333  | 0.239666667  | 0.103        | -0.1056      |
| NMB       | 0.025533333  | 0.063033333  | 0.403533333  | -0.162866667 | -0.080033333 |
| NAP1L1    | -0.0469      | 0.331466667  | 0.0468       | -0.258733333 | 0.090366667  |
| PLCD3     | 0.157533333  | 0.034833333  | 0.0578       | -0.209066667 | -0.171866667 |
| ALDH1A3   | 0.364466667  | 0.1426       | 0.129133333  | -0.165566667 | 0.020933333  |
| LOC728640 | 0.4091       | 0.269933333  | 0.1238       | 0.097433333  | -0.0571      |
| LRRC49    | 0.043966667  | 0.154666667  | 0.252733333  | -0.152966667 | -0.041166667 |
| MUM1      | 0.019833333  | 0.098933333  | 0.103533333  | -0.341233333 | -0.100333333 |
| TMC6      | -0.109033333 | 0.121466667  | 0.467633333  | -0.234566667 | -0.073966667 |
| SLITRK5   | 0.012833333  | 0.083333333  | 0.242066667  | -0.263933333 | -0.103566667 |
| ZNF22     | 0.173366667  | 0.220033333  | 0.102833333  | -0.110733333 | -0.157333333 |
| SCAF1     | 0.2121       | 0.122733333  | 0.106833333  | -0.131933333 | -0.186166667 |
| DGAT1     | 0.0989       | 0.1019       | 0.2064       | -0.114833333 | -0.214533333 |
| ZNF302    | -0.015666667 | -0.200733333 | 0.063033333  | -0.496266667 | -0.106366667 |
| RNASEH2C  | 0.460366667  | 0.118        | 0.052733333  | 0.0549       | -0.070433333 |
| CCDC71    | 0.2251       | -0.0098      | 0.097633333  | -0.293066667 | -0.123333333 |
| TMEM166   | 0.4416       | 0.103033333  | -0.020866667 | 0.176133333  | -0.1109      |
| PLD3      | -0.1871      | 0.0359       | 0.440066667  | -0.2556      | -0.234633333 |
| SERTAD3   | 0.025533333  | 0.1683       | 0.279766667  | -0.190533333 | -0.1662      |
| LOC729208 | -0.150433333 | 0.192533333  | -0.093533333 | -0.354933333 | -0.060033333 |
| LOC642361 | 0.056933333  | 0.126733333  | 0.034333333  | -0.134666667 | -0.1656      |

|              |              |              |              |              |              |
|--------------|--------------|--------------|--------------|--------------|--------------|
| NDUFA2       | -0.0429      | 0.0191       | 0.263533333  | -0.265433333 | -0.258066667 |
| C16orf75     | 0.337033333  | 0.227        | 0.188066667  | -0.0508      | -0.103533333 |
| C5orf21      | -0.090233333 | 0.014366667  | -0.0246      | -0.411466667 | -0.263533333 |
| APEH         | -0.0988      | -0.013433333 | 0.4627       | -0.2761      | -0.264366667 |
| MEX3B        | 0.190433333  | 0.005533333  | 0.228633333  | -0.019       | -0.213933333 |
| SNORD76      | 0.224066667  | 0.4196       | 0.070733333  | 0.0284       | -0.0049      |
| GALNT10      | 0.1774       | 0.136566667  | 0.3167       | -0.037366667 | -0.0176      |
| HERC2        | 0.259633333  | 0.064133333  | 0.047166667  | -0.166333333 | -0.294766667 |
| C15orf29     | -0.083566667 | 0.086766667  | 0.271166667  | -0.255033333 | -0.121866667 |
| LOXL3        | 0.3353       | -0.079066667 | 0.3972       | 0.057366667  | -0.1819      |
| LOC100132324 | 0.1524       | 0.080933333  | 0.234533333  | -0.115566667 | -0.196566667 |
| FAM171A1     | 0.2737       | 0.3016       | 0.1982       | -0.0619      | -0.023533333 |
| RABAC1       | -0.100133333 | -0.0332      | 0.1393       | -0.325266667 | -0.401266667 |
| MTMR10       | 0.146166667  | 0.102833333  | -0.0098      | -0.262033333 | -0.175166667 |
| SMOX         | 0.0781       | -0.023166667 | 0.4164       | -0.227633333 | -0.254633333 |
| CTXN1        | 0.182933333  | -0.093833333 | 0.353966667  | -0.237866667 | -0.250766667 |
| FZD1         | 0.218533333  | 0.450966667  | 0.363766667  | -0.0691      | 0.01         |
| ZBTB5        | 0.094166667  | 0.2437       | 0.021733333  | -0.193966667 | -0.121866667 |
| ALG6         | -0.0233      | 0.215566667  | 0.128733333  | -0.286833333 | -0.081833333 |
| LOC100130764 | 0.141266667  | 0.790933333  | -0.100033333 | -0.027433333 | -0.112166667 |
| NUP62        | 0.44         | 0.212133333  | 0.2003       | 0.075933333  | 0.005466667  |
| SUOX         | -0.2391      | 0.120633333  | 0.2196       | -0.495566667 | -0.084233333 |
| LOC387763    | 0.1054       | 0.072266667  | 0.2556       | -0.084166667 | -0.257766667 |
| PYGB         | -0.036866667 | -0.153066667 | 0.318833333  | -0.490033333 | -0.340366667 |
| C1orf123     | 0.137133333  | 0.146266667  | -0.0411      | -0.271233333 | -0.2207      |
| C17orf49     | 0.021366667  | -0.081233333 | 0.176066667  | -0.251333333 | -0.256333333 |
| AIF1L        | -0.139466667 | -0.1247      | 0.116033333  | -0.351966667 | -0.320766667 |
| INTS8        | -0.062833333 | 0.2653       | 0.2359       | -0.2768      | -0.0705      |
| NTN4         | -0.1141      | -0.0845      | 0.238766667  | -0.3316      | -0.111866667 |
| ZFP30        | 0.247766667  | 0.1854       | 0.1593       | -0.0979      | -0.0929      |
| LOC729680    | 0.152333333  | -0.0637      | 0.163333333  | -0.1794      | -0.207933333 |
| SPRYD4       | 0.032133333  | 0.088466667  | 0.229133333  | -0.108833333 | -0.174366667 |
| SMG7         | 0.1373       | 0.0069       | 0.174433333  | -0.2281      | -0.257566667 |
| CDS1         | 0.243733333  | 0.081233333  | -0.0109      | -0.214033333 | -0.206533333 |
| LOC651816    | 0.728533333  | 0.243366667  | 0.138866667  | 0.152        | 0.072033333  |
| LSMD1        | -0.109366667 | 0.1528       | 0.2396       | -0.309966667 | -0.184066667 |
| TMSB15A      | 0.3124       | 0.3575       | 0.223533333  | 0.0948       | -0.0256      |
| TRMT5        | 0.376066667  | 0.1783       | 0.104633333  | -0.0364      | -0.0526      |
| TIMM8B       | -0.076233333 | 0.139033333  | 0.166        | -0.231433333 | -0.181966667 |
| RHPN2        | 0.273933333  | 0.160633333  | 0.605033333  | 0.105533333  | -0.134066667 |
| SLC25A10     | 0.053766667  | 0.068366667  | 0.076033333  | -0.327766667 | -0.0883      |
| HAGHL        | -0.1713      | 0.040033333  | 0.279433333  | -0.4835      | -0.255       |
| IPO4         | 0.345966667  | 0.243366667  | 0.1034       | 0.048633333  | -0.122666667 |
| GLTSCR1      | 0.323233333  | 0.054466667  | 0.035433333  | -0.073166667 | -0.250333333 |
| MLL4         | 0.3364       | 0.012366667  | 0.2169       | -0.0717      | -0.196766667 |
| UBQLN4       | 0.179766667  | 0.264133333  | 0.233733333  | -0.127433333 | -0.0917      |
| HDGFRP3      | 0.2277       | 0.030533333  | 0.211066667  | -0.0144      | -0.033833333 |

|              |              |              |              |              |              |
|--------------|--------------|--------------|--------------|--------------|--------------|
| LOC440957    | 0.143466667  | 0.1284       | 0.081833333  | -0.226233333 | -0.057666667 |
| IREB2        | 0.318033333  | 0.254533333  | 0.0623       | -0.0934      | -0.1332      |
| TMEM183B     | 0.173366667  | 0.115833333  | 0.1229       | -0.236433333 | -0.127933333 |
| ZNF146       | 0.328666667  | 0.2588       | 0.191166667  | 0.055733333  | -0.066433333 |
| LOC283755    | 0.027633333  | -0.054633333 | 0.4243       | -0.244033333 | -0.199933333 |
| H2AFX        | 0.509866667  | 0.278866667  | 0.1754       | 0.1583       | -0.152633333 |
| HMGB2        | 0.297633333  | 0.473966667  | 0.1944       | 0.241833333  | -0.083166667 |
| ITM2C        | -0.0948      | -0.011366667 | 0.4308       | -0.39        | -0.235866667 |
| ANTXR1       | -0.056666667 | -0.1492      | 0.4114       | -0.200266667 | -0.213233333 |
| LOC645323    | 0.022466667  | 0.0999       | 0.114333333  | -0.340266667 | -0.203166667 |
| GALC         | -0.140666667 | 0.101833333  | 0.165766667  | -0.371266667 | -0.2717      |
| LOC646966    | -0.429066667 | 0.2574       | -0.1668      | -0.509366667 | -0.265       |
| GNAI3        | 0.294733333  | 0.252633333  | 0.27         | -0.061733333 | 0.090433333  |
| C15orf44     | 0.407133333  | 0.366833333  | 0.078133333  | 0.106466667  | -0.085966667 |
| CPT2         | -0.191533333 | -0.0227      | 0.121        | -0.5183      | -0.265733333 |
| ALG11        | 0.034966667  | 0.0298       | 0.054433333  | -0.245433333 | -0.1033      |
| PCGF2        | 0.1278       | 0.333766667  | 0.348566667  | -0.166166667 | -0.017333333 |
| C9orf86      | 0.3995       | 0.191666667  | 0.055066667  | -0.064       | -0.0744      |
| LOC100128836 | -0.103366667 | 0.320366667  | -0.043033333 | -0.293433333 | -0.100733333 |
| EHBP1L1      | -0.005966667 | 0.275333333  | 0.492366667  | -0.268766667 | -0.1521      |
| LOC729505    | 0.066133333  | 0.344666667  | -0.052966667 | -0.1223      | -0.0691      |
| TK2          | -0.064133333 | 0.1908       | 0.194433333  | -0.2927      | -0.1419      |
| LOC440731    | 0.1771       | 0.241166667  | 0.224466667  | -0.1607      | -0.116166667 |
| FAM133B      | 0.2771       | 0.252466667  | 0.260566667  | 0.105966667  | -0.193233333 |
| MRPL53       | 0.052233333  | 0.0264       | 0.3595       | -0.2382      | -0.235166667 |
| LOC100134265 | 0.419866667  | 0.3136       | 0.0523       | -0.077       | -0.052833333 |
| SSFA2        | 0.136766667  | 0.231933333  | 0.277166667  | -0.1428      | -0.158       |
| SNHG7        | 0.434433333  | 0.086066667  | -0.170166667 | -0.035633333 | -0.428333333 |
| UGDH         | -0.043766667 | 0.188366667  | 0.2102       | -0.230766667 | -0.009766667 |
| CSAD         | -0.0405      | -0.007833333 | 0.1131       | -0.332333333 | -0.337366667 |
| STK40        | 0.058466667  | 0.0397       | 0.203433333  | -0.215766667 | -0.202766667 |
| SALL2        | 0.087833333  | 0.075866667  | 0.340733333  | -0.233166667 | -0.166033333 |
| HERC1        | 0.156733333  | -0.0139      | 0.182733333  | -0.217633333 | -0.2932      |
| SOD2         | 0.113233333  | 0.008166667  | 0.1797       | -0.012466667 | -0.221333333 |
| KIF15        | 0.1326       | 0.3708       | 0.351566667  | 0.011466667  | -0.0684      |
| ZNF608       | -0.111966667 | 0.2257       | 0.117733333  | -0.227       | -0.096033333 |
| HDHD3        | -0.0378      | 0.046566667  | 0.235733333  | -0.266966667 | -0.1855      |
| SNORA59A     | 0.0971       | 0.286833333  | 0.228        | -0.130033333 | -0.085166667 |
| LAMB1        | -0.0109      | 0.087133333  | 0.595833333  | -0.164366667 | -0.1585      |
| SAPS1        | 0.2419       | 0.279        | 0.167466667  | -0.0421      | -0.082833333 |
| PTK7         | -0.010866667 | 0.1096       | 0.2377       | -0.2378      | -0.115633333 |
| WNK4         | 0.096366667  | 0.435133333  | 1.235333333  | -0.146733333 | 0.3016       |
| MRPS6        | 0.0274       | 0.1373       | 0.417966667  | -0.2686      | -0.0154      |
| PTPN13       | -0.145533333 | 0.124266667  | 0.209533333  | -0.369933333 | -0.2062      |
| MTHFD1L      | 0.270166667  | 0.150333333  | -0.1093      | -0.140733333 | -0.211133333 |
| JOSD2        | 0.073166667  | -0.001533333 | 0.2523       | -0.271066667 | -0.1198      |
| ADARB1       | 0.2841       | 0.222966667  | 0.227733333  | -0.1534      | -0.1426      |

|           |              |              |              |              |              |
|-----------|--------------|--------------|--------------|--------------|--------------|
| C14orf149 | 0.323066667  | 0.149833333  | -0.2422      | -0.0584      | -0.1946      |
| ERC1      | 0.055966667  | 0.0678       | 0.233233333  | -0.245566667 | -0.240633333 |
| TP53I3    | -0.146666667 | 0.103466667  | 0.135066667  | -0.5161      | -0.168       |
| ACBD7     | 0.249366667  | 0.200133333  | 0.278166667  | 0.014766667  | -0.023933333 |
| PLEKHA5   | -0.034533333 | 0.395133333  | 0.326966667  | -0.204066667 | 0.0246       |
| RHOU      | -0.254433333 | -0.026266667 | 0.2795       | -0.422066667 | -0.31        |
| RPL13     | -0.053966667 | 0.141066667  | 0.284933333  | -0.187233333 | -0.239433333 |
| TMEM160   | 0.111566667  | 0.206033333  | 0.04         | -0.259533333 | -0.0124      |
| MKL2      | 0.024933333  | 0.0135       | 0.214233333  | -0.2224      | -0.1375      |
| SYNE2     | 0.090633333  | 0.0488       | 0.135766667  | -0.253166667 | -0.1638      |
| IL17D     | 0.059966667  | 0.108866667  | 0.2116       | -0.1484      | -0.2017      |
| RAVER2    | 0.0954       | 0.0631       | 0.303533333  | -0.176766667 | -0.1793      |
| GNAS      | 0.238633333  | -0.023133333 | 0.377766667  | -0.174633333 | -0.181266667 |
| TRIM9     | 0.002366667  | -0.102666667 | 0.429166667  | -0.353766667 | -0.1371      |
| TST       | -0.0331      | -0.0627      | 0.237733333  | -0.363266667 | -0.227766667 |
| APPL2     | -0.0933      | 0.168366667  | 0.014166667  | -0.323033333 | -0.360566667 |
| UGCGL1    | 0.010933333  | -0.1657      | 0.274066667  | -0.2771      | -0.381566667 |
| PHF20     | 0.420233333  | 0.1889       | 0.1287       | -0.074766667 | 0.076366667  |
| SPRY4     | 0.195133333  | 0.215266667  | 1.3002       | 0.169633333  | -0.044433333 |
| FAM105A   | 0.543733333  | 0.162733333  | 0.216833333  | 0.098866667  | -0.112533333 |
| XYLB      | 0.0592       | 0.128566667  | 0.153966667  | -0.3372      | -0.266666667 |
| C18orf10  | 0.294633333  | 0.1988       | 0.125566667  | -0.082866667 | -0.230133333 |
| CERK      | 0.124933333  | 0.1302       | 0.1478       | -0.143433333 | -0.171566667 |
| CPSF3     | 0.0576       | 0.273933333  | 0.124333333  | -0.1367      | -0.107333333 |
| C9orf127  | 0.010033333  | -0.048533333 | 0.356933333  | -0.309533333 | -0.191233333 |
| IPO13     | 0.123733333  | 0.140566667  | 0.1521       | -0.168166667 | -0.118933333 |
| STMN1     | 0.595933333  | 0.317133333  | 0.082833333  | 0.251366667  | -0.046333333 |
| KIAA1522  | 0.1056       | 0.064033333  | 0.2344       | -0.282466667 | -0.1807      |
| SPTAN1    | 0.0959       | -0.1367      | 0.237633333  | -0.301233333 | -0.397266667 |
| POLR1D    | 0.1727       | 0.040566667  | 0.315733333  | -0.104133333 | -0.180766667 |
| ATF4      | 0.004933333  | -0.0008      | -0.194933333 | -0.413533333 | -0.345533333 |
| CITED4    | 0.053933333  | 0.1193       | 0.722566667  | -0.201033333 | 0.031366667  |
| GPAA1     | 0.0247       | 0.110033333  | 0.318533333  | -0.1525      | -0.353666667 |
| ZBTB45    | 0.212066667  | 0.144633333  | 0.175466667  | -0.1892      | -0.1381      |
| CDC25B    | 0.067766667  | 0.094166667  | 0.306466667  | -0.245633333 | -0.133433333 |
| SMYD3     | -0.099266667 | 0.065233333  | 0.226366667  | -0.372366667 | -0.3105      |
| FUZ       | 0.1977       | 0.0942       | 0.1504       | -0.304866667 | -0.1113      |
| SPATA5L1  | 0.303133333  | 0.397733333  | 0.2695       | -0.034466667 | 0.015533333  |
| CAV1      | 0.450033333  | 0.473533333  | 0.0487       | 0.022766667  | 0.045133333  |
| CCDC72    | 0.204533333  | 0.203433333  | 0.2549       | -0.035133333 | -0.161733333 |
| LCMT2     | 0.4303       | 0.322        | 0.054266667  | -0.0168      | -0.051166667 |
| LOC400027 | 0.123566667  | 0.137033333  | 0.034266667  | -0.106266667 | -0.226266667 |
| CBLB      | 0.071533333  | -0.004933333 | 0.018166667  | -0.309466667 | -0.244066667 |
| PPP1R14C  | 0.285833333  | 0.2965       | 0.275833333  | -0.069233333 | 0.055766667  |
| SLC26A6   | 0.226633333  | 0.050466667  | 0.289833333  | -0.2703      | -0.121433333 |
| KIAA0430  | -0.1513      | 0.0673       | 0.1641       | -0.437266667 | -0.315866667 |
| ZNF615    | 0.143933333  | 0.1289       | 0.186566667  | -0.1408      | -0.150333333 |

|              |              |              |              |              |              |
|--------------|--------------|--------------|--------------|--------------|--------------|
| PMM1         | -0.3475      | 0.025233333  | 0.221        | -0.555133333 | -0.235333333 |
| ZNF614       | 0.1629       | 0.2448       | 0.313633333  | -0.0642      | -0.0091      |
| TMEM50B      | -0.034133333 | 0.097633333  | 0.412933333  | -0.281566667 | -0.078933333 |
| LRRC8D       | 0.010466667  | -0.0823      | 0.155866667  | -0.254133333 | -0.310966667 |
| FLJ20699     | 0.151466667  | 0.136633333  | 0.198266667  | -0.160233333 | -0.139366667 |
| LOC100131989 | -0.064133333 | 0.890533333  | -0.228533333 | -0.294366667 | 0.0122       |
| KIF4A        | 0.4452       | 0.212066667  | 0.173966667  | 0.0903       | -0.141133333 |
| LGALS3       | -0.4379      | 0.029966667  | 0.183066667  | -0.477066667 | -0.3549      |
| LOC400948    | -0.028366667 | 0.055333333  | 0.4044       | -0.3573      | -0.208666667 |
| TTC13        | 0.219766667  | 0.056833333  | 0.337266667  | -0.169       | -0.159833333 |
| C9orf23      | -0.193433333 | 0.0754       | 0.174766667  | -0.405266667 | -0.3086      |
| SLC47A1      | 0.376033333  | 0.003033333  | 0.2115       | -0.059266667 | -0.1626      |
| C9orf140     | 0.4942       | 0.2497       | 0.125366667  | 0.1844       | -0.072966667 |
| RAB4A        | 0.0125       | 0.136733333  | 0.1468       | -0.234966667 | -0.197133333 |
| MGC16169     | 0.028966667  | 0.031066667  | 0.206766667  | -0.3458      | -0.274633333 |
| MYPOP        | 0.096933333  | 0.1151       | 0.1565       | -0.235666667 | -0.210166667 |
| ZNF512       | 0.007233333  | 0.1862       | 0.131333333  | -0.325666667 | -0.044366667 |
| TRNT1        | 0.036333333  | 0.2632       | 0.234766667  | -0.336633333 | -0.008966667 |
| GTF2IP1      | 0.031766667  | 0.091866667  | 0.285833333  | -0.212033333 | -0.225733333 |
| LOC389049    | 0.717566667  | 0.318866667  | 0.018233333  | 0.173866667  | -0.081733333 |
| C14orf109    | 0.2454       | 0.160666667  | -0.0105      | -0.191766667 | -0.0993      |
| RAB4B        | 0.0228       | 0.037733333  | 0.244066667  | -0.196466667 | -0.192933333 |
| C9orf3       | 0.208733333  | 0.102966667  | 0.098166667  | -0.1631      | -0.161866667 |
| ELOVL6       | -0.0107      | 0.235166667  | 0.4344       | -0.3715      | -0.047133333 |
| TTC38        | 0.205066667  | 0.238266667  | 0.1744       | -0.106766667 | -0.1418      |
| ZNF274       | 0.052333333  | 0.260766667  | -0.077433333 | -0.3808      | -0.0647      |
| CTSF         | -0.0978      | 0.008966667  | 0.422666667  | -0.256466667 | -0.2778      |
| SNORA10      | 0.355866667  | 0.267133333  | 0.2968       | -0.042033333 | -0.003033333 |
| TCF3         | 0.457133333  | 0.2807       | 0.112033333  | -0.039566667 | 0.002566667  |
| SREBF1       | -0.365266667 | -0.135166667 | 0.597766667  | -0.483233333 | -0.401566667 |
| LOC644936    | 0.347933333  | 0.3803       | 0.0878       | 0.130366667  | -0.152366667 |
| LOC729859    | -0.185966667 | 0.0521       | 0.557033333  | -0.147033333 | -0.1126      |
| BCL2         | 0.447133333  | 0.248333333  | 0.016933333  | -0.041433333 | -0.122333333 |
| TSPAN33      | 0.006566667  | 0.115766667  | 0.092833333  | -0.316366667 | -0.038333333 |
| CENTG2       | 0.080466667  | 0.008333333  | 0.0668       | -0.415633333 | -0.2173      |
| CA5B         | 0.410066667  | 0.137266667  | 0.440866667  | -0.0438      | 0.0385       |
| RNU4ATAC     | 0.165133333  | 0.160333333  | 0.158433333  | -0.0735      | -0.086833333 |
| NQO1         | -0.034866667 | 0.4086       | 0.085933333  | -0.314766667 | 0.061833333  |
| FAT1         | 0.460633333  | -0.148666667 | 0.177466667  | -0.219233333 | -0.1503      |
| ERF          | 0.346233333  | 0.004166667  | 0.1864       | 0.006066667  | -0.3212      |
| LOC100130707 | 0.1804       | 0.0766       | 0.360566667  | -0.178666667 | -0.1359      |
| DHTKD1       | 0.408766667  | 0.348033333  | 0.172566667  | -0.0139      | -0.053266667 |
| FRMD8        | 0.256966667  | 0.102633333  | 0.175666667  | -0.194666667 | -0.122333333 |
| IVNS1ABP     | 0.224133333  | 0.3235       | 0.2904       | -0.035766667 | -0.096466667 |
| C8orf55      | 0.373733333  | 0.156266667  | 0.164533333  | -0.231566667 | -0.050466667 |
| ATP8B2       | -0.113233333 | 0.0072       | 0.303166667  | -0.466966667 | -0.278466667 |
| NPAS1        | 0.153833333  | -0.0204      | 0.232433333  | -0.2188      | -0.180666667 |

|              |              |              |              |              |              |
|--------------|--------------|--------------|--------------|--------------|--------------|
| N6AMT2       | 0.1454       | 0.336466667  | 0.239433333  | -0.176066667 | -0.103533333 |
| LOC100131713 | -0.694       | 0.1664       | 0.246266667  | -0.5973      | -0.2865      |
| USP5         | 0.105666667  | 0.057766667  | 0.274733333  | -0.181766667 | -0.171033333 |
| UBE2Q2       | 0.074833333  | 0.018733333  | 0.339766667  | -0.157       | -0.0835      |
| RNF38        | 0.3175       | 0.104866667  | 0.0788       | -0.076833333 | -0.2001      |
| N4BP2        | -0.091566667 | 0.818733333  | 0.044        | -0.248566667 | -0.035333333 |
| THBS3        | -0.2868      | 0.0356       | 0.408066667  | -0.467333333 | -0.3303      |
| TUBGCP2      | 0.249466667  | 0.058933333  | 0.255033333  | -0.1295      | -0.207233333 |
| PRDM1        | 0.370833333  | 0.343033333  | 0.397866667  | 0.217533333  | 0.115133333  |
| INTS4        | 0.071533333  | 0.194033333  | 0.235933333  | -0.214233333 | -0.0938      |
| NR2F1        | -0.0026      | 0.309166667  | 0.6023       | -0.268966667 | 0.074366667  |
| RFX7         | 0.093933333  | 0.207666667  | 0.286066667  | -0.131233333 | -0.1429      |
| ITFG2        | 0.630833333  | 0.3351       | -0.086966667 | 0.2002       | -0.021933333 |
| LOC100128274 | 0.1499       | 1.0486       | -0.252666667 | -0.093466667 | 0.0808       |
| SNORD32A     | 0.323166667  | 0.3973       | 0.095        | -0.038133333 | 0.0185       |
| LOC100134273 | -0.0974      | 0.3692       | 0.053033333  | -0.236166667 | -0.158933333 |
| PNKP         | -0.164033333 | 0.197433333  | 0.480766667  | -0.221366667 | -0.198666667 |
| PRC1         | 0.4596       | 0.097        | 0.1741       | 0.0468       | -0.1825      |
| LOC643438    | 0.4223       | 0.1379       | 0.2843       | -0.005333333 | -0.002133333 |
| GPX8         | -0.068766667 | 0.0279       | -0.073933333 | -0.508733333 | -0.292       |
| PHF19        | 0.4269       | 0.332133333  | 0.278966667  | 0.0138       | 0.068466667  |
| TMEM183A     | 0.1419       | 0.1659       | 0.0973       | -0.169333333 | -0.243566667 |
| TBX2         | 0.1862       | 0.241833333  | 0.444533333  | 0.0151       | -0.093366667 |
| SORBS2       | 0.1094       | -0.027666667 | 0.0039       | -0.370033333 | -0.179033333 |
| NLGN2        | -0.058833333 | 0.067466667  | 0.452166667  | -0.291       | -0.290533333 |
| ZFH3         | 0.092366667  | 0.077133333  | 0.056366667  | -0.222733333 | -0.3657      |
| ZNF30        | 0.3465       | 0.276566667  | 0.018633333  | -0.011566667 | -0.1177      |
| LOC100130070 | 0.001733333  | 0.036866667  | 0.165133333  | -0.310166667 | -0.095433333 |
| USF2         | 0.2397       | 0.135        | 0.376466667  | 0.040133333  | -0.172366667 |
| ABHD14B      | -0.0677      | 0.038933333  | 0.311233333  | -0.438133333 | -0.1802      |
| ACAA2        | -0.025466667 | 0.072933333  | 0.155666667  | -0.350433333 | -0.2211      |
| CORO2A       | 0.061933333  | 0.205566667  | 0.6302       | -0.116733333 | -0.0831      |
| VRK3         | -0.045233333 | -0.042433333 | 0.174833333  | -0.395933333 | -0.2498      |
| ABHD12       | 0.1421       | 0.222366667  | -0.0197      | -0.151233333 | -0.195366667 |
| ZNF532       | 0.270433333  | 0.245        | 0.239166667  | -0.119133333 | -0.1075      |
| AP2A1        | 0.040366667  | 0.1485       | 0.293433333  | -0.034433333 | -0.316666667 |
| AP3B1        | 0.056266667  | -0.0257      | 0.310766667  | -0.184133333 | -0.403666667 |
| GALNT2       | 0.196166667  | 0.1244       | 0.024433333  | -0.1989      | -0.1         |
| B3GNT1       | -0.0692      | 0.188        | 0.307633333  | -0.244333333 | -0.270466667 |
| TMEM108      | 0.2107       | 0.364266667  | 0.162266667  | -0.073633333 | -0.097433333 |
| LOC644914    | -0.215766667 | 0.2241       | 0.2017       | -0.308533333 | -0.149733333 |
| RPS23        | 0.025566667  | -0.0152      | 0.112966667  | -0.235566667 | -0.2912      |
| LOC100131940 | 0.3379       | 0.262433333  | 0.245066667  | -0.053033333 | -0.064866667 |
| FAM129A      | -0.3321      | -0.321933333 | -0.0247      | -0.573133333 | -0.6045      |
| SPPL2A       | -0.077       | 0.111633333  | 0.152233333  | -0.382866667 | -0.190933333 |
| LOC401847    | 0.136933333  | 0.108733333  | 0.257        | -0.1064      | -0.188666667 |
| CBWD5        | 0.136866667  | 0.295366667  | 0.1538       | -0.131866667 | 0.0106       |



|              |              |              |              |              |              |
|--------------|--------------|--------------|--------------|--------------|--------------|
| HLA-DQB1     | 0.1023       | 0.003666667  | 0.1812       | -0.254566667 | -0.153733333 |
| WVVOX        | 0.187433333  | 0.183533333  | 0.244033333  | -0.1459      | -0.0679      |
| SDHC         | 0.037733333  | 0.025333333  | 0.152666667  | -0.350866667 | -0.218966667 |
| SLC25A29     | 0.074233333  | 0.055366667  | 0.209133333  | -0.302133333 | -0.2642      |
| CTNNB1       | 0.586633333  | 0.224533333  | 0.2504       | 0.105933333  | -0.1009      |
| LOC729200    | 0.175466667  | 0.338366667  | 0.267966667  | -0.134433333 | 0.034133333  |
| LOC731049    | 0.668866667  | 0.188766667  | 0.150866667  | 0.093366667  | 0.028733333  |
| FAM156B      | 0.287366667  | 0.1582       | 0.1137       | -0.200666667 | -0.197033333 |
| RNF24        | -0.058766667 | 0.088766667  | 0.310333333  | -0.2763      | -0.286433333 |
| LOC100129685 | -0.250266667 | 0.463733333  | -0.187233333 | -0.4478      | -0.118533333 |
| SLC1A5       | 0.250333333  | 0.074333333  | 0.0528       | -0.178933333 | -0.2098      |
| HABP4        | 0.297533333  | 0.091866667  | 0.1049       | -0.124366667 | -0.173166667 |
| PCYOX1L      | -0.125233333 | 0.096666667  | 0.357633333  | -0.325133333 | -0.176       |
| FBXO46       | 0.1009       | 0.1245       | 0.167066667  | -0.191533333 | -0.2359      |
| ESYT1        | 0.0145       | 0.0606       | 0.2442       | -0.2971      | -0.276866667 |
| SNTB2        | 0.388        | 0.270166667  | 0.718833333  | -0.066766667 | 0.156066667  |
| ELL2         | 0.4048       | 0.123733333  | 0.227466667  | -0.067066667 | -0.035466667 |
| MED25        | 0.239066667  | 0.2787       | 0.3594       | -0.0672      | -0.093666667 |
| SNRPB2       | 0.4873       | 0.3046       | 0.355666667  | 0.079333333  | 0.063666667  |
| DOCK1        | 0.1713       | 0.124566667  | 0.2168       | -0.206533333 | -0.274233333 |
| LOC728877    | 0.110333333  | 0.2604       | 0.159033333  | -0.194666667 | -0.045733333 |
| IDH2         | 0.199966667  | -0.0924      | 0.140533333  | -0.247       | -0.4246      |
| DKAKD        | -0.104466667 | 0.054766667  | 0.321        | -0.383166667 | -0.1704      |
| TYRO3        | 0.3024       | 0.080133333  | 0.2816       | -0.037       | -0.220166667 |
| CYTSB        | 0.1831       | 0.158066667  | 0.060533333  | -0.218433333 | -0.136866667 |
| ISYNA1       | 0.017966667  | 0.093333333  | 0.5778       | -0.156733333 | -0.098066667 |
| SNORD80      | 0.268733333  | 0.521133333  | 0.0169       | -0.0203      | -0.033966667 |
| LOC100129882 | -0.0107      | 0.1407       | 0.031433333  | -0.387233333 | -0.2965      |
| PCCA         | -0.095166667 | 0.0973       | 0.3858       | -0.4111      | -0.185033333 |
| DAG1         | 0.004166667  | -0.052733333 | 0.255233333  | -0.279633333 | -0.461466667 |
| CIC          | 0.1095       | 0.112666667  | 0.202533333  | -0.294633333 | -0.212766667 |
| LOC729687    | 0.1745       | 0.752033333  | -0.1903      | -0.117       | 0.2572       |
| LOC727820    | -0.079133333 | 0.052066667  | 0.2685       | -0.195766667 | -0.302333333 |
| PYGO2        | -0.005433333 | -0.027       | 0.167933333  | -0.2168      | -0.434566667 |
| LOC149448    | 0.185766667  | 0.3323       | 0.110733333  | -0.123       | -0.2002      |
| MUS81        | 0.152133333  | 0.201633333  | -0.0348      | -0.177466667 | -0.284733333 |
| LYRM5        | -0.4078      | -0.1379      | 0.4719       | -0.576666667 | -0.1911      |
| LOC441775    | 0.1819       | 0.077833333  | 0.305466667  | -0.005666667 | -0.1912      |
| C19orf20     | 0.192933333  | -0.059233333 | 0.187        | -0.227766667 | -0.375       |
| PHF15        | 0.102366667  | 0.182433333  | 0.723966667  | -0.121933333 | 0.014966667  |
| SMARCC1      | 0.436766667  | 0.153366667  | 0.2093       | -0.0116      | -0.129866667 |
| ZNF446       | -0.1175      | 0.204766667  | 0.2864       | -0.360266667 | -0.176966667 |
| ZC3H4        | 0.199033333  | 0.200633333  | 0.458133333  | -0.082666667 | -0.087       |
| ALDH16A1     | 0.314433333  | 0.235166667  | 0.1613       | 0.033466667  | -0.228633333 |
| VEGFB        | -0.0523      | 0.041566667  | 0.250166667  | -0.373666667 | -0.292733333 |
| WIPF1        | 0.536633333  | 0.345333333  | 0.361266667  | 0.0784       | 0.097666667  |
| GPR161       | 0.305933333  | -0.025833333 | 0.3332       | -0.123766667 | -0.143166667 |

|              |              |              |              |              |              |
|--------------|--------------|--------------|--------------|--------------|--------------|
| TPM1         | 0.905533333  | 0.254233333  | -0.195733333 | 0.3984       | -0.0837      |
| HOXB5        | 0.105633333  | 0.257833333  | 0.4529       | -0.140066667 | -0.0918      |
| LOC642255    | 0.3611       | 0.265466667  | 0.246033333  | -0.0177      | -0.089266667 |
| ZNF395       | 0.142566667  | 0.101633333  | 0.3974       | -0.220966667 | -0.1941      |
| LMNB1        | 0.7182       | 0.304633333  | 0.235966667  | 0.157866667  | 0.041666667  |
| RPL14        | -0.123233333 | 0.226733333  | -0.081666667 | -0.357233333 | -0.199266667 |
| LOC402342    | 0.033766667  | 0.2345       | 0.104833333  | -0.255533333 | -0.0537      |
| MNS1         | 0.2857       | 0.302466667  | 0.177066667  | 0.0289       | -0.1048      |
| HMGB1        | 0.3154       | 0.4267       | 0.0428       | -0.025633333 | -0.0158      |
| PTPRG        | 0.125966667  | 0.2221       | 0.350666667  | -0.1297      | -0.119766667 |
| SUPT5H       | 0.270833333  | 0.270566667  | 0.2202       | 0.021266667  | -0.088566667 |
| EXOC4        | -0.085533333 | 0.0975       | 0.356666667  | -0.267033333 | -0.339866667 |
| CALM1        | 0.5607       | 0.193466667  | 0.162833333  | -0.0101      | -0.04        |
| COX6B1       | 0.164066667  | -0.0255      | 0.282166667  | -0.275233333 | -0.235033333 |
| BVES         | 0.0389       | 0.1246       | 0.279466667  | -0.249866667 | -0.1652      |
| TMEM136      | -0.137366667 | 0.055166667  | 0.1743       | -0.436633333 | -0.298466667 |
| TANC1        | -0.082266667 | -0.139066667 | 0.392066667  | -0.286833333 | -0.241966667 |
| SMO          | 0.133466667  | 0.0775       | 0.1941       | -0.225366667 | -0.238133333 |
| ITFG3        | 0.0451       | -0.115266667 | 0.456666667  | -0.3263      | -0.309933333 |
| LOC255783    | 0.202166667  | -0.074533333 | 0.248033333  | -0.234833333 | -0.292533333 |
| LOC729887    | 0.2411       | 0.009333333  | 0.125933333  | -0.217866667 | -0.136366667 |
| AQR          | 0.133133333  | 0.210866667  | 0.1606       | -0.2884      | -0.182366667 |
| LOC100133329 | -0.308833333 | 0.3866       | -0.2078      | -0.659466667 | 0.0459       |
| CALB2        | 0.544966667  | 0.435033333  | 0.076666667  | -0.1535      | 0.020433333  |
| RAP2A        | 0.259433333  | -0.301266667 | 0.164966667  | -0.282566667 | -0.1274      |
| PAK4         | 0.491733333  | 0.249066667  | 0.337733333  | -0.057       | 0.032966667  |
| ATAD1        | 0.199833333  | 0.221933333  | -0.023666667 | -0.1917      | -0.217033333 |
| MAP3K5       | 0.335333333  | 0.279233333  | 0.340433333  | -0.0118      | 0.000833333  |
| SFT2D2       | 0.0753       | 0.238766667  | 0.2252       | -0.2929      | -0.203266667 |
| ODZ3         | -0.157233333 | -0.067466667 | 0.078933333  | -0.3413      | -0.395066667 |
| ARHGAP18     | -0.076366667 | 0.135066667  | 0.286066667  | -0.3379      | -0.0891      |
| CLASP1       | 0.105033333  | 0.0728       | -0.073233333 | -0.2386      | -0.336966667 |
| PSMC4        | 0.345066667  | 0.218533333  | 0.2646       | 0.143766667  | -0.130533333 |
| DYNLT3       | -0.1505      | 0.1514       | 0.559933333  | -0.445       | -0.089933333 |
| ZNF573       | 0.096533333  | 0.242333333  | 0.177233333  | -0.1723      | -0.121966667 |
| CADM1        | 0.1307       | -0.063533333 | 0.134666667  | -0.0351      | -0.339733333 |
| MBOAT7       | 0.026366667  | 0.196766667  | 0.441166667  | -0.2142      | -0.175733333 |
| MAP1LC3A     | -0.252933333 | -0.135333333 | 0.583033333  | -0.559566667 | -0.2722      |
| CD24         | 0.4099       | 0.1719       | -0.1826      | -0.147166667 | -0.322266667 |
| AIM1         | 0.094966667  | 0.2332       | 0.1721       | -0.268633333 | -0.2205      |
| ALDH5A1      | 0.009166667  | 0.043466667  | 0.101666667  | -0.275433333 | -0.268633333 |
| CHES1        | 0.126433333  | 0.053533333  | 0.219066667  | -0.250666667 | -0.3273      |
| C17orf97     | -0.040133333 | -0.0195      | 0.039633333  | -0.395366667 | -0.3128      |
| GPR137       | 0.058666667  | 0.056866667  | 0.2352       | -0.342266667 | -0.257033333 |
| OBFC2B       | 0.3385       | 0.237233333  | 0.254733333  | -0.0106      | -0.0686      |
| ROBO1        | -0.036533333 | 0.0286       | 0.091566667  | -0.480566667 | -0.126033333 |
| TSHZ1        | 0.024833333  | 0.177933333  | 0.574366667  | -0.101966667 | -0.047733333 |

|              |              |              |              |              |              |
|--------------|--------------|--------------|--------------|--------------|--------------|
| JUND         | -0.010533333 | -0.132366667 | 0.187266667  | -0.348233333 | -0.397033333 |
| PDLIM3       | 0.253966667  | 0.1432       | 0.2006       | -0.1863      | -0.208866667 |
| LOC389599    | -0.028933333 | 0.116966667  | 0.219366667  | -0.3409      | -0.2388      |
| ZNF252       | 0.0607       | -0.0101      | 0.121        | -0.459366667 | -0.185066667 |
| TMTC2        | 0.0316       | 0.079633333  | 0.211733333  | -0.400266667 | -0.224933333 |
| SAE1         | 0.451166667  | 0.306766667  | 0.230833333  | 0.008766667  | -0.0973      |
| PTGR1        | -0.059033333 | 0.153833333  | 0.175266667  | -0.446833333 | -0.128666667 |
| RRAGB        | -0.064166667 | 0.0826       | 0.1038       | -0.334433333 | -0.2218      |
| U2AF2        | 0.749966667  | 0.2014       | 0.351566667  | 0.2324       | -0.082566667 |
| GNG2         | -0.0606      | 0.084466667  | 0.312066667  | -0.389433333 | -0.1761      |
| CGGBP1       | -0.014566667 | 0.316233333  | 0.2811       | -0.3044      | -0.132633333 |
| PAF1         | 0.245133333  | 0.2938       | 0.2516       | -0.1671      | -0.024433333 |
| LOC440928    | -0.074333333 | -0.0025      | 0.2588       | -0.3863      | -0.253666667 |
| SPSB2        | -0.086433333 | -0.0002      | 0.3646       | -0.4183      | -0.183566667 |
| UBXN2A       | 0.096        | 0.124833333  | 0.2037       | -0.162566667 | -0.2338      |
| PAM          | 0.0719       | -0.038133333 | 0.247366667  | -0.309266667 | -0.283633333 |
| ZNF579       | 0.0227       | 0.0575       | 0.301633333  | -0.201266667 | -0.343566667 |
| KLHDC2       | -0.166233333 | 0.113633333  | 0.208333333  | -0.5268      | -0.207866667 |
| AGPAT1       | 0.1748       | 0.082433333  | 0.307766667  | -0.282566667 | -0.2006      |
| LOC100127983 | 0.366933333  | 0.337133333  | 0.247933333  | -0.016466667 | -0.0188      |
| AK3          | -0.085466667 | -0.0942      | 0.2115       | -0.4141      | -0.322033333 |
| ZEB2         | 0.209666667  | 0.177266667  | 0.095366667  | -0.178       | -0.169533333 |
| LOC645683    | 0.1583       | 0.103933333  | 0.3298       | -0.1187      | -0.226066667 |
| C20orf108    | -0.130466667 | 0.1582       | 0.4267       | -0.3195      | -0.138533333 |
| LOC651575    | -0.294866667 | 0.083233333  | 0.5648       | -0.4843      | -0.180966667 |
| LOC100130943 | 0.2707       | 0.214433333  | 0.210266667  | -0.219166667 | -0.0088      |
| MAP3K1       | 0.089633333  | 0.229233333  | 0.3831       | -0.0633      | -0.069333333 |
| PRUNE        | 0.0763       | 0.1711       | 0.027333333  | -0.309233333 | -0.265766667 |
| JPH1         | 0.6382       | 0.077166667  | -0.005       | 0.031066667  | -0.202366667 |
| PIH1D1       | 0.123333333  | 0.161066667  | 0.4474       | -0.101766667 | -0.2562      |
| CCT5         | 0.271533333  | 0.4583       | 0.152866667  | -0.083733333 | -0.099966667 |
| AMACR        | 0.023633333  | 0.304433333  | 0.9535       | 0.0199       | -0.0575      |
| LOC100008589 | 0.755133333  | -0.146066667 | -0.076233333 | 0.165733333  | -0.2878      |
| UNC45A       | 0.145766667  | 0.053933333  | 0.247733333  | -0.393166667 | -0.092366667 |
| KCTD20       | 0.2976       | -0.096266667 | 0.2976       | -0.0916      | -0.250066667 |
| PKD2         | 0.0212       | -0.186766667 | 0.286266667  | -0.339766667 | -0.4176      |
| SAP18        | 0.009166667  | 0.170333333  | 0.0654       | -0.3036      | -0.258233333 |
| EMP3         | 0.405566667  | 0.156333333  | 0.250733333  | -0.120166667 | -0.113133333 |
| LSM14A       | 0.340566667  | 0.252833333  | 0.3021       | 0.000266667  | -0.1622      |
| SLC44A2      | -0.331733333 | -0.083333333 | 0.423166667  | -0.541666667 | -0.404433333 |
| C1orf53      | 0.0118       | 0.003366667  | 0.0676       | -0.360333333 | -0.293333333 |
| HACL1        | 0.089166667  | 0.1908       | 0.082233333  | -0.172433333 | -0.241933333 |
| LOC731314    | 0.487566667  | 0.2986       | 0.261433333  | -0.006366667 | -0.128233333 |
| CNFN         | 0.005333333  | -0.033066667 | 0.338133333  | -0.335       | -0.158666667 |
| DOCK2        | 0.2535       | 0.141033333  | 0.5585       | -0.105633333 | 0.0294       |
| ANKRD50      | 0.136766667  | -0.191633333 | 0.4592       | -0.578833333 | -0.109166667 |
| RAB20        | 0.358066667  | 0.1945       | 0.513033333  | 0.0525       | -0.1086      |

|              |              |              |              |              |              |
|--------------|--------------|--------------|--------------|--------------|--------------|
| LOC100130775 | -0.1759      | 0.206233333  | 0.109566667  | -0.5105      | -0.0045      |
| C14orf4      | -0.363566667 | -0.037033333 | 0.481966667  | -0.799733333 | -0.279133333 |
| KANK1        | 0.091366667  | 0.047266667  | 0.3602       | -0.2267      | -0.246566667 |
| S100A1       | 0.2807       | -0.160833333 | 0.215066667  | -0.1033      | -0.638033333 |
| SRP14        | 0.059233333  | 0.122633333  | 0.156266667  | -0.3578      | -0.091266667 |
| HSBP1        | 0.1299       | 0.1824       | 0.065233333  | -0.330233333 | -0.1381      |
| DHRS11       | -0.0585      | 0.118166667  | 0.369266667  | -0.374333333 | -0.1873      |
| RCAN3        | 0.095233333  | 0.222433333  | 0.2788       | -0.1699      | -0.175833333 |
| LOC730183    | 0.0618       | 0.309666667  | 0.204033333  | -0.169366667 | -0.1603      |
| RPS5         | 0.193033333  | 0.208766667  | 0.206233333  | -0.115866667 | -0.2095      |
| SYNC1        | -0.0178      | 0.248        | -0.102233333 | -0.270433333 | -0.250833333 |
| LOC100130775 | -0.045033333 | 0.062033333  | 0.586833333  | -0.3081      | -0.133533333 |
| C1orf122     | 0.1574       | 0.1468       | 0.183533333  | -0.225866667 | -0.2422      |
| AXL          | 0.333233333  | 0.446366667  | 0.2311       | 0.014066667  | -0.079433333 |
| SLC25A24     | 0.098633333  | 0.161433333  | 1.011433333  | -0.0923      | -0.1543      |
| KRT6B        | -0.025533333 | -0.096933333 | 0.2975       | -0.287533333 | -0.3718      |
| ZFP90        | -0.1937      | -0.070233333 | 0.0853       | -0.682733333 | -0.36        |
| LOC100131787 | -0.050366667 | 0.222166667  | 0.176866667  | -0.3718      | -0.1622      |
| RPL13A       | 0.0442       | 0.0754       | 0.260533333  | -0.2263      | -0.250166667 |
| DENND5B      | -0.148633333 | 0.1513       | 0.502566667  | -0.419366667 | -0.210666667 |
| MYLIP        | 0.026066667  | 0.166066667  | 0.359866667  | -0.186233333 | -0.340633333 |
| HLA-B        | 0.3286       | -0.2018      | -0.038533333 | -0.1177      | -0.313166667 |
| ZNF324       | 0.381066667  | 0.132633333  | 0.071533333  | -0.1599      | -0.213333333 |
| C19orf61     | 0.547033333  | 0.250266667  | 0.130566667  | 0.0302       | -0.215466667 |
| FLNA         | 0.311666667  | 0.2055       | 0.129266667  | -0.066566667 | -0.177266667 |
| AKT1S1       | 0.189166667  | 0.113666667  | 0.0907       | -0.235733333 | -0.267666667 |
| CSPG4        | 0.1114       | 0.255633333  | 0.782366667  | -0.298566667 | -0.082766667 |
| CUTL1        | 0.043133333  | 0.1643       | 0.422366667  | -0.3201      | -0.1385      |
| ATN1         | 0.226866667  | 0.1444       | 0.241133333  | -0.1917      | -0.2667      |
| ZNF671       | 0.1137       | 0.105        | 0.207766667  | -0.3416      | -0.067166667 |
| PRKD1        | -0.050266667 | 0.050933333  | 0.393933333  | -0.3671      | -0.1823      |
| HIST1H4K     | 0.147366667  | 0.401333333  | 0.2131       | -0.1619      | -0.076       |
| CLSTN1       | 0.0709       | -0.002266667 | 0.436666667  | -0.281033333 | -0.303833333 |
| TRAPPC5      | 0.235366667  | 0.104        | 0.3471       | -0.284166667 | -0.129033333 |
| SCARF2       | 0.318233333  | 0.291933333  | 0.395866667  | -0.066133333 | -0.02        |
| GNG11        | 0.239833333  | 0.376566667  | 0.302933333  | -0.129066667 | 0.003133333  |
| TARBP1       | 0.351633333  | 0.395933333  | 0.192766667  | -0.211033333 | -0.003833333 |
| ABCB6        | -0.0056      | 0.092266667  | 0.2003       | -0.4599      | -0.244033333 |
| C1orf24      | -0.191033333 | -0.185566667 | -0.1264      | -0.638233333 | -0.482133333 |
| RGL1         | -0.128033333 | -0.083866667 | 0.2419       | -0.4163      | -0.332466667 |
| C3orf10      | 0.145733333  | 0.1555       | 0.104366667  | -0.1655      | -0.249366667 |
| LOC441763    | 0.976933333  | 0.505033333  | -0.021133333 | 0.489533333  | -0.087266667 |
| BRP44L       | 0.167866667  | 0.264666667  | 0.238366667  | -0.234266667 | -0.1463      |
| LOC653219    | 0.177366667  | 0.071233333  | 0.238866667  | -0.303666667 | -0.275733333 |
| AEBP1        | 0.346366667  | -0.052066667 | 0.4498       | -0.206566667 | -0.200266667 |
| LPCAT3       | -0.1433      | 0.034966667  | 0.358666667  | -0.384266667 | -0.3056      |
| UGCGL2       | 0.181466667  | -0.067966667 | 0.222233333  | -0.2885      | -0.404333333 |

|           |              |              |             |              |              |
|-----------|--------------|--------------|-------------|--------------|--------------|
| SHROOM2   | 0.772833333  | 0.390266667  | 0.5096      | 0.1695       | 0.0692       |
| ETFB      | -0.053433333 | 0.0114       | 0.459733333 | -0.3404      | -0.281433333 |
| GPR126    | 0.135666667  | 0.149933333  | 0.418366667 | -0.034266667 | -0.2046      |
| CCDC92    | -0.091933333 | 0.125533333  | 0.270066667 | -0.385733333 | -0.301133333 |
| KCTD15    | 0.291933333  | 0.194666667  | 0.095966667 | -0.2282      | -0.314666667 |
| CDH2      | 0.3068       | -0.0195      | 0.348333333 | -0.062433333 | -0.134933333 |
| ITGB8     | 0.132366667  | 0.230066667  | 0.1212      | -0.2454      | -0.192566667 |
| ETHE1     | 0.264533333  | 0.225933333  | 0.2297      | -0.071033333 | -0.240033333 |
| CCDC85B   | -0.076133333 | -0.002466667 | 0.285366667 | -0.411833333 | -0.355033333 |
| HDHD2     | -0.1011      | 0.1802       | 0.1922      | -0.434966667 | -0.173166667 |
| SLC5A3    | 0.091033333  | 0.186666667  | 0.674866667 | -0.200833333 | -0.177066667 |
| EFNB2     | 0.665366667  | 0.188233333  | 0.085233333 | -0.041333333 | -0.124566667 |
| PPAPDC2   | 0.002633333  | -0.0005      | 0.140333333 | -0.364433333 | -0.269333333 |
| CYTH2     | 0.071066667  | 0.182033333  | 0.2392      | -0.3207      | -0.2536      |
| FNBP1L    | 0.0176       | -0.000633333 | 0.2921      | -0.393133333 | -0.193466667 |
| HIGD2A    | -0.202733333 | 0.1273       | 0.2805      | -0.438533333 | -0.2258      |
| UCRC      | 0.0979       | 0.244466667  | 0.126266667 | -0.252833333 | -0.215       |
| C20orf117 | 0.607833333  | 0.3077       | 0.339933333 | 0.1426       | -0.170333333 |
| ITGAV     | 0.0133       | 0.1106       | 0.350333333 | -0.235666667 | -0.2149      |
| PPM2C     | 0.038633333  | 0.173633333  | 0.124166667 | -0.464366667 | 0.103566667  |
| PC        | -0.024366667 | 0.0571       | 0.2989      | -0.4698      | -0.2787      |
| NOSIP     | 0.055866667  | 0.2558       | 0.198933333 | -0.3009      | -0.039233333 |
| LAGE3     | -0.1518      | 0.011566667  | 0.428966667 | -0.455066667 | -0.260266667 |
| HINT2     | -0.1023      | -0.005066667 | 0.008366667 | -0.358633333 | -0.450666667 |
| SERF2     | -0.055866667 | -0.064366667 | 0.519733333 | -0.4392      | -0.3185      |
| TCF7L2    | 0.115433333  | 0.220166667  | 0.315066667 | -0.289866667 | -0.205266667 |
| SNORA8    | 0.276        | 0.476866667  | 0.134366667 | -0.0869      | -0.048933333 |
| KDELR1    | 0.1203       | 0.222333333  | 0.385333333 | -0.219966667 | -0.184933333 |
| FAM89B    | -0.069866667 | 0.141433333  | 0.4559      | -0.484133333 | -0.216166667 |
| NASP      | 0.3606       | 0.495133333  | 0.3994      | -0.003366667 | 0.071666667  |
| LOXL4     | -0.770966667 | 0.265566667  | 1.750333333 | -0.604166667 | -0.2172      |
| KCNIP3    | 0.223566667  | 0.155066667  | 0.1099      | -0.158266667 | -0.249066667 |
| CXXC5     | -0.1469      | 0.060766667  | 0.670933333 | -0.2184      | -0.2418      |
| ING1      | 0.4362       | 0.3548       | 0.219066667 | 0.085233333  | -0.182733333 |
| WASPIP    | 0.631        | 0.414266667  | 0.46        | 0.1872       | 0.2049       |
| LOC442597 | 0.532866667  | 0.401933333  | 0.3659      | 0.0338       | 0.0303       |
| STAT2     | -0.189933333 | 0.063766667  | 0.365366667 | -0.687066667 | -0.2527      |
| XYLT1     | 0.269566667  | 0.1127       | 0.6472      | 0.108366667  | -0.112633333 |
| LOC729903 | 0.301333333  | 0.232966667  | 0.109733333 | -0.172633333 | -0.1789      |
| LOC730101 | 0.142333333  | 0.350366667  | 0.184066667 | -0.0774      | -0.211166667 |
| HSPBP1    | 0.4836       | 0.308066667  | 0.2011      | -0.008866667 | -0.036366667 |
| ZNF548    | 0.127566667  | 0.290833333  | 0.0833      | -0.402566667 | -0.1312      |
| ROPN1     | -0.048633333 | 0.049833333  | 0.420666667 | -0.2048      | -0.3743      |
| PLEKHO1   | 0.2264       | 0.145533333  | 0.245033333 | -0.110066667 | -0.3102      |
| CCDC23    | 0.2127       | 0.1274       | 0.085366667 | -0.272       | -0.224       |
| C1orf106  | 0.380266667  | 0.488566667  | 0.670733333 | 0.016366667  | 0.0712       |
| KIAA1967  | 0.378066667  | 0.356366667  | 0.104766667 | -0.161966667 | -0.117866667 |

|              |              |              |              |              |              |
|--------------|--------------|--------------|--------------|--------------|--------------|
| PPAPDC1A     | 0.363966667  | 0.2447       | -0.0323      | -0.246366667 | -0.221333333 |
| POP4         | 0.137166667  | 0.330633333  | 0.0969       | -0.2728      | -0.137966667 |
| C11orf71     | 0.0744       | 0.198566667  | 0.028433333  | -0.2976      | -0.2166      |
| SOBP         | -0.039966667 | 0.137733333  | 0.3252       | -0.4175      | -0.2898      |
| ZNF17        | 0.296566667  | 0.073666667  | 0.130833333  | -0.151633333 | -0.341366667 |
| PDCD5        | 0.609166667  | 0.3264       | 0.171066667  | 0.092433333  | -0.061933333 |
| FZD7         | 0.163733333  | 0.221933333  | 0.517233333  | -0.209866667 | -0.0276      |
| DSTN         | -0.083566667 | 0.0618       | 0.217333333  | -0.366933333 | -0.4103      |
| AP2S1        | 0.260566667  | 0.1671       | 0.1678       | -0.2674      | -0.1555      |
| SACS         | 0.667766667  | 0.3796       | 0.444366667  | 0.0911       | 0.0953       |
| BEND6        | -0.0646      | -0.0193      | 0.058433333  | -0.4777      | -0.4355      |
| UBA52        | 0.3808       | 0.271        | -0.079433333 | -0.044766667 | -0.141066667 |
| LRIG1        | 0.2228       | 0.097966667  | 0.214533333  | -0.248833333 | -0.2477      |
| DDR2         | -0.518433333 | -0.316666667 | -0.058866667 | -0.8719      | -0.821566667 |
| UBA2         | 0.409833333  | 0.4079       | 0.254466667  | -0.078833333 | -0.069133333 |
| ARHGEF1      | 0.4895       | 0.209833333  | 0.198566667  | 0.019333333  | -0.3102      |
| C11orf67     | 0.0632       | 0.1533       | 0.2779       | -0.313666667 | -0.1628      |
| BMP8B        | -0.025866667 | 0.655733333  | 0.1164       | -0.279766667 | 0.015866667  |
| LOC729255    | 0.172666667  | 0.409066667  | 0.072966667  | -0.224133333 | -0.014966667 |
| GRWD1        | 0.667733333  | 0.4452       | 0.2166       | 0.166233333  | 0.0656       |
| LOC497256    | 0.436366667  | 0.369        | 0.340733333  | 0.092833333  | -0.2205      |
| ASPM         | 0.241733333  | 0.402866667  | 0.485466667  | -0.027566667 | -0.044233333 |
| SRGN         | 0.0499       | 0.205533333  | 0.5142       | -0.206733333 | -0.2308      |
| EXTL1        | -0.027866667 | 0.235366667  | 0.653633333  | -0.377466667 | -0.125033333 |
| AGBL5        | -0.003733333 | 0.183066667  | 0.405        | -0.405066667 | -0.226333333 |
| C2orf79      | -0.0169      | 0.218066667  | 0.346166667  | -0.2553      | -0.1763      |
| PLCB1        | 0.013133333  | 0.019033333  | 0.259466667  | -0.557333333 | -0.205566667 |
| TMEM149      | 0.0193       | 0.0962       | 0.143733333  | -0.426433333 | -0.183766667 |
| CTSZ         | 0.014566667  | 0.055433333  | 0.620733333  | -0.2175      | -0.2296      |
| LOC147727    | 0.2118       | 0.182966667  | -0.148366667 | -0.202       | -0.330766667 |
| KIAA0495     | 0.189533333  | 0.191666667  | 0.197766667  | -0.256433333 | -0.256933333 |
| CYFIP1       | 0.2628       | 0.047833333  | 0.213566667  | -0.139933333 | -0.358266667 |
| ARV1         | 0.009366667  | 0.216633333  | 0.128566667  | -0.287933333 | -0.235933333 |
| ITPK1        | 0.412866667  | 0.220766667  | 0.211266667  | -0.087733333 | -0.1861      |
| BEX4         | -0.1639      | 0.025166667  | 0.2329       | -0.483466667 | -0.4061      |
| MGC18216     | 0.339033333  | 0.115066667  | 0.1135       | -0.0375      | -0.392666667 |
| CCPG1        | -0.120733333 | 0.0721       | 0.213033333  | -0.440966667 | -0.2698      |
| C19orf12     | 0.229533333  | 0.091133333  | 0.2973       | -0.161633333 | -0.2617      |
| BEXL1        | -0.211833333 | 0.109366667  | 0.030633333  | -0.499366667 | -0.381133333 |
| C9orf16      | -0.018366667 | 0.065166667  | 0.268833333  | -0.4239      | -0.327133333 |
| ID3          | -0.406266667 | 0.135266667  | 0.3198       | -0.8617      | -0.235366667 |
| HDAC4        | -0.001733333 | 0.358466667  | 0.3355       | -0.380966667 | -0.126733333 |
| LOC100128525 | -0.012766667 | 0.3852       | 0.1592       | -0.320233333 | -0.143       |
| SPHK2        | 0.219366667  | 0.225133333  | 0.143433333  | -0.2827      | -0.172433333 |
| LOC339352    | -0.1365      | 0.201        | 0.3539       | -0.2346      | -0.282733333 |
| LMO4         | -0.558533333 | -0.209366667 | -0.036       | -0.762766667 | -0.685433333 |
| STRADB       | -0.106866667 | 0.159833333  | 0.203833333  | -0.3726      | -0.376266667 |

|           |              |              |              |              |              |
|-----------|--------------|--------------|--------------|--------------|--------------|
| KIF20A    | 0.415766667  | 0.432333333  | 0.221866667  | -0.001933333 | -0.1426      |
| PRPF31    | 0.302933333  | 0.298966667  | 0.1773       | -0.055466667 | -0.261433333 |
| LOC728416 | 0.116133333  | 0.416033333  | 0.1895       | -0.307233333 | -0.1385      |
| TRIM28    | 0.546066667  | 0.300833333  | 0.255633333  | 0.1075       | -0.158366667 |
| RHBDF1    | -0.341633333 | 0.012866667  | 0.5321       | -0.690966667 | -0.4451      |
| IMPA2     | -0.0436      | 0.0187       | 0.233566667  | -0.665466667 | -0.265866667 |
| SLC44A1   | 0.114033333  | 0.0421       | 0.230966667  | -0.4058      | -0.299166667 |
| DYRK4     | 0.0172       | 0.185866667  | -0.011233333 | -0.3035      | -0.380766667 |
| PTEN      | 0.2912       | 0.2819       | 0.0626       | -0.247933333 | -0.2213      |
| ZSCAN5A   | 0.396966667  | 0.598333333  | 0.124866667  | 0.029466667  | -0.077566667 |
| XAGE1C    | 0.0856       | 0.115933333  | 0.358366667  | -0.385533333 | -0.197866667 |
| MRP63     | 0.137933333  | 0.563966667  | 0.047266667  | -0.249433333 | -0.0296      |
| GLTSCR2   | 0.158666667  | 0.1549       | 0.153233333  | -0.2666      | -0.2833      |
| ISOC2     | 0.0998       | 0.200966667  | 0.336266667  | -0.152933333 | -0.228566667 |
| DMWD      | 0.449433333  | 0.130166667  | 0.286066667  | -0.084566667 | -0.208       |
| MITF      | 0.186        | 0.2725       | 0.2592       | -0.1447      | -0.215666667 |
| COPG2     | 0.038066667  | 0.064866667  | 0.147533333  | -0.423366667 | -0.307566667 |
| TCF12     | -0.0036      | 0.2323       | 0.5031       | -0.364833333 | -0.131733333 |
| IFT74     | -0.3017      | 0.164566667  | 0.304133333  | -0.487866667 | -0.296233333 |
| C17orf61  | -0.185733333 | 0.077033333  | 0.591033333  | -0.511966667 | -0.162933333 |
| PSMD8     | 0.4257       | 0.403466667  | 0.153733333  | -0.010166667 | -0.122466667 |
| CHMP2A    | -0.367933333 | 0.0491       | 0.556866667  | -0.5552      | -0.3641      |
| CCDC97    | 0.1683       | 0.1282       | 0.085766667  | -0.206766667 | -0.337333333 |
| LOC388556 | 0.109766667  | 0.2837       | 0.144533333  | -0.244333333 | -0.209       |
| RAB31     | 0.025666667  | 0.1643       | 0.637666667  | -0.147066667 | -0.294333333 |
| ZNF805    | 0.186033333  | 0.1817       | 0.323333333  | -0.206       | -0.215966667 |
| NRIP1     | -0.0361      | 0.520633333  | 0.868        | -0.399533333 | 0.102633333  |
| SFRS15    | 0.657466667  | 0.421766667  | 0.284033333  | 0.215333333  | -0.136366667 |
| ZNF45     | 0.459866667  | 0.330766667  | 0.2138       | -0.129833333 | -0.088       |
| NLGN1     | 0.1865       | -0.075266667 | 0.362133333  | -0.343833333 | -0.394266667 |
| LOC651064 | 0.208833333  | 0.3319       | 0.4394       | -0.173733333 | -0.132933333 |
| SIX5      | 0.059        | 0.1181       | 0.398066667  | -0.301566667 | -0.289733333 |
| CXCL1     | 0.4702       | 0.3239       | 0.981633333  | -0.104866667 | 0.142366667  |
| RPL15     | 0.018166667  | 0.110766667  | 0.2024       | -0.404866667 | -0.320633333 |
| DIAPH2    | -0.023133333 | 0.2903       | 0.204733333  | -0.503       | -0.2384      |
| SNRPD2    | 0.1115       | 0.3002       | 0.344633333  | -0.1816      | -0.136933333 |
| C14orf167 | -0.104466667 | 0.113833333  | 0.222133333  | -0.387866667 | -0.3021      |
| MYO5A     | 0.406833333  | 0.3526       | 0.227633333  | -0.1231      | -0.044666667 |
| SMAD6     | 0.083466667  | 0.440933333  | 0.298066667  | -0.347266667 | -0.070633333 |
| LOC728153 | 0.267        | 0.313266667  | 0.300566667  | -0.089566667 | -0.2078      |
| ADAM23    | 0.011733333  | 0.105066667  | 0.285866667  | -0.395933333 | -0.456366667 |
| LOC113386 | 0.294166667  | 0.0192       | 0.003333333  | -0.3711      | -0.277233333 |
| SNTB1     | -0.206466667 | -0.123066667 | 0.474733333  | -0.733433333 | -0.476433333 |
| MMP16     | -0.0138      | 0.071166667  | 0.274366667  | -0.408733333 | -0.247933333 |
| ZNF226    | -0.054966667 | 0.3193       | 0.345733333  | -0.406233333 | -0.118533333 |
| CDKN1C    | -0.2024      | 0.3445       | 0.406033333  | -0.504466667 | -0.204433333 |
| SVIL      | 0.037733333  | 0.205        | 0.456466667  | -0.4097      | -0.115433333 |

|              |              |              |              |              |              |
|--------------|--------------|--------------|--------------|--------------|--------------|
| DLL3         | 0.409533333  | 0.405266667  | 0.3228       | -0.079933333 | -0.0444      |
| NDUFA3       | 0.033966667  | 0.067833333  | 0.431833333  | -0.347866667 | -0.265166667 |
| SEZ6L2       | 0.034533333  | -0.24        | 0.535733333  | -0.421233333 | -0.409       |
| HES6         | 0.3433       | 0.097333333  | -0.009533333 | -0.323366667 | -0.290833333 |
| DCXR         | 0.108166667  | 0.186        | 0.027066667  | -0.340166667 | -0.309166667 |
| EPN1         | 0.129833333  | 0.223033333  | 0.309766667  | -0.313533333 | -0.2306      |
| TMSL3        | -0.195166667 | 0.130066667  | 0.492533333  | -0.5523      | -0.232633333 |
| ZMIZ1        | 0.218366667  | -0.061666667 | 0.255066667  | -0.589666667 | -0.3081      |
| PRR16        | 0.769866667  | 0.246933333  | -0.134133333 | 0.311733333  | -0.368133333 |
| SLC27A5      | 0.1751       | 0.362333333  | 0.305233333  | -0.195133333 | -0.197766667 |
| MYADM        | 0.373433333  | 0.354533333  | 0.435733333  | -0.142166667 | -0.0853      |
| RRAS         | -0.0642      | 0.309866667  | 0.629366667  | -0.380433333 | -0.127533333 |
| DUT          | 0.412566667  | 0.441566667  | 0.179        | -0.0081      | -0.061766667 |
| ZFPM1        | -0.010933333 | 0.029066667  | 0.319933333  | -0.336333333 | -0.342666667 |
| OVOS2        | -0.0818      | 0.131666667  | 0.0538       | -0.822666667 | -0.3737      |
| SETDB1       | 0.059466667  | 0.123933333  | 0.283833333  | -0.325933333 | -0.360833333 |
| IRF2BP1      | 0.482033333  | 0.3215       | 0.212733333  | -0.034433333 | -0.253       |
| UQCRFS1      | 0.294333333  | 0.1525       | 0.2132       | -0.2278      | -0.293466667 |
| SNORA16A     | 0.739733333  | 0.459833333  | 0.082533333  | 0.094        | 0.005366667  |
| TMEM145      | 0.147466667  | 0.2032       | 0.233166667  | -0.250466667 | -0.253766667 |
| PPP2R1A      | 0.1677       | 0.203166667  | 0.224166667  | -0.370833333 | -0.245866667 |
| KPTN         | 0.3515       | 0.2837       | 0.2468       | -0.115133333 | -0.142533333 |
| NDE1         | 0.2275       | 0.183933333  | 0.5303       | -0.075666667 | -0.338633333 |
| SPARC        | 0.435433333  | 0.337466667  | 0.542        | -0.130033333 | -0.1627      |
| SEMA3A       | 0.553        | 0.399566667  | 0.4289       | -0.0283      | 0.103066667  |
| SSX3         | 0.5339       | 0.312266667  | 0.200266667  | -0.0257      | -0.212966667 |
| LOC284821    | 0.2072       | 0.1266       | 0.3275       | -0.280733333 | -0.445633333 |
| LOC92659     | 0.411933333  | 0.269066667  | 0.303366667  | -0.117066667 | -0.1942      |
| PCDH7        | -0.098666667 | 0.121833333  | 0.504666667  | -0.4357      | -0.3161      |
| BCKDHA       | -0.015166667 | 0.145866667  | 0.521866667  | -0.309366667 | -0.371733333 |
| ARHGEF3      | -0.255833333 | 0.2456       | 0.8664       | -0.509833333 | -0.075066667 |
| HNRNPA0      | 0.1149       | 0.154866667  | 0.143933333  | -0.430966667 | -0.328166667 |
| FAM69B       | -0.033266667 | 0.099133333  | 0.571466667  | -0.413733333 | -0.3497      |
| IGFBP6       | -0.1651      | 0.0401       | 0.903066667  | -0.631333333 | -0.268433333 |
| TPR          | 0.293933333  | 0.2015       | 0.388733333  | -0.277033333 | -0.2584      |
| GPSM2        | 0.495733333  | 0.486233333  | 0.3857       | 0.021966667  | -0.0823      |
| YIF1B        | 0.0171       | 0.2439       | 0.4129       | -0.279966667 | -0.2219      |
| CTSH         | 0.0985       | 0.1382       | 0.343833333  | -0.317166667 | -0.316366667 |
| PRKCA        | -0.144666667 | 0.24         | 0.197466667  | -0.572866667 | -0.2385      |
| RBM42        | 0.3635       | 0.1779       | 0.217266667  | 0.043566667  | -0.2285      |
| LOC440311    | 0.194966667  | 0.080866667  | 0.417966667  | -0.1072      | -0.2828      |
| LOC100132394 | 0.648366667  | 0.173533333  | -0.0249      | -0.002333333 | -0.354866667 |
| LOC731682    | 0.091366667  | 0.1115       | 0.174166667  | -0.471733333 | -0.3108      |
| KIAA0528     | 0.303733333  | 0.145666667  | 0.284566667  | -0.198566667 | -0.162966667 |
| RPS29        | -0.383833333 | 0.014366667  | 0.565533333  | -0.525066667 | -0.396966667 |
| LEF1         | 0.582933333  | 0.412066667  | 0.5253       | 0.072466667  | -0.012366667 |
| POLD1        | 0.5168       | 0.495333333  | 0.273166667  | -0.0729      | -0.043433333 |



|              |              |              |             |              |              |
|--------------|--------------|--------------|-------------|--------------|--------------|
| THAP10       | 0.458533333  | 0.324033333  | 0.324633333 | -0.1168      | -0.0209      |
| ROPN1B       | 0.004066667  | 0.0622       | 0.506666667 | -0.215933333 | -0.507       |
| C14orf142    | 0.377033333  | 0.3666       | 0.290433333 | -0.174466667 | -0.052533333 |
| BTBD3        | 0.068466667  | 0.315833333  | 0.689966667 | -0.1245      | -0.163566667 |
| LRP11        | 0.0617       | -0.066033333 | 0.332966667 | -0.524066667 | -0.3462      |
| SNCA         | 0.059033333  | 0.088933333  | 0.0534      | -0.6412      | -0.305633333 |
| TTC3         | -0.064       | 0.002366667  | 0.4916      | -0.343166667 | -0.351266667 |
| LARP6        | -0.251933333 | -0.126133333 | 0.156433333 | -0.789266667 | -0.623433333 |
| CPE          | -0.069566667 | -0.1618      | 0.2777      | -0.413566667 | -0.466733333 |
| SPG11        | -0.096333333 | -0.036533333 | 0.322633333 | -0.533566667 | -0.400966667 |
| LOC100131572 | -0.265966667 | 0.283033333  | 0.063233333 | -0.468566667 | -0.365933333 |
| LOC728715    | 0.112666667  | 0.087        | 0.344433333 | -0.554633333 | -0.343833333 |
| C9orf40      | 0.5657       | 0.448966667  | 0.275966667 | -0.066033333 | -0.003866667 |
| ARID5B       | -0.029766667 | 0.231133333  | 0.4939      | -0.481433333 | -0.120666667 |
| 2-Sep        | 0.169633333  | 0.271666667  | 0.360766667 | -0.2492      | -0.254066667 |
| KIFAP3       | 0.1446       | 0.242366667  | 0.418166667 | -0.236       | -0.1914      |
| DHRS2        | 0.335466667  | 0.368766667  | 0.4743      | -0.174333333 | 0.0202       |
| FAM84B       | 0.5044       | 0.3253       | 0.508033333 | -0.0442      | -0.117633333 |
| TCTEX1D2     | -0.045066667 | 0.147833333  | 0.4474      | -0.333433333 | -0.3379      |
| RPL34        | 0.094866667  | 0.337366667  | 0.2004      | -0.305966667 | -0.188033333 |
| EPHB4        | 0.4163       | 0.236966667  | 0.294633333 | -0.187433333 | -0.198833333 |
| EMD          | 0.211066667  | 0.182533333  | 0.1598      | -0.377       | -0.198033333 |
| NUDT11       | 0.6132       | 0.255266667  | 0.295733333 | -0.027633333 | 0.0176       |
| LOC730382    | 0.115833333  | 0.534433333  | 0.088266667 | -0.401633333 | -0.152433333 |
| TMEM19       | 0.139466667  | 0.3613       | 0.2243      | -0.2953      | -0.0833      |
| S100A13      | 0.048666667  | 0.093966667  | 0.6169      | -0.282866667 | -0.3469      |
| C19orf48     | 0.495166667  | 0.4419       | 0.1369      | 0.019333333  | -0.2866      |
| TFPT         | 0.237133333  | 0.328133333  | 0.314533333 | -0.274233333 | -0.0752      |
| CBX2         | 0.753333333  | 0.423133333  | 0.347233333 | 0.185333333  | -0.172133333 |
| EXOSC5       | 0.413466667  | 0.303066667  | 0.247633333 | -0.17        | -0.173366667 |
| STK32B       | 0.165666667  | 0.2557       | 0.2935      | -0.2257      | -0.2002      |
| LOC648822    | 0.4518       | 0.5764       | 0.020633333 | -0.122066667 | 0.0326       |
| ZIK1         | 0.548433333  | 0.6815       | 0.249333333 | -0.026833333 | 0.0632       |
| EPS8         | -0.0379      | 0.149333333  | 0.387233333 | -0.4718      | -0.1358      |
| TANC2        | -0.0205      | 0.212433333  | 0.5231      | -0.375866667 | -0.3168      |
| PRICKLE1     | 0.2452       | 0.0882       | 0.327766667 | -0.414333333 | -0.2207      |
| ZNF462       | -0.077233333 | 0.264433333  | 0.4166      | -0.455166667 | -0.391133333 |
| PCDH18       | -0.063666667 | 0.3664       | 0.616833333 | -0.297733333 | -0.1367      |
| GRAMD1A      | 0.2608       | 0.094433333  | 0.4938      | -0.236166667 | -0.248       |
| EHD2         | 0.063866667  | 0.266733333  | 0.296866667 | -0.3221      | -0.2575      |
| PAFAH1B3     | 0.317733333  | 0.164533333  | 0.4136      | -0.230866667 | -0.144933333 |
| CLDN1        | 0.433        | 0.438833333  | 0.367066667 | -0.017433333 | -0.1608      |
| NDUFB6       | 0.103166667  | 0.203466667  | 0.246033333 | -0.3022      | -0.4099      |
| ASAP3        | 0.141766667  | 0.2072       | 0.5047      | -0.206933333 | -0.221566667 |
| DBNDD1       | -0.0055      | 0.299133333  | 0.416833333 | -0.55        | -0.121133333 |
| FAM20C       | 0.010433333  | 0.294333333  | 1.227533333 | -0.4335      | -0.0511      |
| KAT2B        | 0.007866667  | 0.233233333  | 0.7458      | -0.347633333 | -0.113066667 |

|              |              |              |             |              |              |
|--------------|--------------|--------------|-------------|--------------|--------------|
| MPDZ         | 0.218566667  | 0.255666667  | 0.613033333 | -0.1514      | -0.1766      |
| SARS2        | 0.4007       | 0.313233333  | 0.3613      | -0.1131      | -0.161366667 |
| PREP         | 0.222366667  | 0.2038       | 0.3513      | -0.2756      | -0.2964      |
| ITGA1        | 0.3013       | 0.4101       | 0.9652      | -0.0974      | -0.138066667 |
| LOC100134364 | 0.594533333  | 0.247533333  | 0.1652      | 0.0632       | -0.363866667 |
| C7orf55      | -0.03        | 0.100233333  | 0.1908      | -0.5787      | -0.3344      |
| NCOA7        | -0.3261      | 0.057066667  | 0.3375      | -0.5457      | -0.383433333 |
| BCL3         | 0.257666667  | 0.143666667  | 0.690933333 | -0.122       | -0.234566667 |
| TMEM147      | 0.287966667  | 0.136766667  | 0.2608      | -0.173633333 | -0.292166667 |
| ACTN4        | 0.065533333  | 0.1563       | 0.536266667 | -0.361133333 | -0.3107      |
| E2F2         | 0.855166667  | 0.4149       | 0.228833333 | -0.054466667 | -0.0093      |
| COL4A2       | 0.615166667  | 0.157433333  | 0.701566667 | -0.003566667 | -0.216266667 |
| OPA3         | 0.366033333  | 0.324633333  | 0.3984      | -0.2103      | -0.0295      |
| FLJ10781     | 0.381966667  | 0.364966667  | 0.0611      | -0.128033333 | -0.314533333 |
| PTGES        | -0.396333333 | -0.004633333 | 1.007666667 | -0.727533333 | -0.287233333 |
| AASS         | 0.114633333  | 0.436166667  | 0.404366667 | -0.328133333 | -0.1222      |
| SND1         | 0.123366667  | 0.0973       | 0.2972      | -0.412066667 | -0.3973      |
| LOC100129553 | 0.2294       | 0.217466667  | 0.390366667 | -0.264566667 | -0.278066667 |
| BCL2L12      | 0.508933333  | 0.600566667  | 0.2653      | -0.167333333 | 0.019966667  |
| GCHFR        | -0.1443      | 0.2495       | 0.544166667 | -0.545366667 | -0.2538      |
| CD109        | 0.084733333  | -0.024366667 | 0.1714      | -0.3855      | -0.6074      |
| LOC100133008 | 0.251666667  | 0.330533333  | 0.314066667 | -0.078966667 | -0.163466667 |
| EIF3K        | 0.2255       | 0.158966667  | 0.246       | -0.2818      | -0.3268      |
| LRFN3        | 0.126633333  | 0.2368       | 0.446833333 | -0.486633333 | -0.185933333 |
| LOC391019    | 0.051666667  | 0.1326       | 0.208166667 | -0.4591      | -0.363433333 |
| PSENN        | 0.092066667  | 0.220633333  | 0.2584      | -0.3353      | -0.275766667 |
| CYB5D2       | -0.183033333 | 0.0339       | 0.3384      | -0.593466667 | -0.467233333 |
| LOC85389     | 0.860366667  | 0.7467       | 0.0796      | 0.198033333  | 0.1521       |
| ZNF428       | 0.0682       | 0.165733333  | 0.2021      | -0.443133333 | -0.279666667 |
| FLJ10916     | -0.216033333 | 0.160666667  | 0.643433333 | -0.496833333 | -0.360133333 |
| PCDHB5       | 0.0848       | 0.256266667  | 0.4907      | -0.357533333 | -0.3174      |
| TSEN34       | 0.245633333  | 0.418433333  | 0.356466667 | -0.1421      | -0.1811      |
| PRMT1        | 0.719966667  | 0.486166667  | 0.331666667 | 0.122633333  | -0.037366667 |
| RAB11A       | 0.077333333  | 0.2606       | 0.123466667 | -0.344266667 | -0.4339      |
| CLPTM1       | 0.419233333  | 0.1259       | 0.429633333 | -0.1075      | -0.314966667 |
| EGLN2        | 0.364766667  | 0.431533333  | 0.234333333 | -0.0794      | -0.313233333 |
| PCNT         | 0.629333333  | 0.484933333  | 0.4686      | 0.019033333  | -0.032933333 |
| PRKCZ        | 0.164166667  | 0.315933333  | 0.7195      | -0.203033333 | -0.149666667 |
| CAPNS1       | 0.041266667  | 0.0608       | 0.534566667 | -0.524866667 | -0.276866667 |
| CSTF3        | 0.455166667  | 0.636666667  | 0.443733333 | -0.0977      | 0.123566667  |
| ERICH1       | 0.539866667  | 0.248466667  | 0.433533333 | -0.163766667 | -0.135533333 |
| NME4         | 0.166366667  | 0.101233333  | 0.539066667 | -0.3186      | -0.422133333 |
| AFAP1        | 0.148266667  | 0.3436       | 0.932333333 | -0.271633333 | -0.0282      |
| LOC100133583 | 0.302966667  | 0.011966667  | 0.287766667 | -0.268633333 | -0.406866667 |
| HDCC3        | 0.0549       | 0.1267       | 0.3279      | -0.513466667 | -0.319233333 |
| TLE4         | 0.2572       | 0.300566667  | 0.321966667 | -0.0415      | -0.339066667 |
| HNRPUL1      | 0.3576       | 0.296933333  | 0.4082      | -0.1623      | -0.160166667 |

|              |              |              |              |              |              |
|--------------|--------------|--------------|--------------|--------------|--------------|
| MDK          | -0.051533333 | -0.186066667 | 0.705866667  | -0.5388      | -0.5999      |
| SPANXE       | 0.015933333  | 0.334366667  | 0.454        | -0.548833333 | -0.2319      |
| WNT5A        | 0.4783       | 0.459266667  | 0.224933333  | -0.2295      | -0.177433333 |
| TBCB         | 0.382933333  | 0.3538       | 0.448733333  | -0.126966667 | -0.153333333 |
| MRPS21       | 0.276766667  | 0.1324       | 0.170566667  | -0.367433333 | -0.3453      |
| SCAND1       | 0.192        | 0.074233333  | 0.425233333  | -0.3523      | -0.3137      |
| FOXD2        | 0.390033333  | 0.479266667  | 0.762466667  | -0.130733333 | -0.113733333 |
| PNMAL1       | 0.201133333  | 0.269566667  | 0.0232       | -0.230333333 | -0.4082      |
| ADCK4        | 0.105866667  | 0.169933333  | 0.406233333  | -0.423066667 | -0.281533333 |
| PPP2R2B      | -0.2958      | 0.0333       | 0.357433333  | -0.5527      | -0.482766667 |
| PLEKHA4      | 0.1383       | 0.205333333  | 0.608066667  | -0.416066667 | -0.185066667 |
| NNT          | 0.086333333  | -0.2192      | 0.288633333  | -0.634033333 | -0.454066667 |
| TCFL5        | 0.088133333  | 0.014733333  | 0.156333333  | -0.3514      | -0.5487      |
| LPCAT2       | 0.721966667  | 0.326266667  | 0.292566667  | 0.1098       | -0.1625      |
| LOC100133565 | 1.0158       | 0.819033333  | -0.089566667 | 0.512766667  | 0.011466667  |
| SIDT2        | -0.368033333 | 0.265233333  | 0.707066667  | -0.785333333 | -0.1882      |
| DSCR8        | 0.067533333  | 0.070533333  | 0.3754       | -0.4334      | -0.399433333 |
| PTGER4       | 0.536566667  | 0.488666667  | 0.164166667  | -0.057233333 | -0.158433333 |
| GPC6         | 0.1016       | 0.1812       | 0.3582       | -0.292066667 | -0.4103      |
| IL8          | 0.013966667  | 0.252133333  | 1.452933333  | -0.654166667 | -0.040133333 |
| SLC1A1       | 0.625266667  | 0.581933333  | 0.701233333  | -0.078533333 | 0.1512       |
| TCEA2        | -0.160633333 | 0.061866667  | 0.641766667  | -0.589233333 | -0.366066667 |
| ZNF581       | 0.167566667  | 0.0816       | 0.398033333  | -0.264233333 | -0.480466667 |
| POLR2I       | 0.384966667  | 0.326066667  | 0.541866667  | -0.162633333 | -0.222366667 |
| NUCB1        | 0.038        | -0.035366667 | 0.4565       | -0.540766667 | -0.420533333 |
| RND3         | 0.5596       | 0.609033333  | 0.4198       | 0.1325       | -0.088066667 |
| TUBB3        | 0.143        | 0.175033333  | 0.319366667  | -0.504466667 | -0.505333333 |
| HEATR2       | 0.5334       | 0.400733333  | 0.329        | -0.148366667 | -0.206133333 |
| GSPT2        | 0.2029       | 0.166766667  | 0.064766667  | -0.428033333 | -0.3049      |
| EYA1         | 0.1067       | 0.359233333  | 0.533866667  | -0.404566667 | -0.1455      |
| CTNNBIP1     | 0.602466667  | 0.3442       | 0.581833333  | -0.0562      | -0.0641      |
| PEPD         | 0.098266667  | 0.030466667  | 0.105966667  | -0.508533333 | -0.486466667 |
| NNMT         | 0.296466667  | 0.016        | 0.071066667  | -0.3108      | -0.543533333 |
| SOX5         | -0.012833333 | 0.263466667  | 0.891933333  | -0.397733333 | -0.258933333 |
| LOC401676    | 0.2746       | 0.3853       | 0.258466667  | -0.246933333 | -0.3109      |
| C18orf56     | 0.271166667  | 0.204433333  | 0.254966667  | -0.296933333 | -0.293133333 |
| ARPP-21      | 0.620966667  | 0.552033333  | 0.777        | -0.2004      | 0.1228       |
| NUDT1        | 0.665233333  | 0.601966667  | 0.4805       | 0.074566667  | -0.024066667 |
| LOC728953    | 0.262533333  | 0.4239       | 0.2985       | -0.244766667 | -0.2449      |
| PTOV1        | -0.1915      | 0.248333333  | 0.791066667  | -0.5213      | -0.379066667 |
| NAT14        | 0.112666667  | 0.1106       | 0.5097       | -0.475566667 | -0.317766667 |
| NCRNA00085   | -0.0777      | 0.493566667  | 0.6981       | -0.353066667 | -0.171766667 |
| MZF1         | 0.137266667  | 0.2003       | 0.158666667  | -0.497066667 | -0.3659      |
| GPNUMB       | 0.017333333  | -0.0111      | -0.140366667 | -0.706166667 | -0.7177      |
| HMGB3        | 0.6313       | 0.554333333  | 0.468433333  | 0.022133333  | -0.143366667 |
| SPANXA2      | -0.022333333 | 0.1259       | 0.4955       | -0.7064      | -0.433466667 |
| ZNF362       | 0.040466667  | 0.107566667  | 0.306233333  | -0.4594      | -0.499233333 |

|              |              |              |             |              |              |
|--------------|--------------|--------------|-------------|--------------|--------------|
| LOC653506    | 0.345366667  | 0.0391       | 0.042666667 | -0.5678      | -0.4405      |
| WBP1         | -0.410933333 | 0.062033333  | 0.712633333 | -0.709833333 | -0.454533333 |
| ATP5SL       | 0.473133333  | 0.3976       | 0.193666667 | -0.205833333 | -0.248833333 |
| LIG1         | 0.729366667  | 0.6096       | 0.412166667 | 0.13         | -0.1524      |
| SLC5A6       | 0.781433333  | 0.4705       | 0.496333333 | -0.030666667 | 0.030166667  |
| ENC1         | 0.615933333  | 0.576133333  | 0.571       | -0.0981      | -0.114766667 |
| HERC5        | 0.061833333  | 0.502633333  | 0.5904      | -0.4968      | -0.158566667 |
| METRNL       | 0.3551       | -0.001666667 | 0.0568      | -0.4356      | -0.552033333 |
| CLCC1        | 0.4522       | 0.7442       | 0.537       | -0.119866667 | 0.042033333  |
| SNHG9        | 0.751466667  | 0.500433333  | 0.217766667 | -0.035633333 | -0.234033333 |
| SSX4B        | 0.398966667  | 0.550866667  | 0.316166667 | -0.1466      | -0.143033333 |
| FAM134B      | -0.160933333 | 0.0582       | 0.342933333 | -0.6386      | -0.4801      |
| LOC100128675 | 0.270533333  | 0.3211       | 0.901766667 | -0.1495      | -0.1749      |
| C19orf28     | 0.264733333  | 0.1078       | 0.2755      | -0.5076      | -0.3308      |
| DDIT4        | -0.7708      | -0.626833333 | 0.055766667 | -1.368633333 | -1.372233333 |
| CD1D         | 0.274466667  | 0.222833333  | 0.437033333 | -0.379966667 | -0.306533333 |
| GSTA4        | 0.230133333  | 0.4482       | 0.578666667 | -0.2414      | -0.215533333 |
| RIMKLB       | 0.835566667  | 0.538866667  | 0.431066667 | -0.126433333 | -0.065533333 |
| GBGT1        | 0.330733333  | 0.4345       | 0.221       | -0.315533333 | -0.181033333 |
| C19orf2      | 0.517833333  | 0.501366667  | 0.373933333 | -0.2202      | -0.1298      |
| COL5A2       | 0.2202       | 0.3919       | 0.600933333 | -0.2464      | -0.246566667 |
| ALPK2        | 0.576166667  | 0.2911       | 0.2444      | -0.1618      | -0.2828      |
| NOX4         | 0.754233333  | 0.450766667  | 0.470933333 | 0.0458       | -0.132033333 |
| TUBB2B       | -0.162366667 | -0.266133333 | 0.262466667 | -0.912833333 | -0.7918      |
| SLAIN1       | -0.191466667 | 0.281466667  | 0.757666667 | -0.4441      | -0.319166667 |
| COL6A1       | 0.257533333  | 0.015966667  | 0.5137      | -0.4642      | -0.433366667 |
| SGK1         | 0.6796       | 0.299033333  | 0.691766667 | 0.153633333  | -0.334266667 |
| ST3GAL5      | 0.3562       | 0.555133333  | 1.321666667 | -0.206966667 | 0.109966667  |
| LOC652683    | 0.0512       | 0.280733333  | 0.570633333 | -0.697533333 | -0.289666667 |
| CFI          | 0.218466667  | 0.126166667  | 0.899233333 | -0.2139      | -0.369433333 |
| POLN         | 0.382066667  | 0.195366667  | 0.3858      | -0.425833333 | -0.302633333 |
| TFF2         | -0.066666667 | 0.0948       | 0.746233333 | -0.519566667 | -0.440866667 |
| NEDD9        | 0.1553       | 0.3955       | 0.325633333 | -0.667933333 | -0.1625      |
| NUCKS1       | 0.079266667  | 0.315033333  | 1.036633333 | -0.2313      | -0.4847      |
| PMP22        | 0.521633333  | 0.1057       | 0.123166667 | -0.400566667 | -0.371       |
| LOC645138    | 0.162466667  | 0.3568       | 0.209866667 | -0.521666667 | -0.342666667 |
| DLK2         | -0.1436      | 0.272233333  | 0.7505      | -0.6528      | -0.351666667 |
| FERMT2       | 0.3835       | 0.335        | 0.224666667 | -0.2463      | -0.392166667 |
| KIAA0114     | 0.5528       | 0.7158       | 0.1207      | -0.2033      | -0.0779      |
| CDKN1B       | -0.294966667 | 0.0296       | 0.2301      | -0.687033333 | -0.673233333 |
| NT5DC2       | 0.684233333  | 0.346633333  | 0.3722      | -0.0819      | -0.245666667 |
| CSRP2        | 0.498333333  | 0.348633333  | 0.257933333 | -0.303766667 | -0.341166667 |
| SGK          | 0.556233333  | 0.338666667  | 0.7689      | 0.060033333  | -0.257633333 |
| F2RL1        | 0.598633333  | 0.669733333  | 1.0631      | 0.034533333  | 0.014166667  |
| CLIP3        | -0.615366667 | 0.2436       | 1.1503      | -0.919833333 | -0.428333333 |
| LOC136143    | 0.3141       | 0.373366667  | 0.4681      | -0.178666667 | -0.3362      |
| TRIM2        | -0.446266667 | -0.194533333 | 0.6777      | -1.178866667 | -0.479033333 |

|              |              |             |             |              |              |
|--------------|--------------|-------------|-------------|--------------|--------------|
| TGFA         | 0.4316       | 0.514766667 | 1.004       | -0.495933333 | 0.024233333  |
| LOC387825    | 0.071766667  | 0.198533333 | 0.315533333 | -0.436933333 | -0.445766667 |
| RXRA         | 0.275        | 0.078633333 | 0.1911      | -0.4829      | -0.465533333 |
| GBP2         | -0.057366667 | 0.1762      | 1.149566667 | -0.4775      | -0.340933333 |
| SULF2        | 0.2654       | 0.2852      | 0.529466667 | -0.462133333 | -0.285133333 |
| BAMBI        | -0.2196      | -0.0015     | 0.448666667 | -0.9386      | -0.598566667 |
| PCDHB2       | 0.278        | 0.2839      | 0.275966667 | -0.579266667 | -0.325466667 |
| CENPF        | 0.542033333  | 0.8547      | 0.733233333 | -0.053433333 | -0.0801      |
| RGS2         | 0.526833333  | 0.423433333 | 0.9137      | 0.0621       | -0.041666667 |
| ACPL2        | 0.7452       | 0.687933333 | 1.212133333 | -0.0203      | 0.090433333  |
| C12orf57     | 0.199133333  | 0.1902      | 0.536633333 | -0.5047      | -0.385833333 |
| FARP1        | 0.231433333  | 0.204066667 | 0.528633333 | -0.452566667 | -0.3701      |
| TRIB2        | 0.1706       | 0.552       | 1.155033333 | -0.132433333 | -0.272433333 |
| LOC100133171 | 0.0871       | 0.378433333 | 0.6598      | -0.619166667 | -0.2884      |
| EYA4         | 0.134366667  | 0.332233333 | 0.504333333 | -0.469033333 | -0.433233333 |
| MYH10        | 0.4834       | 0.4354      | 0.742466667 | -0.211033333 | -0.2853      |
| LOC388564    | 0.240533333  | 0.294766667 | 0.291433333 | -0.4009      | -0.3509      |
| PMEP1        | 0.200233333  | 0.281566667 | 0.480166667 | -0.556033333 | -0.304433333 |
| SORCS1       | 0.215        | 0.4187      | 1.164633333 | -0.188166667 | -0.174133333 |
| STMN3        | 0.297566667  | 0.395       | 0.625933333 | -0.309433333 | -0.343333333 |
| SDHAF1       | 0.503533333  | 0.262433333 | 0.232666667 | -0.230866667 | -0.51        |
| LOC729279    | 0.1253       | 0.171033333 | 0.374966667 | -0.519833333 | -0.469766667 |
| PTMS         | 0.420733333  | 0.2747      | 0.510966667 | -0.342433333 | -0.373266667 |
| CLDND2       | 0.433666667  | 0.401933333 | 0.2807      | -0.4465      | -0.3468      |
| CNIH2        | 0.424966667  | 0.250433333 | 0.7924      | -0.249       | -0.295966667 |
| SEPW1        | 0.142866667  | 0.431766667 | 0.4063      | -0.431066667 | -0.3903      |
| ECH1         | -0.249933333 | 0.1195      | 0.659133333 | -0.710466667 | -0.549366667 |
| LOC729843    | -0.314       | 0.0832      | 0.722733333 | -0.970233333 | -0.504566667 |
| H1FO         | 0.375666667  | 0.6023      | 0.644533333 | -0.319466667 | -0.193433333 |
| SPOCK1       | 0.245033333  | 0.1247      | 0.258333333 | -0.623733333 | -0.6008      |
| LOC727826    | 0.3011       | 0.339566667 | 0.522033333 | -0.4128      | -0.3756      |
| CAPS         | -0.153766667 | 0.2066      | 1.0729      | -0.7114      | -0.5291      |
| LIMCH1       | 0.001833333  | 0.213466667 | 0.388933333 | -0.9763      | -0.441766667 |
| FABP7        | 0.205033333  | 0.197933333 | 0.760366667 | -0.406933333 | -0.432766667 |
| MARCKS       | 0.208233333  | 0.174533333 | 0.532533333 | -0.4587      | -0.417366667 |
| CDH19        | 0.173933333  | 0.156666667 | 0.209333333 | -0.4557      | -0.6441      |
| HLA-DMA      | 0.039733333  | 0.060566667 | 0.314333333 | -0.743033333 | -0.562233333 |
| PDLIM1       | 0.311433333  | 0.378333333 | 0.298166667 | -0.418733333 | -0.362833333 |
| TNS3         | 0.0028       | 0.385466667 | 0.721233333 | -0.603966667 | -0.463533333 |
| SPANXC       | 0.1711       | 0.313933333 | 0.513933333 | -0.7852      | -0.4087      |
| RPL28        | 0.186233333  | 0.173566667 | 0.5896      | -0.470366667 | -0.498866667 |
| SHC4         | 0.123133333  | 0.315966667 | 0.5891      | -0.594066667 | -0.389466667 |
| HOXB8        | 0.715066667  | 0.451266667 | 1.0634      | -0.087       | -0.0762      |
| ZNF580       | 0.089066667  | 0.1059      | 0.513833333 | -0.654166667 | -0.612233333 |
| MOXD1        | 0.239266667  | 0.131966667 | 0.935133333 | -0.398766667 | -0.3907      |
| PLP1         | -0.3056      | 0.149033333 | 0.967966667 | -0.679866667 | -0.5768      |
| C5orf13      | 0.038933333  | 0.404466667 | 0.874066667 | -0.5984      | -0.451133333 |

|              |              |             |             |              |              |
|--------------|--------------|-------------|-------------|--------------|--------------|
| HLA-DRB4     | 0.4153       | 0.0265      | 0.1704      | -0.5322      | -0.769933333 |
| EID2         | 0.4674       | 0.354666667 | 0.2254      | -0.239466667 | -0.6057      |
| GNE          | 0.2482       | 0.830533333 | 1.2502      | -0.312833333 | 0.016733333  |
| FLJ46906     | -0.1363      | 0.344566667 | 0.902433333 | -0.797966667 | -0.322733333 |
| SPANXB1      | 0.035366667  | 0.374233333 | 0.623733333 | -0.7001      | -0.416133333 |
| HLA-DPA1     | 0.013133333  | 0.088033333 | 0.249433333 | -0.799866667 | -0.669766667 |
| FAM46A       | -0.0722      | 0.069166667 | 0.9861      | -0.601266667 | -0.475033333 |
| GAGE7        | 0.304166667  | 0.486933333 | 0.590466667 | -0.347066667 | -0.290933333 |
| RUNX3        | 0.852033333  | 0.586133333 | 0.513733333 | -0.1408      | -0.1531      |
| LPHN2        | 0.162666667  | 0.2443      | 0.6434      | -0.5184      | -0.495033333 |
| LUM          | 0.318        | 0.538533333 | 0.261666667 | -0.528133333 | -0.3417      |
| C4orf18      | 0.430133333  | 0.454833333 | 0.648566667 | -0.2965      | -0.350966667 |
| DEPDC7       | 1.148333333  | 0.866366667 | 0.1081      | 0.0256       | -0.025866667 |
| FST          | 1.182766667  | 0.6321      | 0.9092      | 0.3001       | -0.095466667 |
| C1orf133     | 0.8728       | 0.655133333 | 0.530466667 | 0.0219       | -0.143866667 |
| MEIS2        | 0.336633333  | 0.317366667 | 0.6811      | -0.538166667 | -0.433966667 |
| FAM108C1     | 0.804666667  | 0.710366667 | 1.118833333 | -0.071066667 | -0.051933333 |
| LOC642073    | 0.0683       | 0.0692      | 0.201966667 | -0.733666667 | -0.6849      |
| LOC644511    | 0.380533333  | 0.401366667 | 0.473933333 | -0.384766667 | -0.537933333 |
| NES          | 0.705433333  | 0.691766667 | 0.997933333 | -0.163433333 | -0.2888      |
| FLRT3        | 0.3049       | 0.6621      | 0.846866667 | -0.7013      | -0.089866667 |
| SLC35F1      | 0.207866667  | 0.397133333 | 0.320366667 | -0.6647      | -0.4898      |
| PDE4B        | 0.1448       | 0.529366667 | 0.598733333 | -0.5688      | -0.482166667 |
| ERBB3        | -0.1058      | 0.3293      | 0.797433333 | -1.088       | -0.459166667 |
| SEMA3C       | -0.115466667 | 0.067666667 | 0.6496      | -0.745066667 | -0.611633333 |
| MIA          | 0.1075       | 0.1472      | 0.346433333 | -0.6656      | -0.8357      |
| IGFBP2       | 0.6809       | 0.5945      | 0.507266667 | -0.2728      | -0.358933333 |
| PTGS2        | 0.554433333  | 0.779033333 | 0.840566667 | -0.252066667 | -0.187266667 |
| COL4A1       | 0.8508       | 0.5999      | 1.1256      | -0.0384      | -0.194166667 |
| MAGED1       | 0.181433333  | 0.430333333 | 0.9618      | -0.504033333 | -0.4321      |
| FLJ45337     | 0.442266667  | 0.4195      | 0.552933333 | -0.452233333 | -0.4222      |
| TMEM98       | 0.837933333  | 0.557733333 | 0.665166667 | -0.173333333 | -0.386833333 |
| TSPAN13      | 0.869366667  | 0.738966667 | 0.8605      | -0.059433333 | -0.1486      |
| LOC100134134 | 0.902966667  | 0.7534      | 0.9334      | -0.0745      | -0.062333333 |
| SLC26A2      | 0.054566667  | 0.498333333 | 1.031366667 | -0.764366667 | -0.2059      |
| SERTAD4      | 1.0544       | 0.999733333 | 0.826866667 | 0.485666667  | -0.223       |
| GAS7         | 0.352966667  | 0.2798      | 0.751666667 | -0.6243      | -0.588133333 |
| DPM3         | 0.170966667  | 0.381933333 | 0.757733333 | -0.767366667 | -0.398633333 |
| CD74         | 0.0812       | 0.0713      | 0.374366667 | -0.798933333 | -0.776766667 |
| ALCAM        | 0.645633333  | 0.439833333 | 0.269966667 | -0.377366667 | -0.476866667 |
| HLA-DQA1     | 0.2979       | 0.042533333 | 0.4166      | -0.709133333 | -0.783933333 |
| NDN          | 0.3397       | 0.6611      | 0.671233333 | -0.548433333 | -0.377766667 |
| POU3F2       | 0.9601       | 0.987533333 | 0.968733333 | -0.061733333 | -0.050333333 |
| EFEMP1       | 0.5001       | 0.366733333 | 0.491933333 | -0.350333333 | -0.523133333 |
| MARCKSL1     | 0.417933333  | 0.362433333 | 0.7508      | -0.4609      | -0.593333333 |
| LOC649143    | 0.3211       | 0.059366667 | 0.216466667 | -0.994966667 | -0.877833333 |
| HLA-DRB6     | 0.3194       | 0.238533333 | 0.2244      | -0.833966667 | -0.779133333 |

|              |              |              |             |              |              |
|--------------|--------------|--------------|-------------|--------------|--------------|
| LOC730415    | 0.175566667  | -0.007633333 | 0.372966667 | -0.995533333 | -0.9232      |
| DHRS3        | -0.680733333 | 0.512266667  | 1.482266667 | -1.515533333 | -0.621466667 |
| HTRA1        | 0.0899       | -0.0083      | 0.605066667 | -0.846966667 | -0.945166667 |
| NPTX2        | 0.9288       | 0.920433333  | 1.335366667 | -0.009233333 | -0.016566667 |
| LOC100133678 | 0.384566667  | 0.033033333  | 0.2864      | -0.7938      | -1.034466667 |
| SHISA2       | 0.6998       | 0.990966667  | 0.9921      | -0.563366667 | -0.091666667 |
| HMG20B       | 0.2688       | 0.407666667  | 0.356266667 | -0.9645      | -0.775333333 |
| HLA-DMB      | 0.066633333  | 0.218766667  | 0.439566667 | -1.032666667 | -0.978833333 |
| C15orf48     | 0.153833333  | 0.219033333  | 1.293733333 | -0.7402      | -0.589766667 |
| HLA-DRA      | 0.149766667  | 0.134533333  | 0.2024      | -1.035433333 | -1.180066667 |
| KIAA1199     | 1.0246       | 1.045033333  | 2.033966667 | -0.1767      | 0.1423       |
| OLFML2A      | 0.491833333  | 0.1375       | 0.430566667 | -0.826233333 | -0.8246      |
| SOX2         | -0.005733333 | 0.411633333  | 0.462566667 | -0.812766667 | -0.8885      |
| RBPMS2       | 0.743033333  | 0.725266667  | 0.9858      | -0.629633333 | -0.442033333 |
| SYNM         | 0.251966667  | 0.254066667  | 0.780633333 | -0.928933333 | -0.7594      |
| KLF9         | 0.0918       | 0.6208       | 1.0421      | -1.073133333 | -0.511133333 |
| TCN1         | -0.011266667 | 0.0535       | 0.303366667 | -1.353033333 | -1.2037      |
| IL1RL1       | 1.458466667  | 1.429833333  | 1.219033333 | 0.0516       | 0.234033333  |
| CDKN2C       | 0.7694       | 0.452066667  | 0.840166667 | -0.5571      | -0.7087      |
| SIPA1L2      | 0.964166667  | 0.921266667  | 0.452666667 | -0.471666667 | -0.409733333 |
| TNC          | 1.241        | 0.724266667  | 1.018766667 | -0.2922      | -0.470833333 |
| MAF          | 0.6313       | 0.392066667  | 0.431366667 | -0.841       | -0.8574      |
| VCY          | 0.570866667  | 0.725433333  | 0.809966667 | -0.7484      | -0.712566667 |
| PRRX1        | 0.190266667  | 0.822633333  | 1.455533333 | -0.8538      | -0.746633333 |
| IGFBP5       | -0.049133333 | 0.570666667  | 2.6344      | -0.547866667 | -0.4709      |
| SOX11        | 1.08         | 1.244933333  | 1.996166667 | -0.1821      | -0.110533333 |
| SPANXB2      | 0.507566667  | 0.592633333  | 0.765733333 | -1.106166667 | -0.818       |
| EPHA3        | 0.351966667  | 0.233166667  | 1.1189      | -1.150666667 | -0.936066667 |
| PCOLCE       | 0.812133333  | 0.545333333  | 1.1898      | -0.702733333 | -0.723033333 |
| TNFRSF19     | -0.1592      | 0.351633333  | 1.0613      | -1.470766667 | -1.2604      |
| GAGE12D      | 0.8174       | 1.091966667  | 1.0177      | -0.6599      | -0.731433333 |
| VCX          | 0.880066667  | 0.726833333  | 0.9071      | -0.902766667 | -0.858       |
| VCX3A        | 0.7738       | 0.731166667  | 1.0046      | -0.8479      | -0.827       |
| COL5A1       | 1.098566667  | 0.7144       | 0.8066      | -0.911666667 | -0.879933333 |
| MGP          | -0.0068      | -0.246266667 | 2.345366667 | -1.053766667 | -1.0492      |
| VCX-C        | 0.854366667  | 0.846966667  | 0.882633333 | -0.8541      | -0.932366667 |
| GAGE12E      | 0.9304       | 1.025333333  | 1.146966667 | -0.683833333 | -0.951166667 |
| VCX2         | 0.903066667  | 0.891733333  | 0.917733333 | -1.093666667 | -0.8104      |
| LOC645099    | 1.614266667  | 1.668066667  | 1.515       | -0.447933333 | -0.3836      |
| CCL2         | 0.724333333  | 1.170066667  | 2.3091      | -1.023266667 | -0.8746      |
| GAGE2B       | 0.967933333  | 1.024733333  | 1.151766667 | -1.234366667 | -1.207466667 |
| MEOX2        | 1.001266667  | 1.437266667  | 1.865733333 | -1.077133333 | -0.8587      |
| CKB          | 1.066433333  | 0.921166667  | 1.4546      | -1.226366667 | -1.195266667 |
| GAGE12G      | 1.0698       | 0.939066667  | 1.169166667 | -1.2487      | -1.359366667 |
| GAGE4        | 1.119633333  | 0.915533333  | 1.168       | -1.286666667 | -1.318266667 |
| GAGE5        | 1.050366667  | 1.045733333  | 1.256566667 | -1.2588      | -1.271433333 |
| GAGE12H      | 0.9429       | 1.097433333  | 1.134966667 | -1.287166667 | -1.395533333 |

|           |             |              |             |              |              |
|-----------|-------------|--------------|-------------|--------------|--------------|
| GAGE12I   | 1.009233333 | 1.032166667  | 1.2678      | -1.292866667 | -1.330733333 |
| GAGE12C   | 1.1166      | 1.118066667  | 1.273266667 | -1.265166667 | -1.240233333 |
| LOC645037 | 1.119966667 | 1.114866667  | 1.380533333 | -1.2195      | -1.2023      |
| GAGE12J   | 1.0875      | 1.038366667  | 1.223733333 | -1.3208      | -1.342366667 |
| GAGE8     | 0.981366667 | 1.260933333  | 1.348633333 | -1.362666667 | -1.082333333 |
| HAPLN1    | 1.550533333 | 1.854433333  | 1.640266667 | -0.659433333 | -0.733166667 |
| GAGE6     | 1.0559      | 1.082433333  | 1.399366667 | -1.320233333 | -1.3416      |
| GAGE2E    | 1.141066667 | 1.264833333  | 1.419433333 | -1.3427      | -1.250033333 |
| GAGE2A    | 1.1755      | 1.242366667  | 1.422866667 | -1.2356      | -1.224       |
| GAGE12B   | 1.0058      | 1.171733333  | 1.221566667 | -1.3882      | -1.505066667 |
| GAGE12F   | 1.153633333 | 1.157533333  | 1.44        | -1.284966667 | -1.3895      |
| SERPINA3  | 0.169833333 | -0.465666667 | 1.583033333 | -2.6271      | -2.771466667 |



| A375R sample 3 | average RvS | ratio       |                 |             |
|----------------|-------------|-------------|-----------------|-------------|
| 1.3829         | 2.532533333 | 5.785867694 | 46 >2-fold up   | 0.003690037 |
| 1.001833333    | 2.2171      | 4.649578703 | 65 >2-fold down | 0.005214183 |
| -0.084033333   | 1.738366667 | 3.336572071 |                 |             |
| 0.816433333    | 1.722111111 | 3.299188276 |                 |             |
| 1.201566667    | 1.6779      | 3.199618725 |                 |             |
| 1.115033333    | 1.611055556 | 3.054752627 |                 |             |
| 1.034266667    | 1.609611111 | 3.0516957   |                 |             |
| 0.6059         | 1.583733333 | 2.997445107 |                 |             |
| 0.1546         | 1.549944444 | 2.928058636 |                 |             |
| 1.1646         | 1.505244444 | 2.838727654 |                 |             |
| 0.746533333    | 1.489777778 | 2.808457124 |                 |             |
| 0.814133333    | 1.489222222 | 2.807375846 |                 |             |
| 1.417733333    | 1.434688889 | 2.703238661 |                 |             |
| 1.3583         | 1.428911111 | 2.692434244 |                 |             |
| 0.912466667    | 1.407633333 | 2.653015921 |                 |             |
| 0.401766667    | 1.3516      | 2.551949889 |                 |             |
| 1.106833333    | 1.299288889 | 2.461075452 |                 |             |
| 1.605733333    | 1.284133333 | 2.435357102 |                 |             |
| 0.8131         | 1.277611111 | 2.424372043 |                 |             |
| 0.566366667    | 1.267111111 | 2.406791407 |                 |             |
| 0.7151         | 1.2231      | 2.334478012 |                 |             |
| 0.2848         | 1.210722222 | 2.314534749 |                 |             |
| 1.057566667    | 1.207744444 | 2.309762387 |                 |             |
| 0.830233333    | 1.193733333 | 2.287439099 |                 |             |
| 0.670133333    | 1.190866667 | 2.28289842  |                 |             |
| 0.2862         | 1.142288889 | 2.207309433 |                 |             |
| 0.3494         | 1.136655556 | 2.198707293 |                 |             |
| 1.113233333    | 1.129855556 | 2.188368289 |                 |             |
| 0.847466667    | 1.120788889 | 2.174658538 |                 |             |
| 0.9273         | 1.1194      | 2.172565992 |                 |             |
| 0.3332         | 1.118144444 | 2.170676064 |                 |             |
| 0.240366667    | 1.109555556 | 2.15779163  |                 |             |
| 0.930133333    | 1.105577778 | 2.151850392 |                 |             |
| 1.149933333    | 1.094744444 | 2.13575246  |                 |             |
| 0.8113         | 1.092933333 | 2.13307299  |                 |             |
| 0.7877         | 1.080711111 | 2.115078356 |                 |             |
| 0.646          | 1.077922222 | 2.110993625 |                 |             |
| 0.6666         | 1.050533333 | 2.07129542  |                 |             |
| 0.4422         | 1.050088889 | 2.070657423 |                 |             |
| 0.6623         | 1.048555556 | 2.068457845 |                 |             |
| 1.218666667    | 1.043066667 | 2.060603125 |                 |             |
| 0.463566667    | 1.033877778 | 2.047520332 |                 |             |
| 0.7547         | 1.017666667 | 2.024641769 |                 |             |
| 0.9214         | 1.013444444 | 2.018725071 |                 |             |
| 0.022633333    | 1.0057      | 2.007917508 |                 |             |

|              |             |             |
|--------------|-------------|-------------|
| 0.2483       | 1.001833333 | 2.002543155 |
| 0.377066667  | 0.999111111 | 1.998768118 |
| 0.440466667  | 0.989766667 | 1.985863783 |
| 1.049233333  | 0.986       | 1.980685744 |
| 0.372933333  | 0.983922222 | 1.977835202 |
| 0.2436       | 0.975511111 | 1.966337698 |
| 0.327433333  | 0.971888889 | 1.961406942 |
| 0.605266667  | 0.966488889 | 1.954079128 |
| 0.6606       | 0.947911111 | 1.929077509 |
| 0.5814       | 0.944733333 | 1.924833069 |
| 0.75         | 0.941422222 | 1.920420474 |
| 0.2292       | 0.938177778 | 1.916106536 |
| 0.567966667  | 0.930866667 | 1.906420892 |
| 0.04         | 0.927011111 | 1.901332846 |
| 0.396066667  | 0.906255556 | 1.874174851 |
| 0.588766667  | 0.904255556 | 1.871578493 |
| 0.365533333  | 0.8925      | 1.856390217 |
| 0.522733333  | 0.892       | 1.855746953 |
| 0.724966667  | 0.8908      | 1.854204028 |
| 0.314833333  | 0.889966667 | 1.853133307 |
| 0.500733333  | 0.887022222 | 1.849355042 |
| 0.168833333  | 0.883222222 | 1.844490326 |
| 0.555466667  | 0.879655556 | 1.839935963 |
| 0.534933333  | 0.878822222 | 1.838873481 |
| 0.271366667  | 0.873544444 | 1.832158663 |
| 0.0703       | 0.871311111 | 1.829324623 |
| 0.466333333  | 0.869055556 | 1.826466833 |
| 0.348633333  | 0.868411111 | 1.825651141 |
| -0.056633333 | 0.868244444 | 1.825440246 |
| 0.247333333  | 0.863366667 | 1.819278822 |
| 0.453133333  | 0.858611111 | 1.813291806 |
| 0.044066667  | 0.842211111 | 1.792795722 |
| 0.815433333  | 0.840811111 | 1.791056826 |
| -0.052533333 | 0.840355556 | 1.790491358 |
| 0.7528       | 0.832766667 | 1.781097713 |
| 0.2481       | 0.830022222 | 1.777712745 |
| 0.0907       | 0.829177778 | 1.776672511 |
| 0.2098       | 0.827111111 | 1.774129242 |
| 0.319866667  | 0.825811111 | 1.77253131  |
| 0.687366667  | 0.822044444 | 1.767909524 |
| 0.545766667  | 0.821422222 | 1.767147204 |
| 0.0392       | 0.816222222 | 1.760789225 |
| 0.4373       | 0.799088889 | 1.740001909 |
| 0.1987       | 0.794933333 | 1.734997199 |
| 0.9292       | 0.788955556 | 1.727823146 |
| 0.4146       | 0.788288889 | 1.727024906 |
| 0.305833333  | 0.7817      | 1.719155447 |

|              |             |             |
|--------------|-------------|-------------|
| 0.4102       | 0.773666667 | 1.709609307 |
| 0.147766667  | 0.769633333 | 1.704836438 |
| 0.3603       | 0.763966667 | 1.698153257 |
| 0.2216       | 0.761444444 | 1.695187018 |
| 0.356366667  | 0.755444444 | 1.688151573 |
| 0.371133333  | 0.753166667 | 1.685488363 |
| 0.213666667  | 0.752788889 | 1.685047066 |
| 0.328866667  | 0.751466667 | 1.683503437 |
| 0.185166667  | 0.7507      | 1.682609039 |
| 0.308133333  | 0.749344444 | 1.681028803 |
| 0.3936       | 0.749111111 | 1.680756945 |
| -0.195633333 | 0.746833333 | 1.678105401 |
| 0.209466667  | 0.746233333 | 1.677407641 |
| 0.175666667  | 0.746066667 | 1.677213871 |
| 0.323        | 0.736655556 | 1.666308535 |
| 0.4289       | 0.735833333 | 1.665359141 |
| -0.1899      | 0.735777778 | 1.665295012 |
| 0.452733333  | 0.735722222 | 1.665230886 |
| 0.464366667  | 0.735455556 | 1.664923114 |
| 0.275333333  | 0.730155556 | 1.658817941 |
| 0.192033333  | 0.729488889 | 1.658051581 |
| 0.611133333  | 0.726577778 | 1.654709291 |
| 0.490833333  | 0.720844444 | 1.648146452 |
| -0.105233333 | 0.720244444 | 1.64746115  |
| 0.530633333  | 0.719122222 | 1.646180146 |
| 0.178766667  | 0.718877778 | 1.645901247 |
| 0.377033333  | 0.718133333 | 1.645052166 |
| 0.081866667  | 0.717844444 | 1.644722789 |
| 0.259133333  | 0.715677778 | 1.642254567 |
| 0.4246       | 0.710666667 | 1.636560194 |
| 0.311866667  | 0.710377778 | 1.636232518 |
| 0.0536       | 0.706477778 | 1.631815306 |
| 0.1216       | 0.702922222 | 1.627798611 |
| 0.2234       | 0.701433333 | 1.626119558 |
| 0.354833333  | 0.700577778 | 1.625155513 |
| 0.069033333  | 0.700388889 | 1.624942749 |
| 0.499833333  | 0.699066667 | 1.62345418  |
| 0.164366667  | 0.695644444 | 1.619607742 |
| 0.344833333  | 0.693788889 | 1.617525985 |
| -0.619933333 | 0.6934      | 1.617090028 |
| 0.233633333  | 0.691722222 | 1.615210531 |
| 0.098666667  | 0.691233333 | 1.614663274 |
| 0.2094       | 0.689855556 | 1.613122003 |
| -0.0919      | 0.688022222 | 1.611073398 |
| 0.416766667  | 0.685066667 | 1.607776275 |
| 0.0543       | 0.682044444 | 1.604411758 |
| 0.3757       | 0.6772      | 1.599033318 |

|              |             |             |
|--------------|-------------|-------------|
| 0.0919       | 0.676466667 | 1.598220724 |
| 0.437433333  | 0.673322222 | 1.594741095 |
| 0.2673       | 0.671722222 | 1.592973451 |
| 0.225433333  | 0.669955556 | 1.591023953 |
| -0.044533333 | 0.669266667 | 1.590264418 |
| 0.193166667  | 0.669111111 | 1.59009296  |
| 0.535133333  | 0.667388889 | 1.588195914 |
| 0.157866667  | 0.663622222 | 1.584054774 |
| 0.359133333  | 0.6635      | 1.583920582 |
| 0.444766667  | 0.662966667 | 1.583335149 |
| 0.275966667  | 0.660855556 | 1.581019932 |
| 0.372333333  | 0.659655556 | 1.579705423 |
| 0.297633333  | 0.658588889 | 1.578537888 |
| -0.043       | 0.655855556 | 1.575550018 |
| 0.408566667  | 0.655622222 | 1.575295218 |
| 0.220666667  | 0.653066667 | 1.572507248 |
| 0.277766667  | 0.651311111 | 1.570594893 |
| 0.4077       | 0.649822222 | 1.568974845 |
| 0.3381       | 0.648022222 | 1.567018511 |
| 0.329566667  | 0.645722222 | 1.5645223   |
| 0.598433333  | 0.643988889 | 1.562643725 |
| 0.3727       | 0.642822222 | 1.56138057  |
| 0.248666667  | 0.639144444 | 1.557405304 |
| 0.367433333  | 0.634877778 | 1.552806194 |
| 4.00E-04     | 0.634444444 | 1.552339857 |
| 0.341366667  | 0.634288889 | 1.552172488 |
| 0.416166667  | 0.633966667 | 1.551825853 |
| 0.6209       | 0.633755556 | 1.55159879  |
| 0.639033333  | 0.629811111 | 1.547362388 |
| 1.098566667  | 0.629177778 | 1.546683255 |
| 1.180466667  | 0.628755556 | 1.546230666 |
| 0.197833333  | 0.628655556 | 1.546123493 |
| 0.4181       | 0.628144444 | 1.545575837 |
| 0.2525       | 0.626711111 | 1.544041053 |
| 0.6961       | 0.626466667 | 1.543779459 |
| 0.379333333  | 0.625788889 | 1.543054362 |
| 0.477633333  | 0.625533333 | 1.542781053 |
| 0.3438       | 0.624188889 | 1.541344008 |
| 0.368966667  | 0.618688889 | 1.535479114 |
| 0.080433333  | 0.618666667 | 1.535455463 |
| 0.298866667  | 0.618233333 | 1.534994337 |
| 0.4579       | 0.616988889 | 1.533670848 |
| 0.379233333  | 0.6161      | 1.532726197 |
| 0.2382       | 0.613588889 | 1.530060701 |
| 0.3831       | 0.613411111 | 1.529872169 |
| 0.007833333  | 0.612666667 | 1.529082944 |
| 0.2979       | 0.611844444 | 1.528211736 |

|             |             |             |
|-------------|-------------|-------------|
| 0.3505      | 0.6117      | 1.528058737 |
| 0.305266667 | 0.608433333 | 1.524602697 |
| 0.068166667 | 0.6077      | 1.523827926 |
| 0.3445      | 0.607055556 | 1.523147392 |
| 0.3044      | 0.605822222 | 1.521845838 |
| 0.307366667 | 0.605566667 | 1.521576286 |
| 0.114333333 | 0.605388889 | 1.521388799 |
| 0.118666667 | 0.603444444 | 1.519339674 |
| 0.0959      | 0.602777778 | 1.518637752 |
| 0.195266667 | 0.602077778 | 1.517901083 |
| 0.2623      | 0.601466667 | 1.517258252 |
| 0.222533333 | 0.597822222 | 1.513430287 |
| -0.1347     | 0.597611111 | 1.513208842 |
| 0.749233333 | 0.596377778 | 1.51191578  |
| 0.058666667 | 0.594455556 | 1.509902671 |
| 0.332333333 | 0.594066667 | 1.50949572  |
| 0.257533333 | 0.588488889 | 1.503670944 |
| 0.550766667 | 0.585911111 | 1.500986614 |
| 0.328533333 | 0.583577778 | 1.498560966 |
| 0.1296      | 0.583466667 | 1.498445556 |
| 0.2981      | 0.581944444 | 1.496865344 |
| 0.1613      | 0.581177778 | 1.496070102 |
| -0.015      | 0.580711111 | 1.495586248 |
| 0.4084      | 0.580566667 | 1.495436516 |
| 0.4276      | 0.578677778 | 1.493479855 |
| 0.305       | 0.578588889 | 1.49338784  |
| 0.257666667 | 0.5769      | 1.49164063  |
| 0.2532      | 0.576611111 | 1.49134197  |
| 0.2946      | 0.574055556 | 1.488702581 |
| 0.3923      | 0.572466667 | 1.487063925 |
| 0.451766667 | 0.572222222 | 1.486811984 |
| 0.364966667 | 0.5715      | 1.486067863 |
| 0.074633333 | 0.5714      | 1.48596486  |
| 0.130733333 | 0.564       | 1.478362431 |
| 0.149366667 | 0.562855556 | 1.477190158 |
| 0.453133333 | 0.562155556 | 1.476473595 |
| 0.3819      | 0.559722222 | 1.473985388 |
| 0.3018      | 0.559588889 | 1.473849169 |
| 0.090266667 | 0.557277778 | 1.471490041 |
| 0.159933333 | 0.556288889 | 1.47048176  |
| 0.332466667 | 0.555911111 | 1.470096756 |
| 0.216533333 | 0.555844444 | 1.470028825 |
| 0.313533333 | 0.554511111 | 1.468670858 |
| 0.1964      | 0.5544      | 1.46855775  |
| 0.3605      | 0.552966667 | 1.467099447 |
| 0.3478      | 0.552533333 | 1.466658849 |
| 0.1618      | 0.550888889 | 1.464988042 |

|              |             |             |
|--------------|-------------|-------------|
| 0.357833333  | 0.550422222 | 1.464514241 |
| 0.299066667  | 0.549422222 | 1.463499469 |
| 0.141433333  | 0.547722222 | 1.46177597  |
| 0.253966667  | 0.547533333 | 1.461584595 |
| 0.102233333  | 0.543122222 | 1.457122553 |
| 0.271133333  | 0.541711111 | 1.455698027 |
| -0.1577      | 0.538566667 | 1.452528697 |
| 0.3346       | 0.5375      | 1.451455157 |
| 0.337633333  | 0.537044444 | 1.450996907 |
| 0.2397       | 0.536611111 | 1.450561146 |
| 0.451766667  | 0.536011111 | 1.449958    |
| 0.4205       | 0.535688889 | 1.449634192 |
| 0.536266667  | 0.535344444 | 1.449288132 |
| 0.300133333  | 0.534677778 | 1.448618573 |
| -0.0109      | 0.534355556 | 1.448295064 |
| 0.125233333  | 0.533055556 | 1.446990606 |
| -0.021266667 | 0.532588889 | 1.446522625 |
| 0.196833333  | 0.532566667 | 1.446500344 |
| 0.1033       | 0.531833333 | 1.445765264 |
| 0.3756       | 0.531766667 | 1.445698457 |
| 0.522833333  | 0.531455556 | 1.445386731 |
| 0.132433333  | 0.531       | 1.444930398 |
| 0.355333333  | 0.530966667 | 1.444897013 |
| 0.6493       | 0.529611111 | 1.443540026 |
| 0.348066667  | 0.528311111 | 1.442239851 |
| 0.1443       | 0.5283      | 1.442228743 |
| 0.344166667  | 0.527788889 | 1.441717888 |
| 0.3142       | 0.527722222 | 1.441651268 |
| 0.2815       | 0.527488889 | 1.441418122 |
| 0.1637       | 0.526777778 | 1.440707816 |
| 0.751466667  | 0.526266667 | 1.440197499 |
| 0.149866667  | 0.525755556 | 1.439687363 |
| 0.486733333  | 0.5248      | 1.438734115 |
| 0.429        | 0.524144444 | 1.438080508 |
| 0.086233333  | 0.523711111 | 1.437648626 |
| 0.5892       | 0.523566667 | 1.437504694 |
| 0.026466667  | 0.521188889 | 1.435137422 |
| 0.432933333  | 0.520622222 | 1.434573834 |
| 0.452366667  | 0.519366667 | 1.43332589  |
| 0.311933333  | 0.518988889 | 1.432950614 |
| 0.325866667  | 0.516222222 | 1.430205268 |
| 0.504766667  | 0.514577778 | 1.428575988 |
| 0.3774       | 0.514433333 | 1.428432965 |
| 0.3288       | 0.514288889 | 1.428289955 |
| 0.279833333  | 0.514066667 | 1.428069969 |
| -0.000166667 | 0.513488889 | 1.427498163 |
| 0.095766667  | 0.512811111 | 1.426827682 |

|              |             |             |
|--------------|-------------|-------------|
| -0.138233333 | 0.510722222 | 1.424763263 |
| 0.203133333  | 0.509877778 | 1.423929558 |
| -0.035366667 | 0.509322222 | 1.423381334 |
| 0.182566667  | 0.508022222 | 1.422099315 |
| 0.25         | 0.506611111 | 1.420709029 |
| 0.284233333  | 0.506222222 | 1.420326118 |
| 0.275833333  | 0.5062      | 1.420304241 |
| 0.2517       | 0.505755556 | 1.419866762 |
| 0.1459       | 0.505       | 1.419123356 |
| 0.1203       | 0.5041      | 1.418238337 |
| 0.2437       | 0.503433333 | 1.417583123 |
| 0.015833333  | 0.502777778 | 1.416939125 |
| 0.154266667  | 0.500622222 | 1.414823632 |
| 0.468933333  | 0.500188889 | 1.414398734 |
| -0.156433333 | 0.497655556 | 1.411917268 |
| 0.4027       | 0.496633333 | 1.410917208 |
| 0.4068       | 0.495744444 | 1.410048166 |
| 0.531333333  | 0.4957      | 1.410004728 |
| 0.0109       | 0.4943      | 1.408637114 |
| 0.206533333  | 0.494255556 | 1.40859372  |
| 0.064533333  | 0.493855556 | 1.408203229 |
| 0.1511       | 0.4938      | 1.408149002 |
| 0.353666667  | 0.492       | 1.4063932   |
| 0.1578       | 0.490811111 | 1.405234704 |
| 0.1573       | 0.490655556 | 1.405083196 |
| 0.111533333  | 0.490444444 | 1.404877603 |
| 0.150666667  | 0.490344444 | 1.404780228 |
| 0.467566667  | 0.490155556 | 1.404596315 |
| 0.183133333  | 0.4895      | 1.403958217 |
| 0.035466667  | 0.487711111 | 1.402218439 |
| -0.216833333 | 0.4855      | 1.400071009 |
| 0.177566667  | 0.483966667 | 1.398583768 |
| 0.411666667  | 0.483277778 | 1.397916102 |
| 0.527866667  | 0.483066667 | 1.397711558 |
| 0.269033333  | 0.481677778 | 1.396366623 |
| 0.1464       | 0.480222222 | 1.394958519 |
| 0.697833333  | 0.480055556 | 1.394797376 |
| 0.159766667  | 0.479022222 | 1.393798708 |
| -0.067433333 | 0.478922222 | 1.3937021   |
| 0.319333333  | 0.477611111 | 1.392436089 |
| 0.524733333  | 0.477211111 | 1.392050077 |
| 0.1849       | 0.477022222 | 1.391867831 |
| 0.420933333  | 0.475688889 | 1.390582066 |
| 0.118366667  | 0.474355556 | 1.389297489 |
| 0.306766667  | 0.4742      | 1.389147699 |
| 0.656466667  | 0.473988889 | 1.388944439 |
| 0.338566667  | 0.473544444 | 1.388516619 |

|              |             |             |
|--------------|-------------|-------------|
| 0.124366667  | 0.472977778 | 1.38797134  |
| 0.0568       | 0.472966667 | 1.38796065  |
| 0.1081       | 0.472077778 | 1.387105748 |
| 0.4271       | 0.471777778 | 1.386817337 |
| 0.308133333  | 0.471066667 | 1.386133937 |
| 0.048633333  | 0.470977778 | 1.386048536 |
| 0.214466667  | 0.470944444 | 1.386016512 |
| 0.1971       | 0.470788889 | 1.385867075 |
| 0.323033333  | 0.470544444 | 1.385632228 |
| 0.357866667  | 0.469566667 | 1.384693494 |
| 0.3519       | 0.469344444 | 1.384480222 |
| 0.270866667  | 0.469222222 | 1.384362937 |
| 0.424566667  | 0.468311111 | 1.38348894  |
| 0.108766667  | 0.468222222 | 1.383403702 |
| 0.3884       | 0.468066667 | 1.383254547 |
| 0.184733333  | 0.467688889 | 1.382892382 |
| 0.3616       | 0.466755556 | 1.381998027 |
| 0.230033333  | 0.465711111 | 1.380997886 |
| 0.183333333  | 0.4653      | 1.380604412 |
| 0.513533333  | 0.464855556 | 1.380179161 |
| 0.177333333  | 0.464355556 | 1.37970091  |
| 0.0363       | 0.463777778 | 1.379148471 |
| 0.2745       | 0.463122222 | 1.378521934 |
| 0.2983       | 0.462355556 | 1.377789564 |
| -0.325733333 | 0.461277778 | 1.376760659 |
| 0.104        | 0.459911111 | 1.375457069 |
| 0.1861       | 0.459877778 | 1.37542529  |
| 0.4251       | 0.458555556 | 1.374165298 |
| -0.335633333 | 0.458266667 | 1.373890159 |
| 0.4775       | 0.458222222 | 1.373847835 |
| 0.2793       | 0.456733333 | 1.372430729 |
| 0.049066667  | 0.455922222 | 1.371659338 |
| 0.272833333  | 0.4558      | 1.371543139 |
| 0.337466667  | 0.455677778 | 1.37142695  |
| 0.419433333  | 0.4545      | 1.37030781  |
| 0.446933333  | 0.4532      | 1.369073594 |
| 0.363366667  | 0.4529      | 1.368788933 |
| 0.262333333  | 0.452077778 | 1.368009053 |
| 0.4811       | 0.4517      | 1.367650879 |
| 0.015433333  | 0.4512      | 1.36717697  |
| 0.1366       | 0.450933333 | 1.366924285 |
| 0.157433333  | 0.450733333 | 1.366734802 |
| 0.471366667  | 0.450255556 | 1.366282255 |
| 0.2744       | 0.449633333 | 1.365693116 |
| 0.035366667  | 0.4494      | 1.365472255 |
| 0.130233333  | 0.449244444 | 1.365325033 |
| 0.366733333  | 0.449011111 | 1.365104231 |



|              |             |             |
|--------------|-------------|-------------|
| 0.1559       | 0.448633333 | 1.364746818 |
| 0.033066667  | 0.446711111 | 1.362929663 |
| -0.1717      | 0.446211111 | 1.36245739  |
| 0.172666667  | 0.445988889 | 1.362247543 |
| 0.0904       | 0.445355556 | 1.361649657 |
| 0.1744       | 0.445122222 | 1.361429449 |
| 0.156033333  | 0.444233333 | 1.360590889 |
| 0.1802       | 0.444122222 | 1.360486105 |
| 0.153366667  | 0.443322222 | 1.359731901 |
| 0.023166667  | 0.442777778 | 1.359218862 |
| 0.0012       | 0.442411111 | 1.358873455 |
| 0.156133333  | 0.441955556 | 1.358444435 |
| -0.1071      | 0.441744444 | 1.358245667 |
| 0.4266       | 0.441611111 | 1.358120144 |
| 0.273433333  | 0.441033333 | 1.357576346 |
| 0.2254       | 0.440833333 | 1.357388159 |
| 0.470833333  | 0.440377778 | 1.356959608 |
| 0.3784       | 0.438744444 | 1.355424209 |
| 0.2376       | 0.438277778 | 1.354985843 |
| 0.0597       | 0.438055556 | 1.354777146 |
| 0.354        | 0.437522222 | 1.354276407 |
| 0.110766667  | 0.437155556 | 1.353932256 |
| 0.3458       | 0.436966667 | 1.353755    |
| 0.0976       | 0.4367      | 1.353504796 |
| 0.173833333  | 0.436388889 | 1.35321295  |
| 0.183133333  | 0.436211111 | 1.353046209 |
| 0.392933333  | 0.436077778 | 1.352921167 |
| 0.462166667  | 0.436066667 | 1.352910747 |
| 0.1105       | 0.435411111 | 1.352296129 |
| 0.121866667  | 0.432933333 | 1.349975602 |
| 0.3791       | 0.432644444 | 1.349705306 |
| 0.160766667  | 0.432633333 | 1.349694911 |
| 0.129733333  | 0.432166667 | 1.349258398 |
| 0.251533333  | 0.432155556 | 1.349248006 |
| 0.194466667  | 0.432111111 | 1.349206441 |
| 0.1583       | 0.432044444 | 1.349144096 |
| 0.2047       | 0.431677778 | 1.348801249 |
| 0.1889       | 0.430855556 | 1.348032758 |
| 0.270266667  | 0.430844444 | 1.348022376 |
| 0.224333333  | 0.430577778 | 1.347773232 |
| 0.285133333  | 0.430488889 | 1.347690194 |
| 0.199166667  | 0.4282      | 1.345553729 |
| 0.142766667  | 0.427511111 | 1.344911379 |
| 0.127066667  | 0.427433333 | 1.344838874 |
| 0.415566667  | 0.426444444 | 1.343917376 |
| -0.030333333 | 0.426177778 | 1.343668991 |
| 0.044333333  | 0.426177778 | 1.343668991 |

|              |             |             |
|--------------|-------------|-------------|
| 0.018333333  | 0.425755556 | 1.343275807 |
| 0.0085       | 0.425455556 | 1.34299651  |
| 0.1215       | 0.424755556 | 1.342345042 |
| 0.269566667  | 0.424144444 | 1.341776559 |
| 0.380266667  | 0.4238      | 1.341456247 |
| -0.007033333 | 0.423266667 | 1.340960431 |
| 0.216966667  | 0.422922222 | 1.340640314 |
| 0.0325       | 0.421877778 | 1.339670103 |
| 0.229033333  | 0.421255556 | 1.33909244  |
| 0.252866667  | 0.4205      | 1.338391326 |
| -0.011233333 | 0.419944444 | 1.337876035 |
| 0.0022       | 0.419688889 | 1.337639067 |
| 0.2663       | 0.419544444 | 1.337505148 |
| 0.351433333  | 0.4185      | 1.336537207 |
| 0.149566667  | 0.4183      | 1.336351936 |
| -0.131066667 | 0.417877778 | 1.335960894 |
| 0.160533333  | 0.416866667 | 1.335024915 |
| 0.147666667  | 0.416777778 | 1.334942663 |
| 0.050666667  | 0.416688889 | 1.334860415 |
| 0.2628       | 0.416122222 | 1.334336207 |
| 0.342966667  | 0.416022222 | 1.334243721 |
| 0.528366667  | 0.415477778 | 1.333740299 |
| 0.282533333  | 0.415422222 | 1.33368894  |
| -0.1507      | 0.415266667 | 1.333545146 |
| 0.3679       | 0.414322222 | 1.332672441 |
| 0.189166667  | 0.413633333 | 1.33203624  |
| 0.066366667  | 0.411511111 | 1.330078238 |
| 0.140033333  | 0.411333333 | 1.329914348 |
| -0.3285      | 0.410122222 | 1.328798382 |
| -0.0997      | 0.410077778 | 1.328757447 |
| 0.175933333  | 0.409644444 | 1.328358397 |
| 0.344866667  | 0.4092      | 1.327949238 |
| 0.296566667  | 0.409177778 | 1.327928784 |
| 0.175166667  | 0.408844444 | 1.327622003 |
| 0.707633333  | 0.408022222 | 1.326865579 |
| -0.004433333 | 0.407688889 | 1.326559043 |
| 0.2528       | 0.407433333 | 1.32632408  |
| 0.154466667  | 0.406755556 | 1.32570112  |
| 0.1029       | 0.406111111 | 1.325109068 |
| 0.235966667  | 0.406033333 | 1.325037632 |
| 0.004533333  | 0.405966667 | 1.324976403 |
| 0.217766667  | 0.4055      | 1.324547884 |
| 0.8803       | 0.4054      | 1.324456077 |
| 0.167333333  | 0.405111111 | 1.324190891 |
| -0.038266667 | 0.404744444 | 1.323854385 |
| 0.340633333  | 0.404744444 | 1.323854385 |
| 0.086033333  | 0.404311111 | 1.323456807 |

|              |             |             |
|--------------|-------------|-------------|
| 0.727133333  | 0.403766667 | 1.322957455 |
| 0.277333333  | 0.403588889 | 1.322794442 |
| 0.219333333  | 0.403088889 | 1.322336076 |
| 0.1125       | 0.402544444 | 1.321837147 |
| 0.192833333  | 0.4021      | 1.321429997 |
| 0.068066667  | 0.401922222 | 1.321267172 |
| 0.6747       | 0.401677778 | 1.321043321 |
| 0.2424       | 0.401555556 | 1.32093141  |
| 0.143966667  | 0.4011      | 1.320514369 |
| 0.6059       | 0.401055556 | 1.320473689 |
| 0.137033333  | 0.400422222 | 1.319894137 |
| 0.324333333  | 0.400333333 | 1.319812817 |
| -0.009866667 | 0.399566667 | 1.319111638 |
| 0.1475       | 0.399122222 | 1.318705328 |
| 0.490033333  | 0.398477778 | 1.3181164   |
| 0.034366667  | 0.398177778 | 1.317842334 |
| 0.0686       | 0.396644444 | 1.316442442 |
| 0.239333333  | 0.396477778 | 1.316290369 |
| 0.136466667  | 0.395966667 | 1.315824123 |
| 0.073266667  | 0.395855556 | 1.315722787 |
| 0.297633333  | 0.3945      | 1.314487115 |
| 0.239633333  | 0.394188889 | 1.314203682 |
| -0.028733333 | 0.394155556 | 1.314173317 |
| 0.113233333  | 0.393966667 | 1.314001267 |
| 0.249166667  | 0.3927      | 1.312848098 |
| 0.227366667  | 0.391333333 | 1.311605024 |
| -0.235666667 | 0.391266667 | 1.311544417 |
| -0.165166667 | 0.390188889 | 1.310564982 |
| 0.094866667  | 0.389355556 | 1.309808189 |
| 0.121333333  | 0.389077778 | 1.309556021 |
| 0.8534       | 0.387888889 | 1.308477293 |
| 0.279166667  | 0.387866667 | 1.308457139 |
| 0.109966667  | 0.387266667 | 1.30791308  |
| 0.0146       | 0.386722222 | 1.307419593 |
| -0.1209      | 0.386544444 | 1.307258494 |
| 0.094833333  | 0.385655556 | 1.3064533   |
| 0.055566667  | 0.385622222 | 1.306423115 |
| 0.295        | 0.385266667 | 1.306101184 |
| 0.144833333  | 0.385188889 | 1.306030772 |
| 0.264566667  | 0.384855556 | 1.305729049 |
| 0.143166667  | 0.384433333 | 1.305346968 |
| 0.0692       | 0.384166667 | 1.305105711 |
| 0.025266667  | 0.383722222 | 1.304703715 |
| -0.1422      | 0.383577778 | 1.304573093 |
| 0.130833333  | 0.383433333 | 1.304442484 |
| 0.2806       | 0.382111111 | 1.303247517 |
| 0.218633333  | 0.381533333 | 1.30272569  |

|              |             |             |
|--------------|-------------|-------------|
| 0.056433333  | 0.381444444 | 1.302645428 |
| 0.076833333  | 0.381166667 | 1.302394639 |
| 0.229566667  | 0.381       | 1.30224419  |
| 0.185066667  | 0.380311111 | 1.301622515 |
| 0.296633333  | 0.3799      | 1.301251656 |
| 0.200966667  | 0.379655556 | 1.301031196 |
| 0.162666667  | 0.379522222 | 1.300910961 |
| -0.261266667 | 0.379433333 | 1.30083081  |
| 0.073066667  | 0.379233333 | 1.300650489 |
| 0.109633333  | 0.378222222 | 1.299739249 |
| 0.112866667  | 0.378166667 | 1.2996892   |
| 0.280066667  | 0.377522222 | 1.299108765 |
| 0.048733333  | 0.3775      | 1.299088755 |
| 0.2807       | 0.377144444 | 1.298768631 |
| 0.1816       | 0.3771      | 1.298728621 |
| 0.0958       | 0.376911111 | 1.298558592 |
| 0.261533333  | 0.376722222 | 1.298388586 |
| 0.158666667  | 0.376688889 | 1.298358587 |
| 0.527566667  | 0.376588889 | 1.298268595 |
| 0.2603       | 0.376255556 | 1.297968666 |
| 0.3641       | 0.375711111 | 1.29747893  |
| 0.1951       | 0.375577778 | 1.297359024 |
| 0.102833333  | 0.375155556 | 1.296979391 |
| -0.1846      | 0.374777778 | 1.296639814 |
| 0.366533333  | 0.373633333 | 1.295611639 |
| 0.087566667  | 0.373577778 | 1.295561748 |
| 0.132933333  | 0.373477778 | 1.29547195  |
| 0.2795       | 0.373111111 | 1.295142742 |
| 0.224366667  | 0.372466667 | 1.294564338 |
| 0.1841       | 0.372255556 | 1.294374917 |
| 0.511866667  | 0.372233333 | 1.294354979 |
| 0.196433333  | 0.372033333 | 1.294175556 |
| 0.2907       | 0.372011111 | 1.294155622 |
| 0.136866667  | 0.371966667 | 1.294115754 |
| 0.069766667  | 0.371855556 | 1.294016089 |
| 0.197033333  | 0.371722222 | 1.293896503 |
| 0.164966667  | 0.3716      | 1.293786891 |
| 1.0338       | 0.371111111 | 1.293348537 |
| 0.218566667  | 0.371055556 | 1.293298734 |
| 0.182633333  | 0.370933333 | 1.293189172 |
| 0.253433333  | 0.370377778 | 1.292691285 |
| 0.3146       | 0.370111111 | 1.292452367 |
| -0.097666667 | 0.370088889 | 1.292432459 |
| 0.3243       | 0.370033333 | 1.292382691 |
| 0.141866667  | 0.369655556 | 1.292044317 |
| 0.1444       | 0.3696      | 1.291994564 |
| 0.279366667  | 0.369455556 | 1.291865214 |

|              |             |             |
|--------------|-------------|-------------|
| 0.340933333  | 0.369222222 | 1.291656292 |
| -0.1051      | 0.369022222 | 1.291477243 |
| 0.094433333  | 0.368555556 | 1.291059558 |
| 0.2539       | 0.368377778 | 1.290900476 |
| 0.099333333  | 0.368155556 | 1.29070165  |
| 0.204066667  | 0.368122222 | 1.290671829 |
| 0.257466667  | 0.366688889 | 1.289390169 |
| 0.1761       | 0.366322222 | 1.289062507 |
| 0.078333333  | 0.366122222 | 1.288883818 |
| 0.179133333  | 0.366011111 | 1.288784556 |
| 0.210866667  | 0.365533333 | 1.28835782  |
| 0.1448       | 0.364955556 | 1.287841955 |
| 0.0467       | 0.364433333 | 1.28737587  |
| 0.212333333  | 0.364366667 | 1.287316382 |
| 0.116733333  | 0.364177778 | 1.287147848 |
| 0.0468       | 0.364155556 | 1.287128022 |
| 0.096833333  | 0.363988889 | 1.286979335 |
| -0.076833333 | 0.363677778 | 1.286701834 |
| -0.112166667 | 0.363233333 | 1.286305506 |
| 0.153533333  | 0.362988889 | 1.286087578 |
| 0.260333333  | 0.362822222 | 1.285939012 |
| -0.156066667 | 0.362344444 | 1.285513218 |
| 0.2289       | 0.362222222 | 1.285404317 |
| -0.039466667 | 0.362155556 | 1.28534492  |
| 0.310366667  | 0.362055556 | 1.285255829 |
| 0.320733333  | 0.3618      | 1.285028182 |
| 0.023066667  | 0.361433333 | 1.284701629 |
| 0.2623       | 0.360744444 | 1.284088329 |
| 0.293766667  | 0.360588889 | 1.283949882 |
| 0.121733333  | 0.360411111 | 1.283791675 |
| 0.1868       | 0.360311111 | 1.283702693 |
| 0.177433333  | 0.360277778 | 1.283673033 |
| 0.287333333  | 0.359788889 | 1.283238106 |
| 0.088466667  | 0.359166667 | 1.282684776 |
| 0.427133333  | 0.359011111 | 1.28254648  |
| 0.163166667  | 0.359011111 | 1.28254648  |
| 0.068566667  | 0.357944444 | 1.281598571 |
| 0.051266667  | 0.357866667 | 1.28152948  |
| -0.012533333 | 0.357755556 | 1.281430785 |
| 0.263266667  | 0.3568      | 1.280582323 |
| 0.149666667  | 0.356044444 | 1.279911843 |
| 0.229066667  | 0.355511111 | 1.279438774 |
| 0.104066667  | 0.355411111 | 1.279350094 |
| 0.428533333  | 0.354488889 | 1.278532549 |
| 0.3958       | 0.353911111 | 1.278020618 |
| 0.158166667  | 0.353777778 | 1.277902509 |
| 0.097433333  | 0.353588889 | 1.277735207 |

|              |             |             |
|--------------|-------------|-------------|
| 0.607833333  | 0.353477778 | 1.277636805 |
| 0.187033333  | 0.352755556 | 1.276997372 |
| 0.280666667  | 0.352511111 | 1.276781021 |
| -0.041533333 | 0.352455556 | 1.276731855 |
| 0.1087       | 0.351988889 | 1.276318939 |
| 0.263666667  | 0.351877778 | 1.276220645 |
| 0.2064       | 0.3518      | 1.276151844 |
| 0.053033333  | 0.351144444 | 1.275572097 |
| 0.128166667  | 0.350666667 | 1.275149735 |
| 0.221333333  | 0.350066667 | 1.274619526 |
| 0.181766667  | 0.3497      | 1.274295617 |
| 0.069833333  | 0.349511111 | 1.274128788 |
| 0.221766667  | 0.349388889 | 1.274020851 |
| 0.031466667  | 0.349311111 | 1.273952168 |
| 0.059233333  | 0.348944444 | 1.273628429 |
| -0.164833333 | 0.348911111 | 1.273599003 |
| 0.0977       | 0.348488889 | 1.273226323 |
| 0.153366667  | 0.348388889 | 1.273138073 |
| -0.019166667 | 0.348344444 | 1.273098852 |
| 0.231566667  | 0.348222222 | 1.272991002 |
| 0.144666667  | 0.347188889 | 1.272079546 |
| -0.071366667 | 0.346522222 | 1.271491857 |
| 0.1385       | 0.346388889 | 1.271374351 |
| 0.2811       | 0.346233333 | 1.271237275 |
| 0.264433333  | 0.346088889 | 1.271110004 |
| 0.1319       | 0.3457      | 1.270767413 |
| 0.238433333  | 0.3456      | 1.270679333 |
| 0.124866667  | 0.345544444 | 1.270630403 |
| 0.250533333  | 0.344744444 | 1.269926011 |
| 0.143        | 0.344155556 | 1.26940775  |
| 0.196566667  | 0.344077778 | 1.269339316 |
| 0.172633333  | 0.343855556 | 1.269143811 |
| 0.2264       | 0.343677778 | 1.268987429 |
| 0.0429       | 0.343133333 | 1.268508629 |
| 0.003833333  | 0.342577778 | 1.268020243 |
| 0.217533333  | 0.342555556 | 1.268000712 |
| 0.285633333  | 0.341988889 | 1.26750276  |
| 0.052033333  | 0.341866667 | 1.267395384 |
| 0.412033333  | 0.341533333 | 1.267102588 |
| 0.1403       | 0.341377778 | 1.266965972 |
| 0.218933333  | 0.341122222 | 1.266741565 |
| 0.072333333  | 0.340644444 | 1.266322127 |
| -0.012966667 | 0.340566667 | 1.26625386  |
| 0.2269       | 0.340344444 | 1.26605883  |
| -0.194133333 | 0.340266667 | 1.265990577 |
| 0.2053       | 0.3401      | 1.265844333 |
| 0.041833333  | 0.340055556 | 1.265805337 |

|              |             |             |
|--------------|-------------|-------------|
| -0.097       | 0.339977778 | 1.265737097 |
| 0.072433333  | 0.339611111 | 1.265415446 |
| 0.1118       | 0.339566667 | 1.265376464 |
| 0.182866667  | 0.339222222 | 1.26507439  |
| 0.132333333  | 0.338988889 | 1.264869801 |
| 0.034033333  | 0.3383      | 1.264265968 |
| -0.016433333 | 0.338211111 | 1.264188075 |
| 0.0375       | 0.337922222 | 1.263934956 |
| 0.036733333  | 0.337711111 | 1.263750017 |
| 0.0706       | 0.337477778 | 1.263545641 |
| 0.1809       | 0.337144444 | 1.263253734 |
| 0.043133333  | 0.336777778 | 1.262932714 |
| 0.1019       | 0.3367      | 1.262864629 |
| 0.2078       | 0.336511111 | 1.262699296 |
| 0.149        | 0.336144444 | 1.262378417 |
| 0.335666667  | 0.336111111 | 1.26234925  |
| 0.161966667  | 0.335944444 | 1.262203426 |
| 0.196866667  | 0.335422222 | 1.26174662  |
| 0.335933333  | 0.335088889 | 1.261455129 |
| 0.218766667  | 0.334788889 | 1.261192844 |
| 0.1075       | 0.334744444 | 1.261153991 |
| 0.184066667  | 0.334388889 | 1.260843215 |
| 0.199133333  | 0.334033333 | 1.260532516 |
| 0.1885       | 0.334       | 1.260503392 |
| 0.234933333  | 0.333844444 | 1.260367488 |
| 0.089233333  | 0.333488889 | 1.260056906 |
| 0.0988       | 0.333377778 | 1.259959864 |
| 0.0016       | 0.332644444 | 1.259319579 |
| 0.043166667  | 0.3326      | 1.259280785 |
| 0.136466667  | 0.3325      | 1.259193501 |
| 0.452066667  | 0.332144444 | 1.258883208 |
| 0.2492       | 0.331666667 | 1.258466372 |
| 0.278833333  | 0.331377778 | 1.258214399 |
| 0.4052       | 0.331088889 | 1.257962476 |
| 0.1934       | 0.330988889 | 1.257875284 |
| 0.076133333  | 0.330688889 | 1.257613743 |
| -0.042833333 | 0.330666667 | 1.257594372 |
| 0.031233333  | 0.3306      | 1.25753626  |
| 0.3134       | 0.3306      | 1.25753626  |
| 0.220833333  | 0.3305      | 1.257449098 |
| 0.394833333  | 0.330355556 | 1.257323207 |
| -0.004866667 | 0.330088889 | 1.257090825 |
| 0.4012       | 0.329955556 | 1.256974651 |
| 0.064166667  | 0.329422222 | 1.25651006  |
| 0.27         | 0.3292      | 1.256316532 |
| 0.047366667  | 0.329166667 | 1.256287505 |
| 0.2501       | 0.328744444 | 1.255919891 |

|              |             |             |
|--------------|-------------|-------------|
| 0.0888       | 0.328644444 | 1.25583284  |
| 0.1787       | 0.328266667 | 1.255504036 |
| 0.198666667  | 0.327966667 | 1.255242989 |
| 0.260833333  | 0.327966667 | 1.255242989 |
| 0.0581       | 0.327711111 | 1.255020658 |
| 0.065433333  | 0.327688889 | 1.255001326 |
| 0.141866667  | 0.327622222 | 1.254943334 |
| 0.0741       | 0.327466667 | 1.25480803  |
| 0.0405       | 0.327322222 | 1.254682403 |
| 0.1678       | 0.327144444 | 1.254527803 |
| 0.034233333  | 0.327       | 1.254402205 |
| 0.194133333  | 0.3265      | 1.253967537 |
| 0.0322       | 0.326388889 | 1.253870965 |
| 0.100333333  | 0.326388889 | 1.253870965 |
| 0.085666667  | 0.326377778 | 1.253861308 |
| 0.1943       | 0.326155556 | 1.253668187 |
| 0.426233333  | 0.326033333 | 1.253561984 |
| 0.044366667  | 0.324933333 | 1.252606555 |
| -0.0429      | 0.324722222 | 1.252423273 |
| 0.1649       | 0.324677778 | 1.25238469  |
| 0.046866667  | 0.324666667 | 1.252375045 |
| 0.251266667  | 0.324411111 | 1.252153222 |
| 0.1192       | 0.324377778 | 1.252124291 |
| -0.0565      | 0.3241      | 1.25188323  |
| -0.094866667 | 0.323844444 | 1.251661494 |
| 0.1925       | 0.323255556 | 1.251150686 |
| 0.167333333  | 0.323033333 | 1.250957983 |
| 0.472433333  | 0.323       | 1.25092908  |
| 0.0619       | 0.322922222 | 1.250861643 |
| 0.274966667  | 0.3229      | 1.250842375 |
| 0.119866667  | 0.322722222 | 1.250688248 |
| 0.1359       | 0.322322222 | 1.250341532 |
| 0.088        | 0.322244444 | 1.250274126 |
| 0.092066667  | 0.321966667 | 1.25003342  |
| 0.075366667  | 0.321677778 | 1.249783136 |
| 0.052        | 0.321388889 | 1.249532901 |
| 0.271266667  | 0.321155556 | 1.249330825 |
| 0.040166667  | 0.320922222 | 1.249128781 |
| -0.084666667 | 0.320844444 | 1.249061441 |
| 0.206966667  | 0.3208      | 1.249022962 |
| 0.186633333  | 0.320633333 | 1.248878678 |
| -0.133633333 | 0.320411111 | 1.248686324 |
| 0.168566667  | 0.320344444 | 1.248628624 |
| 0.0275       | 0.3203      | 1.248590159 |
| 0.092966667  | 0.3202      | 1.248503616 |
| 0.1058       | 0.320166667 | 1.24847477  |
| 0.091966667  | 0.319988889 | 1.248320935 |



|              |             |             |
|--------------|-------------|-------------|
| 0.178966667  | 0.3193      | 1.247725002 |
| 0.310966667  | 0.319233333 | 1.247667346 |
| 0.108333333  | 0.318966667 | 1.24743675  |
| 0.295833333  | 0.318833333 | 1.247321467 |
| 0.080833333  | 0.3188      | 1.247292648 |
| 0.095166667  | 0.318722222 | 1.247225407 |
| 0.078333333  | 0.318333333 | 1.246889254 |
| 0.144533333  | 0.318155556 | 1.246735614 |
| 0.1377       | 0.318111111 | 1.246697207 |
| 0.1143       | 0.317944444 | 1.246553191 |
| 0.163166667  | 0.317877778 | 1.246495589 |
| 0.027366667  | 0.317844444 | 1.246466789 |
| 0.179866667  | 0.317511111 | 1.246178828 |
| 0.194233333  | 0.317222222 | 1.245929315 |
| 0.295266667  | 0.317133333 | 1.245852551 |
| 0.1215       | 0.316544444 | 1.245344115 |
| 0.1794       | 0.316366667 | 1.245190665 |
| 0.188466667  | 0.316222222 | 1.245066001 |
| -0.0813      | 0.316222222 | 1.245066001 |
| 0.186        | 0.316211111 | 1.245056412 |
| 0.0794       | 0.316044444 | 1.244912586 |
| 0.114366667  | 0.315666667 | 1.244586642 |
| 0.190066667  | 0.315544444 | 1.244481207 |
| 0.2645       | 0.315422222 | 1.244375782 |
| 0.0913       | 0.315244444 | 1.244222451 |
| 0.0376       | 0.315022222 | 1.244030815 |
| 0.021666667  | 0.315011111 | 1.244021234 |
| 0.050533333  | 0.314888889 | 1.243915848 |
| 0.0596       | 0.314688889 | 1.243743416 |
| 0.0949       | 0.3145      | 1.243580586 |
| 0.4779       | 0.314377778 | 1.243475237 |
| 0.0492       | 0.314366667 | 1.24346566  |
| 0.2293       | 0.3139      | 1.243063503 |
| 0.0766       | 0.313566667 | 1.242776328 |
| 0.251566667  | 0.313333333 | 1.242575344 |
| -0.004133333 | 0.313177778 | 1.242441374 |
| 0.178366667  | 0.3124      | 1.241771736 |
| -0.061733333 | 0.312255556 | 1.241647415 |
| 0.262866667  | 0.312077778 | 1.24149442  |
| 0.3526       | 0.311944444 | 1.241379687 |
| 0.0249       | 0.311822222 | 1.241274525 |
| 0.127233333  | 0.311822222 | 1.241274525 |
| 0.045        | 0.311588889 | 1.241073784 |
| -0.017566667 | 0.311122222 | 1.240672401 |
| 0.3193       | 0.311033333 | 1.240595961 |
| 0.0843       | 0.310922222 | 1.240500419 |
| 0.1751       | 0.310611111 | 1.240232939 |

|              |             |             |
|--------------|-------------|-------------|
| 0.098366667  | 0.310577778 | 1.240204284 |
| 0.220133333  | 0.310422222 | 1.240070569 |
| 0.161133333  | 0.310211111 | 1.239889121 |
| 0.132933333  | 0.3101      | 1.239793633 |
| 0.088333333  | 0.309844444 | 1.239574038 |
| 0.273066667  | 0.309588889 | 1.239354483 |
| 0.1747       | 0.309577778 | 1.239344938 |
| 0.305233333  | 0.309555556 | 1.239325848 |
| 0.029366667  | 0.309411111 | 1.239201771 |
| 0.039466667  | 0.309366667 | 1.239163596 |
| 0.3124       | 0.309222222 | 1.239039536 |
| 0.124966667  | 0.309122222 | 1.238953655 |
| 0.0818       | 0.308777778 | 1.238657889 |
| 0.217433333  | 0.308466667 | 1.238390807 |
| -0.015133333 | 0.308277778 | 1.238228678 |
| 0.194333333  | 0.308133333 | 1.238104711 |
| 0.2314       | 0.307677778 | 1.23771382  |
| -0.047933333 | 0.307311111 | 1.23739929  |
| 0.3984       | 0.307111111 | 1.237227762 |
| 0.0652       | 0.306955556 | 1.237094368 |
| 0.092466667  | 0.306944444 | 1.23708484  |
| 0.137033333  | 0.306822222 | 1.236980041 |
| 0.097366667  | 0.306655556 | 1.236837148 |
| 0.117166667  | 0.306533333 | 1.23673237  |
| 0.293233333  | 0.306233333 | 1.236475225 |
| 0.005366667  | 0.306033333 | 1.236303825 |
| 0.0569       | 0.305988889 | 1.23626574  |
| 0.138433333  | 0.3058      | 1.236103889 |
| 0.079266667  | 0.305777778 | 1.236084849 |
| 0.125766667  | 0.305655556 | 1.235980135 |
| 0.251733333  | 0.305277778 | 1.235656529 |
| 0.195933333  | 0.304911111 | 1.235342522 |
| 0.119533333  | 0.304733333 | 1.235190304 |
| 0.185133333  | 0.304533333 | 1.235019083 |
| 0.1529       | 0.304511111 | 1.235000059 |
| 0.255566667  | 0.304177778 | 1.234714747 |
| 0.185433333  | 0.304077778 | 1.234629166 |
| 0.082466667  | 0.304066667 | 1.234619657 |
| 0.640366667  | 0.303855556 | 1.234439007 |
| 0.2663       | 0.303655556 | 1.234267889 |
| 0.0681       | 0.303655556 | 1.234267889 |
| 0.043733333  | 0.303377778 | 1.234030265 |
| -0.002266667 | 0.303       | 1.23370717  |
| 0.204        | 0.302866667 | 1.233593156 |
| 0.067166667  | 0.302855556 | 1.233583656 |
| 0.125566667  | 0.302622222 | 1.233384159 |
| 0.157333333  | 0.301766667 | 1.232652947 |

|              |             |             |
|--------------|-------------|-------------|
| 0.313766667  | 0.301611111 | 1.232520046 |
| 0.602866667  | 0.301444444 | 1.232377668 |
| -0.014366667 | 0.301355556 | 1.23230174  |
| 0.268466667  | 0.301255556 | 1.232216326 |
| 0.097866667  | 0.301122222 | 1.23210245  |
| 0.501266667  | 0.301022222 | 1.23201705  |
| 0.058833333  | 0.300511111 | 1.231580655 |
| 0.1423       | 0.300022222 | 1.231163377 |
| 0.215333333  | 0.299888889 | 1.231049599 |
| 0.143366667  | 0.299844444 | 1.231011675 |
| 0.5413       | 0.299666667 | 1.230859991 |
| -0.012233333 | 0.299488889 | 1.230708327 |
| -0.124133333 | 0.2994      | 1.230632501 |
| 0.455066667  | 0.299377778 | 1.230613546 |
| 0.089333333  | 0.299344444 | 1.230585113 |
| -0.073466667 | 0.299111111 | 1.230386101 |
| 0.025933333  | 0.299044444 | 1.230329246 |
| 0.4152       | 0.298922222 | 1.23022502  |
| 0.144233333  | 0.298855556 | 1.230168173 |
| 0.1892       | 0.298588889 | 1.22994081  |
| 0.079466667  | 0.297977778 | 1.22941993  |
| 0.025666667  | 0.297933333 | 1.229382056 |
| 0.090066667  | 0.297733333 | 1.22921164  |
| 0.068566667  | 0.297488889 | 1.229003385 |
| 0.036866667  | 0.2973      | 1.228842484 |
| 0.126166667  | 0.297266667 | 1.228814093 |
| 0.290566667  | 0.297188889 | 1.228747847 |
| 0.424033333  | 0.2967      | 1.22833153  |
| 0.155933333  | 0.296555556 | 1.228208554 |
| 0.320933333  | 0.296277778 | 1.227972096 |
| 0.078133333  | 0.295744444 | 1.227518225 |
| 0.125133333  | 0.295533333 | 1.227338614 |
| 0.137933333  | 0.295266667 | 1.227111775 |
| 0.098833333  | 0.294988889 | 1.226875528 |
| 0.053333333  | 0.293844444 | 1.225902673 |
| 0.037466667  | 0.293777778 | 1.225846025 |
| -0.1502      | 0.293644444 | 1.225732738 |
| 0.041133333  | 0.293133333 | 1.225298568 |
| 0.186433333  | 0.293077778 | 1.225251385 |
| 0.2498       | 0.293011111 | 1.225194768 |
| -0.212966667 | 0.292822222 | 1.225034366 |
| 0.034733333  | 0.292744444 | 1.224968325 |
| 0.159133333  | 0.292666667 | 1.224902287 |
| -0.116133333 | 0.292622222 | 1.224864552 |
| -0.094233333 | 0.292611111 | 1.224855119 |
| 0.366933333  | 0.2926      | 1.224845685 |
| -0.1387      | 0.292533333 | 1.224789087 |

|              |             |             |
|--------------|-------------|-------------|
| -0.055166667 | 0.292344444 | 1.224628738 |
| 0.400466667  | 0.291977778 | 1.224317534 |
| 0.264633333  | 0.2917      | 1.224081825 |
| 0.027366667  | 0.291488889 | 1.223902717 |
| 0.2358       | 0.291222222 | 1.223676513 |
| -0.077066667 | 0.291211111 | 1.223667089 |
| 0.196466667  | 0.2909      | 1.223403238 |
| 0.299566667  | 0.290811111 | 1.223327863 |
| -0.104433333 | 0.290766667 | 1.223290177 |
| 0.360866667  | 0.290711111 | 1.223243071 |
| 0.201        | 0.290211111 | 1.222819201 |
| 0.196166667  | 0.290122222 | 1.222743862 |
| 0.013        | 0.290077778 | 1.222706194 |
| 0.4834       | 0.289611111 | 1.222310751 |
| 0.6317       | 0.289544444 | 1.222254269 |
| 0.0129       | 0.289377778 | 1.222113077 |
| 0.1977       | 0.289344444 | 1.22208484  |
| 0.164633333  | 0.288944444 | 1.221746054 |
| 0.185766667  | 0.288855556 | 1.22167078  |
| -0.0637      | 0.288788889 | 1.221614328 |
| 0.142166667  | 0.288566667 | 1.221426174 |
| 0.044366667  | 0.288533333 | 1.221397954 |
| 0.096266667  | 0.288377778 | 1.221266266 |
| 0.186633333  | 0.288177778 | 1.221096974 |
| 0.271433333  | 0.287955556 | 1.2209089   |
| 0.0834       | 0.287833333 | 1.220805472 |
| 0.188933333  | 0.2876      | 1.220608041 |
| -0.131566667 | 0.2876      | 1.220608041 |
| -0.023033333 | 0.287466667 | 1.220495238 |
| 0.123466667  | 0.287255556 | 1.220316655 |
| 0.262733333  | 0.287255556 | 1.220316655 |
| 0.0723       | 0.286844444 | 1.219968963 |
| 0.202166667  | 0.286444444 | 1.219630762 |
| 0.1147       | 0.286377778 | 1.219574405 |
| 0.127933333  | 0.286211111 | 1.219433522 |
| 0.119566667  | 0.2858      | 1.219086081 |
| 0.3576       | 0.285577778 | 1.218898316 |
| 0.267466667  | 0.285566667 | 1.218888929 |
| 0.068433333  | 0.285422222 | 1.218766898 |
| 0.109133333  | 0.285288889 | 1.218654266 |
| 0.174833333  | 0.285233333 | 1.218607338 |
| 0.102966667  | 0.285177778 | 1.218560413 |
| 0.2838       | 0.285177778 | 1.218560413 |
| 0.102966667  | 0.285166667 | 1.218551028 |
| 0.1674       | 0.284944444 | 1.218363346 |
| 0.1124       | 0.283822222 | 1.217415992 |
| 0.011966667  | 0.283533333 | 1.217172238 |

|              |             |             |
|--------------|-------------|-------------|
| -0.054533333 | 0.283455556 | 1.21710662  |
| 0.021933333  | 0.283355556 | 1.21702226  |
| 0.2375       | 0.283311111 | 1.216984768 |
| 0.0073       | 0.2832      | 1.216891044 |
| 0.2578       | 0.283144444 | 1.216844185 |
| 0.1448       | 0.283055556 | 1.216769213 |
| 0.2033       | 0.282955556 | 1.216684876 |
| -0.215966667 | 0.282722222 | 1.216488112 |
| 0.165266667  | 0.282522222 | 1.216319483 |
| 0.111166667  | 0.282266667 | 1.216104046 |
| 0.128766667  | 0.282222222 | 1.216066583 |
| 0.340266667  | 0.282111111 | 1.215972929 |
| 0.129966667  | 0.282088889 | 1.2159542   |
| 0.1753       | 0.282044444 | 1.215916741 |
| 0.027166667  | 0.281822222 | 1.215729464 |
| 0.226033333  | 0.281722222 | 1.215645199 |
| 0.0588       | 0.281666667 | 1.215598388 |
| 0.057366667  | 0.281611111 | 1.215551578 |
| 0.196166667  | 0.281344444 | 1.215326917 |
| 0.0563       | 0.281177778 | 1.215186525 |
| 0.1578       | 0.280966667 | 1.215008719 |
| 0.178933333  | 0.280811111 | 1.21487772  |
| 0.1251       | 0.280788889 | 1.214859007 |
| 0.005866667  | 0.280588889 | 1.214690604 |
| 0.175266667  | 0.280566667 | 1.214671894 |
| 0.148566667  | 0.2801      | 1.214279049 |
| -0.041766667 | 0.279855556 | 1.214073324 |
| 0.258066667  | 0.279744444 | 1.213979824 |
| 0.203466667  | 0.279677778 | 1.213923727 |
| 0.040766667  | 0.279655556 | 1.213905029 |
| 0.317766667  | 0.279611111 | 1.213867633 |
| 0.117866667  | 0.2796      | 1.213858285 |
| 0.170666667  | 0.2796      | 1.213858285 |
| -0.0214      | 0.279411111 | 1.213699367 |
| 0.0973       | 0.279222222 | 1.213540471 |
| 0.0662       | 0.279188889 | 1.213512432 |
| 0.135366667  | 0.278777778 | 1.213166679 |
| 0.001933333  | 0.278622222 | 1.213035878 |
| 0.112066667  | 0.278333333 | 1.212793001 |
| -0.118733333 | 0.277922222 | 1.212447453 |
| 0.184033333  | 0.277522222 | 1.212111337 |
| 0.1268       | 0.277055556 | 1.211719321 |
| 0.1853       | 0.276677778 | 1.211402067 |
| 0.071266667  | 0.2766      | 1.21133676  |
| 0.4749       | 0.276544444 | 1.211290115 |
| 0.103933333  | 0.276311111 | 1.211094223 |
| 0.435866667  | 0.2761      | 1.210917015 |

|              |             |             |
|--------------|-------------|-------------|
| 0.078833333  | 0.276055556 | 1.210879712 |
| 0.186066667  | 0.275944444 | 1.210786458 |
| -0.0996      | 0.275933333 | 1.210777133 |
| 0.038333333  | 0.275866667 | 1.210721184 |
| 0.042933333  | 0.275811111 | 1.210674563 |
| 0.2919       | 0.275811111 | 1.210674563 |
| -0.066133333 | 0.275788889 | 1.210655914 |
| 0.201833333  | 0.275766667 | 1.210637266 |
| 0.0355       | 0.275577778 | 1.210478771 |
| 0.282766667  | 0.275466667 | 1.210385548 |
| 0.300933333  | 0.275433333 | 1.210357582 |
| 0.0199       | 0.275422222 | 1.210348261 |
| 0.1012       | 0.274811111 | 1.209835678 |
| 0.174033333  | 0.274111111 | 1.209248804 |
| 0.124166667  | 0.274077778 | 1.209220865 |
| 0.185733333  | 0.274011111 | 1.209164988 |
| 0.228066667  | 0.273744444 | 1.208941508 |
| 0.3029       | 0.2736      | 1.208820473 |
| -0.327333333 | 0.273555556 | 1.208783234 |
| 0.1725       | 0.273444444 | 1.208690142 |
| 0.015133333  | 0.273355556 | 1.208615673 |
| 0.084533333  | 0.273322222 | 1.208587748 |
| 0.141566667  | 0.273255556 | 1.208531901 |
| 0.1856       | 0.273188889 | 1.208476056 |
| 0.1098       | 0.273077778 | 1.208382987 |
| 0.233233333  | 0.272977778 | 1.208299231 |
| -0.049066667 | 0.272955556 | 1.20828062  |
| -0.045766667 | 0.272533333 | 1.207927054 |
| 0.059233333  | 0.2725      | 1.207899145 |
| 0.074933333  | 0.2723      | 1.207731706 |
| 0.376666667  | 0.272277778 | 1.207713103 |
| 0.219366667  | 0.272233333 | 1.207675898 |
| 0.279233333  | 0.272055556 | 1.20752709  |
| 0.0124       | 0.2717      | 1.207229529 |
| 0.369066667  | 0.271611111 | 1.20715515  |
| 0.212833333  | 0.271522222 | 1.207080776 |
| 0.154266667  | 0.271511111 | 1.20707148  |
| 0.300666667  | 0.271455556 | 1.207024998 |
| 0.1998       | 0.271333333 | 1.206922746 |
| 0.103866667  | 0.271044444 | 1.206681093 |
| 0.200966667  | 0.270477778 | 1.206207222 |
| 0.069066667  | 0.270411111 | 1.206151484 |
| 0.264566667  | 0.270333333 | 1.206086461 |
| 0.037966667  | 0.270122222 | 1.205909986 |
| 0.137066667  | 0.269933333 | 1.205752109 |
| 0.219066667  | 0.269866667 | 1.205696393 |
| 0.135533333  | 0.269855556 | 1.205687107 |

|              |             |             |
|--------------|-------------|-------------|
| 0.083066667  | 0.269844444 | 1.205677821 |
| 0.220533333  | 0.269833333 | 1.205668535 |
| 0.3853       | 0.269811111 | 1.205649964 |
| 0.260833333  | 0.269766667 | 1.205612823 |
| -0.069866667 | 0.269677778 | 1.205538544 |
| 0.164666667  | 0.269522222 | 1.205408566 |
| -0.0631      | 0.269511111 | 1.205399282 |
| 0.117633333  | 0.269344444 | 1.205260037 |
| 0.111466667  | 0.269044444 | 1.205009437 |
| 0.063366667  | 0.268822222 | 1.20482384  |
| 0.209166667  | 0.268466667 | 1.204526945 |
| -0.040166667 | 0.268355556 | 1.20443418  |
| 0.4202       | 0.268277778 | 1.204369249 |
| -0.0381      | 0.268166667 | 1.204276497 |
| 0.157466667  | 0.268144444 | 1.204257947 |
| 0.1201       | 0.2679      | 1.20405392  |
| 0.056633333  | 0.267811111 | 1.203979736 |
| 0.169533333  | 0.267588889 | 1.203794299 |
| 0.285733333  | 0.267533333 | 1.203747943 |
| 0.1002       | 0.267511111 | 1.203729402 |
| 0.339366667  | 0.267322222 | 1.203571811 |
| 0.250033333  | 0.267122222 | 1.203404972 |
| 0.067933333  | 0.267044444 | 1.203340096 |
| 0.007166667  | 0.266966667 | 1.203275224 |
| 0.0671       | 0.266933333 | 1.203247423 |
| 0.175566667  | 0.266711111 | 1.203062098 |
| 0.135        | 0.266633333 | 1.202997241 |
| 0.110166667  | 0.266622222 | 1.202987976 |
| 0.262966667  | 0.2665      | 1.202886065 |
| 0.168033333  | 0.2665      | 1.202886065 |
| 0.092266667  | 0.266455556 | 1.202849009 |
| 0.213766667  | 0.266433333 | 1.202830481 |
| 0.149166667  | 0.2664      | 1.20280269  |
| 0.0216       | 0.266111111 | 1.202561862 |
| 0.211733333  | 0.266066667 | 1.202524816 |
| 0.075166667  | 0.266       | 1.202469249 |
| -0.0066      | 0.265944444 | 1.202422945 |
| -0.014933333 | 0.265766667 | 1.202274784 |
| 0.175766667  | 0.265533333 | 1.202080351 |
| 0.0893       | 0.2655      | 1.202052577 |
| 0.0066       | 0.265344444 | 1.201922975 |
| -0.095833333 | 0.265288889 | 1.201876692 |
| 0.047566667  | 0.265155556 | 1.20176562  |
| 0.0323       | 0.265133333 | 1.201747109 |
| 0.214733333  | 0.265066667 | 1.201691578 |
| 0.031333333  | 0.265022222 | 1.201654559 |
| 0.269133333  | 0.264955556 | 1.201599032 |

|              |             |             |
|--------------|-------------|-------------|
| -0.185333333 | 0.264822222 | 1.201487986 |
| 0.223733333  | 0.264444444 | 1.20117341  |
| 0.091066667  | 0.264433333 | 1.20116416  |
| -0.0098      | 0.263988889 | 1.200794179 |
| 0.2114       | 0.263955556 | 1.200766435 |
| 0.210866667  | 0.263577778 | 1.200452049 |
| 0.1244       | 0.263388889 | 1.200294887 |
| -0.101066667 | 0.263311111 | 1.200230179 |
| 0.2348       | 0.262944444 | 1.199925175 |
| 0.1837       | 0.262833333 | 1.199832764 |
| -0.1082      | 0.2628      | 1.199805043 |
| 0.0595       | 0.262755556 | 1.199768081 |
| 0.088        | 0.262666667 | 1.199694162 |
| 0.0551       | 0.262666667 | 1.199694162 |
| 0.015733333  | 0.262555556 | 1.19960177  |
| 0.136266667  | 0.262444444 | 1.199509384 |
| 0.107333333  | 0.262311111 | 1.199398531 |
| 0.032        | 0.262166667 | 1.199278452 |
| 0.185466667  | 0.262155556 | 1.199269215 |
| 0.0889       | 0.262122222 | 1.199241507 |
| 0.077533333  | 0.261933333 | 1.199084503 |
| -0.109766667 | 0.261844444 | 1.199010626 |
| 0.1959       | 0.2618      | 1.198973689 |
| -0.0862      | 0.261722222 | 1.198909053 |
| 0.048466667  | 0.261588889 | 1.198798255 |
| 0.164        | 0.261522222 | 1.19874286  |
| 0.074933333  | 0.2614      | 1.198641309 |
| 0.068166667  | 0.261388889 | 1.198632078 |
| 0.113966667  | 0.261011111 | 1.19831825  |
| 0.120366667  | 0.260955556 | 1.198272106 |
| 0.224566667  | 0.260944444 | 1.198262878 |
| 0.084033333  | 0.260811111 | 1.19815214  |
| 0.178066667  | 0.260677778 | 1.198041412 |
| -0.1556      | 0.260355556 | 1.197773862 |
| 0.1278       | 0.2603      | 1.197727739 |
| 0.369566667  | 0.2603      | 1.197727739 |
| 0.0415       | 0.2597      | 1.197229722 |
| 0.276433333  | 0.259644444 | 1.19718362  |
| 0.256133333  | 0.259555556 | 1.19710986  |
| 0.142266667  | 0.259544444 | 1.19710064  |
| 0.148433333  | 0.259244444 | 1.196851736 |
| 0.164633333  | 0.259233333 | 1.196842518 |
| 0.267733333  | 0.259055556 | 1.196695045 |
| 0.206833333  | 0.259       | 1.196648963 |
| 0.317966667  | 0.258922222 | 1.196584452 |
| 0.2095       | 0.258888889 | 1.196556805 |
| 0.3252       | 0.258866667 | 1.196538374 |



|              |             |             |
|--------------|-------------|-------------|
| 0.235266667  | 0.258833333 | 1.196510729 |
| 0.1088       | 0.258833333 | 1.196510729 |
| 0.030566667  | 0.258777778 | 1.196464654 |
| 0.2461       | 0.258722222 | 1.196418582 |
| 0.210666667  | 0.258722222 | 1.196418582 |
| 0.1699       | 0.258688889 | 1.196390939 |
| -0.011733333 | 0.258255556 | 1.19603164  |
| -0.013033333 | 0.258211111 | 1.195994795 |
| -0.009466667 | 0.258077778 | 1.195884267 |
| 0.057166667  | 0.258       | 1.195819797 |
| 0.067566667  | 0.2579      | 1.195736912 |
| 0.061333333  | 0.257866667 | 1.195709285 |
| 0.121666667  | 0.257833333 | 1.195681658 |
| -0.011866667 | 0.257644444 | 1.195525121 |
| 0.270566667  | 0.257633333 | 1.195515913 |
| 0.0643       | 0.257411111 | 1.195331779 |
| 0.1727       | 0.257344444 | 1.195276544 |
| 0.063966667  | 0.257222222 | 1.195175287 |
| 0.1898       | 0.256955556 | 1.194954392 |
| 0.014566667  | 0.256733333 | 1.194770344 |
| 0.073366667  | 0.256611111 | 1.19466913  |
| 0.125733333  | 0.2564      | 1.194494325 |
| 0.1116       | 0.256311111 | 1.194420731 |
| 0.074966667  | 0.256222222 | 1.194347141 |
| 0.045933333  | 0.256122222 | 1.194264358 |
| 0.2836       | 0.255166667 | 1.193473611 |
| -0.0691      | 0.255144444 | 1.193455227 |
| 0.0216       | 0.254933333 | 1.1932806   |
| 0.269633333  | 0.254922222 | 1.19327141  |
| 0.073166667  | 0.254822222 | 1.193188702 |
| 0.022933333  | 0.254744444 | 1.193124377 |
| -0.2226      | 0.254255556 | 1.192720129 |
| 0.242533333  | 0.253733333 | 1.19228847  |
| 0.188066667  | 0.253477778 | 1.19207729  |
| -0.091566667 | 0.253277778 | 1.191912044 |
| 0.353733333  | 0.253211111 | 1.191856968 |
| 0.0662       | 0.253166667 | 1.191820251 |
| 0.031        | 0.253133333 | 1.191792715 |
| 0.101833333  | 0.252866667 | 1.191572445 |
| 0.097333333  | 0.252844444 | 1.191554091 |
| -0.073533333 | 0.252844444 | 1.191554091 |
| 0.158133333  | 0.252833333 | 1.191544914 |
| 0.101933333  | 0.252822222 | 1.191535737 |
| 0.2839       | 0.2527      | 1.191434797 |
| 0.023766667  | 0.252577778 | 1.191333865 |
| 0.202933333  | 0.252566667 | 1.19132469  |
| -0.003566667 | 0.252422222 | 1.191205419 |

|              |             |             |
|--------------|-------------|-------------|
| 0.063        | 0.252255556 | 1.191067814 |
| 0.265233333  | 0.252222222 | 1.191040294 |
| 9.00E-04     | 0.252077778 | 1.190921052 |
| -0.0776      | 0.251955556 | 1.190820164 |
| 0.113133333  | 0.251733333 | 1.190636753 |
| 0.177166667  | 0.251477778 | 1.190425865 |
| 0.160033333  | 0.251377778 | 1.190343354 |
| -0.0873      | 0.251077778 | 1.190095854 |
| -0.047066667 | 0.251044444 | 1.190068358 |
| 0.278033333  | 0.250866667 | 1.189921719 |
| 0.1268       | 0.250788889 | 1.18985757  |
| -0.181033333 | 0.2507      | 1.189784262 |
| 0.091866667  | 0.250555556 | 1.189665145 |
| -0.028933333 | 0.250133333 | 1.189317026 |
| 0.2376       | 0.249811111 | 1.189051425 |
| 0.204566667  | 0.2498      | 1.189042267 |
| -0.043       | 0.249744444 | 1.18899648  |
| 0.059833333  | 0.2497      | 1.188959852 |
| 0.059566667  | 0.2496      | 1.188877442 |
| 0.1461       | 0.249255556 | 1.188593631 |
| 0.218933333  | 0.248955556 | 1.188346496 |
| 0.209333333  | 0.248788889 | 1.18820922  |
| 0.0463       | 0.248711111 | 1.188145164 |
| 0.466433333  | 0.2486      | 1.188053661 |
| 0.124966667  | 0.2485      | 1.187971314 |
| 0.2823       | 0.2485      | 1.187971314 |
| 0.232766667  | 0.248488889 | 1.187962165 |
| 0.331166667  | 0.247955556 | 1.187523082 |
| 0.003333333  | 0.247911111 | 1.187486499 |
| 0.238966667  | 0.2479      | 1.187477354 |
| -0.018333333 | 0.247766667 | 1.187367612 |
| -0.0867      | 0.247544444 | 1.187184733 |
| 0.063733333  | 0.2475      | 1.187148161 |
| 0.024766667  | 0.247       | 1.186736798 |
| 0.165466667  | 0.246944444 | 1.186691099 |
| 0.476866667  | 0.246911111 | 1.186663681 |
| 0.166133333  | 0.2468      | 1.186572292 |
| 0.034566667  | 0.246633333 | 1.186435222 |
| 0.0887       | 0.2466      | 1.18640781  |
| 0.060066667  | 0.246177778 | 1.186060644 |
| 0.145266667  | 0.245944444 | 1.185868833 |
| 0.200433333  | 0.245744444 | 1.185704448 |
| 0.000766667  | 0.245733333 | 1.185695316 |
| 0.007366667  | 0.245333333 | 1.185366617 |
| 0.1099       | 0.245211111 | 1.1852662   |
| 0.1118       | 0.245188889 | 1.185247943 |
| 0.316833333  | 0.245033333 | 1.185120153 |

|              |             |             |
|--------------|-------------|-------------|
| 0.213266667  | 0.244955556 | 1.185056263 |
| 0.102233333  | 0.244955556 | 1.185056263 |
| 0.126033333  | 0.244366667 | 1.184572637 |
| -0.0422      | 0.244177778 | 1.184417554 |
| 0.176266667  | 0.244133333 | 1.184381067 |
| 0.214133333  | 0.243733333 | 1.184052732 |
| 0.0728       | 0.243377778 | 1.183760956 |
| -0.009166667 | 0.243255556 | 1.183660674 |
| 0.2408       | 0.2432      | 1.183615094 |
| 0.065533333  | 0.243055556 | 1.183496595 |
| 0.4509       | 0.243033333 | 1.183478366 |
| 0.378733333  | 0.243022222 | 1.183469251 |
| 0.013333333  | 0.242933333 | 1.183396336 |
| 0.130233333  | 0.242933333 | 1.183396336 |
| 0.099766667  | 0.242855556 | 1.183332539 |
| 0.2667       | 0.242744444 | 1.183241407 |
| -0.0427      | 0.242688889 | 1.183195843 |
| 0.0668       | 0.242677778 | 1.183186731 |
| 0.216866667  | 0.242566667 | 1.183095609 |
| -0.032766667 | 0.242466667 | 1.183013606 |
| 0.147866667  | 0.242244444 | 1.182831397 |
| 0.2525       | 0.242177778 | 1.18277674  |
| -0.094633333 | 0.241966667 | 1.182603676 |
| 0.166833333  | 0.241955556 | 1.182594568 |
| -0.0552      | 0.241944444 | 1.18258546  |
| -0.055166667 | 0.241877778 | 1.182530814 |
| 0.063033333  | 0.2418      | 1.182467064 |
| 0.131666667  | 0.241755556 | 1.182430637 |
| 0.2487       | 0.241711111 | 1.182394211 |
| 0.106333333  | 0.2416      | 1.182303151 |
| 0.0193       | 0.241544444 | 1.182257623 |
| 0.187066667  | 0.2415      | 1.182221203 |
| 0.0265       | 0.241455556 | 1.182184783 |
| 0.280433333  | 0.241322222 | 1.182075531 |
| 0.002466667  | 0.241255556 | 1.182020909 |
| 0.120266667  | 0.2412      | 1.181975392 |
| 0.294166667  | 0.241133333 | 1.181920775 |
| 0.153366667  | 0.240988889 | 1.181802445 |
| 0.111833333  | 0.240633333 | 1.181511223 |
| 0.376766667  | 0.240566667 | 1.181456627 |
| 0.241733333  | 0.240322222 | 1.181256463 |
| 0.1367       | 0.240244444 | 1.181192781 |
| 0.119833333  | 0.240055556 | 1.18103814  |
| 0.143933333  | 0.239822222 | 1.180847141 |
| 0.2162       | 0.2396      | 1.180665266 |
| 0.1288       | 0.239533333 | 1.180610709 |
| -0.297133333 | 0.239377778 | 1.180483419 |

|              |             |             |
|--------------|-------------|-------------|
| 0.173366667  | 0.239322222 | 1.180437962 |
| 0.106766667  | 0.2392      | 1.180337962 |
| -0.0471      | 0.239022222 | 1.180192522 |
| 0.331266667  | 0.239011111 | 1.180183433 |
| 0.095766667  | 0.238933333 | 1.180119809 |
| 0.107        | 0.2389      | 1.180092543 |
| 0.135566667  | 0.238888889 | 1.180083454 |
| 0.304066667  | 0.238777778 | 1.179992572 |
| 0.118466667  | 0.238733333 | 1.179956221 |
| 0.049033333  | 0.2387      | 1.179928958 |
| -0.071166667 | 0.238677778 | 1.179910784 |
| -0.036666667 | 0.238566667 | 1.179819915 |
| -0.1384      | 0.238555556 | 1.179810828 |
| 0.194733333  | 0.238522222 | 1.179783569 |
| 0.055766667  | 0.238477778 | 1.179747225 |
| 0.044466667  | 0.238377778 | 1.179665454 |
| 0.0731       | 0.238366667 | 1.179656369 |
| -0.528866667 | 0.238255556 | 1.179565519 |
| 0.089866667  | 0.238066667 | 1.179411091 |
| 0.2037       | 0.237922222 | 1.179293013 |
| 0.171266667  | 0.2379      | 1.179274848 |
| 0.0687       | 0.237866667 | 1.179247602 |
| 0.029833333  | 0.237811111 | 1.179202192 |
| 0.056233333  | 0.237777778 | 1.179174947 |
| 0.07         | 0.237766667 | 1.179165865 |
| 0.245766667  | 0.237677778 | 1.179093215 |
| -0.0048      | 0.237644444 | 1.179065973 |
| 0.125233333  | 0.237555556 | 1.178993329 |
| 0.1054       | 0.237544444 | 1.178984249 |
| 0.217666667  | 0.2374      | 1.178866214 |
| 0.082866667  | 0.237211111 | 1.178711877 |
| 0.0874       | 0.2372      | 1.178702799 |
| -0.0422      | 0.237055556 | 1.178584792 |
| 0.048766667  | 0.236788889 | 1.178366963 |
| 0.1674       | 0.236766667 | 1.178348813 |
| 0.1952       | 0.236755556 | 1.178339738 |
| 0.1087       | 0.236755556 | 1.178339738 |
| -0.1165      | 0.2367      | 1.178294363 |
| 0.147333333  | 0.235977778 | 1.177704649 |
| 0.208066667  | 0.235922222 | 1.177659299 |
| 0.240166667  | 0.235766667 | 1.177532327 |
| -0.0011      | 0.235622222 | 1.177414437 |
| 0.091966667  | 0.235477778 | 1.177296558 |
| -0.001733333 | 0.235311111 | 1.17716056  |
| -0.0226      | 0.235311111 | 1.17716056  |
| -0.029533333 | 0.235277778 | 1.177133362 |
| 0.090833333  | 0.235255556 | 1.17711523  |

|              |             |             |
|--------------|-------------|-------------|
| -0.020466667 | 0.235122222 | 1.177006447 |
| 0.1027       | 0.234933333 | 1.176852354 |
| 0.2844       | 0.2348      | 1.176743595 |
| 0.060933333  | 0.234722222 | 1.176680156 |
| 0.053566667  | 0.2346      | 1.176580475 |
| 0.257        | 0.234511111 | 1.176507984 |
| 0.1125       | 0.234477778 | 1.176480801 |
| 0.205066667  | 0.234355556 | 1.176381136 |
| 0.2168       | 0.234344444 | 1.176372076 |
| -0.125633333 | 0.234133333 | 1.176199949 |
| 0.1084       | 0.234133333 | 1.176199949 |
| 0.1233       | 0.234122222 | 1.176190891 |
| 0.043333333  | 0.234055556 | 1.17613654  |
| 0.081066667  | 0.234022222 | 1.176109366 |
| 0.201966667  | 0.233766667 | 1.175901051 |
| 0.170833333  | 0.233644444 | 1.175801436 |
| 0.055433333  | 0.2336      | 1.175765214 |
| 0.0915       | 0.2336      | 1.175765214 |
| 0.3862       | 0.233455556 | 1.175647501 |
| 0.0068       | 0.232977778 | 1.175258225 |
| 0.2026       | 0.232922222 | 1.175212969 |
| 0.114366667  | 0.2329      | 1.175194867 |
| 0.211966667  | 0.232822222 | 1.175131513 |
| 0.077533333  | 0.232577778 | 1.17493242  |
| 0.3748       | 0.232555556 | 1.174914322 |
| 0.062033333  | 0.2325      | 1.174869079 |
| 0.211933333  | 0.232455556 | 1.174832886 |
| -0.025566667 | 0.232422222 | 1.174805742 |
| 0.132233333  | 0.232344444 | 1.174742408 |
| 0.1359       | 0.232255556 | 1.174670031 |
| 0.127066667  | 0.2322      | 1.174624798 |
| 0.1381       | 0.231966667 | 1.174434836 |
| 0.295866667  | 0.231911111 | 1.174389611 |
| 0.110066667  | 0.231677778 | 1.174199687 |
| 0.187533333  | 0.231677778 | 1.174199687 |
| 0.119366667  | 0.2315      | 1.174055004 |
| -0.0715      | 0.231477778 | 1.17403692  |
| 0.153233333  | 0.2312      | 1.173810892 |
| -0.127833333 | 0.231055556 | 1.173693374 |
| 0.125566667  | 0.231011111 | 1.173657217 |
| 0.1006       | 0.2307      | 1.17340415  |
| 0.042166667  | 0.230222222 | 1.173015618 |
| 0.115        | 0.230188889 | 1.172988516 |
| 0.229533333  | 0.230111111 | 1.17292528  |
| 0.069333333  | 0.230111111 | 1.17292528  |
| 0.1862       | 0.229611111 | 1.172518846 |
| 0.112933333  | 0.229577778 | 1.172491755 |

|              |             |             |
|--------------|-------------|-------------|
| -0.049233333 | 0.229533333 | 1.172455635 |
| 0.109733333  | 0.229466667 | 1.172401458 |
| 0.2366       | 0.229233333 | 1.172211855 |
| 0.066466667  | 0.229233333 | 1.172211855 |
| 0.257133333  | 0.229144444 | 1.172139634 |
| 0.068866667  | 0.229066667 | 1.172076444 |
| 0.148633333  | 0.228744444 | 1.171814693 |
| 0.108733333  | 0.228511111 | 1.171625185 |
| 0.0148       | 0.228366667 | 1.171507887 |
| 0.1495       | 0.228333333 | 1.171480819 |
| 0.017633333  | 0.228255556 | 1.171417665 |
| 0.0639       | 0.228       | 1.171210181 |
| -0.0226      | 0.227811111 | 1.171056847 |
| 0.051266667  | 0.227811111 | 1.171056847 |
| 0.279333333  | 0.2278      | 1.171047828 |
| -0.005866667 | 0.227644444 | 1.170921569 |
| 0.074766667  | 0.227411111 | 1.170732206 |
| 0.106933333  | 0.227411111 | 1.170732206 |
| 0.079266667  | 0.227322222 | 1.170660076 |
| 0.0258       | 0.227222222 | 1.170578935 |
| 0.3367       | 0.227155556 | 1.170524844 |
| 0.0969       | 0.227022222 | 1.17041667  |
| 0.297966667  | 0.226977778 | 1.170380614 |
| 0.0305       | 0.226855556 | 1.170281466 |
| 0.005        | 0.226844444 | 1.170272453 |
| 0.270766667  | 0.226833333 | 1.17026344  |
| 0.133266667  | 0.2267      | 1.170155289 |
| 0.109466667  | 0.226577778 | 1.17005616  |
| 0.0123       | 0.226522222 | 1.170011104 |
| 0.018133333  | 0.226466667 | 1.16996605  |
| 0.029766667  | 0.226411111 | 1.169920998 |
| 0.0775       | 0.2264      | 1.169911988 |
| 0.074866667  | 0.226388889 | 1.169902977 |
| 0.143266667  | 0.226377778 | 1.169893967 |
| 0.046233333  | 0.226377778 | 1.169893967 |
| 0.2129       | 0.2263      | 1.169830898 |
| 0.343933333  | 0.226088889 | 1.169659728 |
| 0.156366667  | 0.225622222 | 1.169281441 |
| 0.1352       | 0.225611111 | 1.169272436 |
| 0.0603       | 0.2256      | 1.16926343  |
| 0.071033333  | 0.225577778 | 1.16924542  |
| -0.0319      | 0.225322222 | 1.169038321 |
| 0.1948       | 0.225077778 | 1.168840261 |
| 0.257133333  | 0.224977778 | 1.168759246 |
| 0.086966667  | 0.224844444 | 1.168651234 |
| -0.065066667 | 0.224766667 | 1.168588232 |
| 0.025266667  | 0.224       | 1.167967395 |

|              |             |             |
|--------------|-------------|-------------|
| -0.043466667 | 0.223811111 | 1.167814485 |
| -0.074933333 | 0.223611111 | 1.167652603 |
| 0.2494       | 0.223588889 | 1.167634617 |
| 0.024333333  | 0.223477778 | 1.167544694 |
| 0.1402       | 0.223466667 | 1.167535702 |
| 0.189933333  | 0.223388889 | 1.16747276  |
| -0.063266667 | 0.223322222 | 1.167418813 |
| 0.281133333  | 0.223177778 | 1.167301935 |
| 0.300533333  | 0.223177778 | 1.167301935 |
| 0.2605       | 0.223166667 | 1.167292945 |
| 0.145533333  | 0.222877778 | 1.167059227 |
| -0.030266667 | 0.222811111 | 1.167005298 |
| 0.055666667  | 0.222755556 | 1.16696036  |
| 0.175166667  | 0.2227      | 1.166915423 |
| 0.090966667  | 0.2227      | 1.166915423 |
| 0.036966667  | 0.222477778 | 1.166735694 |
| 0.004233333  | 0.222077778 | 1.166412251 |
| 0.156566667  | 0.221966667 | 1.166322422 |
| 0.072966667  | 0.221633333 | 1.166052975 |
| 0.0564       | 0.221522222 | 1.165963173 |
| 0.198466667  | 0.221455556 | 1.165909296 |
| 0.013        | 0.221355556 | 1.165828484 |
| 0.1413       | 0.221155556 | 1.165666877 |
| 0.2114       | 0.221033333 | 1.165568128 |
| 0.1861       | 0.220522222 | 1.165155269 |
| -0.005233333 | 0.220488889 | 1.165128349 |
| 0.5572       | 0.220433333 | 1.165083483 |
| -0.0742      | 0.220388889 | 1.165047591 |
| 0.147866667  | 0.220377778 | 1.165038618 |
| -0.0258      | 0.220322222 | 1.164993756 |
| 0.1683       | 0.2203      | 1.164975811 |
| 0.2702       | 0.220255556 | 1.164939923 |
| 0.0725       | 0.220188889 | 1.164886092 |
| 0.0494       | 0.219988889 | 1.164724616 |
| 0.324233333  | 0.219955556 | 1.164697706 |
| 0.3233       | 0.219955556 | 1.164697706 |
| 0.0731       | 0.2199      | 1.164652856 |
| 0.078733333  | 0.219688889 | 1.164482444 |
| 0.0188       | 0.219588889 | 1.164401731 |
| 0.186633333  | 0.219533333 | 1.164356893 |
| 0.098966667  | 0.219488889 | 1.164321023 |
| 0.150733333  | 0.219422222 | 1.164267221 |
| 0.0445       | 0.219355556 | 1.164213422 |
| 0.035766667  | 0.2193      | 1.164168591 |
| 0.044766667  | 0.219255556 | 1.164132728 |
| 0.154833333  | 0.219233333 | 1.164114797 |
| 0.1082       | 0.219066667 | 1.16398032  |

|              |             |             |
|--------------|-------------|-------------|
| 0.094633333  | 0.219044444 | 1.163962392 |
| -0.153833333 | 0.218977778 | 1.163908606 |
| 0.1322       | 0.218955556 | 1.163890678 |
| -0.037766667 | 0.218955556 | 1.163890678 |
| 0.109566667  | 0.218777778 | 1.163747265 |
| 0.1254       | 0.218777778 | 1.163747265 |
| 0.1892       | 0.218577778 | 1.163585947 |
| -0.2793      | 0.218144444 | 1.1632365   |
| 0.006        | 0.217966667 | 1.163093168 |
| 0.253366667  | 0.217577778 | 1.16277969  |
| 0.23         | 0.217522222 | 1.162734914 |
| -0.0078      | 0.217477778 | 1.162699095 |
| -0.1643      | 0.217366667 | 1.162609552 |
| -0.008566667 | 0.217222222 | 1.162493156 |
| 0.0351       | 0.217011111 | 1.162323059 |
| 0.518433333  | 0.216966667 | 1.162287253 |
| 0.139133333  | 0.216811111 | 1.162161938 |
| 0.149133333  | 0.216788889 | 1.162144037 |
| 0.134866667  | 0.216722222 | 1.162090336 |
| 0.255033333  | 0.216677778 | 1.162054537 |
| -0.134566667 | 0.216577778 | 1.161973992 |
| 0.176633333  | 0.216388889 | 1.161821867 |
| 0.240033333  | 0.216322222 | 1.161768181 |
| 0.1216       | 0.215966667 | 1.161481896 |
| 0.1324       | 0.215866667 | 1.161401391 |
| 0.2378       | 0.215766667 | 1.161320891 |
| 0.0403       | 0.215611111 | 1.161195681 |
| 0.065466667  | 0.215511111 | 1.161115196 |
| 0.0955       | 0.215255556 | 1.160909537 |
| -0.106733333 | 0.215044444 | 1.160739672 |
| 0.070266667  | 0.214877778 | 1.160605586 |
| 0.076166667  | 0.214788889 | 1.16053408  |
| 0.0135       | 0.214744444 | 1.160498328 |
| 0.0925       | 0.214688889 | 1.16045364  |
| 0.174233333  | 0.214644444 | 1.160417891 |
| 0.0857       | 0.214233333 | 1.160087265 |
| 0.006566667  | 0.214122222 | 1.159997923 |
| 0.190266667  | 0.213988889 | 1.159890721 |
| 0.0788       | 0.213988889 | 1.159890721 |
| 0.0785       | 0.213955556 | 1.159863923 |
| 0.199733333  | 0.2137      | 1.159658485 |
| -0.172566667 | 0.213522222 | 1.159515594 |
| 0.147566667  | 0.213511111 | 1.159506664 |
| 0.109466667  | 0.213455556 | 1.159462014 |
| 0.423733333  | 0.213455556 | 1.159462014 |
| 0.328033333  | 0.2134      | 1.159417366 |
| 0.2421       | 0.213377778 | 1.159399507 |



|              |             |             |
|--------------|-------------|-------------|
| 0.059933333  | 0.213311111 | 1.159345933 |
| 0.150533333  | 0.213277778 | 1.159319147 |
| -0.058133333 | 0.213188889 | 1.15924772  |
| 0.0731       | 0.212577778 | 1.158756778 |
| 0.061033333  | 0.212566667 | 1.158747854 |
| 0.192466667  | 0.212533333 | 1.158721081 |
| -0.036933333 | 0.2125      | 1.158694309 |
| 0.149066667  | 0.212444444 | 1.158649691 |
| 0.180133333  | 0.212366667 | 1.158587228 |
| -0.033433333 | 0.212333333 | 1.15856046  |
| 0.059966667  | 0.212266667 | 1.158506924 |
| 0.197633333  | 0.212055556 | 1.158337411 |
| -0.044333333 | 0.211988889 | 1.158283885 |
| 0.155066667  | 0.211866667 | 1.158185762 |
| 0.066133333  | 0.211822222 | 1.158150083 |
| 0.013266667  | 0.211777778 | 1.158114405 |
| 0.0297       | 0.211755556 | 1.158096566 |
| -0.100266667 | 0.211722222 | 1.158069809 |
| 0.101866667  | 0.211577778 | 1.157953867 |
| 0.2077       | 0.211577778 | 1.157953867 |
| 0.282966667  | 0.211566667 | 1.157944949 |
| -0.036833333 | 0.211555556 | 1.157936031 |
| 0.094866667  | 0.211477778 | 1.157873607 |
| 0.075        | 0.211444444 | 1.157846855 |
| 0.018133333  | 0.211411111 | 1.157820103 |
| 0.016566667  | 0.211255556 | 1.15769527  |
| 0.2286       | 0.211144444 | 1.157606112 |
| 0.0005       | 0.2111      | 1.157570451 |
| -0.1412      | 0.210988889 | 1.157481302 |
| 0.030266667  | 0.210844444 | 1.15736542  |
| 0.132866667  | 0.210811111 | 1.157338679 |
| 0.265933333  | 0.210755556 | 1.157294113 |
| 0.048366667  | 0.210733333 | 1.157276287 |
| 0.140166667  | 0.210666667 | 1.157222811 |
| -0.096333333 | 0.210633333 | 1.157196074 |
| 0.047633333  | 0.210433333 | 1.157035663 |
| 0.052133333  | 0.210333333 | 1.156955466 |
| 0.1227       | 0.210288889 | 1.156919825 |
| -0.0217      | 0.210166667 | 1.156821817 |
| -0.129833333 | 0.210144444 | 1.156803999 |
| 0.089866667  | 0.209922222 | 1.156625827 |
| -0.001733333 | 0.209833333 | 1.156554566 |
| 0.129866667  | 0.209788889 | 1.156518937 |
| 0.140533333  | 0.209777778 | 1.15651003  |
| 0.187133333  | 0.209766667 | 1.156501123 |
| 0.253566667  | 0.209722222 | 1.156465496 |
| -0.0341      | 0.209488889 | 1.156278471 |

|              |             |             |
|--------------|-------------|-------------|
| -0.676733333 | 0.209477778 | 1.156269565 |
| 0.125866667  | 0.209455556 | 1.156251755 |
| 0.7683       | 0.209366667 | 1.156180517 |
| 0.2132       | 0.209077778 | 1.155949024 |
| 0.102433333  | 0.208988889 | 1.155877804 |
| 0.3793       | 0.208988889 | 1.155877804 |
| 0.104566667  | 0.208955556 | 1.155851098 |
| 0.0053       | 0.208844444 | 1.155762082 |
| -0.144566667 | 0.208755556 | 1.155690874 |
| 0.043733333  | 0.208733333 | 1.155673073 |
| 0.133433333  | 0.208622222 | 1.155584071 |
| 0.060833333  | 0.208522222 | 1.155503975 |
| 0.1975       | 0.208444444 | 1.155441681 |
| -0.0203      | 0.208344444 | 1.155361595 |
| 0.2558       | 0.208288889 | 1.155317105 |
| 0.1095       | 0.208066667 | 1.155139162 |
| 0.172        | 0.208044444 | 1.155121369 |
| -0.146766667 | 0.207822222 | 1.154943457 |
| -0.014366667 | 0.2077      | 1.154845616 |
| 0.249033333  | 0.207455556 | 1.15464996  |
| 0.114466667  | 0.207388889 | 1.154596605 |
| 0.152633333  | 0.207333333 | 1.154552145 |
| 0.091766667  | 0.207288889 | 1.154516578 |
| -0.119533333 | 0.207233333 | 1.15447212  |
| 0.002166667  | 0.207222222 | 1.154463229 |
| 0.200866667  | 0.206966667 | 1.154258748 |
| -0.035233333 | 0.206911111 | 1.154214301 |
| 0.091166667  | 0.206877778 | 1.154187633 |
| 0.1254       | 0.2067      | 1.154045416 |
| 0.007366667  | 0.206677778 | 1.15402764  |
| 0.127066667  | 0.206533333 | 1.153912103 |
| 0.2369       | 0.206488889 | 1.153876555 |
| 0.0966       | 0.206444444 | 1.153841009 |
| 0.281266667  | 0.206444444 | 1.153841009 |
| 0.0496       | 0.206422222 | 1.153823236 |
| -0.0332      | 0.206344444 | 1.153761033 |
| 0.209266667  | 0.206277778 | 1.15370772  |
| 0.2119       | 0.206011111 | 1.153494489 |
| 0.3692       | 0.205877778 | 1.153387888 |
| 0.091166667  | 0.205877778 | 1.153387888 |
| -0.0016      | 0.205855556 | 1.153370122 |
| 0.360533333  | 0.205822222 | 1.153343474 |
| -0.0772      | 0.205644444 | 1.153201361 |
| 0.125233333  | 0.205633333 | 1.153192479 |
| 0.1312       | 0.205544444 | 1.15312143  |
| 0.072933333  | 0.205344444 | 1.152961584 |
| -0.186033333 | 0.205144444 | 1.152801761 |

|              |             |             |
|--------------|-------------|-------------|
| 0.009933333  | 0.204966667 | 1.152659714 |
| 0.2055       | 0.204966667 | 1.152659714 |
| 0.078766667  | 0.204877778 | 1.152588698 |
| 0.219233333  | 0.204822222 | 1.152544314 |
| -0.014933333 | 0.2048      | 1.152526562 |
| 0.064466667  | 0.204477778 | 1.152269177 |
| 0.066866667  | 0.204466667 | 1.152260302 |
| 0.2274       | 0.204422222 | 1.152224806 |
| 0.107366667  | 0.204366667 | 1.152180436 |
| -0.062466667 | 0.204344444 | 1.152162689 |
| 0.1193       | 0.204333333 | 1.152153816 |
| 0.123766667  | 0.204311111 | 1.152136069 |
| 0.061533333  | 0.204044444 | 1.151923129 |
| 0.141466667  | 0.203977778 | 1.1518699   |
| 0.026233333  | 0.203755556 | 1.151692488 |
| 0.286633333  | 0.203488889 | 1.151479629 |
| 0.074733333  | 0.203211111 | 1.151257944 |
| 0.190833333  | 0.203033333 | 1.151116087 |
| 0.045633333  | 0.202733333 | 1.150876744 |
| -0.0411      | 0.202711111 | 1.150859017 |
| 0.136966667  | 0.202633333 | 1.150796975 |
| 0.0118       | 0.202477778 | 1.150672899 |
| 0.0335       | 0.202377778 | 1.150593143 |
| 0.078433333  | 0.202344444 | 1.150566559 |
| 0.281666667  | 0.202244444 | 1.150486811 |
| 0.0376       | 0.202133333 | 1.150398208 |
| 0.295866667  | 0.201655556 | 1.150017293 |
| 0.107733333  | 0.201622222 | 1.149990722 |
| -0.0646      | 0.201533333 | 1.14991987  |
| 0.0767       | 0.2015      | 1.149893302 |
| 0.099133333  | 0.201377778 | 1.149795889 |
| 0.143933333  | 0.201144444 | 1.149609943 |
| -0.0806      | 0.201122222 | 1.149592235 |
| -0.051066667 | 0.201022222 | 1.149512554 |
| 0.073333333  | 0.201011111 | 1.149503701 |
| -0.242233333 | 0.200888889 | 1.149406322 |
| 0.094166667  | 0.200777778 | 1.149317802 |
| 0.217233333  | 0.200722222 | 1.149273545 |
| -0.1457      | 0.200655556 | 1.149220438 |
| 0.1405       | 0.200555556 | 1.149140783 |
| -0.1003      | 0.2005      | 1.149096533 |
| 0.2225       | 0.200444444 | 1.149052284 |
| -0.0406      | 0.200355556 | 1.148981489 |
| 0.1051       | 0.200355556 | 1.148981489 |
| 0.117833333  | 0.2002      | 1.148857609 |
| 0.203833333  | 0.200166667 | 1.148831066 |
| 0.199833333  | 0.199866667 | 1.148592198 |

|              |             |             |
|--------------|-------------|-------------|
| 0.065866667  | 0.1997      | 1.148459515 |
| 0.071366667  | 0.1997      | 1.148459515 |
| 0.084133333  | 0.199666667 | 1.14843298  |
| 0.050333333  | 0.199644444 | 1.14841529  |
| -0.0247      | 0.199611111 | 1.148388757 |
| 0.034333333  | 0.1994      | 1.148220724 |
| 0.197733333  | 0.199388889 | 1.148211881 |
| 0.131233333  | 0.199233333 | 1.148088084 |
| 0.356066667  | 0.198955556 | 1.147867051 |
| 0.193766667  | 0.198822222 | 1.147760971 |
| 0.108466667  | 0.198755556 | 1.147707934 |
| 0.1015       | 0.198688889 | 1.1476549   |
| 0.0777       | 0.198577778 | 1.147566515 |
| 0.035033333  | 0.198566667 | 1.147557677 |
| 0.0837       | 0.198533333 | 1.147531163 |
| 0.0573       | 0.1985      | 1.14750465  |
| 0.068766667  | 0.198322222 | 1.147363256 |
| 0.237033333  | 0.198211111 | 1.147274894 |
| 0.009166667  | 0.198044444 | 1.147142363 |
| 0.2468       | 0.198022222 | 1.147124694 |
| 0.6057       | 0.198022222 | 1.147124694 |
| 0.0656       | 0.197911111 | 1.14703635  |
| 0.168066667  | 0.197866667 | 1.147001014 |
| 0.053433333  | 0.197822222 | 1.146965679 |
| 0.112266667  | 0.1978      | 1.146948012 |
| 0.162433333  | 0.197766667 | 1.146921513 |
| -0.1891      | 0.197677778 | 1.146850849 |
| 0.076033333  | 0.197566667 | 1.146762527 |
| 0.090966667  | 0.197566667 | 1.146762527 |
| 0.122166667  | 0.197533333 | 1.146736031 |
| -0.004566667 | 0.197422222 | 1.146647717 |
| 0.1434       | 0.197233333 | 1.146497599 |
| 0.077166667  | 0.197188889 | 1.14646228  |
| 0.068433333  | 0.197055556 | 1.146356329 |
| 0.022733333  | 0.1969      | 1.146232732 |
| 0.1127       | 0.196888889 | 1.146223904 |
| 0.160266667  | 0.1968      | 1.146153284 |
| 0.150233333  | 0.196755556 | 1.146117976 |
| 0.0482       | 0.196722222 | 1.146091495 |
| 0.3466       | 0.196711111 | 1.146082668 |
| 0.146533333  | 0.196677778 | 1.146056188 |
| -0.117066667 | 0.196677778 | 1.146056188 |
| -0.0782      | 0.196633333 | 1.146020883 |
| 0.101066667  | 0.1966      | 1.145994405 |
| 0.192033333  | 0.196422222 | 1.145853197 |
| -0.224166667 | 0.196266667 | 1.145729654 |
| 0.399933333  | 0.195866667 | 1.145412035 |

|              |             |             |
|--------------|-------------|-------------|
| -0.0454      | 0.195711111 | 1.14528854  |
| 0.174166667  | 0.1956      | 1.145200337 |
| 0.1354       | 0.195577778 | 1.145182697 |
| -0.014933333 | 0.1955      | 1.145120961 |
| 0.045633333  | 0.195477778 | 1.145103322 |
| -0.028766667 | 0.195455556 | 1.145085684 |
| 0.080466667  | 0.195277778 | 1.144944588 |
| 0.023233333  | 0.194955556 | 1.144688896 |
| 0.099333333  | 0.194877778 | 1.144627186 |
| 0.037033333  | 0.194822222 | 1.144583109 |
| 0.022366667  | 0.1948      | 1.144565479 |
| 0.0886       | 0.194744444 | 1.144521405 |
| 0.039933333  | 0.194688889 | 1.144477332 |
| 0.135866667  | 0.194633333 | 1.144433261 |
| -0.0377      | 0.194488889 | 1.144318685 |
| 0.146866667  | 0.194477778 | 1.144309872 |
| 0.176566667  | 0.194344444 | 1.14420412  |
| 0.179966667  | 0.194222222 | 1.14410719  |
| 0.121933333  | 0.194177778 | 1.144071944 |
| 0.0741       | 0.1941      | 1.144010267 |
| -0.074866667 | 0.193844444 | 1.143807638 |
| 0.119166667  | 0.193788889 | 1.143763593 |
| -0.0798      | 0.193622222 | 1.143631468 |
| -0.0512      | 0.193544444 | 1.143569815 |
| -0.006433333 | 0.193433333 | 1.143481744 |
| 0.130066667  | 0.193277778 | 1.143358457 |
| 0.326666667  | 0.193133333 | 1.143243989 |
| 0.1342       | 0.1931      | 1.143217574 |
| 0.156633333  | 0.193077778 | 1.143199965 |
| 0.0743       | 0.193055556 | 1.143182356 |
| 0.004733333  | 0.193055556 | 1.143182356 |
| -0.070933333 | 0.193044444 | 1.143173552 |
| 0.0394       | 0.193033333 | 1.143164748 |
| 0.1176       | 0.192944444 | 1.143094316 |
| -0.029566667 | 0.192877778 | 1.143041495 |
| 0.0222       | 0.192777778 | 1.142962268 |
| 0.2097       | 0.192777778 | 1.142962268 |
| 0.099366667  | 0.192733333 | 1.142927058 |
| 0.0978       | 0.192644444 | 1.142856641 |
| 0.052333333  | 0.192566667 | 1.14279503  |
| 0.035566667  | 0.192477778 | 1.142724621 |
| 0.119966667  | 0.192277778 | 1.142566216 |
| -0.120666667 | 0.192277778 | 1.142566216 |
| 0.089066667  | 0.192244444 | 1.142539818 |
| -0.0299      | 0.192122222 | 1.142443028 |
| 0.202433333  | 0.191977778 | 1.142328651 |
| 0.067166667  | 0.191777778 | 1.142170302 |

|              |             |             |
|--------------|-------------|-------------|
| 0.028333333  | 0.191766667 | 1.142161505 |
| 0.803766667  | 0.191333333 | 1.141818493 |
| -0.021466667 | 0.191233333 | 1.141739351 |
| 0.016633333  | 0.191133333 | 1.141660214 |
| 0.048933333  | 0.1911      | 1.141633836 |
| 0.122733333  | 0.190833333 | 1.141422837 |
| 0.253033333  | 0.190788889 | 1.141387674 |
| -0.009533333 | 0.190777778 | 1.141378884 |
| 0.140633333  | 0.190644444 | 1.141273403 |
| 0.1891       | 0.190533333 | 1.14118551  |
| 0.144433333  | 0.190222222 | 1.140939444 |
| 0.0196       | 0.190166667 | 1.14089551  |
| 0.242266667  | 0.190166667 | 1.14089551  |
| 0.051066667  | 0.190066667 | 1.140816432 |
| 0.152166667  | 0.190044444 | 1.140798859 |
| 0.100466667  | 0.190022222 | 1.140781287 |
| 0.015        | 0.189966667 | 1.140737359 |
| 0.1122       | 0.189966667 | 1.140737359 |
| 0.119766667  | 0.189855556 | 1.140649507 |
| 0.027833333  | 0.189822222 | 1.140623153 |
| 0.071833333  | 0.1898      | 1.140605583 |
| 0.0689       | 0.189766667 | 1.14057923  |
| 0.117533333  | 0.189622222 | 1.14046504  |
| 0.077833333  | 0.189433333 | 1.140315731 |
| 0.061433333  | 0.189277778 | 1.140192785 |
| 0.154633333  | 0.189211111 | 1.140140098 |
| 0.230033333  | 0.189211111 | 1.140140098 |
| -0.027666667 | 0.189177778 | 1.140113756 |
| 0.2014       | 0.189055556 | 1.140017172 |
| 0.1133       | 0.189033333 | 1.139999612 |
| -0.100533333 | 0.188911111 | 1.139903038 |
| 0.028        | 0.188911111 | 1.139903038 |
| 0.091566667  | 0.188855556 | 1.139859143 |
| -0.105433333 | 0.188722222 | 1.139753802 |
| 0.0305       | 0.188333333 | 1.139446615 |
| 0.184566667  | 0.188333333 | 1.139446615 |
| 0.073733333  | 0.188311111 | 1.139429064 |
| 0.201366667  | 0.188277778 | 1.139402738 |
| 0.143566667  | 0.188222222 | 1.139358862 |
| 0.0541       | 0.188066667 | 1.13923602  |
| -0.034933333 | 0.188066667 | 1.13923602  |
| 0.3209       | 0.188044444 | 1.139218472 |
| -0.0418      | 0.187988889 | 1.139174604 |
| 0.136833333  | 0.187944444 | 1.13913951  |
| 0.1313       | 0.187933333 | 1.139130737 |
| -0.0636      | 0.187777778 | 1.139007919 |
| -0.095666667 | 0.187766667 | 1.138999147 |

|              |             |             |
|--------------|-------------|-------------|
| -0.061566667 | 0.187566667 | 1.138841259 |
| 0.275866667  | 0.187522222 | 1.138806176 |
| 0.1405       | 0.187311111 | 1.138639545 |
| 0.100933333  | 0.187011111 | 1.138402797 |
| 0.0838       | 0.186722222 | 1.138174863 |
| -0.0135      | 0.186644444 | 1.138113504 |
| 0.041466667  | 0.186633333 | 1.138104738 |
| 0.066833333  | 0.186611111 | 1.138087208 |
| 0.110166667  | 0.186533333 | 1.138025854 |
| 0.041966667  | 0.186511111 | 1.138008325 |
| 0.0315       | 0.186488889 | 1.137990796 |
| -0.015566667 | 0.1862      | 1.137762944 |
| 0.100433333  | 0.186188889 | 1.137754182 |
| -0.217133333 | 0.186111111 | 1.137692845 |
| -0.0665      | 0.186022222 | 1.137622751 |
| 0.287533333  | 0.186022222 | 1.137622751 |
| 0.150333333  | 0.185933333 | 1.137552661 |
| -0.0611      | 0.185911111 | 1.137535139 |
| -0.047866667 | 0.185811111 | 1.137456293 |
| 0.292433333  | 0.185744444 | 1.137403733 |
| -0.0238      | 0.185711111 | 1.137377454 |
| 0.034066667  | 0.185677778 | 1.137351175 |
| 0.152166667  | 0.185666667 | 1.137342416 |
| 0.135933333  | 0.185644444 | 1.137324897 |
| -0.055633333 | 0.185633333 | 1.137316138 |
| 0.084233333  | 0.185555556 | 1.137254825 |
| 0.0612       | 0.185522222 | 1.137228549 |
| 0.027666667  | 0.185511111 | 1.137219791 |
| -0.0503      | 0.185288889 | 1.137044635 |
| 0.2065       | 0.185222222 | 1.136992094 |
| 0.043633333  | 0.185044444 | 1.136851995 |
| 0.0676       | 0.184966667 | 1.136790707 |
| 0.1764       | 0.184955556 | 1.136781952 |
| 0.125633333  | 0.184833333 | 1.136685651 |
| 0.193833333  | 0.184811111 | 1.136668142 |
| 0.0497       | 0.184666667 | 1.136554343 |
| 0.033633333  | 0.184611111 | 1.136510577 |
| 0.170233333  | 0.184555556 | 1.136466813 |
| -0.046533333 | 0.184433333 | 1.136370538 |
| 0.124566667  | 0.184311111 | 1.136274271 |
| 0.028666667  | 0.184277778 | 1.136248018 |
| -0.007966667 | 0.184133333 | 1.136134261 |
| -0.204233333 | 0.183955556 | 1.135994268 |
| 0.218466667  | 0.183955556 | 1.135994268 |
| 0.0506       | 0.183844444 | 1.135906781 |
| 0.019066667  | 0.183788889 | 1.135863041 |
| 0.265        | 0.183777778 | 1.135854293 |

|              |             |             |
|--------------|-------------|-------------|
| 0.076933333  | 0.183633333 | 1.135740575 |
| 0.881766667  | 0.183588889 | 1.135705587 |
| -0.004866667 | 0.183566667 | 1.135688094 |
| 0.399966667  | 0.183488889 | 1.135626869 |
| 0.223        | 0.183422222 | 1.135574393 |
| 0.196366667  | 0.1833      | 1.135478194 |
| 0.032866667  | 0.183033333 | 1.135268332 |
| -0.030133333 | 0.182988889 | 1.135233359 |
| 0.270966667  | 0.1829      | 1.135163416 |
| 0.140266667  | 0.182888889 | 1.135154673 |
| 0.300233333  | 0.182888889 | 1.135154673 |
| 0.0606       | 0.182888889 | 1.135154673 |
| 0.220133333  | 0.182866667 | 1.135137188 |
| 0.077366667  | 0.182755556 | 1.135049768 |
| 0.038833333  | 0.182733333 | 1.135032284 |
| 0.226233333  | 0.182622222 | 1.134944872 |
| 0.244733333  | 0.182444444 | 1.134805025 |
| 0.1155       | 0.182355556 | 1.134735109 |
| -0.012233333 | 0.182311111 | 1.134700152 |
| 0.0681       | 0.1823      | 1.134691413 |
| 0.2006       | 0.182077778 | 1.134516647 |
| -0.026333333 | 0.182033333 | 1.134481697 |
| 0.063533333  | 0.181966667 | 1.134429274 |
| 0.052233333  | 0.181944444 | 1.1344118   |
| 0.1175       | 0.181911111 | 1.13438559  |
| 0.089933333  | 0.181844444 | 1.134333171 |
| 0.0329       | 0.181788889 | 1.134289491 |
| 0.1021       | 0.181766667 | 1.134272019 |
| -0.0596      | 0.181688889 | 1.134210871 |
| -0.034933333 | 0.181677778 | 1.134202136 |
| 0.1104       | 0.181644444 | 1.13417593  |
| 0.1646       | 0.181622222 | 1.13415846  |
| 0.2837       | 0.1816      | 1.134140991 |
| 0.1386       | 0.181566667 | 1.134114787 |
| -0.078766667 | 0.181522222 | 1.134079849 |
| -4.00E-04    | 0.181411111 | 1.13399251  |
| -0.005766667 | 0.181377778 | 1.133966309 |
| 0.037966667  | 0.181055556 | 1.133713069 |
| 0.128666667  | 0.180944444 | 1.133625758 |
| 0.089933333  | 0.180844444 | 1.133547184 |
| 0.3197       | 0.180822222 | 1.133529724 |
| 0.036133333  | 0.180744444 | 1.133468615 |
| 0.105233333  | 0.180711111 | 1.133442427 |
| 0.0908       | 0.180688889 | 1.133424968 |
| 0.578233333  | 0.180655556 | 1.133398781 |
| 0.157266667  | 0.180644444 | 1.133390052 |
| -0.0818      | 0.180633333 | 1.133381323 |



|              |             |             |
|--------------|-------------|-------------|
| 0.220566667  | 0.180466667 | 1.133250397 |
| 0.134466667  | 0.180388889 | 1.133189304 |
| 0.069566667  | 0.180377778 | 1.133180576 |
| -0.027666667 | 0.180322222 | 1.13313694  |
| 0.273666667  | 0.180277778 | 1.133102033 |
| 0.079033333  | 0.180222222 | 1.1330584   |
| -0.0173      | 0.180122222 | 1.132979865 |
| 0.060466667  | 0.180044444 | 1.132918786 |
| 0.0595       | 0.179911111 | 1.132814087 |
| 0.843966667  | 0.179888889 | 1.132796638 |
| 0.129766667  | 0.179855556 | 1.132770465 |
| 0.0521       | 0.179722222 | 1.13266578  |
| 0.0356       | 0.1797      | 1.132648333 |
| 0.060133333  | 0.1797      | 1.132648333 |
| 0.087433333  | 0.179644444 | 1.132604718 |
| 0.017733333  | 0.179622222 | 1.132587272 |
| -0.016966667 | 0.1793      | 1.13233434  |
| 0.100566667  | 0.179144444 | 1.132212255 |
| 0.059033333  | 0.178988889 | 1.132090183 |
| 0.174033333  | 0.178988889 | 1.132090183 |
| 0.1899       | 0.178955556 | 1.132064027 |
| 0.263066667  | 0.178833333 | 1.131968124 |
| 0.0156       | 0.1788      | 1.131941971 |
| -0.870566667 | 0.178755556 | 1.1319071   |
| -0.016533333 | 0.178688889 | 1.131854796 |
| 0.013966667  | 0.178533333 | 1.131732763 |
| -0.197266667 | 0.178166667 | 1.131445165 |
| 0.043466667  | 0.178077778 | 1.131375455 |
| 0.077166667  | 0.1777      | 1.131079237 |
| 0.031933333  | 0.177577778 | 1.130983418 |
| 0.186366667  | 0.177544444 | 1.130957287 |
| 0.110766667  | 0.177511111 | 1.130931157 |
| 0.186666667  | 0.177455556 | 1.130887608 |
| 0.114        | 0.177444444 | 1.130878898 |
| 0.103166667  | 0.177277778 | 1.130748261 |
| 0.1191       | 0.177244444 | 1.130722136 |
| 0.208233333  | 0.1772      | 1.130687303 |
| -0.061166667 | 0.177188889 | 1.130678595 |
| 0.159866667  | 0.177144444 | 1.130643763 |
| 0.183466667  | 0.177088889 | 1.130600225 |
| 0.110466667  | 0.176966667 | 1.130504447 |
| 0.139        | 0.176888889 | 1.130443501 |
| -0.094966667 | 0.176688889 | 1.130286799 |
| 0.062466667  | 0.176655556 | 1.130260684 |
| 0.109966667  | 0.176622222 | 1.13023457  |
| 0.030433333  | 0.1766      | 1.130217161 |
| 0.260466667  | 0.176566667 | 1.130191048 |

|              |             |             |
|--------------|-------------|-------------|
| 0.07766667   | 0.176455556 | 1.130104008 |
| 0.002833333  | 0.176377778 | 1.130043084 |
| -0.111866667 | 0.176344444 | 1.130016975 |
| 0.217733333  | 0.176322222 | 1.129999569 |
| 0.1684       | 0.176266667 | 1.129956055 |
| 0.033666667  | 0.176144444 | 1.129860332 |
| 0.176833333  | 0.176088889 | 1.129816824 |
| 0.255966667  | 0.175777778 | 1.12957321  |
| 0.132833333  | 0.175622222 | 1.129451423 |
| 0.0548       | 0.175611111 | 1.129442724 |
| 0.086933333  | 0.1756      | 1.129434026 |
| 0.095933333  | 0.175566667 | 1.12940793  |
| 0.090233333  | 0.175333333 | 1.129225281 |
| 0.310566667  | 0.175322222 | 1.129216584 |
| 0.022266667  | 0.175211111 | 1.129129619 |
| -0.0276      | 0.175066667 | 1.129016575 |
| 0.074733333  | 0.175044444 | 1.128999185 |
| 0.094866667  | 0.175022222 | 1.128981795 |
| 0.101733333  | 0.1749      | 1.128886154 |
| 0.0264       | 0.174855556 | 1.128851377 |
| 0.153166667  | 0.174822222 | 1.128825295 |
| 0.1545       | 0.174633333 | 1.12867751  |
| 0.146733333  | 0.174633333 | 1.12867751  |
| 0.008133333  | 0.174333333 | 1.128442833 |
| -0.0202      | 0.1742      | 1.128338548 |
| -0.0901      | 0.173955556 | 1.128147383 |
| -0.0149      | 0.173933333 | 1.128130006 |
| 0.067333333  | 0.173911111 | 1.128112629 |
| 0.010233333  | 0.173811111 | 1.128034437 |
| 0.057933333  | 0.173755556 | 1.127990999 |
| 0.136933333  | 0.173755556 | 1.127990999 |
| 0.003566667  | 0.173622222 | 1.127886755 |
| 0.120966667  | 0.173588889 | 1.127860696 |
| 0.130033333  | 0.173566667 | 1.127843323 |
| -0.0637      | 0.173533333 | 1.127817265 |
| 0.175633333  | 0.173322222 | 1.127652242 |
| -0.101966667 | 0.173266667 | 1.127608819 |
| 0.061566667  | 0.173188889 | 1.12754803  |
| -0.0365      | 0.173088889 | 1.127469877 |
| 0.127533333  | 0.173022222 | 1.127417778 |
| 0.0922       | 0.172966667 | 1.127374364 |
| 0.141466667  | 0.172922222 | 1.127339634 |
| 0.132133333  | 0.172755556 | 1.127209406 |
| 0.3457       | 0.172744444 | 1.127200725 |
| 0.1305       | 0.172666667 | 1.127139957 |
| -0.083066667 | 0.172633333 | 1.127113915 |
| 0.119866667  | 0.172611111 | 1.127096554 |

|              |             |             |
|--------------|-------------|-------------|
| 0.1451       | 0.172522222 | 1.127027112 |
| 0.1484       | 0.1724      | 1.126931637 |
| 0.0827       | 0.172388889 | 1.126922958 |
| -0.0545      | 0.172266667 | 1.126827491 |
| 0.2128       | 0.172188889 | 1.126766744 |
| 0.1951       | 0.172111111 | 1.126706    |
| -0.073833333 | 0.171855556 | 1.126506436 |
| 0.182033333  | 0.171822222 | 1.126480408 |
| 0.090766667  | 0.1718      | 1.126463057 |
| -0.008833333 | 0.171666667 | 1.126358954 |
| 0.222166667  | 0.171633333 | 1.12633293  |
| 0.1446       | 0.171633333 | 1.12633293  |
| -0.082033333 | 0.171555556 | 1.12627221  |
| 0.1509       | 0.1715      | 1.12622884  |
| 0.021766667  | 0.171422222 | 1.126168125 |
| -0.0352      | 0.171411111 | 1.126159451 |
| 0.057333333  | 0.1714      | 1.126150778 |
| -0.010433333 | 0.171366667 | 1.126124759 |
| 0.154133333  | 0.171311111 | 1.126081395 |
| 0.012        | 0.171255556 | 1.126038032 |
| -0.136266667 | 0.171244444 | 1.12602936  |
| 0.129733333  | 0.171177778 | 1.125977327 |
| 0.0876       | 0.171       | 1.125838586 |
| 0.3262       | 0.170911111 | 1.125769222 |
| 0.093        | 0.170866667 | 1.125734541 |
| 0.107833333  | 0.170744444 | 1.125639175 |
| 0.1042       | 0.170711111 | 1.125613168 |
| 0.0918       | 0.170611111 | 1.125535149 |
| -0.128466667 | 0.170522222 | 1.125465804 |
| 0.0282       | 0.170511111 | 1.125457136 |
| 0.094833333  | 0.170433333 | 1.125396462 |
| 0.138133333  | 0.170422222 | 1.125387795 |
| 0.033033333  | 0.170388889 | 1.125361793 |
| 0.181333333  | 0.170177778 | 1.12519713  |
| 0.143566667  | 0.170088889 | 1.125127805 |
| 0.364266667  | 0.170066667 | 1.125110475 |
| -0.0173      | 0.17        | 1.125058485 |
| 0.1681       | 0.169911111 | 1.124989169 |
| 0.099466667  | 0.169833333 | 1.12492852  |
| 0.007733333  | 0.169733333 | 1.124850549 |
| 0.070433333  | 0.169644444 | 1.124781246 |
| 0.090733333  | 0.169588889 | 1.124737933 |
| 0.188266667  | 0.169577778 | 1.124729271 |
| 0.022466667  | 0.169544444 | 1.124703284 |
| 0.164266667  | 0.169522222 | 1.12468596  |
| -0.056733333 | 0.169366667 | 1.1245647   |
| 0.040066667  | 0.169211111 | 1.124443453 |

|              |             |             |
|--------------|-------------|-------------|
| 0.094166667  | 0.169211111 | 1.124443453 |
| 0.145366667  | 0.168888889 | 1.124192339 |
| 0.3457       | 0.168877778 | 1.124183681 |
| 0.0506       | 0.168788889 | 1.124114419 |
| -0.073633333 | 0.168711111 | 1.124053818 |
| 0.189633333  | 0.168622222 | 1.123984564 |
| 0.097        | 0.168533333 | 1.123915314 |
| 0.1049       | 0.168511111 | 1.123898002 |
| 0.1593       | 0.168433333 | 1.123837412 |
| 0.019866667  | 0.168411111 | 1.123820102 |
| 0.196666667  | 0.1683      | 1.123733553 |
| 0.0528       | 0.168222222 | 1.123672972 |
| 0.199033333  | 0.168211111 | 1.123664318 |
| 0.0882       | 0.167988889 | 1.12349125  |
| -0.0121      | 0.167977778 | 1.123482598 |
| 0.001333333  | 0.167788889 | 1.123335512 |
| 0.087666667  | 0.167744444 | 1.123300907 |
| 0.1026       | 0.167711111 | 1.123274953 |
| 0.278633333  | 0.167655556 | 1.123231699 |
| 0.3537       | 0.167622222 | 1.123205747 |
| 0.0046       | 0.1676      | 1.123188446 |
| 0.1793       | 0.1676      | 1.123188446 |
| 0.128433333  | 0.167588889 | 1.123179796 |
| -0.018633333 | 0.167577778 | 1.123171145 |
| -0.0811      | 0.167477778 | 1.123093296 |
| 0.0329       | 0.167466667 | 1.123084646 |
| 0.044166667  | 0.167388889 | 1.123024101 |
| -0.071533333 | 0.167233333 | 1.122903019 |
| 0.344566667  | 0.167211111 | 1.122885723 |
| -0.118466667 | 0.167155556 | 1.122842484 |
| 0.273366667  | 0.167088889 | 1.122790599 |
| -0.122933333 | 0.167022222 | 1.122738716 |
| -0.038166667 | 0.166966667 | 1.122695482 |
| -0.031433333 | 0.166888889 | 1.122634957 |
| -0.056766667 | 0.166855556 | 1.122609019 |
| 0.034633333  | 0.166855556 | 1.122609019 |
| 0.0899       | 0.166844444 | 1.122600374 |
| -0.045       | 0.166777778 | 1.1225485   |
| -0.013466667 | 0.166655556 | 1.122453404 |
| 0.160666667  | 0.166533333 | 1.122358316 |
| 0.119233333  | 0.166455556 | 1.122297809 |
| 0.0108       | 0.166433333 | 1.122280522 |
| -0.008633333 | 0.166422222 | 1.122271879 |
| 0.057066667  | 0.166311111 | 1.122185449 |
| 0.087        | 0.166311111 | 1.122185449 |
| 0.0901       | 0.166133333 | 1.122047175 |
| 0.0972       | 0.1661      | 1.12202125  |

|              |             |             |
|--------------|-------------|-------------|
| 0.159166667  | 0.166044444 | 1.121978044 |
| 0.0015       | 0.166044444 | 1.121978044 |
| -0.078966667 | 0.166022222 | 1.121960762 |
| 0.0605       | 0.166011111 | 1.121952121 |
| 0.123066667  | 0.165977778 | 1.121926199 |
| -0.021833333 | 0.1659      | 1.121865716 |
| -0.014833333 | 0.165766667 | 1.121762038 |
| 0.024833333  | 0.165755556 | 1.121753399 |
| 0.173066667  | 0.165688889 | 1.121701564 |
| -0.005333333 | 0.165544444 | 1.121589264 |
| 0.201666667  | 0.165522222 | 1.121571988 |
| 0.0704       | 0.165522222 | 1.121571988 |
| -0.045833333 | 0.165466667 | 1.121528799 |
| 0.214966667  | 0.165433333 | 1.121502886 |
| 0.030666667  | 0.165388889 | 1.121468337 |
| -0.099833333 | 0.165366667 | 1.121451063 |
| 0.149466667  | 0.165344444 | 1.121433789 |
| 0.1438       | 0.165344444 | 1.121433789 |
| 0.203666667  | 0.165288889 | 1.121390606 |
| 0.236433333  | 0.165188889 | 1.121312879 |
| 0.015666667  | 0.165077778 | 1.121226523 |
| 0.027066667  | 0.165055556 | 1.121209253 |
| 0.407633333  | 0.164922222 | 1.121105636 |
| 0.1554       | 0.164855556 | 1.121053831 |
| 0.136233333  | 0.164844444 | 1.121045197 |
| -0.000466667 | 0.164766667 | 1.120984762 |
| 0.3775       | 0.164622222 | 1.120872533 |
| 0.0609       | 0.164544444 | 1.120812107 |
| 0.192533333  | 0.164533333 | 1.120803475 |
| 0.077866667  | 0.164511111 | 1.120786211 |
| 0.023366667  | 0.1645      | 1.120777579 |
| -0.1568      | 0.164388889 | 1.120691264 |
| 0.0892       | 0.164388889 | 1.120691264 |
| 0.0669       | 0.164377778 | 1.120682633 |
| 0.114466667  | 0.1643      | 1.120622217 |
| 0.058133333  | 0.164244444 | 1.120579065 |
| 0.0158       | 0.164133333 | 1.120492765 |
| 0.069966667  | 0.164077778 | 1.120449618 |
| 0.050666667  | 0.163988889 | 1.120380585 |
| -0.228033333 | 0.163888889 | 1.120302929 |
| 0.0871       | 0.163622222 | 1.120095872 |
| -0.078433333 | 0.163511111 | 1.12000961  |
| 0.145733333  | 0.163422222 | 1.119940605 |
| -0.049666667 | 0.163422222 | 1.119940605 |
| 0.067133333  | 0.163377778 | 1.119906104 |
| 0.1221       | 0.163333333 | 1.119871604 |
| 0.041166667  | 0.163266667 | 1.119819856 |

|              |             |             |
|--------------|-------------|-------------|
| 0.168066667  | 0.163233333 | 1.119793983 |
| 0.054533333  | 0.163033333 | 1.119638758 |
| -0.005133333 | 0.163022222 | 1.119630134 |
| -0.1073      | 0.162844444 | 1.119492175 |
| 0.192566667  | 0.162755556 | 1.119423202 |
| -0.127133333 | 0.162633333 | 1.119328371 |
| 0.3248       | 0.162622222 | 1.11931975  |
| 0.0904       | 0.162622222 | 1.11931975  |
| -0.0312      | 0.1626      | 1.119302509 |
| -0.437933333 | 0.1626      | 1.119302509 |
| 0.202        | 0.162588889 | 1.119293889 |
| -0.0057      | 0.162477778 | 1.119207688 |
| 0.070533333  | 0.162377778 | 1.119130113 |
| 0.188366667  | 0.162244444 | 1.119026688 |
| 0.011833333  | 0.162244444 | 1.119026688 |
| 0.080566667  | 0.162188889 | 1.118983598 |
| -0.0401      | 0.162022222 | 1.118854335 |
| 0.0345       | 0.1619      | 1.118759552 |
| 0.3228       | 0.161777778 | 1.118664777 |
| -0.025066667 | 0.161688889 | 1.118595855 |
| 0.0375       | 0.161577778 | 1.118509708 |
| 0.2067       | 0.1615      | 1.118449409 |
| 0.063333333  | 0.161444444 | 1.11840634  |
| -0.027533333 | 0.161366667 | 1.118346047 |
| 0.052833333  | 0.161311111 | 1.118302982 |
| 0.285        | 0.161177778 | 1.118199634 |
| -0.009133333 | 0.161022222 | 1.118079073 |
| 0.310933333  | 0.1608      | 1.117906865 |
| 0.2063       | 0.160788889 | 1.117898256 |
| 0.0797       | 0.160677778 | 1.117812163 |
| 0.027233333  | 0.160622222 | 1.117769119 |
| 0.166133333  | 0.1606      | 1.117751901 |
| 0.137033333  | 0.160588889 | 1.117743293 |
| -0.0317      | 0.160577778 | 1.117734684 |
| -0.197466667 | 0.160511111 | 1.117683035 |
| 0.3089       | 0.160488889 | 1.11766582  |
| 0.162966667  | 0.160455556 | 1.117639996 |
| 0.1066       | 0.160444444 | 1.117631389 |
| -0.004766667 | 0.160411111 | 1.117605566 |
| -0.033333333 | 0.160311111 | 1.117528102 |
| 0.111866667  | 0.160266667 | 1.117493676 |
| 0.0366       | 0.160222222 | 1.11745925  |
| 0.008533333  | 0.160144444 | 1.117399008 |
| 0.060733333  | 0.1601      | 1.117364585 |
| 0.111166667  | 0.160055556 | 1.117330164 |
| 0.077166667  | 0.160055556 | 1.117330164 |
| 0.0314       | 0.16        | 1.117287138 |

|              |             |             |
|--------------|-------------|-------------|
| -0.0309      | 0.1599      | 1.117209696 |
| 0.1667       | 0.159877778 | 1.117192488 |
| 0.221466667  | 0.159833333 | 1.117158071 |
| 0.0698       | 0.159822222 | 1.117149468 |
| 0.1007       | 0.159777778 | 1.117115053 |
| 0.039333333  | 0.159533333 | 1.116925789 |
| 0.187666667  | 0.159522222 | 1.116917187 |
| 0.1821       | 0.159388889 | 1.116813967 |
| 0.113233333  | 0.159344444 | 1.116779562 |
| 0.262233333  | 0.1593      | 1.116745158 |
| 0.077833333  | 0.1592      | 1.116667754 |
| 0.2453       | 0.159188889 | 1.116659154 |
| 0.027533333  | 0.159033333 | 1.116538759 |
| 0.110366667  | 0.159022222 | 1.11653016  |
| 0.130033333  | 0.159011111 | 1.116521561 |
| 0.192866667  | 0.158955556 | 1.116478567 |
| -0.136866667 | 0.158933333 | 1.116461369 |
| 0.1832       | 0.158911111 | 1.116444172 |
| 0.002666667  | 0.158811111 | 1.116366789 |
| 0.1994       | 0.158677778 | 1.11626362  |
| -0.0362      | 0.158644444 | 1.116237829 |
| 0.104133333  | 0.158588889 | 1.116194845 |
| 0.208566667  | 0.158566667 | 1.116177652 |
| 0.115033333  | 0.1585      | 1.116126075 |
| 0.158366667  | 0.158444444 | 1.116083096 |
| -0.089533333 | 0.158366667 | 1.116022928 |
| 0.2453       | 0.158366667 | 1.116022928 |
| 0.0713       | 0.1583      | 1.115971358 |
| 0.084766667  | 0.158222222 | 1.115911196 |
| 0.242466667  | 0.158055556 | 1.115782288 |
| -0.049966667 | 0.158       | 1.115739322 |
| 0.0353       | 0.157911111 | 1.11567058  |
| 0.165566667  | 0.1579      | 1.115661988 |
| 0.1119       | 0.157877778 | 1.115644803 |
| -0.040433333 | 0.157833333 | 1.115610435 |
| 0.1393       | 0.1578      | 1.115584659 |
| 0.125466667  | 0.157633333 | 1.115455789 |
| 0.120733333  | 0.157355556 | 1.115241039 |
| 0.2261       | 0.157355556 | 1.115241039 |
| 0.080933333  | 0.157333333 | 1.11522386  |
| 0.107266667  | 0.1573      | 1.115198094 |
| 0.015133333  | 0.157266667 | 1.115172327 |
| 0.076233333  | 0.157244444 | 1.11515515  |
| 0.277233333  | 0.157211111 | 1.115129385 |
| 0.096433333  | 0.157166667 | 1.115095032 |
| 0.012666667  | 0.157033333 | 1.11499198  |
| -0.099766667 | 0.1569      | 1.114888938 |

|              |             |             |
|--------------|-------------|-------------|
| -0.032833333 | 0.1569      | 1.114888938 |
| -0.0531      | 0.156833333 | 1.11483742  |
| 0.071333333  | 0.156822222 | 1.114828834 |
| 0.2369       | 0.156822222 | 1.114828834 |
| 0.067133333  | 0.156777778 | 1.114794491 |
| -0.039133333 | 0.156722222 | 1.114751563 |
| 0.053466667  | 0.1567      | 1.114734392 |
| 0.001766667  | 0.156622222 | 1.114674297 |
| 0.060766667  | 0.156622222 | 1.114674297 |
| 0.090833333  | 0.156511111 | 1.114588452 |
| -0.0718      | 0.156477778 | 1.1145627   |
| 0.101666667  | 0.156477778 | 1.1145627   |
| 0.1198       | 0.156433333 | 1.114528364 |
| 0.1346       | 0.156422222 | 1.114519781 |
| 0.2192       | 0.156366667 | 1.114476864 |
| 0.0637       | 0.156033333 | 1.114219394 |
| 0.075866667  | 0.155933333 | 1.114142165 |
| -0.091266667 | 0.155822222 | 1.114056361 |
| -0.1338      | 0.155777778 | 1.114022042 |
| -0.067233333 | 0.155744444 | 1.113996303 |
| 0.041133333  | 0.155722222 | 1.113979144 |
| 0.109633333  | 0.155333333 | 1.113678903 |
| -0.047966667 | 0.1553      | 1.113653172 |
| 0.099533333  | 0.155188889 | 1.113567406 |
| 0.109533333  | 0.155188889 | 1.113567406 |
| 0.105066667  | 0.155033333 | 1.113447344 |
| -0.049933333 | 0.155022222 | 1.113438769 |
| 0.1131       | 0.154988889 | 1.113413043 |
| 0.112133333  | 0.154977778 | 1.113404468 |
| 0.160366667  | 0.154955556 | 1.113387318 |
| 0.135966667  | 0.154955556 | 1.113387318 |
| -0.006133333 | 0.154911111 | 1.113353019 |
| 0.2776       | 0.154888889 | 1.11333587  |
| 0.023333333  | 0.154844444 | 1.113301572 |
| 0.0131       | 0.154777778 | 1.113250128 |
| -0.047466667 | 0.154766667 | 1.113241554 |
| 0.207933333  | 0.154722222 | 1.11320726  |
| 0.374633333  | 0.154655556 | 1.11315582  |
| -0.000433333 | 0.154533333 | 1.113061519 |
| 0.0693       | 0.154522222 | 1.113052947 |
| 0.0174       | 0.154466667 | 1.113010086 |
| 0.072466667  | 0.154422222 | 1.112975799 |
| 0.111166667  | 0.1544      | 1.112958655 |
| 0.0195       | 0.154355556 | 1.11292437  |
| 0.066833333  | 0.154244444 | 1.11283866  |
| 0.1417       | 0.154188889 | 1.112795807 |
| 0.0516       | 0.154155556 | 1.112770096 |



|              |             |             |
|--------------|-------------|-------------|
| 0.207133333  | 0.154088889 | 1.112718677 |
| 0.035533333  | 0.154033333 | 1.112675829 |
| 0.0543       | 0.153944444 | 1.112607275 |
| 0.047733333  | 0.153844444 | 1.112530158 |
| 0.218233333  | 0.153566667 | 1.112315971 |
| 0.105566667  | 0.153544444 | 1.112298838 |
| 0.083533333  | 0.153455556 | 1.112230308 |
| -0.156033333 | 0.153344444 | 1.112144651 |
| -0.039366667 | 0.153333333 | 1.112136086 |
| -0.090966667 | 0.153322222 | 1.112127521 |
| 0.046333333  | 0.153322222 | 1.112127521 |
| 0.176066667  | 0.153322222 | 1.112127521 |
| 0.0927       | 0.1533      | 1.11211039  |
| 0.210366667  | 0.153211111 | 1.112041872 |
| -0.004133333 | 0.153088889 | 1.111947666 |
| 0.037933333  | 0.153055556 | 1.111921975 |
| 0.138533333  | 0.153011111 | 1.111887721 |
| 0.1317       | 0.152966667 | 1.111853468 |
| 0.036333333  | 0.152966667 | 1.111853468 |
| 0.022433333  | 0.152933333 | 1.111827779 |
| -0.069133333 | 0.1529      | 1.111802091 |
| 0.054766667  | 0.152855556 | 1.11176784  |
| 0.052133333  | 0.152822222 | 1.111742153 |
| -0.0038      | 0.152744444 | 1.111682219 |
| -0.053666667 | 0.152677778 | 1.11163085  |
| 0.1329       | 0.152666667 | 1.111622289 |
| 0.095233333  | 0.152655556 | 1.111613727 |
| 0.3438       | 0.152633333 | 1.111596605 |
| 0.046133333  | 0.1525      | 1.111493876 |
| -0.1451      | 0.152355556 | 1.111382598 |
| 0.0652       | 0.152255556 | 1.111305565 |
| 0.193733333  | 0.152222222 | 1.111279889 |
| 0.039466667  | 0.152211111 | 1.11127133  |
| 0.142633333  | 0.152177778 | 1.111245655 |
| 0.342733333  | 0.152133333 | 1.111211422 |
| 0.284        | 0.152044444 | 1.111142959 |
| 0.026733333  | 0.152044444 | 1.111142959 |
| 0.061566667  | 0.151977778 | 1.111091614 |
| -0.274733333 | 0.151822222 | 1.110971819 |
| 0.1463       | 0.151677778 | 1.110860593 |
| -0.033533333 | 0.1516      | 1.110800707 |
| 0.076933333  | 0.1515      | 1.110723714 |
| 0.088066667  | 0.1513      | 1.110569746 |
| 0.148866667  | 0.151244444 | 1.110526981 |
| 0.068766667  | 0.1512      | 1.11049277  |
| 0.052433333  | 0.151088889 | 1.110407247 |
| -0.109       | 0.151055556 | 1.110381592 |

|              |             |             |
|--------------|-------------|-------------|
| 0.1074       | 0.150955556 | 1.110304628 |
| -0.054066667 | 0.150877778 | 1.110244772 |
| -0.138033333 | 0.150766667 | 1.110159268 |
| -0.035433333 | 0.150755556 | 1.110150718 |
| 0.017766667  | 0.150755556 | 1.110150718 |
| 0.124066667  | 0.150744444 | 1.110142168 |
| 0.1423       | 0.150733333 | 1.110133618 |
| 0.008        | 0.150688889 | 1.11009942  |
| -0.179766667 | 0.1506      | 1.110031025 |
| -0.0868      | 0.150522222 | 1.109971183 |
| -0.0213      | 0.150488889 | 1.109945538 |
| 0.063566667  | 0.150377778 | 1.109860057 |
| 0.1817       | 0.150322222 | 1.109817319 |
| 0.0217       | 0.150277778 | 1.10978313  |
| 0.093033333  | 0.150266667 | 1.109774583 |
| 0.186966667  | 0.150211111 | 1.109731848 |
| 0.164533333  | 0.150177778 | 1.109706208 |
| 0.1897       | 0.150166667 | 1.109697662 |
| 0.0264       | 0.150122222 | 1.109663477 |
| 0.048933333  | 0.149988889 | 1.109560927 |
| -0.038966667 | 0.149966667 | 1.109543836 |
| 0.244966667  | 0.149922222 | 1.109509655 |
| 0.121733333  | 0.149888889 | 1.10948402  |
| -0.008566667 | 0.149811111 | 1.109424208 |
| 0.0271       | 0.149788889 | 1.109407119 |
| 0.1228       | 0.149733333 | 1.109364399 |
| 0.1065       | 0.149733333 | 1.109364399 |
| 0.037133333  | 0.149655556 | 1.109304593 |
| -0.084366667 | 0.149533333 | 1.109210619 |
| 0.127533333  | 0.149511111 | 1.109193534 |
| 0.060233333  | 0.149411111 | 1.109116653 |
| 0.075733333  | 0.149377778 | 1.109091027 |
| 0.1701       | 0.149311111 | 1.109039778 |
| -0.075466667 | 0.149266667 | 1.109005612 |
| 0.1018       | 0.1491      | 1.108877502 |
| 0.0584       | 0.149011111 | 1.108809183 |
| -0.037666667 | 0.149       | 1.108800644 |
| 0.0477       | 0.148966667 | 1.108775025 |
| -0.130066667 | 0.148955556 | 1.108766486 |
| 0.111633333  | 0.148933333 | 1.108749407 |
| 0.143766667  | 0.148911111 | 1.108732329 |
| 0.082033333  | 0.148866667 | 1.108698173 |
| 0.036933333  | 0.148822222 | 1.108664019 |
| -0.072966667 | 0.148711111 | 1.108578637 |
| 0.024266667  | 0.148666667 | 1.108544486 |
| -0.1222      | 0.148577778 | 1.108476187 |
| 0.008833333  | 0.148555556 | 1.108459113 |

|              |             |             |
|--------------|-------------|-------------|
| 0.174533333  | 0.148544444 | 1.108450576 |
| 0.186066667  | 0.148477778 | 1.108399356 |
| 0.252333333  | 0.1484      | 1.108339602 |
| 0.102166667  | 0.148333333 | 1.108288387 |
| -0.0101      | 0.148333333 | 1.108288387 |
| 0.159766667  | 0.148288889 | 1.108254245 |
| -0.066666667 | 0.148255556 | 1.108228639 |
| 0.1381       | 0.148144444 | 1.108143291 |
| 0.0785       | 0.148133333 | 1.108134757 |
| -0.028866667 | 0.148122222 | 1.108126222 |
| 0.155366667  | 0.148088889 | 1.108100619 |
| 0.1895       | 0.147977778 | 1.108015281 |
| 0.079        | 0.147933333 | 1.107981147 |
| -0.011333333 | 0.147933333 | 1.107981147 |
| -0.2412      | 0.147922222 | 1.107972614 |
| -0.030633333 | 0.147822222 | 1.107895818 |
| -0.0585      | 0.147766667 | 1.107853155 |
| -0.046233333 | 0.147622222 | 1.107742241 |
| 0.118333333  | 0.147622222 | 1.107742241 |
| 0.176466667  | 0.147366667 | 1.107546036 |
| -0.022666667 | 0.147355556 | 1.107537506 |
| 0.093233333  | 0.147344444 | 1.107528976 |
| 0.261033333  | 0.147077778 | 1.10732428  |
| 0.188866667  | 0.147077778 | 1.10732428  |
| 0.1269       | 0.147       | 1.107264584 |
| -0.139233333 | 0.146988889 | 1.107256057 |
| -0.039833333 | 0.146955556 | 1.107230474 |
| 0.1335       | 0.146944444 | 1.107221947 |
| -0.0547      | 0.146877778 | 1.107170783 |
| 0.000166667  | 0.146822222 | 1.107128149 |
| 0.1241       | 0.146733333 | 1.107059937 |
| 0.0068       | 0.146644444 | 1.10699173  |
| 0.037666667  | 0.146511111 | 1.106889427 |
| -0.092933333 | 0.146411111 | 1.106812706 |
| -0.054866667 | 0.146377778 | 1.106787134 |
| 0.2906       | 0.146144444 | 1.106608143 |
| 0.287266667  | 0.145955556 | 1.106463266 |
| 0.022433333  | 0.145933333 | 1.106446223 |
| 0.037566667  | 0.145922222 | 1.106437702 |
| 0.088        | 0.145877778 | 1.106403617 |
| 0.0696       | 0.145822222 | 1.106361012 |
| 0.122566667  | 0.145777778 | 1.106326929 |
| -0.0105      | 0.145744444 | 1.106301368 |
| 0.030866667  | 0.145677778 | 1.106250247 |
| 0.0209       | 0.145677778 | 1.106250247 |
| 0.115566667  | 0.145666667 | 1.106241727 |
| -0.109166667 | 0.145577778 | 1.106173571 |

|              |             |             |
|--------------|-------------|-------------|
| 0.144233333  | 0.145522222 | 1.106130975 |
| -0.0269      | 0.145511111 | 1.106122456 |
| -0.006333333 | 0.145455556 | 1.106079862 |
| -0.051666667 | 0.145455556 | 1.106079862 |
| 0.147233333  | 0.145433333 | 1.106062825 |
| -0.042666667 | 0.145266667 | 1.105935055 |
| 0.1285       | 0.145188889 | 1.105875434 |
| 0.145233333  | 0.145166667 | 1.1058584   |
| 0.2625       | 0.145155556 | 1.105849883 |
| -0.043166667 | 0.145144444 | 1.105841366 |
| 0.032666667  | 0.144988889 | 1.105722137 |
| 0.113033333  | 0.144988889 | 1.105722137 |
| 0.0961       | 0.144833333 | 1.105602922 |
| 0.1494       | 0.144711111 | 1.105509261 |
| 0.139333333  | 0.1447      | 1.105500747 |
| 0.079566667  | 0.144622222 | 1.105441149 |
| 0.174966667  | 0.1446      | 1.105424122 |
| -0.0939      | 0.144422222 | 1.105287913 |
| 0.073966667  | 0.144355556 | 1.105236839 |
| 0.018933333  | 0.1443      | 1.10519428  |
| -0.061366667 | 0.1443      | 1.10519428  |
| -0.035933333 | 0.144277778 | 1.105177256 |
| 0.0322       | 0.144277778 | 1.105177256 |
| 0.169833333  | 0.144222222 | 1.105134699 |
| -0.042966667 | 0.144133333 | 1.10506661  |
| 0.067533333  | 0.143977778 | 1.104947465 |
| 0.110033333  | 0.143944444 | 1.104921935 |
| 0.078433333  | 0.143922222 | 1.104904916 |
| -0.007933333 | 0.1439      | 1.104887897 |
| 0.0216       | 0.1439      | 1.104887897 |
| 0.077533333  | 0.143866667 | 1.104862369 |
| 0.090433333  | 0.143788889 | 1.104802806 |
| 0.0569       | 0.143755556 | 1.10477728  |
| -0.137266667 | 0.143655556 | 1.104700705 |
| 0.117366667  | 0.143588889 | 1.104649658 |
| 0.278433333  | 0.143566667 | 1.104632643 |
| 0.057833333  | 0.143488889 | 1.104573093 |
| 0.049933333  | 0.143488889 | 1.104573093 |
| 0.1234       | 0.143444444 | 1.104539065 |
| 0.162133333  | 0.143433333 | 1.104530558 |
| 0.108        | 0.143422222 | 1.104522052 |
| 0.1314       | 0.143388889 | 1.104496532 |
| 0.222566667  | 0.143366667 | 1.104479519 |
| 0.107566667  | 0.143322222 | 1.104445495 |
| 0.2196       | 0.143322222 | 1.104445495 |
| -0.110733333 | 0.143211111 | 1.104360438 |
| -0.0013      | 0.1432      | 1.104351932 |

|              |             |             |
|--------------|-------------|-------------|
| -0.234       | 0.143188889 | 1.104343427 |
| 0.116233333  | 0.143088889 | 1.104266882 |
| 0.1611       | 0.143044444 | 1.104232864 |
| 0.0203       | 0.143022222 | 1.104215856 |
| 0.1758       | 0.143011111 | 1.104207351 |
| 0.0363       | 0.143       | 1.104198847 |
| 0.021066667  | 0.142866667 | 1.104096802 |
| 0.236166667  | 0.142788889 | 1.10403728  |
| -0.003633333 | 0.142633333 | 1.103918246 |
| 0.1949       | 0.142322222 | 1.103680217 |
| -0.013333333 | 0.142322222 | 1.103680217 |
| 0.0448       | 0.142255556 | 1.103629217 |
| 0.004633333  | 0.142244444 | 1.103620717 |
| 0.218333333  | 0.142233333 | 1.103612218 |
| 0.018166667  | 0.142222222 | 1.103603718 |
| 0.053533333  | 0.142188889 | 1.10357822  |
| -0.0527      | 0.142188889 | 1.10357822  |
| -0.0142      | 0.1421      | 1.103510227 |
| 0.075833333  | 0.142044444 | 1.103467734 |
| -0.0797      | 0.142033333 | 1.103459235 |
| 0.114466667  | 0.141911111 | 1.103365756 |
| 0.0697       | 0.141888889 | 1.103348761 |
| 0.079933333  | 0.141866667 | 1.103331766 |
| 0.038133333  | 0.141822222 | 1.103297777 |
| 0.096233333  | 0.141822222 | 1.103297777 |
| 0.108533333  | 0.141655556 | 1.103170326 |
| 0.135566667  | 0.141533333 | 1.103076872 |
| 0.079966667  | 0.141511111 | 1.103059881 |
| 0.169566667  | 0.141455556 | 1.103017405 |
| 0.0626       | 0.1414      | 1.10297493  |
| 0.064333333  | 0.141355556 | 1.102940952 |
| 0.115966667  | 0.141333333 | 1.102923963 |
| -0.003766667 | 0.141277778 | 1.102881492 |
| 0.065433333  | 0.141244444 | 1.102856011 |
| 0.266366667  | 0.141211111 | 1.10283053  |
| -0.0431      | 0.141155556 | 1.102788062 |
| 0.0937       | 0.1411      | 1.102745597 |
| -0.051033333 | 0.141066667 | 1.102720118 |
| 0.029933333  | 0.141066667 | 1.102720118 |
| 0.097833333  | 0.141022222 | 1.102686148 |
| 0.0342       | 0.141022222 | 1.102686148 |
| -0.080366667 | 0.140955556 | 1.102635194 |
| 0.1917       | 0.140933333 | 1.10261821  |
| 0.0597       | 0.140911111 | 1.102601226 |
| 0.0275       | 0.140888889 | 1.102584243 |
| 0.0887       | 0.140788889 | 1.10250782  |
| -0.131866667 | 0.140755556 | 1.102482347 |

|              |             |             |
|--------------|-------------|-------------|
| -0.0629      | 0.140744444 | 1.102473856 |
| 0.148333333  | 0.140655556 | 1.102405931 |
| -0.0652      | 0.1406      | 1.102363481 |
| 0.142366667  | 0.140555556 | 1.102329521 |
| 0.0347       | 0.140533333 | 1.102312542 |
| -0.1019      | 0.140333333 | 1.102159739 |
| 0.411066667  | 0.140311111 | 1.102142763 |
| 0.253666667  | 0.140222222 | 1.102074858 |
| 0.069        | 0.140211111 | 1.102066371 |
| -0.0752      | 0.139866667 | 1.101803283 |
| -0.181666667 | 0.139822222 | 1.101769341 |
| 0.212433333  | 0.139811111 | 1.101760855 |
| 0.085533333  | 0.139788889 | 1.101743885 |
| 0.099366667  | 0.139777778 | 1.1017354   |
| 0.306666667  | 0.139755556 | 1.101718429 |
| -0.0334      | 0.139666667 | 1.101650551 |
| -0.074866667 | 0.139633333 | 1.101625098 |
| -0.1527      | 0.139588889 | 1.101591161 |
| 0.4575       | 0.139544444 | 1.101557225 |
| 0.0513       | 0.139444444 | 1.101480874 |
| 0.018133333  | 0.139288889 | 1.101362116 |
| 0.186533333  | 0.139244444 | 1.101328187 |
| 0.239833333  | 0.139188889 | 1.101285778 |
| 0.023633333  | 0.139166667 | 1.101268814 |
| 0.112266667  | 0.139155556 | 1.101260333 |
| -0.010466667 | 0.139122222 | 1.101234889 |
| 0.065733333  | 0.139044444 | 1.101175521 |
| 0.046333333  | 0.139044444 | 1.101175521 |
| 0.037533333  | 0.138888889 | 1.101056795 |
| 0.112        | 0.138844444 | 1.101022876 |
| -0.0437      | 0.138744444 | 1.100946562 |
| -0.044266667 | 0.138733333 | 1.100938083 |
| 0.061833333  | 0.138666667 | 1.10088721  |
| 0.107333333  | 0.138577778 | 1.100819383 |
| -0.006333333 | 0.1385      | 1.100760038 |
| 0.201566667  | 0.138488889 | 1.10075156  |
| -0.132933333 | 0.138466667 | 1.100734605 |
| -0.026733333 | 0.138444444 | 1.10071765  |
| 0.0682       | 0.138422222 | 1.100700696 |
| 0.0466       | 0.1384      | 1.100683741 |
| -0.1759      | 0.138388889 | 1.100675264 |
| 0.1772       | 0.138233333 | 1.100556593 |
| 0.0987       | 0.138222222 | 1.100548117 |
| -0.106033333 | 0.138144444 | 1.100488786 |
| -0.008566667 | 0.138133333 | 1.100480311 |
| 0.0591       | 0.138077778 | 1.100437934 |
| 0.013766667  | 0.138011111 | 1.100387084 |

|              |             |             |
|--------------|-------------|-------------|
| -0.004       | 0.137988889 | 1.100370135 |
| -0.027366667 | 0.137966667 | 1.100353186 |
| 0.049666667  | 0.137955556 | 1.100344711 |
| 0.3615       | 0.137866667 | 1.100276917 |
| 0.127733333  | 0.137844444 | 1.10025997  |
| 0.159833333  | 0.137744444 | 1.100183708 |
| 0.0188       | 0.137688889 | 1.100141343 |
| -0.0131      | 0.137677778 | 1.10013287  |
| 0.1875       | 0.137577778 | 1.100056617 |
| 0.072866667  | 0.137544444 | 1.100031201 |
| 0.1045       | 0.1375      | 1.099997313 |
| -0.0519      | 0.137488889 | 1.099988842 |
| -0.015766667 | 0.137466667 | 1.099971898 |
| 0.200766667  | 0.137444444 | 1.099954955 |
| 0.101033333  | 0.1374      | 1.09992107  |
| 0.0015       | 0.137322222 | 1.099861773 |
| 0.0432       | 0.137311111 | 1.099853302 |
| 0.15         | 0.137211111 | 1.099777069 |
| 0.134733333  | 0.137177778 | 1.099751659 |
| 0.063433333  | 0.137022222 | 1.099633087 |
| -0.121966667 | 0.137011111 | 1.099624618 |
| 0.106866667  | 0.136766667 | 1.099438318 |
| -0.094733333 | 0.136755556 | 1.099429851 |
| -0.047833333 | 0.1367      | 1.099387514 |
| -0.014366667 | 0.1367      | 1.099387514 |
| -0.0263      | 0.136677778 | 1.09937058  |
| 0.131133333  | 0.136622222 | 1.099328246 |
| 0.1043       | 0.136588889 | 1.099302847 |
| 0.142833333  | 0.136588889 | 1.099302847 |
| 0.007033333  | 0.136466667 | 1.09920972  |
| 0.073333333  | 0.136244444 | 1.099040419 |
| 0.157633333  | 0.136233333 | 1.099031954 |
| 0.073033333  | 0.136177778 | 1.098989634 |
| 0.031666667  | 0.1361      | 1.098930387 |
| -0.073233333 | 0.136066667 | 1.098904997 |
| 0.111466667  | 0.136055556 | 1.098896533 |
| 0.076        | 0.136011111 | 1.098862681 |
| 0.029733333  | 0.135966667 | 1.098828829 |
| 0.023366667  | 0.135922222 | 1.098794978 |
| 0.1134       | 0.135744444 | 1.098659586 |
| -0.078966667 | 0.135722222 | 1.098642664 |
| -0.066366667 | 0.1357      | 1.098625741 |
| 0.060266667  | 0.135677778 | 1.098608819 |
| 0.011333333  | 0.135666667 | 1.098600358 |
| 0.278566667  | 0.135644444 | 1.098583436 |
| 0.0365       | 0.135566667 | 1.098524211 |
| 0.284566667  | 0.135133333 | 1.098194304 |

|              |             |             |
|--------------|-------------|-------------|
| 0.08666667   | 0.1351      | 1.09816893  |
| -0.17456667  | 0.135077778 | 1.098152015 |
| 0.30766667   | 0.135033333 | 1.098118185 |
| -0.1114      | 0.135011111 | 1.098101271 |
| 0.222        | 0.135011111 | 1.098101271 |
| 0.00396667   | 0.134877778 | 1.09799979  |
| 0.082033333  | 0.134844444 | 1.097974421 |
| 0.11146667   | 0.134777778 | 1.097923685 |
| 0.0289       | 0.134722222 | 1.097881406 |
| 0.038633333  | 0.134722222 | 1.097881406 |
| 0.08366667   | 0.134588889 | 1.097779945 |
| 0.0805       | 0.134366667 | 1.097610864 |
| -0.120233333 | 0.134322222 | 1.097577051 |
| 0.0481       | 0.134155556 | 1.097450261 |
| -0.04516667  | 0.134111111 | 1.097416453 |
| -0.019233333 | 0.134       | 1.097331938 |
| 0.19286667   | 0.133966667 | 1.097306584 |
| 0.08         | 0.133855556 | 1.097222077 |
| 0.147433333  | 0.1338      | 1.097179826 |
| 0.123533333  | 0.133788889 | 1.097171376 |
| -0.0765      | 0.133777778 | 1.097162926 |
| -0.023733333 | 0.133733333 | 1.097129126 |
| 0.1184       | 0.133644444 | 1.097061531 |
| 0.2187       | 0.1335      | 1.096951697 |
| -0.00016667  | 0.133455556 | 1.096917904 |
| 0.1572       | 0.1333      | 1.096799638 |
| 0.11696667   | 0.133211111 | 1.096732063 |
| 0.22576667   | 0.133144444 | 1.096681384 |
| -0.116233333 | 0.133144444 | 1.096681384 |
| 0.04596667   | 0.133144444 | 1.096681384 |
| -0.104033333 | 0.133111111 | 1.096656046 |
| 0.08676667   | 0.133055556 | 1.096613816 |
| 0.168533333  | 0.133       | 1.096571589 |
| -0.06276667  | 0.132988889 | 1.096563143 |
| -0.0981      | 0.132966667 | 1.096546253 |
| -0.153033333 | 0.132755556 | 1.096385806 |
| 0.193633333  | 0.132722222 | 1.096360474 |
| 0.00776667   | 0.132644444 | 1.096301369 |
| -0.00296667  | 0.132566667 | 1.096242268 |
| 0.0069       | 0.1325      | 1.096191612 |
| 0.275233333  | 0.132477778 | 1.096174727 |
| 0.01516667   | 0.132355556 | 1.096081865 |
| -0.0064      | 0.132333333 | 1.096064982 |
| 0.03626667   | 0.132211111 | 1.095972129 |
| -0.11906667  | 0.1322      | 1.095963689 |
| -0.07706667  | 0.132122222 | 1.095904605 |
| 0.11676667   | 0.132111111 | 1.095896165 |



|              |             |             |
|--------------|-------------|-------------|
| -0.018       | 0.132033333 | 1.095837085 |
| 0.074766667  | 0.131977778 | 1.095794887 |
| 0.003        | 0.131722222 | 1.095600798 |
| 0.294166667  | 0.131588889 | 1.095499548 |
| 0.237433333  | 0.131566667 | 1.095482674 |
| -0.088633333 | 0.131511111 | 1.095440489 |
| 0.1051       | 0.131311111 | 1.09528864  |
| -0.139033333 | 0.131222222 | 1.095221158 |
| 0.046766667  | 0.131077778 | 1.095111508 |
| 0.0459       | 0.131077778 | 1.095111508 |
| -0.1063      | 0.130877778 | 1.094959704 |
| -0.0783      | 0.130866667 | 1.094951271 |
| 0.111366667  | 0.130844444 | 1.094934405 |
| 0.020133333  | 0.130833333 | 1.094925973 |
| 0.1201       | 0.130811111 | 1.094909107 |
| 0.063633333  | 0.130788889 | 1.094892242 |
| -0.035566667 | 0.130777778 | 1.09488381  |
| 0.2207       | 0.130777778 | 1.09488381  |
| 0.1058       | 0.130755556 | 1.094866945 |
| 0.007466667  | 0.130733333 | 1.094850081 |
| 0.123866667  | 0.1306      | 1.0947489   |
| -0.035233333 | 0.130544444 | 1.094706744 |
| -0.0672      | 0.130533333 | 1.094698313 |
| 0.084466667  | 0.130388889 | 1.094588716 |
| 0.0953       | 0.130366667 | 1.094571856 |
| 0.141466667  | 0.130211111 | 1.094453842 |
| 0.026        | 0.130211111 | 1.094453842 |
| 0.0612       | 0.130177778 | 1.094428555 |
| 0.1097       | 0.1301      | 1.094369555 |
| 0.172733333  | 0.130022222 | 1.094310557 |
| 0.3241       | 0.13        | 1.094293701 |
| 0.050133333  | 0.129922222 | 1.094234708 |
| 0.184066667  | 0.1299      | 1.094217853 |
| 0.1149       | 0.129655556 | 1.094032469 |
| -0.1381      | 0.129466667 | 1.093889239 |
| 0.025433333  | 0.1294      | 1.093838692 |
| 0.108866667  | 0.129366667 | 1.093813419 |
| 0.106        | 0.129322222 | 1.093779723 |
| -0.017966667 | 0.129055556 | 1.093577568 |
| -0.0012      | 0.128955556 | 1.09350177  |
| 0.0175       | 0.128877778 | 1.093442819 |
| -0.1405      | 0.1288      | 1.093383872 |
| 0.184433333  | 0.128755556 | 1.093350189 |
| 0.0499       | 0.128722222 | 1.093324927 |
| 0.1646       | 0.128711111 | 1.093316507 |
| 0.210533333  | 0.128666667 | 1.093282826 |
| 0.173466667  | 0.128622222 | 1.093249147 |

|              |             |             |
|--------------|-------------|-------------|
| 0.062833333  | 0.128611111 | 1.093240727 |
| 0.097033333  | 0.128588889 | 1.093223887 |
| 0.134833333  | 0.128522222 | 1.093173371 |
| 0.0644       | 0.128344444 | 1.093038672 |
| 0.011        | 0.128333333 | 1.093030254 |
| 0.049166667  | 0.128288889 | 1.092996582 |
| 0.030133333  | 0.128277778 | 1.092988164 |
| -0.009866667 | 0.128266667 | 1.092979746 |
| -0.014166667 | 0.128266667 | 1.092979746 |
| 0.2919       | 0.128244444 | 1.092962911 |
| -0.0778      | 0.128177778 | 1.092912406 |
| 0.175366667  | 0.128155556 | 1.092895572 |
| 0.0799       | 0.128133333 | 1.092878738 |
| 0.1682       | 0.128111111 | 1.092861904 |
| -0.0549      | 0.128111111 | 1.092861904 |
| -0.434666667 | 0.128044444 | 1.092811404 |
| 0.2275       | 0.127977778 | 1.092760907 |
| 0.072633333  | 0.127966667 | 1.092752491 |
| 0.2116       | 0.127833333 | 1.092651504 |
| 0.0733       | 0.127788889 | 1.092617843 |
| -0.0207      | 0.127766667 | 1.092601014 |
| 0.099233333  | 0.1277      | 1.092550526 |
| 0.137333333  | 0.127644444 | 1.092508455 |
| -0.0008      | 0.127644444 | 1.092508455 |
| 0.103266667  | 0.127577778 | 1.092457971 |
| 0.017266667  | 0.127488889 | 1.092390664 |
| 0.443066667  | 0.1273      | 1.092247649 |
| 0.143133333  | 0.127244444 | 1.092205589 |
| 0.144666667  | 0.127166667 | 1.092146708 |
| 0.145733333  | 0.127111111 | 1.092104652 |
| 0.186366667  | 0.127033333 | 1.092045777 |
| 0.212133333  | 0.127011111 | 1.092028956 |
| 0.284        | 0.126933333 | 1.091970085 |
| -0.0061      | 0.126922222 | 1.091961675 |
| -0.020733333 | 0.1269      | 1.091944855 |
| 0.3204       | 0.126877778 | 1.091928036 |
| -0.025433333 | 0.126866667 | 1.091919626 |
| 0.066333333  | 0.126844444 | 1.091902807 |
| -0.105166667 | 0.126777778 | 1.091852352 |
| 0.1337       | 0.126722222 | 1.091810307 |
| 0.186966667  | 0.126677778 | 1.091776673 |
| -0.047433333 | 0.126666667 | 1.091768265 |
| -0.008566667 | 0.126655556 | 1.091759856 |
| 0.286966667  | 0.126633333 | 1.09174304  |
| 0.237133333  | 0.126522222 | 1.091658961 |
| 0.046833333  | 0.126422222 | 1.091583295 |
| -0.034433333 | 0.126288889 | 1.091482416 |

|              |             |             |
|--------------|-------------|-------------|
| 0.015333333  | 0.126233333 | 1.091440386 |
| 0.0477       | 0.126133333 | 1.091364736 |
| -0.0903      | 0.126077778 | 1.09132271  |
| 0.1408       | 0.126077778 | 1.09132271  |
| 0.111633333  | 0.126044444 | 1.091297496 |
| -0.056966667 | 0.125988889 | 1.091255473 |
| 0.099466667  | 0.125977778 | 1.091247068 |
| 0.134166667  | 0.125933333 | 1.091213451 |
| -0.003333333 | 0.125877778 | 1.091171431 |
| 0.016766667  | 0.125855556 | 1.091154624 |
| 0.0374       | 0.125811111 | 1.09112101  |
| 0.1218       | 0.1257      | 1.091036979 |
| -0.041966667 | 0.125688889 | 1.091028576 |
| 0.085066667  | 0.125677778 | 1.091020173 |
| 0.183433333  | 0.1256      | 1.090961356 |
| -0.1186      | 0.125577778 | 1.090944552 |
| 0.296033333  | 0.125555556 | 1.090927748 |
| -0.054033333 | 0.1255      | 1.090885739 |
| -0.096233333 | 0.125466667 | 1.090860535 |
| 0.054433333  | 0.125366667 | 1.090784925 |
| 0.0028       | 0.125288889 | 1.090726121 |
| -0.071133333 | 0.125288889 | 1.090726121 |
| -0.001533333 | 0.125233333 | 1.090684119 |
| 0.1603       | 0.125188889 | 1.09065052  |
| 0.189633333  | 0.125177778 | 1.09064212  |
| -0.0934      | 0.125133333 | 1.090608522 |
| -0.0424      | 0.125122222 | 1.090600122 |
| -0.0338      | 0.125111111 | 1.090591723 |
| 0.0994       | 0.1251      | 1.090583324 |
| 0.0753       | 0.125077778 | 1.090566525 |
| -0.095833333 | 0.125033333 | 1.090532929 |
| -0.004       | 0.124911111 | 1.090440545 |
| -0.014533333 | 0.1249      | 1.090432147 |
| 0.150433333  | 0.1249      | 1.090432147 |
| 0.156633333  | 0.1249      | 1.090432147 |
| 0.061833333  | 0.124877778 | 1.090415351 |
| 0.021133333  | 0.124866667 | 1.090406953 |
| 0.0276       | 0.124855556 | 1.090398555 |
| 0.201        | 0.124833333 | 1.09038176  |
| 0.107966667  | 0.124766667 | 1.090331374 |
| 0.067033333  | 0.124733333 | 1.090306183 |
| 0.0481       | 0.1247      | 1.090280992 |
| -0.0095      | 0.124677778 | 1.090264198 |
| 0.165966667  | 0.124666667 | 1.090255801 |
| -0.214533333 | 0.124622222 | 1.090222214 |
| 0.1029       | 0.124611111 | 1.090213818 |
| 0.110233333  | 0.1245      | 1.090129857 |

|              |             |             |
|--------------|-------------|-------------|
| -0.0918      | 0.1244      | 1.090054298 |
| -0.0161      | 0.124355556 | 1.090020717 |
| 0.018333333  | 0.124322222 | 1.089995533 |
| 0.0834       | 0.1243      | 1.089978743 |
| 0.0448       | 0.1243      | 1.089978743 |
| -0.1405      | 0.124277778 | 1.089961954 |
| 0.3091       | 0.124222222 | 1.089919983 |
| 0.068166667  | 0.124211111 | 1.089911588 |
| 0.0582       | 0.124211111 | 1.089911588 |
| 0.1708       | 0.124133333 | 1.089852831 |
| 0.090833333  | 0.124122222 | 1.089844438 |
| -0.1383      | 0.124088889 | 1.089819257 |
| -0.180533333 | 0.124077778 | 1.089810864 |
| -0.040633333 | 0.124066667 | 1.089802471 |
| 0.1666       | 0.124044444 | 1.089785684 |
| 0.043566667  | 0.124022222 | 1.089768898 |
| 0.149333333  | 0.123988889 | 1.089743719 |
| 0.032766667  | 0.123966667 | 1.089726934 |
| 0.0773       | 0.123955556 | 1.089718541 |
| 0.1051       | 0.123844444 | 1.089634618 |
| 0.058633333  | 0.123844444 | 1.089634618 |
| 0.144866667  | 0.123822222 | 1.089617835 |
| 0.038533333  | 0.123788889 | 1.089592659 |
| 0.0569       | 0.123744444 | 1.089559093 |
| 0.045466667  | 0.1237      | 1.089525528 |
| 0.044733333  | 0.123677778 | 1.089508746 |
| 0.0577       | 0.123644444 | 1.089483573 |
| 0.0795       | 0.123622222 | 1.089466792 |
| -0.0933      | 0.123622222 | 1.089466792 |
| 0.1956       | 0.123588889 | 1.08944162  |
| 0.068433333  | 0.123555556 | 1.089416449 |
| -0.063866667 | 0.123466667 | 1.089349329 |
| -0.1444      | 0.123411111 | 1.089307381 |
| 0.041833333  | 0.123411111 | 1.089307381 |
| 0.130366667  | 0.123333333 | 1.089248656 |
| 0.1523       | 0.123322222 | 1.089240267 |
| -0.052       | 0.123222222 | 1.089164769 |
| 0.098133333  | 0.123155556 | 1.08911444  |
| 0.0063       | 0.123044444 | 1.089030564 |
| -0.015333333 | 0.123       | 1.088997015 |
| 0.0572       | 0.122966667 | 1.088971854 |
| 0.0347       | 0.122955556 | 1.088963468 |
| 0.080166667  | 0.122955556 | 1.088963468 |
| -0.007233333 | 0.122888889 | 1.088913148 |
| 0.126666667  | 0.122877778 | 1.088904762 |
| 0.085666667  | 0.122844444 | 1.088879603 |
| -0.085033333 | 0.122822222 | 1.088862831 |

|              |             |             |
|--------------|-------------|-------------|
| -0.024333333 | 0.122788889 | 1.088837673 |
| 0.052966667  | 0.122744444 | 1.08880413  |
| 0.0482       | 0.122733333 | 1.088795745 |
| 0.244066667  | 0.122688889 | 1.088762203 |
| -0.016466667 | 0.122577778 | 1.088678354 |
| 0.1669       | 0.122533333 | 1.088644816 |
| -0.066533333 | 0.122511111 | 1.088628047 |
| 0.049766667  | 0.1225      | 1.088619663 |
| -0.115833333 | 0.122488889 | 1.088611279 |
| -0.014266667 | 0.122455556 | 1.088586127 |
| 0.008066667  | 0.122455556 | 1.088586127 |
| -0.033266667 | 0.1224      | 1.088544208 |
| 0.0537       | 0.122244444 | 1.088426845 |
| 0.082533333  | 0.122244444 | 1.088426845 |
| 0.139033333  | 0.122133333 | 1.088343021 |
| 0.247233333  | 0.122122222 | 1.088334639 |
| 0.105466667  | 0.122055556 | 1.088284349 |
| 0.148766667  | 0.122055556 | 1.088284349 |
| 0.097766667  | 0.121966667 | 1.088217298 |
| -0.072533333 | 0.121933333 | 1.088192155 |
| -0.04        | 0.121855556 | 1.088133491 |
| -0.03        | 0.121844444 | 1.088125111 |
| 0.112733333  | 0.121811111 | 1.08809997  |
| 0.212466667  | 0.1218      | 1.08809159  |
| -0.176633333 | 0.1218      | 1.08809159  |
| -0.028466667 | 0.121588889 | 1.08793238  |
| -0.059766667 | 0.121533333 | 1.087890486 |
| -0.036733333 | 0.121344444 | 1.08774806  |
| -0.120266667 | 0.121288889 | 1.087706174 |
| 0.023733333  | 0.121277778 | 1.087697797 |
| 0.147966667  | 0.121211111 | 1.087647536 |
| -0.0056      | 0.1212      | 1.087639159 |
| -0.109466667 | 0.121188889 | 1.087630783 |
| -0.0912      | 0.121177778 | 1.087622406 |
| 0.030066667  | 0.121177778 | 1.087622406 |
| 0.085833333  | 0.121122222 | 1.087580525 |
| -0.087466667 | 0.121111111 | 1.087572148 |
| -0.157433333 | 0.121111111 | 1.087572148 |
| -0.009066667 | 0.121033333 | 1.087513517 |
| 0.1935       | 0.120977778 | 1.08747164  |
| -0.114166667 | 0.120977778 | 1.08747164  |
| 0.100533333  | 0.120833333 | 1.087362767 |
| 0.2233       | 0.120822222 | 1.087354392 |
| 0.2144       | 0.120822222 | 1.087354392 |
| -0.0088      | 0.1207      | 1.087262278 |
| -0.179966667 | 0.120655556 | 1.087228783 |
| 0.190866667  | 0.120588889 | 1.087178544 |

|              |             |             |
|--------------|-------------|-------------|
| 0.0562       | 0.120566667 | 1.087161798 |
| 0.024633333  | 0.120544444 | 1.087145052 |
| -0.051633333 | 0.120544444 | 1.087145052 |
| -0.0074      | 0.120344444 | 1.086994352 |
| 0.114633333  | 0.120311111 | 1.086969238 |
| 0.070933333  | 0.120222222 | 1.086902268 |
| 0.155733333  | 0.120222222 | 1.086902268 |
| 0.020033333  | 0.120155556 | 1.086852044 |
| 0.029566667  | 0.120077778 | 1.086793452 |
| 0.083133333  | 0.120033333 | 1.086759972 |
| -0.045466667 | 0.120011111 | 1.086743232 |
| 0.0554       | 0.119888889 | 1.086651169 |
| -0.003866667 | 0.119866667 | 1.086634432 |
| 0.092566667  | 0.119844444 | 1.086617694 |
| -0.056833333 | 0.119755556 | 1.086550746 |
| -0.032066667 | 0.119744444 | 1.086542378 |
| 0.084366667  | 0.119722222 | 1.086525642 |
| 0.228733333  | 0.119711111 | 1.086517274 |
| -0.0045      | 0.119677778 | 1.08649217  |
| 0.2535       | 0.119544444 | 1.086391762 |
| 0.225233333  | 0.119533333 | 1.086383395 |
| 0.198266667  | 0.119422222 | 1.086299729 |
| 0.4828       | 0.119355556 | 1.086249532 |
| 0.0378       | 0.119355556 | 1.086249532 |
| 0.094366667  | 0.1193      | 1.086207703 |
| 0.1111       | 0.119266667 | 1.086182607 |
| 0.0434       | 0.119244444 | 1.086165876 |
| -0.0164      | 0.119155556 | 1.086098956 |
| 0.0396       | 0.119088889 | 1.086048769 |
| -0.0668      | 0.119033333 | 1.086006948 |
| 0.138233333  | 0.119033333 | 1.086006948 |
| 0.041866667  | 0.118955556 | 1.085948401 |
| -0.005333333 | 0.118944444 | 1.085940038 |
| 0.065        | 0.118933333 | 1.085931674 |
| 0.228866667  | 0.118911111 | 1.085914948 |
| 0.045733333  | 0.118866667 | 1.085881495 |
| 0.064733333  | 0.118822222 | 1.085848043 |
| 0.0091       | 0.118777778 | 1.085814592 |
| 0.1162       | 0.118744444 | 1.085789505 |
| 0.059366667  | 0.118677778 | 1.085739332 |
| -0.0086      | 0.118644444 | 1.085714247 |
| -0.0609      | 0.118544444 | 1.085638993 |
| 0.047233333  | 0.118488889 | 1.085597188 |
| 0.092966667  | 0.118344444 | 1.085488502 |
| -0.0276      | 0.118322222 | 1.085471782 |
| -0.031033333 | 0.118277778 | 1.085438343 |
| 0.2183       | 0.118222222 | 1.085396546 |

|              |             |             |
|--------------|-------------|-------------|
| 0.1879       | 0.118188889 | 1.085371468 |
| 0.026833333  | 0.118177778 | 1.085363109 |
| 0.131866667  | 0.118155556 | 1.085346391 |
| 0.031866667  | 0.118111111 | 1.085312956 |
| 0.112333333  | 0.117933333 | 1.085179225 |
| 0.0664       | 0.117855556 | 1.085120723 |
| 0.1088       | 0.117844444 | 1.085112366 |
| 0.0077       | 0.117622222 | 1.084945236 |
| 0.138733333  | 0.117622222 | 1.084945236 |
| 0.064633333  | 0.117611111 | 1.08493688  |
| 0.171566667  | 0.117577778 | 1.084911813 |
| 0.045233333  | 0.117533333 | 1.084878391 |
| 0.070866667  | 0.117511111 | 1.08486168  |
| -0.0464      | 0.117477778 | 1.084836615 |
| -0.043466667 | 0.117477778 | 1.084836615 |
| -0.041833333 | 0.117444444 | 1.08481155  |
| 0.207633333  | 0.1174      | 1.084778132 |
| 0.013        | 0.117388889 | 1.084769777 |
| -0.006633333 | 0.117244444 | 1.084661174 |
| -0.025766667 | 0.117188889 | 1.084619406 |
| -0.099666667 | 0.117011111 | 1.084485761 |
| 0.054733333  | 0.116988889 | 1.084469057 |
| 0.2486       | 0.116966667 | 1.084452352 |
| 0.053533333  | 0.116844444 | 1.084360484 |
| 0.073433333  | 0.116755556 | 1.084293675 |
| -0.037833333 | 0.116744444 | 1.084285324 |
| 0.073733333  | 0.116622222 | 1.08419347  |
| 0.203133333  | 0.1166      | 1.08417677  |
| 0.1512       | 0.116577778 | 1.08416007  |
| 0.080866667  | 0.116566667 | 1.08415172  |
| 0.053566667  | 0.116433333 | 1.084051528 |
| -0.053133333 | 0.116377778 | 1.084009784 |
| 0.034966667  | 0.116333333 | 1.08397639  |
| 0.196633333  | 0.116311111 | 1.083959693 |
| 0.032466667  | 0.116277778 | 1.083934648 |
| 0.104933333  | 0.116277778 | 1.083934648 |
| -0.081       | 0.116222222 | 1.083892909 |
| -0.008933333 | 0.116222222 | 1.083892909 |
| -0.086566667 | 0.116211111 | 1.083884561 |
| 0.042766667  | 0.116166667 | 1.083851171 |
| -0.019966667 | 0.116133333 | 1.083826129 |
| -0.138866667 | 0.116122222 | 1.083817782 |
| 0.071733333  | 0.115988889 | 1.08371762  |
| -0.065566667 | 0.115933333 | 1.083675889 |
| -0.133166667 | 0.115911111 | 1.083659197 |
| 0.162133333  | 0.1159      | 1.083650851 |
| 0.266033333  | 0.1158      | 1.083575741 |

|              |             |             |
|--------------|-------------|-------------|
| 0.0154       | 0.115788889 | 1.083567396 |
| 0.033        | 0.115788889 | 1.083567396 |
| 0.189366667  | 0.115733333 | 1.08352567  |
| -0.100533333 | 0.115722222 | 1.083517325 |
| 0.005666667  | 0.115633333 | 1.083450569 |
| 0.120333333  | 0.115633333 | 1.083450569 |
| 0.199266667  | 0.115611111 | 1.08343388  |
| 0.021633333  | 0.1156      | 1.083425536 |
| 0.034        | 0.115566667 | 1.083400504 |
| -0.059966667 | 0.115433333 | 1.083300381 |
| -0.178433333 | 0.1154      | 1.083275352 |
| -0.3021      | 0.115388889 | 1.083267009 |
| 0.084166667  | 0.115344444 | 1.083233637 |
| 0.1859       | 0.1153      | 1.083200267 |
| -0.130333333 | 0.115233333 | 1.083150214 |
| 0.062466667  | 0.1152      | 1.083125188 |
| 0.055566667  | 0.115144444 | 1.08308348  |
| -0.0501      | 0.115088889 | 1.083041773 |
| -0.075266667 | 0.115011111 | 1.082983386 |
| 0.119133333  | 0.115011111 | 1.082983386 |
| 0.0575       | 0.114988889 | 1.082966705 |
| 0.2992       | 0.114977778 | 1.082958364 |
| -0.009633333 | 0.114877778 | 1.082883302 |
| 0.1697       | 0.114866667 | 1.082874962 |
| 0.091033333  | 0.114777778 | 1.082808245 |
| -0.073233333 | 0.114766667 | 1.082799905 |
| 0.151333333  | 0.114711111 | 1.08275821  |
| 0.0067       | 0.114655556 | 1.082716515 |
| 0.0609       | 0.1146      | 1.082674823 |
| 0.161833333  | 0.114511111 | 1.082608118 |
| -0.040833333 | 0.1145      | 1.08259978  |
| 0.053866667  | 0.114433333 | 1.082549754 |
| -0.002566667 | 0.1144      | 1.082524743 |
| 0.034766667  | 0.114233333 | 1.082399692 |
| -0.098833333 | 0.114177778 | 1.082358011 |
| -0.016133333 | 0.114122222 | 1.082316332 |
| 0.0715       | 0.114111111 | 1.082307997 |
| 0.0397       | 0.1141      | 1.082299661 |
| 0.168666667  | 0.114055556 | 1.08226632  |
| 0.0404       | 0.114044444 | 1.082257985 |
| 0.030466667  | 0.114011111 | 1.082232979 |
| 0.0151       | 0.113988889 | 1.08221631  |
| -0.023133333 | 0.113944444 | 1.082182971 |
| 0.043233333  | 0.113822222 | 1.082091294 |
| 0.077433333  | 0.1138      | 1.082074627 |
| -0.015666667 | 0.113788889 | 1.082066293 |
| -0.021966667 | 0.113733333 | 1.082024625 |



|              |             |             |
|--------------|-------------|-------------|
| 0.047333333  | 0.1137      | 1.081999626 |
| -0.032466667 | 0.113688889 | 1.081991292 |
| 0.026266667  | 0.113644444 | 1.081957961 |
| -0.006466667 | 0.113633333 | 1.081949628 |
| 0.106966667  | 0.113611111 | 1.081932962 |
| 0.1263       | 0.113577778 | 1.081907965 |
| 0.083733333  | 0.113555556 | 1.0818913   |
| -0.072333333 | 0.113433333 | 1.081799648 |
| 0.075733333  | 0.113422222 | 1.081791317 |
| -0.0483      | 0.113388889 | 1.081766322 |
| -0.555333333 | 0.113322222 | 1.081716335 |
| 0.107866667  | 0.113244444 | 1.08165802  |
| -0.1071      | 0.1132      | 1.081624698 |
| 0.013733333  | 0.1132      | 1.081624698 |
| 0.075        | 0.113133333 | 1.081574718 |
| 0.037533333  | 0.113044444 | 1.08150808  |
| 0.121266667  | 0.112988889 | 1.081466434 |
| 0.0389       | 0.112855556 | 1.08136649  |
| 0.157966667  | 0.112777778 | 1.081308194 |
| -0.0062      | 0.112766667 | 1.081299866 |
| -0.081333333 | 0.112622222 | 1.08119161  |
| 0.1194       | 0.112611111 | 1.081183283 |
| -0.194533333 | 0.1126      | 1.081174957 |
| 0.067933333  | 0.1126      | 1.081174957 |
| 0.076966667  | 0.112588889 | 1.08116663  |
| 0.0822       | 0.112533333 | 1.081124997 |
| 0.121133333  | 0.112488889 | 1.081091692 |
| 0.060666667  | 0.112322222 | 1.080966806 |
| 0.1659       | 0.112322222 | 1.080966806 |
| 0.082666667  | 0.1123      | 1.080950156 |
| 0.1292       | 0.112288889 | 1.080941831 |
| 0.163966667  | 0.112266667 | 1.080925181 |
| -4.00E-04    | 0.112211111 | 1.080883557 |
| 0.090033333  | 0.1122      | 1.080875233 |
| 0.119        | 0.112144444 | 1.080833611 |
| 0.162466667  | 0.1121      | 1.080800315 |
| 0.028433333  | 0.112077778 | 1.080783667 |
| -0.005733333 | 0.112077778 | 1.080783667 |
| 0.0274       | 0.112       | 1.080725402 |
| -0.019       | 0.111977778 | 1.080708755 |
| 0.049933333  | 0.111955556 | 1.080692109 |
| -0.073566667 | 0.111811111 | 1.080583914 |
| 0.442233333  | 0.111766667 | 1.080550626 |
| 0.034266667  | 0.111711111 | 1.080509017 |
| -0.043533333 | 0.111688889 | 1.080492373 |
| 0.060566667  | 0.111644444 | 1.080459088 |
| -0.0171      | 0.111611111 | 1.080434124 |

|              |             |             |
|--------------|-------------|-------------|
| 0.091866667  | 0.111611111 | 1.080434124 |
| -0.315666667 | 0.111611111 | 1.080434124 |
| 0.055533333  | 0.111588889 | 1.080417482 |
| 0.113666667  | 0.111566667 | 1.08040084  |
| 0.111333333  | 0.111533333 | 1.080375878 |
| 0.0193       | 0.111522222 | 1.080367557 |
| -0.071733333 | 0.111466667 | 1.080325955 |
| 0.140433333  | 0.111444444 | 1.080309315 |
| 0.0848       | 0.111411111 | 1.080284354 |
| 0.0011       | 0.111255556 | 1.080167881 |
| -0.018633333 | 0.111244444 | 1.080159562 |
| 0.132833333  | 0.111244444 | 1.080159562 |
| -0.070133333 | 0.111166667 | 1.080101331 |
| 0.051833333  | 0.111111111 | 1.080059739 |
| 0.019266667  | 0.1111      | 1.080051421 |
| 0.047333333  | 0.111077778 | 1.080034785 |
| 0.082033333  | 0.111011111 | 1.079984877 |
| 0.0977       | 0.110988889 | 1.079968242 |
| 0.135633333  | 0.110933333 | 1.079926655 |
| 0.015233333  | 0.110866667 | 1.079876753 |
| -0.029566667 | 0.110811111 | 1.07983517  |
| -0.032433333 | 0.110766667 | 1.079801905 |
| 0.271966667  | 0.110722222 | 1.07976864  |
| 0.0854       | 0.1107      | 1.079752008 |
| -0.159666667 | 0.1107      | 1.079752008 |
| 0.0178       | 0.110666667 | 1.079727061 |
| 0.256033333  | 0.110611111 | 1.079685484 |
| -0.184666667 | 0.110588889 | 1.079668853 |
| 0.109433333  | 0.110577778 | 1.079660538 |
| 0.105166667  | 0.1105      | 1.079602333 |
| -0.107966667 | 0.110444444 | 1.079560761 |
| 0.001966667  | 0.110433333 | 1.079552446 |
| 0.0251       | 0.110422222 | 1.079544132 |
| -0.046433333 | 0.110411111 | 1.079535818 |
| -0.0292      | 0.110377778 | 1.079510875 |
| 0.162433333  | 0.110377778 | 1.079510875 |
| 0.046333333  | 0.110166667 | 1.079352921 |
| 0.088766667  | 0.1101      | 1.079303045 |
| -0.162833333 | 0.110066667 | 1.079278109 |
| 0.118366667  | 0.110055556 | 1.079269796 |
| -0.4409      | 0.110033333 | 1.079253172 |
| -0.252433333 | 0.110022222 | 1.07924486  |
| 0.0006       | 0.11        | 1.079228237 |
| 0.065533333  | 0.109944444 | 1.079186678 |
| 0.132233333  | 0.109844444 | 1.079111877 |
| 0.1544       | 0.109677778 | 1.078987221 |
| 0.009733333  | 0.109566667 | 1.078904124 |

|              |             |             |
|--------------|-------------|-------------|
| 0.1571       | 0.109544444 | 1.078887506 |
| 0.1949       | 0.109544444 | 1.078887506 |
| 0.037266667  | 0.1095      | 1.078854269 |
| 0.070266667  | 0.109422222 | 1.078796108 |
| 0.0944       | 0.109388889 | 1.078771183 |
| -0.041633333 | 0.109388889 | 1.078771183 |
| -0.016933333 | 0.109355556 | 1.078746258 |
| 0.304933333  | 0.109355556 | 1.078746258 |
| 0.1974       | 0.109222222 | 1.078646566 |
| 0.0986       | 0.109188889 | 1.078621644 |
| 0.117833333  | 0.109111111 | 1.078563496 |
| 0.171266667  | 0.1091      | 1.078555189 |
| -0.000966667 | 0.109077778 | 1.078538576 |
| 0.055433333  | 0.109044444 | 1.078513656 |
| -0.1469      | 0.108966667 | 1.078455514 |
| -0.028433333 | 0.108966667 | 1.078455514 |
| 0.110533333  | 0.108944444 | 1.078438902 |
| 0.0218       | 0.1089      | 1.07840568  |
| 0.2112       | 0.108844444 | 1.078364153 |
| -0.192033333 | 0.108711111 | 1.078264496 |
| 0.116433333  | 0.108688889 | 1.078247887 |
| -6.67E-05    | 0.108666667 | 1.078231279 |
| 0.105833333  | 0.108588889 | 1.078173151 |
| 0.126466667  | 0.108577778 | 1.078164847 |
| -0.008966667 | 0.108533333 | 1.078131633 |
| 0.223866667  | 0.1085      | 1.078106724 |
| -0.1636      | 0.108366667 | 1.07800709  |
| 0.213266667  | 0.108322222 | 1.077973881 |
| 0.126066667  | 0.108322222 | 1.077973881 |
| 0.160233333  | 0.108266667 | 1.077932371 |
| 0.0584       | 0.108244444 | 1.077915767 |
| 0.100466667  | 0.108055556 | 1.077774647 |
| 0.014733333  | 0.108044444 | 1.077766347 |
| 0.003866667  | 0.108033333 | 1.077758046 |
| 0.227166667  | 0.108011111 | 1.077741445 |
| 0.021166667  | 0.108       | 1.077733145 |
| 0.1868       | 0.107988889 | 1.077724845 |
| 0.0892       | 0.107966667 | 1.077708244 |
| 0.4241       | 0.107844444 | 1.077616947 |
| 0.0762       | 0.1078      | 1.07758375  |
| -0.080833333 | 0.107777778 | 1.077567152 |
| 0.153966667  | 0.107744444 | 1.077542255 |
| -0.032233333 | 0.107688889 | 1.077500761 |
| 0.2061       | 0.107655556 | 1.077475866 |
| 0.022266667  | 0.107655556 | 1.077475866 |
| 0.070766667  | 0.107633333 | 1.07745927  |
| 0.172        | 0.107577778 | 1.07741778  |

|              |             |             |
|--------------|-------------|-------------|
| 0.1367       | 0.107555556 | 1.077401184 |
| 0.0691       | 0.107444444 | 1.07731821  |
| 0.051466667  | 0.107422222 | 1.077301615 |
| 0.1919       | 0.107366667 | 1.077260131 |
| 0.120033333  | 0.107333333 | 1.077235242 |
| 0.134566667  | 0.107266667 | 1.077185464 |
| 0.114133333  | 0.1072      | 1.077135689 |
| -0.0744      | 0.107188889 | 1.077127393 |
| 0.1742       | 0.107155556 | 1.077102506 |
| 0.045666667  | 0.107111111 | 1.077069325 |
| -0.051366667 | 0.107088889 | 1.077052735 |
| 0.2069       | 0.107044444 | 1.077019555 |
| -0.066833333 | 0.107022222 | 1.077002965 |
| -0.117066667 | 0.107       | 1.076986376 |
| 0.2548       | 0.107       | 1.076986376 |
| 0.107566667  | 0.106988889 | 1.076978082 |
| 0.263133333  | 0.106955556 | 1.076953198 |
| 0.063966667  | 0.106944444 | 1.076944904 |
| 0.0383       | 0.106911111 | 1.076920022 |
| 0.1996       | 0.106877778 | 1.07689514  |
| 0.1199       | 0.106855556 | 1.076878552 |
| -0.218466667 | 0.106822222 | 1.076853671 |
| 0.2537       | 0.106822222 | 1.076853671 |
| -0.042466667 | 0.106755556 | 1.076803911 |
| 0.1003       | 0.106655556 | 1.076729276 |
| 0.104633333  | 0.106611111 | 1.076696106 |
| -0.208066667 | 0.106588889 | 1.076679521 |
| 0.2112       | 0.106588889 | 1.076679521 |
| 0.154966667  | 0.106511111 | 1.076621478 |
| 0.048833333  | 0.106455556 | 1.07658002  |
| 0.1288       | 0.106455556 | 1.07658002  |
| -0.064033333 | 0.106433333 | 1.076563437 |
| 0.090066667  | 0.106333333 | 1.076488818 |
| 0.040666667  | 0.106288889 | 1.076455655 |
| -0.0925      | 0.106211111 | 1.076397624 |
| 0.188333333  | 0.106166667 | 1.076364464 |
| 0.019333333  | 0.106111111 | 1.076323016 |
| 0.014066667  | 0.105988889 | 1.076231836 |
| 0.1076       | 0.105955556 | 1.07620697  |
| 0.048166667  | 0.1059      | 1.076165528 |
| 0.1397       | 0.105844444 | 1.076124088 |
| -0.0508      | 0.1058      | 1.076090937 |
| 0.179733333  | 0.105766667 | 1.076066074 |
| 0.251033333  | 0.105755556 | 1.076057786 |
| 0.156166667  | 0.105666667 | 1.075991489 |
| 0.1611       | 0.105644444 | 1.075974916 |
| 0.069766667  | 0.105588889 | 1.075933483 |

|              |             |             |
|--------------|-------------|-------------|
| 0.277266667  | 0.105577778 | 1.075925196 |
| 0.236        | 0.105533333 | 1.075892051 |
| 0.027566667  | 0.1055      | 1.075867193 |
| 0.0654       | 0.1055      | 1.075867193 |
| 0.0565       | 0.105422222 | 1.075809193 |
| -0.036566667 | 0.105233333 | 1.075668349 |
| 0.1321       | 0.105233333 | 1.075668349 |
| 0.1687       | 0.105155556 | 1.07561036  |
| 0.193033333  | 0.105133333 | 1.075593792 |
| -0.060233333 | 0.105111111 | 1.075577224 |
| 0.045366667  | 0.1051      | 1.075568941 |
| 0.153        | 0.105055556 | 1.075535807 |
| 0.121766667  | 0.105055556 | 1.075535807 |
| 0.016866667  | 0.104866667 | 1.075394998 |
| -0.030233333 | 0.104855556 | 1.075386716 |
| -0.236366667 | 0.1048      | 1.075345306 |
| 0.0308       | 0.104766667 | 1.07532046  |
| 0.092633333  | 0.104666667 | 1.075245927 |
| 0.126566667  | 0.104622222 | 1.075212803 |
| 0.0936       | 0.104555556 | 1.075163119 |
| 0.093566667  | 0.104544444 | 1.075154838 |
| 0.012133333  | 0.104544444 | 1.075154838 |
| -0.0763      | 0.104522222 | 1.075138278 |
| -0.012333333 | 0.104444444 | 1.075080317 |
| 0.040833333  | 0.104388889 | 1.075038918 |
| -0.084       | 0.104355556 | 1.07501408  |
| 0.028966667  | 0.104344444 | 1.075005801 |
| 0.1948       | 0.104322222 | 1.074989242 |
| -0.0321      | 0.104255556 | 1.074939568 |
| 0.0596       | 0.104222222 | 1.074914732 |
| -0.067       | 0.104177778 | 1.074881618 |
| -0.030933333 | 0.104166667 | 1.07487334  |
| 0.0046       | 0.104111111 | 1.074831949 |
| -0.251333333 | 0.104077778 | 1.074807116 |
| 0.115933333  | 0.104044444 | 1.074782283 |
| 0.1009       | 0.104033333 | 1.074774005 |
| 0.060966667  | 0.104       | 1.074749173 |
| -0.1267      | 0.103966667 | 1.074724341 |
| 0.217033333  | 0.103888889 | 1.074666403 |
| 0.061966667  | 0.103788889 | 1.074591915 |
| 0.056033333  | 0.103755556 | 1.074567087 |
| -0.094       | 0.103744444 | 1.074558811 |
| -0.084433333 | 0.103677778 | 1.074509157 |
| 0.101433333  | 0.103622222 | 1.074467781 |
| 0.172533333  | 0.103611111 | 1.074459505 |
| 0.1364       | 0.103522222 | 1.074393307 |
| 0.017566667  | 0.103511111 | 1.074385032 |

|              |             |             |
|--------------|-------------|-------------|
| -0.068066667 | 0.103488889 | 1.074368483 |
| -0.067733333 | 0.103411111 | 1.074310564 |
| 0.100833333  | 0.1034      | 1.07430229  |
| 0.0331       | 0.103377778 | 1.074285743 |
| 0.0503       | 0.103366667 | 1.074277469 |
| 0.019533333  | 0.103344444 | 1.074260922 |
| -0.154366667 | 0.103311111 | 1.074236101 |
| 0.249966667  | 0.103277778 | 1.074211281 |
| 0.1231       | 0.103177778 | 1.074136825 |
| -0.013133333 | 0.103155556 | 1.07412028  |
| -0.072333333 | 0.103133333 | 1.074103735 |
| -0.091533333 | 0.103122222 | 1.074095463 |
| 0.048        | 0.1031      | 1.074078919 |
| 0.146766667  | 0.103077778 | 1.074062374 |
| -0.070566667 | 0.103066667 | 1.074054102 |
| 0.098433333  | 0.103044444 | 1.074037558 |
| 0.003333333  | 0.1029      | 1.07393003  |
| 0.084566667  | 0.102877778 | 1.073913488 |
| -0.0614      | 0.102844444 | 1.073888676 |
| 0.045733333  | 0.102844444 | 1.073888676 |
| 0.143233333  | 0.102766667 | 1.073830782 |
| 0.020733333  | 0.102733333 | 1.073805972 |
| 0.1097       | 0.102688889 | 1.073772892 |
| 0.203833333  | 0.102677778 | 1.073764622 |
| 0.013533333  | 0.102644444 | 1.073739813 |
| -0.094533333 | 0.102622222 | 1.073723274 |
| -0.013       | 0.102611111 | 1.073715005 |
| 0.0674       | 0.1026      | 1.073706736 |
| -0.018733333 | 0.102544444 | 1.07366539  |
| -0.016733333 | 0.102511111 | 1.073640583 |
| 0.0929       | 0.102455556 | 1.07359924  |
| 0.277933333  | 0.102344444 | 1.073516559 |
| 0.057633333  | 0.102255556 | 1.073450418 |
| 0.1706       | 0.102188889 | 1.073400815 |
| 0.1777       | 0.102144444 | 1.073367748 |
| 0.011566667  | 0.102022222 | 1.073276818 |
| 0.031933333  | 0.101988889 | 1.073252021 |
| 0.0216       | 0.101955556 | 1.073227223 |
| 0.075833333  | 0.101944444 | 1.073218958 |
| 0.216433333  | 0.1019      | 1.073185896 |
| 0.005533333  | 0.101855556 | 1.073152836 |
| 0.0162       | 0.101844444 | 1.073144571 |
| -0.0082      | 0.101633333 | 1.072987548 |
| 0.1804       | 0.1016      | 1.072962757 |
| 0.036266667  | 0.101522222 | 1.072904913 |
| 0.1324       | 0.101511111 | 1.07289665  |
| -0.0806      | 0.1015      | 1.072888387 |

|              |             |             |
|--------------|-------------|-------------|
| 0.035233333  | 0.1015      | 1.072888387 |
| -0.339933333 | 0.101466667 | 1.072863598 |
| 0.053366667  | 0.101455556 | 1.072855336 |
| 0.165933333  | 0.101444444 | 1.072847073 |
| 0.104433333  | 0.101433333 | 1.07283881  |
| -0.011866667 | 0.101388889 | 1.07280576  |
| -0.034366667 | 0.101388889 | 1.07280576  |
| 0.0557       | 0.101344444 | 1.072772711 |
| 0.0149       | 0.101211111 | 1.072673571 |
| -0.1489      | 0.101166667 | 1.072640526 |
| 0.009166667  | 0.101155556 | 1.072632265 |
| 0.184966667  | 0.101111111 | 1.072599221 |
| 0.089933333  | 0.101088889 | 1.0725827   |
| 0.026033333  | 0.101088889 | 1.0725827   |
| 0.1745       | 0.101044444 | 1.072549658 |
| 0.163233333  | 0.101022222 | 1.072533137 |
| -0.0141      | 0.101022222 | 1.072533137 |
| -0.0179      | 0.100911111 | 1.072450538 |
| -0.009533333 | 0.1009      | 1.072442278 |
| 0.2737       | 0.100888889 | 1.072434019 |
| 0.034833333  | 0.100888889 | 1.072434019 |
| 0.338366667  | 0.100855556 | 1.07240924  |
| -0.159433333 | 0.100855556 | 1.07240924  |
| 0.0458       | 0.100811111 | 1.072376204 |
| 0.176633333  | 0.1008      | 1.072367945 |
| -0.0565      | 0.100733333 | 1.072318392 |
| 0.023533333  | 0.100666667 | 1.072268841 |
| 0.162366667  | 0.100666667 | 1.072268841 |
| 0.1707       | 0.100566667 | 1.07219452  |
| 0.0228       | 0.100555556 | 1.072186262 |
| 0.137866667  | 0.100433333 | 1.072095433 |
| -0.080566667 | 0.100322222 | 1.072012867 |
| -0.160666667 | 0.100322222 | 1.072012867 |
| 0.1916       | 0.100288889 | 1.071988099 |
| 0.076366667  | 0.100266667 | 1.071971587 |
| 0.259166667  | 0.100255556 | 1.071963331 |
| 0.0556       | 0.100177778 | 1.071905541 |
| -0.030766667 | 0.100077778 | 1.071831245 |
| -0.082833333 | 0.100033333 | 1.071798226 |
| 0.15         | 0.100033333 | 1.071798226 |
| 0.079866667  | 0.100011111 | 1.071781717 |
| 0.077666667  | 0.099955556 | 1.071740445 |
| 0.035233333  | 0.099933333 | 1.071723937 |
| -0.069366667 | 0.099888889 | 1.071690922 |
| 0.106666667  | 0.099811111 | 1.071633147 |
| 0.033033333  | 0.099744444 | 1.071583628 |
| 0.0173       | 0.099566667 | 1.071451589 |

|              |             |             |
|--------------|-------------|-------------|
| 0.149166667  | 0.099544444 | 1.071435085 |
| -0.184166667 | 0.099488889 | 1.071393827 |
| -0.0203      | 0.099444444 | 1.071360822 |
| -0.021433333 | 0.099388889 | 1.071319566 |
| 0.081966667  | 0.099377778 | 1.071311315 |
| -0.0848      | 0.099311111 | 1.071261811 |
| 0.113266667  | 0.099211111 | 1.07118756  |
| -0.050033333 | 0.0992      | 1.07117931  |
| 0.040433333  | 0.099166667 | 1.071154561 |
| 0.0438       | 0.099133333 | 1.071129812 |
| -0.1319      | 0.099066667 | 1.071080316 |
| 0.110366667  | 0.099033333 | 1.07105557  |
| 0.0382       | 0.099       | 1.071030823 |
| 0.0527       | 0.099       | 1.071030823 |
| 0.1357       | 0.098944444 | 1.070989581 |
| -0.0652      | 0.098933333 | 1.070981332 |
| 0.063866667  | 0.098922222 | 1.070973084 |
| 0.077933333  | 0.098911111 | 1.070964836 |
| -0.0343      | 0.098866667 | 1.070931843 |
| 0.093333333  | 0.098811111 | 1.070890605 |
| -0.027333333 | 0.098811111 | 1.070890605 |
| 0.068666667  | 0.0988      | 1.070882357 |
| 0.012733333  | 0.098777778 | 1.070865862 |
| -0.0067      | 0.098722222 | 1.070824626 |
| 0.1813       | 0.0987      | 1.070808132 |
| 0.1517       | 0.098644444 | 1.070766898 |
| 0.1194       | 0.098622222 | 1.070750404 |
| 0.1243       | 0.098611111 | 1.070742158 |
| 0.041        | 0.098611111 | 1.070742158 |
| 0.0129       | 0.098566667 | 1.070709173 |
| -0.2092      | 0.098533333 | 1.070684434 |
| 0.036866667  | 0.098455556 | 1.070626714 |
| 0.184433333  | 0.098455556 | 1.070626714 |
| 0.034033333  | 0.0984      | 1.070585487 |
| 0.022066667  | 0.098388889 | 1.070577241 |
| 0.0282       | 0.098388889 | 1.070577241 |
| 0.267933333  | 0.098388889 | 1.070577241 |
| 0.014066667  | 0.0983      | 1.070511282 |
| 0.062133333  | 0.098233333 | 1.070461815 |
| 0.1134       | 0.0982      | 1.070437082 |
| 0.149433333  | 0.098166667 | 1.07041235  |
| -0.106833333 | 0.098133333 | 1.070387619 |
| -0.028966667 | 0.098088889 | 1.070354644 |
| 0.006833333  | 0.098088889 | 1.070354644 |
| -0.0765      | 0.098066667 | 1.070338157 |
| 0.108966667  | 0.098033333 | 1.070313428 |
| -0.0263      | 0.098022222 | 1.070305185 |



|              |             |             |
|--------------|-------------|-------------|
| 0.030166667  | 0.098       | 1.070288698 |
| -0.0038      | 0.097944444 | 1.070247484 |
| 0.0108       | 0.097922222 | 1.070230999 |
| 0.0153       | 0.097888889 | 1.070206272 |
| -0.0922      | 0.097844444 | 1.070173303 |
| -0.043666667 | 0.0978      | 1.070140335 |
| 0.049433333  | 0.097666667 | 1.070041438 |
| 0.082666667  | 0.0976      | 1.069991993 |
| 0.0595       | 0.097477778 | 1.069901349 |
| -0.010566667 | 0.097455556 | 1.069884869 |
| 0.135033333  | 0.097455556 | 1.069884869 |
| 0.092066667  | 0.097433333 | 1.069868389 |
| 0.018333333  | 0.097222222 | 1.069711846 |
| 0.018266667  | 0.097188889 | 1.069687131 |
| 0.093366667  | 0.097166667 | 1.069670654 |
| 0.185466667  | 0.097122222 | 1.069637702 |
| 0.227033333  | 0.097077778 | 1.06960475  |
| -0.017533333 | 0.096955556 | 1.069514139 |
| 0.103633333  | 0.096944444 | 1.069505902 |
| -0.0569      | 0.096911111 | 1.069481192 |
| 0.204433333  | 0.096811111 | 1.069407064 |
| 0.179766667  | 0.096733333 | 1.069349412 |
| 0.0246       | 0.096722222 | 1.069341176 |
| -0.0684      | 0.096677778 | 1.069308234 |
| 0.129733333  | 0.096655556 | 1.069291763 |
| 0.106733333  | 0.096633333 | 1.069275293 |
| -0.089866667 | 0.0965      | 1.069176475 |
| 0.040933333  | 0.0964      | 1.069102368 |
| 0.142633333  | 0.096377778 | 1.069085901 |
| 0.078766667  | 0.096355556 | 1.069069433 |
| 0.197866667  | 0.096333333 | 1.069052966 |
| 0.115166667  | 0.096288889 | 1.069020033 |
| 0.066433333  | 0.096288889 | 1.069020033 |
| -0.205833333 | 0.096244444 | 1.068987101 |
| 0.097266667  | 0.096233333 | 1.068978868 |
| 0.000366667  | 0.096222222 | 1.068970635 |
| 0.004733333  | 0.096211111 | 1.068962402 |
| 0.126033333  | 0.096188889 | 1.068945937 |
| 0.117633333  | 0.096122222 | 1.068896542 |
| 0.117166667  | 0.0961      | 1.068880078 |
| 0.220733333  | 0.096066667 | 1.068855382 |
| 0.034833333  | 0.096066667 | 1.068855382 |
| 0.063533333  | 0.095977778 | 1.068789528 |
| -0.029866667 | 0.095888889 | 1.068723679 |
| 0.096766667  | 0.095877778 | 1.068715448 |
| 0.0602       | 0.0958      | 1.068657834 |
| -0.2555      | 0.095722222 | 1.068600222 |

|              |             |             |
|--------------|-------------|-------------|
| 0.0126       | 0.0957      | 1.068583762 |
| -0.020233333 | 0.095677778 | 1.068567303 |
| 0.1899       | 0.095611111 | 1.068517926 |
| -0.0254      | 0.095611111 | 1.068517926 |
| -0.0649      | 0.0955      | 1.068435635 |
| 0.083966667  | 0.095488889 | 1.068427407 |
| 0.051266667  | 0.095388889 | 1.068353352 |
| -0.015133333 | 0.095355556 | 1.068328668 |
| 0.052033333  | 0.095333333 | 1.068312212 |
| 0.1648       | 0.095311111 | 1.068295757 |
| -0.084466667 | 0.095266667 | 1.068262847 |
| 0.056466667  | 0.095255556 | 1.068254619 |
| -0.003133333 | 0.095233333 | 1.068238165 |
| 0.033266667  | 0.0952      | 1.068213484 |
| 0.007766667  | 0.095055556 | 1.068106538 |
| -0.196133333 | 0.095044444 | 1.068098312 |
| 0.179733333  | 0.095044444 | 1.068098312 |
| 0.001066667  | 0.095033333 | 1.068090086 |
| 0.0603       | 0.094966667 | 1.068040731 |
| 0.0672       | 0.094688889 | 1.067835109 |
| -0.0759      | 0.094666667 | 1.067818661 |
| 0.029366667  | 0.094655556 | 1.067810437 |
| -0.0022      | 0.094611111 | 1.067777542 |
| 0.051933333  | 0.094611111 | 1.067777542 |
| -0.019266667 | 0.094455556 | 1.067662417 |
| 0.147733333  | 0.094433333 | 1.067645972 |
| 0.178033333  | 0.094388889 | 1.067613082 |
| 0.010133333  | 0.094288889 | 1.067539083 |
| -0.063633333 | 0.094277778 | 1.067530862 |
| 0.027933333  | 0.094266667 | 1.06752264  |
| 0.056666667  | 0.094211111 | 1.067481532 |
| 0.017733333  | 0.0942      | 1.067473311 |
| 0.312466667  | 0.094166667 | 1.067448647 |
| 0.038633333  | 0.094077778 | 1.067382881 |
| -0.053266667 | 0.094077778 | 1.067382881 |
| -0.0403      | 0.094077778 | 1.067382881 |
| -0.022366667 | 0.094044444 | 1.067358219 |
| -0.195633333 | 0.094033333 | 1.067349999 |
| -0.0167      | 0.094033333 | 1.067349999 |
| -0.185433333 | 0.093988889 | 1.067317118 |
| 0.078633333  | 0.093866667 | 1.067226701 |
| 0.045166667  | 0.093855556 | 1.067218481 |
| -0.139166667 | 0.093755556 | 1.06714451  |
| 0.0459       | 0.093655556 | 1.067070544 |
| 0.141633333  | 0.093622222 | 1.06704589  |
| -0.006933333 | 0.0936      | 1.067029454 |
| -0.130266667 | 0.093588889 | 1.067021236 |

|              |             |             |
|--------------|-------------|-------------|
| 0.044866667  | 0.093555556 | 1.066996583 |
| 0.0401       | 0.093533333 | 1.066980148 |
| -0.1575      | 0.093366667 | 1.066856892 |
| -0.036333333 | 0.093344444 | 1.066840459 |
| -0.0337      | 0.093255556 | 1.06677473  |
| 0.0544       | 0.093244444 | 1.066766514 |
| 0.027133333  | 0.093222222 | 1.066750083 |
| 0.176566667  | 0.093066667 | 1.066635069 |
| 0.062966667  | 0.092888889 | 1.066503639 |
| -0.005066667 | 0.092877778 | 1.066495426 |
| 0.2958       | 0.092855556 | 1.066478998 |
| 0.000533333  | 0.092755556 | 1.066405078 |
| 0.110366667  | 0.092622222 | 1.066306526 |
| -0.087433333 | 0.092577778 | 1.066273677 |
| 0.141166667  | 0.092533333 | 1.06624083  |
| -0.097766667 | 0.092511111 | 1.066224406 |
| 0.007333333  | 0.092466667 | 1.06619156  |
| -0.0574      | 0.092444444 | 1.066175137 |
| 0.1033       | 0.092377778 | 1.066125871 |
| -0.059233333 | 0.092344444 | 1.066101238 |
| -0.0417      | 0.092333333 | 1.066093027 |
| 0.0234       | 0.092277778 | 1.066051975 |
| -0.083133333 | 0.092266667 | 1.066043765 |
| 0.0127       | 0.092255556 | 1.066035554 |
| 0.096733333  | 0.092244444 | 1.066027344 |
| 0.156533333  | 0.092233333 | 1.066019134 |
| -0.143566667 | 0.092155556 | 1.065961665 |
| 0.041833333  | 0.092111111 | 1.065928827 |
| 0.207166667  | 0.092088889 | 1.065912408 |
| 0.2487       | 0.092077778 | 1.065904199 |
| 0.012733333  | 0.092055556 | 1.065887781 |
| 0.008566667  | 0.091977778 | 1.065830319 |
| 0.065433333  | 0.091944444 | 1.065805693 |
| -0.115633333 | 0.091911111 | 1.065781068 |
| 0.002466667  | 0.091755556 | 1.065666159 |
| -0.063       | 0.091744444 | 1.065657951 |
| 0.015266667  | 0.0917      | 1.065625123 |
| -0.043666667 | 0.091455556 | 1.065444583 |
| -0.0037      | 0.091455556 | 1.065444583 |
| 0.234233333  | 0.091411111 | 1.06541176  |
| 0.0452       | 0.091366667 | 1.065378939 |
| -0.036966667 | 0.091333333 | 1.065354324 |
| 0.0003       | 0.091333333 | 1.065354324 |
| 0.259533333  | 0.091322222 | 1.065346119 |
| 0.021        | 0.091277778 | 1.0653133   |
| 0.1603       | 0.091277778 | 1.0653133   |
| -0.106533333 | 0.091255556 | 1.065296891 |

|              |             |             |
|--------------|-------------|-------------|
| 0.092233333  | 0.091166667 | 1.065231257 |
| 0.326233333  | 0.091155556 | 1.065223053 |
| 0.013266667  | 0.091155556 | 1.065223053 |
| 0.1418       | 0.091133333 | 1.065206645 |
| 0.0347       | 0.091122222 | 1.065198441 |
| 0.190633333  | 0.091111111 | 1.065190237 |
| 0.053233333  | 0.091066667 | 1.065157423 |
| 0.098866667  | 0.091044444 | 1.065141016 |
| 0.4348       | 0.090988889 | 1.0651      |
| 0.076566667  | 0.090933333 | 1.065058986 |
| 0.062033333  | 0.090922222 | 1.065050783 |
| 0.3179       | 0.090922222 | 1.065050783 |
| 0.142133333  | 0.0908      | 1.064960558 |
| -0.213       | 0.090788889 | 1.064952356 |
| 0.178433333  | 0.090688889 | 1.064878542 |
| 0.191866667  | 0.090677778 | 1.064870341 |
| 0.1409       | 0.090611111 | 1.064821134 |
| 0.130933333  | 0.090544444 | 1.06477193  |
| -0.0536      | 0.090533333 | 1.06476373  |
| -0.067566667 | 0.090355556 | 1.064632531 |
| 0.1097       | 0.090311111 | 1.064599734 |
| -0.0932      | 0.0903      | 1.064591535 |
| 0.019166667  | 0.090255556 | 1.064558739 |
| 0.224066667  | 0.090166667 | 1.06449315  |
| -0.1696      | 0.090155556 | 1.064484952 |
| 0.31         | 0.090111111 | 1.06445216  |
| 0.1378       | 0.090077778 | 1.064427566 |
| -0.027066667 | 0.090055556 | 1.06441117  |
| 0.0068       | 0.089988889 | 1.064361985 |
| 0.015366667  | 0.089977778 | 1.064353788 |
| -0.106833333 | 0.0899      | 1.064296408 |
| -0.080966667 | 0.0899      | 1.064296408 |
| 0.144233333  | 0.089888889 | 1.064288212 |
| 0.225966667  | 0.089733333 | 1.064173463 |
| 0.131766667  | 0.089688889 | 1.06414068  |
| -0.0411      | 0.089688889 | 1.06414068  |
| -0.0935      | 0.089622222 | 1.064091508 |
| 0.0637       | 0.0896      | 1.064075117 |
| 0.030766667  | 0.089522222 | 1.064017753 |
| 0.077166667  | 0.089422222 | 1.063944003 |
| -0.030333333 | 0.0894      | 1.063927615 |
| -0.0398      | 0.089377778 | 1.063911228 |
| 0.156766667  | 0.089255556 | 1.063821099 |
| -0.088766667 | 0.089244444 | 1.063812906 |
| 6.00E-04     | 0.089233333 | 1.063804713 |
| 0.093633333  | 0.089211111 | 1.063788327 |
| 0.008033333  | 0.0892      | 1.063780134 |

|              |             |             |
|--------------|-------------|-------------|
| -0.209066667 | 0.0891      | 1.063706401 |
| -0.010866667 | 0.088988889 | 1.063624481 |
| -0.0484      | 0.088977778 | 1.06361629  |
| 0.033966667  | 0.088977778 | 1.06361629  |
| 0.039        | 0.088888889 | 1.063550759 |
| -0.001333333 | 0.088877778 | 1.063542568 |
| 0.070966667  | 0.088877778 | 1.063542568 |
| -0.029366667 | 0.088855556 | 1.063526186 |
| 0.0723       | 0.088811111 | 1.063493423 |
| 0.049266667  | 0.0888      | 1.063485232 |
| -0.0327      | 0.0888      | 1.063485232 |
| -0.196       | 0.088733333 | 1.06343609  |
| -0.016933333 | 0.088622222 | 1.063354191 |
| 0.257766667  | 0.088588889 | 1.063329623 |
| 0.062733333  | 0.088577778 | 1.063321433 |
| 0.1022       | 0.088488889 | 1.063255921 |
| 0.164433333  | 0.088422222 | 1.063206789 |
| -0.081733333 | 0.088188889 | 1.063034846 |
| -0.134833333 | 0.088155556 | 1.063010285 |
| 0.001533333  | 0.0881      | 1.062969351 |
| 0.158233333  | 0.088066667 | 1.062944792 |
| 0.0727       | 0.088044444 | 1.062928419 |
| 0.0046       | 0.088011111 | 1.06290386  |
| 0.145766667  | 0.087955556 | 1.062862931 |
| 0.2529       | 0.087866667 | 1.062797446 |
| 0.1068       | 0.087844444 | 1.062781076 |
| -0.014066667 | 0.087833333 | 1.062772891 |
| 0.125366667  | 0.087711111 | 1.062682859 |
| 0.162766667  | 0.087655556 | 1.062641938 |
| -0.0385      | 0.087611111 | 1.062609202 |
| -0.069166667 | 0.087544444 | 1.0625601   |
| -0.000566667 | 0.087388889 | 1.062445538 |
| -0.056066667 | 0.087355556 | 1.06242099  |
| 0.124266667  | 0.087333333 | 1.062404626 |
| 0.0559       | 0.087155556 | 1.062273718 |
| -0.112733333 | 0.087111111 | 1.062240993 |
| -0.193366667 | 0.087088889 | 1.062224631 |
| 0.1322       | 0.087033333 | 1.062183728 |
| -0.0724      | 0.086977778 | 1.062142826 |
| -0.029366667 | 0.086933333 | 1.062110105 |
| -0.008166667 | 0.086855556 | 1.062052847 |
| 0.0877       | 0.086844444 | 1.062044668 |
| -0.0975      | 0.086822222 | 1.062028309 |
| -0.0506      | 0.0868      | 1.06201195  |
| 0.101833333  | 0.086755556 | 1.061979234 |
| 0.075233333  | 0.086755556 | 1.061979234 |
| -0.077333333 | 0.086711111 | 1.061946518 |

|              |             |             |
|--------------|-------------|-------------|
| -0.017833333 | 0.086566667 | 1.0618402   |
| 0.099        | 0.0865      | 1.061791134 |
| -0.0009      | 0.086488889 | 1.061782956 |
| 0.027966667  | 0.086455556 | 1.061758424 |
| 0.060233333  | 0.086444444 | 1.061750247 |
| 0.210233333  | 0.086444444 | 1.061750247 |
| -0.0665      | 0.086433333 | 1.06174207  |
| -0.0255      | 0.086344444 | 1.061676655 |
| 0.041733333  | 0.0863      | 1.061643949 |
| -0.0235      | 0.086266667 | 1.06161942  |
| 0.0778       | 0.086255556 | 1.061611244 |
| 0.243466667  | 0.086244444 | 1.061603067 |
| -0.01        | 0.0862      | 1.061570364 |
| 0.239366667  | 0.086155556 | 1.061537661 |
| 0.0208       | 0.086066667 | 1.061472258 |
| 0.2201       | 0.086033333 | 1.061447733 |
| 0.065533333  | 0.085988889 | 1.061415034 |
| 0.0293       | 0.085866667 | 1.061325117 |
| 0.036133333  | 0.085777778 | 1.061259728 |
| -0.109433333 | 0.085766667 | 1.061251554 |
| -0.035033333 | 0.085733333 | 1.061227034 |
| -0.133966667 | 0.085711111 | 1.061210688 |
| 0.057        | 0.085555556 | 1.061096272 |
| -0.068566667 | 0.085466667 | 1.061030896 |
| 0.010933333  | 0.085455556 | 1.061022724 |
| 0.0777       | 0.085433333 | 1.061006381 |
| 0.0607       | 0.085366667 | 1.060957354 |
| -0.0589      | 0.085366667 | 1.060957354 |
| 0.0179       | 0.0853      | 1.060908328 |
| 0.050366667  | 0.085211111 | 1.060842964 |
| -0.0566      | 0.085166667 | 1.060810284 |
| -0.0259      | 0.085155556 | 1.060802114 |
| 0.017033333  | 0.085133333 | 1.060785774 |
| -0.149266667 | 0.085133333 | 1.060785774 |
| 0.195866667  | 0.085033333 | 1.060712249 |
| 0.0188       | 0.085       | 1.060687741 |
| -0.118066667 | 0.084933333 | 1.060638728 |
| 0.0596       | 0.084855556 | 1.060581549 |
| -0.158433333 | 0.084844444 | 1.060573381 |
| 0.3323       | 0.084833333 | 1.060565213 |
| -0.074266667 | 0.084744444 | 1.06049987  |
| -0.018066667 | 0.084722222 | 1.060483535 |
| 0.074733333  | 0.084655556 | 1.060434532 |
| -0.168733333 | 0.0846      | 1.060393697 |
| 0.0962       | 0.084566667 | 1.060369197 |
| -0.1461      | 0.084555556 | 1.06036103  |
| 0.2276       | 0.084544444 | 1.060352864 |

|              |             |             |
|--------------|-------------|-------------|
| -0.212066667 | 0.084533333 | 1.060344698 |
| -0.063666667 | 0.084488889 | 1.060312033 |
| 0.002433333  | 0.084455556 | 1.060287534 |
| -0.163333333 | 0.084388889 | 1.06023854  |
| 0.047066667  | 0.084266667 | 1.060148722 |
| -0.030033333 | 0.084211111 | 1.060107899 |
| 0.097233333  | 0.084211111 | 1.060107899 |
| 0.189066667  | 0.084155556 | 1.060067077 |
| 0.1616       | 0.084122222 | 1.060042584 |
| 0.014466667  | 0.084033333 | 1.059977274 |
| 0.085466667  | 0.083866667 | 1.059854827 |
| 0.071866667  | 0.083855556 | 1.059846665 |
| 0.075433333  | 0.083844444 | 1.059838502 |
| 0.023133333  | 0.083766667 | 1.059781366 |
| 0.024266667  | 0.083755556 | 1.059773204 |
| 0.179233333  | 0.083755556 | 1.059773204 |
| 0.117533333  | 0.083755556 | 1.059773204 |
| 0.021933333  | 0.083744444 | 1.059765043 |
| 0.0318       | 0.0837      | 1.059732395 |
| 0.0129       | 0.083677778 | 1.059716072 |
| 0.1712       | 0.083588889 | 1.059650782 |
| -0.032433333 | 0.083577778 | 1.059642621 |
| -0.01        | 0.083488889 | 1.059577335 |
| -0.0411      | 0.083455556 | 1.059552854 |
| 0.013833333  | 0.083455556 | 1.059552854 |
| 0.1183       | 0.083311111 | 1.059446775 |
| -0.061866667 | 0.083311111 | 1.059446775 |
| 0.172633333  | 0.083288889 | 1.059430456 |
| -0.0363      | 0.083188889 | 1.059357025 |
| 0.548333333  | 0.083177778 | 1.059348866 |
| -0.0758      | 0.0831      | 1.059291757 |
| 0.032433333  | 0.0831      | 1.059291757 |
| -0.058233333 | 0.082922222 | 1.059161232 |
| -0.104233333 | 0.082711111 | 1.059006255 |
| 0.055266667  | 0.0827      | 1.058998099 |
| -0.120533333 | 0.082677778 | 1.058981787 |
| -0.008466667 | 0.082677778 | 1.058981787 |
| 0.030466667  | 0.082666667 | 1.058973632 |
| 0.0166       | 0.082477778 | 1.058834992 |
| 0.0716       | 0.082433333 | 1.058802373 |
| 0.12         | 0.082388889 | 1.058769755 |
| 0.0097       | 0.082388889 | 1.058769755 |
| -0.032933333 | 0.082266667 | 1.058680062 |
| 0.045533333  | 0.082244444 | 1.058663755 |
| -0.0652      | 0.082222222 | 1.058647449 |
| 0.066166667  | 0.082211111 | 1.058639295 |
| 0.0785       | 0.082155556 | 1.05859853  |

|              |             |             |
|--------------|-------------|-------------|
| 0.079233333  | 0.082111111 | 1.058565919 |
| 0.040233333  | 0.082066667 | 1.058533308 |
| -0.1396      | 0.082011111 | 1.058492547 |
| 0.072766667  | 0.081977778 | 1.058468091 |
| 0.265766667  | 0.081966667 | 1.058459939 |
| 0.239533333  | 0.081922222 | 1.058427332 |
| -0.0797      | 0.0819      | 1.058411029 |
| 0.031166667  | 0.081888889 | 1.058402877 |
| 0.025233333  | 0.081622222 | 1.058207261 |
| 0.132233333  | 0.081566667 | 1.058166512 |
| 0.035566667  | 0.081533333 | 1.058142064 |
| 0.198866667  | 0.0814      | 1.058044275 |
| 0.044        | 0.0814      | 1.058044275 |
| 0.002866667  | 0.081388889 | 1.058036126 |
| 0.059666667  | 0.081366667 | 1.058019829 |
| 0.0452       | 0.081355556 | 1.058011681 |
| 0.116133333  | 0.081355556 | 1.058011681 |
| 0.060366667  | 0.081322222 | 1.057987236 |
| -0.017366667 | 0.081288889 | 1.057962792 |
| -0.051433333 | 0.081266667 | 1.057946496 |
| -0.2787      | 0.081233333 | 1.057922052 |
| 0.299566667  | 0.081166667 | 1.057873167 |
| -0.037033333 | 0.081144444 | 1.057856872 |
| 0.0431       | 0.081144444 | 1.057856872 |
| 0.027166667  | 0.0811      | 1.057824284 |
| 0.017066667  | 0.080966667 | 1.057726525 |
| -0.090166667 | 0.080911111 | 1.057685794 |
| 0.146133333  | 0.080911111 | 1.057685794 |
| 0.085566667  | 0.0809      | 1.057677648 |
| -0.024       | 0.080855556 | 1.057645066 |
| 0.020933333  | 0.080855556 | 1.057645066 |
| 0.188066667  | 0.080755556 | 1.057571758 |
| 0.098366667  | 0.080744444 | 1.057563613 |
| 0.075933333  | 0.080733333 | 1.057555468 |
| 0.202266667  | 0.080733333 | 1.057555468 |
| 0.0634       | 0.080677778 | 1.057514744 |
| -0.003666667 | 0.080644444 | 1.057490311 |
| 0.239733333  | 0.080644444 | 1.057490311 |
| 0.2073       | 0.080522222 | 1.057400726 |
| 0.052533333  | 0.080477778 | 1.057368152 |
| 0.106033333  | 0.080422222 | 1.057327435 |
| 0.022433333  | 0.080377778 | 1.057294863 |
| 0.065233333  | 0.080344444 | 1.057270434 |
| -0.104333333 | 0.080333333 | 1.057262292 |
| 0.067866667  | 0.080266667 | 1.057213437 |
| -0.066633333 | 0.080177778 | 1.057148301 |
| 0.128533333  | 0.080166667 | 1.057140159 |



|              |             |             |
|--------------|-------------|-------------|
| 0.0436       | 0.080033333 | 1.057042463 |
| 0.0145       | 0.080033333 | 1.057042463 |
| 0.007633333  | 0.080022222 | 1.057034322 |
| 0.0593       | 0.079988889 | 1.0570099   |
| -0.0344      | 0.079922222 | 1.056961057 |
| 0.059233333  | 0.079877778 | 1.056928496 |
| 0.179366667  | 0.079855556 | 1.056912216 |
| 0.209233333  | 0.079844444 | 1.056904076 |
| 0.177        | 0.079788889 | 1.056863377 |
| 0.150866667  | 0.079722222 | 1.056814541 |
| 0.0206       | 0.0797      | 1.056798263 |
| 0.0721       | 0.079666667 | 1.056773846 |
| -0.0425      | 0.079566667 | 1.056700598 |
| 0.0498       | 0.079544444 | 1.056684322 |
| 0.079966667  | 0.079533333 | 1.056676184 |
| -0.002233333 | 0.079433333 | 1.056602943 |
| -0.0567      | 0.079388889 | 1.056570393 |
| 0.151733333  | 0.0793      | 1.056505297 |
| -0.030833333 | 0.079288889 | 1.05649716  |
| 0.0915       | 0.079233333 | 1.056456477 |
| -0.003533333 | 0.0792      | 1.056432068 |
| -0.0292      | 0.079188889 | 1.056423932 |
| 0.1339       | 0.079177778 | 1.056415795 |
| 0.039233333  | 0.079166667 | 1.056407659 |
| -0.344166667 | 0.079066667 | 1.056334437 |
| -0.012833333 | 0.079022222 | 1.056301896 |
| 0.027233333  | 0.079       | 1.056285625 |
| 0.110733333  | 0.078966667 | 1.05626122  |
| 0.128233333  | 0.078955556 | 1.056253085 |
| 0.142966667  | 0.0789      | 1.056212412 |
| 0.221366667  | 0.0789      | 1.056212412 |
| 0.209        | 0.078866667 | 1.056188008 |
| -0.047233333 | 0.078822222 | 1.056155471 |
| -0.121266667 | 0.078811111 | 1.056147337 |
| -0.007333333 | 0.078666667 | 1.0560416   |
| -0.129033333 | 0.078666667 | 1.0560416   |
| 0.073833333  | 0.078633333 | 1.0560172   |
| -0.041866667 | 0.0786      | 1.055992801 |
| 0.123333333  | 0.078544444 | 1.055952138 |
| 0.2211       | 0.078533333 | 1.055944005 |
| 0.0057       | 0.078522222 | 1.055935873 |
| 0.177533333  | 0.078444444 | 1.055878947 |
| 0.133066667  | 0.078433333 | 1.055870815 |
| 0.060866667  | 0.078411111 | 1.055854552 |
| -0.1644      | 0.0784      | 1.05584642  |
| 0.002466667  | 0.078366667 | 1.055822025 |
| -0.044933333 | 0.078322222 | 1.055789499 |

|              |             |             |
|--------------|-------------|-------------|
| 0.073433333  | 0.0783      | 1.055773237 |
| 0.332533333  | 0.078266667 | 1.055748843 |
| 0.0748       | 0.0782      | 1.055700059 |
| -0.2533      | 0.078144444 | 1.055659406 |
| 0.0112       | 0.078111111 | 1.055635016 |
| 0.049566667  | 0.078077778 | 1.055610626 |
| 0.214633333  | 0.078044444 | 1.055586236 |
| -0.005933333 | 0.078033333 | 1.055578106 |
| -0.051033333 | 0.077933333 | 1.055504942 |
| -0.029333333 | 0.0779      | 1.055480555 |
| -0.0064      | 0.077877778 | 1.055464297 |
| 0.102        | 0.077844444 | 1.055439911 |
| 0.020033333  | 0.077811111 | 1.055415525 |
| 0.082766667  | 0.077777778 | 1.05539114  |
| 0.148366667  | 0.077777778 | 1.05539114  |
| -0.100033333 | 0.077766667 | 1.055383012 |
| -0.0445      | 0.077744444 | 1.055366756 |
| -0.031366667 | 0.077744444 | 1.055366756 |
| 0.127466667  | 0.077711111 | 1.055342372 |
| 0.0759       | 0.0777      | 1.055334244 |
| 0.1399       | 0.077655556 | 1.055301734 |
| -0.167933333 | 0.077633333 | 1.055285479 |
| -0.1236      | 0.077611111 | 1.055269224 |
| 0.114733333  | 0.077555556 | 1.055228588 |
| 0.0251       | 0.077555556 | 1.055228588 |
| 0.0066       | 0.077533333 | 1.055212334 |
| 0.070366667  | 0.077533333 | 1.055212334 |
| 0.1201       | 0.077533333 | 1.055212334 |
| -0.149033333 | 0.077522222 | 1.055204207 |
| 0.0869       | 0.077511111 | 1.055196081 |
| 0.1249       | 0.077477778 | 1.055171701 |
| 0.216833333  | 0.077466667 | 1.055163574 |
| -0.105066667 | 0.077455556 | 1.055155448 |
| 0.0424       | 0.077433333 | 1.055139195 |
| 0.059733333  | 0.0774      | 1.055114816 |
| 0.1059       | 0.077388889 | 1.05510669  |
| 0.1149       | 0.077388889 | 1.05510669  |
| 0.110666667  | 0.077288889 | 1.055033558 |
| 0.100233333  | 0.077277778 | 1.055025433 |
| 0.074066667  | 0.077211111 | 1.054976682 |
| -0.073333333 | 0.077133333 | 1.054919808 |
| 0.079733333  | 0.077111111 | 1.054903559 |
| 0.109833333  | 0.076966667 | 1.054797946 |
| 0.062966667  | 0.076955556 | 1.054789822 |
| -0.172133333 | 0.076933333 | 1.054773575 |
| 0.0244       | 0.0769      | 1.054749205 |
| 0.131666667  | 0.076811111 | 1.054684221 |

|              |             |             |
|--------------|-------------|-------------|
| -0.0041      | 0.076766667 | 1.05465173  |
| 0.056933333  | 0.076711111 | 1.054611118 |
| -0.009666667 | 0.076688889 | 1.054594874 |
| 0.1834       | 0.076677778 | 1.054586752 |
| 0.078833333  | 0.076666667 | 1.05457863  |
| 0.0367       | 0.0766      | 1.054529899 |
| 0.105033333  | 0.076544444 | 1.054489292 |
| 0.102133333  | 0.076511111 | 1.054464928 |
| -0.065766667 | 0.0765      | 1.054456807 |
| 0.055533333  | 0.0765      | 1.054456807 |
| 0.012866667  | 0.076433333 | 1.054408082 |
| -0.113766667 | 0.076411111 | 1.054391841 |
| 0.128        | 0.0764      | 1.05438372  |
| 0.138166667  | 0.076311111 | 1.054318758 |
| -0.0911      | 0.076233333 | 1.05426192  |
| 0.146533333  | 0.076222222 | 1.0542538   |
| 0.0995       | 0.076122222 | 1.054180728 |
| -0.061566667 | 0.076122222 | 1.054180728 |
| 0.077166667  | 0.0761      | 1.05416449  |
| 0.0451       | 0.076077778 | 1.054148252 |
| -0.005333333 | 0.075955556 | 1.054058951 |
| 0.078733333  | 0.075955556 | 1.054058951 |
| -0.0048      | 0.075866667 | 1.053994009 |
| 0.0077       | 0.075855556 | 1.053985892 |
| 0.078666667  | 0.075844444 | 1.053977774 |
| 0.035733333  | 0.0758      | 1.053945305 |
| -0.071333333 | 0.075766667 | 1.053920954 |
| 0.043133333  | 0.075766667 | 1.053920954 |
| -0.083266667 | 0.075744444 | 1.053904721 |
| 0.0027       | 0.075722222 | 1.053888487 |
| 0.121        | 0.0757      | 1.053872254 |
| 0.0403       | 0.075677778 | 1.053856021 |
| -0.0237      | 0.075666667 | 1.053847905 |
| -0.0688      | 0.075588889 | 1.053791092 |
| 0.108766667  | 0.075566667 | 1.05377486  |
| -0.03        | 0.075511111 | 1.053734282 |
| -0.001166667 | 0.075477778 | 1.053709936 |
| -0.012933333 | 0.0754      | 1.05365313  |
| -0.0584      | 0.0753      | 1.053580099 |
| 0.110866667  | 0.075277778 | 1.053563871 |
| 0.081266667  | 0.075244444 | 1.053539528 |
| 0.148366667  | 0.075222222 | 1.053523301 |
| -0.1189      | 0.0752      | 1.053507073 |
| -0.091833333 | 0.075144444 | 1.053466505 |
| 0.082933333  | 0.0751      | 1.053434052 |
| -0.070166667 | 0.0751      | 1.053434052 |
| 0.1239       | 0.075033333 | 1.053385374 |

|              |             |             |
|--------------|-------------|-------------|
| -0.047633333 | 0.075011111 | 1.053369149 |
| -0.083433333 | 0.074966667 | 1.053336698 |
| -0.0424      | 0.074966667 | 1.053336698 |
| 0.1429       | 0.074966667 | 1.053336698 |
| 0.0562       | 0.074922222 | 1.053304249 |
| 0.076033333  | 0.074911111 | 1.053296137 |
| -0.042466667 | 0.074833333 | 1.053239354 |
| -0.1173      | 0.074766667 | 1.053190685 |
| 0.064733333  | 0.074655556 | 1.053109575 |
| 0.038466667  | 0.074644444 | 1.053101465 |
| -0.021066667 | 0.074622222 | 1.053085244 |
| -0.056033333 | 0.074611111 | 1.053077133 |
| -0.0978      | 0.074566667 | 1.053044692 |
| -0.080066667 | 0.074566667 | 1.053044692 |
| -0.0401      | 0.074566667 | 1.053044692 |
| -0.0727      | 0.074544444 | 1.053028472 |
| 0.049466667  | 0.074522222 | 1.053012252 |
| -0.025766667 | 0.074477778 | 1.052979813 |
| -0.024266667 | 0.074477778 | 1.052979813 |
| 0.252333333  | 0.074466667 | 1.052971703 |
| 0.0025       | 0.074444444 | 1.052955484 |
| 0.141166667  | 0.0744      | 1.052923046 |
| 0.141066667  | 0.074366667 | 1.052898719 |
| 0.121866667  | 0.074311111 | 1.052858175 |
| -0.127533333 | 0.0743      | 1.052850066 |
| 0.1252       | 0.074211111 | 1.052785199 |
| 0.178066667  | 0.0742      | 1.05277709  |
| 0.233933333  | 0.074144444 | 1.052736551 |
| -0.136666667 | 0.074122222 | 1.052720335 |
| -0.037366667 | 0.074088889 | 1.052696013 |
| 0.0652       | 0.074055556 | 1.05267169  |
| 0.031333333  | 0.074011111 | 1.052639262 |
| -0.279966667 | 0.074011111 | 1.052639262 |
| 0.204733333  | 0.074011111 | 1.052639262 |
| 0.036066667  | 0.073966667 | 1.052606834 |
| -0.0699      | 0.073933333 | 1.052582514 |
| -0.065966667 | 0.073911111 | 1.052566301 |
| 0.091333333  | 0.073866667 | 1.052533875 |
| 0.172033333  | 0.073866667 | 1.052533875 |
| 0.097333333  | 0.073833333 | 1.052509557 |
| -0.033233333 | 0.0737      | 1.052412289 |
| 0.2311       | 0.0737      | 1.052412289 |
| -0.022666667 | 0.073688889 | 1.052404184 |
| -0.546533333 | 0.073688889 | 1.052404184 |
| -0.232866667 | 0.073677778 | 1.052396079 |
| 0.010133333  | 0.073577778 | 1.052323134 |
| 0.084266667  | 0.073533333 | 1.052290717 |

|              |             |             |
|--------------|-------------|-------------|
| 0.0015       | 0.073511111 | 1.052274508 |
| 0.179166667  | 0.0735      | 1.052266404 |
| 0.391066667  | 0.073455556 | 1.052233988 |
| -0.06        | 0.0734      | 1.052193469 |
| -0.201933333 | 0.073388889 | 1.052185365 |
| 0.0403       | 0.073388889 | 1.052185365 |
| 0.1172       | 0.073344444 | 1.052152951 |
| -0.012766667 | 0.073277778 | 1.052104333 |
| 0.037866667  | 0.073244444 | 1.052080024 |
| -0.008066667 | 0.073111111 | 1.051982796 |
| -0.179033333 | 0.073077778 | 1.05195849  |
| -0.0526      | 0.073055556 | 1.051942287 |
| -0.081833333 | 0.073044444 | 1.051934185 |
| 0.017333333  | 0.073022222 | 1.051917982 |
| 0.017666667  | 0.072944444 | 1.051861273 |
| -0.096433333 | 0.072922222 | 1.051845071 |
| 0.0598       | 0.072911111 | 1.05183697  |
| -0.0315      | 0.072811111 | 1.051764065 |
| 0.037133333  | 0.0728      | 1.051755965 |
| 0.008        | 0.072788889 | 1.051747865 |
| 0.104333333  | 0.072666667 | 1.051658766 |
| 0.066366667  | 0.072655556 | 1.051650667 |
| 0.124566667  | 0.072622222 | 1.051626369 |
| 0.0083       | 0.072611111 | 1.05161827  |
| 0.0217       | 0.072555556 | 1.051577775 |
| -0.297333333 | 0.0725      | 1.051537281 |
| 0.061333333  | 0.072277778 | 1.051375322 |
| 0.090466667  | 0.072233333 | 1.051342934 |
| 0.034066667  | 0.072144444 | 1.051278159 |
| 0.0305       | 0.0721      | 1.051245773 |
| 0.1217       | 0.072033333 | 1.051197197 |
| -0.043       | 0.072022222 | 1.051189101 |
| -0.001366667 | 0.072011111 | 1.051181005 |
| 0.058133333  | 0.072       | 1.051172909 |
| -0.210833333 | 0.071988889 | 1.051164813 |
| -0.018066667 | 0.071933333 | 1.051124336 |
| 0.1121       | 0.071911111 | 1.051108145 |
| 0.0886       | 0.071866667 | 1.051075765 |
| 0.011033333  | 0.071855556 | 1.05106767  |
| -0.006533333 | 0.071766667 | 1.051002912 |
| -0.026       | 0.071755556 | 1.050994818 |
| 0.100966667  | 0.071733333 | 1.050978629 |
| 0.1087       | 0.071711111 | 1.050962441 |
| -0.0497      | 0.071622222 | 1.05089769  |
| -0.002266667 | 0.071611111 | 1.050889596 |
| -0.123766667 | 0.071511111 | 1.050816756 |
| 0.092333333  | 0.0715      | 1.050808663 |

|              |             |             |
|--------------|-------------|-------------|
| 0.042566667  | 0.071433333 | 1.050760107 |
| 0.0658       | 0.071322222 | 1.050679184 |
| -0.107066667 | 0.071233333 | 1.050614451 |
| 0.183833333  | 0.071233333 | 1.050614451 |
| -0.2118      | 0.071211111 | 1.050598268 |
| -0.246866667 | 0.071211111 | 1.050598268 |
| -0.109766667 | 0.071133333 | 1.05054163  |
| -0.0588      | 0.071111111 | 1.050525449 |
| 0.1237       | 0.071022222 | 1.050460724 |
| 0.007933333  | 0.071011111 | 1.050452634 |
| 0.016        | 0.071       | 1.050444544 |
| 0.0341       | 0.070922222 | 1.050387915 |
| 0.189133333  | 0.0709      | 1.050371735 |
| 0.220466667  | 0.070888889 | 1.050363646 |
| 0.068633333  | 0.070766667 | 1.050274665 |
| 0.289133333  | 0.070722222 | 1.05024231  |
| 0.011366667  | 0.070711111 | 1.050234221 |
| 0.210766667  | 0.070711111 | 1.050234221 |
| -0.0379      | 0.070688889 | 1.050218044 |
| 0.058466667  | 0.070644444 | 1.050185691 |
| 0.040533333  | 0.070633333 | 1.050177603 |
| 0.04         | 0.070444444 | 1.050040115 |
| -0.234       | 0.070366667 | 1.049983507 |
| 0.047533333  | 0.070355556 | 1.049975421 |
| 0.147266667  | 0.070333333 | 1.049959248 |
| -0.1014      | 0.070311111 | 1.049943075 |
| -0.073566667 | 0.0703      | 1.049934989 |
| 0.042033333  | 0.070266667 | 1.04991073  |
| -0.006333333 | 0.070211111 | 1.049870301 |
| -0.011733333 | 0.070177778 | 1.049846044 |
| 0.0153       | 0.070177778 | 1.049846044 |
| 0.076133333  | 0.070144444 | 1.049821788 |
| 0.022666667  | 0.070133333 | 1.049813703 |
| 0.116633333  | 0.070122222 | 1.049805617 |
| 0.0894       | 0.070111111 | 1.049797532 |
| 0.047666667  | 0.070088889 | 1.049781362 |
| 0.1178       | 0.070033333 | 1.049740938 |
| 0.021766667  | 0.070033333 | 1.049740938 |
| 0.0981       | 0.069988889 | 1.049708599 |
| -0.145033333 | 0.069844444 | 1.049603506 |
| 0.125833333  | 0.069811111 | 1.049579256 |
| 0.1599       | 0.069766667 | 1.049546922 |
| 0.058766667  | 0.069711111 | 1.049506507 |
| -0.030533333 | 0.0697      | 1.049498424 |
| -0.103433333 | 0.069666667 | 1.049474176 |
| 0.052233333  | 0.069666667 | 1.049474176 |
| 0.2378       | 0.069655556 | 1.049466093 |

|              |             |             |
|--------------|-------------|-------------|
| 0.150666667  | 0.069611111 | 1.049433763 |
| -0.006533333 | 0.069577778 | 1.049409516 |
| 0.0814       | 0.069544444 | 1.04938527  |
| 0.127533333  | 0.069511111 | 1.049361024 |
| 0.191433333  | 0.069466667 | 1.049328698 |
| 0.004133333  | 0.069455556 | 1.049320616 |
| 0.121966667  | 0.069422222 | 1.049296372 |
| 0.0868       | 0.069411111 | 1.049288291 |
| -0.080466667 | 0.069377778 | 1.049264047 |
| 0.007266667  | 0.069377778 | 1.049264047 |
| 0.089833333  | 0.069366667 | 1.049255966 |
| 0.034733333  | 0.069355556 | 1.049247885 |
| 0.127666667  | 0.069355556 | 1.049247885 |
| 0.270833333  | 0.069344444 | 1.049239804 |
| -0.087       | 0.069344444 | 1.049239804 |
| 0.0454       | 0.069333333 | 1.049231724 |
| 0.290066667  | 0.069288889 | 1.049199401 |
| -0.013533333 | 0.069155556 | 1.049102439 |
| 0.126266667  | 0.069144444 | 1.049094359 |
| 0.281566667  | 0.0691      | 1.04906204  |
| -0.0132      | 0.069088889 | 1.049053961 |
| 0.063466667  | 0.069055556 | 1.049029723 |
| 0.036133333  | 0.069055556 | 1.049029723 |
| 0.014933333  | 0.069044444 | 1.049021644 |
| -0.002866667 | 0.069011111 | 1.048997407 |
| 0.1006       | 0.068922222 | 1.048932777 |
| 0.2316       | 0.0689      | 1.04891662  |
| -0.082966667 | 0.068877778 | 1.048900463 |
| -0.1909      | 0.068844444 | 1.048876229 |
| 0.034866667  | 0.068844444 | 1.048876229 |
| 0.155633333  | 0.068844444 | 1.048876229 |
| -0.064566667 | 0.068722222 | 1.048787374 |
| -0.0542      | 0.0687      | 1.048771219 |
| 0.0208       | 0.068677778 | 1.048755065 |
| 0.044666667  | 0.068655556 | 1.048738911 |
| 0.0061       | 0.068633333 | 1.048722757 |
| -0.0322      | 0.068622222 | 1.04871468  |
| 0.2911       | 0.068611111 | 1.048706603 |
| 0.0393       | 0.0686      | 1.048698526 |
| 0.009133333  | 0.068555556 | 1.04866622  |
| -0.077233333 | 0.068555556 | 1.04866622  |
| 0.168966667  | 0.068533333 | 1.048650067 |
| 0.2291       | 0.068477778 | 1.048609686 |
| 0.092066667  | 0.068344444 | 1.048512779 |
| -0.129566667 | 0.068311111 | 1.048488553 |
| -0.001366667 | 0.068277778 | 1.048464328 |
| 0.0926       | 0.068266667 | 1.048456253 |

|              |             |             |
|--------------|-------------|-------------|
| 0.0491       | 0.068211111 | 1.04841588  |
| 0.1305       | 0.0682      | 1.048407806 |
| -0.019633333 | 0.068177778 | 1.048391657 |
| 0.005        | 0.068055556 | 1.048302843 |
| -0.0131      | 0.068055556 | 1.048302843 |
| -0.0676      | 0.068033333 | 1.048286696 |
| -0.129933333 | 0.0679      | 1.048189818 |
| -0.136233333 | 0.0679      | 1.048189818 |
| 0.069866667  | 0.067822222 | 1.04813331  |
| -0.0833      | 0.067822222 | 1.04813331  |
| -0.061633333 | 0.067744444 | 1.048076805 |
| 0.099933333  | 0.067633333 | 1.047996089 |
| 0.101633333  | 0.067622222 | 1.047988018 |
| 0.240066667  | 0.067611111 | 1.047979947 |
| 0.0889       | 0.067577778 | 1.047955734 |
| 0.246733333  | 0.067533333 | 1.04792345  |
| -0.0462      | 0.0675      | 1.047899238 |
| -0.140866667 | 0.067433333 | 1.047850816 |
| 0.229133333  | 0.067411111 | 1.047834676 |
| 0.127666667  | 0.067311111 | 1.047762048 |
| -0.160266667 | 0.0673      | 1.047753979 |
| 0.0251       | 0.067288889 | 1.047745909 |
| -0.088966667 | 0.067222222 | 1.047697494 |
| -0.094066667 | 0.0672      | 1.047681357 |
| -0.100166667 | 0.067188889 | 1.047673288 |
| 0.131633333  | 0.067188889 | 1.047673288 |
| 0.069433333  | 0.067122222 | 1.047624876 |
| 0.044133333  | 0.0671      | 1.047608739 |
| -0.049166667 | 0.067055556 | 1.047576467 |
| -0.070433333 | 0.067055556 | 1.047576467 |
| 0.149166667  | 0.067044444 | 1.047568399 |
| 0.113266667  | 0.067       | 1.047536127 |
| 0.071866667  | 0.066988889 | 1.047528059 |
| 0.0154       | 0.066966667 | 1.047511924 |
| 0.0823       | 0.066955556 | 1.047503857 |
| 0.0785       | 0.066955556 | 1.047503857 |
| 0.047        | 0.0669      | 1.04746352  |
| 0.182466667  | 0.066866667 | 1.047439319 |
| 0.125733333  | 0.066866667 | 1.047439319 |
| -0.010466667 | 0.066811111 | 1.047398984 |
| 0.0991       | 0.066733333 | 1.047342519 |
| 0.057666667  | 0.066677778 | 1.047302189 |
| -0.001166667 | 0.066677778 | 1.047302189 |
| -0.0605      | 0.066633333 | 1.047269925 |
| 0.126366667  | 0.066611111 | 1.047253794 |
| 0.0441       | 0.066611111 | 1.047253794 |
| -0.1228      | 0.066611111 | 1.047253794 |



|              |             |             |
|--------------|-------------|-------------|
| 0.046566667  | 0.066566667 | 1.047221532 |
| 0.123766667  | 0.066544444 | 1.047205402 |
| 0.064633333  | 0.066511111 | 1.047181207 |
| 0.038366667  | 0.066444444 | 1.047132818 |
| 0.017666667  | 0.066444444 | 1.047132818 |
| 0.017133333  | 0.066433333 | 1.047124753 |
| 0.055233333  | 0.066411111 | 1.047108624 |
| -0.156133333 | 0.0664      | 1.04710056  |
| -0.118933333 | 0.0664      | 1.04710056  |
| -0.030133333 | 0.0664      | 1.04710056  |
| 0.104633333  | 0.066277778 | 1.047011855 |
| 0.006133333  | 0.066255556 | 1.046995728 |
| -0.029566667 | 0.066255556 | 1.046995728 |
| 0.1634       | 0.066255556 | 1.046995728 |
| -0.054066667 | 0.066233333 | 1.046979601 |
| -0.1818      | 0.066233333 | 1.046979601 |
| -0.026633333 | 0.066177778 | 1.046939284 |
| 0.028166667  | 0.066133333 | 1.046907032 |
| 0.020233333  | 0.066111111 | 1.046890907 |
| 0.028233333  | 0.066111111 | 1.046890907 |
| 0.088266667  | 0.0661      | 1.046882844 |
| -0.054533333 | 0.066066667 | 1.046858656 |
| -0.0646      | 0.066055556 | 1.046850594 |
| -0.168166667 | 0.066044444 | 1.046842531 |
| 0.032333333  | 0.066011111 | 1.046818344 |
| -0.0088      | 0.066011111 | 1.046818344 |
| 0.1048       | 0.065977778 | 1.046794158 |
| -0.012566667 | 0.065911111 | 1.046745787 |
| -0.016166667 | 0.065822222 | 1.046681296 |
| 0.0588       | 0.065688889 | 1.046584566 |
| 0.014233333  | 0.065588889 | 1.046512025 |
| 0.096533333  | 0.065544444 | 1.046479786 |
| 0.2119       | 0.065511111 | 1.046455607 |
| -0.0344      | 0.065344444 | 1.046334723 |
| 0.053666667  | 0.065311111 | 1.046310548 |
| -0.0566      | 0.0652      | 1.046229968 |
| 0.048133333  | 0.065188889 | 1.04622191  |
| 0.067233333  | 0.065188889 | 1.04622191  |
| -0.092233333 | 0.065188889 | 1.04622191  |
| -0.1132      | 0.065177778 | 1.046213853 |
| -0.079766667 | 0.065044444 | 1.046117167 |
| 0.044233333  | 0.064988889 | 1.046076883 |
| 0.085166667  | 0.064955556 | 1.046052714 |
| -0.057633333 | 0.064944444 | 1.046044658 |
| 0.1161       | 0.064922222 | 1.046028545 |
| 0.227966667  | 0.064844444 | 1.045972154 |
| -0.166333333 | 0.064811111 | 1.045947987 |

|              |             |             |
|--------------|-------------|-------------|
| 0.238033333  | 0.064733333 | 1.0458916   |
| -0.086233333 | 0.064722222 | 1.045883545 |
| -0.099033333 | 0.064722222 | 1.045883545 |
| 0.112433333  | 0.064477778 | 1.04570635  |
| 0.0748       | 0.064466667 | 1.045698296 |
| -0.003166667 | 0.064422222 | 1.045666082 |
| 0.204566667  | 0.0644      | 1.045649976 |
| 0.1083       | 0.0644      | 1.045649976 |
| 0.088266667  | 0.064377778 | 1.045633869 |
| -0.1317      | 0.064311111 | 1.045585552 |
| -0.0679      | 0.0643      | 1.045577499 |
| 0.266333333  | 0.064233333 | 1.045529185 |
| -0.273466667 | 0.064211111 | 1.04551308  |
| 0.177        | 0.0642      | 1.045505028 |
| -0.056966667 | 0.064133333 | 1.045456716 |
| -0.013633333 | 0.064077778 | 1.045416459 |
| 0.1615       | 0.064022222 | 1.045376202 |
| 0.242966667  | 0.064022222 | 1.045376202 |
| 0.096233333  | 0.063977778 | 1.045343998 |
| -0.121133333 | 0.063955556 | 1.045327897 |
| 0.185566667  | 0.063922222 | 1.045303745 |
| -0.0417      | 0.063911111 | 1.045295694 |
| -0.015066667 | 0.063877778 | 1.045271543 |
| 0.016466667  | 0.063811111 | 1.045223242 |
| 0.135366667  | 0.063777778 | 1.045199093 |
| -0.158633333 | 0.063766667 | 1.045191043 |
| 0.0011       | 0.063755556 | 1.045182994 |
| 0.053266667  | 0.063711111 | 1.045150796 |
| 0.089466667  | 0.063466667 | 1.044973724 |
| 0.040966667  | 0.063366667 | 1.044901295 |
| -0.023566667 | 0.063333333 | 1.044877153 |
| 0.1457       | 0.063311111 | 1.044861058 |
| -0.0206      | 0.063288889 | 1.044844964 |
| 0.063866667  | 0.063255556 | 1.044820824 |
| -0.029366667 | 0.063255556 | 1.044820824 |
| 0.050866667  | 0.063211111 | 1.044788637 |
| -0.129133333 | 0.0632      | 1.04478059  |
| 0.039933333  | 0.063188889 | 1.044772544 |
| -0.004533333 | 0.063155556 | 1.044748405 |
| 0.058533333  | 0.0631      | 1.044708174 |
| -0.0287      | 0.063066667 | 1.044684036 |
| -0.1306      | 0.063011111 | 1.044643808 |
| -0.0893      | 0.062977778 | 1.044619672 |
| 0.185666667  | 0.062977778 | 1.044619672 |
| 0.335266667  | 0.062966667 | 1.044611627 |
| 0.0947       | 0.062855556 | 1.044531178 |
| 0.054833333  | 0.062833333 | 1.044515089 |

|              |             |             |
|--------------|-------------|-------------|
| -0.075433333 | 0.062755556 | 1.044458779 |
| 0.085766667  | 0.062722222 | 1.044434647 |
| 0.133033333  | 0.062722222 | 1.044434647 |
| 0.0234       | 0.062711111 | 1.044426603 |
| 0.193966667  | 0.062666667 | 1.044394429 |
| -0.004466667 | 0.062622222 | 1.044362255 |
| 0.001166667  | 0.062611111 | 1.044354212 |
| -0.014466667 | 0.0626      | 1.044346168 |
| 0.165933333  | 0.062566667 | 1.044322039 |
| 0.009433333  | 0.062533333 | 1.044297911 |
| -0.0237      | 0.062533333 | 1.044297911 |
| 0.050566667  | 0.062411111 | 1.044209443 |
| 0.324133333  | 0.062388889 | 1.044193359 |
| 0.168433333  | 0.062377778 | 1.044185317 |
| 0.075433333  | 0.062344444 | 1.044161192 |
| 0.1139       | 0.062333333 | 1.04415315  |
| 0.069833333  | 0.062311111 | 1.044137067 |
| 0.024866667  | 0.062311111 | 1.044137067 |
| -0.213566667 | 0.062277778 | 1.044112942 |
| 0.023933333  | 0.062233333 | 1.044080777 |
| -0.019766667 | 0.062222222 | 1.044072736 |
| 0.004133333  | 0.062144444 | 1.04401645  |
| 0.365633333  | 0.0621      | 1.043984288 |
| 0.134733333  | 0.0621      | 1.043984288 |
| -0.025533333 | 0.062033333 | 1.043936047 |
| -0.090133333 | 0.062022222 | 1.043928007 |
| -0.013166667 | 0.061977778 | 1.043895848 |
| -0.074766667 | 0.061944444 | 1.043871729 |
| 0.101333333  | 0.061922222 | 1.04385565  |
| 0.031766667  | 0.061866667 | 1.043815454 |
| -0.311533333 | 0.061855556 | 1.043807415 |
| 0.6234       | 0.061766667 | 1.043743105 |
| 0.001966667  | 0.061733333 | 1.043718989 |
| 0.057066667  | 0.061711111 | 1.043702913 |
| 0.095033333  | 0.0617      | 1.043694875 |
| 0.045833333  | 0.061666667 | 1.04367076  |
| -0.055033333 | 0.061611111 | 1.043630571 |
| -0.0653      | 0.061555556 | 1.043590384 |
| 0.095766667  | 0.061555556 | 1.043590384 |
| 0.0426       | 0.061544444 | 1.043582346 |
| -0.017633333 | 0.061488889 | 1.043542161 |
| 0.155466667  | 0.061477778 | 1.043534124 |
| 0.0264       | 0.061466667 | 1.043526087 |
| -0.076366667 | 0.061466667 | 1.043526087 |
| -0.042666667 | 0.061366667 | 1.043453758 |
| -0.001466667 | 0.061333333 | 1.043429649 |
| 0.090166667  | 0.061333333 | 1.043429649 |

|              |             |             |
|--------------|-------------|-------------|
| -0.1273      | 0.061322222 | 1.043421613 |
| 0.043933333  | 0.061311111 | 1.043413577 |
| 0.1852       | 0.0613      | 1.043405541 |
| 0.158433333  | 0.061277778 | 1.043389469 |
| -0.220466667 | 0.061255556 | 1.043373398 |
| 0.1049       | 0.061233333 | 1.043357327 |
| 0.125433333  | 0.0612      | 1.04333322  |
| 0.025566667  | 0.061177778 | 1.04331715  |
| 0.0601       | 0.061122222 | 1.043276974 |
| -0.101       | 0.061055556 | 1.043228766 |
| 0.116433333  | 0.061044444 | 1.043220731 |
| 0.000366667  | 0.061       | 1.043188594 |
| -0.0826      | 0.060888889 | 1.043108254 |
| 0.0497       | 0.060844444 | 1.04307612  |
| 0.087866667  | 0.060844444 | 1.04307612  |
| 0.122966667  | 0.060811111 | 1.04305202  |
| -0.012833333 | 0.0608      | 1.043043987 |
| 0.065533333  | 0.060777778 | 1.043027921 |
| -0.032033333 | 0.060766667 | 1.043019888 |
| 0.183166667  | 0.060755556 | 1.043011855 |
| -0.041066667 | 0.060744444 | 1.043003822 |
| -0.061066667 | 0.060611111 | 1.042907432 |
| 0.019033333  | 0.060611111 | 1.042907432 |
| 0.19         | 0.060588889 | 1.042891368 |
| 0.165833333  | 0.060577778 | 1.042883336 |
| 0.057033333  | 0.060533333 | 1.042851209 |
| 0.2113       | 0.060533333 | 1.042851209 |
| -0.1031      | 0.060511111 | 1.042835146 |
| -0.163966667 | 0.060466667 | 1.04280302  |
| 0.070266667  | 0.060388889 | 1.042746803 |
| -0.1032      | 0.060355556 | 1.042722711 |
| 0.497266667  | 0.060333333 | 1.042706649 |
| -0.0772      | 0.060311111 | 1.042690588 |
| -0.031366667 | 0.060255556 | 1.042650437 |
| 0.011266667  | 0.060244444 | 1.042642407 |
| 0.105766667  | 0.060222222 | 1.042626347 |
| -0.240933333 | 0.060188889 | 1.042602258 |
| 0.096133333  | 0.060166667 | 1.042586198 |
| -0.1148      | 0.060133333 | 1.04256211  |
| 0.022466667  | 0.060033333 | 1.042489847 |
| -0.040366667 | 0.06        | 1.042465761 |
| 0.023233333  | 0.059988889 | 1.042457732 |
| -0.0361      | 0.059988889 | 1.042457732 |
| 0.292033333  | 0.059988889 | 1.042457732 |
| 0.084233333  | 0.059955556 | 1.042433647 |
| -0.121766667 | 0.059944444 | 1.042425618 |
| -0.035966667 | 0.0599      | 1.042393505 |

|              |             |             |
|--------------|-------------|-------------|
| -0.0129      | 0.059855556 | 1.042361393 |
| 0.088733333  | 0.059811111 | 1.042329282 |
| -0.0403      | 0.0598      | 1.042321254 |
| 0.077533333  | 0.059788889 | 1.042313227 |
| 0.512866667  | 0.059744444 | 1.042281117 |
| 0.000766667  | 0.059733333 | 1.04227309  |
| 0.042466667  | 0.059711111 | 1.042257036 |
| 0.3612       | 0.059688889 | 1.042240982 |
| 0.0872       | 0.059677778 | 1.042232955 |
| 0.000166667  | 0.059644444 | 1.042208874 |
| 0.063466667  | 0.059644444 | 1.042208874 |
| -0.0543      | 0.0596      | 1.042176768 |
| -0.011166667 | 0.059588889 | 1.042168742 |
| -0.143866667 | 0.059555556 | 1.042144663 |
| 0.0145       | 0.059533333 | 1.04212861  |
| 0.2026       | 0.059533333 | 1.04212861  |
| 0.12         | 0.0595      | 1.042104532 |
| -0.065233333 | 0.059488889 | 1.042096506 |
| 0.0059       | 0.059466667 | 1.042080455 |
| -0.0182      | 0.059433333 | 1.042056378 |
| -0.0221      | 0.059411111 | 1.042040327 |
| -0.030933333 | 0.059411111 | 1.042040327 |
| 0.1177       | 0.0594      | 1.042032302 |
| 0.070766667  | 0.059355556 | 1.042000201 |
| 0.0151       | 0.059322222 | 1.041976126 |
| -0.0846      | 0.059311111 | 1.041968101 |
| -0.032233333 | 0.0592      | 1.041887855 |
| -0.0494      | 0.059166667 | 1.041863783 |
| 0.018833333  | 0.059155556 | 1.041855759 |
| -0.044233333 | 0.059155556 | 1.041855759 |
| 0.3279       | 0.059155556 | 1.041855759 |
| -0.015566667 | 0.059       | 1.041743429 |
| -0.4508      | 0.058988889 | 1.041735406 |
| 0.100066667  | 0.058988889 | 1.041735406 |
| 0.008133333  | 0.058888889 | 1.041663201 |
| 0.011033333  | 0.058844444 | 1.041631111 |
| -0.0621      | 0.058844444 | 1.041631111 |
| 0.0795       | 0.058844444 | 1.041631111 |
| -0.0753      | 0.058822222 | 1.041615067 |
| -0.055433333 | 0.0588      | 1.041599023 |
| -0.208966667 | 0.058788889 | 1.041591001 |
| 0.191633333  | 0.058755556 | 1.041566935 |
| 0.160466667  | 0.058744444 | 1.041558913 |
| -0.012266667 | 0.0587      | 1.041526827 |
| 0.016833333  | 0.058677778 | 1.041510784 |
| 0.1366       | 0.058677778 | 1.041510784 |
| 0.1333       | 0.058666667 | 1.041502763 |

|              |             |             |
|--------------|-------------|-------------|
| 0.017333333  | 0.058666667 | 1.041502763 |
| 0.0705       | 0.058588889 | 1.041446616 |
| 0.080233333  | 0.058555556 | 1.041422553 |
| -0.150966667 | 0.058544444 | 1.041414533 |
| -0.086966667 | 0.058511111 | 1.041390471 |
| -0.1108      | 0.0585      | 1.041382451 |
| -0.083933333 | 0.0584      | 1.04131027  |
| 0.033033333  | 0.058377778 | 1.041294231 |
| -0.1653      | 0.058344444 | 1.041270172 |
| 0.0408       | 0.058222222 | 1.041181961 |
| 0.087933333  | 0.058211111 | 1.041173943 |
| -0.011       | 0.0582      | 1.041165924 |
| 0.122466667  | 0.058188889 | 1.041157905 |
| -0.0526      | 0.058011111 | 1.041029615 |
| -0.0098      | 0.057977778 | 1.041005563 |
| -0.013566667 | 0.057888889 | 1.040941425 |
| 0.0878       | 0.057844444 | 1.040909358 |
| 0.049566667  | 0.057788889 | 1.040869275 |
| 0.076        | 0.057666667 | 1.040781098 |
| 0.003733333  | 0.057611111 | 1.040741021 |
| -0.015166667 | 0.057588889 | 1.04072499  |
| -0.057333333 | 0.057588889 | 1.04072499  |
| -0.026633333 | 0.057533333 | 1.040684914 |
| 0.010433333  | 0.057522222 | 1.040676899 |
| -0.1608      | 0.057444444 | 1.040620796 |
| 0.240366667  | 0.0574      | 1.040588739 |
| 0.040866667  | 0.057377778 | 1.040572711 |
| -0.302733333 | 0.057366667 | 1.040564697 |
| 0.040433333  | 0.057333333 | 1.040540655 |
| -0.097733333 | 0.057311111 | 1.040524627 |
| 0.047533333  | 0.057288889 | 1.0405086   |
| -0.073333333 | 0.0572      | 1.040444493 |
| -0.0437      | 0.0572      | 1.040444493 |
| -0.0341      | 0.057144444 | 1.040404428 |
| 0.2941       | 0.057133333 | 1.040396415 |
| 0.0151       | 0.057033333 | 1.040324303 |
| 0.003766667  | 0.056922222 | 1.040244184 |
| -0.081       | 0.056788889 | 1.040148049 |
| 0.190166667  | 0.056733333 | 1.040107996 |
| -0.022066667 | 0.056688889 | 1.040075954 |
| 0.093033333  | 0.056666667 | 1.040059934 |
| 0.155833333  | 0.056655556 | 1.040051924 |
| -0.034933333 | 0.0566      | 1.040011874 |
| 0.040666667  | 0.056533333 | 1.039963816 |
| -0.288733333 | 0.056511111 | 1.039947798 |
| 0.041766667  | 0.056511111 | 1.039947798 |
| 0.0758       | 0.056411111 | 1.039875716 |

|              |             |             |
|--------------|-------------|-------------|
| -0.002966667 | 0.056366667 | 1.039843682 |
| 0.0767       | 0.056333333 | 1.039819657 |
| 0.039066667  | 0.056311111 | 1.03980364  |
| 0.019766667  | 0.056244444 | 1.039755592 |
| 0.189966667  | 0.056244444 | 1.039755592 |
| -0.069566667 | 0.056244444 | 1.039755592 |
| -0.001966667 | 0.056233333 | 1.039747584 |
| 0.0462       | 0.0562      | 1.039723561 |
| -0.017833333 | 0.056188889 | 1.039715554 |
| -0.0132      | 0.056188889 | 1.039715554 |
| -0.050933333 | 0.056111111 | 1.039659503 |
| 0.014033333  | 0.056111111 | 1.039659503 |
| -0.0482      | 0.056088889 | 1.039643489 |
| 0.243266667  | 0.056077778 | 1.039635482 |
| -0.0589      | 0.056066667 | 1.039627475 |
| -0.001533333 | 0.056044444 | 1.039611462 |
| -0.1033      | 0.055966667 | 1.039555416 |
| 0.254533333  | 0.055966667 | 1.039555416 |
| -0.0956      | 0.055944444 | 1.039539404 |
| -0.052833333 | 0.055911111 | 1.039515385 |
| 0.041966667  | 0.055822222 | 1.03945134  |
| -0.127       | 0.055822222 | 1.03945134  |
| 0.141366667  | 0.055766667 | 1.039411313 |
| -0.079966667 | 0.055755556 | 1.039403308 |
| -0.114       | 0.055633333 | 1.039315256 |
| -0.143866667 | 0.055622222 | 1.039307251 |
| 0.089433333  | 0.055622222 | 1.039307251 |
| 0.041766667  | 0.055611111 | 1.039299247 |
| 0.0532       | 0.0556      | 1.039291243 |
| 0.104466667  | 0.055588889 | 1.039283238 |
| 0.079933333  | 0.055533333 | 1.039243218 |
| -3.33E-05    | 0.055522222 | 1.039235214 |
| 0.0807       | 0.055511111 | 1.039227211 |
| -0.0348      | 0.0555      | 1.039219207 |
| -0.332933333 | 0.055422222 | 1.039163183 |
| -0.031366667 | 0.055344444 | 1.039107161 |
| -0.0883      | 0.055311111 | 1.039083153 |
| -0.130533333 | 0.055266667 | 1.039051143 |
| 0.1244       | 0.055255556 | 1.039043141 |
| 0.0368       | 0.055255556 | 1.039043141 |
| 0.020366667  | 0.0552      | 1.03900313  |
| 0.0667       | 0.055177778 | 1.038987126 |
| 0.094933333  | 0.055166667 | 1.038979124 |
| 0.079566667  | 0.055022222 | 1.038875105 |
| 0.002466667  | 0.055022222 | 1.038875105 |
| 0.1075       | 0.054833333 | 1.038739097 |
| 0.058633333  | 0.054833333 | 1.038739097 |

|              |             |             |
|--------------|-------------|-------------|
| 0.145866667  | 0.054822222 | 1.038731097 |
| 0.2074       | 0.054766667 | 1.038691098 |
| 0.048833333  | 0.054755556 | 1.038683098 |
| 0.1301       | 0.054677778 | 1.038627103 |
| 0.144533333  | 0.054633333 | 1.038595107 |
| 0.2271       | 0.054622222 | 1.038587108 |
| -0.028566667 | 0.054622222 | 1.038587108 |
| 0.273733333  | 0.054611111 | 1.038579109 |
| -0.007466667 | 0.054522222 | 1.038515121 |
| -0.052966667 | 0.054444444 | 1.038459135 |
| -0.051133333 | 0.054444444 | 1.038459135 |
| 0.000733333  | 0.0544      | 1.038427144 |
| 0.036033333  | 0.054344444 | 1.038387157 |
| 0.042866667  | 0.054322222 | 1.038371162 |
| 0.0268       | 0.0543      | 1.038355168 |
| -0.092366667 | 0.0543      | 1.038355168 |
| -0.131733333 | 0.054266667 | 1.038331177 |
| -0.0376      | 0.054255556 | 1.03832318  |
| -0.023       | 0.054166667 | 1.038259208 |
| 0.046266667  | 0.054111111 | 1.038219227 |
| 0.005233333  | 0.054088889 | 1.038203235 |
| -0.1182      | 0.054055556 | 1.038179248 |
| 0.003966667  | 0.054022222 | 1.038155261 |
| 0.1801       | 0.054       | 1.038139271 |
| -0.0606      | 0.053988889 | 1.038131275 |
| -0.0873      | 0.053933333 | 1.038091299 |
| 0.061866667  | 0.053922222 | 1.038083304 |
| 0.001533333  | 0.0539      | 1.038067315 |
| 0.1884       | 0.053844444 | 1.038027341 |
| 0.195066667  | 0.053722222 | 1.037939406 |
| 0.018266667  | 0.053722222 | 1.037939406 |
| -0.0418      | 0.053688889 | 1.037915424 |
| -0.0099      | 0.053666667 | 1.037899437 |
| -0.088433333 | 0.0536      | 1.037851477 |
| -0.002233333 | 0.053577778 | 1.037835491 |
| 0.156833333  | 0.053544444 | 1.037811512 |
| -0.198166667 | 0.053511111 | 1.037787534 |
| 0.082633333  | 0.0535      | 1.037779541 |
| 0.143066667  | 0.053488889 | 1.037771549 |
| -0.037833333 | 0.053477778 | 1.037763556 |
| 0.089166667  | 0.053344444 | 1.037667651 |
| 0.004666667  | 0.053333333 | 1.037659659 |
| -0.038166667 | 0.053288889 | 1.037627693 |
| -0.158033333 | 0.053266667 | 1.03761171  |
| -0.0134      | 0.053266667 | 1.03761171  |
| 0.047933333  | 0.053266667 | 1.03761171  |
| -0.021933333 | 0.0532      | 1.037563763 |



|              |             |             |
|--------------|-------------|-------------|
| 0.0643       | 0.053188889 | 1.037555773 |
| 0.019966667  | 0.053166667 | 1.037539791 |
| -0.2192      | 0.053166667 | 1.037539791 |
| -0.014166667 | 0.053122222 | 1.037507828 |
| 0.112833333  | 0.053088889 | 1.037483857 |
| 0.036066667  | 0.053044444 | 1.037451896 |
| 0.023966667  | 0.053033333 | 1.037443906 |
| -0.173233333 | 0.053011111 | 1.037427926 |
| 0.026033333  | 0.052911111 | 1.03735602  |
| 0.024666667  | 0.052744444 | 1.037236187 |
| -0.178733333 | 0.0527      | 1.037204234 |
| -0.0359      | 0.052688889 | 1.037196245 |
| 0.1816       | 0.052544444 | 1.037092405 |
| -0.019066667 | 0.052544444 | 1.037092405 |
| 0.0263       | 0.052533333 | 1.037084418 |
| -0.074066667 | 0.052533333 | 1.037084418 |
| -0.016733333 | 0.0525      | 1.037060457 |
| -0.073366667 | 0.0525      | 1.037060457 |
| -0.046333333 | 0.0525      | 1.037060457 |
| 0.008466667  | 0.052466667 | 1.037036496 |
| -0.028866667 | 0.052422222 | 1.037004549 |
| 0.1103       | 0.052411111 | 1.036996562 |
| 0.105933333  | 0.0524      | 1.036988575 |
| 0.007966667  | 0.052388889 | 1.036980589 |
| 0.0399       | 0.052388889 | 1.036980589 |
| 0.088033333  | 0.052344444 | 1.036948644 |
| 0.024066667  | 0.052333333 | 1.036940658 |
| -0.065       | 0.052255556 | 1.036884756 |
| 0.070433333  | 0.052244444 | 1.03687677  |
| 0.1272       | 0.052244444 | 1.03687677  |
| -0.0413      | 0.052188889 | 1.036836843 |
| -0.082666667 | 0.052177778 | 1.036828858 |
| 0.224966667  | 0.052111111 | 1.036780947 |
| 0.1344       | 0.052077778 | 1.036756993 |
| -0.086333333 | 0.052033333 | 1.036725054 |
| 0.0287       | 0.052033333 | 1.036725054 |
| 0.166866667  | 0.051966667 | 1.036677148 |
| 0.145666667  | 0.051877778 | 1.036613278 |
| -0.041433333 | 0.051877778 | 1.036613278 |
| 0.014133333  | 0.051844444 | 1.036589327 |
| 0.1122       | 0.051822222 | 1.03657336  |
| -0.284666667 | 0.051822222 | 1.03657336  |
| -0.0319      | 0.0518      | 1.036557394 |
| 0.023833333  | 0.051788889 | 1.036549411 |
| -0.1032      | 0.051766667 | 1.036533444 |
| -0.0402      | 0.051655556 | 1.036453617 |
| -0.102966667 | 0.051622222 | 1.036429671 |

|              |             |             |
|--------------|-------------|-------------|
| 0.0347       | 0.0516      | 1.036413706 |
| -0.029866667 | 0.051522222 | 1.036357833 |
| -0.013633333 | 0.051488889 | 1.036333889 |
| 0.141133333  | 0.051477778 | 1.036325907 |
| 0.112966667  | 0.051455556 | 1.036309944 |
| -0.1525      | 0.051422222 | 1.036286001 |
| 0.002133333  | 0.051422222 | 1.036286001 |
| 0.049366667  | 0.051411111 | 1.03627802  |
| 0.006366667  | 0.0514      | 1.036270039 |
| 0.5178       | 0.0514      | 1.036270039 |
| -0.033266667 | 0.051388889 | 1.036262058 |
| 0.213166667  | 0.051388889 | 1.036262058 |
| -0.0991      | 0.051355556 | 1.036238115 |
| 0.106733333  | 0.051355556 | 1.036238115 |
| -0.2079      | 0.051333333 | 1.036222154 |
| -0.003333333 | 0.051311111 | 1.036206193 |
| -1.273066667 | 0.0513      | 1.036198213 |
| 0.100333333  | 0.051288889 | 1.036190232 |
| -0.127466667 | 0.051233333 | 1.036150331 |
| -0.068733333 | 0.051166667 | 1.036102452 |
| -0.2207      | 0.051155556 | 1.036094472 |
| 0.200166667  | 0.051111111 | 1.036062554 |
| -0.114933333 | 0.051077778 | 1.036038616 |
| -0.0237      | 0.051055556 | 1.036022658 |
| 0.167066667  | 0.051       | 1.035982764 |
| -0.020833333 | 0.050944444 | 1.035942871 |
| 0.127466667  | 0.050933333 | 1.035934892 |
| -0.043933333 | 0.050933333 | 1.035934892 |
| -0.212233333 | 0.050922222 | 1.035926914 |
| 0.081266667  | 0.050922222 | 1.035926914 |
| 0.202866667  | 0.050877778 | 1.035895001 |
| 0.1652       | 0.050822222 | 1.035855111 |
| -0.1623      | 0.0508      | 1.035839156 |
| 0.160066667  | 0.050755556 | 1.035807246 |
| 0.000333333  | 0.050755556 | 1.035807246 |
| -0.027666667 | 0.050688889 | 1.035759382 |
| 0.105266667  | 0.050677778 | 1.035751405 |
| -0.053933333 | 0.050666667 | 1.035743428 |
| -0.039433333 | 0.050655556 | 1.035735451 |
| -0.0175      | 0.050633333 | 1.035719498 |
| -0.100866667 | 0.0506      | 1.035695568 |
| -0.024166667 | 0.050555556 | 1.035663662 |
| 0.0718       | 0.050522222 | 1.035639734 |
| 0.092633333  | 0.050466667 | 1.035599854 |
| -0.013133333 | 0.050433333 | 1.035575927 |
| -0.0772      | 0.050344444 | 1.035512124 |
| -0.145066667 | 0.050288889 | 1.035472249 |

|              |             |             |
|--------------|-------------|-------------|
| 0.1252       | 0.050266667 | 1.035456299 |
| -0.099766667 | 0.050266667 | 1.035456299 |
| 0.1367       | 0.050233333 | 1.035432375 |
| -0.0596      | 0.050222222 | 1.035424401 |
| 0.486533333  | 0.050122222 | 1.035352633 |
| 0.096033333  | 0.050088889 | 1.035328712 |
| 0.006033333  | 0.050077778 | 1.035320738 |
| 0.231633333  | 0.050033333 | 1.035288844 |
| -0.0052      | 0.049933333 | 1.035217086 |
| -0.112033333 | 0.049877778 | 1.035177222 |
| -0.098766667 | 0.049811111 | 1.035129388 |
| -0.041433333 | 0.0498      | 1.035121416 |
| -0.037366667 | 0.049788889 | 1.035113443 |
| 0.062133333  | 0.049755556 | 1.035089528 |
| -0.028266667 | 0.049722222 | 1.035065612 |
| -0.015766667 | 0.049677778 | 1.035033726 |
| 0.162166667  | 0.049644444 | 1.035009812 |
| -0.077566667 | 0.049566667 | 1.034954014 |
| 0.2515       | 0.049566667 | 1.034954014 |
| -0.011166667 | 0.049555556 | 1.034946044 |
| 0.055666667  | 0.049533333 | 1.034930102 |
| -0.083866667 | 0.049522222 | 1.034922132 |
| -0.051833333 | 0.049522222 | 1.034922132 |
| 0.340066667  | 0.049511111 | 1.034914161 |
| -0.106666667 | 0.049511111 | 1.034914161 |
| -0.053033333 | 0.049488889 | 1.03489822  |
| -0.086166667 | 0.049488889 | 1.03489822  |
| -0.154233333 | 0.049466667 | 1.034882279 |
| 0.0377       | 0.049466667 | 1.034882279 |
| 0.1581       | 0.049444444 | 1.034866339 |
| -0.0171      | 0.049433333 | 1.034858369 |
| 0.0375       | 0.049433333 | 1.034858369 |
| -0.0943      | 0.049422222 | 1.034850399 |
| -0.2412      | 0.049355556 | 1.03480258  |
| -0.067433333 | 0.049333333 | 1.03478664  |
| -0.095933333 | 0.049311111 | 1.034770701 |
| 0.0237       | 0.049311111 | 1.034770701 |
| 0.220466667  | 0.049311111 | 1.034770701 |
| 0.093633333  | 0.049222222 | 1.034706948 |
| 0.133933333  | 0.049222222 | 1.034706948 |
| 0.087366667  | 0.049166667 | 1.034667104 |
| 0.164866667  | 0.049122222 | 1.03463523  |
| 0.1333       | 0.049088889 | 1.034611325 |
| 0.1325       | 0.049077778 | 1.034603357 |
| 0.161766667  | 0.049033333 | 1.034571485 |
| -0.0861      | 0.049022222 | 1.034563517 |
| 0.039833333  | 0.048966667 | 1.034523679 |

|              |             |             |
|--------------|-------------|-------------|
| -0.043       | 0.048966667 | 1.034523679 |
| 0.115933333  | 0.048922222 | 1.034491809 |
| 0.021833333  | 0.0489      | 1.034475875 |
| -0.089133333 | 0.048855556 | 1.034444006 |
| 0.117633333  | 0.048855556 | 1.034444006 |
| -0.074966667 | 0.048822222 | 1.034420106 |
| -0.1827      | 0.048822222 | 1.034420106 |
| 0.0868       | 0.048788889 | 1.034396206 |
| 0.158433333  | 0.048788889 | 1.034396206 |
| 0.066333333  | 0.048766667 | 1.034380273 |
| 0.205233333  | 0.048766667 | 1.034380273 |
| 0.0394       | 0.048755556 | 1.034372307 |
| 0.087666667  | 0.048744444 | 1.03436434  |
| -0.0599      | 0.048677778 | 1.034316544 |
| -0.001533333 | 0.048655556 | 1.034300612 |
| -0.037166667 | 0.048566667 | 1.034236888 |
| 0.026533333  | 0.0485      | 1.034189097 |
| 0.130233333  | 0.048488889 | 1.034181132 |
| -0.077166667 | 0.0484      | 1.034117415 |
| 0.069266667  | 0.048355556 | 1.034085558 |
| -0.0216      | 0.048344444 | 1.034077594 |
| 0.409033333  | 0.048344444 | 1.034077594 |
| -0.120533333 | 0.048322222 | 1.034061665 |
| 0.037033333  | 0.048288889 | 1.034037774 |
| 0.088933333  | 0.048288889 | 1.034037774 |
| 0.019566667  | 0.048288889 | 1.034037774 |
| -0.0991      | 0.048244444 | 1.034005919 |
| 0.055333333  | 0.048244444 | 1.034005919 |
| -0.0396      | 0.048244444 | 1.034005919 |
| -0.055766667 | 0.048233333 | 1.033997956 |
| 0.1389       | 0.048122222 | 1.033918324 |
| 0.0785       | 0.0481      | 1.033902398 |
| -0.073033333 | 0.047988889 | 1.033822774 |
| 0.035        | 0.047988889 | 1.033822774 |
| 0.015033333  | 0.047933333 | 1.033782964 |
| 0.0529       | 0.047911111 | 1.033767041 |
| 0.097166667  | 0.047866667 | 1.033735194 |
| 0.100233333  | 0.047766667 | 1.033663544 |
| 0.021133333  | 0.047744444 | 1.033647622 |
| -0.0473      | 0.047744444 | 1.033647622 |
| -0.042766667 | 0.0477      | 1.03361578  |
| 0.003033333  | 0.047677778 | 1.033599859 |
| -0.0178      | 0.047611111 | 1.033552097 |
| 0.1053       | 0.047566667 | 1.033520258 |
| 0.147266667  | 0.047555556 | 1.033512298 |
| -0.0901      | 0.047477778 | 1.033456581 |
| 0.1037       | 0.047433333 | 1.033424744 |

|              |             |             |
|--------------|-------------|-------------|
| 0.0718       | 0.047411111 | 1.033408826 |
| -0.0312      | 0.0474      | 1.033400868 |
| 0.052966667  | 0.047277778 | 1.033313324 |
| 0.104966667  | 0.047244444 | 1.033289449 |
| 0.183533333  | 0.047233333 | 1.033281491 |
| 0.098166667  | 0.0472      | 1.033257618 |
| 0.203766667  | 0.047188889 | 1.03324966  |
| -0.0724      | 0.047188889 | 1.03324966  |
| 0.064966667  | 0.047166667 | 1.033233745 |
| 0.049066667  | 0.047166667 | 1.033233745 |
| -0.182833333 | 0.047077778 | 1.033170086 |
| 0.080033333  | 0.047066667 | 1.033162129 |
| 0.016966667  | 0.047055556 | 1.033154172 |
| 0.171        | 0.047022222 | 1.033130301 |
| 0.0537       | 0.046944444 | 1.033074605 |
| -0.001266667 | 0.046922222 | 1.033058692 |
| 0.0726       | 0.046911111 | 1.033050736 |
| -0.0714      | 0.046866667 | 1.033018912 |
| -0.017233333 | 0.046755556 | 1.032939356 |
| 0.0257       | 0.046733333 | 1.032923445 |
| 0.059333333  | 0.0467      | 1.03289958  |
| -0.0987      | 0.046688889 | 1.032891625 |
| -0.2878      | 0.046677778 | 1.03288367  |
| 0.115066667  | 0.046655556 | 1.03286776  |
| 0.103333333  | 0.046622222 | 1.032843896 |
| 0.093733333  | 0.046622222 | 1.032843896 |
| 0.253633333  | 0.046455556 | 1.032724584 |
| 0.0231       | 0.046444444 | 1.032716631 |
| 0.037166667  | 0.046433333 | 1.032708677 |
| -0.063166667 | 0.046377778 | 1.03266891  |
| 0.0825       | 0.046333333 | 1.032637098 |
| -0.082833333 | 0.046322222 | 1.032629145 |
| 0.346266667  | 0.0463      | 1.032613239 |
| 0.007        | 0.046211111 | 1.032549619 |
| -0.007633333 | 0.046166667 | 1.03251781  |
| -0.116833333 | 0.046155556 | 1.032509858 |
| -0.052033333 | 0.046133333 | 1.032493954 |
| -0.043       | 0.046044444 | 1.032430341 |
| 0.106733333  | 0.046033333 | 1.032422389 |
| 0.1134       | 0.046011111 | 1.032406487 |
| -0.023866667 | 0.045977778 | 1.032382633 |
| 0.067533333  | 0.045966667 | 1.032374682 |
| 0.148266667  | 0.045911111 | 1.032334928 |
| -0.009133333 | 0.045833333 | 1.032279275 |
| 0.127233333  | 0.045811111 | 1.032263375 |
| 0.267866667  | 0.045766667 | 1.032231575 |
| 0.13         | 0.045711111 | 1.032191826 |

|              |             |             |
|--------------|-------------|-------------|
| 0.0314       | 0.0457      | 1.032183877 |
| -0.016066667 | 0.045655556 | 1.032152079 |
| 0.021066667  | 0.045644444 | 1.03214413  |
| 0.1073       | 0.045633333 | 1.032136181 |
| -0.0923      | 0.045633333 | 1.032136181 |
| 0.070833333  | 0.045622222 | 1.032128232 |
| 0.071266667  | 0.045533333 | 1.032064641 |
| 0.022766667  | 0.0455      | 1.032040795 |
| -0.063133333 | 0.045466667 | 1.03201695  |
| 0.023533333  | 0.045466667 | 1.03201695  |
| 0.140833333  | 0.045388889 | 1.031961314 |
| 0.0091       | 0.045355556 | 1.031937471 |
| -0.055866667 | 0.045288889 | 1.031889787 |
| 0.039033333  | 0.045288889 | 1.031889787 |
| -0.433266667 | 0.045277778 | 1.03188184  |
| 0.006766667  | 0.045255556 | 1.031865945 |
| 0.291833333  | 0.045144444 | 1.031786478 |
| -0.0437      | 0.045133333 | 1.031778531 |
| 0.073066667  | 0.045122222 | 1.031770585 |
| 0.099733333  | 0.045055556 | 1.031722908 |
| -0.241433333 | 0.045044444 | 1.031714962 |
| -0.011933333 | 0.045044444 | 1.031714962 |
| 0.0311       | 0.045011111 | 1.031691125 |
| 0.170166667  | 0.045       | 1.031683179 |
| 0.034533333  | 0.044966667 | 1.031659343 |
| 0.116533333  | 0.044922222 | 1.031627561 |
| 0.064233333  | 0.044911111 | 1.031619616 |
| 0.006666667  | 0.0449      | 1.031611671 |
| 0.143        | 0.044866667 | 1.031587836 |
| 0.2371       | 0.044744444 | 1.031500446 |
| 0.159066667  | 0.044733333 | 1.031492501 |
| -0.042366667 | 0.044722222 | 1.031484557 |
| 0.075833333  | 0.0447      | 1.031468669 |
| 0.192833333  | 0.044644444 | 1.03142895  |
| 0.0601       | 0.044644444 | 1.03142895  |
| -0.177466667 | 0.044555556 | 1.031365402 |
| -0.0622      | 0.044533333 | 1.031349516 |
| 0.083833333  | 0.044533333 | 1.031349516 |
| 0.0703       | 0.044455556 | 1.031293916 |
| -0.068466667 | 0.044411111 | 1.031262146 |
| 0.001033333  | 0.044366667 | 1.031230377 |
| 0.0199       | 0.044333333 | 1.031206551 |
| -0.026966667 | 0.044333333 | 1.031206551 |
| 0.004633333  | 0.044222222 | 1.031127134 |
| -0.1859      | 0.044188889 | 1.03110331  |
| 0.398866667  | 0.044122222 | 1.031055664 |
| 0.0023       | 0.044111111 | 1.031047723 |

|              |             |             |
|--------------|-------------|-------------|
| 0.014566667  | 0.0441      | 1.031039783 |
| 0.0338       | 0.0441      | 1.031039783 |
| -0.01        | 0.044077778 | 1.031023901 |
| 0.0135       | 0.044055556 | 1.03100802  |
| -0.136633333 | 0.044044444 | 1.03100008  |
| 0.047733333  | 0.044044444 | 1.03100008  |
| 0.054633333  | 0.044011111 | 1.030976259 |
| -0.012433333 | 0.044       | 1.030968319 |
| 0.188133333  | 0.044       | 1.030968319 |
| -0.049066667 | 0.043966667 | 1.030944499 |
| 0.110066667  | 0.043933333 | 1.030920679 |
| 0.067866667  | 0.043922222 | 1.030912739 |
| 0.012566667  | 0.043877778 | 1.030880981 |
| -0.099666667 | 0.043855556 | 1.030865102 |
| 0.0393       | 0.043833333 | 1.030849224 |
| -0.052633333 | 0.043822222 | 1.030841284 |
| 0.094533333  | 0.043822222 | 1.030841284 |
| -0.011       | 0.043811111 | 1.030833345 |
| -0.064633333 | 0.0438      | 1.030825406 |
| 0.089366667  | 0.043733333 | 1.030777773 |
| 0.183133333  | 0.043733333 | 1.030777773 |
| -0.203366667 | 0.043722222 | 1.030769834 |
| 0.131933333  | 0.043711111 | 1.030761896 |
| -0.082033333 | 0.0437      | 1.030753957 |
| -0.0816      | 0.043666667 | 1.030730142 |
| -0.040366667 | 0.043644444 | 1.030714266 |
| -0.018566667 | 0.043633333 | 1.030706327 |
| 0.011466667  | 0.043622222 | 1.030698389 |
| -0.023833333 | 0.043611111 | 1.030690451 |
| -0.0286      | 0.0436      | 1.030682513 |
| 0.071        | 0.043522222 | 1.030626949 |
| 0.154566667  | 0.0435      | 1.030611074 |
| 0.0055       | 0.043455556 | 1.030579325 |
| -0.0136      | 0.043433333 | 1.030563451 |
| 0.179866667  | 0.043388889 | 1.030531703 |
| -0.173233333 | 0.043388889 | 1.030531703 |
| 0.058233333  | 0.043388889 | 1.030531703 |
| 0.131233333  | 0.043377778 | 1.030523767 |
| -0.0144      | 0.043311111 | 1.030476148 |
| 0.124        | 0.0432      | 1.030396787 |
| -0.0239      | 0.043166667 | 1.03037298  |
| 0.161933333  | 0.043133333 | 1.030349174 |
| -0.115166667 | 0.043111111 | 1.030333303 |
| -0.025233333 | 0.0431      | 1.030325368 |
| -0.005366667 | 0.043077778 | 1.030309498 |
| 0.097533333  | 0.043033333 | 1.030277758 |
| 0.0557       | 0.042933333 | 1.030206347 |

|              |             |             |
|--------------|-------------|-------------|
| 0.034233333  | 0.042922222 | 1.030198413 |
| -0.015666667 | 0.042911111 | 1.030190478 |
| -0.0572      | 0.042888889 | 1.03017461  |
| 0.035533333  | 0.042877778 | 1.030166676 |
| 0.0575       | 0.042744444 | 1.030071473 |
| 0.0461       | 0.042744444 | 1.030071473 |
| 0.0323       | 0.042677778 | 1.030023875 |
| -0.0542      | 0.042633333 | 1.029992144 |
| 0.083366667  | 0.042622222 | 1.029984211 |
| -0.0338      | 0.042588889 | 1.029960414 |
| 0.087766667  | 0.042533333 | 1.029920753 |
| 0.054833333  | 0.0425      | 1.029896957 |
| 0.082566667  | 0.042488889 | 1.029889025 |
| -0.094       | 0.042477778 | 1.029881093 |
| 0.036966667  | 0.042477778 | 1.029881093 |
| 0.0183       | 0.042422222 | 1.029841435 |
| 0.0204       | 0.042411111 | 1.029833504 |
| 0.1517       | 0.042411111 | 1.029833504 |
| 0.2499       | 0.042355556 | 1.029793847 |
| 0.010633333  | 0.0423      | 1.029754193 |
| -0.021266667 | 0.042233333 | 1.029706609 |
| -0.021333333 | 0.042188889 | 1.029674888 |
| 0.1596       | 0.042155556 | 1.029651097 |
| 0.052433333  | 0.042155556 | 1.029651097 |
| 0.047133333  | 0.042144444 | 1.029643167 |
| 0.040233333  | 0.042133333 | 1.029635238 |
| 0.390466667  | 0.042011111 | 1.029548013 |
| 0.020466667  | 0.042011111 | 1.029548013 |
| 0.0439       | 0.042       | 1.029540083 |
| -0.040833333 | 0.041988889 | 1.029532154 |
| 0.0866       | 0.041977778 | 1.029524225 |
| -0.024866667 | 0.041955556 | 1.029508367 |
| 0.0543       | 0.041944444 | 1.029500438 |
| 0.0457       | 0.041933333 | 1.02949251  |
| -0.1062      | 0.041911111 | 1.029476652 |
| -0.0175      | 0.041855556 | 1.02943701  |
| 0.046066667  | 0.041844444 | 1.029429081 |
| -0.048066667 | 0.041822222 | 1.029413225 |
| 0.016333333  | 0.041744444 | 1.029357729 |
| -0.0249      | 0.0417      | 1.029326019 |
| 0.0253       | 0.041655556 | 1.029294309 |
| 0.057566667  | 0.041644444 | 1.029286382 |
| -0.092       | 0.041622222 | 1.029270528 |
| -0.064       | 0.041588889 | 1.029246747 |
| -0.1086      | 0.041577778 | 1.02923882  |
| -0.000766667 | 0.041555556 | 1.029222967 |
| -0.105233333 | 0.041544444 | 1.02921504  |



|              |             |             |
|--------------|-------------|-------------|
| -0.064366667 | 0.041488889 | 1.029175407 |
| 0.0253       | 0.041433333 | 1.029135777 |
| -0.0883      | 0.041433333 | 1.029135777 |
| -0.091       | 0.041411111 | 1.029119925 |
| -0.028233333 | 0.0414      | 1.029111999 |
| 0.1522       | 0.041366667 | 1.029088222 |
| 0.008966667  | 0.041355556 | 1.029080296 |
| 0.0414       | 0.041333333 | 1.029064445 |
| 0.018333333  | 0.041233333 | 1.028993118 |
| -0.007933333 | 0.041211111 | 1.028977268 |
| -0.027733333 | 0.041177778 | 1.028953494 |
| -0.073933333 | 0.0411      | 1.028898023 |
| 0.050533333  | 0.041088889 | 1.028890099 |
| 0.055466667  | 0.041011111 | 1.028834632 |
| 0.018933333  | 0.040966667 | 1.028802937 |
| -0.0215      | 0.040922222 | 1.028771244 |
| 0.1268       | 0.040866667 | 1.028731629 |
| 0.0877       | 0.040855556 | 1.028723706 |
| 0.072966667  | 0.040833333 | 1.02870786  |
| -0.237033333 | 0.040777778 | 1.028668247 |
| 0.0576       | 0.040777778 | 1.028668247 |
| -0.004066667 | 0.040755556 | 1.028652402 |
| 0.0624       | 0.040733333 | 1.028636558 |
| 0.134533333  | 0.040711111 | 1.028620714 |
| 0.3269       | 0.040666667 | 1.028589026 |
| -0.232533333 | 0.040644444 | 1.028573182 |
| 0.0319       | 0.040633333 | 1.028565261 |
| 0.058466667  | 0.0406      | 1.028541496 |
| 0.0653       | 0.040566667 | 1.028517732 |
| 0.146066667  | 0.040533333 | 1.028493968 |
| 0.139466667  | 0.040511111 | 1.028478126 |
| -0.060966667 | 0.040488889 | 1.028462285 |
| 0.030166667  | 0.040488889 | 1.028462285 |
| 0.0849       | 0.040477778 | 1.028454364 |
| 0.169866667  | 0.040455556 | 1.028438522 |
| -0.0956      | 0.040444444 | 1.028430602 |
| -0.103833333 | 0.040333333 | 1.028351399 |
| -0.0085      | 0.0403      | 1.028327639 |
| 0.1041       | 0.0403      | 1.028327639 |
| -0.044       | 0.040222222 | 1.028272202 |
| 0.072033333  | 0.040211111 | 1.028264283 |
| 0.016733333  | 0.040088889 | 1.028177174 |
| 0.043666667  | 0.040066667 | 1.028161337 |
| -0.008866667 | 0.039966667 | 1.028090072 |
| 0.133166667  | 0.039866667 | 1.028018813 |
| 0.061433333  | 0.039833333 | 1.027995061 |
| 0.043833333  | 0.039833333 | 1.027995061 |

|              |             |             |
|--------------|-------------|-------------|
| 0.1311       | 0.039822222 | 1.027987144 |
| -0.038533333 | 0.039788889 | 1.027963393 |
| 0.010166667  | 0.039777778 | 1.027955476 |
| -0.155333333 | 0.0397      | 1.027900059 |
| 0.0651       | 0.039655556 | 1.027868393 |
| 0.0948       | 0.039644444 | 1.027860477 |
| -0.087033333 | 0.039577778 | 1.027812981 |
| 0.044066667  | 0.039566667 | 1.027805065 |
| 0.056533333  | 0.039522222 | 1.027773402 |
| 0.254633333  | 0.039511111 | 1.027765487 |
| 0.014966667  | 0.039455556 | 1.02772591  |
| 0.118266667  | 0.039455556 | 1.02772591  |
| 0.193433333  | 0.039455556 | 1.02772591  |
| -0.111233333 | 0.039366667 | 1.027662591 |
| -0.013533333 | 0.039355556 | 1.027654676 |
| 0.0682       | 0.039322222 | 1.027630932 |
| 0.018766667  | 0.039311111 | 1.027623018 |
| -0.199233333 | 0.039288889 | 1.027607189 |
| -0.049833333 | 0.039255556 | 1.027583447 |
| 0.0143       | 0.039222222 | 1.027559705 |
| 0.002466667  | 0.039211111 | 1.027551791 |
| -0.046066667 | 0.039177778 | 1.02752805  |
| 0.099566667  | 0.039166667 | 1.027520136 |
| 0.022366667  | 0.039155556 | 1.027512223 |
| 0.1874       | 0.039055556 | 1.027441003 |
| 0.1059       | 0.038988889 | 1.027393527 |
| -0.000766667 | 0.038977778 | 1.027385614 |
| 0.137166667  | 0.038966667 | 1.027377702 |
| 0.0484       | 0.038944444 | 1.027361877 |
| 0.071533333  | 0.038933333 | 1.027353964 |
| 0.065966667  | 0.038922222 | 1.027346052 |
| -0.025066667 | 0.038888889 | 1.027322316 |
| -0.066833333 | 0.038888889 | 1.027322316 |
| 0.000966667  | 0.038888889 | 1.027322316 |
| 0.026633333  | 0.038877778 | 1.027314404 |
| 0.266433333  | 0.038866667 | 1.027306492 |
| 0.158766667  | 0.038822222 | 1.027274844 |
| 0.0589       | 0.038811111 | 1.027266933 |
| 0.009        | 0.038788889 | 1.02725111  |
| -0.0866      | 0.038788889 | 1.02725111  |
| 0.046766667  | 0.038777778 | 1.027243198 |
| 0.200466667  | 0.0387      | 1.027187819 |
| 0.1017       | 0.038688889 | 1.027179908 |
| -0.0081      | 0.0386      | 1.027116623 |
| -0.2971      | 0.038577778 | 1.027100802 |
| 0.126633333  | 0.038577778 | 1.027100802 |
| 0.063        | 0.038544444 | 1.027077071 |

|              |             |             |
|--------------|-------------|-------------|
| 0.027733333  | 0.038522222 | 1.027061251 |
| 0.157866667  | 0.038455556 | 1.027013792 |
| 0.177133333  | 0.038455556 | 1.027013792 |
| -0.059333333 | 0.038444444 | 1.027005882 |
| -0.0816      | 0.038433333 | 1.026997972 |
| -0.014233333 | 0.038422222 | 1.026990063 |
| 0.106833333  | 0.038388889 | 1.026966335 |
| -0.0167      | 0.038377778 | 1.026958425 |
| 0.1498       | 0.038377778 | 1.026958425 |
| 0.0757       | 0.038355556 | 1.026942607 |
| -0.226966667 | 0.038333333 | 1.026926789 |
| 0.132433333  | 0.038277778 | 1.026887244 |
| -0.025033333 | 0.038266667 | 1.026879336 |
| 0.2607       | 0.038255556 | 1.026871427 |
| -0.113933333 | 0.038222222 | 1.026847702 |
| 0.154033333  | 0.038222222 | 1.026847702 |
| 0.156166667  | 0.038177778 | 1.026816069 |
| 0.100433333  | 0.0381      | 1.026760713 |
| -0.004533333 | 0.0381      | 1.026760713 |
| 0.1801       | 0.038088889 | 1.026752805 |
| 0.0275       | 0.038077778 | 1.026744898 |
| 0.017        | 0.038055556 | 1.026729082 |
| 0.042866667  | 0.038033333 | 1.026713268 |
| 0.3363       | 0.037966667 | 1.026665824 |
| -0.028866667 | 0.037922222 | 1.026634197 |
| 0.055466667  | 0.037922222 | 1.026634197 |
| 0.0067       | 0.037922222 | 1.026634197 |
| -0.0606      | 0.037888889 | 1.026610477 |
| -0.2257      | 0.037822222 | 1.026563038 |
| 0.336966667  | 0.037811111 | 1.026555132 |
| 0.0899       | 0.0377      | 1.026476074 |
| -0.010933333 | 0.037666667 | 1.026452357 |
| 0.057266667  | 0.037633333 | 1.026428642 |
| -0.038066667 | 0.037611111 | 1.026412831 |
| -0.0616      | 0.037566667 | 1.026381212 |
| 0.0178       | 0.037511111 | 1.026341688 |
| 0.074566667  | 0.037444444 | 1.026294262 |
| 0.232933333  | 0.037444444 | 1.026294262 |
| 0.079766667  | 0.0374      | 1.026262646 |
| 0.145733333  | 0.037333333 | 1.026215224 |
| 0.017666667  | 0.037277778 | 1.026175707 |
| -0.006766667 | 0.037255556 | 1.026159901 |
| -0.0197      | 0.037233333 | 1.026144095 |
| 0.039733333  | 0.037211111 | 1.026128289 |
| -0.076466667 | 0.037144444 | 1.026080873 |
| 0.039833333  | 0.037122222 | 1.026065068 |
| -0.101233333 | 0.037111111 | 1.026057165 |

|              |             |             |
|--------------|-------------|-------------|
| 0.000366667  | 0.036944444 | 1.025938638 |
| -0.005433333 | 0.0369      | 1.025907032 |
| -0.033533333 | 0.036866667 | 1.025883329 |
| -0.050733333 | 0.036866667 | 1.025883329 |
| 0.050066667  | 0.036822222 | 1.025851726 |
| 0.159766667  | 0.036766667 | 1.025812223 |
| 0.132733333  | 0.036744444 | 1.025796422 |
| -0.0552      | 0.036733333 | 1.025788522 |
| -0.001166667 | 0.036733333 | 1.025788522 |
| -0.028766667 | 0.036666667 | 1.025741121 |
| 0.093133333  | 0.036644444 | 1.025725322 |
| -0.0455      | 0.0365      | 1.02562263  |
| 0.0313       | 0.036488889 | 1.025614731 |
| -0.023266667 | 0.036355556 | 1.025519949 |
| 0.1418       | 0.036277778 | 1.025464663 |
| -0.115533333 | 0.036255556 | 1.025448867 |
| 0.0764       | 0.036222222 | 1.025425175 |
| 0.052966667  | 0.036177778 | 1.025393585 |
| 0.178433333  | 0.036166667 | 1.025385688 |
| 0.020966667  | 0.036111111 | 1.025346203 |
| 0.072233333  | 0.036011111 | 1.025275134 |
| -0.199533333 | 0.035977778 | 1.025251446 |
| 0.1205       | 0.035933333 | 1.025219862 |
| 0.177233333  | 0.035877778 | 1.025180383 |
| -0.153666667 | 0.035877778 | 1.025180383 |
| 0.1558       | 0.035766667 | 1.02510143  |
| 0.000933333  | 0.035755556 | 1.025093535 |
| 0.180733333  | 0.035711111 | 1.025061956 |
| 0.0363       | 0.035644444 | 1.02501459  |
| 0.0761       | 0.035611111 | 1.024990907 |
| 0.036466667  | 0.035611111 | 1.024990907 |
| -0.005133333 | 0.035611111 | 1.024990907 |
| -0.162066667 | 0.0356      | 1.024983013 |
| 0.079566667  | 0.035577778 | 1.024967225 |
| -0.0111      | 0.035555556 | 1.024951437 |
| 0.054433333  | 0.035522222 | 1.024927756 |
| 0.000233333  | 0.035477778 | 1.024896182 |
| -0.114433333 | 0.035444444 | 1.024872502 |
| 0.0357       | 0.035411111 | 1.024848823 |
| -0.138866667 | 0.0354      | 1.02484093  |
| 0.0708       | 0.0353      | 1.024769896 |
| -0.054966667 | 0.035244444 | 1.024730435 |
| -0.079266667 | 0.035122222 | 1.024643625 |
| 0.009766667  | 0.035111111 | 1.024635734 |
| 0.1261       | 0.035011111 | 1.024564714 |
| -0.041033333 | 0.034955556 | 1.02452526  |
| 0.070133333  | 0.034955556 | 1.02452526  |

|              |             |             |
|--------------|-------------|-------------|
| -0.104833333 | 0.034922222 | 1.024501589 |
| -0.020566667 | 0.034911111 | 1.024493699 |
| 0.0086       | 0.034866667 | 1.024462138 |
| -0.074066667 | 0.034788889 | 1.02440691  |
| -0.019633333 | 0.034688889 | 1.024335905 |
| -0.1093      | 0.034677778 | 1.024328016 |
| -0.012366667 | 0.034677778 | 1.024328016 |
| 0.0708       | 0.034666667 | 1.024320127 |
| 0.054233333  | 0.034666667 | 1.024320127 |
| 0.155366667  | 0.034633333 | 1.024296461 |
| 0.021466667  | 0.034611111 | 1.024280684 |
| 0.1401       | 0.0346      | 1.024272795 |
| -0.005666667 | 0.034544444 | 1.024233353 |
| 0.0858       | 0.034544444 | 1.024233353 |
| -0.055933333 | 0.034533333 | 1.024225465 |
| -0.071033333 | 0.034466667 | 1.024178136 |
| 0.0769       | 0.034444444 | 1.024162361 |
| 0.015066667  | 0.0344      | 1.02413081  |
| 0.050466667  | 0.034377778 | 1.024115036 |
| 0.0789       | 0.034366667 | 1.024107148 |
| 0.030933333  | 0.034255556 | 1.024028278 |
| 0.0307       | 0.034244444 | 1.024020392 |
| 0.062966667  | 0.034233333 | 1.024012505 |
| 0.1715       | 0.034222222 | 1.024004618 |
| 0.021666667  | 0.034177778 | 1.023973073 |
| 0.151433333  | 0.034122222 | 1.023933642 |
| 0.221233333  | 0.034088889 | 1.023909985 |
| -0.035866667 | 0.034033333 | 1.023870557 |
| -0.0658      | 0.034011111 | 1.023854786 |
| -0.021766667 | 0.034       | 1.0238469   |
| -0.006433333 | 0.034       | 1.0238469   |
| -0.192333333 | 0.033988889 | 1.023839015 |
| 0.014333333  | 0.033922222 | 1.023791705 |
| 0.270933333  | 0.0339      | 1.023775935 |
| 0.0932       | 0.033888889 | 1.023768051 |
| -0.035833333 | 0.033877778 | 1.023760166 |
| -0.007666667 | 0.033811111 | 1.023712859 |
| -0.3719      | 0.033777778 | 1.023689207 |
| 0.098866667  | 0.033722222 | 1.023649787 |
| 0.284166667  | 0.033677778 | 1.023618252 |
| 0.060566667  | 0.033677778 | 1.023618252 |
| 0.0668       | 0.033655556 | 1.023602485 |
| 0.033066667  | 0.033611111 | 1.023570952 |
| 0.069966667  | 0.033611111 | 1.023570952 |
| -0.092666667 | 0.0336      | 1.023563069 |
| 0.0909       | 0.033588889 | 1.023555186 |
| 0.147666667  | 0.033588889 | 1.023555186 |

|              |             |             |
|--------------|-------------|-------------|
| 0.047266667  | 0.033588889 | 1.023555186 |
| -0.068333333 | 0.033577778 | 1.023547303 |
| -0.1632      | 0.033544444 | 1.023523654 |
| -0.1345      | 0.033488889 | 1.023484241 |
| -0.026033333 | 0.033466667 | 1.023468476 |
| -0.057966667 | 0.033411111 | 1.023429065 |
| 0.039733333  | 0.0334      | 1.023421183 |
| 0.051966667  | 0.033366667 | 1.023397537 |
| -0.053733333 | 0.033355556 | 1.023389655 |
| 0.004666667  | 0.033322222 | 1.02336601  |
| 0.179433333  | 0.033288889 | 1.023342366 |
| -0.042433333 | 0.033288889 | 1.023342366 |
| 0.010366667  | 0.033288889 | 1.023342366 |
| 0.1702       | 0.033222222 | 1.023295079 |
| -0.082433333 | 0.033211111 | 1.023287197 |
| 0.111766667  | 0.0332      | 1.023279317 |
| -0.015233333 | 0.033177778 | 1.023263555 |
| -0.11        | 0.033166667 | 1.023255674 |
| -0.1156      | 0.033166667 | 1.023255674 |
| 0.042833333  | 0.033155556 | 1.023247793 |
| 0.061533333  | 0.033144444 | 1.023239913 |
| -0.024466667 | 0.033144444 | 1.023239913 |
| 0.011366667  | 0.033122222 | 1.023224152 |
| 0.056633333  | 0.0331      | 1.023208391 |
| -0.2662      | 0.033088889 | 1.02320051  |
| 0.0753       | 0.033088889 | 1.02320051  |
| -0.063033333 | 0.033       | 1.02313747  |
| 0.138966667  | 0.032977778 | 1.02312171  |
| -0.4751      | 0.032911111 | 1.023074433 |
| 0.129966667  | 0.032877778 | 1.023050795 |
| 0.142266667  | 0.032877778 | 1.023050795 |
| -0.007166667 | 0.032755556 | 1.022964128 |
| -0.003666667 | 0.032733333 | 1.022948371 |
| 0.134        | 0.032566667 | 1.022830202 |
| 0.110266667  | 0.032555556 | 1.022822325 |
| -0.062433333 | 0.032555556 | 1.022822325 |
| 0.0137       | 0.032511111 | 1.022790816 |
| -0.1599      | 0.0325      | 1.022782939 |
| 0.139066667  | 0.032433333 | 1.022735677 |
| -0.026466667 | 0.032433333 | 1.022735677 |
| -0.0703      | 0.032344444 | 1.022672665 |
| -0.0111      | 0.032333333 | 1.022664789 |
| -0.089733333 | 0.032322222 | 1.022656913 |
| -0.126066667 | 0.032288889 | 1.022633285 |
| -0.073233333 | 0.032255556 | 1.022609657 |
| -0.050133333 | 0.032222222 | 1.02258603  |
| -0.021066667 | 0.032222222 | 1.02258603  |

|              |             |             |
|--------------|-------------|-------------|
| 0.0097       | 0.032222222 | 1.02258603  |
| -0.1261      | 0.032177778 | 1.022554528 |
| -0.143266667 | 0.032166667 | 1.022546653 |
| 0.091433333  | 0.032155556 | 1.022538778 |
| -0.1314      | 0.032133333 | 1.022523027 |
| -0.0799      | 0.032111111 | 1.022507277 |
| -0.025333333 | 0.032088889 | 1.022491528 |
| -0.063233333 | 0.032022222 | 1.022444279 |
| 0.007        | 0.032011111 | 1.022436405 |
| 0.1603       | 0.032011111 | 1.022436405 |
| -0.056266667 | 0.032       | 1.022428531 |
| -0.0792      | 0.0319      | 1.022357664 |
| -0.216866667 | 0.031844444 | 1.022318295 |
| -0.010433333 | 0.031822222 | 1.022302548 |
| -0.093766667 | 0.031777778 | 1.022271055 |
| 0.072066667  | 0.031744444 | 1.022247436 |
| 0.227766667  | 0.031722222 | 1.02223169  |
| -0.0911      | 0.031655556 | 1.022184454 |
| 0.054966667  | 0.031622222 | 1.022160837 |
| -0.017466667 | 0.0316      | 1.022145093 |
| -0.134366667 | 0.031533333 | 1.02209786  |
| 0.082133333  | 0.031488889 | 1.022066374 |
| 0.017566667  | 0.031422222 | 1.022019145 |
| -0.043666667 | 0.031411111 | 1.022011274 |
| 0.289233333  | 0.0314      | 1.022003403 |
| -0.0302      | 0.031355556 | 1.021971919 |
| -0.009133333 | 0.031322222 | 1.021948307 |
| -0.0873      | 0.031277778 | 1.021916825 |
| 0.020633333  | 0.031255556 | 1.021901084 |
| -0.1479      | 0.031233333 | 1.021885343 |
| -0.035433333 | 0.031211111 | 1.021869603 |
| 0.111633333  | 0.031166667 | 1.021838123 |
| -0.015233333 | 0.031111111 | 1.021798775 |
| 0.097733333  | 0.031111111 | 1.021798775 |
| -0.023566667 | 0.0311      | 1.021790905 |
| -0.0538      | 0.031044444 | 1.021751559 |
| -0.104133333 | 0.031033333 | 1.02174369  |
| 0.112833333  | 0.031033333 | 1.02174369  |
| 0.0788       | 0.030955556 | 1.021688608 |
| 0.1489       | 0.030955556 | 1.021688608 |
| 0.040233333  | 0.030922222 | 1.021665002 |
| -0.179766667 | 0.030911111 | 1.021657133 |
| -0.102133333 | 0.030866667 | 1.02162566  |
| 0.051233333  | 0.030866667 | 1.02162566  |
| 0.038766667  | 0.030811111 | 1.02158632  |
| -0.008566667 | 0.0308      | 1.021578452 |
| 0.007266667  | 0.0307      | 1.021507644 |

|              |             |             |
|--------------|-------------|-------------|
| 0.0456       | 0.030688889 | 1.021499777 |
| 0.034433333  | 0.030688889 | 1.021499777 |
| 0.126233333  | 0.030622222 | 1.021452575 |
| 0.075366667  | 0.030611111 | 1.021444708 |
| 0.0209       | 0.030611111 | 1.021444708 |
| -0.1116      | 0.030611111 | 1.021444708 |
| 0.0535       | 0.030611111 | 1.021444708 |
| 0.124866667  | 0.030588889 | 1.021428974 |
| 0.047066667  | 0.030544444 | 1.021397508 |
| -0.049333333 | 0.0305      | 1.021366043 |
| 0.031933333  | 0.030488889 | 1.021358177 |
| -0.0896      | 0.030466667 | 1.021342445 |
| 0.039033333  | 0.030422222 | 1.021310981 |
| 0.115366667  | 0.030422222 | 1.021310981 |
| 0.000566667  | 0.030377778 | 1.021279518 |
| -0.101433333 | 0.030344444 | 1.021255922 |
| -0.046866667 | 0.030322222 | 1.021240192 |
| 0.011066667  | 0.030277778 | 1.021208731 |
| -0.0602      | 0.030255556 | 1.021193001 |
| 0.095166667  | 0.0301      | 1.021082899 |
| 0.0268       | 0.030088889 | 1.021075035 |
| 0.0043       | 0.030077778 | 1.021067171 |
| -0.0245      | 0.030066667 | 1.021059308 |
| 0.0095       | 0.030044444 | 1.02104358  |
| -0.0464      | 0.030033333 | 1.021035716 |
| 0.0728       | 0.030011111 | 1.021019989 |
| -0.116633333 | 0.029966667 | 1.020988536 |
| -0.2328      | 0.029944444 | 1.020972809 |
| -0.0551      | 0.029944444 | 1.020972809 |
| 0.055866667  | 0.029933333 | 1.020964946 |
| 0.209266667  | 0.029844444 | 1.020902043 |
| 0.013933333  | 0.029833333 | 1.020894181 |
| 0.1076       | 0.029811111 | 1.020878456 |
| 0.057433333  | 0.029766667 | 1.020847006 |
| -0.030833333 | 0.029633333 | 1.020752664 |
| -0.027066667 | 0.029611111 | 1.020736942 |
| 0.4356       | 0.029611111 | 1.020736942 |
| 0.061466667  | 0.029544444 | 1.020689775 |
| 0.032633333  | 0.029533333 | 1.020681914 |
| 0.0695       | 0.029522222 | 1.020674053 |
| -0.069866667 | 0.029488889 | 1.02065047  |
| -0.010466667 | 0.029477778 | 1.02064261  |
| 0.067366667  | 0.029477778 | 1.02064261  |
| -0.030533333 | 0.029444444 | 1.020619028 |
| 0.006133333  | 0.0294      | 1.020587587 |
| 0.020566667  | 0.029377778 | 1.020571867 |
| -0.1402      | 0.029366667 | 1.020564007 |



|              |             |             |
|--------------|-------------|-------------|
| -0.068133333 | 0.0293      | 1.020516848 |
| -0.031766667 | 0.0292      | 1.020446113 |
| 0.146166667  | 0.0292      | 1.020446113 |
| 0.045        | 0.029188889 | 1.020438254 |
| -0.1379      | 0.029144444 | 1.020406819 |
| -0.0806      | 0.029022222 | 1.020320375 |
| -0.016133333 | 0.029022222 | 1.020320375 |
| -0.016966667 | 0.029       | 1.020304659 |
| 0.100133333  | 0.028988889 | 1.020296801 |
| 0.0226       | 0.028955556 | 1.020273228 |
| 0.003733333  | 0.028922222 | 1.020249655 |
| -0.0199      | 0.028844444 | 1.020194653 |
| -0.121866667 | 0.028822222 | 1.020178939 |
| 0.037666667  | 0.028766667 | 1.020139654 |
| 0.031166667  | 0.0287      | 1.020092515 |
| 0.1253       | 0.028688889 | 1.020084659 |
| 0.0146       | 0.028677778 | 1.020076802 |
| 0.0923       | 0.028644444 | 1.020053234 |
| 0.0238       | 0.028611111 | 1.020029666 |
| -0.250166667 | 0.028588889 | 1.020013954 |
| 0.0467       | 0.028577778 | 1.020006098 |
| -0.096733333 | 0.028555556 | 1.019990387 |
| 0.0456       | 0.028488889 | 1.019943255 |
| -0.028266667 | 0.028444444 | 1.019911834 |
| -0.0904      | 0.028422222 | 1.019896124 |
| -0.008066667 | 0.028377778 | 1.019864705 |
| 0.061566667  | 0.028344444 | 1.019841142 |
| 0.091333333  | 0.028322222 | 1.019825433 |
| 0.088866667  | 0.028266667 | 1.019786162 |
| 0.114266667  | 0.028222222 | 1.019754746 |
| 0.045066667  | 0.028222222 | 1.019754746 |
| 0.007766667  | 0.028166667 | 1.019715478 |
| -0.0932      | 0.028166667 | 1.019715478 |
| 0.0733       | 0.028155556 | 1.019707625 |
| 0.091366667  | 0.028077778 | 1.019652652 |
| 0.070233333  | 0.028077778 | 1.019652652 |
| -0.1328      | 0.028044444 | 1.019629094 |
| 0.013666667  | 0.028044444 | 1.019629094 |
| 0.0571       | 0.028011111 | 1.019605536 |
| 0.161833333  | 0.027955556 | 1.019566273 |
| 0.117266667  | 0.027844444 | 1.019487753 |
| 0.151833333  | 0.027844444 | 1.019487753 |
| 0.2803       | 0.027833333 | 1.019479901 |
| -0.022866667 | 0.027788889 | 1.019448495 |
| 0.0302       | 0.027777778 | 1.019440644 |
| 0.0426       | 0.027744444 | 1.01941709  |
| -0.1445      | 0.027744444 | 1.01941709  |

|              |             |             |
|--------------|-------------|-------------|
| -0.0313      | 0.027722222 | 1.019401388 |
| -0.0715      | 0.0277      | 1.019385686 |
| 0.047533333  | 0.027666667 | 1.019362133 |
| -0.105133333 | 0.027644444 | 1.019346432 |
| 0.028333333  | 0.027622222 | 1.019330731 |
| 0.032066667  | 0.027522222 | 1.019260078 |
| -0.0187      | 0.027522222 | 1.019260078 |
| 0.028766667  | 0.027444444 | 1.01920513  |
| 0.0855       | 0.027422222 | 1.019189431 |
| 1.00E-04     | 0.027411111 | 1.019181582 |
| 0.050033333  | 0.027388889 | 1.019165883 |
| 0.057366667  | 0.027355556 | 1.019142336 |
| 0.283133333  | 0.027244444 | 1.019063848 |
| 0.100566667  | 0.027222222 | 1.019048151 |
| 0.102633333  | 0.0272      | 1.019032455 |
| -0.264366667 | 0.027155556 | 1.019001062 |
| 0.029566667  | 0.027077778 | 1.018946128 |
| 0.035033333  | 0.027044444 | 1.018922586 |
| -0.378433333 | 0.027033333 | 1.018914738 |
| -0.136       | 0.027022222 | 1.018906891 |
| -0.0638      | 0.027022222 | 1.018906891 |
| 0.1982       | 0.027011111 | 1.018899044 |
| 0.136566667  | 0.026966667 | 1.018867656 |
| 0.0235       | 0.026955556 | 1.018859809 |
| 0.0479       | 0.026944444 | 1.018851962 |
| 0.148633333  | 0.026944444 | 1.018851962 |
| -0.017766667 | 0.026888889 | 1.018812728 |
| 0.046033333  | 0.026833333 | 1.018773496 |
| 0.098        | 0.026822222 | 1.01876565  |
| 0.0594       | 0.0268      | 1.018749958 |
| -0.0434      | 0.026777778 | 1.018734266 |
| 0.193266667  | 0.026755556 | 1.018718574 |
| 0.0078       | 0.026755556 | 1.018718574 |
| -0.078466667 | 0.026711111 | 1.018687192 |
| -0.051066667 | 0.026711111 | 1.018687192 |
| -0.042166667 | 0.026677778 | 1.018663655 |
| -0.076166667 | 0.026622222 | 1.018624429 |
| 0.124866667  | 0.026544444 | 1.018569515 |
| -0.080133333 | 0.026488889 | 1.018530293 |
| -0.0981      | 0.026466667 | 1.018514604 |
| 0.048033333  | 0.026444444 | 1.018498916 |
| 0.029033333  | 0.026366667 | 1.018444008 |
| 0.109366667  | 0.026355556 | 1.018436165 |
| 0.0505       | 0.026322222 | 1.018412634 |
| 0.0412       | 0.026288889 | 1.018389104 |
| -0.134033333 | 0.026277778 | 1.018381261 |
| -0.100333333 | 0.026255556 | 1.018365575 |

|              |             |             |
|--------------|-------------|-------------|
| -0.082966667 | 0.026222222 | 1.018342046 |
| -0.165766667 | 0.026177778 | 1.018310675 |
| 0.060133333  | 0.026166667 | 1.018302832 |
| 0.129333333  | 0.026133333 | 1.018279304 |
| -0.012633333 | 0.026066667 | 1.018232251 |
| 0.010333333  | 0.026011111 | 1.018193041 |
| -0.178933333 | 0.026       | 1.0181852   |
| 0.080966667  | 0.025988889 | 1.018177358 |
| 0.0325       | 0.025977778 | 1.018169517 |
| -0.0738      | 0.025955556 | 1.018153833 |
| -0.134466667 | 0.025944444 | 1.018145992 |
| 0.063733333  | 0.025944444 | 1.018145992 |
| 0.096633333  | 0.025922222 | 1.018130309 |
| 0.116266667  | 0.025911111 | 1.018122468 |
| 0.061633333  | 0.0259      | 1.018114627 |
| 0.030233333  | 0.025888889 | 1.018106786 |
| -0.036033333 | 0.025788889 | 1.018036219 |
| 0.1263       | 0.025788889 | 1.018036219 |
| 0.0087       | 0.025766667 | 1.018020538 |
| 0.004233333  | 0.025755556 | 1.018012697 |
| -0.0875      | 0.025744444 | 1.018004857 |
| 0.032366667  | 0.025722222 | 1.017989176 |
| -0.141933333 | 0.025722222 | 1.017989176 |
| 0.006433333  | 0.0257      | 1.017973496 |
| 0.002966667  | 0.025666667 | 1.017949976 |
| -0.223433333 | 0.025622222 | 1.017918617 |
| -0.040933333 | 0.025622222 | 1.017918617 |
| -0.017033333 | 0.025622222 | 1.017918617 |
| -0.012233333 | 0.025488889 | 1.017824546 |
| 0.0243       | 0.025455556 | 1.017801029 |
| 0.096633333  | 0.025444444 | 1.017793191 |
| 0.019533333  | 0.025433333 | 1.017785352 |
| 0.061066667  | 0.025366667 | 1.017738321 |
| -0.019466667 | 0.025355556 | 1.017730483 |
| -0.063966667 | 0.025255556 | 1.017659942 |
| -0.074366667 | 0.025233333 | 1.017644267 |
| -0.105966667 | 0.0252      | 1.017620755 |
| -0.0069      | 0.025177778 | 1.01760508  |
| -0.144233333 | 0.025177778 | 1.01760508  |
| 0.137266667  | 0.025166667 | 1.017597243 |
| 0.018666667  | 0.025166667 | 1.017597243 |
| 0.034266667  | 0.025122222 | 1.017565895 |
| -0.088866667 | 0.025111111 | 1.017558058 |
| 0.123266667  | 0.025077778 | 1.017534547 |
| -0.0572      | 0.025077778 | 1.017534547 |
| -0.067966667 | 0.025055556 | 1.017518874 |
| -0.027466667 | 0.025033333 | 1.017503201 |

|              |             |             |
|--------------|-------------|-------------|
| 0.1982       | 0.025033333 | 1.017503201 |
| 0.056133333  | 0.025022222 | 1.017495365 |
| 0.010133333  | 0.024988889 | 1.017471856 |
| -0.037366667 | 0.024922222 | 1.01742484  |
| 0.0174       | 0.024911111 | 1.017417004 |
| -0.145766667 | 0.024888889 | 1.017401333 |
| -0.031433333 | 0.0248      | 1.017338649 |
| 0.1632       | 0.024777778 | 1.017322979 |
| -0.0942      | 0.024744444 | 1.017299474 |
| 0.103166667  | 0.024722222 | 1.017283805 |
| -0.071733333 | 0.024588889 | 1.017189792 |
| 0.1278       | 0.024511111 | 1.017134955 |
| 0.1244       | 0.024488889 | 1.017119288 |
| -0.035       | 0.024466667 | 1.017103621 |
| -0.071566667 | 0.024444444 | 1.017087955 |
| -0.013833333 | 0.024411111 | 1.017064455 |
| 0.289966667  | 0.024322222 | 1.017001793 |
| -0.1602      | 0.024311111 | 1.01699396  |
| 0.011866667  | 0.0243      | 1.016986128 |
| 0.029633333  | 0.024166667 | 1.016892142 |
| 0.0547       | 0.0241      | 1.016845153 |
| 0.0522       | 0.023988889 | 1.016766842 |
| 0.071833333  | 0.023955556 | 1.01674335  |
| -0.0272      | 0.023944444 | 1.01673552  |
| 0.197933333  | 0.023944444 | 1.01673552  |
| -0.038166667 | 0.023922222 | 1.016719859 |
| -0.037933333 | 0.0239      | 1.016704198 |
| 0.094266667  | 0.0239      | 1.016704198 |
| 0.472266667  | 0.023888889 | 1.016696368 |
| 0.106933333  | 0.023866667 | 1.016680708 |
| -0.034966667 | 0.023866667 | 1.016680708 |
| 0.010066667  | 0.023844444 | 1.016665048 |
| 0.087233333  | 0.023811111 | 1.016641558 |
| -0.127       | 0.023688889 | 1.016555434 |
| 0.507466667  | 0.023666667 | 1.016539776 |
| -0.064933333 | 0.023644444 | 1.016524118 |
| 0.055066667  | 0.023644444 | 1.016524118 |
| 0.1145       | 0.023555556 | 1.016461488 |
| -0.066866667 | 0.023544444 | 1.01645366  |
| -0.097733333 | 0.023533333 | 1.016445832 |
| 0.037466667  | 0.023477778 | 1.016406691 |
| -0.0564      | 0.023466667 | 1.016398863 |
| -0.143866667 | 0.023433333 | 1.016375379 |
| 0.194266667  | 0.023366667 | 1.016328414 |
| 0.046733333  | 0.023366667 | 1.016328414 |
| 0.160366667  | 0.023366667 | 1.016328414 |
| -0.0928      | 0.023333333 | 1.016304932 |

|              |             |             |
|--------------|-------------|-------------|
| -0.091833333 | 0.023266667 | 1.01625797  |
| 0.022733333  | 0.023244444 | 1.016242316 |
| 0.106866667  | 0.0232      | 1.01621101  |
| 0.165766667  | 0.023177778 | 1.016195357 |
| 0.102366667  | 0.023177778 | 1.016195357 |
| -0.049133333 | 0.023166667 | 1.016187531 |
| 0.0643       | 0.023022222 | 1.016085794 |
| 0.023633333  | 0.023       | 1.016070143 |
| -0.1377      | 0.022955556 | 1.016038842 |
| 0.109133333  | 0.022855556 | 1.015968418 |
| 0.001133333  | 0.0228      | 1.015929296 |
| 0.034466667  | 0.022677778 | 1.015843232 |
| -0.043733333 | 0.022644444 | 1.015819761 |
| -0.039666667 | 0.022588889 | 1.015780644 |
| -0.044466667 | 0.022577778 | 1.015772821 |
| -0.042733333 | 0.022555556 | 1.015757175 |
| -0.132033333 | 0.022555556 | 1.015757175 |
| 0.130533333  | 0.022511111 | 1.015725884 |
| 0.086766667  | 0.0225      | 1.015718061 |
| 0.100266667  | 0.022444444 | 1.015678948 |
| 0.032366667  | 0.022433333 | 1.015671126 |
| 0.039566667  | 0.022388889 | 1.015639837 |
| -0.482966667 | 0.022377778 | 1.015632015 |
| 0.005233333  | 0.022344444 | 1.015608549 |
| -0.154266667 | 0.022333333 | 1.015600727 |
| 0.226866667  | 0.022311111 | 1.015585084 |
| -0.052466667 | 0.022277778 | 1.015561619 |
| -0.014633333 | 0.022211111 | 1.015514691 |
| 0.0505       | 0.022211111 | 1.015514691 |
| -0.174433333 | 0.022211111 | 1.015514691 |
| -0.015833333 | 0.022177778 | 1.015491228 |
| 0.017133333  | 0.022177778 | 1.015491228 |
| -0.0368      | 0.022166667 | 1.015483407 |
| -0.071566667 | 0.022166667 | 1.015483407 |
| -0.024833333 | 0.022133333 | 1.015459945 |
| 0.0847       | 0.022066667 | 1.015413022 |
| 0.056666667  | 0.022055556 | 1.015405202 |
| 0.074566667  | 0.022011111 | 1.015373921 |
| 0.080933333  | 0.022011111 | 1.015373921 |
| -0.145666667 | 0.022011111 | 1.015373921 |
| -0.037933333 | 0.021911111 | 1.015303543 |
| -0.008166667 | 0.021788889 | 1.015217532 |
| -0.008166667 | 0.021755556 | 1.015194076 |
| 0.098833333  | 0.021755556 | 1.015194076 |
| 0.1969       | 0.021722222 | 1.01517062  |
| -0.3414      | 0.021711111 | 1.015162802 |
| -0.011666667 | 0.021688889 | 1.015147165 |

|              |             |             |
|--------------|-------------|-------------|
| 0.0326       | 0.021677778 | 1.015139347 |
| 0.0544       | 0.021644444 | 1.015115892 |
| -6.67E-05    | 0.021455556 | 1.014982994 |
| 0.046333333  | 0.021422222 | 1.014959543 |
| 0.0812       | 0.021388889 | 1.014936093 |
| 0.044933333  | 0.021377778 | 1.014928276 |
| 0.012566667  | 0.021377778 | 1.014928276 |
| -0.149666667 | 0.021355556 | 1.014912643 |
| 0.188533333  | 0.021333333 | 1.01489701  |
| -0.118833333 | 0.021311111 | 1.014881378 |
| 0.040733333  | 0.021277778 | 1.014857929 |
| 0.109166667  | 0.021233333 | 1.014826666 |
| -0.062366667 | 0.021233333 | 1.014826666 |
| -0.0568      | 0.021211111 | 1.014811034 |
| -0.027133333 | 0.021177778 | 1.014787587 |
| 0.014266667  | 0.021144444 | 1.014764141 |
| 0.140933333  | 0.021122222 | 1.01474851  |
| -0.0996      | 0.021111111 | 1.014740695 |
| 0.0296       | 0.0211      | 1.01473288  |
| -0.107533333 | 0.021088889 | 1.014725065 |
| 0.029233333  | 0.021077778 | 1.01471725  |
| -0.0383      | 0.021077778 | 1.01471725  |
| -0.1         | 0.021044444 | 1.014693805 |
| 0.094633333  | 0.021033333 | 1.014685991 |
| -0.0376      | 0.021       | 1.014662547 |
| 0.0138       | 0.020988889 | 1.014654732 |
| -0.008366667 | 0.020966667 | 1.014639103 |
| 0.259833333  | 0.020944444 | 1.014623475 |
| 0.3202       | 0.020944444 | 1.014623475 |
| -0.128933333 | 0.020933333 | 1.01461566  |
| -0.086233333 | 0.020888889 | 1.014584404 |
| -0.065933333 | 0.020844444 | 1.014553149 |
| 0.125        | 0.020811111 | 1.014529708 |
| -0.154333333 | 0.020766667 | 1.014498454 |
| 0.022633333  | 0.020711111 | 1.014459388 |
| 0.0225       | 0.020666667 | 1.014428137 |
| -0.0663      | 0.020644444 | 1.014412511 |
| 0.094733333  | 0.020588889 | 1.014373449 |
| -0.111533333 | 0.020588889 | 1.014373449 |
| -0.081366667 | 0.020555556 | 1.014350012 |
| 0.269833333  | 0.020522222 | 1.014326576 |
| 0.0196       | 0.020511111 | 1.014318764 |
| 0.0689       | 0.020477778 | 1.014295329 |
| -0.033966667 | 0.020455556 | 1.014279705 |
| -0.0216      | 0.020411111 | 1.014248459 |
| 0.0682       | 0.0204      | 1.014240648 |
| -0.1095      | 0.020388889 | 1.014232837 |

|              |             |             |
|--------------|-------------|-------------|
| 0.106533333  | 0.0202      | 1.014100054 |
| -0.079466667 | 0.020166667 | 1.014076624 |
| 0.1329       | 0.020133333 | 1.014053194 |
| 0.132866667  | 0.020077778 | 1.014014145 |
| -0.042233333 | 0.020066667 | 1.014006336 |
| -0.0016      | 0.020044444 | 1.013990717 |
| 0.042433333  | 0.020011111 | 1.013967289 |
| 0.015266667  | 0.019855556 | 1.013857966 |
| -0.074833333 | 0.019844444 | 1.013850158 |
| 0.022633333  | 0.019788889 | 1.013811117 |
| -0.132566667 | 0.019766667 | 1.013795501 |
| -0.0019      | 0.019722222 | 1.01376427  |
| -0.172666667 | 0.019688889 | 1.013740847 |
| 0.0836       | 0.019688889 | 1.013740847 |
| 0.199033333  | 0.019655556 | 1.013717425 |
| 0.018233333  | 0.019611111 | 1.013686197 |
| 0.063066667  | 0.019577778 | 1.013662776 |
| -0.064366667 | 0.019533333 | 1.013631549 |
| 0.020033333  | 0.019522222 | 1.013623742 |
| 0.0773       | 0.019488889 | 1.013600323 |
| 0.167933333  | 0.019444444 | 1.013569098 |
| -0.071366667 | 0.019444444 | 1.013569098 |
| 0.0783       | 0.0194      | 1.013537874 |
| 0.0997       | 0.019266667 | 1.013444207 |
| -0.100733333 | 0.0192      | 1.013397377 |
| 0.1885       | 0.0192      | 1.013397377 |
| -0.1295      | 0.019133333 | 1.013350549 |
| 0.1173       | 0.019055556 | 1.01329592  |
| -0.0833      | 0.019055556 | 1.01329592  |
| -0.0604      | 0.018988889 | 1.013249096 |
| -0.092666667 | 0.018977778 | 1.013241293 |
| -0.1951      | 0.018922222 | 1.013202275 |
| 0.085433333  | 0.018866667 | 1.01316326  |
| 0.0154       | 0.018844444 | 1.013147654 |
| 0.1539       | 0.018844444 | 1.013147654 |
| -0.166533333 | 0.018788889 | 1.01310864  |
| 0.0963       | 0.018733333 | 1.013069628 |
| 0.114933333  | 0.018722222 | 1.013061826 |
| -0.030633333 | 0.0187      | 1.013046221 |
| -0.109       | 0.018677778 | 1.013030617 |
| 0.0756       | 0.018677778 | 1.013030617 |
| 0.081066667  | 0.018666667 | 1.013022815 |
| 0.111633333  | 0.018644444 | 1.013007211 |
| -0.073966667 | 0.018566667 | 1.0129526   |
| 0.019033333  | 0.018533333 | 1.012929196 |
| 0.0331       | 0.0185      | 1.012905793 |
| -0.066766667 | 0.018488889 | 1.012897992 |

|              |             |             |
|--------------|-------------|-------------|
| -0.029466667 | 0.018455556 | 1.012874589 |
| 0.044        | 0.018433333 | 1.012858988 |
| -0.135633333 | 0.018422222 | 1.012851187 |
| -0.123433333 | 0.018422222 | 1.012851187 |
| 0.064        | 0.018377778 | 1.012819985 |
| 0.085166667  | 0.018377778 | 1.012819985 |
| -0.052966667 | 0.018366667 | 1.012812185 |
| -0.045066667 | 0.018266667 | 1.012741985 |
| 0.2593       | 0.018266667 | 1.012741985 |
| -0.071166667 | 0.018188889 | 1.012687388 |
| 0.1378       | 0.018188889 | 1.012687388 |
| 0.1152       | 0.018166667 | 1.012671789 |
| -0.012366667 | 0.018166667 | 1.012671789 |
| -0.013433333 | 0.018144444 | 1.012656191 |
| 0.1678       | 0.018133333 | 1.012648392 |
| 0.228833333  | 0.018088889 | 1.012617196 |
| 0.001733333  | 0.018066667 | 1.012601598 |
| -0.1218      | 0.018066667 | 1.012601598 |
| 0.322166667  | 0.018055556 | 1.0125938   |
| 0.036        | 0.018       | 1.012554807 |
| 0.070966667  | 0.017966667 | 1.012531413 |
| -0.0506      | 0.017966667 | 1.012531413 |
| 0.1319       | 0.017944444 | 1.012515816 |
| -0.1124      | 0.017944444 | 1.012515816 |
| -0.032233333 | 0.017933333 | 1.012508018 |
| -0.0317      | 0.0179      | 1.012484625 |
| -0.001733333 | 0.0179      | 1.012484625 |
| 0.0353       | 0.017855556 | 1.012453434 |
| -0.016066667 | 0.017855556 | 1.012453434 |
| 0.098666667  | 0.017844444 | 1.012445637 |
| 0.007033333  | 0.017822222 | 1.012430042 |
| -0.069866667 | 0.0178      | 1.012414447 |
| -0.369633333 | 0.017788889 | 1.01240665  |
| -0.112933333 | 0.017788889 | 1.01240665  |
| -0.147033333 | 0.017755556 | 1.012383259 |
| 0.2162       | 0.017744444 | 1.012375462 |
| 0.011333333  | 0.017688889 | 1.012336478 |
| 0.029633333  | 0.017677778 | 1.012328681 |
| 0.211966667  | 0.017655556 | 1.012313088 |
| 0.257166667  | 0.017588889 | 1.012266631 |
| 0.144266667  | 0.017566667 | 1.012250718 |
| -0.004166667 | 0.017555556 | 1.012242922 |
| 0.025766667  | 0.017555556 | 1.012242922 |
| 0.1604       | 0.017477778 | 1.012188352 |
| 0.035633333  | 0.017477778 | 1.012188352 |
| 0.0528       | 0.017477778 | 1.012188352 |
| -0.091133333 | 0.017466667 | 1.012180557 |



|              |             |             |
|--------------|-------------|-------------|
| -0.1715      | 0.017433333 | 1.012157171 |
| 0.056066667  | 0.0174      | 1.012133785 |
| 0.117233333  | 0.017377778 | 1.012118195 |
| 0.147133333  | 0.017322222 | 1.012079221 |
| 0.207733333  | 0.0173      | 1.012063632 |
| 0.069666667  | 0.017233333 | 1.012016866 |
| 0.051933333  | 0.017222222 | 1.012009072 |
| 0.1208       | 0.017177778 | 1.011977895 |
| 0.007333333  | 0.017166667 | 1.011970102 |
| -0.0164      | 0.017155556 | 1.011962308 |
| 0.141666667  | 0.017144444 | 1.011954514 |
| -0.192766667 | 0.017133333 | 1.01194672  |
| 0.171633333  | 0.017133333 | 1.01194672  |
| -0.039666667 | 0.017111111 | 1.011931133 |
| 0.121033333  | 0.017055556 | 1.011892166 |
| -0.0449      | 0.016944444 | 1.011814237 |
| 0.102033333  | 0.016911111 | 1.01179086  |
| 0.124666667  | 0.016811111 | 1.01172073  |
| 0.2012       | 0.016811111 | 1.01172073  |
| -0.051533333 | 0.016744444 | 1.01167398  |
| 0.029533333  | 0.016744444 | 1.01167398  |
| -0.043033333 | 0.016733333 | 1.011666188 |
| 0.111433333  | 0.016711111 | 1.011650605 |
| 0.0245       | 0.016655556 | 1.011611649 |
| -0.0609      | 0.016655556 | 1.011611649 |
| -0.069133333 | 0.016633333 | 1.011596067 |
| 0.052666667  | 0.016488889 | 1.01149479  |
| 0.060866667  | 0.016488889 | 1.01149479  |
| 0.239166667  | 0.016466667 | 1.01147921  |
| -0.1027      | 0.016433333 | 1.01145584  |
| 0.0783       | 0.0163      | 1.011362366 |
| 0.010266667  | 0.016277778 | 1.011346788 |
| -0.274033333 | 0.016233333 | 1.011315632 |
| -0.0312      | 0.016122222 | 1.011237747 |
| 0.082333333  | 0.016077778 | 1.011206595 |
| 0.057        | 0.016044444 | 1.011183231 |
| 0.1273       | 0.016044444 | 1.011183231 |
| -0.1957      | 0.015966667 | 1.011128719 |
| 0.012        | 0.015955556 | 1.011120931 |
| 0.059333333  | 0.015933333 | 1.011105357 |
| -0.0003      | 0.015933333 | 1.011105357 |
| 0.129833333  | 0.015788889 | 1.011004129 |
| -0.058266667 | 0.015777778 | 1.010996342 |
| 0.171966667  | 0.015688889 | 1.010934054 |
| -0.090966667 | 0.015688889 | 1.010934054 |
| 0.023166667  | 0.015644444 | 1.010902911 |
| 0.27         | 0.015644444 | 1.010902911 |

|              |             |             |
|--------------|-------------|-------------|
| 0.0328       | 0.015633333 | 1.010895125 |
| -0.103766667 | 0.015622222 | 1.01088734  |
| -0.264166667 | 0.015588889 | 1.010863983 |
| -0.006933333 | 0.015577778 | 1.010856198 |
| 0.101266667  | 0.015566667 | 1.010848413 |
| -0.114066667 | 0.015544444 | 1.010832843 |
| 0.073033333  | 0.015477778 | 1.010786133 |
| -0.051       | 0.015433333 | 1.010754995 |
| 0.065733333  | 0.015433333 | 1.010754995 |
| 0.021466667  | 0.015422222 | 1.010747211 |
| 0.070666667  | 0.0154      | 1.010731642 |
| -0.199933333 | 0.0153      | 1.010661586 |
| -0.001533333 | 0.015288889 | 1.010653802 |
| 0.114433333  | 0.015288889 | 1.010653802 |
| -0.092133333 | 0.015222222 | 1.010607101 |
| 0.0151       | 0.0152      | 1.010591535 |
| -0.127333333 | 0.015177778 | 1.010575968 |
| 0.079133333  | 0.015144444 | 1.010552619 |
| -0.0228      | 0.014988889 | 1.010443664 |
| 0.043633333  | 0.014955556 | 1.010420318 |
| -0.029166667 | 0.014944444 | 1.010412537 |
| -0.2331      | 0.014877778 | 1.010365847 |
| -0.084133333 | 0.014877778 | 1.010365847 |
| 0.132033333  | 0.014822222 | 1.01032694  |
| 0.052        | 0.014788889 | 1.010303597 |
| 0.033166667  | 0.014788889 | 1.010303597 |
| 0.072166667  | 0.014733333 | 1.010264693 |
| -0.075633333 | 0.014733333 | 1.010264693 |
| 0.171033333  | 0.014644444 | 1.010202449 |
| 0.0672       | 0.014588889 | 1.010163549 |
| 0.095266667  | 0.014466667 | 1.010077973 |
| 0.104066667  | 0.014455556 | 1.010070194 |
| 0.0875       | 0.014411111 | 1.010039078 |
| 0.039433333  | 0.014388889 | 1.01002352  |
| 0.076133333  | 0.014377778 | 1.010015741 |
| 0.051033333  | 0.014322222 | 1.009976848 |
| -0.0289      | 0.014311111 | 1.00996907  |
| -0.122       | 0.014266667 | 1.009937957 |
| -0.141933333 | 0.014255556 | 1.009930178 |
| 0.3646       | 0.014255556 | 1.009930178 |
| 0.185966667  | 0.014222222 | 1.009906844 |
| 0.044533333  | 0.014133333 | 1.009844623 |
| -0.1063      | 0.014088889 | 1.009813513 |
| 0.046333333  | 0.014066667 | 1.009797959 |
| 0.049133333  | 0.014055556 | 1.009790182 |
| -0.205866667 | 0.014044444 | 1.009782405 |
| 0.129466667  | 0.013988889 | 1.009743521 |

|              |             |             |
|--------------|-------------|-------------|
| 0.055433333  | 0.013933333 | 1.009704638 |
| -0.049133333 | 0.013933333 | 1.009704638 |
| -0.080333333 | 0.013888889 | 1.009673533 |
| -0.104766667 | 0.013833333 | 1.009634653 |
| -0.005866667 | 0.0138      | 1.009611326 |
| 0.1039       | 0.0138      | 1.009611326 |
| 0.0529       | 0.0138      | 1.009611326 |
| 0.067633333  | 0.013677778 | 1.009525797 |
| -0.190133333 | 0.013644444 | 1.009502473 |
| -0.016466667 | 0.013611111 | 1.009479149 |
| 0.010133333  | 0.013566667 | 1.00944805  |
| 0.035        | 0.013544444 | 1.009432502 |
| -0.148233333 | 0.013522222 | 1.009416953 |
| -0.065866667 | 0.013444444 | 1.009362536 |
| -0.034933333 | 0.013433333 | 1.009354762 |
| -0.018666667 | 0.013388889 | 1.009323668 |
| 0.1222       | 0.013355556 | 1.009300348 |
| -0.015466667 | 0.013344444 | 1.009292574 |
| 0.005066667  | 0.0133      | 1.009261482 |
| -0.073466667 | 0.013288889 | 1.009253709 |
| -0.178766667 | 0.013277778 | 1.009245936 |
| 0.235166667  | 0.013244444 | 1.009222618 |
| 0.133        | 0.013233333 | 1.009214845 |
| -0.0717      | 0.013177778 | 1.009175983 |
| 0.106833333  | 0.013166667 | 1.009168211 |
| 0.033533333  | 0.013166667 | 1.009168211 |
| 0.0344       | 0.013155556 | 1.009160439 |
| -0.026466667 | 0.013144444 | 1.009152666 |
| -0.008533333 | 0.013122222 | 1.009137122 |
| 0.150533333  | 0.013088889 | 1.009113807 |
| 0.0483       | 0.013077778 | 1.009106035 |
| 0.040066667  | 0.013       | 1.009051634 |
| -0.0857      | 0.012988889 | 1.009043863 |
| 0.104333333  | 0.012922222 | 1.008997236 |
| -0.030433333 | 0.012911111 | 1.008989465 |
| 0.0323       | 0.012888889 | 1.008973923 |
| 0.033733333  | 0.012822222 | 1.0089273   |
| -0.161133333 | 0.012755556 | 1.008880679 |
| 0.049233333  | 0.012688889 | 1.00883406  |
| 0.041466667  | 0.012655556 | 1.008810751 |
| 0.177666667  | 0.012644444 | 1.008802981 |
| 0.033933333  | 0.012588889 | 1.008764135 |
| 0.2277       | 0.012588889 | 1.008764135 |
| 0.016133333  | 0.012577778 | 1.008756366 |
| 0.074566667  | 0.012577778 | 1.008756366 |
| 0.154933333  | 0.012544444 | 1.008733059 |
| -0.056666667 | 0.012544444 | 1.008733059 |

|              |             |             |
|--------------|-------------|-------------|
| 0.213766667  | 0.012544444 | 1.008733059 |
| -0.027866667 | 0.012522222 | 1.008717521 |
| -0.0344      | 0.012444444 | 1.008663141 |
| 0.1991       | 0.012422222 | 1.008647605 |
| 0.320233333  | 0.012288889 | 1.00855439  |
| -0.101566667 | 0.012266667 | 1.008538855 |
| -0.1138      | 0.012166667 | 1.008468951 |
| -0.0451      | 0.012055556 | 1.008391285 |
| -0.0324      | 0.012044444 | 1.008383519 |
| -0.072166667 | 0.012       | 1.008352455 |
| -0.036533333 | 0.011955556 | 1.008321392 |
| 0.005933333  | 0.011911111 | 1.008290329 |
| -0.103966667 | 0.011911111 | 1.008290329 |
| 0.060833333  | 0.011844444 | 1.008243737 |
| 0.0295       | 0.011822222 | 1.008228207 |
| 0.2213       | 0.011822222 | 1.008228207 |
| -0.010633333 | 0.011788889 | 1.008204912 |
| -0.0527      | 0.011788889 | 1.008204912 |
| -0.078566667 | 0.011777778 | 1.008197148 |
| -0.090933333 | 0.011711111 | 1.00815056  |
| -0.033866667 | 0.0117      | 1.008142796 |
| 0.1079       | 0.0117      | 1.008142796 |
| -0.146633333 | 0.011588889 | 1.008065155 |
| -0.114033333 | 0.011577778 | 1.008057391 |
| 0.099833333  | 0.011577778 | 1.008057391 |
| -0.059733333 | 0.011533333 | 1.008026337 |
| 0.027966667  | 0.011511111 | 1.00801081  |
| -0.029733333 | 0.011488889 | 1.007995284 |
| 0.013066667  | 0.011477778 | 1.007987521 |
| 0.084133333  | 0.011477778 | 1.007987521 |
| 0.045633333  | 0.011466667 | 1.007979758 |
| 0.066766667  | 0.011433333 | 1.007956469 |
| 0.1688       | 0.011411111 | 1.007940943 |
| 0.0637       | 0.011388889 | 1.007925417 |
| 0.178        | 0.011311111 | 1.00787108  |
| -0.129166667 | 0.011277778 | 1.007847794 |
| 0.1124       | 0.011266667 | 1.007840032 |
| 0.170766667  | 0.011266667 | 1.007840032 |
| -0.110066667 | 0.011266667 | 1.007840032 |
| 0.051433333  | 0.011244444 | 1.007824508 |
| 0.385466667  | 0.011233333 | 1.007816746 |
| -0.514666667 | 0.011233333 | 1.007816746 |
| 0.075966667  | 0.011166667 | 1.007770176 |
| -0.04        | 0.011155556 | 1.007762414 |
| 0.018866667  | 0.011133333 | 1.007746892 |
| -0.052333333 | 0.011111111 | 1.007731369 |
| 0.065633333  | 0.0111      | 1.007723608 |

|              |             |             |
|--------------|-------------|-------------|
| -0.095033333 | 0.011044444 | 1.007684803 |
| 0.171733333  | 0.010888889 | 1.007576158 |
| 0.052533333  | 0.010888889 | 1.007576158 |
| 0.040566667  | 0.010888889 | 1.007576158 |
| -0.151066667 | 0.010877778 | 1.007568398 |
| -0.016233333 | 0.010788889 | 1.00750632  |
| 0.132933333  | 0.010788889 | 1.00750632  |
| 0.0592       | 0.010733333 | 1.007467524 |
| 0.037233333  | 0.010688889 | 1.007436488 |
| -0.051833333 | 0.0106      | 1.007374418 |
| -0.0326      | 0.0106      | 1.007374418 |
| -0.102966667 | 0.010433333 | 1.007258048 |
| 0.214266667  | 0.010422222 | 1.007250291 |
| 0.042333333  | 0.010411111 | 1.007242534 |
| 0.13         | 0.010388889 | 1.007227019 |
| -0.018166667 | 0.010377778 | 1.007219262 |
| -0.084166667 | 0.010322222 | 1.007180476 |
| 0.053633333  | 0.010322222 | 1.007180476 |
| -0.0514      | 0.0103      | 1.007164962 |
| -0.0748      | 0.010288889 | 1.007157206 |
| 0.076966667  | 0.010277778 | 1.007149449 |
| -0.009566667 | 0.010266667 | 1.007141692 |
| -0.065       | 0.010255556 | 1.007133936 |
| -0.031966667 | 0.010244444 | 1.007126179 |
| -0.007066667 | 0.010177778 | 1.007079641 |
| -0.002433333 | 0.010177778 | 1.007079641 |
| -0.016966667 | 0.010144444 | 1.007056373 |
| 0.154666667  | 0.010111111 | 1.007033105 |
| -0.046733333 | 0.010077778 | 1.007009838 |
| 0.0348       | 0.009944444 | 1.006916775 |
| 0.086733333  | 0.009944444 | 1.006916775 |
| 0.028633333  | 0.009911111 | 1.00689351  |
| -0.009066667 | 0.009877778 | 1.006870246 |
| 0.047166667  | 0.009866667 | 1.006862492 |
| 0.213633333  | 0.009866667 | 1.006862492 |
| -0.0864      | 0.009811111 | 1.00682372  |
| -0.0167      | 0.0098      | 1.006815966 |
| 0.002733333  | 0.009766667 | 1.006792704 |
| -0.0271      | 0.009733333 | 1.006769442 |
| -0.0918      | 0.009722222 | 1.006761689 |
| -0.145966667 | 0.0097      | 1.006746181 |
| -0.198433333 | 0.0097      | 1.006746181 |
| 0.1591       | 0.009688889 | 1.006738428 |
| 0.256        | 0.009677778 | 1.006730674 |
| -0.069433333 | 0.009666667 | 1.006722921 |
| 0.117233333  | 0.009655556 | 1.006715167 |
| -0.419433333 | 0.009633333 | 1.006699661 |

|              |             |             |
|--------------|-------------|-------------|
| -0.183566667 | 0.009622222 | 1.006691908 |
| -0.0315      | 0.009566667 | 1.006653143 |
| -0.0131      | 0.009455556 | 1.006575617 |
| 0.012366667  | 0.009444444 | 1.006567864 |
| -0.091566667 | 0.009422222 | 1.00655236  |
| 0.2149       | 0.0094      | 1.006536856 |
| -0.490033333 | 0.009366667 | 1.0065136   |
| 0.014233333  | 0.009355556 | 1.006505849 |
| -0.149466667 | 0.009266667 | 1.006443837 |
| 0.073066667  | 0.009266667 | 1.006443837 |
| 0.202866667  | 0.009255556 | 1.006436085 |
| 0.002933333  | 0.009211111 | 1.006405081 |
| -0.2889      | 0.009188889 | 1.006389579 |
| -0.101733333 | 0.009155556 | 1.006366327 |
| -0.0339      | 0.009155556 | 1.006366327 |
| -0.2858      | 0.009077778 | 1.006312074 |
| -0.094233333 | 0.009066667 | 1.006304324 |
| 0.175866667  | 0.009011111 | 1.006265573 |
| -0.167333333 | 0.008988889 | 1.006250074 |
| 0.0273       | 0.008966667 | 1.006234574 |
| -0.232366667 | 0.008944444 | 1.006219075 |
| -0.0569      | 0.008888889 | 1.006180328 |
| 0.019533333  | 0.008855556 | 1.006157081 |
| 0.1091       | 0.008855556 | 1.006157081 |
| -0.048066667 | 0.008811111 | 1.006126085 |
| 0.017666667  | 0.008766667 | 1.00609509  |
| -0.070066667 | 0.008688889 | 1.006040852 |
| 0.059633333  | 0.008677778 | 1.006033104 |
| 0.0573       | 0.008666667 | 1.006025355 |
| 0.249266667  | 0.008655556 | 1.006017607 |
| 0.050733333  | 0.008544444 | 1.005940131 |
| -0.056666667 | 0.008488889 | 1.005901394 |
| 0.004366667  | 0.008477778 | 1.005893647 |
| 0.001466667  | 0.008477778 | 1.005893647 |
| -0.102166667 | 0.008422222 | 1.005854913 |
| -0.046466667 | 0.008388889 | 1.005831673 |
| -0.009566667 | 0.008377778 | 1.005823927 |
| -0.013266667 | 0.008288889 | 1.005761957 |
| -0.048533333 | 0.008277778 | 1.005754211 |
| 0.1023       | 0.008277778 | 1.005754211 |
| -0.032166667 | 0.0082      | 1.00569999  |
| 0.0589       | 0.008155556 | 1.005669009 |
| -0.2321      | 0.0081      | 1.005630283 |
| -0.005       | 0.008077778 | 1.005614793 |
| 0.0162       | 0.008077778 | 1.005614793 |
| -0.083933333 | 0.008044444 | 1.005591559 |
| -0.022833333 | 0.008       | 1.00556058  |

|              |             |             |
|--------------|-------------|-------------|
| -0.1124      | 0.007977778 | 1.005545092 |
| 0.062366667  | 0.007944444 | 1.005521859 |
| -0.093033333 | 0.007933333 | 1.005514115 |
| 0.0303       | 0.007888889 | 1.005483139 |
| -0.0351      | 0.007877778 | 1.005475395 |
| 0.0138       | 0.007822222 | 1.005436677 |
| -0.1493      | 0.007822222 | 1.005436677 |
| -0.088666667 | 0.0078      | 1.00542119  |
| -0.078433333 | 0.007777778 | 1.005405703 |
| -0.1135      | 0.007766667 | 1.00539796  |
| -0.198333333 | 0.007711111 | 1.005359245 |
| 0.255133333  | 0.0077      | 1.005351502 |
| 0.003466667  | 0.007688889 | 1.005343759 |
| -0.0431      | 0.007655556 | 1.005320531 |
| -0.0739      | 0.007611111 | 1.005289561 |
| -0.031866667 | 0.007544444 | 1.005243108 |
| -0.128066667 | 0.007522222 | 1.005227624 |
| -0.297933333 | 0.007455556 | 1.005181173 |
| -0.0077      | 0.007455556 | 1.005181173 |
| -0.133233333 | 0.007444444 | 1.005173432 |
| -0.028566667 | 0.007377778 | 1.005126984 |
| -0.109133333 | 0.007366667 | 1.005119243 |
| 0.1949       | 0.007366667 | 1.005119243 |
| 0.069933333  | 0.007344444 | 1.005103761 |
| 0.067333333  | 0.007344444 | 1.005103761 |
| 0.041733333  | 0.007344444 | 1.005103761 |
| -0.1649      | 0.007311111 | 1.005080538 |
| 0.032333333  | 0.0073      | 1.005072798 |
| -0.133933333 | 0.007288889 | 1.005065057 |
| 0.016933333  | 0.007255556 | 1.005041835 |
| 0.055866667  | 0.007211111 | 1.005010874 |
| -0.063466667 | 0.0072      | 1.005003134 |
| -0.047233333 | 0.007166667 | 1.004979914 |
| -0.109133333 | 0.007155556 | 1.004972174 |
| 0.027533333  | 0.007122222 | 1.004948954 |
| 0.0258       | 0.007066667 | 1.004910256 |
| -0.212133333 | 0.007055556 | 1.004902517 |
| -0.2123      | 0.007033333 | 1.004887038 |
| -0.0376      | 0.007       | 1.00486382  |
| 0.097        | 0.006933333 | 1.004817387 |
| -0.1823      | 0.006922222 | 1.004809648 |
| 0.030066667  | 0.0069      | 1.004794171 |
| -0.0147      | 0.006855556 | 1.004763217 |
| -0.150633333 | 0.006844444 | 1.004755479 |
| -0.008133333 | 0.006844444 | 1.004755479 |
| -0.195966667 | 0.0068      | 1.004724526 |
| 0.145666667  | 0.006777778 | 1.00470905  |

|              |             |             |
|--------------|-------------|-------------|
| -0.0866      | 0.006744444 | 1.004685837 |
| 0.038133333  | 0.006722222 | 1.004670362 |
| 0.173033333  | 0.006711111 | 1.004662624 |
| -0.068366667 | 0.0067      | 1.004654887 |
| -0.0209      | 0.006633333 | 1.004608463 |
| -0.025166667 | 0.006577778 | 1.004569778 |
| 6.67E-05     | 0.006477778 | 1.004500149 |
| -0.121233333 | 0.006455556 | 1.004484676 |
| -0.2225      | 0.006444444 | 1.00447694  |
| -0.084033333 | 0.006433333 | 1.004469204 |
| -0.117966667 | 0.006422222 | 1.004461468 |
| 0.0366       | 0.006377778 | 1.004430525 |
| 0.010366667  | 0.006355556 | 1.004415053 |
| -0.2354      | 0.006344444 | 1.004407318 |
| -0.0191      | 0.006288889 | 1.00436864  |
| 0.020333333  | 0.006166667 | 1.004283556 |
| -0.216166667 | 0.006055556 | 1.004206213 |
| -0.0283      | 0.006022222 | 1.004183011 |
| -0.126733333 | 0.005944444 | 1.004128875 |
| -0.138166667 | 0.005866667 | 1.004074743 |
| 0.1812       | 0.005844444 | 1.004059277 |
| -0.073       | 0.005744444 | 1.003989683 |
| 0.114233333  | 0.0057      | 1.003958754 |
| 0.157866667  | 0.005677778 | 1.00394329  |
| -0.0531      | 0.005644444 | 1.003920094 |
| 0.0245       | 0.005633333 | 1.003912363 |
| 0.0041       | 0.005633333 | 1.003912363 |
| 0.094        | 0.005555556 | 1.003858242 |
| -0.162366667 | 0.005555556 | 1.003858242 |
| 0.0495       | 0.005555556 | 1.003858242 |
| -0.0462      | 0.005522222 | 1.003835048 |
| 0.559066667  | 0.0055      | 1.003819586 |
| 0.170433333  | 0.005488889 | 1.003811855 |
| -0.0849      | 0.005444444 | 1.003780931 |
| 0.094766667  | 0.005422222 | 1.00376547  |
| 0.0583       | 0.005411111 | 1.003757739 |
| -0.045666667 | 0.005366667 | 1.003726817 |
| 0.165866667  | 0.005333333 | 1.003703627 |
| -0.001333333 | 0.005255556 | 1.003649517 |
| -0.120533333 | 0.005255556 | 1.003649517 |
| 0.0119       | 0.005255556 | 1.003649517 |
| 0.148133333  | 0.005244444 | 1.003641787 |
| 0.184533333  | 0.005233333 | 1.003634057 |
| -0.0235      | 0.005211111 | 1.003618598 |
| -0.0363      | 0.0052      | 1.003610869 |
| -0.063466667 | 0.005166667 | 1.003587681 |
| 0.114366667  | 0.0051      | 1.003471749 |



|              |             |             |
|--------------|-------------|-------------|
| -0.0498      | 0.004944444 | 1.003433107 |
| -0.226233333 | 0.004933333 | 1.003425379 |
| -0.2143      | 0.004911111 | 1.003409923 |
| 0.038966667  | 0.004888889 | 1.003394468 |
| 0.532        | 0.004877778 | 1.00338674  |
| 0.022666667  | 0.004866667 | 1.003379012 |
| -0.085033333 | 0.004833333 | 1.00335583  |
| 0.069966667  | 0.004833333 | 1.00335583  |
| -0.085966667 | 0.004811111 | 1.003340375 |
| -0.175966667 | 0.004777778 | 1.003317193 |
| -0.0829      | 0.004777778 | 1.003317193 |
| 0.063633333  | 0.004755556 | 1.003301739 |
| -0.0677      | 0.004744444 | 1.003294012 |
| 0.0426       | 0.004711111 | 1.003270831 |
| 0.077766667  | 0.004666667 | 1.003239924 |
| -0.020466667 | 0.004655556 | 1.003232198 |
| -0.059633333 | 0.004644444 | 1.003224471 |
| 0.0858       | 0.004633333 | 1.003216745 |
| -0.023166667 | 0.004633333 | 1.003216745 |
| 0.043833333  | 0.004611111 | 1.003201292 |
| -0.026166667 | 0.004555556 | 1.003162661 |
| 0.0527       | 0.004522222 | 1.003139483 |
| -0.046966667 | 0.004511111 | 1.003131758 |
| 0.071466667  | 0.0045      | 1.003124032 |
| 0.129833333  | 0.004466667 | 1.003100855 |
| 0.0253       | 0.0044      | 1.003054503 |
| -0.0262      | 0.0044      | 1.003054503 |
| 0.097433333  | 0.0044      | 1.003054503 |
| -0.040166667 | 0.0043      | 1.002984979 |
| -0.0497      | 0.004211111 | 1.002923184 |
| 0.009066667  | 0.004211111 | 1.002923184 |
| -0.045666667 | 0.004133333 | 1.002869116 |
| -0.1061      | 0.004111111 | 1.002853669 |
| 0.314566667  | 0.004066667 | 1.002822775 |
| -0.1003      | 0.004066667 | 1.002822775 |
| 0.053166667  | 0.004055556 | 1.002815052 |
| 0.072366667  | 0.004022222 | 1.002791882 |
| -0.002733333 | 0.003933333 | 1.002730099 |
| -0.021733333 | 0.003877778 | 1.002691486 |
| 0.069733333  | 0.003855556 | 1.002676042 |
| 0.143366667  | 0.003822222 | 1.002652875 |
| 0.006766667  | 0.003811111 | 1.002645153 |
| -0.0918      | 0.0038      | 1.002637431 |
| -0.0069      | 0.003777778 | 1.002621987 |
| 0.041        | 0.003755556 | 1.002606544 |
| 0.0508       | 0.003744444 | 1.002598822 |
| 0.136566667  | 0.003733333 | 1.002591101 |

|              |             |             |
|--------------|-------------|-------------|
| -0.103933333 | 0.003711111 | 1.002575658 |
| -0.1687      | 0.0037      | 1.002567936 |
| -0.029466667 | 0.003644444 | 1.00252933  |
| 0.0658       | 0.003644444 | 1.00252933  |
| -0.146666667 | 0.003633333 | 1.002521609 |
| -0.0339      | 0.003622222 | 1.002513888 |
| -0.0138      | 0.003566667 | 1.002475283 |
| 0.032133333  | 0.003566667 | 1.002475283 |
| -0.044566667 | 0.003511111 | 1.002436681 |
| -0.083066667 | 0.003466667 | 1.0024058   |
| -0.123766667 | 0.003466667 | 1.0024058   |
| -0.1515      | 0.003455556 | 1.002398079 |
| 0.060866667  | 0.003422222 | 1.002374919 |
| 0.008633333  | 0.0034      | 1.00235948  |
| -0.177866667 | 0.003377778 | 1.00234404  |
| -0.1803      | 0.003344444 | 1.002320881 |
| 0.1256       | 0.003288889 | 1.002282285 |
| 0.105        | 0.003277778 | 1.002274565 |
| 0.181866667  | 0.003266667 | 1.002266846 |
| 0.099766667  | 0.003255556 | 1.002259127 |
| 0.028366667  | 0.0032      | 1.002220533 |
| -0.043333333 | 0.0032      | 1.002220533 |
| 0.098133333  | 0.003122222 | 1.002166503 |
| -0.1299      | 0.003088889 | 1.002143348 |
| -0.0664      | 0.002977778 | 1.00206617  |
| 0.0187       | 0.002977778 | 1.00206617  |
| -0.071233333 | 0.002944444 | 1.002043017 |
| -0.0055      | 0.0029      | 1.002012148 |
| -0.004033333 | 0.0029      | 1.002012148 |
| -0.1057      | 0.002833333 | 1.001965847 |
| -0.155866667 | 0.002788889 | 1.00193498  |
| -0.107466667 | 0.002733333 | 1.001896398 |
| -0.140833333 | 0.002711111 | 1.001880966 |
| -0.068533333 | 0.002677778 | 1.001857818 |
| 0.0231       | 0.002677778 | 1.001857818 |
| -0.089166667 | 0.002611111 | 1.001811523 |
| -0.066066667 | 0.0026      | 1.001803808 |
| -0.0255      | 0.0026      | 1.001803808 |
| -0.119833333 | 0.002577778 | 1.001788377 |
| -0.070866667 | 0.0025      | 1.00173437  |
| 0.030166667  | 0.002455556 | 1.001703511 |
| -0.102966667 | 0.002455556 | 1.001703511 |
| -0.017966667 | 0.002455556 | 1.001703511 |
| -0.0348      | 0.002388889 | 1.001657223 |
| 0.018        | 0.002366667 | 1.001641795 |
| -0.0884      | 0.002366667 | 1.001641795 |
| 0.0072       | 0.002355556 | 1.00163408  |

|              |             |             |
|--------------|-------------|-------------|
| -0.042333333 | 0.002311111 | 1.001603224 |
| 0.207833333  | 0.0023      | 1.00159551  |
| 0.1304       | 0.002288889 | 1.001587796 |
| -0.0925      | 0.002244444 | 1.001556941 |
| -0.0169      | 0.002233333 | 1.001549228 |
| 0.0184       | 0.0022      | 1.001526087 |
| -0.097566667 | 0.002188889 | 1.001518374 |
| -0.028933333 | 0.002088889 | 1.001448956 |
| 0.146866667  | 0.002033333 | 1.001410393 |
| 0.0035       | 0.002011111 | 1.001394968 |
| 0.0518       | 0.001977778 | 1.001371831 |
| 0.157466667  | 0.001955556 | 1.001356407 |
| 0.047466667  | 0.001944444 | 1.001348695 |
| -0.070166667 | 0.001944444 | 1.001348695 |
| 0.126633333  | 0.001944444 | 1.001348695 |
| -0.036666667 | 0.001933333 | 1.001340983 |
| 0.018033333  | 0.001922222 | 1.001333271 |
| -0.046466667 | 0.001911111 | 1.001325559 |
| -0.116133333 | 0.001877778 | 1.001302424 |
| 0.049633333  | 0.001877778 | 1.001302424 |
| -0.093466667 | 0.001855556 | 1.001287001 |
| -0.0997      | 0.0018      | 1.001248444 |
| 0.113666667  | 0.001766667 | 1.00122531  |
| 0.1618       | 0.001755556 | 1.001217599 |
| 0.0458       | 0.001755556 | 1.001217599 |
| 0.157333333  | 0.001722222 | 1.001194466 |
| 0.010166667  | 0.001533333 | 1.001063391 |
| 0.0131       | 0.001522222 | 1.001055681 |
| 0.056766667  | 0.001511111 | 1.001047971 |
| 0.068366667  | 0.001511111 | 1.001047971 |
| 0.1621       | 0.001466667 | 1.001017133 |
| -0.0873      | 0.001455556 | 1.001009423 |
| -0.065233333 | 0.001455556 | 1.001009423 |
| -0.035633333 | 0.001288889 | 1.000893789 |
| 0.069133333  | 0.001266667 | 1.000878372 |
| -0.069766667 | 0.001255556 | 1.000870664 |
| -0.026733333 | 0.001222222 | 1.000847539 |
| -0.075733333 | 0.001188889 | 1.000824415 |
| -0.011266667 | 0.001155556 | 1.000801291 |
| 0.126133333  | 0.001144444 | 1.000793583 |
| 0.2036       | 0.001144444 | 1.000793583 |
| 0.018266667  | 0.001144444 | 1.000793583 |
| 0.049766667  | 0.001111111 | 1.00077046  |
| -0.121933333 | 0.0011      | 1.000762753 |
| 0.020066667  | 0.001055556 | 1.000731923 |
| 0.011833333  | 0.000966667 | 1.000670267 |
| -0.053933333 | 0.000888889 | 1.000616321 |

|              |              |             |
|--------------|--------------|-------------|
| 0.1509       | 0.000877778  | 1.000608614 |
| 0.009866667  | 0.0008       | 1.000554672 |
| 0.055066667  | 0.0008       | 1.000554672 |
| -0.097633333 | 0.000777778  | 1.00053926  |
| 0.1124       | 0.000711111  | 1.000493026 |
| 0.008        | 0.0007       | 1.000485321 |
| 0.2669       | 0.000655556  | 1.0004545   |
| 0.002733333  | 0.000633333  | 1.00043909  |
| -0.038033333 | 0.000588889  | 1.00040827  |
| -0.194666667 | 0.000566667  | 1.000392861 |
| -0.0746      | 0.0005       | 1.000346634 |
| 0.056566667  | 0.000477778  | 1.000331225 |
| -0.106666667 | 0.000466667  | 1.000323521 |
| 0.196166667  | 0.000455556  | 1.000315817 |
| 0.0878       | 0.000455556  | 1.000315817 |
| -0.035166667 | 0.000388889  | 1.000269594 |
| -0.1201      | 0.000333333  | 1.000231076 |
| 0.030533333  | 0.000322222  | 1.000223372 |
| 0.075933333  | 0.0003       | 1.000207966 |
| -0.027566667 | 0.000233333  | 1.000161747 |
| 0.072033333  | 0.000233333  | 1.000161747 |
| -0.022966667 | 0.000222222  | 1.000154045 |
| -0.046766667 | 0.000222222  | 1.000154045 |
| 0.1395       | 0.000188889  | 1.000130936 |
| 0.1127       | 0.000166667  | 1.000115531 |
| -0.045766667 | 0.000155556  | 1.000107829 |
| 0.090233333  | 0.000155556  | 1.000107829 |
| 0.139766667  | 0.0001       | 1.000069317 |
| -0.0468      | 1E-04        | 1.000069317 |
| -0.000433333 | 5.55556E-05  | 1.000038509 |
| 0.014533333  | 3.33333E-05  | 1.000023105 |
| -0.074033333 | 0            | 1           |
| -0.119266667 | -4.44444E-05 | 0.999969194 |
| -0.0756      | -8.88889E-05 | 0.999938389 |
| -0.186766667 | -0.0001      | 0.999930688 |
| -0.090433333 | -1E-04       | 0.999930688 |
| -0.089066667 | -1E-04       | 0.999930688 |
| -0.1361      | -0.0001      | 0.999930688 |
| -0.0699      | -0.0001      | 0.999930688 |
| -0.063       | -0.0001      | 0.999930688 |
| 0.041966667  | -0.000133333 | 0.999907585 |
| -0.046733333 | -0.000144444 | 0.999899884 |
| 0.033766667  | -0.000144444 | 0.999899884 |
| -0.0482      | -0.000166667 | 0.999884482 |
| 0.000166667  | -0.000177778 | 0.999876781 |
| 0.063933333  | -0.000222222 | 0.999845979 |
| 0.032533333  | -0.000244444 | 0.999830578 |

|              |              |             |
|--------------|--------------|-------------|
| -0.021266667 | -0.000255556 | 0.999822878 |
| -0.124733333 | -0.0003      | 0.999792077 |
| 0.272333333  | -0.000322222 | 0.999776678 |
| -0.165166667 | -0.000322222 | 0.999776678 |
| 0.041966667  | -0.000344444 | 0.999761278 |
| -0.0474      | -0.000388889 | 0.999730479 |
| -0.016333333 | -0.000477778 | 0.999668885 |
| 0.037266667  | -0.000533333 | 0.99963039  |
| -0.180366667 | -0.000533333 | 0.99963039  |
| -0.018166667 | -0.000577778 | 0.999599595 |
| -0.120433333 | -0.0006      | 0.999584198 |
| 0.128566667  | -0.000633333 | 0.999561103 |
| -0.186533333 | -0.0007      | 0.999514915 |
| 0.066366667  | -0.000722222 | 0.999499519 |
| 0.016566667  | -0.000755556 | 0.999476426 |
| 0.042366667  | -0.000777778 | 0.999461031 |
| -0.0447      | -0.000788889 | 0.999453333 |
| -0.0899      | -0.0008      | 0.999445636 |
| 0.222333333  | -0.0008      | 0.999445636 |
| 0.085266667  | -0.000844444 | 0.999414847 |
| -0.0732      | -0.000933333 | 0.999353272 |
| 0.049866667  | -0.000966667 | 0.999330182 |
| 0.027733333  | -0.001022222 | 0.999291701 |
| 0.055333333  | -0.001055556 | 0.999268612 |
| -0.1778      | -0.001133333 | 0.999214742 |
| 0.041066667  | -0.001177778 | 0.99918396  |
| -0.0209      | -0.001222222 | 0.999153179 |
| 0.020333333  | -0.001244444 | 0.999137789 |
| 0.134866667  | -0.001244444 | 0.999137789 |
| -0.077       | -0.001266667 | 0.999122399 |
| -0.014       | -0.001344444 | 0.999068536 |
| 0.0897       | -0.001355556 | 0.999060842 |
| 0.066833333  | -0.0014      | 0.999030065 |
| 0.0939       | -0.001433333 | 0.999006982 |
| -0.030866667 | -0.001455556 | 0.998991595 |
| 0.069733333  | -0.001466667 | 0.998983901 |
| -0.437766667 | -0.001488889 | 0.998968513 |
| 0.071833333  | -0.001511111 | 0.998953126 |
| 0.149533333  | -0.001522222 | 0.998945432 |
| 0.1653       | -0.001566667 | 0.998914659 |
| -0.146766667 | -0.0016      | 0.998891579 |
| -0.206533333 | -0.001611111 | 0.998883886 |
| -0.208066667 | -0.001611111 | 0.998883886 |
| -0.072866667 | -0.001611111 | 0.998883886 |
| -0.042266667 | -0.001644444 | 0.998860807 |
| 0.2025       | -0.001655556 | 0.998853115 |
| 0.0538       | -0.001711111 | 0.998814651 |

|              |              |             |
|--------------|--------------|-------------|
| 0.0779       | -0.001722222 | 0.998806959 |
| -0.3933      | -0.001755556 | 0.998783882 |
| 0.1362       | -0.001777778 | 0.998768497 |
| -0.0379      | -0.001811111 | 0.998745421 |
| -0.176933333 | -0.001877778 | 0.99869927  |
| -0.1337      | -0.001877778 | 0.99869927  |
| -0.088866667 | -0.001877778 | 0.99869927  |
| 0.1011       | -0.001966667 | 0.998637739 |
| 0.0054       | -0.001988889 | 0.998622357 |
| 0.009233333  | -0.002066667 | 0.998568521 |
| -0.083566667 | -0.002077778 | 0.998560831 |
| -0.115933333 | -0.002077778 | 0.998560831 |
| -0.249666667 | -0.002077778 | 0.998560831 |
| 0.012        | -0.002088889 | 0.99855314  |
| -0.093933333 | -0.002088889 | 0.99855314  |
| 0.067        | -0.0021      | 0.99854545  |
| 0.004133333  | -0.002111111 | 0.998537759 |
| -0.117633333 | -0.002155556 | 0.998506998 |
| 0.025833333  | -0.002211111 | 0.998468548 |
| 0.0604       | -0.002222222 | 0.998460859 |
| -0.0817      | -0.002233333 | 0.998453169 |
| 0.0802       | -0.002288889 | 0.998414721 |
| -0.284633333 | -0.002322222 | 0.998391653 |
| -0.0319      | -0.002322222 | 0.998391653 |
| 0.062433333  | -0.002322222 | 0.998391653 |
| -0.0008      | -0.002344444 | 0.998376275 |
| -0.008       | -0.002355556 | 0.998368586 |
| -0.027633333 | -0.002377778 | 0.998353207 |
| -0.124766667 | -0.002388889 | 0.998345519 |
| 0.050366667  | -0.002422222 | 0.998322452 |
| 0.133666667  | -0.002533333 | 0.998245568 |
| -0.1248      | -0.002577778 | 0.998214816 |
| 0.044266667  | -0.002644444 | 0.99816869  |
| -0.011733333 | -0.002722222 | 0.998114878 |
| 0.016566667  | -0.002744444 | 0.998099504 |
| 0.0334       | -0.002766667 | 0.99808413  |
| -0.0114      | -0.002822222 | 0.998045697 |
| 0.001866667  | -0.002866667 | 0.998014951 |
| -0.002966667 | -0.002866667 | 0.998014951 |
| -0.052033333 | -0.002888889 | 0.997999578 |
| -0.027333333 | -0.002966667 | 0.997945776 |
| 0.050666667  | -0.002977778 | 0.99793809  |
| -0.071166667 | -0.003022222 | 0.997907348 |
| -0.0879      | -0.003033333 | 0.997899662 |
| 0.078633333  | -0.003044444 | 0.997891977 |
| -0.020166667 | -0.003077778 | 0.997868921 |
| 0.134066667  | -0.003088889 | 0.997861236 |

|              |              |             |
|--------------|--------------|-------------|
| 0.038033333  | -0.003144444 | 0.997822811 |
| -0.026266667 | -0.003177778 | 0.997799756 |
| -0.065133333 | -0.003188889 | 0.997792072 |
| -0.167166667 | -0.003222222 | 0.997769018 |
| -0.0232      | -0.003233333 | 0.997761334 |
| 0.165966667  | -0.003244444 | 0.997753649 |
| -0.077133333 | -0.003255556 | 0.997745965 |
| -0.0014      | -0.0033      | 0.997715228 |
| -0.026066667 | -0.003311111 | 0.997707544 |
| 0.186333333  | -0.003311111 | 0.997707544 |
| 0.061        | -0.003355556 | 0.997676809 |
| 0.033833333  | -0.003366667 | 0.997669125 |
| -0.075766667 | -0.003422222 | 0.997630708 |
| 0.0356       | -0.003533333 | 0.997553877 |
| 0.144566667  | -0.003577778 | 0.997523146 |
| -0.146       | -0.003588889 | 0.997515463 |
| 0.042133333  | -0.003633333 | 0.997484734 |
| -0.015033333 | -0.003655556 | 0.997469369 |
| 0.074833333  | -0.003711111 | 0.997430959 |
| -0.0273      | -0.003766667 | 0.997392551 |
| -0.092033333 | -0.003777778 | 0.997384869 |
| -0.044933333 | -0.0038      | 0.997369507 |
| 0.094666667  | -0.003877778 | 0.997315738 |
| 0.020866667  | -0.003911111 | 0.997292696 |
| 0.010933333  | -0.003988889 | 0.997238932 |
| 0.334066667  | -0.004011111 | 0.997223571 |
| 0.018633333  | -0.004011111 | 0.997223571 |
| -0.013466667 | -0.004055556 | 0.997192851 |
| 0.050133333  | -0.004055556 | 0.997192851 |
| -0.026333333 | -0.0041      | 0.997162131 |
| -0.087133333 | -0.0041      | 0.997162131 |
| -0.055733333 | -0.0041      | 0.997162131 |
| -0.1045      | -0.004155556 | 0.997123733 |
| -0.087366667 | -0.004166667 | 0.997116053 |
| -0.0275      | -0.004177778 | 0.997108374 |
| -0.044433333 | -0.0042      | 0.997093015 |
| 0.080633333  | -0.0042      | 0.997093015 |
| 0.050866667  | -0.0042      | 0.997093015 |
| 0.030966667  | -0.004277778 | 0.997039262 |
| 0.0126       | -0.004355556 | 0.996985512 |
| 0.008        | -0.004377778 | 0.996970155 |
| -0.123       | -0.004388889 | 0.996962477 |
| 0.0543       | -0.004444444 | 0.996924086 |
| 0.124333333  | -0.004488889 | 0.996893375 |
| -0.079966667 | -0.004533333 | 0.996862665 |
| -0.0237      | -0.0046      | 0.996816601 |
| -0.001933333 | -0.004622222 | 0.996801247 |

|              |              |             |
|--------------|--------------|-------------|
| 0.055633333  | -0.004677778 | 0.996762862 |
| -0.014466667 | -0.0047      | 0.996747509 |
| -0.031833333 | -0.004811111 | 0.996670746 |
| 0.262066667  | -0.004811111 | 0.996670746 |
| -0.0885      | -0.004811111 | 0.996670746 |
| 0.011666667  | -0.004822222 | 0.99666307  |
| -0.005033333 | -0.004833333 | 0.996655394 |
| 0.0449       | -0.004911111 | 0.996601665 |
| -0.059433333 | -0.004988889 | 0.996547938 |
| -0.0538      | -0.005       | 0.996540263 |
| 0.052633333  | -0.005       | 0.996540263 |
| 1.00E-04     | -0.005033333 | 0.996517238 |
| 0.003333333  | -0.005055556 | 0.996501889 |
| 0.052366667  | -0.005066667 | 0.996494214 |
| -0.036966667 | -0.005088889 | 0.996478865 |
| -0.074366667 | -0.0051      | 0.99647119  |
| -0.079566667 | -0.005222222 | 0.996386775 |
| -0.036266667 | -0.005222222 | 0.996386775 |
| -0.0439      | -0.005255556 | 0.996363754 |
| 0.098566667  | -0.005266667 | 0.99635608  |
| 0.123666667  | -0.005311111 | 0.996325386 |
| -0.188366667 | -0.005311111 | 0.996325386 |
| -0.038866667 | -0.005422222 | 0.996248656 |
| -0.015233333 | -0.005433333 | 0.996240983 |
| -0.0869      | -0.005455556 | 0.996225638 |
| 0.0498       | -0.005522222 | 0.996179604 |
| 0.074433333  | -0.005544444 | 0.996164259 |
| 0.0614       | -0.005588889 | 0.996133571 |
| 0.123866667  | -0.0056      | 0.9961259   |
| -0.0338      | -0.005655556 | 0.996087541 |
| -0.057466667 | -0.005722222 | 0.996041513 |
| -0.031266667 | -0.005766667 | 0.996010829 |
| 0.071        | -0.0058      | 0.995987817 |
| 0.260766667  | -0.005822222 | 0.995972475 |
| 0.019633333  | -0.005833333 | 0.995964805 |
| -0.088233333 | -0.005866667 | 0.995941793 |
| -0.1071      | -0.005888889 | 0.995926453 |
| -0.224833333 | -0.0059      | 0.995918783 |
| -0.068366667 | -0.005922222 | 0.995903442 |
| 0.0125       | -0.005933333 | 0.995895772 |
| -0.246066667 | -0.006022222 | 0.995834414 |
| -0.221533333 | -0.006066667 | 0.995803736 |
| 0.148366667  | -0.006066667 | 0.995803736 |
| -0.032033333 | -0.006133333 | 0.995757721 |
| -0.026933333 | -0.006166667 | 0.995734715 |
| 0.061966667  | -0.006166667 | 0.995734715 |
| -0.007333333 | -0.006177778 | 0.995727046 |



|              |              |             |
|--------------|--------------|-------------|
| -0.035166667 | -0.006222222 | 0.995696371 |
| 0.022633333  | -0.006233333 | 0.995688703 |
| -0.059233333 | -0.006244444 | 0.995681035 |
| -0.241766667 | -0.006255556 | 0.995673366 |
| 0.017533333  | -0.006288889 | 0.995650362 |
| -0.127366667 | -0.006311111 | 0.995635025 |
| 0.0312       | -0.006322222 | 0.995627357 |
| 0.053766667  | -0.006355556 | 0.995604354 |
| -0.104266667 | -0.006411111 | 0.995566016 |
| -0.196266667 | -0.006433333 | 0.995550681 |
| 0.105366667  | -0.006455556 | 0.995535346 |
| 0.0445       | -0.006455556 | 0.995535346 |
| 0.323533333  | -0.006455556 | 0.995535346 |
| -0.030733333 | -0.006488889 | 0.995512345 |
| 0.119833333  | -0.006511111 | 0.995497011 |
| 0.0108       | -0.006511111 | 0.995497011 |
| -0.046066667 | -0.006566667 | 0.995458677 |
| -0.042333333 | -0.0066      | 0.995435677 |
| -0.012166667 | -0.006611111 | 0.99542801  |
| -0.039466667 | -0.006622222 | 0.995420344 |
| -0.007433333 | -0.006644444 | 0.995405011 |
| 0.067166667  | -0.006677778 | 0.995382013 |
| -0.224233333 | -0.006688889 | 0.995374347 |
| 0.251666667  | -0.006711111 | 0.995359015 |
| 0.0286       | -0.006733333 | 0.995343683 |
| 0.021933333  | -0.006788889 | 0.995305355 |
| -0.036833333 | -0.0068      | 0.99529769  |
| -0.238       | -0.006811111 | 0.995290024 |
| -0.101233333 | -0.006844444 | 0.995267029 |
| 0.039133333  | -0.006855556 | 0.995259363 |
| -0.098933333 | -0.0069      | 0.995228703 |
| 0.0421       | -0.006911111 | 0.995221039 |
| -0.070666667 | -0.006911111 | 0.995221039 |
| -0.012233333 | -0.006933333 | 0.995205709 |
| -0.1088      | -0.006955556 | 0.99519038  |
| 0.096566667  | -0.007022222 | 0.995144393 |
| -0.065533333 | -0.007044444 | 0.995129065 |
| -0.1167      | -0.007066667 | 0.995113737 |
| 0.056566667  | -0.0071      | 0.995090745 |
| 0.094933333  | -0.007133333 | 0.995067754 |
| -0.182333333 | -0.007211111 | 0.99501411  |
| 0.0686       | -0.007277778 | 0.994968131 |
| -0.0264      | -0.007288889 | 0.994960468 |
| 0.230166667  | -0.007355556 | 0.994914493 |
| 0.061266667  | -0.007411111 | 0.994876181 |
| -0.173133333 | -0.007433333 | 0.994860857 |
| -0.045266667 | -0.007488889 | 0.994822547 |

|              |              |             |
|--------------|--------------|-------------|
| 0.091766667  | -0.0075      | 0.994814886 |
| 0.0982       | -0.007522222 | 0.994799562 |
| 0.1527       | -0.007522222 | 0.994799562 |
| -0.016733333 | -0.0076      | 0.994745933 |
| 0.0201       | -0.007622222 | 0.99473061  |
| 0.351633333  | -0.007655556 | 0.994707627 |
| 0.119        | -0.007655556 | 0.994707627 |
| 0.072133333  | -0.007688889 | 0.994684645 |
| -0.141266667 | -0.007711111 | 0.994669324 |
| -0.0297      | -0.007711111 | 0.994669324 |
| 0.001233333  | -0.007733333 | 0.994654003 |
| -0.083333333 | -0.007755556 | 0.994638682 |
| 0.050266667  | -0.007777778 | 0.994623361 |
| 0.1255       | -0.007866667 | 0.994562081 |
| -0.1337      | -0.007877778 | 0.994554422 |
| 0.221866667  | -0.007944444 | 0.994508465 |
| -0.069633333 | -0.008022222 | 0.994454851 |
| -0.152133333 | -0.008088889 | 0.994408898 |
| 0.009033333  | -0.008088889 | 0.994408898 |
| -0.032466667 | -0.008111111 | 0.994393581 |
| 0.130266667  | -0.008122222 | 0.994385923 |
| -0.187166667 | -0.008155556 | 0.994362948 |
| -0.005766667 | -0.008166667 | 0.99435529  |
| -0.055333333 | -0.008177778 | 0.994347631 |
| -0.031033333 | -0.008177778 | 0.994347631 |
| 0.0008       | -0.008177778 | 0.994347631 |
| -0.0338      | -0.008277778 | 0.994278711 |
| 0.154266667  | -0.008288889 | 0.994271053 |
| 0.031666667  | -0.0083      | 0.994263396 |
| -0.0547      | -0.0083      | 0.994263396 |
| -0.038366667 | -0.008444444 | 0.994163854 |
| -0.0631      | -0.008455556 | 0.994156197 |
| 0.1018       | -0.008466667 | 0.994148541 |
| -0.029233333 | -0.008533333 | 0.994102602 |
| 0.094266667  | -0.008533333 | 0.994102602 |
| 0.1308       | -0.008577778 | 0.994071978 |
| -0.145966667 | -0.008622222 | 0.994041355 |
| 0.011533333  | -0.008722222 | 0.993972455 |
| -0.088533333 | -0.008788889 | 0.993926525 |
| 0.0171       | -0.008788889 | 0.993926525 |
| 0.199033333  | -0.008844444 | 0.993888251 |
| 0.031233333  | -0.008866667 | 0.993872942 |
| -0.045133333 | -0.008877778 | 0.993865288 |
| -0.036666667 | -0.0089      | 0.993849979 |
| 0.057        | -0.008922222 | 0.993834671 |
| -0.260133333 | -0.008944444 | 0.993819363 |
| -0.008266667 | -0.008944444 | 0.993819363 |

|              |              |             |
|--------------|--------------|-------------|
| 0.1506       | -0.008966667 | 0.993804055 |
| -0.0838      | -0.008977778 | 0.993796401 |
| 0.036366667  | -0.008977778 | 0.993796401 |
| -0.3976      | -0.008988889 | 0.993788747 |
| 0.036433333  | -0.009011111 | 0.99377344  |
| -0.1396      | -0.009044444 | 0.993750479 |
| 0.1557       | -0.009066667 | 0.993735172 |
| 0.012666667  | -0.009077778 | 0.993727519 |
| -0.0139      | -0.009088889 | 0.993719865 |
| -0.0422      | -0.009155556 | 0.993673947 |
| 0.003933333  | -0.009155556 | 0.993673947 |
| -0.010266667 | -0.009177778 | 0.993658641 |
| 0.091533333  | -0.009233333 | 0.993620378 |
| 0.106533333  | -0.009255556 | 0.993605073 |
| -0.144633333 | -0.009266667 | 0.993597421 |
| -0.0821      | -0.009288889 | 0.993582116 |
| -0.071366667 | -0.009322222 | 0.99355916  |
| 0.0222       | -0.009322222 | 0.99355916  |
| 0.1542       | -0.009344444 | 0.993543856 |
| 0.077433333  | -0.009366667 | 0.993528552 |
| -0.0022      | -0.009388889 | 0.993513249 |
| 0.088633333  | -0.009388889 | 0.993513249 |
| -0.054966667 | -0.009388889 | 0.993513249 |
| -0.115066667 | -0.009388889 | 0.993513249 |
| 0.022        | -0.0094      | 0.993505597 |
| -0.018166667 | -0.009455556 | 0.99346734  |
| -0.0425      | -0.009466667 | 0.993459688 |
| 0.156233333  | -0.009555556 | 0.99339848  |
| -0.5166      | -0.009655556 | 0.993329625 |
| 0.018133333  | -0.0097      | 0.993299025 |
| -0.1065      | -0.009755556 | 0.993260775 |
| 0.025566667  | -0.009766667 | 0.993253126 |
| -0.071       | -0.009822222 | 0.993214878 |
| -0.128033333 | -0.009822222 | 0.993214878 |
| 0.008533333  | -0.009866667 | 0.993184281 |
| -0.029566667 | -0.009888889 | 0.993168983 |
| 0.073966667  | -0.009911111 | 0.993153685 |
| -0.1572      | -0.009911111 | 0.993153685 |
| -0.0811      | -0.009955556 | 0.99312309  |
| -0.053733333 | -0.009966667 | 0.993115441 |
| 0.0811       | -0.01        | 0.993092495 |
| 0.0676       | -0.01        | 0.993092495 |
| 0.0655       | -0.010022222 | 0.993077199 |
| 0.071133333  | -0.010033333 | 0.99306955  |
| 0.0184       | -0.010066667 | 0.993046606 |
| 0.051866667  | -0.010077778 | 0.993038958 |
| -0.024933333 | -0.0101      | 0.993023662 |

|              |              |             |
|--------------|--------------|-------------|
| -0.016766667 | -0.010122222 | 0.993008366 |
| -0.0595      | -0.010155556 | 0.992985423 |
| -0.014       | -0.0102      | 0.992954833 |
| 0.019266667  | -0.010211111 | 0.992947186 |
| -0.0676      | -0.010244444 | 0.992924244 |
| 0.021333333  | -0.010244444 | 0.992924244 |
| -0.009       | -0.010277778 | 0.992901303 |
| -0.036566667 | -0.010277778 | 0.992901303 |
| 0.055866667  | -0.010277778 | 0.992901303 |
| 0.130133333  | -0.010333333 | 0.992863069 |
| -0.014166667 | -0.010366667 | 0.992840129 |
| 0.085166667  | -0.0104      | 0.99281719  |
| -0.0249      | -0.010411111 | 0.992809544 |
| 0.183066667  | -0.010411111 | 0.992809544 |
| 0.003933333  | -0.010422222 | 0.992801897 |
| -0.049933333 | -0.010422222 | 0.992801897 |
| -0.111833333 | -0.010444444 | 0.992786605 |
| -0.1958      | -0.010466667 | 0.992771313 |
| 0.151166667  | -0.010522222 | 0.992733084 |
| -0.0415      | -0.010733333 | 0.992587827 |
| -0.017666667 | -0.010766667 | 0.992564894 |
| -0.209466667 | -0.010766667 | 0.992564894 |
| -0.009966667 | -0.010822222 | 0.992526672 |
| 0.053333333  | -0.010866667 | 0.992496097 |
| -0.007533333 | -0.010866667 | 0.992496097 |
| 0.121166667  | -0.010877778 | 0.992488453 |
| -0.028433333 | -0.010911111 | 0.992465522 |
| 0.1287       | -0.010911111 | 0.992465522 |
| 0.0138       | -0.010944444 | 0.992442591 |
| 0.0957       | -0.010944444 | 0.992442591 |
| 0.059033333  | -0.010966667 | 0.992427304 |
| -0.251533333 | -0.010977778 | 0.992419661 |
| -0.216366667 | -0.011011111 | 0.992396732 |
| -0.0232      | -0.011077778 | 0.992350874 |
| 0.033066667  | -0.011088889 | 0.992343231 |
| 0.096533333  | -0.011111111 | 0.992327946 |
| 0.0293       | -0.011122222 | 0.992320304 |
| 0.1034       | -0.011122222 | 0.992320304 |
| -0.0067      | -0.011144444 | 0.992305019 |
| -0.077133333 | -0.011188889 | 0.99227445  |
| 0.0529       | -0.0112      | 0.992266808 |
| -0.039366667 | -0.011255556 | 0.992228598 |
| 0.082466667  | -0.011311111 | 0.99219039  |
| -0.119366667 | -0.011411111 | 0.992121619 |
| -0.203266667 | -0.011411111 | 0.992121619 |
| -0.083266667 | -0.011533333 | 0.992037572 |
| 0.044433333  | -0.011533333 | 0.992037572 |

|              |              |             |
|--------------|--------------|-------------|
| 0.0341       | -0.011544444 | 0.992029932 |
| -0.026533333 | -0.011544444 | 0.992029932 |
| -0.1992      | -0.011611111 | 0.991984091 |
| 0.092066667  | -0.011611111 | 0.991984091 |
| -0.036033333 | -0.011711111 | 0.991915334 |
| -0.0869      | -0.011733333 | 0.991900056 |
| -0.0219      | -0.011755556 | 0.991884777 |
| -0.078166667 | -0.011822222 | 0.991838944 |
| 0.115433333  | -0.011844444 | 0.991823666 |
| 0.004566667  | -0.011877778 | 0.991800751 |
| -0.075566667 | -0.011877778 | 0.991800751 |
| 0.020666667  | -0.011933333 | 0.991762559 |
| 0.313766667  | -0.012077778 | 0.991663267 |
| 0.0139       | -0.0121      | 0.991647993 |
| 0.012466667  | -0.0121      | 0.991647993 |
| 0.139566667  | -0.012122222 | 0.991632718 |
| -0.025366667 | -0.012122222 | 0.991632718 |
| -0.0274      | -0.012188889 | 0.991586896 |
| -0.008233333 | -0.0122      | 0.991579259 |
| 0.3006       | -0.012211111 | 0.991571622 |
| -0.0251      | -0.012244444 | 0.991548712 |
| 0.012433333  | -0.012277778 | 0.991525803 |
| 0.016033333  | -0.012277778 | 0.991525803 |
| -0.003933333 | -0.012344444 | 0.991479986 |
| 0.0031       | -0.012366667 | 0.991464714 |
| -0.3187      | -0.012411111 | 0.991434171 |
| -0.021133333 | -0.012455556 | 0.991403629 |
| 0.124733333  | -0.012466667 | 0.991395993 |
| -0.007933333 | -0.012544444 | 0.991342547 |
| -0.097633333 | -0.012544444 | 0.991342547 |
| -0.015166667 | -0.012555556 | 0.991334912 |
| -0.0045      | -0.012588889 | 0.991312008 |
| 0.048233333  | -0.012644444 | 0.991273835 |
| -0.140866667 | -0.012688889 | 0.991243298 |
| 0.2693       | -0.012711111 | 0.991228029 |
| 0.025866667  | -0.012722222 | 0.991220395 |
| 0.0929       | -0.012766667 | 0.99118986  |
| 0.053433333  | -0.012833333 | 0.991144058 |
| -0.3132      | -0.012855556 | 0.991128791 |
| 0.062566667  | -0.012877778 | 0.991113525 |
| 0.075133333  | -0.0129      | 0.991098259 |
| 0.107766667  | -0.012911111 | 0.991090626 |
| -0.082533333 | -0.012944444 | 0.991067727 |
| 0.082333333  | -0.013       | 0.991029563 |
| 0.062666667  | -0.013022222 | 0.991014298 |
| -0.127633333 | -0.013033333 | 0.991006666 |
| -0.0066      | -0.013033333 | 0.991006666 |

|              |              |             |
|--------------|--------------|-------------|
| 0.001        | -0.0131      | 0.990960873 |
| 0.033833333  | -0.013111111 | 0.990953241 |
| -0.197933333 | -0.013177778 | 0.99090745  |
| -0.089533333 | -0.013233333 | 0.990869293 |
| -0.065666667 | -0.0134      | 0.99075483  |
| -0.196333333 | -0.013422222 | 0.990739569 |
| -0.094466667 | -0.013433333 | 0.990731939 |
| 0.069766667  | -0.013455556 | 0.990716678 |
| -0.191033333 | -0.013533333 | 0.990663269 |
| -0.043066667 | -0.013588889 | 0.990625121 |
| -0.002133333 | -0.0136      | 0.990617491 |
| 0.202766667  | -0.013622222 | 0.990602233 |
| -0.127633333 | -0.013633333 | 0.990594603 |
| 0.086033333  | -0.013666667 | 0.990571716 |
| -0.0065      | -0.013755556 | 0.990510686 |
| 0.093066667  | -0.013777778 | 0.990495429 |
| 0.0067       | -0.013788889 | 0.9904878   |
| -0.100466667 | -0.013833333 | 0.990457287 |
| 0.1711       | -0.013933333 | 0.990388637 |
| 0.1863       | -0.013933333 | 0.990388637 |
| -0.047466667 | -0.013944444 | 0.990381009 |
| -0.0261      | -0.014044444 | 0.990312363 |
| 0.017733333  | -0.014044444 | 0.990312363 |
| -0.062       | -0.014055556 | 0.990304736 |
| 0.2274       | -0.014066667 | 0.990297109 |
| 0.0742       | -0.014077778 | 0.990289483 |
| 0.0915       | -0.0141      | 0.990274229 |
| -0.112166667 | -0.014111111 | 0.990266602 |
| -0.2077      | -0.014133333 | 0.990251349 |
| -0.022533333 | -0.014177778 | 0.990220843 |
| 0.142466667  | -0.014222222 | 0.990190338 |
| 0.0313       | -0.014244444 | 0.990175086 |
| 0.1537       | -0.014255556 | 0.99016746  |
| 0.0212       | -0.014288889 | 0.990144583 |
| 0.1102       | -0.014288889 | 0.990144583 |
| -0.094033333 | -0.0143      | 0.990136957 |
| 0.230866667  | -0.014333333 | 0.990114081 |
| 0.008866667  | -0.014377778 | 0.990083579 |
| 0.0164       | -0.014455556 | 0.990030204 |
| -0.006233333 | -0.014477778 | 0.990014954 |
| -0.014966667 | -0.0145      | 0.989999705 |
| -0.0245      | -0.014533333 | 0.989976831 |
| 0.065533333  | -0.014555556 | 0.989961582 |
| 0.080466667  | -0.014644444 | 0.98990059  |
| 0.154833333  | -0.014711111 | 0.989854848 |
| -0.053533333 | -0.014766667 | 0.989816731 |
| -0.034266667 | -0.014788889 | 0.989801485 |

|              |              |             |
|--------------|--------------|-------------|
| -0.075733333 | -0.014822222 | 0.989778616 |
| -0.125566667 | -0.014866667 | 0.989748124 |
| -0.090033333 | -0.014888889 | 0.989732879 |
| 0.099        | -0.014911111 | 0.989717634 |
| 0.0704       | -0.015011111 | 0.989649034 |
| 0.004733333  | -0.015011111 | 0.989649034 |
| -0.055533333 | -0.015055556 | 0.989618547 |
| -0.128366667 | -0.015077778 | 0.989603304 |
| -0.046166667 | -0.015077778 | 0.989603304 |
| 0.0408       | -0.015166667 | 0.989542333 |
| -0.0061      | -0.0152      | 0.98951947  |
| -0.0392      | -0.015233333 | 0.989496608 |
| -0.131466667 | -0.015255556 | 0.989481367 |
| 0.0649       | -0.015255556 | 0.989481367 |
| -0.112833333 | -0.015266667 | 0.989473746 |
| 0.038066667  | -0.015266667 | 0.989473746 |
| -0.109233333 | -0.015266667 | 0.989473746 |
| -0.0341      | -0.015277778 | 0.989466125 |
| -0.007133333 | -0.015277778 | 0.989466125 |
| 0.1342       | -0.015355556 | 0.989412783 |
| -0.056833333 | -0.015388889 | 0.989389923 |
| 0.018833333  | -0.015433333 | 0.989359444 |
| -0.211266667 | -0.015455556 | 0.989344205 |
| -0.2608      | -0.015466667 | 0.989336585 |
| 0.073433333  | -0.015477778 | 0.989328966 |
| 0.1956       | -0.0155      | 0.989313727 |
| 0.197233333  | -0.015533333 | 0.989290869 |
| 0.0065       | -0.015533333 | 0.989290869 |
| -0.1035      | -0.015644444 | 0.989214681 |
| -0.189833333 | -0.015666667 | 0.989199444 |
| -0.025366667 | -0.015677778 | 0.989191825 |
| 0.001666667  | -0.015722222 | 0.989161352 |
| -0.0967      | -0.015844444 | 0.989077556 |
| -0.0195      | -0.015877778 | 0.989054704 |
| -0.102066667 | -0.015933333 | 0.989016618 |
| 0.0208       | -0.015944444 | 0.989009001 |
| -0.0702      | -0.015944444 | 0.989009001 |
| 0.0285       | -0.015944444 | 0.989009001 |
| 0.044333333  | -0.015966667 | 0.988993767 |
| 0.058733333  | -0.015988889 | 0.988978533 |
| 0.201733333  | -0.016       | 0.988970916 |
| -0.290433333 | -0.0161      | 0.988902369 |
| -0.067833333 | -0.016111111 | 0.988894752 |
| 0.079766667  | -0.016122222 | 0.988887136 |
| 0.058766667  | -0.016133333 | 0.98887952  |
| -0.003466667 | -0.016244444 | 0.988803363 |
| 0.2267       | -0.016244444 | 0.988803363 |

|              |              |             |
|--------------|--------------|-------------|
| 0.000833333  | -0.016255556 | 0.988795748 |
| 0.042266667  | -0.016344444 | 0.988734827 |
| -0.0904      | -0.016355556 | 0.988727212 |
| -0.059566667 | -0.016355556 | 0.988727212 |
| 0.1112       | -0.016355556 | 0.988727212 |
| -0.087933333 | -0.016366667 | 0.988719597 |
| 0.0465       | -0.016366667 | 0.988719597 |
| 0.038233333  | -0.016422222 | 0.988681524 |
| 0.049433333  | -0.016533333 | 0.988605383 |
| 0.048233333  | -0.0166      | 0.9885597   |
| 0.016433333  | -0.0166      | 0.9885597   |
| -0.336933333 | -0.016677778 | 0.988506407 |
| -0.132433333 | -0.0167      | 0.988491181 |
| -0.119166667 | -0.0167      | 0.988491181 |
| -0.0441      | -0.016722222 | 0.988475955 |
| -0.237       | -0.016733333 | 0.988468342 |
| 0.1094       | -0.016777778 | 0.988437892 |
| 0.115233333  | -0.016777778 | 0.988437892 |
| -0.048333333 | -0.016877778 | 0.988369381 |
| 0.0962       | -0.0169      | 0.988354157 |
| 0.049933333  | -0.016988889 | 0.988293263 |
| -0.023733333 | -0.017022222 | 0.988270429 |
| -0.139066667 | -0.017044444 | 0.988255206 |
| -0.183633333 | -0.017044444 | 0.988255206 |
| 0.120333333  | -0.017055556 | 0.988247595 |
| -0.0064      | -0.017077778 | 0.988232373 |
| 0.1111       | -0.017077778 | 0.988232373 |
| -0.122333333 | -0.017111111 | 0.98820954  |
| -0.074366667 | -0.0172      | 0.988148656 |
| -0.207933333 | -0.017211111 | 0.988141045 |
| 0.036766667  | -0.017244444 | 0.988118215 |
| 0.0315       | -0.017288889 | 0.988087775 |
| -0.0069      | -0.017322222 | 0.988064945 |
| -0.069433333 | -0.017344444 | 0.988049726 |
| -0.165966667 | -0.017366667 | 0.988034507 |
| 0.057633333  | -0.017377778 | 0.988026897 |
| 0.055533333  | -0.017422222 | 0.98799646  |
| 0.047433333  | -0.017422222 | 0.98799646  |
| 0.058666667  | -0.017455556 | 0.987973633 |
| -0.0662      | -0.017488889 | 0.987950806 |
| -0.058566667 | -0.017522222 | 0.98792798  |
| -0.057633333 | -0.017533333 | 0.987920371 |
| -0.1481      | -0.017555556 | 0.987905154 |
| 0.1575       | -0.017566667 | 0.987897546 |
| -0.005866667 | -0.017611111 | 0.987867112 |
| -0.250433333 | -0.017611111 | 0.987867112 |
| -0.069933333 | -0.017677778 | 0.987821464 |



|              |              |             |
|--------------|--------------|-------------|
| -0.179733333 | -0.017688889 | 0.987813856 |
| 0.176533333  | -0.017722222 | 0.987791033 |
| -0.129533333 | -0.017733333 | 0.987783426 |
| -0.129366667 | -0.017733333 | 0.987783426 |
| 0.2506       | -0.017777778 | 0.987752996 |
| -0.122166667 | -0.017788889 | 0.987745389 |
| -0.021366667 | -0.017822222 | 0.987722567 |
| -0.037466667 | -0.017844444 | 0.987707353 |
| 0.132633333  | -0.017922222 | 0.987654106 |
| -0.127033333 | -0.017966667 | 0.98762368  |
| -0.0481      | -0.017966667 | 0.98762368  |
| -0.0093      | -0.017988889 | 0.987608468 |
| -0.123133333 | -0.017988889 | 0.987608468 |
| -0.005733333 | -0.018022222 | 0.987585649 |
| -0.1552      | -0.018066667 | 0.987555226 |
| 0.0662       | -0.0181      | 0.987532409 |
| -0.094133333 | -0.0181      | 0.987532409 |
| 0.065966667  | -0.018277778 | 0.987410726 |
| -0.0591      | -0.018288889 | 0.987403122 |
| -0.006533333 | -0.018466667 | 0.987281455 |
| 0.019933333  | -0.018477778 | 0.987273852 |
| -0.042733333 | -0.018544444 | 0.987228231 |
| 0.043433333  | -0.018566667 | 0.987213024 |
| -0.062466667 | -0.018633333 | 0.987167407 |
| 0.0161       | -0.018666667 | 0.987144598 |
| 0.0143       | -0.018677778 | 0.987136996 |
| -0.197933333 | -0.018711111 | 0.987114188 |
| 0.0129       | -0.018711111 | 0.987114188 |
| 0.0972       | -0.018766667 | 0.987076177 |
| -0.193366667 | -0.018922222 | 0.986969753 |
| -0.093633333 | -0.018955556 | 0.98694695  |
| -0.0161      | -0.018955556 | 0.98694695  |
| 0.165166667  | -0.018966667 | 0.986939349 |
| -0.194266667 | -0.018988889 | 0.986924147 |
| -0.127233333 | -0.018988889 | 0.986924147 |
| -0.022933333 | -0.019       | 0.986916546 |
| -0.078433333 | -0.019011111 | 0.986908945 |
| 0.075433333  | -0.019011111 | 0.986908945 |
| -0.1241      | -0.019033333 | 0.986893744 |
| 0.046233333  | -0.019033333 | 0.986893744 |
| 0.0729       | -0.019055556 | 0.986878542 |
| 0.125233333  | -0.019055556 | 0.986878542 |
| 0.114033333  | -0.019066667 | 0.986870942 |
| -0.0711      | -0.019133333 | 0.98682534  |
| 0.102933333  | -0.019211111 | 0.98677214  |
| 0.005366667  | -0.019255556 | 0.986741741 |
| -0.024333333 | -0.0193      | 0.986711344 |

|              |              |             |
|--------------|--------------|-------------|
| 0.0069       | -0.019388889 | 0.986650551 |
| -0.078933333 | -0.019422222 | 0.986627755 |
| 0.024133333  | -0.019433333 | 0.986620156 |
| -0.035866667 | -0.019455556 | 0.986604959 |
| 0.183166667  | -0.019466667 | 0.986597361 |
| 0.043033333  | -0.019488889 | 0.986582164 |
| 0.088766667  | -0.019522222 | 0.98655937  |
| 0.1251       | -0.019544444 | 0.986544173 |
| -0.015833333 | -0.019644444 | 0.986475794 |
| -0.1548      | -0.019655556 | 0.986468196 |
| 0.105333333  | -0.019744444 | 0.986407419 |
| -0.088166667 | -0.019755556 | 0.986399822 |
| -0.035133333 | -0.019888889 | 0.986308663 |
| 0.1137       | -0.019944444 | 0.986270683 |
| 0.0031       | -0.019966667 | 0.986255492 |
| 0.086        | -0.02        | 0.986232704 |
| -0.079933333 | -0.020044444 | 0.986202323 |
| 0.0812       | -0.020044444 | 0.986202323 |
| -0.0085      | -0.020133333 | 0.986141561 |
| -0.022766667 | -0.020166667 | 0.986118777 |
| -0.082733333 | -0.020211111 | 0.986088399 |
| 0.0265       | -0.020255556 | 0.986058021 |
| 0.0514       | -0.020266667 | 0.986050427 |
| -0.018       | -0.020366667 | 0.985982081 |
| -0.048466667 | -0.020477778 | 0.985906148 |
| -0.084033333 | -0.020522222 | 0.985875776 |
| -0.061566667 | -0.020533333 | 0.985868183 |
| 0.190566667  | -0.020555556 | 0.985852997 |
| -0.101166667 | -0.020555556 | 0.985852997 |
| -0.0118      | -0.020577778 | 0.985837812 |
| 0.119466667  | -0.020588889 | 0.98583022  |
| 0.109566667  | -0.020633333 | 0.98579985  |
| 0.015866667  | -0.020644444 | 0.985792258 |
| -0.1027      | -0.020677778 | 0.985769481 |
| -0.170733333 | -0.020722222 | 0.985739114 |
| 0.0225       | -0.020766667 | 0.985708747 |
| 0.000766667  | -0.020911111 | 0.985610062 |
| 0.172933333  | -0.020922222 | 0.985602471 |
| 0.004133333  | -0.021033333 | 0.985526566 |
| -0.081333333 | -0.021033333 | 0.985526566 |
| -0.102366667 | -0.021077778 | 0.985496206 |
| 0.166366667  | -0.0211      | 0.985481026 |
| 0.070233333  | -0.021122222 | 0.985465847 |
| -0.124033333 | -0.021188889 | 0.98542031  |
| 0.203266667  | -0.021233333 | 0.985389953 |
| -0.1251      | -0.021233333 | 0.985389953 |
| 0.028733333  | -0.021233333 | 0.985389953 |

|              |              |             |
|--------------|--------------|-------------|
| 0.001633333  | -0.021233333 | 0.985389953 |
| -0.1023      | -0.0213      | 0.985344419 |
| -0.141866667 | -0.0213      | 0.985344419 |
| -0.096433333 | -0.021322222 | 0.985329242 |
| 0.3267       | -0.021388889 | 0.985283711 |
| -0.0213      | -0.021444444 | 0.98524577  |
| -0.1285      | -0.021466667 | 0.985230594 |
| 0.0637       | -0.021466667 | 0.985230594 |
| 0.000333333  | -0.021477778 | 0.985223006 |
| 0.0362       | -0.021555556 | 0.985169893 |
| 0.0853       | -0.021577778 | 0.985154718 |
| 0.035066667  | -0.021588889 | 0.985147131 |
| -0.070266667 | -0.021611111 | 0.985131957 |
| 0.0058       | -0.021722222 | 0.985056088 |
| 0.047566667  | -0.021766667 | 0.985025743 |
| -0.0342      | -0.021777778 | 0.985018156 |
| -0.1112      | -0.021777778 | 0.985018156 |
| 0.0931       | -0.021855556 | 0.984965054 |
| -0.3282      | -0.021933333 | 0.984911954 |
| 0.1581       | -0.021966667 | 0.984889198 |
| -0.0819      | -0.021966667 | 0.984889198 |
| 0.208533333  | -0.021977778 | 0.984881613 |
| 0.028433333  | -0.022022222 | 0.984851273 |
| -0.046766667 | -0.022044444 | 0.984836103 |
| 0.0139       | -0.022133333 | 0.984775426 |
| 0.100166667  | -0.022255556 | 0.984692001 |
| -0.0102      | -0.022255556 | 0.984692001 |
| -0.1012      | -0.022255556 | 0.984692001 |
| 0.111133333  | -0.022311111 | 0.984654083 |
| -0.102033333 | -0.022311111 | 0.984654083 |
| -0.0434      | -0.022311111 | 0.984654083 |
| -0.115       | -0.022344444 | 0.984631333 |
| -0.0976      | -0.022388889 | 0.984601001 |
| 0.0196       | -0.022388889 | 0.984601001 |
| -0.0554      | -0.022411111 | 0.984585835 |
| 0.1109       | -0.022422222 | 0.984578252 |
| -0.477433333 | -0.022444444 | 0.984563086 |
| 0.0076       | -0.022477778 | 0.984540338 |
| -0.241966667 | -0.022511111 | 0.984517591 |
| 0.0368       | -0.022511111 | 0.984517591 |
| -0.338066667 | -0.022522222 | 0.984510009 |
| -0.047       | -0.022555556 | 0.984487262 |
| 0.013066667  | -0.022566667 | 0.98447968  |
| 0.085433333  | -0.0226      | 0.984456934 |
| 0.064133333  | -0.022611111 | 0.984449352 |
| -0.029633333 | -0.022677778 | 0.984403862 |
| 0.0379       | -0.022711111 | 0.984381117 |

|              |              |             |
|--------------|--------------|-------------|
| 0.014266667  | -0.022711111 | 0.984381117 |
| 0.006466667  | -0.022733333 | 0.984365955 |
| -0.145933333 | -0.022777778 | 0.98433563  |
| 0.034866667  | -0.022777778 | 0.98433563  |
| -0.0829      | -0.022788889 | 0.984328049 |
| -0.010366667 | -0.0229      | 0.984252243 |
| -0.105833333 | -0.022977778 | 0.984199182 |
| 0.004266667  | -0.023011111 | 0.984176442 |
| 0.027466667  | -0.023055556 | 0.984146124 |
| 0.0056       | -0.023066667 | 0.984138544 |
| -0.056033333 | -0.023088889 | 0.984123385 |
| -0.152866667 | -0.023155556 | 0.98407791  |
| 0.056566667  | -0.0232      | 0.984047595 |
| 0.109366667  | -0.023233333 | 0.984024859 |
| -0.0032      | -0.023233333 | 0.984024859 |
| -0.0269      | -0.023255556 | 0.984009701 |
| -0.060333333 | -0.023255556 | 0.984009701 |
| -0.0685      | -0.023266667 | 0.984002123 |
| -0.0313      | -0.023377778 | 0.983926342 |
| -0.063033333 | -0.023433333 | 0.983888453 |
| -0.036633333 | -0.023511111 | 0.983835412 |
| -0.087566667 | -0.023522222 | 0.983827835 |
| 0.104033333  | -0.023566667 | 0.983797527 |
| 0.0501       | -0.023611111 | 0.98376722  |
| -0.1436      | -0.023622222 | 0.983759643 |
| 0.0778       | -0.023655556 | 0.983736914 |
| -0.057066667 | -0.023655556 | 0.983736914 |
| 0.042766667  | -0.023677778 | 0.983721761 |
| -0.147733333 | -0.023722222 | 0.983691457 |
| -0.046133333 | -0.023744444 | 0.983676305 |
| -0.169733333 | -0.023744444 | 0.983676305 |
| 0.075333333  | -0.0238      | 0.983638426 |
| 0.0049       | -0.023833333 | 0.983615699 |
| -0.092366667 | -0.023844444 | 0.983608124 |
| -0.0799      | -0.0239      | 0.983570248 |
| 0.049433333  | -0.023933333 | 0.983547523 |
| 0.094666667  | -0.024088889 | 0.983441479 |
| -0.0851      | -0.024088889 | 0.983441479 |
| -0.057       | -0.024133333 | 0.983411183 |
| 0.0703       | -0.024144444 | 0.983403609 |
| -0.079233333 | -0.024155556 | 0.983396036 |
| 0.0218       | -0.024188889 | 0.983373315 |
| -0.068866667 | -0.024266667 | 0.983320301 |
| 0.058        | -0.0243      | 0.983297582 |
| -0.094633333 | -0.024322222 | 0.983282436 |
| -0.0159      | -0.024322222 | 0.983282436 |
| -0.149766667 | -0.0244      | 0.983229427 |

|              |              |             |
|--------------|--------------|-------------|
| -0.019633333 | -0.024411111 | 0.983221855 |
| -0.044233333 | -0.024433333 | 0.98320671  |
| 0.108133333  | -0.024455556 | 0.983191566 |
| 0.085066667  | -0.024455556 | 0.983191566 |
| 0.058366667  | -0.024466667 | 0.983183993 |
| 0.048433333  | -0.024522222 | 0.983146133 |
| 0.1667       | -0.024544444 | 0.98313099  |
| -0.3466      | -0.024566667 | 0.983115847 |
| 0.001566667  | -0.0246      | 0.983093132 |
| 0.122266667  | -0.024633333 | 0.983070418 |
| -0.009266667 | -0.024644444 | 0.983062847 |
| -0.099966667 | -0.024677778 | 0.983040134 |
| -0.1364      | -0.024688889 | 0.983032563 |
| 0.041166667  | -0.024711111 | 0.983017421 |
| -0.118833333 | -0.024722222 | 0.98300985  |
| 0.079966667  | -0.024722222 | 0.98300985  |
| 0.0487       | -0.024744444 | 0.982994708 |
| -0.071566667 | -0.0248      | 0.982956856 |
| -0.0249      | -0.024822222 | 0.982941715 |
| 0.155533333  | -0.0249      | 0.982888725 |
| 0.065        | -0.024977778 | 0.982835737 |
| -0.054433333 | -0.025033333 | 0.982797891 |
| -0.263833333 | -0.025044444 | 0.982790322 |
| -0.089233333 | -0.025111111 | 0.982744908 |
| 0.040233333  | -0.025155556 | 0.982714634 |
| -0.6268      | -0.025166667 | 0.982707065 |
| 0.007966667  | -0.025222222 | 0.982669224 |
| -0.200666667 | -0.025255556 | 0.982646519 |
| -0.155166667 | -0.025344444 | 0.982585977 |
| -0.275066667 | -0.025344444 | 0.982585977 |
| 0.077333333  | -0.0254      | 0.982548141 |
| -0.045033333 | -0.025411111 | 0.982540573 |
| 0.035766667  | -0.025422222 | 0.982533006 |
| -0.017266667 | -0.025477778 | 0.982495171 |
| -0.1593      | -0.0255      | 0.982480038 |
| 0.225366667  | -0.025577778 | 0.982427072 |
| -0.035966667 | -0.025588889 | 0.982419506 |
| -0.074       | -0.025588889 | 0.982419506 |
| 0.015433333  | -0.025588889 | 0.982419506 |
| 0.143733333  | -0.025644444 | 0.982381676 |
| 0.1591       | -0.025711111 | 0.982336281 |
| 0.032933333  | -0.025722222 | 0.982328715 |
| 0.0618       | -0.025722222 | 0.982328715 |
| 0.113766667  | -0.025744444 | 0.982313585 |
| 0.113533333  | -0.025766667 | 0.982298454 |
| 0.007433333  | -0.025811111 | 0.982268193 |
| 0.014366667  | -0.025866667 | 0.982230368 |

|              |              |             |
|--------------|--------------|-------------|
| -0.0267      | -0.025877778 | 0.982222804 |
| 0.0191       | -0.025911111 | 0.98220011  |
| -0.028366667 | -0.025911111 | 0.98220011  |
| 0.0648       | -0.025922222 | 0.982192545 |
| -0.045266667 | -0.025944444 | 0.982177416 |
| 0.0598       | -0.026055556 | 0.982101776 |
| 0.056133333  | -0.026066667 | 0.982094212 |
| -0.207066667 | -0.026077778 | 0.982086648 |
| 0.071433333  | -0.026088889 | 0.982079084 |
| 0.071933333  | -0.026144444 | 0.982041267 |
| 0.0317       | -0.026144444 | 0.982041267 |
| -0.3755      | -0.026188889 | 0.982011014 |
| -0.0195      | -0.026266667 | 0.981958074 |
| -0.155466667 | -0.026277778 | 0.981950511 |
| 0.279533333  | -0.026288889 | 0.981942949 |
| -0.059633333 | -0.026333333 | 0.981912699 |
| -0.025833333 | -0.026477778 | 0.981814394 |
| -0.023933333 | -0.0265      | 0.981799271 |
| 0.074833333  | -0.0265      | 0.981799271 |
| -0.0245      | -0.026544444 | 0.981769025 |
| -0.2179      | -0.026544444 | 0.981769025 |
| -0.149933333 | -0.026566667 | 0.981753903 |
| -0.008766667 | -0.026566667 | 0.981753903 |
| -0.084266667 | -0.026633333 | 0.981708537 |
| 0.0891       | -0.026666667 | 0.981685855 |
| -0.0879      | -0.026722222 | 0.981648053 |
| 0.0922       | -0.026722222 | 0.981648053 |
| -0.081733333 | -0.026744444 | 0.981632933 |
| -0.0457      | -0.026777778 | 0.981610252 |
| 0.060366667  | -0.026788889 | 0.981602692 |
| 0.055766667  | -0.026822222 | 0.981580013 |
| -0.238266667 | -0.026833333 | 0.981572453 |
| 0.0766       | -0.026833333 | 0.981572453 |
| -0.018766667 | -0.026855556 | 0.981557334 |
| -0.019733333 | -0.026866667 | 0.981549774 |
| 0.001866667  | -0.026877778 | 0.981542215 |
| 0.200666667  | -0.0269      | 0.981527096 |
| 0.051133333  | -0.026922222 | 0.981511977 |
| -0.170866667 | -0.027033333 | 0.981436388 |
| 0.044766667  | -0.027055556 | 0.98142127  |
| -0.0806      | -0.027111111 | 0.981383478 |
| -0.1036      | -0.027133333 | 0.981368362 |
| -0.043933333 | -0.027144444 | 0.981360804 |
| -0.1518      | -0.027188889 | 0.981330572 |
| -0.053633333 | -0.027222222 | 0.981307899 |
| -0.060133333 | -0.027244444 | 0.981292783 |
| -0.240466667 | -0.027244444 | 0.981292783 |

|              |              |             |
|--------------|--------------|-------------|
| -0.205666667 | -0.027255556 | 0.981285226 |
| 0.1488       | -0.027366667 | 0.981209654 |
| -0.0956      | -0.027388889 | 0.98119454  |
| -0.0039      | -0.027422222 | 0.98117187  |
| 0.050733333  | -0.027433333 | 0.981164313 |
| -0.2294      | -0.027433333 | 0.981164313 |
| 0.046466667  | -0.027444444 | 0.981156757 |
| 0.085233333  | -0.0275      | 0.981118975 |
| 0.0069       | -0.027577778 | 0.981066083 |
| -0.033233333 | -0.027644444 | 0.981020749 |
| 0.067633333  | -0.027722222 | 0.980967862 |
| -0.111566667 | -0.027733333 | 0.980960307 |
| -0.028966667 | -0.027811111 | 0.980907424 |
| 0.0452       | -0.027844444 | 0.98088476  |
| -0.159666667 | -0.027866667 | 0.980869651 |
| 0.0957       | -0.027866667 | 0.980869651 |
| 0.016133333  | -0.027922222 | 0.980831881 |
| 0.065533333  | -0.027922222 | 0.980831881 |
| -0.0832      | -0.028       | 0.980779004 |
| 0.0464       | -0.028011111 | 0.98077145  |
| -0.017866667 | -0.028044444 | 0.98074879  |
| -0.026166667 | -0.028044444 | 0.98074879  |
| -0.1064      | -0.028055556 | 0.980741237 |
| -0.038833333 | -0.028133333 | 0.980688365 |
| 0.044333333  | -0.028155556 | 0.980673259 |
| 0.0653       | -0.028166667 | 0.980665706 |
| -0.275566667 | -0.028177778 | 0.980658154 |
| 0.090133333  | -0.0282      | 0.980643049 |
| 0.051266667  | -0.028211111 | 0.980635496 |
| 0.0655       | -0.028222222 | 0.980627944 |
| -0.0572      | -0.028233333 | 0.980620391 |
| 0.030766667  | -0.028333333 | 0.980552422 |
| 0.020466667  | -0.028355556 | 0.980537319 |
| -0.067933333 | -0.028422222 | 0.980492009 |
| 0.013133333  | -0.028433333 | 0.980484458 |
| 0.08         | -0.028455556 | 0.980469355 |
| -0.150166667 | -0.028466667 | 0.980461804 |
| 0.125633333  | -0.028466667 | 0.980461804 |
| -0.0214      | -0.0285      | 0.980439151 |
| -0.172066667 | -0.0285      | 0.980439151 |
| -0.027866667 | -0.0285      | 0.980439151 |
| 0.0628       | -0.028522222 | 0.980424049 |
| -0.003633333 | -0.028533333 | 0.980416498 |
| -0.102333333 | -0.028555556 | 0.980401397 |
| -0.007566667 | -0.028611111 | 0.980363644 |
| -0.013833333 | -0.028633333 | 0.980348543 |
| -0.0666      | -0.028655556 | 0.980333443 |

|              |              |             |
|--------------|--------------|-------------|
| -0.0298      | -0.028666667 | 0.980325893 |
| -0.0188      | -0.028666667 | 0.980325893 |
| -0.132266667 | -0.0287      | 0.980303242 |
| 0.020833333  | -0.028711111 | 0.980295693 |
| -0.060166667 | -0.028722222 | 0.980288143 |
| -0.320533333 | -0.028744444 | 0.980273043 |
| -0.054       | -0.028811111 | 0.980227746 |
| 0.027233333  | -0.028822222 | 0.980220197 |
| 0.001166667  | -0.028855556 | 0.980197549 |
| 0.009233333  | -0.028866667 | 0.98019     |
| -0.057733333 | -0.028888889 | 0.980174902 |
| 0.160433333  | -0.028933333 | 0.980144707 |
| -0.160533333 | -0.028955556 | 0.980129609 |
| -0.0381      | -0.028977778 | 0.980114512 |
| -0.0166      | -0.029044444 | 0.980069222 |
| -0.121533333 | -0.029077778 | 0.980046578 |
| -0.043733333 | -0.029077778 | 0.980046578 |
| 0.106566667  | -0.029088889 | 0.98003903  |
| -0.0814      | -0.029133333 | 0.980008839 |
| 0.008266667  | -0.029188889 | 0.979971101 |
| 0.016133333  | -0.029188889 | 0.979971101 |
| 0.078433333  | -0.0292      | 0.979963554 |
| 0.153866667  | -0.029222222 | 0.97994846  |
| -0.3957      | -0.029288889 | 0.979903177 |
| 0.061566667  | -0.0294      | 0.979827712 |
| -0.050633333 | -0.029455556 | 0.979789981 |
| 0.078133333  | -0.029466667 | 0.979782435 |
| -0.065833333 | -0.029522222 | 0.979744706 |
| 0.1239       | -0.029566667 | 0.979714524 |
| -0.175166667 | -0.029577778 | 0.979706979 |
| -0.1705      | -0.029577778 | 0.979706979 |
| -0.0628      | -0.029622222 | 0.979676798 |
| -0.0694      | -0.029622222 | 0.979676798 |
| -0.184033333 | -0.0298      | 0.979556083 |
| 0.088033333  | -0.029811111 | 0.979548539 |
| -0.2421      | -0.029833333 | 0.979533451 |
| -0.058133333 | -0.029844444 | 0.979525907 |
| 0.2056       | -0.029866667 | 0.979510819 |
| 0.068133333  | -0.0299      | 0.979488188 |
| -0.1242      | -0.029911111 | 0.979480645 |
| -0.056133333 | -0.029933333 | 0.979465557 |
| 0.1102       | -0.029933333 | 0.979465557 |
| -0.055266667 | -0.029988889 | 0.979427841 |
| -0.065133333 | -0.030077778 | 0.979367497 |
| -0.120533333 | -0.030088889 | 0.979359954 |
| -0.076566667 | -0.030111111 | 0.979344869 |
| -0.109466667 | -0.030144444 | 0.979322242 |



|              |              |             |
|--------------|--------------|-------------|
| -0.108033333 | -0.030166667 | 0.979307157 |
| -0.040233333 | -0.030311111 | 0.979209112 |
| -0.1509      | -0.030322222 | 0.979201571 |
| -0.061666667 | -0.030355556 | 0.979178947 |
| -0.017833333 | -0.030422222 | 0.9791337   |
| 0.032866667  | -0.030466667 | 0.979103537 |
| -0.1192      | -0.0305      | 0.979080915 |
| 0            | -0.0305      | 0.979080915 |
| -0.0112      | -0.030533333 | 0.979058294 |
| 0.185933333  | -0.030555556 | 0.979043213 |
| 0.105633333  | -0.030588889 | 0.979020593 |
| 0.0041       | -0.0306      | 0.979013053 |
| 0.191233333  | -0.0306      | 0.979013053 |
| -0.231966667 | -0.030622222 | 0.978997973 |
| -0.097833333 | -0.030677778 | 0.978960274 |
| -0.5402      | -0.0307      | 0.978945195 |
| 0.063133333  | -0.030711111 | 0.978937656 |
| -0.074433333 | -0.030711111 | 0.978937656 |
| -0.139133333 | -0.0309      | 0.978809494 |
| -0.009566667 | -0.0309      | 0.978809494 |
| 0.1431       | -0.030933333 | 0.978786879 |
| 0.0514       | -0.030988889 | 0.978749188 |
| -0.100533333 | -0.031055556 | 0.978703962 |
| 0.040166667  | -0.031166667 | 0.978628588 |
| -0.029833333 | -0.031166667 | 0.978628588 |
| 0.0502       | -0.0312      | 0.978605977 |
| -0.054866667 | -0.031233333 | 0.978583367 |
| -0.4579      | -0.031288889 | 0.978545684 |
| -0.045566667 | -0.0313      | 0.978538148 |
| -0.0392      | -0.031311111 | 0.978530612 |
| -0.063666667 | -0.031311111 | 0.978530612 |
| -0.125833333 | -0.031388889 | 0.978477859 |
| 0.045233333  | -0.031466667 | 0.978425109 |
| 0.066766667  | -0.031477778 | 0.978417574 |
| 0.036733333  | -0.031477778 | 0.978417574 |
| 0.0704       | -0.031522222 | 0.978387433 |
| -0.062966667 | -0.031544444 | 0.978372362 |
| -0.0611      | -0.031588889 | 0.978342223 |
| 0.072333333  | -0.031622222 | 0.978319618 |
| -0.014866667 | -0.031677778 | 0.978281946 |
| -0.040433333 | -0.0317      | 0.978266877 |
| 0.0607       | -0.031722222 | 0.978251809 |
| -0.0389      | -0.031733333 | 0.978244275 |
| -0.158633333 | -0.031744444 | 0.978236741 |
| -0.095133333 | -0.031833333 | 0.97817647  |
| 0.011433333  | -0.0319      | 0.97813127  |
| -0.0109      | -0.031911111 | 0.978123737 |

|              |              |             |
|--------------|--------------|-------------|
| 0.012333333  | -0.031922222 | 0.978116204 |
| 0.055466667  | -0.031933333 | 0.978108671 |
| 0.105033333  | -0.031933333 | 0.978108671 |
| -0.1177      | -0.031944444 | 0.978101138 |
| -0.0049      | -0.031955556 | 0.978093605 |
| -0.036633333 | -0.031977778 | 0.978078539 |
| 0.161        | -0.031977778 | 0.978078539 |
| 0.069766667  | -0.031988889 | 0.978071006 |
| -0.155966667 | -0.032077778 | 0.978010746 |
| 0.165433333  | -0.0321      | 0.977995682 |
| 0.0597       | -0.032133333 | 0.977973085 |
| -0.014366667 | -0.032155556 | 0.977958021 |
| 0.0453       | -0.032188889 | 0.977935426 |
| -0.0337      | -0.032211111 | 0.977920363 |
| 0.008533333  | -0.032277778 | 0.977875174 |
| 0.2619       | -0.032311111 | 0.977852581 |
| -0.088533333 | -0.032311111 | 0.977852581 |
| 0.098966667  | -0.032333333 | 0.977837519 |
| -0.028933333 | -0.032333333 | 0.977837519 |
| -0.0126      | -0.032388889 | 0.977799865 |
| 0.075333333  | -0.0324      | 0.977792334 |
| 0.045866667  | -0.032433333 | 0.977769743 |
| -0.093966667 | -0.032433333 | 0.977769743 |
| -0.112633333 | -0.032444444 | 0.977762212 |
| -0.160666667 | -0.032455556 | 0.977754682 |
| 0.085733333  | -0.032488889 | 0.977732091 |
| 0.0141       | -0.032522222 | 0.977709501 |
| -0.273433333 | -0.032588889 | 0.977664322 |
| 0.043033333  | -0.032611111 | 0.977649263 |
| -0.0862      | -0.032633333 | 0.977634204 |
| 0.1669       | -0.032677778 | 0.977604087 |
| -0.176066667 | -0.032711111 | 0.9775815   |
| -0.018233333 | -0.032722222 | 0.977573971 |
| -0.056966667 | -0.032744444 | 0.977558914 |
| -0.04        | -0.0328      | 0.97752127  |
| -0.000833333 | -0.032811111 | 0.977513742 |
| 0.067166667  | -0.032833333 | 0.977498685 |
| 0.032533333  | -0.032833333 | 0.977498685 |
| -0.090933333 | -0.032844444 | 0.977491157 |
| -0.106933333 | -0.032888889 | 0.977461044 |
| -0.043633333 | -0.032911111 | 0.977445988 |
| -0.083266667 | -0.033066667 | 0.977340603 |
| 0.0832       | -0.033066667 | 0.977340603 |
| 0.0541       | -0.0331      | 0.977318022 |
| -0.070266667 | -0.033155556 | 0.977280388 |
| 0.009033333  | -0.033155556 | 0.977280388 |
| 0.045366667  | -0.033188889 | 0.977257808 |

|              |              |             |
|--------------|--------------|-------------|
| 0.025833333  | -0.033266667 | 0.977205124 |
| -0.127066667 | -0.033333333 | 0.977159968 |
| -0.0419      | -0.033522222 | 0.977032039 |
| -0.074       | -0.033577778 | 0.976994416 |
| 0.042366667  | -0.033577778 | 0.976994416 |
| 0.062466667  | -0.033588889 | 0.976986892 |
| 0.0962       | -0.033588889 | 0.976986892 |
| 0.167466667  | -0.033588889 | 0.976986892 |
| -0.167133333 | -0.0336      | 0.976979368 |
| 0.142533333  | -0.033733333 | 0.97688908  |
| 0.329933333  | -0.033766667 | 0.976866509 |
| 0.061233333  | -0.0338      | 0.976843939 |
| 0.0172       | -0.033866667 | 0.9767988   |
| -0.131866667 | -0.033911111 | 0.976768709 |
| -0.1629      | -0.033988889 | 0.976716051 |
| -0.193633333 | -0.034       | 0.976708529 |
| 0.0789       | -0.034       | 0.976708529 |
| 0.075566667  | -0.034033333 | 0.976685962 |
| -0.0399      | -0.034088889 | 0.976648353 |
| 0.1818       | -0.034133333 | 0.976618266 |
| -0.0755      | -0.034144444 | 0.976610745 |
| -0.1431      | -0.034188889 | 0.976580659 |
| -0.0734      | -0.034233333 | 0.976550574 |
| -0.188033333 | -0.034455556 | 0.976400165 |
| -0.134833333 | -0.034455556 | 0.976400165 |
| 0.0309       | -0.034455556 | 0.976400165 |
| -0.217566667 | -0.0345      | 0.976370086 |
| -0.053133333 | -0.034544444 | 0.976340008 |
| -0.097966667 | -0.034633333 | 0.976279855 |
| -0.0978      | -0.034666667 | 0.976257298 |
| -0.134366667 | -0.034777778 | 0.976182113 |
| 0.236066667  | -0.034788889 | 0.976174595 |
| 0.083733333  | -0.034788889 | 0.976174595 |
| -0.0565      | -0.034788889 | 0.976174595 |
| 0.184        | -0.034833333 | 0.976144523 |
| 0.025733333  | -0.034866667 | 0.976121969 |
| -0.1728      | -0.034888889 | 0.976106934 |
| -0.086833333 | -0.034888889 | 0.976106934 |
| -0.067733333 | -0.034888889 | 0.976106934 |
| -0.001833333 | -0.034911111 | 0.976091899 |
| 0.120366667  | -0.034977778 | 0.976046795 |
| 0.082533333  | -0.034977778 | 0.976046795 |
| -0.0849      | -0.035044444 | 0.976001693 |
| 0.039        | -0.035077778 | 0.975979143 |
| 0.208        | -0.035088889 | 0.975971626 |
| -0.144866667 | -0.035111111 | 0.975956593 |
| 0.0072       | -0.035188889 | 0.975903979 |

|              |              |             |
|--------------|--------------|-------------|
| -0.114466667 | -0.035211111 | 0.975888947 |
| 0.086766667  | -0.035244444 | 0.9758664   |
| -0.008866667 | -0.035255556 | 0.975858884 |
| -0.2077      | -0.035322222 | 0.975813791 |
| -0.141       | -0.035322222 | 0.975813791 |
| 0.0733       | -0.035333333 | 0.975806276 |
| -0.0526      | -0.035444444 | 0.975731125 |
| 0.0906       | -0.035477778 | 0.975708582 |
| -0.029233333 | -0.035488889 | 0.975701067 |
| 0.118266667  | -0.035533333 | 0.97567101  |
| -0.2205      | -0.035533333 | 0.97567101  |
| -0.2347      | -0.0357      | 0.975558302 |
| 0.0518       | -0.035711111 | 0.975550789 |
| -0.1791      | -0.035711111 | 0.975550789 |
| 0.039466667  | -0.035766667 | 0.975513223 |
| -0.082666667 | -0.035788889 | 0.975498197 |
| -0.175333333 | -0.0358      | 0.975490684 |
| 0.038033333  | -0.0358      | 0.975490684 |
| 0.091566667  | -0.035822222 | 0.975475658 |
| -0.0275      | -0.035877778 | 0.975438095 |
| -0.132333333 | -0.036033333 | 0.975332926 |
| 0.4138       | -0.036055556 | 0.975317903 |
| -0.121366667 | -0.036077778 | 0.97530288  |
| 0.0034       | -0.036122222 | 0.975272835 |
| -0.076833333 | -0.036166667 | 0.975242791 |
| -0.1309      | -0.036166667 | 0.975242791 |
| 0.017966667  | -0.036177778 | 0.97523528  |
| 0.169833333  | -0.0362      | 0.975220258 |
| -0.1054      | -0.036222222 | 0.975205236 |
| 0.0962       | -0.036233333 | 0.975197726 |
| -0.036233333 | -0.036255556 | 0.975182705 |
| -0.066066667 | -0.036277778 | 0.975167684 |
| 0.125566667  | -0.036288889 | 0.975160173 |
| -0.461433333 | -0.036477778 | 0.975032506 |
| -0.1501      | -0.036555556 | 0.974979942 |
| -0.067533333 | -0.036566667 | 0.974972433 |
| -0.073933333 | -0.036577778 | 0.974964924 |
| -0.048933333 | -0.0366      | 0.974949907 |
| -0.109       | -0.036644444 | 0.974919873 |
| -0.1192      | -0.036655556 | 0.974912364 |
| 0.1118       | -0.036722222 | 0.974867315 |
| -0.033466667 | -0.036744444 | 0.974852299 |
| -0.0466      | -0.036744444 | 0.974852299 |
| -0.036933333 | -0.036755556 | 0.974844791 |
| 0.3603       | -0.036755556 | 0.974844791 |
| -0.022466667 | -0.036755556 | 0.974844791 |
| 0.072966667  | -0.036766667 | 0.974837283 |

|              |              |             |
|--------------|--------------|-------------|
| 0.1          | -0.036766667 | 0.974837283 |
| -0.151833333 | -0.0368      | 0.97481476  |
| 0.006366667  | -0.036844444 | 0.974784729 |
| -0.059666667 | -0.036855556 | 0.974777222 |
| -0.1164      | -0.036911111 | 0.974739686 |
| -0.023566667 | -0.036933333 | 0.974724672 |
| -0.288766667 | -0.036944444 | 0.974717165 |
| -0.020466667 | -0.036955556 | 0.974709658 |
| -0.261533333 | -0.037044444 | 0.974649605 |
| 0.261033333  | -0.037155556 | 0.974574544 |
| 0.055866667  | -0.037155556 | 0.974574544 |
| 0.026033333  | -0.037155556 | 0.974574544 |
| -0.030866667 | -0.037188889 | 0.974552027 |
| -0.044       | -0.0372      | 0.974544521 |
| 0.040533333  | -0.037233333 | 0.974522004 |
| -0.0477      | -0.037266667 | 0.974499488 |
| -0.238833333 | -0.0373      | 0.974476973 |
| -0.041433333 | -0.0373      | 0.974476973 |
| 0.156233333  | -0.037311111 | 0.974469468 |
| -0.0716      | -0.037433333 | 0.974386916 |
| -0.101233333 | -0.037455556 | 0.974371908 |
| -0.3371      | -0.037455556 | 0.974371908 |
| -0.013066667 | -0.037466667 | 0.974364404 |
| 0.040933333  | -0.037466667 | 0.974364404 |
| -0.151566667 | -0.037533333 | 0.974319379 |
| -0.087133333 | -0.037588889 | 0.974281861 |
| -0.004766667 | -0.037588889 | 0.974281861 |
| 0.108433333  | -0.037611111 | 0.974266854 |
| 0.065633333  | -0.037622222 | 0.97425935  |
| 0.082566667  | -0.037622222 | 0.97425935  |
| 0.001466667  | -0.037666667 | 0.974229337 |
| -0.025566667 | -0.037722222 | 0.974191822 |
| 0.006466667  | -0.037733333 | 0.974184319 |
| 0.044766667  | -0.037733333 | 0.974184319 |
| -0.000133333 | -0.037744444 | 0.974176817 |
| 0.008066667  | -0.037822222 | 0.974124299 |
| 0.028533333  | -0.037833333 | 0.974116796 |
| 0.0694       | -0.037833333 | 0.974116796 |
| -0.010833333 | -0.037877778 | 0.974086788 |
| -0.674433333 | -0.037944444 | 0.974041776 |
| -0.017166667 | -0.037977778 | 0.974019272 |
| -0.016733333 | -0.038011111 | 0.973996767 |
| -0.0626      | -0.038022222 | 0.973989266 |
| -0.065166667 | -0.038044444 | 0.973974263 |
| -0.042666667 | -0.038055556 | 0.973966762 |
| -0.116066667 | -0.038055556 | 0.973966762 |
| -0.3147      | -0.038144444 | 0.973906755 |

|              |              |             |
|--------------|--------------|-------------|
| 0.139433333  | -0.038155556 | 0.973899254 |
| -0.077133333 | -0.038166667 | 0.973891754 |
| -0.009366667 | -0.038166667 | 0.973891754 |
| 0.0858       | -0.0382      | 0.973869252 |
| -0.096433333 | -0.038222222 | 0.973854252 |
| -0.118866667 | -0.038255556 | 0.973831751 |
| 0.2587       | -0.038288889 | 0.973809251 |
| -0.084866667 | -0.038322222 | 0.973786751 |
| -0.054733333 | -0.038355556 | 0.973764252 |
| -0.054033333 | -0.038355556 | 0.973764252 |
| 0.031666667  | -0.038422222 | 0.973719256 |
| 0.122033333  | -0.038455556 | 0.973696759 |
| -0.047866667 | -0.0385      | 0.973666763 |
| 0.1975       | -0.038544444 | 0.973636768 |
| -0.115566667 | -0.038555556 | 0.973629269 |
| 0.095        | -0.038566667 | 0.973621771 |
| 0.1828       | -0.038622222 | 0.973584279 |
| 0.033366667  | -0.038644444 | 0.973569283 |
| -0.1037      | -0.038788889 | 0.973471813 |
| -0.122433333 | -0.038811111 | 0.973456818 |
| -0.0252      | -0.038822222 | 0.973449321 |
| 0.131466667  | -0.038866667 | 0.973419333 |
| -0.0327      | -0.038988889 | 0.97333687  |
| 0.063633333  | -0.038988889 | 0.97333687  |
| -0.121133333 | -0.039033333 | 0.973306886 |
| 0.204733333  | -0.039033333 | 0.973306886 |
| 0.120866667  | -0.039066667 | 0.973284398 |
| -0.750166667 | -0.0391      | 0.97326191  |
| -0.0152      | -0.039133333 | 0.973239424 |
| 0.049233333  | -0.039222222 | 0.973179461 |
| 0.0167       | -0.0393      | 0.973126997 |
| -0.0887      | -0.039311111 | 0.973119502 |
| -0.095       | -0.039388889 | 0.973067042 |
| -0.187633333 | -0.039466667 | 0.973014584 |
| 0.0701       | -0.039477778 | 0.97300709  |
| 0.049733333  | -0.039488889 | 0.972999596 |
| -0.073433333 | -0.039544444 | 0.972962128 |
| -0.026666667 | -0.039644444 | 0.97289469  |
| 0.0467       | -0.039722222 | 0.972842241 |
| -0.077733333 | -0.039777778 | 0.97280478  |
| -0.0505      | -0.039811111 | 0.972782303 |
| -0.0708      | -0.039822222 | 0.972774811 |
| -0.0793      | -0.039822222 | 0.972774811 |
| 0.089566667  | -0.039844444 | 0.972759828 |
| -0.206766667 | -0.039866667 | 0.972744844 |
| -0.107166667 | -0.0399      | 0.972722369 |
| 0.002366667  | -0.039911111 | 0.972714878 |

|              |              |             |
|--------------|--------------|-------------|
| -0.044466667 | -0.039988889 | 0.972662438 |
| 0.0888       | -0.04        | 0.972654947 |
| -0.0915      | -0.040033333 | 0.972632475 |
| 0.078233333  | -0.040055556 | 0.972617493 |
| -0.0036      | -0.0401      | 0.97258753  |
| -0.164933333 | -0.040144444 | 0.972557569 |
| -0.0235      | -0.0402      | 0.972520118 |
| -0.2152      | -0.040233333 | 0.972497648 |
| -3.33E-05    | -0.040288889 | 0.9724602   |
| -0.1168      | -0.040311111 | 0.972445221 |
| -0.1606      | -0.040322222 | 0.972437732 |
| -0.0204      | -0.0404      | 0.972385308 |
| 0.068833333  | -0.0404      | 0.972385308 |
| -0.092033333 | -0.040411111 | 0.972377819 |
| 0.020233333  | -0.040444444 | 0.972355352 |
| -0.076333333 | -0.040522222 | 0.972302933 |
| 0.1068       | -0.040544444 | 0.972287956 |
| 0.003133333  | -0.040611111 | 0.972243028 |
| 0.0326       | -0.040622222 | 0.97223554  |
| -0.0756      | -0.040633333 | 0.972228052 |
| -0.169366667 | -0.040688889 | 0.972190614 |
| -0.129833333 | -0.040744444 | 0.972153178 |
| -0.039333333 | -0.0408      | 0.972115742 |
| 0.087733333  | -0.0408      | 0.972115742 |
| 0.059166667  | -0.040833333 | 0.972093282 |
| 0.026533333  | -0.040855556 | 0.972078309 |
| -0.112266667 | -0.040866667 | 0.972070822 |
| -0.052166667 | -0.040877778 | 0.972063336 |
| -0.072533333 | -0.0409      | 0.972048363 |
| 0.070766667  | -0.040911111 | 0.972040877 |
| -0.141933333 | -0.040922222 | 0.972033339 |
| 0.050333333  | -0.040944444 | 0.972018418 |
| -0.023333333 | -0.041088889 | 0.971921103 |
| 0.113333333  | -0.041111111 | 0.971906132 |
| -0.0609      | -0.041211111 | 0.971838767 |
| -0.103166667 | -0.041255556 | 0.971808829 |
| -0.010766667 | -0.041255556 | 0.971808829 |
| -0.0165      | -0.041266667 | 0.971801344 |
| 0.1167       | -0.041277778 | 0.97179386  |
| 0.122733333  | -0.041277778 | 0.97179386  |
| 0.130333333  | -0.041288889 | 0.971786376 |
| -0.0316      | -0.0413      | 0.971778891 |
| -0.083833333 | -0.041377778 | 0.971726503 |
| -0.1197      | -0.041388889 | 0.971719019 |
| -0.078233333 | -0.0414      | 0.971711535 |
| -0.063866667 | -0.041411111 | 0.971704051 |
| -0.051133333 | -0.041433333 | 0.971689084 |

|              |              |             |
|--------------|--------------|-------------|
| 0.0956       | -0.041433333 | 0.971689084 |
| -0.022033333 | -0.041444444 | 0.9716816   |
| 0.022466667  | -0.041455556 | 0.971674117 |
| -0.0426      | -0.041455556 | 0.971674117 |
| 0.072266667  | -0.041511111 | 0.9716367   |
| -0.119033333 | -0.041511111 | 0.9716367   |
| 0.121166667  | -0.041544444 | 0.971614251 |
| -0.023233333 | -0.041588889 | 0.971584319 |
| 0.077533333  | -0.041611111 | 0.971569354 |
| 0.056733333  | -0.041666667 | 0.971531941 |
| -0.135333333 | -0.041688889 | 0.971516976 |
| -0.0292      | -0.0417      | 0.971509494 |
| -0.045533333 | -0.041755556 | 0.971472084 |
| 0.007966667  | -0.041788889 | 0.971449638 |
| 0.099666667  | -0.0418      | 0.971442157 |
| 0.017633333  | -0.041822222 | 0.971427193 |
| -0.106833333 | -0.041833333 | 0.971419712 |
| -0.009966667 | -0.041866667 | 0.971397268 |
| 0.098966667  | -0.041922222 | 0.971359862 |
| -0.0028      | -0.042022222 | 0.971292534 |
| 0.408466667  | -0.042066667 | 0.971262613 |
| -0.038266667 | -0.042122222 | 0.971225212 |
| -0.117233333 | -0.042144444 | 0.971210252 |
| -0.1805      | -0.042166667 | 0.971195292 |
| 0.104633333  | -0.042166667 | 0.971195292 |
| -0.143266667 | -0.042211111 | 0.971165373 |
| -0.140766667 | -0.042244444 | 0.971142935 |
| 0.350333333  | -0.042266667 | 0.971127976 |
| 0.072333333  | -0.0423      | 0.971105539 |
| 0.1872       | -0.042322222 | 0.971090581 |
| -0.045033333 | -0.042322222 | 0.971090581 |
| 0.108733333  | -0.0424      | 0.971038229 |
| -0.075166667 | -0.042444444 | 0.971008315 |
| 0.0097       | -0.042477778 | 0.970985881 |
| 0.206166667  | -0.042488889 | 0.970978402 |
| 0.004466667  | -0.042511111 | 0.970963446 |
| 0.1238       | -0.042577778 | 0.970918579 |
| -0.0788      | -0.0426      | 0.970903624 |
| 0.075633333  | -0.042622222 | 0.970888669 |
| 0.1171       | -0.042677778 | 0.970851283 |
| -0.0125      | -0.042688889 | 0.970843806 |
| 0.0149       | -0.042711111 | 0.970828852 |
| 0.0793       | -0.042722222 | 0.970821375 |
| 0.119366667  | -0.042733333 | 0.970813898 |
| -0.2853      | -0.042788889 | 0.970776514 |
| -0.002133333 | -0.0429      | 0.970701751 |
| -0.0033      | -0.0429      | 0.970701751 |



|              |              |             |
|--------------|--------------|-------------|
| 0.071266667  | -0.042922222 | 0.970686799 |
| -0.1054      | -0.042966667 | 0.970656896 |
| -0.361133333 | -0.042977778 | 0.970649421 |
| -0.2194      | -0.043044444 | 0.970604568 |
| -0.1174      | -0.043055556 | 0.970597093 |
| 0.068766667  | -0.043055556 | 0.970597093 |
| 0.018733333  | -0.043077778 | 0.970582143 |
| -0.001466667 | -0.043077778 | 0.970582143 |
| 0.1202       | -0.0431      | 0.970567193 |
| -0.170266667 | -0.043111111 | 0.970559718 |
| -0.218266667 | -0.043111111 | 0.970559718 |
| -0.076133333 | -0.043155556 | 0.970529819 |
| -0.0244      | -0.043177778 | 0.97051487  |
| -0.036966667 | -0.043211111 | 0.970492446 |
| -0.1634      | -0.043211111 | 0.970492446 |
| 0.1646       | -0.043233333 | 0.970477498 |
| -0.038933333 | -0.043244444 | 0.970470023 |
| 0.086866667  | -0.043255556 | 0.970462549 |
| 0.027766667  | -0.043277778 | 0.970447601 |
| 0.025533333  | -0.043277778 | 0.970447601 |
| -0.036866667 | -0.0433      | 0.970432653 |
| -0.141333333 | -0.043366667 | 0.970387811 |
| -0.000266667 | -0.043377778 | 0.970380337 |
| 0.058266667  | -0.043422222 | 0.970350443 |
| -0.017866667 | -0.043433333 | 0.97034297  |
| 0.001        | -0.043511111 | 0.970290659 |
| -0.020333333 | -0.043522222 | 0.970283186 |
| -0.083433333 | -0.043566667 | 0.970253296 |
| 0.012966667  | -0.0436      | 0.970230878 |
| -0.221233333 | -0.043611111 | 0.970223406 |
| -0.0078      | -0.043611111 | 0.970223406 |
| -0.1182      | -0.043622222 | 0.970215934 |
| -0.099       | -0.043622222 | 0.970215934 |
| -0.1086      | -0.043622222 | 0.970215934 |
| -0.011566667 | -0.043677778 | 0.970178573 |
| -0.050666667 | -0.043688889 | 0.970171101 |
| -0.1139      | -0.043755556 | 0.970126271 |
| -0.0385      | -0.043811111 | 0.970088914 |
| 0.065        | -0.043833333 | 0.970073971 |
| 0.0397       | -0.043844444 | 0.9700665   |
| 0.0313       | -0.043866667 | 0.970051558 |
| -0.211766667 | -0.043911111 | 0.970021675 |
| 0.083533333  | -0.043922222 | 0.970014204 |
| -0.0118      | -0.043955556 | 0.969991792 |
| 0.123666667  | -0.043977778 | 0.969976851 |
| -0.020666667 | -0.044044444 | 0.96993203  |
| -0.0289      | -0.0441      | 0.96989468  |

|              |              |             |
|--------------|--------------|-------------|
| -0.189533333 | -0.044144444 | 0.969864801 |
| -0.1249      | -0.044166667 | 0.969849862 |
| 0.0113       | -0.0442      | 0.969827454 |
| 0.3174       | -0.044311111 | 0.969752765 |
| 0.056866667  | -0.044322222 | 0.969745296 |
| -0.113666667 | -0.044444444 | 0.969663145 |
| 0.048866667  | -0.044455556 | 0.969655677 |
| 0.097066667  | -0.044488889 | 0.969633273 |
| -0.147       | -0.044511111 | 0.969618338 |
| 0.075266667  | -0.044533333 | 0.969603403 |
| -0.273266667 | -0.044544444 | 0.969595935 |
| 0.015833333  | -0.044555556 | 0.969588468 |
| -0.113533333 | -0.0446      | 0.969558598 |
| 0.304066667  | -0.044611111 | 0.969551131 |
| 0.002166667  | -0.044622222 | 0.969543664 |
| -0.035066667 | -0.044633333 | 0.969536197 |
| -0.147966667 | -0.044644444 | 0.96952873  |
| -0.001733333 | -0.044644444 | 0.96952873  |
| -0.028133333 | -0.044844444 | 0.969394334 |
| -0.0317      | -0.044866667 | 0.969379402 |
| -0.028533333 | -0.044933333 | 0.969334609 |
| -0.023866667 | -0.045011111 | 0.969282352 |
| -0.0679      | -0.045055556 | 0.969252492 |
| -0.0052      | -0.045066667 | 0.969245027 |
| 0.0402       | -0.045077778 | 0.969237563 |
| -0.0451      | -0.0451      | 0.969222633 |
| 0.0306       | -0.045111111 | 0.969215169 |
| -0.0473      | -0.045177778 | 0.969170382 |
| -0.032133333 | -0.045222222 | 0.969140526 |
| -0.08        | -0.045255556 | 0.969118134 |
| 0.065966667  | -0.045266667 | 0.969110671 |
| 0.0143       | -0.0453      | 0.96908828  |
| 0.034166667  | -0.045311111 | 0.969080816 |
| 0.023566667  | -0.045366667 | 0.969043499 |
| 0.183566667  | -0.045388889 | 0.969028573 |
| -0.210333333 | -0.045444444 | 0.968991258 |
| -0.017933333 | -0.045588889 | 0.968894246 |
| 0.071        | -0.045688889 | 0.96882709  |
| -0.256933333 | -0.0457      | 0.968819629 |
| -0.054633333 | -0.045722222 | 0.968804706 |
| 0.017066667  | -0.045733333 | 0.968797244 |
| -0.395966667 | -0.045788889 | 0.968759939 |
| -0.038333333 | -0.0458      | 0.968752478 |
| -0.1837      | -0.045822222 | 0.968737556 |
| -0.025566667 | -0.045944444 | 0.96865549  |
| 0.208433333  | -0.046       | 0.968618189 |
| 0.035        | -0.046011111 | 0.968610729 |

|              |              |             |
|--------------|--------------|-------------|
| 0.254433333  | -0.046077778 | 0.968565971 |
| 0.1137       | -0.0461      | 0.968551052 |
| 0.0124       | -0.046133333 | 0.968528674 |
| -0.0719      | -0.046222222 | 0.968469002 |
| -0.019866667 | -0.046244444 | 0.968454084 |
| 0.011066667  | -0.046322222 | 0.968401875 |
| -0.037933333 | -0.046355556 | 0.9683795   |
| -0.0126      | -0.0464      | 0.968349668 |
| -0.0514      | -0.046466667 | 0.968304922 |
| -0.0376      | -0.0465      | 0.96828255  |
| -0.021833333 | -0.046511111 | 0.968275093 |
| 0.121633333  | -0.046533333 | 0.968260178 |
| 0.1441       | -0.046566667 | 0.968237807 |
| 0.104        | -0.046611111 | 0.968207979 |
| -0.146433333 | -0.046644444 | 0.968185609 |
| -0.090366667 | -0.046722222 | 0.968133414 |
| 0.0294       | -0.046733333 | 0.968125958 |
| 0.077066667  | -0.046755556 | 0.968111046 |
| -0.021633333 | -0.046766667 | 0.96810359  |
| -0.1005      | -0.046788889 | 0.968088678 |
| -0.195933333 | -0.046844444 | 0.968051399 |
| -0.287366667 | -0.046844444 | 0.968051399 |
| -0.140266667 | -0.046844444 | 0.968051399 |
| 0.089866667  | -0.046877778 | 0.968029033 |
| 0.001533333  | -0.046888889 | 0.968021578 |
| 0.073266667  | -0.046888889 | 0.968021578 |
| 0.2401       | -0.046922222 | 0.967999212 |
| 0.0875       | -0.047055556 | 0.967909754 |
| 0.025        | -0.047066667 | 0.967902299 |
| 0.196466667  | -0.047111111 | 0.967872482 |
| -0.258266667 | -0.047188889 | 0.967820304 |
| -0.012333333 | -0.047188889 | 0.967820304 |
| 0.0301       | -0.047222222 | 0.967797943 |
| -0.005433333 | -0.047222222 | 0.967797943 |
| -0.132733333 | -0.047244444 | 0.967783036 |
| 0.105566667  | -0.047422222 | 0.967663787 |
| -0.0719      | -0.047444444 | 0.967648882 |
| -0.097133333 | -0.0475      | 0.96761162  |
| -0.007633333 | -0.047511111 | 0.967604168 |
| 0.003433333  | -0.047533333 | 0.967589264 |
| -0.005133333 | -0.047588889 | 0.967552004 |
| -0.086166667 | -0.0476      | 0.967544553 |
| 0.023366667  | -0.047611111 | 0.967537101 |
| 0.005766667  | -0.047611111 | 0.967537101 |
| -0.0296      | -0.047622222 | 0.96752965  |
| -0.015433333 | -0.0477      | 0.96747749  |
| -0.072533333 | -0.047711111 | 0.967470039 |

|              |              |             |
|--------------|--------------|-------------|
| 0.0505       | -0.047711111 | 0.967470039 |
| 0.156533333  | -0.047722222 | 0.967462588 |
| 0.067066667  | -0.047733333 | 0.967455137 |
| 0.0414       | -0.047777778 | 0.967425333 |
| 0.0058       | -0.047822222 | 0.967395531 |
| -0.068966667 | -0.047833333 | 0.96738808  |
| -0.1065      | -0.047933333 | 0.967321028 |
| 0.0698       | -0.048033333 | 0.967253981 |
| 0.0182       | -0.048066667 | 0.967231633 |
| -0.2556      | -0.048077778 | 0.967224184 |
| -0.1848      | -0.048077778 | 0.967224184 |
| -0.109866667 | -0.048088889 | 0.967216735 |
| 0.0613       | -0.048144444 | 0.96717949  |
| -0.0769      | -0.048144444 | 0.96717949  |
| -0.162933333 | -0.048155556 | 0.967172041 |
| -0.2539      | -0.048188889 | 0.967149695 |
| -0.1544      | -0.048211111 | 0.967134797 |
| -0.0395      | -0.048222222 | 0.967127349 |
| -0.081066667 | -0.048255556 | 0.967105004 |
| -0.139366667 | -0.048288889 | 0.967082659 |
| -0.068133333 | -0.048366667 | 0.967030524 |
| 0.001266667  | -0.048411111 | 0.967000733 |
| -0.001166667 | -0.048422222 | 0.966993286 |
| -0.268333333 | -0.048422222 | 0.966993286 |
| -0.156033333 | -0.048433333 | 0.966985838 |
| -0.077366667 | -0.048444444 | 0.966978391 |
| 0.0121       | -0.048477778 | 0.966956049 |
| -0.170666667 | -0.048566667 | 0.966896474 |
| -0.157133333 | -0.048588889 | 0.966881581 |
| 0.260133333  | -0.0486      | 0.966874134 |
| 0.1254       | -0.048611111 | 0.966866688 |
| 0.056533333  | -0.048633333 | 0.966851795 |
| -0.093033333 | -0.048688889 | 0.966814564 |
| 0.106266667  | -0.048722222 | 0.966792226 |
| -0.1419      | -0.048733333 | 0.96678478  |
| -0.018433333 | -0.048733333 | 0.96678478  |
| -0.0242      | -0.048744444 | 0.966777335 |
| 0.022066667  | -0.048755556 | 0.966769889 |
| -0.155566667 | -0.048755556 | 0.966769889 |
| -0.1183      | -0.048822222 | 0.966725216 |
| 0.031766667  | -0.048844444 | 0.966710325 |
| -0.039066667 | -0.048855556 | 0.96670288  |
| -0.020366667 | -0.0491      | 0.966539099 |
| 0.057666667  | -0.049177778 | 0.966486993 |
| -0.009133333 | -0.049188889 | 0.96647955  |
| 0.042033333  | -0.049255556 | 0.96643489  |
| -0.079533333 | -0.049266667 | 0.966427447 |

|              |              |             |
|--------------|--------------|-------------|
| 0.0503       | -0.049288889 | 0.966412561 |
| -0.027366667 | -0.049311111 | 0.966397675 |
| -0.0752      | -0.049311111 | 0.966397675 |
| -0.0198      | -0.049344444 | 0.966375347 |
| 0.022766667  | -0.049366667 | 0.966360462 |
| -0.753933333 | -0.049388889 | 0.966345577 |
| -0.099933333 | -0.049433333 | 0.966315807 |
| -0.023466667 | -0.049477778 | 0.966286039 |
| -0.1534      | -0.0495      | 0.966271155 |
| 0.090266667  | -0.049533333 | 0.96624883  |
| 0.117433333  | -0.049533333 | 0.96624883  |
| -0.056166667 | -0.049555556 | 0.966233946 |
| -0.078666667 | -0.049566667 | 0.966226505 |
| 0.098233333  | -0.049566667 | 0.966226505 |
| 0.082566667  | -0.049577778 | 0.966219063 |
| -0.039533333 | -0.0496      | 0.96620418  |
| -0.564966667 | -0.049655556 | 0.966166974 |
| -0.2375      | -0.049666667 | 0.966159533 |
| -0.5321      | -0.049711111 | 0.96612977  |
| 0.027233333  | -0.049711111 | 0.96612977  |
| 0.062366667  | -0.049722222 | 0.966122329 |
| -0.087       | -0.049766667 | 0.966092567 |
| -0.105633333 | -0.0498      | 0.966070245 |
| -0.0136      | -0.0498      | 0.966070245 |
| 0.240766667  | -0.049833333 | 0.966047925 |
| -0.0324      | -0.049866667 | 0.966025605 |
| -0.083733333 | -0.049888889 | 0.966010725 |
| -0.068966667 | -0.049977778 | 0.965951208 |
| 0.010566667  | -0.049988889 | 0.965943768 |
| 0.035466667  | -0.049988889 | 0.965943768 |
| 0.060433333  | -0.05        | 0.965936329 |
| 0.3122       | -0.050011111 | 0.96592889  |
| -0.2591      | -0.050022222 | 0.96592145  |
| -0.190066667 | -0.050044444 | 0.965906572 |
| 0.0535       | -0.050055556 | 0.965899133 |
| 0.011266667  | -0.050055556 | 0.965899133 |
| 0.050466667  | -0.0502      | 0.965802431 |
| -0.0132      | -0.050344444 | 0.965705738 |
| -0.064066667 | -0.050366667 | 0.965690864 |
| 0.007466667  | -0.050422222 | 0.965653677 |
| -0.074333333 | -0.050433333 | 0.96564624  |
| 0.134866667  | -0.050433333 | 0.96564624  |
| 0.0918       | -0.050455556 | 0.965631366 |
| 0.123466667  | -0.050477778 | 0.965616492 |
| -0.1175      | -0.050511111 | 0.965594182 |
| -0.065633333 | -0.050544444 | 0.965571873 |
| -0.073733333 | -0.050577778 | 0.965549563 |

|              |              |             |
|--------------|--------------|-------------|
| 0.011266667  | -0.050577778 | 0.965549563 |
| 0.179033333  | -0.050588889 | 0.965542127 |
| -0.166666667 | -0.0506      | 0.965534691 |
| -0.005466667 | -0.050633333 | 0.965512382 |
| 0.1405       | -0.050655556 | 0.965497511 |
| 0.073433333  | -0.050788889 | 0.965408284 |
| -0.3898      | -0.050955556 | 0.965296762 |
| -0.077533333 | -0.051055556 | 0.965229855 |
| -0.0799      | -0.051111111 | 0.965192686 |
| 0.0071       | -0.051133333 | 0.965177819 |
| -0.267566667 | -0.051222222 | 0.965118354 |
| -0.216066667 | -0.051266667 | 0.965088622 |
| 0.110233333  | -0.0513      | 0.965066324 |
| -0.0556      | -0.051333333 | 0.965044027 |
| -0.146233333 | -0.051366667 | 0.96502173  |
| 0.034333333  | -0.0514      | 0.964999433 |
| -0.099633333 | -0.051511111 | 0.964925115 |
| 0.029        | -0.051533333 | 0.964910252 |
| 0.125766667  | -0.051566667 | 0.964887958 |
| -0.017733333 | -0.0516      | 0.964865665 |
| 0.0048       | -0.0516      | 0.964865665 |
| 0.05         | -0.051622222 | 0.964850803 |
| -0.220833333 | -0.051677778 | 0.964813649 |
| -0.0233      | -0.051677778 | 0.964813649 |
| -0.022366667 | -0.051688889 | 0.964806219 |
| -0.003533333 | -0.051688889 | 0.964806219 |
| 0.2572       | -0.051733333 | 0.964776497 |
| -0.0618      | -0.051755556 | 0.964761636 |
| -0.086066667 | -0.051766667 | 0.964754206 |
| -0.000966667 | -0.051855556 | 0.964694766 |
| 0.018966667  | -0.0519      | 0.964665048 |
| 0.061366667  | -0.0519      | 0.964665048 |
| 0.033466667  | -0.051911111 | 0.964657618 |
| -0.129066667 | -0.051911111 | 0.964657618 |
| -0.098833333 | -0.051966667 | 0.964620472 |
| 0.064266667  | -0.051977778 | 0.964613043 |
| 0.015866667  | -0.051988889 | 0.964605614 |
| -0.109666667 | -0.052055556 | 0.96456104  |
| -0.007233333 | -0.052088889 | 0.964538755 |
| -0.0225      | -0.052122222 | 0.964516469 |
| -0.0942      | -0.052133333 | 0.964509041 |
| -0.088433333 | -0.052177778 | 0.964479328 |
| 0.128333333  | -0.052222222 | 0.964449616 |
| -0.208533333 | -0.052233333 | 0.964442189 |
| -0.041466667 | -0.052266667 | 0.964419905 |
| -0.076566667 | -0.0523      | 0.964397623 |
| 0.100166667  | -0.0523      | 0.964397623 |

|              |              |             |
|--------------|--------------|-------------|
| 0.0011       | -0.052322222 | 0.964382768 |
| 0.0051       | -0.0524      | 0.964330778 |
| -0.0407      | -0.0524      | 0.964330778 |
| -0.185666667 | -0.052433333 | 0.964308498 |
| -0.002166667 | -0.052444444 | 0.964301071 |
| -0.030966667 | -0.052488889 | 0.964271365 |
| -0.161666667 | -0.0525      | 0.964263938 |
| 0.029366667  | -0.052544444 | 0.964234233 |
| 0.017633333  | -0.052688889 | 0.964137698 |
| 0.032166667  | -0.052788889 | 0.964070871 |
| -0.181933333 | -0.052822222 | 0.964048596 |
| -0.176833333 | -0.052944444 | 0.963966928 |
| -0.0434      | -0.052955556 | 0.963959504 |
| -0.0584      | -0.052966667 | 0.96395208  |
| -0.0449      | -0.053033333 | 0.963907536 |
| 0.135466667  | -0.053188889 | 0.963803611 |
| 0.098966667  | -0.053222222 | 0.963781342 |
| 0.038633333  | -0.053333333 | 0.963707118 |
| 0.087166667  | -0.053488889 | 0.963603214 |
| -0.073933333 | -0.053566667 | 0.963551266 |
| 0.2108       | -0.053566667 | 0.963551266 |
| -0.0505      | -0.053588889 | 0.963536425 |
| -0.3152      | -0.053722222 | 0.963447379 |
| -0.261933333 | -0.053755556 | 0.963425119 |
| 0.0779       | -0.0538      | 0.96339544  |
| -0.058933333 | -0.053811111 | 0.96338802  |
| 0.115233333  | -0.053855556 | 0.963358342 |
| 0.072733333  | -0.053866667 | 0.963350922 |
| 0.0257       | -0.053911111 | 0.963321245 |
| 0.1512       | -0.053966667 | 0.96328415  |
| -0.133333333 | -0.053988889 | 0.963269313 |
| -0.285533333 | -0.054077778 | 0.963209965 |
| -0.030033333 | -0.054088889 | 0.963202546 |
| -0.041333333 | -0.0541      | 0.963195128 |
| -0.0473      | -0.054144444 | 0.963165456 |
| -0.016566667 | -0.054222222 | 0.963113532 |
| 0.0121       | -0.054277778 | 0.963076445 |
| -0.015733333 | -0.054277778 | 0.963076445 |
| 0.017233333  | -0.054333333 | 0.963039359 |
| -0.1607      | -0.054411111 | 0.962987442 |
| 0.0261       | -0.054422222 | 0.962980025 |
| -0.137333333 | -0.054444444 | 0.962965192 |
| -0.034333333 | -0.054444444 | 0.962965192 |
| -0.087733333 | -0.054566667 | 0.962883615 |
| -0.0822      | -0.054577778 | 0.962876199 |
| -0.048833333 | -0.054588889 | 0.962868784 |
| -0.333933333 | -0.054633333 | 0.962839121 |

|              |              |             |
|--------------|--------------|-------------|
| -0.000866667 | -0.054666667 | 0.962816875 |
| 0.137433333  | -0.054744444 | 0.96276497  |
| 0.070833333  | -0.054788889 | 0.962735311 |
| 0.112166667  | -0.054855556 | 0.962690824 |
| 0.099033333  | -0.054911111 | 0.962653753 |
| -0.055766667 | -0.054933333 | 0.962638925 |
| -0.014633333 | -0.055022222 | 0.962579616 |
| 0.088633333  | -0.055044444 | 0.962564789 |
| -0.260466667 | -0.055066667 | 0.962549963 |
| 0.095366667  | -0.055066667 | 0.962549963 |
| -0.100366667 | -0.055077778 | 0.96254255  |
| 0.0374       | -0.055188889 | 0.962468421 |
| -0.276533333 | -0.055211111 | 0.962453596 |
| -0.510433333 | -0.055211111 | 0.962453596 |
| 0.1719       | -0.055233333 | 0.962438771 |
| -0.251466667 | -0.055255556 | 0.962423947 |
| 0.035833333  | -0.055266667 | 0.962416534 |
| -0.125866667 | -0.055288889 | 0.96240171  |
| 0.091033333  | -0.055344444 | 0.96236465  |
| -0.051033333 | -0.055377778 | 0.962342415 |
| 0.0333       | -0.0554      | 0.962327592 |
| -0.209566667 | -0.055411111 | 0.962320181 |
| 0.007033333  | -0.055433333 | 0.962305358 |
| 0.0435       | -0.055433333 | 0.962305358 |
| -0.0021      | -0.055455556 | 0.962290535 |
| 0.030033333  | -0.055466667 | 0.962283124 |
| -0.072466667 | -0.055555556 | 0.962223837 |
| -0.219066667 | -0.0556      | 0.962194195 |
| -0.216533333 | -0.055644444 | 0.962164553 |
| -0.036833333 | -0.055666667 | 0.962149733 |
| -0.025833333 | -0.055688889 | 0.962134913 |
| -0.102933333 | -0.055722222 | 0.962112683 |
| -0.243033333 | -0.055722222 | 0.962112683 |
| -0.122333333 | -0.055744444 | 0.962097863 |
| 0.049633333  | -0.055755556 | 0.962090454 |
| -0.059       | -0.055766667 | 0.962083044 |
| 0.1069       | -0.0558      | 0.962060815 |
| -0.074433333 | -0.055833333 | 0.962038587 |
| 0.1923       | -0.055844444 | 0.962031178 |
| 0.031866667  | -0.055855556 | 0.962023769 |
| 0.138        | -0.055866667 | 0.96201636  |
| -0.193833333 | -0.055888889 | 0.962001542 |
| 0.0515       | -0.055911111 | 0.961986724 |
| -0.125766667 | -0.055911111 | 0.961986724 |
| 0.074366667  | -0.055922222 | 0.961979315 |
| -0.124066667 | -0.055944444 | 0.961964497 |
| 0.069666667  | -0.055955556 | 0.961957089 |



|              |              |             |
|--------------|--------------|-------------|
| 0.080033333  | -0.056033333 | 0.96190523  |
| -0.137966667 | -0.056088889 | 0.961868189 |
| -0.071733333 | -0.056144444 | 0.96183115  |
| -0.387966667 | -0.056144444 | 0.96183115  |
| -0.304166667 | -0.056144444 | 0.96183115  |
| -0.106133333 | -0.0562      | 0.961794112 |
| 0.106533333  | -0.056211111 | 0.961786705 |
| -0.007033333 | -0.056244444 | 0.961764483 |
| -0.106766667 | -0.056244444 | 0.961764483 |
| -0.0945      | -0.056255556 | 0.961757076 |
| 0.097533333  | -0.056266667 | 0.961749669 |
| 0.161366667  | -0.056277778 | 0.961742262 |
| 0.022366667  | -0.0563      | 0.961727448 |
| -0.0132      | -0.056311111 | 0.961720041 |
| 0.102266667  | -0.056344444 | 0.961697821 |
| 0.010333333  | -0.056344444 | 0.961697821 |
| -0.137733333 | -0.056377778 | 0.961675602 |
| -0.125033333 | -0.056388889 | 0.961668195 |
| 0.070933333  | -0.056511111 | 0.961586728 |
| 0.094        | -0.056533333 | 0.961571916 |
| -0.228266667 | -0.0566      | 0.961527483 |
| 0.018533333  | -0.056622222 | 0.961512673 |
| 0.035166667  | -0.056633333 | 0.961505268 |
| -0.0261      | -0.056633333 | 0.961505268 |
| 0.0462       | -0.056633333 | 0.961505268 |
| 0.0656       | -0.056655556 | 0.961490458 |
| 0.089366667  | -0.056655556 | 0.961490458 |
| 0.378933333  | -0.056744444 | 0.961431219 |
| -0.1962      | -0.056755556 | 0.961423814 |
| 0.027566667  | -0.0568      | 0.961394197 |
| -0.020633333 | -0.056822222 | 0.961379388 |
| -0.1908      | -0.056844444 | 0.96136458  |
| 0.0086       | -0.056855556 | 0.961357176 |
| 0.0749       | -0.056866667 | 0.961349772 |
| 0.048366667  | -0.056888889 | 0.961334964 |
| -0.044466667 | -0.0569      | 0.96132756  |
| -0.0311      | -0.056911111 | 0.961320156 |
| -0.0254      | -0.056922222 | 0.961312753 |
| -0.009566667 | -0.056933333 | 0.961305349 |
| 0.010633333  | -0.056955556 | 0.961290542 |
| -0.0317      | -0.056977778 | 0.961275735 |
| -0.288       | -0.057       | 0.961260928 |
| -0.185066667 | -0.057       | 0.961260928 |
| 0.0977       | -0.057033333 | 0.961238719 |
| -0.186733333 | -0.057066667 | 0.96121651  |
| -0.0727      | -0.057077778 | 0.961209107 |
| -0.0342      | -0.0571      | 0.961194301 |

|              |              |             |
|--------------|--------------|-------------|
| -0.0591      | -0.0571      | 0.961194301 |
| 0.2539       | -0.057111111 | 0.961186898 |
| -0.0142      | -0.057133333 | 0.961172093 |
| 0.077966667  | -0.057133333 | 0.961172093 |
| 0.017333333  | -0.057133333 | 0.961172093 |
| -0.013266667 | -0.057144444 | 0.961164691 |
| -0.0074      | -0.057166667 | 0.961149886 |
| -0.062833333 | -0.057211111 | 0.961120276 |
| -0.014766667 | -0.057222222 | 0.961112874 |
| -0.131166667 | -0.057244444 | 0.96109807  |
| -0.0964      | -0.057288889 | 0.961068462 |
| 0.1116       | -0.057288889 | 0.961068462 |
| -0.227033333 | -0.057333333 | 0.961038856 |
| -0.074633333 | -0.057388889 | 0.961001848 |
| 0.007166667  | -0.057511111 | 0.960920438 |
| 0.0269       | -0.057522222 | 0.960913037 |
| 0.0065       | -0.057522222 | 0.960913037 |
| -0.004666667 | -0.057533333 | 0.960905637 |
| -0.1244      | -0.057633333 | 0.960839034 |
| 0.099466667  | -0.057677778 | 0.960809434 |
| -0.021533333 | -0.0577      | 0.960794635 |
| 0.278666667  | -0.0577      | 0.960794635 |
| -0.040466667 | -0.057777778 | 0.960742838 |
| 0.0414       | -0.0578      | 0.96072804  |
| 0.261733333  | -0.057811111 | 0.960720641 |
| -0.1524      | -0.0579      | 0.96066145  |
| -0.006233333 | -0.057933333 | 0.960639254 |
| 0.073933333  | -0.057944444 | 0.960631855 |
| -0.112266667 | -0.057977778 | 0.96060966  |
| 0.153333333  | -0.057988889 | 0.960602262 |
| 0.241933333  | -0.058066667 | 0.960550476 |
| 0.179466667  | -0.058077778 | 0.960543078 |
| -0.053666667 | -0.058088889 | 0.960535681 |
| 0.235266667  | -0.0581      | 0.960528283 |
| -0.136266667 | -0.058211111 | 0.960454309 |
| -0.225133333 | -0.058311111 | 0.960387738 |
| 0.0805       | -0.058311111 | 0.960387738 |
| 0.273        | -0.058355556 | 0.960358152 |
| -0.044166667 | -0.058377778 | 0.96034336  |
| 0.0588       | -0.058466667 | 0.960284192 |
| 0.057466667  | -0.058477778 | 0.960276796 |
| -0.4747      | -0.0585      | 0.960262005 |
| -0.083066667 | -0.0585      | 0.960262005 |
| 0.0273       | -0.058522222 | 0.960247214 |
| -0.231033333 | -0.058577778 | 0.960210237 |
| -0.040733333 | -0.058588889 | 0.960202842 |
| 0.039266667  | -0.0586      | 0.960195447 |

|              |              |             |
|--------------|--------------|-------------|
| 0.062866667  | -0.058666667 | 0.960151077 |
| 0.152166667  | -0.058744444 | 0.960099316 |
| 0.049966667  | -0.058744444 | 0.960099316 |
| -0.173766667 | -0.058822222 | 0.960047557 |
| 0.1541       | -0.058822222 | 0.960047557 |
| -0.1153      | -0.058922222 | 0.959981014 |
| -0.130866667 | -0.058922222 | 0.959981014 |
| -0.048133333 | -0.058955556 | 0.959958834 |
| -0.064       | -0.058977778 | 0.959944047 |
| -0.309133333 | -0.059088889 | 0.959870119 |
| -0.1612      | -0.0591      | 0.959862726 |
| -0.1425      | -0.059133333 | 0.959840549 |
| 0.087966667  | -0.059188889 | 0.959803588 |
| -0.064666667 | -0.059266667 | 0.959751845 |
| -0.005166667 | -0.059277778 | 0.959744453 |
| 0.0926       | -0.059288889 | 0.959737062 |
| -0.0971      | -0.0593      | 0.95972967  |
| -0.080233333 | -0.0593      | 0.95972967  |
| -0.014666667 | -0.0593      | 0.95972967  |
| -0.1624      | -0.059322222 | 0.959714887 |
| 0.101733333  | -0.059355556 | 0.959692713 |
| -0.023133333 | -0.059388889 | 0.95967054  |
| -0.059866667 | -0.059411111 | 0.959655758 |
| -0.0317      | -0.059466667 | 0.959618804 |
| 0.313966667  | -0.059477778 | 0.959611414 |
| -0.075633333 | -0.059511111 | 0.959589242 |
| -0.3488      | -0.059555556 | 0.959559681 |
| -0.084566667 | -0.059555556 | 0.959559681 |
| 0.023233333  | -0.059566667 | 0.959552291 |
| 0.033        | -0.059655556 | 0.959493172 |
| 0.0058       | -0.059655556 | 0.959493172 |
| -0.034333333 | -0.059755556 | 0.959426667 |
| 0.086066667  | -0.0598      | 0.959397111 |
| -0.062966667 | -0.059811111 | 0.959389722 |
| -0.210366667 | -0.059822222 | 0.959382333 |
| 0.1742       | -0.059833333 | 0.959374944 |
| 0.134966667  | -0.059866667 | 0.959352778 |
| -0.163766667 | -0.059866667 | 0.959352778 |
| -0.0682      | -0.059877778 | 0.95934539  |
| 0.037066667  | -0.059888889 | 0.959338001 |
| 0.036733333  | -0.059933333 | 0.959308448 |
| -0.0156      | -0.059944444 | 0.95930106  |
| -0.056       | -0.059966667 | 0.959286283 |
| -0.0344      | -0.060011111 | 0.959256731 |
| 0.1378       | -0.060033333 | 0.959241956 |
| 0.1038       | -0.060055556 | 0.959227181 |
| 0.034166667  | -0.060055556 | 0.959227181 |

|              |              |             |
|--------------|--------------|-------------|
| -0.012633333 | -0.060077778 | 0.959212405 |
| 0.017366667  | -0.060133333 | 0.959175469 |
| -0.0968      | -0.060211111 | 0.959123759 |
| -0.075566667 | -0.060222222 | 0.959116373 |
| 0.354233333  | -0.060255556 | 0.959094213 |
| 0.0713       | -0.060266667 | 0.959086826 |
| -0.006366667 | -0.0603      | 0.959064667 |
| -0.212233333 | -0.060344444 | 0.959035122 |
| 0.111966667  | -0.060344444 | 0.959035122 |
| 0.028433333  | -0.060355556 | 0.959027736 |
| 0.033466667  | -0.060377778 | 0.959012964 |
| -0.123133333 | -0.060388889 | 0.959005578 |
| -0.164466667 | -0.060411111 | 0.958990806 |
| -0.056166667 | -0.060433333 | 0.958976034 |
| -0.098266667 | -0.0605      | 0.958931721 |
| -0.102733333 | -0.060522222 | 0.958916951 |
| -0.009933333 | -0.060622222 | 0.958850486 |
| -0.176033333 | -0.060644444 | 0.958835717 |
| 0.000133333  | -0.060688889 | 0.958806179 |
| 0.052866667  | -0.0607      | 0.958798794 |
| -0.185666667 | -0.060722222 | 0.958784026 |
| 0.0129       | -0.060855556 | 0.958695419 |
| 0.093233333  | -0.060866667 | 0.958688036 |
| -0.0353      | -0.060922222 | 0.958651119 |
| -0.143133333 | -0.060966667 | 0.958621587 |
| -0.0231      | -0.060966667 | 0.958621587 |
| -0.059633333 | -0.061066667 | 0.958555143 |
| -0.158266667 | -0.061066667 | 0.958555143 |
| -0.025866667 | -0.061077778 | 0.95854776  |
| -0.108833333 | -0.061133333 | 0.958510849 |
| -0.0626      | -0.061166667 | 0.958488703 |
| 0.0057       | -0.061177778 | 0.958481321 |
| -0.032066667 | -0.0612      | 0.958466558 |
| -0.032966667 | -0.061255556 | 0.95842965  |
| -0.1101      | -0.061288889 | 0.958407505 |
| -0.108066667 | -0.061366667 | 0.958355838 |
| 0.030233333  | -0.061411111 | 0.958326314 |
| 0.023066667  | -0.061466667 | 0.958289412 |
| -0.214733333 | -0.061477778 | 0.958282031 |
| -0.106966667 | -0.0615      | 0.958267271 |
| -0.231566667 | -0.0615      | 0.958267271 |
| 0.156        | -0.061566667 | 0.95822299  |
| 0.028466667  | -0.061622222 | 0.958186092 |
| 0.119966667  | -0.061655556 | 0.958163953 |
| 0.1          | -0.061688889 | 0.958141815 |
| -0.0084      | -0.061722222 | 0.958119678 |
| -0.047566667 | -0.061777778 | 0.958082783 |

|              |              |             |
|--------------|--------------|-------------|
| -0.027866667 | -0.061788889 | 0.958075404 |
| 0.014933333  | -0.0618      | 0.958068025 |
| 0.120333333  | -0.061811111 | 0.958060647 |
| -0.0671      | -0.061844444 | 0.958038511 |
| -0.0669      | -0.061855556 | 0.958031133 |
| 0.055533333  | -0.061855556 | 0.958031133 |
| -0.107133333 | -0.061888889 | 0.958008998 |
| 0.024733333  | -0.061911111 | 0.957994241 |
| -0.036233333 | -0.062011111 | 0.957927841 |
| -0.2152      | -0.062044444 | 0.957905708 |
| -0.0938      | -0.062044444 | 0.957905708 |
| -0.138466667 | -0.062055556 | 0.957898331 |
| 0.133266667  | -0.062066667 | 0.957890953 |
| -0.0781      | -0.062066667 | 0.957890953 |
| -0.056566667 | -0.062133333 | 0.957846669 |
| 0.003966667  | -0.062144444 | 0.957839313 |
| -0.1626      | -0.062155556 | 0.957831936 |
| -0.123666667 | -0.062155556 | 0.957831936 |
| -0.109866667 | -0.062177778 | 0.957817183 |
| -0.0013      | -0.062211111 | 0.957795053 |
| -0.1705      | -0.062266667 | 0.957758171 |
| 0.2728       | -0.062333333 | 0.957713914 |
| -0.131833333 | -0.062355556 | 0.957699162 |
| 0.112733333  | -0.062355556 | 0.957699162 |
| -0.008733333 | -0.062411111 | 0.957662283 |
| -0.3156      | -0.062444444 | 0.957640157 |
| -0.018966667 | -0.062466667 | 0.957625406 |
| 0.2414       | -0.062488889 | 0.957610656 |
| -0.083266667 | -0.062522222 | 0.957588531 |
| -0.032566667 | -0.062655556 | 0.957500035 |
| -0.014366667 | -0.0627      | 0.957470538 |
| -0.090066667 | -0.062755556 | 0.957433668 |
| 0.134466667  | -0.062766667 | 0.957426294 |
| 0.0285       | -0.0628      | 0.957404173 |
| 0.0247       | -0.0628      | 0.957404173 |
| -0.135266667 | -0.0628      | 0.957404173 |
| 0.123833333  | -0.062811111 | 0.9573968   |
| -0.0747      | -0.062866667 | 0.957359933 |
| -0.016966667 | -0.062888889 | 0.957345187 |
| 0.075966667  | -0.062977778 | 0.957286203 |
| -0.063       | -0.062988889 | 0.957278831 |
| 0.0877       | -0.063033333 | 0.957249341 |
| -0.2371      | -0.063066667 | 0.957227224 |
| -0.014366667 | -0.063077778 | 0.957219852 |
| 0.0052       | -0.063122222 | 0.957190364 |
| -0.154133333 | -0.063122222 | 0.957190364 |
| -0.015833333 | -0.063177778 | 0.957153505 |

|              |              |             |
|--------------|--------------|-------------|
| 0.0803       | -0.0632      | 0.957138761 |
| -0.074966667 | -0.063222222 | 0.957124018 |
| 0.017333333  | -0.063244444 | 0.957109276 |
| 0.026066667  | -0.063277778 | 0.957087162 |
| -0.047433333 | -0.063355556 | 0.957035565 |
| 0.199766667  | -0.063533333 | 0.956917641 |
| -0.021666667 | -0.063577778 | 0.956888162 |
| -0.003466667 | -0.063655556 | 0.956836576 |
| -0.0037      | -0.063722222 | 0.956792362 |
| -0.0412      | -0.063733333 | 0.956784993 |
| -0.0258      | -0.063755556 | 0.956770256 |
| -0.181       | -0.063822222 | 0.956726045 |
| -0.106266667 | -0.063877778 | 0.956689203 |
| 0.006633333  | -0.063888889 | 0.956681835 |
| -0.099833333 | -0.063944444 | 0.956644996 |
| -0.015566667 | -0.063955556 | 0.956637628 |
| 0.095333333  | -0.064       | 0.956608158 |
| -0.145866667 | -0.064022222 | 0.956593423 |
| 0.031066667  | -0.064044444 | 0.956578689 |
| -0.1765      | -0.064155556 | 0.956505019 |
| 0.0197       | -0.064155556 | 0.956505019 |
| -0.221533333 | -0.064166667 | 0.956497653 |
| 0.0367       | -0.064211111 | 0.956468187 |
| -0.0256      | -0.064322222 | 0.956394526 |
| -0.064533333 | -0.064355556 | 0.956372429 |
| 0.015233333  | -0.064377778 | 0.956357698 |
| -0.019033333 | -0.064388889 | 0.956350332 |
| -0.1007      | -0.064411111 | 0.956335601 |
| -0.059866667 | -0.064477778 | 0.95629141  |
| 0.018433333  | -0.064477778 | 0.95629141  |
| -0.057266667 | -0.064522222 | 0.956261951 |
| -0.0664      | -0.064544444 | 0.956247221 |
| -0.053133333 | -0.064577778 | 0.956225128 |
| 0.003833333  | -0.0647      | 0.956144122 |
| 0.068633333  | -0.064711111 | 0.956136758 |
| -0.031066667 | -0.064711111 | 0.956136758 |
| 0.132366667  | -0.064755556 | 0.956107303 |
| -0.130233333 | -0.064766667 | 0.956099939 |
| -0.0121      | -0.064833333 | 0.956055759 |
| 0.085133333  | -0.064844444 | 0.956048396 |
| -0.1893      | -0.064888889 | 0.956018944 |
| 0.032733333  | -0.064955556 | 0.955974767 |
| 0.0046       | -0.064977778 | 0.955960042 |
| -0.0197      | -0.065066667 | 0.955901145 |
| -0.030533333 | -0.065122222 | 0.955864335 |
| 0.034033333  | -0.065122222 | 0.955864335 |
| 0.085733333  | -0.065133333 | 0.955856974 |

|              |              |             |
|--------------|--------------|-------------|
| -0.0841      | -0.065133333 | 0.955856974 |
| 0.142833333  | -0.065133333 | 0.955856974 |
| -0.3563      | -0.065166667 | 0.955834889 |
| -0.072033333 | -0.065211111 | 0.955805443 |
| -0.083366667 | -0.065244444 | 0.955783336 |
| 0.075166667  | -0.065266667 | 0.955768638 |
| -0.081133333 | -0.065277778 | 0.955761277 |
| 0.069033333  | -0.065288889 | 0.955753916 |
| -0.084166667 | -0.0653      | 0.955746555 |
| -0.0051      | -0.065344444 | 0.955717112 |
| -0.144566667 | -0.065355556 | 0.955709752 |
| 0.087166667  | -0.065377778 | 0.955695031 |
| -0.020966667 | -0.065422222 | 0.95566559  |
| 0.126033333  | -0.065444444 | 0.955650869 |
| 0.1035       | -0.065511111 | 0.95560671  |
| 0.0999       | -0.065533333 | 0.95559199  |
| 0.169066667  | -0.065544444 | 0.955584631 |
| -0.065233333 | -0.065555556 | 0.955577271 |
| -0.614533333 | -0.065588889 | 0.955555193 |
| -0.022466667 | -0.065644444 | 0.955518397 |
| -0.409366667 | -0.065644444 | 0.955518397 |
| 0.2025       | -0.065666667 | 0.955503679 |
| -0.004066667 | -0.065711111 | 0.955474244 |
| -0.1425      | -0.065722222 | 0.955466885 |
| -0.058466667 | -0.065766667 | 0.955437451 |
| -0.010666667 | -0.0658      | 0.955415376 |
| -0.173066667 | -0.065833333 | 0.955393301 |
| -0.1061      | -0.065877778 | 0.955363869 |
| -0.0613      | -0.065877778 | 0.955363869 |
| -0.057033333 | -0.0659      | 0.955349154 |
| -0.081033333 | -0.066066667 | 0.955238794 |
| 0.112566667  | -0.066077778 | 0.955231437 |
| -0.0684      | -0.066088889 | 0.95522408  |
| -0.193833333 | -0.066122222 | 0.95520201  |
| -0.0556      | -0.066177778 | 0.955165228 |
| -0.095233333 | -0.066188889 | 0.955157871 |
| -0.069133333 | -0.066277778 | 0.955099023 |
| -0.154966667 | -0.066277778 | 0.955099023 |
| -0.0083      | -0.066333333 | 0.955062245 |
| 0.073133333  | -0.066355556 | 0.955047534 |
| -0.067766667 | -0.066377778 | 0.955032823 |
| -0.1159      | -0.066422222 | 0.955003402 |
| -0.0729      | -0.066422222 | 0.955003402 |
| -0.0745      | -0.066422222 | 0.955003402 |
| -0.023133333 | -0.066488889 | 0.954959273 |
| 0.092633333  | -0.066566667 | 0.954907791 |
| 0.059733333  | -0.066611111 | 0.954878374 |

|              |              |             |
|--------------|--------------|-------------|
| -0.049       | -0.066622222 | 0.95487102  |
| 0.085066667  | -0.066622222 | 0.95487102  |
| -0.075233333 | -0.066677778 | 0.95483425  |
| -0.456333333 | -0.066711111 | 0.954812189 |
| -0.224633333 | -0.066766667 | 0.954775422 |
| 0.050133333  | -0.066933333 | 0.954665128 |
| -0.085766667 | -0.066988889 | 0.954628366 |
| 0.106833333  | -0.067       | 0.954621014 |
| -0.010233333 | -0.067033333 | 0.954598958 |
| 0.088933333  | -0.067188889 | 0.954496036 |
| -0.047766667 | -0.067211111 | 0.954481334 |
| 0.062633333  | -0.067211111 | 0.954481334 |
| 0.169233333  | -0.067233333 | 0.954466632 |
| -0.1679      | -0.067322222 | 0.954407826 |
| 0.1311       | -0.067333333 | 0.954400475 |
| -0.0178      | -0.067366667 | 0.954378424 |
| -0.0774      | -0.067388889 | 0.954363724 |
| -0.030166667 | -0.067488889 | 0.954297575 |
| 0.042        | -0.067511111 | 0.954282875 |
| -0.000133333 | -0.067511111 | 0.954282875 |
| -0.033866667 | -0.067555556 | 0.954253478 |
| -0.2195      | -0.067588889 | 0.95423143  |
| -0.0043      | -0.067611111 | 0.954216732 |
| 0.038933333  | -0.067622222 | 0.954209383 |
| 0.064333333  | -0.067655556 | 0.954187336 |
| -0.145966667 | -0.067733333 | 0.954135896 |
| 0.042433333  | -0.067755556 | 0.954121199 |
| -3.33E-05    | -0.067777778 | 0.954106503 |
| -0.099466667 | -0.067788889 | 0.954099155 |
| -0.132033333 | -0.067877778 | 0.954040372 |
| -0.153166667 | -0.067922222 | 0.954010981 |
| 0.144833333  | -0.067977778 | 0.953974245 |
| -0.3018      | -0.068       | 0.953959551 |
| 0.178333333  | -0.068033333 | 0.95393751  |
| 0.070833333  | -0.068088889 | 0.953900776 |
| -0.047333333 | -0.068122222 | 0.953878736 |
| -0.123866667 | -0.068144444 | 0.953864044 |
| 0.0983       | -0.068155556 | 0.953856697 |
| -0.006733333 | -0.068166667 | 0.953849351 |
| -0.053233333 | -0.068177778 | 0.953842005 |
| 0.052333333  | -0.068211111 | 0.953819967 |
| 0.0948       | -0.068211111 | 0.953819967 |
| -0.232366667 | -0.068233333 | 0.953805275 |
| -0.085133333 | -0.068233333 | 0.953805275 |
| -0.210466667 | -0.068255556 | 0.953790583 |
| 0.0078       | -0.068333333 | 0.953739165 |
| -0.0359      | -0.068377778 | 0.953709784 |



|              |              |             |
|--------------|--------------|-------------|
| -0.174133333 | -0.068388889 | 0.953702439 |
| -0.087866667 | -0.0684      | 0.953695093 |
| 0.025833333  | -0.068411111 | 0.953687748 |
| -0.011       | -0.068455556 | 0.953658369 |
| 0.010866667  | -0.068455556 | 0.953658369 |
| -0.206866667 | -0.068466667 | 0.953651024 |
| 0.02         | -0.068488889 | 0.953636335 |
| -0.119       | -0.0685      | 0.953628991 |
| -0.096333333 | -0.068522222 | 0.953614302 |
| -0.3367      | -0.0686      | 0.953562892 |
| 0.015233333  | -0.068733333 | 0.953474769 |
| -0.144566667 | -0.068744444 | 0.953467425 |
| 0.0436       | -0.068788889 | 0.953438053 |
| -0.153566667 | -0.068788889 | 0.953438053 |
| -0.031       | -0.068811111 | 0.953423367 |
| 0.2232       | -0.068822222 | 0.953416024 |
| 0.051133333  | -0.068866667 | 0.953386653 |
| -0.192966667 | -0.068877778 | 0.95337931  |
| -0.0172      | -0.068877778 | 0.95337931  |
| 0.079633333  | -0.068888889 | 0.953371968 |
| 0.092366667  | -0.068911111 | 0.953357283 |
| 0.0204       | -0.068988889 | 0.953305887 |
| -0.006966667 | -0.069       | 0.953298545 |
| -0.080866667 | -0.069044444 | 0.953269178 |
| -0.0385      | -0.069066667 | 0.953254495 |
| -0.143666667 | -0.069088889 | 0.953239811 |
| 0.149        | -0.069122222 | 0.953217787 |
| -0.2033      | -0.069144444 | 0.953203105 |
| -0.0724      | -0.069211111 | 0.953159058 |
| -0.009866667 | -0.069233333 | 0.953144377 |
| -0.1042      | -0.069244444 | 0.953137036 |
| -0.0493      | -0.069322222 | 0.953085652 |
| -0.0586      | -0.069344444 | 0.953070972 |
| 0.097033333  | -0.069388889 | 0.953041611 |
| -0.182       | -0.069444444 | 0.953004912 |
| 0.0463       | -0.069444444 | 0.953004912 |
| -0.000866667 | -0.069444444 | 0.953004912 |
| -0.006266667 | -0.069466667 | 0.952990233 |
| 0.2228       | -0.069533333 | 0.952946196 |
| 0.083633333  | -0.069588889 | 0.952909501 |
| -0.093133333 | -0.069633333 | 0.952880146 |
| -0.142466667 | -0.069644444 | 0.952872807 |
| 0.1222       | -0.069655556 | 0.952865468 |
| -0.061966667 | -0.0697      | 0.952836114 |
| -0.019966667 | -0.069722222 | 0.952821437 |
| -0.104866667 | -0.069777778 | 0.952784747 |
| -0.1016      | -0.069844444 | 0.95274072  |

|              |              |             |
|--------------|--------------|-------------|
| 0.0124       | -0.069877778 | 0.952718707 |
| -0.173566667 | -0.069888889 | 0.95271137  |
| -0.1815      | -0.070133333 | 0.95254996  |
| 0.118033333  | -0.070133333 | 0.95254996  |
| -0.183166667 | -0.070188889 | 0.952513279 |
| -0.0728      | -0.070188889 | 0.952513279 |
| 0.272466667  | -0.070233333 | 0.952483936 |
| 0.104833333  | -0.070266667 | 0.952461929 |
| -0.04        | -0.070277778 | 0.952454594 |
| 0.135466667  | -0.070288889 | 0.952447259 |
| -0.008733333 | -0.070411111 | 0.952366573 |
| -0.350133333 | -0.070433333 | 0.952351903 |
| 0.1569       | -0.070433333 | 0.952351903 |
| -0.1214      | -0.070433333 | 0.952351903 |
| -0.042866667 | -0.070455556 | 0.952337234 |
| -0.127466667 | -0.070455556 | 0.952337234 |
| 0.020733333  | -0.070533333 | 0.952285893 |
| 0.0174       | -0.070566667 | 0.952263891 |
| -0.1279      | -0.070633333 | 0.952219888 |
| 0.058733333  | -0.070655556 | 0.952205221 |
| -0.145933333 | -0.0707      | 0.952175887 |
| 0.0694       | -0.0708      | 0.95210989  |
| -0.040133333 | -0.070844444 | 0.952080559 |
| -0.016666667 | -0.070911111 | 0.952036565 |
| -0.6327      | -0.070955556 | 0.952007236 |
| 0.002833333  | -0.070988889 | 0.95198524  |
| 0.007833333  | -0.070988889 | 0.95198524  |
| 0.088566667  | -0.071       | 0.951977908 |
| -0.048066667 | -0.071033333 | 0.951955913 |
| -0.109633333 | -0.071044444 | 0.951948582 |
| -0.275       | -0.071055556 | 0.95194125  |
| -0.003733333 | -0.071122222 | 0.951897262 |
| 0.075666667  | -0.0713      | 0.951779971 |
| -0.0048      | -0.071322222 | 0.95176531  |
| -0.205       | -0.071355556 | 0.95174332  |
| -0.167566667 | -0.071433333 | 0.951692012 |
| -0.181166667 | -0.071444444 | 0.951684682 |
| -0.212233333 | -0.0715      | 0.951648035 |
| -0.0989      | -0.071511111 | 0.951640706 |
| -0.2712      | -0.071522222 | 0.951633377 |
| -0.164933333 | -0.071622222 | 0.951567417 |
| 0.085366667  | -0.071633333 | 0.951560088 |
| 0.069933333  | -0.071644444 | 0.95155276  |
| 0.0335       | -0.071688889 | 0.951523446 |
| 0.088466667  | -0.071788889 | 0.951457494 |
| 0.0016       | -0.071833333 | 0.951428183 |
| -0.4186      | -0.071833333 | 0.951428183 |

|              |              |             |
|--------------|--------------|-------------|
| -0.0943      | -0.071844444 | 0.951420856 |
| 0.119866667  | -0.071877778 | 0.951398874 |
| 0.342033333  | -0.071911111 | 0.951376892 |
| -0.0302      | -0.071966667 | 0.951340257 |
| -0.002866667 | -0.072       | 0.951318276 |
| -0.033033333 | -0.072011111 | 0.95131095  |
| 0.1637       | -0.072011111 | 0.95131095  |
| 0.033266667  | -0.072044444 | 0.95128897  |
| 0.001566667  | -0.072088889 | 0.951259664 |
| 0.000266667  | -0.072188889 | 0.95119373  |
| 0.08         | -0.0722      | 0.951186405 |
| -0.141466667 | -0.072244444 | 0.951157102 |
| -0.007133333 | -0.072244444 | 0.951157102 |
| -0.1625      | -0.072266667 | 0.951142452 |
| 0.095        | -0.0723      | 0.951120476 |
| -0.019466667 | -0.072366667 | 0.951076526 |
| -0.066566667 | -0.072411111 | 0.951047227 |
| 0.062333333  | -0.072411111 | 0.951047227 |
| -0.188266667 | -0.072444444 | 0.951025253 |
| -0.1152      | -0.072444444 | 0.951025253 |
| -0.0516      | -0.072488889 | 0.950995956 |
| -0.0263      | -0.072488889 | 0.950995956 |
| -0.146966667 | -0.072633333 | 0.950900746 |
| -0.096766667 | -0.072655556 | 0.950886099 |
| 0.0215       | -0.072655556 | 0.950886099 |
| -0.219033333 | -0.072688889 | 0.950864129 |
| -0.0359      | -0.072688889 | 0.950864129 |
| -0.006466667 | -0.072688889 | 0.950864129 |
| 0.120666667  | -0.072711111 | 0.950849483 |
| -0.193466667 | -0.072711111 | 0.950849483 |
| 0.039133333  | -0.072733333 | 0.950834837 |
| 0.025633333  | -0.072822222 | 0.950776255 |
| 0.079033333  | -0.072844444 | 0.95076161  |
| -0.009466667 | -0.0729      | 0.950724998 |
| 0.054366667  | -0.072911111 | 0.950717676 |
| -0.1702      | -0.072911111 | 0.950717676 |
| -0.080733333 | -0.072944444 | 0.95069571  |
| -0.1731      | -0.072988889 | 0.950666423 |
| 0.022966667  | -0.073       | 0.950659101 |
| 0.0735       | -0.073077778 | 0.950607851 |
| -0.0239      | -0.073155556 | 0.950556604 |
| -0.077733333 | -0.073155556 | 0.950556604 |
| 0.0928       | -0.073166667 | 0.950549283 |
| -0.071433333 | -0.073188889 | 0.950534642 |
| -0.035533333 | -0.0732      | 0.950527321 |
| 0.2127       | -0.073344444 | 0.950432158 |
| -0.037033333 | -0.073433333 | 0.950373601 |

|              |              |             |
|--------------|--------------|-------------|
| 0.0174       | -0.073455556 | 0.950358962 |
| -0.114133333 | -0.073488889 | 0.950337004 |
| 0.011966667  | -0.073511111 | 0.950322366 |
| -0.062633333 | -0.073511111 | 0.950322366 |
| -0.078433333 | -0.073544444 | 0.950300409 |
| 0.045033333  | -0.073544444 | 0.950300409 |
| -0.1032      | -0.073577778 | 0.950278453 |
| 0.008033333  | -0.073622222 | 0.950249178 |
| -0.065233333 | -0.073633333 | 0.95024186  |
| 0.075833333  | -0.073633333 | 0.95024186  |
| 0.170333333  | -0.0737      | 0.95019795  |
| -0.112933333 | -0.073744444 | 0.950168679 |
| -0.1786      | -0.073744444 | 0.950168679 |
| -0.100666667 | -0.073755556 | 0.950161361 |
| -0.3909      | -0.073888889 | 0.950073551 |
| -0.053466667 | -0.073933333 | 0.950044283 |
| -0.158166667 | -0.073944444 | 0.950036966 |
| 0.027666667  | -0.074066667 | 0.949956485 |
| -0.169033333 | -0.074111111 | 0.94992722  |
| -0.033       | -0.074111111 | 0.94992722  |
| 0.097333333  | -0.074122222 | 0.949919904 |
| -0.3228      | -0.074133333 | 0.949912588 |
| 0.007266667  | -0.074166667 | 0.949890641 |
| -0.232766667 | -0.074188889 | 0.94987601  |
| 0.053433333  | -0.0742      | 0.949868694 |
| 0.0403       | -0.074222222 | 0.949854063 |
| -0.2509      | -0.0743      | 0.949802856 |
| 0.029566667  | -0.074311111 | 0.949795541 |
| -0.056366667 | -0.074333333 | 0.949780912 |
| 0.1111       | -0.074455556 | 0.949700451 |
| 0.064633333  | -0.074477778 | 0.949685823 |
| -0.0419      | -0.074477778 | 0.949685823 |
| 0.0836       | -0.0745      | 0.949671195 |
| -0.040633333 | -0.0745      | 0.949671195 |
| -0.0776      | -0.074677778 | 0.949554178 |
| -0.009766667 | -0.074677778 | 0.949554178 |
| 0.2393       | -0.074777778 | 0.949488362 |
| -0.110266667 | -0.074777778 | 0.949488362 |
| 0.006266667  | -0.074788889 | 0.949481049 |
| -0.091466667 | -0.074833333 | 0.9494518   |
| 0.017833333  | -0.074866667 | 0.949429863 |
| -0.0602      | -0.074922222 | 0.949393303 |
| -0.057333333 | -0.074955556 | 0.949371367 |
| -0.0014      | -0.074988889 | 0.949349432 |
| -0.151233333 | -0.075       | 0.949342121 |
| -0.147633333 | -0.075066667 | 0.949298253 |
| 0.0575       | -0.0751      | 0.94927632  |

|              |              |             |
|--------------|--------------|-------------|
| 0.027833333  | -0.075133333 | 0.949254387 |
| -0.129066667 | -0.075155556 | 0.949239766 |
| -0.511866667 | -0.075155556 | 0.949239766 |
| -0.102366667 | -0.075277778 | 0.949159351 |
| -0.072033333 | -0.075288889 | 0.949152041 |
| 0.1201       | -0.075311111 | 0.949137421 |
| 0.012066667  | -0.075388889 | 0.949086253 |
| -0.183566667 | -0.075455556 | 0.949042397 |
| 0.004533333  | -0.075522222 | 0.948998543 |
| -0.107233333 | -0.075577778 | 0.948962    |
| -0.123366667 | -0.075577778 | 0.948962    |
| -0.001166667 | -0.075588889 | 0.948954691 |
| 0.078666667  | -0.075633333 | 0.948925458 |
| -0.100266667 | -0.075644444 | 0.948918149 |
| 0.0785       | -0.075655556 | 0.948910841 |
| 0.117033333  | -0.075677778 | 0.948896225 |
| -0.112933333 | -0.075711111 | 0.948874301 |
| -0.167833333 | -0.075744444 | 0.948852378 |
| -0.1399      | -0.075755556 | 0.94884507  |
| 0.0175       | -0.075788889 | 0.948823147 |
| 0.024366667  | -0.075811111 | 0.948808532 |
| -0.159766667 | -0.075811111 | 0.948808532 |
| -0.075033333 | -0.075822222 | 0.948801225 |
| -0.108033333 | -0.075833333 | 0.948793918 |
| -0.0914      | -0.075833333 | 0.948793918 |
| -0.122066667 | -0.075844444 | 0.948786611 |
| -0.0466      | -0.0759      | 0.948750075 |
| -0.023566667 | -0.075933333 | 0.948728155 |
| 0.197166667  | -0.076044444 | 0.94865509  |
| -0.003833333 | -0.076133333 | 0.948596642 |
| 0.143366667  | -0.076166667 | 0.948574725 |
| 0.006966667  | -0.076233333 | 0.948530893 |
| -0.1517      | -0.076377778 | 0.948435929 |
| -0.0825      | -0.076388889 | 0.948428625 |
| 0.1457       | -0.076422222 | 0.948406712 |
| 0.0172       | -0.076422222 | 0.948406712 |
| 0.136866667  | -0.076533333 | 0.948333672 |
| -0.074666667 | -0.076533333 | 0.948333672 |
| 0.0853       | -0.076588889 | 0.948297154 |
| 0.030566667  | -0.076633333 | 0.948267941 |
| -0.174533333 | -0.076644444 | 0.948260637 |
| 0.005366667  | -0.076644444 | 0.948260637 |
| -0.211766667 | -0.076655556 | 0.948253334 |
| -0.164033333 | -0.076722222 | 0.948209517 |
| -0.0788      | -0.076822222 | 0.948143794 |
| -0.268133333 | -0.076944444 | 0.948063473 |
| 0.009866667  | -0.076955556 | 0.948056171 |

|              |              |             |
|--------------|--------------|-------------|
| -0.031833333 | -0.077077778 | 0.947975857 |
| -0.050966667 | -0.077088889 | 0.947968556 |
| -0.018633333 | -0.077111111 | 0.947953954 |
| -0.0904      | -0.077133333 | 0.947939353 |
| -0.068566667 | -0.077166667 | 0.947917451 |
| -0.057633333 | -0.077211111 | 0.947888249 |
| -0.444766667 | -0.077222222 | 0.947880949 |
| -0.1335      | -0.077244444 | 0.947866349 |
| 0.213966667  | -0.077277778 | 0.947844449 |
| -0.0492      | -0.0773      | 0.947829849 |
| -0.1051      | -0.077322222 | 0.947815249 |
| -0.009733333 | -0.077355556 | 0.94779335  |
| -0.071466667 | -0.077377778 | 0.947778751 |
| 0.048733333  | -0.077388889 | 0.947771452 |
| -0.091833333 | -0.077388889 | 0.947771452 |
| -0.069366667 | -0.077388889 | 0.947771452 |
| -0.004133333 | -0.0774      | 0.947764153 |
| -0.088666667 | -0.077433333 | 0.947742255 |
| -0.030833333 | -0.077488889 | 0.94770576  |
| 0.144233333  | -0.0775      | 0.947698461 |
| -0.1449      | -0.077533333 | 0.947676565 |
| 0.030166667  | -0.077533333 | 0.947676565 |
| 0.023933333  | -0.077544444 | 0.947669266 |
| -0.058733333 | -0.077588889 | 0.947640072 |
| -0.126666667 | -0.077633333 | 0.947610879 |
| -0.0276      | -0.077666667 | 0.947588985 |
| 0.058133333  | -0.077722222 | 0.947552496 |
| -0.027566667 | -0.077755556 | 0.947530603 |
| -0.0833      | -0.077788889 | 0.94750871  |
| 0.018266667  | -0.077844444 | 0.947472224 |
| 0.088933333  | -0.077877778 | 0.947450333 |
| -0.205933333 | -0.077877778 | 0.947450333 |
| 0.037333333  | -0.077911111 | 0.947428443 |
| 0.1156       | -0.077944444 | 0.947406553 |
| 0.010033333  | -0.077955556 | 0.947399256 |
| 0.0968       | -0.077977778 | 0.947384663 |
| -0.1123      | -0.078       | 0.947370071 |
| -0.0651      | -0.078022222 | 0.947355478 |
| 0.067433333  | -0.078077778 | 0.947318998 |
| -0.1598      | -0.078144444 | 0.947275223 |
| 0.059666667  | -0.078255556 | 0.947202271 |
| 0.065466667  | -0.078288889 | 0.947180386 |
| -0.0478      | -0.078311111 | 0.947165796 |
| 0.014366667  | -0.078322222 | 0.947158502 |
| 0.001466667  | -0.078355556 | 0.947136618 |
| -0.284166667 | -0.078355556 | 0.947136618 |
| -0.100466667 | -0.078366667 | 0.947129323 |

|              |              |             |
|--------------|--------------|-------------|
| 0.041666667  | -0.078388889 | 0.947114735 |
| -0.076033333 | -0.078388889 | 0.947114735 |
| -0.199466667 | -0.078433333 | 0.947085558 |
| 0.0128       | -0.078455556 | 0.94707097  |
| -0.0103      | -0.078477778 | 0.947056382 |
| -0.0505      | -0.078522222 | 0.947027207 |
| -0.2197      | -0.078522222 | 0.947027207 |
| -0.001266667 | -0.078566667 | 0.946998032 |
| 0.005366667  | -0.078566667 | 0.946998032 |
| -0.291533333 | -0.078622222 | 0.946961566 |
| -0.0669      | -0.078633333 | 0.946954273 |
| -0.1292      | -0.078677778 | 0.946925101 |
| 0.0202       | -0.0787      | 0.946910515 |
| 0.2135       | -0.078811111 | 0.94683759  |
| -0.012       | -0.078833333 | 0.946823006 |
| -0.016766667 | -0.078866667 | 0.94680113  |
| 0.0958       | -0.078877778 | 0.946793838 |
| -0.078366667 | -0.078888889 | 0.946786546 |
| 0.031533333  | -0.0789      | 0.946779255 |
| -0.0794      | -0.078933333 | 0.94675738  |
| 0.0113       | -0.079033333 | 0.946691758 |
| -0.0317      | -0.079044444 | 0.946684467 |
| 0.005366667  | -0.079055556 | 0.946677176 |
| 0.2008       | -0.079188889 | 0.946589688 |
| -0.048533333 | -0.079244444 | 0.946553237 |
| -0.045366667 | -0.079311111 | 0.946509498 |
| 0.0289       | -0.079388889 | 0.946458472 |
| 0.142166667  | -0.079411111 | 0.946443894 |
| 0.0478       | -0.079444444 | 0.946422026 |
| -0.162333333 | -0.079511111 | 0.946378293 |
| 0.090933333  | -0.079555556 | 0.946349139 |
| -0.073533333 | -0.079555556 | 0.946349139 |
| 0.038766667  | -0.079577778 | 0.946334563 |
| -0.025833333 | -0.079644444 | 0.946290834 |
| -0.0334      | -0.079711111 | 0.946247107 |
| -0.002633333 | -0.079711111 | 0.946247107 |
| -0.006066667 | -0.079822222 | 0.946174233 |
| -0.058166667 | -0.0799      | 0.946123225 |
| -0.160433333 | -0.079933333 | 0.946101365 |
| -0.080566667 | -0.079944444 | 0.946094078 |
| -0.071133333 | -0.079966667 | 0.946079506 |
| -0.046066667 | -0.080088889 | 0.945999359 |
| -0.007666667 | -0.080133333 | 0.945970216 |
| -0.027533333 | -0.080177778 | 0.945941075 |
| -0.0316      | -0.080188889 | 0.94593379  |
| -0.027       | -0.080222222 | 0.945911934 |
| -0.073       | -0.080255556 | 0.945890079 |

|              |              |             |
|--------------|--------------|-------------|
| 0.0696       | -0.080266667 | 0.945882794 |
| -0.164566667 | -0.0803      | 0.94586094  |
| -0.004533333 | -0.080377778 | 0.945809949 |
| 0.014166667  | -0.080388889 | 0.945802664 |
| 0.071533333  | -0.0805      | 0.945729825 |
| 0.008266667  | -0.080522222 | 0.945715258 |
| 0.049333333  | -0.080533333 | 0.945707974 |
| -0.002166667 | -0.080633333 | 0.945642425 |
| 0.078666667  | -0.080655556 | 0.945627859 |
| 0.0249       | -0.080655556 | 0.945627859 |
| -0.027166667 | -0.080677778 | 0.945613293 |
| -0.031666667 | -0.080744444 | 0.945569598 |
| -0.1347      | -0.080744444 | 0.945569598 |
| 0.168833333  | -0.080777778 | 0.945547751 |
| -0.040933333 | -0.0808      | 0.945533186 |
| 0.001366667  | -0.080811111 | 0.945525904 |
| -0.170066667 | -0.080866667 | 0.945489494 |
| 0.128        | -0.080944444 | 0.945438523 |
| 0.1591       | -0.081011111 | 0.945394836 |
| -0.0407      | -0.081044444 | 0.945372993 |
| 0.263333333  | -0.081066667 | 0.945358431 |
| 0.003666667  | -0.081133333 | 0.945314747 |
| 0.167666667  | -0.081188889 | 0.945278345 |
| -0.085633333 | -0.081211111 | 0.945263785 |
| 0.018933333  | -0.0813      | 0.945205546 |
| 0.0105       | -0.081377778 | 0.94515459  |
| -0.056166667 | -0.081377778 | 0.94515459  |
| -0.017266667 | -0.0814      | 0.945140032 |
| -0.042433333 | -0.081422222 | 0.945125474 |
| 0.019333333  | -0.081433333 | 0.945118195 |
| 0.1397       | -0.081444444 | 0.945110916 |
| -0.037566667 | -0.081511111 | 0.945067244 |
| 0.007633333  | -0.081633333 | 0.944987183 |
| -0.1337      | -0.081655556 | 0.944972627 |
| 0.112033333  | -0.081711111 | 0.944936238 |
| 0.127666667  | -0.081777778 | 0.944892574 |
| -0.046466667 | -0.081844444 | 0.944848912 |
| -0.043933333 | -0.081877778 | 0.944827081 |
| 0.029266667  | -0.081888889 | 0.944819805 |
| 0.123533333  | -0.082022222 | 0.944732489 |
| -0.045666667 | -0.082066667 | 0.944703385 |
| -0.021733333 | -0.082077778 | 0.94469611  |
| -0.039433333 | -0.082144444 | 0.944652456 |
| 0.0314       | -0.082155556 | 0.944645181 |
| -0.3824      | -0.082255556 | 0.944579706 |
| 0.147033333  | -0.082266667 | 0.944572431 |
| 0.020966667  | -0.082266667 | 0.944572431 |



|              |              |             |
|--------------|--------------|-------------|
| 0.1103       | -0.082355556 | 0.944514235 |
| -0.045333333 | -0.082388889 | 0.944492412 |
| -0.060433333 | -0.082477778 | 0.944434221 |
| -0.207066667 | -0.0825      | 0.944419673 |
| -0.0722      | -0.082677778 | 0.944303303 |
| -0.1287      | -0.082688889 | 0.944296031 |
| -0.045266667 | -0.082711111 | 0.944281486 |
| -0.037166667 | -0.082722222 | 0.944274213 |
| -0.125166667 | -0.082744444 | 0.944259668 |
| 0.158833333  | -0.082822222 | 0.944208763 |
| -0.2177      | -0.082855556 | 0.944186948 |
| -0.0071      | -0.082877778 | 0.944172404 |
| -0.235233333 | -0.082888889 | 0.944165133 |
| -0.075266667 | -0.0829      | 0.944157861 |
| -0.060766667 | -0.082911111 | 0.944150589 |
| -0.1129      | -0.082955556 | 0.944121504 |
| -0.1476      | -0.083       | 0.944092419 |
| 0.018233333  | -0.083044444 | 0.944063335 |
| 0.051766667  | -0.083133333 | 0.944005171 |
| -0.100533333 | -0.083166667 | 0.94398336  |
| 0.039933333  | -0.083166667 | 0.94398336  |
| -0.0926      | -0.083222222 | 0.943947009 |
| 0.094733333  | -0.083244444 | 0.943932469 |
| 0.014066667  | -0.083333333 | 0.943874313 |
| -0.135266667 | -0.083355556 | 0.943859774 |
| 0.000566667  | -0.0834      | 0.943830697 |
| -0.021233333 | -0.083488889 | 0.943772547 |
| 0.1073       | -0.083488889 | 0.943772547 |
| -0.049433333 | -0.083533333 | 0.943743473 |
| -0.138033333 | -0.083544444 | 0.943736205 |
| 0.092466667  | -0.083555556 | 0.943728936 |
| 0.166433333  | -0.083577778 | 0.9437144   |
| -0.1715      | -0.0836      | 0.943699864 |
| 0.277666667  | -0.083622222 | 0.943685328 |
| 0.150933333  | -0.083677778 | 0.943648989 |
| -0.009266667 | -0.083722222 | 0.943619919 |
| -0.498466667 | -0.083722222 | 0.943619919 |
| -0.075233333 | -0.0838      | 0.943569048 |
| 0.136333333  | -0.0838      | 0.943569048 |
| 0.0267       | -0.0838      | 0.943569048 |
| -0.0139      | -0.083922222 | 0.943489114 |
| -0.108166667 | -0.083955556 | 0.943467315 |
| -0.0731      | -0.083988889 | 0.943445517 |
| 0.1197       | -0.084       | 0.943438251 |
| -0.1399      | -0.084044444 | 0.943409187 |
| 0.041733333  | -0.084044444 | 0.943409187 |
| 0.0501       | -0.084066667 | 0.943394656 |

|              |              |             |
|--------------|--------------|-------------|
| 0.086366667  | -0.084133333 | 0.943351063 |
| -0.014633333 | -0.0842      | 0.943307472 |
| -0.151066667 | -0.084222222 | 0.943292942 |
| 0.005566667  | -0.084222222 | 0.943292942 |
| -0.147866667 | -0.084233333 | 0.943285677 |
| -0.0802      | -0.084255556 | 0.943271147 |
| -0.007133333 | -0.084255556 | 0.943271147 |
| -0.189433333 | -0.084288889 | 0.943249353 |
| -0.065       | -0.084355556 | 0.943205767 |
| 0.061666667  | -0.084477778 | 0.943125864 |
| -0.467       | -0.084488889 | 0.9431186   |
| -0.156966667 | -0.0845      | 0.943111337 |
| 0.246566667  | -0.084566667 | 0.943067757 |
| -0.0588      | -0.084655556 | 0.943009653 |
| 0.054266667  | -0.084666667 | 0.943002391 |
| -0.176633333 | -0.084711111 | 0.94297334  |
| 0.0299       | -0.084722222 | 0.942966078 |
| -0.2723      | -0.084766667 | 0.942937029 |
| -0.065166667 | -0.084777778 | 0.942929767 |
| -0.000533333 | -0.0848      | 0.942915243 |
| -0.0264      | -0.084811111 | 0.942907981 |
| -0.064933333 | -0.084822222 | 0.942900719 |
| -0.083933333 | -0.084844444 | 0.942886195 |
| -0.029666667 | -0.084855556 | 0.942878933 |
| -0.197       | -0.084877778 | 0.94286441  |
| -0.160233333 | -0.084888889 | 0.942857149 |
| -0.118666667 | -0.084933333 | 0.942828103 |
| -0.0471      | -0.084944444 | 0.942820842 |
| -0.148566667 | -0.084944444 | 0.942820842 |
| 0.021166667  | -0.084955556 | 0.94281358  |
| 0.006766667  | -0.085033333 | 0.942762753 |
| 0.060933333  | -0.085066667 | 0.942740971 |
| 0.0895       | -0.085155556 | 0.942682888 |
| 0.0152       | -0.085166667 | 0.942675627 |
| -0.135766667 | -0.085166667 | 0.942675627 |
| 0.1074       | -0.085177778 | 0.942668367 |
| -0.206966667 | -0.085233333 | 0.942632068 |
| 0.0587       | -0.085255556 | 0.942617548 |
| 0.012666667  | -0.085255556 | 0.942617548 |
| 0.004166667  | -0.085255556 | 0.942617548 |
| 0.040833333  | -0.085288889 | 0.942595769 |
| -0.155166667 | -0.0853      | 0.94258851  |
| -0.0713      | -0.085355556 | 0.942552213 |
| -0.014366667 | -0.085366667 | 0.942544954 |
| -0.002933333 | -0.085422222 | 0.942508659 |
| 0.2032       | -0.085466667 | 0.942479624 |
| 0.0258       | -0.0855      | 0.942457848 |

|              |              |             |
|--------------|--------------|-------------|
| -0.007766667 | -0.085555556 | 0.942421557 |
| -0.242466667 | -0.085622222 | 0.942378009 |
| 0.0392       | -0.085644444 | 0.942363493 |
| 0.012633333  | -0.085666667 | 0.942348978 |
| -0.0048      | -0.085677778 | 0.94234172  |
| -0.073733333 | -0.085733333 | 0.942305433 |
| -0.026       | -0.085744444 | 0.942298176 |
| -0.110833333 | -0.085788889 | 0.942269147 |
| 0.066133333  | -0.0858      | 0.94226189  |
| 0.0125       | -0.085833333 | 0.942240119 |
| -0.097166667 | -0.085833333 | 0.942240119 |
| -0.016233333 | -0.085922222 | 0.942182067 |
| -0.130766667 | -0.085988889 | 0.94213853  |
| 0.035966667  | -0.086111111 | 0.942058717 |
| -0.243133333 | -0.086133333 | 0.942044207 |
| 0.027366667  | -0.086177778 | 0.942015186 |
| 0.025533333  | -0.086244444 | 0.941971656 |
| -0.081133333 | -0.086255556 | 0.941964402 |
| -0.253033333 | -0.086266667 | 0.941957147 |
| -0.180833333 | -0.086277778 | 0.941949893 |
| -0.028633333 | -0.0863      | 0.941935384 |
| -0.113266667 | -0.086311111 | 0.941928129 |
| -0.1547      | -0.086355556 | 0.941899112 |
| -0.1235      | -0.0864      | 0.941870096 |
| 0.057366667  | -0.086433333 | 0.941848334 |
| -0.070366667 | -0.086488889 | 0.941812066 |
| -0.063866667 | -0.086522222 | 0.941790306 |
| -0.022166667 | -0.086622222 | 0.941725028 |
| -0.033766667 | -0.086622222 | 0.941725028 |
| -0.029566667 | -0.086666667 | 0.941696017 |
| -0.2477      | -0.086666667 | 0.941696017 |
| 0.012433333  | -0.086711111 | 0.941667007 |
| -0.001433333 | -0.086744444 | 0.941645251 |
| -0.168233333 | -0.086755556 | 0.941637998 |
| 0.132766667  | -0.086777778 | 0.941623494 |
| -0.0648      | -0.086788889 | 0.941616242 |
| -0.2745      | -0.086844444 | 0.941579983 |
| -0.009633333 | -0.086855556 | 0.941572731 |
| -0.1535      | -0.086877778 | 0.941558228 |
| 0.0954       | -0.086877778 | 0.941558228 |
| -0.0772      | -0.086877778 | 0.941558228 |
| -0.110366667 | -0.086888889 | 0.941550977 |
| -0.240333333 | -0.086977778 | 0.941492967 |
| -0.034933333 | -0.087       | 0.941478465 |
| -0.0421      | -0.087088889 | 0.941420459 |
| -0.365066667 | -0.0871      | 0.941413208 |
| 0.010666667  | -0.087288889 | 0.941289959 |

|              |              |             |
|--------------|--------------|-------------|
| -0.022333333 | -0.087288889 | 0.941289959 |
| 0.167766667  | -0.087333333 | 0.941260962 |
| -0.032266667 | -0.087333333 | 0.941260962 |
| -0.071266667 | -0.087388889 | 0.941224716 |
| -0.0222      | -0.0875      | 0.94115223  |
| -0.019133333 | -0.087511111 | 0.941144981 |
| -0.046666667 | -0.087544444 | 0.941123236 |
| -0.2151      | -0.087566667 | 0.94110874  |
| -0.1201      | -0.087588889 | 0.941094244 |
| 0.003433333  | -0.087633333 | 0.941065253 |
| -0.044966667 | -0.087688889 | 0.941029015 |
| 0.134733333  | -0.0877      | 0.941021767 |
| -0.1517      | -0.087722222 | 0.941007272 |
| 0.1337       | -0.087733333 | 0.941000025 |
| 0.293566667  | -0.087744444 | 0.940992778 |
| -0.019233333 | -0.087755556 | 0.940985531 |
| -0.014766667 | -0.087755556 | 0.940985531 |
| 0.0556       | -0.0879      | 0.940891323 |
| 0.023766667  | -0.087933333 | 0.940869584 |
| -0.066       | -0.087933333 | 0.940869584 |
| 0.042533333  | -0.087955556 | 0.940855092 |
| 0.064166667  | -0.087966667 | 0.940847845 |
| 0.0989       | -0.088077778 | 0.940775388 |
| 0.067933333  | -0.088166667 | 0.940717425 |
| 0.090833333  | -0.088211111 | 0.940688445 |
| -0.095566667 | -0.088255556 | 0.940659467 |
| -0.010666667 | -0.088288889 | 0.940637733 |
| 0.0953       | -0.088288889 | 0.940637733 |
| -0.052033333 | -0.088377778 | 0.940579779 |
| -0.055366667 | -0.0885      | 0.940500099 |
| -0.0217      | -0.088511111 | 0.940492855 |
| -0.085233333 | -0.088555556 | 0.940463882 |
| -0.0534      | -0.088577778 | 0.940449396 |
| -0.0113      | -0.088633333 | 0.940413182 |
| -0.187733333 | -0.088688889 | 0.940376969 |
| -0.014266667 | -0.088688889 | 0.940376969 |
| -0.280633333 | -0.088722222 | 0.940355242 |
| -0.097533333 | -0.088722222 | 0.940355242 |
| -0.029166667 | -0.088766667 | 0.940326273 |
| 0.020733333  | -0.088811111 | 0.940297306 |
| -0.119466667 | -0.088822222 | 0.940290064 |
| 0.375533333  | -0.088877778 | 0.940253856 |
| 0.053366667  | -0.0889      | 0.940239373 |
| -0.024766667 | -0.088933333 | 0.940217649 |
| -0.2943      | -0.088944444 | 0.940210408 |
| -0.090133333 | -0.088955556 | 0.940203166 |
| -0.1419      | -0.088955556 | 0.940203166 |

|              |              |             |
|--------------|--------------|-------------|
| 0.067333333  | -0.088966667 | 0.940195925 |
| -0.0472      | -0.089       | 0.940174203 |
| -0.143833333 | -0.089022222 | 0.940159721 |
| 0.008233333  | -0.089066667 | 0.940130758 |
| 0.022833333  | -0.089111111 | 0.940101797 |
| -0.037433333 | -0.089133333 | 0.940087316 |
| -0.0625      | -0.089144444 | 0.940080076 |
| 0.0184       | -0.089188889 | 0.940051116 |
| -0.148633333 | -0.0892      | 0.940043876 |
| -0.093833333 | -0.089233333 | 0.940022156 |
| 0.013633333  | -0.089233333 | 0.940022156 |
| -0.009066667 | -0.089255556 | 0.940007677 |
| -0.174566667 | -0.089266667 | 0.940000437 |
| 0.344833333  | -0.089288889 | 0.939985959 |
| -0.170633333 | -0.089311111 | 0.93997148  |
| -0.131133333 | -0.089355556 | 0.939942523 |
| -0.4279      | -0.089366667 | 0.939935284 |
| 0.047266667  | -0.089377778 | 0.939928045 |
| -0.088166667 | -0.089433333 | 0.939891851 |
| -0.144633333 | -0.089444444 | 0.939884612 |
| 0.117966667  | -0.089511111 | 0.939841181 |
| -0.098466667 | -0.089544444 | 0.939819466 |
| -0.149433333 | -0.089555556 | 0.939812228 |
| -0.062066667 | -0.089555556 | 0.939812228 |
| -0.005733333 | -0.089588889 | 0.939790514 |
| -0.046466667 | -0.089688889 | 0.939725375 |
| 0.1317       | -0.089733333 | 0.939696426 |
| -0.024233333 | -0.089855556 | 0.93961682  |
| 0.0914       | -0.089855556 | 0.93961682  |
| -0.078566667 | -0.089877778 | 0.939602347 |
| 0.064066667  | -0.0899      | 0.939587874 |
| 0.072333333  | -0.089955556 | 0.939551693 |
| -0.020233333 | -0.089988889 | 0.939529985 |
| 0.015866667  | -0.090011111 | 0.939515513 |
| 0.001133333  | -0.090066667 | 0.939479335 |
| -0.234033333 | -0.090211111 | 0.939385278 |
| -0.233766667 | -0.090244444 | 0.939363574 |
| -0.0023      | -0.090333333 | 0.939305698 |
| 0.063366667  | -0.090333333 | 0.939305698 |
| -0.050933333 | -0.090377778 | 0.939276762 |
| -0.108866667 | -0.090422222 | 0.939247827 |
| -0.093266667 | -0.090511111 | 0.939189959 |
| -0.006133333 | -0.090555556 | 0.939161026 |
| -0.2931      | -0.090688889 | 0.939074233 |
| -0.131766667 | -0.090733333 | 0.939045304 |
| -0.055166667 | -0.090733333 | 0.939045304 |
| -0.173       | -0.090888889 | 0.938944059 |

|              |              |             |
|--------------|--------------|-------------|
| -0.114333333 | -0.090966667 | 0.93889344  |
| -0.093833333 | -0.090966667 | 0.93889344  |
| -0.0373      | -0.090966667 | 0.93889344  |
| -0.206933333 | -0.091022222 | 0.938857286 |
| -0.182833333 | -0.091033333 | 0.938850055 |
| -0.046766667 | -0.091133333 | 0.938784981 |
| -0.109566667 | -0.091255556 | 0.938705453 |
| -0.047266667 | -0.091288889 | 0.938683764 |
| 0.039066667  | -0.091333333 | 0.938654847 |
| -0.1452      | -0.091355556 | 0.938640389 |
| -0.195966667 | -0.091388889 | 0.938618702 |
| -0.036033333 | -0.091411111 | 0.938604244 |
| -0.096733333 | -0.091411111 | 0.938604244 |
| -0.247266667 | -0.091433333 | 0.938589787 |
| -0.2397      | -0.091444444 | 0.938582558 |
| 0.012533333  | -0.091477778 | 0.938560872 |
| 0.206866667  | -0.091522222 | 0.938531959 |
| 0.016133333  | -0.091588889 | 0.938488591 |
| -0.444166667 | -0.091611111 | 0.938474135 |
| -0.132       | -0.091622222 | 0.938466907 |
| -0.124833333 | -0.091666667 | 0.938437997 |
| -0.013966667 | -0.091711111 | 0.938409087 |
| -0.128866667 | -0.091755556 | 0.938380178 |
| -0.3951      | -0.091766667 | 0.938372951 |
| 0.0546       | -0.091877778 | 0.938300684 |
| -0.0022      | -0.091877778 | 0.938300684 |
| 0.030433333  | -0.091933333 | 0.938264553 |
| 0.13         | -0.091977778 | 0.938235648 |
| 0.0284       | -0.092044444 | 0.938192294 |
| -0.0134      | -0.092077778 | 0.938170617 |
| 0.0004       | -0.092133333 | 0.93813449  |
| -0.106133333 | -0.092177778 | 0.93810559  |
| -0.029633333 | -0.092177778 | 0.93810559  |
| -0.091466667 | -0.0922      | 0.93809114  |
| -0.005933333 | -0.0922      | 0.93809114  |
| -0.151033333 | -0.092244444 | 0.938062242 |
| 0.009266667  | -0.092288889 | 0.938033344 |
| 0.1166       | -0.0924      | 0.937961102 |
| 0.2297       | -0.092477778 | 0.937910537 |
| -0.0695      | -0.092511111 | 0.937888867 |
| -0.0133      | -0.092522222 | 0.937881644 |
| -0.2491      | -0.092644444 | 0.937802192 |
| -0.173       | -0.092788889 | 0.937708302 |
| 0.089766667  | -0.092844444 | 0.937672194 |
| -0.1639      | -0.092922222 | 0.937621644 |
| 0.032266667  | -0.092988889 | 0.937578317 |
| -0.097233333 | -0.093       | 0.937571096 |

|              |              |             |
|--------------|--------------|-------------|
| -0.013333333 | -0.093033333 | 0.937549434 |
| 0.030766667  | -0.093133333 | 0.93748445  |
| -0.277166667 | -0.093155556 | 0.93747001  |
| 0.022766667  | -0.093266667 | 0.937397813 |
| 0.1395       | -0.093322222 | 0.937361716 |
| -0.0131      | -0.093344444 | 0.937347277 |
| -0.073166667 | -0.093355556 | 0.937340058 |
| 0.077933333  | -0.093422222 | 0.937296745 |
| -0.0078      | -0.093466667 | 0.937267871 |
| -0.273933333 | -0.093466667 | 0.937267871 |
| -0.188333333 | -0.093577778 | 0.937195688 |
| -0.1764      | -0.093588889 | 0.937188471 |
| -0.018366667 | -0.0936      | 0.937181253 |
| 0.038433333  | -0.093622222 | 0.937166817 |
| -0.077166667 | -0.093633333 | 0.937159599 |
| -0.0682      | -0.093711111 | 0.937109077 |
| -0.1653      | -0.093744444 | 0.937087426 |
| 0.003266667  | -0.093766667 | 0.937072992 |
| -0.083433333 | -0.093788889 | 0.937058558 |
| -0.157166667 | -0.093811111 | 0.937044124 |
| -0.006966667 | -0.093977778 | 0.936935879 |
| 0.0944       | -0.094011111 | 0.936914231 |
| -0.232866667 | -0.094033333 | 0.9368998   |
| -0.236133333 | -0.094122222 | 0.936842076 |
| -0.0448      | -0.094211111 | 0.936784356 |
| -0.253633333 | -0.094277778 | 0.936741069 |
| -0.0214      | -0.094322222 | 0.936712211 |
| -0.0083      | -0.094366667 | 0.936683355 |
| 0.183366667  | -0.094377778 | 0.936676141 |
| 0.094933333  | -0.094422222 | 0.936647286 |
| -0.117566667 | -0.094433333 | 0.936640072 |
| -0.2078      | -0.094444444 | 0.936632858 |
| -0.178333333 | -0.0945      | 0.936596791 |
| -0.095266667 | -0.094577778 | 0.936546299 |
| 0.046966667  | -0.094655556 | 0.93649581  |
| 0.0241       | -0.094711111 | 0.936459748 |
| -0.038666667 | -0.094788889 | 0.936409263 |
| 0.1673       | -0.0949      | 0.936337147 |
| -0.013466667 | -0.094911111 | 0.936329936 |
| -0.130133333 | -0.095       | 0.936272247 |
| 0.122833333  | -0.095       | 0.936272247 |
| -0.102233333 | -0.095022222 | 0.936257826 |
| -0.1927      | -0.095055556 | 0.936236194 |
| -0.124866667 | -0.095066667 | 0.936228983 |
| 0.072333333  | -0.095122222 | 0.936192932 |
| 0.2381       | -0.095144444 | 0.936178511 |
| -0.306033333 | -0.095177778 | 0.936156881 |

|              |              |             |
|--------------|--------------|-------------|
| 0.432766667  | -0.095255556 | 0.936106413 |
| -0.185733333 | -0.095288889 | 0.936084785 |
| -0.185766667 | -0.095355556 | 0.936041529 |
| 0.0323       | -0.095388889 | 0.936019902 |
| -0.111333333 | -0.095411111 | 0.936005485 |
| 0.053066667  | -0.095788889 | 0.935760419 |
| -0.368866667 | -0.095833333 | 0.935731592 |
| -0.1979      | -0.095855556 | 0.935717178 |
| -0.166733333 | -0.095877778 | 0.935702765 |
| 0.045133333  | -0.095911111 | 0.935681146 |
| -0.057966667 | -0.095966667 | 0.935645116 |
| -0.0066      | -0.095977778 | 0.93563791  |
| -0.0301      | -0.096066667 | 0.935580264 |
| -0.081166667 | -0.0961      | 0.935558648 |
| -0.1758      | -0.0962      | 0.935493802 |
| -0.089633333 | -0.096255556 | 0.935457778 |
| -0.1959      | -0.096255556 | 0.935457778 |
| -0.089266667 | -0.096255556 | 0.935457778 |
| -0.095833333 | -0.096311111 | 0.935421756 |
| 0.089366667  | -0.096344444 | 0.935400144 |
| -0.765933333 | -0.096355556 | 0.93539294  |
| -0.202333333 | -0.096477778 | 0.935313698 |
| -0.074166667 | -0.096488889 | 0.935306495 |
| -0.070333333 | -0.096566667 | 0.935256073 |
| -0.0531      | -0.096688889 | 0.935176843 |
| -0.009533333 | -0.0967      | 0.935169641 |
| 0.000233333  | -0.096711111 | 0.935162438 |
| -0.0516      | -0.096733333 | 0.935148034 |
| -0.115333333 | -0.096788889 | 0.935112024 |
| -0.163166667 | -0.096811111 | 0.93509762  |
| -0.217733333 | -0.096811111 | 0.93509762  |
| -0.0796      | -0.096944444 | 0.935011203 |
| 0.0283       | -0.096944444 | 0.935011203 |
| 0.024433333  | -0.096977778 | 0.9349896   |
| -0.012666667 | -0.097011111 | 0.934967997 |
| -0.092066667 | -0.097033333 | 0.934953595 |
| -0.225366667 | -0.097033333 | 0.934953595 |
| 0.030366667  | -0.097033333 | 0.934953595 |
| -0.1282      | -0.097033333 | 0.934953595 |
| -0.140566667 | -0.097088889 | 0.934917593 |
| -0.062566667 | -0.097111111 | 0.934903192 |
| -0.047266667 | -0.097122222 | 0.934895992 |
| -0.021166667 | -0.097144444 | 0.934881592 |
| -0.1538      | -0.097166667 | 0.934867191 |
| 0.0154       | -0.097433333 | 0.934694407 |
| -0.063533333 | -0.097466667 | 0.934672811 |
| 0.118466667  | -0.097533333 | 0.934629621 |



|              |              |             |
|--------------|--------------|-------------|
| -0.062233333 | -0.097555556 | 0.934615225 |
| 0.0784       | -0.097555556 | 0.934615225 |
| -0.117633333 | -0.097622222 | 0.934572038 |
| 0.043166667  | -0.097644444 | 0.934557642 |
| -0.0075      | -0.097655556 | 0.934550445 |
| 0.049233333  | -0.097677778 | 0.93453605  |
| 0.124733333  | -0.097677778 | 0.93453605  |
| -0.133833333 | -0.097755556 | 0.934485669 |
| 0.016033333  | -0.097822222 | 0.934442488 |
| -0.120933333 | -0.097844444 | 0.934428094 |
| 0.107866667  | -0.097877778 | 0.934406505 |
| -0.0603      | -0.097877778 | 0.934406505 |
| -0.095566667 | -0.0979      | 0.934392112 |
| -0.156033333 | -0.097944444 | 0.934363327 |
| 0.130933333  | -0.097955556 | 0.934356131 |
| -0.126666667 | -0.098044444 | 0.934298564 |
| 0.015566667  | -0.098322222 | 0.934118691 |
| 0.011666667  | -0.098377778 | 0.93408272  |
| -0.1912      | -0.098388889 | 0.934075526 |
| -0.0746      | -0.098433333 | 0.934046751 |
| -0.134566667 | -0.098455556 | 0.934032364 |
| -0.1236      | -0.098455556 | 0.934032364 |
| -0.358033333 | -0.098466667 | 0.93402517  |
| -0.613333333 | -0.098588889 | 0.933946045 |
| -0.0798      | -0.098633333 | 0.933917274 |
| -0.013366667 | -0.098655556 | 0.933902888 |
| -0.0793      | -0.098666667 | 0.933895696 |
| -0.0548      | -0.098688889 | 0.933881311 |
| 0.046766667  | -0.098711111 | 0.933866926 |
| -0.040933333 | -0.098733333 | 0.933852542 |
| 0.128533333  | -0.098744444 | 0.933845349 |
| -0.138033333 | -0.098788889 | 0.933816581 |
| -0.021166667 | -0.0988      | 0.933809389 |
| -0.051933333 | -0.099       | 0.933679945 |
| 0.006133333  | -0.099011111 | 0.933672754 |
| 0.0049       | -0.099011111 | 0.933672754 |
| -0.019666667 | -0.099077778 | 0.93362961  |
| -0.2148      | -0.099088889 | 0.93362242  |
| 0.080533333  | -0.099155556 | 0.933579278 |
| 0.0259       | -0.099166667 | 0.933572088 |
| 0.0354       | -0.099211111 | 0.933543329 |
| -0.214766667 | -0.099255556 | 0.93351457  |
| -0.5301      | -0.099333333 | 0.933464244 |
| 0.0028       | -0.099366667 | 0.933442677 |
| -0.0369      | -0.099388889 | 0.933428299 |
| -0.128133333 | -0.099433333 | 0.933399543 |
| -0.114466667 | -0.099488889 | 0.933363601 |

|              |              |             |
|--------------|--------------|-------------|
| -0.059933333 | -0.0995      | 0.933356412 |
| 0.1084       | -0.0995      | 0.933356412 |
| -0.0767      | -0.099588889 | 0.933298907 |
| -0.257166667 | -0.099588889 | 0.933298907 |
| -0.1299      | -0.0996      | 0.933291719 |
| 0.010933333  | -0.099677778 | 0.933241405 |
| -0.120966667 | -0.099711111 | 0.933219843 |
| 0.074633333  | -0.099766667 | 0.933183907 |
| -0.428866667 | -0.099822222 | 0.933147973 |
| -0.0693      | -0.099855556 | 0.933126413 |
| -0.0958      | -0.0999      | 0.933097667 |
| -0.137166667 | -0.099955556 | 0.933061735 |
| -0.078933333 | -0.100011111 | 0.933025806 |
| -0.1108      | -0.100066667 | 0.932989877 |
| -0.030633333 | -0.1001      | 0.932968321 |
| -0.026866667 | -0.100155556 | 0.932932395 |
| -0.620033333 | -0.100211111 | 0.93289647  |
| -0.100366667 | -0.100244444 | 0.932874916 |
| -0.0835      | -0.100366667 | 0.932795888 |
| -0.021866667 | -0.1005      | 0.932709683 |
| -0.612833333 | -0.100511111 | 0.9327025   |
| -0.1272      | -0.100533333 | 0.932688133 |
| -0.0437      | -0.100544444 | 0.93268095  |
| -0.098266667 | -0.100544444 | 0.93268095  |
| -0.179966667 | -0.100633333 | 0.932623486 |
| -0.0577      | -0.100711111 | 0.932573209 |
| -0.101766667 | -0.100722222 | 0.932566026 |
| 0.016966667  | -0.100733333 | 0.932558844 |
| -0.122633333 | -0.100733333 | 0.932558844 |
| 0.0439       | -0.100788889 | 0.932522934 |
| -0.036866667 | -0.100788889 | 0.932522934 |
| -0.1319      | -0.100855556 | 0.932479843 |
| 0.066866667  | -0.100888889 | 0.932458298 |
| 0.196766667  | -0.100911111 | 0.932443935 |
| -0.0648      | -0.100955556 | 0.93241521  |
| 0.0344       | -0.101011111 | 0.932379306 |
| -0.2097      | -0.101022222 | 0.932372125 |
| -0.454566667 | -0.1011      | 0.932321861 |
| -0.267933333 | -0.101133333 | 0.93230032  |
| 0.0326       | -0.101133333 | 0.93230032  |
| -0.019433333 | -0.101211111 | 0.932250059 |
| -0.093666667 | -0.101211111 | 0.932250059 |
| -0.0535      | -0.101233333 | 0.9322357   |
| 0.020166667  | -0.1013      | 0.932192622 |
| -0.0361      | -0.101344444 | 0.932163905 |
| 0.032433333  | -0.1014      | 0.93212801  |
| -0.386266667 | -0.101511111 | 0.932056224 |

|              |              |             |
|--------------|--------------|-------------|
| 0.022533333  | -0.101622222 | 0.931984443 |
| 0.1537       | -0.101688889 | 0.931941377 |
| -0.0046      | -0.1017      | 0.931934199 |
| -0.079866667 | -0.101711111 | 0.931927022 |
| -0.309533333 | -0.101722222 | 0.931919845 |
| -0.030133333 | -0.101911111 | 0.931797838 |
| 0.3918       | -0.101955556 | 0.931769133 |
| -0.158866667 | -0.101988889 | 0.931747605 |
| -0.1327      | -0.102011111 | 0.931733253 |
| -0.092666667 | -0.102177778 | 0.931625622 |
| -0.1016      | -0.102211111 | 0.931604097 |
| 0.145        | -0.102222222 | 0.931596922 |
| -0.044733333 | -0.102244444 | 0.931582572 |
| -0.0928      | -0.102266667 | 0.931568223 |
| -0.1362      | -0.102277778 | 0.931561048 |
| -0.012466667 | -0.102355556 | 0.931510828 |
| -0.045766667 | -0.102377778 | 0.93149648  |
| 0.145666667  | -0.102422222 | 0.931467784 |
| -0.1138      | -0.102488889 | 0.931424742 |
| -0.0119      | -0.102544444 | 0.931388875 |
| 0.043933333  | -0.1026      | 0.93135301  |
| -0.012766667 | -0.102666667 | 0.931309973 |
| -0.276533333 | -0.1027      | 0.931288456 |
| -0.067466667 | -0.102711111 | 0.931281283 |
| -0.2788      | -0.102722222 | 0.931274111 |
| -0.090666667 | -0.102744444 | 0.931259766 |
| -0.008833333 | -0.102811111 | 0.931216734 |
| -0.096133333 | -0.102888889 | 0.931166532 |
| -0.197633333 | -0.102955556 | 0.931123504 |
| -0.083933333 | -0.102966667 | 0.931116333 |
| -0.010433333 | -0.103       | 0.93109482  |
| -0.070633333 | -0.103011111 | 0.931087649 |
| -0.152566667 | -0.103055556 | 0.931058966 |
| -0.035433333 | -0.103122222 | 0.931015943 |
| -0.018066667 | -0.103166667 | 0.930987262 |
| 0.019833333  | -0.103233333 | 0.930944242 |
| 0.0029       | -0.103311111 | 0.930894055 |
| -0.077933333 | -0.103377778 | 0.930851039 |
| -0.024766667 | -0.103444444 | 0.930808026 |
| -0.034133333 | -0.103588889 | 0.930714837 |
| -0.1883      | -0.103622222 | 0.930693333 |
| -0.022766667 | -0.103633333 | 0.930686165 |
| -0.102233333 | -0.103711111 | 0.930635992 |
| -0.2394      | -0.103722222 | 0.930628825 |
| -0.033766667 | -0.103855556 | 0.93054282  |
| -0.076666667 | -0.103944444 | 0.930485488 |
| -0.122533333 | -0.103955556 | 0.930478322 |

|              |              |             |
|--------------|--------------|-------------|
| -0.082033333 | -0.103988889 | 0.930456824 |
| -0.242833333 | -0.103988889 | 0.930456824 |
| -0.104366667 | -0.104033333 | 0.93042816  |
| -0.020333333 | -0.104077778 | 0.930399497 |
| -0.107       | -0.104155556 | 0.930349339 |
| -0.187966667 | -0.104211111 | 0.930313514 |
| -0.096666667 | -0.104288889 | 0.930263361 |
| -0.205366667 | -0.1043      | 0.930256196 |
| 0.2042       | -0.104311111 | 0.930249032 |
| -0.0551      | -0.104355556 | 0.930220374 |
| 0.0149       | -0.104433333 | 0.930170226 |
| 0.0227       | -0.104488889 | 0.930134408 |
| -0.147933333 | -0.104544444 | 0.930098591 |
| -0.018166667 | -0.104555556 | 0.930091427 |
| 0.140066667  | -0.104566667 | 0.930084264 |
| -0.064033333 | -0.1046      | 0.930062775 |
| -0.036733333 | -0.104677778 | 0.930012635 |
| -0.045166667 | -0.104744444 | 0.929969661 |
| 0.102833333  | -0.104766667 | 0.929955336 |
| -0.189366667 | -0.104888889 | 0.929876556 |
| 0.2643       | -0.104888889 | 0.929876556 |
| -0.754933333 | -0.1049      | 0.929869394 |
| -0.132233333 | -0.104933333 | 0.92984791  |
| 0.052566667  | -0.104944444 | 0.929840748 |
| -0.1894      | -0.104955556 | 0.929833587 |
| -0.1502      | -0.104955556 | 0.929833587 |
| -0.0573      | -0.104977778 | 0.929819265 |
| -0.0121      | -0.104988889 | 0.929812104 |
| -0.228933333 | -0.105       | 0.929804943 |
| -0.121       | -0.105044444 | 0.929776299 |
| 0.059833333  | -0.105122222 | 0.929726175 |
| -0.0628      | -0.105188889 | 0.929683213 |
| -0.1171      | -0.105277778 | 0.929625934 |
| -0.1609      | -0.1053      | 0.929611615 |
| -0.535266667 | -0.105311111 | 0.929604456 |
| 0.163033333  | -0.105311111 | 0.929604456 |
| 0.003366667  | -0.105377778 | 0.9295615   |
| 0.009433333  | -0.105388889 | 0.929554341 |
| -0.050966667 | -0.105388889 | 0.929554341 |
| -0.173366667 | -0.105388889 | 0.929554341 |
| -0.040366667 | -0.105411111 | 0.929540023 |
| -0.016366667 | -0.105477778 | 0.92949707  |
| -0.0293      | -0.1055      | 0.929482753 |
| -0.0569      | -0.105533333 | 0.929461277 |
| -0.0373      | -0.105555556 | 0.929446961 |
| 0.009566667  | -0.105588889 | 0.929425486 |
| -0.5348      | -0.1056      | 0.929418328 |

|              |              |             |
|--------------|--------------|-------------|
| 0.054066667  | -0.105611111 | 0.92941117  |
| -0.1239      | -0.105633333 | 0.929396854 |
| -0.113766667 | -0.105711111 | 0.92934675  |
| -0.021566667 | -0.105733333 | 0.929332435 |
| 0.008266667  | -0.1058      | 0.929289492 |
| 0.000666667  | -0.105822222 | 0.929275178 |
| -0.0099      | -0.105844444 | 0.929260864 |
| 0.018666667  | -0.105855556 | 0.929253708 |
| -0.123933333 | -0.105922222 | 0.929210768 |
| 0.2118       | -0.106       | 0.929160674 |
| -0.113066667 | -0.106111111 | 0.929089116 |
| -0.053533333 | -0.106122222 | 0.929081961 |
| -0.436033333 | -0.106166667 | 0.92905334  |
| -0.1277      | -0.106211111 | 0.929024719 |
| 0.485566667  | -0.106233333 | 0.929010409 |
| -0.100533333 | -0.106244444 | 0.929003254 |
| -0.0408      | -0.106277778 | 0.92898179  |
| 0.108333333  | -0.106277778 | 0.92898179  |
| -0.1635      | -0.1063      | 0.928967481 |
| -0.093066667 | -0.106411111 | 0.928895938 |
| -0.011533333 | -0.106433333 | 0.92888163  |
| 0.098233333  | -0.106433333 | 0.92888163  |
| -0.001966667 | -0.106455556 | 0.928867322 |
| -0.032333333 | -0.106511111 | 0.928831554 |
| -0.0804      | -0.106533333 | 0.928817247 |
| -0.128566667 | -0.106555556 | 0.92880294  |
| 0.0118       | -0.106611111 | 0.928767174 |
| -0.635233333 | -0.106777778 | 0.928659885 |
| -0.1966      | -0.1068      | 0.928645581 |
| -0.0832      | -0.106855556 | 0.928609821 |
| 0.060633333  | -0.106911111 | 0.928574063 |
| -0.274133333 | -0.106933333 | 0.92855976  |
| 0.062566667  | -0.106933333 | 0.92855976  |
| -0.096366667 | -0.107044444 | 0.928488248 |
| -0.069233333 | -0.107066667 | 0.928473947 |
| 0.265466667  | -0.107088889 | 0.928459645 |
| 0.001        | -0.107111111 | 0.928445344 |
| 0.1279       | -0.107111111 | 0.928445344 |
| -0.048633333 | -0.107133333 | 0.928431043 |
| 1.00E-04     | -0.107144444 | 0.928423893 |
| -0.014266667 | -0.107155556 | 0.928416742 |
| -0.031766667 | -0.107222222 | 0.928373841 |
| -0.094133333 | -0.107288889 | 0.928330942 |
| -0.191333333 | -0.107344444 | 0.928295195 |
| -0.260866667 | -0.107377778 | 0.928273747 |
| -0.1526      | -0.107466667 | 0.928216555 |
| -0.017866667 | -0.107511111 | 0.92818796  |

|              |              |             |
|--------------|--------------|-------------|
| -0.055666667 | -0.107522222 | 0.928180812 |
| -0.2003      | -0.107555556 | 0.928159366 |
| -0.121833333 | -0.107555556 | 0.928159366 |
| -0.1254      | -0.107588889 | 0.928137921 |
| -0.1875      | -0.1076      | 0.928130773 |
| -0.063833333 | -0.107633333 | 0.928109329 |
| -0.186166667 | -0.107666667 | 0.928087886 |
| -0.2021      | -0.1077      | 0.928066442 |
| 0.031133333  | -0.107766667 | 0.928023558 |
| 0.052766667  | -0.1078      | 0.928002116 |
| 0.0073       | -0.107822222 | 0.927987822 |
| -0.0123      | -0.107822222 | 0.927987822 |
| -0.004433333 | -0.107877778 | 0.927952087 |
| 0.1188       | -0.107877778 | 0.927952087 |
| -0.144666667 | -0.107944444 | 0.927909208 |
| -0.106766667 | -0.107988889 | 0.927880623 |
| -0.1325      | -0.1082      | 0.927744855 |
| -0.019766667 | -0.1082      | 0.927744855 |
| 0.092966667  | -0.108211111 | 0.92773771  |
| -0.154966667 | -0.108222222 | 0.927730565 |
| -0.1137      | -0.108422222 | 0.927601963 |
| -0.022633333 | -0.108422222 | 0.927601963 |
| 0.0438       | -0.108466667 | 0.927573387 |
| -0.0877      | -0.108488889 | 0.927559099 |
| 0.219033333  | -0.108488889 | 0.927559099 |
| -0.040933333 | -0.1086      | 0.927487665 |
| 0.011233333  | -0.108655556 | 0.92745195  |
| -0.016433333 | -0.108677778 | 0.927437664 |
| 0.0165       | -0.108866667 | 0.927316245 |
| 0.060666667  | -0.108988889 | 0.927237688 |
| 0.4305       | -0.108988889 | 0.927237688 |
| -0.052966667 | -0.109066667 | 0.9271877   |
| -0.007566667 | -0.109133333 | 0.927144856 |
| -0.138733333 | -0.109155556 | 0.927130575 |
| -0.0649      | -0.109155556 | 0.927130575 |
| -0.080733333 | -0.109277778 | 0.927052034 |
| -0.0366      | -0.109311111 | 0.927030615 |
| -0.010066667 | -0.109311111 | 0.927030615 |
| -0.159166667 | -0.109466667 | 0.926930665 |
| -0.0933      | -0.109633333 | 0.926823588 |
| -0.1658      | -0.109644444 | 0.92681645  |
| -0.1191      | -0.109688889 | 0.926787898 |
| -0.035866667 | -0.109744444 | 0.92675221  |
| 0.0058       | -0.109755556 | 0.926745073 |
| -0.033       | -0.109777778 | 0.926730798 |
| -0.057466667 | -0.109877778 | 0.926666564 |
| 0.2566       | -0.110177778 | 0.926473889 |

|              |              |             |
|--------------|--------------|-------------|
| -0.012466667 | -0.110211111 | 0.926452483 |
| -0.105333333 | -0.110266667 | 0.926416808 |
| -0.139633333 | -0.110311111 | 0.926388269 |
| -0.0717      | -0.110322222 | 0.926381134 |
| -0.1239      | -0.110388889 | 0.926338327 |
| 0.069433333  | -0.1104      | 0.926331193 |
| -0.133633333 | -0.1104      | 0.926331193 |
| -0.088733333 | -0.110444444 | 0.926302656 |
| -0.075266667 | -0.110655556 | 0.926167119 |
| 0.088533333  | -0.110688889 | 0.92614572  |
| -0.005766667 | -0.1107      | 0.926138588 |
| 0.0429       | -0.110777778 | 0.926088659 |
| -0.185633333 | -0.110822222 | 0.92606013  |
| 0.027166667  | -0.110822222 | 0.92606013  |
| -0.079733333 | -0.110855556 | 0.926038734 |
| -0.067533333 | -0.110911111 | 0.926003075 |
| -0.062566667 | -0.110922222 | 0.925995943 |
| 0.1152       | -0.110922222 | 0.925995943 |
| 0.023333333  | -0.110977778 | 0.925960285 |
| 0.164766667  | -0.110988889 | 0.925953154 |
| -0.057266667 | -0.111022222 | 0.92593176  |
| 0.031333333  | -0.111044444 | 0.925917498 |
| 0.076433333  | -0.1111      | 0.925881843 |
| 0.014833333  | -0.111122222 | 0.925867582 |
| 0.068666667  | -0.111155556 | 0.92584619  |
| -0.217066667 | -0.111166667 | 0.925839059 |
| 0.046366667  | -0.111222222 | 0.925803408 |
| -0.270766667 | -0.1113      | 0.925753497 |
| 0.111833333  | -0.111333333 | 0.925732108 |
| 0.316133333  | -0.111355556 | 0.925717849 |
| -0.030466667 | -0.111422222 | 0.925675073 |
| 0.057966667  | -0.111455556 | 0.925653685 |
| -0.022233333 | -0.111466667 | 0.925646556 |
| 0.0422       | -0.111488889 | 0.925632299 |
| 0.072466667  | -0.111644444 | 0.9255325   |
| -0.098466667 | -0.111744444 | 0.925468349 |
| -0.022233333 | -0.1118      | 0.925432711 |
| -0.0985      | -0.111866667 | 0.925389948 |
| -0.1536      | -0.111922222 | 0.925354314 |
| -0.0277      | -0.112022222 | 0.925290175 |
| -0.2216      | -0.112044444 | 0.925275923 |
| 0.048        | -0.112088889 | 0.925247419 |
| -0.1007      | -0.112155556 | 0.925204664 |
| -0.034333333 | -0.1122      | 0.925176162 |
| 0.018633333  | -0.1124      | 0.925047915 |
| -0.128433333 | -0.112411111 | 0.92504079  |
| 0.0189       | -0.112444444 | 0.925019418 |

|              |              |             |
|--------------|--------------|-------------|
| 0.055033333  | -0.112466667 | 0.925005169 |
| 0.029733333  | -0.112522222 | 0.92496955  |
| -0.0168      | -0.112577778 | 0.924933932 |
| 0.079366667  | -0.112611111 | 0.924912561 |
| -0.069233333 | -0.1127      | 0.924855576 |
| -0.135766667 | -0.112944444 | 0.924698886 |
| -0.121766667 | -0.112944444 | 0.924698886 |
| -0.045433333 | -0.112955556 | 0.924691764 |
| -0.220166667 | -0.113       | 0.924663278 |
| -0.246633333 | -0.113011111 | 0.924656157 |
| 0.049633333  | -0.113133333 | 0.924577825 |
| -0.075166667 | -0.113155556 | 0.924563584 |
| -0.178233333 | -0.113166667 | 0.924556463 |
| -0.1505      | -0.113366667 | 0.924428301 |
| -0.1618      | -0.113366667 | 0.924428301 |
| -0.076633333 | -0.113477778 | 0.924357108 |
| 0.0183       | -0.113522222 | 0.924328632 |
| -0.068066667 | -0.113555556 | 0.924307276 |
| 0.099166667  | -0.113622222 | 0.924264565 |
| 0.020666667  | -0.113677778 | 0.924228974 |
| -0.112166667 | -0.113733333 | 0.924193384 |
| -0.1238      | -0.113744444 | 0.924186266 |
| 0.192133333  | -0.113755556 | 0.924179148 |
| -0.0501      | -0.113766667 | 0.924172031 |
| -0.0681      | -0.113811111 | 0.924143561 |
| -0.015933333 | -0.113822222 | 0.924136443 |
| -0.1092      | -0.113877778 | 0.924100857 |
| -0.145433333 | -0.113888889 | 0.92409374  |
| -0.045366667 | -0.1139      | 0.924086623 |
| 0.162933333  | -0.113922222 | 0.924072389 |
| 0.0268       | -0.114044444 | 0.923994107 |
| -0.204633333 | -0.114066667 | 0.923979875 |
| 0.0459       | -0.1142      | 0.923894485 |
| -0.139766667 | -0.114255556 | 0.923858908 |
| -0.170066667 | -0.114388889 | 0.923773529 |
| -0.1635      | -0.114411111 | 0.9237593   |
| 0.029266667  | -0.114555556 | 0.923666817 |
| -0.022633333 | -0.114666667 | 0.923595682 |
| -0.112533333 | -0.114677778 | 0.923588569 |
| -0.0952      | -0.114755556 | 0.923538778 |
| 0.1166       | -0.114755556 | 0.923538778 |
| -0.135433333 | -0.114766667 | 0.923531665 |
| -0.139033333 | -0.114777778 | 0.923524553 |
| -0.1598      | -0.1148      | 0.923510328 |
| -0.203633333 | -0.114844444 | 0.923481878 |
| -0.0622      | -0.114844444 | 0.923481878 |
| -0.0673      | -0.114877778 | 0.923460541 |



|              |              |             |
|--------------|--------------|-------------|
| -0.281366667 | -0.114933333 | 0.923424981 |
| -0.113333333 | -0.114955556 | 0.923410757 |
| -0.004366667 | -0.115011111 | 0.923375199 |
| -0.193433333 | -0.115077778 | 0.923332531 |
| -0.297666667 | -0.1151      | 0.923318309 |
| 0.059233333  | -0.115111111 | 0.923311198 |
| -0.1239      | -0.115211111 | 0.923247201 |
| 0.007033333  | -0.115233333 | 0.92323298  |
| -0.159533333 | -0.115255556 | 0.923218759 |
| -0.203533333 | -0.115311111 | 0.923183209 |
| 0.0302       | -0.115355556 | 0.923154769 |
| 0.111833333  | -0.115366667 | 0.923147659 |
| -0.010766667 | -0.115422222 | 0.923112111 |
| 0.024366667  | -0.115433333 | 0.923105002 |
| -0.1283      | -0.115466667 | 0.923083674 |
| 0.071966667  | -0.115588889 | 0.923005475 |
| -0.105633333 | -0.1156      | 0.922998367 |
| -0.164666667 | -0.115644444 | 0.922969933 |
| -0.178133333 | -0.115666667 | 0.922955716 |
| -0.0451      | -0.115666667 | 0.922955716 |
| -0.2535      | -0.115688889 | 0.9229415   |
| -0.197033333 | -0.115711111 | 0.922927283 |
| 0.108766667  | -0.115711111 | 0.922927283 |
| -0.0078      | -0.115733333 | 0.922913067 |
| -0.152266667 | -0.115777778 | 0.922884636 |
| -0.079733333 | -0.115844444 | 0.922841991 |
| 0.012433333  | -0.115933333 | 0.922785133 |
| -0.220533333 | -0.115955556 | 0.92277092  |
| -0.205       | -0.115955556 | 0.92277092  |
| 0.101166667  | -0.115966667 | 0.922763813 |
| -0.107733333 | -0.116022222 | 0.92272828  |
| -0.104466667 | -0.116022222 | 0.92272828  |
| -0.054566667 | -0.1162      | 0.922614582 |
| -0.116566667 | -0.116244444 | 0.92258616  |
| -0.050933333 | -0.116333333 | 0.922529318 |
| -0.105133333 | -0.116344444 | 0.922522214 |
| -0.151       | -0.116355556 | 0.922515109 |
| -0.0088      | -0.116433333 | 0.922465376 |
| 0.1746       | -0.116466667 | 0.922444063 |
| -0.0192      | -0.116477778 | 0.922436958 |
| -0.413533333 | -0.1165      | 0.92242275  |
| -0.11        | -0.116511111 | 0.922415646 |
| -0.123766667 | -0.116511111 | 0.922415646 |
| 0.022533333  | -0.116533333 | 0.922401438 |
| -0.166833333 | -0.116555556 | 0.92238723  |
| 0.026866667  | -0.116555556 | 0.92238723  |
| -0.053966667 | -0.116644444 | 0.9223304   |

|              |              |             |
|--------------|--------------|-------------|
| -0.0785      | -0.1168      | 0.922230957 |
| -0.2325      | -0.116833333 | 0.92220965  |
| -0.2794      | -0.116922222 | 0.922152831 |
| -0.076333333 | -0.116944444 | 0.922138627 |
| -0.260833333 | -0.116955556 | 0.922131525 |
| -0.013166667 | -0.116966667 | 0.922124423 |
| 0.045533333  | -0.116988889 | 0.92211022  |
| -0.381       | -0.117066667 | 0.922060509 |
| -0.120866667 | -0.117066667 | 0.922060509 |
| -0.006966667 | -0.117133333 | 0.922017901 |
| 0.090433333  | -0.117166667 | 0.921996599 |
| -0.048266667 | -0.117233333 | 0.921953994 |
| -0.186933333 | -0.117233333 | 0.921953994 |
| -0.029466667 | -0.117266667 | 0.921932693 |
| -0.205233333 | -0.117322222 | 0.921897192 |
| -0.0368      | -0.117366667 | 0.921868792 |
| -0.021066667 | -0.117377778 | 0.921861692 |
| -0.457633333 | -0.1175      | 0.921783597 |
| -0.017366667 | -0.117511111 | 0.921776497 |
| 0.020533333  | -0.117522222 | 0.921769398 |
| -0.205033333 | -0.117577778 | 0.921733903 |
| -0.005433333 | -0.117577778 | 0.921733903 |
| -0.028233333 | -0.1176      | 0.921719706 |
| -0.112733333 | -0.117755556 | 0.921620329 |
| -0.104866667 | -0.117822222 | 0.921577742 |
| 0.0378       | -0.117833333 | 0.921570644 |
| 0.108466667  | -0.117855556 | 0.921556449 |
| -0.208166667 | -0.117922222 | 0.921513865 |
| -0.109533333 | -0.117966667 | 0.921485477 |
| 0.0607       | -0.118033333 | 0.921442896 |
| -0.0257      | -0.1181      | 0.921400317 |
| -0.0759      | -0.118366667 | 0.921230022 |
| 0.232433333  | -0.118433333 | 0.921187453 |
| 0.0361       | -0.118488889 | 0.921151981 |
| -0.0882      | -0.118544444 | 0.92111651  |
| -0.113133333 | -0.118622222 | 0.921066852 |
| -0.044266667 | -0.118666667 | 0.921038478 |
| -0.1293      | -0.118677778 | 0.921031384 |
| -0.152566667 | -0.118711111 | 0.921010104 |
| -0.074833333 | -0.118766667 | 0.920974638 |
| 0.015166667  | -0.1188      | 0.92095336  |
| -0.2105      | -0.118866667 | 0.920910804 |
| -0.193233333 | -0.118933333 | 0.920868249 |
| -0.056433333 | -0.118955556 | 0.920854065 |
| 0.131066667  | -0.118988889 | 0.920832789 |
| -0.019633333 | -0.119       | 0.920825697 |
| -0.019966667 | -0.119011111 | 0.920818605 |

|              |              |             |
|--------------|--------------|-------------|
| -0.2365      | -0.119055556 | 0.920790239 |
| -0.289166667 | -0.1191      | 0.920761873 |
| -0.0935      | -0.119122222 | 0.92074769  |
| -0.0452      | -0.119122222 | 0.92074769  |
| -0.173933333 | -0.119122222 | 0.92074769  |
| 0.012366667  | -0.119155556 | 0.920726416 |
| 0.017533333  | -0.119177778 | 0.920712234 |
| 0.027766667  | -0.119288889 | 0.920641327 |
| 0.208033333  | -0.119366667 | 0.920591695 |
| -0.007466667 | -0.1194      | 0.920570426 |
| -0.039866667 | -0.1194      | 0.920570426 |
| -0.046733333 | -0.119455556 | 0.920534977 |
| -0.2225      | -0.119477778 | 0.920520798 |
| -0.130133333 | -0.119533333 | 0.920485351 |
| -0.022066667 | -0.119611111 | 0.920435727 |
| -0.057366667 | -0.119611111 | 0.920435727 |
| -0.104566667 | -0.119666667 | 0.920400284 |
| -0.0154      | -0.119833333 | 0.920293961 |
| -0.154366667 | -0.119855556 | 0.920279786 |
| 0.033566667  | -0.119888889 | 0.920258523 |
| 0.018933333  | -0.119911111 | 0.920244348 |
| -0.162933333 | -0.119922222 | 0.920237261 |
| 0.1169       | -0.119933333 | 0.920230173 |
| 0.101633333  | -0.12        | 0.920187651 |
| 0.036766667  | -0.120022222 | 0.920173477 |
| -0.148866667 | -0.120022222 | 0.920173477 |
| -0.170966667 | -0.120022222 | 0.920173477 |
| -0.2052      | -0.120022222 | 0.920173477 |
| -0.053       | -0.120088889 | 0.920130957 |
| -0.075866667 | -0.120122222 | 0.920109697 |
| 0.1094       | -0.120155556 | 0.920088439 |
| -0.0859      | -0.120166667 | 0.920081353 |
| -0.154266667 | -0.1202      | 0.920060094 |
| -0.089366667 | -0.120211111 | 0.920053008 |
| -0.0943      | -0.120255556 | 0.920024665 |
| -0.424       | -0.120266667 | 0.92001758  |
| -0.0797      | -0.120288889 | 0.920003408 |
| -0.0874      | -0.120322222 | 0.919982152 |
| 0.0534       | -0.120355556 | 0.919960896 |
| 0.0646       | -0.120477778 | 0.919882962 |
| -0.013833333 | -0.120511111 | 0.919861709 |
| -0.0343      | -0.120511111 | 0.919861709 |
| -0.054833333 | -0.120577778 | 0.919819203 |
| -0.065133333 | -0.120622222 | 0.919790867 |
| -0.078366667 | -0.120688889 | 0.919748365 |
| -0.159266667 | -0.120722222 | 0.919727114 |
| -0.178566667 | -0.120766667 | 0.919698781 |

|              |              |             |
|--------------|--------------|-------------|
| -0.2524      | -0.120877778 | 0.919627952 |
| -0.029433333 | -0.120922222 | 0.919599622 |
| -0.220333333 | -0.121055556 | 0.919514637 |
| 0.147866667  | -0.121155556 | 0.919450903 |
| 0.084366667  | -0.121233333 | 0.919401335 |
| -0.243566667 | -0.121233333 | 0.919401335 |
| 0.0916       | -0.121288889 | 0.919365932 |
| -0.0593      | -0.121288889 | 0.919365932 |
| -0.099166667 | -0.121344444 | 0.919330529 |
| -0.0179      | -0.121422222 | 0.919280968 |
| 0.0166       | -0.121422222 | 0.919280968 |
| -0.180933333 | -0.121422222 | 0.919280968 |
| 0.083766667  | -0.121588889 | 0.919174775 |
| -0.1579      | -0.121622222 | 0.919153537 |
| 0.087166667  | -0.121644444 | 0.91913938  |
| -0.1898      | -0.121811111 | 0.919033203 |
| -0.061233333 | -0.121844444 | 0.919011969 |
| -0.154433333 | -0.121855556 | 0.919004891 |
| -0.065333333 | -0.121911111 | 0.918969502 |
| -0.140633333 | -0.122011111 | 0.918905806 |
| 0.165733333  | -0.122033333 | 0.918891652 |
| 0.177966667  | -0.122111111 | 0.918842115 |
| -0.034466667 | -0.122155556 | 0.918813809 |
| -0.217233333 | -0.122188889 | 0.91879258  |
| -0.0163      | -0.122188889 | 0.91879258  |
| 0.0006       | -0.122188889 | 0.91879258  |
| 0.086633333  | -0.1222      | 0.918785504 |
| -0.088366667 | -0.122211111 | 0.918778428 |
| -0.398066667 | -0.122333333 | 0.918700594 |
| -0.078533333 | -0.122411111 | 0.918651067 |
| -0.059866667 | -0.122433333 | 0.918636917 |
| 0.052666667  | -0.122455556 | 0.918622767 |
| -0.1903      | -0.122466667 | 0.918615692 |
| 0.030233333  | -0.122477778 | 0.918608617 |
| -0.055566667 | -0.122488889 | 0.918601542 |
| -0.119533333 | -0.122522222 | 0.918580318 |
| -0.1978      | -0.1228      | 0.918403471 |
| -0.0054      | -0.1228      | 0.918403471 |
| -0.057433333 | -0.122811111 | 0.918396398 |
| -0.013433333 | -0.122822222 | 0.918389325 |
| -0.047566667 | -0.123055556 | 0.918240802 |
| -0.098333333 | -0.123055556 | 0.918240802 |
| -0.012433333 | -0.123077778 | 0.918226658 |
| -0.0246      | -0.123111111 | 0.918205443 |
| 0.000266667  | -0.123244444 | 0.918120586 |
| -0.0764      | -0.123244444 | 0.918120586 |
| -0.2329      | -0.123311111 | 0.918078161 |

|              |              |             |
|--------------|--------------|-------------|
| -0.187966667 | -0.1234      | 0.918021597 |
| 0.009866667  | -0.123433333 | 0.918000387 |
| -0.043533333 | -0.123444444 | 0.917993317 |
| -0.089233333 | -0.123466667 | 0.917979177 |
| 0.055433333  | -0.123533333 | 0.917936758 |
| -0.1266      | -0.123588889 | 0.917901411 |
| -0.345966667 | -0.123677778 | 0.917844858 |
| 0.065466667  | -0.123688889 | 0.917837789 |
| -0.0756      | -0.1237      | 0.91783072  |
| -0.256666667 | -0.123811111 | 0.917760035 |
| -0.5405      | -0.123844444 | 0.91773883  |
| 0.070533333  | -0.123988889 | 0.91764695  |
| -0.066033333 | -0.124044444 | 0.917611613 |
| -0.200166667 | -0.124122222 | 0.917562145 |
| -0.0399      | -0.124122222 | 0.917562145 |
| -0.3814      | -0.124133333 | 0.917555078 |
| -0.044633333 | -0.124133333 | 0.917555078 |
| 0.0116       | -0.124177778 | 0.917526812 |
| -0.075866667 | -0.124222222 | 0.917498547 |
| -0.091833333 | -0.124277778 | 0.917463216 |
| 0.006666667  | -0.124411111 | 0.917378428 |
| -0.041966667 | -0.124444444 | 0.917357233 |
| -0.197933333 | -0.124466667 | 0.917343103 |
| 0.0143       | -0.124555556 | 0.917286584 |
| 0.0314       | -0.124566667 | 0.917279519 |
| -0.070366667 | -0.124611111 | 0.917251262 |
| 0.103833333  | -0.124666667 | 0.917215941 |
| 0.032366667  | -0.1247      | 0.917194749 |
| 0.0131       | -0.124722222 | 0.917180621 |
| 0.114966667  | -0.124733333 | 0.917173557 |
| -0.103166667 | -0.124766667 | 0.917152366 |
| -0.076133333 | -0.124833333 | 0.917109986 |
| 0.0184       | -0.124855556 | 0.917095859 |
| -0.027933333 | -0.124933333 | 0.917046419 |
| -0.3154      | -0.125011111 | 0.916996981 |
| 0.029966667  | -0.125122222 | 0.91692636  |
| -0.1912      | -0.125166667 | 0.916898113 |
| -0.3221      | -0.125266667 | 0.916834561 |
| -0.0223      | -0.1254      | 0.916749831 |
| 0.010733333  | -0.125411111 | 0.91674277  |
| -0.0707      | -0.125577778 | 0.91663687  |
| -0.159333333 | -0.125655556 | 0.916587454 |
| -0.3949      | -0.125688889 | 0.916566277 |
| -0.106166667 | -0.125822222 | 0.916481572 |
| -0.0144      | -0.125866667 | 0.916453339 |
| 0.3336       | -0.125888889 | 0.916439223 |
| 0.059066667  | -0.126       | 0.916368645 |

|              |              |             |
|--------------|--------------|-------------|
| -0.095066667 | -0.126088889 | 0.916312186 |
| -0.250733333 | -0.126133333 | 0.916283958 |
| -0.282633333 | -0.126133333 | 0.916283958 |
| 0.3203       | -0.126144444 | 0.916276901 |
| -0.8398      | -0.126144444 | 0.916276901 |
| -0.034433333 | -0.1262      | 0.916241618 |
| -0.1518      | -0.126211111 | 0.916234561 |
| -0.4593      | -0.126255556 | 0.916206336 |
| -0.015933333 | -0.126288889 | 0.916185167 |
| -0.012366667 | -0.1263      | 0.916178111 |
| -0.001633333 | -0.126333333 | 0.916156943 |
| -0.156733333 | -0.126355556 | 0.916142831 |
| -0.029766667 | -0.126366667 | 0.916135776 |
| -0.184266667 | -0.126488889 | 0.916058166 |
| -0.064633333 | -0.126544444 | 0.916022891 |
| -0.008533333 | -0.126588889 | 0.915994672 |
| 0.0406       | -0.126611111 | 0.915980562 |
| -0.0718      | -0.126644444 | 0.915959399 |
| -0.030766667 | -0.126644444 | 0.915959399 |
| -0.201033333 | -0.126666667 | 0.91594529  |
| -0.406966667 | -0.126788889 | 0.915867697 |
| -0.118       | -0.126833333 | 0.915839482 |
| -0.300633333 | -0.126855556 | 0.915825375 |
| -0.1326      | -0.1269      | 0.915797162 |
| 0.0015       | -0.126911111 | 0.915790109 |
| -0.1844      | -0.126933333 | 0.915776003 |
| -0.14        | -0.1271      | 0.915670215 |
| -0.047833333 | -0.127122222 | 0.915656111 |
| 0.139433333  | -0.127144444 | 0.915642007 |
| -0.037       | -0.127166667 | 0.915627903 |
| 0.023866667  | -0.127255556 | 0.91557149  |
| -0.078933333 | -0.127422222 | 0.915465725 |
| 0.135066667  | -0.1275      | 0.915416372 |
| 0.070033333  | -0.127511111 | 0.915409322 |
| 0.045966667  | -0.127666667 | 0.915310625 |
| 0.007166667  | -0.127666667 | 0.915310625 |
| -0.325933333 | -0.127766667 | 0.915247183 |
| -0.0481      | -0.127977778 | 0.915113264 |
| -0.1726      | -0.128011111 | 0.91509212  |
| -0.425466667 | -0.128111111 | 0.915028693 |
| -0.0208      | -0.128133333 | 0.915014599 |
| -0.096433333 | -0.128188889 | 0.914979364 |
| -0.1042      | -0.128255556 | 0.914937084 |
| 0.012466667  | -0.128266667 | 0.914930038 |
| 0.097066667  | -0.128322222 | 0.914894806 |
| -0.221933333 | -0.128366667 | 0.914866622 |
| 0.024666667  | -0.128377778 | 0.914859576 |

|              |              |             |
|--------------|--------------|-------------|
| -0.118566667 | -0.128411111 | 0.914838438 |
| 0.035866667  | -0.128455556 | 0.914810256 |
| 0.017166667  | -0.128477778 | 0.914796165 |
| 0.1244       | -0.128555556 | 0.914746848 |
| -0.182333333 | -0.128566667 | 0.914739803 |
| -0.0982      | -0.128611111 | 0.914711623 |
| -0.125833333 | -0.128677778 | 0.914669356 |
| -0.0337      | -0.128688889 | 0.914662311 |
| -0.191933333 | -0.128722222 | 0.914641178 |
| -0.0845      | -0.128777778 | 0.914605958 |
| -0.083933333 | -0.128844444 | 0.914563695 |
| -0.019066667 | -0.128955556 | 0.914493261 |
| 0.121833333  | -0.129044444 | 0.914436918 |
| -0.125033333 | -0.129144444 | 0.914373537 |
| -0.090033333 | -0.129144444 | 0.914373537 |
| 0.052666667  | -0.129188889 | 0.914345368 |
| 0.040433333  | -0.129211111 | 0.914331285 |
| -0.019866667 | -0.129222222 | 0.914324243 |
| -0.0645      | -0.1293      | 0.914274952 |
| 0.069866667  | -0.129433333 | 0.914190459 |
| 0.0572       | -0.1295      | 0.914148215 |
| -0.0059      | -0.129566667 | 0.914105973 |
| -0.019733333 | -0.129666667 | 0.914042615 |
| -0.121066667 | -0.129744444 | 0.913993338 |
| -0.2968      | -0.129755556 | 0.913986299 |
| -0.116633333 | -0.1298      | 0.913958143 |
| -0.085033333 | -0.129866667 | 0.91391591  |
| 0.1932       | -0.129922222 | 0.913880718 |
| -0.054766667 | -0.129944444 | 0.913866641 |
| 0.0096       | -0.129977778 | 0.913845526 |
| -0.641433333 | -0.130055556 | 0.913796261 |
| 0.279433333  | -0.130133333 | 0.913746998 |
| -0.006266667 | -0.130177778 | 0.913718849 |
| -0.057833333 | -0.130233333 | 0.913683664 |
| -0.055133333 | -0.130255556 | 0.913669591 |
| -0.306       | -0.130266667 | 0.913662554 |
| -0.087233333 | -0.130344444 | 0.913613298 |
| -0.0353      | -0.130477778 | 0.913528866 |
| 0.054133333  | -0.130477778 | 0.913528866 |
| 0.134733333  | -0.130555556 | 0.913479618 |
| 0.0807       | -0.130566667 | 0.913472583 |
| -0.039666667 | -0.130588889 | 0.913458513 |
| 0.014966667  | -0.1306      | 0.913451477 |
| -0.108733333 | -0.130711111 | 0.913381129 |
| -0.2063      | -0.130733333 | 0.91336706  |
| -0.023       | -0.130744444 | 0.913360026 |
| 0.102866667  | -0.130811111 | 0.913317821 |

|              |              |             |
|--------------|--------------|-------------|
| -0.002933333 | -0.131       | 0.91319825  |
| 0.0401       | -0.131       | 0.91319825  |
| -0.0936      | -0.131055556 | 0.913163085 |
| -0.012266667 | -0.131066667 | 0.913156052 |
| -0.300666667 | -0.131088889 | 0.913141987 |
| -0.067166667 | -0.1311      | 0.913134954 |
| 0.186166667  | -0.131155556 | 0.913099792 |
| -0.140866667 | -0.131155556 | 0.913099792 |
| -0.1062      | -0.131188889 | 0.913078695 |
| 0.072633333  | -0.131211111 | 0.913064631 |
| 0.110633333  | -0.131444444 | 0.912916969 |
| -0.037466667 | -0.131544444 | 0.912853692 |
| 0.052233333  | -0.131555556 | 0.912846662 |
| 0.028866667  | -0.1316      | 0.912818541 |
| -0.096366667 | -0.131666667 | 0.91277636  |
| 0.093166667  | -0.131744444 | 0.912727153 |
| -0.120133333 | -0.131955556 | 0.912593602 |
| -0.097766667 | -0.131955556 | 0.912593602 |
| -0.144933333 | -0.131977778 | 0.912579545 |
| 0.105566667  | -0.132       | 0.912565489 |
| 0.105133333  | -0.132       | 0.912565489 |
| -0.008566667 | -0.132066667 | 0.91252332  |
| -0.0503      | -0.132088889 | 0.912509264 |
| 0.0977       | -0.1321      | 0.912502237 |
| -0.121266667 | -0.132211111 | 0.912431962 |
| -0.066733333 | -0.132233333 | 0.912417907 |
| 0.063533333  | -0.132355556 | 0.912340612 |
| -0.023366667 | -0.132466667 | 0.91227035  |
| 0.015633333  | -0.132466667 | 0.91227035  |
| -0.0117      | -0.132477778 | 0.912263324 |
| -0.046566667 | -0.132622222 | 0.912171992 |
| -0.1486      | -0.132744444 | 0.912094717 |
| -0.073133333 | -0.132788889 | 0.912066619 |
| 0.463433333  | -0.132844444 | 0.912031498 |
| 0.3123       | -0.132855556 | 0.912024474 |
| -0.166833333 | -0.132955556 | 0.911961259 |
| 0.062666667  | -0.132977778 | 0.911947212 |
| -0.3889      | -0.133       | 0.911933166 |
| -0.2766      | -0.133066667 | 0.911891026 |
| -0.0145      | -0.133088889 | 0.91187698  |
| -0.173633333 | -0.1331      | 0.911869957 |
| -0.1172      | -0.133111111 | 0.911862934 |
| -0.062733333 | -0.133122222 | 0.911855912 |
| -0.068566667 | -0.133188889 | 0.911813776 |
| -0.078166667 | -0.133255556 | 0.911771642 |
| -0.196366667 | -0.133355556 | 0.911708445 |
| -0.094766667 | -0.133566667 | 0.911575044 |



|              |              |             |
|--------------|--------------|-------------|
| -0.145066667 | -0.133577778 | 0.911568023 |
| -0.199233333 | -0.133655556 | 0.91151888  |
| -0.134566667 | -0.133877778 | 0.911378488 |
| -0.069566667 | -0.134044444 | 0.911273207 |
| -0.0397      | -0.134066667 | 0.911259171 |
| -0.059466667 | -0.134066667 | 0.911259171 |
| -0.0078      | -0.134088889 | 0.911245134 |
| 0.104666667  | -0.134144444 | 0.911210045 |
| 0.008066667  | -0.134266667 | 0.911132852 |
| -0.045033333 | -0.1343      | 0.911111801 |
| -0.1621      | -0.134344444 | 0.911083733 |
| -0.082633333 | -0.134355556 | 0.911076716 |
| -0.085266667 | -0.134377778 | 0.911062683 |
| -0.031266667 | -0.134477778 | 0.910999535 |
| 0.120766667  | -0.134622222 | 0.910908329 |
| -0.0501      | -0.134788889 | 0.910803103 |
| -0.199233333 | -0.134877778 | 0.910746987 |
| -0.043066667 | -0.134877778 | 0.910746987 |
| -0.107766667 | -0.135022222 | 0.910655806 |
| -0.107266667 | -0.135077778 | 0.910620739 |
| -0.092966667 | -0.135111111 | 0.9105997   |
| -0.119133333 | -0.135111111 | 0.9105997   |
| -0.067333333 | -0.135144444 | 0.910578661 |
| -0.0563      | -0.135155556 | 0.910571648 |
| 0.145033333  | -0.135177778 | 0.910557622 |
| 0.010633333  | -0.135211111 | 0.910536584 |
| -0.232866667 | -0.135255556 | 0.910508534 |
| 0.050166667  | -0.135333333 | 0.910459448 |
| 0.0686       | -0.135344444 | 0.910452436 |
| -0.2777      | -0.1354      | 0.910417377 |
| 0.0497       | -0.135411111 | 0.910410366 |
| 0.035766667  | -0.135433333 | 0.910396342 |
| -0.391933333 | -0.135466667 | 0.910375308 |
| -0.080566667 | -0.135477778 | 0.910368297 |
| -0.070633333 | -0.135533333 | 0.910333241 |
| -0.136866667 | -0.1356      | 0.910291175 |
| -0.019833333 | -0.135622222 | 0.910277154 |
| -0.271       | -0.135644444 | 0.910263133 |
| 0.113733333  | -0.135788889 | 0.910172001 |
| -0.082533333 | -0.135922222 | 0.910087887 |
| -0.0607      | -0.135933333 | 0.910080878 |
| -0.012633333 | -0.136       | 0.910038824 |
| -0.2467      | -0.136177778 | 0.90992669  |
| -0.022966667 | -0.136244444 | 0.909884644 |
| -0.097433333 | -0.136255556 | 0.909877636 |
| -0.091266667 | -0.136333333 | 0.909828585 |
| -0.0233      | -0.136355556 | 0.909814571 |

|              |              |             |
|--------------|--------------|-------------|
| -0.250933333 | -0.136377778 | 0.909800557 |
| -0.144066667 | -0.136388889 | 0.90979355  |
| -0.020433333 | -0.136433333 | 0.909765522 |
| 0.038        | -0.136588889 | 0.909667434 |
| 0.023        | -0.1366      | 0.909660428 |
| -0.108       | -0.136622222 | 0.909646417 |
| 0.1289       | -0.136655556 | 0.9096254   |
| -0.0952      | -0.136777778 | 0.909548341 |
| -0.169533333 | -0.136811111 | 0.909527326 |
| 0.040933333  | -0.136855556 | 0.909499307 |
| -0.165466667 | -0.136944444 | 0.909443272 |
| -0.1875      | -0.136955556 | 0.909436268 |
| -0.0959      | -0.137       | 0.909408252 |
| -0.115766667 | -0.137       | 0.909408252 |
| -0.113933333 | -0.137022222 | 0.909394244 |
| -0.2127      | -0.137066667 | 0.909366229 |
| 0.019233333  | -0.137122222 | 0.909331212 |
| -0.079966667 | -0.137244444 | 0.909254178 |
| -0.1006      | -0.137288889 | 0.909226168 |
| -0.205833333 | -0.137411111 | 0.909149143 |
| -0.292033333 | -0.137466667 | 0.909114134 |
| -0.250733333 | -0.137566667 | 0.909051121 |
| 0.049366667  | -0.137677778 | 0.908981112 |
| -0.1595      | -0.137688889 | 0.908974112 |
| -0.011766667 | -0.137744444 | 0.908939109 |
| -0.1084      | -0.137788889 | 0.908911109 |
| 0.036066667  | -0.137822222 | 0.908890109 |
| -0.107233333 | -0.137944444 | 0.908813113 |
| -0.129666667 | -0.137966667 | 0.908799114 |
| -0.019633333 | -0.137988889 | 0.908785116 |
| -0.018766667 | -0.138022222 | 0.908764118 |
| -0.1539      | -0.1381      | 0.908715127 |
| -0.202       | -0.138133333 | 0.908694131 |
| -0.057533333 | -0.138377778 | 0.908540179 |
| 0.0507       | -0.138555556 | 0.90842823  |
| -0.0257      | -0.138766667 | 0.908295308 |
| 0.051133333  | -0.138833333 | 0.908253337 |
| -0.0824      | -0.138833333 | 0.908253337 |
| -0.0009      | -0.138855556 | 0.908239347 |
| 0.037166667  | -0.138877778 | 0.908225357 |
| 0.031666667  | -0.138922222 | 0.908197379 |
| 0.020733333  | -0.138933333 | 0.908190384 |
| -0.079866667 | -0.139077778 | 0.908099459 |
| 0.054566667  | -0.139111111 | 0.908078478 |
| -0.128566667 | -0.139133333 | 0.908064491 |
| -0.306133333 | -0.1392      | 0.90802253  |
| -0.316666667 | -0.139211111 | 0.908015537 |

|              |              |             |
|--------------|--------------|-------------|
| -0.087366667 | -0.139233333 | 0.908001551 |
| 0.101066667  | -0.139322222 | 0.907945608 |
| -0.158166667 | -0.139333333 | 0.907938615 |
| -0.014533333 | -0.139355556 | 0.90792463  |
| -0.205       | -0.139433333 | 0.907875684 |
| 0.0783       | -0.139511111 | 0.90782674  |
| -0.0538      | -0.1396      | 0.907770808 |
| 0.011166667  | -0.139644444 | 0.907742843 |
| -0.164866667 | -0.139644444 | 0.907742843 |
| -0.0183      | -0.139755556 | 0.907672935 |
| -0.060933333 | -0.139755556 | 0.907672935 |
| 0.049533333  | -0.139811111 | 0.907637983 |
| -0.210433333 | -0.139811111 | 0.907637983 |
| -0.122033333 | -0.139833333 | 0.907624002 |
| -0.171333333 | -0.139855556 | 0.907610022 |
| -0.162733333 | -0.139877778 | 0.907596042 |
| -0.400133333 | -0.139933333 | 0.907561093 |
| -0.053166667 | -0.140033333 | 0.907498187 |
| 0.034266667  | -0.140066667 | 0.90747722  |
| -0.078366667 | -0.140088889 | 0.907463242 |
| -0.1946      | -0.1401      | 0.907456253 |
| -0.087166667 | -0.140211111 | 0.907386367 |
| -0.533433333 | -0.140277778 | 0.907344438 |
| -0.190533333 | -0.1403      | 0.907330462 |
| -0.129166667 | -0.140344444 | 0.90730251  |
| 0.008766667  | -0.140366667 | 0.907288535 |
| 0.0079       | -0.140511111 | 0.907197701 |
| -0.0669      | -0.1406      | 0.907141807 |
| -0.2272      | -0.140622222 | 0.907127834 |
| 0.000133333  | -0.140788889 | 0.907023045 |
| 0.009733333  | -0.1408      | 0.907016059 |
| -0.120966667 | -0.140822222 | 0.907002088 |
| -0.060266667 | -0.140833333 | 0.906995103 |
| 0.135066667  | -0.140855556 | 0.906981132 |
| -0.124766667 | -0.140888889 | 0.906960177 |
| -0.105033333 | -0.140911111 | 0.906946207 |
| -0.0454      | -0.140933333 | 0.906932237 |
| -0.2933      | -0.140944444 | 0.906925252 |
| 0.0632       | -0.140955556 | 0.906918268 |
| 0.0291       | -0.140977778 | 0.906904298 |
| 0.022266667  | -0.141       | 0.906890329 |
| -0.3503      | -0.141033333 | 0.906869376 |
| -0.092433333 | -0.141066667 | 0.906848423 |
| -0.031133333 | -0.141066667 | 0.906848423 |
| -0.094       | -0.141077778 | 0.906841438 |
| -0.039866667 | -0.141144444 | 0.906799534 |
| -0.053633333 | -0.141344444 | 0.906673834 |

|              |              |             |
|--------------|--------------|-------------|
| -0.139766667 | -0.141422222 | 0.906624955 |
| -0.311233333 | -0.141433333 | 0.906617973 |
| -0.263833333 | -0.141533333 | 0.906555133 |
| -0.3267      | -0.141533333 | 0.906555133 |
| 0.106633333  | -0.141544444 | 0.906548151 |
| -0.108766667 | -0.141622222 | 0.906499279 |
| 0.014066667  | -0.141677778 | 0.906464372 |
| -0.070533333 | -0.141677778 | 0.906464372 |
| -0.2227      | -0.141688889 | 0.906457391 |
| -0.099666667 | -0.141711111 | 0.906443429 |
| -0.051433333 | -0.141866667 | 0.906345699 |
| -0.2475      | -0.141866667 | 0.906345699 |
| -0.1253      | -0.141922222 | 0.906310797 |
| -0.0604      | -0.141944444 | 0.906296837 |
| 0.073566667  | -0.142       | 0.906261938 |
| -0.124166667 | -0.1421      | 0.906199123 |
| -0.022933333 | -0.142122222 | 0.906185165 |
| -0.197733333 | -0.142144444 | 0.906171207 |
| 0.011866667  | -0.142177778 | 0.90615027  |
| 0.0015       | -0.142233333 | 0.906115376 |
| -0.063066667 | -0.142288889 | 0.906080484 |
| -0.205033333 | -0.142311111 | 0.906066528 |
| -0.105733333 | -0.142322222 | 0.90605955  |
| -0.105       | -0.142355556 | 0.906038615 |
| -0.118333333 | -0.142388889 | 0.906017682 |
| -0.0587      | -0.142433333 | 0.905989771 |
| -0.003766667 | -0.142511111 | 0.905940929 |
| -0.0433      | -0.142533333 | 0.905926975 |
| 0.0276       | -0.142588889 | 0.90589209  |
| -0.069666667 | -0.142633333 | 0.905864183 |
| -0.142866667 | -0.142677778 | 0.905836277 |
| -0.367433333 | -0.143       | 0.905633983 |
| -0.133033333 | -0.143033333 | 0.905613059 |
| -0.253166667 | -0.143044444 | 0.905606084 |
| 0.113866667  | -0.143044444 | 0.905606084 |
| -0.249633333 | -0.143066667 | 0.905592135 |
| -0.065133333 | -0.143077778 | 0.90558516  |
| 0.1482       | -0.143088889 | 0.905578186 |
| -0.121766667 | -0.143122222 | 0.905557263 |
| 0.085266667  | -0.143188889 | 0.905515418 |
| -0.183666667 | -0.1432      | 0.905508444 |
| -0.053966667 | -0.143233333 | 0.905487523 |
| -0.123433333 | -0.143377778 | 0.905396869 |
| -0.1599      | -0.143533333 | 0.905299251 |
| 0.1287       | -0.143555556 | 0.905285307 |
| 0.0187       | -0.143588889 | 0.905264391 |
| -0.0286      | -0.143611111 | 0.905250447 |

|              |              |             |
|--------------|--------------|-------------|
| -0.1389      | -0.143633333 | 0.905236503 |
| -0.136466667 | -0.143644444 | 0.905229531 |
| -0.0869      | -0.144077778 | 0.904957674 |
| 0.031366667  | -0.144077778 | 0.904957674 |
| -0.1526      | -0.144133333 | 0.904922826 |
| 0.009966667  | -0.144133333 | 0.904922826 |
| -0.252633333 | -0.1442      | 0.904881011 |
| -0.124333333 | -0.144211111 | 0.904874042 |
| 0.109366667  | -0.144322222 | 0.904804355 |
| -0.1565      | -0.144422222 | 0.904741641 |
| 0.0729       | -0.144444444 | 0.904727705 |
| -0.048233333 | -0.144488889 | 0.904699834 |
| -0.084133333 | -0.144533333 | 0.904671963 |
| -0.064266667 | -0.1446      | 0.90463016  |
| 0.155433333  | -0.144666667 | 0.904588358 |
| 0.003133333  | -0.144677778 | 0.904581391 |
| -0.216033333 | -0.144722222 | 0.904553524 |
| 0.048233333  | -0.144744444 | 0.904539591 |
| -0.2506      | -0.144777778 | 0.904518692 |
| -0.038733333 | -0.144811111 | 0.904497794 |
| -0.042133333 | -0.144833333 | 0.904483862 |
| -0.051666667 | -0.144833333 | 0.904483862 |
| 0.208        | -0.144888889 | 0.904449032 |
| -0.191533333 | -0.144977778 | 0.904393308 |
| -0.214333333 | -0.144988889 | 0.904386343 |
| -0.106066667 | -0.145       | 0.904379378 |
| -0.027433333 | -0.145133333 | 0.904295799 |
| -0.066333333 | -0.145155556 | 0.90428187  |
| -0.353966667 | -0.1453      | 0.904191337 |
| -0.022433333 | -0.145344444 | 0.904163482 |
| -0.099666667 | -0.145344444 | 0.904163482 |
| -0.022133333 | -0.145377778 | 0.904142592 |
| 0.0223       | -0.145422222 | 0.904114739 |
| -0.019733333 | -0.145444444 | 0.904100812 |
| -0.141833333 | -0.145533333 | 0.90404511  |
| 0.081        | -0.145544444 | 0.904038147 |
| -0.192766667 | -0.145666667 | 0.903961562 |
| -0.232466667 | -0.145688889 | 0.903947638 |
| -0.396366667 | -0.1457      | 0.903940676 |
| -0.1053      | -0.145733333 | 0.903919791 |
| -0.073166667 | -0.145755556 | 0.903905868 |
| -0.1         | -0.145777778 | 0.903891945 |
| -0.142266667 | -0.145855556 | 0.903843216 |
| -0.187033333 | -0.145944444 | 0.903787529 |
| -0.042133333 | -0.145955556 | 0.903780569 |
| -0.295233333 | -0.145977778 | 0.903766648 |
| 0.211033333  | -0.146011111 | 0.903745766 |

|              |              |             |
|--------------|--------------|-------------|
| -0.1201      | -0.146066667 | 0.903710965 |
| 0.011433333  | -0.146088889 | 0.903697045 |
| 0.1505       | -0.146166667 | 0.903648327 |
| -0.5069      | -0.146211111 | 0.903620489 |
| -0.0195      | -0.146255556 | 0.903592652 |
| -0.008166667 | -0.146288889 | 0.903571775 |
| -0.0723      | -0.146455556 | 0.903467396 |
| -0.0071      | -0.146455556 | 0.903467396 |
| -0.174333333 | -0.146522222 | 0.903425648 |
| -0.7993      | -0.146522222 | 0.903425648 |
| -0.022366667 | -0.146544444 | 0.903411733 |
| -0.069833333 | -0.146677778 | 0.903328244 |
| -0.109633333 | -0.1467      | 0.90331433  |
| -0.200633333 | -0.146711111 | 0.903307373 |
| 0.0821       | -0.146744444 | 0.903286502 |
| -0.263366667 | -0.146866667 | 0.903209981 |
| -0.1244      | -0.146966667 | 0.903147377 |
| -0.1076      | -0.146977778 | 0.903140421 |
| 0.2432       | -0.147055556 | 0.903091733 |
| -0.2307      | -0.147066667 | 0.903084778 |
| -0.0674      | -0.147155556 | 0.903029138 |
| 0.004933333  | -0.147188889 | 0.903008274 |
| -0.1043      | -0.1472      | 0.903001319 |
| -0.2605      | -0.147266667 | 0.902959592 |
| 0.004433333  | -0.147311111 | 0.902931776 |
| -0.090433333 | -0.1474      | 0.902876145 |
| -0.002533333 | -0.147455556 | 0.902841378 |
| 0.172066667  | -0.147477778 | 0.902827471 |
| -0.095866667 | -0.147533333 | 0.902792705 |
| -0.074833333 | -0.147577778 | 0.902764894 |
| -0.382066667 | -0.147655556 | 0.902716226 |
| 0.034233333  | -0.147788889 | 0.902632801 |
| -0.1328      | -0.147844444 | 0.902598043 |
| -0.064133333 | -0.147944444 | 0.902535482 |
| -0.1294      | -0.147977778 | 0.902514629 |
| -0.133466667 | -0.148044444 | 0.902472925 |
| 0.027066667  | -0.148077778 | 0.902452074 |
| -0.290633333 | -0.1481      | 0.902438173 |
| -0.0763      | -0.148155556 | 0.902403422 |
| -0.424566667 | -0.1482      | 0.902375623 |
| 0.067666667  | -0.148222222 | 0.902361724 |
| -0.120933333 | -0.1484      | 0.902250536 |
| -0.2997      | -0.148422222 | 0.902236638 |
| -0.034066667 | -0.148477778 | 0.902201895 |
| -0.1116      | -0.148511111 | 0.90218105  |
| -0.048733333 | -0.148544444 | 0.902160206 |
| 0.0693       | -0.148566667 | 0.90214631  |

|              |              |             |
|--------------|--------------|-------------|
| -0.091333333 | -0.148588889 | 0.902132414 |
| -0.209766667 | -0.148722222 | 0.902049043 |
| 0.021366667  | -0.149022222 | 0.901861487 |
| -0.029366667 | -0.149055556 | 0.901840649 |
| -0.099433333 | -0.149066667 | 0.901833704 |
| 0.1578       | -0.149144444 | 0.901785086 |
| 0.606066667  | -0.149211111 | 0.901743416 |
| -0.019533333 | -0.149244444 | 0.901722581 |
| -0.131633333 | -0.149244444 | 0.901722581 |
| -0.049233333 | -0.149288889 | 0.901694803 |
| -0.264633333 | -0.149355556 | 0.901653136 |
| 0.068266667  | -0.149355556 | 0.901653136 |
| 0.034866667  | -0.149455556 | 0.901590641 |
| -0.3064      | -0.149455556 | 0.901590641 |
| 0.048233333  | -0.149477778 | 0.901576753 |
| -0.053333333 | -0.149555556 | 0.901528149 |
| -0.104966667 | -0.149588889 | 0.90150732  |
| -0.0883      | -0.149666667 | 0.90145872  |
| -0.171733333 | -0.149788889 | 0.901382353 |
| -0.126866667 | -0.149788889 | 0.901382353 |
| 0.199033333  | -0.149855556 | 0.901340701 |
| -0.133533333 | -0.149877778 | 0.901326818 |
| -0.270666667 | -0.149966667 | 0.901271286 |
| -0.0243      | -0.150033333 | 0.90122964  |
| -0.021133333 | -0.150044444 | 0.901222699 |
| -0.097766667 | -0.150077778 | 0.901201876 |
| -0.136033333 | -0.150133333 | 0.901167173 |
| -0.023033333 | -0.150144444 | 0.901160233 |
| -0.235033333 | -0.150166667 | 0.901146352 |
| -0.023766667 | -0.150244444 | 0.901097771 |
| 0.026033333  | -0.150322222 | 0.901049193 |
| -0.0669      | -0.150344444 | 0.901035314 |
| -0.0333      | -0.150366667 | 0.901021435 |
| -0.074266667 | -0.150433333 | 0.9009798   |
| -0.111366667 | -0.150466667 | 0.900958983 |
| -0.0363      | -0.150511111 | 0.900931228 |
| 0.001233333  | -0.150588889 | 0.900882659 |
| -0.053366667 | -0.150644444 | 0.900847969 |
| -0.1796      | -0.150666667 | 0.900834093 |
| -0.122433333 | -0.150733333 | 0.900792466 |
| -0.117333333 | -0.150733333 | 0.900792466 |
| -0.0605      | -0.1508      | 0.900750842 |
| 0.074533333  | -0.150855556 | 0.900716156 |
| -0.245433333 | -0.150866667 | 0.900709219 |
| -0.153866667 | -0.150888889 | 0.900695345 |
| 0.037866667  | -0.150933333 | 0.900667599 |
| -0.110433333 | -0.150955556 | 0.900653725 |

|              |              |             |
|--------------|--------------|-------------|
| -0.5231      | -0.150955556 | 0.900653725 |
| -0.500433333 | -0.151       | 0.90062598  |
| -0.087233333 | -0.151044444 | 0.900598235 |
| 0.172766667  | -0.1511      | 0.900563555 |
| -0.053033333 | -0.151133333 | 0.900542748 |
| -0.0843      | -0.151144444 | 0.900535813 |
| -0.1388      | -0.151211111 | 0.9004942   |
| 0.0391       | -0.151344444 | 0.90041098  |
| -0.146533333 | -0.151433333 | 0.900355505 |
| -0.0642      | -0.151444444 | 0.900348571 |
| 0.082866667  | -0.151477778 | 0.900327769 |
| -0.0997      | -0.151477778 | 0.900327769 |
| -0.137666667 | -0.151488889 | 0.900320835 |
| -0.148133333 | -0.1515      | 0.900313901 |
| -0.1323      | -0.1516      | 0.900251498 |
| 0.141666667  | -0.151611111 | 0.900244565 |
| -0.039466667 | -0.151622222 | 0.900237631 |
| -0.079466667 | -0.151755556 | 0.900154435 |
| -0.153466667 | -0.151811111 | 0.900119773 |
| 0.131733333  | -0.151988889 | 0.900008861 |
| -0.225466667 | -0.152022222 | 0.899988067 |
| -0.155933333 | -0.152133333 | 0.899918756 |
| -0.1382      | -0.152188889 | 0.899884102 |
| -0.218266667 | -0.152444444 | 0.899724713 |
| -0.21        | -0.152466667 | 0.899710854 |
| 0.113333333  | -0.152522222 | 0.899676209 |
| -0.037533333 | -0.152588889 | 0.899634636 |
| 0.042333333  | -0.152655556 | 0.899593065 |
| -0.371933333 | -0.152688889 | 0.89957228  |
| -0.1842      | -0.152833333 | 0.899482218 |
| -0.029533333 | -0.152877778 | 0.899454509 |
| 0.118366667  | -0.152888889 | 0.899447582 |
| -0.124366667 | -0.152922222 | 0.8994268   |
| 0.102633333  | -0.152922222 | 0.8994268   |
| 0.065466667  | -0.152944444 | 0.899412946 |
| -0.009033333 | -0.152955556 | 0.899406019 |
| -0.043733333 | -0.153011111 | 0.899371385 |
| -0.133766667 | -0.153066667 | 0.899336753 |
| -0.123966667 | -0.1531      | 0.899315974 |
| -0.220866667 | -0.153188889 | 0.899260566 |
| 0.197733333  | -0.1532      | 0.89925364  |
| -0.230833333 | -0.153222222 | 0.899239789 |
| -0.1002      | -0.153244444 | 0.899225938 |
| 0.012733333  | -0.153288889 | 0.899198236 |
| 0.165666667  | -0.1533      | 0.899191311 |
| -0.2423      | -0.153355556 | 0.899156686 |
| 0.146866667  | -0.153455556 | 0.899094363 |



|              |              |             |
|--------------|--------------|-------------|
| -0.120966667 | -0.153588889 | 0.899011273 |
| -0.040033333 | -0.153611111 | 0.898997425 |
| -0.062866667 | -0.153722222 | 0.89892819  |
| -0.0722      | -0.153744444 | 0.898914344 |
| -0.090633333 | -0.153844444 | 0.898852038 |
| -0.1084      | -0.153877778 | 0.898831271 |
| -0.002566667 | -0.154       | 0.898755127 |
| -0.0571      | -0.154033333 | 0.898734361 |
| -0.132733333 | -0.1541      | 0.898692832 |
| 0.067733333  | -0.154322222 | 0.898554414 |
| -0.101933333 | -0.154355556 | 0.898533654 |
| 0.099533333  | -0.154533333 | 0.898422938 |
| -0.039433333 | -0.154666667 | 0.898339909 |
| -0.061766667 | -0.154711111 | 0.898312235 |
| 0.094433333  | -0.154933333 | 0.898173876 |
| 0.104033333  | -0.155011111 | 0.898125456 |
| -0.6919      | -0.155066667 | 0.898090871 |
| -0.026233333 | -0.155133333 | 0.898049372 |
| 0.0264       | -0.155133333 | 0.898049372 |
| -0.106633333 | -0.155166667 | 0.898028623 |
| 0.007266667  | -0.155222222 | 0.897994042 |
| -0.134733333 | -0.155322222 | 0.8979318   |
| -0.003033333 | -0.155444444 | 0.897855732 |
| -0.004233333 | -0.155455556 | 0.897848817 |
| -0.073733333 | -0.155477778 | 0.897834987 |
| -0.065233333 | -0.155733333 | 0.897675961 |
| 0.1701       | -0.155744444 | 0.897669048 |
| 0.0964       | -0.155755556 | 0.897662134 |
| -0.003166667 | -0.155811111 | 0.897627567 |
| 0.206166667  | -0.155833333 | 0.897613741 |
| -0.083733333 | -0.155877778 | 0.897586089 |
| -0.1365      | -0.1561      | 0.897447842 |
| -0.1674      | -0.156166667 | 0.897406372 |
| -0.046233333 | -0.156177778 | 0.897399461 |
| 0.056733333  | -0.156211111 | 0.897378727 |
| -0.025633333 | -0.156288889 | 0.897330349 |
| -0.111466667 | -0.1564      | 0.897261243 |
| -0.249933333 | -0.156422222 | 0.897247422 |
| -0.244566667 | -0.156422222 | 0.897247422 |
| -0.0261      | -0.1565      | 0.897199051 |
| 0.1238       | -0.156522222 | 0.897185232 |
| -0.157766667 | -0.156533333 | 0.897178322 |
| -0.133633333 | -0.156555556 | 0.897164502 |
| -0.028066667 | -0.156555556 | 0.897164502 |
| 0.0945       | -0.1566      | 0.897136864 |
| 0.124566667  | -0.156644444 | 0.897109227 |
| -0.1324      | -0.156655556 | 0.897102318 |

|              |              |             |
|--------------|--------------|-------------|
| -0.198366667 | -0.156744444 | 0.897047046 |
| -0.117966667 | -0.156766667 | 0.897033229 |
| -0.258933333 | -0.156788889 | 0.897019412 |
| -0.1227      | -0.156911111 | 0.896943421 |
| -0.019866667 | -0.156955556 | 0.89691579  |
| 0.0912       | -0.157       | 0.89688816  |
| -0.105133333 | -0.157044444 | 0.89686053  |
| -0.015533333 | -0.157133333 | 0.896805273 |
| 0.0193       | -0.157288889 | 0.896708582 |
| -0.282133333 | -0.157366667 | 0.896660241 |
| 0.0057       | -0.157388889 | 0.89664643  |
| -0.155766667 | -0.157611111 | 0.896508327 |
| -0.1766      | -0.157677778 | 0.896466901 |
| -0.1898      | -0.157688889 | 0.896459997 |
| -0.073       | -0.157688889 | 0.896459997 |
| -0.057166667 | -0.157711111 | 0.896446188 |
| -0.365233333 | -0.157777778 | 0.896404765 |
| -0.132966667 | -0.157866667 | 0.896349536 |
| 0.015466667  | -0.157888889 | 0.896335729 |
| 0.1155       | -0.157888889 | 0.896335729 |
| -0.232166667 | -0.157888889 | 0.896335729 |
| -0.1513      | -0.1579      | 0.896328826 |
| -0.060666667 | -0.157911111 | 0.896321923 |
| -0.161766667 | -0.157922222 | 0.89631502  |
| -0.117666667 | -0.157955556 | 0.896294311 |
| -0.067166667 | -0.158188889 | 0.896149361 |
| -0.317766667 | -0.158233333 | 0.896121754 |
| -0.099833333 | -0.158333333 | 0.896059642 |
| -0.150033333 | -0.158477778 | 0.895969932 |
| -0.038933333 | -0.158488889 | 0.895963031 |
| -0.082666667 | -0.1585      | 0.895956131 |
| -0.2474      | -0.1586      | 0.89589403  |
| -0.094133333 | -0.158688889 | 0.895838833 |
| -0.0773      | -0.158722222 | 0.895818135 |
| 0.062933333  | -0.158877778 | 0.895721551 |
| -0.0042      | -0.158955556 | 0.895673262 |
| 0.0067       | -0.159       | 0.89564567  |
| -0.042566667 | -0.159088889 | 0.895590488 |
| 0.093633333  | -0.159111111 | 0.895576693 |
| -0.078666667 | -0.159122222 | 0.895569796 |
| -0.139066667 | -0.159155556 | 0.895549104 |
| -0.282833333 | -0.159211111 | 0.895514619 |
| -0.176166667 | -0.159233333 | 0.895500825 |
| -0.0498      | -0.159322222 | 0.895445652 |
| 0.095366667  | -0.159355556 | 0.895424963 |
| -0.1598      | -0.159422222 | 0.895383587 |
| 0.026433333  | -0.159433333 | 0.895376691 |

|              |              |             |
|--------------|--------------|-------------|
| -0.0195      | -0.159477778 | 0.895349108 |
| -0.079866667 | -0.159477778 | 0.895349108 |
| 0.051633333  | -0.159677778 | 0.895224995 |
| -0.0555      | -0.159722222 | 0.895197416 |
| -0.172133333 | -0.159744444 | 0.895183628 |
| -0.179866667 | -0.159933333 | 0.895066431 |
| -0.145533333 | -0.159966667 | 0.895045751 |
| 0.081133333  | -0.159977778 | 0.895038857 |
| -0.083666667 | -0.160222222 | 0.894887218 |
| -0.045366667 | -0.1603      | 0.894838975 |
| 0.143466667  | -0.160344444 | 0.894811409 |
| 0.4346       | -0.160477778 | 0.894728714 |
| -0.080533333 | -0.160511111 | 0.894708042 |
| -0.207633333 | -0.160555556 | 0.894680479 |
| 0.1999       | -0.160577778 | 0.894666699 |
| -0.030433333 | -0.160588889 | 0.894659808 |
| -0.221966667 | -0.160622222 | 0.894639137 |
| -0.2252      | -0.160666667 | 0.894611577 |
| -0.3945      | -0.160711111 | 0.894584018 |
| -0.159166667 | -0.1608      | 0.894528901 |
| -0.1053      | -0.160822222 | 0.894515123 |
| -0.066333333 | -0.160911111 | 0.894460011 |
| -0.141766667 | -0.160977778 | 0.894418679 |
| -0.413166667 | -0.161055556 | 0.894370461 |
| -0.012833333 | -0.161077778 | 0.894356684 |
| -0.025066667 | -0.161144444 | 0.894315357 |
| -0.168266667 | -0.161288889 | 0.894225822 |
| -0.076033333 | -0.1614      | 0.894156954 |
| -0.099433333 | -0.161722222 | 0.893957269 |
| -0.116133333 | -0.161777778 | 0.893922845 |
| 0.0686       | -0.161822222 | 0.893895307 |
| -0.0345      | -0.161855556 | 0.893874654 |
| -0.0035      | -0.161911111 | 0.893840233 |
| -0.167133333 | -0.161955556 | 0.893812697 |
| -0.134933333 | -0.162133333 | 0.893702563 |
| -0.015466667 | -0.162188889 | 0.893668149 |
| -0.084033333 | -0.162255556 | 0.893626853 |
| 0.016166667  | -0.1623      | 0.893599324 |
| -0.056233333 | -0.162377778 | 0.89355115  |
| 0.053233333  | -0.162411111 | 0.893530505 |
| -0.096966667 | -0.162466667 | 0.893496098 |
| -0.068433333 | -0.162644444 | 0.893386002 |
| 0.052133333  | -0.162644444 | 0.893386002 |
| -0.071333333 | -0.1627      | 0.8933516   |
| 0.077866667  | -0.1627      | 0.8933516   |
| -0.257166667 | -0.162711111 | 0.89334472  |
| 0.009133333  | -0.162922222 | 0.893214006 |

|              |              |             |
|--------------|--------------|-------------|
| -0.049566667 | -0.162955556 | 0.893193368 |
| -0.052966667 | -0.163055556 | 0.893131459 |
| -0.106866667 | -0.163122222 | 0.893090188 |
| -0.070933333 | -0.163288889 | 0.89298702  |
| -0.0502      | -0.163377778 | 0.892932002 |
| -0.019866667 | -0.163433333 | 0.892897618 |
| -0.4019      | -0.163444444 | 0.892890741 |
| -0.142633333 | -0.163455556 | 0.892883865 |
| -0.346133333 | -0.163755556 | 0.892698214 |
| 0.179166667  | -0.163866667 | 0.892629464 |
| 0.031433333  | -0.163866667 | 0.892629464 |
| 0.0218       | -0.163988889 | 0.892553846 |
| 0.0114       | -0.164044444 | 0.892519476 |
| -0.173133333 | -0.164255556 | 0.892388882 |
| -0.0594      | -0.1643      | 0.892361391 |
| 0.0186       | -0.164344444 | 0.892333901 |
| 0.0518       | -0.164366667 | 0.892320156 |
| -0.090666667 | -0.164411111 | 0.892292667 |
| -0.226       | -0.164411111 | 0.892292667 |
| -0.097933333 | -0.164422222 | 0.892285795 |
| -0.091133333 | -0.164488889 | 0.892244564 |
| -0.2485      | -0.1645      | 0.892237692 |
| -0.1437      | -0.164633333 | 0.892155235 |
| -0.017033333 | -0.164677778 | 0.892127752 |
| -0.197633333 | -0.164877778 | 0.892004085 |
| -0.219466667 | -0.164944444 | 0.891962867 |
| 0.112833333  | -0.164966667 | 0.891949128 |
| -0.650633333 | -0.164977778 | 0.891942258 |
| -0.058966667 | -0.165022222 | 0.891914781 |
| -0.042233333 | -0.165055556 | 0.891894174 |
| -0.237466667 | -0.165133333 | 0.891846092 |
| -0.028833333 | -0.165155556 | 0.891832354 |
| 0.302533333  | -0.165166667 | 0.891825486 |
| 0.021766667  | -0.165211111 | 0.891798012 |
| -0.218966667 | -0.165311111 | 0.8917362   |
| -0.261366667 | -0.165322222 | 0.891729332 |
| -0.167966667 | -0.165333333 | 0.891722464 |
| -0.1451      | -0.165388889 | 0.891688126 |
| 0.040866667  | -0.165455556 | 0.891646922 |
| -0.106033333 | -0.165555556 | 0.89158512  |
| -0.298366667 | -0.165688889 | 0.891502724 |
| 0.062333333  | -0.1657      | 0.891495858 |
| 0.023633333  | -0.165744444 | 0.891468394 |
| -0.106233333 | -0.165766667 | 0.891454663 |
| -0.148033333 | -0.165788889 | 0.891440932 |
| -0.4998      | -0.165811111 | 0.891427201 |
| -0.060933333 | -0.165866667 | 0.891392874 |

|              |              |             |
|--------------|--------------|-------------|
| -0.048466667 | -0.1659      | 0.891372279 |
| -0.014633333 | -0.166       | 0.891310496 |
| 0.022666667  | -0.166011111 | 0.891303631 |
| -0.480133333 | -0.166066667 | 0.89126931  |
| -0.096666667 | -0.166111111 | 0.891241853 |
| -0.1057      | -0.166188889 | 0.891193806 |
| -0.216633333 | -0.166244444 | 0.891159489 |
| 0.029        | -0.166277778 | 0.891138899 |
| 0.055933333  | -0.166355556 | 0.891090857 |
| -0.206133333 | -0.166388889 | 0.891070269 |
| -0.056866667 | -0.166411111 | 0.891056544 |
| 0.0416       | -0.166433333 | 0.891042819 |
| -0.184033333 | -0.166455556 | 0.891029094 |
| -0.0189      | -0.166677778 | 0.890891857 |
| -0.218866667 | -0.166755556 | 0.890843829 |
| -0.145733333 | -0.166777778 | 0.890830107 |
| -0.166133333 | -0.167055556 | 0.890658602 |
| -0.198866667 | -0.167111111 | 0.890624305 |
| -0.039466667 | -0.1672      | 0.890569433 |
| -0.0929      | -0.1672      | 0.890569433 |
| -0.023366667 | -0.167222222 | 0.890555715 |
| -0.032266667 | -0.167233333 | 0.890548857 |
| -0.142266667 | -0.167411111 | 0.890439124 |
| -0.031633333 | -0.167455556 | 0.890411694 |
| -0.0006      | -0.167544444 | 0.890356834 |
| -0.052       | -0.167622222 | 0.890308835 |
| -0.068366667 | -0.167688889 | 0.890267695 |
| -0.053266667 | -0.1677      | 0.890260839 |
| -0.0764      | -0.167777778 | 0.890212845 |
| -0.1904      | -0.167888889 | 0.890144286 |
| -0.076833333 | -0.167944444 | 0.890110009 |
| -0.196733333 | -0.167944444 | 0.890110009 |
| -0.0529      | -0.167977778 | 0.890089443 |
| -0.092166667 | -0.168077778 | 0.890027749 |
| 0.0768       | -0.1682      | 0.889952351 |
| -0.355466667 | -0.168288889 | 0.88989752  |
| -0.089333333 | -0.1683      | 0.889890666 |
| -0.1244      | -0.168344444 | 0.889863252 |
| 0.026366667  | -0.1684      | 0.889828986 |
| -0.129566667 | -0.1684      | 0.889828986 |
| 0.0166       | -0.168411111 | 0.889822133 |
| -0.064633333 | -0.168588889 | 0.88971249  |
| -0.266566667 | -0.168622222 | 0.889691934 |
| -0.042333333 | -0.168655556 | 0.889671378 |
| -0.057933333 | -0.1687      | 0.889643971 |
| 0.0213       | -0.168811111 | 0.889575456 |
| -0.040433333 | -0.168911111 | 0.889513798 |

|              |              |             |
|--------------|--------------|-------------|
| -0.110033333 | -0.169       | 0.889458994 |
| -0.175233333 | -0.169066667 | 0.889417893 |
| -0.2918      | -0.169088889 | 0.889404193 |
| -0.214366667 | -0.169288889 | 0.889280904 |
| -0.0405      | -0.1694      | 0.889212417 |
| -0.0543      | -0.1694      | 0.889212417 |
| 0.0461       | -0.169433333 | 0.889191872 |
| -0.064266667 | -0.169477778 | 0.88916448  |
| -0.129533333 | -0.169511111 | 0.889143936 |
| -0.1973      | -0.169544444 | 0.889123393 |
| 0.1933       | -0.169555556 | 0.889116545 |
| -0.171533333 | -0.169688889 | 0.889034377 |
| -0.082366667 | -0.1697      | 0.88902753  |
| -0.140433333 | -0.169733333 | 0.889006989 |
| 0.018133333  | -0.169822222 | 0.888952217 |
| -0.050533333 | -0.1699      | 0.888904293 |
| -0.157166667 | -0.169966667 | 0.888863218 |
| 0.0939       | -0.170111111 | 0.888774228 |
| 0.220766667  | -0.170111111 | 0.888774228 |
| -0.040533333 | -0.170111111 | 0.888774228 |
| -0.048266667 | -0.170411111 | 0.888589432 |
| -0.1815      | -0.170488889 | 0.888541528 |
| 0.0969       | -0.170855556 | 0.888315731 |
| -0.260566667 | -0.170955556 | 0.888254159 |
| 0.109333333  | -0.170977778 | 0.888240478 |
| -0.119033333 | -0.171022222 | 0.888213114 |
| 0.1039       | -0.171055556 | 0.888192593 |
| -0.047766667 | -0.171066667 | 0.888185752 |
| -0.188133333 | -0.171211111 | 0.88809683  |
| -0.0829      | -0.171311111 | 0.888035274 |
| -0.062033333 | -0.171344444 | 0.888014756 |
| -0.254066667 | -0.1715      | 0.887919013 |
| -0.363066667 | -0.171511111 | 0.887912175 |
| -0.1639      | -0.171577778 | 0.887871146 |
| -0.070133333 | -0.171588889 | 0.887864307 |
| 0.024266667  | -0.1717      | 0.88779593  |
| -0.146733333 | -0.1717      | 0.88779593  |
| -0.007033333 | -0.172011111 | 0.887604501 |
| -0.004833333 | -0.172077778 | 0.887563486 |
| -0.230266667 | -0.172111111 | 0.887542979 |
| 0.009        | -0.172166667 | 0.887508802 |
| -0.1441      | -0.172288889 | 0.887433618 |
| -0.0381      | -0.172311111 | 0.887419948 |
| 0.154666667  | -0.172355556 | 0.88739261  |
| -0.114566667 | -0.172388889 | 0.887372107 |
| -0.2295      | -0.172488889 | 0.887310602 |
| -0.050833333 | -0.172522222 | 0.887290101 |

|              |              |             |
|--------------|--------------|-------------|
| 0.0694       | -0.172555556 | 0.8872696   |
| -0.362933333 | -0.172588889 | 0.8872491   |
| -0.254366667 | -0.1727      | 0.88718077  |
| -0.1405      | -0.172711111 | 0.887173937 |
| 0.000266667  | -0.173166667 | 0.886893841 |
| 0.028733333  | -0.173344444 | 0.886784559 |
| -0.052333333 | -0.173344444 | 0.886784559 |
| -0.040466667 | -0.173655556 | 0.886593349 |
| -0.080833333 | -0.173688889 | 0.886572864 |
| -0.1515      | -0.173744444 | 0.886538725 |
| -0.229933333 | -0.173777778 | 0.886518241 |
| -0.138533333 | -0.173811111 | 0.886497759 |
| -0.1517      | -0.173811111 | 0.886497759 |
| -0.3184      | -0.173833333 | 0.886484104 |
| -0.001866667 | -0.173866667 | 0.886463622 |
| 0.0988       | -0.173933333 | 0.88642266  |
| -0.183433333 | -0.173944444 | 0.886415833 |
| -0.037       | -0.173977778 | 0.886395352 |
| -0.0117      | -0.174088889 | 0.886327088 |
| -0.223633333 | -0.174188889 | 0.886265655 |
| -0.1337      | -0.174466667 | 0.886095029 |
| -0.153033333 | -0.174477778 | 0.886088204 |
| -0.2636      | -0.1745      | 0.886074556 |
| 0.154133333  | -0.174533333 | 0.886054084 |
| 0.074066667  | -0.174544444 | 0.886047259 |
| -0.0332      | -0.174611111 | 0.886006316 |
| 0.2992       | -0.174755556 | 0.885917613 |
| -0.172833333 | -0.174866667 | 0.885849385 |
| -0.254333333 | -0.174877778 | 0.885842563 |
| -0.1616      | -0.174933333 | 0.885808451 |
| -0.0104      | -0.175277778 | 0.885596989 |
| -0.0654      | -0.175322222 | 0.885569707 |
| 0.010466667  | -0.175333333 | 0.885562887 |
| -0.0193      | -0.1754      | 0.885521966 |
| -0.104033333 | -0.175577778 | 0.885412853 |
| -0.321666667 | -0.175666667 | 0.885358302 |
| -0.1712      | -0.175822222 | 0.885262845 |
| 0.030866667  | -0.1759      | 0.885215121 |
| -0.118033333 | -0.175977778 | 0.885167399 |
| -0.0311      | -0.175988889 | 0.885160582 |
| -0.0786      | -0.176       | 0.885153765 |
| 0.0445       | -0.176044444 | 0.885126496 |
| -0.2345      | -0.176055556 | 0.88511968  |
| -0.193666667 | -0.176166667 | 0.885051514 |
| -0.1526      | -0.176222222 | 0.885017432 |
| -0.2351      | -0.176233333 | 0.885010616 |
| 0.044066667  | -0.176244444 | 0.8850038   |

|              |              |             |
|--------------|--------------|-------------|
| -0.158266667 | -0.176244444 | 0.8850038   |
| -0.0517      | -0.1764      | 0.884908382 |
| -0.259666667 | -0.176488889 | 0.884853862 |
| -0.568833333 | -0.176711111 | 0.884717576 |
| -0.001966667 | -0.176722222 | 0.884710762 |
| -0.1606      | -0.176733333 | 0.884703948 |
| -0.080533333 | -0.176855556 | 0.884629001 |
| -0.0755      | -0.176866667 | 0.884622188 |
| -0.109833333 | -0.176944444 | 0.884574498 |
| -0.214033333 | -0.177       | 0.884540435 |
| -0.310366667 | -0.177044444 | 0.884513186 |
| -0.2289      | -0.177222222 | 0.884404198 |
| 0.037066667  | -0.177222222 | 0.884404198 |
| 0.136333333  | -0.177311111 | 0.884349708 |
| -0.132933333 | -0.177388889 | 0.884302033 |
| -0.085       | -0.177477778 | 0.88424755  |
| -0.2799      | -0.177477778 | 0.88424755  |
| -0.0844      | -0.177511111 | 0.88422712  |
| -0.0121      | -0.177588889 | 0.884179451 |
| -0.0348      | -0.177644444 | 0.884145404 |
| -0.118833333 | -0.1777      | 0.884111358 |
| 0.007266667  | -0.177722222 | 0.88409774  |
| -0.137133333 | -0.177733333 | 0.884090931 |
| 0.0407       | -0.177844444 | 0.884022844 |
| 0.0631       | -0.178155556 | 0.883832229 |
| 0.257333333  | -0.178355556 | 0.883709712 |
| 0.059866667  | -0.178377778 | 0.8836961   |
| -0.224966667 | -0.1784      | 0.883682488 |
| -0.1098      | -0.178411111 | 0.883675683 |
| -0.153333333 | -0.178433333 | 0.883662071 |
| -0.2224      | -0.178588889 | 0.883566797 |
| 0.094366667  | -0.178611111 | 0.883553188 |
| -0.131533333 | -0.178666667 | 0.883519164 |
| -0.1316      | -0.1791      | 0.883253827 |
| -0.090733333 | -0.1791      | 0.883253827 |
| -0.102033333 | -0.179133333 | 0.88323342  |
| -0.1397      | -0.179155556 | 0.883219815 |
| -0.011933333 | -0.179177778 | 0.883206211 |
| -0.051033333 | -0.1793      | 0.88313139  |
| 0.0419       | -0.179466667 | 0.883029373 |
| -0.260366667 | -0.1795      | 0.883008971 |
| 0.0062       | -0.179855556 | 0.882791378 |
| -0.151433333 | -0.18        | 0.882702996 |
| 0.038933333  | -0.18        | 0.882702996 |
| 0.019        | -0.180022222 | 0.8826894   |
| 0.094866667  | -0.180033333 | 0.882682602 |
| -0.0264      | -0.180155556 | 0.882607826 |



|              |              |             |
|--------------|--------------|-------------|
| -0.120833333 | -0.180188889 | 0.882587433 |
| -0.130833333 | -0.180188889 | 0.882587433 |
| -0.176566667 | -0.180211111 | 0.882573839 |
| -0.184166667 | -0.180255556 | 0.88254665  |
| -0.507733333 | -0.180466667 | 0.882417516 |
| -0.0884      | -0.180588889 | 0.882342762 |
| 0.121333333  | -0.1807      | 0.88227481  |
| 0.068933333  | -0.180733333 | 0.882254425 |
| -0.0785      | -0.180777778 | 0.882227247 |
| -0.1346      | -0.180977778 | 0.882104952 |
| -0.019966667 | -0.181033333 | 0.882070985 |
| -0.080566667 | -0.181055556 | 0.882057398 |
| -0.160333333 | -0.181077778 | 0.882043812 |
| -0.1366      | -0.1812      | 0.88196909  |
| -0.098966667 | -0.181211111 | 0.881962297 |
| -0.0989      | -0.181344444 | 0.88188079  |
| 0.055        | -0.181355556 | 0.881873999 |
| -0.2359      | -0.1815      | 0.881785709 |
| -0.170666667 | -0.181544444 | 0.881758544 |
| -0.3317      | -0.181577778 | 0.881738172 |
| -0.126533333 | -0.181611111 | 0.881717799 |
| 0.036        | -0.181688889 | 0.881670266 |
| -0.131833333 | -0.181711111 | 0.881656685 |
| -0.1254      | -0.181822222 | 0.881588786 |
| 0.036166667  | -0.181844444 | 0.881575207 |
| 0.163        | -0.182088889 | 0.881425849 |
| -0.051566667 | -0.182188889 | 0.881364755 |
| -0.1044      | -0.182188889 | 0.881364755 |
| 0.0595       | -0.182277778 | 0.881310453 |
| -0.015033333 | -0.182388889 | 0.881242581 |
| -0.554133333 | -0.1824      | 0.881235794 |
| -0.061066667 | -0.1824      | 0.881235794 |
| -0.056233333 | -0.182511111 | 0.881167927 |
| -0.104833333 | -0.182588889 | 0.881120423 |
| -0.182133333 | -0.182633333 | 0.881093279 |
| -0.267166667 | -0.1827      | 0.881052565 |
| -0.134966667 | -0.182722222 | 0.881038994 |
| -0.130833333 | -0.182766667 | 0.881011852 |
| -0.024733333 | -0.182788889 | 0.880998282 |
| -0.166833333 | -0.182855556 | 0.880957572 |
| -0.072266667 | -0.182866667 | 0.880950788 |
| -0.096166667 | -0.1829      | 0.880930433 |
| -0.1271      | -0.182966667 | 0.880889727 |
| -0.016133333 | -0.183044444 | 0.880842238 |
| -0.0433      | -0.183066667 | 0.88082867  |
| -0.009       | -0.183077778 | 0.880821886 |
| -0.064333333 | -0.1831      | 0.880808319 |

|              |              |             |
|--------------|--------------|-------------|
| 0.0692       | -0.183133333 | 0.880787968 |
| -0.044333333 | -0.183155556 | 0.880774401 |
| -0.127833333 | -0.183311111 | 0.880679439 |
| -0.021466667 | -0.183333333 | 0.880665874 |
| -0.0918      | -0.183466667 | 0.880584487 |
| -0.0934      | -0.183522222 | 0.880550577 |
| -0.110866667 | -0.183533333 | 0.880543796 |
| 0.0695       | -0.183566667 | 0.880523451 |
| -0.071833333 | -0.1836      | 0.880503107 |
| 0.041333333  | -0.183644444 | 0.880475982 |
| -0.186466667 | -0.183766667 | 0.880401393 |
| -0.0297      | -0.183855556 | 0.880347151 |
| -0.0574      | -0.184022222 | 0.880245455 |
| -0.115566667 | -0.184044444 | 0.880231896 |
| -0.0483      | -0.184077778 | 0.880211559 |
| -0.064666667 | -0.184155556 | 0.880164107 |
| -0.060733333 | -0.1842      | 0.880136992 |
| 0.011166667  | -0.184533333 | 0.879933661 |
| -0.1178      | -0.184555556 | 0.879920107 |
| -0.179566667 | -0.184566667 | 0.87991333  |
| -0.083833333 | -0.184633333 | 0.879872671 |
| -0.115166667 | -0.184633333 | 0.879872671 |
| -0.3038      | -0.184688889 | 0.879838789 |
| 0.061366667  | -0.1848      | 0.87977103  |
| -0.185766667 | -0.184833333 | 0.879750703 |
| 0.065666667  | -0.1849      | 0.879710051 |
| -0.189633333 | -0.184911111 | 0.879703275 |
| 0.227433333  | -0.185       | 0.879649076 |
| -0.042933333 | -0.185088889 | 0.87959488  |
| -0.273933333 | -0.185222222 | 0.879513592 |
| -0.027266667 | -0.185244444 | 0.879500044 |
| 0.0591       | -0.185288889 | 0.87947295  |
| 0.061533333  | -0.1853      | 0.879466177 |
| -0.122733333 | -0.185366667 | 0.879425538 |
| -0.3165      | -0.185533333 | 0.879323949 |
| 0.2098       | -0.185922222 | 0.879086952 |
| -0.074433333 | -0.186122222 | 0.878965094 |
| -0.1594      | -0.1862      | 0.878917709 |
| -0.123966667 | -0.186344444 | 0.878829715 |
| -0.2623      | -0.186366667 | 0.878816178 |
| -0.248666667 | -0.186411111 | 0.878789105 |
| -0.364633333 | -0.186633333 | 0.878653753 |
| 0.031666667  | -0.186688889 | 0.878619918 |
| 0.0062       | -0.186788889 | 0.878559019 |
| -0.042666667 | -0.186844444 | 0.878525188 |
| -0.2289      | -0.186855556 | 0.878518422 |
| -0.173333333 | -0.186911111 | 0.878484593 |

|              |              |             |
|--------------|--------------|-------------|
| 0.091366667  | -0.186944444 | 0.878464296 |
| -0.1272      | -0.187011111 | 0.878423703 |
| -0.273933333 | -0.187033333 | 0.878410172 |
| -0.178133333 | -0.187033333 | 0.878410172 |
| -0.735133333 | -0.187066667 | 0.878389877 |
| -0.118333333 | -0.187122222 | 0.878356053 |
| -0.060966667 | -0.187255556 | 0.878274879 |
| 0.0019       | -0.187277778 | 0.878261351 |
| 0.124666667  | -0.187388889 | 0.878193713 |
| -0.092333333 | -0.187511111 | 0.878119317 |
| -0.694133333 | -0.187588889 | 0.878071978 |
| -0.3101      | -0.1876      | 0.878065215 |
| -0.129566667 | -0.187633333 | 0.878044928 |
| -0.2867      | -0.187644444 | 0.878038165 |
| 0.004566667  | -0.187744444 | 0.877977307 |
| -0.2051      | -0.187744444 | 0.877977307 |
| -0.168166667 | -0.187944444 | 0.877855602 |
| -0.0702      | -0.188155556 | 0.877727153 |
| -0.200666667 | -0.188333333 | 0.877619001 |
| -0.0753      | -0.1884      | 0.877578447 |
| -0.128766667 | -0.188522222 | 0.877504104 |
| 0.106133333  | -0.188633333 | 0.877436524 |
| -0.022       | -0.188633333 | 0.877436524 |
| -0.0904      | -0.188733333 | 0.877375707 |
| 0.005633333  | -0.1888      | 0.877335165 |
| -0.233033333 | -0.188866667 | 0.877294624 |
| -0.037166667 | -0.189166667 | 0.877112215 |
| -0.197666667 | -0.189333333 | 0.877010893 |
| -0.129433333 | -0.189377778 | 0.876983876 |
| -0.1325      | -0.189422222 | 0.876956859 |
| -0.292       | -0.189466667 | 0.876929844 |
| -0.292633333 | -0.189477778 | 0.87692309  |
| -0.0755      | -0.189511111 | 0.876902829 |
| -0.009833333 | -0.189588889 | 0.876855555 |
| -0.244833333 | -0.189611111 | 0.876842049 |
| 0.0403       | -0.1899      | 0.876666485 |
| 0.002733333  | -0.189955556 | 0.876632727 |
| -0.1929      | -0.1903      | 0.876423455 |
| -0.266866667 | -0.190311111 | 0.876416705 |
| -0.06        | -0.190366667 | 0.876382957 |
| -0.166833333 | -0.1906      | 0.876241227 |
| -0.1919      | -0.190688889 | 0.876187241 |
| 0.008666667  | -0.190766667 | 0.876140006 |
| -0.041766667 | -0.190833333 | 0.87609952  |
| -0.141833333 | -0.190955556 | 0.876025302 |
| -0.299833333 | -0.191011111 | 0.875991568 |
| -0.092066667 | -0.191055556 | 0.875964583 |

|              |              |             |
|--------------|--------------|-------------|
| -0.0166      | -0.1911      | 0.875937598 |
| -0.068266667 | -0.191188889 | 0.87588363  |
| -0.1689      | -0.191344444 | 0.875789195 |
| -0.2801      | -0.191444444 | 0.875728492 |
| -0.2469      | -0.191533333 | 0.875674537 |
| -0.045566667 | -0.191533333 | 0.875674537 |
| -0.146466667 | -0.191611111 | 0.87562733  |
| -0.174033333 | -0.191622222 | 0.875620586 |
| -0.062933333 | -0.191633333 | 0.875613842 |
| -0.1661      | -0.191655556 | 0.875600355 |
| 0.033633333  | -0.191666667 | 0.875593611 |
| -0.036566667 | -0.191722222 | 0.875559895 |
| -0.051266667 | -0.191877778 | 0.875465494 |
| -0.066133333 | -0.192211111 | 0.875263242 |
| -0.1458      | -0.192333333 | 0.875189095 |
| -0.048       | -0.192411111 | 0.875141913 |
| 0.0412       | -0.192411111 | 0.875141913 |
| 0.211333333  | -0.1925      | 0.875087995 |
| -0.0213      | -0.192733333 | 0.874946474 |
| -0.068233333 | -0.192833333 | 0.87488583  |
| -0.04        | -0.192844444 | 0.874879092 |
| -0.176233333 | -0.192933333 | 0.874825189 |
| -0.0865      | -0.193177778 | 0.874676975 |
| -0.087466667 | -0.193277778 | 0.874616349 |
| -0.135466667 | -0.193344444 | 0.874575934 |
| -0.2325      | -0.1934      | 0.874542257 |
| 0.013833333  | -0.193411111 | 0.874535521 |
| -0.1579      | -0.193544444 | 0.874454701 |
| -0.075466667 | -0.193577778 | 0.874434497 |
| 0.114733333  | -0.1936      | 0.874421028 |
| -0.168566667 | -0.193677778 | 0.874373888 |
| -0.150766667 | -0.193777778 | 0.874313283 |
| -0.152333333 | -0.193877778 | 0.874252682 |
| 0.149966667  | -0.193911111 | 0.874232483 |
| 0.061266667  | -0.193966667 | 0.874198818 |
| 0.052        | -0.193977778 | 0.874192086 |
| -0.157833333 | -0.194233333 | 0.874037247 |
| -0.113166667 | -0.194244444 | 0.874030516 |
| -0.029033333 | -0.194266667 | 0.874017053 |
| 0.340933333  | -0.194377778 | 0.873949742 |
| -0.1335      | -0.194388889 | 0.873943011 |
| -0.028133333 | -0.194433333 | 0.873916088 |
| -0.061533333 | -0.194533333 | 0.873855515 |
| -0.2759      | -0.194566667 | 0.873835325 |
| -0.110833333 | -0.194611111 | 0.873808406 |
| -0.398733333 | -0.194788889 | 0.873700736 |
| -0.243966667 | -0.1948      | 0.873694007 |

|              |              |             |
|--------------|--------------|-------------|
| 0.1797       | -0.194822222 | 0.87368055  |
| 0.027        | -0.194855556 | 0.873660364 |
| -0.108266667 | -0.194988889 | 0.873579624 |
| -0.149966667 | -0.195       | 0.873572896 |
| -0.106266667 | -0.1951      | 0.873512347 |
| -0.0375      | -0.195233333 | 0.873431621 |
| -0.225233333 | -0.195255556 | 0.873418167 |
| -0.194066667 | -0.195266667 | 0.87341144  |
| -0.193433333 | -0.195266667 | 0.87341144  |
| 0.0437       | -0.195288889 | 0.873397987 |
| -0.0552      | -0.195311111 | 0.873384534 |
| -0.1971      | -0.1954      | 0.873330724 |
| -0.126966667 | -0.195422222 | 0.873317272 |
| -0.118466667 | -0.1957      | 0.873149139 |
| -0.1394      | -0.195777778 | 0.873102067 |
| -0.1464      | -0.195988889 | 0.872974314 |
| -0.124233333 | -0.1963      | 0.872786081 |
| -0.0835      | -0.196466667 | 0.872685259 |
| -0.2362      | -0.196744444 | 0.872517248 |
| -0.0585      | -0.196822222 | 0.87247021  |
| -0.092733333 | -0.196877778 | 0.872436614 |
| 0.030533333  | -0.196977778 | 0.872376143 |
| -0.031566667 | -0.1971      | 0.87230224  |
| -0.1065      | -0.197355556 | 0.872147736 |
| -0.032133333 | -0.197422222 | 0.872107436 |
| 0.1868       | -0.197433333 | 0.872100719 |
| 0.074033333  | -0.197511111 | 0.872053704 |
| -0.2325      | -0.197611111 | 0.87199326  |
| -0.115633333 | -0.197622222 | 0.871986544 |
| 0.008433333  | -0.1977      | 0.871939535 |
| -0.2919      | -0.197744444 | 0.871912674 |
| -0.0634      | -0.197788889 | 0.871885814 |
| -0.012633333 | -0.198088889 | 0.871704529 |
| -0.0741      | -0.198088889 | 0.871704529 |
| -0.170333333 | -0.198111111 | 0.871691102 |
| -0.095966667 | -0.198144444 | 0.871670962 |
| 0.0736       | -0.198155556 | 0.871664249 |
| -0.117766667 | -0.198177778 | 0.871650823 |
| 0.1031       | -0.198355556 | 0.871543419 |
| -0.267066667 | -0.198444444 | 0.871489722 |
| -0.1266      | -0.198677778 | 0.871348784 |
| -0.1175      | -0.198733333 | 0.871315231 |
| -0.047333333 | -0.198733333 | 0.871315231 |
| 0.0329       | -0.1988      | 0.871274968 |
| -0.077333333 | -0.198811111 | 0.871268258 |
| -0.157633333 | -0.198966667 | 0.87117432  |
| -0.024666667 | -0.198966667 | 0.87117432  |

|              |              |             |
|--------------|--------------|-------------|
| -0.086333333 | -0.199011111 | 0.871147483 |
| -0.279333333 | -0.199122222 | 0.871080393 |
| 0.023166667  | -0.199177778 | 0.87104685  |
| -0.189733333 | -0.1993      | 0.87097306  |
| 0.022433333  | -0.199455556 | 0.870879154 |
| -0.126066667 | -0.199766667 | 0.870691373 |
| -0.0312      | -0.199766667 | 0.870691373 |
| -0.059366667 | -0.199944444 | 0.870584087 |
| -0.122966667 | -0.200044444 | 0.870523745 |
| -0.3144      | -0.200111111 | 0.870483519 |
| 0.0056       | -0.200122222 | 0.870476815 |
| -0.1648      | -0.200255556 | 0.87039637  |
| 0.012233333  | -0.200466667 | 0.870269013 |
| -0.020466667 | -0.2005      | 0.870248906 |
| -0.087933333 | -0.2006      | 0.870188587 |
| 0.0417       | -0.200744444 | 0.870101467 |
| -0.103366667 | -0.200811111 | 0.87006126  |
| -0.511833333 | -0.201       | 0.869947353 |
| -0.101       | -0.201266667 | 0.869786567 |
| -0.065633333 | -0.201433333 | 0.869686091 |
| -0.151566667 | -0.201444444 | 0.869679393 |
| -0.043966667 | -0.2019      | 0.869404821 |
| -0.0431      | -0.202122222 | 0.869270914 |
| -0.338033333 | -0.202277778 | 0.869177192 |
| -0.0467      | -0.2023      | 0.869163804 |
| -0.3849      | -0.202377778 | 0.869116947 |
| 0.146666667  | -0.202411111 | 0.869096867 |
| 0.027266667  | -0.202677778 | 0.868936238 |
| 0.0709       | -0.202755556 | 0.868889394 |
| -0.143333333 | -0.202888889 | 0.868809095 |
| -0.180933333 | -0.203       | 0.868742185 |
| -0.072433333 | -0.2032      | 0.86862176  |
| -0.141266667 | -0.203344444 | 0.868534797 |
| -0.093266667 | -0.203466667 | 0.86846122  |
| -0.160733333 | -0.203488889 | 0.868447843 |
| -0.007333333 | -0.2035      | 0.868441154 |
| 0.061433333  | -0.203544444 | 0.868414401 |
| -0.038733333 | -0.203577778 | 0.868394337 |
| -0.0586      | -0.203611111 | 0.868374273 |
| -0.018833333 | -0.203777778 | 0.86827396  |
| -0.067166667 | -0.203822222 | 0.868247212 |
| -0.1187      | -0.204011111 | 0.868133542 |
| -0.165866667 | -0.204011111 | 0.868133542 |
| -0.0481      | -0.204066667 | 0.868100112 |
| 0.083133333  | -0.204133333 | 0.868059998 |
| 0.011666667  | -0.204144444 | 0.868053313 |
| 0.013733333  | -0.204155556 | 0.868046627 |

|              |              |             |
|--------------|--------------|-------------|
| -0.107033333 | -0.204211111 | 0.868013201 |
| 0.051        | -0.204255556 | 0.867986461 |
| -0.135333333 | -0.204277778 | 0.867973091 |
| -0.477933333 | -0.204355556 | 0.867926299 |
| -0.0171      | -0.204488889 | 0.867846089 |
| 0.0322       | -0.204666667 | 0.867739154 |
| 0.098166667  | -0.204744444 | 0.867692374 |
| -0.097233333 | -0.204755556 | 0.867685692 |
| 0.002233333  | -0.204811111 | 0.867652228 |
| -0.002933333 | -0.205022222 | 0.867525324 |
| -0.044166667 | -0.205044444 | 0.867511962 |
| -0.224933333 | -0.205055556 | 0.86750528  |
| -0.233433333 | -0.205088889 | 0.867485237 |
| 0.2225       | -0.2051      | 0.867478556 |
| -0.044866667 | -0.205122222 | 0.867465194 |
| -0.026333333 | -0.205144444 | 0.867451832 |
| -0.258633333 | -0.205344444 | 0.867331586 |
| -0.0349      | -0.2057      | 0.867117857 |
| -0.139366667 | -0.205755556 | 0.867084466 |
| 0.046533333  | -0.205933333 | 0.866977625 |
| 0.033766667  | -0.206022222 | 0.86692421  |
| -0.1664      | -0.206066667 | 0.866897503 |
| -0.0748      | -0.206144444 | 0.866850769 |
| -0.133033333 | -0.206155556 | 0.866844093 |
| -0.078266667 | -0.206233333 | 0.866797361 |
| -0.0197      | -0.206266667 | 0.866777334 |
| -0.248666667 | -0.2064      | 0.866697231 |
| -0.0789      | -0.206433333 | 0.866677206 |
| 0.0035       | -0.206711111 | 0.866510351 |
| 0.0157       | -0.206722222 | 0.866503678 |
| -0.2097      | -0.206777778 | 0.866470311 |
| -0.214333333 | -0.206822222 | 0.866443618 |
| -0.174766667 | -0.206833333 | 0.866436945 |
| -0.430566667 | -0.206855556 | 0.866423599 |
| -0.1209      | -0.206944444 | 0.866370218 |
| -0.2239      | -0.207211111 | 0.866210094 |
| -0.0985      | -0.207211111 | 0.866210094 |
| -0.209033333 | -0.2073      | 0.866156725 |
| -0.281633333 | -0.207411111 | 0.86609002  |
| -0.1011      | -0.207422222 | 0.866083349 |
| 0.005466667  | -0.207433333 | 0.866076679 |
| -0.143633333 | -0.207588889 | 0.865983301 |
| 0.0058       | -0.2076      | 0.865976632 |
| -0.029866667 | -0.207644444 | 0.865949955 |
| -0.025266667 | -0.207744444 | 0.865889934 |
| -0.164766667 | -0.207833333 | 0.865836585 |
| -0.033066667 | -0.207888889 | 0.865803244 |

|              |              |             |
|--------------|--------------|-------------|
| -0.360766667 | -0.207922222 | 0.86578324  |
| 0.0555       | -0.208211111 | 0.865609891 |
| -0.079166667 | -0.208233333 | 0.865596558 |
| 0.030266667  | -0.208266667 | 0.865576558 |
| -0.009       | -0.208266667 | 0.865576558 |
| -0.244       | -0.2083      | 0.865556559 |
| -0.009233333 | -0.208388889 | 0.865503231 |
| -0.1749      | -0.208388889 | 0.865503231 |
| -0.092066667 | -0.208477778 | 0.865449907 |
| -0.023733333 | -0.208477778 | 0.865449907 |
| 0.118        | -0.208511111 | 0.865429911 |
| -0.272533333 | -0.208844444 | 0.865229977 |
| -0.112233333 | -0.208955556 | 0.865163343 |
| -0.1708      | -0.209       | 0.865136691 |
| 0.028766667  | -0.209155556 | 0.865043414 |
| 3.33E-05     | -0.209155556 | 0.865043414 |
| -0.158933333 | -0.209166667 | 0.865036752 |
| -0.096666667 | -0.209266667 | 0.864976794 |
| -0.136366667 | -0.2093      | 0.864956809 |
| -0.111266667 | -0.209311111 | 0.864950148 |
| -0.254033333 | -0.209422222 | 0.864883535 |
| -0.171766667 | -0.209533333 | 0.864816927 |
| -0.165066667 | -0.209633333 | 0.864756985 |
| -0.031833333 | -0.209755556 | 0.864683727 |
| -0.1103      | -0.209766667 | 0.864677068 |
| -0.030266667 | -0.209777778 | 0.864670409 |
| -0.4543      | -0.209788889 | 0.864663749 |
| -0.085966667 | -0.209922222 | 0.864583841 |
| 0.0828       | -0.210788889 | 0.864064618 |
| 0.0046       | -0.210955556 | 0.863964803 |
| -0.162333333 | -0.210955556 | 0.863964803 |
| -0.266033333 | -0.211033333 | 0.863918226 |
| -0.189033333 | -0.211277778 | 0.86377186  |
| -0.091366667 | -0.211288889 | 0.863765208 |
| -0.0206      | -0.211755556 | 0.863485852 |
| -0.1621      | -0.211933333 | 0.863379454 |
| -0.140066667 | -0.212166667 | 0.863239827 |
| -0.2967      | -0.212288889 | 0.863166699 |
| -0.167       | -0.212322222 | 0.863146755 |
| -0.1233      | -0.212711111 | 0.862914119 |
| 0.196466667  | -0.212777778 | 0.862874245 |
| -0.052433333 | -0.213044444 | 0.862714767 |
| -0.101733333 | -0.213255556 | 0.862588534 |
| 0.019533333  | -0.213255556 | 0.862588534 |
| 0.0557       | -0.213344444 | 0.862535389 |
| -0.168333333 | -0.213433333 | 0.862482247 |
| 0.025533333  | -0.213488889 | 0.862449035 |



|              |              |             |
|--------------|--------------|-------------|
| -0.061733333 | -0.213577778 | 0.862395899 |
| -0.087       | -0.213722222 | 0.862309559 |
| -0.2211      | -0.213755556 | 0.862289636 |
| -0.077366667 | -0.213766667 | 0.862282995 |
| -0.229066667 | -0.213977778 | 0.862156825 |
| 0.117533333  | -0.214133333 | 0.86206387  |
| -0.082866667 | -0.214188889 | 0.862030674 |
| -0.196766667 | -0.214266667 | 0.861984202 |
| 0.0238       | -0.214388889 | 0.861911179 |
| -0.131066667 | -0.214522222 | 0.861831525 |
| -0.110533333 | -0.214622222 | 0.86177179  |
| -0.1292      | -0.214633333 | 0.861765153 |
| -0.087166667 | -0.214722222 | 0.861712059 |
| -0.327533333 | -0.215088889 | 0.861493079 |
| -0.063933333 | -0.215244444 | 0.861400195 |
| 0.084333333  | -0.215244444 | 0.861400195 |
| 0.385766667  | -0.215255556 | 0.861393561 |
| -0.2339      | -0.215277778 | 0.861380293 |
| -0.069266667 | -0.215311111 | 0.861360391 |
| -0.070266667 | -0.215322222 | 0.861353757 |
| -0.200066667 | -0.2155      | 0.861247622 |
| -0.131133333 | -0.215833333 | 0.861048655 |
| 0.014233333  | -0.215888889 | 0.861015498 |
| 0.239233333  | -0.216       | 0.860949188 |
| -0.2802      | -0.216155556 | 0.860856363 |
| -0.0814      | -0.216155556 | 0.860856363 |
| 0.008833333  | -0.216155556 | 0.860856363 |
| -0.184466667 | -0.216166667 | 0.860849733 |
| -0.2051      | -0.216211111 | 0.860823214 |
| -0.0482      | -0.216288889 | 0.860776807 |
| -0.138766667 | -0.216288889 | 0.860776807 |
| -0.031633333 | -0.216411111 | 0.860703887 |
| -0.3059      | -0.216511111 | 0.860644229 |
| -0.5411      | -0.216722222 | 0.8605183   |
| -0.0513      | -0.216955556 | 0.860379136 |
| -0.005966667 | -0.217155556 | 0.86025987  |
| 0.1452       | -0.217311111 | 0.860167119 |
| -0.0821      | -0.2174      | 0.860114123 |
| -0.128733333 | -0.217411111 | 0.860107499 |
| -0.075166667 | -0.217433333 | 0.860094251 |
| -0.198666667 | -0.217433333 | 0.860094251 |
| -0.308366667 | -0.217455556 | 0.860081002 |
| -0.249633333 | -0.217577778 | 0.860008141 |
| -0.2554      | -0.217677778 | 0.859948532 |
| -0.250866667 | -0.2177      | 0.859935286 |
| -0.017033333 | -0.2178      | 0.859875682 |
| -0.056366667 | -0.218155556 | 0.85966379  |

|              |              |             |
|--------------|--------------|-------------|
| -0.1914      | -0.218222222 | 0.859624066 |
| -0.112566667 | -0.218244444 | 0.859610825 |
| 0.162533333  | -0.218566667 | 0.859418854 |
| -0.242866667 | -0.218777778 | 0.859293104 |
| -0.1456      | -0.218866667 | 0.859240162 |
| -0.0135      | -0.218888889 | 0.859226927 |
| 0.014666667  | -0.218966667 | 0.859180606 |
| -0.099533333 | -0.219266667 | 0.859001963 |
| -0.0579      | -0.219422222 | 0.858909348 |
| -0.130333333 | -0.219622222 | 0.858790286 |
| -0.164666667 | -0.219633333 | 0.858783672 |
| -0.173733333 | -0.219688889 | 0.858750602 |
| 0.097366667  | -0.219722222 | 0.858730761 |
| -0.0142      | -0.2198      | 0.858684467 |
| 0.112433333  | -0.219855556 | 0.858651401 |
| -0.139833333 | -0.219988889 | 0.858572049 |
| -0.111766667 | -0.220022222 | 0.858552212 |
| -0.094966667 | -0.220022222 | 0.858552212 |
| -0.243133333 | -0.220188889 | 0.858453034 |
| 0.085        | -0.220355556 | 0.858353867 |
| -0.1322      | -0.220422222 | 0.858314204 |
| -0.196333333 | -0.220455556 | 0.858294373 |
| -0.046033333 | -0.2205      | 0.858267932 |
| -0.418766667 | -0.220733333 | 0.858129132 |
| -0.056533333 | -0.221044444 | 0.8579441   |
| -0.0208      | -0.221055556 | 0.857937492 |
| -0.119866667 | -0.221155556 | 0.857878027 |
| -0.440733333 | -0.221155556 | 0.857878027 |
| -0.1957      | -0.221544444 | 0.85764681  |
| -0.102333333 | -0.221555556 | 0.857640205 |
| -0.1546      | -0.221677778 | 0.857567551 |
| -0.0804      | -0.221711111 | 0.857547737 |
| -0.0518      | -0.221811111 | 0.857488298 |
| -0.4684      | -0.221955556 | 0.85740245  |
| -0.194933333 | -0.222288889 | 0.857204371 |
| -0.2167      | -0.222288889 | 0.857204371 |
| -0.140366667 | -0.2223      | 0.857197769 |
| -0.0017      | -0.222388889 | 0.857144956 |
| 0.045533333  | -0.222455556 | 0.857105348 |
| -0.083966667 | -0.222566667 | 0.85703934  |
| -0.0817      | -0.222644444 | 0.856993137 |
| -0.348666667 | -0.222655556 | 0.856986536 |
| -0.3486      | -0.222866667 | 0.856861142 |
| -0.250166667 | -0.222911111 | 0.856834745 |
| -0.138266667 | -0.222944444 | 0.856814949 |
| -0.0582      | -0.223066667 | 0.856742364 |
| 0.040766667  | -0.223088889 | 0.856729167 |

|              |              |             |
|--------------|--------------|-------------|
| -0.060733333 | -0.223144444 | 0.856696177 |
| -0.231233333 | -0.223477778 | 0.856498261 |
| -0.091966667 | -0.223611111 | 0.856419107 |
| -0.1705      | -0.223666667 | 0.856386129 |
| -0.0378      | -0.223688889 | 0.856372938 |
| -0.0915      | -0.223777778 | 0.856320176 |
| -0.212333333 | -0.224055556 | 0.856155315 |
| -0.154266667 | -0.224122222 | 0.856115753 |
| -0.1196      | -0.224133333 | 0.85610916  |
| -0.229933333 | -0.224288889 | 0.856016856 |
| -0.078366667 | -0.224422222 | 0.855937747 |
| -0.1835      | -0.224455556 | 0.855917971 |
| -0.1565      | -0.2247      | 0.85577296  |
| -0.0602      | -0.224877778 | 0.855667513 |
| -0.1269      | -0.224888889 | 0.855660923 |
| 0.103633333  | -0.225066667 | 0.85555549  |
| -0.182733333 | -0.225133333 | 0.855515956 |
| -0.141366667 | -0.225133333 | 0.855515956 |
| 0.037166667  | -0.225155556 | 0.855502778 |
| 0.0251       | -0.2253      | 0.855417128 |
| -0.0201      | -0.225355556 | 0.855384188 |
| -0.077       | -0.225388889 | 0.855364425 |
| -0.040033333 | -0.225477778 | 0.855311725 |
| -0.009866667 | -0.225766667 | 0.855140472 |
| -0.053633333 | -0.225788889 | 0.8551273   |
| -0.178233333 | -0.225866667 | 0.855081201 |
| -0.212666667 | -0.225988889 | 0.855008763 |
| 0.113133333  | -0.226011111 | 0.854995593 |
| -0.182       | -0.226022222 | 0.854989008 |
| 0.2263       | -0.2261      | 0.854942916 |
| -0.1179      | -0.226333333 | 0.854804653 |
| -0.080366667 | -0.226511111 | 0.854699325 |
| -0.110566667 | -0.2266      | 0.854646666 |
| -0.0974      | -0.226611111 | 0.854640084 |
| -0.1915      | -0.226733333 | 0.854567684 |
| -0.108766667 | -0.226833333 | 0.854508452 |
| -0.190766667 | -0.226844444 | 0.854501871 |
| -0.131333333 | -0.227111111 | 0.85434394  |
| -0.1645      | -0.227388889 | 0.85417946  |
| 0.066766667  | -0.227677778 | 0.854008434 |
| -0.0953      | -0.227866667 | 0.853896628 |
| -0.1444      | -0.227955556 | 0.853844018 |
| 0.026566667  | -0.228055556 | 0.853784836 |
| 0.196666667  | -0.228077778 | 0.853771685 |
| -0.4408      | -0.2282      | 0.853699358 |
| -0.041933333 | -0.228611111 | 0.853456122 |
| -0.075166667 | -0.228766667 | 0.853364105 |

|              |              |             |
|--------------|--------------|-------------|
| -0.151466667 | -0.228788889 | 0.853350961 |
| -0.057233333 | -0.228855556 | 0.853311528 |
| -0.079733333 | -0.228866667 | 0.853304957 |
| -0.097466667 | -0.2291      | 0.853166959 |
| -0.0033      | -0.229144444 | 0.853140676 |
| -0.1153      | -0.229166667 | 0.853127535 |
| -0.153166667 | -0.229244444 | 0.853081543 |
| -0.022833333 | -0.229322222 | 0.853035554 |
| -0.1137      | -0.229388889 | 0.852996136 |
| -0.111466667 | -0.229588889 | 0.852877894 |
| 0.071533333  | -0.229744444 | 0.852785939 |
| -0.111933333 | -0.229766667 | 0.852772803 |
| -0.1257      | -0.229788889 | 0.852759668 |
| -0.866966667 | -0.2298      | 0.8527531   |
| -0.2111      | -0.229844444 | 0.85272683  |
| -0.349866667 | -0.229866667 | 0.852713696 |
| -0.208166667 | -0.229866667 | 0.852713696 |
| -0.153066667 | -0.2299      | 0.852693994 |
| -0.080633333 | -0.229933333 | 0.852674293 |
| 0.0185       | -0.230177778 | 0.852529831 |
| -0.100033333 | -0.2302      | 0.8525167   |
| 0.059366667  | -0.230388889 | 0.852405089 |
| 0.0007       | -0.2304      | 0.852398524 |
| 0.0329       | -0.230511111 | 0.852332878 |
| -0.117633333 | -0.230611111 | 0.852273801 |
| -0.089733333 | -0.2315      | 0.85174885  |
| -0.127633333 | -0.231655556 | 0.851657017 |
| -0.2435      | -0.231833333 | 0.851552077 |
| -0.1078      | -0.231944444 | 0.851486496 |
| -0.063366667 | -0.231944444 | 0.851486496 |
| -0.155733333 | -0.231955556 | 0.851479938 |
| -0.061       | -0.232022222 | 0.851440593 |
| -0.0884      | -0.232044444 | 0.851427478 |
| -0.0615      | -0.232233333 | 0.85131601  |
| -0.157166667 | -0.2324      | 0.851217667 |
| 0.169833333  | -0.232455556 | 0.851184889 |
| -0.094866667 | -0.232488889 | 0.851165223 |
| -0.039233333 | -0.2325      | 0.851158668 |
| 0.189733333  | -0.2325      | 0.851158668 |
| -0.1281      | -0.232611111 | 0.851093117 |
| -0.021866667 | -0.232744444 | 0.851014463 |
| -0.569033333 | -0.232811111 | 0.850975139 |
| -0.2184      | -0.232811111 | 0.850975139 |
| -0.207266667 | -0.232922222 | 0.850909602 |
| -0.042266667 | -0.233       | 0.85086373  |
| -0.1423      | -0.233       | 0.85086373  |
| 0.0127       | -0.233033333 | 0.850844071 |

|              |              |             |
|--------------|--------------|-------------|
| 0.026166667  | -0.233066667 | 0.850824412 |
| -0.0464      | -0.233188889 | 0.850752335 |
| -0.046766667 | -0.233222222 | 0.850732679 |
| 0.143033333  | -0.233277778 | 0.850699919 |
| -0.177266667 | -0.233277778 | 0.850699919 |
| -0.2878      | -0.233455556 | 0.850595097 |
| -0.0569      | -0.233477778 | 0.850581995 |
| -0.059866667 | -0.233633333 | 0.850490288 |
| -0.1846      | -0.233766667 | 0.85041169  |
| -0.132433333 | -0.233811111 | 0.850385492 |
| -0.045233333 | -0.233944444 | 0.850306903 |
| -0.186033333 | -0.233977778 | 0.850287257 |
| -0.080866667 | -0.234044444 | 0.850247966 |
| -0.030166667 | -0.234077778 | 0.850228322 |
| -0.141733333 | -0.2341      | 0.850215226 |
| -0.023166667 | -0.234188889 | 0.850162843 |
| -0.1082      | -0.234311111 | 0.850090822 |
| -0.102933333 | -0.234388889 | 0.850044993 |
| 0.1485       | -0.234611111 | 0.849914069 |
| -0.020566667 | -0.234633333 | 0.849900977 |
| -0.3142      | -0.234755556 | 0.849828979 |
| 0.129266667  | -0.234855556 | 0.849770075 |
| -0.1879      | -0.234866667 | 0.84976353  |
| 0.066266667  | -0.234866667 | 0.84976353  |
| 0.015566667  | -0.2349      | 0.849743897 |
| -0.1859      | -0.235033333 | 0.849665367 |
| -0.1625      | -0.235177778 | 0.849580302 |
| -0.247733333 | -0.235277778 | 0.849521416 |
| -0.165433333 | -0.235311111 | 0.849501788 |
| -0.0433      | -0.235311111 | 0.849501788 |
| -0.271166667 | -0.235377778 | 0.849462533 |
| -0.2263      | -0.235388889 | 0.849455991 |
| -0.148633333 | -0.2357      | 0.849272829 |
| 0.024233333  | -0.235744444 | 0.849246667 |
| -0.207466667 | -0.235811111 | 0.849207424 |
| 0.042366667  | -0.236033333 | 0.849076628 |
| -0.067266667 | -0.2361      | 0.849037394 |
| -0.147333333 | -0.2363      | 0.8489197   |
| -0.124       | -0.2366      | 0.848743191 |
| -0.230666667 | -0.236666667 | 0.848703971 |
| -0.401433333 | -0.236766667 | 0.848645146 |
| -0.022566667 | -0.236811111 | 0.848619002 |
| 0.104333333  | -0.236811111 | 0.848619002 |
| -0.0487      | -0.2369      | 0.848566718 |
| 0.129866667  | -0.236977778 | 0.848520972 |
| -0.0935      | -0.237088889 | 0.848455624 |
| 0.0285       | -0.237177778 | 0.84840335  |

|              |              |             |
|--------------|--------------|-------------|
| -0.1232      | -0.237233333 | 0.84837068  |
| -0.153633333 | -0.237255556 | 0.848357612 |
| 0.1947       | -0.2374      | 0.848272678 |
| -0.036       | -0.237433333 | 0.848253079 |
| -0.073066667 | -0.237522222 | 0.848200817 |
| -0.1728      | -0.237733333 | 0.848076708 |
| 0.007866667  | -0.237766667 | 0.848057114 |
| -0.194       | -0.237777778 | 0.848050582 |
| -0.043833333 | -0.237822222 | 0.848024457 |
| -0.123933333 | -0.237833333 | 0.848017926 |
| -0.072833333 | -0.238044444 | 0.847893844 |
| -0.0489      | -0.238122222 | 0.847848134 |
| -0.087266667 | -0.238155556 | 0.847828544 |
| -0.0476      | -0.238266667 | 0.84776325  |
| -0.0573      | -0.238377778 | 0.847697961 |
| -0.252733333 | -0.238433333 | 0.847665318 |
| 0.0471       | -0.238455556 | 0.847652262 |
| 0.059366667  | -0.238533333 | 0.847606565 |
| -0.5073      | -0.238577778 | 0.847580453 |
| 0.015166667  | -0.238677778 | 0.847521706 |
| -0.1023      | -0.239144444 | 0.847247603 |
| -0.1878      | -0.239144444 | 0.847247603 |
| -0.298933333 | -0.239188889 | 0.847221503 |
| -0.353333333 | -0.239366667 | 0.847117109 |
| -0.040433333 | -0.239511111 | 0.847032299 |
| -0.1491      | -0.239511111 | 0.847032299 |
| -0.027933333 | -0.239511111 | 0.847032299 |
| -0.121333333 | -0.239522222 | 0.847025776 |
| 0.000366667  | -0.239544444 | 0.847012729 |
| -0.185566667 | -0.240055556 | 0.846712706 |
| -0.301566667 | -0.240066667 | 0.846706185 |
| -0.208333333 | -0.2401      | 0.846686622 |
| -0.293433333 | -0.240166667 | 0.846647498 |
| -0.174233333 | -0.240211111 | 0.846621416 |
| 0.0121       | -0.240255556 | 0.846595335 |
| 0.109466667  | -0.240455556 | 0.84647798  |
| -0.049       | -0.240622222 | 0.846380197 |
| -0.073033333 | -0.240633333 | 0.846373678 |
| -0.111733333 | -0.240666667 | 0.846354123 |
| -0.1632      | -0.240833333 | 0.846256354 |
| -0.151       | -0.241044444 | 0.84613253  |
| 0.089533333  | -0.2414      | 0.845924024 |
| -0.022233333 | -0.241533333 | 0.845845848 |
| -0.189833333 | -0.241688889 | 0.845754651 |
| -0.1496      | -0.241744444 | 0.845722083 |
| 0.095133333  | -0.241788889 | 0.84569603  |
| -0.051933333 | -0.2418      | 0.845689517 |

|              |              |             |
|--------------|--------------|-------------|
| -0.203266667 | -0.242055556 | 0.845539727 |
| -0.205033333 | -0.242533333 | 0.845259755 |
| -0.204533333 | -0.242644444 | 0.845194659 |
| -0.107233333 | -0.242655556 | 0.84518815  |
| 0.080833333  | -0.242877778 | 0.845057973 |
| 0.0275       | -0.242966667 | 0.845005908 |
| -0.0711      | -0.243011111 | 0.844979877 |
| -0.039733333 | -0.243233333 | 0.844849732 |
| -0.095766667 | -0.243422222 | 0.844739125 |
| -0.2693      | -0.243477778 | 0.844706596 |
| -0.139233333 | -0.243522222 | 0.844680574 |
| -0.1136      | -0.243788889 | 0.844524459 |
| -0.188133333 | -0.244022222 | 0.844387881 |
| -0.025733333 | -0.244022222 | 0.844387881 |
| -0.314466667 | -0.244122222 | 0.844329355 |
| 0.003033333  | -0.244655556 | 0.844017282 |
| 0.025033333  | -0.2448      | 0.843932782 |
| -0.2268      | -0.244855556 | 0.843900284 |
| -0.3633      | -0.244888889 | 0.843880786 |
| -0.174866667 | -0.2451      | 0.843757309 |
| 0.0551       | -0.245544444 | 0.843497417 |
| -0.464166667 | -0.245566667 | 0.843484424 |
| -0.0836      | -0.245966667 | 0.843250593 |
| -0.1263      | -0.246144444 | 0.843146689 |
| -0.008466667 | -0.246166667 | 0.843133702 |
| -0.147066667 | -0.246288889 | 0.843062276 |
| -0.157166667 | -0.246966667 | 0.842666299 |
| -0.089833333 | -0.247055556 | 0.842614381 |
| -0.005066667 | -0.2472      | 0.842530022 |
| 0.0452       | -0.247244444 | 0.842504067 |
| -0.410066667 | -0.247311111 | 0.842465136 |
| 0.0221       | -0.247722222 | 0.842225101 |
| 0.103433333  | -0.247755556 | 0.842205641 |
| -0.155       | -0.247911111 | 0.842114837 |
| -0.402366667 | -0.248055556 | 0.842030528 |
| -0.2369      | -0.248066667 | 0.842024043 |
| -0.282633333 | -0.248244444 | 0.84192029  |
| -0.352       | -0.248322222 | 0.841874902 |
| -0.074633333 | -0.248477778 | 0.841784134 |
| -0.090466667 | -0.248733333 | 0.841635035 |
| -0.0887      | -0.248855556 | 0.841563736 |
| -0.621533333 | -0.248877778 | 0.841550774 |
| -0.053266667 | -0.248977778 | 0.841492444 |
| 0.014266667  | -0.249011111 | 0.841473002 |
| 0.015833333  | -0.2491      | 0.841421157 |
| -0.2543      | -0.249155556 | 0.841388756 |
| -0.042366667 | -0.249266667 | 0.841323958 |

|              |              |             |
|--------------|--------------|-------------|
| -0.1701      | -0.249333333 | 0.841285082 |
| -0.084366667 | -0.249411111 | 0.841239728 |
| -0.037466667 | -0.249666667 | 0.841090726 |
| 0.141566667  | -0.2498      | 0.841012996 |
| -0.0551      | -0.249877778 | 0.840967657 |
| -0.109233333 | -0.249966667 | 0.840915844 |
| -0.108866667 | -0.2503      | 0.840721574 |
| -0.185733333 | -0.250611111 | 0.840540295 |
| -0.068333333 | -0.250966667 | 0.840333168 |
| -0.079733333 | -0.250977778 | 0.840326696 |
| -0.576233333 | -0.251044444 | 0.840287865 |
| -0.3056      | -0.251333333 | 0.840119621 |
| -0.1236      | -0.251388889 | 0.84008727  |
| 0.023366667  | -0.251411111 | 0.84007433  |
| -0.346033333 | -0.251444444 | 0.840054921 |
| -0.0289      | -0.251611111 | 0.839957879 |
| -0.040166667 | -0.251955556 | 0.839757363 |
| 0.0725       | -0.252377778 | 0.839511633 |
| 0.012233333  | -0.252444444 | 0.839472841 |
| -0.047333333 | -0.252488889 | 0.83944698  |
| -0.091133333 | -0.2526      | 0.839382331 |
| -0.016266667 | -0.252633333 | 0.839362937 |
| 0.050633333  | -0.252911111 | 0.839201341 |
| -0.042633333 | -0.253022222 | 0.839136712 |
| -0.117666667 | -0.253266667 | 0.838994544 |
| -0.022566667 | -0.253322222 | 0.838962236 |
| -0.030666667 | -0.253344444 | 0.838949313 |
| -0.189933333 | -0.253433333 | 0.838897625 |
| -0.3996      | -0.253522222 | 0.838845939 |
| -0.123733333 | -0.253577778 | 0.838813638 |
| -0.003866667 | -0.253722222 | 0.838729659 |
| -0.233933333 | -0.253855556 | 0.838652147 |
| -0.0096      | -0.2539      | 0.838626312 |
| -0.566433333 | -0.253977778 | 0.838581101 |
| -0.0981      | -0.254011111 | 0.838561726 |
| 0.223566667  | -0.2541      | 0.838510061 |
| 0.052133333  | -0.254333333 | 0.838374456 |
| -0.102733333 | -0.254366667 | 0.838355086 |
| -0.134333333 | -0.254466667 | 0.838296978 |
| -0.275433333 | -0.2545      | 0.838277609 |
| -0.1686      | -0.254588889 | 0.838225962 |
| -0.3462      | -0.2546      | 0.838219506 |
| -0.045033333 | -0.254944444 | 0.838019405 |
| -0.1415      | -0.254955556 | 0.838012951 |
| -0.1638      | -0.255288889 | 0.837819351 |
| -0.375333333 | -0.255344444 | 0.837787089 |
| -0.258433333 | -0.255455556 | 0.837722568 |



|              |              |             |
|--------------|--------------|-------------|
| -0.201333333 | -0.255488889 | 0.837703212 |
| -0.0319      | -0.255622222 | 0.837625796 |
| -0.1282      | -0.255688889 | 0.83758709  |
| -0.0272      | -0.255966667 | 0.837425836 |
| -0.311666667 | -0.256144444 | 0.83732265  |
| -0.183       | -0.256477778 | 0.837129209 |
| -0.155066667 | -0.256711111 | 0.836993828 |
| 0.0407       | -0.256811111 | 0.836935814 |
| -0.084733333 | -0.256911111 | 0.836877804 |
| -0.110533333 | -0.257266667 | 0.836671579 |
| -0.418733333 | -0.257511111 | 0.836529828 |
| -0.480033333 | -0.257566667 | 0.836497616 |
| -0.209866667 | -0.257744444 | 0.836394544 |
| -0.067366667 | -0.257755556 | 0.836388102 |
| -0.0863      | -0.257844444 | 0.836336571 |
| -0.101033333 | -0.257977778 | 0.836259281 |
| -0.165666667 | -0.258344444 | 0.836046769 |
| -0.382466667 | -0.258355556 | 0.83604033  |
| -0.0605      | -0.258433333 | 0.83599526  |
| -0.055733333 | -0.258511111 | 0.835950191 |
| -0.171733333 | -0.258611111 | 0.835892249 |
| -0.117533333 | -0.258622222 | 0.835885812 |
| 0.014133333  | -0.258822222 | 0.835769941 |
| -0.204933333 | -0.259088889 | 0.835615472 |
| -0.009       | -0.259222222 | 0.835538249 |
| -0.4928      | -0.259344444 | 0.835467467 |
| 0.307166667  | -0.259566667 | 0.835338787 |
| -0.105633333 | -0.259755556 | 0.835229425 |
| -0.1628      | -0.259822222 | 0.83519083  |
| -0.1727      | -0.259888889 | 0.835152237 |
| -0.060133333 | -0.259966667 | 0.835107214 |
| -0.042633333 | -0.260044444 | 0.835062194 |
| -0.124133333 | -0.260111111 | 0.835023606 |
| 0.0085       | -0.260211111 | 0.834965729 |
| -0.7369      | -0.260255556 | 0.834940007 |
| -0.2941      | -0.260311111 | 0.834907856 |
| -0.3283      | -0.260311111 | 0.834907856 |
| -0.2579      | -0.260377778 | 0.834869276 |
| -0.2262      | -0.2604      | 0.834856416 |
| -0.0695      | -0.2605      | 0.83479855  |
| -0.229266667 | -0.260611111 | 0.834734259 |
| -0.1263      | -0.260711111 | 0.834676402 |
| -0.1352      | -0.260766667 | 0.834644261 |
| -0.3088      | -0.261055556 | 0.834477146 |
| -0.145033333 | -0.261066667 | 0.83447072  |
| 0.2296       | -0.261255556 | 0.834361471 |
| 0.150133333  | -0.261433333 | 0.834258662 |

|              |              |             |
|--------------|--------------|-------------|
| -0.075266667 | -0.261611111 | 0.834155866 |
| -0.3782      | -0.261644444 | 0.834136593 |
| -0.136833333 | -0.261677778 | 0.834117321 |
| 0.036966667  | -0.261744444 | 0.834078777 |
| -0.142866667 | -0.261833333 | 0.834027389 |
| -0.150666667 | -0.262122222 | 0.833860398 |
| -0.0208      | -0.262277778 | 0.833770493 |
| 0.123233333  | -0.262344444 | 0.833731966 |
| -0.054666667 | -0.262511111 | 0.833635655 |
| -0.0367      | -0.262544444 | 0.833616394 |
| -0.0292      | -0.262555556 | 0.833609974 |
| 0.025033333  | -0.262777778 | 0.833481581 |
| -0.042       | -0.262811111 | 0.833462323 |
| -0.103133333 | -0.262866667 | 0.833430229 |
| -0.140333333 | -0.262888889 | 0.833417391 |
| -0.144233333 | -0.263077778 | 0.833308281 |
| -0.204833333 | -0.263122222 | 0.83328261  |
| -0.065966667 | -0.263155556 | 0.833263357 |
| -0.030833333 | -0.263233333 | 0.833218436 |
| -0.091533333 | -0.2633      | 0.833179934 |
| 0.137233333  | -0.263344444 | 0.833154267 |
| -0.048233333 | -0.263433333 | 0.833102936 |
| -0.044466667 | -0.263488889 | 0.833070855 |
| -0.142833333 | -0.2635      | 0.833064439 |
| -0.096666667 | -0.263777778 | 0.832904055 |
| -0.066266667 | -0.263977778 | 0.832788598 |
| -0.111133333 | -0.264244444 | 0.832634681 |
| -0.179133333 | -0.264277778 | 0.832615443 |
| 0.0228       | -0.264344444 | 0.832576969 |
| -0.064133333 | -0.264455556 | 0.832512849 |
| -0.204166667 | -0.264466667 | 0.832506438 |
| -0.003266667 | -0.264622222 | 0.832416679 |
| 0.0647       | -0.264688889 | 0.832378214 |
| -0.180133333 | -0.264877778 | 0.83226924  |
| -0.030766667 | -0.2651      | 0.832141053 |
| -0.348433333 | -0.265155556 | 0.832109009 |
| -0.1105      | -0.265366667 | 0.831987255 |
| -0.059366667 | -0.265488889 | 0.831916774 |
| 0.0429       | -0.265555556 | 0.831878332 |
| -0.2187      | -0.265566667 | 0.831871925 |
| -0.2488      | -0.265644444 | 0.831827079 |
| -0.117266667 | -0.2658      | 0.831737394 |
| -0.219466667 | -0.265877778 | 0.831692555 |
| -0.202866667 | -0.265922222 | 0.831666934 |
| -0.245466667 | -0.266288889 | 0.831455589 |
| 0.044733333  | -0.266444444 | 0.831365944 |
| 0.113433333  | -0.266555556 | 0.831301918 |

|              |              |             |
|--------------|--------------|-------------|
| -0.068433333 | -0.266566667 | 0.831295515 |
| -0.113966667 | -0.266611111 | 0.831269906 |
| -0.246133333 | -0.266644444 | 0.8312507   |
| -0.089233333 | -0.2669      | 0.831103467 |
| -0.025566667 | -0.266988889 | 0.831052262 |
| 0.063433333  | -0.267111111 | 0.83098186  |
| -0.1317      | -0.2672      | 0.830930662 |
| -0.220166667 | -0.267388889 | 0.830821877 |
| -0.246866667 | -0.267622222 | 0.830687516 |
| -0.055733333 | -0.268077778 | 0.830425253 |
| 0.061466667  | -0.268211111 | 0.830348509 |
| 0.074833333  | -0.268355556 | 0.830265378 |
| -0.0579      | -0.268411111 | 0.830233407 |
| -0.278533333 | -0.2687      | 0.830067175 |
| -0.028033333 | -0.268722222 | 0.83005439  |
| -0.659033333 | -0.268755556 | 0.830035212 |
| -0.021833333 | -0.268777778 | 0.830022426 |
| 0.1281       | -0.2689      | 0.829952111 |
| 0.057233333  | -0.268922222 | 0.829939328 |
| -0.199       | -0.269211111 | 0.829773155 |
| -0.136166667 | -0.269366667 | 0.829683691 |
| -0.0882      | -0.269411111 | 0.829658132 |
| -0.333966667 | -0.269511111 | 0.829600627 |
| -0.067466667 | -0.269566667 | 0.829568681 |
| -0.046366667 | -0.2696      | 0.829549514 |
| -0.073733333 | -0.269633333 | 0.829530347 |
| 0.122266667  | -0.269722222 | 0.829479239 |
| -0.269033333 | -0.270266667 | 0.829166269 |
| -0.414333333 | -0.270322222 | 0.82913434  |
| -0.0663      | -0.270344444 | 0.829121569 |
| -0.081366667 | -0.270477778 | 0.829044945 |
| -0.107333333 | -0.270655556 | 0.828942792 |
| -0.132433333 | -0.271011111 | 0.828738522 |
| 0.0067       | -0.271077778 | 0.828700227 |
| 0.0472       | -0.271222222 | 0.82861726  |
| 0.035466667  | -0.271255556 | 0.828598116 |
| -0.009533333 | -0.271466667 | 0.828476875 |
| -0.291766667 | -0.2715      | 0.828457733 |
| -0.0961      | -0.271911111 | 0.828221689 |
| 0.109766667  | -0.272       | 0.828170661 |
| -0.2823      | -0.272033333 | 0.828151527 |
| -0.1667      | -0.272144444 | 0.828087748 |
| -0.047566667 | -0.272322222 | 0.827985712 |
| -0.1693      | -0.272422222 | 0.827928323 |
| -0.229366667 | -0.272644444 | 0.827800804 |
| -0.1358      | -0.272822222 | 0.827698804 |
| -0.219633333 | -0.272866667 | 0.827673306 |

|              |              |             |
|--------------|--------------|-------------|
| 0.039833333  | -0.272955556 | 0.827622312 |
| -0.357566667 | -0.272988889 | 0.82760319  |
| -0.560033333 | -0.273377778 | 0.827380134 |
| 0.1051       | -0.2734      | 0.827367389 |
| -0.120333333 | -0.273422222 | 0.827354645 |
| 0.210233333  | -0.273655556 | 0.827220844 |
| -0.116266667 | -0.273766667 | 0.827157137 |
| -0.138266667 | -0.273777778 | 0.827150767 |
| 0.0328       | -0.273988889 | 0.827029738 |
| -0.043533333 | -0.274       | 0.827023368 |
| -0.101133333 | -0.274011111 | 0.827016999 |
| -0.0369      | -0.274133333 | 0.826946939 |
| -0.086733333 | -0.2744      | 0.826794101 |
| -0.070433333 | -0.274466667 | 0.826755896 |
| -0.678833333 | -0.274688889 | 0.826628558 |
| -0.036066667 | -0.274988889 | 0.826456683 |
| -0.2421      | -0.275033333 | 0.826431223 |
| -0.064966667 | -0.275044444 | 0.826424858 |
| -0.063366667 | -0.275255556 | 0.826303936 |
| -0.2133      | -0.2753      | 0.826278481 |
| -0.144866667 | -0.275922222 | 0.82592219  |
| -0.0519      | -0.275977778 | 0.825890386 |
| 0.0408       | -0.276033333 | 0.825858583 |
| -0.059833333 | -0.276344444 | 0.82568051  |
| -0.0341      | -0.276611111 | 0.825527906 |
| -0.2398      | -0.276766667 | 0.8254389   |
| -0.0692      | -0.276822222 | 0.825407114 |
| -0.132933333 | -0.277144444 | 0.825222782 |
| -0.223666667 | -0.2773      | 0.825133809 |
| -0.128866667 | -0.277477778 | 0.825032137 |
| -0.3406      | -0.277888889 | 0.824797069 |
| -0.038433333 | -0.278144444 | 0.824650979 |
| -0.121866667 | -0.278155556 | 0.824644628 |
| -0.602266667 | -0.2784      | 0.824504916 |
| -0.017866667 | -0.278577778 | 0.824403321 |
| -0.036366667 | -0.278755556 | 0.824301739 |
| -0.0259      | -0.2789      | 0.824219213 |
| -0.106133333 | -0.279       | 0.824162085 |
| 0.0168       | -0.279022222 | 0.82414939  |
| -0.0267      | -0.279055556 | 0.824130349 |
| -0.458466667 | -0.279166667 | 0.82406688  |
| -0.1926      | -0.279266667 | 0.824009762 |
| -0.249966667 | -0.2796      | 0.823819397 |
| -0.291466667 | -0.279811111 | 0.823698855 |
| -0.0203      | -0.279866667 | 0.823667137 |
| -0.259633333 | -0.280011111 | 0.823584674 |
| -0.0909      | -0.280066667 | 0.82355296  |

|              |              |             |
|--------------|--------------|-------------|
| -0.021733333 | -0.280266667 | 0.823438799 |
| -0.207933333 | -0.280344444 | 0.823394408 |
| -0.2155      | -0.281455556 | 0.822760504 |
| -0.227466667 | -0.281466667 | 0.822754167 |
| -0.2912      | -0.281722222 | 0.822608439 |
| -0.151633333 | -0.281788889 | 0.822570428 |
| -0.103433333 | -0.281877778 | 0.822519748 |
| -0.136633333 | -0.282122222 | 0.822380395 |
| -0.0341      | -0.282266667 | 0.822298062 |
| -0.273933333 | -0.282488889 | 0.822171411 |
| -0.2757      | -0.282677778 | 0.822063773 |
| -0.0668      | -0.283155556 | 0.821791575 |
| -0.0476      | -0.283322222 | 0.821696643 |
| -0.0688      | -0.283577778 | 0.821551102 |
| 0.129966667  | -0.283588889 | 0.821544775 |
| 0.139133333  | -0.283588889 | 0.821544775 |
| 0.0376       | -0.2836      | 0.821538448 |
| 0.044066667  | -0.2837      | 0.821481505 |
| -0.1709      | -0.283822222 | 0.821411914 |
| -0.047433333 | -0.284388889 | 0.82108934  |
| -0.050233333 | -0.284388889 | 0.82108934  |
| -0.081166667 | -0.284766667 | 0.820874362 |
| -0.2401      | -0.2848      | 0.820855396 |
| -0.1081      | -0.284866667 | 0.820817465 |
| 0.0622       | -0.285244444 | 0.820602557 |
| -0.133166667 | -0.285433333 | 0.820495125 |
| -0.171733333 | -0.285466667 | 0.820476168 |
| -0.121833333 | -0.285611111 | 0.820394025 |
| -0.3571      | -0.285611111 | 0.820394025 |
| -0.226266667 | -0.285788889 | 0.820292937 |
| -0.0768      | -0.285877778 | 0.820242398 |
| -0.0953      | -0.285933333 | 0.820210812 |
| -0.212333333 | -0.285944444 | 0.820204495 |
| -0.1942      | -0.286022222 | 0.820160278 |
| -0.069633333 | -0.286077778 | 0.820128696 |
| -0.152866667 | -0.2862      | 0.820059219 |
| -0.095433333 | -0.286577778 | 0.81984451  |
| -0.1003      | -0.286688889 | 0.819781371 |
| -0.123733333 | -0.286766667 | 0.819737177 |
| -0.4115      | -0.286922222 | 0.819648795 |
| -0.215066667 | -0.287233333 | 0.81947206  |
| -0.132933333 | -0.287422222 | 0.819364775 |
| -0.404066667 | -0.287533333 | 0.819301673 |
| -0.0845      | -0.287866667 | 0.819112396 |
| -0.0333      | -0.287877778 | 0.819106088 |
| -0.5003      | -0.287944444 | 0.819068238 |
| -0.347333333 | -0.288533333 | 0.818733974 |

|              |              |             |
|--------------|--------------|-------------|
| -0.1024      | -0.288544444 | 0.818727668 |
| 0.0408       | -0.288544444 | 0.818727668 |
| -0.2939      | -0.289477778 | 0.818198174 |
| 0.0221       | -0.289611111 | 0.81812256  |
| -0.211466667 | -0.289666667 | 0.818091056 |
| -0.178566667 | -0.289822222 | 0.818002852 |
| -0.183933333 | -0.289855556 | 0.817983952 |
| -0.039366667 | -0.290466667 | 0.817637536 |
| -0.221       | -0.290755556 | 0.817473826 |
| -0.095066667 | -0.291011111 | 0.817329034 |
| -0.095466667 | -0.291822222 | 0.816869645 |
| -0.018133333 | -0.292355556 | 0.816567721 |
| -0.145266667 | -0.292588889 | 0.816435665 |
| -0.201966667 | -0.292788889 | 0.816322491 |
| 0.075133333  | -0.292822222 | 0.81630363  |
| 0.053233333  | -0.292822222 | 0.81630363  |
| 0.213833333  | -0.292844444 | 0.816291056 |
| -0.203333333 | -0.292922222 | 0.81624705  |
| -0.1901      | -0.293255556 | 0.816058479 |
| 0.091533333  | -0.293411111 | 0.815970494 |
| -0.110233333 | -0.293755556 | 0.815775703 |
| -0.2007      | -0.293877778 | 0.815706595 |
| -0.106633333 | -0.293944444 | 0.815668903 |
| 0.0763       | -0.294333333 | 0.815449063 |
| -0.149166667 | -0.294466667 | 0.815373703 |
| -0.2597      | -0.294522222 | 0.815342305 |
| -0.360033333 | -0.294877778 | 0.815141387 |
| -0.099466667 | -0.295044444 | 0.815047223 |
| -0.4016      | -0.295077778 | 0.815028392 |
| -0.102366667 | -0.295211111 | 0.814953071 |
| -0.246366667 | -0.295222222 | 0.814946794 |
| -0.253066667 | -0.295333333 | 0.814884032 |
| -0.081866667 | -0.295388889 | 0.814852653 |
| -0.1524      | -0.295677778 | 0.814689502 |
| -0.000733333 | -0.295822222 | 0.814607938 |
| -0.111266667 | -0.296111111 | 0.814444835 |
| -0.065333333 | -0.296522222 | 0.814212784 |
| -0.142133333 | -0.296711111 | 0.814106187 |
| -0.248433333 | -0.296877778 | 0.814012144 |
| 0.1772       | -0.296977778 | 0.813955723 |
| -0.2768      | -0.297011111 | 0.813936916 |
| -0.004533333 | -0.297066667 | 0.813905574 |
| -0.1253      | -0.297355556 | 0.813742612 |
| -0.157333333 | -0.297988889 | 0.813385463 |
| -0.0599      | -0.298011111 | 0.813372934 |
| 0.002        | -0.298255556 | 0.813235131 |
| -0.377266667 | -0.298266667 | 0.813228868 |

|              |              |             |
|--------------|--------------|-------------|
| -0.258466667 | -0.298688889 | 0.812990901 |
| -0.034966667 | -0.298811111 | 0.812922029 |
| -0.1207      | -0.299055556 | 0.812784303 |
| -0.108233333 | -0.299188889 | 0.812709189 |
| -0.056366667 | -0.299211111 | 0.812696671 |
| 0.059633333  | -0.299611111 | 0.812471374 |
| -0.091966667 | -0.299766667 | 0.812383776 |
| 0.051033333  | -0.299822222 | 0.812352493 |
| -0.280833333 | -0.299955556 | 0.812277419 |
| -0.119866667 | -0.3         | 0.812252396 |
| -0.130766667 | -0.300222222 | 0.812127293 |
| -0.466233333 | -0.300711111 | 0.811852132 |
| -0.113966667 | -0.300877778 | 0.811758349 |
| -0.0717      | -0.3011      | 0.811633321 |
| -0.212566667 | -0.301122222 | 0.811620819 |
| -0.435766667 | -0.301233333 | 0.811558314 |
| 0.089933333  | -0.301233333 | 0.811558314 |
| -0.119833333 | -0.301488889 | 0.811414569 |
| -0.336533333 | -0.301555556 | 0.811377074 |
| 0.2778       | -0.3016      | 0.811352079 |
| -0.3557      | -0.301644444 | 0.811327084 |
| -0.149466667 | -0.301722222 | 0.811283346 |
| 0.013366667  | -0.302077778 | 0.811083428 |
| -0.030166667 | -0.302522222 | 0.810833599 |
| 0.002933333  | -0.302855556 | 0.810646279 |
| 0.006833333  | -0.302922222 | 0.81060882  |
| 0.037866667  | -0.302933333 | 0.810602577 |
| -0.0951      | -0.303133333 | 0.810490211 |
| -0.314433333 | -0.303255556 | 0.810421551 |
| -0.176633333 | -0.3037      | 0.810171927 |
| -0.1918      | -0.303977778 | 0.81001595  |
| -0.008766667 | -0.304133333 | 0.809928617 |
| -0.0766      | -0.304333333 | 0.809816345 |
| -0.379933333 | -0.304944444 | 0.809473387 |
| -0.003833333 | -0.305244444 | 0.80930508  |
| -0.362033333 | -0.305511111 | 0.809155502 |
| -0.221833333 | -0.306266667 | 0.808731849 |
| -0.0917      | -0.306277778 | 0.808725621 |
| 0.076033333  | -0.3063      | 0.808713164 |
| -0.105733333 | -0.306344444 | 0.80868825  |
| -0.229666667 | -0.306511111 | 0.808594832 |
| 0.691966667  | -0.306666667 | 0.808507652 |
| -0.0537      | -0.306788889 | 0.80843916  |
| -0.156       | -0.3068      | 0.808432934 |
| -0.258866667 | -0.307311111 | 0.808146577 |
| -0.2072      | -0.307333333 | 0.808134129 |
| 0.108733333  | -0.307355556 | 0.808121681 |

|              |              |             |
|--------------|--------------|-------------|
| -0.438966667 | -0.307555556 | 0.808009659 |
| -0.079666667 | -0.307622222 | 0.807972322 |
| -0.146933333 | -0.307633333 | 0.807966099 |
| -0.186366667 | -0.307733333 | 0.807910097 |
| -0.0568      | -0.307944444 | 0.807791884 |
| -0.192966667 | -0.307944444 | 0.807791884 |
| -0.1263      | -0.308333333 | 0.807574167 |
| -0.296466667 | -0.308666667 | 0.807387599 |
| -0.313666667 | -0.308744444 | 0.807344073 |
| -0.236333333 | -0.3095      | 0.806921368 |
| -0.198533333 | -0.309688889 | 0.806815727 |
| -0.111233333 | -0.309777778 | 0.806766018 |
| 0.019566667  | -0.309866667 | 0.806716312 |
| -0.109933333 | -0.309888889 | 0.806703886 |
| -0.196733333 | -0.3099      | 0.806697673 |
| -0.158133333 | -0.310322222 | 0.806461618 |
| -0.1534      | -0.310455556 | 0.806387089 |
| -0.1955      | -0.310577778 | 0.806318776 |
| 0.6532       | -0.310733333 | 0.806231841 |
| 0.0044       | -0.310855556 | 0.806163542 |
| 0.013033333  | -0.310855556 | 0.806163542 |
| -0.001866667 | -0.311288889 | 0.805921436 |
| -0.216666667 | -0.311533333 | 0.805784895 |
| -0.235633333 | -0.311844444 | 0.80561115  |
| -0.1176      | -0.312266667 | 0.805375412 |
| -0.2345      | -0.312666667 | 0.805152146 |
| -0.1478      | -0.312888889 | 0.805028136 |
| -0.0715      | -0.3129      | 0.805021936 |
| -0.0435      | -0.312944444 | 0.804997136 |
| -0.125066667 | -0.312988889 | 0.804972337 |
| -0.371133333 | -0.313133333 | 0.804891746 |
| 0.125933333  | -0.313177778 | 0.804866951 |
| 0.019666667  | -0.313255556 | 0.80482356  |
| -0.0805      | -0.313322222 | 0.804786371 |
| -0.093033333 | -0.3135      | 0.804687206 |
| -0.065433333 | -0.313544444 | 0.804662417 |
| -0.083066667 | -0.313844444 | 0.804495109 |
| 0.0468       | -0.314166667 | 0.804315447 |
| -0.038333333 | -0.314233333 | 0.804278281 |
| -0.085566667 | -0.3151      | 0.803795274 |
| -0.070766667 | -0.3151      | 0.803795274 |
| -0.3179      | -0.3151      | 0.803795274 |
| -0.307066667 | -0.315122222 | 0.803782893 |
| -0.073766667 | -0.315133333 | 0.803776703 |
| 0.0124       | -0.315422222 | 0.803615768 |
| -0.1139      | -0.315711111 | 0.803454866 |
| -0.196866667 | -0.3158      | 0.803405365 |



|              |              |             |
|--------------|--------------|-------------|
| -0.2595      | -0.316233333 | 0.803164087 |
| -0.154066667 | -0.316233333 | 0.803164087 |
| -0.111933333 | -0.316288889 | 0.803133159 |
| -0.299966667 | -0.316366667 | 0.803089862 |
| -0.164633333 | -0.316866667 | 0.802811581 |
| -0.0712      | -0.317077778 | 0.802694113 |
| -0.070066667 | -0.317377778 | 0.802527215 |
| -0.345033333 | -0.317377778 | 0.802527215 |
| 0.0442       | -0.317711111 | 0.802341813 |
| -0.012566667 | -0.318422222 | 0.801946433 |
| -0.1852      | -0.3186      | 0.801847618 |
| -0.143533333 | -0.318655556 | 0.801816741 |
| -0.198466667 | -0.318766667 | 0.80175499  |
| -0.229366667 | -0.319166667 | 0.801532727 |
| -0.071466667 | -0.319566667 | 0.801310526 |
| -0.145066667 | -0.319811111 | 0.801174767 |
| -0.265833333 | -0.320211111 | 0.800952665 |
| -0.081033333 | -0.320311111 | 0.800897149 |
| -0.1138      | -0.320344444 | 0.800878644 |
| 0.001        | -0.320511111 | 0.800786129 |
| -0.275033333 | -0.320555556 | 0.80076146  |
| -0.267666667 | -0.320555556 | 0.80076146  |
| -0.2273      | -0.320711111 | 0.800675124 |
| 0.115333333  | -0.320722222 | 0.800668957 |
| -0.096233333 | -0.320844444 | 0.800601129 |
| -0.2815      | -0.320888889 | 0.800576466 |
| -0.0972      | -0.321766667 | 0.80008952  |
| -0.000766667 | -0.321877778 | 0.800027902 |
| -0.079066667 | -0.321977778 | 0.79997245  |
| 0.016133333  | -0.322       | 0.799960128 |
| -0.129633333 | -0.322555556 | 0.799652138 |
| -0.2869      | -0.323233333 | 0.799276549 |
| -0.094133333 | -0.323433333 | 0.799165754 |
| -0.400733333 | -0.323533333 | 0.799110362 |
| -0.182333333 | -0.323622222 | 0.799061128 |
| 0.021333333  | -0.324055556 | 0.798821155 |
| -0.328       | -0.324077778 | 0.79880885  |
| -0.259866667 | -0.324155556 | 0.798765787 |
| -0.113833333 | -0.324266667 | 0.798704271 |
| -0.122333333 | -0.324755556 | 0.798433658 |
| -0.0439      | -0.325344444 | 0.798107815 |
| 0.0202       | -0.325444444 | 0.798052496 |
| -0.1253      | -0.325855556 | 0.797825115 |
| -0.007733333 | -0.326       | 0.79774524  |
| -0.0031      | -0.326555556 | 0.797438102 |
| -0.037566667 | -0.326711111 | 0.797352124 |
| -0.215       | -0.326777778 | 0.79731528  |

|              |              |             |
|--------------|--------------|-------------|
| 0.0205       | -0.3268      | 0.797302999 |
| -0.378233333 | -0.3269      | 0.797247736 |
| -0.190066667 | -0.327011111 | 0.797186337 |
| -0.308066667 | -0.3273      | 0.797026722 |
| -0.2047      | -0.3276      | 0.796861002 |
| 0.071433333  | -0.327877778 | 0.796707589 |
| -0.0298      | -0.3281      | 0.796584879 |
| -0.084533333 | -0.328233333 | 0.796511263 |
| -0.2063      | -0.328455556 | 0.796388583 |
| -0.176733333 | -0.328755556 | 0.796222996 |
| 0.117166667  | -0.328766667 | 0.796216864 |
| -0.1247      | -0.328833333 | 0.796180072 |
| -0.2862      | -0.328966667 | 0.796106493 |
| -0.0292      | -0.329233333 | 0.795959354 |
| -0.1527      | -0.329266667 | 0.795940964 |
| -0.2681      | -0.329344444 | 0.795898055 |
| -0.054266667 | -0.329488889 | 0.795818373 |
| -0.1251      | -0.3305      | 0.79526082  |
| -0.1399      | -0.330622222 | 0.79519345  |
| -0.3065      | -0.330811111 | 0.795089343 |
| -0.037366667 | -0.331033333 | 0.794966883 |
| -0.175866667 | -0.331288889 | 0.794826077 |
| -0.043566667 | -0.331466667 | 0.79472814  |
| -0.360433333 | -0.331711111 | 0.794593496 |
| 0.0472       | -0.331711111 | 0.794593496 |
| -0.180966667 | -0.331755556 | 0.794569017 |
| -0.2246      | -0.331855556 | 0.794513944 |
| -0.387266667 | -0.3322      | 0.794324276 |
| -0.113233333 | -0.332211111 | 0.794318158 |
| -0.096833333 | -0.332544444 | 0.794134653 |
| -0.224766667 | -0.333144444 | 0.79380445  |
| 0.098033333  | -0.333166667 | 0.793792223 |
| -0.266666667 | -0.333188889 | 0.793779996 |
| -0.3083      | -0.333222222 | 0.793761656 |
| -0.0219      | -0.334377778 | 0.793126131 |
| -0.170133333 | -0.334511111 | 0.793052834 |
| -0.0746      | -0.334577778 | 0.793016188 |
| -0.3607      | -0.334866667 | 0.792857409 |
| -0.063966667 | -0.335066667 | 0.792747503 |
| -0.097       | -0.3351      | 0.792729187 |
| -0.338033333 | -0.335444444 | 0.792539945 |
| -0.356266667 | -0.335455556 | 0.792533841 |
| -0.044066667 | -0.335788889 | 0.792350748 |
| -0.508766667 | -0.335888889 | 0.792295828 |
| -0.2472      | -0.335955556 | 0.792259217 |
| -0.212233333 | -0.336655556 | 0.791874904 |
| -0.303066667 | -0.336788889 | 0.791801723 |

|              |              |             |
|--------------|--------------|-------------|
| -0.3154      | -0.336955556 | 0.791710255 |
| -0.182466667 | -0.337088889 | 0.791637089 |
| -0.226266667 | -0.337277778 | 0.791533449 |
| -0.1075      | -0.337522222 | 0.791399346 |
| 0.042933333  | -0.337866667 | 0.791210421 |
| -0.132333333 | -0.338144444 | 0.791058095 |
| -0.129       | -0.338466667 | 0.790881434 |
| -0.059066667 | -0.338677778 | 0.790765712 |
| -0.113533333 | -0.338866667 | 0.790662186 |
| -0.424666667 | -0.339077778 | 0.790546496 |
| -0.251566667 | -0.339255556 | 0.790449086 |
| -0.226933333 | -0.339588889 | 0.790266475 |
| -0.189266667 | -0.339822222 | 0.790138672 |
| -0.200166667 | -0.340022222 | 0.790029143 |
| -0.128833333 | -0.3407      | 0.789658074 |
| 0.265466667  | -0.340744444 | 0.789633748 |
| -0.1641      | -0.340877778 | 0.789560774 |
| 0.015066667  | -0.340988889 | 0.789499967 |
| -0.018766667 | -0.341111111 | 0.789433085 |
| -0.030133333 | -0.341188889 | 0.789390527 |
| -0.255366667 | -0.341844444 | 0.789031912 |
| -0.106       | -0.3419      | 0.789001528 |
| -0.202666667 | -0.342511111 | 0.788667386 |
| -0.1068      | -0.3427      | 0.788564134 |
| -0.271166667 | -0.342722222 | 0.788551988 |
| -0.084766667 | -0.342888889 | 0.788460896 |
| -0.168566667 | -0.3432      | 0.788290886 |
| -0.186       | -0.343722222 | 0.788005595 |
| -0.047233333 | -0.343766667 | 0.787981319 |
| -0.085533333 | -0.344433333 | 0.787617279 |
| -0.1012      | -0.344433333 | 0.787617279 |
| -0.437533333 | -0.344522222 | 0.787568753 |
| -0.294433333 | -0.344655556 | 0.787495969 |
| -0.247266667 | -0.344711111 | 0.787465645 |
| -0.0822      | -0.344733333 | 0.787453515 |
| -0.2538      | -0.344988889 | 0.78731404  |
| -0.341266667 | -0.345077778 | 0.787265533 |
| -0.2736      | -0.345222222 | 0.787186715 |
| -0.113233333 | -0.345566667 | 0.786998796 |
| 0.079        | -0.345577778 | 0.786992735 |
| -0.095833333 | -0.345577778 | 0.786992735 |
| -0.127033333 | -0.345977778 | 0.786774564 |
| -0.010833333 | -0.3461      | 0.786707913 |
| -0.132533333 | -0.3462      | 0.786653384 |
| -0.135033333 | -0.346955556 | 0.786241513 |
| 0.026033333  | -0.347044444 | 0.786193072 |
| -0.1618      | -0.347344444 | 0.786029605 |

|              |              |             |
|--------------|--------------|-------------|
| -0.395133333 | -0.348155556 | 0.785587808 |
| 0.003633333  | -0.3482      | 0.785563607 |
| -0.0654      | -0.348322222 | 0.785497058 |
| 0.0116       | -0.348355556 | 0.78547891  |
| 0.014166667  | -0.348366667 | 0.78547286  |
| -0.467866667 | -0.348733333 | 0.785273255 |
| -0.3644      | -0.348911111 | 0.785176494 |
| -0.207733333 | -0.349622222 | 0.784789573 |
| -0.2229      | -0.349744444 | 0.78472309  |
| -0.101766667 | -0.349988889 | 0.784590141 |
| -0.2213      | -0.350066667 | 0.784547843 |
| -0.075366667 | -0.3503      | 0.784420965 |
| -0.083866667 | -0.350322222 | 0.784408883 |
| -0.1205      | -0.3505      | 0.784312229 |
| -0.194766667 | -0.350933333 | 0.784076685 |
| -0.225933333 | -0.351044444 | 0.784016301 |
| -0.354       | -0.351177778 | 0.783943846 |
| -0.185333333 | -0.3513      | 0.783877434 |
| -0.0318      | -0.351511111 | 0.783762737 |
| -0.151566667 | -0.351533333 | 0.783750665 |
| -0.326766667 | -0.352455556 | 0.783249823 |
| -0.0839      | -0.353088889 | 0.782906058 |
| -0.577633333 | -0.353722222 | 0.782562442 |
| 0.1274       | -0.354111111 | 0.782351526 |
| -0.529533333 | -0.354211111 | 0.782297299 |
| 0.039866667  | -0.354233333 | 0.782285249 |
| -0.2559      | -0.354244444 | 0.782279224 |
| -0.097466667 | -0.354477778 | 0.782152713 |
| -0.029166667 | -0.354866667 | 0.781941907 |
| -0.474966667 | -0.355188889 | 0.781767281 |
| -0.2939      | -0.355222222 | 0.781749219 |
| -0.3857      | -0.355288889 | 0.781713095 |
| -0.251266667 | -0.355411111 | 0.781646873 |
| 0.028833333  | -0.355644444 | 0.781520464 |
| -0.257666667 | -0.356011111 | 0.781321863 |
| -0.4925      | -0.356388889 | 0.781117296 |
| -0.0154      | -0.356544444 | 0.781033078 |
| -0.044866667 | -0.357133333 | 0.780714336 |
| -0.203533333 | -0.357388889 | 0.780576054 |
| -0.083733333 | -0.357711111 | 0.780401734 |
| -0.3748      | -0.357722222 | 0.780395724 |
| -0.096466667 | -0.357822222 | 0.780341633 |
| -0.3854      | -0.357855556 | 0.780323603 |
| -0.124266667 | -0.3581      | 0.7801914   |
| -0.1655      | -0.358388889 | 0.780035188 |
| -0.385366667 | -0.358533333 | 0.779957094 |
| -0.148766667 | -0.358533333 | 0.779957094 |

|              |              |             |
|--------------|--------------|-------------|
| -0.287433333 | -0.359022222 | 0.779692833 |
| -0.085466667 | -0.359466667 | 0.779452673 |
| -0.191933333 | -0.359677778 | 0.779338623 |
| -0.263266667 | -0.359766667 | 0.779290608 |
| -0.1325      | -0.360222222 | 0.779044572 |
| -0.004266667 | -0.360522222 | 0.778882591 |
| -0.236066667 | -0.360544444 | 0.778870594 |
| -0.403233333 | -0.360566667 | 0.778858597 |
| 0.0705       | -0.360866667 | 0.778696655 |
| -0.182733333 | -0.3614      | 0.77840884  |
| -0.065233333 | -0.361677778 | 0.778258979 |
| -0.104333333 | -0.362133333 | 0.77801327  |
| -0.2648      | -0.362244444 | 0.777953352 |
| -0.208433333 | -0.362755556 | 0.777677791 |
| -0.267633333 | -0.362844444 | 0.777629878 |
| -0.214766667 | -0.362933333 | 0.777581967 |
| -0.162466667 | -0.363044444 | 0.777522083 |
| -0.202266667 | -0.364222222 | 0.776887593 |
| -0.0445      | -0.364222222 | 0.776887593 |
| -0.1068      | -0.364688889 | 0.776636335 |
| -0.326666667 | -0.364877778 | 0.776534659 |
| -0.265       | -0.364944444 | 0.776498776 |
| -0.1582      | -0.365       | 0.776468875 |
| -0.1827      | -0.365055556 | 0.776438975 |
| -0.077233333 | -0.365222222 | 0.776349283 |
| -0.173       | -0.365455556 | 0.77622373  |
| -0.263066667 | -0.365888889 | 0.775990616 |
| -0.249866667 | -0.366533333 | 0.775644062 |
| -0.218       | -0.366555556 | 0.775632115 |
| -0.010666667 | -0.366811111 | 0.775494734 |
| -0.0364      | -0.3676      | 0.775070796 |
| 0.216166667  | -0.367666667 | 0.775034981 |
| -0.448566667 | -0.367822222 | 0.774951419 |
| -0.170933333 | -0.367966667 | 0.774873834 |
| -0.264833333 | -0.368477778 | 0.774599364 |
| -0.229666667 | -0.369244444 | 0.774187841 |
| -0.304466667 | -0.3704      | 0.773567988 |
| -0.065866667 | -0.3706      | 0.773460757 |
| -0.055366667 | -0.370933333 | 0.77328207  |
| -0.158633333 | -0.370944444 | 0.773276114 |
| -0.3768      | -0.371077778 | 0.773204652 |
| -0.337133333 | -0.371233333 | 0.773121287 |
| 0.067333333  | -0.371622222 | 0.772912915 |
| -0.311166667 | -0.371744444 | 0.772847438 |
| -0.087933333 | -0.3724      | 0.772496338 |
| -0.025766667 | -0.3727      | 0.772335719 |
| -0.002266667 | -0.374655556 | 0.771289537 |

|              |              |             |
|--------------|--------------|-------------|
| -0.4693      | -0.374733333 | 0.771247956 |
| 0.0343       | -0.375311111 | 0.770939145 |
| -0.154133333 | -0.375411111 | 0.770885709 |
| -0.050866667 | -0.375711111 | 0.770725425 |
| -0.340266667 | -0.375822222 | 0.770666069 |
| -0.2829      | -0.376255556 | 0.770434623 |
| -0.1382      | -0.376255556 | 0.770434623 |
| -0.189633333 | -0.377277778 | 0.769888925 |
| -0.230066667 | -0.378411111 | 0.769284363 |
| -0.203633333 | -0.379011111 | 0.768964493 |
| -0.488166667 | -0.379133333 | 0.768899351 |
| -0.094566667 | -0.380011111 | 0.768431672 |
| -0.186133333 | -0.380644444 | 0.76809441  |
| -0.066466667 | -0.380844444 | 0.767987937 |
| 0.374866667  | -0.381077778 | 0.767863737 |
| -0.310133333 | -0.3815      | 0.767639045 |
| -0.280833333 | -0.381644444 | 0.767562192 |
| -0.262433333 | -0.3817      | 0.767532635 |
| -0.2909      | -0.3825      | 0.767107143 |
| -0.0164      | -0.383888889 | 0.766369001 |
| -0.074866667 | -0.384577778 | 0.766003146 |
| -0.6352      | -0.384777778 | 0.765896963 |
| -0.196466667 | -0.384977778 | 0.765790794 |
| -0.043333333 | -0.385488889 | 0.765519541 |
| -0.2669      | -0.385722222 | 0.765395741 |
| -0.2636      | -0.386844444 | 0.764800598 |
| 0.369833333  | -0.386966667 | 0.764735808 |
| -0.073266667 | -0.387222222 | 0.764600356 |
| -0.092566667 | -0.387788889 | 0.764300093 |
| -0.3302      | -0.388477778 | 0.763935226 |
| -0.2218      | -0.3886      | 0.763870509 |
| -0.170333333 | -0.390011111 | 0.763123727 |
| -0.080266667 | -0.390144444 | 0.763053203 |
| -0.0729      | -0.390855556 | 0.762677183 |
| -0.0811      | -0.391088889 | 0.762553842 |
| -0.128333333 | -0.3912      | 0.762495115 |
| -0.018766667 | -0.391322222 | 0.762430521 |
| -0.183566667 | -0.391488889 | 0.762342446 |
| -0.5572      | -0.391522222 | 0.762324833 |
| -0.395933333 | -0.391566667 | 0.762301348 |
| -0.355233333 | -0.3919      | 0.76212524  |
| -0.118233333 | -0.392266667 | 0.761931567 |
| -0.125766667 | -0.392411111 | 0.761855286 |
| -0.1108      | -0.392555556 | 0.761779011 |
| -0.0288      | -0.393244444 | 0.761415348 |
| -0.240233333 | -0.393477778 | 0.761292211 |
| -0.152133333 | -0.393566667 | 0.761245307 |

|              |              |             |
|--------------|--------------|-------------|
| 0.2516       | -0.394133333 | 0.760946361 |
| -0.1436      | -0.394377778 | 0.76081744  |
| -0.2408      | -0.394544444 | 0.760729552 |
| -0.195366667 | -0.3953      | 0.760331254 |
| -0.063833333 | -0.396422222 | 0.759740049 |
| -0.357266667 | -0.396755556 | 0.759564532 |
| -0.268933333 | -0.396844444 | 0.759517734 |
| -0.159666667 | -0.396966667 | 0.759453392 |
| -0.2182      | -0.397277778 | 0.759289637 |
| -0.312533333 | -0.397322222 | 0.759266246 |
| 0.137433333  | -0.397677778 | 0.759079146 |
| -0.0886      | -0.397777778 | 0.759026532 |
| -0.419466667 | -0.398566667 | 0.758611598 |
| -0.1301      | -0.3989      | 0.758436342 |
| -0.301566667 | -0.399077778 | 0.758342888 |
| -0.329966667 | -0.399788889 | 0.75796919  |
| -0.2665      | -0.400988889 | 0.757338991 |
| 0.079766667  | -0.401144444 | 0.757257337 |
| -0.280533333 | -0.401777778 | 0.756924979 |
| -0.508866667 | -0.402033333 | 0.756790911 |
| -0.126266667 | -0.402133333 | 0.756738456 |
| -0.355966667 | -0.402233333 | 0.756686004 |
| -0.203033333 | -0.402366667 | 0.756616075 |
| -0.496833333 | -0.402377778 | 0.756610248 |
| -0.050033333 | -0.402411111 | 0.756592767 |
| -0.0623      | -0.4027      | 0.75644128  |
| -0.186466667 | -0.403177778 | 0.75619081  |
| -0.0775      | -0.403455556 | 0.756045227 |
| 0.016566667  | -0.403733333 | 0.755899671 |
| -0.025133333 | -0.403988889 | 0.755765785 |
| 0.854033333  | -0.404088889 | 0.755713401 |
| -0.316866667 | -0.404244444 | 0.755631922 |
| -0.169366667 | -0.404788889 | 0.755346815 |
| -0.107133333 | -0.4049      | 0.755288644 |
| -0.105066667 | -0.406077778 | 0.754672298 |
| 0.016566667  | -0.406677778 | 0.754358504 |
| -0.041433333 | -0.4068      | 0.754294599 |
| -0.187433333 | -0.407055556 | 0.754160996 |
| -0.226       | -0.407188889 | 0.7540913   |
| -0.256666667 | -0.407333333 | 0.754015804 |
| -0.184266667 | -0.407422222 | 0.753969348 |
| -0.1876      | -0.407688889 | 0.753829998 |
| -0.2224      | -0.407788889 | 0.753777748 |
| -0.186166667 | -0.4078      | 0.753771943 |
| -0.302266667 | -0.407911111 | 0.753713892 |
| 0.227933333  | -0.408022222 | 0.753655846 |
| -0.1052      | -0.408077778 | 0.753626825 |

|              |              |             |
|--------------|--------------|-------------|
| -0.181333333 | -0.408466667 | 0.753423706 |
| -0.2511      | -0.408855556 | 0.753220643 |
| -0.412766667 | -0.409455556 | 0.752907452 |
| -0.099133333 | -0.4098      | 0.752727717 |
| -0.2356      | -0.409888889 | 0.75268134  |
| -0.1536      | -0.409911111 | 0.752669747 |
| -0.0894      | -0.409922222 | 0.75266395  |
| -0.2587      | -0.4105      | 0.75236258  |
| -0.214066667 | -0.410811111 | 0.752200353 |
| 0.0721       | -0.411077778 | 0.75206133  |
| -0.346566667 | -0.411433333 | 0.751876005 |
| -0.476933333 | -0.411711111 | 0.751731253 |
| -0.203533333 | -0.411788889 | 0.751690727 |
| -0.436433333 | -0.411977778 | 0.751592316 |
| -0.016466667 | -0.412211111 | 0.751470767 |
| -0.0483      | -0.412355556 | 0.751395533 |
| -0.2667      | -0.412522222 | 0.751308733 |
| -0.229533333 | -0.413233333 | 0.750938501 |
| -0.3469      | -0.413566667 | 0.750765018 |
| -0.145766667 | -0.414488889 | 0.750285255 |
| 0.029933333  | -0.414611111 | 0.750221695 |
| -0.042166667 | -0.414677778 | 0.750187028 |
| -0.038366667 | -0.415177778 | 0.749927078 |
| 0.1166       | -0.415677778 | 0.749667218 |
| -0.033966667 | -0.416566667 | 0.749205468 |
| -0.2713      | -0.416744444 | 0.749113152 |
| -0.199066667 | -0.417866667 | 0.748530669 |
| -0.3881      | -0.419177778 | 0.747850719 |
| -0.120133333 | -0.419322222 | 0.747775847 |
| -0.478866667 | -0.419344444 | 0.747764329 |
| -0.166066667 | -0.419466667 | 0.747700982 |
| -0.2385      | -0.4203      | 0.747269218 |
| -0.384733333 | -0.421055556 | 0.746877967 |
| -0.145966667 | -0.421566667 | 0.746613414 |
| -0.283       | -0.422244444 | 0.746262737 |
| -0.2701      | -0.422622222 | 0.74606735  |
| -0.394733333 | -0.4233      | 0.74571693  |
| -0.228733333 | -0.423344444 | 0.745693957 |
| -0.461733333 | -0.423466667 | 0.745630786 |
| -0.204033333 | -0.423566667 | 0.745579105 |
| -0.1259      | -0.423922222 | 0.745395378 |
| -0.074666667 | -0.424866667 | 0.744907572 |
| -0.2822      | -0.425688889 | 0.744483155 |
| -0.234933333 | -0.426       | 0.744322628 |
| -0.3424      | -0.426044444 | 0.744299698 |
| -0.636566667 | -0.426955556 | 0.743829796 |
| -0.276533333 | -0.4274      | 0.743600683 |



|              |              |             |
|--------------|--------------|-------------|
| -0.068333333 | -0.427611111 | 0.743491879 |
| -0.187466667 | -0.427855556 | 0.743365915 |
| -0.1205      | -0.4293      | 0.74262202  |
| -0.1347      | -0.429366667 | 0.742587705 |
| 0.0446       | -0.4316      | 0.741439047 |
| -0.1563      | -0.4321      | 0.741182128 |
| -0.204533333 | -0.4322      | 0.741130755 |
| -0.420666667 | -0.432255556 | 0.741102216 |
| -0.1921      | -0.432344444 | 0.741056556 |
| -0.130333333 | -0.432866667 | 0.740788359 |
| -0.1566      | -0.4333      | 0.740565887 |
| -0.271866667 | -0.433355556 | 0.740537369 |
| -0.283366667 | -0.433355556 | 0.740537369 |
| -0.2819      | -0.433477778 | 0.740474635 |
| -0.1426      | -0.433611111 | 0.740406204 |
| -0.2228      | -0.433622222 | 0.740400502 |
| -0.3216      | -0.434333333 | 0.740035645 |
| -0.075966667 | -0.434777778 | 0.7398077   |
| -0.3578      | -0.4363      | 0.739027523 |
| -0.1537      | -0.436977778 | 0.73868041  |
| -0.196433333 | -0.437322222 | 0.73850407  |
| -0.156833333 | -0.438055556 | 0.738128778 |
| -0.388366667 | -0.438244444 | 0.738032143 |
| -0.323566667 | -0.4383      | 0.738003723 |
| -0.0491      | -0.439377778 | 0.737452597 |
| -0.206       | -0.439677778 | 0.737299264 |
| 0.329533333  | -0.439966667 | 0.73715164  |
| -0.037466667 | -0.440588889 | 0.736833782 |
| -0.1013      | -0.441188889 | 0.736527405 |
| -0.112666667 | -0.441377778 | 0.736430979 |
| -0.037966667 | -0.441588889 | 0.736323224 |
| -0.158333333 | -0.4416      | 0.736317553 |
| 0.413366667  | -0.441622222 | 0.736306212 |
| -0.271066667 | -0.442633333 | 0.735790353 |
| -0.117133333 | -0.443477778 | 0.735359803 |
| -0.257466667 | -0.444111111 | 0.735037056 |
| -0.4137      | -0.445055556 | 0.73455603  |
| -0.180666667 | -0.445166667 | 0.734499459 |
| -0.105233333 | -0.448533333 | 0.732787433 |
| -0.167466667 | -0.448555556 | 0.732776146 |
| -0.0934      | -0.449455556 | 0.732319159 |
| -0.3834      | -0.449477778 | 0.732307879 |
| 0.0011       | -0.451322222 | 0.731372242 |
| -0.368533333 | -0.452311111 | 0.730871098 |
| -0.222233333 | -0.452355556 | 0.730848583 |
| -0.100733333 | -0.452588889 | 0.730730389 |
| -0.137633333 | -0.453988889 | 0.730021628 |

|              |              |             |
|--------------|--------------|-------------|
| -0.1001      | -0.454011111 | 0.730010383 |
| -0.222933333 | -0.456533333 | 0.728735242 |
| -0.212       | -0.4575      | 0.728247122 |
| -0.328133333 | -0.457811111 | 0.728090095 |
| -0.404633333 | -0.4584      | 0.727792959 |
| -0.168666667 | -0.458477778 | 0.727753724 |
| -0.163266667 | -0.458544444 | 0.727720096 |
| -0.0668      | -0.458777778 | 0.727602408 |
| -0.437533333 | -0.458866667 | 0.727557579 |
| -0.1418      | -0.459122222 | 0.727428713 |
| 0.0109       | -0.460088889 | 0.726941468 |
| 0.0001       | -0.460966667 | 0.72649931  |
| -0.280033333 | -0.461011111 | 0.72647693  |
| -0.366066667 | -0.461044444 | 0.726460145 |
| -0.084533333 | -0.461522222 | 0.726219603 |
| -0.232966667 | -0.462322222 | 0.725817012 |
| -0.0844      | -0.4627      | 0.725626978 |
| -0.207133333 | -0.462811111 | 0.725571095 |
| -0.207733333 | -0.463488889 | 0.725230302 |
| -0.302466667 | -0.463511111 | 0.725219131 |
| -0.179333333 | -0.463688889 | 0.725129771 |
| -0.252766667 | -0.464144444 | 0.724900835 |
| -0.038466667 | -0.464833333 | 0.724554776 |
| 0.2119       | -0.465244444 | 0.724348336 |
| -0.0899      | -0.465533333 | 0.724203305 |
| -0.1128      | -0.465966667 | 0.723985814 |
| -0.0106      | -0.466088889 | 0.723924482 |
| -0.1027      | -0.466111111 | 0.723913331 |
| -0.119233333 | -0.466288889 | 0.723824131 |
| -0.071633333 | -0.468433333 | 0.722749027 |
| 0.034066667  | -0.469       | 0.722465199 |
| -0.237066667 | -0.469966667 | 0.721981279 |
| -0.011166667 | -0.470644444 | 0.721642172 |
| 0.263766667  | -0.471355556 | 0.721286559 |
| 0.0026       | -0.472333333 | 0.720797877 |
| 0.0099       | -0.4727      | 0.720614706 |
| -0.243433333 | -0.473066667 | 0.720431583 |
| -0.205533333 | -0.4732      | 0.720365004 |
| -0.3158      | -0.473322222 | 0.720303978 |
| -0.4783      | -0.473966667 | 0.719982294 |
| -0.339433333 | -0.474411111 | 0.719760527 |
| -0.269533333 | -0.474577778 | 0.719677382 |
| -0.2651      | -0.474888889 | 0.719522203 |
| -0.331966667 | -0.475822222 | 0.719056868 |
| -0.319633333 | -0.479244444 | 0.717353212 |
| 0.022233333  | -0.479322222 | 0.717314539 |
| -0.037733333 | -0.479788889 | 0.717082548 |

|              |              |             |
|--------------|--------------|-------------|
| -0.198766667 | -0.481222222 | 0.716370472 |
| -0.150033333 | -0.481966667 | 0.716000914 |
| -0.188433333 | -0.483166667 | 0.715405608 |
| -0.089133333 | -0.483822222 | 0.715080604 |
| -0.254366667 | -0.484422222 | 0.714783273 |
| -0.306166667 | -0.484788889 | 0.714601631 |
| -0.331966667 | -0.485455556 | 0.714271491 |
| -0.267466667 | -0.486177778 | 0.713914012 |
| -0.5351      | -0.487244444 | 0.713386369 |
| -0.340233333 | -0.488177778 | 0.712925002 |
| -0.552266667 | -0.489022222 | 0.712507832 |
| -0.026966667 | -0.489844444 | 0.712101875 |
| -0.1092      | -0.489911111 | 0.712068969 |
| -0.1747      | -0.490688889 | 0.711685186 |
| -0.1673      | -0.490877778 | 0.711592013 |
| -0.240266667 | -0.490933333 | 0.711564611 |
| -0.141066667 | -0.491244444 | 0.711411182 |
| 0.023566667  | -0.492       | 0.711038705 |
| -0.255366667 | -0.492288889 | 0.710896339 |
| -0.3537      | -0.493444444 | 0.710327161 |
| -0.1462      | -0.493455556 | 0.71032169  |
| -0.353033333 | -0.493822222 | 0.710141182 |
| -0.3089      | -0.494377778 | 0.709867772 |
| -0.194233333 | -0.495611111 | 0.709261179 |
| -0.3834      | -0.495688889 | 0.709222942 |
| -0.1004      | -0.496566667 | 0.708791562 |
| -0.149166667 | -0.4968      | 0.708676935 |
| -0.263266667 | -0.4975      | 0.708333166 |
| 0.017366667  | -0.497711111 | 0.708229523 |
| -0.1861      | -0.497877778 | 0.708147709 |
| -0.353333333 | -0.498033333 | 0.708071359 |
| -0.3582      | -0.498833333 | 0.70767883  |
| -0.0559      | -0.4996      | 0.70730286  |
| -0.394266667 | -0.500177778 | 0.707019652 |
| -0.0955      | -0.501066667 | 0.70658417  |
| -0.2081      | -0.501433333 | 0.706404612 |
| -0.0545      | -0.501533333 | 0.706355649 |
| -0.151366667 | -0.501788889 | 0.706230538 |
| -0.1739      | -0.502366667 | 0.70594776  |
| -0.301833333 | -0.502966667 | 0.705654226 |
| -0.237466667 | -0.503044444 | 0.705616184 |
| -0.092533333 | -0.503222222 | 0.705529239 |
| -0.245333333 | -0.503366667 | 0.705458604 |
| -0.230433333 | -0.5042      | 0.705051233 |
| -0.131133333 | -0.504244444 | 0.705029513 |
| 0.5014       | -0.505166667 | 0.704578977 |
| -0.0686      | -0.5054      | 0.704465031 |

|              |              |             |
|--------------|--------------|-------------|
| -0.100966667 | -0.505411111 | 0.704459606 |
| -0.1736      | -0.507766667 | 0.70331034  |
| -0.1782      | -0.509222222 | 0.702601118 |
| 0.372366667  | -0.513233333 | 0.700650396 |
| -0.2343      | -0.514077778 | 0.700240408 |
| -0.3778      | -0.517311111 | 0.698672804 |
| -0.555233333 | -0.517611111 | 0.698527534 |
| -0.1047      | -0.517844444 | 0.698414567 |
| -0.4027      | -0.518011111 | 0.698333888 |
| -0.125333333 | -0.518422222 | 0.698134919 |
| 0.005666667  | -0.519       | 0.697855382 |
| 0.131466667  | -0.520844444 | 0.696963764 |
| -0.233766667 | -0.520877778 | 0.696947661 |
| -0.3147      | -0.521766667 | 0.696518382 |
| 0.055666667  | -0.521933333 | 0.696437922 |
| -0.1665      | -0.524       | 0.695440986 |
| -0.2458      | -0.524344444 | 0.695274969 |
| -0.196866667 | -0.525577778 | 0.694680845 |
| -0.056       | -0.526055556 | 0.694450825 |
| -0.130033333 | -0.526188889 | 0.694386647 |
| -0.355466667 | -0.526711111 | 0.694135341 |
| -0.444366667 | -0.527688889 | 0.693665054 |
| -0.3452      | -0.528088889 | 0.693472756 |
| -0.1037      | -0.528844444 | 0.693109672 |
| -0.3767      | -0.530555556 | 0.692288095 |
| -0.412033333 | -0.5314      | 0.691883001 |
| -0.345366667 | -0.531777778 | 0.691701851 |
| -0.259766667 | -0.5321      | 0.691547378 |
| -0.4395      | -0.532777778 | 0.691222566 |
| -0.1546      | -0.533211111 | 0.691014979 |
| -0.0985      | -0.535066667 | 0.690126785 |
| -0.2623      | -0.535344444 | 0.689993921 |
| -0.154       | -0.535511111 | 0.689914214 |
| -0.369666667 | -0.536411111 | 0.689483957 |
| -0.212333333 | -0.536522222 | 0.689430858 |
| -0.190733333 | -0.538       | 0.688725023 |
| -0.021966667 | -0.539577778 | 0.687972223 |
| -0.0711      | -0.541133333 | 0.687230831 |
| -0.185166667 | -0.541177778 | 0.68720966  |
| -0.116566667 | -0.542088889 | 0.686775801 |
| -0.105933333 | -0.542366667 | 0.686643581 |
| -0.083833333 | -0.543744444 | 0.685988148 |
| 0.086433333  | -0.545866667 | 0.684979793 |
| -0.359966667 | -0.546055556 | 0.684890116 |
| -0.301966667 | -0.548055556 | 0.683941314 |
| -0.384733333 | -0.548344444 | 0.683804374 |
| -0.261233333 | -0.548811111 | 0.68358322  |

|              |              |             |
|--------------|--------------|-------------|
| -0.050666667 | -0.552544444 | 0.681816565 |
| -0.077366667 | -0.554133333 | 0.681066071 |
| -0.095766667 | -0.555066667 | 0.680625606 |
| -0.2017      | -0.555822222 | 0.680269248 |
| -0.375633333 | -0.556033333 | 0.680169711 |
| -0.311933333 | -0.556466667 | 0.679965443 |
| 0.204433333  | -0.557266667 | 0.679588495 |
| -0.5561      | -0.562844444 | 0.676966128 |
| -0.303066667 | -0.563233333 | 0.676783672 |
| -0.561366667 | -0.563922222 | 0.676460584 |
| -0.140266667 | -0.564366667 | 0.676252221 |
| -0.450933333 | -0.564933333 | 0.675986653 |
| -0.5391      | -0.566133333 | 0.675424617 |
| -0.3061      | -0.566533333 | 0.675237375 |
| -0.4799      | -0.566977778 | 0.67502939  |
| -0.1337      | -0.5705      | 0.673383371 |
| -0.3715      | -0.5726      | 0.672403901 |
| -0.312966667 | -0.572677778 | 0.672367652 |
| -0.3757      | -0.573022222 | 0.672207143 |
| 0.693833333  | -0.573166667 | 0.672139844 |
| 0.116033333  | -0.573244444 | 0.672103609 |
| -0.2265      | -0.574933333 | 0.671317272 |
| -0.334566667 | -0.575488889 | 0.67105881  |
| -0.0892      | -0.5757      | 0.67096062  |
| -0.307166667 | -0.575866667 | 0.670883112 |
| -0.1912      | -0.5784      | 0.669706094 |
| -0.088933333 | -0.578711111 | 0.66956169  |
| -0.122366667 | -0.58        | 0.668963777 |
| -0.573533333 | -0.5803      | 0.668824685 |
| -0.192433333 | -0.580766667 | 0.668608376 |
| -0.097733333 | -0.582177778 | 0.667954725 |
| -0.518233333 | -0.582644444 | 0.667738697 |
| -0.5122      | -0.583355556 | 0.667409647 |
| 0.048666667  | -0.583522222 | 0.667332549 |
| -0.276733333 | -0.584311111 | 0.666967741 |
| -0.433133333 | -0.584588889 | 0.666839334 |
| 0.272266667  | -0.585111111 | 0.666597998 |
| -0.065566667 | -0.587588889 | 0.665454122 |
| -0.290233333 | -0.588277778 | 0.665136442 |
| -0.018866667 | -0.589044444 | 0.664783074 |
| -0.261066667 | -0.595788889 | 0.661682538 |
| -0.150633333 | -0.596477778 | 0.661366659 |
| -0.437866667 | -0.599022222 | 0.660201251 |
| -0.509633333 | -0.599788889 | 0.659850505 |
| -0.033166667 | -0.602822222 | 0.658464596 |
| -0.0861      | -0.608344444 | 0.655949    |
| -0.423066667 | -0.611988889 | 0.654294075 |

|              |              |             |
|--------------|--------------|-------------|
| -0.4049      | -0.613444444 | 0.653634281 |
| -0.312966667 | -0.613688889 | 0.653523541 |
| -0.3253      | -0.614788889 | 0.653025444 |
| -0.074933333 | -0.616155556 | 0.652407126 |
| -0.1094      | -0.619388889 | 0.650946604 |
| 0.105        | -0.623644444 | 0.649029319 |
| -0.075633333 | -0.628622222 | 0.64679381  |
| -0.492633333 | -0.630166667 | 0.64610177  |
| -0.0835      | -0.631577778 | 0.645470122 |
| -0.156666667 | -0.632       | 0.645281245 |
| -0.345566667 | -0.633733333 | 0.644506434 |
| -0.5581      | -0.639       | 0.642157904 |
| -0.099833333 | -0.639211111 | 0.642063944 |
| -0.433666667 | -0.640033333 | 0.641698122 |
| -0.523633333 | -0.640877778 | 0.641322631 |
| -0.303566667 | -0.641466667 | 0.641060905 |
| -0.216266667 | -0.6434      | 0.640202404 |
| 0.066666667  | -0.6436      | 0.64011366  |
| -0.4543      | -0.6457      | 0.639182582 |
| -0.195333333 | -0.646155556 | 0.638980781 |
| -0.242333333 | -0.649444444 | 0.637525766 |
| -0.4019      | -0.652722222 | 0.636078963 |
| -0.196733333 | -0.652966667 | 0.635971197 |
| -0.427433333 | -0.655344444 | 0.634923885 |
| -0.355566667 | -0.6555      | 0.634855429 |
| -0.286766667 | -0.657177778 | 0.634117555 |
| -0.122566667 | -0.657866667 | 0.633814835 |
| 0.343333333  | -0.662222222 | 0.631904208 |
| -0.102966667 | -0.664244444 | 0.63101909  |
| -0.1664      | -0.664533333 | 0.630892745 |
| -0.303966667 | -0.665222222 | 0.630591565 |
| -0.261333333 | -0.665377778 | 0.630523577 |
| -0.292       | -0.666288889 | 0.630125505 |
| 0.1433       | -0.667877778 | 0.629431909 |
| -0.482833333 | -0.6683      | 0.629247725 |
| -0.411733333 | -0.6684      | 0.62920411  |
| -0.130666667 | -0.671422222 | 0.627887405 |
| -0.441966667 | -0.674533333 | 0.626534851 |
| -0.3543      | -0.674933333 | 0.626361163 |
| -0.7157      | -0.680233333 | 0.624064334 |
| -0.312466667 | -0.681033333 | 0.623718375 |
| -0.2953      | -0.681711111 | 0.623425421 |
| -0.191566667 | -0.684322222 | 0.622298113 |
| 0.211333333  | -0.690477778 | 0.619648607 |
| 0.0497       | -0.692333333 | 0.618852144 |
| -0.4094      | -0.693277778 | 0.618447152 |
| -0.391833333 | -0.695544444 | 0.617476251 |

|              |              |             |
|--------------|--------------|-------------|
| 0.331233333  | -0.696944444 | 0.616877339 |
| -0.6265      | -0.698344444 | 0.616279008 |
| -0.602433333 | -0.698533333 | 0.616198325 |
| -0.0105      | -0.699111111 | 0.615951597 |
| -0.270133333 | -0.699155556 | 0.615932622 |
| -0.3328      | -0.699177778 | 0.615923134 |
| -0.366366667 | -0.702988889 | 0.614298221 |
| 0.151733333  | -0.703922222 | 0.613900937 |
| -0.279966667 | -0.707833333 | 0.612238921 |
| 0.4506       | -0.708177778 | 0.612092766 |
| -0.317533333 | -0.711344444 | 0.610750716 |
| -0.3505      | -0.712433333 | 0.61028992  |
| 0.1435       | -0.713       | 0.610050255 |
| -0.114933333 | -0.715944444 | 0.608806453 |
| -0.275566667 | -0.716255556 | 0.608675181 |
| 0.008733333  | -0.716288889 | 0.608661117 |
| -0.572666667 | -0.717066667 | 0.608333068 |
| -0.3327      | -0.718377778 | 0.60778047  |
| -0.0081      | -0.722911111 | 0.605873659 |
| -0.207333333 | -0.7262      | 0.604494031 |
| -0.444833333 | -0.728111111 | 0.6036938   |
| -0.530066667 | -0.730322222 | 0.602769272 |
| -0.2725      | -0.731533333 | 0.602263472 |
| -0.295133333 | -0.734911111 | 0.600855044 |
| -0.2023      | -0.738355556 | 0.59942221  |
| -0.416466667 | -0.739588889 | 0.598909994 |
| -0.444966667 | -0.7445      | 0.596874697 |
| -0.2747      | -0.747144444 | 0.595781634 |
| -0.106866667 | -0.747422222 | 0.595666933 |
| -0.411333333 | -0.754644444 | 0.592692438 |
| -0.314833333 | -0.755311111 | 0.592418619 |
| 0.097633333  | -0.7562      | 0.592053724 |
| -0.248233333 | -0.756844444 | 0.591789316 |
| -0.284866667 | -0.762633333 | 0.589419488 |
| -0.502033333 | -0.764466667 | 0.588670947 |
| -0.6696      | -0.769777778 | 0.586507809 |
| -0.591166667 | -0.770355556 | 0.586272968 |
| -0.553933333 | -0.774477778 | 0.584600198 |
| -0.149333333 | -0.775444444 | 0.584208622 |
| -0.133566667 | -0.775477778 | 0.584195124 |
| -0.4176      | -0.778744444 | 0.582873839 |
| -0.3473      | -0.786344444 | 0.57981138  |
| 0.006966667  | -0.795322222 | 0.576214463 |
| -0.415566667 | -0.796922222 | 0.575575775 |
| -0.3052      | -0.800344444 | 0.574212068 |
| -0.3473      | -0.805122222 | 0.572313593 |
| -0.049233333 | -0.805411111 | 0.572199003 |

|              |              |             |
|--------------|--------------|-------------|
| -0.5028      | -0.805711111 | 0.57208003  |
| -0.5265      | -0.806377778 | 0.571815734 |
| 0.190633333  | -0.811466667 | 0.569802293 |
| -0.206833333 | -0.812744444 | 0.56929785  |
| -0.332133333 | -0.827233333 | 0.563609044 |
| -0.662066667 | -0.827433333 | 0.563530916 |
| -0.4241      | -0.827822222 | 0.563379033 |
| -0.483233333 | -0.834266667 | 0.56086806  |
| -0.275       | -0.840266667 | 0.558540319 |
| -0.4586      | -0.8408      | 0.558333877 |
| -0.5356      | -0.841211111 | 0.558174797 |
| -0.353       | -0.844666667 | 0.556839451 |
| -0.412566667 | -0.845211111 | 0.556629351 |
| -0.038666667 | -0.8527      | 0.553747429 |
| -0.3784      | -0.852922222 | 0.55366214  |
| -0.263566667 | -0.856933333 | 0.552124937 |
| 0.171133333  | -0.861911111 | 0.550223205 |
| -0.837666667 | -0.865233333 | 0.548957614 |
| -0.441233333 | -0.873255556 | 0.545913562 |
| 0.225033333  | -0.874111111 | 0.545589918 |
| -0.038633333 | -0.881222222 | 0.542907296 |
| -0.585966667 | -0.888611111 | 0.540133857 |
| -0.3425      | -0.888788889 | 0.540067303 |
| -0.107866667 | -0.891988889 | 0.538870723 |
| -0.7437      | -0.900733333 | 0.535614405 |
| -0.603866667 | -0.9021      | 0.535107257 |
| -0.308466667 | -0.907622222 | 0.533062935 |
| -0.123666667 | -0.912344444 | 0.531320969 |
| 0.0671       | -0.913922222 | 0.530740217 |
| -0.234166667 | -0.914622222 | 0.530482762 |
| -0.487       | -0.925377778 | 0.526542622 |
| -0.1567      | -0.9259      | 0.52635206  |
| -0.1065      | -0.927788889 | 0.52566337  |
| -0.066766667 | -0.931122222 | 0.524450232 |
| -0.258133333 | -0.937555556 | 0.522116785 |
| -0.2474      | -0.955244444 | 0.515754195 |
| -0.271966667 | -0.956277778 | 0.515384917 |
| -0.418766667 | -0.965133333 | 0.512231069 |
| -0.847366667 | -0.983311111 | 0.505817511 |
| -0.741566667 | -0.983744444 | 0.505665605 |
| -0.745933333 | -0.998677778 | 0.500458457 |
| -0.438133333 | -1.012122222 | 0.495816359 |
| -0.0227      | -1.017044444 | 0.494127603 |
| -0.843966667 | -1.0254      | 0.49127407  |
| -0.524333333 | -1.036577778 | 0.487482462 |
| -0.676733333 | -1.048822222 | 0.483362608 |
| -0.760666667 | -1.052033333 | 0.482287949 |



|              |              |             |
|--------------|--------------|-------------|
| -0.743       | -1.067544444 | 0.477130414 |
| 0.237266667  | -1.071177778 | 0.475930304 |
| -0.7412      | -1.073333333 | 0.475219739 |
| -0.0556      | -1.088666667 | 0.470195727 |
| -0.8201      | -1.117455556 | 0.460905997 |
| -0.037333333 | -1.125077778 | 0.458477304 |
| -0.6755      | -1.149355556 | 0.450826568 |
| -0.719066667 | -1.151844444 | 0.450049488 |
| -0.553366667 | -1.183311111 | 0.440339719 |
| -0.880666667 | -1.194288889 | 0.437001795 |
| 0.484133333  | -1.217955556 | 0.429891486 |
| -0.962       | -1.224244444 | 0.428021614 |
| -1.104433333 | -1.224722222 | 0.427879889 |
| -0.149433333 | -1.225066667 | 0.427777745 |
| -0.706633333 | -1.227211111 | 0.427142362 |
| -0.372966667 | -1.237311111 | 0.424162472 |
| -0.849       | -1.250444444 | 0.420318702 |
| -0.0187      | -1.280133333 | 0.411757452 |
| -0.6066      | -1.311344444 | 0.402945201 |
| -0.755       | -1.324833333 | 0.399195307 |
| -0.2796      | -1.342222222 | 0.394412663 |
| -0.894166667 | -1.3491      | 0.39253685  |
| -0.678066667 | -1.4151      | 0.374983755 |
| -0.183166667 | -1.417344444 | 0.374400834 |
| -0.098433333 | -1.424377778 | 0.372580022 |
| 0.3308       | -1.427644444 | 0.37173735  |
| -0.640566667 | -1.476888889 | 0.359262712 |
| -0.796333333 | -1.529033333 | 0.346509465 |
| -0.6402      | -1.537744444 | 0.344423517 |
| -0.872766667 | -1.619222222 | 0.325510904 |
| -0.683666667 | -1.667355556 | 0.314829895 |
| -0.833566667 | -1.702777778 | 0.307194059 |
| -0.967166667 | -1.717211111 | 0.304136082 |
| -0.797033333 | -1.736066667 | 0.300186985 |
| -1.020766667 | -1.738677778 | 0.299644173 |
| -1.1024      | -1.824277778 | 0.282382428 |
| -0.793933333 | -1.843877778 | 0.278572012 |
| -1.099766667 | -1.905455556 | 0.26693205  |
| -0.469733333 | -2.032866667 | 0.244369025 |
| -0.564166667 | -2.221844444 | 0.214367122 |
| -1.2427      | -2.276322222 | 0.206423307 |
| -0.705166667 | -2.315088889 | 0.200950366 |
| -1.092366667 | -2.318733333 | 0.200443379 |
| -1.2229      | -2.336333333 | 0.198012947 |
| -1.290133333 | -2.366077778 | 0.193972256 |
| -1.256566667 | -2.379822222 | 0.192133072 |
| -1.331366667 | -2.396455556 | 0.189930624 |

|              |              |             |
|--------------|--------------|-------------|
| -1.314366667 | -2.415722222 | 0.187411031 |
| -1.313       | -2.442111111 | 0.184014185 |
| -1.3044      | -2.447188889 | 0.183367659 |
| -1.343666667 | -2.452144444 | 0.182738884 |
| -1.379133333 | -2.471688889 | 0.180279981 |
| -0.9896      | -2.475811111 | 0.179765601 |
| -1.3781      | -2.525877778 | 0.173634101 |
| -1.304466667 | -2.574177778 | 0.167917235 |
| -1.4384      | -2.579577778 | 0.167289897 |
| -1.459666667 | -2.584011111 | 0.166776612 |
| -1.4601      | -2.628577778 | 0.161703434 |
| -1.550166667 | -2.745311111 | 0.149134804 |

|              | Skmel-28 sample 1 | Skmel-28 sample 2 | Skmel-28 sample 3 | Skmel-28R sample 1 |
|--------------|-------------------|-------------------|-------------------|--------------------|
| IL1B         | -2.4978           | -2.238066667      | -2.353766667      | 4.460266667        |
| LOC652683    | -3.006333333      | -2.9722           | -2.931766667      | 3.4892             |
| SPANXA2      | -3.130666667      | -3.126766667      | -2.900333333      | 3.262033333        |
| LOC100133171 | -2.833433333      | -2.905966667      | -2.755033333      | 3.421733333        |
| SPANXB1      | -2.750266667      | -2.831066667      | -2.969533333      | 3.224466667        |
| SPANXC       | -2.6556           | -2.681066667      | -2.743466667      | 3.384333333        |
| SPANXA1      | -2.680433333      | -2.711066667      | -2.617833333      | 3.299933333        |
| BASP1        | -2.677766667      | -2.6394           | -3.059566667      | 3.151466667        |
| SPANXB2      | -2.5352           | -2.522666667      | -2.552633333      | 3.115966667        |
| MMP3         | -2.5024           | -2.273733333      | -2.5456           | 3.189566667        |
| KRT81        | -2.372033333      | -2.240766667      | -2.571366667      | 2.841233333        |
| SERPINE1     | -1.717566667      | -1.866066667      | -1.785666667      | 3.5477             |
| SPANXE       | -2.3357           | -2.301833333      | -2.346233333      | 2.975166667        |
| STC1         | -1.9614           | -1.880433333      | -1.992966667      | 3.0162             |
| AXL          | -2.378133333      | -2.1548           | -2.663066667      | 2.528266667        |
| BEX1         | -1.9061           | -2.5818           | -4.1674           | 2.147133333        |
| TMEM200A     | -2.092666667      | -2.0428           | -2.254            | 2.7288             |
| TGM2         | -1.297866667      | -1.543033333      | -1.832766667      | 3.1638             |
| SCG5         | -2.014333333      | -2.187933333      | -2.589233333      | 2.6857             |
| DNER         | -2.2393           | -2.196166667      | -2.4801           | 2.142633333        |
| SRGN         | -2.122866667      | -2.220566667      | -2.0163           | 1.962033333        |
| CCL2         | -1.3562           | -1.6448           | -2.044633333      | 3.0131             |
| GLIPR1       | -1.392            | -1.355533333      | -1.502966667      | 2.720533333        |
| IL24         | -1.607466667      | -1.311833333      | -1.776733333      | 2.409066667        |
| TFPI2        | -1.7956           | -1.565966667      | -1.889766667      | 2.1474             |
| ANXA10       | -1.409066667      | -1.470333333      | -1.431333333      | 2.4195             |
| PAPPA        | -1.219333333      | -1.444166667      | -1.7766           | 2.2611             |
| VEGFC        | -1.482633333      | -1.9061           | -2.157566667      | 1.996766667        |
| ESM1         | -0.262266667      | -0.140566667      | -0.1904           | 3.386366667        |
| PODXL        | -0.7584           | -0.7423           | -0.824566667      | 2.926433333        |
| CT45A4       | -1.3663           | -1.348966667      | -1.295566667      | 2.150033333        |
| LOC646723    | -1.6794           | -1.65             | -1.8072           | 1.823666667        |
| LOC100134134 | -1.858866667      | -1.740766667      | -2.1773           | 1.5103             |
| FLJ40504     | -1.328933333      | -1.352733333      | -1.674166667      | 2.038466667        |
| PXDN         | -1.866266667      | -1.686166667      | -2.001333333      | 1.7431             |
| PAPSS2       | -1.8523           | -1.584766667      | -1.9484           | 1.690766667        |
| IL13RA2      | -0.5954           | -0.614366667      | -0.707033333      | 2.897133333        |
| ITGA5        | -1.354933333      | -1.234233333      | -1.662166667      | 2.080433333        |
| AKR1C3       | -1.786366667      | -1.746633333      | -1.764933333      | 1.770466667        |
| PTGS2        | -1.213066667      | -1.355166667      | -1.054866667      | 2.3676             |
| TNFRSF11B    | -1.308966667      | -1.2611           | -1.6576           | 2.0101             |
| KRT18P13     | -1.307133333      | -1.331733333      | -1.5346           | 1.776833333        |
| COL5A1       | -1.4975           | -1.577033333      | -1.927966667      | 1.454866667        |
| CSF2         | -0.342933333      | -0.272633333      | -0.374733333      | 3.226366667        |
| WNT5A        | -1.300233333      | -1.187233333      | -1.303366667      | 1.911333333        |
| TPBG         | -1.452233333      | -1.390633333      | -1.4969           | 1.7386             |

|              |              |              |              |             |
|--------------|--------------|--------------|--------------|-------------|
| FOXD1        | -0.907133333 | -1.1909      | -1.613033333 | 1.830133333 |
| C15orf48     | -1.1201      | -1.123533333 | -1.153766667 | 1.4445      |
| TGFB1        | -0.0811      | -0.761033333 | -2.006733333 | 2.031766667 |
| SOX9         | -1.343933333 | -1.2303      | -1.313       | 1.7935      |
| CPA4         | -1.238466667 | -1.227       | -2.358266667 | 1.204633333 |
| IL8          | -1.321266667 | -0.4827      | -2.0895      | 1.737433333 |
| ANXA8        | -0.965933333 | -0.878633333 | -0.943033333 | 2.2038      |
| CALB2        | -1.512133333 | -1.4482      | -1.582266667 | 1.605766667 |
| PKIA         | -0.9717      | -1.0089      | -1.0003      | 1.768366667 |
| KYNU         | -1.397333333 | -1.338033333 | -1.565966667 | 1.442166667 |
| SNAP25       | -1.421366667 | -1.359433333 | -1.509666667 | 1.331533333 |
| FAM20C       | -0.992733333 | -1.018566667 | -1.063       | 1.626566667 |
| CYR61        | -0.264933333 | -2.198666667 | -3.7636      | 0.946566667 |
| VASN         | -1.318366667 | -1.447566667 | -1.706933333 | 1.575033333 |
| ODZ3         | -1.487733333 | -1.331666667 | -1.3239      | 1.3458      |
| RAC2         | -1.063       | -1.1244      | -1.160933333 | 1.594333333 |
| CD24         | -1.279066667 | -1.315933333 | -1.2089      | 1.2048      |
| GAS6         | -1.4274      | -1.240466667 | -1.503666667 | 1.167833333 |
| LAMB3        | -1.069066667 | -1.223       | -1.247333333 | 1.387333333 |
| 3-Mar        | -0.242966667 | -0.463333333 | -0.81        | 2.2071      |
| ALPK2        | -1.259966667 | -1.2767      | -1.263466667 | 1.6379      |
| CT45A1       | -0.806166667 | -0.752966667 | -0.848266667 | 1.698733333 |
| NRP1         | -1.0872      | -0.9484      | -1.764       | 1.2596      |
| SLC25A24     | -0.6418      | -0.3765      | -1.0402      | 1.986233333 |
| SPOCD1       | -1.0515      | -1.240266667 | -1.496233333 | 1.669666667 |
| STC2         | -1.407833333 | -1.6939      | -2.1208      | 1.031333333 |
| ADM          | -1.315466667 | -1.3592      | -1.241966667 | 1.2707      |
| NR2F1        | -0.973666667 | -1.339566667 | -1.6764      | 1.255833333 |
| ITGA11       | -1.388333333 | -1.2224      | -1.373966667 | 1.299466667 |
| ITGA3        | -1.0797      | -1.302266667 | -1.7296      | 1.1792      |
| COL4A5       | -1.029333333 | -1.180933333 | -1.060333333 | 1.2083      |
| VCAN         | -1.177533333 | -0.9718      | -1.225733333 | 1.404533333 |
| FLNB         | -1.018466667 | -1.2285      | -1.671166667 | 1.030833333 |
| ZNF175       | -0.464733333 | -0.511666667 | -0.457533333 | 1.9709      |
| LPHN2        | -1.483366667 | -1.226866667 | -1.2846      | 1.109766667 |
| AKR1C4       | -1.563133333 | -1.457166667 | -1.255       | 1.205566667 |
| NKX3-1       | -0.644166667 | -1.0191      | -1.412166667 | 1.6201      |
| SERPINB7     | -0.439433333 | -0.471033333 | -0.355633333 | 2.162833333 |
| LOC100134265 | -1.167666667 | -1.1427      | -1.181966667 | 1.322866667 |
| AGTR1        | -0.937266667 | -1.0126      | -0.967066667 | 1.500033333 |
| CXCL1        | -0.540833333 | -1.035533333 | -1.6444      | 1.351833333 |
| FAM167A      | -1.070366667 | -1.071933333 | -1.084466667 | 1.321966667 |
| LOC731895    | -1.234366667 | -1.163       | -1.228666667 | 1.024966667 |
| LOC728285    | 0.355433333  | 0.076833333  | -0.521366667 | 2.500933333 |
| AFP          | -0.916       | -0.894633333 | -0.925566667 | 1.529366667 |
| EFNB2        | -0.8088      | -0.745133333 | -0.865633333 | 1.7304      |
| HIST1H2BD    | -1.996333333 | -1.948633333 | -2.111933333 | 0.2803      |

|            |              |              |              |             |
|------------|--------------|--------------|--------------|-------------|
| IL7R       | -0.235933333 | -0.958066667 | -1.6045      | 1.475066667 |
| MT1X       | -1.025933333 | -0.991       | -0.9137      | 1.2563      |
| M160       | -1.3472      | -1.040866667 | -1.291433333 | 1.206766667 |
| TFPI       | -1.0491      | -1.0999      | -1.4189      | 1.1379      |
| SDC1       | -0.750466667 | -0.8114      | -0.717333333 | 1.479       |
| C8orf13    | -0.967733333 | -0.9453      | -0.9242      | 1.388133333 |
| SLC22A4    | -1.033       | -1.2484      | -1.235       | 1.283866667 |
| HIST2H2AA3 | -0.9347      | -1.037266667 | -1.047866667 | 1.4595      |
| PCLO       | -0.6776      | -0.760233333 | -0.7922      | 1.4387      |
| COL13A1    | -0.4804      | -0.3525      | -0.796233333 | 1.606133333 |
| PDGFC      | -0.878733333 | -0.8264      | -1.107566667 | 1.3595      |
| ADAMTS1    | -0.261533333 | -0.712       | -1.0095      | 1.783766667 |
| ANTXR2     | -0.479466667 | -0.576466667 | -0.541866667 | 1.7239      |
| SEL1L3     | -1.243733333 | -1.314066667 | -1.222766667 | 0.871233333 |
| CITED2     | -1.385366667 | -1.493166667 | -1.5858      | 0.7719      |
| NUAK1      | -0.367166667 | -1.457466667 | -1.939566667 | 1.1839      |
| CCL5       | -0.977266667 | -0.957666667 | -0.986166667 | 1.007433333 |
| PTPRR      | -1.1979      | -1.157633333 | -1.105466667 | 1.2936      |
| HIST1H2AC  | -1.394966667 | -1.564366667 | -1.8014      | 0.6192      |
| MT1G       | -0.473933333 | -0.1933      | -0.438933333 | 1.627333333 |
| PID1       | -0.947066667 | -0.683066667 | -0.9837      | 1.244333333 |
| DDAH1      | -0.448133333 | -0.504633333 | -1.163133333 | 1.435666667 |
| ANKRD1     | 0.203533333  | -0.576066667 | -1.1075      | 1.7127      |
| OGFRL1     | -0.412533333 | -0.6357      | -0.732466667 | 1.385       |
| RFTN1      | -0.558066667 | -0.6133      | -0.909633333 | 1.399966667 |
| KRT18      | -0.8815      | -0.862833333 | -1.0519      | 1.1528      |
| RRAS       | -1.246666667 | -1.112766667 | -1.4525      | 0.680266667 |
| AJAP1      | -0.688133333 | -0.5967      | -0.668866667 | 1.295333333 |
| MET        | -1.069633333 | -1.226133333 | -1.217533333 | 0.736966667 |
| LOC441019  | -0.396933333 | -0.2999      | -0.351366667 | 1.6059      |
| SPOCK1     | -0.865366667 | -1.110533333 | -1.697266667 | 0.886933333 |
| CKAP4      | -1.615       | -1.373933333 | -1.744933333 | 0.259933333 |
| ELL2       | -0.5806      | -0.7574      | -1.154533333 | 1.2475      |
| TMEM158    | -0.329566667 | -0.340666667 | -0.517733333 | 1.7022      |
| MLLT11     | -0.788       | -0.930233333 | -1.052033333 | 1.1762      |
| DUSP1      | -0.416433333 | -0.5848      | -0.500133333 | 1.559766667 |
| IRF1       | -0.852266667 | -1.0592      | -1.164733333 | 1.265066667 |
| PLAUR      | -0.208766667 | -0.4655      | -0.988533333 | 1.501933333 |
| IGFBP7     | -1.179366667 | -1.092133333 | -1.295333333 | 0.8154      |
| KRT18P17   | -0.829866667 | -0.833033333 | -0.851033333 | 0.984933333 |
| LOC653506  | -1.246733333 | -1.264433333 | -1.218066667 | 0.7504      |
| TPM1       | -0.323066667 | -0.736633333 | -1.6597      | 1.035433333 |
| PHLDB2     | -0.495366667 | -0.8555      | -1.179233333 | 1.137066667 |
| SP140      | -0.5633      | -0.650933333 | -0.4268      | 1.384466667 |
| RGS17      | -0.789333333 | -0.584866667 | -0.708566667 | 1.3351      |
| HBEGF      | 0.081066667  | -0.081233333 | 0.017266667  | 2.081933333 |
| SEMA3C     | -0.9734      | -1.260433333 | -1.543933333 | 0.6354      |

|            |              |              |              |             |
|------------|--------------|--------------|--------------|-------------|
| DRAM1      | -0.774033333 | -0.698066667 | -0.7673      | 1.123066667 |
| MTE        | -0.321433333 | -0.229066667 | -0.6162      | 1.445666667 |
| LFNG       | -0.555933333 | -0.7911      | -0.8133      | 1.397433333 |
| ITGA2      | -0.062033333 | -0.044233333 | -0.999433333 | 1.379566667 |
| CT45A5     | -0.531533333 | -0.476866667 | -0.5694      | 1.237733333 |
| EGFR       | -0.7672      | -0.8801      | -0.799066667 | 1.207966667 |
| ODC1       | -0.605266667 | -0.548966667 | -0.7899      | 1.243333333 |
| ARHGAP22   | -0.597566667 | -0.4901      | -0.588       | 1.343533333 |
| C15orf52   | -0.592733333 | -0.848566667 | -1.068066667 | 1.089066667 |
| LOC654103  | -0.664033333 | -0.835466667 | -0.891566667 | 1.207466667 |
| LUM        | -1.0817      | -1.0489      | -0.7865      | 1.005366667 |
| MMP1       | -0.8321      | -0.715266667 | -1.2244      | 0.890666667 |
| DKK1       | -0.235366667 | -1.110533333 | -2.394966667 | 0.656233333 |
| HLA-B      | -1.037733333 | -1.0139      | -1.086033333 | 0.787633333 |
| MIR302C    | -0.378333333 | -0.265133333 | -0.578       | 1.348366667 |
| CLDN1      | -0.337233333 | -0.6121      | -0.7745      | 1.244466667 |
| AKR1B1     | -1.008633333 | -1.100933333 | -1.097066667 | 0.8389      |
| TMEM132A   | -1.000433333 | -0.939266667 | -0.917766667 | 0.898033333 |
| ANGPTL4    | 1.2096       | 0.428633333  | -1.236033333 | 1.763066667 |
| DSE        | -0.768466667 | -0.9613      | -1.047       | 1.071166667 |
| FSCN1      | -0.529766667 | -0.5768      | -1.200966667 | 1.0124      |
| EFEMP1     | -0.8528      | -0.983866667 | -0.933933333 | 0.811733333 |
| CD163L1    | -0.9273      | -0.992966667 | -0.9196      | 0.874966667 |
| SRPX2      | -0.807333333 | -0.831933333 | -0.872966667 | 0.8536      |
| LOC338758  | -1.013066667 | -1.013066667 | -0.950133333 | 0.8265      |
| ITGA1      | -1.057166667 | -0.920933333 | -1.098233333 | 0.709       |
| NCRNA00085 | -1.218033333 | -1.3413      | -1.018033333 | 0.5439      |
| EPHA2      | -0.334033333 | -0.234833333 | -0.3632      | 1.540033333 |
| SCML1      | -0.814933333 | -0.771166667 | -0.647266667 | 1.1315      |
| IRAK2      | -0.5812      | -0.6108      | -0.8067      | 1.2198      |
| FZD2       | -0.7926      | -0.960333333 | -1.290766667 | 0.7875      |
| BCAS4      | -0.926766667 | -0.9237      | -0.9097      | 0.826633333 |
| GALNTL4    | -0.7466      | -0.6473      | -1.0188      | 0.912533333 |
| EPAS1      | -1.720633333 | -1.62        | -1.214466667 | 0.358833333 |
| NTN4       | -0.8652      | -0.927066667 | -0.982633333 | 0.7935      |
| VEGFA      | -0.571233333 | -0.8119      | -0.979033333 | 0.9428      |
| NRG1       | 0.009133333  | -0.258666667 | -0.875433333 | 1.2958      |
| LARP6      | -1.372633333 | -1.569933333 | -1.8053      | 0.1112      |
| FOXA1      | -0.346366667 | -0.416566667 | -0.4822      | 1.264766667 |
| LOC653778  | -0.769633333 | -0.788133333 | -0.8815      | 1.016033333 |
| BDNF       | -0.412866667 | -0.5909      | -0.667133333 | 1.122133333 |
| LOC401074  | -0.825533333 | -0.737766667 | -0.8312      | 0.905266667 |
| SLIT2      | -0.8503      | -0.9285      | -0.787533333 | 0.764533333 |
| S100A16    | -0.197466667 | -0.355166667 | -0.602266667 | 1.273466667 |
| NEXN       | -0.778733333 | -0.824833333 | -0.675766667 | 1.1359      |
| CTSB       | -1.401533333 | -1.065866667 | -1.038133333 | 0.4738      |
| F3         | -0.1214      | -0.401233333 | -0.787166667 | 1.3274      |

|            |              |              |              |             |
|------------|--------------|--------------|--------------|-------------|
| TLE4       | -0.7895      | -0.770466667 | -0.8014      | 0.998666667 |
| LOC399965  | -0.590866667 | -0.7861      | -0.6861      | 0.918766667 |
| PTGES      | -0.602633333 | -0.5761      | -0.743       | 0.6209      |
| GPAM       | -0.740866667 | -1.150866667 | -1.131733333 | 0.787466667 |
| HIST1H2BK  | -1.0919      | -1.060033333 | -1.118533333 | 0.6011      |
| KCNMA1     | -1.3707      | -1.320733333 | -1.3305      | 0.3737      |
| HIST2H2AA4 | -0.797966667 | -0.779466667 | -0.640066667 | 1.0393      |
| CD82       | -0.452833333 | -0.466633333 | -0.609933333 | 1.322866667 |
| QSOX1      | -1.116666667 | -1.190066667 | -1.1924      | 0.486966667 |
| STMN3      | -0.2963      | -0.634066667 | -0.802766667 | 1.0554      |
| PVRL3      | -0.5578      | -0.4091      | -0.669733333 | 0.933533333 |
| TNFRSF21   | -0.376133333 | -0.1861      | -0.440833333 | 1.496666667 |
| TSC22D1    | -0.802966667 | -0.887866667 | -1.2573      | 0.811066667 |
| PAM        | -1.508333333 | -1.545866667 | -1.389633333 | 0.100733333 |
| TRIM8      | -0.5779      | -0.731266667 | -0.7623      | 0.979566667 |
| VGLL2      | -0.7938      | -0.7573      | -0.871033333 | 0.932066667 |
| SLC12A8    | -0.710666667 | -0.783966667 | -1.4487      | 0.788266667 |
| LPAR1      | -0.7607      | -0.778766667 | -0.838433333 | 0.626266667 |
| CHST7      | -0.901       | -0.779333333 | -0.861866667 | 0.787266667 |
| LOC653580  | -0.560866667 | -0.5705      | -0.620166667 | 1.059166667 |
| AIG1       | -1.261933333 | -1.178533333 | -1.199033333 | 0.2739      |
| ALCAM      | -0.437933333 | -0.620866667 | -1.2749      | 0.739       |
| MYADM      | -0.0185      | -0.633066667 | -1.1859      | 1.088833333 |
| FPR1       | -0.7988      | -0.477133333 | -0.6754      | 0.525366667 |
| FGF2       | -0.572233333 | -0.6246      | -0.7745      | 1.0118      |
| GFPT2      | -0.241       | -0.284066667 | -0.312066667 | 1.2041      |
| FYB        | -0.972766667 | -0.7788      | -0.654133333 | 1.136233333 |
| C20orf100  | -0.784433333 | -0.463866667 | -0.663133333 | 0.873866667 |
| TNIP1      | -0.627       | -0.7038      | -0.656866667 | 0.9235      |
| IL6ST      | -0.724433333 | -0.5335      | -0.632366667 | 0.796433333 |
| C5orf46    | -0.198833333 | -0.238133333 | -0.222566667 | 1.336066667 |
| LASS6      | -0.683633333 | -0.448666667 | -0.694833333 | 0.776533333 |
| HIPK2      | -0.666766667 | -0.5798      | -1.210166667 | 0.602466667 |
| METRNL     | -0.827133333 | -0.945533333 | -0.996066667 | 0.635566667 |
| BIRC3      | -0.322733333 | -0.2961      | -0.397833333 | 1.254566667 |
| JUN        | 0.137933333  | -0.7401      | -1.529433333 | 0.9702      |
| LIF        | 0.179666667  | -0.0438      | -0.0701      | 1.9198      |
| MAFF       | -0.2034      | -0.125666667 | -0.431566667 | 1.127133333 |
| C17orf91   | -0.858       | -1.398366667 | -1.5279      | 0.293233333 |
| SPHK1      | -0.5487      | -0.441466667 | -0.3396      | 1.338866667 |
| SPARC      | -0.547566667 | -0.651666667 | -0.777733333 | 0.8532      |
| PRKAG2     | -0.4009      | -0.5321      | -0.747266667 | 0.865533333 |
| TSPAN5     | -0.516733333 | -0.362633333 | -0.341033333 | 0.9         |
| KLHL5      | -1.289333333 | -1.2964      | -1.0417      | 0.259433333 |
| KRT18P28   | -0.559733333 | -0.524033333 | -0.623966667 | 0.881966667 |
| LOC644760  | -0.798766667 | -0.776433333 | -0.560833333 | 0.895733333 |
| RGMB       | -0.586433333 | -0.352233333 | -0.486166667 | 1.0798      |

|              |              |              |              |             |
|--------------|--------------|--------------|--------------|-------------|
| IL1RL1       | -0.1715      | -0.1285      | -0.094066667 | 1.533466667 |
| TAGLN2       | -0.118466667 | -0.288266667 | -0.9648      | 1.084233333 |
| AADACL1      | -0.2286      | -0.2112      | -0.1924      | 1.248933333 |
| NFE2L3       | -0.571866667 | -0.3725      | -0.755466667 | 0.788833333 |
| HMGA1        | -0.0219      | -0.0289      | -0.443733333 | 1.295633333 |
| LCP1         | -0.7106      | -0.539133333 | -0.5566      | 0.9379      |
| RAI14        | -0.5694      | -0.633933333 | -0.659833333 | 0.866166667 |
| PLOD2        | -0.511833333 | -0.565533333 | -0.865466667 | 0.5279      |
| LOC653496    | -0.5407      | -0.679533333 | -0.673933333 | 0.859366667 |
| AXUD1        | -0.096133333 | -0.651766667 | -0.994066667 | 1.136866667 |
| PPARG        | -1.0089      | -0.942233333 | -0.982733333 | 0.463366667 |
| KRT80        | -0.131833333 | -0.287       | -0.738066667 | 1.013033333 |
| PMEP A1      | 0.464566667  | -0.196866667 | -1.320733333 | 1.359566667 |
| MPP4         | 0.208        | -0.0388      | -0.5655      | 1.385366667 |
| ACOT7        | -0.539633333 | -0.877333333 | -1.149933333 | 0.504833333 |
| PARP8        | -0.4476      | -0.560966667 | -0.591633333 | 0.913       |
| SMTN         | 0.085966667  | 0.106533333  | -0.247333333 | 1.357733333 |
| CBX5         | -0.267566667 | -0.543466667 | -0.922966667 | 0.689133333 |
| NRIP3        | -0.426233333 | -0.3084      | -0.179466667 | 1.051566667 |
| FTH1         | -1.313166667 | -1.2565      | -1.434033333 | 0.0752      |
| LOC100216001 | -0.022866667 | 0.044133333  | -0.0619      | 1.517733333 |
| STEAP3       | -0.624766667 | -0.7093      | -0.839933333 | 0.763366667 |
| EVI1         | -0.662033333 | -0.602       | -0.640733333 | 0.700033333 |
| KIAA1671     | -0.621633333 | -0.820533333 | -0.881566667 | 0.603633333 |
| MTHFD2L      | -0.4761      | -0.5029      | -0.534866667 | 1.0704      |
| BCL2L1       | -0.2918      | -0.568666667 | -0.316533333 | 0.9832      |
| LOC100132510 | -0.4824      | -0.5738      | -0.7018      | 0.7465      |
| STEAP1       | -0.301633333 | -0.260466667 | -0.213333333 | 1.229533333 |
| CAST         | -1.0732      | -0.945166667 | -0.968333333 | 0.4859      |
| NTM          | -0.1198      | -0.0538      | -1.110133333 | 0.839866667 |
| GADD45B      | -0.507466667 | -0.8334      | -0.885066667 | 0.8407      |
| IL6          | -0.548633333 | -0.468266667 | -0.497233333 | 0.943766667 |
| HIST1H1C     | -0.5757      | -0.587333333 | -0.577366667 | 0.853166667 |
| MT2A         | -0.3431      | -0.271466667 | -0.437066667 | 1.009366667 |
| OXTR         | -0.1388      | -0.531       | -0.556766667 | 1.075333333 |
| PTPRF        | -0.1984      | -0.231633333 | -1.064766667 | 0.755666667 |
| TBX3         | -0.6587      | -0.550433333 | -0.6379      | 0.8278      |
| CDKN1A       | -0.718466667 | -0.871966667 | -0.7521      | 0.7834      |
| NPTX2        | -0.7386      | -0.6978      | -0.513266667 | 0.809966667 |
| CFH          | -0.676366667 | -0.915666667 | -0.809733333 | 0.479233333 |
| COL12A1      | -0.515866667 | -0.641733333 | -0.8872      | 0.705966667 |
| P4HA2        | -0.663333333 | -0.7482      | -1.026933333 | 0.586666667 |
| HCG3         | -0.427566667 | -0.3554      | -0.366233333 | 1.105666667 |
| RRAS2        | -0.461933333 | -0.634633333 | -0.6824      | 0.806366667 |
| GLRX         | -0.364933333 | -0.4772      | -0.546566667 | 0.870866667 |
| FHL1         | -0.830166667 | -0.8347      | -0.775533333 | 0.443833333 |
| CDA          | -0.662866667 | -0.459933333 | -0.621633333 | 0.840233333 |



|           |              |              |              |             |
|-----------|--------------|--------------|--------------|-------------|
| C6orf141  | -0.585866667 | -0.704366667 | -0.7299      | 0.751933333 |
| SDC4      | -0.561533333 | -0.9497      | -1.286966667 | 0.388866667 |
| LOC340598 | -0.491033333 | -0.511766667 | -0.538333333 | 0.791333333 |
| CDH13     | -0.813166667 | -0.845333333 | -0.948033333 | 0.557766667 |
| SLC16A3   | -0.1606      | -0.1683      | -0.638933333 | 0.700733333 |
| LYPD6     | -0.2881      | -0.5053      | -0.498933333 | 0.840133333 |
| NETO2     | -0.090233333 | -0.1528      | -0.305       | 1.138866667 |
| C5orf13   | -1.071533333 | -1.215266667 | -1.459       | 0.280066667 |
| NRIP1     | -0.349133333 | -0.272166667 | -0.1495      | 0.8807      |
| AIF1L     | -1.0487      | -1.1979      | -0.920033333 | 0.264966667 |
| DPYD      | -0.437966667 | -0.397833333 | -0.653166667 | 0.687933333 |
| MME       | -0.640466667 | -0.812666667 | -0.6082      | 0.6339      |
| ARL4A     | -0.7313      | -0.821833333 | -0.849866667 | 0.368133333 |
| IRS1      | -0.2603      | -0.509766667 | -0.929633333 | 0.744733333 |
| COL4A1    | -0.5577      | -0.7584      | -1.143033333 | 0.5521      |
| VCL       | -0.265833333 | -0.538933333 | -0.602133333 | 0.841233333 |
| TM4SF19   | -0.2563      | -0.398733333 | -0.330366667 | 1.073366667 |
| JAKMIP2   | -0.820033333 | -0.8004      | -0.841       | 0.509366667 |
| SERINC2   | -0.494633333 | -0.324466667 | -0.385333333 | 0.887566667 |
| LZTFL1    | -0.848766667 | -0.9009      | -1.0145      | 0.410933333 |
| GADD45A   | -0.688733333 | -1.084633333 | -1.067266667 | 0.5395      |
| C21orf7   | 0.161633333  | -0.277166667 | -0.8459      | 1.170233333 |
| DTWD1     | -0.372033333 | -0.600166667 | -1.1071      | 0.663033333 |
| TEAD2     | -1.078733333 | -0.989       | -0.7636      | 0.323       |
| STX1A     | -0.1478      | -0.1372      | -0.324833333 | 1.052166667 |
| NME7      | -0.5435      | -0.485233333 | -0.579733333 | 0.731266667 |
| LOC729086 | -0.380366667 | -0.182066667 | -0.773766667 | 0.816533333 |
| HIST1H4H  | -0.895566667 | -0.842066667 | -0.8743      | 0.551433333 |
| RASA1     | -0.222933333 | -0.637166667 | -0.739466667 | 0.773833333 |
| DTNA      | -0.905066667 | -0.7472      | -0.548333333 | 0.598666667 |
| MGST1     | -0.648966667 | -0.759633333 | -0.569533333 | 0.599233333 |
| PTGR1     | -0.8596      | -0.908666667 | -0.825666667 | 0.4114      |
| LOC643319 | 0.004533333  | -0.456766667 | -0.704466667 | 0.945833333 |
| UCA1      | -0.567566667 | -0.485166667 | -0.5068      | 0.653766667 |
| LOC653110 | -0.1515      | -0.249733333 | -0.3097      | 1.260933333 |
| ENPP2     | -0.8427      | -0.754833333 | -0.680166667 | 0.519433333 |
| KLF2      | 0.340266667  | -0.397666667 | -0.066       | 1.320633333 |
| TBL1X     | -0.700966667 | -0.7754      | -0.831033333 | 0.260666667 |
| ERAP2     | -0.7306      | -0.5208      | -0.5576      | 0.678933333 |
| BMP2      | -0.246366667 | -0.535566667 | -1.000866667 | 0.742366667 |
| SLC38A2   | -1.0448      | -1.128933333 | -1.1618      | 0.121866667 |
| MGMT      | -1.003166667 | -0.87        | -0.876866667 | 0.246766667 |
| IL4R      | -0.263866667 | -0.320233333 | -0.249933333 | 1.068966667 |
| DFNA5     | -1.000033333 | -1.0168      | -1.010833333 | 0.184466667 |
| TOX2      | -0.480833333 | -0.351833333 | -0.509766667 | 0.6847      |
| CYP26B1   | -0.5297      | -0.479833333 | -0.5433      | 0.7671      |
| HPCAL1    | -0.362166667 | -0.468366667 | -0.759066667 | 0.822366667 |

|           |              |              |              |              |
|-----------|--------------|--------------|--------------|--------------|
| CAMK2G    | -0.477233333 | -0.502766667 | -0.628966667 | 0.6979       |
| SEMA3A    | -0.684066667 | -0.719733333 | -0.7501      | 0.348133333  |
| SERPINB8  | 0.002233333  | -0.110033333 | -0.346133333 | 1.099766667  |
| FAR1      | -0.7256      | -0.545833333 | -0.494566667 | 0.511933333  |
| HOMER3    | -0.622       | -0.749566667 | -1.0169      | 0.433        |
| IL11      | 0.031766667  | -0.204533333 | -0.115466667 | 1.200466667  |
| DCBLD2    | -0.179066667 | 0.024266667  | -0.335666667 | 0.9745       |
| MXD4      | -1.121966667 | -1.273833333 | -1.229766667 | -0.013333333 |
| ZYX       | -0.175433333 | -0.682166667 | -1.1015      | 0.6468       |
| ITGB1     | -0.623533333 | -0.7809      | -0.725633333 | 0.42         |
| TXNRD1    | -0.401033333 | -0.782366667 | -1.049433333 | 0.542733333  |
| PPA2      | -1.164       | -1.0508      | -0.929966667 | 0.127133333  |
| GLRB      | -0.407266667 | -0.4177      | -0.496       | 0.755566667  |
| RAB31     | -0.552266667 | -0.880733333 | -1.024533333 | 0.465433333  |
| CYBASC3   | -1.2811      | -1.142733333 | -0.901133333 | 0.2562       |
| TGFBR2    | -0.346666667 | -0.235366667 | -0.593733333 | 0.768466667  |
| MT1A      | -0.3947      | -0.248466667 | -0.398933333 | 0.8354       |
| TNFRSF12A | 0.4699       | -0.077866667 | -1.340233333 | 0.906666667  |
| GABARAPL1 | -0.8412      | -1.183466667 | -1.100133333 | 0.182733333  |
| TRIM6     | -0.564166667 | -0.502366667 | -0.3979      | 0.564633333  |
| DPYSL3    | -0.626466667 | -0.614966667 | -0.490433333 | 0.683966667  |
| GALNT10   | -0.331666667 | -0.322666667 | -0.453666667 | 0.787766667  |
| PHLDA2    | 0.054133333  | 0.074766667  | -0.033666667 | 1.373866667  |
| DDIT3     | -1.252933333 | -1.258866667 | -1.135033333 | 0.077933333  |
| E2F7      | -0.401733333 | -0.356166667 | -0.2371      | 0.8741       |
| CEBPB     | -0.778166667 | -0.921766667 | -0.4678      | 0.495466667  |
| ALDH3B1   | -0.7307      | -0.6514      | -0.788366667 | 0.359133333  |
| ATP2B1    | -0.525166667 | -0.4649      | -0.325633333 | 0.725733333  |
| SLC25A37  | -0.372666667 | -0.6742      | -0.756133333 | 0.560566667  |
| S100A3    | -0.447966667 | -0.7089      | -0.944566667 | 0.4685       |
| CCDC92    | -1.006933333 | -1.093733333 | -1.136233333 | -0.027633333 |
| PDLIM1    | -0.5809      | -0.504766667 | -0.985933333 | 0.426966667  |
| GBP2      | -0.738       | -0.722566667 | -0.439933333 | 0.419033333  |
| TICAM2    | -0.515766667 | -0.204933333 | -0.653033333 | 0.643966667  |
| TSHZ3     | -0.4435      | -0.6698      | -0.598233333 | 0.5498       |
| MAPKAPK3  | -0.777666667 | -0.5993      | -0.5775      | 0.434633333  |
| S1PR1     | -0.448833333 | -0.4067      | -0.4762      | 0.680366667  |
| UBE2E2    | -0.4586      | -0.5862      | -0.534366667 | 0.5431       |
| LGALS8    | -0.510833333 | -0.752233333 | -0.7768      | 0.473966667  |
| MT1E      | -0.192433333 | -0.0584      | -0.224133333 | 0.8484       |
| TRQ1      | -0.044933333 | -0.157866667 | -0.162766667 | 1.0093       |
| MAP4K4    | -0.387433333 | -0.303033333 | -0.270266667 | 0.744333333  |
| HLX       | -0.531966667 | -0.5395      | -0.5733      | 0.743133333  |
| GPR177    | -0.663466667 | -0.585       | -0.644933333 | 0.594866667  |
| F2RL2     | -0.580833333 | -0.5126      | -0.543333333 | 0.582566667  |
| TCF4      | -0.364233333 | -0.4666      | -0.466966667 | 0.698266667  |
| MGC87042  | -0.025833333 | -0.0403      | -0.305433333 | 1.060533333  |

|           |              |              |              |              |
|-----------|--------------|--------------|--------------|--------------|
| ANTXR1    | -1.074933333 | -1.111866667 | -0.7969      | 0.056966667  |
| HRH1      | -0.4324      | -0.4595      | -0.2292      | 0.6535       |
| FAM107B   | -0.39        | -0.3946      | -0.392866667 | 0.7354       |
| DKK3      | -0.295833333 | -0.3895      | -0.361166667 | 0.7957       |
| ADAMTS6   | -0.199766667 | -0.1399      | -0.1791      | 1.075533333  |
| MMD       | -0.304433333 | -0.225133333 | -0.1381      | 0.7872       |
| NEDD4L    | -0.170833333 | -0.009533333 | 0.1307       | 0.973466667  |
| CDC42EP3  | -0.111033333 | -0.467633333 | -0.529966667 | 0.902533333  |
| GNB5      | -0.6988      | -0.448166667 | -0.695033333 | 0.378866667  |
| DAP       | -0.2875      | -0.516       | -0.4671      | 0.667966667  |
| S100A6    | -0.430533333 | -0.481433333 | -0.703866667 | 0.639033333  |
| ZSWIM4    | -0.3956      | -0.479633333 | -0.4084      | 0.6881       |
| UFM1      | -0.4602      | -0.302       | -0.622666667 | 0.487366667  |
| PPAPDC1A  | -0.180733333 | -0.543733333 | -0.865566667 | 0.5545       |
| FUT8      | -0.6706      | -0.5029      | -0.4633      | 0.3679       |
| MGLL      | -0.099       | -0.2041      | -0.335733333 | 1.106966667  |
| LIMCH1    | -0.617766667 | -0.681233333 | -0.910566667 | 0.211033333  |
| ATG7      | -0.2686      | -0.217033333 | -0.624066667 | 0.671433333  |
| ADK       | -0.350333333 | -0.2868      | -0.607666667 | 0.670033333  |
| PAK2      | -0.2202      | -0.1743      | -0.559533333 | 0.644466667  |
| NFKBIZ    | -0.610233333 | -0.625233333 | -0.072666667 | 0.303466667  |
| GNG11     | -0.324733333 | -0.477166667 | -0.7522      | 0.461666667  |
| RAB3IP    | -0.2826      | -0.4242      | -0.367833333 | 0.751866667  |
| SLC2A4RG  | -0.3911      | -0.354566667 | -0.496166667 | 0.634366667  |
| CPXM1     | 0.1266       | -0.0859      | -0.396166667 | 0.962733333  |
| ITPRIP    | -0.1291      | -0.354933333 | -0.555       | 0.774        |
| CLCF1     | -0.373166667 | -0.3514      | -0.339466667 | 0.765        |
| PARP3     | -0.9761      | -1.011233333 | -1.1404      | 0.0315       |
| ID1       | -0.8221      | -0.420166667 | -0.256133333 | -0.013833333 |
| AKR1B10   | -0.4779      | -0.417866667 | -0.6821      | 0.640533333  |
| PRDM1     | -0.109166667 | -0.134033333 | -0.094166667 | 0.874366667  |
| PHF11     | -0.4751      | -0.4417      | -0.641033333 | 0.660133333  |
| GNA12     | -0.3393      | -0.3211      | -0.3922      | 0.695666667  |
| SNX24     | -0.116666667 | -0.1813      | -0.714266667 | 0.671666667  |
| IFP38     | -0.754566667 | -0.645066667 | -0.826966667 | 0.2938       |
| COL6A1    | -0.758366667 | -0.597166667 | -0.6559      | 0.4598       |
| EHD2      | -0.538566667 | -0.508033333 | -0.623666667 | 0.431566667  |
| ARF4      | -0.357966667 | -0.621366667 | -0.650266667 | 0.4202       |
| UGCG      | -0.867466667 | -0.741566667 | -0.577533333 | 0.268066667  |
| ANKRD13A  | -0.024433333 | -0.3062      | -0.440366667 | 0.800533333  |
| LOC399959 | 0.070533333  | 0.0535       | -0.7076      | 0.704966667  |
| SMAD3     | -0.4065      | -0.438966667 | -0.678066667 | 0.500433333  |
| NEDD4     | -0.3937      | -0.3701      | -0.3853      | 0.694433333  |
| PINK1     | -0.983233333 | -0.909066667 | -1.017266667 | 0.0789       |
| LOC387882 | -0.032266667 | -0.0491      | -0.6318      | 0.8606       |
| SPINK1    | -0.736566667 | -0.918766667 | -0.639633333 | 0.367933333  |
| ISG15     | -0.656166667 | -0.517033333 | -0.300433333 | 0.444        |

|           |              |              |              |              |
|-----------|--------------|--------------|--------------|--------------|
| TMEM42    | -1.0527      | -0.852       | -0.9409      | 0.029366667  |
| CDR2L     | -0.429233333 | -0.305866667 | -0.4443      | 0.597966667  |
| PTPRK     | -0.456966667 | -0.458766667 | -0.6644      | 0.748466667  |
| UBE2H     | -1.075033333 | -0.906933333 | -0.938533333 | -0.1091      |
| NLRP3     | 0.2886       | 0.0851       | 0.049166667  | 1.154133333  |
| NAP1L1    | -0.666566667 | -0.676666667 | -0.7967      | 0.338333333  |
| PHLDA1    | -0.251633333 | -0.050733333 | 0.167833333  | 0.8138       |
| MAP1B     | -0.143       | -0.2748      | -1.091366667 | 0.356833333  |
| FOXP1     | -0.2718      | -0.401833333 | -0.398966667 | 0.619066667  |
| RND3      | -0.063933333 | -0.419166667 | -0.9014      | 0.590966667  |
| GRAMD3    | 0.046833333  | -0.450566667 | -0.579633333 | 0.864633333  |
| PLD1      | -0.3771      | -0.2092      | -0.0848      | 0.6931       |
| RAPH1     | 0.316466667  | -0.194933333 | -0.529933333 | 0.691433333  |
| SNORA10   | -0.169833333 | -0.185666667 | -0.074466667 | 0.8979       |
| HES4      | -0.6887      | -0.5716      | -0.588       | 0.550566667  |
| FAM129B   | -0.166       | -0.125033333 | -0.1277      | 0.8574       |
| RALA      | -1.041766667 | -0.916566667 | -1.026566667 | 0.087233333  |
| IER3      | 0.189966667  | -0.401333333 | -0.460866667 | 0.798933333  |
| TIMP1     | -0.478966667 | -0.3867      | -0.8638      | 0.422733333  |
| MRPS24    | -0.539566667 | -0.7071      | -0.696766667 | 0.3145       |
| HS3ST3A1  | 0.353533333  | -0.037666667 | -0.168033333 | 1.084266667  |
| BET1      | -0.466366667 | -0.586166667 | -0.6323      | 0.291566667  |
| LOC642567 | -1.1779      | -0.8796      | -1.124       | -0.193066667 |
| RSPRY1    | -0.4747      | -0.498333333 | -0.592866667 | 0.508333333  |
| LOC730029 | -0.586233333 | -0.3475      | -0.625       | 0.3487       |
| SCG2      | -0.4174      | -0.5326      | -0.8328      | 0.3301       |
| DENND1A   | -0.120466667 | -0.098033333 | -0.152633333 | 0.727066667  |
| PLIN2     | -0.5584      | -0.396666667 | -0.3148      | 0.303566667  |
| YPEL5     | -0.872333333 | -1.180266667 | -0.9911      | 0.132666667  |
| TCEB2     | -0.336433333 | -0.450466667 | -0.5926      | 0.686066667  |
| ICAM1     | -0.3366      | -0.258666667 | -0.0802      | 0.680066667  |
| OPTN      | -1.034766667 | -1.087066667 | -0.8977      | 0.015733333  |
| TJP1      | -0.3532      | -0.557766667 | -0.5749      | 0.4484       |
| CES2      | -0.886266667 | -0.773566667 | -0.6784      | 0.2319       |
| RPL13     | -0.157133333 | -0.192433333 | -0.310133333 | 0.924166667  |
| LASP1     | -0.1944      | -0.441666667 | -0.8272      | 0.569033333  |
| GEM       | -0.218933333 | -0.668033333 | -0.8348      | 0.498033333  |
| TAPBP     | -0.8742      | -0.8133      | -0.866933333 | 0.1433       |
| TMEM2     | 0.1952       | -0.363766667 | -0.707266667 | 0.7295       |
| NT5E      | 0.087633333  | 0.008866667  | -0.059       | 0.884633333  |
| RBPJ      | -0.103866667 | -0.1574      | -0.226433333 | 0.730233333  |
| ERRFI1    | 0.238366667  | 0.038266667  | -0.724733333 | 0.8622       |
| KANK2     | -0.989866667 | -0.896566667 | -1.0402      | 0.029366667  |
| SNORD13   | -0.931833333 | -0.898933333 | -0.942966667 | -0.190066667 |
| TPST1     | -0.190633333 | -0.4963      | -0.691966667 | 0.511533333  |
| DCBLD1    | -0.170333333 | -0.121433333 | -0.104633333 | 0.8271       |
| IL15      | -0.492366667 | -0.4239      | -0.505866667 | 0.506766667  |

|           |              |              |              |              |
|-----------|--------------|--------------|--------------|--------------|
| TRIB3     | -0.6801      | -0.930366667 | -0.987833333 | 0.166166667  |
| TBC1D2    | -0.416133333 | -0.4028      | -0.436666667 | 0.485366667  |
| SHC1      | -0.288966667 | -0.3203      | -0.576933333 | 0.485066667  |
| TXNIP     | -0.269033333 | -0.636966667 | -0.947033333 | 0.379633333  |
| C4orf34   | -1.1669      | -0.8017      | -0.937466667 | -0.154333333 |
| SH3RF1    | 0.206833333  | -0.144466667 | -0.440833333 | 0.875966667  |
| HIST2H2AC | -0.4632      | -0.293       | -0.1623      | 0.739633333  |
| GBE1      | -0.4706      | -0.5888      | -0.602033333 | 0.289166667  |
| L1CAM     | -0.869466667 | -0.861033333 | -0.9923      | -0.009766667 |
| LOC727908 | -0.585566667 | -0.1969      | -0.321233333 | 0.050833333  |
| ZNF669    | -0.438966667 | -0.191933333 | -0.2975      | 0.4465       |
| TCF7      | -0.093533333 | -0.155       | -0.185166667 | 0.8346       |
| EEF1A2    | -0.520566667 | -0.351866667 | -0.507466667 | 0.252933333  |
| ANXA2P1   | -0.228033333 | -0.335066667 | -1.285966667 | 0.226466667  |
| LACTB     | -0.339766667 | -0.6455      | -0.659       | 0.471966667  |
| OBFC2A    | -0.1388      | -0.3054      | -0.1554      | 0.864533333  |
| B2M       | -0.720266667 | -0.9181      | -0.616566667 | 0.237433333  |
| MCFD2     | -0.282133333 | -0.436633333 | -0.358433333 | 0.545866667  |
| TPD52L2   | -0.287233333 | -0.366233333 | -0.654466667 | 0.463833333  |
| CRIM1     | -0.075233333 | -0.327366667 | -0.965533333 | 0.338466667  |
| HIST2H4A  | -0.548233333 | -0.5154      | -0.5587      | 0.331833333  |
| RARA      | -0.129833333 | -0.3471      | -0.553       | 0.5636       |
| BEND6     | -0.799566667 | -0.857366667 | -1.032533333 | 0.051933333  |
| LOC646463 | -0.512333333 | -0.456966667 | -0.788633333 | 0.2685       |
| LOC729009 | -0.931133333 | -0.861066667 | -1.0663      | -0.1797      |
| DNAJB4    | -0.742133333 | -0.649733333 | -0.861033333 | 0.2328       |
| SQSTM1    | -0.527466667 | -0.5149      | -0.406566667 | 0.4824       |
| MT1F      | -1.1721      | -0.9299      | -0.717966667 | -0.119133333 |
| AUTS2     | -0.4385      | -0.4799      | -0.525866667 | 0.428933333  |
| TACC2     | -0.192966667 | -0.050366667 | -0.201666667 | 0.8661       |
| FTHL3     | -1.0196      | -0.8725      | -0.964533333 | -0.003533333 |
| SMOX      | -0.442333333 | -0.631266667 | -0.673       | 0.510633333  |
| TDO2      | -0.426066667 | -0.346666667 | -0.585566667 | 0.726333333  |
| IFT20     | -0.7388      | -0.612233333 | -0.9752      | 0.0268       |
| IL13RA1   | -0.658       | -0.7181      | -0.668466667 | 0.1863       |
| RAB11FIP5 | -0.510733333 | -0.751766667 | -0.6938      | 0.2733       |
| LOC441506 | -0.6187      | -0.486766667 | -0.5071      | 0.3286       |
| PLK2      | -0.257666667 | -0.760533333 | -1.004333333 | 0.332066667  |
| EXT1      | -0.318033333 | -0.405466667 | -0.568633333 | 0.377666667  |
| FICD      | -0.297033333 | -0.036433333 | -0.505833333 | 0.523633333  |
| MPZL1     | -0.323866667 | -0.386133333 | -0.4168      | 0.456133333  |
| SAMD9L    | -0.616433333 | -0.418433333 | -0.603833333 | 0.442866667  |
| COL8A1    | -0.072566667 | -0.1122      | -0.889466667 | 0.462466667  |
| ZFAND2A   | -0.4706      | -0.6396      | -0.9616      | 0.248        |
| NGRN      | -0.309766667 | -0.564533333 | -0.539866667 | 0.412866667  |
| NFASC     | -0.548833333 | -0.496966667 | -0.6989      | 0.326366667  |
| KCNN4     | 0.0801       | -0.1693      | -0.219533333 | 0.771633333  |

|              |              |              |              |              |
|--------------|--------------|--------------|--------------|--------------|
| NFKBIA       | -0.772033333 | -0.634466667 | -0.5689      | -0.0262      |
| C6orf62      | -0.721333333 | -0.6688      | -0.7774      | 0.1135       |
| MAP3K5       | -0.2549      | -0.2747      | -0.467966667 | 0.443533333  |
| ETS2         | -0.439033333 | -0.3881      | -0.373233333 | 0.6515       |
| MAFB         | -0.881866667 | -0.7628      | -0.5653      | 0.1259       |
| HIST1H2BJ    | 0.0148       | -0.2065      | -0.329933333 | 0.7444       |
| SEC13        | -0.3496      | -0.5251      | -0.8494      | 0.330466667  |
| SERF2        | -0.842933333 | -0.832333333 | -0.8998      | -0.007033333 |
| STK39        | -0.516133333 | -0.315766667 | -0.4383      | 0.4241       |
| PRDX1        | -0.280766667 | -0.253       | -0.447833333 | 0.6094       |
| TRIOBP       | 0.071566667  | -0.146333333 | -0.0134      | 0.849633333  |
| LOC100131713 | -0.837433333 | -0.447166667 | -0.4807      | 0.260966667  |
| LOC100130009 | -0.031633333 | 0.036133333  | -0.314833333 | 0.674533333  |
| DHRS2        | -0.239833333 | -0.191766667 | -0.488633333 | 0.543533333  |
| CCL20        | 0.742366667  | 0.3218       | -0.246233333 | 0.928666667  |
| HIST1H2BC    | -0.3924      | -0.254566667 | -0.3413      | 0.558333333  |
| PXMP2        | -0.259333333 | -0.3235      | -0.333966667 | 0.606133333  |
| DOK5         | -0.875866667 | -0.6708      | -0.687866667 | 0.031033333  |
| MGAT1        | -0.444866667 | -0.4834      | -0.324766667 | 0.5275       |
| THAP10       | -0.464233333 | -0.258333333 | -0.489066667 | 0.559666667  |
| LOC100133211 | -0.153366667 | -0.222633333 | -0.400866667 | 0.430466667  |
| CD68         | -0.9255      | -0.8849      | -0.651333333 | -0.1045      |
| RAB13        | -0.6567      | -0.680533333 | -0.553033333 | 0.155466667  |
| CHIC2        | 0.182266667  | -0.1066      | -0.3225      | 0.929133333  |
| TUFT1        | -0.567233333 | -0.661933333 | -0.721766667 | 0.2773       |
| ARPM1        | -0.426       | -0.527966667 | -0.439366667 | 0.335633333  |
| VOPP1        | 0.044333333  | -0.130466667 | -0.217266667 | 0.7703       |
| GBP1         | -0.105866667 | -0.444266667 | -0.399233333 | 0.761333333  |
| CD151        | -0.272933333 | -0.276933333 | -0.420133333 | 0.553366667  |
| FTHL2        | -1.0022      | -0.462       | -1.076866667 | -0.1807      |
| RARRES3      | -0.7208      | -0.825733333 | -0.5293      | -0.096566667 |
| NAV3         | 0.450033333  | -0.0619      | -0.5316      | 0.892733333  |
| SAR1A        | -0.480133333 | -0.529366667 | -0.811033333 | 0.186866667  |
| ARRDC3       | -0.556833333 | -0.4575      | -0.4603      | 0.254133333  |
| FZD8         | -0.222966667 | -0.195766667 | -0.2473      | 0.551366667  |
| ZMIZ1        | -0.713966667 | -0.709566667 | -0.521266667 | 0.125566667  |
| LDHA         | -0.253166667 | -0.193166667 | -0.4843      | 0.217533333  |
| IGF2BP3      | -0.072633333 | -0.2637      | -0.0569      | 0.759233333  |
| TWF2         | -0.3085      | -0.3773      | -0.531433333 | 0.4734       |
| KRT10        | -0.313033333 | -0.336566667 | -0.4668      | 0.511766667  |
| MED10        | -0.1968      | -0.212033333 | -0.535633333 | 0.5758       |
| LOC652968    | -0.424666667 | -0.371166667 | -0.572666667 | 0.401066667  |
| NFIL3        | -0.912433333 | -0.872066667 | -0.646366667 | 0.016433333  |
| TCEA2        | -0.9004      | -0.886733333 | -0.774333333 | -0.1294      |
| CIB1         | -0.4137      | -0.417966667 | -0.6069      | 0.2739       |
| ABHD7        | -0.090466667 | -0.062766667 | -0.058033333 | 0.855066667  |
| SRXN1        | -0.271933333 | -0.470266667 | -0.9554      | 0.4719       |

|           |              |              |              |              |
|-----------|--------------|--------------|--------------|--------------|
| MAEA      | -0.284866667 | -0.500366667 | -0.3908      | 0.454733333  |
| RILPL2    | -0.454766667 | -0.437066667 | -0.4001      | 0.396333333  |
| ABHD5     | -0.188466667 | -0.203066667 | -0.208566667 | 0.746866667  |
| HCG18     | -0.304733333 | -0.356866667 | -0.4723      | 0.348666667  |
| NNMT      | -0.2068      | -0.553966667 | -0.711433333 | 0.360033333  |
| FAM174A   | -0.522233333 | -0.625833333 | -0.5879      | 0.291033333  |
| POPDC3    | -0.334733333 | -0.522366667 | -0.7839      | 0.286766667  |
| C10orf59  | -0.5791      | -0.601433333 | -0.4769      | 0.334333333  |
| GTF2F2    | -0.322633333 | -0.423133333 | -0.585433333 | 0.375733333  |
| CXCL2     | -0.3836      | -0.276033333 | -0.328       | 0.350633333  |
| TP53      | -0.707033333 | -0.4501      | -0.3802      | 0.2794       |
| HERC4     | -0.202633333 | -0.298933333 | -0.375566667 | 0.527333333  |
| UCHL3     | -0.153733333 | -0.268266667 | -0.214       | 0.587966667  |
| DAB2      | -0.794433333 | -0.702633333 | -0.5176      | 0.2198       |
| TNFAIP6   | -0.322833333 | -0.1247      | -0.5514      | 0.498333333  |
| ZIC2      | -0.135333333 | -0.358633333 | -0.5199      | 0.461333333  |
| CHMP2B    | -0.316       | -0.4986      | -0.385133333 | 0.443666667  |
| GCNT1     | -0.0631      | -0.238666667 | -0.628166667 | 0.366166667  |
| CD44      | -0.131566667 | -0.2377      | -0.701866667 | 0.493633333  |
| PPBP      | -0.151066667 | -0.301233333 | -0.231133333 | 0.685933333  |
| SNHG7     | -0.5989      | -1.006633333 | -1.022266667 | -0.031833333 |
| CMIP      | -0.280333333 | -0.259166667 | -0.258566667 | 0.4151       |
| PPP3CA    | -0.359666667 | -0.3099      | -0.281533333 | 0.438166667  |
| RIC8A     | -0.1518      | -0.325766667 | -0.608433333 | 0.536233333  |
| DUSP3     | -0.792133333 | -0.834333333 | -0.7118      | 0.0449       |
| SH3GL2    | -0.3273      | -0.3354      | -0.350733333 | 0.485733333  |
| ELMOD1    | -0.5819      | -0.4224      | -0.7581      | 0.182366667  |
| EGR1      | -0.214133333 | -0.892466667 | -0.149466667 | 0.729033333  |
| INHBE     | -0.5983      | -0.648233333 | -0.730066667 | 0.077        |
| SEC22B    | -0.389866667 | -0.441666667 | -0.455266667 | 0.293266667  |
| ZSWIM6    | -0.420633333 | -0.399766667 | -0.513433333 | 0.379266667  |
| HSPB3     | -0.342566667 | -0.3199      | -0.4018      | 0.743566667  |
| SEMA4B    | -0.5639      | -0.568566667 | -0.599933333 | 0.1729       |
| FHOD3     | 0.1717       | -0.1287      | -0.3558      | 0.593766667  |
| SAMD9     | -0.6803      | -0.603       | -0.365666667 | 0.1384       |
| C16orf57  | 0.0078       | -0.039066667 | -0.158866667 | 0.7289       |
| YIPF5     | -0.6121      | -0.621533333 | -0.715366667 | -0.028966667 |
| RIPK2     | -0.268866667 | -0.371633333 | -0.404       | 0.4425       |
| CASP4     | -0.299266667 | -0.1526      | -0.359366667 | 0.5318       |
| TMEM14D   | -0.590866667 | -0.514133333 | -0.4448      | 0.1809       |
| LOC644860 | -0.373966667 | -0.2927      | -0.6402      | 0.189633333  |
| TSTD1     | -0.799633333 | -0.8487      | -0.568866667 | 0.050433333  |
| SKP1      | -0.3243      | -0.459966667 | -0.5163      | 0.4048       |
| CNN2      | 0.0187       | -0.6415      | -1.019933333 | 0.229866667  |
| LOC728934 | 0.065933333  | -0.0633      | -0.190766667 | 0.886966667  |
| KIF7      | -0.330133333 | -0.254066667 | -0.059566667 | 0.242433333  |
| PBX3      | 0.128433333  | -0.383433333 | -0.4412      | 0.638833333  |

|              |              |              |              |              |
|--------------|--------------|--------------|--------------|--------------|
| SLC22A15     | -0.365433333 | -0.502166667 | -0.667633333 | 0.3045       |
| MCL1         | 0.014533333  | -0.0173      | 0.0248       | 0.8313       |
| UCHL1        | -0.4624      | -0.287533333 | -0.6343      | 0.4097       |
| SMAD5        | -0.555666667 | -0.7764      | -0.608166667 | 0.121633333  |
| LOC100130154 | -0.274266667 | -0.3067      | -0.5694      | 0.317033333  |
| RASSF1       | -0.036433333 | -0.480433333 | -0.959833333 | 0.329233333  |
| PTGER4       | -0.2794      | -0.452533333 | -0.496166667 | 0.586966667  |
| C14orf45     | -0.729833333 | -0.602766667 | -0.8806      | 0.077266667  |
| HEG1         | -0.152433333 | -0.226366667 | -0.623766667 | 0.356366667  |
| DSCR8        | -0.672766667 | -0.626233333 | -0.630866667 | 0.132733333  |
| SNORA12      | -0.703133333 | -0.5884      | -0.719333333 | -0.026333333 |
| DEDD2        | -0.4557      | -0.777266667 | -0.869433333 | 0.0631       |
| SLC6A15      | -0.737566667 | -1.107666667 | -0.627466667 | 0.181533333  |
| TMEM156      | -0.436366667 | -0.1026      | -0.3209      | 0.320766667  |
| NQO1         | -0.293133333 | -0.0405      | -0.410533333 | 0.6371       |
| BAG3         | -0.1271      | -0.211966667 | -0.5873      | 0.479466667  |
| C9orf95      | -0.6972      | -0.482166667 | -0.5035      | 0.1596       |
| SPATA2       | -0.615633333 | -0.4995      | -0.471633333 | 0.391133333  |
| ATG12        | -0.3382      | -0.3946      | -0.430233333 | 0.3937       |
| EDG1         | -0.0352      | -0.533133333 | -0.236533333 | 0.498166667  |
| EPHB2        | -0.1965      | -0.219166667 | -0.4007      | 0.5341       |
| TMEM14C      | -0.5827      | -0.609       | -0.577       | 0.1409       |
| IFI27L2      | -1.074466667 | -0.676233333 | -0.485833333 | -0.127133333 |
| KIAA1949     | -0.008       | -0.228066667 | -0.399133333 | 0.545933333  |
| SOCS2        | -0.300133333 | -0.577833333 | -0.529233333 | 0.3973       |
| LOC728855    | -0.205166667 | -0.392966667 | -0.447       | 0.555633333  |
| RAB22A       | -0.636366667 | -0.864266667 | -0.5806      | -0.001233333 |
| KCTD12       | -0.382466667 | -0.127033333 | -0.278566667 | 0.413966667  |
| MYLK         | -0.492633333 | -0.755133333 | -1.118566667 | -0.074933333 |
| TSPAN9       | -0.687666667 | -0.673666667 | -0.2973      | 0.213833333  |
| SLC14A1      | -0.3571      | -0.336033333 | -0.3492      | 0.4797       |
| FAM171A1     | -0.372533333 | -0.535766667 | -0.302466667 | 0.2712       |
| TRIM52       | -0.556566667 | -0.292633333 | -0.408333333 | 0.2461       |
| EID3         | -0.332266667 | -0.325466667 | -0.310433333 | 0.5345       |
| LOC641825    | -0.474366667 | -0.429333333 | -0.228466667 | 0.43         |
| CMTM3        | -0.149333333 | -0.321733333 | -0.495633333 | 0.527333333  |
| LOC143666    | -0.2371      | -0.328666667 | -0.474466667 | 0.477        |
| ENC1         | 0.9103       | 0.580233333  | -0.3116      | 1.356966667  |
| NR2F2        | -0.348433333 | -0.314933333 | -0.442133333 | 0.366033333  |
| ANXA11       | -0.314033333 | -0.336966667 | -0.175966667 | 0.3444       |
| ING2         | 0.056233333  | -0.214766667 | -0.412033333 | 0.613666667  |
| LOC387867    | -0.462133333 | -0.5156      | -0.6164      | 0.223233333  |
| MZF1         | -0.707633333 | -0.930933333 | -0.587433333 | -0.029033333 |
| FAM24B       | -0.053933333 | -0.2723      | -0.163866667 | 0.639566667  |
| BCAR1        | -0.202266667 | -0.4436      | -0.477       | 0.405433333  |
| PELO         | -0.1924      | -0.207833333 | -0.334       | 0.3794       |
| LOC728069    | -0.586633333 | -0.456833333 | -0.4261      | 0.278866667  |



|           |              |              |              |              |
|-----------|--------------|--------------|--------------|--------------|
| SLC35C1   | -0.448166667 | -0.620233333 | -0.694533333 | 0.2281       |
| FAM105A   | -0.363166667 | -0.481733333 | -0.099333333 | 0.365233333  |
| FTHL11    | -0.930866667 | -0.7263      | -0.814433333 | -0.044       |
| APBB1IP   | -0.1608      | -0.151433333 | -0.1725      | 0.638166667  |
| ZNFX1     | -0.407733333 | -0.455333333 | -0.373133333 | 0.298866667  |
| NUDT1     | 0.118766667  | -0.3239      | -0.083133333 | 0.5588       |
| ME1       | -0.499433333 | -0.4051      | -0.892433333 | 0.1561       |
| DNTTIP1   | -0.2499      | -0.133066667 | -0.527966667 | 0.372333333  |
| IFRD1     | -0.405666667 | -0.848166667 | -0.833233333 | 0.148666667  |
| RSU1      | -0.328666667 | -0.2372      | -0.581833333 | 0.410066667  |
| SYNJ2     | -0.413666667 | -0.370733333 | -0.410833333 | 0.286366667  |
| E2F5      | -0.3717      | -0.175466667 | -0.4803      | 0.327933333  |
| ARMCX3    | -0.661166667 | -0.7838      | -0.728233333 | -0.055033333 |
| AVEN      | -0.5445      | -0.627666667 | -0.563366667 | 0.163566667  |
| TSGA14    | -0.187666667 | -0.2191      | -0.1998      | 0.490233333  |
| PPP1R15A  | -0.054066667 | -0.293733333 | -0.415433333 | 0.656966667  |
| LOC645553 | -0.728933333 | -0.6725      | -0.397866667 | 0.074866667  |
| SNHG8     | -0.793866667 | -0.718633333 | -0.6949      | -0.027733333 |
| RHBDD2    | -0.530966667 | -0.704766667 | -0.592633333 | 0.144        |
| HYI       | -0.1167      | -0.1113      | -0.132633333 | 0.528866667  |
| ZBTB4     | -0.747433333 | -0.660233333 | -0.7158      | 0.013966667  |
| MLKL      | -0.1651      | 0.1011       | -0.002433333 | 0.6795       |
| JUB       | -0.3872      | -0.492633333 | -0.4481      | 0.446666667  |
| ARIH2     | -0.609266667 | -0.609233333 | -0.4392      | 0.1427       |
| LOC554203 | -0.475666667 | -0.4778      | -0.396533333 | 0.3036       |
| CREG1     | -0.665233333 | -0.7497      | -0.477766667 | 0.221833333  |
| PCGF2     | -0.371133333 | -0.637       | -0.604133333 | 0.2167       |
| MEIS3P1   | -0.511933333 | -0.4922      | -0.5302      | 0.306433333  |
| LOC387841 | -0.090566667 | -0.052166667 | 0.0047       | 0.662966667  |
| C7orf40   | -0.270966667 | -0.243866667 | -0.172833333 | 0.523033333  |
| RGL1      | -0.731633333 | -0.689933333 | -0.525133333 | 0.051266667  |
| HSPA5     | -0.345433333 | -0.379633333 | -0.440166667 | 0.3057       |
| C14orf132 | -0.768       | -0.7598      | -0.6701      | -0.0003      |
| NT5C2     | -0.452433333 | -0.355733333 | -0.6532      | 0.2835       |
| PPM1M     | -0.677566667 | -0.6563      | -0.7344      | 0.035533333  |
| PSMD2     | -0.139066667 | -0.071633333 | 0.012466667  | 0.669733333  |
| BTBD11    | -0.1063      | -0.112066667 | -0.1352      | 0.491        |
| SH2D5     | -0.012166667 | -0.191166667 | -0.3327      | 0.676633333  |
| DBNDD2    | -0.281533333 | -0.509866667 | -0.678766667 | 0.312933333  |
| SBDSP     | -0.0731      | -0.120966667 | -0.4062      | 0.456066667  |
| GARNL4    | -0.087233333 | -0.054733333 | -0.1113      | 0.486933333  |
| LOC728006 | -0.372433333 | -0.4905      | -0.543433333 | 0.3395       |
| SLC9A7    | -0.2923      | -0.215466667 | -0.192533333 | 0.506066667  |
| RHOBTB3   | -0.558666667 | -0.489933333 | -0.623066667 | -0.102166667 |
| TAF7      | -0.231       | -0.254033333 | -0.432       | 0.449333333  |
| MRPL52    | -0.2574      | -0.144466667 | -0.4245      | 0.492833333  |
| ORAOV1    | -0.119766667 | -0.3949      | -0.408333333 | 0.561366667  |

|               |              |              |              |              |
|---------------|--------------|--------------|--------------|--------------|
| AFAP1         | -0.1331      | -0.221333333 | -0.376733333 | 0.4013       |
| SHISA5        | -0.540666667 | -0.420933333 | -0.518733333 | 0.275633333  |
| NHS           | -0.3249      | -0.303866667 | -0.414733333 | 0.344833333  |
| PLXNA1        | -0.135166667 | -0.2857      | -0.341466667 | 0.510433333  |
| COL17A1       | -0.077766667 | -0.0481      | 0.005433333  | 0.594066667  |
| CAV2          | -0.2303      | -0.573266667 | -0.5294      | 0.290866667  |
| CUTA          | -0.619966667 | -0.5948      | -0.482166667 | -0.0127      |
| NMNAT2        | -0.0597      | -0.163533333 | -0.077933333 | 0.596433333  |
| PRDM8         | -0.177433333 | -0.334433333 | -0.094433333 | 0.396233333  |
| MAGEA4        | -0.536533333 | -0.289833333 | -0.3139      | 0.1335       |
| SLMAP         | -0.4384      | -0.404333333 | -0.378466667 | 0.2265       |
| LOC647673     | -0.5931      | -0.5547      | -0.572766667 | 0.085466667  |
| RP11-529I10.4 | -0.4279      | -0.463666667 | -0.570566667 | 0.236333333  |
| BIN1          | -0.209066667 | -0.326533333 | -0.305033333 | 0.5799       |
| ISL1          | -0.275566667 | -0.470333333 | -0.491833333 | 0.353133333  |
| LOC100131139  | -0.706733333 | -0.616333333 | -0.707733333 | 0.023533333  |
| AP1S1         | -0.1263      | -0.220666667 | -0.2435      | 0.412066667  |
| MYH9          | -0.188966667 | -0.461133333 | -0.933933333 | 0.2814       |
| SOD2          | -0.365966667 | -0.480966667 | -0.282933333 | 0.368366667  |
| LRRC49        | -0.515633333 | -0.421166667 | -0.4836      | 0.093333333  |
| CAV1          | -0.008666667 | -0.242466667 | -0.8163      | 0.3508       |
| HLA-H         | -0.5429      | -0.854633333 | -0.606133333 | 0.069066667  |
| FAM176B       | -0.699533333 | -0.663833333 | -0.718833333 | 0.1535       |
| PLAGL1        | -0.260966667 | -0.2263      | -0.219966667 | 0.437566667  |
| SLC44A2       | -0.804333333 | -0.644266667 | -0.6538      | -0.143       |
| PDE5A         | -0.6276      | -0.6376      | -0.587233333 | 0.0241       |
| TTC19         | -0.2505      | -0.199233333 | -0.272766667 | 0.747633333  |
| FTHL16        | -0.732033333 | -0.530433333 | -0.7074      | -0.094333333 |
| VAMP4         | -0.094566667 | -0.297933333 | -0.2956      | 0.486233333  |
| AZI2          | -0.668933333 | -0.7187      | -0.6008      | -0.033533333 |
| NIPAL1        | -0.0105      | -0.028966667 | -0.0628      | 0.707233333  |
| GPR1          | -0.838533333 | -0.454233333 | -0.252433333 | 0.2404       |
| KCNG1         | -0.649333333 | -0.507633333 | -0.713333333 | 0.118066667  |
| C6orf48       | -0.606433333 | -0.695766667 | -0.7575      | -0.063133333 |
| TAF13         | -0.051766667 | -0.066366667 | -0.326233333 | 0.4943       |
| TFE3          | -0.327533333 | -0.253766667 | -0.5804      | 0.289433333  |
| RPL7L1        | -0.446633333 | -0.329366667 | -0.212466667 | 0.2703       |
| TSPAN4        | -0.523766667 | -0.5019      | -0.271033333 | 0.2334       |
| NBPF8         | -0.287766667 | -0.0897      | 0.0545       | 0.2121       |
| LOC730302     | -0.338833333 | -0.490566667 | -0.684       | 0.3029       |
| RPL13L        | -0.515933333 | -0.4606      | -0.413666667 | 0.213866667  |
| PPIA          | -0.283833333 | -0.4263      | -0.260166667 | 0.3747       |
| CTSL1         | -0.3329      | -0.5638      | -0.300266667 | 0.396733333  |
| LOC400879     | -0.520266667 | -0.477266667 | -0.405766667 | 0.208333333  |
| MCTP1         | -0.0804      | -0.132666667 | -0.2443      | 0.492866667  |
| GPSM3         | -0.594033333 | -0.521333333 | -0.430466667 | 0.112533333  |
| CASC4         | -0.370033333 | -0.431733333 | -0.422633333 | 0.316566667  |

|           |              |              |              |              |
|-----------|--------------|--------------|--------------|--------------|
| USP47     | -0.528166667 | -0.518933333 | -0.591533333 | 0.102466667  |
| KIAA0564  | -0.675333333 | -0.5604      | -0.4796      | 0.0949       |
| GLIPR2    | -0.695733333 | -0.6079      | -0.480133333 | 0.1771       |
| RPS4Y2    | -0.5266      | -0.5803      | -0.517833333 | 0.0035       |
| CYB5R4    | -0.347166667 | -0.446       | -0.399466667 | 0.359966667  |
| SLC1A3    | -0.327433333 | -0.291266667 | -0.278833333 | 0.5111       |
| ZNF281    | -0.711366667 | -0.475133333 | -0.510866667 | 0.1265       |
| LOC646214 | -0.114266667 | 0.0944       | -0.296833333 | 0.356733333  |
| NSFL1C    | -0.2192      | -0.561633333 | -0.7305      | 0.225766667  |
| OPN3      | -0.599066667 | -0.580733333 | -0.440766667 | 0.056733333  |
| HSPA1A    | -0.327033333 | -0.055866667 | -0.6841      | 0.1054       |
| IRF2BP2   | -0.5787      | -0.614733333 | -0.7629      | -0.051833333 |
| PLAG1     | -0.491466667 | -0.528633333 | -0.545633333 | 0.1089       |
| PDLIM7    | -0.116933333 | -0.169066667 | 0.145866667  | 0.607033333  |
| AGRN      | -0.411333333 | -0.4002      | -0.600833333 | 0.2042       |
| RASSF7    | 0.109833333  | -0.304466667 | -0.677633333 | 0.4856       |
| TIGA1     | -0.591466667 | -0.875566667 | -0.5767      | 0.1388       |
| NR1D2     | -0.648833333 | -0.9012      | -0.873033333 | -0.190033333 |
| LOC92659  | -0.248433333 | -0.2067      | -0.474666667 | 0.339166667  |
| API5      | -0.214066667 | -0.3759      | -0.3512      | 0.254966667  |
| NINJ1     | -0.590733333 | -0.4453      | -0.2396      | 0.351766667  |
| YIPF3     | -0.810866667 | -0.6476      | -0.669633333 | -0.051766667 |
| TRAM2     | 0.036566667  | -0.180233333 | -0.719966667 | 0.416266667  |
| LDOC1     | -0.723866667 | -0.505633333 | -0.612866667 | -0.0403      |
| ISCU      | -0.6061      | -0.7131      | -0.6748      | 0.0591       |
| LOC653308 | -0.2724      | -0.2327      | -0.376966667 | 0.421733333  |
| TXK       | -0.087633333 | -0.110433333 | -0.1802      | 0.565066667  |
| TARS      | -0.509866667 | -0.403766667 | -0.549733333 | 0.1931       |
| GNAI2     | -0.283633333 | -0.3237      | -0.487866667 | 0.3924       |
| BNIP3     | 0.085033333  | -0.152866667 | -0.585933333 | 0.1851       |
| PSMA1     | -0.034033333 | -0.2266      | -0.116       | 0.523966667  |
| ACYP2     | -0.645166667 | -0.791033333 | -0.686166667 | -0.077       |
| CYLD      | -0.3679      | -0.200533333 | -0.254366667 | 0.156366667  |
| SUB1      | -0.4586      | -0.608933333 | -0.373266667 | 0.0906       |
| AAGAB     | -0.2369      | -0.242666667 | -0.257533333 | 0.389        |
| VGFB      | 0.0987       | -0.167733333 | -0.318366667 | 0.5789       |
| EHD1      | 0.255133333  | -0.106433333 | -0.232433333 | 0.775633333  |
| PITX1     | -0.321633333 | -0.353033333 | -0.285033333 | 0.4893       |
| POLD4     | -0.4277      | -0.5478      | -0.5373      | 0.145666667  |
| TMEM45A   | -0.032933333 | -0.3708      | -0.8316      | 0.2611       |
| UAP1      | 0.333566667  | 0.263133333  | -0.1511      | 0.7055       |
| PKP2      | -0.304433333 | -0.268166667 | -0.210666667 | 0.3042       |
| NBEA      | -0.603333333 | -0.701233333 | -0.593766667 | -0.0173      |
| P2RX6     | -0.981033333 | -0.6656      | -0.4848      | -0.2215      |
| BRSK1     | -0.322266667 | -0.364566667 | -0.295866667 | 0.361733333  |
| ANKMY2    | -0.3858      | -0.433766667 | -0.522533333 | 0.204833333  |
| ANXA3     | -0.274133333 | -0.184433333 | -0.140033333 | 0.472466667  |

|              |              |              |              |              |
|--------------|--------------|--------------|--------------|--------------|
| LOC100129673 | -0.4029      | -0.2308      | -0.2741      | 0.295833333  |
| LOC100131294 | -0.430833333 | -0.374866667 | -0.3657      | 0.2556       |
| GCLM         | -0.029833333 | -0.301866667 | -0.759066667 | 0.5788       |
| EIF6         | -0.0823      | -0.1862      | -0.488633333 | 0.565633333  |
| NCRNA00219   | -0.6241      | -0.793433333 | -0.7207      | 0.085966667  |
| HSPA1B       | -0.189466667 | -0.046933333 | -0.5161      | 0.299433333  |
| CDC42EP4     | -0.705566667 | -0.8774      | -0.751266667 | -0.193533333 |
| PRKCA        | -0.483266667 | -0.367433333 | -0.598133333 | 0.094366667  |
| KIAA1539     | -0.0489      | -0.279666667 | -0.4292      | 0.512833333  |
| G6PD         | -0.460333333 | -0.423133333 | -0.4395      | 0.3585       |
| TRIM32       | -0.0537      | -0.1803      | -0.1827      | 0.612433333  |
| COPZ1        | -0.2437      | -0.2701      | -0.497433333 | 0.361066667  |
| RNF216       | -0.396433333 | -0.3588      | -0.494666667 | 0.346366667  |
| NCRNA00152   | -0.1692      | -0.0522      | -0.250166667 | 0.371366667  |
| PHKB         | -0.6533      | -0.559366667 | -0.509466667 | -0.0357      |
| RRAGB        | -0.6935      | -0.662666667 | -0.666433333 | -0.034433333 |
| PGS1         | -0.414133333 | -0.124366667 | -0.264033333 | 0.264033333  |
| FLJ39632     | -0.6973      | -0.425366667 | -0.447033333 | 0.1512       |
| PARP12       | -0.349866667 | -0.336433333 | -0.3757      | 0.382933333  |
| C12orf24     | -0.0424      | 0.043766667  | -0.292833333 | 0.523866667  |
| TRPC1        | -0.5009      | -0.482733333 | -0.498333333 | 0.147033333  |
| ERN1         | -0.331233333 | -0.417866667 | -0.431033333 | 0.390466667  |
| TRNP1        | -0.049166667 | -0.066333333 | -0.320166667 | 0.480533333  |
| HIST1H2BG    | -0.166433333 | 0.028933333  | -0.125566667 | 0.696633333  |
| VDR          | 0.001766667  | -0.0779      | -0.2082      | 0.7473       |
| MVP          | -0.364666667 | -0.3346      | -0.423766667 | 0.324133333  |
| C15orf57     | -0.327833333 | -0.529433333 | -0.487166667 | 0.2874       |
| HIST2H2BE    | -0.397433333 | -0.423933333 | -0.361466667 | 0.385333333  |
| GPX8         | -0.627633333 | -0.497133333 | -0.917666667 | -0.189333333 |
| DNAJB6       | 0.058033333  | -0.149066667 | -0.285233333 | 0.4504       |
| PRDM4        | -0.160233333 | -0.3056      | -0.3661      | 0.4602       |
| C9orf85      | -0.6355      | -0.583833333 | -0.561966667 | 0.0034       |
| TMSL3        | -0.130266667 | -0.287433333 | -0.518333333 | 0.3107       |
| NRK          | -0.276566667 | -0.213733333 | -0.0557      | 0.3863       |
| CHMP1A       | -0.168233333 | -0.061633333 | -0.268566667 | 0.515766667  |
| MAP9         | -0.243       | -0.228       | -0.277533333 | 0.378133333  |
| LOC728431    | -0.346166667 | -0.605       | -0.8603      | 0.218933333  |
| MOBK12C      | -0.146       | -0.4176      | -0.467033333 | 0.4539       |
| SH3RF3       | -0.245566667 | -0.247766667 | -0.2252      | 0.322666667  |
| LOC388344    | -0.772966667 | -0.136566667 | -0.527166667 | 0.131666667  |
| TXN          | -0.245633333 | -0.3638      | -0.429066667 | 0.3349       |
| TAX1BP3      | 0.0067       | -0.2163      | -0.477233333 | 0.417533333  |
| CETN2        | -0.3424      | -0.483366667 | -0.5923      | 0.1696       |
| SLC30A7      | -0.089433333 | -0.265066667 | -0.287733333 | 0.546066667  |
| FAM133B      | -0.191966667 | -0.127433333 | -0.1835      | 0.497466667  |
| SBDS         | -0.092633333 | -0.1348      | -0.468066667 | 0.4388       |
| PTRF         | -0.0299      | -0.220466667 | -0.659233333 | 0.3892       |

|              |              |              |              |              |
|--------------|--------------|--------------|--------------|--------------|
| C9orf30      | -0.099166667 | -0.0633      | -0.146766667 | 0.483966667  |
| ARPC5L       | 0.007233333  | 0.069233333  | -0.064266667 | 0.683833333  |
| GNPDA2       | -0.123166667 | -0.385966667 | -0.423566667 | 0.48         |
| C16orf48     | -0.315566667 | -0.159566667 | -0.412533333 | 0.301233333  |
| LOC642477    | -0.525133333 | -0.443033333 | -0.423633333 | 0.170133333  |
| GOLGA3       | -0.342466667 | -0.5237      | -0.712733333 | 0.033933333  |
| AGBL5        | -0.846       | -0.625166667 | -0.563566667 | -0.1296      |
| FBXL18       | -0.401833333 | -0.472333333 | -0.547766667 | 0.123266667  |
| HOXA5        | -0.269866667 | -0.538766667 | -0.5556      | 0.112466667  |
| ZNF23        | -0.4436      | -0.4106      | -0.603566667 | 0.1392       |
| ECOP         | -0.027733333 | -0.1543      | -0.350366667 | 0.442866667  |
| C6orf160     | -0.575266667 | -0.503733333 | -0.5563      | 0.175833333  |
| LOC390530    | -0.5106      | -0.6472      | -0.541533333 | 0.102666667  |
| BRI3P1       | -0.7194      | -0.447566667 | -0.348866667 | 0.116033333  |
| ITFG1        | -0.731866667 | -0.577566667 | -0.615       | -0.0861      |
| LOC100132444 | -0.1082      | -0.137033333 | -0.133066667 | 0.4557       |
| DPH3         | -0.167466667 | -0.120633333 | -0.2536      | 0.4964       |
| FTHL12       | -0.574933333 | -0.4527      | -0.6405      | 0.136566667  |
| ZFP36        | -0.042766667 | -0.490633333 | -0.2643      | 0.553866667  |
| LOC344887    | -0.3377      | -0.374333333 | -0.477866667 | 0.294533333  |
| REEP5        | -0.625233333 | -0.629233333 | -0.578133333 | 0.0178       |
| LOC647856    | -0.4394      | -0.3798      | -0.4207      | 0.193366667  |
| MTCH1        | -0.3421      | -0.221333333 | -0.214266667 | 0.408133333  |
| C7orf63      | -0.349866667 | -0.349366667 | -0.482133333 | 0.195866667  |
| C3orf38      | -0.141066667 | -0.2177      | -0.204433333 | 0.450533333  |
| NBPF20       | -0.357866667 | -0.229666667 | 0.079866667  | 0.169666667  |
| LOC645236    | -0.1432      | -0.010333333 | 0.008633333  | 0.481166667  |
| GRN          | -0.622333333 | -0.8475      | -0.666833333 | -0.1291      |
| SNHG5        | -0.529833333 | -0.6822      | -0.599933333 | -0.036033333 |
| MEF2D        | -0.463966667 | -0.637833333 | -0.436766667 | 0.091233333  |
| LOC346950    | -0.544633333 | -0.498733333 | -0.571633333 | 0.084566667  |
| ZCCHC6       | -0.312666667 | -0.236033333 | -0.347233333 | 0.1963       |
| ANXA2P3      | -0.166533333 | -0.213666667 | -0.7122      | 0.279566667  |
| PTHLH        | -0.1578      | -0.257566667 | -0.2063      | 0.589133333  |
| TRIM5        | -0.362666667 | -0.272766667 | -0.2279      | 0.2906       |
| STARD13      | 0.114566667  | -0.099833333 | -0.357066667 | 0.6343       |
| TRIM56       | -0.2467      | -0.297966667 | -0.259033333 | 0.250566667  |
| LOC648982    | -0.212033333 | -0.180633333 | -0.247066667 | 0.415466667  |
| UBE2D2       | -0.094433333 | -0.1229      | -0.127133333 | 0.525833333  |
| RCN3         | -0.463766667 | -0.5463      | -0.7539      | 0.137433333  |
| CHMP4B       | -0.2966      | -0.5016      | -0.267066667 | 0.326866667  |
| PVRL2        | -0.232933333 | -0.458733333 | -0.577066667 | 0.204766667  |
| DLG4         | -0.134666667 | -0.152233333 | -0.194366667 | 0.389433333  |
| ANKLE2       | -0.202833333 | -0.4564      | -0.486733333 | 0.274966667  |
| EDF1         | -0.375133333 | -0.456333333 | -0.373666667 | 0.214166667  |
| TLR4         | 0.002333333  | -0.003733333 | -0.351133333 | 0.517733333  |
| ZAK          | -0.275133333 | -0.426666667 | -0.202466667 | 0.345533333  |

|              |              |              |              |              |
|--------------|--------------|--------------|--------------|--------------|
| BTBD10       | -0.141433333 | -0.1686      | -0.170866667 | 0.5363       |
| PSMB9        | -0.5141      | -0.4856      | -0.332166667 | 0.152433333  |
| TPST2        | -0.3627      | -0.460733333 | -0.584266667 | 0.230766667  |
| RAC1         | -0.0623      | -0.210233333 | -0.1701      | 0.441933333  |
| AIM2         | -0.474366667 | -0.0278      | -0.054266667 | 0.361566667  |
| DUSP5        | 0.204933333  | 0.142633333  | -0.080466667 | 0.958833333  |
| SLC38A1      | -0.331133333 | -0.457533333 | -0.6682      | 0.127933333  |
| LOC652595    | 0.054066667  | 0.110833333  | -0.097233333 | 0.621533333  |
| CMTM6        | -0.3234      | -0.255833333 | -0.137033333 | 0.255266667  |
| SERPINB6     | -0.809433333 | -0.606166667 | -0.378066667 | -0.118633333 |
| LOC440160    | -0.5941      | -0.459833333 | -0.497633333 | 0.040566667  |
| CAPN2        | 0.091566667  | -0.158233333 | -0.370666667 | 0.550633333  |
| UGT2B7       | -0.879       | -0.803633333 | -0.7859      | -0.030266667 |
| DPYSL2       | -0.0993      | -0.339566667 | -1.133166667 | 0.104733333  |
| M6PRBP1      | 0.078966667  | -0.0813      | -0.407733333 | 0.4422       |
| LOC440157    | -0.530733333 | -0.3637      | -0.400866667 | 0.1177       |
| LOC391019    | -0.553166667 | -0.440066667 | -0.410933333 | 0.020133333  |
| LOC285741    | -0.584933333 | -0.4271      | -0.394133333 | 0.098633333  |
| MTMR11       | -0.5692      | -0.607633333 | -0.5646      | -0.044266667 |
| TRIM25       | -0.452433333 | -0.413166667 | -0.3836      | 0.219833333  |
| NCRNA00094   | -0.2978      | -0.416333333 | -0.4812      | 0.212733333  |
| STAT4        | -0.370166667 | -0.371833333 | -0.236933333 | 0.3219       |
| SLC24A6      | -0.509633333 | -0.5135      | -0.531833333 | 0.177466667  |
| LOC643507    | -0.262333333 | -0.116633333 | -0.2308      | 0.467733333  |
| BAG2         | -0.219733333 | -0.099566667 | -0.364066667 | 0.4025       |
| LOC100133999 | -0.613733333 | -0.4762      | -0.601166667 | 0.078766667  |
| TNFAIP1      | -0.108266667 | -0.373666667 | -0.5303      | 0.358233333  |
| MAP2K1       | 0.143133333  | -0.0789      | -0.155566667 | 0.525366667  |
| WDR6         | -0.259033333 | -0.543233333 | -0.388566667 | 0.298233333  |
| BCL7B        | -0.059833333 | -0.0793      | -0.1919      | 0.5188       |
| NUB1         | -0.427333333 | -0.509166667 | -0.511933333 | 0.063766667  |
| MANEA        | -0.1359      | -0.161566667 | -0.336466667 | 0.239833333  |
| CAMK2N1      | -0.307733333 | -0.353433333 | -0.756266667 | 0.203466667  |
| SRP14        | -0.502866667 | -0.603366667 | -0.548433333 | 0.091233333  |
| WFDC3        | -0.136833333 | -0.117733333 | -0.109966667 | 0.4653       |
| TUBGCP2      | -0.2716      | -0.266866667 | -0.289833333 | 0.399666667  |
| POLR2L       | -0.0782      | -0.064266667 | -0.0785      | 0.514266667  |
| PSMB10       | -0.3763      | -0.332966667 | -0.2402      | 0.372766667  |
| C11orf58     | -0.333666667 | -0.6295      | -0.499133333 | 0.194733333  |
| CRBN         | -0.592866667 | -0.856233333 | -0.6012      | 0.017766667  |
| TSPAN17      | -0.460666667 | -0.463333333 | -0.382066667 | 0.186366667  |
| CDS1         | -0.280433333 | -0.302766667 | -0.310366667 | 0.312966667  |
| KIAA1191     | -0.372233333 | -0.503966667 | -0.312833333 | 0.2338       |
| CDC26        | -0.441533333 | -0.162566667 | -0.317266667 | 0.330366667  |
| IL20RB       | -0.281966667 | -0.260266667 | -0.4283      | 0.1652       |
| ODF2         | -0.1732      | -0.2872      | -0.4282      | 0.219566667  |
| SEZ6L2       | -0.6076      | -0.613933333 | -0.575733333 | -0.047966667 |

|           |              |              |              |              |
|-----------|--------------|--------------|--------------|--------------|
| UQCRC1    | -0.175       | -0.258833333 | -0.348933333 | 0.409966667  |
| CIDCEP    | -0.3692      | -0.088833333 | -0.110433333 | 0.416366667  |
| NAT13     | -0.094933333 | -0.138966667 | -0.345366667 | 0.3002       |
| C3orf10   | -0.525733333 | -0.369566667 | -0.5429      | 0.159733333  |
| PGD       | -0.493       | -0.611766667 | -0.269366667 | 0.2194       |
| TBC1D23   | -0.189133333 | -0.3126      | -0.522066667 | 0.154433333  |
| EIF1B     | -0.298066667 | -0.515533333 | -0.5869      | 0.251666667  |
| LOC644615 | -0.5279      | -0.480166667 | -0.4096      | 0.104033333  |
| PDLIM3    | 0.107333333  | -0.0589      | -0.593433333 | 0.3922       |
| RRP8      | -0.170533333 | -0.145233333 | -0.2076      | 0.425866667  |
| UIMC1     | -0.209       | -0.344066667 | -0.4588      | 0.211266667  |
| LOC728820 | -0.402833333 | -0.503766667 | -0.293633333 | 0.187        |
| SLC16A4   | -0.672666667 | -0.4135      | -0.250333333 | -0.0211      |
| TTC17     | -0.338866667 | -0.3176      | -0.437133333 | 0.1204       |
| LOC728408 | -0.019833333 | -0.139233333 | -0.120266667 | 0.462533333  |
| RNF135    | -0.662666667 | -0.673233333 | -0.399133333 | 0.0843       |
| GLT8D1    | -0.479033333 | -0.429566667 | -0.596066667 | -0.071933333 |
| PGBD3     | 0.034133333  | -0.0931      | -0.179966667 | 0.6344       |
| NBPF10    | -0.0672      | -0.022566667 | 0.012466667  | 0.597866667  |
| PGAM1     | 0.077066667  | -0.111366667 | -0.0525      | 0.460833333  |
| NOVA1     | -0.1754      | -0.217966667 | -0.221966667 | 0.310966667  |
| RPS24     | 0.028166667  | -0.082033333 | -0.0963      | 0.561333333  |
| ULK1      | -0.537233333 | -0.7662      | -0.6635      | -0.102633333 |
| EPHA4     | -0.078533333 | -0.266666667 | -0.2422      | 0.4004       |
| VEZT      | -0.461566667 | -0.2976      | -0.2885      | 0.128433333  |
| RPL14     | -0.5397      | -0.384266667 | -0.3385      | 0.0938       |
| C3orf59   | 0.316033333  | 0.052533333  | -0.1489      | 0.727766667  |
| PITPNM1   | -0.356833333 | -0.357066667 | -0.3481      | 0.0795       |
| LOC441242 | -0.293933333 | -0.4119      | -0.4923      | 0.2743       |
| NR3C1     | -0.284533333 | -0.449166667 | -0.462433333 | 0.129433333  |
| TMEM171   | -0.109333333 | -0.064266667 | -0.117033333 | 0.557933333  |
| TUSC2     | -0.130333333 | -0.294566667 | -0.269533333 | 0.412566667  |
| ITGB4BP   | -0.0672      | -0.2348      | -0.5957      | 0.345866667  |
| LOC647000 | -0.034666667 | -0.026433333 | -0.083133333 | 0.5194       |
| DUS4L     | -0.3475      | -0.377533333 | -0.2386      | 0.283533333  |
| DIABLO    | -0.518366667 | -0.533966667 | -0.505366667 | 0.027966667  |
| MAGEA10   | -0.2354      | -0.119833333 | -0.150566667 | 0.297133333  |
| BRI3      | -0.555066667 | -0.4457      | -0.423433333 | 0.207        |
| C11orf17  | -0.487       | -0.1722      | -0.324933333 | 0.2893       |
| GOT1      | -0.395633333 | -0.377633333 | -0.395466667 | 0.265666667  |
| C9orf6    | -0.2862      | -0.297333333 | -0.327833333 | 0.2454       |
| OXSR1     | -0.012       | -0.387633333 | -0.484933333 | 0.432333333  |
| ACADVL    | -0.1911      | -0.179766667 | -0.314966667 | 0.265        |
| USP3      | -0.214333333 | -0.2369      | -0.280033333 | 0.368033333  |
| MBOAT7    | -0.269066667 | -0.301466667 | -0.460633333 | 0.152733333  |
| PTGES2    | -0.360033333 | -0.3438      | -0.246733333 | 0.262833333  |
| LOC728126 | -0.2962      | -0.2681      | -0.4032      | 0.265033333  |

|            |              |              |              |              |
|------------|--------------|--------------|--------------|--------------|
| FURIN      | -0.0847      | -0.1659      | -0.138933333 | 0.4526       |
| LOC389672  | -0.3009      | -0.287566667 | -0.339466667 | 0.250466667  |
| TMEM115    | -0.216233333 | -0.456966667 | -0.514933333 | 0.247133333  |
| CTBP1      | -0.465833333 | -0.367733333 | -0.294866667 | 0.2109       |
| C1orf183   | -0.2792      | -0.2572      | -0.1784      | 0.248033333  |
| CCNDBP1    | -0.5039      | -0.686       | -0.4642      | 0.102133333  |
| LOC644132  | -0.132733333 | -0.335933333 | -0.422       | 0.302366667  |
| C10orf78   | -0.0132      | 0.004466667  | 0.023233333  | 0.4839       |
| C14orf4    | -0.136933333 | -0.154233333 | -0.175966667 | 0.257566667  |
| OTUD1      | -0.591666667 | -0.650266667 | -0.667666667 | -0.026866667 |
| GSTM3      | -0.442       | -0.4131      | -0.483       | 0.086366667  |
| C1orf53    | -0.4546      | -0.565633333 | -0.638933333 | 0.0361       |
| CCRK       | -0.284733333 | -0.379866667 | -0.3195      | 0.282166667  |
| ZNF629     | -0.520033333 | -0.556933333 | -0.588       | -0.063933333 |
| SH3BGRL3   | -0.0728      | -0.0845      | -0.497633333 | 0.439833333  |
| FLJ35409   | 0.367066667  | -0.1072      | -0.411433333 | 0.524633333  |
| BMP1       | -0.4646      | -0.556933333 | -0.615866667 | 0.0583       |
| C17orf97   | -0.452466667 | -0.4667      | -0.451133333 | 0.285466667  |
| DENND5B    | -0.593       | -0.522633333 | -0.6607      | -0.313366667 |
| C3orf58    | -0.1436      | -0.156866667 | -0.304133333 | 0.445333333  |
| ENTPD7     | 0.0072       | -0.105733333 | -0.1499      | 0.386433333  |
| ZBED5      | -0.3101      | -0.303366667 | -0.4041      | 0.317433333  |
| MGEA5      | -0.4402      | -0.4751      | -0.5288      | 0.056        |
| LOC728031  | -0.335533333 | -0.159133333 | -0.284733333 | 0.4205       |
| NIPA2      | -0.2746      | -0.3652      | -0.326333333 | 0.3017       |
| PORCN      | -0.185266667 | -0.2071      | -0.1651      | 0.411433333  |
| PPIF       | -0.1773      | -0.164633333 | -0.0783      | 0.457433333  |
| TNFRSF10B  | -0.1334      | -0.000366667 | -0.087066667 | 0.3866       |
| CLDND2     | -0.371766667 | -0.251433333 | -0.1482      | 0.222933333  |
| FUCA1      | -0.345       | -0.5729      | -0.263733333 | 0.0784       |
| PAWR       | -0.0605      | -0.1629      | -0.4003      | 0.335333333  |
| NCRNA00081 | -0.130766667 | -0.064266667 | -0.326       | 0.2872       |
| TCTEX1D2   | -0.5082      | -0.5148      | -0.7436      | -0.147666667 |
| SNAPC1     | -0.147133333 | -0.102366667 | -0.299233333 | 0.279733333  |
| RPL41      | -0.058666667 | -0.1934      | -0.374966667 | 0.3801       |
| ABHD12     | -0.563433333 | -0.6098      | -0.479966667 | 0.007366667  |
| CCM2       | -0.5839      | -0.237566667 | -0.2961      | 0.133866667  |
| SKP1A      | -0.3978      | -0.382933333 | -0.4471      | 0.018266667  |
| LRRC8A     | -0.354766667 | -0.424233333 | -0.433066667 | 0.189966667  |
| MAP1LC3B   | -0.4554      | -0.460633333 | -0.366733333 | 0.048833333  |
| SERTAD3    | -0.1249      | -0.368166667 | -0.362033333 | 0.372366667  |
| F11R       | -0.254733333 | -0.362733333 | -0.245       | 0.038066667  |
| MGC45800   | -0.224533333 | -0.1445      | -0.0704      | 0.352966667  |
| DLC1       | -0.024333333 | -0.033166667 | -0.038566667 | 0.560966667  |
| LOC729255  | -0.162366667 | -0.163       | -0.247033333 | 0.180266667  |
| RELB       | -0.097766667 | -0.326933333 | -0.336433333 | 0.479733333  |
| LOC647349  | -0.194033333 | -0.533033333 | -0.285233333 | 0.1858       |



|              |              |              |              |              |
|--------------|--------------|--------------|--------------|--------------|
| CARS         | -0.605566667 | -0.392166667 | -0.691       | -0.130166667 |
| DNAJC25      | -0.3195      | -0.274566667 | -0.309266667 | 0.2983       |
| IGFBP6       | -0.5291      | -0.512633333 | -0.457666667 | 0.018933333  |
| SAT1         | -0.268966667 | -0.5328      | -0.050833333 | 0.427533333  |
| ZMIZ2        | -0.5274      | -0.398766667 | -0.492       | 0.0579       |
| ARL8B        | -0.415133333 | -0.399233333 | -0.407366667 | 0.170966667  |
| LOC729123    | -0.272233333 | -0.117533333 | -0.267966667 | 0.371166667  |
| WDR70        | -0.3696      | -0.447766667 | -0.4336      | 0.246966667  |
| LOC648249    | -0.472566667 | -0.415933333 | -0.267066667 | 0.267433333  |
| TPM2         | -0.3612      | -0.566566667 | -0.7621      | 0.015433333  |
| VPS24        | -0.340666667 | -0.701266667 | -0.4835      | 0.1138       |
| ZNF35        | -0.060633333 | -0.1494      | -0.1287      | 0.563266667  |
| C10orf35     | -0.1897      | -0.226133333 | -0.220666667 | 0.3753       |
| LOC730052    | -0.307266667 | -0.087233333 | -0.4811      | 0.309533333  |
| MPP6         | -0.022733333 | 0.014733333  | -0.256966667 | 0.450866667  |
| RPL17        | -0.419433333 | -0.568233333 | -0.442333333 | 0.0454       |
| CD1D         | -0.209566667 | -0.139266667 | -0.231566667 | 0.2387       |
| AHI1         | -0.566866667 | -0.3518      | -0.4776      | 0.0036       |
| CTDSP2       | -0.474633333 | -0.7055      | -0.671366667 | -0.1094      |
| ARHGAP23     | -0.344033333 | -0.327866667 | -0.4471      | 0.1591       |
| AHSA2        | -0.5913      | -0.693233333 | -0.318366667 | -0.0912      |
| PMS2L3       | -0.362966667 | -0.239033333 | -0.2697      | 0.191366667  |
| CDK7         | -0.036233333 | -0.1507      | -0.3078      | 0.4884       |
| AGTRAP       | -0.430933333 | -0.241066667 | -0.174133333 | 0.350766667  |
| LOC730382    | -0.195233333 | -0.057233333 | -0.161266667 | 0.324266667  |
| SSBP2        | -0.574366667 | -0.3504      | -0.430566667 | 0.015633333  |
| ANO10        | -0.620033333 | -0.413766667 | -0.344233333 | 0.202433333  |
| RAB5A        | -0.3084      | -0.430033333 | -0.451066667 | 0.140133333  |
| MYPN         | -0.106933333 | -0.025466667 | -0.174966667 | 0.5372       |
| TOMM34       | 0.040533333  | 0.006033333  | -0.160966667 | 0.482433333  |
| LOC100127975 | -0.322866667 | -0.043133333 | -0.1147      | 0.1609       |
| SPATA7       | -0.466866667 | -0.555833333 | -0.742033333 | -0.020833333 |
| SRP14P1      | -0.368733333 | -0.425866667 | -0.4823      | 0.098666667  |
| PTPN12       | 0.216166667  | -0.060966667 | -0.21        | 0.537633333  |
| MRPS10       | -0.295633333 | -0.3044      | -0.307966667 | 0.212033333  |
| IRAK1BP1     | -0.4507      | -0.275033333 | -0.5181      | 0.002533333  |
| ZC4H2        | -0.194533333 | -0.2478      | -0.212033333 | 0.306566667  |
| MITD1        | -0.406933333 | -0.564666667 | -0.4728      | 0.0737       |
| TAF9         | -0.1744      | -0.162633333 | -0.2711      | 0.334233333  |
| DIAPH3       | 0.1141       | 0.056433333  | -0.0795      | 0.5651       |
| LOC645251    | -0.093266667 | -0.2334      | -0.080066667 | 0.3063       |
| CLIP3        | -0.729533333 | -0.647266667 | -0.654033333 | -0.316233333 |
| RPRC1        | 0.053233333  | -0.225433333 | -0.212633333 | 0.468533333  |
| FBXL17       | -0.249333333 | -0.443266667 | -0.3266      | 0.1614       |
| TFG          | -0.099633333 | -0.218866667 | -0.308666667 | 0.2542       |
| ILK          | -0.128533333 | -0.161       | -0.379733333 | 0.3431       |
| ZDHHC2       | -0.254766667 | -0.103433333 | -0.2945      | 0.2296       |

|           |              |              |              |              |
|-----------|--------------|--------------|--------------|--------------|
| DPY19L1   | -0.493966667 | -0.3926      | -0.2259      | 0.106366667  |
| KLC1      | -0.280066667 | -0.3063      | -0.2352      | 0.153766667  |
| CA13      | -0.299666667 | -0.296066667 | -0.172633333 | 0.223033333  |
| C7orf28B  | -0.257466667 | -0.299166667 | -0.349733333 | 0.2761       |
| APPBP2    | -0.686966667 | -0.753233333 | -0.5647      | -0.0238      |
| HGS       | -0.052266667 | -0.191466667 | -0.300266667 | 0.385266667  |
| F2RL1     | 0.179466667  | -0.106133333 | -0.232033333 | 0.618266667  |
| HMGNA4    | -0.348933333 | -0.3045      | -0.202566667 | 0.259333333  |
| SEC16A    | -0.411033333 | -0.399933333 | -0.5028      | 0.076666667  |
| NIPA1     | -0.117633333 | -0.286333333 | -0.112       | 0.272133333  |
| SERTAD1   | 0.0513       | -0.0293      | -0.172366667 | 0.4554       |
| PHACTR2   | -0.1295      | -0.2127      | -0.205066667 | 0.474833333  |
| DCUN1D3   | -0.1139      | -0.193333333 | -0.068733333 | 0.3654       |
| EIF5      | -0.2403      | -0.568       | -0.505       | 0.1277       |
| ZMAT2     | -0.319866667 | -0.4741      | -0.4048      | 0.153        |
| IFI44     | -0.341966667 | -0.062966667 | -0.0796      | 0.403266667  |
| GFM2      | -0.207433333 | -0.164266667 | -0.283566667 | 0.343766667  |
| KIAA1147  | -0.316033333 | -0.195733333 | -0.194033333 | 0.118666667  |
| ZSWIM7    | -0.440333333 | -0.503       | -0.5759      | 0.0799       |
| SIX4      | -0.227266667 | -0.3104      | -0.256533333 | 0.205333333  |
| SURF4     | -0.182666667 | -0.2787      | -0.4667      | 0.219266667  |
| LOC339970 | -0.608       | -0.495233333 | -0.490066667 | -0.008166667 |
| SMPD1     | -0.8067      | -0.687266667 | -0.367633333 | -0.0202      |
| LTBP2     | -0.033733333 | -0.3046      | -0.167       | 0.263133333  |
| RAD23B    | -0.048433333 | -0.455733333 | -0.389033333 | 0.266266667  |
| SCRN1     | -0.1946      | -0.190433333 | -0.314366667 | 0.266866667  |
| FLRT2     | -0.1831      | -0.301166667 | -0.182833333 | 0.279566667  |
| PTPRE     | -0.098566667 | -0.024733333 | 0.0148       | 0.592366667  |
| EEF1A1    | -0.460766667 | -0.394966667 | -0.718033333 | 0.059266667  |
| C7orf58   | -0.303566667 | -0.2026      | -0.324366667 | 0.2088       |
| SEC61G    | -0.133566667 | -0.2521      | -0.642233333 | 0.175733333  |
| SNORD49A  | -0.4146      | -0.193966667 | -0.250266667 | 0.204366667  |
| AMPH      | 0.008966667  | -0.062066667 | -0.147166667 | 0.279033333  |
| NCOA7     | -0.527766667 | -0.294666667 | -0.4753      | 0.098233333  |
| LOC283932 | -0.449466667 | -0.3314      | -0.322166667 | 0.152433333  |
| MAN2A1    | -0.2677      | -0.073866667 | -0.490866667 | 0.0927       |
| CANT1     | -0.158       | -0.090333333 | -0.3273      | 0.239166667  |
| C20orf199 | -0.453766667 | -0.601333333 | -0.418633333 | 0.143033333  |
| RHOG      | -0.1435      | -0.224833333 | -0.359966667 | 0.394533333  |
| FBRS      | -0.1239      | -0.268366667 | -0.4796      | 0.364633333  |
| LOC728620 | -0.156233333 | -0.068133333 | -0.136466667 | 0.4619       |
| GPR176    | -0.090466667 | -0.4201      | -0.392666667 | 0.270966667  |
| LOC650803 | 0.0239       | -0.098833333 | -0.2932      | 0.392666667  |
| FTHL8     | -0.6244      | -0.2194      | -0.422533333 | 0.140366667  |
| RPL15     | -0.507566667 | -0.470266667 | -0.435733333 | -0.015433333 |
| PMAIP1    | -0.053133333 | 0.069266667  | -0.456333333 | 0.291966667  |
| C7orf44   | -0.2449      | -0.245266667 | -0.076166667 | 0.326633333  |

|              |              |              |              |              |
|--------------|--------------|--------------|--------------|--------------|
| WIPI2        | -0.394466667 | -0.455566667 | -0.448333333 | 0.118633333  |
| ARHGEF19     | -0.3364      | -0.292066667 | -0.3883      | 0.151933333  |
| FSTL3        | -0.294666667 | -0.3716      | -0.452033333 | 0.2289       |
| PVR          | -0.039866667 | -0.032366667 | -0.161666667 | 0.462766667  |
| BZW1         | 0.1917       | -0.124233333 | -0.2178      | 0.527866667  |
| LOC729926    | -0.425733333 | -0.4997      | -0.4206      | 0.079033333  |
| PPP1R13L     | 0.018166667  | -0.311633333 | -0.436766667 | 0.3267       |
| E2F4         | -0.1087      | -0.1354      | -0.169066667 | 0.451733333  |
| LOC652491    | -0.331233333 | -0.140366667 | -0.2831      | 0.278333333  |
| PRRT3        | -0.694333333 | -0.6065      | -0.289833333 | -0.2014      |
| ZFYVE20      | -0.481166667 | -0.565133333 | -0.523966667 | -0.022766667 |
| RABGAP1      | -0.4896      | -0.325766667 | -0.434966667 | 0.0277       |
| LOC643870    | -0.4307      | -0.3451      | -0.431133333 | -0.011166667 |
| LOC728791    | -0.567233333 | -0.254833333 | -0.283       | 0.106833333  |
| SRF          | 0.137633333  | -0.5312      | -0.6003      | 0.4034       |
| LOC730744    | -0.233266667 | -0.330466667 | -0.221666667 | 0.211066667  |
| PLSCR3       | -0.545133333 | -0.4684      | -0.508166667 | -0.0161      |
| MGC42105     | -0.387766667 | -0.311266667 | -0.2987      | 0.0351       |
| TUSC4        | -0.4979      | -0.3927      | -0.409566667 | 0.078766667  |
| SH2B3        | -0.092933333 | 0.179966667  | 0.4395       | 0.6813       |
| TIGD2        | -0.4453      | -0.280566667 | -0.270533333 | 0.217233333  |
| FKSG30       | 0.387533333  | -0.122366667 | -0.363366667 | 0.574566667  |
| EVI2B        | -0.154433333 | -0.152533333 | -0.1643      | 0.348        |
| SLC10A3      | -0.098933333 | -0.194633333 | -0.4733      | 0.192966667  |
| TNFAIP8      | -0.1476      | -0.1507      | -0.1516      | 0.3365       |
| LOC100133662 | -0.336033333 | -0.4499      | -0.286966667 | 0.077366667  |
| LOC730256    | -0.4972      | -0.421933333 | -0.3584      | 0.158        |
| SEC24C       | -0.291833333 | -0.2583      | -0.361466667 | 0.161833333  |
| BUB3         | 0.058833333  | -0.1552      | -0.060066667 | 0.5094       |
| BCL9L        | -0.104766667 | -0.2123      | -0.559233333 | 0.242066667  |
| WDR45L       | -0.016833333 | -0.223433333 | -0.183966667 | 0.399166667  |
| PXN          | -0.054733333 | 0.046966667  | 0.018066667  | 0.480466667  |
| DISP1        | -0.446633333 | -0.332833333 | -0.635       | 0.077766667  |
| SCPEP1       | -0.634566667 | -0.7408      | -0.262333333 | -0.0062      |
| LOC728188    | 0.029033333  | -0.2013      | -0.1385      | 0.246333333  |
| TCIRG1       | -0.158933333 | -0.166566667 | -0.4079      | 0.371366667  |
| HTATIP2      | -0.397333333 | -0.240533333 | -0.392966667 | 0.157566667  |
| SPATA5L1     | -0.083233333 | 0.071766667  | -0.134066667 | 0.5419       |
| CLDN12       | -0.021266667 | -0.3076      | -0.054566667 | 0.4585       |
| SLC9A1       | -0.3438      | -0.267266667 | -0.210366667 | 0.289133333  |
| BCL3         | -0.022766667 | -0.304266667 | -0.4417      | 0.311166667  |
| LOC644029    | -0.5343      | -0.459366667 | -0.3511      | 0.0533       |
| KRCC1        | -0.718366667 | -0.4697      | -0.5937      | 0.025733333  |
| TMEM41B      | -0.2669      | -0.216166667 | -0.2654      | 0.298766667  |
| SCARNA13     | -0.329933333 | -0.264833333 | -0.245666667 | 0.221633333  |
| TRERF1       | -0.204433333 | -0.147133333 | -0.3013      | 0.241966667  |
| C12orf29     | -0.1807      | -0.2467      | -0.197033333 | 0.343366667  |

|              |              |              |              |              |
|--------------|--------------|--------------|--------------|--------------|
| LEMD2        | -0.3532      | -0.373666667 | -0.4841      | 0.0907       |
| SCYL1BP1     | -0.249       | -0.315133333 | -0.452233333 | 0.258233333  |
| LTBP3        | -0.221833333 | -0.454433333 | -0.4404      | 0.151066667  |
| RGS2         | 0.051833333  | -0.555766667 | -0.8159      | 0.127733333  |
| RHOA         | -0.2584      | -0.216066667 | -0.345866667 | 0.2856       |
| RWDD2A       | -0.301733333 | -0.461133333 | -0.521166667 | 0.09         |
| RABGEF1      | -0.2159      | -0.2198      | -0.3789      | 0.1921       |
| NDRG1        | -0.2417      | -0.184133333 | -0.212366667 | 0.1837       |
| MSRB3        | -0.112066667 | -0.304633333 | -0.560666667 | 0.271033333  |
| ASPHD1       | -0.479633333 | -0.3237      | -0.437       | 0.122366667  |
| ZNF792       | -0.143266667 | -0.275933333 | -0.097433333 | 0.4671       |
| SFRS17A      | -0.1205      | -0.321933333 | -0.328566667 | 0.313966667  |
| RPL37        | -0.571766667 | -0.438566667 | -0.394166667 | 0.007933333  |
| C7orf28A     | -0.318666667 | -0.176933333 | -0.2731      | 0.182        |
| DUSP6        | 0.4114       | 0.147733333  | 0.3303       | 0.929533333  |
| WDR26        | -0.526066667 | -0.602533333 | -0.273266667 | 0.048266667  |
| TMEM79       | -0.312833333 | -0.369633333 | -0.3605      | 0.268566667  |
| LOC100130506 | -0.154166667 | -0.4409      | -0.4957      | 0.104533333  |
| BEND7        | -0.4108      | -0.2992      | -0.290866667 | 0.2654       |
| FGFRL1       | -0.236233333 | -0.1275      | -0.423766667 | 0.217033333  |
| PTPN1        | -0.069933333 | -0.186166667 | -0.015166667 | 0.442366667  |
| CBX1         | 0.011633333  | -0.1224      | -0.189566667 | 0.359733333  |
| CASP6        | -0.401766667 | -0.118866667 | -0.237066667 | 0.1119       |
| TRIM38       | -0.350133333 | -0.380966667 | -0.3993      | 0.136433333  |
| PHPT1        | -0.364766667 | -0.237866667 | -0.315533333 | 0.119566667  |
| ZFAND3       | -0.3946      | -0.338666667 | -0.263033333 | 0.152666667  |
| CHCHD7       | -0.283866667 | -0.531466667 | -0.4949      | 0.161233333  |
| NDST2        | -0.330566667 | -0.304566667 | -0.2404      | 0.1992       |
| MIR886       | -0.282466667 | -0.196933333 | -0.372       | 0.203833333  |
| FAM114A1     | -0.110233333 | -0.2571      | -0.5553      | 0.166133333  |
| FAM120AOS    | -0.429033333 | -0.469766667 | -0.506433333 | 0.0046       |
| TMX3         | -0.124166667 | -0.252933333 | -0.1578      | 0.414733333  |
| TMEM14B      | -0.271733333 | -0.293566667 | -0.259166667 | 0.312166667  |
| MIER1        | -0.517933333 | -0.507       | -0.472366667 | -0.026666667 |
| OSBPL7       | -0.527866667 | -0.640433333 | -0.520966667 | -0.0583      |
| ZDHHC13      | -0.335533333 | -0.0607      | -0.008633333 | 0.368566667  |
| LOC729217    | -0.273066667 | -0.184733333 | -0.2044      | 0.177066667  |
| NDUFS8       | -0.3415      | -0.204533333 | -0.223033333 | 0.261166667  |
| LOC100130624 | -0.429333333 | -0.122933333 | -0.376466667 | 0.179633333  |
| ZNF264       | -0.2977      | -0.412833333 | -0.3657      | 0.1236       |
| PSMB8        | -0.318866667 | -0.360666667 | -0.134266667 | 0.2312       |
| PGAM4        | 0.035        | -0.162433333 | -0.384266667 | 0.228866667  |
| ZNF319       | -0.272033333 | -0.390233333 | -0.3908      | 0.284533333  |
| MAPKAP1      | -0.074       | -0.0532      | -0.047733333 | 0.422133333  |
| CAPZA1       | -0.143866667 | 0.044066667  | -0.328533333 | 0.343866667  |
| SOCS5        | 0.276066667  | -0.124966667 | -0.2212      | 0.397233333  |
| ATF3         | -0.196533333 | -0.4265      | -0.550766667 | 0.381533333  |

|           |              |              |              |              |
|-----------|--------------|--------------|--------------|--------------|
| FLJ10803  | -0.115066667 | 0.066366667  | -0.0805      | 0.4362       |
| MKLN1     | -0.219166667 | -0.474233333 | -0.3277      | 0.1813       |
| ZDHC6     | -0.293933333 | -0.0698      | -0.131833333 | 0.273033333  |
| KIAA1143  | -0.117666667 | -0.232966667 | -0.2948      | 0.2557       |
| SLC25A28  | -0.120833333 | -0.148966667 | -0.1588      | 0.3987       |
| PRR16     | 0.135133333  | -0.366566667 | -0.390366667 | 0.440566667  |
| STX16     | -0.5573      | -0.575133333 | -0.2806      | -0.084633333 |
| LOC93622  | -0.297433333 | -0.2294      | -0.478466667 | 0.2132       |
| HINT3     | -0.521133333 | -0.607133333 | -0.8372      | 0.067        |
| ZNF621    | -0.236566667 | -0.478366667 | -0.4946      | 0.139466667  |
| LOC652675 | -0.215666667 | -0.095266667 | -0.188333333 | 0.2722       |
| IQGAP1    | -0.2977      | -0.321233333 | -0.280533333 | 0.066433333  |
| LOC402221 | 0.3533       | -0.23        | -0.233333333 | 0.522333333  |
| CLTB      | 0.140933333  | -0.1087      | -0.1907      | 0.483233333  |
| FLJ45248  | -0.111366667 | -0.148366667 | -0.278233333 | 0.384633333  |
| LOC644863 | -0.302533333 | -0.492766667 | -0.353966667 | 0.117033333  |
| LOC651198 | -0.3505      | -0.339733333 | -0.311066667 | 0.161966667  |
| FOSB      | 0.350066667  | -0.1277      | -0.2041      | 0.729833333  |
| HDAC3     | -0.098       | -0.147533333 | -0.211533333 | 0.3925       |
| SLC25A20  | -0.4135      | -0.2362      | -0.3717      | 0.158033333  |
| NUCB2     | -0.565266667 | -0.3051      | -0.534266667 | -0.0571      |
| DCTD      | -0.1911      | -0.242033333 | -0.196933333 | 0.261833333  |
| FAM113B   | -0.2015      | -0.328433333 | -0.259766667 | 0.276333333  |
| MIDN      | -0.022233333 | -0.515033333 | -0.488066667 | 0.3318       |
| ZNF451    | -0.260966667 | -0.3703      | -0.417533333 | 0.099466667  |
| NUDT21    | -0.204833333 | -0.229033333 | -0.1468      | 0.265733333  |
| LOC728139 | -0.276166667 | -0.5262      | -0.417566667 | 0.064633333  |
| TTC23     | -0.5525      | -0.405833333 | -0.407933333 | 0.0604       |
| DYRK3     | -0.2649      | -0.347166667 | -0.2726      | 0.234833333  |
| C9orf5    | -0.2161      | -0.180366667 | -0.2238      | 0.2947       |
| EXTL2     | -0.425533333 | -0.0086      | -0.169       | 0.075466667  |
| ZNRD1     | -0.1247      | -0.191766667 | -0.384733333 | 0.256333333  |
| BSDC1     | -0.3999      | -0.5148      | -0.575366667 | -0.0613      |
| TPM4      | 0.055466667  | -0.151566667 | -0.542633333 | 0.3541       |
| MINPP1    | -0.172633333 | -0.2642      | -0.245866667 | 0.170566667  |
| CYBA      | -0.4913      | -0.532033333 | -0.250633333 | -0.0205      |
| LOC643384 | -0.455666667 | -0.454033333 | -0.414433333 | -0.015233333 |
| PLEKHM1   | -0.334033333 | -0.3113      | -0.3862      | 0.1893       |
| HRASLS    | -0.256566667 | -0.180733333 | -0.1639      | 0.302633333  |
| C16orf7   | -0.4634      | -0.498866667 | -0.513433333 | -0.054633333 |
| PDE4DIP   | -0.263633333 | -0.163433333 | -0.312133333 | 0.1332       |
| GAK       | -0.247333333 | -0.139066667 | -0.076533333 | 0.405166667  |
| EIF1AY    | -0.195666667 | -0.243966667 | -0.138233333 | 0.3249       |
| PDZRN3    | -0.062066667 | -0.402233333 | -0.709833333 | -0.1086      |
| C9orf37   | -0.251033333 | -0.2688      | -0.284466667 | 0.218266667  |
| DDX60L    | -0.393833333 | -0.273866667 | -0.196366667 | 0.292666667  |
| ATG5      | -0.4413      | -0.381433333 | -0.391033333 | 0.024        |

|              |              |              |              |              |
|--------------|--------------|--------------|--------------|--------------|
| LOC387820    | 0.044566667  | -0.045033333 | -0.2911      | 0.346366667  |
| LOC441191    | -0.020666667 | -0.1039      | -0.347233333 | 0.332866667  |
| CYB561D2     | -0.353966667 | -0.368133333 | -0.3702      | 0.181433333  |
| GXYLT2       | -0.151466667 | -0.1451      | -0.2052      | 0.323433333  |
| NFKB2        | -0.223966667 | -0.074866667 | -0.343166667 | 0.306166667  |
| ZFP37        | -0.366166667 | -0.215833333 | -0.3873      | 0.200233333  |
| DDX10        | -0.006733333 | 0.204566667  | 9.00E-04     | 0.464133333  |
| ACO1         | -0.4564      | -0.246066667 | -0.056433333 | 0.357766667  |
| LOC653232    | -0.344433333 | -0.163133333 | -0.072833333 | 0.2125       |
| H3F3B        | 0.114        | -0.526266667 | -0.794366667 | 0.1282       |
| GLG1         | -0.592833333 | -0.5621      | -0.5744      | -0.1152      |
| LOC729402    | -0.406666667 | -0.338966667 | -0.364966667 | 0.107133333  |
| PRIM2A       | 0.099333333  | 0.0449       | 0.070833333  | 0.489366667  |
| PDXK         | -0.246733333 | -0.456566667 | -0.5216      | 0.0854       |
| TMEM167B     | -0.471066667 | -0.452133333 | -0.558633333 | -0.100566667 |
| DDX46        | -0.134033333 | -0.4165      | -0.133266667 | 0.2698       |
| KCNE1L       | -0.058766667 | -0.086933333 | -0.043933333 | 0.510333333  |
| FAM156B      | -0.2818      | -0.2373      | -0.424033333 | 0.1033       |
| LOC401537    | -0.290366667 | -0.287333333 | -0.3207      | 0.118066667  |
| OSCP1        | -0.417666667 | -0.465066667 | -0.516966667 | 0.058833333  |
| HIST2H4B     | -0.143333333 | -0.305166667 | -0.205833333 | 0.2803       |
| KIF20B       | 0.053933333  | 0.1306       | 0.0165       | 0.456633333  |
| DDIT4        | -0.455533333 | -0.838566667 | -0.217166667 | -0.076633333 |
| HSDL2        | -0.333466667 | -0.197566667 | -0.1999      | 0.216333333  |
| FAM188B      | -0.373266667 | -0.1414      | -0.2319      | 0.283533333  |
| POLR2J2      | -0.342166667 | -0.301566667 | -0.4187      | 0.142866667  |
| FAF2         | -0.0221      | -0.334666667 | -0.255433333 | 0.288433333  |
| LOC100129195 | -0.407233333 | -0.344866667 | -0.220733333 | 0.053233333  |
| DYX1C1       | -0.3079      | -0.369633333 | -0.283766667 | 0.171533333  |
| CCPG1        | -0.5306      | -0.568466667 | -0.3638      | -0.179266667 |
| HCG4         | -0.111066667 | -0.333766667 | -0.236833333 | 0.388633333  |
| KISS1        | -0.110366667 | -0.061966667 | -0.1856      | 0.347666667  |
| TIPARP       | -0.0275      | -0.128466667 | -0.202133333 | 0.769133333  |
| STARD3NL     | -0.0756      | -0.1002      | -0.051433333 | 0.361        |
| PION         | -0.0907      | 0.0263       | -0.060733333 | 0.4711       |
| LOC646672    | -0.418066667 | -0.1887      | -0.2984      | 0.143166667  |
| IL12A        | 0.218933333  | 0.1354       | -0.0929      | 0.629533333  |
| B9D1         | -0.463733333 | -0.243633333 | -0.094966667 | 0.171566667  |
| FXYD5        | 0.043866667  | -0.173833333 | -0.416       | 0.430133333  |
| LOC200030    | -0.3956      | -0.3139      | -0.310633333 | 0.106466667  |
| TRNT1        | -0.226066667 | -0.1075      | -0.242733333 | 0.253633333  |
| SNRPA1       | -0.054433333 | 0.121633333  | 0.003566667  | 0.639433333  |
| TCTN1        | -0.544233333 | -0.436533333 | -0.516633333 | -0.0463      |
| COPS2        | -0.354466667 | -0.0159      | -0.1668      | 0.304        |
| LOC731486    | -0.133666667 | 0.0383       | -0.0216      | 0.3544       |
| RNU1-3       | -0.4769      | -0.324566667 | -0.499233333 | -0.0625      |
| EPPB9        | -0.407633333 | -0.292733333 | -0.164933333 | 0.098866667  |

|              |              |              |              |              |
|--------------|--------------|--------------|--------------|--------------|
| C5orf21      | -0.563866667 | -0.465866667 | -0.467433333 | -0.1265      |
| AP3S1        | -0.307566667 | -0.397766667 | -0.392866667 | 0.129833333  |
| SDSL         | -0.8657      | -0.456933333 | -0.334466667 | -0.144233333 |
| LOC100128899 | -0.187066667 | -0.017233333 | -0.153266667 | 0.229166667  |
| BCCIP        | -0.135166667 | -0.0551      | -0.080166667 | 0.435366667  |
| AP3B1        | -0.220233333 | -0.3651      | -0.2636      | 0.133766667  |
| SPP1         | -0.211666667 | -0.4801      | -0.211733333 | 0.342066667  |
| ARPC4        | 0.0124       | -0.2713      | -0.2435      | 0.3117       |
| FEZ2         | 0.005233333  | -0.129733333 | -0.277166667 | 0.229566667  |
| TANK         | -0.324066667 | -0.481766667 | -0.434766667 | 0.0233       |
| SEC61B       | -0.1415      | -0.149433333 | -0.565233333 | 0.162933333  |
| LOC388707    | -0.1881      | -0.5162      | -0.4396      | 0.1          |
| LOC100134584 | -0.1921      | -0.020066667 | -0.126633333 | 0.337666667  |
| RBCK1        | -0.700466667 | -0.5161      | -0.414366667 | -0.0216      |
| TJP2         | -0.052133333 | 0.0176       | -0.1919      | 0.440433333  |
| CCT5         | -0.1684      | -0.0905      | -0.2669      | 0.3153       |
| FOXK1        | -0.194233333 | -0.313166667 | -0.234533333 | 0.262566667  |
| B3GNTL1      | -0.3391      | -0.163533333 | -0.1152      | 0.049933333  |
| LOC647285    | -0.439866667 | -0.4417      | -0.1943      | 0.19         |
| BTG1         | -0.746533333 | -0.550933333 | -0.510466667 | -0.1576      |
| CHPF2        | -0.1497      | -0.215666667 | -0.444833333 | 0.253        |
| LOC643531    | -0.3835      | -0.495233333 | -0.264366667 | 0.061466667  |
| MEA1         | -0.1847      | -0.287333333 | -0.274533333 | 0.2329       |
| UBE2E3       | -0.026066667 | -0.264833333 | -0.240133333 | 0.1952       |
| TTRAP        | -0.316033333 | -0.175466667 | -0.288266667 | 0.13         |
| RPL29        | 0.3386       | -0.090766667 | -0.047       | 0.5736       |
| CCDC24       | -0.562966667 | -0.5278      | -0.520166667 | -0.149266667 |
| EBI3         | -0.206333333 | -0.211233333 | -0.216866667 | 0.2285       |
| SLC7A1       | -0.335633333 | -0.5063      | -0.3648      | 0.056266667  |
| GLTP         | -0.485633333 | -0.118       | -0.150833333 | 0.2146       |
| SS18         | 0.064        | -0.202366667 | -0.401233333 | 0.3785       |
| CD47         | -0.442633333 | -0.427866667 | -0.32        | -0.012466667 |
| LOC730020    | -0.239366667 | -0.231533333 | -0.418533333 | 0.189866667  |
| NPC1         | -0.227133333 | -0.191566667 | 0.2064       | 0.2116       |
| CCDC93       | -0.286633333 | -0.246633333 | -0.2893      | 0.242733333  |
| PLEKHA2      | -0.4085      | -0.474       | -0.214466667 | -0.083       |
| LOC728811    | -0.550166667 | -0.534833333 | -0.558266667 | -0.075466667 |
| TMEM9B       | -0.573733333 | -0.3996      | -0.157066667 | 0.173133333  |
| UBE2J2       | 0.035466667  | -0.230233333 | -0.075866667 | 0.571033333  |
| QSOX2        | -0.110466667 | 0.012333333  | -0.2976      | 0.328833333  |
| RIOK3        | -0.205233333 | -0.260333333 | -0.465733333 | 0.173033333  |
| SLFN5        | -0.857366667 | -0.525766667 | -0.519233333 | -0.247466667 |
| MEX3B        | -0.3238      | -0.4467      | -0.690566667 | 0.108166667  |
| BRPF1        | -0.038966667 | -0.3401      | -0.352766667 | 0.2215       |
| NT5C         | -0.250566667 | -0.370466667 | -0.3763      | 0.1352       |
| MGAT4B       | -0.372466667 | -0.334       | -0.3087      | 0.165733333  |
| LOC732007    | 0.026        | -0.065166667 | -0.145233333 | 0.271733333  |

|              |              |              |              |              |
|--------------|--------------|--------------|--------------|--------------|
| SPC24        | -0.131533333 | -0.0841      | 0.0219       | 0.3135       |
| UNC45A       | -0.3669      | -0.274033333 | -0.414666667 | -0.0539      |
| RPA3         | -0.324966667 | -0.305866667 | -0.300933333 | 0.1212       |
| ZNF215       | -0.002966667 | -0.067066667 | -0.090366667 | 0.4018       |
| TRADD        | -0.452566667 | -0.490366667 | -0.559633333 | -0.0765      |
| LOC646688    | -0.4914      | -0.428933333 | -0.318266667 | -0.052933333 |
| PRKAR1B      | -0.336533333 | -0.2327      | -0.165533333 | 0.208766667  |
| UPF3A        | -0.309066667 | -0.307066667 | -0.2575      | 0.1654       |
| LOC642812    | -0.124733333 | -0.110266667 | -0.206166667 | 0.3261       |
| BCAR3        | 0.132266667  | 0.0114       | -0.0785      | 0.540566667  |
| OSBPL10      | 0.289866667  | -0.086666667 | -0.727433333 | 0.432866667  |
| ZDHHC4       | -0.6386      | -0.637766667 | -0.323       | -0.1609      |
| CYB5D1       | -0.1237      | -0.363866667 | -0.411566667 | 0.215666667  |
| AKTIP        | -0.3399      | -0.407166667 | -0.4849      | 0.030866667  |
| PSMC3IP      | 0.055433333  | -0.144266667 | -0.110066667 | 0.354366667  |
| LOC100128337 | -0.3468      | -0.143233333 | -0.251666667 | 0.1314       |
| LOC644496    | -0.053866667 | -0.1309      | -0.224533333 | 0.402833333  |
| ARL4C        | -0.0048      | -0.302966667 | -0.212766667 | 0.4835       |
| RIN2         | -0.587533333 | -0.509066667 | -0.449833333 | -0.0399      |
| RAB23        | 0.0311       | 0.001466667  | -0.0509      | 0.471766667  |
| TBC1D2B      | -0.304966667 | -0.363433333 | -0.4357      | 0.1526       |
| LOC100129685 | -0.5636      | -0.191566667 | -0.5493      | -0.143433333 |
| MAPK6        | 0.090333333  | -0.302666667 | -0.460233333 | 0.2553       |
| ST6GALNAC4   | -0.461466667 | -0.215266667 | -0.1793      | 0.0444       |
| UGCGL2       | -0.428466667 | -0.335933333 | -0.4984      | 0.013366667  |
| SPATS2       | -0.3642      | -0.240033333 | -0.244866667 | 0.112266667  |
| GARS         | -0.4481      | -0.284333333 | -0.587933333 | -0.0467      |
| TNPO1        | 0.139433333  | -0.151766667 | -0.147333333 | 0.314933333  |
| PTBP2        | -0.249733333 | -0.294333333 | -0.363566667 | 0.1117       |
| APPL2        | -0.249666667 | -0.263733333 | -0.271566667 | 0.2299       |
| LOC730820    | -0.422566667 | -0.499466667 | -0.2997      | 0.0826       |
| MRPL10       | -0.440466667 | -0.387266667 | -0.474866667 | 0.030433333  |
| TRAPPC2P1    | -0.238666667 | -0.3909      | -0.207933333 | 0.222666667  |
| ZP3          | -0.4092      | -0.339866667 | -0.3113      | 0.117233333  |
| ATP1B1       | -0.359366667 | -0.539166667 | -0.745       | 0.0093       |
| SLC25A38     | -0.269466667 | -0.280233333 | -0.324866667 | 0.1942       |
| RUNX1        | -0.169333333 | -0.242633333 | -0.607133333 | 0.196533333  |
| APOBEC3F     | -0.1458      | -0.325266667 | -0.3752      | 0.158333333  |
| ARGLU1       | 0.000133333  | -0.249066667 | -0.1433      | 0.415633333  |
| IP6K2        | -0.245066667 | -0.4903      | -0.307       | 0.041733333  |
| C20orf24     | 0.001033333  | -0.1079      | -0.225733333 | 0.339        |
| SNORD16      | 0.006333333  | -0.131433333 | -0.045633333 | 0.387733333  |
| PPP1R11      | -0.3037      | -0.4149      | -0.394233333 | 0.0815       |
| PPP2CA       | -0.083633333 | -0.096266667 | -0.0887      | 0.3615       |
| SCNN1D       | -0.3718      | -0.379833333 | -0.442566667 | 0.1067       |
| CADPS        | -0.424333333 | -0.3678      | -0.333033333 | 0.159533333  |
| MAN2B2       | -0.410266667 | -0.5002      | -0.4156      | 0.000133333  |



|           |              |              |              |              |
|-----------|--------------|--------------|--------------|--------------|
| RPL14L    | -0.548233333 | -0.350833333 | -0.3766      | 0.029633333  |
| PCDHB2    | -0.442466667 | -0.321433333 | -0.376933333 | 0.053033333  |
| TTC14     | -0.404333333 | -0.221666667 | -0.203733333 | 0.187533333  |
| SMN1      | -0.121533333 | -0.058466667 | -0.075066667 | 0.311        |
| DPM2      | -0.1904      | -0.232666667 | -0.305433333 | 0.224033333  |
| RDH5      | -0.278133333 | -0.163166667 | 0.195933333  | 0.291966667  |
| PIAS1     | -0.105766667 | -0.089533333 | -0.156933333 | 0.295033333  |
| DPM1      | -0.162433333 | -0.2078      | -0.266233333 | 0.191166667  |
| PGM3      | 0.0121       | -0.108466667 | -0.4992      | 0.189        |
| PNPLA2    | -0.234       | -0.465566667 | -0.348666667 | 0.1653       |
| RNF114    | -0.329266667 | -0.264933333 | -0.197766667 | 0.174        |
| RNASEH2B  | -0.249033333 | -0.197233333 | -0.223833333 | 0.109933333  |
| DNAJC7    | -0.3244      | -0.2488      | -0.2395      | 0.1505       |
| IDUA      | -0.494133333 | -0.544633333 | -0.412766667 | -0.025833333 |
| SPIN1     | -0.166833333 | -0.094633333 | -0.213166667 | 0.199333333  |
| LINS1     | -0.0809      | -0.156366667 | -0.233266667 | 0.346666667  |
| TSC1      | -0.4254      | -0.5637      | -0.356666667 | 0.1279       |
| SEC62     | -0.4045      | -0.462133333 | -0.284566667 | -0.0034      |
| TRIM39    | -0.205333333 | -0.3665      | -0.367833333 | 0.3345       |
| STK19     | -0.353833333 | -0.416366667 | -0.653433333 | 0.034766667  |
| MALT1     | 0.164033333  | -0.0061      | -0.1566      | 0.5729       |
| LOC151579 | 0.002366667  | 0.014466667  | -0.2093      | 0.380466667  |
| HIGD1A    | -0.106833333 | -0.112366667 | -0.146       | 0.332966667  |
| MAP7D1    | 0.132666667  | -0.3187      | 0.159933333  | 0.578966667  |
| DAGLB     | -0.217766667 | -0.055166667 | -0.207633333 | 0.316633333  |
| ATF4      | -0.555566667 | -0.902666667 | -0.9692      | -0.411566667 |
| LYRM4     | -0.338733333 | -0.264566667 | -0.442833333 | 0.1262       |
| LIME1     | -0.256466667 | -0.318966667 | -0.3862      | 0.275566667  |
| RAP2C     | -0.1738      | -0.209633333 | -0.220766667 | 0.277033333  |
| SPRYD3    | -0.031233333 | -0.288266667 | -0.152733333 | 0.299066667  |
| ETF1      | -0.058066667 | -0.0684      | -0.118433333 | 0.3109       |
| LOC392437 | -0.6011      | -0.583933333 | -0.1727      | 0.0407       |
| COPS6     | -0.0587      | 0.069766667  | -0.169266667 | 0.4584       |
| SPTY2D1   | -0.3488      | -0.020866667 | -0.2833      | 0.201666667  |
| VHL       | -0.070766667 | -0.088666667 | -0.092466667 | 0.4121       |
| KLF12     | -0.155733333 | -0.249866667 | -0.191966667 | 0.146666667  |
| ZNF32     | -0.5687      | -0.479666667 | -0.449866667 | -0.1165      |
| JMJD1C    | 0.098333333  | -0.009866667 | -0.135233333 | 0.412        |
| LOC338799 | -0.4617      | -0.279066667 | -0.257833333 | 0.113933333  |
| DNAJA2    | -0.031533333 | -0.093333333 | -0.212866667 | 0.374433333  |
| FLJ20021  | -0.3736      | -0.408233333 | -0.363033333 | 0.096233333  |
| LRRC37B   | -0.247833333 | -0.469466667 | -0.472333333 | 0.1436       |
| ATPBD1B   | -0.143766667 | -0.250866667 | -0.5177      | 0.149833333  |
| FAM96B    | -0.327866667 | -0.225433333 | -0.297266667 | 0.169033333  |
| PSMA2     | -0.208966667 | -0.191633333 | -0.186766667 | 0.276666667  |
| CARD10    | 0.0633       | -0.039733333 | -0.249933333 | 0.4333       |
| C17orf45  | -0.531366667 | -0.486166667 | -0.242866667 | 0.034        |

|           |              |              |              |              |
|-----------|--------------|--------------|--------------|--------------|
| BRIX1     | 0.018866667  | 0.0265       | -0.0858      | 0.4525       |
| ACSL4     | 0.0368       | -0.072033333 | -0.283133333 | 0.341666667  |
| C3orf19   | -0.4041      | -0.4248      | -0.434866667 | 0.084166667  |
| RNF216L   | -0.182966667 | -0.4765      | -0.429866667 | 0.134633333  |
| LOC652773 | -0.0421      | -0.120633333 | -0.219266667 | 0.2766       |
| ZNF622    | -0.250533333 | -0.047666667 | -0.2157      | 0.4498       |
| LOC401640 | -0.2973      | -0.291833333 | -0.326       | 0.0549       |
| C15orf23  | 0.173633333  | -0.0617      | 0.044533333  | 0.440966667  |
| TMEM138   | -0.2844      | -0.243366667 | -0.038866667 | 0.345333333  |
| ZCCHC5    | 0.176566667  | -0.287966667 | -0.435266667 | 0.2755       |
| CSNK1G1   | -0.060966667 | -0.128133333 | -0.157233333 | 0.376833333  |
| CNOT2     | -0.2335      | -0.178666667 | -0.418833333 | 0.293933333  |
| LOX       | 0.056        | -0.0649      | -0.853       | 0.042966667  |
| LOC728565 | -0.238833333 | -0.339333333 | -0.206       | 0.1224       |
| PHF15     | -0.3822      | -0.4514      | -0.288433333 | 0.0297       |
| MAP3K4    | -0.0925      | -0.200166667 | -0.364533333 | 0.220766667  |
| LOC728650 | -0.304366667 | -0.3227      | -0.770933333 | -0.128733333 |
| RAD1      | -0.015066667 | -0.209566667 | -0.192066667 | 0.3554       |
| CCDC90B   | -0.2827      | -0.304       | -0.344033333 | -0.045733333 |
| MGC4677   | 0.3104       | -0.114433333 | -0.417066667 | 0.4364       |
| KIAA0182  | -0.324533333 | -0.1788      | -0.4158      | 0.069233333  |
| MXRA7     | -0.271333333 | -0.308466667 | -0.228       | 0.1901       |
| LOC728572 | -0.4201      | -0.231966667 | -0.4834      | 0.0369       |
| B4GALT1   | -0.0728      | -0.2647      | -0.411533333 | 0.206566667  |
| ZFPM1     | -0.637933333 | -0.418566667 | -0.2378      | 0.105433333  |
| SEC14L2   | 0.052933333  | -0.041566667 | -0.163633333 | 0.4677       |
| CSAD      | -0.416066667 | -0.327266667 | -0.4597      | 0.0482       |
| RPLP0     | -0.266233333 | -0.478333333 | -0.176333333 | 0.132366667  |
| ZGPAT     | -0.128333333 | -0.175033333 | -0.0936      | 0.1629       |
| GLB1      | -0.5101      | -0.5219      | -0.408266667 | 0.0279       |
| FAM104A   | -0.194533333 | -0.2245      | -0.352333333 | 0.290533333  |
| ARMCX2    | -0.443666667 | -0.450666667 | -0.375166667 | -0.093166667 |
| LAMC1     | -0.311066667 | -0.1209      | -0.196366667 | 0.0883       |
| ARHGAP10  | -0.020566667 | -0.133033333 | -0.085366667 | 0.322666667  |
| LPIN2     | -0.200633333 | -0.2518      | -0.1423      | 0.2608       |
| PPDPF     | -0.351366667 | -0.3528      | -0.4074      | -0.059166667 |
| FBXL2     | -0.463633333 | -0.386133333 | -0.360533333 | -0.056566667 |
| PTP4A2    | -0.169033333 | -0.255033333 | -0.253366667 | 0.196266667  |
| POLR2J3   | -0.210833333 | -0.263066667 | -0.2274      | 0.209066667  |
| GALNT4    | 0.108066667  | 0.050066667  | -0.045733333 | 0.411233333  |
| IARS      | -0.4811      | -0.482933333 | -0.268333333 | 0.004766667  |
| C10orf88  | 0.015433333  | -0.229066667 | -0.179466667 | 0.330366667  |
| ING3      | -0.221833333 | -0.324166667 | -0.2867      | 0.2388       |
| HOXC13    | 0.001933333  | -0.185733333 | -0.185466667 | 0.370633333  |
| GPRASP2   | -0.277533333 | -0.1766      | -0.303766667 | 0.1898       |
| PFDN1     | -0.073766667 | -0.1186      | -0.024166667 | 0.318166667  |
| ACAD11    | -0.545966667 | -0.464233333 | -0.221833333 | -0.0219      |

|              |              |              |              |              |
|--------------|--------------|--------------|--------------|--------------|
| MXD1         | -0.413       | -0.4415      | -0.314666667 | 0.092366667  |
| DENND5A      | -0.214933333 | -0.056833333 | -0.3883      | 0.1778       |
| TATDN2       | -0.0865      | -0.216633333 | -0.220866667 | 0.349733333  |
| LOC652608    | -0.3753      | -0.043333333 | -0.485466667 | 0.0129       |
| RSPH3        | -0.367866667 | -0.437566667 | -0.619366667 | -0.071166667 |
| RNU4-2       | -0.405966667 | -0.266033333 | -0.341333333 | -0.057166667 |
| TNNT1        | -0.389933333 | -0.460666667 | -0.399266667 | -0.0192      |
| CLK1         | -0.401266667 | -0.232066667 | -0.2069      | 0.176833333  |
| RABL3        | -0.166866667 | -0.0414      | -0.086633333 | 0.299        |
| PECI         | -0.0352      | -0.1155      | -0.124466667 | 0.334466667  |
| GUSBL1       | -0.475366667 | -0.333766667 | -0.3446      | -0.266966667 |
| LOC344595    | -0.116933333 | -0.354433333 | -0.494233333 | 0.065866667  |
| C9orf100S    | -0.3313      | -0.3638      | -0.4779      | 0.007633333  |
| DHX29        | -0.0501      | -0.121633333 | -0.267933333 | 0.278933333  |
| LOC653994    | 0.1712       | -0.030133333 | -0.294933333 | 0.4942       |
| TMEM167A     | -0.284233333 | -0.2084      | -0.2606      | 0.195333333  |
| PHAX         | -0.053166667 | -0.0495      | -0.139333333 | 0.397933333  |
| WASF3        | 0.013633333  | -0.150566667 | -0.359433333 | 0.239766667  |
| TRMT11       | -0.1397      | -0.2432      | -0.2128      | 0.172466667  |
| HEBP2        | -0.474966667 | -0.3411      | -0.309733333 | -0.002833333 |
| TUBA3D       | 0.0547       | 0.215066667  | -0.226633333 | 0.368066667  |
| PPP4R1       | 0.0962       | -0.169433333 | -0.291566667 | 0.303833333  |
| LOC100128191 | 0.0083       | -0.0497      | 0.0173       | 0.493166667  |
| C12orf10     | -0.2089      | -0.286233333 | -0.3413      | 0.096566667  |
| EPOR         | -0.458366667 | -0.626133333 | -0.507466667 | -0.1453      |
| DBNL         | -0.187633333 | -0.089666667 | -0.1039      | 0.3288       |
| ALKBH5       | -0.304966667 | -0.2926      | -0.428833333 | 0.061233333  |
| RPS4Y1       | -0.352466667 | -0.349333333 | -0.284833333 | 0.1876       |
| BAT4         | -0.095766667 | 0.040466667  | 0.023433333  | 0.4896       |
| ANAPC13      | -0.049333333 | -0.144566667 | -0.287133333 | 0.2352       |
| RN5S9        | -0.398       | -0.4003      | -0.486933333 | -0.014233333 |
| C3orf52      | 0.185366667  | 0.229866667  | 0.053233333  | 0.602        |
| SLC1A5       | -0.2693      | -0.1842      | -0.407066667 | 0.1317       |
| LOC283953    | -0.3029      | -0.4428      | -0.457833333 | 0.135266667  |
| ACOX2        | -0.028466667 | 0.348066667  | -0.185166667 | 0.439133333  |
| LOC729342    | -0.5181      | -0.234933333 | -0.5566      | -0.136966667 |
| SLC2A10      | -0.458966667 | -0.376833333 | -0.6454      | -0.169033333 |
| SFRS2IP      | -0.421       | -0.3243      | -0.3368      | 0.021766667  |
| HIST3H2A     | -0.642833333 | -0.431833333 | -0.274166667 | 0.006633333  |
| LRP10        | -0.469333333 | -0.461766667 | -0.316733333 | -0.011333333 |
| CEP290       | -0.214166667 | -0.039566667 | -0.2055      | 0.182533333  |
| GRPEL1       | 0.2239       | 0.1705       | 0.091633333  | 0.448333333  |
| TUBB2C       | 0.270933333  | 0.026966667  | -0.0155      | 0.6186       |
| CTSA         | -0.493666667 | -0.616466667 | -0.3774      | -0.030866667 |
| LOC202051    | -0.3866      | -0.324433333 | -0.3215      | 0.0977       |
| CDRT4        | -0.256666667 | -0.375233333 | -0.649533333 | -0.030166667 |
| SSNA1        | -0.264       | -0.281166667 | -0.2587      | 0.198033333  |

|           |              |              |              |              |
|-----------|--------------|--------------|--------------|--------------|
| WWC3      | -0.421333333 | -0.1975      | -0.291433333 | 0.010766667  |
| UBE2A     | -0.1232      | -0.255433333 | -0.293266667 | 0.2719       |
| PPIB      | -0.193166667 | -0.112333333 | -0.208566667 | -0.0481      |
| BCAP29    | 0.047566667  | -0.019633333 | -0.239433333 | 0.481766667  |
| EBPL      | -0.158366667 | -0.053833333 | -0.138       | 0.245433333  |
| OAZ2      | -0.071066667 | -0.159866667 | -0.2138      | 0.3077       |
| ZNF627    | -0.370933333 | -0.517333333 | -0.3888      | -0.013566667 |
| IFI27L1   | -0.632966667 | -0.325866667 | -0.2534      | -0.040833333 |
| LOC728128 | -0.2018      | -0.223633333 | -0.3796      | 0.166466667  |
| SC65      | -0.294966667 | -0.3968      | -0.270133333 | 0.043166667  |
| LYRM1     | -0.4529      | -0.306733333 | -0.3339      | 0.003633333  |
| ETHE1     | -0.1563      | -0.108966667 | -0.115766667 | 0.3062       |
| PRELID1   | -0.055766667 | -0.078566667 | -0.203433333 | 0.394866667  |
| HERPUD1   | -0.347666667 | -0.2935      | -0.548733333 | -0.037266667 |
| TMTC3     | -0.090466667 | -0.079033333 | -0.2449      | 0.2504       |
| PLIN5     | -0.163466667 | -0.140866667 | 0.105333333  | 0.490166667  |
| WSB2      | -0.260533333 | 0.004433333  | -0.046066667 | 0.186033333  |
| KIAA1217  | -0.1248      | -0.3874      | -0.409166667 | 0.058233333  |
| PIM1      | -0.145033333 | -0.271733333 | -0.245966667 | 0.2355       |
| TPK1      | -0.381266667 | -0.3403      | -0.317233333 | 0.0981       |
| CCDC71    | -0.386733333 | -0.2125      | -0.3242      | -0.018166667 |
| ROBO1     | -0.412166667 | -0.4575      | -0.3767      | -0.012366667 |
| B3GALT6   | -0.371266667 | -0.145833333 | -0.350833333 | 0.094        |
| SPG7      | -0.401233333 | -0.2791      | -0.2461      | 0.030866667  |
| BAZ1B     | -0.136066667 | -0.188833333 | -0.098833333 | 0.264466667  |
| C21orf59  | 0.044033333  | -0.023366667 | -0.328533333 | 0.2421       |
| CD46      | -0.214466667 | -0.348266667 | -0.273266667 | 0.014733333  |
| CCDC102A  | -0.248233333 | -0.302733333 | -0.442833333 | 0.145933333  |
| RNU1A3    | -0.504433333 | -0.319733333 | -0.4096      | -0.102766667 |
| ATPIF1    | -0.227733333 | -0.287633333 | -0.368333333 | 0.097        |
| HIF1A     | 0.034666667  | -0.1986      | -0.1635      | 0.171133333  |
| ITGB3BP   | -0.055866667 | -0.076266667 | -0.1354      | 0.213666667  |
| BICD1     | -0.171466667 | -0.1364      | -0.133666667 | 0.3457       |
| ZNF271    | -0.380033333 | -0.2145      | -0.3401      | 0.103066667  |
| SPAG16    | -0.232866667 | -0.125066667 | -0.386533333 | 0.005266667  |
| LOC728362 | -0.405833333 | -0.202333333 | -0.286133333 | -0.0776      |
| PCNP      | -0.2334      | -0.353466667 | -0.252933333 | 0.070633333  |
| TSPAN31   | -0.5606      | -0.428833333 | -0.229533333 | -0.151233333 |
| HDGF      | -0.064033333 | 0.007233333  | -0.171366667 | 0.318        |
| TSR1      | -0.0021      | -0.132566667 | -0.257433333 | 0.310333333  |
| KCTD11    | -0.126833333 | -0.284933333 | -0.248266667 | 0.236066667  |
| NPLOC4    | -0.0697      | -0.3858      | -0.222033333 | 0.292466667  |
| RN7SK     | -0.436866667 | -0.491866667 | -0.545833333 | 0.088266667  |
| EFTUD1    | -0.1511      | -0.015366667 | -0.253733333 | 0.128066667  |
| BMS1      | -0.159       | -0.1031      | -0.337933333 | 0.181666667  |
| STAG3L1   | -0.219233333 | -0.1308      | -0.125966667 | 0.251833333  |
| LEPR      | -0.142966667 | -0.183366667 | -0.178266667 | 0.294833333  |

|              |              |              |              |              |
|--------------|--------------|--------------|--------------|--------------|
| LOC389156    | -0.381266667 | -0.325933333 | -0.206766667 | 0.032933333  |
| ALDH6A1      | -0.598966667 | -0.461566667 | -0.312       | -0.156133333 |
| LOC440928    | -0.455366667 | -0.474833333 | -0.3712      | -0.009866667 |
| ALDH3A2      | -0.2871      | -0.2052      | -0.342533333 | 0.158166667  |
| ABT1         | -0.039933333 | -0.010166667 | -0.092366667 | 0.3508       |
| CLEC2B       | -0.184       | -0.2459      | -0.2906      | 0.042066667  |
| SNX6         | -0.261066667 | -0.298733333 | -0.250066667 | 0.162666667  |
| CDK9         | -0.1099      | -0.141266667 | -0.3229      | 0.111433333  |
| TMEM203      | -0.196833333 | -0.296466667 | -0.416866667 | 0.0712       |
| METTL2A      | -0.335       | -0.0654      | -0.2414      | 0.0325       |
| HLA-C        | -0.325866667 | -0.311633333 | -0.2533      | 0.024833333  |
| LOC646996    | -0.229533333 | -0.1281      | -0.016233333 | 0.273666667  |
| ZNF280D      | -0.174733333 | -0.336533333 | -0.185166667 | 0.2421       |
| KLF10        | 0.175366667  | -0.111066667 | -0.191266667 | 0.392566667  |
| MORN4        | -0.3795      | -0.141       | -0.381       | 0.077233333  |
| PANX2        | -0.2611      | -0.311066667 | -0.821933333 | 0.031233333  |
| PFKP         | 0.1131       | -0.0184      | -0.132066667 | 0.312766667  |
| STYXL1       | -0.242933333 | -0.310666667 | -0.413366667 | 0.067066667  |
| EXT2         | -0.1835      | -0.362033333 | -0.295166667 | 0.206733333  |
| FAM70B       | 0.014833333  | -0.041333333 | -0.0969      | 0.291866667  |
| AGFG1        | -0.1322      | -0.3258      | -0.253433333 | 0.1395       |
| TMEM80       | -0.468666667 | -0.4717      | -0.396866667 | 0.021033333  |
| TOB1         | -0.087433333 | -0.463733333 | -0.333433333 | 0.099533333  |
| STAMBPL1     | 0.082933333  | 0.293933333  | -0.036133333 | 0.503833333  |
| PDIA3P       | -0.3643      | -0.294966667 | -0.4474      | -0.0376      |
| LOC654350    | -0.522066667 | -0.2579      | -0.493233333 | -0.0676      |
| LOC169834    | -0.339033333 | -0.142766667 | -0.189266667 | 0.096033333  |
| SERP1        | -0.125266667 | -0.2225      | -0.478033333 | 0.083866667  |
| OGFR         | -0.140833333 | -0.106       | -0.2712      | 0.3001       |
| SNORA61      | -0.080766667 | -0.027433333 | -0.081566667 | 0.190966667  |
| LOC728640    | -0.2123      | -0.0737      | -0.079933333 | 0.257466667  |
| FAM18B2      | 0.1017       | -0.278633333 | -0.365       | 0.135666667  |
| GNG10        | -0.229333333 | -0.213033333 | -0.223933333 | 0.204833333  |
| EPB41L2      | -0.157133333 | -0.160133333 | -0.152366667 | 0.1975       |
| UGT2B17      | -0.6531      | -0.521666667 | -0.578266667 | -0.1256      |
| C16orf87     | -0.0886      | -0.030266667 | -0.075966667 | 0.366066667  |
| MRFAP1       | -0.1013      | -0.225166667 | -0.183666667 | 0.283166667  |
| LOC441073    | -0.4495      | -0.3721      | -0.411766667 | -0.095333333 |
| LOC727820    | -0.426566667 | -0.3353      | -0.3187      | 0.074766667  |
| RAP1BL       | -0.041366667 | -0.094       | -0.136433333 | 0.300266667  |
| KLF4         | 0.041166667  | -0.253433333 | -0.435033333 | 0.3094       |
| LOC440459    | -0.1811      | -0.0476      | 0.3901       | 0.3304       |
| LOC100133233 | -0.193466667 | -0.122466667 | -0.098866667 | 0.216766667  |
| SFRS6        | -0.102433333 | -0.2488      | -0.403166667 | 0.201266667  |
| UNC93B1      | -0.338866667 | -0.315633333 | -0.301666667 | 0.045833333  |
| LOC440093    | -0.023533333 | -0.189866667 | -0.153133333 | 0.2276       |
| SDCCAG10     | -0.195466667 | -0.1052      | -0.165266667 | 0.344533333  |

|           |              |              |              |              |
|-----------|--------------|--------------|--------------|--------------|
| MSRB2     | -0.6308      | -0.446266667 | -0.142033333 | -0.104366667 |
| SNORA62   | 0.019333333  | -0.046933333 | -0.1422      | 0.282233333  |
| TMEM217   | -0.093133333 | -0.238166667 | -0.264066667 | 0.251733333  |
| LOC728059 | 0.047        | -0.095366667 | -0.168633333 | 0.3194       |
| FOSL2     | -0.041333333 | -0.346233333 | -0.267466667 | 0.159633333  |
| UPP1      | -0.0846      | -0.347       | -0.339566667 | 0.315        |
| METTL6    | -0.172066667 | -0.204633333 | -0.232133333 | 0.2709       |
| NME6      | -0.2217      | -0.087866667 | -0.218533333 | 0.239633333  |
| VAMP2     | -0.215566667 | -0.452466667 | -0.4221      | 0.149433333  |
| AK3       | -0.500866667 | -0.432233333 | -0.2529      | -0.099833333 |
| ZCCHC9    | -0.2649      | -0.202633333 | -0.329533333 | 0.092        |
| CPPED1    | -0.079233333 | -0.1367      | -0.140533333 | 0.351233333  |
| C3orf75   | -0.289533333 | -0.088066667 | -0.0604      | 0.246033333  |
| MTRF1L    | -0.127666667 | -0.004966667 | 0.013933333  | 0.313933333  |
| LOC441154 | -0.507366667 | -0.204966667 | -0.307233333 | -0.081266667 |
| HTR7      | -0.047333333 | -0.067133333 | -0.013233333 | 0.410533333  |
| LOC643790 | 0.015766667  | -0.170466667 | -0.157       | 0.300433333  |
| ZDHHC7    | -0.228233333 | -0.338933333 | -0.357533333 | 0.0568       |
| RIOK2     | -0.1353      | -0.177433333 | -0.472766667 | 0.197466667  |
| FST       | 0.782033333  | -0.144566667 | -0.624       | 0.6685       |
| FAM18B    | 0.009833333  | -0.091733333 | -0.3474      | 0.2241       |
| FNBP1     | -0.345866667 | -0.305633333 | -0.243566667 | 0.129666667  |
| CCDC84    | -0.1564      | -0.1299      | -0.112566667 | 0.2164       |
| LOC643100 | -0.164633333 | -0.221866667 | -0.253133333 | 0.1471       |
| NCOA3     | -0.113266667 | -0.386833333 | -0.225266667 | 0.216733333  |
| DNAJC9    | 0.11         | -0.0785      | -0.139466667 | 0.4345       |
| LOC132241 | -0.2441      | -0.274166667 | -0.280566667 | 0.106333333  |
| FAM156A   | -0.109633333 | -0.2605      | -0.2199      | 0.2263       |
| HIF1AN    | -0.2259      | -0.129066667 | -0.178766667 | 0.128466667  |
| TAF10     | -0.3525      | -0.355433333 | -0.375366667 | 0.038633333  |
| SLC25A12  | -0.3578      | -0.374533333 | -0.354433333 | -0.043033333 |
| NPEPPS    | -0.1893      | -0.280266667 | -0.158566667 | 0.1211       |
| NAP1L4    | -0.118233333 | -0.0374      | -0.033966667 | 0.3044       |
| OSBPL8    | -0.265133333 | -0.368566667 | -0.1577      | 0.1197       |
| IFRD2     | -0.116633333 | 0.033033333  | -0.210733333 | 0.3386       |
| ANXA7     | -0.190566667 | -0.321033333 | -0.2114      | 0.157666667  |
| LCOR      | -0.166533333 | -0.1171      | -0.115266667 | 0.2189       |
| EDARADD   | -0.1457      | -0.232066667 | -0.2474      | 0.151166667  |
| AUH       | -0.3085      | -0.454066667 | -0.350666667 | -0.021333333 |
| KIAA1370  | -0.506166667 | -0.481233333 | -0.3908      | -0.108033333 |
| DDX56     | -0.1087      | 0.083066667  | -0.0232      | 0.419833333  |
| LOC653344 | -0.3876      | -0.293633333 | -0.5016      | -0.1136      |
| POLH      | -0.056633333 | -0.025566667 | 0.0328       | 0.4045       |
| TMEM107   | -0.301       | -0.2337      | -0.130066667 | 0.056566667  |
| NLGN2     | -0.343066667 | -0.388433333 | -0.3431      | 0.0928       |
| UBXN6     | -0.410666667 | -0.376666667 | -0.274133333 | 0.005966667  |
| LOC729843 | -0.593633333 | -0.361266667 | -0.298366667 | -0.014366667 |

|              |              |              |              |              |
|--------------|--------------|--------------|--------------|--------------|
| GPC1         | -0.092066667 | -0.308233333 | -0.3618      | 0.3061       |
| POLR2C       | -0.102933333 | -0.036566667 | -0.3689      | 0.194233333  |
| RNU4-1       | -0.279166667 | -0.126766667 | -0.1083      | 0.066866667  |
| LOC100131672 | -0.382833333 | -0.0534      | -0.505766667 | -0.143366667 |
| PPAPDC1B     | -0.316433333 | -0.308366667 | -0.534633333 | -0.134933333 |
| SNORA6       | -0.100566667 | -0.094766667 | -0.012766667 | 0.293966667  |
| PSMD9        | -0.1122      | -0.1439      | -0.4457      | 0.248033333  |
| WDR1         | 0.126433333  | -0.041933333 | -0.349266667 | 0.2609       |
| SLC41A2      | -0.206133333 | -0.275666667 | -0.332833333 | 0.1344       |
| WFS1         | -0.2615      | -0.128166667 | -0.241333333 | 0.1458       |
| FAM175B      | -0.0756      | -0.166766667 | -0.246766667 | 0.257833333  |
| RP5-1022P6.2 | -0.3403      | -0.237633333 | -0.0587      | 0.0164       |
| HDGFRP3      | -0.263366667 | -0.196466667 | -0.0547      | 0.312933333  |
| PRKAB1       | -0.1046      | -0.221733333 | -0.405133333 | 0.261233333  |
| RUNDC1       | -0.021933333 | -0.346933333 | -0.409133333 | 0.143833333  |
| C1GALT1      | -0.1528      | -0.030266667 | -0.065633333 | 0.2834       |
| AES          | -0.35        | -0.384933333 | -0.2297      | 0.001733333  |
| SLC2A6       | -0.259833333 | -0.1914      | -0.014866667 | 0.314033333  |
| LOC651919    | -0.133033333 | 0.0618       | -0.144933333 | 0.217        |
| RPL7A        | -0.387366667 | -0.2702      | -0.256233333 | 0.1053       |
| FTSJD1       | -0.037966667 | -0.3927      | -0.276466667 | 0.236866667  |
| BRP44        | -0.176633333 | -0.251266667 | -0.127933333 | 0.236966667  |
| RPS23        | -0.434933333 | -0.342366667 | -0.290733333 | 0.098333333  |
| WDR42A       | -0.313666667 | -0.4129      | -0.253366667 | 0.0693       |
| SNHG12       | -0.1324      | -0.1042      | -0.333033333 | 0.2675       |
| LOC389787    | -0.556166667 | -0.286166667 | -0.2719      | -0.0062      |
| CICE         | -0.203066667 | -0.384133333 | -0.1232      | 0.114966667  |
| LYN          | -0.103866667 | -0.159       | -0.265033333 | 0.2326       |
| RFWD3        | 0.014966667  | 0.044033333  | 0.0774       | 0.421966667  |
| CCDC46       | -0.314766667 | -0.340433333 | -0.345033333 | 0.069666667  |
| LOC388796    | 0.069433333  | -0.062866667 | -0.258233333 | 0.342966667  |
| CATSPER1     | -0.0846      | -0.0158      | -0.0996      | 0.349466667  |
| NCKIPSD      | -0.241766667 | -0.046533333 | -0.058733333 | 0.1958       |
| RUSC1        | -0.103466667 | -0.132433333 | -0.180066667 | 0.301566667  |
| FNDC3B       | 0.159433333  | -0.0371      | -0.381166667 | 0.2899       |
| LOC643438    | -0.049       | -0.1632      | -0.1882      | 0.330066667  |
| RAF1         | -0.106666667 | -0.2291      | -0.280866667 | 0.226766667  |
| NCOR2        | -0.186066667 | -0.328166667 | -0.591533333 | -0.0157      |
| SERINC3      | -0.383833333 | -0.358033333 | -0.373233333 | 0.028433333  |
| ELP4         | -0.2498      | -0.149466667 | -0.291666667 | 0.300066667  |
| HOXA4        | -0.141633333 | -0.184933333 | -0.1502      | 0.125966667  |
| CCDC12       | -0.109966667 | -0.194733333 | -0.256733333 | 0.195933333  |
| APLP1        | -0.428166667 | -0.2557      | -0.429966667 | -0.0027      |
| ZNF226       | -0.2445      | -0.252833333 | -0.099766667 | 0.181        |
| SDCCAG8      | -0.066633333 | -0.017866667 | -0.199633333 | 0.2325       |
| KLF5         | -0.057666667 | -0.159       | -0.2837      | 0.1705       |
| LOC100134189 | 0.218933333  | -0.1438      | -0.180266667 | 0.324966667  |

|                |              |              |              |              |
|----------------|--------------|--------------|--------------|--------------|
| LOC375295      | -0.230966667 | -0.161333333 | -0.446933333 | 0.097066667  |
| NCRNA00095     | -0.318366667 | -0.232366667 | -0.2197      | 0.137533333  |
| DOCK5          | 0.226766667  | 0.010033333  | -0.1009      | 0.402133333  |
| NKIRAS1        | -0.096533333 | -0.037033333 | -0.175566667 | 0.270333333  |
| CDKN2B         | -0.139033333 | -0.2893      | -0.061633333 | 0.2716       |
| LOC389141      | -0.267766667 | -0.296633333 | -0.380033333 | 0.0263       |
| FBXO2          | -0.253633333 | -0.205333333 | -0.208566667 | 0.1746       |
| TADA3          | -0.3398      | -0.326766667 | -0.211233333 | 0.092333333  |
| WDR73          | -0.153333333 | -0.157333333 | -0.269       | 0.2027       |
| KPNA3          | -0.001666667 | -0.229133333 | -0.080966667 | 0.2024       |
| HDDC3          | -0.512933333 | -0.1882      | -0.288533333 | -0.063433333 |
| ELF4           | 0.031166667  | -0.197433333 | -0.247433333 | 0.3322       |
| SETD8          | -0.075       | -0.0856      | -0.1231      | 0.2455       |
| TMEM189-UBE2V1 | 0.0166       | -0.124966667 | -0.232966667 | 0.2764       |
| LOC100134648   | 0.0026       | -0.171466667 | 0.035066667  | 0.228366667  |
| GTF2H2B        | -0.039566667 | -0.268333333 | -0.230033333 | 0.1723       |
| CHES1          | -0.574733333 | -0.476533333 | -0.340133333 | -0.094233333 |
| PXK            | -0.198833333 | -0.1561      | -0.189533333 | 0.190433333  |
| KIF3B          | -0.0682      | -0.357333333 | -0.164766667 | 0.182366667  |
| SNRPF          | 0.131233333  | 0.0105       | -0.163466667 | 0.452133333  |
| ARID3A         | -0.1059      | -0.104033333 | -0.128133333 | 0.271466667  |
| LOC100130746   | -0.243533333 | -0.248666667 | -0.3793      | 0.028633333  |
| MED27          | 0.094566667  | -0.147466667 | -0.2157      | 0.311066667  |
| POLR3B         | -0.1776      | -0.207766667 | -0.315966667 | 0.184166667  |
| CHCHD1         | -0.212266667 | -0.024966667 | -0.0238      | 0.2193       |
| ASCC3          | -0.251966667 | 0.0164       | -0.208133333 | 0.189866667  |
| HMG1           | -0.036266667 | -0.086933333 | -0.1801      | 0.235166667  |
| TGOLN2         | -0.0541      | -0.3032      | -0.276866667 | 0.194433333  |
| DLG1           | 0.019433333  | -0.253733333 | -0.244066667 | 0.273933333  |
| FAM110A        | 0.224133333  | 0.056066667  | 0.011966667  | 0.5246       |
| TRIM11         | -0.0302      | 0.0156       | -0.099333333 | 0.423666667  |
| UBTD1          | -0.070033333 | -0.146       | -0.165766667 | 0.4033       |
| MGC72104       | -0.621266667 | -0.401533333 | -0.235366667 | -0.1421      |
| BAT2L          | -0.2364      | -0.289       | -0.1907      | 0.207866667  |
| GAPDHL6        | -0.162766667 | -0.1032      | -0.168233333 | 0.171766667  |
| HNRPDL         | -0.221866667 | -0.430833333 | -0.3431      | 0.0125       |
| BRPF3          | -0.104233333 | -0.222166667 | -0.338633333 | 0.152333333  |
| ZNF426         | -0.385833333 | -0.175033333 | -0.3983      | -0.033233333 |
| ACTR1A         | -0.104633333 | -0.211333333 | -0.137133333 | 0.3287       |
| ZNF699         | -0.106333333 | -0.149066667 | -0.188133333 | 0.146233333  |
| B4GALT7        | -0.235966667 | -0.263566667 | -0.322166667 | 0.1192       |
| MRRF           | -0.187533333 | -0.3142      | -0.276766667 | 0.228933333  |
| C10orf32       | -0.366333333 | -0.4979      | -0.541166667 | 0.0321       |
| MYL6B          | -0.462133333 | -0.399066667 | -0.149633333 | -0.0508      |
| EIF2AK1        | -0.379366667 | -0.364833333 | -0.410366667 | -0.063433333 |
| DOM3Z          | -0.3716      | -0.327266667 | -0.2958      | 0.044766667  |
| CEBPD          | -0.486333333 | -0.5769      | -0.5109      | -0.128766667 |



|              |              |              |              |              |
|--------------|--------------|--------------|--------------|--------------|
| LOC729580    | -0.522133333 | -0.3297      | -0.249766667 | -0.032666667 |
| CUL2         | -0.178233333 | -0.067933333 | -0.0116      | 0.4384       |
| MAP2K5       | -0.524533333 | -0.359866667 | -0.238866667 | -0.1007      |
| TWSG1        | -0.240566667 | -0.1801      | -0.264766667 | 0.0823       |
| NEK11        | -0.2754      | -0.3063      | -0.419466667 | -0.0447      |
| SMAGP        | 0.141266667  | 0.234366667  | -0.0329      | 0.599866667  |
| SMA4         | -0.384833333 | -0.310333333 | -0.290133333 | -0.1922      |
| SETD2        | -0.102966667 | -0.206366667 | -0.274466667 | 0.085566667  |
| CDT1         | -0.1015      | 0.0197       | 0.135266667  | 0.315266667  |
| EXOC7        | -0.297033333 | -0.362733333 | -0.3137      | 0.0923       |
| NOL3         | -0.283766667 | -0.135933333 | -0.231166667 | 0.087433333  |
| CCT6P1       | 0.039033333  | -0.1677      | -0.185466667 | 0.104466667  |
| TP53BP1      | -0.260766667 | -0.280066667 | -0.297133333 | 0.088266667  |
| CYTH2        | -0.285833333 | -0.313833333 | -0.438666667 | 0.1245       |
| XYLT2        | -0.224566667 | -0.122733333 | -0.1732      | 0.1106       |
| STGC3        | -0.151966667 | -0.055233333 | -0.320766667 | 0.142366667  |
| RIN1         | -0.001766667 | -0.052166667 | -0.103133333 | 0.305766667  |
| PSMD4        | -0.211333333 | -0.263133333 | -0.340666667 | 0.117433333  |
| OGDH         | -0.2585      | -0.125266667 | -0.113566667 | 0.190133333  |
| LOC727865    | -0.2336      | -0.344933333 | -0.274166667 | 0.112733333  |
| ZNF131       | -0.2027      | -0.054466667 | -0.289633333 | 0.2391       |
| CTSC         | -0.257266667 | -0.2147      | 0.171733333  | 0.257        |
| TAP1         | -0.346966667 | -0.284066667 | -0.250033333 | 0.147966667  |
| LOC100131785 | -0.188033333 | -0.1778      | -0.315233333 | 0.1849       |
| HRIHFB2122   | -0.014366667 | -0.094933333 | -0.0317      | 0.3287       |
| FN1          | 0.2795       | -0.135       | -1.1622      | 0.126733333  |
| C7orf25      | -0.261666667 | -0.369766667 | -0.1952      | 0.107166667  |
| FAM55C       | -0.268633333 | -0.207666667 | -0.3164      | -0.0557      |
| ST6GALNAC6   | -0.205833333 | -0.247766667 | -0.3194      | 0.0635       |
| TATDN1       | -0.249166667 | -0.178266667 | -0.4521      | 0.1352       |
| EIF4G2       | 0.192        | -0.2133      | -0.172466667 | 0.408333333  |
| MKRN2        | -0.282633333 | -0.297433333 | -0.443633333 | 0.149833333  |
| AFF1         | -0.178       | -0.120233333 | -0.2132      | 0.1618       |
| PFDN5        | -0.405666667 | -0.212266667 | -0.375066667 | 0.083766667  |
| CCDC59       | -0.063366667 | -0.138733333 | -0.152466667 | 0.235266667  |
| TOR1A        | -0.191733333 | -0.132333333 | -0.307866667 | 0.177233333  |
| FAM44B       | -0.288633333 | -0.155333333 | -0.278233333 | 0.141566667  |
| PLEKHH3      | -0.339566667 | -0.387233333 | -0.591966667 | -0.078533333 |
| LOC441253    | -0.225733333 | -0.119733333 | -0.2384      | 0.153466667  |
| ZBTB17       | -0.221466667 | -0.098333333 | -0.115433333 | 0.2743       |
| PUS1         | -0.1318      | -0.075266667 | -0.1153      | 0.2869       |
| QRICH1       | -0.107266667 | -0.2279      | -0.194433333 | 0.204666667  |
| C17orf75     | -0.3133      | -0.269966667 | -0.369433333 | -0.049533333 |
| SH3GLB2      | -0.282666667 | -0.383766667 | -0.196466667 | 0.115866667  |
| C9orf78      | -0.203966667 | -0.3768      | -0.213466667 | 0.251733333  |
| MRPL46       | -0.1041      | -0.067266667 | -0.139533333 | 0.287433333  |
| CTGLF3       | -0.2043      | -0.2296      | -0.140733333 | 0.0564       |

|              |              |              |              |              |
|--------------|--------------|--------------|--------------|--------------|
| COX19        | -0.331566667 | -0.264866667 | -0.388833333 | -0.0076      |
| C7orf47      | -0.149866667 | -0.115333333 | -0.228       | 0.113333333  |
| LOC644100    | -0.082166667 | 0.000466667  | -0.032066667 | 0.167466667  |
| HPS6         | -0.2729      | -0.3034      | -0.208833333 | 0.071966667  |
| C17orf79     | -0.100766667 | -0.136266667 | -0.042233333 | 0.4292       |
| DNAJC24      | -0.124633333 | -0.211166667 | -0.227633333 | 0.194933333  |
| CRADD        | -0.195466667 | -0.187733333 | -0.361566667 | 0.148766667  |
| C5orf53      | -0.4543      | -0.368266667 | -0.329666667 | -0.101433333 |
| ABCC2        | -0.453433333 | -0.254       | -0.101233333 | 0.128666667  |
| C16orf93     | -0.315266667 | -0.2298      | -0.234266667 | 0.1978       |
| FAM38A       | 0.025033333  | -0.086933333 | -0.295566667 | 0.188633333  |
| MRPS27       | -0.3777      | -0.193066667 | -0.222166667 | 0.084033333  |
| PCCA         | -0.2934      | -0.3064      | -0.252766667 | 0.051633333  |
| RAB35        | 0.039266667  | -0.135433333 | -0.1062      | 0.302566667  |
| NT5DC2       | -0.0837      | 0.0008       | -0.209666667 | 0.173566667  |
| MYL6         | -7.00E-04    | -0.129866667 | -0.577666667 | 0.136066667  |
| TCEA3        | -0.242033333 | -0.106366667 | -0.16        | 0.1812       |
| HM13         | 0.019533333  | -0.1106      | -0.164066667 | 0.3412       |
| ARL2BP       | -0.136133333 | -0.267266667 | -0.217633333 | 0.213566667  |
| TOM1         | -0.5506      | -0.431766667 | -0.3177      | 0.0015       |
| RPL9         | -0.332966667 | -0.147366667 | -0.197866667 | 0.1355       |
| AP2M1        | -0.207933333 | -0.177333333 | -0.2466      | 0.208933333  |
| DMWD         | -0.097366667 | -0.3758      | -0.2914      | 0.1518       |
| ARPC3        | -0.141766667 | -0.390966667 | -0.231966667 | 0.1054       |
| PBX2         | -0.191633333 | -0.357133333 | -0.2473      | 0.060233333  |
| CLINT1       | -0.140766667 | -0.295733333 | -0.032166667 | 0.134266667  |
| LOC730278    | 0.021966667  | -0.1075      | -0.226566667 | 0.3139       |
| WDR36        | -0.049966667 | -0.1669      | -0.082466667 | 0.2479       |
| FAM120A      | -0.237466667 | -0.197166667 | -0.146466667 | 0.132966667  |
| SEC24D       | -0.0982      | -0.269766667 | -0.5803      | -0.077633333 |
| CDKL3        | -0.483566667 | -0.4427      | -0.2685      | -0.022466667 |
| TTC25        | -0.290933333 | -0.4052      | -0.4004      | 0.006866667  |
| CBLB         | -0.3754      | -0.432266667 | -0.3815      | -0.0402      |
| LOC100129203 | -0.2177      | -0.2909      | -0.038133333 | 0.323933333  |
| OLFML3       | -0.169666667 | -0.172333333 | -0.354566667 | 0.137866667  |
| PSME3        | -0.0427      | -0.084633333 | -0.1042      | 0.349233333  |
| SPOPL        | -0.069933333 | -0.194433333 | -0.1262      | 0.177        |
| HIST1H4E     | -0.335033333 | 0.067133333  | -0.253066667 | 0.185266667  |
| HSPC171      | -0.278233333 | -0.492933333 | -0.3111      | 0.042333333  |
| LOC644464    | -0.170366667 | -0.1653      | -0.1702      | 0.2055       |
| ALDOA        | -0.0694      | -0.127533333 | -0.298233333 | 0.051566667  |
| TINF2        | -0.2748      | -0.349533333 | -0.1791      | 0.111066667  |
| MKNK2        | -0.4426      | -0.204566667 | -0.385033333 | -0.093433333 |
| ZIK1         | -0.1917      | -0.1098      | -0.1185      | 0.2946       |
| ZRANB2       | -0.014733333 | -0.021933333 | -0.091433333 | 0.341233333  |
| TRAPPC2      | -0.393466667 | -0.3087      | -0.306133333 | -0.011933333 |
| ANKRA2       | -0.4025      | -0.3491      | -0.461766667 | -0.085766667 |

|              |              |              |              |              |
|--------------|--------------|--------------|--------------|--------------|
| CCNL1        | -0.264166667 | -0.1358      | -0.197466667 | 0.173766667  |
| LOC90586     | -0.4305      | -0.0815      | -0.150966667 | -0.024933333 |
| UBP1         | 0.0133       | -0.0835      | -0.075566667 | 0.344366667  |
| LOC729687    | -0.3428      | 0.0558       | -0.5945      | -0.130766667 |
| LOC646785    | -0.446       | -0.030166667 | -0.4322      | -0.120833333 |
| MYL5         | -0.3687      | -0.3393      | -0.4484      | -0.067233333 |
| SKIL         | 0.2045       | -0.087066667 | -0.178566667 | 0.370133333  |
| ZNF791       | -0.193766667 | -0.1695      | -0.243766667 | 0.132533333  |
| RFFL         | -0.0834      | -0.028766667 | -0.091966667 | 0.2298       |
| HSPH1        | 0.0058       | 0.017766667  | -0.2168      | 0.363866667  |
| RNU1G2       | -0.474666667 | -0.271533333 | -0.282233333 | -0.0742      |
| ASB7         | -0.1252      | -0.091133333 | -0.056433333 | 0.278366667  |
| DHX38        | -0.159733333 | -0.002133333 | -0.2832      | 0.1775       |
| PRRC1        | -0.093433333 | -0.234666667 | -0.583966667 | -0.060033333 |
| CHD2         | -0.261       | -0.318766667 | -0.460933333 | 0.022866667  |
| RPL32        | -0.312366667 | -0.1855      | -0.278       | 0.071966667  |
| MAPKAPK2     | 0.02         | -0.3289      | -0.174833333 | 0.312833333  |
| DNAJC21      | -0.373633333 | -0.194566667 | -0.2741      | 0.0325       |
| TRIP10       | -0.143066667 | -0.0331      | -0.2036      | 0.2269       |
| AHR          | -0.194033333 | -0.094833333 | -0.138266667 | 0.212733333  |
| EAF1         | -0.0791      | -0.1664      | -0.014133333 | 0.397866667  |
| ENG          | -0.202133333 | -0.202233333 | -0.333666667 | 0.1525       |
| ARHGEF2      | -0.292733333 | -0.340433333 | -0.347933333 | -0.0393      |
| HERPUD2      | -0.170433333 | -0.229166667 | -0.277333333 | 0.123166667  |
| ZDHHC16      | -0.130866667 | -0.0952      | -0.243633333 | 0.159466667  |
| TATDN3       | -0.476866667 | -0.3712      | -0.164166667 | 0.007033333  |
| LOC390578    | -0.646466667 | -0.006833333 | -0.580666667 | -0.3237      |
| OSTF1        | -0.0218      | 0.032        | 0.045866667  | 0.284033333  |
| CDKN2AIP     | -0.0845      | -0.097666667 | -0.1071      | 0.3103       |
| CAPZB        | -0.1955      | -0.050133333 | -0.3206      | 0.166066667  |
| SAP18        | -0.318933333 | -0.432133333 | -0.3989      | -0.0835      |
| WDR34        | 0.027766667  | -0.063333333 | -0.0806      | 0.289033333  |
| PNPLA8       | -0.477733333 | -0.469833333 | -0.3494      | -0.0425      |
| CLK4         | -0.176766667 | -0.288866667 | -0.115633333 | 0.307033333  |
| LOC642934    | -0.391666667 | -0.3303      | -0.2401      | 0.0784       |
| LOC100132356 | -0.1046      | -0.040933333 | -0.1899      | 0.329366667  |
| LASS2        | -0.071333333 | -0.125266667 | -0.238       | 0.2071       |
| LOC402057    | -0.539633333 | -0.1186      | -0.6961      | -0.277466667 |
| FLJ20125     | -0.1767      | -0.043866667 | -0.181966667 | 0.205433333  |
| CAMLG        | -0.432333333 | -0.380866667 | -0.285766667 | -0.0069      |
| LOC729466    | -0.3112      | -0.228166667 | -0.2696      | 0.148633333  |
| RBKS         | -0.398466667 | -0.3003      | -0.3434      | -0.058766667 |
| LOC641849    | -0.517866667 | -0.2374      | -0.288366667 | -0.089166667 |
| FCRLB        | -0.1678      | -0.0138      | -0.0513      | 0.251766667  |
| MAGED4B      | -0.1991      | -0.220633333 | -0.279033333 | 0.147433333  |
| KAT5         | -0.0046      | -0.0942      | -0.015333333 | 0.3547       |
| FAM122B      | -0.211133333 | -0.215466667 | -0.077833333 | 0.107433333  |

|              |              |              |              |              |
|--------------|--------------|--------------|--------------|--------------|
| RAXL1        | -0.419233333 | -0.169233333 | -0.2689      | -0.094866667 |
| P4HA1        | -0.0088      | -0.2302      | -0.181766667 | 0.155033333  |
| TGFB111      | 0.004633333  | -0.319866667 | -0.7306      | 0.151966667  |
| COASY        | -0.234666667 | -0.0926      | -0.0236      | 0.145866667  |
| TMUB1        | -0.336266667 | -0.198733333 | -0.070266667 | 0.139433333  |
| ZNF789       | -0.1558      | -0.331366667 | -0.1669      | 0.091333333  |
| LOC100132535 | -0.3538      | -0.328233333 | -0.342533333 | -0.075233333 |
| C17orf90     | -0.5079      | -0.460266667 | -0.228266667 | -0.089333333 |
| IL7          | -0.1225      | -0.052       | -0.171766667 | 0.196666667  |
| PSMG4        | -0.2712      | -0.0836      | -0.0442      | 0.048766667  |
| FAM65A       | -0.0221      | 0.031766667  | -0.082266667 | 0.4015       |
| S100A11      | 0.121433333  | -0.046633333 | -0.217933333 | 0.381666667  |
| GMPR2        | -0.3798      | -0.420866667 | -0.220133333 | -0.034166667 |
| RPS15        | 0.0833       | -0.0722      | -0.084733333 | 0.388966667  |
| LOC730235    | -0.285266667 | -0.3529      | -0.178833333 | 0.035466667  |
| C14orf143    | -0.173966667 | -0.180633333 | -0.358866667 | 0.075833333  |
| COMMD9       | -0.263933333 | -0.4384      | -0.188666667 | 0.1009       |
| C12orf47     | -0.424533333 | -0.369733333 | -0.226233333 | -0.0097      |
| HMOX1        | -0.405166667 | -0.311233333 | -0.5647      | -0.0022      |
| ZNF511       | 0.028033333  | 0.059733333  | -0.216       | 0.417033333  |
| CTNNAL1      | 0.0138       | 0.015866667  | -0.2446      | 0.1607       |
| CCDC66       | -0.2661      | -0.2557      | -0.302533333 | 0.050233333  |
| FAM116A      | -0.111233333 | -0.243833333 | -0.235033333 | 0.2284       |
| RTN4         | -0.0626      | -0.221733333 | -0.4458      | 0.082066667  |
| SLC35F3      | -0.0921      | -0.110466667 | -0.049633333 | 0.140766667  |
| SHOX2        | -0.123566667 | -0.1844      | -0.127733333 | 0.227433333  |
| YWHAG        | -0.0651      | -0.150733333 | -0.090733333 | 0.2136       |
| DNAJC2       | 0.036066667  | -0.052866667 | -0.092633333 | 0.1975       |
| CTR9         | -0.266333333 | -0.255833333 | -0.3077      | 0.112933333  |
| LOC729608    | -0.064866667 | -0.048566667 | -0.228433333 | 0.2545       |
| URG4         | -0.068233333 | -0.077066667 | -0.108233333 | 0.3057       |
| PCMTD1       | -0.504666667 | -0.441566667 | -0.416133333 | -0.167766667 |
| LOC642738    | -0.371966667 | -0.096466667 | -0.537966667 | -0.191133333 |
| MRPL43       | -0.224466667 | -0.3363      | -0.163733333 | 0.0782       |
| LOC100131707 | -0.362866667 | -0.302833333 | -0.2986      | -0.161833333 |
| C20orf111    | -0.2011      | -0.275333333 | -0.316       | 0.169033333  |
| LOC645086    | -0.168733333 | -0.156466667 | -0.435666667 | -0.003666667 |
| NOTCH2       | 0.1084       | -0.2034      | -0.1923      | 0.210666667  |
| CCDC16       | -0.267566667 | -0.218566667 | -0.2837      | 0.196433333  |
| LRRC20       | -0.3775      | -0.115533333 | -0.092333333 | 0.131533333  |
| RBM5         | -0.181133333 | -0.345133333 | -0.273166667 | 0.167733333  |
| PDDC1        | -0.2347      | -0.0941      | -0.120066667 | 0.234566667  |
| GABARAPL2    | -0.4305      | -0.142333333 | -0.2671      | 0.152766667  |
| LOC100129118 | -0.063333333 | -0.050133333 | -0.198833333 | 0.223466667  |
| LAMB1        | -0.2224      | -0.055366667 | -0.119633333 | 0.169433333  |
| TNFRSF1A     | 0.033766667  | -0.014966667 | -0.352133333 | 0.242233333  |
| MIR221       | 0.2364       | 0.058133333  | -0.085833333 | 0.416133333  |

|           |              |              |              |              |
|-----------|--------------|--------------|--------------|--------------|
| C5orf37   | 0.0013       | -0.0208      | -0.1281      | 0.2847       |
| PPWD1     | -0.036833333 | -0.027466667 | -0.1415      | 0.3304       |
| CYP20A1   | 0.058566667  | -0.0112      | -0.142333333 | 0.170266667  |
| MGC16703  | -0.266066667 | -0.323166667 | -0.366133333 | -0.072166667 |
| PDE4D     | -0.190533333 | -0.192666667 | -0.1172      | 0.091566667  |
| TTPAL     | -0.107566667 | -0.010366667 | 0.006166667  | 0.295066667  |
| C3orf23   | -0.1714      | -0.189766667 | -0.1525      | 0.2485       |
| CRSP9     | -0.187466667 | -0.1015      | -0.222533333 | 0.193666667  |
| RPSA      | -0.300366667 | -0.151266667 | -0.2437      | 0.059966667  |
| CUEDC2    | -0.490833333 | -0.382733333 | -0.300466667 | -0.1228      |
| DDX42     | -0.243233333 | -0.263233333 | -0.1664      | 0.092033333  |
| ACVR2A    | -0.320833333 | -0.404166667 | -0.203666667 | 0.086766667  |
| LOC648980 | -0.3388      | -0.297966667 | -0.2587      | 0.0468       |
| JUNB      | -0.172066667 | -0.285633333 | -0.153366667 | 0.308033333  |
| CAPNS1    | -0.2649      | -0.31        | -0.308166667 | 0.042466667  |
| AGPAT9    | 0.4094       | 0.457933333  | 0.024866667  | 0.5558       |
| LYSMD3    | -0.144533333 | -0.217833333 | -0.3403      | 0.014        |
| LOC643779 | -0.646866667 | -0.0665      | -0.652066667 | -0.262833333 |
| EIF3F     | -0.210033333 | -0.295866667 | -0.403966667 | 0.021266667  |
| STAU1     | -0.122166667 | 0.110433333  | -0.2083      | 0.1811       |
| SLC38A9   | -0.355866667 | -0.2813      | -0.286066667 | 0.0344       |
| EFHC1     | -0.287466667 | -0.1773      | -0.465933333 | -0.0091      |
| B3GALTL   | -0.284033333 | -0.188833333 | -0.250966667 | 0.067033333  |
| LOC646966 | -0.497266667 | -0.137666667 | -0.4526      | -0.173033333 |
| HOXC6     | -0.114466667 | -0.317166667 | -0.267566667 | 0.1344       |
| ASPH      | -0.0274      | -0.2082      | -0.227433333 | 0.222866667  |
| GPBP1     | -0.1792      | -0.180666667 | -0.154333333 | 0.120466667  |
| U2AF1     | 0.008266667  | -0.020866667 | -0.306066667 | 0.171266667  |
| TBCC      | -0.2256      | -0.154866667 | -0.264       | 0.204766667  |
| 2-Mar     | 0.499166667  | 0.5413       | 0.289333333  | 0.710366667  |
| CCDC6     | -0.254866667 | -0.280833333 | -0.349066667 | -0.039       |
| SNORD68   | -0.0468      | -0.0447      | -0.193966667 | 0.301933333  |
| LOC391578 | -0.156566667 | -0.214166667 | -0.238733333 | 0.1498       |
| BNIP1     | -0.193766667 | -0.0294      | -0.228       | 0.144533333  |
| EP400     | -0.257433333 | -0.287933333 | -0.241333333 | 0.0334       |
| LOC730996 | 0.076166667  | -0.0714      | -0.277733333 | 0.131666667  |
| ZBTB20    | -0.503666667 | -0.181133333 | -0.2109      | -0.089033333 |
| SRA1      | -0.0419      | 0.0158       | -0.212566667 | 0.3522       |
| SNX7      | -0.198033333 | -0.146366667 | -0.279466667 | 0.0392       |
| TOR1B     | -0.054433333 | -0.048266667 | -0.200766667 | 0.236266667  |
| FHL3      | 0.2716       | -0.324366667 | -0.315033333 | 0.374        |
| LOC641788 | -0.348433333 | -0.0348      | -0.099066667 | 0.0469       |
| LOC647597 | 0.145033333  | 0.0257       | -0.082966667 | 0.280733333  |
| LOC644250 | -0.344266667 | -0.033933333 | -0.328933333 | -0.101366667 |
| SLC45A3   | 0.3216       | 0.280833333  | 0.0622       | 0.535766667  |
| CYB5A     | -0.3853      | -0.228666667 | -0.1257      | 0.071233333  |
| N6AMT1    | -0.2291      | -0.1252      | -0.166166667 | 0.207533333  |

|              |              |              |              |              |
|--------------|--------------|--------------|--------------|--------------|
| AP3S2        | -0.2361      | -0.195966667 | -0.2303      | 0.135733333  |
| LOC647942    | -0.078133333 | -0.118       | -0.031366667 | 0.191766667  |
| BNIP3L       | -0.3129      | -0.220866667 | -0.3181      | -0.119233333 |
| PRPF3        | 0.077833333  | -0.030133333 | -0.1599      | 0.281233333  |
| SNORD32A     | -0.120233333 | -0.178333333 | -0.086933333 | 0.204333333  |
| FAM21D       | -0.305933333 | -0.203066667 | -0.34        | 0.031966667  |
| LOC100132086 | -0.0569      | -0.1602      | -0.0746      | 0.2727       |
| C7orf50      | -0.1586      | -0.129066667 | -0.234033333 | 0.143766667  |
| LOC644869    | -0.191333333 | -0.161266667 | -0.149966667 | 0.077733333  |
| IPO11        | -0.167933333 | -0.1448      | -0.292633333 | 0.123666667  |
| CLK3         | -0.062066667 | -0.155766667 | 0.004466667  | 0.184666667  |
| EIF4H        | -0.028666667 | -0.1779      | -0.162133333 | 0.2174       |
| LRRFIP2      | 0.0225       | -0.0574      | -0.221066667 | 0.204766667  |
| C6orf1       | -0.433633333 | -0.2043      | -0.071166667 | 0.1699       |
| HSPB8        | -0.0638      | -0.2705      | -0.306066667 | 0.232533333  |
| MAPK9        | -0.239066667 | -0.117466667 | -0.192066667 | 0.0481       |
| LOC649604    | -0.043433333 | -0.085133333 | -0.322933333 | 0.1278       |
| HOXB5        | -0.277766667 | -0.3636      | -0.1153      | 0.074033333  |
| TAP2         | 0.0456       | -0.076933333 | -0.069066667 | 0.3788       |
| LOC285074    | -0.379466667 | -0.4459      | -0.402166667 | -0.049166667 |
| IRF7         | -0.224666667 | -0.2997      | -0.457533333 | 0.032033333  |
| ZNHIT1       | -0.2224      | -0.196566667 | -0.3512      | 0.163066667  |
| LOC653631    | 0.016533333  | -0.238333333 | -0.1271      | 0.231433333  |
| NDUFS4       | -0.191366667 | -0.203033333 | -0.2251      | 0.150766667  |
| LOC728416    | -0.103466667 | -0.150733333 | -0.1159      | 0.1974       |
| RPL26L1      | -0.090133333 | -0.269133333 | -0.0357      | 0.284        |
| PCID2        | -0.089833333 | -0.0548      | -0.101633333 | 0.227866667  |
| LEO1         | 0.041        | -0.091566667 | -0.143566667 | 0.245966667  |
| NRBF2        | -0.315366667 | -0.270666667 | -0.302833333 | -0.0314      |
| C11orf74     | -0.350166667 | -0.359666667 | -0.382466667 | -0.116133333 |
| C9orf119     | -0.237966667 | -0.163333333 | -0.486466667 | 0.078566667  |
| GUK1         | -0.335166667 | -0.296933333 | -0.2333      | 0.100666667  |
| DDX60        | -0.289033333 | -0.2588      | -0.298133333 | 0.016466667  |
| LOC653080    | -0.4782      | -0.2618      | -0.146433333 | -0.153133333 |
| PDCD6IP      | -0.393033333 | -0.434566667 | -0.0614      | 0.009633333  |
| ZRANB1       | -0.1961      | -0.365533333 | -0.2833      | 0.011966667  |
| PMS2L4       | -0.404833333 | -0.342233333 | -0.1538      | -0.024933333 |
| LOC390466    | -0.038066667 | -0.239633333 | -0.1156      | 0.184733333  |
| KIAA0907     | -0.009733333 | -0.215633333 | -0.300233333 | 0.172333333  |
| LOC728755    | -0.429366667 | -0.421766667 | -0.317933333 | -0.264066667 |
| SLC25A46     | -0.092966667 | -0.1773      | -0.215833333 | 0.1202       |
| SNX13        | -0.1594      | -0.2389      | -0.241866667 | 0.0993       |
| FLAD1        | -0.290333333 | -0.227933333 | -0.148333333 | 0.1173       |
| LOC100132992 | -0.151966667 | -0.149966667 | -0.269333333 | 0.0567       |
| LOC728324    | 0.0386       | -0.251466667 | -0.153033333 | 0.1888       |
| SPA17        | -0.145166667 | -0.0721      | -0.234033333 | 0.141666667  |
| NDFIP2       | -0.148566667 | -0.124       | -0.1166      | 0.202733333  |

|           |              |              |              |              |
|-----------|--------------|--------------|--------------|--------------|
| EIF1      | -0.0735      | -0.260366667 | -0.339466667 | 0.204666667  |
| OSBPL2    | -0.4036      | -0.4226      | -0.345533333 | -0.166433333 |
| LOC644907 | -0.311333333 | -0.244966667 | -0.219633333 | 0.0255       |
| LOC729666 | -0.3927      | 0.095366667  | -0.548766667 | -0.3609      |
| SNORA7B   | -0.231066667 | -0.1778      | -0.1937      | 0.053266667  |
| VPS26     | -0.3492      | -0.118533333 | -0.168733333 | 0.033933333  |
| SRP19     | 0.055633333  | 0.038033333  | -0.3178      | 0.227933333  |
| CD58      | 0.105666667  | -0.145633333 | -0.399933333 | 0.222533333  |
| RNF217    | 0.081033333  | -0.135966667 | -0.271433333 | 0.3001       |
| ELK3      | 0.0678       | 0.098866667  | -0.199533333 | 0.2521       |
| GHITM     | -0.265766667 | -0.363366667 | -0.266566667 | 0.062266667  |
| C9orf116  | -0.426466667 | -0.322533333 | -0.364533333 | -0.001333333 |
| LSM5      | -0.1271      | 0.019833333  | -0.1485      | 0.0853       |
| TANC2     | -0.1896      | -0.088433333 | -0.102066667 | 0.098066667  |
| METTL11A  | -0.099566667 | 0.0273       | -0.0512      | 0.298566667  |
| RRP12     | -0.0373      | -0.014833333 | -0.0626      | 0.3823       |
| C7orf11   | -0.1986      | -0.014266667 | -0.272566667 | 0.073766667  |
| ARHGAP18  | 0.1406       | 0.255633333  | 0.1824       | 0.535266667  |
| ZNF12     | -0.374066667 | -0.192166667 | -0.2299      | 0.103533333  |
| CENPBD1   | -0.1256      | -0.235633333 | -0.225533333 | 0.188266667  |
| SELS      | 0.034566667  | -0.178833333 | -0.3088      | 0.210666667  |
| RECK      | -0.4742      | -0.3541      | -0.219       | 0.027766667  |
| PAFAH1B1  | -0.217       | -0.3793      | -0.2706      | -0.0765      |
| SIAH1     | -0.447633333 | -0.449133333 | -0.420833333 | -0.100666667 |
| FKBP10    | -0.2978      | -0.231566667 | -0.319333333 | 0.062233333  |
| KCTD6     | -0.048833333 | 0.0098       | -0.170933333 | 0.2547       |
| TMOD3     | -0.071366667 | -0.128033333 | -0.057866667 | 0.126333333  |
| FSTL1     | -0.4431      | -0.3365      | 0.156166667  | 0.061066667  |
| IRX3      | 0.072433333  | -0.188866667 | -0.336433333 | 0.229933333  |
| UEVLD     | -0.025433333 | -0.055033333 | -0.170766667 | 0.204066667  |
| MNAT1     | -0.002966667 | 0.0694       | -0.223733333 | 0.2732       |
| CSNK2A1   | -0.0717      | 0.0007       | -0.0404      | 0.152166667  |
| PHF1      | -0.231466667 | -0.359933333 | -0.347433333 | 0.043066667  |
| UQCC      | -0.064066667 | -0.192066667 | -0.1627      | 0.192833333  |
| CWF19L1   | -0.106366667 | -0.1149      | -0.089666667 | 0.2773       |
| TXNDC15   | -0.305833333 | -0.297066667 | -0.327466667 | 0.0255       |
| CIRH1A    | 0.011366667  | -0.121266667 | 0.025866667  | 0.4105       |
| H2AFY     | -0.0731      | -0.0151      | -0.192966667 | 0.277166667  |
| PSMB7     | -0.323133333 | -0.164666667 | -0.130033333 | 0.132866667  |
| HCCS      | 0.039066667  | -0.099       | -0.227333333 | 0.3108       |
| SMN2      | 0.020133333  | -0.082433333 | -0.0263      | 0.2152       |
| UROS      | -0.379266667 | -0.384833333 | -0.233866667 | -0.065633333 |
| CPD       | -0.422033333 | -0.343833333 | -0.253966667 | -0.045233333 |
| LIN7B     | -0.3408      | -0.2463      | -0.324066667 | 0.0396       |
| GSK3B     | 0.016666667  | -0.036933333 | 0.029333333  | 0.322        |
| LOC649821 | -0.293666667 | -0.248433333 | 0.156633333  | 0.3095       |
| ZNF577    | -0.250966667 | 0.0108       | -0.042233333 | 0.048466667  |

|              |              |              |              |              |
|--------------|--------------|--------------|--------------|--------------|
| ATXN2        | -0.0878      | -0.0406      | -0.1341      | 0.143633333  |
| OGFOD1       | 0.0643       | -0.021666667 | -0.2388      | 0.255566667  |
| CYBRD1       | -0.4759      | -0.411666667 | -0.1325      | -0.0873      |
| SH3BP5L      | -0.275733333 | -0.1735      | -0.386333333 | 0.047266667  |
| FBXW5        | -0.326666667 | -0.266333333 | -0.208766667 | 0.137633333  |
| LOC441743    | -0.0913      | -0.257466667 | -0.273066667 | 0.1724       |
| ACY1         | -0.4234      | -0.328466667 | -0.077966667 | -0.054633333 |
| CTTN         | -0.1143      | -0.0871      | 0.006066667  | 0.266166667  |
| ITM2B        | -0.410633333 | -0.3974      | -0.2975      | -0.024733333 |
| NAT6         | -0.216266667 | -0.334666667 | -0.270733333 | 0.1038       |
| UBAP1        | -0.210733333 | -0.270966667 | -0.277266667 | 0.156133333  |
| ZDHHC17      | -0.169266667 | -0.199933333 | -0.196733333 | 0.107033333  |
| SRGAP1       | -0.068833333 | 0.0953       | -0.0479      | 0.249066667  |
| CHST12       | -0.136       | -0.0516      | -0.105166667 | 0.088733333  |
| ASB1         | -0.157733333 | -0.2179      | -0.056233333 | 0.093833333  |
| TMEM30A      | -0.198033333 | -0.006733333 | -0.1745      | 0.030933333  |
| RAP1A        | 0.018266667  | -0.168133333 | -0.165533333 | 0.2489       |
| STK17B       | 0.325633333  | 0.127033333  | 0.136466667  | 0.5124       |
| LOC100131526 | -0.5195      | -0.0882      | -0.530066667 | -0.120766667 |
| SLC2A1       | 0.6719       | 0.170833333  | -0.181366667 | 0.492766667  |
| POFUT2       | -0.239066667 | -0.224433333 | -0.3887      | 0.003633333  |
| BTF3         | -0.207766667 | -0.153033333 | -0.1447      | 0.131666667  |
| C20orf55     | 0.251733333  | -0.027333333 | -0.0601      | 0.4294       |
| PROCR        | -0.032066667 | -0.164466667 | -0.2451      | 0.225066667  |
| VASP         | 0.2095       | -0.034933333 | -0.192433333 | 0.431966667  |
| PSMD7        | -0.177       | -0.008433333 | -0.203366667 | 0.063366667  |
| TRA2A        | 0.207533333  | -0.126166667 | -0.309966667 | 0.3208       |
| SNORD14A     | -0.011733333 | -0.204566667 | -0.0584      | 0.258566667  |
| SLC30A5      | -0.142333333 | -0.028066667 | -0.2582      | -0.063633333 |
| TBPL1        | -0.035066667 | -0.012966667 | -0.147166667 | 0.2809       |
| PTPLA        | -0.437333333 | -0.3174      | -0.2487      | -0.000966667 |
| ANXA6        | -0.021733333 | 0.015466667  | -0.135233333 | 0.3587       |
| TM2D3        | -0.5311      | -0.3735      | -0.222866667 | -0.035       |
| IL18R1       | -0.128933333 | -0.1281      | -0.086266667 | 0.1591       |
| SMNDC1       | 0.107566667  | -0.157733333 | -0.153       | 0.252166667  |
| BEX5         | -0.157433333 | -0.270966667 | -0.4168      | 0.063666667  |
| RAE1         | 0.054566667  | -0.332066667 | -0.142466667 | 0.206266667  |
| ISCA1L       | -0.196333333 | -0.032166667 | 0.020233333  | 0.3579       |
| DDX17        | -0.332433333 | -0.239066667 | -0.253433333 | -0.010633333 |
| SNORA14B     | -0.011433333 | -0.0382      | -0.141266667 | 0.324666667  |
| SAP30BP      | -0.185933333 | -0.213466667 | -0.055966667 | 0.182966667  |
| STAG3L2      | -0.1008      | -0.111933333 | -0.0753      | 0.114333333  |
| LOC441131    | -0.247266667 | -0.236533333 | -0.190233333 | 0.156666667  |
| LOC652291    | -0.244233333 | -0.2277      | -0.327166667 | 0.0418       |
| RNF146       | -0.2761      | -0.4054      | -0.402466667 | 0.0053       |
| ADAT1        | -0.454666667 | -0.043566667 | -0.056166667 | 0.1414       |
| COQ9         | -0.180466667 | -0.163766667 | -0.248066667 | 0.159266667  |



|              |              |              |              |              |
|--------------|--------------|--------------|--------------|--------------|
| ANXA1        | 0.020466667  | 0.007966667  | -0.556233333 | 0.178166667  |
| ITGAV        | -0.188733333 | -0.477566667 | -0.2575      | 0.097966667  |
| AGAP8        | -0.253566667 | -0.243366667 | -0.226733333 | 0.055066667  |
| TAF1A        | 0.119166667  | 0.011433333  | -0.043766667 | 0.467366667  |
| ZNF594       | -0.201333333 | -0.194733333 | -0.404566667 | 0.164233333  |
| SUPV3L1      | -0.0756      | -0.1005      | -0.104233333 | 0.262866667  |
| C9orf150     | -0.555766667 | -0.608866667 | -0.547433333 | -0.286266667 |
| GALK2        | -0.061       | -0.086133333 | -0.0213      | 0.269666667  |
| PLEKHN1      | 0.014933333  | -0.192166667 | -0.082233333 | 0.148666667  |
| RPLP1        | -0.598666667 | -0.0867      | -0.4829      | -0.161433333 |
| DBN1         | -0.129866667 | -0.194066667 | -0.2619      | 0.018333333  |
| LRRC59       | 0.074066667  | 0.038566667  | -0.184966667 | 0.254        |
| CENPH        | -0.042933333 | -0.046966667 | -0.043633333 | 0.182466667  |
| LOC653737    | -0.348       | -0.261433333 | -0.204166667 | 0.003733333  |
| SLC39A8      | -0.165766667 | -0.032       | 0.1901       | 0.237666667  |
| TWF1         | -0.113066667 | -0.096833333 | -0.157766667 | 0.053966667  |
| LOC729208    | -0.273533333 | -0.274466667 | -0.316833333 | -0.0706      |
| AKAP13       | -0.191433333 | -0.1878      | -0.072633333 | 0.046333333  |
| ELL          | 0.0435       | -0.031933333 | -0.094433333 | 0.347333333  |
| LOC100131336 | 0.013133333  | -0.013566667 | -0.1885      | 0.273833333  |
| ERGIC1       | -0.1464      | -0.4327      | 0.071433333  | 0.1113       |
| LOC283412    | -0.326133333 | -0.350566667 | -0.120566667 | 0.0494       |
| CASP8        | -0.027866667 | -0.069333333 | -0.040366667 | 0.129866667  |
| LOC643980    | -0.405833333 | -0.278433333 | -0.2398      | -0.0184      |
| EXOSC8       | 0.030933333  | -0.244066667 | -0.327366667 | 0.0288       |
| MRFAP1L1     | -0.084333333 | -0.2917      | -0.209933333 | 0.1468       |
| TRIM68       | -0.258333333 | -0.357366667 | -0.430533333 | -0.0253      |
| RPL36        | -0.079       | -0.1505      | -0.033533333 | 0.235733333  |
| CTSO         | -0.213833333 | -0.522833333 | -0.3228      | 0.053366667  |
| LOC100132658 | -0.327666667 | -0.2044      | -0.274566667 | 0.0682       |
| LOC388654    | -0.305566667 | -0.2329      | -0.233933333 | 0.0381       |
| DNAJC30      | -0.3062      | -0.202866667 | -0.301433333 | 0.0886       |
| LOC400061    | -0.353766667 | -0.1727      | -0.3395      | 0.099466667  |
| UGT2B11      | -0.634266667 | -0.495466667 | -0.385066667 | -0.187133333 |
| MAT2B        | -0.009133333 | -0.232633333 | -0.088666667 | 0.268533333  |
| MRP63        | -0.263633333 | -0.016733333 | -0.1933      | 0.019866667  |
| RUSC2        | 0.065866667  | -0.0411      | -0.073       | 0.351066667  |
| ECHS1        | -0.197       | -0.112466667 | -0.213566667 | 0.184933333  |
| NUDT6        | -0.098466667 | -0.130966667 | -0.146866667 | 0.166066667  |
| MIB1         | -0.160466667 | -0.353233333 | -0.2051      | 0.065233333  |
| NIPBL        | -0.3085      | -0.1963      | -0.208666667 | -0.113266667 |
| LOC100132740 | -0.154566667 | -0.083833333 | -0.0964      | 0.047333333  |
| LOC221710    | 0.1372       | 0.0712       | -0.054266667 | 0.4155       |
| ITGAE        | -0.137566667 | -0.021233333 | -0.159366667 | 0.1874       |
| HMGCL        | -0.455133333 | -0.319633333 | -0.394866667 | -0.141966667 |
| FAM173B      | -0.201733333 | -0.072566667 | 0.0141       | 0.141333333  |
| SGSH         | -0.441233333 | -0.401633333 | -0.026666667 | -0.036533333 |

|              |              |              |              |              |
|--------------|--------------|--------------|--------------|--------------|
| OVGP1        | -0.2009      | -0.140766667 | -0.0882      | 0.157        |
| SKAP2        | -0.435633333 | -0.3597      | -0.1594      | -0.095733333 |
| RNU1F1       | -0.3444      | -0.276533333 | -0.320933333 | -0.12        |
| LOC100132547 | -0.575033333 | -0.1527      | -0.3786      | -0.025866667 |
| HBG1         | -0.1493      | -0.154866667 | -0.117633333 | 0.1874       |
| LOC441089    | 0.0717       | -0.020033333 | -0.249766667 | 0.221666667  |
| COPB1        | -0.111133333 | -0.218666667 | -0.4425      | 0.095966667  |
| LOC646942    | -0.091666667 | -0.264033333 | -0.067166667 | 0.1437       |
| CHN1         | -0.096933333 | -0.150266667 | -0.144066667 | 0.1607       |
| ZNF302       | -0.415233333 | -0.582733333 | -0.408833333 | -0.025133333 |
| MSX1         | 0.1423       | -0.317533333 | -0.310233333 | 0.306733333  |
| DGKG         | -0.2816      | -0.088966667 | -0.051133333 | 0.207166667  |
| PRO1853      | -0.310266667 | -0.0453      | -0.074466667 | 0.0286       |
| AKIRIN2      | -0.050933333 | -0.1482      | -0.3759      | 0.157833333  |
| SAMD11       | -0.2825      | -0.223766667 | -0.2543      | -0.266433333 |
| KIAA1033     | -0.268833333 | -0.198033333 | -0.3094      | -0.043133333 |
| C12orf23     | -0.257633333 | -0.1195      | -0.436566667 | -0.1514      |
| GPT2         | -0.2287      | -0.186833333 | -0.368766667 | -0.0996      |
| EXOSC2       | 0.037933333  | 0.197133333  | 0.0266       | 0.394333333  |
| TACC3        | 0.0417       | 0.085966667  | -0.038233333 | 0.379266667  |
| RHOB         | 0.399666667  | 0.026833333  | 0.032433333  | 0.582566667  |
| TWIST2       | -0.144166667 | -0.1387      | -0.047033333 | 0.247433333  |
| KIAA1324     | 0.2076       | -0.248266667 | -0.708466667 | 0.164733333  |
| PPIL1        | 0.045433333  | 0.028966667  | 0.025433333  | 0.404266667  |
| CBWD5        | -0.174466667 | -0.204233333 | -0.143333333 | 0.152266667  |
| SNHG9        | -0.060533333 | -0.2712      | -0.1354      | 0.155466667  |
| PAK1IP1      | -0.059633333 | 0.102633333  | -0.152066667 | 0.2512       |
| ZFP36L1      | -0.414733333 | -0.238133333 | -0.104966667 | 0.274166667  |
| RNU1-5       | -0.339166667 | -0.2261      | -0.305833333 | -0.0822      |
| ADAM9        | 0.018533333  | -0.3025      | -0.1557      | 0.1622       |
| CKLF         | 0.0804       | -0.004033333 | 0.008633333  | 0.3504       |
| SUMF1        | -0.3799      | -0.3799      | -0.194533333 | -0.020866667 |
| AP4E1        | 0.0173       | 0.050166667  | -0.072633333 | 0.309433333  |
| HHEX         | 0.631233333  | 0.2545       | -0.224966667 | 0.609066667  |
| LRP11        | -0.4235      | -0.242466667 | -0.056133333 | -0.042933333 |
| TMEM101      | -0.408       | -0.352866667 | -0.135566667 | -0.029333333 |
| MED13L       | -0.137933333 | -0.238466667 | -0.270366667 | 0.097466667  |
| TNIP2        | -0.146666667 | -0.067733333 | -0.180766667 | 0.209666667  |
| CORO1C       | 0.11         | 0.143966667  | 0.095133333  | 0.4069       |
| YAF2         | -0.239533333 | -0.360466667 | -0.131133333 | -0.011866667 |
| ATP6V0D1     | -0.313233333 | -0.283266667 | -0.208733333 | 0.092066667  |
| DDX47        | 0.286033333  | -0.188233333 | -0.146766667 | 0.296066667  |
| DPP8         | -0.115333333 | -0.193833333 | -0.196733333 | 0.1219       |
| LOC727821    | -0.282033333 | -0.302733333 | -0.2075      | 0.0418       |
| PFN2         | -0.050133333 | -0.373066667 | -0.439066667 | 0.0308       |
| WDR45        | -0.3707      | -0.314666667 | -0.2594      | 0.108333333  |
| RPUSD2       | -0.0344      | -0.047733333 | -0.083166667 | 0.318933333  |

|              |              |              |              |              |
|--------------|--------------|--------------|--------------|--------------|
| NBPF15       | -0.1438      | -0.1079      | 0.000866667  | 0.107966667  |
| AARSD1       | -0.1517      | -0.122666667 | -0.1762      | 0.161733333  |
| CGGBP1       | 0.276466667  | -0.257066667 | -0.374833333 | 0.275        |
| EIF2A        | -0.209266667 | -0.294933333 | -0.232966667 | 0.003833333  |
| CNOT6        | -0.082833333 | -0.190933333 | 0.024        | 0.208        |
| CISD1        | -0.1474      | -0.018833333 | -0.1826      | 0.198633333  |
| TXNL4B       | -0.196966667 | -0.152166667 | -0.231433333 | 0.188666667  |
| LOC402694    | -0.258133333 | -0.0951      | -0.177866667 | 0.116466667  |
| FKBP15       | -0.2651      | -0.033733333 | -0.0823      | 0.297133333  |
| JMJD6        | 0.069666667  | 0.065533333  | -0.0541      | 0.443466667  |
| FAM131A      | -0.070333333 | -0.2888      | -0.282333333 | 0.104166667  |
| LOC728060    | -0.392766667 | -0.259933333 | -0.301766667 | -0.152033333 |
| WDR48        | -0.268766667 | -0.434633333 | -0.368666667 | -0.074933333 |
| ABCC3        | -0.1778      | -0.2349      | -0.1184      | 0.071833333  |
| LOC645157    | -0.4068      | -0.0952      | -0.241833333 | -0.006266667 |
| TUG1         | -0.429866667 | -0.2545      | -0.357933333 | -0.056766667 |
| RAB11B       | -0.072133333 | -0.056633333 | -0.2128      | 0.074033333  |
| ANAPC10      | 0.069366667  | 0.019266667  | -0.161933333 | 0.332333333  |
| NOTCH2NL     | -0.087066667 | -0.127766667 | -0.205233333 | 0.068266667  |
| FREQ         | -0.1173      | -0.305733333 | -0.069966667 | 0.149        |
| SAP30L       | -0.0511      | -0.205366667 | -0.321333333 | 0.274366667  |
| PPP6C        | 0.019866667  | -0.0994      | -0.101466667 | 0.314066667  |
| SYT14        | -0.2358      | -0.2618      | -0.314866667 | 0.0393       |
| RUFY2        | -0.1507      | -0.101133333 | -0.09        | 0.094633333  |
| ASB6         | -0.178433333 | -0.2402      | -0.227833333 | 0.0752       |
| CBARA1       | -0.244833333 | -0.316066667 | -0.251933333 | -0.0269      |
| LHFP         | 0.1525       | -0.053933333 | -0.249566667 | 0.206833333  |
| HARS         | 0.051033333  | -0.067966667 | -0.0822      | 0.286        |
| LOC728457    | -0.377166667 | -0.362966667 | -0.174166667 | 0.033366667  |
| LOC128192    | -0.072033333 | -0.058633333 | -0.024533333 | 0.2155       |
| LOC100133277 | -0.520633333 | -0.0701      | -0.569766667 | -0.236933333 |
| LOC400890    | 0.100266667  | 0.020666667  | -0.076266667 | 0.364        |
| RBM34        | -0.156333333 | -0.211966667 | -0.3335      | 0.062666667  |
| LOC644979    | 0.039033333  | -0.246033333 | -0.123733333 | 0.3064       |
| MSTO1        | -0.178966667 | -0.139733333 | -0.292366667 | 0.147866667  |
| MGC87895     | -0.427433333 | -0.0483      | -0.4694      | -0.0689      |
| MFSD10       | -0.029366667 | -0.0986      | -0.090266667 | 0.2059       |
| RING1        | -0.3446      | -0.354266667 | -0.2705      | 0.011733333  |
| LOC727768    | -0.346       | -0.263733333 | -0.2112      | 0.0685       |
| ARNTL        | -0.180866667 | -0.1017      | -0.096233333 | 0.076233333  |
| LOC645676    | -0.0704      | -0.034266667 | -0.155166667 | 0.280866667  |
| GPRIN1       | -0.150666667 | -0.134866667 | -0.1488      | 0.1609       |
| HYAL3        | -0.158266667 | -0.110733333 | -0.2629      | 0.176333333  |
| ZNF75D       | -0.209533333 | -0.3927      | -0.0886      | 0.215766667  |
| ZNF83        | -0.302166667 | -0.1914      | -0.314533333 | -0.0518      |
| ZNF786       | -0.216166667 | -0.2154      | 0.0605       | 0.044066667  |
| SLC16A6      | -0.2664      | -0.0219      | 0.442433333  | 0.370233333  |

|              |              |              |              |              |
|--------------|--------------|--------------|--------------|--------------|
| LOC729505    | -0.0568      | 0.001633333  | -0.214333333 | 0.203        |
| GLO1         | 0.024733333  | -0.170733333 | -0.072633333 | 0.206333333  |
| LOC647037    | -0.069       | -0.227833333 | -0.239033333 | 0.1189       |
| MNX1         | -0.060533333 | 0.016133333  | -0.075633333 | 0.2938       |
| GTF2IRD1     | -0.196366667 | -0.1785      | -0.266333333 | 0.1675       |
| SSR3         | 0.039733333  | -0.0401      | -0.092333333 | 0.253433333  |
| PMPCA        | -0.141733333 | 0.0173       | -0.0768      | 0.257366667  |
| GLUD1        | -0.0749      | -0.177566667 | -0.148866667 | 0.1374       |
| C12orf52     | -0.067633333 | -0.0975      | -0.157533333 | 0.202466667  |
| LOC100128098 | -0.4337      | 0.078533333  | -0.118033333 | -0.0611      |
| GOLGA2       | -0.0421      | -0.3364      | -0.381366667 | 0.059        |
| ARHGAP30     | -0.027766667 | -0.090833333 | -0.250233333 | 0.350833333  |
| PFTK1        | -0.036433333 | 0.193166667  | -0.165633333 | 0.3355       |
| ABLIM3       | -0.186766667 | -0.039466667 | -0.6084      | 0.063433333  |
| LOC389293    | -0.131866667 | 0.021133333  | -0.053966667 | 0.238233333  |
| IDH2         | -0.3267      | -0.266566667 | -0.1244      | 0.043866667  |
| SLC20A1      | 0.3349       | 0.364433333  | 0.323433333  | 0.635566667  |
| 6-Sep        | 0.0035       | -0.193733333 | -0.212933333 | 0.142966667  |
| LOC100129436 | -0.2327      | -0.183       | -0.2209      | 0.123266667  |
| CD2AP        | -0.090533333 | -0.284333333 | -0.252366667 | 0.093666667  |
| DDX50        | -0.243133333 | -0.126666667 | -0.203933333 | -0.021133333 |
| C1orf122     | -0.309633333 | -0.217266667 | -0.367966667 | -0.056466667 |
| ARF1         | 0.1521       | -0.103933333 | -0.190566667 | 0.222066667  |
| FBXO4        | -0.3003      | -0.3041      | -0.1803      | 0.073866667  |
| IDS          | -0.0495      | -0.260866667 | -0.444733333 | 0.0119       |
| DNAJB1       | 0.3725       | 0.103966667  | -0.0435      | 0.5218       |
| NMI          | -0.189433333 | -0.2555      | 5.00E-04     | 0.2098       |
| CLIC1        | 0.277466667  | 0.058733333  | -0.198366667 | 0.3716       |
| DNTTIP2      | -0.0831      | 0.092533333  | -0.073166667 | 0.191766667  |
| SPG20        | -0.234       | -0.226566667 | -0.195333333 | 0.075066667  |
| TXNL1        | -0.149866667 | -0.092533333 | -0.203       | 0.131766667  |
| LOC100131187 | -0.2225      | -0.4893      | -0.1721      | 0.013766667  |
| IQSEC2       | -0.185666667 | -0.203833333 | -0.169833333 | 0.152133333  |
| TSSC4        | -0.0236      | -0.122066667 | -0.3955      | 0.042966667  |
| CCDC136      | -0.350833333 | -0.252966667 | -0.182533333 | -0.021133333 |
| RBM22        | 0.0226       | -0.135066667 | -0.191633333 | 0.249366667  |
| DYNC1LI1     | -0.190266667 | -0.072666667 | -0.2361      | 0.164933333  |
| ZBTB38       | -0.1254      | -0.053766667 | -0.116866667 | 0.157033333  |
| LOC148413    | -0.500466667 | -0.605933333 | -0.494       | -0.243766667 |
| EGFLAM       | -0.155333333 | -0.066466667 | -0.178666667 | 0.1433       |
| ACP1         | -0.0914      | -0.312333333 | -0.319933333 | 0.073966667  |
| APOL3        | -0.0282      | -0.0984      | -0.120233333 | 0.303966667  |
| C10orf26     | -0.2726      | -0.2432      | -0.2758      | 0.000233333  |
| CAPS2        | -0.190933333 | -0.287266667 | -0.117       | 0.062366667  |
| RP9          | -0.073033333 | -0.056366667 | -0.1857      | 0.295566667  |
| DAPP1        | -0.231233333 | -0.100766667 | -0.221633333 | -0.072866667 |
| GRINL1A      | -0.1189      | -0.1901      | -0.131566667 | 0.113133333  |

|              |              |              |              |              |
|--------------|--------------|--------------|--------------|--------------|
| LOC100128163 | -0.019       | -0.0278      | -0.016033333 | 0.3215       |
| WDR51B       | 0.403166667  | -0.211066667 | -0.256366667 | 0.4126       |
| CHD9         | -0.195133333 | -0.334       | -0.1156      | 0.076466667  |
| UHRF1BP1L    | 0.071233333  | -0.1374      | -0.071766667 | 0.254766667  |
| CLTC         | -0.1415      | -0.157166667 | -0.199166667 | -0.060533333 |
| C5orf39      | -0.334233333 | -0.261666667 | -0.194633333 | 0.0481       |
| 4-Mar        | -0.016966667 | -0.143166667 | -0.269766667 | 0.235133333  |
| LPPR2        | -0.155066667 | -0.234866667 | -0.326366667 | 0.054433333  |
| LOC652624    | -0.354866667 | -0.242166667 | 0.0956       | 0.111966667  |
| LOC729236    | -0.351566667 | -0.175033333 | -0.2588      | -0.0349      |
| LOC643997    | -0.015033333 | -0.021533333 | 0.029766667  | 0.286833333  |
| IKZF5        | -0.129733333 | -0.2469      | -0.167933333 | 0.179333333  |
| TUBGCP5      | -0.0183      | -0.1145      | 0.021833333  | 0.2155       |
| CLN5         | -0.3584      | -0.2144      | -0.309466667 | 0.038866667  |
| PEX11A       | -0.091466667 | -0.156633333 | -0.061433333 | 0.214133333  |
| UBA6         | 0.016533333  | -0.1521      | -0.070133333 | 0.176666667  |
| NUTF2        | 0.1036       | -0.1012      | -0.0839      | 0.399466667  |
| PTCD2        | -0.153266667 | -0.085266667 | -0.159066667 | 0.0527       |
| TMEM106B     | -0.493766667 | -0.526566667 | -0.361333333 | -0.2631      |
| NUS1         | -0.299533333 | -0.240566667 | -0.1578      | 0.143666667  |
| DPH5         | -0.4132      | -0.345133333 | -0.435666667 | -0.144566667 |
| LOC442597    | -0.0972      | -0.070066667 | -0.076866667 | 0.138966667  |
| PSMC5        | -0.168233333 | -0.0525      | -0.137733333 | 0.1889       |
| LPHN1        | -0.2798      | -0.327566667 | -0.205866667 | -0.018833333 |
| PLCD3        | -0.1169      | -0.107266667 | -0.260266667 | 0.1965       |
| C21orf63     | 0.0584       | -0.0228      | -0.427033333 | 0.0474       |
| LOC648822    | -0.063033333 | -0.0564      | -0.183       | 0.131466667  |
| LOC644162    | -0.157933333 | -0.075266667 | -0.187966667 | 0.025833333  |
| SHISA2       | -0.038733333 | -0.122766667 | -0.100333333 | 0.264166667  |
| PAIP1        | -0.144733333 | -0.196533333 | -0.171266667 | 0.1895       |
| SLTM         | -0.3816      | -0.214533333 | -0.209433333 | 0.090633333  |
| GLRX3        | 0.080533333  | -0.209533333 | -0.268433333 | 0.3021       |
| LOC100133836 | 0.0916       | -0.031166667 | 0.0695       | 0.500566667  |
| ZDHHC3       | -0.127966667 | -0.096433333 | -0.197933333 | 0.104366667  |
| GALNT12      | -0.0515      | -0.020766667 | -0.0653      | 0.253666667  |
| SIX5         | -0.268966667 | -0.323433333 | -0.5436      | -0.081166667 |
| SMARCA1      | -0.317766667 | -0.2974      | -0.186066667 | -0.030466667 |
| DYNC1LI2     | -0.560166667 | -0.341166667 | 0.0539       | -0.054366667 |
| STT3B        | 0.021533333  | -0.077833333 | -0.007666667 | 0.262266667  |
| TRIM78P      | -0.455366667 | -0.0491      | -0.057533333 | -0.031833333 |
| TNFRSF25     | -0.1251      | -0.177533333 | -0.258166667 | 0.1272       |
| SLC17A9      | 0.1142       | 0.0204       | -0.219566667 | 0.137033333  |
| PPP1CB       | -0.2669      | -0.3173      | -0.1803      | -0.016833333 |
| ST3GAL3      | -0.402433333 | -0.344266667 | -0.1184      | 0.1059       |
| ZDHHC23      | -0.050833333 | -0.0931      | -0.136633333 | 0.0885       |
| FTSJ1        | -0.032166667 | -0.1354      | -0.342466667 | 0.2049       |
| SLC35E4      | 0.0616       | -0.0624      | -0.204566667 | 0.3025       |

|              |              |              |              |              |
|--------------|--------------|--------------|--------------|--------------|
| TCEAL3       | -0.139633333 | -0.2983      | -0.303633333 | 0.018866667  |
| FJX1         | 0.0053       | -0.098066667 | -0.413066667 | 0.149233333  |
| PDCL         | -0.156433333 | 0.044366667  | -0.128733333 | 0.164033333  |
| LOC100129828 | -0.413066667 | -0.068833333 | -0.128066667 | -0.010833333 |
| DNAJC12      | -0.323166667 | -0.169733333 | -0.1046      | 0.030866667  |
| DHRS1        | -0.526633333 | -0.136266667 | -0.120166667 | 0.016366667  |
| FAM113A      | -0.4757      | -0.315233333 | -0.063866667 | 0.023666667  |
| PUS7L        | -0.073466667 | 0.0684       | -0.0448      | 0.1514       |
| RARS2        | -0.1267      | -0.2014      | -0.3398      | 0.1114       |
| FUBP3        | -0.0196      | -0.2325      | -0.2886      | 0.079833333  |
| RARS         | -0.1235      | -0.0632      | -0.274066667 | 0.2068       |
| C9orf9       | -0.138466667 | -0.173566667 | -0.313533333 | 0.139066667  |
| RFC1         | -0.200933333 | -0.0148      | -0.027633333 | 0.170166667  |
| C6orf70      | -0.402333333 | -0.147466667 | -0.384533333 | -0.070466667 |
| RNF41        | -0.089266667 | -0.045366667 | -0.245766667 | 0.1255       |
| WDR23        | -0.502666667 | -0.2739      | -0.310366667 | -0.110433333 |
| PLEKHO2      | -0.221333333 | -0.177933333 | -0.012066667 | 0.2297       |
| GALE         | -0.2884      | 0.006966667  | 0.050466667  | 0.104833333  |
| ZNF805       | -0.170166667 | -0.162033333 | -0.1897      | 0.118466667  |
| POMT1        | -0.339433333 | -0.403133333 | -0.339633333 | -0.099133333 |
| ZHX3         | -0.131166667 | -0.154033333 | 0.019766667  | 0.295133333  |
| LOC651575    | -0.3193      | -0.263433333 | -0.320166667 | -0.193033333 |
| CSNK1D       | -0.034266667 | 0.0914       | 0.1253       | 0.423666667  |
| SIRT7        | -0.103533333 | -0.155333333 | -0.3293      | 0.104366667  |
| LOC391126    | -0.326733333 | -0.120233333 | -0.1176      | 0.085533333  |
| LOC729660    | -0.337833333 | -0.246366667 | -0.181133333 | -0.0033      |
| RBPMS        | -0.186133333 | -0.265066667 | -0.2106      | 0.103966667  |
| TM9SF3       | -0.236333333 | 0.032233333  | -0.257566667 | 0.016333333  |
| KIAA1324L    | -0.423433333 | -0.3489      | -0.349266667 | -0.168433333 |
| PRKAA1       | -0.096833333 | -0.1229      | -0.051433333 | 0.1784       |
| TBC1D13      | -0.2737      | -0.2062      | -0.2005      | 0.095333333  |
| FBXO38       | -0.1443      | -0.194733333 | -0.345066667 | 0.077333333  |
| TXNL2        | 0.141133333  | -0.1025      | -0.222666667 | 0.336833333  |
| LOC158345    | -0.294733333 | -0.309933333 | -0.1464      | 0.061933333  |
| ZNF609       | -0.049566667 | -0.1336      | -0.145366667 | 0.161766667  |
| ATG4A        | -0.183266667 | -0.2194      | -0.0594      | 0.0831       |
| LOC652864    | 0.0654       | -0.2075      | -0.161766667 | 0.124666667  |
| F8A1         | -0.141166667 | -0.211766667 | -0.172333333 | 0.149666667  |
| PIGB         | -0.1229      | -0.1031      | -0.0682      | 0.148866667  |
| LOC645317    | -0.204566667 | -0.1936      | -0.062066667 | 0.005566667  |
| ABHD11       | -0.252       | -0.030666667 | 0.0541       | 0.142266667  |
| C4orf47      | -0.031433333 | -0.152633333 | -0.327466667 | 0.045833333  |
| LOC441642    | -0.335933333 | -0.153       | -0.330566667 | -0.1047      |
| TARDBP       | -0.1045      | -0.082766667 | -0.0667      | 0.0383       |
| NICN1        | -0.460466667 | -0.290833333 | -0.029066667 | -0.093533333 |
| LOC391833    | -0.356966667 | -0.129266667 | 0.004333333  | 0.064966667  |
| PRKAR2A      | -0.074666667 | -0.002633333 | -0.136133333 | 0.244533333  |

|              |              |              |              |              |
|--------------|--------------|--------------|--------------|--------------|
| DTX3         | -0.365233333 | -0.2821      | -0.3887      | -0.048466667 |
| LOC100131205 | -0.3545      | -0.018733333 | -0.210166667 | -0.023466667 |
| SRP9         | 0.067633333  | 0.022233333  | -0.117233333 | 0.277866667  |
| PILRB        | -0.1094      | -0.2671      | -0.156033333 | 0.188866667  |
| ROPN1L       | -0.209466667 | -0.087666667 | -0.2825      | 0.110333333  |
| LOC649447    | -0.379066667 | -0.288333333 | -0.125266667 | -0.0796      |
| XPC          | -0.340133333 | -0.235233333 | -0.430066667 | -0.051133333 |
| LOC729964    | 0.1117       | 0.0022       | -0.249933333 | 0.1524       |
| C16orf13     | -0.142433333 | -0.242766667 | -0.041666667 | 0.1619       |
| CREB5        | 0.133666667  | -0.0172      | 0.0424       | 0.2821       |
| SP100        | -0.224266667 | -0.194966667 | -0.1683      | 0.088633333  |
| CD97         | -0.0683      | 0.1412       | -0.108433333 | 0.210233333  |
| TCP1         | 0.179633333  | -0.1518      | -0.141966667 | 0.180166667  |
| CEP27        | -0.2278      | 0.0171       | -0.096266667 | 0.078033333  |
| GNB2         | -0.052633333 | -0.1267      | -0.200266667 | 0.1846       |
| PREPL        | -0.437066667 | -0.224266667 | -0.1154      | -0.075133333 |
| LOC641727    | -0.147233333 | -0.137066667 | -0.202866667 | 0.057633333  |
| PISD         | 0.027466667  | -0.049266667 | -0.0799      | 0.436133333  |
| ATXN1        | -0.117566667 | -0.120266667 | -0.314033333 | 0.118433333  |
| EXOG         | -0.081633333 | -0.031033333 | -0.175133333 | 0.218966667  |
| TNFSF15      | -0.098633333 | 0.0672       | -0.036966667 | 0.175966667  |
| ZCCHC8       | -0.1218      | -0.311       | -0.3012      | 0.064133333  |
| HBG2         | -0.155466667 | -0.1039      | -0.1763      | 0.197266667  |
| RPS6KB1      | -0.1317      | -0.5343      | -0.1954      | 0.104333333  |
| NDUFA12      | -0.149933333 | -0.1297      | -0.065533333 | 0.114433333  |
| GUSBL2       | -0.142566667 | -0.171933333 | -0.086733333 | 0.0308       |
| FAM96A       | -0.087333333 | -0.1107      | 0.002566667  | 0.2054       |
| SLC35B3      | -0.367033333 | -0.275066667 | -0.141233333 | -0.069433333 |
| RXRΒ         | -0.318233333 | -0.3416      | -0.429633333 | -0.0622      |
| ATP5H        | -0.225866667 | -0.180533333 | -0.1633      | 0.092433333  |
| TRIM61       | -0.102633333 | -0.105533333 | -0.053233333 | 0.2806       |
| C5orf44      | -0.012466667 | -0.184733333 | -0.0923      | 0.1593       |
| WDR54        | -0.0229      | -0.148433333 | -0.265633333 | 0.0459       |
| ZNF84        | -0.201166667 | -0.32        | -0.223       | -0.052133333 |
| CRY1         | 0.175433333  | -0.041066667 | -0.2611      | 0.420333333  |
| HRAS         | 0.060666667  | 0.0304       | -0.237933333 | 0.227233333  |
| COG5         | -0.241366667 | -0.201733333 | -0.080566667 | -0.0114      |
| PPP1R12A     | 0.100133333  | -0.079266667 | -0.1609      | 0.269933333  |
| LMBRD2       | -0.191033333 | 0.0223       | -0.154033333 | 0.197666667  |
| LOC100133950 | -0.028       | -0.075       | -0.1016      | 0.0518       |
| MORN2        | -0.0219      | -0.2012      | -0.280666667 | 0.088        |
| COTL1        | 0.266133333  | -0.011966667 | -0.1324      | 0.3722       |
| PDCD4        | -0.558733333 | -0.2878      | -0.168966667 | -0.181833333 |
| C6orf130     | -0.3607      | -0.254333333 | -0.347133333 | 0.009033333  |
| LOC392285    | -0.024366667 | 0.0095       | -0.114266667 | 0.243633333  |
| SSR2         | 0.164066667  | -0.110766667 | -0.105833333 | 0.1615       |
| EIF3J        | 0.1505       | -0.1513      | 0.033266667  | 0.3545       |

|              |              |              |              |              |
|--------------|--------------|--------------|--------------|--------------|
| STRBP        | -0.054633333 | 0.030633333  | -0.085333333 | 0.272966667  |
| NANS         | -0.1621      | -0.116166667 | -0.192333333 | 0.1204       |
| RPL34        | -0.463433333 | -0.250733333 | -0.1166      | -0.028333333 |
| LOC650159    | -0.000266667 | -0.1248      | -0.148266667 | 0.173366667  |
| LOC730323    | -0.429966667 | -0.2792      | -0.0438      | -0.002366667 |
| KLHL7        | -0.2886      | -0.346733333 | -0.322066667 | 0.011433333  |
| ITPR3        | -0.182333333 | -0.044133333 | -0.1247      | 0.239333333  |
| MAP3K14      | -0.062766667 | -0.1174      | 0.003033333  | 0.468833333  |
| RCCD1        | -0.197066667 | -0.150766667 | -0.220666667 | 0.066666667  |
| LSM6         | 0.148        | 0.218766667  | -0.233366667 | 0.270466667  |
| PPP2R2D      | 0.126666667  | -0.0585      | -0.007533333 | 0.301066667  |
| USP42        | -0.151366667 | -0.305866667 | -0.105933333 | 0.249466667  |
| ADRB2        | 0.343266667  | 0.003433333  | -0.091533333 | 0.355666667  |
| PEX6         | -0.3561      | -0.096766667 | -0.294333333 | -0.0442      |
| MLF1         | -0.2612      | -0.106966667 | -0.183666667 | 0.093266667  |
| FAM45A       | -0.317066667 | -0.384966667 | -0.263833333 | 0.052        |
| CHST14       | -0.374733333 | -0.195633333 | -0.274933333 | 0.014033333  |
| RNF215       | -0.211433333 | -0.1675      | -0.2544      | 0.198633333  |
| LOC388122    | -0.299633333 | 0.0044       | -0.2652      | 0.122166667  |
| POLD2        | 0.026433333  | -0.108766667 | -0.030033333 | 0.252966667  |
| POTEE        | 0.161166667  | -0.169766667 | -0.168       | 0.265366667  |
| IKBIP        | 0.035066667  | 0.176        | -0.3556      | 0.132566667  |
| PGBD1        | 0.2024       | -0.095       | -0.190733333 | 0.2904       |
| LOC91561     | -0.388133333 | -0.285066667 | -0.146633333 | -0.059933333 |
| P2RY11       | -0.088466667 | -0.159933333 | -0.3111      | 0.145933333  |
| RNF10        | -0.0444      | -0.2193      | -0.193533333 | 0.1375       |
| LOC646909    | -0.506733333 | -0.1067      | -0.520466667 | -0.280166667 |
| BRD9         | -0.131633333 | -0.0907      | -0.063133333 | 0.1853       |
| RAB24        | -0.2367      | -0.207533333 | -0.321933333 | 0.0605       |
| LOC100127922 | -0.232366667 | -0.0014      | -0.081866667 | 0.040466667  |
| C2orf43      | -0.2975      | -0.133566667 | -0.1802      | -0.0025      |
| OSGIN2       | -0.018833333 | -0.0575      | -0.062433333 | 0.264033333  |
| FAM13A       | -0.4749      | -0.171866667 | -0.361766667 | -0.110333333 |
| UBE2V1       | 0.063233333  | -0.037966667 | -0.134033333 | 0.265233333  |
| DHX30        | 0.059333333  | 0.0273       | -0.0522      | 0.325266667  |
| LOC653383    | -0.149133333 | -0.146266667 | -0.228133333 | 0.1077       |
| RAGE         | 0.1199       | 0.222666667  | 0.380833333  | 0.615866667  |
| LOC100133163 | -0.190466667 | -0.209733333 | -0.2363      | 0.102933333  |
| GOT2         | -0.074466667 | -0.082066667 | -0.037133333 | 0.216366667  |
| LOC387753    | -0.193166667 | -0.084166667 | -0.3322      | 0.015033333  |
| SNHG1        | 0.022966667  | -0.053566667 | -0.287333333 | 0.098166667  |
| C11orf49     | -0.342633333 | -0.0809      | -0.2237      | -0.056766667 |
| RBM18        | -0.014033333 | -4.00E-04    | 0.0078       | 0.2197       |
| RNF24        | 0.0129       | -0.174566667 | -0.414966667 | -0.098066667 |
| APBA2BP      | -0.329933333 | -0.252166667 | -0.184266667 | 0.010833333  |
| SNORD65      | -0.159866667 | 0.006433333  | 0.0735       | 0.2809       |
| ZNF33B       | -0.271766667 | -0.367766667 | -0.187333333 | 0.000766667  |



|              |              |              |              |              |
|--------------|--------------|--------------|--------------|--------------|
| MBD4         | -0.311533333 | -0.009366667 | -0.026766667 | 0.022333333  |
| TCF12        | -0.337466667 | -0.1424      | -0.287033333 | -0.001233333 |
| LOC541471    | -0.2848      | 0.066266667  | -0.055833333 | 0.394266667  |
| FLJ35801     | -0.0768      | -0.113333333 | -0.032333333 | 0.207733333  |
| RG9MTD1      | -0.016933333 | 0.162466667  | 0.054033333  | 0.290233333  |
| PLA2G2D      | -0.157666667 | 0.028333333  | -0.1733      | 0.015866667  |
| MOSPD1       | -0.4233      | -0.205433333 | -0.349166667 | -0.089       |
| PTPLAD2      | -0.366466667 | 0.005566667  | -0.252966667 | -0.117466667 |
| ABHD8        | -0.5529      | -0.315733333 | -0.4072      | -0.3164      |
| FOXF2        | -0.014633333 | -0.145033333 | -0.2731      | 0.1742       |
| HNRNPU       | -0.328233333 | -0.029233333 | -0.0761      | -0.104833333 |
| KIAA1704     | -0.1135      | -0.1392      | -0.112733333 | 0.0734       |
| LOC730990    | -0.2709      | -0.0864      | -0.114933333 | -0.012266667 |
| CDV3         | 0.085933333  | -0.135266667 | -0.381533333 | 0.093533333  |
| COQ10A       | -0.261666667 | -0.4079      | -0.1924      | 0.013966667  |
| NBPF14       | -0.077566667 | -0.176666667 | 0.0133       | 0.059366667  |
| IFIT2        | -0.4592      | -0.324433333 | -0.197366667 | -0.1624      |
| FTHL7        | -0.2239      | -0.362733333 | -0.2885      | -0.1015      |
| TPM3         | 0.253233333  | 0.078966667  | 0.0318       | 0.3706       |
| DENND4A      | -0.2616      | -0.109933333 | -0.0512      | 0.0862       |
| H2AFY2       | 0.0178       | -0.238266667 | 0.011066667  | 0.324233333  |
| KAZALD1      | -0.264033333 | -0.366566667 | -0.277166667 | 0.0347       |
| SRPK1        | 0.079466667  | 0.0525       | 0.117166667  | 0.3128       |
| LOC100128510 | -0.213666667 | 0.1387       | -0.048       | 0.118        |
| FHOD1        | 0.246366667  | 0.094033333  | -0.2329      | 0.4896       |
| PPIL3        | -0.318266667 | -0.28        | -0.325166667 | -0.062733333 |
| NDST1        | 0.0469       | -0.0715      | -0.0382      | 0.3731       |
| CNOT10       | -0.1372      | -0.177466667 | -0.1141      | 0.0828       |
| VPS4A        | -0.1497      | -0.078633333 | -0.0131      | 0.233866667  |
| STAG3L3      | -0.123233333 | -0.123366667 | 0.069633333  | 0.056        |
| STX4         | -0.146233333 | -0.169666667 | -0.333333333 | 0.158266667  |
| SHOC2        | -0.083433333 | -0.1759      | -0.257366667 | 0.114933333  |
| MOCS2        | 0.038133333  | -0.136166667 | -0.0224      | 0.192266667  |
| IFNGR1       | -0.230966667 | -0.4472      | -0.238366667 | -0.021966667 |
| CHMP1B       | -0.366166667 | -0.511466667 | -0.455166667 | -0.1834      |
| CUTC         | -0.266433333 | -0.071466667 | -0.097466667 | 0.0398       |
| FAM39DP      | -0.168933333 | -0.152733333 | -0.1305      | -0.010766667 |
| C12orf26     | -0.227166667 | -0.255633333 | -0.2829      | 0.145233333  |
| ZNF140       | -0.2964      | -0.063766667 | -0.139       | 0.1229       |
| BEX2         | -0.362133333 | -0.460233333 | -0.5114      | -0.0358      |
| EIF4E3       | -0.223633333 | -0.239733333 | -0.3995      | -0.038766667 |
| LOC642469    | 0.0112       | -0.082866667 | -0.042766667 | 0.236666667  |
| KIAA1279     | -0.064466667 | 0.0026       | 0.047966667  | 0.167533333  |
| ZNF557       | -0.3461      | 0.0652       | -0.1944      | 0.053866667  |
| C5orf24      | -0.132066667 | -0.232066667 | -0.092033333 | 0.0446       |
| LIMS1        | 0.230766667  | -0.0886      | -0.172166667 | 0.421166667  |
| DUXAP3       | -0.3002      | -0.057233333 | -0.054366667 | 0.057333333  |

|              |              |              |              |              |
|--------------|--------------|--------------|--------------|--------------|
| DDX52        | -0.1095      | 0.019266667  | -0.008633333 | 0.232666667  |
| TYW1B        | -0.3218      | -0.1239      | -0.0674      | 0.0864       |
| ADAMTSL5     | -0.016666667 | -0.221333333 | -0.307133333 | 0.140166667  |
| SFXN1        | 0.1437       | 0.100766667  | -0.0594      | 0.3757       |
| FAM105B      | -0.0353      | 0.018266667  | -0.041033333 | 0.256266667  |
| LOC648638    | -0.054066667 | -0.149633333 | -0.119933333 | 0.1786       |
| RPRD2        | -0.27        | -0.185833333 | -0.204733333 | 0.128266667  |
| KRT7         | -0.142533333 | -0.0741      | -0.062333333 | 0.211133333  |
| LOC731915    | -0.141766667 | -0.054866667 | -0.0304      | 0.2379       |
| IPO7         | -0.1104      | -0.1244      | -0.006133333 | 0.088366667  |
| IER5         | 0.047733333  | -0.027833333 | 0.0293       | 0.3879       |
| KIAA1267     | -0.2966      | -0.404733333 | -0.325233333 | -0.0722      |
| GTF2A2       | 0.068133333  | -0.0192      | -0.037966667 | 0.326633333  |
| C5orf33      | -0.148866667 | -0.233766667 | -0.1377      | 0.165        |
| FERMT1       | -0.0751      | -0.0209      | -0.2086      | 0.1698       |
| LOC729841    | -0.138566667 | -0.288166667 | -0.248766667 | 0.008566667  |
| SCD5         | -0.151666667 | -0.169766667 | -0.076733333 | 0.1107       |
| NECAP2       | -0.102933333 | -0.147733333 | -0.279266667 | 0.103833333  |
| FAM149B1     | -0.3599      | -0.337133333 | -0.148366667 | -0.131066667 |
| LOC100133185 | -0.323366667 | -0.2593      | -0.224666667 | -0.087333333 |
| ZBTB22       | -0.3814      | -0.328933333 | -0.285933333 | -0.070766667 |
| KRT15        | -0.068366667 | 0.1955       | -0.252933333 | 0.1296       |
| FAM122A      | -0.203133333 | -0.176233333 | -0.320266667 | 0.023733333  |
| BCKDHB       | -0.416733333 | -0.177733333 | -0.159333333 | -0.041666667 |
| CCDC72       | -0.102466667 | -0.1084      | -0.044533333 | 0.195733333  |
| TMBIM4       | -0.339       | -0.329733333 | -0.1106      | 0.013533333  |
| TRIP4        | -0.064433333 | -0.037166667 | -0.3318      | 0.142866667  |
| UBQLN1       | 0.107466667  | -0.121133333 | -0.1701      | 0.2299       |
| ZFC3H1       | -0.066766667 | -0.244       | -0.187666667 | 0.138166667  |
| LOC100133888 | 0.1318       | -0.0398      | 0.067133333  | 0.127733333  |
| C17orf95     | -0.2313      | -0.257166667 | -0.2165      | -0.025333333 |
| GTF2H2       | 0.0283       | -0.009733333 | -0.102933333 | 0.150066667  |
| C7orf26      | -0.210266667 | -0.210766667 | -0.216466667 | 0.122633333  |
| C12orf44     | -0.0008      | -0.028233333 | -0.2163      | 0.248566667  |
| LOC100133463 | -0.1869      | -0.105666667 | -0.227566667 | 0.1293       |
| PPP1R12C     | -0.072233333 | -0.151866667 | -0.325633333 | 0.1456       |
| LOC653147    | -0.0331      | -0.0308      | -0.117233333 | 0.148933333  |
| NAT14        | -0.409366667 | -0.2858      | -0.2289      | -0.077633333 |
| CRTC3        | -0.0412      | -0.4397      | -0.2746      | 0.132666667  |
| SPSB2        | -0.277533333 | -0.3494      | -0.505666667 | 0.0443       |
| TAF15        | 0.02         | -0.252333333 | -0.107266667 | 0.130833333  |
| GRPEL2       | -0.305633333 | -0.2418      | -0.120866667 | 0.116866667  |
| LOC728002    | -0.294433333 | -0.054066667 | -0.333266667 | -0.054066667 |
| FAM73A       | -0.3721      | 0.060166667  | 0.043733333  | -0.066366667 |
| DDAH2        | -0.1821      | -0.2616      | -0.201633333 | 0.086333333  |
| EXOSC1       | -0.134166667 | -0.150133333 | -0.2125      | 0.0072       |
| TRIM44       | -0.2565      | -0.223933333 | -0.196833333 | 0.054966667  |

|              |              |              |              |              |
|--------------|--------------|--------------|--------------|--------------|
| LOC100131381 | -0.153233333 | -0.191866667 | -0.175266667 | 0.178833333  |
| KIAA0913     | -0.204433333 | -0.270133333 | -0.296833333 | 0.032633333  |
| SPG3A        | -0.015766667 | -0.333633333 | -0.4061      | 0.008533333  |
| GOSR2        | 0.112066667  | -0.124933333 | -0.294566667 | 0.087333333  |
| TMEM85       | -0.140633333 | -0.300466667 | -0.281733333 | 0.095366667  |
| CCBL1        | -0.3507      | -0.092       | 0.017866667  | 0.007566667  |
| PRPS1        | 0.066733333  | -0.0945      | -0.243333333 | 0.2474       |
| RHOA         | -0.3447      | -0.221133333 | -0.3331      | -0.108833333 |
| BUD31        | -0.208566667 | -0.138966667 | -0.411233333 | 0.063133333  |
| LOC728484    | -0.4905      | -0.104666667 | -0.240633333 | -0.018633333 |
| KLHDC8B      | -0.265833333 | -0.341833333 | -0.337866667 | -0.0852      |
| TMEM208      | -0.112666667 | -0.248366667 | -0.296633333 | 0.1036       |
| GBF1         | -0.0483      | -0.0919      | -0.273266667 | 0.077866667  |
| SAFB2        | -0.010533333 | -0.1514      | -0.350533333 | 0.136233333  |
| ACD          | -0.1272      | -0.0475      | -0.148766667 | 0.153666667  |
| GATAD1       | -0.2351      | -0.2389      | -0.231866667 | 0.1523       |
| ARPC1A       | -0.025233333 | -0.080433333 | -0.199233333 | 0.179333333  |
| HCP5         | -0.1061      | -0.106466667 | -0.150166667 | 0.177733333  |
| NIP30        | -0.143033333 | -0.081033333 | -0.0606      | 0.184466667  |
| USP49        | -0.300966667 | -0.036666667 | -0.0986      | -0.001133333 |
| PRPF4        | 0.081233333  | 0.127566667  | 0.031266667  | 0.2992       |
| RCP9         | -0.0743      | 0.032733333  | 0.019766667  | 0.330533333  |
| ZCRB1        | -0.255666667 | -0.2387      | -0.223133333 | 0.046733333  |
| C12orf43     | 0.022966667  | -0.019633333 | -0.133966667 | 0.223533333  |
| LOC650737    | -0.398466667 | -0.242966667 | -0.173433333 | -0.144166667 |
| ALKBH3       | -0.1742      | -0.2174      | -0.163366667 | 0.127433333  |
| TIMM23       | 0.0633       | -0.107533333 | -0.0954      | 0.2297       |
| YARS2        | 0.108666667  | -0.02        | -0.045133333 | 0.3636       |
| GUSB         | -0.325233333 | -0.253466667 | -0.204566667 | 0.106666667  |
| C3orf26      | 0.033366667  | 0.080366667  | -0.108833333 | 0.297966667  |
| LOC100127993 | -0.4095      | -0.071533333 | -0.155733333 | 0.0336       |
| PRRT2        | -0.170633333 | -0.183933333 | -0.341333333 | 0.14         |
| TINP1        | -0.165966667 | -0.1482      | -0.351933333 | 0.093333333  |
| MLH1         | -0.130666667 | -0.204933333 | -0.205933333 | -0.003666667 |
| RPL4         | -0.234166667 | -0.3479      | -0.129166667 | 0.053666667  |
| CYTSB        | -0.340066667 | -0.275233333 | -0.241       | -0.053       |
| VPS26A       | -0.2291      | -0.1811      | -0.0758      | 0.138766667  |
| NFATC2IP     | -0.1731      | -0.0755      | -0.039433333 | 0.2272       |
| LOC100132918 | 0.1899       | 0.033866667  | 0.022966667  | 0.240033333  |
| LOC100130178 | -0.089633333 | -0.0374      | -0.096366667 | 0.253466667  |
| GIN1         | -0.244266667 | -0.224866667 | -0.2314      | -0.0289      |
| LOC654116    | -0.332       | -0.190366667 | -0.070966667 | 0.0334       |
| ZC3H8        | -0.009966667 | -0.121366667 | -0.019166667 | 0.3191       |
| ATMIN        | -0.5084      | -0.218833333 | -0.176666667 | -0.199333333 |
| ERMAP        | -0.250533333 | -0.2666      | -0.402666667 | -0.0716      |
| TRIM41       | -0.218933333 | -0.3182      | -0.1704      | 0.068633333  |
| C9orf3       | -0.062033333 | -0.181566667 | -0.1098      | 0.2121       |

|              |              |              |              |              |
|--------------|--------------|--------------|--------------|--------------|
| TRIO         | -0.052333333 | -0.136366667 | -0.1077      | 0.0038       |
| C22orf27     | -0.1254      | -0.100766667 | -0.120366667 | 0.0996       |
| LOC402644    | -0.146966667 | -0.1213      | 0.074933333  | 0.132933333  |
| TRAF6        | -0.043233333 | -0.156866667 | -0.143033333 | 0.2298       |
| NIP7         | 0.159033333  | 0.0572       | 0.027733333  | 0.393333333  |
| LOC653479    | -0.3129      | -0.2919      | -0.175833333 | 0.0156       |
| PSMG3        | -0.051533333 | -0.1118      | -0.1001      | 0.254233333  |
| JMY          | -0.5173      | -0.6487      | -0.517366667 | -0.322966667 |
| C2orf64      | -0.4328      | -0.356066667 | -0.263233333 | -0.086366667 |
| RC3H2        | -0.185266667 | -0.1806      | -0.0317      | 0.079866667  |
| LOC648294    | -0.079366667 | -0.0525      | -0.3022      | 0.149233333  |
| NUFIP2       | -0.088266667 | -0.1994      | -0.074533333 | 0.173833333  |
| DNAJC15      | -0.321066667 | -0.232433333 | -0.243933333 | -0.000766667 |
| WDR51A       | -0.039733333 | 0.0105       | -0.044666667 | 0.268933333  |
| TIAL1        | -0.029466667 | 0.013066667  | -0.1858      | 0.198433333  |
| RABL5        | -0.0846      | -0.1433      | -0.3643      | 0.067433333  |
| LOC100129237 | -0.198733333 | -0.1504      | -0.202233333 | 0.015433333  |
| LEPREL1      | -0.028066667 | -0.0416      | -0.148066667 | 0.1458       |
| CDC42SE1     | 0.303666667  | -0.016433333 | -0.2993      | 0.5075       |
| ZNF433       | -0.266166667 | -0.1927      | -0.158566667 | 0.113066667  |
| PIH1D1       | -0.000933333 | -0.015566667 | -0.1806      | 0.2163       |
| GOSR1        | -0.144366667 | -0.258533333 | -0.2926      | 0.127333333  |
| ZHX2         | -0.1695      | -0.294466667 | -0.4639      | -0.057033333 |
| MRPL41       | -0.048866667 | -0.023566667 | -0.094533333 | 0.113233333  |
| NACAP1       | -0.198066667 | -0.228366667 | -0.222266667 | -0.044933333 |
| LOC644063    | -0.045066667 | -0.033366667 | -0.098933333 | 0.207466667  |
| LOC654000    | -0.2065      | -0.184       | -0.207533333 | -0.051733333 |
| FVT1         | -0.085266667 | -0.145       | -0.311566667 | 0.107433333  |
| RNF123       | -0.2205      | -0.244533333 | -0.092266667 | 0.1422       |
| LOC100132528 | -0.2368      | -0.105933333 | -0.1536      | 0.164433333  |
| LOC645351    | -0.259133333 | 0.0143       | -0.319533333 | -0.029866667 |
| TWISTNB      | 0.047366667  | 0.0712       | -0.024533333 | 0.274        |
| STXBP4       | -0.310966667 | -0.088566667 | -0.138233333 | -0.074033333 |
| ZSCAN16      | -0.0407      | -0.184033333 | -0.179766667 | 0.2483       |
| C9orf142     | -0.094833333 | -0.1452      | -0.0131      | 0.160633333  |
| H2AFV        | -0.024666667 | -0.0204      | 0.008766667  | 0.136866667  |
| PI4K2A       | -0.241233333 | -0.122633333 | 0.019866667  | 0.084066667  |
| LOC647030    | -0.1999      | -0.077433333 | -0.172066667 | 0.0103       |
| GPR175       | -0.1144      | -0.1593      | -0.2795      | 0.2302       |
| C16orf68     | -0.251766667 | -0.187566667 | -0.209866667 | 0.075866667  |
| CSDE1        | -0.239933333 | -0.237933333 | -0.039966667 | -0.032433333 |
| SUPT3H       | -0.296666667 | -0.168766667 | -0.164533333 | -0.010933333 |
| PDE12        | 0.0725       | 0.008033333  | 0.034166667  | 0.375366667  |
| PKM2         | 0.1057       | -0.1354      | -0.288433333 | 0.057033333  |
| BLOC1S1      | -0.365066667 | -0.241333333 | -0.0676      | 0.0616       |
| LOC144438    | -0.250833333 | -5.00E-04    | -0.001733333 | 0.0686       |
| DCAKD        | -0.437666667 | -0.293733333 | -0.0728      | -0.1537      |

|              |              |              |              |              |
|--------------|--------------|--------------|--------------|--------------|
| C5orf51      | -0.307366667 | -0.360666667 | -0.1437      | 0.121833333  |
| SPPL2A       | -0.0978      | -0.138733333 | -0.094833333 | 0.1501       |
| BRD2         | -0.1581      | -0.2625      | -0.2656      | -0.015966667 |
| SERPINI1     | -0.246833333 | -0.3076      | -0.312533333 | -0.077433333 |
| USP36        | -0.0639      | -0.081833333 | -0.208966667 | 0.158933333  |
| ERLIN1       | -0.015433333 | 0.005866667  | 0.016333333  | 0.195233333  |
| SPOP         | -0.291266667 | -0.207866667 | -0.282366667 | -0.056866667 |
| C14orf82     | -0.238966667 | -0.022966667 | -0.0649      | -0.060566667 |
| LOC645762    | -0.1924      | 0.1262       | -0.2715      | 0.091633333  |
| COBRA1       | 0.050966667  | -0.0397      | -0.165433333 | 0.3156       |
| ARL1         | -0.240466667 | -0.2718      | -0.360033333 | -0.124733333 |
| KCTD18       | -0.401666667 | -0.247033333 | -0.321933333 | -0.0898      |
| RNF113A      | -0.2439      | -0.078133333 | -0.229266667 | 0.1648       |
| ATP2C1       | -0.2005      | -0.215833333 | -0.1622      | -0.022033333 |
| CBLN3        | -0.060833333 | -0.3615      | -0.2221      | 0.0962       |
| TMEM205      | -0.346966667 | -0.205433333 | -0.263333333 | -0.017       |
| ZNF416       | -0.150366667 | 0.0132       | -0.147933333 | 0.1629       |
| CLIP1        | -0.343866667 | -0.297266667 | -0.321       | -0.066533333 |
| LOC644852    | -0.170166667 | -0.0158      | 0.117433333  | 0.1142       |
| USP10        | 0.058333333  | 0.033966667  | 0.046666667  | 0.259033333  |
| LOC401357    | -0.128833333 | -0.346       | -0.265766667 | 0.108466667  |
| LOC550112    | -0.169166667 | -0.1146      | -0.209466667 | 0.051233333  |
| FNDC4        | -0.204333333 | -0.221666667 | -0.2462      | 0.100733333  |
| JAG1         | -0.1265      | -0.125533333 | -0.078433333 | 0.1548       |
| WTAP         | -0.0104      | -0.099933333 | -0.1321      | 0.294033333  |
| ETFB         | -0.283366667 | -0.190233333 | -0.022833333 | -0.1063      |
| WDFY3        | -0.069333333 | -0.152133333 | -0.043666667 | 0.093466667  |
| NSA2         | -0.254266667 | -0.2033      | -0.241866667 | 0.0228       |
| SCAMP1       | -0.087566667 | -0.083133333 | -0.079033333 | -0.035966667 |
| TKT          | -0.2302      | -0.282466667 | -0.1849      | 0.098466667  |
| TPT1         | -0.4283      | -0.329966667 | -0.120833333 | -0.0195      |
| TP53TG3      | -0.534133333 | -0.506133333 | -0.084033333 | -0.052533333 |
| AP1G1        | -0.0464      | -0.0452      | -0.0448      | 0.2036       |
| FBXO8        | -0.344433333 | -0.235166667 | -0.282133333 | -0.034266667 |
| PCBD2        | -0.0689      | -0.258533333 | -0.193       | 0.200566667  |
| LOC642780    | -0.1895      | -0.2866      | -0.205033333 | 0.053533333  |
| SLC36A4      | -0.029133333 | -0.0748      | -0.316066667 | 0.0979       |
| C1orf128     | -0.275933333 | -0.140433333 | -0.199333333 | 0.056266667  |
| C15orf63     | -0.2394      | 0.001466667  | -0.1087      | 0.007633333  |
| C7orf38      | -0.301733333 | -0.1575      | -0.1709      | 0.010366667  |
| CCT6A        | 0.129866667  | -0.1185      | -0.091666667 | 0.1678       |
| GOLT1B       | 0.012666667  | -0.2871      | -0.378066667 | 0.084266667  |
| CETN3        | -0.1513      | 0.032266667  | -0.118933333 | 0.106933333  |
| LOC648210    | -0.012166667 | -0.262433333 | -0.057666667 | 0.194466667  |
| DERL2        | -0.169166667 | -0.019333333 | -0.1503      | 0.128566667  |
| LOC100133019 | -0.362766667 | -0.0704      | -0.078266667 | -0.0725      |
| CPE          | -0.071833333 | -0.092166667 | -0.116566667 | 0.1616       |

|              |              |              |              |              |
|--------------|--------------|--------------|--------------|--------------|
| SMAD7        | 0.071766667  | 0.045233333  | -0.0789      | 0.173333333  |
| WDR82        | -0.2211      | 0.0888       | -0.294866667 | 0.095166667  |
| TMBIM6       | -0.2124      | -0.131933333 | -0.221766667 | 0.072033333  |
| LOC729686    | -0.227066667 | -0.095333333 | -0.2022      | 0.030433333  |
| LOC100129086 | 0.050066667  | -0.1668      | -0.094633333 | 0.201233333  |
| EXOC4        | -0.384366667 | -0.326633333 | -0.057666667 | -0.0777      |
| SELK         | -0.021366667 | -0.089633333 | 0.0005       | 0.263266667  |
| SLC35B4      | -0.1767      | -0.1137      | 0.061366667  | 0.162433333  |
| PLEKHA5      | -0.461366667 | -0.294633333 | -0.2329      | -0.189833333 |
| OBFC1        | -0.2202      | -0.030633333 | -0.187       | 0.102633333  |
| ADPRHL2      | 0.066766667  | -0.14        | -0.096533333 | 0.248766667  |
| MAN1B1       | -0.361433333 | -0.2177      | -0.2845      | -0.0943      |
| PHC2         | 0.203166667  | 0.116        | 0.070466667  | 0.258533333  |
| CCND3        | 0.176333333  | 0.097266667  | 0.0346       | 0.3288       |
| LOC388621    | -0.2978      | -0.173933333 | -0.1863      | 0.0467       |
| CNOT8        | -0.1534      | -0.183       | -0.161933333 | -0.005966667 |
| BLOC1S2      | -0.143366667 | -0.324933333 | -0.2223      | 0.014433333  |
| RRP9         | 0.090133333  | 0.055533333  | -0.1181      | 0.300033333  |
| LOC645691    | -0.062066667 | -0.321966667 | -0.227666667 | -0.0717      |
| XKR8         | -0.073033333 | -0.131366667 | -0.063133333 | 0.135933333  |
| LOC100131609 | -0.0273      | -0.176566667 | -0.1009      | 0.0784       |
| RBM17        | -0.077       | -0.145866667 | -0.2394      | 0.151933333  |
| SMA5         | -0.277633333 | -0.124933333 | -0.0498      | 0.003833333  |
| LOC645466    | -0.1546      | -0.062266667 | -0.053066667 | 0.121466667  |
| CHUK         | 0.112933333  | 0.0192       | -0.0235      | 0.2272       |
| ERCC8        | -0.100666667 | -0.0683      | -0.117433333 | 0.2311       |
| ZMYM6        | -0.4439      | -0.1498      | -0.156       | -0.029033333 |
| LOC643534    | -0.567433333 | -0.095366667 | -0.556166667 | -0.458833333 |
| VKORC1L1     | 0.133533333  | 0.086733333  | -0.0043      | 0.300233333  |
| ANKRD11      | -0.086833333 | -0.213766667 | -0.3601      | -0.053366667 |
| IQCK         | -0.205366667 | -0.336633333 | -0.532       | -0.108166667 |
| PRAMEF13     | -0.209466667 | -0.133566667 | -0.172366667 | 0.203866667  |
| ZNF526       | -0.159       | -0.146533333 | -0.284133333 | -0.0283      |
| GNL3         | 0.037733333  | -0.240733333 | -0.172133333 | 0.1571       |
| DEK          | 0.0537       | 0.0388       | -0.289466667 | 0.160333333  |
| ZNF217       | 0.2143       | -0.0969      | -0.323266667 | 0.2303       |
| ZNF839       | -0.262233333 | 0.016333333  | -0.225866667 | 0.204766667  |
| PRKCI        | 0.055833333  | 0.0425       | -0.098366667 | 0.128433333  |
| LOC730746    | 0.027        | -0.072466667 | -0.119166667 | 0.0949       |
| PEX19        | 0.058066667  | -0.111266667 | -0.1603      | 0.255566667  |
| UBE1DC1      | 0.0283       | -0.068933333 | -0.375766667 | 0.140233333  |
| SLAIN2       | -0.206933333 | -0.127866667 | -0.0983      | 0.111733333  |
| ZNF346       | -0.169766667 | -0.082466667 | -0.0795      | 0.2588       |
| SS18L2       | 0.0366       | -0.099033333 | -0.024633333 | 0.309966667  |
| ABCF2        | 0.1007       | -0.009166667 | -0.1162      | 0.315333333  |
| SEC23IP      | -0.013266667 | 0.001266667  | -0.1007      | 0.170766667  |
| COG1         | 0.0148       | -0.1057      | -0.255366667 | 0.073466667  |

|              |              |              |              |              |
|--------------|--------------|--------------|--------------|--------------|
| BLZF1        | -0.329       | -0.0161      | -0.120866667 | -0.1103      |
| ZNF586       | -0.044366667 | -0.1215      | -0.2188      | 0.087166667  |
| NME1-NME2    | -0.076766667 | -0.066933333 | -0.050433333 | 0.164433333  |
| CAB39        | 3.33E-05     | -0.034433333 | -0.040633333 | 0.3571       |
| SHB          | -0.162033333 | 0.0798       | 0.042433333  | 0.104        |
| ZNF197       | -0.3871      | -0.256633333 | -0.1198      | -0.024633333 |
| CHCHD9       | -0.1165      | -0.233233333 | -0.133       | 0.071366667  |
| LOC100132585 | -0.3346      | 0.130233333  | 0.042333333  | 0.060333333  |
| ZMAT5        | -0.076566667 | -0.141133333 | -0.219533333 | 0.1085       |
| LOC100133627 | 0.038766667  | -0.037166667 | -0.257933333 | 0.189066667  |
| WDR41        | -0.105366667 | -0.144033333 | -0.1039      | 0.081366667  |
| FLJ40722     | -0.5021      | 0.0549       | -0.283233333 | -0.2332      |
| LOC202781    | -0.325733333 | -0.077966667 | 0.012166667  | -0.083766667 |
| LOC644790    | -0.273366667 | -0.129933333 | -0.3761      | 0.013633333  |
| ZFP90        | -0.359566667 | -0.330033333 | -0.246566667 | -0.084133333 |
| OS9          | -0.052533333 | -0.255566667 | -0.3483      | 0.224466667  |
| WNK4         | -0.038233333 | -0.010766667 | -0.0279      | 0.2274       |
| KIAA1199     | 0.267333333  | 0.130233333  | -0.0535      | 0.554133333  |
| DAPK3        | 0.130966667  | -0.1161      | -0.3583      | 0.1128       |
| KIAA0753     | -0.092266667 | -0.008133333 | -0.211166667 | 0.096733333  |
| C21orf58     | -0.199933333 | -0.132733333 | -0.1075      | -0.075566667 |
| DHFR         | -0.179933333 | 0.0608       | 0.0961       | 0.1369       |
| LOC401127    | 0.059466667  | 0.115666667  | -0.068533333 | 0.2594       |
| LOC728602    | -0.371666667 | -0.174266667 | -0.244266667 | -0.2113      |
| PTPRU        | -0.1451      | -0.385866667 | -0.2108      | -0.0012      |
| ZFAND5       | -0.1958      | -0.3062      | -0.362833333 | -0.002       |
| FAM46A       | -0.0719      | -0.029666667 | -0.318033333 | -0.013966667 |
| HMHA1        | 0.013933333  | -0.0687      | -0.1351      | 0.3718       |
| HSPA14       | 0.061366667  | 0.1038       | -0.0803      | 0.421766667  |
| CSNK2B       | -0.041366667 | -0.131166667 | -0.1294      | 0.147766667  |
| DYRK1B       | -0.273166667 | -0.225366667 | -0.2974      | 0.002633333  |
| LANCL2       | -0.105133333 | -0.282233333 | -0.2285      | 0.249366667  |
| TEX10        | 0.106966667  | 0.0312       | 0.132133333  | 0.3208       |
| OGG1         | -0.0962      | -0.111366667 | -0.0704      | 0.1624       |
| MTMR14       | -0.291466667 | -0.211933333 | -0.112533333 | -0.0069      |
| RFP          | -0.2936      | -0.145       | -0.0795      | 0.1253       |
| MRPS21       | -0.288433333 | -0.2719      | -0.163733333 | -0.016166667 |
| TRIM13       | -0.1791      | -0.2166      | -0.1887      | 0.1414       |
| ASL          | -0.021166667 | -0.052033333 | -0.189166667 | 0.1026       |
| FAM13B       | -0.105466667 | -0.265466667 | -0.367066667 | 0.0284       |
| MED7         | -0.055466667 | -0.044566667 | -0.148966667 | 0.232233333  |
| LMAN1        | -0.0244      | -0.104166667 | -0.1717      | 0.101333333  |
| HIST1H3F     | -0.15        | 0.055533333  | -0.057933333 | 0.1665       |
| CDK5RAP2     | -0.048633333 | -0.143966667 | -0.152866667 | 0.241233333  |
| LOC650832    | 0.385033333  | 0.2618       | 0.081533333  | 0.7025       |
| C6orf47      | -0.121733333 | -0.2009      | -0.1818      | 0.109466667  |
| BTF3L4       | 0.0056       | -0.1999      | -0.1908      | 0.138866667  |

|           |              |              |              |              |
|-----------|--------------|--------------|--------------|--------------|
| CDK10     | -0.264566667 | -0.020466667 | -0.066833333 | 0.085        |
| MPP5      | 0.037933333  | -0.041866667 | -0.114766667 | 0.206366667  |
| SFRS9     | -0.026033333 | -0.000266667 | 0.028433333  | 0.113266667  |
| DHX32     | -0.225533333 | -0.264666667 | -0.036566667 | 0.148233333  |
| RPP21     | -0.1596      | -0.096366667 | -0.128233333 | 0.288066667  |
| LDOC1L    | -0.358133333 | -0.155933333 | -0.2602      | 0.060866667  |
| MAGEH1    | -0.163866667 | -0.164233333 | -0.403       | 0.022533333  |
| MON2      | -0.214033333 | -0.285833333 | -0.163933333 | 0.0962       |
| NUDCD2    | -0.359666667 | -0.070733333 | -0.065733333 | -0.0148      |
| LOC90624  | -0.378933333 | 0.016066667  | -0.193666667 | 0.059433333  |
| LOC646197 | 0.024133333  | -0.078933333 | -0.134766667 | 0.0602       |
| COMMD7    | -0.130633333 | -0.193866667 | -0.160033333 | 0.163933333  |
| PIK3IP1   | -0.246966667 | -0.2164      | -0.228466667 | 0.014133333  |
| ZNF580    | -0.364066667 | -0.174733333 | -0.212833333 | 0.0659       |
| TBC1D19   | -0.258533333 | -0.081566667 | -0.136033333 | 0.170566667  |
| LOC653156 | -0.1415      | -0.165466667 | -0.193733333 | 0.063533333  |
| ICT1      | -0.0899      | -0.1338      | -0.1428      | 0.141333333  |
| SAPS2     | -0.156233333 | -0.249366667 | -0.096266667 | 0.004666667  |
| LOC728732 | 0.0032       | -0.2398      | -0.2478      | -0.011566667 |
| UBE2E1    | 0.087666667  | -0.435133333 | -0.188766667 | 7.00E-04     |
| PIK3C2A   | -0.224266667 | -0.535733333 | -0.272166667 | 0.012266667  |
| LRRCC1    | -0.3844      | -0.1095      | 0.004866667  | 0.074233333  |
| BRE       | -0.194433333 | -0.164933333 | -0.163033333 | -0.055666667 |
| C1orf66   | -0.356566667 | -0.2964      | -0.197633333 | -0.0567      |
| C10orf84  | -0.179433333 | -0.157366667 | -0.046066667 | 0.090733333  |
| LOC729852 | -0.155233333 | -0.193533333 | -0.111266667 | 0.052766667  |
| NPAS2     | -0.0705      | 0.014833333  | 0.2038       | 0.1617       |
| ABI2      | 0.039566667  | -0.0605      | -0.060866667 | 0.2208       |
| PCNXL2    | -0.197366667 | -0.176433333 | -0.186933333 | 0.0455       |
| LTA4H     | -0.421366667 | -0.205033333 | -0.083066667 | -0.0108      |
| LOC650111 | 0.223533333  | 0.016033333  | -0.3313      | 0.2049       |
| TNFAIP3   | -0.122166667 | -0.0845      | 0.287566667  | 0.396533333  |
| SNORD36C  | -0.014666667 | -0.029       | -0.2115      | 0.146133333  |
| ASB3      | -0.1931      | -0.123333333 | -0.2118      | -0.010766667 |
| PRKCDBP   | 0.119433333  | 0.075466667  | -0.467866667 | 0.1423       |
| LOC196752 | -0.162866667 | -0.207833333 | -0.077166667 | -0.025566667 |
| LOC643949 | -0.2993      | -0.205633333 | -0.205366667 | -0.165733333 |
| TMED4     | -0.270166667 | -0.0991      | -0.0929      | -0.079633333 |
| RNASEH1   | -0.162433333 | 0.0907       | -0.350733333 | 0.023133333  |
| SMYD3     | -0.3476      | -0.328866667 | -0.2752      | 0.055666667  |
| MBTPS1    | -0.3718      | -0.228733333 | -0.1769      | -0.116       |
| LOC730101 | -0.275833333 | -0.082333333 | -0.1625      | 0.005566667  |
| LOC643357 | 0.0523       | -0.102966667 | -0.104       | 0.116533333  |
| C1RL      | -0.3674      | -0.2016      | -0.2417      | -0.092633333 |
| TCTA      | -0.399033333 | -0.2873      | -0.0929      | -0.002133333 |
| YWHAE     | 0.079733333  | -0.2332      | -0.136933333 | 0.232866667  |
| SCAP      | -0.2208      | -0.2553      | -0.084666667 | -0.0521      |



|              |              |              |              |              |
|--------------|--------------|--------------|--------------|--------------|
| GLYCTK       | -0.182166667 | -0.0958      | 0.029833333  | 0.1667       |
| LOC96610     | -0.019133333 | -0.0493      | -0.090533333 | 0.113966667  |
| ZNF738       | -0.2944      | -0.049133333 | -0.2034      | -0.1412      |
| ARL6         | 0.055066667  | 0.0818       | -0.0548      | 0.073433333  |
| MAP3K7       | 0.085033333  | -0.1524      | -0.104366667 | 0.1218       |
| CDC23        | -0.218466667 | -0.0911      | -0.049966667 | 0.202533333  |
| C18orf21     | -0.043366667 | -0.165333333 | -0.3412      | 0.103233333  |
| GOLSYN       | -0.036233333 | -0.155366667 | -0.3047      | -0.0031      |
| SIRT1        | -0.055966667 | -0.261       | -0.219133333 | 0.152033333  |
| TXNDC5       | -0.126733333 | -0.109566667 | -0.162633333 | -0.0559      |
| TUSC3        | -0.0616      | -0.178766667 | -0.150533333 | 0.101866667  |
| LOC124512    | -0.319866667 | -0.1722      | -0.2245      | 0.0222       |
| LOC442181    | -0.134133333 | 0.040166667  | -0.105266667 | 0.1868       |
| LOC648921    | -0.2529      | -0.112766667 | -0.081233333 | -0.0811      |
| ARF3         | 0.2826       | -0.0983      | -0.206366667 | 0.425566667  |
| FAM89B       | -0.041566667 | -0.1619      | -0.210833333 | -0.0444      |
| ZMYND11      | -0.281       | -0.1749      | -0.244533333 | 0.021433333  |
| CENPN        | 0.0631       | -0.032033333 | -0.102433333 | 0.2145       |
| ULBP2        | 0.258066667  | 0.121066667  | -0.076466667 | 0.360233333  |
| AQP12B       | -0.049833333 | -0.083866667 | -0.183033333 | 0.198133333  |
| COMMD8       | -0.2678      | -0.0033      | -0.162766667 | 0.056233333  |
| EHBP1L1      | -0.1692      | -0.069166667 | -0.133366667 | 0.111233333  |
| MRPL2        | 0.0159       | -0.189766667 | -0.435966667 | 0.060466667  |
| MAP1LC3A     | -0.387833333 | -0.318433333 | -0.169833333 | -0.057033333 |
| SNF8         | -0.227833333 | -0.100633333 | -0.0381      | 0.018166667  |
| GPATCH2      | -0.0724      | -0.113266667 | -0.168966667 | 0.127833333  |
| TOLLIP       | -0.153833333 | -0.180666667 | -0.088566667 | 0.106866667  |
| PRSS12       | -0.184433333 | -0.085       | -0.158633333 | 0.044733333  |
| GMPPB        | -0.0333      | 0.044133333  | -0.1807      | 0.063066667  |
| POLDIP2      | -0.026933333 | -0.0412      | -0.157033333 | 0.166333333  |
| PFKFB4       | -0.4271      | 0.051        | 0.049        | 0.103433333  |
| TRPC4AP      | -0.178733333 | -0.220933333 | -0.168266667 | 0.0209       |
| WBSCR22      | -0.057733333 | -0.126633333 | -0.284866667 | 0.105433333  |
| TM4SF1       | 0.117433333  | 0.029566667  | -0.3281      | 0.2923       |
| HCN4         | -0.1822      | -0.136566667 | -0.261266667 | 0.042866667  |
| LOC100133760 | -0.182033333 | 0.0155       | -0.017533333 | 0.041366667  |
| RPF2         | 0.004733333  | 0.050466667  | -0.0419      | 0.194133333  |
| TMEM44       | -0.185433333 | -0.048333333 | -0.208866667 | -0.069733333 |
| PLDN         | -0.298366667 | -0.053866667 | -0.072       | 0.040033333  |
| ZNF841       | -0.195733333 | -0.0103      | -0.2332      | -0.0509      |
| HADH         | -0.156666667 | -0.220233333 | -0.167       | 0.024033333  |
| ARHGEF3      | -0.502933333 | -0.2719      | -0.098266667 | -0.013066667 |
| SPG21        | 0.028833333  | -0.443833333 | -0.136066667 | 0.155833333  |
| LOC493869    | -0.2025      | -0.1396      | -0.508533333 | -0.1297      |
| DDX21        | 0.1824       | 0.077066667  | -0.0111      | 0.3712       |
| MIB2         | -0.2794      | -0.1933      | -0.316433333 | -0.0831      |
| FAM175A      | -0.313966667 | 0.098233333  | 0.092166667  | 0.106166667  |

|              |              |              |              |              |
|--------------|--------------|--------------|--------------|--------------|
| AVL9         | 0.0069       | -0.014533333 | -0.039933333 | 0.326966667  |
| PPP1R3F      | -0.2354      | -0.134966667 | -0.065133333 | 0.132566667  |
| LSM12        | 0.127533333  | -0.0526      | 0.1135       | 0.102233333  |
| PDZD8        | 0.120666667  | -0.039766667 | -0.0322      | 0.156866667  |
| C20orf20     | 0.183466667  | 0.172266667  | -0.028966667 | 0.284033333  |
| PLS3         | -0.116033333 | -0.073866667 | -0.304666667 | -0.034933333 |
| LOC100132060 | 0.000266667  | -0.076766667 | -0.057466667 | 0.336166667  |
| RPL6         | 0.1247       | -0.013666667 | -0.039633333 | 0.390833333  |
| LOC402112    | -0.002566667 | -0.276066667 | -0.0691      | 0.119666667  |
| UTP14C       | -0.247333333 | -0.077066667 | -0.138633333 | 0.044033333  |
| LOC645630    | -0.517833333 | -0.344366667 | -0.439333333 | -0.204566667 |
| INO80        | -0.082533333 | -0.091666667 | -0.1199      | 0.208533333  |
| SDHA         | -0.166766667 | -0.151533333 | -0.144       | 0.076166667  |
| PI4KB        | -0.139366667 | -0.1052      | -0.0811      | 0.156833333  |
| NOC4L        | -0.049833333 | -0.039066667 | -0.0556      | 0.220533333  |
| ZC3H18       | -0.080633333 | -0.012       | -0.107333333 | 0.1446       |
| DNLZ         | -0.066666667 | -0.150166667 | -0.199133333 | 0.1527       |
| SSBP1        | 0.0197       | -0.0286      | -0.106566667 | 0.278166667  |
| WBSCR27      | -0.239733333 | -0.174833333 | -0.157033333 | -0.0392      |
| KIAA0261     | -0.077533333 | -0.087633333 | -0.123333333 | 0.087433333  |
| PSENN        | -0.192       | -0.194366667 | -0.206766667 | 0.1922       |
| TSC22D2      | 0.036733333  | -0.376333333 | -0.423666667 | 0.047533333  |
| RNU86        | -0.025933333 | -0.127466667 | -0.153933333 | 0.1018       |
| TIMM22       | -0.021633333 | -0.072566667 | -0.0796      | 0.2279       |
| SDCCAG3      | -0.122       | -0.0156      | -0.030433333 | 0.1267       |
| LOC654126    | 0.021966667  | -0.0691      | -0.0148      | 0.2617       |
| TTC30A       | -0.133166667 | -0.120366667 | -0.389666667 | -0.0216      |
| SDHAP2       | -0.185966667 | -0.288066667 | -0.212633333 | 0.073866667  |
| IRAK4        | -0.353833333 | -0.119566667 | -0.054066667 | 0.019066667  |
| DOLK         | -0.233033333 | -0.138033333 | -0.280533333 | 0.167233333  |
| ESD          | -0.150166667 | -0.360933333 | -0.024633333 | 0.123466667  |
| ING4         | -0.369033333 | -0.255266667 | -0.333033333 | -0.190033333 |
| LOC391169    | -0.1531      | 0.1349       | -0.107266667 | 0.062466667  |
| LOC100132418 | 0.0123       | -0.2071      | -0.017333333 | 0.195833333  |
| FAH          | -0.1784      | -0.014733333 | 0.038666667  | 0.153166667  |
| TMUB2        | -0.226866667 | -0.234566667 | -0.235366667 | -0.0039      |
| RAB34        | -0.168633333 | -0.064633333 | -0.164333333 | 0.121633333  |
| PPP2R2A      | 0.054133333  | 0.0139       | -0.009966667 | 0.136933333  |
| LOC400558    | -0.031066667 | 0.023533333  | -0.074266667 | 0.326966667  |
| VPS8         | -0.392866667 | -0.304433333 | -0.146966667 | -0.0865      |
| NUMB         | 0.220033333  | 0.018233333  | 0.007766667  | 0.323933333  |
| C17orf61     | -0.294866667 | -0.186033333 | -0.1141      | -0.048166667 |
| TOP1P2       | -0.0435      | 0.160433333  | 0.1205       | 0.245333333  |
| TMEM111      | -0.266933333 | -0.240466667 | -0.1461      | 0.024533333  |
| CCDC104      | -0.1712      | -0.2275      | -0.236566667 | -0.056633333 |
| AP2B1        | -0.231533333 | -0.263933333 | -0.299766667 | 0.0149       |
| UGDH         | -0.268       | -0.099466667 | -0.138633333 | 0.0979       |

|              |              |              |              |              |
|--------------|--------------|--------------|--------------|--------------|
| LOC100131572 | -0.4571      | -0.229       | -0.368333333 | -0.193333333 |
| THUMPD2      | 0.103333333  | 0.032633333  | 0.010133333  | 0.2951       |
| SUMO2        | -0.261966667 | -0.1123      | -0.2759      | -0.042733333 |
| CTDSP1       | -0.110666667 | -0.2779      | -0.180166667 | 0.042833333  |
| PIAS3        | 0.0526       | -0.178266667 | -0.1302      | 0.1421       |
| RHEB         | -0.0446      | 0.001866667  | -0.103233333 | 0.2181       |
| C13orf7      | -0.0543      | 0.007866667  | 0.061466667  | 0.192633333  |
| NCSTN        | -0.2863      | -0.271133333 | -0.201166667 | -0.0611      |
| FIS1         | -0.2445      | -0.319233333 | -0.033066667 | 0.0373       |
| SNORD12C     | -0.087633333 | -0.100866667 | 0.137833333  | 0.2527       |
| NIPSNAP3A    | -0.3098      | -0.1519      | -0.142366667 | 0.0793       |
| ATP13A3      | -0.127933333 | 0.1584       | 0.120433333  | 0.189766667  |
| PKN1         | -0.1447      | -0.189733333 | -0.2814      | -0.0829      |
| TLN1         | 0.1467       | -0.175033333 | -0.2697      | 0.149566667  |
| KCMF1        | 0.176933333  | -0.116866667 | -0.191466667 | 0.162933333  |
| KIAA1271     | -0.286133333 | -0.1567      | -0.2945      | -0.023466667 |
| LOC730994    | -0.223433333 | -0.248333333 | -0.434133333 | -0.112133333 |
| STMN1        | -0.036933333 | -0.1285      | 0.016166667  | 0.2065       |
| LOC649839    | -0.3724      | -0.190333333 | -0.347333333 | -0.223066667 |
| MAPK7        | 0.119        | -0.199766667 | -0.242666667 | 0.078333333  |
| UBAC1        | -0.107366667 | -0.034466667 | -0.0833      | 0.109533333  |
| IFT80        | -0.048666667 | -0.275233333 | -0.0767      | 0.0359       |
| ZNF773       | -0.150233333 | -0.0275      | -0.192466667 | 0.048033333  |
| RAD17        | -0.214433333 | -0.2397      | -0.214166667 | -0.0241      |
| LOC728127    | -0.100666667 | -0.0512      | -0.058433333 | 0.2202       |
| LOC642282    | -0.1616      | -0.189066667 | -0.151433333 | -0.0276      |
| LOC550643    | -0.4173      | -0.273466667 | -0.063833333 | -0.063533333 |
| TSKU         | -0.110933333 | -0.308733333 | -0.313433333 | 0.063066667  |
| LOC100128196 | -0.192766667 | -0.1405      | -0.266233333 | 0.097433333  |
| DHX40        | -0.3859      | -0.334966667 | -0.122366667 | -0.098133333 |
| C13orf3      | 0.1104       | 0.0701       | -0.025966667 | 0.3149       |
| SENP2        | -0.188333333 | -0.075133333 | -0.228166667 | 0.1648       |
| SEC24A       | -0.017633333 | 0.1303       | -0.1995      | 0.080933333  |
| MGC16169     | -0.240566667 | -0.2038      | -0.2506      | 0.047466667  |
| YME1L1       | 0.053033333  | -0.034666667 | -0.1619      | 0.1688       |
| FLJ38717     | -0.215266667 | -0.113966667 | -0.1917      | -0.134566667 |
| ENPP4        | -0.095466667 | -0.0776      | -0.0265      | 0.163366667  |
| HK1          | 0.0092       | 0.094766667  | -0.016433333 | 0.343166667  |
| ATP9A        | -0.2929      | -0.214       | -0.2037      | -0.046066667 |
| TGFA         | 0.359733333  | 0.5282       | 0.252166667  | 0.253033333  |
| WWP2         | 0.0544       | -0.284266667 | -0.104533333 | 0.1943       |
| DEGS1        | 0.005466667  | 0.087933333  | -0.088433333 | 0.235066667  |
| UTP15        | 0.055366667  | 0.065033333  | 0.072633333  | 0.331433333  |
| ZSCAN2       | -0.262266667 | -0.2608      | -0.1951      | -0.007666667 |
| SHQ1         | -0.134233333 | -0.042566667 | -0.0155      | 0.2016       |
| NARG2        | 0.0245       | -0.066133333 | 0.0099       | 0.088833333  |
| BANP         | -0.0541      | -0.021933333 | -0.155766667 | 0.110333333  |

|              |              |              |              |              |
|--------------|--------------|--------------|--------------|--------------|
| 1-Mar        | -0.104466667 | -0.022033333 | -0.2611      | 0.008        |
| PDCD2        | -0.0567      | -0.099733333 | -0.0797      | 0.262466667  |
| CEP120       | -0.0689      | -0.058433333 | -0.172266667 | 0.135933333  |
| TSPYL1       | -0.147033333 | -0.183633333 | -0.302833333 | 0.048266667  |
| SNAPC4       | 0.043        | -0.064033333 | -0.0811      | 0.1798       |
| LOC202227    | -0.1716      | 0.015366667  | -0.2822      | -0.0903      |
| ARL16        | -0.214466667 | -0.036066667 | 0.172433333  | 0.100866667  |
| CBX7         | -0.4321      | -0.285833333 | -0.1444      | -0.206766667 |
| UBA52        | -0.191933333 | -0.159266667 | -0.164766667 | 0.062466667  |
| SNRPC        | -0.119533333 | -0.155666667 | -0.1908      | 0.118466667  |
| IGFBP3       | -0.2941      | -0.007766667 | -0.140266667 | 0.101233333  |
| LOC153561    | -0.2989      | -0.134066667 | -0.145433333 | -0.0256      |
| BCL6         | 0.203833333  | -0.2164      | -0.4255      | 0.083        |
| AKR1A1       | -0.246933333 | -0.244233333 | -0.018633333 | 0.098666667  |
| PSMC4        | -0.034066667 | -0.158266667 | 0.136766667  | 0.213933333  |
| LOC100127918 | 0.076233333  | -0.168366667 | -0.087366667 | 0.167        |
| GORASP1      | 0.012566667  | -0.194833333 | -0.261566667 | 0.152166667  |
| SUPT4H1      | -0.044266667 | -0.233766667 | -0.2264      | 0.190833333  |
| LOC100131989 | -0.247133333 | -0.002133333 | -0.104033333 | -0.0959      |
| DULLARD      | -0.171533333 | -0.124333333 | -0.2185      | 0.113633333  |
| POM121C      | -0.089266667 | -0.121166667 | -0.033366667 | 0.1602       |
| LOC100129502 | -0.139033333 | 0.1307       | 0.032733333  | -0.026533333 |
| MTX3         | -0.150933333 | -0.067533333 | -0.108866667 | 0.1828       |
| IGFBP5       | -0.136433333 | -0.217166667 | -0.264433333 | 0.030966667  |
| PPP1R16A     | 0.044966667  | -0.137566667 | -0.286133333 | 0.147533333  |
| LOC100131866 | -0.4705      | -0.1184      | -0.288566667 | -0.0982      |
| C21orf56     | -0.1328      | -0.087933333 | -0.2461      | 0.1726       |
| PDPR         | -0.398966667 | -0.236666667 | -0.367       | -0.201766667 |
| HNRNPK       | 0.111133333  | -0.125766667 | 0.019566667  | 0.222366667  |
| PHRF1        | 0.138366667  | 0.049866667  | -0.079       | 0.272166667  |
| AP3M1        | -0.1824      | 0.0141       | -0.136133333 | 0.093833333  |
| LAMB2        | -0.154966667 | -0.202033333 | -0.411       | 0.0002       |
| KDSR         | -0.059533333 | -0.241833333 | -0.198733333 | 0.083233333  |
| MED20        | -0.1604      | -0.264266667 | -0.3557      | -0.123533333 |
| GTF2E2       | 0.025633333  | -0.029966667 | -0.1412      | 0.1663       |
| C1orf58      | -0.1153      | -0.0212      | -0.148233333 | 0.1347       |
| XPO6         | 0.0446       | 0.046533333  | -0.003333333 | 0.161366667  |
| LOC100133609 | 0.441866667  | 0.546466667  | 0.2707       | 0.5158       |
| TLN2         | -0.150733333 | -0.1029      | -0.1305      | 0.186966667  |
| TRAPPC1      | -0.139266667 | -0.119266667 | -0.059866667 | 0.144466667  |
| C11orf24     | -0.089433333 | 0.0199       | 0.054133333  | 0.2685       |
| SECISBP2     | -0.273633333 | -0.205933333 | -0.079233333 | 0.026833333  |
| LOC100129566 | 0.0148       | -0.052666667 | -0.1663      | 0.0898       |
| PGPEP1       | -0.2271      | -0.136533333 | -0.204       | 0.0418       |
| TAPBPL       | -0.049366667 | -0.293866667 | -0.216233333 | 0.110533333  |
| SMARCC2      | -0.2357      | -0.135533333 | -0.219333333 | -0.099833333 |
| LOC113386    | -0.270733333 | 0.017633333  | -0.082433333 | 0.030633333  |

|              |              |              |              |              |
|--------------|--------------|--------------|--------------|--------------|
| FAM100B      | -0.031466667 | 0.259666667  | 0.156333333  | 0.111466667  |
| CDH2         | 0.093066667  | -0.035666667 | -0.410066667 | 0.0527       |
| CNDP2        | -0.169566667 | -0.212266667 | -0.058733333 | 0.068033333  |
| BBS10        | -0.104533333 | -0.038433333 | -0.112366667 | 0.139333333  |
| POLR2E       | -0.194466667 | 0.005466667  | -0.1214      | 0.003666667  |
| CSNK1G3      | -0.082433333 | -0.2405      | -0.038866667 | 0.0516       |
| DCUN1D4      | -0.203233333 | -0.087433333 | -0.223766667 | 0.0832       |
| CDC42SE2     | 0.022666667  | 0.001333333  | -0.2284      | 0.108033333  |
| DDX19A       | -0.166333333 | 0.0144       | -0.042566667 | 0.077766667  |
| MAP3K7IP2    | -0.078033333 | -0.2312      | -0.162266667 | -0.0221      |
| ABCG1        | -0.1442      | -0.064633333 | -0.115       | 0.023933333  |
| GNL1         | -0.306       | -0.222066667 | -0.0275      | -0.122733333 |
| LOC729905    | -0.005966667 | -0.0916      | -0.1336      | 0.169633333  |
| PNPT1        | -0.267566667 | 0.035        | 0.0339       | -0.048466667 |
| PSMF1        | -0.121633333 | -0.2404      | -0.143633333 | 0.003266667  |
| GOPC         | -0.153       | -0.1898      | -0.117       | 0.1407       |
| LIAS         | -0.2474      | -0.159366667 | -0.358533333 | -0.0871      |
| EIF4E        | 0.1072       | 0.047366667  | -0.143333333 | 0.174233333  |
| C7orf23      | -0.210766667 | -0.232833333 | -0.2843      | 0.009233333  |
| SNX29        | -0.2264      | -0.2229      | -0.1687      | -0.009566667 |
| LOC644889    | -0.2144      | -0.166533333 | -0.221166667 | 0.081333333  |
| LOC285943    | -0.085533333 | -0.088966667 | 0.035066667  | 0.2866       |
| LOC645605    | 0.0334       | -0.307033333 | 9.00E-04     | 0.082833333  |
| CFI          | -0.001066667 | -0.214933333 | -0.162233333 | 0.045566667  |
| DCTN5        | -0.078933333 | -0.085533333 | -0.153566667 | 0.149866667  |
| VPS33B       | -0.0468      | -0.195566667 | -0.1163      | 0.124966667  |
| MBD1         | -0.08        | -0.108333333 | -0.112466667 | 0.1953       |
| KLHDC4       | -0.016633333 | -0.0696      | -0.039266667 | 0.1502       |
| REPIN1       | -0.1149      | -0.123633333 | -0.169466667 | 0.1136       |
| LOC652826    | 0.1772       | -0.173733333 | -0.013666667 | 0.273533333  |
| CTTNBP2NL    | -0.0234      | -0.1736      | -0.120066667 | 0.0859       |
| POMT2        | -0.107633333 | -0.2789      | -0.225       | 0.0542       |
| TESK1        | -0.1419      | -0.2918      | -0.331633333 | 0.1235       |
| FAM21A       | -0.067       | -0.15        | -0.1938      | 0.009466667  |
| UROD         | -0.1539      | -0.191033333 | 0.032233333  | 0.070533333  |
| MAPK8        | 0.088266667  | -0.009633333 | 0.013133333  | 0.243433333  |
| CALM2        | 0.107133333  | 0.043833333  | -0.126033333 | 0.273333333  |
| FAM40B       | -0.301966667 | -0.0238      | -0.116766667 | -0.087966667 |
| VPS25        | -0.0685      | -0.1875      | -0.109033333 | 0.150533333  |
| CWC22        | 0.005366667  | 0.0191       | -0.1709      | 0.186433333  |
| NEDD1        | 0.033433333  | 0.0406       | -0.040633333 | 0.1467       |
| PIPSL        | 0.0189       | -0.127233333 | -0.222333333 | 0.157066667  |
| CCDC76       | -0.038166667 | -0.0143      | -0.109466667 | 0.1454       |
| LOC728809    | -0.232466667 | 0.013966667  | 0.097566667  | 0.037733333  |
| ELOVL5       | -0.302566667 | -0.2124      | -0.1804      | -0.1201      |
| DKFZp434K191 | -0.125966667 | 0.057266667  | -0.269933333 | 0.000466667  |
| PURA         | -0.087433333 | -0.0318      | -0.155266667 | 0.0363       |

|              |              |              |              |              |
|--------------|--------------|--------------|--------------|--------------|
| NKTR         | -0.067233333 | -0.0453      | -0.092066667 | 0.024633333  |
| IFIT3        | -0.238633333 | -0.0754      | -0.160266667 | 0.1287       |
| GATC         | 0.072933333  | -0.016       | -0.0571      | 0.254733333  |
| MTMR6        | 0.055233333  | -0.085833333 | -0.152633333 | 0.151        |
| PTK2         | -0.0134      | -0.229933333 | -0.057866667 | -0.018533333 |
| GAPVD1       | -0.1359      | -0.110166667 | 0.005433333  | 0.1429       |
| UXT          | 0.0385       | -0.194966667 | -0.0992      | 0.1991       |
| C1orf103     | -0.100033333 | -0.085966667 | 0.0052       | 0.1123       |
| USMG5        | 0.007566667  | -0.247633333 | -0.022433333 | 0.1469       |
| C14orf179    | -0.276333333 | -0.286033333 | -0.280666667 | -0.0665      |
| CRY2         | -0.035666667 | -0.323266667 | -0.3515      | 0.101433333  |
| MED29        | -0.323866667 | -0.294966667 | -0.347266667 | -0.086       |
| BBS9         | -0.221633333 | -0.257666667 | -0.1381      | -0.083466667 |
| RNFT2        | -0.252766667 | -0.0543      | -0.119033333 | 0.126033333  |
| DNAJB12      | -0.1649      | -0.169633333 | -0.148733333 | 0.1595       |
| MIR574       | -0.091       | -0.155733333 | -0.225066667 | -0.046266667 |
| FKBP14       | -0.126166667 | 0.205033333  | -0.216966667 | 0.0244       |
| VPS35        | -0.129566667 | -0.404       | -0.1186      | 0.011333333  |
| FAM82A2      | -0.077833333 | -0.1581      | -0.099533333 | 0.1123       |
| POLE3        | 0.057666667  | -0.1126      | -0.043666667 | 0.1509       |
| POLR3A       | -0.077833333 | 0.029        | -0.090333333 | 0.1794       |
| SPTLC1       | -0.210233333 | 0.012066667  | 0.028866667  | 0.039266667  |
| MFAP3        | -0.1349      | 0.044666667  | -0.1198      | 0.173166667  |
| RAPGEF2      | -0.110166667 | -0.334033333 | -0.338333333 | -0.040533333 |
| JPH2         | -0.166766667 | -0.067666667 | -0.030933333 | 0.176233333  |
| MGC2752      | -0.039966667 | -0.117166667 | -0.118633333 | 0.065866667  |
| SLC22A5      | -0.043666667 | -0.106133333 | -0.088733333 | 0.083166667  |
| GTF2H1       | -0.282966667 | -0.274066667 | -0.2416      | -0.141933333 |
| BBX          | -0.411266667 | -0.0434      | -0.299566667 | -0.170866667 |
| LRRC29       | -0.3434      | -0.1908      | -0.129266667 | -0.031533333 |
| CCRN4L       | 0.1105       | 0.125033333  | -0.0631      | 0.2996       |
| IK           | -0.1448      | -0.1699      | 0.029966667  | 0.091633333  |
| ANLN         | 0.191666667  | 0.0808       | -0.2367      | 0.2231       |
| GOLPH3L      | -0.244833333 | -0.312866667 | -0.293166667 | -0.122666667 |
| NUP62        | -0.030533333 | 0.118133333  | -0.0325      | 0.2274       |
| LOC644936    | 0.330033333  | 0.1772       | -0.346966667 | 0.462133333  |
| SETBP1       | -0.101733333 | -0.044966667 | -0.1012      | 0.0184       |
| ZNF14        | -0.204066667 | 0.174566667  | 0.0682       | 0.0637       |
| SNORA63      | -0.055266667 | -0.043366667 | -0.0666      | 0.083233333  |
| NDNL2        | -0.055566667 | -0.130466667 | -0.091733333 | 0.19         |
| FBXW2        | -0.021666667 | 0.019066667  | -0.054966667 | 0.140933333  |
| LOC100131859 | -0.087133333 | 0.017933333  | -0.090666667 | 0.118766667  |
| C14orf131    | -0.240033333 | -0.1808      | -0.227666667 | -0.0612      |
| PTPN14       | 0.1374       | 0.121866667  | -0.045333333 | 0.232433333  |
| SFRS13A      | 0.0097       | 0.1382       | -0.188466667 | 0.149433333  |
| RRM1         | -0.020233333 | -0.064266667 | -0.077933333 | 0.200566667  |
| AP2A2        | -0.155633333 | -0.024333333 | -0.117866667 | 0.0651       |

|              |              |              |              |              |
|--------------|--------------|--------------|--------------|--------------|
| ZNF26        | 0.011466667  | -0.0183      | 0.0097       | 0.236666667  |
| MOXD1        | -0.229633333 | -0.2674      | -0.075       | -0.038233333 |
| SNORD69      | -0.078233333 | -0.110233333 | -0.1602      | 0.011133333  |
| ZNF500       | -0.153633333 | -0.058533333 | -0.3972      | 0.001        |
| LLGL1        | -0.225133333 | -0.3778      | -0.3323      | -0.176666667 |
| LOC728505    | -0.0444      | 0.034833333  | -0.0639      | 0.2075       |
| ADNP2        | -0.1349      | 0.084066667  | -0.020133333 | 0.163033333  |
| VPS29        | -0.0377      | 0.0591       | -0.1238      | 0.2417       |
| KPNA4        | 0.148533333  | -0.063733333 | -0.1268      | 0.175266667  |
| ZFYVE27      | -0.061933333 | -0.078266667 | 0.0395       | 0.1614       |
| LOC643433    | -0.311       | -0.3539      | -0.086566667 | -0.048533333 |
| ORAI2        | -0.0856      | -0.005766667 | -0.064033333 | 0.214966667  |
| C13orf34     | 0.002833333  | 0.011333333  | -0.018766667 | 0.199933333  |
| B9D2         | 0.0393       | -0.174033333 | -0.275866667 | 0.209066667  |
| PHF12        | -0.233433333 | -0.121033333 | -0.311366667 | -0.003133333 |
| GFOD2        | 0.0266       | 0.003666667  | -0.076333333 | 0.220266667  |
| SNORA80      | -0.065666667 | 0.071233333  | -0.009966667 | 0.2532       |
| MAN1A2       | -0.183266667 | -0.1326      | -0.190233333 | 0.038633333  |
| ZNF143       | 0.198966667  | -0.0024      | -0.025966667 | 0.2877       |
| DLG5         | -0.019733333 | -0.134733333 | -0.0718      | 0.242033333  |
| FAM172A      | -0.3198      | -0.179266667 | -0.195533333 | -0.163366667 |
| MAGT1        | -0.310966667 | -0.003933333 | -0.038633333 | -0.0402      |
| LOC100128326 | -0.2383      | -0.2229      | -0.096266667 | 0.077233333  |
| LOC100134083 | -0.097333333 | -0.201866667 | -0.149766667 | 0.077166667  |
| LOC730993    | -0.2293      | 0.037066667  | -0.018033333 | -0.024466667 |
| SIPA1L1      | 0.040333333  | -0.2906      | 0.0143       | 0.136866667  |
| C1orf189     | 0.064466667  | -0.052833333 | -0.052433333 | 0.289966667  |
| MFAP1        | -0.0474      | -0.1239      | -0.088466667 | 0.152266667  |
| TBC1D9B      | -0.115466667 | -0.204433333 | -0.356333333 | -0.020266667 |
| ZNHIT3       | -0.159866667 | -0.080066667 | -0.163233333 | 0.035933333  |
| FBXW4        | -0.327033333 | -0.2553      | -0.1168      | -0.0076      |
| C18orf45     | -0.207433333 | 0.1181       | 0.182433333  | 0.134533333  |
| DTWD2        | -0.269166667 | 0.0219       | -0.0107      | -0.164466667 |
| CENPL        | 0.006666667  | 0.035633333  | -0.046133333 | 0.1772       |
| CACNB3       | -0.285333333 | -0.190066667 | -0.1545      | -0.042166667 |
| LOC649548    | -0.1642      | -0.064866667 | -0.177066667 | 0.078933333  |
| COG4         | -0.221766667 | -0.194366667 | -0.129       | 0.0227       |
| ABCF1        | -0.137133333 | 0.1144       | 0.0017       | 0.161233333  |
| BET1L        | -0.092766667 | -0.336633333 | -0.298333333 | 0.011666667  |
| SNAP23       | -0.236466667 | -0.136233333 | -0.107533333 | 0.0749       |
| C1orf133     | 0.384133333  | 0.039166667  | -0.490433333 | 0.272833333  |
| LEPROT       | -0.179333333 | 0.0967       | -0.096033333 | 0.018266667  |
| LOC389286    | -0.1018      | -0.205       | -0.0072      | 0.039966667  |
| SATB2        | 0.036966667  | 0.054633333  | 0.069433333  | 0.243966667  |
| PPP1R10      | -0.1944      | 0.125        | -0.0321      | 0.258733333  |
| LOC729780    | -0.240866667 | -0.074533333 | -0.0392      | 0.084966667  |
| SUGT1        | -0.081566667 | 0.0368       | -0.1335      | 0.032166667  |

|           |              |              |              |              |
|-----------|--------------|--------------|--------------|--------------|
| EMP3      | -0.1308      | -0.073866667 | 0.086866667  | 0.2884       |
| CSAG2     | -0.2306      | -0.3465      | -0.156266667 | -0.060533333 |
| TMEM93    | -0.0755      | -0.093133333 | -0.015933333 | 0.100733333  |
| TRIT1     | -0.0876      | -0.077933333 | -0.061833333 | 0.148266667  |
| SALL2     | -0.193233333 | -0.3157      | -0.2102      | -0.089466667 |
| XPA       | -0.086033333 | -0.163533333 | -0.111033333 | 0.138566667  |
| LOC647302 | -0.121366667 | -0.055933333 | -0.040066667 | 0.099533333  |
| ZNF212    | -0.117433333 | -0.2215      | -0.225166667 | 0.001733333  |
| WDR19     | -0.333266667 | -0.288766667 | -0.3291      | -0.160966667 |
| NBPF11    | -0.0628      | -0.140866667 | -0.022866667 | 0.001266667  |
| DST       | -0.132166667 | 0.0822       | 0.014966667  | 0.005366667  |
| CDR2      | 0.2473       | -0.105366667 | -0.493866667 | 0.0458       |
| MRPS11    | -0.017666667 | 0.056466667  | -0.045966667 | 0.106266667  |
| KIF11     | 0.2039       | -0.079533333 | -0.120166667 | 0.2112       |
| IKBKE     | -0.1145      | -0.2267      | -0.1894      | 0.008966667  |
| COMMD6    | -0.266133333 | -0.199033333 | -0.1791      | -0.048366667 |
| NCOA4     | -0.192033333 | -0.298933333 | -0.096933333 | -0.034933333 |
| RPP14     | 0.032766667  | -0.166066667 | -0.087666667 | 0.243133333  |
| SNORA11D  | -0.192566667 | -0.235666667 | 0.0771       | 0.050666667  |
| SH3KBP1   | 0.0104       | 0.0327       | -0.042633333 | 0.108233333  |
| SNORD46   | -0.129366667 | -0.0712      | -0.080366667 | -0.0074      |
| LOC652685 | -0.310666667 | -0.3786      | -0.150933333 | -0.031266667 |
| PCDHB16   | -0.207933333 | -0.1441      | -0.140533333 | 0.140233333  |
| NBR1      | -0.0792      | -0.0375      | -0.1178      | 0.128166667  |
| ENPP1     | -0.103566667 | 0.061433333  | 0.1727       | 0.103033333  |
| ORMDL3    | -0.037766667 | -0.171       | -0.2756      | 0.003166667  |
| PGRMC2    | 0.029766667  | -0.315333333 | -0.569733333 | -0.157966667 |
| MAFG      | 0.280433333  | -0.169833333 | -0.1632      | 0.3304       |
| SF3B4     | 0.086833333  | 0.015533333  | -0.059533333 | 0.2548       |
| SRD5A1    | -0.161566667 | -0.190933333 | -0.254966667 | 0.038333333  |
| DMC1      | -0.2973      | -0.018966667 | -0.0683      | -0.037766667 |
| LOC654174 | 0.112166667  | 0.034866667  | -0.0145      | 0.311366667  |
| SPN       | -0.226233333 | -0.046566667 | -0.0706      | -0.018033333 |
| SLC41A1   | -0.125966667 | -0.175166667 | -0.286133333 | -0.036       |
| MYO6      | 0.019333333  | -0.154733333 | -0.168566667 | 0.1243       |
| INSIG2    | -0.052566667 | 0.020933333  | -0.073666667 | 0.021333333  |
| NOL7      | -0.0708      | -0.036433333 | -0.1669      | 0.053566667  |
| C17orf51  | -0.011466667 | -0.182933333 | -0.219633333 | -0.094166667 |
| ARL3      | -0.013266667 | -0.1667      | -0.142233333 | 0.112066667  |
| RFXAP     | -0.2329      | -0.269633333 | -0.1251      | 0.054933333  |
| LOC653071 | -0.304766667 | -0.096533333 | 0.028966667  | -0.018       |
| LOC400446 | -0.341066667 | 0.011033333  | -0.0905      | -0.1905      |
| ISCA1     | -0.183433333 | -0.069366667 | -0.117966667 | 0.074133333  |
| MIS12     | -0.163766667 | -0.1124      | 0.053533333  | 0.176        |
| GABRE     | 0.020133333  | -0.170533333 | -0.266066667 | 0.0444       |
| C1orf91   | -0.1351      | -0.172033333 | -0.1588      | 0.093533333  |
| TFDP1     | 0.0135       | 0.015966667  | 0.0705       | 0.265166667  |



|              |              |              |              |              |
|--------------|--------------|--------------|--------------|--------------|
| LOC651064    | -0.049233333 | -0.094766667 | 0.0227       | 0.164033333  |
| PDCD7        | -0.0586      | -0.1638      | -0.107433333 | 0.160733333  |
| ZWINT        | 0.055833333  | -0.099533333 | 0.046        | 0.229266667  |
| ANAPC11      | -0.176833333 | -0.129966667 | -0.0278      | 0.059833333  |
| LOC728772    | 0.033933333  | -0.0587      | -0.058966667 | 0.1873       |
| TNKS1BP1     | -0.055966667 | -0.073466667 | -0.223633333 | 0.123933333  |
| RUVBL1       | 0.1992       | 0.015066667  | -0.0512      | 0.286        |
| P704P        | 0.195533333  | 0.031833333  | -0.2222      | 0.342733333  |
| MYL9         | 0.183        | -0.182766667 | -0.402266667 | 0.136166667  |
| RPP40        | -0.160333333 | 0.004366667  | -0.085466667 | 0.190366667  |
| EIF5A        | -0.1318      | -0.0352      | -0.0564      | 0.153666667  |
| LYRM7        | -0.3432      | 6.67E-05     | -0.1596      | -0.039033333 |
| KIAA0232     | -0.112066667 | -0.156633333 | -0.086666667 | 0.1338       |
| CSNK2A1P     | 0.023033333  | 0.013866667  | -0.195733333 | 0.0941       |
| LOC728643    | -0.061633333 | -0.204933333 | -0.150566667 | -0.098633333 |
| KIAA0895     | -0.125       | -0.146       | -0.088433333 | 0.043333333  |
| FBXL20       | -0.323766667 | -0.2085      | -0.1646      | -0.081166667 |
| NARG1        | 0.010766667  | 0.103366667  | 0.059433333  | 0.314333333  |
| C10orf114    | -0.080366667 | -0.042       | -0.1975      | 0.008433333  |
| SAT2         | -0.2231      | -0.284833333 | -0.293966667 | -0.0176      |
| SLC31A2      | 0.071166667  | 0.054833333  | -0.1259      | 0.282766667  |
| LOC392501    | -0.390533333 | -0.0061      | -0.4973      | -0.244066667 |
| EEF1E1       | 0.112933333  | 0.1848       | -0.085       | 0.183133333  |
| LOC729421    | -0.215333333 | -0.150233333 | -0.135166667 | -0.106966667 |
| C8orf37      | -0.163066667 | 0.018866667  | -0.0493      | 0.100566667  |
| SNAPC5       | -0.223733333 | -0.186233333 | -0.065033333 | -0.016933333 |
| EIF2S1       | 0.087533333  | -0.004       | -0.051833333 | 0.2749       |
| XRCC4        | -0.159       | 0.086666667  | 0.003033333  | 0.1143       |
| CCNY         | -0.075533333 | -0.234366667 | -0.153       | 0.056333333  |
| C1orf63      | -0.164966667 | -0.531033333 | -0.262933333 | -0.2025      |
| CCDC125      | -0.244233333 | -0.007633333 | -0.072933333 | -0.070566667 |
| SLC4A5       | -0.1819      | -0.100233333 | -0.0947      | -0.200666667 |
| LOC100130332 | -0.1386      | -0.138333333 | 0.037666667  | -0.0093      |
| ALDH9A1      | -0.165233333 | -0.1265      | 0.037        | 0.1606       |
| LRRC42       | 0.0783       | -0.052333333 | -0.112       | 0.176366667  |
| TMEM106A     | -0.2495      | 0.0837       | -0.179766667 | -0.206666667 |
| WDR44        | -0.115466667 | 0.093766667  | -0.2512      | 0.015866667  |
| RAPGEF5      | -0.2151      | -0.221066667 | -0.1053      | 0.110933333  |
| SLC26A6      | -0.0868      | -0.1254      | 0.113733333  | 0.300666667  |
| KIF15        | -0.0426      | 0.0606       | -0.059433333 | 0.0427       |
| FSIP1        | -0.1024      | -0.018666667 | -0.196133333 | 0.197433333  |
| TP53AP1      | -0.415233333 | -0.145233333 | -0.143566667 | -0.127433333 |
| LOC649801    | 0.022966667  | -0.1041      | -0.116333333 | 0.065133333  |
| LOC730187    | -0.1194      | -0.218666667 | -0.050566667 | 0.0577       |
| NOC3L        | -0.050233333 | 0.241766667  | 0.133033333  | 0.333433333  |
| PHTF1        | -0.269333333 | -0.104333333 | -0.156666667 | 0.0078       |
| NBPF3        | -0.223033333 | -0.2367      | -0.224633333 | -0.135766667 |

|           |              |              |              |              |
|-----------|--------------|--------------|--------------|--------------|
| CSNK2A2   | -0.2205      | -0.164133333 | -0.284333333 | 0.025333333  |
| TMEM222   | -0.0624      | -0.141466667 | -0.173766667 | 0.1707       |
| KIAA0427  | -0.280666667 | -0.1693      | -0.290766667 | -0.278766667 |
| RNF181    | -0.1305      | -0.069733333 | -0.2339      | 0.018433333  |
| LOC644743 | -0.0185      | -0.007766667 | -0.029866667 | 0.216266667  |
| PRKCE     | -0.073466667 | -0.0317      | 0.022533333  | 0.180466667  |
| EIF5A2    | 0.011266667  | 0.054566667  | 0.159        | 0.4578       |
| ZNF274    | -0.1411      | -0.037866667 | -0.098066667 | 0.0946       |
| LOC400464 | -0.316133333 | -0.199166667 | -0.079966667 | -0.069666667 |
| CKS1B     | 0.022        | -0.012833333 | 0.081133333  | 0.246333333  |
| MRPS17    | 0.095933333  | 0.095833333  | -0.000166667 | 0.268433333  |
| SLC30A3   | -0.114133333 | -0.008866667 | -0.024366667 | 0.2223       |
| LOC646527 | -0.268133333 | -0.088333333 | -0.3509      | -0.219766667 |
| PFN4      | -0.4478      | -0.128866667 | -0.268033333 | -0.1209      |
| FLJ44124  | -0.152066667 | -0.032133333 | 0.0805       | -0.028633333 |
| LOC730176 | -0.072933333 | -0.0308      | -0.0395      | 0.181966667  |
| C7orf27   | -0.079266667 | -0.091333333 | -0.112733333 | 0.0587       |
| SULT1A1   | -0.072233333 | -0.015066667 | -0.017233333 | -0.008033333 |
| CCDC109A  | -0.1436      | -0.014433333 | -0.0812      | 0.029933333  |
| ERCC5     | -0.064733333 | -0.316366667 | -0.4782      | -0.124166667 |
| ODF2L     | -0.147033333 | 0.0355       | -0.000333333 | 0.205766667  |
| EIF3A     | -0.157533333 | -0.3071      | -0.060533333 | -0.002966667 |
| LOC646949 | -0.622366667 | -0.0558      | -0.522066667 | -0.410233333 |
| LOC650215 | -0.270233333 | -0.260633333 | -0.335766667 | -0.093366667 |
| GRB2      | 0.136666667  | 0.110133333  | -0.132666667 | 0.2684       |
| CAPN7     | -0.140233333 | -0.2078      | -0.1555      | 0.050966667  |
| IRAK1     | 0.0911       | 0.150366667  | -0.1404      | 0.285566667  |
| SCARNA18  | -0.054033333 | -0.038566667 | -0.130433333 | 0.100433333  |
| PLCL2     | -0.008833333 | -0.021133333 | -0.102366667 | 0.1477       |
| LOC442442 | -0.270833333 | 0.024866667  | -0.2132      | -0.0412      |
| TTF1      | -0.0955      | 0.046233333  | 0.094266667  | 0.133366667  |
| AMACR     | -0.0113      | -0.197       | -0.1573      | 0.003733333  |
| PTRH1     | -0.154266667 | -0.0402      | -0.1143      | 0.045033333  |
| LOC642909 | -0.091233333 | 0.1414       | -0.1451      | 0.0699       |
| KLHDC10   | -0.124       | -0.066533333 | -0.157933333 | 0.102566667  |
| SPSB3     | -0.3391      | -0.2687      | -0.382       | -0.1324      |
| PIGT      | -0.198966667 | -0.360766667 | -0.1887      | 0.1026       |
| C1orf107  | -0.045366667 | -0.1546      | -0.275233333 | 0.075466667  |
| CKS2      | 0.077066667  | 0.088433333  | 0.0827       | 0.234533333  |
| SRP68     | -0.052966667 | -0.069433333 | -0.0805      | 0.057233333  |
| MIR557    | -0.010933333 | -0.183333333 | -0.0236      | 0.128266667  |
| LOC729409 | -0.032733333 | 0.032833333  | -0.0882      | 0.182666667  |
| USP8      | -0.202266667 | -0.210466667 | -0.135633333 | -0.0055      |
| SLC7A6    | 0.1551       | -0.156166667 | -0.1456      | 0.272533333  |
| PI4K2B    | 0.004333333  | -0.037933333 | -0.099833333 | 0.024733333  |
| CFLAR     | -0.0367      | -0.141266667 | -0.1215      | 0.0981       |
| MSH3      | -0.3125      | -0.122166667 | -0.115366667 | -0.130766667 |

|              |              |              |              |              |
|--------------|--------------|--------------|--------------|--------------|
| C3orf71      | -0.4215      | -0.476266667 | -0.452333333 | -0.240233333 |
| DALRD3       | -0.236933333 | -0.161033333 | -0.164833333 | 0.019        |
| LOC441481    | -0.009766667 | 0.080866667  | -0.1164      | 0.084566667  |
| C21orf24     | -0.106266667 | -0.0299      | 0.218133333  | 0.1792       |
| LOC100129708 | -0.155733333 | -0.044333333 | 0.057433333  | 0.209066667  |
| ERAL1        | -0.046533333 | 0.0449       | -0.121366667 | 0.275833333  |
| NAT9         | -0.209166667 | -0.158266667 | -0.146933333 | 0.052033333  |
| EPM2AIP1     | -0.1698      | -0.192133333 | -0.1703      | 0.032333333  |
| TTC4         | 0.179933333  | 0.133466667  | -0.220466667 | 0.2575       |
| C5orf5       | -0.143066667 | -0.214466667 | -0.336033333 | -0.0331      |
| SURF1        | -0.303466667 | -0.2519      | -0.153933333 | -0.069866667 |
| MSL3L1       | -0.0434      | 0.017833333  | -0.128766667 | 0.083066667  |
| LOC729198    | -0.020033333 | -0.010666667 | -0.116533333 | 0.1435       |
| SRFBP1       | -0.050566667 | 0.169133333  | -0.058833333 | 0.197        |
| RDBP         | -0.013033333 | 0.033666667  | -0.1588      | 0.104766667  |
| UBE3B        | -0.313466667 | -0.1065      | -0.124666667 | -0.0698      |
| MAP2K4       | -0.143966667 | -0.004766667 | -0.0912      | 0.160633333  |
| CARD11       | -0.167433333 | -0.093966667 | -0.1035      | 0.052066667  |
| SGPL1        | -0.048733333 | -0.151566667 | -0.250166667 | 0.024566667  |
| LOC100129668 | -0.072633333 | -0.040933333 | 0.0472       | 0.2687       |
| HIST1H4K     | -0.0133      | -0.186066667 | 0.145466667  | 0.0706       |
| SACM1L       | -0.1628      | -0.1074      | -0.022133333 | 0.026966667  |
| MCCC2        | -0.030933333 | 0.001066667  | -0.076666667 | 0.1017       |
| FAM53C       | -0.105033333 | -0.2339      | -0.035633333 | 0.061833333  |
| MORC2        | -0.1999      | 0.1338       | -0.0924      | 0.097733333  |
| C17orf81     | -0.0733      | -0.058766667 | -0.159633333 | 0.079566667  |
| TMEM39A      | 0.021466667  | 0.0376       | -0.2129      | 0.132133333  |
| WBP2         | -0.3809      | -0.3082      | -0.046133333 | -0.040133333 |
| CTGF         | 2.1672       | 0.6871       | -0.2223      | 1.303733333  |
| NLK          | -0.097733333 | -0.185066667 | -0.163866667 | -0.026933333 |
| CUL4A        | -0.094333333 | -0.0071      | -0.057366667 | 0.1714       |
| TTLL7        | -0.0041      | -0.049166667 | -0.268166667 | 0.115166667  |
| ZFP1         | -0.218166667 | -0.083466667 | -0.126633333 | -0.026366667 |
| VPS39        | -0.179533333 | -0.125966667 | -0.311933333 | 0.016333333  |
| APBB3        | -0.504266667 | -0.4499      | -0.183366667 | -0.2428      |
| LOC648705    | -0.048766667 | -0.1391      | 0.030766667  | 0.1251       |
| LOC729298    | 0.0027       | 0.157466667  | -0.021366667 | 0.327433333  |
| HIP2         | 0.032533333  | -0.057866667 | -0.072466667 | 0.218133333  |
| NEK1         | -0.374533333 | -0.1798      | -0.273833333 | -0.101333333 |
| MAPKAPK5     | 0.091566667  | -0.036933333 | -0.1673      | 0.200733333  |
| DAP3         | 0.018666667  | -0.128733333 | -0.061466667 | 0.1221       |
| LOC727751    | -0.247866667 | -0.088566667 | -0.140266667 | 0.001766667  |
| EEF1B2       | -0.168133333 | -0.080933333 | -0.263       | -0.103233333 |
| ATXN10       | -0.2308      | -0.138766667 | 0.084833333  | 0.125466667  |
| SAMD8        | 0.0624       | -0.0011      | -0.0947      | 0.268333333  |
| KBTBD8       | 0.440333333  | 0.050833333  | 0.426066667  | 0.712333333  |
| BOK          | -0.080833333 | -0.189933333 | -0.1625      | 0.060233333  |

|           |              |              |              |              |
|-----------|--------------|--------------|--------------|--------------|
| MRPL42    | 0.0535       | 0.1616       | -0.1934      | 0.138266667  |
| LOC728554 | 0.098033333  | -0.033166667 | -0.119366667 | 0.071566667  |
| SNORD73A  | -0.029866667 | 0.011033333  | -0.074266667 | 0.091033333  |
| OTUD5     | -0.036366667 | -0.1957      | -0.155033333 | 0.081633333  |
| UCN       | -0.115766667 | -0.2915      | -0.1243      | 0.0302       |
| C9orf89   | 0.0074       | -0.1097      | -0.08        | 0.154466667  |
| LOC730063 | -0.2227      | -0.064533333 | -0.226133333 | -0.049433333 |
| PRKRIP1   | -0.039866667 | -0.294166667 | -0.320033333 | 0.056933333  |
| SNORA84   | -0.1754      | -0.196633333 | 0.008366667  | -0.050133333 |
| NRM       | -0.108233333 | 0.118766667  | 0.0567       | 0.138966667  |
| GGPS1     | -0.2374      | -0.240733333 | -0.073066667 | 0.106933333  |
| ZNF33A    | -0.0189      | -0.2307      | -0.0881      | 0.160766667  |
| ATRIP     | 0.126133333  | 0.019        | -0.039633333 | 0.313733333  |
| RBBP5     | -0.153733333 | 0.028833333  | -0.06        | 0.076866667  |
| WASH2P    | -0.113166667 | -0.1034      | -0.0999      | 0.0659       |
| STX8      | -0.214533333 | -0.199633333 | -0.0819      | -0.022766667 |
| SMAP1     | -0.2457      | -0.1419      | -0.3708      | -0.0386      |
| AFF4      | -0.018266667 | -0.342733333 | -0.031533333 | 0.058533333  |
| C9orf90   | -0.188633333 | -0.140333333 | -0.106833333 | -0.0037      |
| NEK6      | 0.080033333  | -0.0056      | -0.253433333 | 0.1918       |
| TCF19     | -0.034466667 | -0.064933333 | 0.0071       | 0.194266667  |
| LOC728895 | -0.139166667 | -0.085166667 | -0.1142      | -0.081533333 |
| SYDE1     | 0.370633333  | -0.033733333 | -0.140566667 | 0.433266667  |
| RABAC1    | -0.205266667 | -0.200666667 | -0.4491      | -0.111733333 |
| TMEM41A   | 0.155066667  | -0.072966667 | -0.0597      | 0.284833333  |
| PERP      | -0.1312      | -0.0953      | -0.1906      | 0.0331       |
| CCDC55    | 0.063366667  | -0.055166667 | 0.023266667  | 0.189366667  |
| TMEM54    | -0.1967      | -0.238066667 | -0.338433333 | -0.066633333 |
| TCERG1    | 0.049866667  | 0.133166667  | 0.166233333  | 0.378033333  |
| STK4      | -0.090333333 | -0.1753      | 0.059966667  | 0.0556       |
| ZNF583    | -0.038033333 | 0.035466667  | -0.1709      | 0.219666667  |
| SLC16A5   | -0.2208      | -0.2614      | -0.1449      | 0.015133333  |
| LOC728782 | -0.0984      | -0.113833333 | -0.2403      | 0.003566667  |
| USF1      | 0.144533333  | -0.162966667 | -0.165566667 | 0.201266667  |
| BRF2      | -0.127333333 | -0.218133333 | -0.4936      | -0.019033333 |
| LOC649946 | -0.312866667 | -0.083033333 | -0.1641      | -0.100433333 |
| SUMO3     | -0.015333333 | -0.065533333 | -0.0785      | 0.0377       |
| PMS2CL    | -0.258566667 | -0.085233333 | -0.116233333 | 0.045866667  |
| TES       | -0.0285      | -0.0222      | -0.203433333 | -0.017333333 |
| CCNO      | -0.2116      | -0.3112      | -0.089933333 | 0.034266667  |
| AIDA      | -0.113       | 0.0017       | -0.305433333 | 0.039366667  |
| JARID1A   | -0.170966667 | -0.099233333 | -0.138266667 | 0.010133333  |
| LOC649049 | -0.2874      | -0.2445      | -0.0509      | -0.0161      |
| TRIM21    | 0.0003       | -0.082366667 | -0.1124      | 0.2515       |
| DNAJC5    | 0.121133333  | -0.011833333 | -0.1073      | 0.141866667  |
| MAGEA6    | 0.136266667  | -0.081633333 | 0.044633333  | 0.230866667  |
| LOC440043 | 0.072166667  | 0.046566667  | -0.144533333 | 0.1798       |

|           |              |              |              |              |
|-----------|--------------|--------------|--------------|--------------|
| KIAA0947  | -0.1194      | -0.0643      | -0.172666667 | 0.0942       |
| C7orf20   | 0.0668       | -0.096366667 | -0.031433333 | 0.231133333  |
| CKB       | -0.0646      | -0.0699      | -0.075633333 | 0.104        |
| PSMD8     | 0.034966667  | -0.042233333 | -0.110933333 | 0.118266667  |
| ST3GAL1   | -0.154033333 | -0.098566667 | 0.203366667  | 0.193        |
| LOC651202 | -0.380966667 | -0.009166667 | -0.142866667 | -0.058733333 |
| RUFY1     | -0.1576      | -0.1476      | -0.252333333 | 0.0597       |
| ADRM1     | 0.125166667  | 0.038633333  | -0.044466667 | 0.262866667  |
| LYPLAL1   | -0.3539      | -0.2649      | -0.0053      | -0.161233333 |
| FLJ22795  | -0.199133333 | -0.099033333 | -0.1761      | -0.047066667 |
| TSEN34    | -0.0711      | -0.1196      | -0.104633333 | 0.1598       |
| KIAA1530  | -0.050466667 | -0.074166667 | -0.1489      | 0.005566667  |
| MIF4GD    | -0.429566667 | -0.254666667 | -0.192366667 | -0.094766667 |
| LOC643313 | -0.296       | 0.000766667  | -0.152       | -0.033433333 |
| C21orf51  | -0.2342      | -0.1461      | -0.3058      | -0.110766667 |
| KCTD10    | 0.2764       | -0.1096      | -0.113933333 | 0.231633333  |
| WHAMM     | 0.0759       | -0.031066667 | -0.006133333 | 0.094333333  |
| UBE2Z     | -0.1637      | -0.02        | 0.013466667  | 0.079333333  |
| ZNF483    | -0.391433333 | 0.039566667  | 0.005866667  | -0.146833333 |
| MSL3      | -0.0356      | -0.0293      | -0.171566667 | 0.1882       |
| TMEM62    | 0.029633333  | -0.098533333 | -0.301866667 | 0.114766667  |
| N4BP1     | -0.1778      | -0.1109      | -0.2202      | -0.043966667 |
| PIP5K2B   | -0.281066667 | 0.0582       | 0.217266667  | 0.010066667  |
| KCNJ2     | -0.114       | -0.078266667 | -0.106066667 | 0.1183       |
| SLCO3A1   | 0.004866667  | -0.055966667 | -0.1832      | 0.1572       |
| PDE7A     | -0.0572      | -0.104366667 | 0.065833333  | 0.205966667  |
| LOC440704 | -0.235566667 | 0.013066667  | -0.0433      | -0.014166667 |
| SLC15A3   | 0.052833333  | -0.1259      | -0.129033333 | 0.329966667  |
| EML1      | 0.041966667  | -0.123366667 | -0.4265      | 0.119966667  |
| ARID4B    | -0.209633333 | -0.0618      | -0.047466667 | 0.009566667  |
| ZNF746    | -0.0436      | -0.085966667 | -0.107833333 | 0.2039       |
| SNX21     | -0.104566667 | -0.187333333 | -0.192866667 | 0.072966667  |
| CCDC99    | 0.2213       | 0.113766667  | 0.1351       | 0.349066667  |
| HNRPH3    | -0.2069      | -0.104533333 | 0.0727       | -0.0752      |
| PRAF2     | -0.182733333 | -0.198566667 | -0.108166667 | -0.075266667 |
| SKIV2L2   | -0.010566667 | 0.069666667  | -0.047433333 | 0.1562       |
| LOC646817 | -0.0243      | -0.149033333 | 0.017033333  | 0.104266667  |
| CEP63     | -0.196766667 | -0.1245      | -0.283466667 | 0.063866667  |
| FBXO5     | 0.147166667  | 0.268766667  | 0.2365       | 0.2865       |
| PEF1      | -0.159633333 | -0.240033333 | -0.161933333 | -0.0369      |
| LIN37     | -0.0003      | -0.173033333 | -0.2076      | 0.0734       |
| LOC642828 | -0.0847      | -0.097866667 | -0.2508      | -0.028433333 |
| RNF4      | 0.154633333  | 0.0461       | -0.020133333 | 0.3547       |
| BCAT1     | 0.097        | -0.082233333 | -0.359266667 | 0.125266667  |
| NAE1      | -0.159533333 | 0.0733       | -0.078233333 | 0.0773       |
| ZNF484    | -0.1258      | -0.094166667 | -0.030266667 | 0.1487       |
| KIAA0368  | -0.219766667 | -0.065933333 | -0.252033333 | -0.009933333 |

|              |              |              |              |              |
|--------------|--------------|--------------|--------------|--------------|
| LARP1        | -0.055933333 | -0.136933333 | -0.053366667 | 0.097833333  |
| AKR1C2       | -0.4779      | -0.1804      | 0.072666667  | -0.005933333 |
| COG8         | -0.1812      | -0.010933333 | -0.137466667 | 0.153233333  |
| ALKBH6       | 0.0569       | -0.035266667 | 0.0179       | 0.202133333  |
| RAB11A       | -0.2238      | -0.2466      | -0.050533333 | 0.0645       |
| LOC100132774 | 0.104933333  | 0.328        | 0.062533333  | 0.204066667  |
| LOC100128729 | -0.17        | -0.0442      | -0.0457      | 0.050666667  |
| USP15        | -0.092633333 | -0.1391      | -0.167033333 | 0.078033333  |
| EIF2S3       | -0.218733333 | -0.186333333 | -0.160033333 | 0.029766667  |
| ZNF614       | -0.061266667 | 0.132533333  | 0.004833333  | 0.1508       |
| LOC728877    | -0.104233333 | -0.2134      | -0.1138      | -0.0166      |
| DGKQ         | -0.157333333 | -0.271166667 | -0.329666667 | -0.0288      |
| EID1         | -0.0859      | -0.2111      | -0.131233333 | -0.018033333 |
| LBA1         | -0.0892      | -0.106366667 | -0.0026      | 0.1032       |
| FBXW8        | -0.234       | -0.206666667 | -0.110433333 | -0.1035      |
| SLC39A7      | -0.055166667 | -0.166866667 | -0.134333333 | 0.128333333  |
| HHAT         | 0.049366667  | -0.134433333 | -0.0736      | 0.177066667  |
| UBN2         | -0.1733      | -0.090333333 | -0.066966667 | 0.0796       |
| NEU1         | -0.326866667 | -0.265366667 | -0.0726      | -1.00E-04    |
| CSE1L        | 0.290166667  | 0.059933333  | -0.176066667 | 0.298833333  |
| SNRPB        | 0.006266667  | 0.065266667  | -0.166866667 | 0.199533333  |
| ZNF10        | -0.068733333 | -0.2274      | -0.1486      | 0.061566667  |
| LOC100128888 | -0.194166667 | -0.0028      | -0.2408      | 0.0513       |
| MED31        | -0.006666667 | 0.010933333  | 0.006466667  | 0.179533333  |
| RPL23AP13    | -0.369033333 | -0.236366667 | -0.376333333 | -0.117933333 |
| UBA7         | -0.258533333 | -0.243333333 | -0.201       | -0.1         |
| HSPBAP1      | -0.411633333 | -0.289733333 | -0.065133333 | 0.035666667  |
| ZCCHC7       | -0.395066667 | -0.228033333 | -0.184833333 | -0.1791      |
| HIBADH       | -0.5109      | -0.248866667 | 0.039066667  | -0.221366667 |
| NSF          | -0.041366667 | -0.080066667 | -0.036066667 | 0.1143       |
| LOC100129067 | -0.394966667 | -6.67E-05    | -0.4496      | -0.269333333 |
| JMJD2B       | -0.113566667 | 0.0096       | -0.221133333 | 0.057066667  |
| PHF21A       | -0.415033333 | -0.4517      | -0.3484      | -0.335533333 |
| CSTF3        | -0.1725      | 0.038533333  | 0.105666667  | -0.0005      |
| PARP4        | -0.013366667 | -0.044633333 | -0.056066667 | 0.188266667  |
| OCIAD1       | -0.163066667 | -0.090666667 | 0.068566667  | -0.076766667 |
| LOC440927    | -0.133866667 | -0.219133333 | -0.225566667 | 0.1346       |
| LOC439953    | -0.017133333 | 0.0382       | -0.021       | 0.1233       |
| PLXNB2       | 0.124333333  | -0.0999      | -0.307933333 | 0.1288       |
| FTSJD2       | -0.153466667 | -0.124333333 | 0.0021       | 0.0949       |
| C2orf32      | -0.1614      | 0.051533333  | 0.078733333  | 0.040333333  |
| BAT2         | 0.0798       | 0.030433333  | -0.0828      | 0.142366667  |
| CREM         | -0.121466667 | 0.0676       | -0.062033333 | 0.041666667  |
| CROT         | -0.341533333 | -0.084833333 | -0.021633333 | 0.010066667  |
| ARPC5        | -0.0816      | -0.044666667 | -0.086833333 | 0.1661       |
| TICAM1       | 0.181566667  | -0.033633333 | -0.028733333 | 0.3669       |
| CLPTM1L      | -0.039       | -0.0859      | -0.108266667 | 0.1871       |

|              |              |              |              |              |
|--------------|--------------|--------------|--------------|--------------|
| GDI2         | -0.1627      | -0.164266667 | -0.183666667 | 0.027333333  |
| CCNG2        | -0.243733333 | -0.449766667 | -0.190833333 | -0.0991      |
| PLAA         | 0.043366667  | -0.0148      | -0.094933333 | 0.2993       |
| LOC652904    | 0.0466       | 0.067966667  | -0.091133333 | 0.1795       |
| RBM6         | 0.0594       | -0.073233333 | -0.118733333 | 0.124533333  |
| ZNF717       | -0.19        | -0.184166667 | -0.058333333 | -0.003966667 |
| CMPK1        | -0.074233333 | -0.2037      | -0.272566667 | -0.016966667 |
| UBE2G1       | 0.167433333  | 0.012733333  | -0.077833333 | 0.203933333  |
| RPAP2        | -0.2314      | -0.108866667 | -0.0929      | 0.071166667  |
| TBC1D8B      | -0.3113      | -0.112033333 | -0.2783      | -0.124833333 |
| LAPTM4A      | -0.262366667 | -0.216033333 | -0.324866667 | -0.147666667 |
| CYP4V2       | -0.372933333 | -0.099366667 | 0.002166667  | -0.008766667 |
| FCF1         | -0.080366667 | 0.085966667  | -0.187666667 | 0.145433333  |
| C1orf77      | 0.0908       | -0.000966667 | 0.0012       | 0.137466667  |
| WIBG         | -0.009466667 | -0.0558      | -0.130966667 | 0.084133333  |
| TMF1         | -0.003866667 | -0.1496      | -0.248233333 | 0.0048       |
| DENR         | -0.280833333 | -0.0053      | 0.0706       | -0.200333333 |
| VGLL4        | -0.164266667 | -0.169133333 | -0.117566667 | 0.1567       |
| LOC100130070 | -0.3975      | -0.247       | -0.213666667 | -0.119833333 |
| LOC653086    | -0.206866667 | 0.019733333  | -0.016933333 | -0.001566667 |
| RPS10P3      | -0.0618      | -0.252066667 | -0.149033333 | 0.096233333  |
| CCDC56       | -0.0844      | 0.005233333  | -0.086866667 | 0.1907       |
| ENTPD4       | -0.1881      | 0.096866667  | -0.0873      | -0.132066667 |
| LOC145853    | -0.243433333 | -0.263       | -0.086433333 | -0.085966667 |
| TMEM43       | 0.020433333  | -0.016233333 | -0.439966667 | -0.0398      |
| SYTL4        | -0.0722      | -0.0361      | -0.086933333 | 0.132333333  |
| DUSP12       | 0.082966667  | -0.134266667 | -0.231366667 | 0.203266667  |
| RNF5P1       | -0.117666667 | -0.167766667 | -0.083       | -0.0518      |
| PDLIM4       | -0.041066667 | 0.072066667  | 0.2236       | 0.452666667  |
| YY1AP1       | -0.108766667 | -0.147033333 | -0.0758      | 0.120133333  |
| LOC645968    | -0.412266667 | -0.156666667 | -0.046066667 | -0.110966667 |
| LOC651143    | -0.0272      | -0.135466667 | -0.041033333 | 0.098133333  |
| MRPS2        | 0.0973       | 0.0074       | -0.018033333 | 0.234366667  |
| ACER3        | 0.1318       | -0.043633333 | -0.1462      | 0.2247       |
| LOC649076    | -0.102133333 | -0.012966667 | -0.122033333 | 0.153533333  |
| ANXA2        | 0.4695       | 0.119733333  | -0.679933333 | 0.241333333  |
| TMED9        | -0.1095      | -0.094133333 | -0.3252      | 0.029333333  |
| TERC         | -0.131466667 | 0.062733333  | -0.253366667 | -0.048066667 |
| TRIP6        | 0.046266667  | -0.0385      | -0.389366667 | 0.080433333  |
| USP14        | -0.128766667 | -0.115566667 | -0.0965      | 0.0451       |
| LOC391825    | -0.3128      | -0.075933333 | -0.345233333 | -0.1069      |
| PEX13        | 0.1075       | -0.120166667 | -0.052733333 | 0.221666667  |
| LOC729021    | -0.203333333 | -0.059566667 | -0.0673      | 0.0377       |
| ZBTB43       | -0.224533333 | -0.022966667 | 0.1179       | 0.192966667  |
| NOL8         | -0.212566667 | -0.032666667 | -0.224066667 | -0.001666667 |
| HN1          | 0.1185       | 0.048066667  | 0.027233333  | 0.181433333  |
| WBP1         | -0.344766667 | -0.2084      | -0.126566667 | -0.050766667 |

|              |              |              |              |              |
|--------------|--------------|--------------|--------------|--------------|
| PNKD         | 0.005        | -0.0566      | 0.106666667  | 0.237166667  |
| LOC731950    | -0.191033333 | -0.146666667 | -0.2985      | -0.069266667 |
| CCNT1        | -0.0786      | 0.1213       | 0.051466667  | 0.296533333  |
| GFPT1        | -0.0492      | -0.174233333 | -0.487333333 | -0.004666667 |
| DPM3         | -0.395333333 | -0.1315      | 0.038333333  | -0.075133333 |
| LOC100129139 | -0.3018      | 0.143766667  | -0.3521      | -0.072933333 |
| LOC651772    | -0.154266667 | -0.101366667 | -0.2272      | -0.183       |
| LOC389322    | -0.156833333 | 0.095666667  | -0.126733333 | 0.014166667  |
| STK40        | -0.0988      | -0.0098      | -0.045666667 | 0.1048       |
| LRRC8E       | 0.027566667  | -0.1806      | -0.030133333 | 0.081033333  |
| RIT1         | 0.084133333  | -0.096266667 | -0.047433333 | 0.277133333  |
| EDC4         | 0.0807       | -0.043266667 | -0.0906      | 0.185        |
| LOC442582    | -0.036433333 | -0.209       | 0.0638       | 0.140166667  |
| LOC100134537 | 0.0394       | -0.214833333 | -0.165033333 | -0.041366667 |
| LOC652903    | 0.161166667  | 0.010933333  | -0.086933333 | 0.184933333  |
| LOC729692    | 0.124233333  | -0.074566667 | -0.098233333 | 0.074033333  |
| TELO2        | -0.033133333 | 0.014866667  | 0.370966667  | 0.3775       |
| LOC727962    | -0.075266667 | 0.0118       | -0.1774      | -0.016233333 |
| LOC387791    | -0.078433333 | -0.136233333 | -0.1593      | -0.043166667 |
| PSCD2        | 0.131        | -0.2421      | -0.223366667 | 0.2009       |
| NUP37        | 0.0039       | 0.0111       | -0.117666667 | 0.175666667  |
| LOC388556    | -0.323133333 | -0.3887      | -0.094133333 | -0.0769      |
| CRIPAK       | -0.1515      | -0.096333333 | -0.105133333 | -0.094066667 |
| NAMPT        | 0.0783       | 0.0604       | -0.008766667 | 0.128266667  |
| LRCH3        | -0.0042      | -0.036366667 | -0.082666667 | 0.1054       |
| CUL7         | -0.1846      | -0.261233333 | -0.1305      | -0.1336      |
| RNF7         | -0.006166667 | -0.0746      | -0.190966667 | 0.059866667  |
| SNORA45      | 0.059366667  | 0.085933333  | -0.068766667 | 0.2214       |
| TRIM23       | -0.112433333 | -0.0218      | -0.076666667 | 0.1513       |
| RAD51        | -0.337066667 | -0.008       | -0.2964      | -0.2018      |
| LOC730358    | -0.185866667 | -0.156033333 | 0.0259       | 0.0639       |
| SLFN12       | 0.188633333  | -0.1235      | -0.066033333 | 0.1704       |
| DDX23        | -0.101       | 0.047733333  | -0.001266667 | 0.155833333  |
| LOC645094    | 0.202266667  | -0.061766667 | -0.142966667 | 0.172166667  |
| MAPK14       | -0.1437      | -0.1733      | 0.099233333  | 0.060833333  |
| CSAG3A       | -0.243366667 | -0.243       | -0.136133333 | -0.133533333 |
| HIVEP2       | 0.082966667  | -0.1829      | 0.073966667  | 0.339466667  |
| LOC100133372 | 0.033166667  | -0.3561      | 0.002133333  | -0.0226      |
| RAB3GAP2     | -0.0905      | -0.273966667 | -0.203533333 | -0.0172      |
| SPCS1        | -0.084       | -0.031533333 | -0.0696      | 0.049233333  |
| C1orf35      | -0.042866667 | 0.0014       | -0.061066667 | 0.205833333  |
| CST7         | -0.075866667 | 0.0149       | -0.1615      | 0.012233333  |
| LOC100130633 | -0.1637      | -0.080033333 | -0.087       | -0.057233333 |
| LOC147804    | 0.135833333  | -0.1494      | -0.112533333 | 0.225233333  |
| RABL4        | -0.171033333 | -0.132266667 | -0.229433333 | 0.064        |
| NEDD8        | 0.190433333  | -0.053866667 | 0.1148       | 0.206266667  |
| C21orf55     | -0.173933333 | -0.003366667 | 0.0312       | -0.056766667 |



|              |              |              |              |              |
|--------------|--------------|--------------|--------------|--------------|
| LOC642489    | 0.2761       | -0.0532      | -0.12        | 0.257533333  |
| BHLHB9       | -0.2675      | -0.1749      | -0.164233333 | -0.085366667 |
| PITRM1       | -0.036666667 | 0.096033333  | -0.1447      | 0.0954       |
| SLC48A1      | -0.239633333 | -0.1247      | -0.046633333 | -0.023133333 |
| IER2         | 0.3924       | -0.167866667 | 0.091366667  | 0.1909       |
| ABHD14B      | -0.187666667 | -0.200933333 | -0.168733333 | -0.0765      |
| TK2          | -0.040133333 | -0.1077      | -0.2002      | 0.043566667  |
| FBXL15       | -0.2529      | -0.1521      | -0.178833333 | -0.063166667 |
| TBC1D10B     | 0.0923       | -0.009133333 | -0.096633333 | 0.188433333  |
| MED13        | -0.155666667 | 0.060966667  | 0.029333333  | 0.071333333  |
| GGH          | -0.335133333 | -0.1684      | -0.185966667 | -0.0864      |
| MAGEA2       | 0.0709       | -0.164066667 | -0.074533333 | 0.087        |
| FLJ20674     | 0.004566667  | -0.0374      | -0.067266667 | 0.118233333  |
| KDELR1       | -0.1359      | -0.179533333 | -0.2462      | -0.033033333 |
| ZNF195       | -0.098233333 | -0.2324      | -0.094666667 | 0.1136       |
| LOC136143    | -0.141333333 | -0.246233333 | -0.101366667 | 0.0163       |
| PCBD1        | -0.366966667 | 0.033733333  | -0.043333333 | -0.011933333 |
| TMEM129      | -0.178266667 | -0.2946      | -0.0578      | 0.049366667  |
| DCP1A        | 0.0019       | -0.076033333 | -0.038       | 0.157666667  |
| SHFM1        | 0.101266667  | -0.046166667 | -0.127933333 | 0.149433333  |
| P4HB         | -0.174233333 | -0.1265      | -0.285066667 | -0.028166667 |
| ARHGAP24     | -0.355133333 | -0.209733333 | -0.1819      | -0.118966667 |
| COX6A1       | -0.249666667 | -0.063133333 | -0.1329      | 0.0835       |
| SFXN5        | -0.070066667 | -0.084666667 | -0.0688      | 0.0121       |
| NDEL1        | 0.149        | -0.140366667 | -0.203133333 | 0.129666667  |
| LOC648283    | 0.020133333  | -0.1643      | -0.040066667 | 0.156933333  |
| CCND1        | 0.127966667  | 0.386933333  | 0.361166667  | 0.329066667  |
| KIAA1751     | -0.1655      | 0.237733333  | 0.2978       | 0.189633333  |
| SNHG11       | -0.1292      | -0.1818      | -0.236766667 | 0.154033333  |
| LOC100131787 | -0.299033333 | -0.162966667 | -0.199166667 | -0.037033333 |
| PEX11B       | -0.175533333 | -0.415366667 | -0.188933333 | -0.1065      |
| LOC728825    | -0.0285      | -0.087233333 | 0.064466667  | 0.1625       |
| PIBF1        | -0.086666667 | -0.024766667 | -0.197533333 | -0.1122      |
| OSBPL3       | 0.232466667  | 0.108966667  | -0.093766667 | 0.151333333  |
| VPS37A       | 0.153966667  | -0.0124      | -0.079666667 | 0.1722       |
| SCAND2       | -0.261       | -0.0606      | -0.123933333 | -0.015366667 |
| LOC653972    | 0.045833333  | -0.051066667 | -0.0632      | 0.110233333  |
| SPTAN1       | -0.1786      | -0.176233333 | -0.101466667 | -0.017733333 |
| TYW1         | -0.0634      | -0.154733333 | -0.134533333 | -0.053466667 |
| DEM1         | -0.1528      | 0.0851       | 0.071933333  | -0.0537      |
| LOC100129550 | -0.264733333 | -0.264133333 | -0.155133333 | -0.043433333 |
| TSG101       | -0.102366667 | -0.2133      | -0.142833333 | 0.0121       |
| PCDHB9       | -0.280933333 | 0.056333333  | -0.036366667 | -0.2361      |
| LMOD3        | -0.339333333 | 0.063666667  | -0.035766667 | -0.185533333 |
| LOC441455    | -0.2237      | -0.277133333 | -0.104366667 | 0.050566667  |
| LOC728945    | -0.057666667 | -0.221666667 | 0.014533333  | 0.193566667  |
| LOC100131980 | -0.061366667 | -0.188533333 | 0.034333333  | 0.241666667  |

|              |              |              |              |              |
|--------------|--------------|--------------|--------------|--------------|
| MAST2        | 0.0031       | 0.069933333  | -0.125933333 | 0.185066667  |
| MUT          | -0.482033333 | -0.2315      | -0.1013      | -0.158933333 |
| RNF6         | 0.094966667  | -0.109533333 | -0.109366667 | 0.255433333  |
| ABL2         | 0.2627       | 0.112233333  | -0.011933333 | 0.250933333  |
| BCL10        | 0.123966667  | -0.1647      | -0.031666667 | 0.218566667  |
| SFRS18       | -0.0141      | -0.2132      | -0.134366667 | 0.0546       |
| LOC643873    | -0.329066667 | -0.2547      | 0.002        | -0.1177      |
| CCDC123      | -0.059866667 | 0.023666667  | -0.1302      | 0.116333333  |
| RB1          | -0.024233333 | -0.097433333 | 0.043533333  | 0.079433333  |
| PSCD1        | -0.031766667 | -0.1165      | -0.098033333 | 0.195433333  |
| NPAL3        | -0.271733333 | 0.0735       | 0.072766667  | 0.051533333  |
| C1orf151     | -0.1491      | -0.085633333 | -0.024433333 | 0.0449       |
| C15orf40     | -0.041233333 | -0.1238      | -0.277833333 | 0.0006       |
| LOC130773    | -0.100533333 | -0.157166667 | -0.094166667 | -0.0635      |
| TDRD1        | -0.092833333 | 0.085066667  | -0.122       | 0.066666667  |
| CHPF         | 0.0439       | -0.1469      | -0.467466667 | 0.022733333  |
| STAU2        | -0.2336      | -0.120966667 | -0.227166667 | -0.0945      |
| RNF20        | -0.213466667 | -0.2054      | -0.206833333 | -0.1026      |
| WSB1         | 0.002833333  | -0.337333333 | -0.1971      | 0.020333333  |
| JAZF1        | 0.032133333  | -0.117266667 | -0.163       | 0.0586       |
| SLC30A9      | -0.289633333 | -0.0704      | -0.145333333 | -0.0839      |
| MOBK12A      | -0.0375      | -0.0715      | -0.094766667 | 0.075366667  |
| C16orf63     | 0.007233333  | 0.027066667  | -0.091866667 | 0.238833333  |
| LOC100133773 | -0.4895      | -0.0173      | -0.4763      | -0.2471      |
| LOC728739    | 0.0116       | 0.029166667  | -0.091966667 | 0.173033333  |
| NF2          | 0.3892       | 0.1561       | -0.099933333 | 0.293133333  |
| PPOX         | -0.444366667 | -0.2411      | -0.020233333 | -0.141233333 |
| C19orf48     | -0.028733333 | -0.0039      | 0.066433333  | 0.136        |
| LOC728779    | -0.1362      | -0.164833333 | 0.017133333  | -0.034733333 |
| NKIRAS2      | -0.120233333 | -0.129533333 | -0.1169      | 0.065133333  |
| DDX19B       | -0.040333333 | -0.1358      | -0.088466667 | 0.180766667  |
| LRCH4        | -0.014866667 | -0.134466667 | -0.031366667 | 0.016133333  |
| ZNF565       | -0.122433333 | -0.148833333 | -0.151733333 | 0.1331       |
| LOC645452    | -0.213433333 | 0.064966667  | 0.048266667  | -0.021933333 |
| LOC642017    | -0.0833      | -0.0917      | -0.034966667 | 0.1576       |
| FAM36A       | 0.0481       | -0.140066667 | 6.67E-05     | 0.175866667  |
| HYDIN        | 0.066866667  | -0.139166667 | -0.1069      | 0.159166667  |
| FLI1         | 0.131666667  | 0.0115       | 0.017666667  | 0.1882       |
| HLA-A        | -0.253933333 | -0.280766667 | -0.184766667 | -0.0326      |
| LOC730060    | -0.2805      | 0.161766667  | -0.166833333 | -0.1113      |
| CSAG3B       | -0.1903      | -0.328933333 | -0.171333333 | -0.139266667 |
| PDSS2        | -0.1928      | -0.1994      | -0.3045      | 0.0401       |
| LOC644124    | 0.0354       | -0.147333333 | 0.0088       | 0.139366667  |
| EIF3B        | 0.0304       | -0.094133333 | -0.037233333 | 0.1948       |
| MRPL17       | -0.112133333 | 0.0828       | -0.0336      | 0.139433333  |
| SGOL1        | 0.088333333  | -0.001433333 | -0.058966667 | 0.179266667  |
| SEMA7A       | -0.1447      | 0.0367       | -0.073066667 | 0.175266667  |

|              |              |              |              |              |
|--------------|--------------|--------------|--------------|--------------|
| C16orf56     | 0.1285       | 0.042966667  | -0.143166667 | 0.208266667  |
| LOC88523     | -0.3732      | -0.338       | -0.176833333 | -0.148166667 |
| LOC100129657 | -0.254333333 | -0.173366667 | -0.212166667 | -0.170433333 |
| GOLGA5       | -0.0936      | -0.206966667 | -0.469033333 | -0.1308      |
| UBA5         | -0.032733333 | -0.183866667 | -0.088633333 | -0.0023      |
| LOC339799    | -0.191366667 | -0.120033333 | -0.115933333 | 0.0118       |
| LOC440487    | -0.273266667 | -0.0421      | -0.314       | -0.170466667 |
| SDF2         | -0.271866667 | -0.017966667 | -0.108233333 | 0.006933333  |
| LOC123688    | -0.1668      | 0.005266667  | -0.0579      | -0.077433333 |
| LRCH2        | -0.012933333 | -0.140366667 | -0.0862      | -0.086766667 |
| VPS37B       | 0.1123       | 0.170066667  | -0.1908      | 0.278633333  |
| DIMT1L       | 0.0417       | -0.084833333 | 0.047666667  | 0.227233333  |
| FBXO17       | -0.205433333 | -0.1827      | -0.262       | -0.060033333 |
| SYT11        | -0.535566667 | -0.3592      | -0.0438      | -0.2458      |
| MIR607       | -0.1153      | -0.099433333 | -0.090066667 | 0.096866667  |
| ACBD3        | -0.149133333 | -0.206433333 | -0.3495      | -0.014966667 |
| ARID3B       | -0.1824      | -0.002966667 | -0.066566667 | 0.0946       |
| TMEM49       | -0.146766667 | -0.101333333 | -0.0073      | 0.068333333  |
| KDELR2       | 0.005233333  | 0.013933333  | -0.272266667 | 0.069466667  |
| LOC100134053 | -0.147066667 | 0.0661       | 0.020333333  | 0.019166667  |
| THEM2        | -0.3593      | -0.2132      | -0.084366667 | -0.128833333 |
| SLC44A4      | -0.1105      | -0.026033333 | 0.0484       | -0.0348      |
| C18orf10     | -0.1541      | -0.0971      | 0.0126       | 0.006366667  |
| PANK2        | 0.135366667  | -0.274766667 | -0.156333333 | 0.0551       |
| LOC440957    | -0.0397      | -0.285733333 | -0.034433333 | -0.014066667 |
| TOP1P1       | 0.041966667  | 0.1026       | 0.018866667  | 0.202333333  |
| PDRG1        | -0.033966667 | 0.021033333  | -0.1293      | 0.2435       |
| MACF1        | 0.025533333  | 0.047233333  | 0.151766667  | 0.074766667  |
| C2orf69      | -0.2132      | 0.027        | 0.108033333  | -0.065766667 |
| KIAA0586     | -0.055066667 | -0.133933333 | 0.133466667  | 0.1139       |
| LOC131691    | -0.3867      | 0.038666667  | -0.388366667 | -0.288933333 |
| C16orf72     | -0.0455      | -0.164166667 | -0.107466667 | 0.221066667  |
| HCCA2        | -0.139       | -0.1489      | -0.321       | 0.028866667  |
| SF3A3        | -0.027533333 | -0.101233333 | -0.019666667 | 0.1174       |
| CDC2L5       | -0.0787      | -0.211833333 | -0.2399      | 0.061133333  |
| LCTL         | -0.022066667 | -0.1223      | -0.1589      | 0.071966667  |
| C21orf126    | 0.1051       | -0.207733333 | 0.001766667  | 0.190033333  |
| SLC35B1      | 0.0242       | -0.005366667 | -0.287133333 | 0.069866667  |
| POLM         | -0.150566667 | -0.084533333 | -0.069566667 | 0.102833333  |
| DYRK4        | -0.253866667 | -0.126066667 | -0.2738      | -0.020333333 |
| KIAA0495     | -0.164733333 | -0.209833333 | 0.000666667  | 0.027733333  |
| NAB1         | -0.275633333 | -0.1539      | 0.008033333  | 0.000233333  |
| SUCLA2       | -0.043566667 | -0.046533333 | -0.0472      | 0.097133333  |
| HSP90AB4P    | -0.069466667 | 0.299766667  | -0.202833333 | 0.1583       |
| THOC4        | 0.283633333  | -0.021333333 | -0.097033333 | 0.1734       |
| CSAG1        | -0.190166667 | -0.277566667 | -0.040866667 | -0.037633333 |
| RASGRP3      | -0.121866667 | -0.321066667 | -0.089233333 | 0.046866667  |

|              |              |              |              |              |
|--------------|--------------|--------------|--------------|--------------|
| LOC389203    | -0.100033333 | -0.0829      | -0.1208      | 0.073766667  |
| FAM69A       | -0.390666667 | -0.259333333 | -0.032866667 | -0.153333333 |
| FLJ35934     | -0.3456      | -0.142433333 | -0.192366667 | -0.137766667 |
| C11orf84     | -0.0309      | 0.0831       | -0.024033333 | 0.154433333  |
| PLAGL2       | 0.059833333  | 0.0479       | 0.074633333  | 0.2795       |
| LOC653103    | 0.045466667  | -0.1993      | -0.317733333 | 0.025066667  |
| DOCK11       | -0.234733333 | -0.246933333 | -0.164766667 | -0.040633333 |
| ANKRD10      | -0.040966667 | -0.193833333 | -0.243066667 | 0.197366667  |
| LOC401098    | -0.307733333 | 0.0472       | 0.0577       | -0.164266667 |
| MTIF3        | -0.2553      | -0.080433333 | -0.1672      | -0.0771      |
| RFESD        | -0.013       | -0.083166667 | -0.000933333 | 0.087966667  |
| LOC100128353 | -0.073966667 | -0.095933333 | -0.196733333 | 0.0295       |
| SDHALP1      | 0.196833333  | -0.013066667 | -0.061433333 | 0.295866667  |
| NUPL2        | 0.012566667  | 0.029433333  | 0.0155       | 0.186866667  |
| HNRPA1L-2    | -0.016966667 | -0.083466667 | -0.0377      | 0.0501       |
| LOC100128775 | -0.2372      | 0.062666667  | 0.033166667  | -0.028033333 |
| TRPS1        | -0.1455      | -0.048233333 | -0.103333333 | -0.081466667 |
| C11orf83     | -0.078766667 | 0.0853       | -0.116       | 0.117433333  |
| LOC644330    | 0.2314       | 0.1677       | -0.144033333 | 0.1971       |
| RBM41        | -0.110733333 | -0.032433333 | -0.053       | 0.0506       |
| POLR3F       | 0.185        | 0.061633333  | -0.163666667 | 0.315666667  |
| IFT74        | -0.1922      | -0.177766667 | -0.318633333 | -0.0555      |
| LOC100128423 | -0.266766667 | -0.033433333 | -0.239966667 | -0.108466667 |
| FRAG1        | -0.3378      | -0.117033333 | -0.1625      | -0.076333333 |
| CD55         | -0.159033333 | -0.251233333 | -0.000533333 | 0.054766667  |
| UPK1A        | -0.228966667 | -0.3044      | -0.148233333 | -0.208366667 |
| ZNF91        | -0.1577      | -0.025766667 | -0.156166667 | -0.003533333 |
| LRFN3        | -0.200766667 | -0.1241      | -0.0967      | 0.050366667  |
| LOC653450    | -0.1545      | -0.155333333 | -0.357333333 | -0.027633333 |
| HSP90AB1     | 0.075433333  | 0.038633333  | 0.0319       | 0.107333333  |
| CYP27C1      | 0.063433333  | -0.0993      | -0.136033333 | 0.152166667  |
| HEXB         | -0.1781      | -0.2986      | -0.124333333 | -0.077233333 |
| LSP1         | -0.108333333 | 0.062666667  | -0.276366667 | 0.189133333  |
| RANGRF       | -0.092433333 | -0.018366667 | -0.065866667 | 0.060566667  |
| LOC651436    | -0.083966667 | -0.203933333 | -0.134033333 | 0.028333333  |
| EVC          | -0.3043      | -0.155333333 | -0.139566667 | -0.042666667 |
| LOC642852    | -0.1346      | -0.030733333 | -0.3177      | -0.087866667 |
| PDLIM5       | 0.3345       | 0.22         | 0.0569       | 0.327733333  |
| ISY1         | -0.057233333 | -0.048033333 | -0.158833333 | 0.072366667  |
| LOC100134182 | -0.023033333 | -0.1043      | -0.0475      | 0.0965       |
| PRPF40A      | 0.1157       | 0.124266667  | -0.065033333 | 0.0342       |
| SLC10A7      | -0.052433333 | -0.02        | -0.211633333 | 0.081333333  |
| NAT1         | 0.0103       | -0.119133333 | -0.0645      | 0.1528       |
| LOC646766    | -0.052933333 | -0.059066667 | 0.051433333  | 0.212533333  |
| HISPPD2A     | -0.182666667 | -0.268966667 | 0.0134       | -0.062466667 |
| SNRNP35      | -0.218933333 | -0.119866667 | 0.063        | -0.036266667 |
| ZNF550       | -0.069833333 | -0.1866      | -0.240266667 | 0.042133333  |

|               |              |              |              |              |
|---------------|--------------|--------------|--------------|--------------|
| NR1H2         | -0.293133333 | -0.122433333 | -0.162833333 | -0.009       |
| CASK          | -0.057766667 | -0.0436      | -0.1685      | -0.022833333 |
| LOC646786     | -0.0237      | 0.062533333  | -0.0077      | -0.0023      |
| C1orf89       | -0.3356      | -0.080733333 | -0.135166667 | -0.055166667 |
| DGKA          | -0.026133333 | -0.016466667 | -0.063966667 | 0.056        |
| LOC641978     | -0.147466667 | -0.029333333 | -0.1375      | -0.018266667 |
| LOC648852     | -0.129566667 | 0.2001       | 0.010733333  | -0.0248      |
| ZNF3          | -0.224966667 | -0.072433333 | -0.115333333 | -0.071933333 |
| SET           | -0.041233333 | -0.0983      | -0.1052      | 0.0345       |
| SAV1          | 0.0238       | -0.2024      | -0.1017      | 0.141866667  |
| ECE2          | 0.1013       | -0.028433333 | -0.0985      | 0.113633333  |
| ARHGAP21      | -0.150066667 | -0.231466667 | -0.216966667 | -0.014733333 |
| DDX28         | -0.178666667 | -0.108833333 | -0.071066667 | 0.0481       |
| INTU          | -0.172333333 | -0.012433333 | -0.127233333 | 0.007866667  |
| TCEAL1        | -0.147233333 | -0.2345      | -0.3017      | -0.061633333 |
| CC2D1B        | -0.058166667 | -0.211       | -0.200366667 | -0.028766667 |
| LOC731432     | 0.0067       | 0.1089       | -0.183366667 | 0.082433333  |
| RFNG          | -0.2464      | -0.0899      | -0.288466667 | -0.143433333 |
| ASAH2C        | 0.077233333  | -0.056266667 | -0.0873      | 0.190466667  |
| LOC100129934  | -0.2887      | 0.044733333  | -0.315533333 | -0.115266667 |
| CRTC2         | 0.093833333  | 0.060133333  | -0.0898      | 0.384833333  |
| WWC1          | 0.161533333  | 0.135866667  | -0.042533333 | 0.1557       |
| CDC42BPA      | -0.1875      | 0.058266667  | -0.1995      | -0.218733333 |
| POP5          | -0.042333333 | 0.0102       | 0.014033333  | 0.098133333  |
| LOC731314     | 0.010433333  | 0.1465       | -0.127466667 | 0.1623       |
| BTN2A1        | 0.324066667  | 0.300066667  | 0.057033333  | 0.435433333  |
| PARP6         | -0.129966667 | -0.322966667 | -0.1912      | -0.0278      |
| C3orf31       | 0.102533333  | 0.0638       | -0.1245      | 0.2027       |
| SP140L        | 0.003366667  | -0.006866667 | -0.1182      | 0.0632       |
| XPOT          | -0.2634      | -0.247033333 | -0.253566667 | -0.165866667 |
| ITGB7         | -0.0067      | -0.0365      | -0.1848      | 0.084033333  |
| SNORA25       | -0.041766667 | -0.033433333 | 0.0193       | -0.124033333 |
| RNU6ATAC      | -0.161933333 | -0.1         | -0.082133333 | 0.041433333  |
| DIAPH1        | 0.1108       | 0.056066667  | -0.0543      | 0.225633333  |
| ISCA2         | 0.057466667  | -0.025333333 | -0.071733333 | 0.1415       |
| RUVBL2        | 0.028566667  | -0.041733333 | 0.045066667  | 0.1544       |
| CRCP          | -0.3407      | -0.0029      | 0.185933333  | -0.054033333 |
| DKFZP564O0523 | 0.043266667  | -0.187933333 | -0.152       | 0.0306       |
| LOC388532     | -0.190433333 | -0.218966667 | -0.074866667 | -0.0148      |
| NLRP8         | -0.3203      | -0.047733333 | -0.0627      | -0.241566667 |
| HEBP1         | -0.3416      | -0.226333333 | 0.016533333  | -0.0282      |
| PATE2         | -0.250733333 | -0.158566667 | -0.038433333 | -0.084333333 |
| PMM2          | -0.014433333 | -0.009133333 | -0.087433333 | 0.144166667  |
| RPN2          | -0.194166667 | -0.157633333 | -0.1317      | 0.040766667  |
| C1orf218      | -0.101866667 | -0.182833333 | -0.084633333 | 0.014133333  |
| TSPAN10       | -0.9389      | -0.587333333 | 0.006333333  | -0.356133333 |
| ARHGDI1A      | 0.039333333  | 0.0179       | 0.0895       | 0.242966667  |

|              |              |              |              |              |
|--------------|--------------|--------------|--------------|--------------|
| LOC100130263 | -0.159266667 | 0.021933333  | -0.0526      | 0.054633333  |
| BUB1B        | 0.1085       | 0.0134       | 0.0513       | 0.232033333  |
| AKT1S1       | -0.037233333 | -0.057533333 | -0.024466667 | 0.1519       |
| ZNF189       | -0.143266667 | -0.282433333 | -0.168166667 | 0.0628       |
| TYW3         | -0.013133333 | 0.214133333  | 0.236        | 0.281033333  |
| AP4M1        | -0.039       | -0.0234      | -0.0251      | 0.065966667  |
| TRMT2B       | 0.1124       | -0.1343      | -0.1097      | 0.1127       |
| TBC1D17      | -0.2709      | -0.220333333 | -0.2333      | -0.2458      |
| DZIP1        | -0.219533333 | -0.087533333 | -0.126733333 | -0.040466667 |
| PEBP1        | -0.212866667 | -0.1159      | -0.0448      | 0.0288       |
| LOC653524    | -0.213766667 | -0.0239      | -0.082933333 | 0.017366667  |
| UBE2D3       | 0.1214       | 0.039        | -0.0454      | 0.262833333  |
| ZNF486       | -0.3721      | 0.038133333  | -0.061366667 | -0.265533333 |
| POP7         | 0.152733333  | 0.1507       | 0.006933333  | 0.220866667  |
| CROP         | -0.1739      | -0.274433333 | -0.148666667 | -0.2019      |
| HLA-G        | -0.178666667 | -0.314       | -0.1113      | -0.115033333 |
| LOC649260    | 0.0505       | 0.0565       | -0.160833333 | 0.1195       |
| LOC729960    | -0.042166667 | -0.0094      | -0.013933333 | 0.111166667  |
| C9orf69      | -0.023533333 | -0.023366667 | -0.139633333 | 0.0805       |
| C5orf28      | -0.0765      | -0.0482      | 0.272466667  | -0.0316      |
| C19orf25     | -0.176866667 | -0.0704      | -0.122833333 | 0.1311       |
| SNORA13      | -0.042633333 | 0.004433333  | -0.0701      | 0.220433333  |
| LOC440737    | -0.0995      | -0.1474      | -0.0077      | 0.2631       |
| TCF3         | 0.087666667  | -0.159566667 | -0.1531      | 0.0674       |
| LOC729500    | -0.1989      | -0.2007      | -0.1616      | -0.0778      |
| STAT3        | -0.132033333 | -0.0874      | -0.142833333 | 0.022033333  |
| GNA11        | 0.131866667  | 0.142133333  | -0.169733333 | 0.159966667  |
| NOSIP        | -0.065333333 | 0.014466667  | -0.1322      | 0.034466667  |
| COX7A2L      | -0.185266667 | -0.2195      | -0.113033333 | 0.015833333  |
| LOC732165    | 0.029466667  | 0.141466667  | -0.1632      | -0.0197      |
| TRIM4        | -0.181066667 | -0.3115      | -0.2537      | -0.0391      |
| PSMB3        | 0.028433333  | 0.040766667  | -0.061933333 | 0.1395       |
| C7orf36      | -0.024633333 | -0.046333333 | -0.1474      | 0.0552       |
| C14orf129    | -0.143       | -0.0431      | 0.0489       | 0.162866667  |
| CEBPG        | -0.245666667 | -0.262       | -0.399466667 | -0.282466667 |
| TAX1BP1      | -0.411466667 | -0.1258      | -0.060366667 | -0.090866667 |
| LOC100129645 | -0.0642      | -0.102533333 | -0.0971      | 0.1093       |
| PPARBP       | -0.1216      | -0.0065      | -0.147866667 | 0.037966667  |
| IPPK         | 0.0093       | -0.038633333 | 0.030766667  | 0.1639       |
| LOC642969    | 0.029566667  | 0.027833333  | -0.103766667 | 0.102166667  |
| ACAA1        | -0.2577      | -0.1579      | -0.052533333 | -0.0932      |
| BLCAP        | 0.044233333  | -0.120633333 | -0.2071      | 0.1172       |
| ACOT8        | -0.2037      | -0.312633333 | -0.124166667 | -0.0911      |
| HDAC8        | -0.220666667 | -0.252933333 | 0.074866667  | -0.044766667 |
| ZNF93        | -0.248033333 | 0.083066667  | -0.311733333 | -0.2088      |
| HNRPK        | 0.1359       | -0.0795      | 0.110433333  | 0.314        |
| STAG3L4      | -0.183233333 | -0.160766667 | -0.040933333 | 0.108        |

|              |              |              |              |              |
|--------------|--------------|--------------|--------------|--------------|
| KARS         | -0.010233333 | -0.075466667 | -0.0308      | 0.162266667  |
| MRPL22       | 0.242133333  | -0.030433333 | -0.075033333 | 0.171166667  |
| NECAB3       | -0.0929      | -0.156966667 | -0.093766667 | 0.084033333  |
| LOC728678    | -0.100666667 | -0.0271      | -0.037233333 | 0.024566667  |
| GLCE         | -0.0976      | -0.159666667 | -0.021066667 | 0.066133333  |
| LOC731985    | -0.0059      | -0.2891      | -0.145433333 | 0.008766667  |
| TUBE1        | -0.112566667 | 0.0012       | -0.289233333 | -0.021533333 |
| AKAP12       | -0.2775      | 0.0581       | 0.195933333  | 0.106666667  |
| MRPL33       | 0.1138       | 0.061966667  | -0.042966667 | 0.125666667  |
| MICA         | -0.012366667 | -0.142066667 | 0.094833333  | 0.2645       |
| SURF6        | 0.1086       | 0.045933333  | -0.047066667 | 0.204566667  |
| TOR1AIP2     | 0.257533333  | 0.061033333  | 0.061766667  | 0.201133333  |
| CALCOCO1     | -0.2729      | -0.226233333 | -0.216566667 | -0.1513      |
| CYP2R1       | 0.046833333  | -0.180933333 | -0.1958      | 0.112066667  |
| GOLPH3       | -0.0795      | -0.133366667 | -0.207833333 | 0.0279       |
| LOC641848    | -0.533933333 | -0.172066667 | -0.402       | -0.427066667 |
| LOC100130856 | -0.192       | 0.0027       | -0.255633333 | 0.0832       |
| LOC730316    | 0.093766667  | -0.111633333 | 0.018733333  | 0.0636       |
| SNORD14B     | 0.005333333  | 0.000533333  | 0.035866667  | 0.151266667  |
| PPP2R5B      | -0.1334      | -0.129566667 | -0.1014      | 0.001966667  |
| ROD1         | 0.134333333  | 0.007733333  | 0.0147       | 0.1554       |
| IP6K1        | -0.045266667 | -0.080566667 | -0.274966667 | 0.1074       |
| FAM72A       | 0.1187       | 0.038433333  | -0.066       | 0.142866667  |
| TP53BP2      | -0.177666667 | -0.0173      | -0.2225      | -0.022466667 |
| NFE2L1       | -0.338933333 | -0.255       | -0.294566667 | -0.261166667 |
| MCTS1        | -0.245566667 | 0.0187       | -0.099833333 | -0.0872      |
| DNPEP        | -0.075633333 | -0.116233333 | -0.140233333 | 0.149966667  |
| CCDC137      | -0.002033333 | 0.121766667  | 0.039733333  | 0.159166667  |
| MPHOSPH6     | 0.073366667  | 0.087233333  | 0.1275       | 0.241566667  |
| CBLL1        | 0.272833333  | -0.048033333 | 0.0065       | 0.309066667  |
| SYF2         | -0.209233333 | -0.220633333 | -0.325766667 | -0.071566667 |
| LOC283788    | -0.288966667 | -0.159066667 | -0.1208      | -0.098066667 |
| LOC648390    | -0.161066667 | -0.2822      | 0.1084       | 0.031866667  |
| LOC100129890 | -0.1844      | -0.3286      | -0.131533333 | -0.099666667 |
| SNORD55      | -0.0794      | -0.0272      | -0.059333333 | 0.037466667  |
| DMTF1        | 0.0966       | -0.0347      | -0.1306      | -0.025233333 |
| MBD2         | 0.0768       | -0.0448      | -0.137233333 | 0.084033333  |
| ATG10        | -0.349933333 | -0.063466667 | -0.168666667 | -0.1283      |
| BICD2        | 0.140833333  | 0.2247       | 0.0947       | 0.336233333  |
| RBMS2        | 0.0002       | 0.062066667  | -0.170466667 | 0.0296       |
| TRMT5        | 0.034366667  | -0.012566667 | -0.114966667 | 0.2495       |
| UBE2L6       | -0.544633333 | -0.338266667 | 0.1287       | -0.102633333 |
| C7orf13      | -0.114733333 | -0.196466667 | -0.140366667 | -0.042233333 |
| C12orf31     | 0.046233333  | 0.145166667  | -0.063833333 | 0.242033333  |
| N4BP2L2      | -0.3791      | -0.3818      | -0.047633333 | -0.212566667 |
| SFRS4        | 0.156066667  | -0.021833333 | -0.119333333 | 0.149733333  |
| MED22        | -0.096033333 | -0.039133333 | -0.113333333 | 0.073933333  |

|              |              |              |              |              |
|--------------|--------------|--------------|--------------|--------------|
| NME3         | -0.324366667 | -0.191566667 | -0.137966667 | -0.202033333 |
| ZNF775       | -0.166766667 | -0.1067      | -0.1236      | 0.157766667  |
| MGC52000     | -0.1219      | -0.2083      | -0.170433333 | 0.0689       |
| ANKRD57      | 0.468866667  | 0.0053       | -0.028166667 | 0.433466667  |
| LOC401847    | -0.026766667 | 0.1266       | 0.116866667  | 0.265533333  |
| SLU7         | -0.187333333 | -0.167233333 | -0.0887      | -0.074333333 |
| LOC729406    | 0.141866667  | 0.047        | -0.341133333 | 0.078733333  |
| PANK1        | -0.119233333 | -0.182166667 | -0.0388      | 0.109333333  |
| ZNF561       | -0.1046      | -0.156866667 | -0.190933333 | -0.023533333 |
| RFPL4A       | -0.129633333 | -0.124566667 | -0.055333333 | 0.1046       |
| C9orf86      | -0.2336      | -0.0964      | -0.092833333 | -0.0132      |
| PSMB1        | -0.081766667 | 0.004166667  | -0.032566667 | 0.186733333  |
| CCDC103      | -0.115566667 | -0.054733333 | -0.145833333 | 0.060166667  |
| SNORA32      | 0.006933333  | 0.0433       | 0.040933333  | 0.063566667  |
| ABHD15       | -0.2247      | -0.0745      | -0.0689      | 0.206733333  |
| IQCG         | -0.0686      | -0.035433333 | -0.234766667 | 0.0916       |
| NDUFAF3      | -0.216433333 | -0.189533333 | -0.016266667 | -0.0957      |
| BYSL         | 0.255766667  | 0.200633333  | 0.084466667  | 0.381266667  |
| HYAL2        | 0.0361       | -0.0112      | 0.042533333  | 0.164633333  |
| FUBP1        | 0.142833333  | -0.0148      | -0.077666667 | 0.229        |
| CRK          | 0.102766667  | 0.121666667  | -0.103833333 | 0.154866667  |
| LOC727970    | -0.388466667 | -0.045433333 | -0.438333333 | -0.323733333 |
| RNF11        | 0.071133333  | -0.174833333 | -0.089233333 | 0.108266667  |
| AGGF1        | -0.167433333 | -0.244333333 | -0.101766667 | 0.051766667  |
| ALG11        | -0.160333333 | 0.026733333  | -0.260166667 | -0.137566667 |
| ACTR2        | -0.063866667 | -0.003666667 | -0.104633333 | 0.060466667  |
| LOC100128469 | -0.0431      | -0.0239      | -0.09        | 0.069        |
| C14orf79     | -0.040833333 | -0.123366667 | -0.264033333 | -0.012133333 |
| FLJ22222     | -0.012933333 | -0.221633333 | -0.2105      | -0.060133333 |
| HKDC1        | 0.0371       | 0.022866667  | -0.0703      | 0.2541       |
| PPRC1        | 0.2293       | 0.112        | 0.0025       | 0.215866667  |
| LOC728533    | -0.073066667 | -0.156433333 | -0.162833333 | 0.0435       |
| MAT2A        | -0.022333333 | -0.1736      | 0.0436       | 0.1301       |
| SNORD96A     | 0.050333333  | 0.075866667  | -0.057966667 | 0.171933333  |
| SLC35A5      | -0.307666667 | -0.107166667 | 0.0165       | 0.106766667  |
| VAPB         | -0.254033333 | -0.0742      | -0.004233333 | -0.143266667 |
| LOC100133517 | 0.054166667  | -0.126466667 | -0.0401      | 0.0404       |
| STIM1        | -0.1168      | -0.242133333 | -0.3407      | -0.1943      |
| SLC25A26     | -0.202833333 | -0.388666667 | -0.071566667 | -0.0736      |
| LOC100009676 | -0.031133333 | -0.142       | -0.172166667 | 0.0453       |
| CHSY1        | 0.137766667  | -0.001033333 | 0.015666667  | 0.241166667  |
| LOC728312    | -0.165866667 | -0.171066667 | -0.112566667 | -0.085233333 |
| SDF4         | -0.150466667 | -0.3447      | -0.204266667 | -0.126766667 |
| RBM33        | -0.152866667 | -0.1525      | -0.060633333 | -0.1234      |
| LOC647276    | -0.218833333 | -0.0745      | -0.138833333 | 0.006933333  |
| LOC647389    | -0.192166667 | 0.035933333  | -0.0209      | -0.089       |
| CSNK1E       | 3.33E-05     | -0.002433333 | 0.002466667  | -0.071466667 |



|              |              |              |              |              |
|--------------|--------------|--------------|--------------|--------------|
| ZBTB5        | -0.1705      | -0.094733333 | -0.110033333 | 0.121833333  |
| LOC100128084 | -0.2552      | 0.0579       | 0.024733333  | 0.020633333  |
| PNPO         | -0.178633333 | -0.001966667 | -0.0406      | 0.009966667  |
| C13orf1      | -0.0721      | 0.002366667  | -0.072233333 | 0.033        |
| DIDO1        | -0.007433333 | -0.230033333 | -0.159866667 | -0.050833333 |
| ZWILCH       | 0.0394       | 0.121833333  | -0.0919      | 0.1802       |
| CNGB1        | -0.116933333 | 0.059633333  | -0.1262      | -0.073266667 |
| VAMP1        | -0.0954      | -0.1409      | -0.0536      | 0.059633333  |
| SMAD6        | -0.285066667 | -0.212733333 | -0.1493      | -0.245933333 |
| LOC728344    | -0.010733333 | -0.019766667 | -0.094866667 | 0.034833333  |
| ZNF165       | -0.140033333 | -0.087       | -0.145       | -0.000633333 |
| ERCC2        | -0.061766667 | 0.075833333  | -0.188533333 | -0.0614      |
| LOC391532    | 0.0632       | -0.009       | 0.144166667  | 0.131233333  |
| LOC644254    | -0.023766667 | -0.1343      | 0.044466667  | 0.134766667  |
| GCC1         | -0.3777      | -0.338066667 | -0.334133333 | -0.108       |
| CRYBB2       | 0.057533333  | -0.155566667 | -0.1736      | 0.045066667  |
| FTO          | -0.212733333 | -0.1439      | -0.0515      | 0.026166667  |
| LOC100129211 | -0.197066667 | 0.063366667  | -0.1385      | -0.137833333 |
| GPX1         | 0.0456       | -0.041833333 | -0.026633333 | 0.0337       |
| INPP5A       | 0.028        | -0.045333333 | -0.214366667 | 0.070033333  |
| DHX16        | 0.1739       | 0.023733333  | -0.2329      | 0.189333333  |
| SNRNP48      | 0.0045       | -0.000166667 | -0.1161      | 0.1413       |
| LOC388339    | -0.216666667 | -0.118566667 | -0.115833333 | -0.0396      |
| LOC643011    | -0.201166667 | 0.003333333  | -0.207533333 | -0.173133333 |
| ECD          | 0.054133333  | -0.013366667 | -0.029833333 | 0.059033333  |
| HDAC7A       | 0.045866667  | -0.018533333 | -0.097633333 | 0.0176       |
| LOC390735    | -0.412866667 | -0.1104      | -0.231633333 | -0.127833333 |
| PIGG         | -0.0729      | -0.113433333 | -0.175033333 | 0.1239       |
| GABPB2       | 0.2372       | 0.1834       | 0.010933333  | 0.315466667  |
| RCN1         | -0.066966667 | -0.0283      | -0.226866667 | 0.072066667  |
| SH3BGRL2     | -0.1437      | 0.0252       | -0.091166667 | 0.013466667  |
| ZNF277       | -0.422133333 | -0.124366667 | -0.1511      | -0.252133333 |
| LOC729057    | 0.0713       | 0.090766667  | -0.045166667 | 0.1675       |
| CCDC49       | -0.119133333 | 0.097        | -0.0932      | 0.131266667  |
| PSMD12       | 0.096466667  | 0.123766667  | -0.0547      | 0.2599       |
| LMAN2L       | -0.232033333 | -0.037066667 | -0.145066667 | -0.0016      |
| ACBD6        | 0.023366667  | -0.1024      | -0.120966667 | 0.1475       |
| ORAI1        | -0.117266667 | 0.2118       | 0.3541       | 0.302733333  |
| RXRA         | -0.211433333 | -0.124666667 | -0.238966667 | -0.0348      |
| ADORA2B      | 0.1058       | 0.4115       | 0.119233333  | 0.3431       |
| MED16        | -0.125466667 | -0.079333333 | -0.1466      | 0.049433333  |
| PHF2         | -0.2202      | 0.0269       | -0.102333333 | 0.0467       |
| STAG1        | 0.088033333  | -0.0189      | -0.065933333 | 0.252833333  |
| SUMO1        | -0.2908      | -0.002033333 | -0.194266667 | -0.1269      |
| SUMF2        | -0.207466667 | -0.282233333 | -0.149533333 | -0.1307      |
| LOC643550    | -0.031333333 | 0.072233333  | -0.101833333 | 0.114066667  |
| LOC649365    | -0.055733333 | 0.050433333  | 0.011433333  | 0.275933333  |

|              |              |              |              |              |
|--------------|--------------|--------------|--------------|--------------|
| TSPAN13      | 0.2199       | 0.0672       | -0.328933333 | 0.153566667  |
| RBM43        | -0.336833333 | -0.2896      | -0.358433333 | -0.234233333 |
| ARFGAP1      | -0.078833333 | -0.125233333 | -0.2788      | -0.0712      |
| TFB2M        | -0.013633333 | 0.084833333  | -0.003       | 0.172533333  |
| ZNF444       | -0.1389      | -0.012733333 | -0.092366667 | 0.069        |
| EVI5         | 0.063633333  | 0.0416       | -0.117066667 | -0.009666667 |
| KIAA0494     | -0.068333333 | -0.175266667 | -0.1697      | 0.051866667  |
| LOC728758    | -0.22        | -0.161666667 | -0.1231      | -0.066566667 |
| DOCK1        | -0.179766667 | -0.124633333 | -0.141333333 | 0.0225       |
| LOC643007    | -0.477966667 | -0.007733333 | -0.394466667 | -0.194233333 |
| ZNF239       | -0.084366667 | -0.0377      | -0.022533333 | 0.122433333  |
| PSMD13       | 0.166433333  | -0.161466667 | -0.0364      | 0.248066667  |
| ROM1         | -0.099033333 | -0.2424      | -0.083833333 | 0.086133333  |
| BRWD2        | -0.131266667 | -0.2359      | 0.0071       | -0.0307      |
| THOC3        | 0.227466667  | -0.098466667 | 0.0738       | 0.2578       |
| CENPJ        | 0.077        | 0.003566667  | -0.201133333 | 0.012166667  |
| FXC1         | 0.0686       | -0.1815      | -0.071       | 0.0462       |
| LOC644655    | -0.0091      | 0.178133333  | 0.011966667  | 0.247233333  |
| LUC7L2       | 0.0619       | -0.016466667 | 0.069066667  | 0.292533333  |
| RRAGA        | -0.096       | -0.0146      | -0.155566667 | -0.050333333 |
| ZNF432       | -0.177066667 | -0.067466667 | 0.075        | 0.128966667  |
| LOC100132496 | -0.333066667 | -0.043266667 | -0.314633333 | -0.197533333 |
| NMT1         | -0.092866667 | -0.203733333 | -0.1557      | 0.1272       |
| MLL3         | -0.066066667 | -0.041666667 | 0.0063       | 0.081133333  |
| PCDHB19P     | -0.028833333 | -0.1549      | 0.0078       | 0.112333333  |
| UCKL1        | -0.028       | -0.139666667 | -0.157566667 | -0.039633333 |
| FAM160A2     | 0.008266667  | -0.1367      | -0.128033333 | 0.1133       |
| LOC286208    | -0.073133333 | 0.0272       | -0.063366667 | 0.0799       |
| ZFYVE9       | -0.126266667 | 0.041866667  | -0.2088      | -0.038533333 |
| PHLDB1       | 0.042166667  | 0.032166667  | -0.053166667 | 0.172766667  |
| ZNF721       | 0.005566667  | 0.003266667  | -0.094833333 | 0.2123       |
| RBM9         | -0.252033333 | 0.030866667  | -0.072366667 | -0.050733333 |
| SLC25A42     | -0.273466667 | -0.257233333 | -0.2741      | -0.173133333 |
| LOC100129543 | -0.013766667 | -0.1723      | -0.153366667 | -0.070466667 |
| TBL2         | 0.130266667  | -0.085966667 | -0.236266667 | 0.1678       |
| RAB8B        | 0.1085       | -0.287233333 | -0.107733333 | -0.031566667 |
| GTF2F1       | 0.049966667  | -0.028833333 | -0.3264      | 0.040066667  |
| LARP4B       | 0.183466667  | 0.107833333  | -0.0359      | 0.2383       |
| DDA1         | 0.102266667  | -0.013933333 | -0.006833333 | 0.1881       |
| ADPGK        | 0.019        | 0.0183       | -0.1056      | 0.109466667  |
| GNPAT        | -0.097233333 | -0.063466667 | -0.115233333 | 0.0883       |
| LOC729798    | -0.486733333 | -0.020166667 | -0.255466667 | -0.362666667 |
| LOC100132288 | -0.199633333 | -0.112333333 | -0.288766667 | -0.013733333 |
| EIF3CL       | 0.0217       | -0.283466667 | -0.192166667 | 0.138666667  |
| ERH          | 0.1437       | -0.141866667 | -0.102966667 | 0.0971       |
| SLC7A11      | -0.234366667 | 0.002433333  | -0.179233333 | 0.071466667  |
| PCDH18       | -0.174866667 | -0.132133333 | -0.117366667 | -0.085633333 |

|              |              |              |              |              |
|--------------|--------------|--------------|--------------|--------------|
| MOCS3        | -0.145433333 | 0.000566667  | -0.079133333 | 0.1121       |
| LOC653884    | -0.0716      | 0.031533333  | 0.077933333  | 0.012166667  |
| AK2P2        | -0.070633333 | -0.0603      | -0.0467      | -0.153733333 |
| KIFAP3       | 0.0976       | -0.1017      | -0.306333333 | 0.057833333  |
| AKT3         | 0.0393       | 0.0959       | -0.031766667 | 0.1535       |
| LOC93349     | -0.057566667 | -0.012233333 | 0.033433333  | 0.0792       |
| C1orf57      | -0.205133333 | -0.1177      | -0.0443      | -0.012466667 |
| LOC100132395 | -0.246733333 | -0.242033333 | -0.357033333 | -0.168066667 |
| CDC2         | 0.067333333  | -0.0057      | -0.0642      | 0.218033333  |
| ASAP1        | -0.046066667 | -0.155933333 | 0.085566667  | 0.071166667  |
| GGNBP2       | 0.1546       | -0.0982      | -0.254766667 | 0.160033333  |
| SNORA3       | 0.002366667  | -0.0622      | -0.0253      | 0.108866667  |
| FKTN         | -0.0764      | 0.047366667  | -0.012666667 | -0.042766667 |
| LOC401152    | -0.259733333 | -0.0157      | -0.190666667 | -0.223566667 |
| IKBKG        | 0.087633333  | -0.017633333 | -0.115966667 | 0.176233333  |
| FBXO9        | 0.003333333  | -0.1524      | 0.015166667  | 0.127        |
| LOC442609    | -0.007233333 | -0.114933333 | -0.026533333 | 0.101566667  |
| NUDCD3       | -0.2599      | -0.021033333 | 0.163266667  | 0.059833333  |
| ZNF562       | 0.007466667  | 0.174366667  | -0.000333333 | 0.124633333  |
| NAIF1        | -0.033333333 | -0.0022      | -0.1421      | 0.007066667  |
| LOC642033    | 0.015133333  | -0.026233333 | 0.019033333  | 0.082933333  |
| SNIP1        | -0.037833333 | 0.003833333  | -0.035766667 | 0.142466667  |
| C17orf62     | -0.1824      | -0.107133333 | -0.058033333 | -0.069533333 |
| LOC100132106 | 0.058733333  | -0.2355      | -0.098766667 | 0.1695       |
| LOC647357    | -0.087233333 | -0.059466667 | -0.101766667 | -0.0359      |
| MSRA         | -0.0769      | -0.1425      | -0.137433333 | 0.078866667  |
| UBE1C        | -0.080166667 | -0.081333333 | 0.018366667  | -0.0649      |
| SUSD1        | -0.047233333 | -0.073733333 | -0.041533333 | 0.071233333  |
| PGAM5        | 0.093566667  | 0.096866667  | -0.105633333 | 0.013833333  |
| LOC652541    | -0.164433333 | -0.194466667 | -0.0677      | -0.014033333 |
| DCAF7        | -0.171933333 | -0.060833333 | 0.070566667  | 0.081166667  |
| LOC390876    | -0.334533333 | 0.126766667  | -0.247566667 | -0.2326      |
| ITGB5        | 0.169133333  | 0.0197       | -0.3375      | 0.0344       |
| USP4         | -0.189566667 | -0.033066667 | -0.028733333 | -0.091233333 |
| RPL36A       | 0.119466667  | 0.0768       | -0.092133333 | 0.301166667  |
| HSGT1        | -0.025733333 | -0.091466667 | -0.026766667 | 0.059166667  |
| GAMT         | -0.3908      | -0.225366667 | -0.010733333 | -0.155166667 |
| RYBP         | 0.0195       | -0.027966667 | -0.109233333 | 0.0543       |
| TTC33        | -0.053266667 | 0.023833333  | -0.214366667 | 0.105466667  |
| KIAA0174     | -0.1417      | -0.144633333 | -0.0319      | 0.0576       |
| TMEM22       | -0.0193      | -0.046333333 | -0.023733333 | 0.1185       |
| LOC647834    | -0.2832      | -0.0729      | -0.175533333 | -0.1517      |
| KRT8P9       | -0.501366667 | 0.174433333  | -0.7479      | -0.439166667 |
| LOC100131323 | 0.028366667  | -0.184233333 | -0.057       | 0.031        |
| LOC731640    | -0.231366667 | -0.172666667 | -0.110966667 | -0.093866667 |
| HNRNPA2B1    | 0.064        | -0.065766667 | 0.050966667  | 0.158466667  |
| H1FX         | 0.123366667  | -0.159733333 | -0.037466667 | 0.073166667  |

|              |              |              |              |              |
|--------------|--------------|--------------|--------------|--------------|
| ZNF193       | -0.104566667 | -0.0391      | -0.0742      | 0.2077       |
| RBM15B       | 0.008266667  | -0.187633333 | -0.147566667 | 0.125566667  |
| WBP5         | -0.115533333 | -0.072166667 | -0.437033333 | -0.1104      |
| FARS2        | -0.044966667 | -0.099066667 | -0.065033333 | 0.0121       |
| C9orf72      | -0.1836      | -0.0686      | -0.038066667 | -0.056833333 |
| PRPF4B       | -0.005633333 | -0.046666667 | 0.0124       | 0.162366667  |
| LOC389404    | -0.4687      | -0.008166667 | -0.390233333 | -0.193633333 |
| IL18         | -0.189933333 | -0.0384      | 0.073633333  | -0.016866667 |
| LOC646791    | -0.018333333 | -0.184066667 | -0.110466667 | -0.024566667 |
| LRRC56       | -0.145666667 | -0.3066      | -0.1665      | -0.085266667 |
| PMS2L2       | -0.009966667 | -0.111933333 | -0.049866667 | 0.031066667  |
| PCGF6        | 0.0511       | 0.106933333  | -0.0135      | 0.1557       |
| ARHGEF17     | -0.003033333 | -0.1871      | -0.202233333 | 0.070233333  |
| LOC644799    | -0.091033333 | -0.288066667 | -0.298766667 | -0.0979      |
| MARS         | -0.1662      | -0.075333333 | -0.3246      | -0.071166667 |
| NDUFAF1      | -0.169733333 | -0.133833333 | -0.127233333 | -0.028666667 |
| RPS27L       | 0.008233333  | -0.049633333 | -0.236966667 | 0.002766667  |
| LOC729484    | -0.268266667 | 0.009733333  | -0.360533333 | -0.163433333 |
| OLFML2A      | -0.1269      | -0.035633333 | -0.150966667 | -0.0123      |
| ARID1A       | 0.059133333  | -0.114266667 | -0.041266667 | 0.097266667  |
| PTPN20A      | -0.059333333 | -0.053033333 | -0.017966667 | 0.031366667  |
| PGRMC1       | -0.095566667 | -0.0718      | -0.0109      | 0.001333333  |
| USP5         | -0.070066667 | -0.091033333 | -0.0796      | -0.023733333 |
| PPP2R1B      | 0.198333333  | 0.040466667  | -0.1384      | 0.1555       |
| EFHA1        | -0.059366667 | -0.110866667 | -0.152933333 | 0.0283       |
| HN1L         | -0.1304      | 0.205733333  | 0.037966667  | 0.1679       |
| TPI1         | 0.249466667  | 0.077866667  | -0.149666667 | 0.092333333  |
| PDS5A        | -0.006733333 | -0.063866667 | -0.0591      | 0.036        |
| MRPS31       | -0.174633333 | 0.192        | 0.0086       | 0.1255       |
| SNORD52      | -0.0292      | 0.113966667  | -0.085433333 | -0.046566667 |
| KIAA1586     | -0.013733333 | 0.1628       | -0.0529      | 0.126866667  |
| LOC652489    | 0.195        | -0.044166667 | 0.046333333  | 0.142933333  |
| TMEM188      | 0.077733333  | -0.108866667 | -0.213333333 | 0.055933333  |
| LOC100130171 | 0.129633333  | -0.036433333 | 0.0556       | 0.116766667  |
| LOC100131166 | 0.064333333  | -0.145633333 | 0.059866667  | 0.146766667  |
| RHOT1        | -0.271566667 | -0.202633333 | -0.210066667 | -0.004333333 |
| PRDX6        | -0.050266667 | -0.099066667 | 0.0009       | 0.0746       |
| SLC25A10     | 0.085633333  | -0.004366667 | -0.010866667 | 0.0761       |
| SLC4A7       | 0.0388       | 0.211        | 0.207966667  | 0.250133333  |
| UBXN11       | -0.0906      | -0.0923      | -0.070633333 | 0.110966667  |
| KDM5B        | -0.0653      | -0.2514      | -0.143366667 | -0.0758      |
| MGC12760     | -0.095066667 | 0.095433333  | -0.060366667 | -0.047133333 |
| KLHDC5       | -0.033566667 | -0.137933333 | 0.104366667  | 0.185633333  |
| MAP7D3       | 0.019033333  | 0.028366667  | 0.012566667  | 0.058366667  |
| LOC654342    | -0.0618      | -0.1176      | 0.072433333  | 0.0525       |
| C9orf40      | -0.0725      | 0.083766667  | 0.1949       | 0.183233333  |
| RAB21        | 0.006266667  | 0.052133333  | -0.122933333 | 0.1782       |

|               |              |              |              |              |
|---------------|--------------|--------------|--------------|--------------|
| LOC440063     | -0.119933333 | -0.040933333 | -0.022866667 | -0.017633333 |
| MLLT6         | -0.082833333 | -0.104433333 | -0.2262      | -0.085033333 |
| PURB          | 0.127766667  | -0.019233333 | -0.030933333 | 0.193366667  |
| COQ5          | -0.196866667 | -0.206333333 | -0.233333333 | -0.079533333 |
| GSTM2         | -0.3634      | -0.279266667 | 0.0054       | -0.118766667 |
| LOC654191     | -0.110666667 | -0.028133333 | -0.172933333 | -0.078433333 |
| SLC12A4       | 0.1466       | 0.0385       | -0.1294      | 0.061533333  |
| PTPN4         | -0.0998      | -0.170266667 | -0.022266667 | 0.0008       |
| TM9SF4        | -0.0834      | -0.189566667 | -0.160366667 | -0.005966667 |
| SLC35D1       | -0.088233333 | -0.037766667 | -0.083266667 | 0.008033333  |
| DNAJC25-GNG10 | 0.056666667  | 0.009533333  | -0.044966667 | 0.2318       |
| LOC648931     | -0.1887      | 0.038433333  | -0.1138      | -0.0464      |
| C9orf16       | -0.138933333 | -0.1122      | -0.146033333 | 0.014766667  |
| MRPS18B       | -0.179333333 | 0.027166667  | -0.266433333 | -0.0728      |
| ACTR3B        | -0.006533333 | 0.0118       | -0.011433333 | 0.053466667  |
| C1orf55       | 0.191433333  | 0.004133333  | -0.072333333 | 0.23         |
| COX4NB        | 0.040466667  | -0.0151      | -0.109733333 | 0.073566667  |
| POMZP3        | -0.102833333 | -0.082266667 | -0.106533333 | 0.008333333  |
| CPEB4         | 0.037066667  | 0.2274       | 0.121733333  | 0.360233333  |
| C10orf104     | -0.1943      | -0.167166667 | -0.105533333 | 0.0773       |
| GTF3C5        | 0.010566667  | -0.045366667 | -0.069133333 | 0.067        |
| HSD17B7       | -0.212133333 | -0.0291      | 0.0766       | -0.062033333 |
| TMEM191A      | -0.2942      | 0.007366667  | -0.234466667 | -0.363733333 |
| FAM126A       | 0.123366667  | -0.0274      | -0.1501      | 0.142333333  |
| PIP5K1A       | 0.156466667  | -0.0302      | 0.000533333  | 0.162566667  |
| METTL4        | -0.0816      | -0.1031      | -0.044933333 | 0.067233333  |
| ZNF187        | -0.200266667 | -0.0687      | -0.097133333 | -0.0506      |
| LSM3          | 0.029833333  | -0.077966667 | 0.038933333  | 0.079566667  |
| COG3          | -0.018433333 | 0.0222       | -0.247033333 | -0.0778      |
| AK1           | -0.040766667 | -0.018733333 | -0.140133333 | 0.054133333  |
| NACA          | -0.200733333 | -0.093633333 | -0.0988      | -0.065933333 |
| CTU2          | 0.056466667  | -0.0215      | -0.1802      | 0.0054       |
| GPR108        | -0.1569      | -0.117166667 | -0.1974      | -0.005733333 |
| CCNI          | -0.361666667 | -0.199266667 | -0.028366667 | -0.152933333 |
| CALCOCO2      | -0.231866667 | -0.050166667 | -0.2421      | -0.0742      |
| LOC100129094  | -0.058333333 | -0.041133333 | 0.0035       | 0.0165       |
| FRYL          | 0.017766667  | 0.035833333  | -0.031966667 | 0.030633333  |
| TMEM231       | -0.172666667 | 0.0307       | -0.140033333 | -0.005366667 |
| NCOA5         | 0.0878       | 0.0477       | -0.138266667 | 0.2035       |
| PPIC          | -0.335433333 | -0.029266667 | -0.084333333 | -0.119       |
| HOXA10        | 0.0153       | -0.051866667 | -0.030666667 | 0.105        |
| MNT           | -0.5025      | -0.261033333 | -0.234766667 | -0.293466667 |
| VPS72         | -0.027433333 | -0.027166667 | -0.112433333 | 0.115766667  |
| TMEM154       | -0.011533333 | -0.048433333 | 0.000333333  | -0.004933333 |
| XRCC5         | 0.0682       | -0.169833333 | -0.102433333 | 0.066433333  |
| NUBP2         | -0.0255      | -0.1232      | 0.055266667  | 0.0513       |
| TOR3A         | -0.124533333 | -0.016166667 | 0.145166667  | 0.040233333  |

|              |              |              |              |              |
|--------------|--------------|--------------|--------------|--------------|
| PEX11G       | -0.272466667 | -0.1287      | -0.0594      | -0.078066667 |
| LOC791120    | -0.2621      | -0.312833333 | -0.094733333 | -0.083166667 |
| SEPHS1       | 0.1005       | -0.067566667 | -0.1514      | 0.1622       |
| MKRN3        | 0.049466667  | -0.228533333 | -0.037233333 | 0.191666667  |
| CTPS         | 0.0652       | 0.300166667  | 0.205933333  | 0.372333333  |
| MRPL50       | 0.1896       | 0.034833333  | 0.037566667  | 0.2553       |
| ZNF664       | -0.0589      | -0.093266667 | -0.0449      | 0.011266667  |
| RSL24D1      | -0.1262      | -0.132533333 | -0.161833333 | -0.0608      |
| WDR24        | -0.189933333 | -0.0253      | -0.194833333 | -0.005066667 |
| ERI2         | 0.0172       | -0.0512      | 0.0074       | 0.0084       |
| VAV2         | -0.1113      | -0.020033333 | -0.022633333 | 0.178666667  |
| RSRC2        | 0.18         | -0.144666667 | -0.059366667 | 0.226166667  |
| RANBP6       | 0.070133333  | 0.001433333  | -0.1403      | -0.0317      |
| RNF219       | -0.041866667 | 0.0866       | 0.058166667  | 0.144933333  |
| SEC14L1      | -0.042866667 | -0.195833333 | -0.0495      | 0.0515       |
| SLC46A3      | -0.074466667 | -0.178766667 | -0.046333333 | 0.088833333  |
| CMTM7        | 0.193433333  | 0.3568       | 0.558566667  | 0.4301       |
| FAM178A      | -0.118033333 | -0.017133333 | 0.045566667  | 0.070366667  |
| LOC100133800 | -0.064966667 | 0.388533333  | -0.019266667 | 0.1303       |
| FAM35A       | -0.037266667 | -0.014733333 | 0.004066667  | 0.123433333  |
| RAD50        | -0.1368      | -0.139966667 | -0.067333333 | -0.097733333 |
| CRKL         | 0.2299       | 0.0314       | -0.0706      | 0.126766667  |
| FCHSD2       | -0.120733333 | -0.021533333 | -0.048933333 | 0.108933333  |
| ZNF438       | -0.105033333 | -0.017633333 | 0.005266667  | 0.075566667  |
| NSUN2        | 0.229533333  | 0.061366667  | 0.1316       | 0.341666667  |
| C14orf159    | -0.113166667 | -0.164466667 | -0.207433333 | -0.062233333 |
| LOC100133876 | -0.057866667 | -0.1731      | -0.079433333 | -0.019566667 |
| FLJ42627     | -0.0665      | -0.105233333 | -0.095233333 | -0.024233333 |
| LOC730005    | -0.086033333 | -0.047166667 | -0.152666667 | -0.085666667 |
| STX2         | 0.241        | 0.131633333  | -0.053233333 | 0.213        |
| BCAS2        | -0.0719      | -0.042533333 | -0.131266667 | -0.028666667 |
| LOC100128805 | 0.012666667  | 0.143633333  | 0.0217       | 0.122666667  |
| ANKDD1A      | -0.3338      | -0.196933333 | 0.1562       | -0.097566667 |
| TUBGCP4      | -0.024866667 | 0.2041       | -0.027966667 | 0.143766667  |
| LLPH         | 0.036633333  | 0.099166667  | 0.006433333  | 0.123733333  |
| SMCR5        | -0.211766667 | 0.058733333  | 0.083166667  | -0.081733333 |
| VAC14        | -0.117033333 | -0.1679      | -6.67E-05    | 0.050633333  |
| HEMK1        | -0.1243      | -0.135933333 | -0.3003      | -0.09        |
| LOC729148    | 0.027533333  | -0.151       | -0.1487      | -0.012966667 |
| RNASEH2C     | -0.020233333 | -0.077633333 | -0.006533333 | 0.122433333  |
| CUGBP1       | 0.051366667  | 0.2949       | -0.009166667 | 0.125166667  |
| LOC653297    | -0.2211      | -0.144233333 | -0.1282      | -0.140433333 |
| LEMD3        | 0.066033333  | -0.082       | -0.139366667 | 0.024966667  |
| LIG4         | -0.153366667 | 0.056133333  | -0.073233333 | -0.010166667 |
| MFI2         | -0.135666667 | -0.207633333 | 0.150366667  | 0.1038       |
| ZNF304       | -0.056066667 | -0.0815      | -0.1465      | 0.1224       |
| RFC2         | 0.1033       | 0.0831       | 9.00E-04     | 0.1859       |

|              |              |              |              |              |
|--------------|--------------|--------------|--------------|--------------|
| LOC90120     | 0.001566667  | -0.110766667 | -0.0911      | 0.059833333  |
| STK16        | -0.169866667 | -0.177333333 | -0.267333333 | -0.0145      |
| AMY1C        | -0.071866667 | -0.0976      | 0.013766667  | 0.096533333  |
| WDR77        | 0.155633333  | 0.2013       | 0.0325       | 0.2733       |
| LOC642076    | -0.047733333 | 0.046533333  | -0.318566667 | -0.187633333 |
| LOC100133692 | -0.207833333 | 0.162933333  | -0.1936      | -0.044466667 |
| LOC100129297 | -0.024466667 | -0.162066667 | -0.085033333 | 0.114066667  |
| AMFR         | -0.1315      | -0.140266667 | -0.1193      | -0.066066667 |
| GDE1         | -0.1997      | -0.164366667 | -0.092666667 | -0.070133333 |
| C14orf28     | -0.131       | -0.049833333 | -0.168266667 | -0.0388      |
| FNDC3A       | 0.0153       | -0.034666667 | 0.1777       | 0.167366667  |
| LOC652330    | -0.150466667 | 0.022833333  | 0.065833333  | -0.164466667 |
| BRD7P2       | -0.099       | -0.155266667 | -0.0256      | 0.015966667  |
| MTMR15       | -0.134166667 | 0.0577       | -0.0564      | 0.095033333  |
| AAMP         | -0.105266667 | -0.101666667 | -0.048933333 | 0.094066667  |
| PARD6A       | -0.1579      | -0.072966667 | -0.1612      | -0.081033333 |
| LOC100133329 | -0.388966667 | -0.181166667 | -0.490066667 | -0.319       |
| SENP3        | 0.0793       | -0.0416      | 0.0503       | 0.239033333  |
| LSM14B       | -0.035133333 | 0.0065       | -0.153766667 | 0.007033333  |
| STX12        | -0.119966667 | -0.0858      | -0.189733333 | -0.044033333 |
| DNAJC18      | -0.337366667 | -0.156566667 | -0.0529      | -0.163566667 |
| LARP4        | 0.035166667  | 0.201666667  | -0.067366667 | 0.1655       |
| ANP32A       | -0.1524      | 0.044033333  | -0.087166667 | -0.097666667 |
| ID2B         | -0.014733333 | -0.147166667 | -0.012233333 | 0.077766667  |
| SLC9A8       | -0.192133333 | -0.160866667 | -0.063966667 | 0.023533333  |
| H2AFX        | 0.144733333  | -0.034366667 | -0.0549      | 0.1427       |
| LOC642897    | -0.0907      | 0.0384       | -0.027633333 | 0.004133333  |
| BMI1         | -0.2123      | -0.2541      | -0.285133333 | -0.0873      |
| TERF2IP      | 0.000766667  | -0.110133333 | -0.0493      | 0.152266667  |
| MCEE         | -0.1835      | -0.224466667 | -0.3902      | -0.232766667 |
| SLC35E1      | -0.162866667 | 0.0004       | -0.0327      | -0.037966667 |
| LOC652481    | -0.0098      | -0.123266667 | 0.109166667  | 0.097166667  |
| SNORA67      | 0.096133333  | -0.014866667 | 0.067        | 0.187533333  |
| FTSJ2        | -0.045233333 | 0.1399       | 0.005666667  | 0.1197       |
| LOC100132513 | -0.021166667 | -0.0665      | 0.005433333  | 0.013366667  |
| LOC100133542 | -0.047733333 | -0.060566667 | -0.020933333 | 0.0343       |
| POLS         | 0.3017       | 0.099733333  | 0.050033333  | 0.3154       |
| HIST2H2BF    | -0.0152      | 0.054133333  | -0.083866667 | 0.1111       |
| SF3B5        | 0.002033333  | -0.086433333 | -0.021466667 | 0.180866667  |
| ZER1         | -0.004133333 | -0.1688      | -0.077166667 | 0.085466667  |
| FTSJ3        | 0.0896       | -0.040166667 | -0.0465      | 0.117166667  |
| VWA5A        | -0.2525      | -0.191466667 | 0.0395       | -0.028966667 |
| BNIP2        | -0.0322      | -0.243233333 | -0.0965      | 0.04         |
| BP75         | -0.017166667 | -0.062733333 | 0.0528       | 0.174633333  |
| IKZF4        | -0.209033333 | -0.130066667 | -0.202033333 | -0.022533333 |
| ZNF350       | -0.133533333 | -0.1527      | -0.1175      | -0.0401      |
| SFRS12       | -0.124166667 | -0.228333333 | -0.205833333 | -0.082266667 |

|              |              |              |              |              |
|--------------|--------------|--------------|--------------|--------------|
| ZNF133       | -0.106633333 | -0.241166667 | -0.214333333 | -0.003366667 |
| CEP78        | -0.043533333 | 0.012233333  | 0.0996       | 0.059466667  |
| TLK1         | -0.056333333 | -0.1624      | -0.0707      | 0.070133333  |
| CSNK1A1      | -0.241233333 | -0.007933333 | 0.1358       | -0.045766667 |
| PHF20        | -0.125       | -0.004066667 | -0.143366667 | -0.0981      |
| TOP1         | 0.230333333  | 0.260766667  | 0.138833333  | 0.4396       |
| RBM47        | -0.1407      | -0.116566667 | 0.049433333  | 0.073966667  |
| LOC100132493 | -0.145733333 | 0.027933333  | -0.2663      | -0.1209      |
| RTEL1        | -0.028833333 | -0.093066667 | -0.016133333 | -0.074833333 |
| PLP2         | 0.274433333  | 0.109766667  | -0.226566667 | 0.2246       |
| GGTLC1       | -0.0502      | 0.011466667  | 0.0279       | 0.176        |
| ALDOC        | 0.0338       | -0.149766667 | -0.0085      | 0.0091       |
| LOC649873    | -0.152866667 | 0.064266667  | -0.248033333 | 0.0192       |
| LOC649445    | -0.025766667 | -0.017033333 | -0.1748      | -0.043533333 |
| HIP1         | -0.169633333 | -0.0704      | -0.1085      | -0.059733333 |
| EPN1         | -0.050033333 | -0.064666667 | -0.1349      | 0.0564       |
| DVL1         | 0.0567       | 0.099366667  | 0.095533333  | 0.0762       |
| APP          | -0.103566667 | -0.285566667 | -0.213033333 | -0.069266667 |
| LOC100133719 | -0.143033333 | -0.083166667 | -0.230333333 | -0.1475      |
| PWWP2A       | -0.012366667 | -0.079366667 | -0.150533333 | 0.1223       |
| C5orf34      | 0.0567       | -0.006066667 | 0.0005       | 0.166033333  |
| ANO8         | -0.0802      | -0.013033333 | -0.217333333 | -0.090633333 |
| GABARAP      | 0.054966667  | -0.185733333 | -0.209333333 | -0.0162      |
| LOC727818    | -0.024133333 | -0.033466667 | -0.002933333 | 0.099733333  |
| POFUT1       | -0.129433333 | 0.080933333  | 0.061533333  | 0.104966667  |
| LGALS3BP     | -0.167666667 | -0.252866667 | -0.106866667 | -0.050233333 |
| FAT1         | 0.208466667  | -0.216566667 | -0.521366667 | -0.246566667 |
| HSPC268      | -0.193       | 0.2101       | 0.147        | 0.0437       |
| RPS7         | 0.1667       | -0.020466667 | -0.131533333 | 0.116133333  |
| LOC100130233 | -0.731933333 | -0.0036      | -0.8052      | -0.6606      |
| PIN4         | -0.1595      | -0.0973      | -0.1738      | -0.0175      |
| LOC389662    | -0.0173      | -0.0823      | -0.101833333 | -0.065133333 |
| CLEC2D       | -0.0051      | -0.122966667 | -0.061733333 | 0.0143       |
| RALB         | 0.1687       | -0.051766667 | 0.2128       | 0.322333333  |
| MRPL14       | 0.0974       | 0.120833333  | -0.0634      | 0.176733333  |
| CMC1         | 0.070166667  | 0.094466667  | 0.008066667  | 0.157833333  |
| TTC8         | -0.1382      | -0.299566667 | -0.064433333 | 0.0293       |
| C6orf153     | 0.053766667  | 0.052866667  | 0.005866667  | 0.1244       |
| LOC728992    | -0.074733333 | -0.005466667 | -0.0834      | -0.069966667 |
| LOC728576    | -0.081033333 | -0.1048      | 0.0227       | 0.102966667  |
| LOC728908    | 0.138733333  | 0.0189       | 0.212266667  | 0.2754       |
| ATF1         | -0.011966667 | 0.0141       | -0.109566667 | 0.094166667  |
| MAPRE3       | -0.175166667 | -0.048066667 | -0.1182      | -0.0584      |
| IL17RD       | -0.2471      | 0.045866667  | 0.0171       | -0.216233333 |
| PPARD        | -0.217566667 | -0.079666667 | -0.094533333 | 0.027533333  |
| COPS3        | 0.047066667  | -0.027266667 | -0.0535      | 0.218833333  |
| LOC729348    | -0.157966667 | 0.014266667  | -0.097533333 | -0.1277      |



|               |              |              |              |              |
|---------------|--------------|--------------|--------------|--------------|
| TERF2         | -0.100933333 | -0.0596      | -0.1166      | 0.029433333  |
| SNORA70       | 0.045733333  | -0.0208      | -0.0487      | -0.017533333 |
| CDH12         | -0.113866667 | 0.026333333  | -0.097466667 | 0.087666667  |
| OXSM          | 0.001133333  | -0.065166667 | -0.1531      | 0.1628       |
| CREB3L2       | 0.275633333  | 0.128833333  | -0.152333333 | 0.040933333  |
| ZSCAN21       | -0.135766667 | -0.2073      | -0.138       | -0.0801      |
| PFDN6         | -0.078366667 | -0.102466667 | 0.021733333  | 0.023766667  |
| CSF2RA        | -0.351033333 | 0.004533333  | -0.0456      | -0.267066667 |
| ARMCX6        | -0.098566667 | -0.2902      | -0.215333333 | -0.1107      |
| LOC648622     | -0.1861      | -0.280833333 | -0.088466667 | 0.029566667  |
| C1orf31       | -0.019866667 | 0.0889       | -0.0397      | 0.130033333  |
| ZNF643        | -0.0059      | -0.010933333 | -0.248666667 | 0.093133333  |
| LOC100131835  | -0.0434      | 0.041166667  | -0.086566667 | 0.017033333  |
| LOC647450     | 0.091733333  | 0.121566667  | -0.0361      | 0.182866667  |
| LOC400304     | -0.164666667 | -0.219633333 | -0.1085      | -0.077766667 |
| ANKRD32       | 0.143366667  | 0.209466667  | 0.147133333  | 0.3038       |
| SNORA24       | -0.0608      | 0.0181       | 0.008        | 0.111533333  |
| LOC642817     | 0.152566667  | -0.198866667 | -0.080933333 | -0.0421      |
| LOC100131675  | -0.436333333 | 0.039033333  | -0.4023      | -0.396666667 |
| C8orf45       | -0.209366667 | -0.024033333 | 0.1244       | -0.155633333 |
| PTPDC1        | 0.138666667  | -0.016833333 | -0.119166667 | 0.1785       |
| FOXO3         | -0.124666667 | -0.166566667 | -0.162633333 | -0.0236      |
| C17orf42      | 0.0122       | 0.042833333  | -0.1915      | 0.207333333  |
| ZFR           | -0.147133333 | -0.011866667 | 0.050966667  | 0.062033333  |
| GOLGA4        | -0.023366667 | -0.0815      | 0.035366667  | 0.050833333  |
| FLJ22531      | -0.050033333 | -0.047333333 | 0.003333333  | 0.104        |
| LOC729264     | -0.366433333 | -0.340866667 | -0.0575      | -0.140066667 |
| NT5C3         | -0.031266667 | -0.089433333 | -0.039366667 | 0.113766667  |
| DEDD          | 0.027566667  | -0.158933333 | -0.126533333 | 0.071666667  |
| APPL1         | -0.061066667 | -0.138566667 | 0.0369       | -0.0189      |
| EXOC2         | -0.2029      | -0.165533333 | -0.076033333 | -0.072866667 |
| DKFZp667M2411 | -0.009933333 | -0.115433333 | -0.005133333 | 0.070066667  |
| LOC729101     | 0.022        | 0.115066667  | 0.005833333  | 0.163233333  |
| LOC647086     | -0.190166667 | -0.066166667 | 0.1701       | 0.0089       |
| LOC339804     | -0.2014      | -0.1768      | -0.3296      | -0.147033333 |
| ZNF354A       | -0.053166667 | -0.0087      | -0.118266667 | 0.1466       |
| RNMTL1        | 0.075133333  | 0.044333333  | -0.0345      | 0.150566667  |
| CASC3         | -0.0948      | -0.119433333 | -0.1015      | -0.034233333 |
| LOC100129758  | -0.0405      | -0.103133333 | -0.106833333 | 0.010866667  |
| SEC22A        | -0.101633333 | 0.043        | -0.043833333 | 0.109366667  |
| LOC643167     | -0.055066667 | -0.147266667 | -0.134366667 | -0.036166667 |
| STAT1         | -0.265066667 | -0.1893      | 0.0847       | 0.077733333  |
| THG1L         | -0.0753      | 0.0442       | -0.234366667 | 0.0309       |
| MYBL1         | 0.5773       | 0.1539       | 0.075633333  | 0.2564       |
| LOC653472     | 0.029866667  | -0.027566667 | -0.193066667 | 0.081733333  |
| PSME2         | -0.0848      | -0.055066667 | -0.029266667 | 0.031433333  |
| PARP16        | -0.2374      | -0.088566667 | -0.141666667 | -0.036433333 |

|           |              |              |              |              |
|-----------|--------------|--------------|--------------|--------------|
| LOC728787 | 0.092166667  | -0.014366667 | -0.129266667 | 0.001366667  |
| TACO1     | -0.045633333 | 0.02         | -0.005366667 | 0.1241       |
| TRIAP1    | -0.06        | 0.017733333  | -0.1029      | 0.030533333  |
| LOC653354 | 0.0042       | -0.1892      | -0.1518      | 0.016966667  |
| EXOSC7    | 0.101633333  | -0.008033333 | -0.112866667 | 0.1313       |
| XRN1      | -0.2589      | -0.193366667 | -0.025766667 | -0.168633333 |
| ALS2CR4   | 0.0639       | -0.000866667 | 0.096066667  | 0.156366667  |
| ZNF205    | -0.040533333 | -0.090033333 | -0.078933333 | -0.015033333 |
| BAP1      | -0.205233333 | -0.104       | -0.156633333 | -0.0103      |
| ZKSCAN2   | 0.020166667  | -0.0678      | -0.1567      | 0.101033333  |
| LOC401650 | -0.1071      | -0.113966667 | 0.112066667  | -0.008533333 |
| TIMM17B   | -0.126633333 | -0.0133      | -0.078266667 | 0.092833333  |
| FBXO30    | -0.021066667 | -0.205266667 | -0.156933333 | -0.078633333 |
| BMPR2     | 0.1722       | -0.1921      | -0.301933333 | -0.014666667 |
| SCARNA9   | -0.1777      | -0.2464      | -0.341966667 | -0.248633333 |
| UHRF1     | 0.407        | 0.513633333  | 0.022166667  | 0.409066667  |
| MAP2K3    | 0.547366667  | 0.323066667  | 0.0826       | 0.551166667  |
| ZNF524    | -0.256933333 | -0.0509      | -0.159166667 | -0.056733333 |
| RAB36     | -0.016966667 | 0.082266667  | -0.044466667 | 0.298066667  |
| LOC728774 | -0.394766667 | 0.0909       | -0.4341      | -0.197       |
| EIF2B1    | -0.043266667 | -0.1632      | -0.071766667 | 0.0021       |
| ANAPC7    | -0.010033333 | -0.0271      | 0.107166667  | 0.183933333  |
| THUMPD3   | -0.188833333 | -0.004033333 | 0.1113       | 0.025966667  |
| KIF23     | 0.544966667  | 0.049866667  | -0.2525      | 0.226166667  |
| UNKL      | -0.156066667 | -0.140166667 | -0.130366667 | -0.0222      |
| KIFC1     | 0.2488       | 0.214333333  | -0.1895      | 0.197633333  |
| C10orf118 | -0.1686      | -0.145266667 | -0.193866667 | -0.151066667 |
| ASS1      | -0.141266667 | -0.133166667 | -0.139733333 | -0.0532      |
| CRLF3     | 0.366666667  | 0.078333333  | 0.1342       | 0.3721       |
| PREX1     | 0.019166667  | 0.250666667  | 0.097966667  | 0.2047       |
| ANKRD52   | 0.0271       | -0.0687      | 0.0564       | 0.175933333  |
| PSMA4     | -0.0108      | -0.034       | -0.0824      | 0.142466667  |
| LOC729332 | -0.535433333 | 0.029        | -0.496933333 | -0.395166667 |
| TMEM63B   | -0.0461      | -0.101233333 | -0.157366667 | -0.0343      |
| PFAAP5    | -0.162333333 | -0.000166667 | 0.042866667  | 0.0154       |
| PPP1R7    | -0.240733333 | -0.141466667 | -0.093666667 | -0.0597      |
| MRPL3     | -0.1078      | 0.039066667  | -0.233066667 | 0.031966667  |
| RNF40     | 0.0613       | -0.0814      | -0.172633333 | 0.0771       |
| PIK3CA    | -0.127933333 | 0.127        | -0.152866667 | -0.0367      |
| FAM14B    | -0.087366667 | -0.0398      | -0.0602      | -0.1186      |
| FAM190B   | 0.0515       | -0.2603      | -0.1507      | 0.040566667  |
| ZFP161    | -0.1733      | -0.131366667 | -0.047333333 | -0.063766667 |
| GPR89C    | -0.0004      | -0.3322      | -0.157033333 | 0.0003       |
| C9orf103  | -0.1574      | -0.175733333 | -0.075266667 | -0.0456      |
| KIAA0101  | 0.020766667  | 0.015733333  | -0.112366667 | 0.109066667  |
| C16orf70  | 0.005066667  | -0.066233333 | -0.0163      | 0.096866667  |
| SLC35A3   | -0.1269      | -0.020666667 | -0.094233333 | -0.0324      |

|              |              |              |              |              |
|--------------|--------------|--------------|--------------|--------------|
| RAP1B        | 0.192133333  | -0.0029      | -0.050233333 | 0.0465       |
| ETFDH        | -0.326466667 | -0.116966667 | -0.0241      | -0.219666667 |
| FKBP1A       | 0.117833333  | 0.057166667  | -0.0176      | 0.228133333  |
| PHF5A        | 0.100333333  | 0.033033333  | -0.1314      | 0.170566667  |
| IL10         | -0.378933333 | -0.039       | -0.055966667 | -0.218966667 |
| OBFC2B       | -0.072966667 | 0.0221       | -0.076733333 | -0.001433333 |
| LOC728666    | 0.115566667  | -0.065766667 | 0.0822       | 0.112433333  |
| LOC100132795 | -0.0617      | -0.3585      | -0.0854      | -0.0645      |
| COMMD10      | -0.3197      | -0.076633333 | -0.0595      | -0.047833333 |
| LOC100128126 | -0.271433333 | 0.102233333  | -0.032666667 | -0.1079      |
| MBTD1        | -0.2116      | 0.147566667  | -0.009866667 | 0.003266667  |
| GGA3         | -0.100333333 | 0.015033333  | -0.141366667 | 0.0021       |
| C10orf61     | -0.069966667 | -0.090366667 | -0.003466667 | -0.042733333 |
| NPEPL1       | -0.2284      | -0.262133333 | 0.0472       | -0.100566667 |
| LOC100128689 | 0.1486       | 0.057666667  | 0.040566667  | 0.173666667  |
| C4orf48      | -0.173733333 | -0.170133333 | -0.096633333 | -0.021       |
| EPHA10       | -0.000433333 | -0.143833333 | 0.016933333  | 0.011066667  |
| PLA2G2C      | -0.0251      | -0.034766667 | -0.2106      | 0.0531       |
| CYCSP52      | -0.008066667 | 0.0301       | 0.096633333  | 0.1825       |
| PBRM1        | 0.2003       | 0.053666667  | 0.121566667  | 0.189333333  |
| CNRIP1       | 0.0488       | 0.052433333  | 0.0971       | 0.0775       |
| ANKRD30B     | -0.1199      | 0.0101       | 0.0184       | -0.088066667 |
| LENG1        | 0.141733333  | 0.0287       | 0.1039       | 0.223633333  |
| LOC729366    | -0.0163      | 0.0205       | -0.2221      | 0.042366667  |
| BOLA2        | 0.1918       | 0.1718       | -0.044133333 | 0.140466667  |
| TMEM116      | -0.400033333 | -0.127733333 | -0.018333333 | -0.110433333 |
| CCDC25       | -0.229933333 | -0.204266667 | -0.116833333 | -0.114766667 |
| HIST1H3E     | 0.002333333  | -0.1078      | -0.073933333 | 0.149833333  |
| C14orf101    | -0.1956      | -0.144733333 | -0.103766667 | -0.100266667 |
| ZNF223       | -0.243966667 | 0.07         | -0.026366667 | -0.2688      |
| RMND5B       | -0.073033333 | -0.117533333 | 0.013533333  | 0.1112       |
| RASA2        | 0.1503       | 0.014066667  | 0.124466667  | 0.265766667  |
| MGC5139      | 0.004733333  | -0.071766667 | -0.069366667 | -0.074333333 |
| MTF1         | 0.051166667  | 0.058633333  | -0.0347      | 0.2412       |
| WHSC2        | 0.081566667  | -0.100933333 | 0.1231       | 0.158933333  |
| LOC100128836 | -0.039       | -0.2098      | -0.1521      | -0.0821      |
| SCAF1        | -0.012633333 | 0.019633333  | -0.054166667 | 0.131633333  |
| LOC100128203 | -0.005433333 | -0.1652      | 0.094433333  | 0.035733333  |
| LOC100132909 | -0.0911      | -0.029633333 | 0.017466667  | 0.059433333  |
| ITGB3        | 0.043133333  | -0.0876      | 0.0714       | 0.003433333  |
| N4BP2        | -0.135166667 | -0.0403      | -0.051066667 | -0.058366667 |
| LPGAT1       | -0.1576      | -0.0511      | 0.022833333  | 0.106133333  |
| LOC100129028 | -0.162966667 | -0.025133333 | -0.206266667 | -0.0157      |
| TARBP2       | -0.038466667 | -0.012833333 | 0.059366667  | 0.082266667  |
| RQCD1        | 0.064866667  | 0.060266667  | -0.051266667 | 0.149766667  |
| HSPA13       | -0.063733333 | 0.0118       | -0.2838      | -0.0644      |
| COL4A2       | 0.024266667  | -0.165133333 | -0.1311      | 0.085        |

|               |              |              |              |              |
|---------------|--------------|--------------|--------------|--------------|
| LOC441050     | 0.354566667  | -0.019633333 | -0.035166667 | 0.198733333  |
| SNORA41       | 0.034033333  | -0.086066667 | 0.075733333  | 0.1416       |
| ELAC2         | 0.136866667  | 0.149366667  | 0.073766667  | 0.1946       |
| LOC728368     | -0.175066667 | 0.032        | -0.1982      | -0.087233333 |
| LOC642236     | -0.210433333 | -0.156366667 | -0.0474      | -0.0844      |
| LOC100133697  | 0.110466667  | 0.1113       | -0.133366667 | 0.051766667  |
| ACOT9         | 0.1274       | 0.105266667  | -0.1118      | 0.1797       |
| LATS2         | 0.299166667  | -0.0357      | -0.127033333 | 0.1237       |
| FLYWCH2       | -0.088233333 | -0.035533333 | -0.044266667 | 0.141233333  |
| SNORD3D       | -0.0802      | -0.046033333 | -0.3441      | -0.1895      |
| PIM2          | 0.1182       | -0.0208      | 0.028733333  | 0.019033333  |
| AAK1          | -0.118066667 | 0.311566667  | -0.0197      | -0.038233333 |
| EVI5L         | -0.380433333 | -0.183733333 | -0.011466667 | -0.152366667 |
| DKFZP586I1420 | -0.025066667 | -0.147366667 | -0.2061      | 0.046466667  |
| PTGES3        | 0.025566667  | 0.1036       | -0.054266667 | 0.0127       |
| TPRKB         | 0.0215       | 0.2176       | -0.0965      | 0.1871       |
| C15orf44      | 0.0411       | -0.1005      | -0.0102      | 0.097666667  |
| LILRB1        | -0.255966667 | -0.0415      | 0.006133333  | -0.1407      |
| PDCD5         | 0.191366667  | 0.0219       | -0.047733333 | 0.172866667  |
| CYFIP1        | -0.0507      | -0.0745      | 0.083566667  | 0.0576       |
| CXorf40B      | 0.056166667  | -0.0877      | -0.24        | 0.118933333  |
| DCTN4         | -0.224633333 | -0.100566667 | -0.2029      | 0.007433333  |
| USP22         | -0.158966667 | -0.0148      | -0.068333333 | 0.000766667  |
| PSMD14        | 0.104633333  | 0.048766667  | -0.197333333 | 0.1386       |
| RABL2B        | -0.187533333 | -0.222066667 | -0.080966667 | -0.024133333 |
| LOC648494     | 0.032233333  | -0.0936      | -0.026066667 | -0.059866667 |
| C7orf42       | 0.076733333  | 0.008066667  | -0.075566667 | 0.0423       |
| LOC642210     | -0.057933333 | -0.077666667 | -0.065666667 | 0.0216       |
| EXOC8         | -0.087366667 | -0.070233333 | -0.029166667 | 0.077333333  |
| RPAP1         | 0.097066667  | 0.012666667  | -0.0511      | 0.1181       |
| TALDO1        | -0.175433333 | -0.1313      | -0.093633333 | 0.013066667  |
| ZNF514        | -0.053033333 | -0.171766667 | -0.2105      | 0.040066667  |
| TMEM1         | 0.0092       | 0.1735       | -0.092133333 | 0.1352       |
| KLC4          | 0.084133333  | 0.044766667  | -0.1677      | 0.1746       |
| RABL2A        | -0.0878      | -0.231933333 | -0.2498      | -0.082433333 |
| THAP11        | -0.0771      | 0.016133333  | -0.226       | 0.026066667  |
| LOC645387     | -0.012066667 | -0.152333333 | -0.165733333 | -0.062833333 |
| TTC1          | -0.026066667 | -0.0017      | 0.0671       | 0.153666667  |
| EMG1          | 0.079466667  | 0.1757       | -0.046333333 | 0.240266667  |
| GGA1          | -0.026       | -0.115033333 | -0.132633333 | -0.074666667 |
| LOC100131727  | -0.1139      | -0.1912      | -0.1737      | -0.1155      |
| MIR635        | -0.2076      | -0.0434      | 0.051066667  | 0.052166667  |
| LOC651894     | -0.196866667 | -0.162133333 | -0.078166667 | -0.0575      |
| CENPT         | 0.0691       | 0.101466667  | -0.169666667 | 0.1201       |
| PDE4C         | -0.232866667 | 0.0177       | 0.1886       | -0.0653      |
| TMEM141       | -0.300366667 | -0.178333333 | 0.077166667  | -0.111766667 |
| FAM48A        | -0.0498      | 0.077966667  | -0.058366667 | 0.006        |

|              |              |              |              |              |
|--------------|--------------|--------------|--------------|--------------|
| MAF1         | -0.050533333 | -0.119833333 | -0.083166667 | 0.0699       |
| LOC100130818 | -0.017733333 | -0.119566667 | 0.042533333  | 0.241566667  |
| TUBB6        | 0.221833333  | 0.084233333  | -0.022933333 | 0.188166667  |
| LOC100128440 | -0.053166667 | 0.005533333  | 0.039        | 0.192266667  |
| TSC22D4      | -0.082333333 | -0.2073      | -0.085966667 | -0.065966667 |
| CERCAM       | -0.124166667 | -0.030466667 | -0.192333333 | -0.048533333 |
| TRPM2        | 0.032433333  | 0.178033333  | 0.021033333  | 0.237033333  |
| LOC643995    | 0.074966667  | 0.047533333  | -0.080066667 | 0.049166667  |
| SLC39A1      | -0.135966667 | 0.077433333  | 0.0413       | -0.003666667 |
| ST13         | -0.300266667 | -0.353933333 | -0.1722      | -0.195966667 |
| OR11H1       | -0.068833333 | -0.019966667 | -0.091166667 | 0.0482       |
| ZSWIM1       | -0.036566667 | -0.142833333 | -0.1652      | -0.027066667 |
| ATG3         | -0.117933333 | 0.115733333  | 0.164        | 0.213566667  |
| PPP2R5E      | -0.020433333 | 0.159833333  | 0.016133333  | 0.006833333  |
| LOC653820    | 0.246766667  | 0.067566667  | -0.101633333 | 0.148233333  |
| LOC100130938 | 0.0727       | 0.089866667  | -0.0687      | 0.1269       |
| ATL1         | 0.119766667  | -0.143066667 | -0.3164      | -0.040333333 |
| ZNF579       | 0.003833333  | -0.063466667 | -0.112266667 | 0.057566667  |
| ADH5         | 0.0261       | -0.2136      | -0.090033333 | 0.0245       |
| URM1         | -0.0271      | 0.044033333  | -0.042666667 | 0.157066667  |
| SLC25A1      | -0.2799      | -0.178933333 | 0.000633333  | -0.156466667 |
| SARM1        | -0.2583      | -0.066       | -0.096666667 | 0.047333333  |
| LOC647436    | -0.212533333 | -0.137933333 | -0.021666667 | -0.169966667 |
| LMAN2        | -0.169466667 | -0.181466667 | -0.033833333 | 0.005633333  |
| FBXL12       | -0.063       | -0.1139      | -0.179566667 | 0.07         |
| RPRD1B       | -0.020366667 | -0.0046      | 0.1438       | 0.191633333  |
| TRIM37       | -0.041833333 | -0.2538      | 0.0285       | -0.008466667 |
| MAK10        | -0.029       | -0.0506      | -0.080933333 | 0.010066667  |
| LOC647307    | -0.309966667 | -0.078233333 | -0.347633333 | -0.156033333 |
| GTF2H3       | -0.054166667 | -0.036566667 | -0.0591      | -0.026633333 |
| FUT11        | 0.1313       | 0.0774       | -0.044366667 | 0.036        |
| ZNF783       | -0.052766667 | -0.2163      | -0.051533333 | -0.0718      |
| LEAP2        | -0.167033333 | 0.2084       | -0.2076      | 0.003633333  |
| CCDC28A      | -0.288033333 | -0.3101      | -0.308233333 | -0.1977      |
| RASA3        | 0.046566667  | 0.105        | 0.059        | 0.1845       |
| LOC100132199 | -0.319366667 | -0.1713      | -0.1881      | -0.188666667 |
| JMJD4        | -0.013666667 | -0.068433333 | -0.0764      | 0.023966667  |
| CFL2         | 0.055633333  | -0.1668      | -0.1034      | -0.006433333 |
| LOC100131971 | 0.050566667  | 0.032566667  | -0.011466667 | 0.132533333  |
| SLC30A6      | 0.0209       | 0.190666667  | -0.159666667 | 0.051933333  |
| BAT1         | 0.074166667  | 0.017666667  | 0.047633333  | 0.135233333  |
| LOC648196    | -0.050333333 | 0.020666667  | -0.087233333 | 0.111633333  |
| MRPL38       | 0.023033333  | -0.059733333 | -0.151666667 | 0.0706       |
| RAB7L1       | -0.241166667 | -0.0829      | -0.1521      | -0.0854      |
| IL10RB       | -0.205566667 | -0.003       | -0.105866667 | -0.097       |
| C4orf32      | -0.035233333 | -0.1363      | 0.058233333  | 0.050766667  |
| LOC644482    | -0.2389      | -0.163366667 | -0.0176      | -0.0513      |

|              |              |              |              |              |
|--------------|--------------|--------------|--------------|--------------|
| TRAIP        | 0.038033333  | 0.044933333  | -0.051133333 | 0.1654       |
| ACSF2        | -0.343966667 | -0.2444      | 0.0263       | -0.152833333 |
| BID          | 0.1345       | -0.0954      | -0.035733333 | 0.1192       |
| RNF44        | -0.176233333 | -0.0517      | -0.039966667 | -0.090366667 |
| C3orf64      | 0.126566667  | -0.031433333 | 0.098133333  | 0.258366667  |
| LOC731365    | -0.142366667 | 0.0268       | -0.080666667 | 0.0238       |
| CYP27B1      | 0.0375       | -0.0507      | -0.0371      | 0.145633333  |
| AFTPH        | 0.016333333  | -0.122033333 | -0.2348      | 0.0588       |
| SBF2         | -0.103066667 | -0.105533333 | -0.114       | -0.060966667 |
| UBR4         | -0.070133333 | -0.262233333 | -0.111866667 | -0.100333333 |
| TSTD2        | -0.059866667 | 0.003866667  | -0.119233333 | -0.083333333 |
| FAM195B      | -0.0954      | -0.173666667 | -0.090266667 | 0.1084       |
| C6orf173     | 0.106166667  | 0.129066667  | 0.074566667  | 0.175066667  |
| HCST         | -0.173666667 | -0.093766667 | -0.1044      | -0.0834      |
| MGC15763     | 0.0213       | -0.039466667 | -0.092366667 | 0.082266667  |
| LOC100133242 | -0.059666667 | -0.0883      | -0.090833333 | 0.0352       |
| CBX3         | 0.060433333  | 0.093566667  | -0.029166667 | 0.064633333  |
| LOC100133080 | -0.173733333 | -0.142166667 | -0.209233333 | -0.089066667 |
| UBE2N        | 0.0037       | 0.085566667  | 0.113733333  | 0.154033333  |
| LAMP1        | -0.222433333 | -0.256533333 | -0.124033333 | -0.126866667 |
| DMXL2        | -0.0603      | -0.142       | 0.024233333  | 0.1166       |
| LOC100129608 | -0.0681      | -0.087266667 | -0.043066667 | 0.1707       |
| LOC649209    | -0.285733333 | 0.061666667  | -0.097533333 | -0.217466667 |
| LOC100131360 | -0.070133333 | 0.112533333  | -0.030066667 | 0.061533333  |
| LOC390298    | -0.108666667 | 0.043366667  | -0.075633333 | 0.003733333  |
| UTX          | -0.006633333 | -0.1134      | -0.090166667 | -0.082533333 |
| TMEM59       | -0.263566667 | -0.218566667 | 0.005066667  | -0.061933333 |
| SAPS1        | 0.160733333  | 0.0331       | -0.130333333 | 0.1082       |
| TOMM70A      | -0.0718      | -0.0303      | -0.024333333 | 0.0603       |
| ERI3         | -0.161566667 | -0.0499      | -0.082966667 | -0.017933333 |
| LOC654121    | 0.145633333  | 0.0878       | 0.076933333  | 0.224433333  |
| FLII         | 0.004366667  | -0.014266667 | -0.0543      | 0.0776       |
| ZNF611       | -0.1339      | 0.039066667  | -0.139266667 | -0.036766667 |
| NFAT5        | -0.074       | -0.029933333 | 0.0854       | -0.0088      |
| CARKD        | -0.089466667 | -0.012166667 | -0.1802      | 0.049466667  |
| FAM53A       | -0.180566667 | -0.004866667 | -0.2414      | -0.118733333 |
| UBE2V2       | -0.080333333 | 0.1078       | -0.070933333 | -0.0062      |
| ATXN1L       | 0.0169       | -0.185033333 | -0.050833333 | 0.045533333  |
| ZNF324B      | -0.178966667 | -0.079733333 | 0.1238       | 0.094333333  |
| COMMD3       | -0.246066667 | -0.109533333 | -0.063566667 | -0.0354      |
| LOC388474    | -0.157866667 | -0.015233333 | -0.030966667 | 0.0198       |
| NCAN         | 0.101        | -0.143933333 | -0.077966667 | 0.181566667  |
| C17orf53     | 0.080766667  | 0.022733333  | -0.0143      | 0.166733333  |
| LOC100128533 | 0.0227       | -0.028466667 | -0.054866667 | 0.068666667  |
| KCNK3        | -0.0066      | -0.0467      | 0.081333333  | 0.0722       |
| dJ341D10.1   | 0.078266667  | -0.063866667 | 0.002666667  | 0.165633333  |
| ZNF813       | -0.162133333 | 0.0198       | -0.079433333 | 0.032666667  |

|              |              |              |              |              |
|--------------|--------------|--------------|--------------|--------------|
| MGC27345     | 0.153566667  | -0.011866667 | -0.079733333 | 0.149933333  |
| KATNAL1      | 0.2532       | 0.068933333  | 0.029833333  | 0.151933333  |
| LOC645231    | -0.326133333 | 0.0773       | -0.285066667 | -0.290466667 |
| C18orf32     | -0.200533333 | -0.199433333 | -0.101433333 | -0.154133333 |
| VAPA         | 0.0963       | -0.143833333 | -0.0564      | 0.061166667  |
| BIRC2        | 0.344766667  | 0.077766667  | -0.0325      | 0.113066667  |
| PMS2L5       | -0.049266667 | -0.094833333 | -0.058233333 | 0.0684       |
| LOC646920    | -0.049366667 | -0.035733333 | -0.025833333 | 0.0236       |
| SCLT1        | -0.054066667 | 0.005633333  | -0.0304      | 0.171533333  |
| LOC100128274 | -0.1752      | -0.0154      | -0.093066667 | -0.1551      |
| LOC727732    | 0.026966667  | -0.007733333 | -0.0225      | 0.102366667  |
| LOC653487    | -0.192033333 | 0.000633333  | -0.042766667 | 0.090833333  |
| POLR2I       | -0.013666667 | -0.072766667 | -0.053466667 | 0.039733333  |
| CEP152       | -0.172433333 | 0.1909       | 0.031433333  | 0.042466667  |
| FAM116B      | -0.248266667 | -0.1557      | -0.177166667 | -0.066966667 |
| C2orf68      | -0.1723      | -0.172766667 | -0.175666667 | -0.039433333 |
| LOC653079    | 0.002933333  | -0.1096      | -0.002633333 | 0.036433333  |
| ZNF430       | -0.242033333 | 0.0693       | 0.1418       | -0.049933333 |
| PFN1         | 0.161266667  | 0.0607       | -0.1655      | 0.118833333  |
| LOC653515    | -0.008933333 | -0.0219      | 0.002566667  | 0.096066667  |
| LOC255167    | -0.225066667 | 0.061        | 0.081133333  | -0.034166667 |
| LOC649555    | 0.285466667  | 0.2717       | 0.150566667  | 0.2301       |
| PAPD5        | 0.032066667  | 0.135366667  | -0.0358      | 0.1383       |
| CDKN2AIPNL   | -0.063333333 | 0.221233333  | 0.210966667  | 0.153033333  |
| KIAA1666     | -0.1885      | -0.001133333 | -0.167733333 | -0.145533333 |
| LOC654155    | -0.090266667 | -0.0886      | 0.087033333  | 0.172533333  |
| FLJ43681     | -0.246833333 | -0.097633333 | -0.255833333 | -0.109933333 |
| LOC100131868 | -0.0206      | 0.1434       | 0.175766667  | 0.2221       |
| LOC286444    | 0.0148       | -0.1859      | -0.0299      | 0.0126       |
| RIPK1        | -0.032333333 | -0.153933333 | -0.0305      | 0.0523       |
| PRICKLE2     | -0.260333333 | -0.161233333 | -0.0513      | -0.121666667 |
| CDKN2A       | -0.063466667 | 0.0224       | 0.1452       | 0.068066667  |
| SPANXD       | -0.1098      | -0.045666667 | 0.014233333  | 0.057066667  |
| LOC100130008 | 0.152366667  | -0.0738      | -0.045233333 | 0.1619       |
| TFAMP1       | -0.077666667 | -0.064833333 | 0.029833333  | 0.0827       |
| RBL2         | -0.2743      | -0.201066667 | 0.069766667  | -0.181466667 |
| SNX1         | -0.102       | -0.081933333 | 0.054533333  | 0.046533333  |
| CXorf40A     | 0.056266667  | -0.1338      | -0.233333333 | 0.077566667  |
| SCAMP4       | -0.149       | 0.088666667  | -0.0966      | 0.021866667  |
| MFSD11       | -0.287333333 | 0.117733333  | -0.118666667 | -0.1003      |
| LOC100130775 | -0.3169      | -0.1304      | -0.252833333 | -0.1296      |
| C20orf127    | -0.054666667 | 0.055433333  | -0.065766667 | 0.109933333  |
| FBXW11       | 0.0453       | -0.067766667 | -0.080733333 | 0.005566667  |
| C3orf60      | -0.072266667 | -0.200733333 | -0.0118      | -0.162633333 |
| ZSCAN5A      | 0.139        | 0.111966667  | -0.072866667 | 0.211733333  |
| TRIM3        | -0.109966667 | 0.015333333  | -0.016533333 | 0.151233333  |
| LOC653352    | 0.069833333  | -0.0426      | -0.1522      | 0.0914       |

|               |              |              |              |              |
|---------------|--------------|--------------|--------------|--------------|
| RCOR3         | -0.176166667 | -0.240333333 | -0.316166667 | -0.088866667 |
| EIF2AK4       | 0.0336       | 0.118966667  | -0.062433333 | -0.014166667 |
| CENPQ         | -0.037633333 | -0.103333333 | 0.070533333  | 0.042366667  |
| MED21         | -0.072266667 | 0.066066667  | -0.062533333 | 0.098        |
| TTC32         | 0.156633333  | -0.084933333 | -0.1025      | 0.2165       |
| MAPK11        | -0.002733333 | -0.071366667 | -0.0614      | -0.044133333 |
| LYPLA2        | 0.207366667  | -0.044533333 | -0.023066667 | 0.100733333  |
| C7orf70       | -0.2258      | -0.183933333 | -0.231433333 | -0.061466667 |
| LOC644037     | -0.084433333 | -0.007366667 | -0.19        | -0.0973      |
| SSBP3         | -0.119766667 | -0.139666667 | -0.168833333 | -0.158866667 |
| ZNF473        | 0.059866667  | -0.172966667 | 0.031266667  | 0.057066667  |
| CCNJL         | 0.188        | 0.056266667  | -0.042666667 | 0.208766667  |
| LOC100134407  | 0.1506       | -0.135466667 | -0.080733333 | 0.075933333  |
| SEPSECS       | -0.1911      | -0.029633333 | -0.136533333 | -0.055766667 |
| MSX2          | -0.053666667 | -0.0521      | -0.019833333 | 0.188166667  |
| MANBAL        | -0.0718      | 0.107066667  | -0.153866667 | 0.114        |
| IPO5          | -0.076433333 | -0.055533333 | 0.018766667  | -0.109466667 |
| GPN1          | 0.0876       | -0.008433333 | -0.1458      | 0.089333333  |
| PATE3         | 0.265933333  | 0.107233333  | 0.035033333  | 0.236766667  |
| DKFZP686E2158 | 0.0007       | 0.031066667  | 0.045866667  | 0.1503       |
| HNRNPA0       | -0.1448      | -0.0843      | -0.0929      | -0.174266667 |
| ACAD8         | -0.044833333 | -0.006       | -0.1299      | 0.041133333  |
| RUNDC2C       | -0.162033333 | 0.024433333  | -0.051       | -0.179833333 |
| SNORD91A      | 0.0754       | 0.0809       | 0.0065       | 0.194733333  |
| C12orf57      | -0.296966667 | -0.129433333 | 0.015966667  | -0.2414      |
| IFT88         | -0.1273      | -0.073366667 | -0.1631      | -0.153066667 |
| SNORD31       | 0.036333333  | -0.137733333 | 0.085366667  | -0.015466667 |
| LGTN          | -0.345966667 | -0.112266667 | -0.013066667 | -0.0731      |
| IFIT1         | -0.2944      | -0.027433333 | 0.0452       | -0.100033333 |
| C16orf62      | -0.214433333 | -0.067233333 | -0.064866667 | -0.056733333 |
| NSMCE1        | -0.1458      | -0.175133333 | 0.005433333  | -0.0326      |
| TJAP1         | 0.0024       | -0.019233333 | -0.1247      | 0.087266667  |
| C11orf61      | 0.126233333  | 0.142966667  | -0.028833333 | 0.199733333  |
| LOC727726     | -0.122133333 | 0.009166667  | 0.045333333  | 0.0371       |
| LOC100129201  | -0.125066667 | 0.017833333  | 0.002033333  | 0.023966667  |
| LOC389641     | -0.0861      | -0.063266667 | 0.0158       | 0.085766667  |
| EIF2S2        | -0.320566667 | -0.1595      | -0.172666667 | -0.1702      |
| MRPL9         | 0.087966667  | 0.085933333  | -0.1349      | 0.138966667  |
| LOC100129781  | 0.1129       | -0.156966667 | -0.234466667 | 0.015033333  |
| CCNJ          | -0.0307      | 0.0714       | 0.0611       | 0.0839       |
| ITGB1BP1      | -0.164866667 | -0.093433333 | -0.179733333 | 0.102366667  |
| PCNXL3        | 0.040533333  | -0.1513      | -0.182766667 | 0.013133333  |
| LOC654161     | -0.039866667 | -0.295533333 | -0.0297      | 0.031166667  |
| SNHG4         | 0.0093       | -0.044533333 | 0.129        | 0.026533333  |
| AGA           | -0.139466667 | -0.252666667 | -0.1603      | -0.079033333 |
| LOC646144     | 0.0272       | 0.083066667  | -0.142166667 | 0.106833333  |
| EPN2          | -0.0758      | 0.0278       | -0.013766667 | 0.002633333  |



|              |              |              |              |              |
|--------------|--------------|--------------|--------------|--------------|
| SNAPIN       | -0.086233333 | -0.117433333 | 0.053266667  | 0.041433333  |
| KIAA0513     | -0.142233333 | -0.055033333 | -0.2081      | 0.029033333  |
| LOC100132352 | -0.2072      | -0.077966667 | -0.1162      | -0.056833333 |
| CDC42EP2     | 0.109        | 0.004466667  | 0.0102       | 0.238133333  |
| C9orf80      | -0.1622      | -0.0705      | 0.230533333  | -0.094833333 |
| LOC728780    | -0.114933333 | -0.034166667 | -0.0322      | -0.012033333 |
| TM2D2        | -0.105366667 | -0.0018      | -0.135533333 | -0.0886      |
| DDX41        | 0.104033333  | -0.137033333 | -0.172133333 | 0.0579       |
| LOC100132291 | -0.189933333 | -0.231433333 | -0.0811      | -0.132133333 |
| LOC100132888 | 0.163566667  | -0.0131      | -0.0613      | -0.029866667 |
| RBM7         | -0.0535      | -0.210466667 | -0.080933333 | -0.0791      |
| LOC341784    | 0.1106       | 0.1155       | -0.028133333 | 0.154866667  |
| G6PC3        | -0.088433333 | -0.151366667 | -0.180133333 | -0.084366667 |
| TMEM50A      | -0.1199      | -0.053533333 | 0.005066667  | -0.0047      |
| CALHM2       | 0.085933333  | -0.110966667 | 0.022566667  | 0.0535       |
| CTDP1        | 0.0409       | -0.146       | -0.151733333 | -0.050233333 |
| GCLC         | -0.0912      | -0.146266667 | -0.090266667 | 0.0574       |
| SNPH         | -0.0715      | -0.0815      | -0.104166667 | -0.040533333 |
| GPR89B       | -0.105866667 | -0.296533333 | 0.011233333  | -0.118033333 |
| ADAM19       | 1.348633333  | 0.9341       | -0.386866667 | 0.872633333  |
| MTX1         | -0.066466667 | -0.006633333 | -0.073233333 | -0.016633333 |
| BRD4         | -0.075266667 | -0.040933333 | 0.105033333  | 0.096733333  |
| PITX2        | -0.071033333 | -0.262766667 | -0.3513      | -0.279833333 |
| LOC645436    | 0.0853       | -0.142033333 | 0.037333333  | 0.060966667  |
| HIST1H4J     | -0.053433333 | 0.095833333  | -0.010333333 | 0.112233333  |
| PRC1         | 0.266066667  | 0.092333333  | -0.0293      | 0.161733333  |
| EAF2         | -0.1191      | 0.021166667  | -0.158133333 | 0.017466667  |
| RP9P         | 0.181166667  | -0.177633333 | -0.0806      | 0.1385       |
| MPDU1        | 0.0783       | -0.090066667 | -0.013766667 | 0.039233333  |
| LOC339782    | 0.1075       | -0.035633333 | -0.085433333 | 0.105366667  |
| RRP15        | 0.2835       | 0.299966667  | 0.0672       | 0.4263       |
| MCART1       | -0.218966667 | -0.021933333 | 0.111833333  | -0.153633333 |
| ZFX4         | -0.066166667 | -0.106033333 | 0.004266667  | 0.0366       |
| CFDP1        | -0.2015      | -0.1218      | 0.033        | -0.027833333 |
| LOC100133772 | -0.183866667 | -0.123033333 | 0.0802       | 0.008233333  |
| CCAR1        | 0.140933333  | 0.008966667  | -0.1395      | 0.102233333  |
| LOC729423    | 0.230466667  | -0.269033333 | 0.1846       | 0.138633333  |
| EIF4B        | -0.2494      | -0.181866667 | 0.114266667  | -0.063666667 |
| SAPS3        | 0.1146       | 0.0389       | -0.016166667 | 0.156633333  |
| LOC646476    | 0.147266667  | -0.043333333 | -0.018       | 0.245033333  |
| N6AMT2       | -0.198066667 | 0.109166667  | -0.0488      | 0.022666667  |
| NIT1         | -0.1275      | 0.034633333  | -0.183433333 | 0.0501       |
| TRO          | 0.048166667  | -0.068066667 | -0.055766667 | 0.074933333  |
| FAM108B1     | -0.2148      | -0.1557      | 0.070366667  | -0.136566667 |
| SMARCE1      | 0.0068       | -0.2239      | -0.1111      | 0.105466667  |
| LOC391811    | -0.054233333 | 0.050733333  | -0.0756      | 0.0777       |
| MICB         | 0.118233333  | -0.0021      | -0.0411      | 0.1464       |

|              |              |              |              |              |
|--------------|--------------|--------------|--------------|--------------|
| FAM193A      | 0.017166667  | -0.082633333 | -0.120633333 | -0.0335      |
| KCNK1        | -0.0346      | -0.0256      | 0.004033333  | 0.0235       |
| MRPL18       | 0.111233333  | 0.0384       | -0.0833      | 0.0586       |
| C7orf68      | 0.1281       | 0.0911       | -0.1418      | -0.234133333 |
| LOC730534    | 0.018666667  | 0.0141       | -0.1524      | 0.039966667  |
| LOC148915    | 0.1152       | -0.020766667 | -0.1957      | 0.1397       |
| KIF21A       | -0.051766667 | -0.170233333 | -0.081133333 | 0.044866667  |
| LOC729362    | -0.0985      | -0.111166667 | -0.108766667 | -0.102333333 |
| NOL11        | 0.0865       | 0.127866667  | 0.0995       | 0.189866667  |
| SSFA2        | 0.0898       | 0.063433333  | 0.111        | 0.3267       |
| GOLGA8B      | -0.019766667 | -0.225866667 | -0.128366667 | -0.0995      |
| FLJ10213     | 0.0448       | -0.151966667 | 0.070733333  | -0.007033333 |
| ISG20L1      | 0.340933333  | 0.613133333  | 0.3635       | 0.664166667  |
| LOC285176    | 0.0207       | 0.134633333  | -0.0225      | 0.057733333  |
| ATF5         | 0.2493       | -0.028633333 | -0.024166667 | 0.449133333  |
| NRSN2        | -0.1488      | -0.068666667 | -0.1182      | -0.093166667 |
| PAF1         | 0.011333333  | 0.097        | -0.085633333 | 0.088133333  |
| U2AF1L4      | -0.080866667 | -0.153766667 | -0.235366667 | -0.116133333 |
| SMG7         | 0.064133333  | -0.103433333 | -0.116733333 | 0.015733333  |
| SF3B14       | -0.1004      | -0.0178      | -0.0228      | 0.018233333  |
| GPX3         | -0.037366667 | -0.053733333 | 0.041733333  | 0.1302       |
| CHRN1        | -0.24        | -0.313433333 | -0.442466667 | -0.248533333 |
| FECH         | -0.167566667 | -0.145533333 | -0.262433333 | -0.114233333 |
| C9orf169     | -0.249333333 | -0.145033333 | -0.111633333 | -0.094       |
| POLG         | 0.038266667  | 0.0656       | -0.1018      | 0.084333333  |
| LOC728689    | -0.173833333 | -0.041233333 | -0.174       | -0.0254      |
| TOX4         | -0.199966667 | -0.087933333 | -0.1709      | -0.098066667 |
| SMC4         | 0.215        | 0.0867       | 0.0505       | 0.1482       |
| ETAA1        | -0.0965      | -0.0423      | -0.031133333 | -0.069533333 |
| LOC648434    | 0.0095       | 0.004533333  | -0.065166667 | 0.115733333  |
| UQCRQ        | -0.2318      | -0.0144      | -0.0283      | -0.025633333 |
| LOC728153    | 0.062633333  | 0.064333333  | 0.155733333  | 0.220766667  |
| ATP6AP2      | -0.228366667 | -0.272066667 | -0.093833333 | 0.025366667  |
| TRIM58       | 0.173833333  | -0.017066667 | -0.180533333 | 0.047233333  |
| FGF18        | 0.0711       | -0.102966667 | -0.154966667 | -0.154566667 |
| LOC644634    | 0.074466667  | -0.241466667 | 0.036833333  | 0.1317       |
| GPS2         | -0.044566667 | -0.012133333 | -0.170366667 | 0.097533333  |
| TNS3         | -0.006833333 | -0.2489      | -0.450233333 | -0.151366667 |
| PSMD3        | 0.121766667  | -0.032466667 | -0.105966667 | 0.0688       |
| TMEM11       | 0.153866667  | 0.095666667  | 0.040533333  | 0.1174       |
| RNPC2        | -0.052533333 | -0.1013      | -0.0442      | -0.007133333 |
| PDE8A        | -0.0761      | 0.029166667  | -0.039266667 | -0.0884      |
| ABL1         | -0.075266667 | -0.1136      | -0.247266667 | -0.1659      |
| PPP3CB       | -0.009533333 | -0.008833333 | -0.0789      | 0.078233333  |
| LOC100130764 | -0.202666667 | -0.092433333 | 0.2411       | 0.0604       |
| LOC100133516 | -0.166733333 | 0.1302       | 0.139433333  | -0.1608      |
| C16orf42     | -0.021333333 | -0.016466667 | -0.070733333 | 0.151366667  |

|              |              |              |              |              |
|--------------|--------------|--------------|--------------|--------------|
| GLI4         | -0.192933333 | -0.1951      | 0.021933333  | 0.001233333  |
| C12orf51     | -0.049633333 | -0.0626      | -0.123933333 | -0.111833333 |
| LOC650132    | -0.024866667 | -0.112766667 | 0.085466667  | 0.004766667  |
| SNORD6       | 0.0011       | -0.0742      | 0.018533333  | 0.080133333  |
| NAP1L5       | -0.1994      | -0.251066667 | 0.007666667  | -0.177666667 |
| PRICKLE4     | 0.0007       | -0.0216      | -0.164766667 | 0.012633333  |
| EDC3         | 0.0807       | -0.034866667 | -0.102666667 | 0.158566667  |
| ACTN4        | 0.158933333  | 0.1367       | -0.037166667 | 0.230866667  |
| LOC646348    | -0.0327      | -0.062666667 | -0.038633333 | 0.161066667  |
| WARS2        | -0.119433333 | -0.134666667 | -0.0153      | 0.034266667  |
| PITPNA       | 0.0209       | -0.1342      | -0.032266667 | 0.171366667  |
| PPP1R15B     | -0.137766667 | -0.031066667 | -0.091766667 | 0.030366667  |
| LOC642280    | -0.005833333 | -0.0877      | 0.101866667  | -0.111633333 |
| DET1         | -0.2188      | -0.0839      | -0.158       | -0.008933333 |
| POLD3        | 0.131933333  | -0.010633333 | -0.0341      | 0.0458       |
| LOC100190938 | -0.194966667 | 0.0811       | 0.137066667  | -0.015533333 |
| VPS18        | -0.149766667 | -0.121533333 | -0.0037      | -0.060466667 |
| LOC728698    | 0.277933333  | -0.096966667 | 0.0459       | 0.0889       |
| RPL12P6      | -0.1433      | -0.119133333 | -0.005       | 0.046466667  |
| SCARNA16     | -0.030766667 | -0.078566667 | 0.161066667  | 0.031266667  |
| ERAP1        | 0.1174       | -0.117       | -0.054633333 | 0.043266667  |
| DNAJC10      | -0.047266667 | -0.000566667 | -0.140866667 | -0.070933333 |
| B4GALT5      | -0.0436      | -0.053466667 | 0.037833333  | 0.128933333  |
| TERF1        | -0.391866667 | -0.052933333 | -0.0833      | -0.296266667 |
| NCBP1        | 0.1504       | 0.060866667  | -0.043566667 | 0.179233333  |
| ZNF513       | 0.0002       | -0.1706      | -0.083066667 | 0.084933333  |
| WHSC1        | -0.052333333 | 0.023033333  | 0.039466667  | -0.068866667 |
| LOC100132761 | -0.039466667 | -0.068166667 | 0.127333333  | -0.0661      |
| PKIG         | 0.207866667  | -0.0036      | -0.281166667 | 0.160133333  |
| ASXL1        | -0.100533333 | -0.241566667 | -0.1166      | -0.0544      |
| FLJ35776     | 0.026466667  | 0.017566667  | -0.2335      | -0.000366667 |
| CALR         | -0.132566667 | -0.0791      | -0.017033333 | -0.078333333 |
| HNRNPA1L2    | 0.0571       | -0.036833333 | -0.1785      | -0.1126      |
| LOC643960    | -0.176766667 | 0.0589       | -0.2669      | -0.1203      |
| TRUB2        | -0.167566667 | 0.0116       | -0.064333333 | -0.042633333 |
| FAM72B       | 0.235933333  | 0.149833333  | 0.0089       | 0.202466667  |
| LOC729317    | 0.026366667  | -0.0181      | -0.104266667 | 0.008133333  |
| NFS1         | -0.0536      | -0.026066667 | 0.023166667  | 0.057533333  |
| CNPY4        | -0.3402      | -0.161766667 | 0.029366667  | -0.076533333 |
| LOC651380    | -0.2149      | -0.078333333 | -0.077966667 | -0.0348      |
| KATNB1       | -0.0926      | -0.078933333 | 0.0949       | 0.016133333  |
| IVD          | -0.0045      | -0.012933333 | 0.1154       | 0.1001       |
| PPP4R2       | 0.1674       | 0.122366667  | -0.095166667 | 0.038233333  |
| EXOSC9       | 0.522633333  | 0.009333333  | -0.047433333 | 0.383033333  |
| PSMD11       | 0.110833333  | 0.0591       | -0.0589      | 0.108033333  |
| LOC441034    | -0.097966667 | -0.041933333 | 0.0185       | 0.003666667  |
| C3orf39      | -0.144733333 | -0.016266667 | -0.0275      | 0.0032       |

|              |              |              |              |              |
|--------------|--------------|--------------|--------------|--------------|
| RABGAP1L     | -0.1045      | -0.1659      | -0.1725      | -0.084866667 |
| C1orf203     | -0.297166667 | -0.199633333 | -0.1202      | -0.1791      |
| METAP2       | -0.0605      | -0.049       | -0.109466667 | 0.002933333  |
| C9orf64      | -0.058433333 | 0.089633333  | -0.1499      | -0.002133333 |
| SLC1A1       | -0.0093      | -0.071133333 | -0.105966667 | 0.051733333  |
| LOC100131647 | -0.055933333 | -0.0313      | -0.006566667 | 0.1592       |
| FLJ20718     | 0.170333333  | 0.166733333  | 0.0564       | 0.248733333  |
| ARSJ         | 0.2634       | 0.095133333  | 0.011866667  | 0.0983       |
| COX4I1       | -0.2083      | -0.052066667 | -0.0776      | 0.017233333  |
| BTAF1        | -0.008966667 | -0.0457      | -0.012366667 | 0.053733333  |
| FLJ32255     | -0.015133333 | -0.082366667 | -0.0302      | 0.011966667  |
| FXR2         | 0.1489       | 0.057566667  | -0.061066667 | 0.2685       |
| SNRPD3       | 0.0473       | 0.150833333  | -0.009133333 | 0.202433333  |
| MPV17L       | 0.041033333  | -0.0141      | -0.147033333 | -0.031133333 |
| SAR1B        | 0.157933333  | 0.049633333  | -0.1115      | 0.1179       |
| SP110        | -0.361166667 | -0.211466667 | 0.024533333  | -0.1296      |
| LOC728207    | -0.236233333 | 0.020366667  | -0.2861      | -0.041133333 |
| MRPL54       | 0.0436       | -0.077533333 | -0.2486      | 0.1064       |
| ZNF772       | -0.012233333 | 0.165366667  | -0.121933333 | -0.057566667 |
| GTPBP10      | -0.006266667 | -0.079566667 | 0.190133333  | 0.076166667  |
| LOC283874    | -0.1859      | -0.026066667 | -0.0995      | -0.1163      |
| LOC653717    | -0.167066667 | 0.023166667  | -0.117533333 | -0.0431      |
| ZNF673       | 0.004833333  | -0.2151      | -0.297033333 | -0.131166667 |
| ARF5         | -0.025233333 | -0.230466667 | -0.1588      | 0.0495       |
| BACE1        | -0.1022      | -0.0363      | -0.093233333 | 0.0029       |
| WAC          | 0.0123       | -0.0183      | -0.0192      | 0.201566667  |
| GSTO1        | 0.102866667  | -0.001233333 | 0.367366667  | 0.393833333  |
| NLE1         | 0.021833333  | 0.001566667  | -0.021833333 | 0.0208       |
| MON1B        | -0.036533333 | 0.0248       | -0.038566667 | 0.0854       |
| IKKBK        | -0.1351      | -0.091966667 | -0.172733333 | -0.14        |
| ZMYND19      | 0.0698       | 0.0684       | 0.102433333  | 0.169        |
| LOC100134424 | 0.066433333  | -0.113533333 | -0.0818      | 0.0153       |
| ATP5I        | -0.148466667 | -0.1504      | -0.032633333 | -0.141466667 |
| SYCP2        | -0.118866667 | -0.090666667 | -0.032966667 | -0.058766667 |
| INPP5E       | 0.128233333  | -0.019433333 | -0.081366667 | 0.1497       |
| SETD5        | -0.066066667 | -0.144966667 | 0.1052       | 0.1748       |
| LOC346085    | -0.011033333 | -0.002366667 | -0.073833333 | -0.011233333 |
| ADC          | -0.1177      | -0.173233333 | -0.274433333 | -0.052033333 |
| TPP1         | -0.383933333 | -0.303433333 | 0.069066667  | -0.078066667 |
| MRPL45       | -0.170166667 | -0.179466667 | -0.131033333 | -0.027566667 |
| LOC730324    | -0.237433333 | 0.036266667  | -0.1421      | 0.007233333  |
| CCDC107      | 0.397        | 0.014533333  | 0.030566667  | 0.271733333  |
| MRPL42P5     | -0.1423      | -0.068733333 | -0.0837      | 0.004066667  |
| SNORA64      | 0.115166667  | -0.026333333 | 0.0272       | -0.008166667 |
| LOC199800    | 0.027833333  | 0.0039       | -0.052       | 0.061        |
| PARVA        | 0.048833333  | -0.056366667 | -0.0743      | 0.0837       |
| NOTCH3       | -0.061333333 | -0.026433333 | -0.061866667 | -0.038933333 |

|              |              |              |              |              |
|--------------|--------------|--------------|--------------|--------------|
| LOC730417    | -0.109633333 | -0.0456      | -0.1461      | -0.016533333 |
| LOC442270    | -0.4251      | -0.0146      | -0.3719      | -0.403333333 |
| MRPS16       | -0.0345      | -0.095       | 0.163666667  | 0.155633333  |
| SLC35C2      | -0.065       | -0.323233333 | -0.044633333 | 0.012933333  |
| DYNC1H1      | -0.104933333 | -0.055633333 | 0.120666667  | -0.101966667 |
| HNRNPH1      | 0.175266667  | -0.134933333 | -0.03        | 0.079166667  |
| LOC100129441 | 0.035733333  | -0.094733333 | -0.130866667 | 0.0082       |
| KIAA0406     | -0.0078      | 0.183866667  | 0.030666667  | 0.124633333  |
| QARS         | -0.1071      | -0.144033333 | -0.168333333 | -0.1164      |
| LOC643452    | -0.0445      | -0.044233333 | 0.068733333  | 0.064433333  |
| SELT         | -0.0559      | 0.081266667  | 0.011033333  | 0.135        |
| LOC647099    | -0.056333333 | -0.029633333 | -0.015833333 | -0.008633333 |
| WDR59        | -0.106033333 | -0.082466667 | 0.001533333  | 0.036133333  |
| UBXN7        | -0.097133333 | 0.118633333  | 0.061933333  | 0.167366667  |
| NFXL1        | 0.197266667  | -0.0488      | -0.0562      | 0.154433333  |
| NRD1         | -0.008366667 | -0.127433333 | -0.179533333 | -0.015966667 |
| BBS2         | -0.481233333 | -0.098666667 | 0.072566667  | -0.1909      |
| PAN3         | 0.013933333  | -0.107766667 | -0.045966667 | 0.139666667  |
| ORC4L        | -0.117066667 | 0.000866667  | 0.057466667  | 0.048766667  |
| SURF2        | -0.092933333 | 0.029166667  | -0.0088      | -0.063       |
| TNFSF14      | -0.1116      | 0.0653       | 0.0459       | -0.0986      |
| LOC100131160 | -0.484166667 | 0.0808       | -0.431733333 | -0.4089      |
| HNRPH1       | 0.103166667  | -0.141266667 | -0.002233333 | 0.0166       |
| USP12        | 0.084        | 0.155166667  | -0.042066667 | 0.1074       |
| SNORA16A     | -0.015233333 | 0.088333333  | 0.095766667  | 0.1002       |
| CHCHD2       | -0.001866667 | 0.067266667  | -0.064666667 | -0.013666667 |
| PSMA5        | 0.084566667  | -0.018666667 | -0.1198      | 0.152966667  |
| FLJ44054     | 0.028366667  | -0.195533333 | -0.012166667 | 0.014066667  |
| ZNF655       | 0.1594       | -0.0001      | 0.127666667  | 0.263366667  |
| MGC11082     | 0.070066667  | 0.035766667  | -0.1746      | 0.073866667  |
| NUP188       | 0.199333333  | -0.015966667 | -0.079133333 | 0.148866667  |
| LAIR1        | -0.0853      | -0.050433333 | -0.059333333 | -0.024366667 |
| 9-Sep        | 0.1525       | 0.007133333  | -0.034833333 | 0.103766667  |
| ACAA2        | -0.127866667 | -0.221833333 | -0.038366667 | 0.006933333  |
| LOC100132593 | -0.0277      | 0.052        | -0.098266667 | 0.0103       |
| USP9X        | -0.081533333 | -0.0624      | -0.070666667 | 0.003566667  |
| NOP16        | 0.302966667  | 0.280633333  | 0.2221       | 0.346166667  |
| ITFG2        | 0.012233333  | -0.137333333 | -0.160233333 | 0.055866667  |
| OVCA2        | -0.0826      | -0.045766667 | 0.098633333  | 0.1707       |
| RNH1         | -0.296533333 | -0.018933333 | -0.226433333 | -0.0645      |
| LOC100130935 | -0.097066667 | -0.0876      | 0.009133333  | 0.004866667  |
| SUPT6H       | -0.090533333 | -0.016466667 | -0.004033333 | 0.115633333  |
| C17orf101    | -0.137333333 | -0.1781      | -0.106866667 | -0.045033333 |
| NCOR1        | -0.0819      | -0.115466667 | -0.185666667 | -0.041533333 |
| LOC642460    | -0.4087      | -0.1251      | -0.115666667 | -0.2202      |
| SNORD76      | -0.030633333 | 0.081333333  | 0.041166667  | 0.121333333  |
| DAXX         | 0.089566667  | 0.0308       | 0.064366667  | 0.1325       |

|              |              |              |              |              |
|--------------|--------------|--------------|--------------|--------------|
| ORC2L        | -0.094633333 | 0.129        | 0.165333333  | 0.043166667  |
| SOX11        | -0.0414      | -0.017533333 | -0.083833333 | -0.001233333 |
| SND1         | -0.2139      | -0.076466667 | -0.2705      | -0.1977      |
| LOC650157    | 0.233833333  | -0.193533333 | 0.086366667  | 0.286533333  |
| ZBTB9        | 0.060766667  | -0.128366667 | -0.069933333 | 0.116966667  |
| NET1         | 0.1706       | 0.1219       | 0.1029       | 0.1917       |
| TMED7        | 0.053766667  | -0.086933333 | -0.206033333 | -0.057033333 |
| C12orf30     | 0.039766667  | 0.010366667  | 0.0265       | -0.021966667 |
| REPS2        | -0.108133333 | -0.119       | -0.174866667 | 0.026566667  |
| LOC643342    | -0.057233333 | 0.0649       | -0.131733333 | 0.065333333  |
| PIGQ         | -0.256133333 | -0.122033333 | -0.0804      | -0.109433333 |
| CRELD1       | -0.257966667 | -0.1723      | 0.045566667  | -0.155666667 |
| CDC25C       | 0.148133333  | -0.0295      | -0.029233333 | 0.1989       |
| APOBEC3G     | -0.027533333 | -0.156266667 | -0.124466667 | -0.070133333 |
| GCN1L1       | -0.092933333 | 0.003833333  | 0.045633333  | -0.020633333 |
| ST5          | -0.1408      | -0.1397      | 0.0938       | 0.141666667  |
| CDCA7L       | -0.235       | 0.0203       | 0.049433333  | -0.127733333 |
| UPLP         | -0.303333333 | -0.258766667 | -0.118966667 | -0.171566667 |
| MARK3        | 0.111666667  | -0.0862      | 0.037666667  | 0.041933333  |
| SEMA3B       | -0.0968      | -0.049633333 | 0.0187       | 0.016033333  |
| USPL1        | 0.2065       | 0.000533333  | 0.0097       | 0.2705       |
| LOC100128115 | 0.08         | -0.034566667 | -0.0562      | 0.075133333  |
| UNG          | -0.1547      | 0.279666667  | 0.0052       | 0.0776       |
| NDRG3        | -0.217433333 | -0.117333333 | -0.077466667 | -0.095366667 |
| ZNF2         | -0.067033333 | -0.0994      | -0.0991      | -0.0042      |
| TRABD        | 0.0786       | -0.0658      | -0.2161      | -0.0103      |
| SHARPIN      | -0.072433333 | -0.1377      | -0.044033333 | 0.0697       |
| BAD          | -0.110033333 | -0.183233333 | -0.025266667 | -0.127866667 |
| OAS3         | 0.108566667  | 0.036766667  | -0.060866667 | 0.159233333  |
| ALPP         | -0.119566667 | 0.027333333  | 0.187033333  | 0.0135       |
| LOC728901    | -0.035133333 | -0.074766667 | -0.074433333 | 0.1414       |
| CCDC109B     | 0.0828       | 0.2384       | -0.157866667 | 0.193433333  |
| LOC100129064 | 0.149933333  | 0.033533333  | 0.083433333  | 0.144566667  |
| LOC100130511 | 0.1783       | 0.0294       | -0.036866667 | 0.1667       |
| LOC100130053 | -0.363466667 | 0.038933333  | 0.0267       | -0.221733333 |
| LOC653226    | 0.071533333  | -0.043566667 | 0.0718       | 0.111666667  |
| ISG20L2      | 0.010833333  | 0.0737       | -0.167266667 | 0.0704       |
| L3MBTL3      | -0.0837      | 0.037933333  | 0.0252       | 0.0538       |
| LOC649330    | 0.040566667  | -0.015166667 | -0.040766667 | 0.154666667  |
| AEN          | 0.290266667  | 0.204633333  | 0.329666667  | 0.348566667  |
| LOC653658    | -0.0097      | -0.055666667 | -0.069666667 | 0.0297       |
| TOP3A        | 0.014633333  | 0.071733333  | -0.026466667 | 0.044666667  |
| LOC100128062 | -0.300266667 | -0.016333333 | -0.002833333 | -0.207833333 |
| VPS37D       | -0.068166667 | -0.228266667 | -0.1033      | -0.204533333 |
| CYCSL1       | 0.1599       | 0.077566667  | 0.048166667  | 0.218966667  |
| TUBG1        | 0.247266667  | 0.128933333  | -0.105433333 | 0.1144       |
| NAT5         | 0.194066667  | 0.044033333  | 0.017666667  | 0.149133333  |

|              |              |              |              |              |
|--------------|--------------|--------------|--------------|--------------|
| AKIRIN1      | 0.357133333  | -0.003       | 0.001266667  | 0.2022       |
| ZNF20        | 0.223366667  | -0.043333333 | -0.181433333 | 0.154533333  |
| NUP155       | -0.0464      | 0.2215       | -0.1038      | 0.1171       |
| JOSD2        | -0.127766667 | -0.0554      | -0.159466667 | -0.0095      |
| XRCC2        | -0.1671      | 0.205633333  | 0.1097       | -0.050033333 |
| RNF25        | 0.102766667  | 0.021933333  | 0.0196       | 0.229933333  |
| ILF2         | 0.084966667  | 0.084266667  | -0.008666667 | 0.171466667  |
| RPS26        | 0.217233333  | 0.111533333  | 0.023766667  | 0.135433333  |
| SPIN3        | -0.1662      | -0.2217      | -0.055066667 | -0.1248      |
| LOC654069    | -0.227433333 | -0.0006      | -0.158633333 | -0.196033333 |
| DENND2A      | -0.0674      | -0.0153      | -0.0232      | 0.0052       |
| PTPRM        | -0.047966667 | -0.187066667 | -0.056133333 | -0.004866667 |
| TTC12        | -0.008333333 | -0.0499      | -0.2298      | -0.0669      |
| LOC642361    | -0.180033333 | -0.179666667 | -0.067466667 | -0.019766667 |
| NOTUM        | -0.0299      | -0.064333333 | 0.0051       | 0.0708       |
| ABHD4        | -0.333933333 | -0.425       | -0.2497      | -0.124166667 |
| LOC642250    | -0.389733333 | -0.052533333 | -0.4964      | -0.406433333 |
| LOC647150    | 0.053533333  | 0.159266667  | -0.0548      | 0.100666667  |
| RABEPK       | 0.0174       | 0.152366667  | -0.102533333 | 0.153133333  |
| C10orf6      | -0.1446      | -0.009766667 | 0.023833333  | 0.002633333  |
| SGMS2        | 0.167433333  | 0.0636       | -0.145       | 0.157966667  |
| PSMB6        | -0.074733333 | -0.043766667 | -0.038833333 | 0.034633333  |
| C7orf49      | 0.029266667  | 0.046566667  | -0.146833333 | -0.010633333 |
| FLJ33630     | -0.101366667 | -0.0924      | -0.105166667 | -0.081666667 |
| LOC727758    | 0.0151       | -0.019433333 | 0.023533333  | 0.050266667  |
| LOC728919    | -0.131166667 | 0.062966667  | -0.1502      | -0.087433333 |
| ABCA9        | -0.019333333 | 0.050466667  | -0.0473      | 0.038933333  |
| LOC100130598 | -0.27        | 0.1131       | -0.154233333 | -0.195133333 |
| C6orf89      | -0.0385      | 0.003866667  | -0.129666667 | -0.051233333 |
| HERC2P4      | -0.014766667 | -0.099133333 | -0.008733333 | -0.184933333 |
| TTL3         | -0.089066667 | -0.1894      | -0.016966667 | -0.002533333 |
| ZNF16        | -0.207       | -0.146466667 | -0.279733333 | -0.168033333 |
| LOC723805    | 0.139433333  | -0.036166667 | 0.0012       | 0.093966667  |
| RPS13        | -0.018166667 | -0.043466667 | 0.006233333  | 0.121333333  |
| C11orf68     | 0.069066667  | 0.152533333  | -0.098966667 | 0.1428       |
| ZNF181       | -0.2577      | -0.3406      | -0.3404      | -0.286133333 |
| LOC729446    | -0.212466667 | -0.1422      | 0.101733333  | -0.075133333 |
| PYCR2        | 0.131566667  | -0.046466667 | 0.040766667  | 0.056166667  |
| HMG2         | 0.1773       | -0.011766667 | -0.1592      | 0.067133333  |
| CSTF2T       | -0.0964      | -0.127533333 | 0.023566667  | -0.021666667 |
| C10orf57     | -0.2699      | -0.1379      | -0.014533333 | -0.140633333 |
| GPN3         | 0.0822       | 0.035633333  | 0.069933333  | 0.063833333  |
| RNASEN       | 0.0603       | 0.1589       | -0.069266667 | 0.106066667  |
| FZD1         | -0.1651      | 0.0847       | 0.1724       | 0.004966667  |
| LOC400750    | -0.201133333 | 0.173833333  | -0.2462      | -0.075533333 |
| RNY5         | -0.0112      | 0.111233333  | 0.023166667  | 0.054633333  |
| ARSK         | 0.0035       | 0.0953       | -0.273266667 | -0.073766667 |

|              |              |              |              |              |
|--------------|--------------|--------------|--------------|--------------|
| SYNCRIP      | 0.180066667  | 0.0957       | -0.0848      | 0.127        |
| LOC400013    | 0.276533333  | 0.096166667  | -0.0235      | 0.217533333  |
| DAAM1        | 0.4058       | 0.039166667  | 0.016666667  | 0.2066       |
| LRSAM1       | -0.1731      | -0.141833333 | -0.075833333 | -0.166733333 |
| TRIP11       | -0.285866667 | 0.098566667  | -0.2507      | -0.0921      |
| SPATS2L      | 0.348333333  | -0.0025      | -0.140866667 | 0.238333333  |
| HOXD3        | 0.002366667  | -0.035966667 | -0.121366667 | -0.010166667 |
| RPS17        | -0.0482      | -0.1181      | -0.049       | -0.073       |
| LOC729143    | -0.118       | 0.106166667  | -0.1014      | -0.0248      |
| NSL1         | -0.1168      | 0.036966667  | 0.042233333  | -0.021366667 |
| RHBDD1       | -0.161066667 | -0.053833333 | -0.1494      | -0.168433333 |
| KRT8         | -0.1038      | 0.016233333  | 0.0147       | -0.036233333 |
| PSMD10       | 0.084233333  | -0.102666667 | -0.092433333 | -0.0548      |
| RB1CC1       | -0.120233333 | -0.297933333 | -0.253033333 | -0.254766667 |
| ZNF770       | -0.057233333 | -0.002733333 | -0.152766667 | -0.0321      |
| SKIV2L       | -0.1857      | -0.043066667 | -0.011833333 | -0.094833333 |
| ZNF434       | -0.025833333 | -0.150566667 | -0.086466667 | 0.079766667  |
| HLCS         | -0.1959      | -0.052366667 | -0.0505      | -0.0767      |
| POM121       | -0.0212      | 0.061466667  | 0.034633333  | 0.061666667  |
| PHLPP2       | 0.3304       | 0.0285       | 0.135533333  | 0.258666667  |
| PVT1         | 0.1468       | -0.003       | 0.0402       | 0.1708       |
| LOC641814    | 0.0937       | -0.073933333 | 0.0015       | 0.024866667  |
| LOC653505    | 0.1361       | -0.091733333 | 0.093833333  | 0.133933333  |
| UBA3         | 0.060033333  | -0.053233333 | 0.002933333  | 0.100866667  |
| SUMO1P3      | -0.2145      | -0.005133333 | -0.0543      | -0.119266667 |
| LOC391670    | -0.0625      | -0.021533333 | 0.047833333  | -0.0599      |
| SMAD4        | -0.032966667 | -0.330033333 | -0.155533333 | 0.045766667  |
| ALS2         | -0.005233333 | -0.090766667 | -0.2069      | -0.032033333 |
| ASPHD2       | 0.093866667  | -0.026966667 | -0.027866667 | 0.211033333  |
| COMMD4       | -0.0514      | -0.011833333 | -0.030166667 | 0.0234       |
| LOC391334    | -0.1917      | 0.0818       | 0.0836       | 0.075866667  |
| CENTD2       | 0.0522       | -0.213333333 | 0.071066667  | 0.119766667  |
| TMSB10       | 0.060133333  | -0.0574      | -0.031766667 | 0.060866667  |
| PKIB         | -0.088233333 | -0.0467      | -0.022833333 | -0.0198      |
| CENTA1       | -0.052233333 | -0.0502      | 0.041666667  | -0.012733333 |
| LOC100132715 | 0.013966667  | 0.0597       | 0.056466667  | 0.134033333  |
| PRPF18       | 0.161933333  | 0.005533333  | -0.0995      | 0.1226       |
| KIAA1712     | -0.041833333 | -0.091466667 | -0.029466667 | 0.0163       |
| SLC27A5      | -0.062633333 | 0.004333333  | -0.0612      | -0.019433333 |
| RHBDL2       | -0.297933333 | 0.1181       | 0.1327       | -0.058166667 |
| ASB8         | -0.146333333 | -0.1844      | 0.004466667  | 0.056066667  |
| CCDC91       | -0.241533333 | -0.015       | -0.3188      | -0.227733333 |
| LOC728903    | -0.1026      | 0.2945       | 0.078133333  | 0.041033333  |
| TRAF2        | 0.2224       | 0.161666667  | -0.044833333 | 0.260666667  |
| TNK2         | 0.008866667  | -0.164566667 | -0.1681      | -0.030466667 |
| LOC400652    | -0.582833333 | -0.005766667 | -0.6359      | -0.5363      |
| ZNF414       | 0.0004       | 0.009166667  | -0.188333333 | -0.0356      |



|              |              |              |              |              |
|--------------|--------------|--------------|--------------|--------------|
| PICALM       | 0.180166667  | -0.012566667 | 0.092566667  | 0.246033333  |
| CLDN15       | -0.144933333 | -0.115066667 | -0.0529      | 0.094033333  |
| MAP3K12      | -0.192666667 | -0.1207      | -0.0703      | -0.079366667 |
| HSPA4        | -0.143633333 | 0.129        | 0.121666667  | 0.1097       |
| TMEM131      | 0.1401       | 0.002633333  | 0.0734       | 0.163566667  |
| LOC729439    | -0.0244      | -0.045333333 | -0.000333333 | -0.0262      |
| LOC392221    | -0.059866667 | 0.0378       | -0.1284      | -0.1309      |
| BCKDHA       | -0.2933      | -0.3206      | -0.104066667 | -0.160733333 |
| ZNF248       | -0.0276      | -0.182       | -0.032766667 | -0.100266667 |
| STOML1       | -0.2077      | -0.0245      | 0.0609       | -0.040566667 |
| LOC100128781 | 0.003933333  | 0.0265       | -0.064733333 | -0.027       |
| LOC100133273 | -0.032966667 | 0.020133333  | -0.0766      | 0.0935       |
| LRRC37B2     | -0.256266667 | 0.06         | 0.181866667  | -0.202933333 |
| C2orf34      | -0.072533333 | -0.2117      | -0.1346      | 0.007533333  |
| MDK          | -0.160766667 | -0.1677      | -0.015066667 | -0.042766667 |
| FLJ38723     | 0.042366667  | -0.097333333 | 0.064866667  | -0.0575      |
| DLGAP4       | 0.109566667  | 0.051433333  | -0.301866667 | -0.0378      |
| LOC648659    | -0.594666667 | 0.021366667  | -0.505833333 | -0.394666667 |
| USP11        | -0.114866667 | -0.105833333 | -0.056733333 | -0.0399      |
| ANKZF1       | -0.056566667 | -0.114766667 | -0.1874      | -0.062133333 |
| LOC100131096 | -0.3409      | 0.0026       | -0.164866667 | -0.178633333 |
| EIF3I        | 0.0398       | 0.084833333  | -0.0576      | 0.0605       |
| BMP2K        | 0.070966667  | -0.169366667 | -0.276966667 | -0.033666667 |
| LOC387825    | -0.410633333 | -0.240233333 | -0.009433333 | -0.1815      |
| LOC731789    | -0.1955      | 0.0717       | 0.0532       | -0.059       |
| LOC729231    | 0.503433333  | 0.450066667  | -0.003733333 | 0.4737       |
| LOC645688    | -0.1146      | -0.249133333 | -0.195566667 | -0.2173      |
| SPG11        | -0.271766667 | -0.201766667 | 0.028133333  | -0.141566667 |
| LOC100130446 | 0.0318       | -0.095966667 | -0.043533333 | -0.010866667 |
| AKNAD1       | -0.0067      | -0.0233      | -0.045766667 | 0.080966667  |
| TLK2         | 0.034233333  | 0.041266667  | 0.0405       | 0.152066667  |
| DNAJC27      | -0.128866667 | -0.153533333 | -0.04        | -0.029333333 |
| PGM2L1       | 0.127766667  | -0.1852      | -0.1098      | 0.032133333  |
| RGL2         | -0.1001      | -0.129866667 | 0.000333333  | -0.050666667 |
| PDP2         | 0.0374       | -0.021733333 | -0.003033333 | 0.071433333  |
| LOC730313    | -0.081433333 | 0.2977       | 0.162966667  | 0.081833333  |
| PIGV         | -0.248866667 | -0.129966667 | -0.074266667 | -0.210933333 |
| LOC728823    | -0.014033333 | -0.022633333 | -0.0326      | -0.0408      |
| CHKA         | -0.148466667 | -0.202466667 | -0.168066667 | 0.0577       |
| MORF4L2      | 0.132366667  | -0.063066667 | -0.144933333 | -0.021533333 |
| FERMT2       | 0.350166667  | -0.014566667 | -0.1254      | 0.168133333  |
| METRNL       | -0.2276      | 0.105566667  | 0.0367       | -0.030766667 |
| ASCC1        | -0.325566667 | -0.129       | -0.117666667 | -0.3009      |
| C12orf62     | -0.1568      | -0.1694      | -0.061633333 | -0.149866667 |
| CPSF4        | 0.0482       | -0.0945      | -0.0378      | 0.083866667  |
| LOC652071    | -0.067133333 | -0.0374      | 0.000966667  | 0.017366667  |
| RPL35        | 0.046266667  | -0.1754      | 0.089933333  | 0.099066667  |

|              |              |              |              |              |
|--------------|--------------|--------------|--------------|--------------|
| GALNT3       | -0.1209      | 0.0676       | 0.005033333  | 0.0332       |
| ERCC6        | 0.2277       | 0.083266667  | -0.155233333 | -0.006666667 |
| LOC729970    | -0.0555      | -0.074266667 | 0.0339       | 0.020566667  |
| TOMM7        | -0.184066667 | -0.033833333 | -0.158033333 | -0.083833333 |
| LOC400721    | -0.212333333 | -0.018733333 | 0.106866667  | -0.079933333 |
| EBF3         | 0.0186       | -0.107066667 | -0.030233333 | 0.0505       |
| LOC647322    | -0.0619      | 0.016166667  | -0.027166667 | 0.007233333  |
| TPP2         | -0.1063      | 0.061366667  | 0.0526       | -0.040833333 |
| STRA13       | 0.0395       | 0.207833333  | 0.021        | 0.1835       |
| C11orf51     | -0.003533333 | -0.018133333 | 0.012833333  | -0.020733333 |
| SLC16A12     | -0.1092      | 0.019633333  | 0.064066667  | -0.199766667 |
| NPHP1        | 0.019933333  | -0.0344      | -0.0525      | 0.0803       |
| CIP29        | 0.027966667  | -0.0546      | -0.106633333 | 0.0061       |
| TRK1         | -0.132333333 | 0.063966667  | 0.131466667  | 0.096        |
| TMEM189      | 0.0611       | -0.0007      | -0.1579      | 0.0376       |
| RHOD         | -0.0798      | -0.052233333 | -0.2545      | -0.094066667 |
| RPS27A       | 0.043933333  | -0.184666667 | -0.064333333 | -0.0285      |
| ALS2CR11     | 0.026        | 0.109033333  | -0.015966667 | 0.113533333  |
| NARG1L       | -0.088233333 | 0.041966667  | 0.0717       | 0.0129       |
| LOC388955    | 0.0445       | 0.1137       | -0.183866667 | 0.0084       |
| GSTT1        | -0.080433333 | 0.025866667  | -0.0232      | 0.019533333  |
| POTEF        | 0.196866667  | 0.0357       | -0.020533333 | 0.225333333  |
| HSPC111      | 0.459866667  | 0.3594       | 0.213333333  | 0.3705       |
| KCTD2        | 0.005933333  | -0.039566667 | -0.0931      | -0.001033333 |
| MAGEE1       | -0.013966667 | -0.095233333 | -0.067666667 | 0.0171       |
| MRPL47       | 0.0667       | 0.081        | -0.014733333 | 0.0317       |
| RNASE10      | -0.030033333 | -0.029066667 | 0.027833333  | 0.059766667  |
| FLJ25363     | -0.2854      | 0.125033333  | 0.034966667  | -0.2056      |
| SNORA65      | 0.084466667  | -0.0471      | 0.0995       | 0.161333333  |
| ZNF768       | 0.040266667  | -0.073066667 | 0.051866667  | 0.179933333  |
| EDEM1        | 0.164333333  | 0.0217       | -0.088366667 | 0.039233333  |
| LOC442232    | -0.143133333 | -0.013966667 | -0.084966667 | -0.0491      |
| LOC645979    | -0.101833333 | 0.2216       | -0.053533333 | 0.0366       |
| RABEP1       | -0.1567      | -0.08        | 0.067133333  | -0.121533333 |
| FTL          | -0.271633333 | -0.1247      | -0.006033333 | -0.1542      |
| LOC401717    | -0.695233333 | 0.0273       | -0.859066667 | -0.812066667 |
| UBLCP1       | 0.086666667  | 0.069333333  | -0.056       | 0.068333333  |
| NAT15        | -0.004066667 | -0.020233333 | -0.0194      | 0.092833333  |
| HINT1        | 0.0667       | -0.0864      | -0.050466667 | 0.027966667  |
| LOC494141    | 0.1253       | 0.007466667  | -0.035466667 | 0.098566667  |
| SCAMP3       | -0.0566      | 0.017733333  | -0.092533333 | 0.0578       |
| PLEC1        | 0.198866667  | 0.289366667  | -0.1337      | 0.133466667  |
| LOC100134209 | 0.0349       | -0.031833333 | -0.115333333 | -0.005566667 |
| MFSD5        | -0.142733333 | -0.104933333 | -0.0403      | 0.0662       |
| NUPL1        | 0.203733333  | 0.0966       | 0.1834       | 0.145133333  |
| DNAJB9       | -0.1515      | 0.1314       | -0.097133333 | -0.052733333 |
| ANP32C       | 0.0291       | 0.000766667  | 0.0557       | 0.069833333  |

|              |              |              |              |              |
|--------------|--------------|--------------|--------------|--------------|
| GTSF1        | -0.0178      | -0.1192      | 0.0117       | -0.016       |
| LOC148137    | -0.129933333 | 0.084766667  | -0.164666667 | -0.025       |
| NUP214       | -0.1344      | -0.097033333 | -0.053166667 | 0.0199       |
| DHX35        | -0.038566667 | -0.040666667 | 0.0913       | 0.0995       |
| ATP6V0E1     | -0.224233333 | -0.075366667 | 0.059333333  | -0.028233333 |
| LOC728693    | 0.037433333  | -0.129733333 | -0.0744      | 0.004733333  |
| LOC100128056 | 0.0576       | -0.3075      | -0.002033333 | 0.2084       |
| CCR6         | -0.143933333 | 0.068266667  | 0.067766667  | 0.0235       |
| LOC100128060 | -0.3251      | -0.0613      | -0.121766667 | -0.208266667 |
| RNF187       | 0.012833333  | -0.119266667 | -0.127133333 | -0.016366667 |
| THADA        | -0.130066667 | 0.0726       | -0.117666667 | -0.044466667 |
| SYS1         | -0.030033333 | -0.078566667 | -0.202566667 | -0.0931      |
| COPS7B       | -0.009566667 | -0.0269      | -0.009866667 | 0.001366667  |
| SNORD95      | -0.0187      | 0.068766667  | -0.1798      | -0.0431      |
| LOC641768    | -0.136433333 | 0.0268       | 0.031933333  | -0.0398      |
| LOC730291    | -0.0613      | 0.076933333  | -0.057266667 | -0.085366667 |
| KLHL18       | 0.275133333  | 0.124733333  | -0.000866667 | 0.2876       |
| IER5L        | 0.0591       | -0.1196      | -0.008266667 | 0.008866667  |
| THOP1        | 0.062433333  | 0.2321       | -0.082633333 | 0.196333333  |
| AQR          | -0.143533333 | -0.069233333 | 0.002066667  | -0.028933333 |
| LCN2         | -0.071733333 | -0.030233333 | -0.053833333 | -0.064033333 |
| RIMKLB       | -0.142133333 | 0.063866667  | 0.015466667  | 0.0407       |
| FKBPL        | -0.015       | 0.0591       | -0.084733333 | 0.0536       |
| ZNF787       | 0.069733333  | 0.091666667  | 0.1405       | 0.2344       |
| LOC100129650 | -0.0574      | -0.007066667 | -0.034666667 | 0.0421       |
| PROK1        | 0.055633333  | 0.025933333  | 0.1422       | 0.124233333  |
| IRF3         | 0.003033333  | 0.0471       | -0.162533333 | 0.070366667  |
| LRRC57       | 0.1017       | -0.0391      | -0.055533333 | 0.092733333  |
| LOC285900    | 0.0107       | 0.0596       | -0.169833333 | 0.019433333  |
| ZNF76        | -0.159133333 | -0.0522      | -0.054766667 | -0.0219      |
| LOC644128    | -0.0442      | -0.129266667 | -0.056033333 | 0.065366667  |
| ECE1         | 0.1154       | -0.064466667 | -0.127433333 | 0.010033333  |
| CNNM2        | -0.032866667 | -0.0578      | -0.105       | 0.042933333  |
| FAM50A       | -0.097233333 | -0.0343      | -0.120666667 | 0.062966667  |
| MARCKS       | 0.016766667  | -0.361433333 | -0.464866667 | -0.1277      |
| GEMIN5       | 0.145833333  | 0.164966667  | 0.069766667  | 0.1946       |
| LOC641972    | 0.040566667  | -0.048633333 | -0.002466667 | 0.063866667  |
| IL5RA        | 0.158233333  | -0.123733333 | 0.126233333  | 0.127633333  |
| DAZAP1       | 0.225366667  | 0.001566667  | -0.072666667 | 0.098933333  |
| ZBTB48       | -0.1838      | -0.0449      | -0.124833333 | -0.002633333 |
| CREB3        | 0.076266667  | -0.081333333 | 0.021266667  | 0.1989       |
| TMEM14A      | 0.093366667  | 0.093133333  | 0.051566667  | 0.140066667  |
| OAZ1         | -0.1444      | 0.046666667  | -0.0422      | -0.0092      |
| RNF5         | -0.075333333 | -0.0346      | -0.000366667 | -0.011533333 |
| DUSP19       | -0.1101      | 0.164433333  | 0.309033333  | 0.154666667  |
| HNRNPH3      | -0.1709      | -0.106333333 | 0.050733333  | -0.152766667 |
| ROBO3        | -0.146366667 | -0.037433333 | -0.2215      | -0.0038      |

|              |              |              |              |              |
|--------------|--------------|--------------|--------------|--------------|
| LOC441377    | -0.052533333 | 0.186733333  | -0.081666667 | 0.018233333  |
| AIRE         | -0.207566667 | -0.0173      | 0.0694       | -0.0843      |
| E2F3         | 0.0979       | 0.065066667  | 0.168566667  | 0.156433333  |
| TRIM26       | 0.027166667  | -0.0392      | -0.013466667 | 0.068133333  |
| FAM72D       | 0.226666667  | 0.253866667  | -0.0113      | 0.1415       |
| LOC100129093 | 0.033066667  | 0.006        | -0.089233333 | 0.056033333  |
| TOB2         | 0.155966667  | -0.119033333 | -0.091066667 | 0.242433333  |
| POLR2B       | 0.155866667  | 0.048666667  | -0.018       | 0.168866667  |
| PSTK         | 0.0118       | -0.043166667 | -0.089233333 | 0.0745       |
| MNS1         | -0.006833333 | 0.073833333  | 0.068533333  | 0.0092       |
| LOC441013    | -0.057566667 | -0.032833333 | -0.059466667 | -0.1276      |
| PPP1R14B     | 0.211833333  | 0.074066667  | -0.207466667 | 0.1111       |
| CCNL2        | -0.0649      | -0.1102      | -0.060033333 | -0.230666667 |
| LOC643802    | 0.061033333  | -0.146466667 | 0.079166667  | 0.056933333  |
| ZBTB7B       | -0.142133333 | -0.0247      | -0.008966667 | -0.1098      |
| PDPK1        | -0.052533333 | -0.081233333 | -0.023133333 | -0.009566667 |
| LOC100133067 | -0.1268      | 0.0083       | -0.0614      | -0.011766667 |
| WDR90        | 0.1114       | -0.033       | -0.096       | 0.132633333  |
| ZNF462       | -0.101266667 | 0.051633333  | 0.0405       | -0.043566667 |
| PRR14        | -0.144033333 | -0.032766667 | -0.122233333 | 0.001533333  |
| LCN1L1       | 0.034066667  | -0.188366667 | 0.059933333  | 0.0956       |
| UBXN2B       | -0.174133333 | -0.043333333 | -0.1793      | -0.1347      |
| TACC1        | 0.064266667  | -0.0218      | 0.2235       | 0.1635       |
| SNORA76      | 0.086533333  | -0.1104      | 0.043666667  | 0.121133333  |
| MON1A        | -0.097566667 | 0.048566667  | -0.0531      | -0.0324      |
| PNRC2        | 0.230766667  | 0.1268       | 0.109366667  | 0.254366667  |
| LOC647195    | 0.038333333  | -0.000866667 | 0.113133333  | 0.007466667  |
| EMD          | 0.038333333  | -0.000466667 | -0.154466667 | 0.023066667  |
| LOC100127913 | -0.080266667 | -0.142166667 | -0.0236      | 0.1474       |
| CHP          | -0.1985      | -0.2629      | 0.095466667  | -0.029566667 |
| METTL10      | -0.0457      | -0.0421      | 0.025633333  | -0.029966667 |
| NDUFA8       | -0.058366667 | -0.026833333 | -0.0015      | 0.004333333  |
| LOC388969    | -0.182866667 | -0.0721      | -0.2494      | -0.159633333 |
| LOC652657    | -0.087833333 | 0.000733333  | 0.150566667  | 0.121066667  |
| C1orf56      | -0.107966667 | -0.032366667 | 0.070266667  | 0.043        |
| LOC389435    | -0.050066667 | 0.026133333  | 0.038633333  | 0.003166667  |
| C2orf15      | -0.201866667 | -0.1362      | -0.275966667 | -0.174533333 |
| LOC100133045 | -0.119833333 | -0.0106      | -0.024133333 | 0.050133333  |
| TMED2        | 0.092566667  | 0.037066667  | -0.120066667 | 0.034966667  |
| SNORA5C      | 0.054266667  | -0.009533333 | -0.097366667 | 0.0521       |
| TMCO3        | -0.0652      | -0.123766667 | -0.1214      | -0.1384      |
| PSME1        | -0.167266667 | -0.1272      | -0.049066667 | -0.017866667 |
| RDM1         | -0.245233333 | 0.061966667  | 0.0596       | -0.189566667 |
| CMBL         | -0.224066667 | -0.0317      | -0.141866667 | -0.188933333 |
| GOLGA1       | -0.144566667 | -0.1021      | -0.1509      | -0.116533333 |
| KLHL2        | -0.054133333 | -0.003766667 | -0.0641      | -0.077433333 |
| DDX19-DDX19L | -0.031866667 | 0.044066667  | -0.009233333 | -0.002566667 |

|              |              |              |              |              |
|--------------|--------------|--------------|--------------|--------------|
| SNX14        | 0.005333333  | 0.0235       | -0.0663      | 0.0302       |
| FRMD6        | 0.211066667  | 0.093966667  | -0.282133333 | 0.094466667  |
| ABTB2        | 0.0993       | 0.178566667  | 0.0044       | 0.220966667  |
| MYBBP1A      | 0.036466667  | 0.1304       | 0.013933333  | 0.148666667  |
| CAMSAP1L1    | 0.0437       | 0.025        | -0.1844      | 0.0359       |
| RASA4P       | 0.1415       | -0.171433333 | -0.040233333 | 0.034233333  |
| ORMDL2       | 0.0213       | 0.035066667  | 0.012466667  | 0.0048       |
| PPA1         | -0.083566667 | -0.0418      | 0.085633333  | 0.0907       |
| LOC729417    | -0.177366667 | -0.236866667 | -0.094866667 | -0.024733333 |
| BRD7         | -0.1438      | -0.013433333 | -0.040933333 | -0.044566667 |
| USP33        | 0.070566667  | 0.023766667  | 0.050933333  | 0.136166667  |
| LOC441246    | 0.086666667  | -0.007833333 | 0.079233333  | 0.165033333  |
| LOC100130353 | -0.056       | 0.008333333  | -0.080833333 | -0.019233333 |
| UHRF2        | -0.026333333 | 0.057933333  | -0.069333333 | -0.0324      |
| POLR1C       | 0.222566667  | 0.080833333  | 0.054466667  | 0.273266667  |
| DUT          | -0.074266667 | 0.086166667  | -0.039533333 | -0.022033333 |
| POMP         | 0.242333333  | -0.022033333 | 0.003733333  | 0.222233333  |
| ZNF570       | -0.045066667 | -0.077566667 | -0.1222      | 0.0965       |
| ZNF184       | 0.056233333  | -0.019366667 | -0.146233333 | -0.0258      |
| HIATL2       | -0.053733333 | 0.130066667  | 0.1869       | -0.008966667 |
| LOC100132973 | -0.156033333 | 0.105166667  | 0.0324       | 0.049733333  |
| C17orf98     | -0.0389      | 0.005133333  | -0.085066667 | -0.0311      |
| FBXO21       | -0.064066667 | -0.202933333 | -0.035566667 | -0.018933333 |
| C10orf28     | 0.0265       | -0.274433333 | 0.009566667  | -0.0428      |
| LOC645489    | -0.029266667 | -0.1152      | -0.216066667 | -0.012433333 |
| MORF4L1      | -0.071033333 | -0.1085      | -0.0931      | -0.0461      |
| LOC100133823 | 0.1084       | 0.015333333  | 0.012233333  | 0.011866667  |
| LOC389168    | 0.006233333  | -0.030333333 | -0.006766667 | 0.069466667  |
| MRPL36       | 0.227733333  | 0.290233333  | 0.0936       | 0.3282       |
| CIAO1        | -0.2911      | -0.0043      | 0.0153       | -0.017866667 |
| ZNF398       | -0.070666667 | -0.053833333 | -0.0355      | 0.017166667  |
| VIPR1        | -0.012466667 | -0.052       | 0.130933333  | 0.1109       |
| DNAL4        | -0.250966667 | -0.1135      | -0.269166667 | -0.236033333 |
| AP4B1        | 0.112866667  | 0.1782       | -0.074033333 | 0.161333333  |
| B4GALT2      | -0.0064      | -0.086566667 | 0.0658       | 0.0228       |
| CHMP5        | 0.0767       | -0.1459      | 0.014933333  | -0.0499      |
| COL5A2       | -0.038433333 | -0.1115      | -0.051033333 | -0.0587      |
| CTXN1        | 0.198766667  | 0.064933333  | -0.429066667 | -0.0252      |
| LOC652471    | 0.0417       | 0.0186       | -0.119166667 | 0.008566667  |
| LEP          | -0.1404      | 0.057133333  | 0.0869       | -0.201033333 |
| UBE2D4       | -0.318866667 | -0.0465      | -0.192466667 | -0.014133333 |
| LOC642784    | 0.0578       | 0.0712       | 0.160366667  | 0.264133333  |
| LOC645693    | -0.4812      | 0.0951       | -0.540766667 | -0.4373      |
| LOC732432    | 0.146166667  | 0.034966667  | -0.031566667 | 0.009        |
| LOC100131643 | 0.0715       | 0.1241       | 0.024166667  | 0.2383       |
| LOC100129034 | -0.034333333 | 0.037833333  | -0.161133333 | -0.046666667 |
| WDR75        | 0.122533333  | 0.136266667  | 0.023233333  | 0.1782       |

|              |              |              |              |              |
|--------------|--------------|--------------|--------------|--------------|
| METT5D1      | -0.116133333 | 0.050433333  | -0.142166667 | -0.011533333 |
| LSMD1        | -0.191566667 | -0.151166667 | 0.2253       | -0.0126      |
| C9orf114     | 0.0235       | 0.048166667  | 0.0741       | 0.044433333  |
| LOC100129335 | 0.003833333  | 0.0239       | -0.0939      | 0.105233333  |
| TIMM23B      | 0.0927       | -0.073733333 | 0.085666667  | 0.021166667  |
| ALAS1        | 0.1772       | 0.061033333  | 0.054966667  | 0.303133333  |
| PALB2        | 0.0542       | -0.011366667 | -0.006566667 | 0.111333333  |
| SNORD25      | 0.113433333  | 0.0081       | -0.050133333 | 0.097366667  |
| ZC3H11A      | -0.130033333 | 0.058966667  | -0.0136      | -0.141566667 |
| LOC643387    | 0.106466667  | 0.192633333  | -0.012666667 | 0.266666667  |
| KCNK4        | 0.039033333  | -0.095933333 | 0.184066667  | 0.088166667  |
| MIR125B2     | 0.0677       | -0.222766667 | 0.014033333  | 0.027633333  |
| ATP6V1F      | -0.037966667 | -0.2647      | -0.0538      | -0.027233333 |
| GTPBP8       | -0.090366667 | 0.1858       | -0.0481      | 0.0742       |
| PLA2G15      | 0.037466667  | -0.116866667 | -0.099366667 | 0.033533333  |
| ZSWIM3       | -0.058466667 | -0.147733333 | -0.010733333 | 0.093733333  |
| C21orf2      | -0.0264      | -0.176566667 | -0.0929      | -0.0889      |
| LOC653219    | 0.0148       | -0.0094      | -0.0394      | 0.020433333  |
| LOC391769    | -0.2228      | 0.227833333  | -0.2159      | -0.179233333 |
| CRAT         | -0.109766667 | -0.168233333 | -0.153833333 | -0.167166667 |
| TTC30B       | -0.1469      | -0.131033333 | -0.181566667 | -0.0417      |
| SNORD96B     | -0.052033333 | 0.030466667  | 0.022666667  | 0.002133333  |
| MRPL28       | 0.0487       | 0.1014       | 0.011333333  | 0.050533333  |
| LOC642947    | -0.107866667 | 0.062266667  | 0.1316       | -0.1043      |
| NEK3         | -0.0634      | 0.004866667  | -0.039333333 | 0.068333333  |
| PLS1         | 0.074766667  | 0.046433333  | 0.267166667  | 0.099233333  |
| MGC16121     | -0.149066667 | -0.228766667 | -0.1532      | -0.209133333 |
| CBWD3        | -9.00E-04    | -0.109933333 | 0.113433333  | 0.038866667  |
| SF3B3        | -0.018266667 | 0.041        | 0.0384       | 0.101133333  |
| TAF1D        | -0.188266667 | -0.1924      | -0.084766667 | -0.155533333 |
| LOC653105    | 0.2048       | 0.129966667  | 0.174266667  | 0.1215       |
| HSF2         | 0.0795       | -0.027166667 | 0.0109       | 0.042866667  |
| LILRB3       | -0.1756      | -0.023766667 | 0.164566667  | -0.163166667 |
| ATF6B        | -0.1381      | -0.0868      | -0.035233333 | -0.160566667 |
| RPL21        | -0.041466667 | -0.042433333 | 0.0134       | 0.0605       |
| ERGIC3       | -0.106233333 | -0.173666667 | -0.086033333 | -0.003133333 |
| LOC100131810 | 0.003133333  | -0.0757      | -0.0795      | -0.0478      |
| SNORA8       | 0.043866667  | -0.0422      | -0.0217      | -0.006833333 |
| PRKD2        | 0.042733333  | 0.0157       | -0.118866667 | -0.0098      |
| STX10        | -0.044166667 | -0.0594      | -0.151933333 | -0.0382      |
| LOC146177    | 0.015166667  | -0.079566667 | -0.063866667 | 0.120033333  |
| UBC          | -0.088966667 | -0.080166667 | 0.0349       | -0.0145      |
| TCHP         | 0.012866667  | 0.029833333  | 0.0223       | 0.038133333  |
| DLK2         | 0.0744       | 0.012066667  | -0.135466667 | -0.0231      |
| WDR37        | 0.094        | -0.0779      | -0.073233333 | 0.156666667  |
| RPS14        | -0.0742      | 0.013466667  | -0.049166667 | 0.048633333  |
| PPP4C        | 0.053366667  | 0.0437       | -0.067733333 | 0.037866667  |

|              |              |              |              |              |
|--------------|--------------|--------------|--------------|--------------|
| ZNF675       | -0.2219      | 0.0471       | 0.005633333  | -0.103866667 |
| EPDR1        | -0.096733333 | 0.003666667  | -0.071433333 | 0.002033333  |
| DOLPP1       | 0.117        | 0.0125       | 0.0675       | 0.146        |
| RPLP2        | -0.007733333 | -0.048366667 | -0.053666667 | -0.001766667 |
| RPL24        | 0.009066667  | -0.057766667 | -0.031333333 | -0.052766667 |
| DGCR8        | 0.046766667  | 0.039133333  | -0.061       | 0.045033333  |
| CDC5L        | 0.057266667  | -0.055766667 | -0.007533333 | -0.0106      |
| COL8A2       | 0.121466667  | -0.142       | -0.040666667 | 0.1569       |
| STARD3       | 0.0088       | -0.074466667 | -0.019266667 | 0.079566667  |
| NOL9         | 0.101266667  | 0.1526       | 0.046233333  | 0.1284       |
| CHMP7        | 0.126033333  | -0.1074      | 0.076766667  | -0.023666667 |
| KTI12        | 0.097366667  | -0.005033333 | 2.31E-18     | 0.095666667  |
| LOC100133887 | 0.000833333  | -0.013333333 | -0.055033333 | -0.006333333 |
| KIAA0240     | -0.197333333 | -0.166333333 | -0.040233333 | -0.129066667 |
| CLEC11A      | -0.087333333 | -0.086233333 | -0.027066667 | -0.047233333 |
| GDI1         | 0.232533333  | 0.1176       | -0.0923      | 0.1229       |
| SLC25A14     | 0.1343       | 0.011633333  | -0.016966667 | 0.0073       |
| LOC646936    | 0.024133333  | 0.0408       | 0.026633333  | 0.016933333  |
| LOC646630    | 0.016733333  | -0.002333333 | 0.0199       | 0.050333333  |
| THAP7        | 0.0327       | 0.0929       | 0.025766667  | 0.059233333  |
| LPCAT4       | -0.065       | 0.049766667  | -0.110633333 | -0.1099      |
| TMEM38B      | -0.216566667 | -0.019733333 | 0.067        | -0.071966667 |
| BRD3         | -0.2552      | -0.073033333 | -0.0091      | -0.147066667 |
| KRT6B        | -0.0104      | -0.038733333 | 0.0212       | 0.0359       |
| C17orf106    | -0.0342      | -0.099466667 | 0.012366667  | 0.046566667  |
| LRRC14       | -0.171066667 | -0.0597      | -0.158333333 | -0.0794      |
| LOC730153    | -0.077366667 | 0.0384       | -0.119066667 | 0.030266667  |
| ARNT         | -0.057166667 | -0.1074      | -0.046766667 | -0.0551      |
| SSTR2        | -0.181433333 | 0.1458       | -0.128366667 | -0.267533333 |
| SCO1         | 0.020633333  | -0.0465      | 0.0727       | 0.061733333  |
| KBTBD6       | 0.045066667  | -0.026166667 | -0.06        | 0.083933333  |
| PHEX         | 0.003966667  | 0.0768       | -0.108533333 | 0.0304       |
| LOC92249     | -0.0729      | -0.0536      | 0.0641       | 0.168633333  |
| AP2S1        | 0.137666667  | -0.005933333 | 0.0979       | 0.0465       |
| LOC100130557 | -0.2009      | -0.034933333 | -0.021966667 | -0.107233333 |
| CLIP4        | -0.102766667 | -0.307066667 | -0.2089      | -0.185066667 |
| LOC100129982 | -0.233666667 | 0.0336       | -0.2614      | -0.228533333 |
| AP2A1        | 0.066566667  | -0.0094      | -0.045333333 | -0.032533333 |
| CDC123       | 0.1739       | -0.0341      | 0.118766667  | 0.090733333  |
| MEIS2        | -0.1421      | -0.143666667 | -0.083466667 | -0.205033333 |
| BSG          | -0.141766667 | -0.122966667 | -0.175766667 | -0.214066667 |
| MX2          | -0.0144      | 0.031633333  | -0.1078      | 0.036966667  |
| CABYR        | -0.0226      | 0.005366667  | -0.0733      | -0.043733333 |
| LOC645969    | 0.3035       | 0.01         | 0.116533333  | 0.147        |
| EME1         | 0.026866667  | 0.084        | -0.1091      | -0.033266667 |
| ZBTB11       | -0.277966667 | -0.1143      | -0.061866667 | -0.1814      |
| PRKX         | -0.0176      | 0.024666667  | -0.130533333 | 0.017033333  |

|              |              |              |              |              |
|--------------|--------------|--------------|--------------|--------------|
| XIAP         | -0.063433333 | -0.0444      | -0.0459      | -0.034266667 |
| EFHD2        | 0.288933333  | 0.2801       | 0.119333333  | 0.2587       |
| TRIM45       | 0.048966667  | -0.0876      | -0.214733333 | -0.0564      |
| LOC729776    | -0.288066667 | -0.1112      | 0.007766667  | -0.128366667 |
| NDUFA2       | -0.2052      | -0.213933333 | 0.1129       | -0.0982      |
| LOC441711    | 0.013466667  | -0.0567      | -0.061566667 | -0.175566667 |
| LOC653881    | -0.290266667 | -0.1085      | -0.012333333 | -0.135566667 |
| IMAA         | -0.0056      | -0.057033333 | -0.032033333 | 0.006066667  |
| ZNF567       | 0.032933333  | 0.007633333  | -0.076233333 | 0.1029       |
| SENP6        | 0.0446       | -0.022533333 | -0.092966667 | 0.003533333  |
| SH3BP4       | -0.201866667 | -0.302966667 | -0.1575      | -0.1049      |
| LOC729102    | 0.122766667  | -0.087       | 0.0109       | 0.0178       |
| LOC100129022 | -0.075666667 | -0.030433333 | 0.0384       | 0.1186       |
| PRPF6        | -0.0103      | -0.0478      | 0.018633333  | 0.0731       |
| PRCC         | -0.051033333 | 0.033266667  | -0.0666      | 0.030433333  |
| DEAF1        | -0.0443      | -0.179433333 | -0.068966667 | -0.0647      |
| LOC730754    | -0.048266667 | -0.0819      | -0.110566667 | -0.103533333 |
| TMEM216      | -0.071833333 | 0.043166667  | -0.070166667 | 0.161333333  |
| RFK          | -0.027266667 | 0.072333333  | 0.067733333  | 0.0708       |
| CDK5RAP3     | -0.1946      | -0.1882      | -0.057833333 | -0.119866667 |
| SAMD6        | -0.011133333 | 0.0621       | 0.001966667  | 0.144266667  |
| C5orf41      | -0.7703      | -0.604966667 | -0.219066667 | -0.414466667 |
| NDUFA5       | -0.1753      | 0.0168       | -0.1439      | -0.0614      |
| LOC100132805 | 0.077833333  | 0.0755       | -0.0236      | 0.1705       |
| ICA1         | -0.2437      | -0.121466667 | -0.087533333 | -0.139033333 |
| RPL23        | -0.111433333 | -0.008       | -0.059966667 | -0.0317      |
| PTGR2        | -0.252433333 | 0.506833333  | 0.073366667  | -0.079366667 |
| LMTK2        | -0.073033333 | -0.017933333 | 0.0399       | 0.046        |
| IKZF2        | 0.002433333  | -0.034266667 | -0.0624      | 0.015933333  |
| LOC728476    | 0.105866667  | -0.1974      | 0.222766667  | 0.268333333  |
| LOC392008    | -0.273166667 | 0.059966667  | -0.1013      | -0.152966667 |
| RPL38        | -0.025266667 | -0.005166667 | -0.096733333 | -0.019466667 |
| LOC650321    | -0.212766667 | 0.040433333  | -0.145066667 | -0.159833333 |
| NEFH         | 0.067866667  | -0.1005      | 0.003666667  | 0.016533333  |
| SART3        | 0.011333333  | 0.009733333  | 0.062833333  | 0.119566667  |
| CCDC74B      | -0.156166667 | 0.0002       | 0.071833333  | -0.0814      |
| KRR1         | 0.089533333  | 0.159933333  | 0.027233333  | 0.147666667  |
| NACC1        | 0.156966667  | 0.015766667  | -0.004233333 | 0.1132       |
| RNF121       | 0.0111       | -0.1319      | -0.003366667 | 0.058333333  |
| GMEB2        | 0.0735       | 0.036066667  | 0.077766667  | 0.0825       |
| RCADH5       | -0.101166667 | -0.060466667 | -0.141933333 | -0.124666667 |
| CDC37        | 0.138333333  | -0.074766667 | -0.1378      | 0.004566667  |
| LOC100130562 | 0.073333333  | -0.184033333 | 0.0125       | -0.0726      |
| KIAA0319L    | -0.171966667 | -0.141266667 | -0.118666667 | -0.057266667 |
| RFWD2        | -0.058366667 | -0.026066667 | -0.0787      | 0.042666667  |
| LRRC8D       | -0.0499      | 0.1081       | 0.041533333  | -0.1068      |
| RPS16        | 0.0372       | -0.112933333 | -0.021033333 | -0.0366      |



|              |              |              |              |              |
|--------------|--------------|--------------|--------------|--------------|
| MGC61598     | -0.284666667 | 0.150033333  | -0.206933333 | -0.1688      |
| CAPN1        | -0.0154      | -0.098633333 | -0.105333333 | 0.025266667  |
| TADA2B       | -0.049266667 | -0.015833333 | -0.003566667 | 0.142        |
| TAF6         | -0.120233333 | 0.046066667  | 0.061633333  | 0.0337       |
| LOC100134159 | -0.138733333 | -0.053533333 | 0.013566667  | -0.207833333 |
| APH1A        | -0.165933333 | -0.063466667 | -0.047166667 | -0.243533333 |
| HNRNPC       | 0.111233333  | 0.083866667  | 0.0343       | 0.155866667  |
| NUSAP1       | -0.024566667 | -0.0109      | 0.084866667  | 0.061166667  |
| ZNF830       | -0.008166667 | -0.087666667 | -0.097633333 | 0.1172       |
| CT45A6       | -0.063266667 | -0.033066667 | 0.019733333  | -0.006466667 |
| ALDH5A1      | 0.022633333  | 0.072866667  | -0.050533333 | 0.146966667  |
| ZNF763       | -0.048733333 | -0.051066667 | -0.132933333 | -0.060133333 |
| TMEM207      | 0.004733333  | 0.001033333  | -0.130333333 | 0.169166667  |
| EPR1         | 0.0822       | 0.024366667  | 0.109633333  | 0.081233333  |
| IL25         | -0.129366667 | -0.1141      | -0.048866667 | 0.067833333  |
| LOC644237    | 0.090233333  | -0.0368      | 0.098566667  | 0.123766667  |
| C2orf63      | -0.162866667 | -0.050266667 | -0.0888      | -0.0645      |
| LOC347292    | -0.012633333 | -0.2361      | -0.018433333 | 0.0067       |
| FNIP1        | -0.020366667 | -0.271766667 | -0.1362      | -0.067633333 |
| ZNF600       | -0.147033333 | 0.1462       | -0.114233333 | -0.0596      |
| CTNBL1       | 0.0684       | 0.0785       | -0.014233333 | 0.092766667  |
| BAT5         | -0.101966667 | -0.049166667 | -0.031033333 | -0.037       |
| CPNE1        | -0.1391      | -0.112       | 0.0375       | 0.009566667  |
| SGCB         | -0.029       | 0.072666667  | -0.171133333 | -0.098366667 |
| LOC642443    | -0.019866667 | -0.0918      | -0.029       | -0.171733333 |
| HERC6        | -0.118533333 | -0.0239      | 0.0704       | 0.0455       |
| CNOT7        | 0.141266667  | 0.1575       | 0.041366667  | 0.030666667  |
| NUDT2        | -0.0999      | -0.155333333 | -0.164166667 | -0.041266667 |
| ATR          | -0.093333333 | 0.033933333  | -0.098333333 | -0.071933333 |
| SERPINB1     | -0.309833333 | -0.092933333 | 0.003533333  | -0.139933333 |
| ATN1         | 0.008766667  | 0.079466667  | -0.125       | 0.0019       |
| NIPSNAP1     | -0.4357      | -0.1188      | 0.2107       | -0.166566667 |
| LOC647012    | 0.053033333  | -0.057266667 | -0.0091      | 0.0499       |
| NGLY1        | 0.1036       | 0.0472       | -0.075933333 | 0.0191       |
| RPS18        | -0.030033333 | -0.107133333 | 0.030266667  | 0.023266667  |
| PRCP         | -0.1854      | -0.151833333 | -0.130366667 | -0.215133333 |
| LOC440991    | -0.065866667 | -0.0868      | -0.0891      | -0.040566667 |
| CST3         | 0.009466667  | -0.196233333 | -0.083366667 | 0.0145       |
| ETV6         | 0.107833333  | -0.018633333 | 0.067266667  | 0.073366667  |
| LOC654123    | -0.2389      | 0.050966667  | -0.2055      | -0.140433333 |
| FAM83F       | -0.0071      | -0.0283      | -0.076733333 | 0.0703       |
| C17orf39     | -0.1713      | -0.011966667 | -0.1801      | -0.0031      |
| LOC100130276 | -0.197733333 | 0.316533333  | -0.063933333 | -0.2486      |
| XAGE1C       | -0.0239      | -0.002866667 | -0.048033333 | 0.0277       |
| SKA1         | 0.039        | 0.107566667  | 0.080633333  | 0.275233333  |
| RPS21        | 0.0099       | -0.0412      | -0.0548      | -0.065866667 |
| ALS2CR14     | -0.1652      | 0.217433333  | 0.001866667  | -0.059333333 |

|              |              |              |              |              |
|--------------|--------------|--------------|--------------|--------------|
| KIAA1715     | -0.103366667 | 0.0359       | -0.110333333 | -0.0947      |
| CICK0721Q.1  | -0.3328      | 0.087533333  | -0.2242      | -0.246366667 |
| ELK1         | 0.0472       | 0.181        | 0.0321       | 0.1938       |
| PARP14       | -0.0884      | -0.185466667 | 0.0376       | 0.061133333  |
| PCSK7        | -0.206733333 | -0.0379      | -0.067433333 | -0.114666667 |
| OR9A4        | -0.023533333 | -0.103966667 | -0.0365      | 0.0177       |
| LOC100131541 | -0.2407      | 0.109233333  | -0.113933333 | -0.284466667 |
| ZNF576       | -0.024066667 | 0.109866667  | 0.054        | 0.082733333  |
| RPS6KC1      | -0.031566667 | -0.113633333 | -0.099933333 | -0.132066667 |
| NBAS         | -0.0813      | -0.126966667 | -0.0525      | 0.038966667  |
| LOC440396    | 0.037033333  | 0.1061       | -0.0726      | -0.123333333 |
| CD99L2       | -0.3251      | -0.207566667 | -0.0404      | -0.1785      |
| THUMPD1      | 0.020066667  | -0.007733333 | -0.103       | 0.090966667  |
| CEP55        | 0.1473       | 0.108966667  | -0.0444      | 0.116        |
| NUFIP1       | -0.035666667 | 0.009766667  | 0.225666667  | 0.112466667  |
| VPS13C       | -0.131833333 | -0.001       | 0.0892       | -0.037133333 |
| LOC100134868 | -0.032133333 | 0.0502       | -0.1025      | -0.204533333 |
| LOC81691     | -0.0584      | 0.106566667  | 0.0504       | 0.1016       |
| PPIE         | -0.0665      | -0.161       | -0.021033333 | 0.051033333  |
| BARD1        | 0.126866667  | 0.0307       | -0.0264      | 0.107366667  |
| SLC5A8       | -0.247366667 | 0.134066667  | -0.0253      | -0.153433333 |
| FLJ21865     | -0.1313      | -0.049566667 | -0.025433333 | -0.0312      |
| SAGE1        | -0.045633333 | 0.022633333  | -0.014333333 | -0.0245      |
| PSMA3        | -0.0226      | 0.1212       | 0.027533333  | 0.1645       |
| LOC646819    | -0.1384      | 0.004166667  | -0.0162      | 0.0345       |
| LOC92755     | 0.218133333  | 0.013133333  | 0.227533333  | 0.222466667  |
| PGP          | 0.002366667  | -0.002766667 | -0.038966667 | 0.1125       |
| MRPL39       | 0.058466667  | 0.116633333  | 0.079133333  | 0.166166667  |
| MIR300       | -0.138433333 | 0.0374       | -0.012166667 | 0.129433333  |
| MUTED        | -0.328366667 | -0.090833333 | -0.114733333 | -0.145333333 |
| LOC728590    | -0.0724      | 0.009333333  | -0.176766667 | -0.067566667 |
| PPIAL4A      | 0.014533333  | -0.068466667 | 0.003066667  | -0.025066667 |
| C8orf48      | -0.073333333 | -0.0551      | -0.042       | 0.082466667  |
| C19orf42     | 0.030966667  | -0.084233333 | -0.218166667 | -0.001933333 |
| MAGEA3       | 0.157133333  | 0.019        | 0.0498       | 0.1515       |
| KIAA1524     | 0.2661       | 0.101066667  | -0.0657      | 0.179233333  |
| SLBP         | 0.097866667  | 0.139966667  | 0.0982       | 0.074233333  |
| SCMH1        | -0.229866667 | -0.1193      | -0.0517      | -0.102533333 |
| SLC25A22     | 0.252333333  | 0.2978       | 0.195966667  | 0.262233333  |
| FAM20B       | -0.039333333 | 0.013533333  | 0.1901       | -0.015566667 |
| TMEM128      | -0.201533333 | 0.185466667  | -0.1566      | -0.128766667 |
| LOC645174    | 0.049066667  | -0.084466667 | -0.060233333 | -0.032533333 |
| LOC728953    | -0.0215      | 0.100533333  | 0.0426       | 0.178566667  |
| STK38        | -0.0178      | -0.028933333 | -0.049633333 | -0.017766667 |
| TMEM127      | 0.009766667  | -0.224633333 | -0.035866667 | 0.076766667  |
| GEMIN8       | -0.201533333 | 0.006133333  | -0.085766667 | -0.0281      |
| MOGS         | 0.009966667  | -0.071366667 | -0.0544      | -0.026466667 |

|              |              |              |              |              |
|--------------|--------------|--------------|--------------|--------------|
| TM9SF2       | -0.215533333 | -0.1109      | 0.019833333  | -0.135933333 |
| LOC389049    | 0.106733333  | 0.1227       | 0.0512       | 0.138233333  |
| ACTB         | 0.205866667  | 0.086333333  | -0.06        | 0.215833333  |
| TRIM65       | -0.090433333 | 0.0423       | -0.0923      | 0.0504       |
| FAM50B       | -0.056166667 | -0.0281      | -0.057366667 | -0.062633333 |
| UNC119B      | -0.007766667 | -0.096966667 | -0.108533333 | 0.064966667  |
| NDUF2F2      | 0.006766667  | 0.023866667  | -0.0303      | 0.033033333  |
| MAP4         | 0.005833333  | 0.066833333  | -0.109366667 | -0.084266667 |
| LOC728244    | -0.1537      | -0.001       | -0.027966667 | -0.002       |
| HERC2P2      | -0.0805      | -0.029933333 | 0.1217       | -0.003966667 |
| LOC100129191 | 0.001366667  | 0.0381       | -0.0665      | 0.089133333  |
| INO80E       | 0.248633333  | 0.182566667  | -0.088566667 | 0.1433       |
| FAM173A      | -0.261966667 | -0.1536      | -0.011066667 | -0.1995      |
| QTRTD1       | 0.200566667  | 0.183        | 0.124633333  | 0.297366667  |
| LOC645492    | 0.0727       | 0.0174       | 0.031766667  | 0.114566667  |
| UBR1         | 0.073466667  | 0.0343       | -0.081366667 | -0.0125      |
| LOC644632    | -0.083966667 | 0.0476       | 0.0044       | -0.0159      |
| C12orf65     | 0.020333333  | -0.066633333 | 0.0294       | 0.045333333  |
| LOC401433    | 0.139566667  | -0.15        | -0.118766667 | -0.036533333 |
| LOC286157    | 0.0042       | -0.1855      | -0.094333333 | -0.116533333 |
| VPS41        | -0.2151      | -0.1335      | -0.076466667 | -0.071466667 |
| LOC100130071 | 0.078766667  | -0.067733333 | 0.0863       | 0.1756       |
| HSDL1        | -0.162       | -0.0189      | -0.006466667 | -0.085766667 |
| URB1         | 0.011233333  | -0.036766667 | -0.080366667 | -0.1174      |
| PDK2         | -0.092966667 | -0.168833333 | -0.212366667 | -0.113066667 |
| CRYZ         | 0.0188       | -0.017733333 | -0.020866667 | 0.023866667  |
| LOC134466    | -0.065666667 | 0.001633333  | 0.0078       | -0.0345      |
| RAPGEF6      | 0.007166667  | 0.104366667  | 0.110633333  | 0.021566667  |
| USH1G        | 0.110233333  | -0.0055      | -0.076533333 | 0.0634       |
| SCNM1        | 0.068166667  | -0.084733333 | -0.258433333 | -0.0679      |
| PRKAB2       | -0.005133333 | -0.1455      | -0.291766667 | -0.087233333 |
| TAGLN3       | 0.005133333  | -0.006233333 | 0.073133333  | 0.108466667  |
| ZNF446       | -0.135233333 | -0.168466667 | -0.116       | -0.052566667 |
| ITIH5        | -0.011533333 | -0.0026      | -0.013866667 | -0.0118      |
| DHDDS        | 0.011        | -0.082133333 | -0.113733333 | 0.026933333  |
| MIPOL1       | -0.024866667 | 0.030966667  | -0.112066667 | -0.117233333 |
| C19orf31     | -0.017266667 | -0.055866667 | -0.0332      | -0.017766667 |
| NR2C1        | -0.359066667 | -0.005133333 | 0.039266667  | -0.1607      |
| LONP2        | -0.297066667 | -0.036033333 | 0.0384       | -0.090666667 |
| LOC401019    | -0.071033333 | -0.061633333 | 0.064533333  | -0.007266667 |
| NACA2        | -0.2428      | -0.024066667 | -0.3392      | -0.4348      |
| WDR79        | 0.045466667  | 0.0906       | 0.053333333  | 0.1247       |
| KIAA1128     | 0.120533333  | -0.039166667 | -0.1368      | 0.108566667  |
| KLHL17       | -0.047033333 | 0.006466667  | -0.091533333 | -0.018366667 |
| GPRC5A       | 0.0298       | -0.0227      | 0.017566667  | 0.075166667  |
| LOC100129759 | -0.0042      | 0.259533333  | 0.120466667  | 0.0762       |
| LOC643668    | 0.1834       | 0.0121       | -0.1488      | 0.087166667  |

|                |              |              |              |              |
|----------------|--------------|--------------|--------------|--------------|
| CATSPER2P1     | -0.225866667 | -0.062       | 0.016733333  | -0.178       |
| KIAA0889       | 0.021766667  | 0.1066       | 0.0381       | -0.029233333 |
| TBC1D20        | -0.181666667 | -0.334633333 | -0.179866667 | -0.1553      |
| LOC646547      | -0.146533333 | 0.106433333  | -0.140233333 | -0.065466667 |
| FAM134A        | -0.2377      | -0.2619      | -0.104       | -0.084333333 |
| GRAMD1A        | -0.049966667 | -0.2516      | 0.059533333  | -0.105466667 |
| IFNAR1         | -0.133633333 | 0.011966667  | -0.0506      | -0.121266667 |
| FLJ36131       | 0.0421       | 0.397533333  | 0.2087       | 0.126333333  |
| USP30          | 0.0619       | -0.006733333 | -0.032       | -0.067666667 |
| CBWD1          | -0.1879      | 0.2057       | -0.248933333 | -0.120466667 |
| ANGPTL2        | 0.061866667  | -0.0602      | 0.008533333  | -0.020666667 |
| LOC653162      | 0.014866667  | -0.045533333 | -0.1068      | -0.0522      |
| LOC646103      | 0.023        | -0.340166667 | 0.134933333  | 0.156133333  |
| MCM3AP         | 0.211833333  | 0.0185       | -0.072766667 | 0.072633333  |
| RPS26P10       | -0.044266667 | 0.153266667  | -0.061433333 | 0.0162       |
| PPP2R4         | 0.111966667  | -0.0541      | -0.0789      | 0.078933333  |
| SLC2A3         | 0.155966667  | -0.219466667 | 0.186566667  | 0.1308       |
| LRIG3          | 0.079166667  | 0.0013       | 0.088933333  | 0.1983       |
| MGC71993       | -0.168       | -0.124       | 0.020233333  | -0.085233333 |
| ARFIP1         | -0.003233333 | 0.076633333  | -0.074966667 | -0.040466667 |
| LOC100134108   | -0.0381      | -0.028166667 | 0.015866667  | 0.132766667  |
| LOC100132771   | -0.041466667 | -0.020666667 | 0.041        | 0.067633333  |
| C17orf70       | -0.026533333 | -0.096133333 | 0.096733333  | 0.0714       |
| LBR            | 0.3159       | 0.2466       | 0.138133333  | 0.2332       |
| ZNF544         | -0.0095      | 0.232833333  | 0.005866667  | 0.0284       |
| ZNF512         | -0.177       | -0.063666667 | -0.024233333 | -0.133066667 |
| EGLN1          | 0.0488       | 0.0144       | -0.0278      | -0.011466667 |
| DKFZp686O24166 | -0.0164      | -0.0112      | 0.1633       | 0.127966667  |
| LYPLA2P1       | 0.155566667  | 0.074666667  | 0.053666667  | 0.0805       |
| PFDN4          | -0.0997      | -0.1433      | -0.001266667 | -0.088166667 |
| REST           | 0.1135       | 0.068966667  | -0.124133333 | -0.000333333 |
| ADAR           | 0.0332       | -0.0646      | -0.077166667 | -0.001033333 |
| TRMT6          | 0.1439       | 0.171866667  | 0.261966667  | 0.223966667  |
| SMYD5          | 0.007533333  | 0.0326       | -0.092433333 | -0.013166667 |
| DEF8           | 0.079766667  | 0.177466667  | -0.0536      | 0.232033333  |
| RPL5           | 0.051266667  | -0.088566667 | -0.089633333 | 0.104066667  |
| LOC100129141   | 0.060933333  | 0.0355       | -0.1353      | 0.013766667  |
| TYSND1         | -0.269566667 | -0.0451      | 0.061466667  | 0.0478       |
| LOC644584      | 0.237566667  | -0.0582      | 0.0233       | 0.070133333  |
| C5orf30        | 0.149633333  | -0.159333333 | 0.056133333  | -0.010666667 |
| TRIM66         | -0.1011      | -0.158366667 | -0.070566667 | -0.094133333 |
| RBBP6          | -0.188533333 | -0.114033333 | 0.055833333  | -0.097266667 |
| MDH2           | -0.007333333 | 0.119566667  | -0.000666667 | 0.088066667  |
| GNAI1          | -0.081966667 | -0.1039      | -0.1189      | -0.200866667 |
| LOC100128425   | 0.119033333  | -0.104066667 | 0.0565       | 0.098766667  |
| SETD6          | -0.0981      | -0.002533333 | -0.023566667 | -0.0162      |
| MTG1           | 0.016266667  | 0.165366667  | -0.069       | -0.019033333 |

|              |              |              |              |              |
|--------------|--------------|--------------|--------------|--------------|
| LOC644877    | 0.1808       | 0.1564       | 0.063066667  | 0.025966667  |
| UBL4A        | 0.049166667  | 0.054666667  | -0.042233333 | -0.071066667 |
| MTMR3        | 0.1158       | -0.3532      | -0.294066667 | -0.023366667 |
| GRWD1        | 0.239566667  | 0.335833333  | 0.049933333  | 0.254        |
| KIAA0195     | -0.110566667 | -0.1018      | -0.0481      | -0.074733333 |
| LOC730246    | 0.116366667  | -0.024233333 | 0.0128       | 0.132766667  |
| SRP72        | 0.050333333  | 0.062033333  | -0.013566667 | 0.104566667  |
| LOC649214    | 0.096833333  | 0.1563       | -0.080333333 | -0.034833333 |
| NDUFA6       | -0.0772      | -0.0226      | -0.192466667 | 0.0757       |
| LOC440900    | 0.065766667  | -0.069233333 | -0.0109      | 0.112733333  |
| LOC390671    | -0.035133333 | -0.0232      | -0.0803      | 0.0769       |
| C14orf19     | -0.2513      | -0.027433333 | -0.1182      | -0.147033333 |
| SLC35A4      | 0.0664       | -0.082066667 | -0.010133333 | 0.0479       |
| IGFBP4       | -0.037666667 | -0.0051      | -0.013166667 | 0.0166       |
| CENPB        | 0.0516       | 0.025066667  | 0.0541       | 0.076166667  |
| UBL5         | 0.1791       | 0.0334       | 0.154933333  | 0.186133333  |
| LOC100132425 | 0.0135       | 0.5649       | -0.1139      | 0.0795       |
| LOC646483    | -0.098933333 | -0.1203      | 0.027        | 0.011733333  |
| CCDC126      | 0.142366667  | -0.026233333 | -0.220766667 | 0.102633333  |
| PEX16        | -0.064733333 | -0.251933333 | -0.2686      | -0.095633333 |
| EXTL3        | -0.102333333 | -0.018466667 | 0.197866667  | 0.0414       |
| SMC3         | -0.026633333 | 0.067033333  | -0.0768      | -0.086433333 |
| MYO1C        | 0.1425       | 0.023266667  | -0.220166667 | -0.0389      |
| LOC645895    | 0.009866667  | 0.0455       | 0.135566667  | 0.005966667  |
| TPMT         | 0.0583       | -0.000333333 | -0.082066667 | 0.003666667  |
| LOC646548    | 0.143133333  | 0.147133333  | -0.038933333 | 0.224        |
| LOC91431     | -0.1019      | 0.094733333  | 0.100133333  | 0.046033333  |
| QRFPR        | -0.071066667 | 0.194433333  | 0.136766667  | 0.024633333  |
| ZNF222       | -0.050666667 | -0.071066667 | -0.053466667 | -0.008566667 |
| STOX1        | -0.058233333 | 0.103466667  | -0.069733333 | 0.1411       |
| TMTC4        | -0.118833333 | -0.034766667 | 0.069        | -0.003333333 |
| LOC100134188 | -0.010733333 | -0.130566667 | 0.072366667  | 0.0325       |
| DCAF16       | 0.201533333  | -0.057233333 | -0.056966667 | 0.113433333  |
| RHOF         | -0.0631      | 0.0143       | -0.037633333 | -0.0531      |
| LOC646841    | -0.425466667 | 0.073533333  | -0.442133333 | -0.400533333 |
| C3orf63      | -0.1467      | -0.1716      | 0.140233333  | -0.009233333 |
| MAGEA12      | 0.046966667  | 0.109233333  | 0.017166667  | 0.0801       |
| WDR46        | 0.015033333  | 0.069866667  | -0.0226      | 0.009866667  |
| CASP2        | 0.010833333  | 0.156433333  | 0.110466667  | 0.1755       |
| MRPS18C      | 0.1111       | 0.0021       | 0.004566667  | 0.064033333  |
| LOC399491    | 0.207433333  | -0.028       | -0.162766667 | -0.0114      |
| RPL37A       | -0.013733333 | 0.0249       | -0.060866667 | 0            |
| MOSPD3       | -0.0905      | -0.091666667 | 0.041766667  | -0.111133333 |
| LOC100132565 | 0.0162       | 0.0851       | -0.119466667 | 0.0255       |
| METTL9       | -0.246166667 | -0.060466667 | 0.3703       | -0.049666667 |
| XPNPEP3      | -0.0689      | 0.045866667  | -0.058633333 | -0.0049      |
| MIOS         | -0.043366667 | 0.0825       | -0.011466667 | -0.0201      |

|              |              |              |              |              |
|--------------|--------------|--------------|--------------|--------------|
| HS6ST2       | -0.003066667 | 0.006766667  | 0.002466667  | 0.026033333  |
| ASNSD1       | 0.051233333  | -0.068133333 | 0.066466667  | 0.169933333  |
| UNC84A       | 0.1069       | -0.0355      | -0.115133333 | 0.0143       |
| SNX3         | 0.011666667  | -0.092466667 | -0.012333333 | 0.061633333  |
| NUP88        | 0.163733333  | 0.1305       | -0.011233333 | 0.182233333  |
| ATAD1        | -0.065       | 0.0371       | 0.043066667  | 0.0604       |
| LOC647346    | -0.031466667 | -0.057366667 | -0.1004      | -0.002566667 |
| PIP3-E       | 0.055866667  | -0.026766667 | -0.1191      | -0.074666667 |
| GOLGA8A      | -0.146166667 | -0.070533333 | -0.054333333 | -0.051733333 |
| INVS         | -0.175033333 | -0.0499      | -0.050933333 | -0.050633333 |
| MED8         | 0.142466667  | -0.0547      | -0.227366667 | -0.0343      |
| CUL9         | 0.068966667  | -0.125766667 | 0.005533333  | 0.167433333  |
| TINAGL1      | 0.018566667  | 0.0077       | 0.044366667  | 0.035433333  |
| HPS3         | -0.106966667 | -0.259733333 | 0.002433333  | -0.152833333 |
| CIR1         | -0.102       | -0.235966667 | -0.2449      | -0.180333333 |
| TNFRSF10A    | 0.016433333  | 0.023433333  | -0.0405      | 0.050933333  |
| LOC646567    | 0.282666667  | -0.015033333 | -0.108566667 | 0.076233333  |
| BCAT2        | -0.029733333 | -0.0466      | 0.0142       | -0.065833333 |
| PI4KA        | -0.077866667 | 0.000733333  | -0.062966667 | 0.088        |
| DNAJC1       | -0.368233333 | -0.0589      | -0.101766667 | -0.223633333 |
| RPL35A       | -0.011466667 | -0.018733333 | 0.0257       | 0.032        |
| DCLRE1B      | 0.071333333  | 0.052566667  | 0.055533333  | 0.074833333  |
| MYO19        | 0.2088       | -0.0255      | 0.050666667  | 0.156766667  |
| WDR76        | -0.007933333 | 0.190266667  | 0.024666667  | 0.1144       |
| CHST1        | -0.072266667 | -0.1122      | 0.0716       | -0.004433333 |
| ZNF75A       | 0.003333333  | -0.036633333 | -0.1226      | 0.0957       |
| STUB1        | 0.019333333  | 0.0558       | -0.083666667 | 0.015766667  |
| OSBPL6       | 0.300633333  | 0.081066667  | -0.136833333 | 0.2336       |
| C10orf75     | -0.021466667 | -0.072466667 | -0.059633333 | 0.058233333  |
| MGC35361     | 0.089333333  | -0.012633333 | -0.043666667 | -0.0132      |
| LOC100129975 | 0.002966667  | -0.005333333 | -0.011933333 | -0.028533333 |
| LOC100129716 | -0.0394      | 0.0176       | -0.059566667 | 0.158166667  |
| POLG2        | 0.067833333  | -3.33E-05    | -0.136233333 | 0.0953       |
| CYB5B        | 0.041633333  | 0.025766667  | 0.084        | 0.100933333  |
| CHCHD4       | 0.0042       | 0.148666667  | 0.1126       | 0.078866667  |
| HEXIM1       | 0.096133333  | -0.089433333 | -0.058233333 | -0.0615      |
| SIL1         | -0.2614      | -0.106766667 | -0.0378      | -0.141466667 |
| UBE2K        | 0.074333333  | 0.061733333  | -0.0838      | 0.051966667  |
| REEP3        | 0.196733333  | -0.027266667 | 0.068        | 0.128233333  |
| C16orf80     | 0.104533333  | 0.215433333  | 0.106566667  | 0.2488       |
| AFG3L1       | 0.104266667  | -0.014       | -0.046733333 | 0.087166667  |
| SLC9A5       | -0.136       | -0.0602      | 0.051166667  | 0.009233333  |
| ACTR1B       | -0.149066667 | -0.074566667 | 0.284066667  | -0.0451      |
| NGFRAP1      | -0.126566667 | -0.0975      | 0.0228       | -0.058766667 |
| LOC650152    | 0.257033333  | 0.0743       | -0.0311      | 0.145766667  |
| BRD8         | -0.0065      | -0.131366667 | -0.051266667 | -0.020133333 |
| KLHL28       | -0.053733333 | 0.269833333  | 0.272833333  | 0.084666667  |

|           |              |              |              |              |
|-----------|--------------|--------------|--------------|--------------|
| LOC648025 | -0.0244      | 0.015366667  | -0.047266667 | -0.0831      |
| RRP7B     | 0.031866667  | -0.090533333 | -0.022833333 | 0.0176       |
| RFX5      | -0.092133333 | -0.1498      | 0.164466667  | -0.072866667 |
| RPS10     | -0.043666667 | -0.051266667 | -0.026633333 | -0.081333333 |
| PTPN11    | 0.0069       | -0.0586      | 0.042266667  | 0.0878       |
| TRPV2     | 0.059733333  | 0.136266667  | 0.2743       | 0.1883       |
| PCBP2     | -0.067566667 | -0.028066667 | -0.149866667 | 0.005333333  |
| MIR761    | 0.004233333  | 0.004        | 0.054033333  | 0.073366667  |
| PHF17     | 0.140033333  | -0.097866667 | -0.104833333 | -0.076833333 |
| QPRT      | -0.472366667 | -0.256733333 | 0.2795       | -0.203633333 |
| ARHGAP4   | -0.065833333 | 0.041366667  | -0.038133333 | -0.087166667 |
| FLNA      | 0.229766667  | -0.093266667 | -0.4188      | -0.030633333 |
| WBSR16    | 0.107566667  | 0.027866667  | 0.028866667  | 0.0195       |
| TULP3     | 0.0332       | -0.025866667 | -0.2491      | -0.042866667 |
| MICALL1   | 0.0017       | 0.1241       | -0.086666667 | 0.043433333  |
| LOC440776 | 0.076933333  | -0.0879      | -0.135433333 | -0.083266667 |
| NDUFB8    | -0.0955      | -0.070666667 | 0.2015       | 0.071        |
| KIF5C     | 0.007        | 0.002833333  | -0.069       | -0.099166667 |
| LCMT2     | 0.0812       | 0.1281       | 0.090166667  | 0.160766667  |
| RAB28     | 0.137033333  | 0.0495       | 0.008566667  | 0.140166667  |
| TBK1      | 0.121333333  | 0.008333333  | -0.1614      | 0.105433333  |
| IRX1      | 0.081033333  | -0.116766667 | -0.184766667 | -0.0542      |
| STK38L    | -0.0602      | -0.0619      | 0.0255       | 0.0757       |
| ZNF45     | 0.003233333  | -0.038866667 | 0.029933333  | 0.087166667  |
| RGPD2     | -0.0099      | 0.0575       | 0.004066667  | -0.0414      |
| SFRS3     | 0.133766667  | -0.044666667 | 0.059766667  | 0.122        |
| ZNF323    | -0.1887      | -0.132066667 | -0.1948      | -0.150733333 |
| CACYBP    | 0.211966667  | 0.089666667  | 0.0318       | 0.0969       |
| SNORD30   | 0.133866667  | 0.105633333  | -0.033066667 | -0.071466667 |
| MRPS25    | -0.182133333 | -0.0875      | -0.057566667 | -0.089666667 |
| LYRM5     | -0.327966667 | -0.27        | -0.021433333 | -0.1744      |
| KIF1C     | -0.0622      | -3.33E-05    | -0.062233333 | -0.102133333 |
| LSM1      | 0.027333333  | 0.075966667  | -0.1017      | 0.035166667  |
| MSC       | -0.844266667 | -1.053966667 | -0.6072      | -0.521433333 |
| LOC642398 | -0.051       | -0.0024      | 0.0322       | -0.056933333 |
| SLC35E3   | 0.0063       | -0.1075      | 0.0923       | 0.114466667  |
| WDFY2     | 0.145766667  | 0.263466667  | 0.123933333  | 0.2037       |
| PRDX3     | 0.038133333  | 0.2088       | 0.0616       | 0.155966667  |
| SIRT6     | 0.037866667  | 0.024866667  | -0.1516      | 0.1369       |
| DOCK6     | -0.133333333 | -0.0416      | -0.0782      | -0.0707      |
| IL21R     | -0.1249      | 0.0588       | -0.001233333 | 0.073966667  |
| CNTNAP1   | -0.167366667 | -0.093833333 | -0.0421      | -0.1316      |
| MED9      | -0.028233333 | -0.032966667 | 0.029966667  | 0.250633333  |
| P15RS     | -0.1733      | 0.069        | 0.001933333  | -0.010233333 |
| SKA2      | -0.0019      | 0.055966667  | 0.176133333  | 0.145033333  |
| HNRNPL    | 0.318066667  | 0.036366667  | -0.077533333 | 0.171366667  |
| HBP1      | -0.389766667 | -0.417933333 | -0.307066667 | -0.385166667 |

|           |              |              |              |              |
|-----------|--------------|--------------|--------------|--------------|
| FGFR1OP2  | 0.0229       | -0.040733333 | 0.052466667  | 0.0104       |
| TOP2B     | -0.028533333 | -0.0164      | -0.0887      | 0.0025       |
| EEA1      | -0.040633333 | 0.037266667  | 0.079066667  | 0.079166667  |
| LSG1      | 0.039533333  | 0.185466667  | -0.0564      | 0.130433333  |
| DPP9      | 0.1271       | -0.0016      | -0.009066667 | 0.027666667  |
| CPN2      | 0.066466667  | -0.060433333 | 0.065833333  | 0.220266667  |
| TRA1P2    | -0.126533333 | 0.033066667  | -0.071633333 | -0.205566667 |
| R3HDM2    | -0.253866667 | -0.0055      | 0.026266667  | -0.1868      |
| ANKIB1    | -0.1443      | -0.039333333 | -0.118366667 | -0.213       |
| POLR2K    | 0.043033333  | -0.0353      | -0.045366667 | 0.0164       |
| CNOT1     | -0.113733333 | -0.045266667 | -0.009366667 | 0.014333333  |
| METT10D   | 0.1796       | 0.1073       | 0.049833333  | 0.1438       |
| RWDD2B    | -0.039166667 | -0.0332      | -0.069566667 | -0.030266667 |
| MAD2L1    | 0.1217       | 0.037466667  | 0.025066667  | 0.022966667  |
| LOC723972 | 0.157266667  | 0.051466667  | 0.014333333  | 0.076066667  |
| TCP10L    | -0.039033333 | -0.013366667 | 0.0634       | -0.008466667 |
| FIGNL1    | 0.0001       | 0.052233333  | 0.124933333  | 0.118933333  |
| ZNF211    | -0.0958      | -0.1241      | -0.094633333 | 0.050666667  |
| MGRN1     | 0.0287       | -0.050066667 | -0.001       | 0.072133333  |
| CYB5D2    | -0.434733333 | -0.290533333 | -0.120666667 | -0.305633333 |
| C3orf17   | -0.014133333 | -0.0975      | -0.086733333 | -0.146933333 |
| LOC643176 | -0.102933333 | 0.1559       | -0.075866667 | 0.024666667  |
| ANKRD44   | -0.0362      | 0.163633333  | 0.011433333  | -0.088166667 |
| MUC1      | -0.0355      | -0.037566667 | -0.0185      | 0.001866667  |
| ZNF385A   | -0.054733333 | 0.0913       | 0.034666667  | 0.002133333  |
| KBTBD7    | -0.1448      | -0.119866667 | -0.034733333 | -0.077766667 |
| LOC644172 | -0.1399      | -0.0222      | -0.148733333 | -0.2478      |
| NCKAP1    | 0.092066667  | -0.102633333 | -0.0739      | -0.095966667 |
| SNORD99   | 0.045366667  | -0.0819      | 0.186333333  | 0.148733333  |
| GYS1      | 0.0556       | -0.045633333 | 0.014433333  | 0.009933333  |
| SLC35D2   | -0.128633333 | -0.018266667 | -0.0354      | -0.002       |
| NSUN6     | -0.0686      | -0.0243      | 0.123333333  | -0.043966667 |
| GSTTP2    | -0.072066667 | 0.068666667  | 0.191566667  | -0.132433333 |
| LOC652672 | 0.0127       | -0.1858      | -0.051933333 | -0.000866667 |
| UBE2C     | 0.312233333  | 0.097066667  | -0.0915      | 0.1509       |
| LOC391656 | -0.132933333 | 0.0361       | -0.2211      | -0.084766667 |
| ANKRD34A  | -0.027866667 | 0.027066667  | 0.112633333  | 0.024766667  |
| PPP1R12B  | 0.121566667  | 0.017733333  | 0.178733333  | 0.2205       |
| POLR2J4   | 0.009666667  | -0.047566667 | 0.1465       | -0.027       |
| LOC730255 | -0.126933333 | -0.0395      | -0.171466667 | -0.194366667 |
| 10-Sep    | 0.1315       | -0.028166667 | 0.022866667  | 0.039066667  |
| WDR5B     | -0.196166667 | -0.161233333 | -0.081466667 | -0.062266667 |
| LOC653583 | 0.001233333  | 0.030066667  | -0.216166667 | -0.061266667 |
| PIF1      | 0.157933333  | -0.0332      | -0.141833333 | -0.017633333 |
| LOC731878 | 0.1709       | 0.184733333  | -0.0313      | 0.210333333  |
| PDCD10    | 0.232666667  | 0.066933333  | -0.101433333 | 0.169933333  |
| ZNF275    | 0.133333333  | 0.1012       | -0.002966667 | 0.0532       |



|              |              |              |              |              |
|--------------|--------------|--------------|--------------|--------------|
| ZNF821       | -0.108833333 | -0.020566667 | -0.022066667 | -0.136533333 |
| MMS19L       | -0.013166667 | -0.018466667 | 0.0115       | -0.0278      |
| UTP6         | 0.2267       | 0.094466667  | 0.0641       | 0.152133333  |
| EXOSC6       | 0.045133333  | 0.137166667  | -0.129666667 | 0.106333333  |
| JMJD8        | -0.097233333 | -0.181833333 | -0.043333333 | -0.139266667 |
| LOC100133591 | 0.392366667  | 0.1474       | -0.008033333 | 0.3073       |
| LOC146517    | 0.087966667  | -0.123066667 | -0.063133333 | 0.045366667  |
| WASH3P       | -0.1023      | -0.044133333 | -0.081033333 | -0.046666667 |
| FBXW7        | 0.1235       | 0.068733333  | 0.049566667  | -0.040766667 |
| LOC100133058 | -0.310066667 | -0.1121      | -0.011166667 | -0.135033333 |
| C9orf75      | 0.018066667  | -0.102466667 | -0.156266667 | 0.019866667  |
| GNG4         | 0.0037       | 0.017966667  | 0.0254       | 0.042833333  |
| C15orf17     | -0.117366667 | -0.197133333 | -0.055166667 | -0.163433333 |
| FAM39E       | -0.126966667 | -0.1896      | -0.044766667 | -0.105566667 |
| ELOVL4       | -0.0572      | -0.161233333 | 0.052133333  | -0.024666667 |
| ITSN1        | 0.031733333  | 0.090833333  | -0.0039      | 0.074833333  |
| NEK2         | 0.182666667  | 0.0321       | -0.068033333 | 0.051233333  |
| PABPC4       | -0.1351      | -0.002433333 | -0.114       | -0.0362      |
| LOC643624    | -0.0223      | -0.055766667 | 0.083433333  | 0.0275       |
| PSAP         | -0.144733333 | -0.202766667 | -0.180666667 | -0.1811      |
| FAM103A1     | 0.174833333  | 0.039533333  | 0.163566667  | 0.195866667  |
| PHCA         | -0.007433333 | 0.044733333  | 0.062133333  | 0.0689       |
| LOC100130224 | 0.1587       | 0.0352       | 0.161933333  | 0.308566667  |
| TMEM180      | -0.154466667 | -0.0281      | -0.141833333 | -0.215633333 |
| AHDC1        | 0.219766667  | 0.040266667  | -0.075933333 | 0.0721       |
| C12orf77     | 0.1773       | -0.201433333 | -0.005933333 | 0.015333333  |
| LOC653113    | 0.003733333  | 0.073866667  | -0.039633333 | 0.162233333  |
| DTX2         | 0.1607       | 0.048        | 0.062366667  | 0.1124       |
| ARFGAP2      | -0.105133333 | -0.092233333 | 0.048533333  | 0.0287       |
| TMEM198      | 0.006466667  | -0.043933333 | -0.367433333 | -0.034433333 |
| DDX51        | -0.062766667 | 0.2657       | 0.2736       | 0.064266667  |
| CRLS1        | 0.109533333  | 0.035733333  | -0.057666667 | 0.0377       |
| IRF9         | -0.108766667 | -0.3455      | -0.1338      | -0.101       |
| ZNF268       | 0.023766667  | -0.0046      | -0.082333333 | -0.087166667 |
| SACS         | 0.175566667  | 0.266833333  | 0.2258       | 0.162666667  |
| LOC645233    | 0.154        | 0.260466667  | 0.123733333  | 0.1491       |
| LOC100134468 | 0.006433333  | -0.002366667 | -0.178766667 | -0.051533333 |
| BRCA1        | -0.047       | 0.060766667  | 0.2459       | 0.133        |
| KIF22        | 0.124533333  | -0.0165      | -0.015566667 | 0.1259       |
| ZNF613       | -0.1089      | -0.019933333 | -0.103366667 | -0.057133333 |
| RGS19        | -0.0343      | 0.0942       | 0.022566667  | -0.058933333 |
| HARS2        | 0.017633333  | -0.006466667 | -0.0605      | 0.093033333  |
| SHROOM3      | 0.049966667  | 0.0039       | 0.0682       | 0.055666667  |
| TAOK2        | 0.1279       | 0.022833333  | -0.014033333 | 0.189333333  |
| LOC100132673 | -0.474366667 | 0.031733333  | -0.236566667 | -0.257266667 |
| KTELC1       | -0.1875      | 0.044466667  | -0.070533333 | -0.072766667 |
| LOC401233    | 0.0458       | 0.073966667  | -0.122133333 | 0.043166667  |

|              |              |              |              |              |
|--------------|--------------|--------------|--------------|--------------|
| PLEKHG4      | -0.181033333 | -0.105233333 | -0.0529      | -0.0969      |
| AP1GBP1      | -0.058433333 | -0.106333333 | -0.0879      | -0.0022      |
| RAB40C       | -0.035466667 | -0.1735      | -0.216233333 | 0.021133333  |
| LOC257396    | 0.083466667  | -0.038166667 | 0.091133333  | 0.010533333  |
| ZNF716       | -0.117633333 | -0.014733333 | -0.006233333 | -0.044433333 |
| LOC402677    | -0.3977      | 0.1049       | -0.404733333 | -0.3414      |
| CNBP         | -0.073266667 | 0.012766667  | -0.1234      | -0.026233333 |
| LOC730496    | 0.004066667  | -0.040633333 | -0.097466667 | -0.035633333 |
| MINA         | 0.093133333  | -0.009233333 | 0.014266667  | 0.0272       |
| LOC650739    | -0.2965      | -0.016033333 | -0.349766667 | -0.274833333 |
| LOC338870    | -0.1777      | -0.115033333 | 0.003733333  | -0.042766667 |
| SDHC         | -0.157266667 | -0.2183      | 0.0536       | -0.1136      |
| DCTN2        | -0.067033333 | -0.053466667 | -0.198033333 | 0.029333333  |
| HNRPA1P4     | 0.230633333  | -0.012533333 | 0.100133333  | 0.143466667  |
| LOC389895    | -0.1154      | 0.109066667  | -0.052033333 | -0.0504      |
| ZNF250       | -0.066533333 | -0.054933333 | -0.081966667 | -0.007966667 |
| C22orf40     | -0.086366667 | -0.101966667 | 0.005866667  | -0.176166667 |
| LOC387930    | -0.0144      | 0.007333333  | 0.0086       | 0.051        |
| LOC25845     | -0.153033333 | -0.125733333 | -0.0845      | -0.1068      |
| LOC392713    | -0.064166667 | -0.046933333 | -0.0176      | -0.0861      |
| 6-Mar        | 0.052433333  | -0.1067      | 0.0642       | 0.048866667  |
| SHMT2        | -0.2957      | -0.2099      | -0.262666667 | -0.261233333 |
| STAT2        | -0.5525      | -0.297233333 | -0.029433333 | -0.325733333 |
| FAM160B2     | -0.067166667 | -0.093566667 | -0.052733333 | -0.100966667 |
| MYCBP        | 0.164566667  | 0.151566667  | 0.045933333  | 0.1563       |
| IFT52        | -0.154333333 | -0.067366667 | -0.128       | -0.125366667 |
| CCDC90A      | 0.1224       | -0.049       | -0.0156      | 0.085466667  |
| SUSD2        | 0.029366667  | -0.066266667 | -0.025266667 | -0.018633333 |
| LOC440027    | -0.0619      | 0.026266667  | 0.020533333  | -0.006666667 |
| C15orf21     | -0.072666667 | 0.133466667  | -0.229666667 | -0.160366667 |
| ZBTB40       | -0.0347      | -0.0306      | 0.130733333  | 0.113266667  |
| NUP107       | 0.1878       | 0.079766667  | 0.039766667  | 0.097066667  |
| LOC100128476 | 0.0062       | 0.029166667  | -0.004466667 | -0.041833333 |
| MED4         | 0.090433333  | 0.0414       | 0.022366667  | 0.0993       |
| LOC440575    | -0.0562      | 0.022233333  | -0.050233333 | 0.0535       |
| KIAA0892     | -0.062033333 | -0.08        | -0.0933      | -0.023433333 |
| GPR89A       | 0.036066667  | -0.119733333 | 0.066366667  | -0.056433333 |
| CIAPIN1      | 0.123633333  | 0.078166667  | -0.031866667 | 0.170066667  |
| COX7C        | -0.028566667 | -0.072566667 | 0.043466667  | -0.038533333 |
| LOC645385    | 0.152366667  | -0.117366667 | 0.0196       | -0.053       |
| LOC729279    | -0.1198      | -0.154066667 | -0.1116      | -0.1005      |
| C8orf59      | -0.014366667 | 0.099266667  | -0.0919      | 0.0158       |
| PARG         | 0.019733333  | -0.0518      | -0.0896      | -0.118666667 |
| CNN3         | 0.510166667  | 0.239333333  | -0.039366667 | 0.2902       |
| UHMK1        | 0.005266667  | 0.242733333  | 0.0935       | 0.0192       |
| MIR130A      | 0.000833333  | 0.132966667  | 0.022333333  | 0.058633333  |
| LOC100129539 | 0.106333333  | 0.016333333  | 0.140033333  | 0.1358       |

|              |              |              |              |              |
|--------------|--------------|--------------|--------------|--------------|
| ZNF653       | 0.072466667  | -0.103233333 | -0.0348      | 0.040433333  |
| KIF24        | -0.061866667 | 0.160466667  | 0.074666667  | 0.1509       |
| DOCK3        | -0.0577      | -0.0506      | 0.056633333  | 0.068666667  |
| SNORD43      | -0.013266667 | 0.115466667  | -0.027433333 | 0.023966667  |
| CXorf38      | 0.0706       | 0.259        | 0.1382       | 0.1479       |
| KRTAP10-11   | -0.038333333 | -0.1767      | -0.0492      | -0.081066667 |
| PRRX1        | 0.019966667  | -0.021933333 | 0.005033333  | -0.003533333 |
| MKRN1        | -0.2558      | -0.234433333 | -0.061966667 | -0.0924      |
| SNORD33      | 0.0433       | -0.014066667 | 0.062433333  | 0.111833333  |
| HLA-A29.1    | 0.136633333  | -0.0478      | 0.0705       | 0.0902       |
| PRKCH        | 0.043233333  | -0.0171      | 0.120033333  | -0.115566667 |
| LOC100129882 | -0.1664      | -0.262       | 0.408766667  | -0.026966667 |
| ZKSCAN3      | -0.0241      | 0.004933333  | 0.022533333  | 0.0833       |
| LOC644937    | -0.4011      | -0.091066667 | -0.321533333 | -0.2726      |
| GDA          | -0.013633333 | -0.033533333 | 0.061233333  | 0.039133333  |
| MIR129-2     | -0.035333333 | -0.158733333 | 0.032        | 0.031933333  |
| PGGT1B       | 0.102233333  | 0.028        | 0.1259       | 0.125866667  |
| FAM109A      | -0.019666667 | -0.0841      | 0.068366667  | -0.100966667 |
| S100A4       | -0.086033333 | 0.102366667  | 0.034533333  | 0.0959       |
| TGIF1        | 0.223733333  | -0.083766667 | -0.1089      | 0.144466667  |
| RRS1         | 0.3668       | 0.3473       | 0.1536       | 0.388366667  |
| LOC653489    | -0.112566667 | 0.0043       | 0.014433333  | -0.2191      |
| LOC100131718 | -0.096433333 | 0.212433333  | 0.094633333  | -0.1684      |
| CD33         | -0.038733333 | 0.005666667  | -0.057366667 | -0.089933333 |
| C3orf54      | 0.132766667  | -0.153466667 | -0.167066667 | -0.0197      |
| RBMS2P       | 0.034766667  | 0.080866667  | -0.0251      | 0.0824       |
| LOC100132863 | 0.2065       | 0.2536       | -0.2197      | 0.022033333  |
| PAGE1        | -0.0068      | 0.000366667  | 0.095133333  | 0.0574       |
| ASTN2        | -0.143133333 | 0.0054       | -0.0956      | -0.121966667 |
| NUP153       | 0.286266667  | 0.1899       | 0.045133333  | 0.1578       |
| C1orf71      | 0.138366667  | 0.139233333  | 0.156833333  | 0.150533333  |
| THAP1        | -0.033633333 | 0.115233333  | -0.065133333 | -0.052233333 |
| LOC641298    | 0.285233333  | -0.197333333 | -0.0772      | 0.0827       |
| LOC148430    | -0.2969      | -0.280733333 | 0.088333333  | 0.0038       |
| LOC645722    | 0.131166667  | -0.113       | 0.0357       | -0.026533333 |
| LOC728275    | 0.1683       | -0.068066667 | 0.127733333  | 0.1168       |
| EYA3         | 0.1515       | -0.005566667 | 0.244966667  | 0.130133333  |
| SENP8        | -0.2101      | 0.094833333  | -0.064833333 | -0.0249      |
| C14orf32     | 0.0775       | 0.016366667  | 0.143266667  | 0.1289       |
| MPHOSPH10    | 0.018166667  | 0.098866667  | -0.165166667 | -0.032166667 |
| RNY3         | -0.072433333 | -0.0164      | 0.054366667  | -0.186433333 |
| ENO1         | -0.012066667 | 0.053566667  | -0.028533333 | -0.0161      |
| LSM8         | -0.068033333 | -0.080366667 | -0.026333333 | 0.011033333  |
| SF4          | -0.022866667 | 0.017        | 0.020466667  | 0.034133333  |
| XAGE1A       | -0.0295      | 0.022933333  | -0.0116      | 0.0127       |
| LOC390557    | 0.095166667  | 0.172966667  | -0.155166667 | -0.122066667 |
| ARAF         | -0.084633333 | -0.0737      | -0.002366667 | -0.0212      |

|              |              |              |              |              |
|--------------|--------------|--------------|--------------|--------------|
| FOXJ2        | 0.099666667  | -0.2068      | -0.184766667 | -0.034233333 |
| DSN1         | 0.078066667  | 0.2287       | -0.1384      | 0.064        |
| CCDC23       | 0.0013       | -0.047266667 | -0.1592      | -0.014066667 |
| LOC100129158 | -0.0084      | 0.030833333  | -0.003733333 | 0.007066667  |
| LTBP4        | -0.1872      | -0.158966667 | -0.166966667 | -0.1206      |
| LOC652458    | -0.028533333 | 0.037266667  | -0.072566667 | -0.059333333 |
| PPP2R3A      | -0.0035      | 0.117366667  | -0.1218      | 0.023566667  |
| TAOK3        | -0.004066667 | -0.067033333 | -0.089833333 | 0.008666667  |
| TMCO1        | -0.054866667 | 0.0829       | -0.017966667 | -0.021533333 |
| WISP3        | -0.034066667 | 0.023466667  | 0.011966667  | -0.024066667 |
| ZNF419       | -0.164833333 | -0.271933333 | -0.157433333 | -0.126633333 |
| LOC441032    | -0.255233333 | -0.000866667 | -0.189033333 | -0.219766667 |
| BAGE         | 0.052833333  | -0.025633333 | -0.012933333 | -0.016233333 |
| EXOC3        | -0.1054      | -0.0213      | -0.054766667 | -0.093733333 |
| HDAC9        | 0.270033333  | -0.030466667 | -0.103       | 0.203633333  |
| C8orf41      | 0.045566667  | 0.039966667  | 0.024133333  | 0.024366667  |
| URB2         | 0.098833333  | 0.139766667  | 0.097433333  | 0.145466667  |
| LOC100132717 | -0.066866667 | -0.1512      | -0.009933333 | -0.0398      |
| FAM46B       | 0.0017       | -0.016066667 | 0.004633333  | -0.043733333 |
| DEXI         | -0.172433333 | -0.2471      | 0.019733333  | -0.1732      |
| STARD5       | -0.442266667 | -0.4503      | -0.181666667 | -0.3547      |
| C1orf9       | 0.005233333  | 0.158        | 0.000566667  | 0.086733333  |
| NBPF1        | 0.064566667  | -0.037533333 | 0.0789       | -0.0823      |
| LOC100128309 | -0.048633333 | 0.049533333  | -0.015866667 | 0.064866667  |
| TEX261       | -0.0755      | -0.0591      | 0.0512       | -0.055033333 |
| ZNF383       | -0.0925      | 0.063666667  | -0.020066667 | 0.017466667  |
| NEO1         | 0.002133333  | -0.269033333 | -0.0947      | -0.119333333 |
| LOC641798    | 0.020766667  | -0.0533      | 0.094766667  | 0.046166667  |
| FLJ20273     | -0.1076      | 0.033833333  | 0.113966667  | -0.102966667 |
| RPL23AP53    | -0.0796      | -0.032433333 | -0.022733333 | 0.098066667  |
| RPS28        | -0.2452      | -0.0481      | -0.118033333 | -0.282833333 |
| LOC642502    | -0.0474      | -0.047033333 | -0.073533333 | -0.129333333 |
| LOC645018    | -0.4405      | 0.0145       | -0.531666667 | -0.508733333 |
| ZNF812       | 0.0183       | 0.0104       | 0.016633333  | 0.0742       |
| TCEAL8       | -0.230466667 | -0.1187      | -0.111366667 | -0.140966667 |
| LOC728965    | 0.0955       | -0.0019      | 0.101666667  | 0.088633333  |
| MGC26356     | 0.011866667  | 0.158166667  | 0.250966667  | 0.046433333  |
| ASNA1        | -0.111766667 | 0.162733333  | 0.067466667  | 0.078866667  |
| TARSL2       | -0.063333333 | -0.023066667 | -0.034566667 | -0.131633333 |
| CCDC106      | -0.205366667 | -0.189566667 | 0.017033333  | -0.183666667 |
| CYorf15A     | 0.069466667  | 0.208733333  | 0.1157       | -0.159233333 |
| EPB41L4A     | 0.0239       | -0.140333333 | 0.010633333  | 0.023533333  |
| FCHO2        | 0.198733333  | 0.0296       | -0.0913      | 0.0884       |
| LOC100130422 | -0.2555      | -0.1292      | 0.108133333  | -0.084433333 |
| APH1B        | -0.220466667 | -0.001266667 | 0.070933333  | -0.219566667 |
| FANCD2       | -0.054033333 | 0.076766667  | 0.134166667  | -0.1246      |
| MANBA        | -0.355866667 | -0.172866667 | 0.067        | -0.1816      |

|            |              |              |              |              |
|------------|--------------|--------------|--------------|--------------|
| RPPH1      | 0.042533333  | 0.258966667  | 0.115333333  | 0.119066667  |
| PSMD6      | 0.178233333  | 0.015933333  | -0.0093      | 0.098133333  |
| SH2D1A     | -0.0867      | -0.006133333 | 0.072        | 0.001633333  |
| ADM2       | -0.3841      | -0.483466667 | -0.614833333 | -0.4697      |
| LMO2       | 0.0269       | -0.0497      | -0.0292      | 0.046933333  |
| LOC729742  | -0.0627      | -0.118966667 | -0.094133333 | -0.1352      |
| GSDMB      | -0.084466667 | -0.124633333 | 0.195933333  | -0.070666667 |
| FBXL11     | 0.191266667  | -0.0063      | 0.035266667  | 0.103266667  |
| ACVR1B     | 0.101966667  | -0.161733333 | 0.004033333  | 0.0933       |
| MRPL55     | 0.064133333  | -0.0218      | 0.0081       | 0.014666667  |
| SLITRK5    | -0.012866667 | -0.075366667 | 0.078366667  | -0.005433333 |
| UBE3C      | -0.036133333 | 0.275466667  | 0.089433333  | 0.152133333  |
| RNF141     | -0.162233333 | -0.288233333 | 0.102533333  | -0.0638      |
| C20orf52   | -0.0995      | 0.076333333  | 0.0152       | -0.0412      |
| RMI1       | 0.054866667  | 0.161966667  | 0.099133333  | 0.124433333  |
| NCRNA00153 | -0.280766667 | -0.1638      | -0.264833333 | -0.343433333 |
| FAM125B    | -0.069933333 | -0.000466667 | -0.004833333 | 0.032833333  |
| LOC729355  | 0.030966667  | -0.109633333 | 0.060933333  | -0.007233333 |
| SP1        | 0.027        | -0.063066667 | 0.0057       | -0.0451      |
| RPL18      | 0.092933333  | -0.052633333 | -0.008333333 | 0.008933333  |
| CHML       | -0.020333333 | 0.157066667  | 0.0301       | -0.031033333 |
| DLEU1      | -0.057533333 | 0.222233333  | 0.11         | 0.032033333  |
| MLF2       | 0.216933333  | 0.0139       | -0.1411      | -0.008866667 |
| NDN        | -0.136233333 | -0.070166667 | -0.020166667 | -0.092       |
| SETX       | 0.010666667  | -0.010466667 | -0.003766667 | 0.0142       |
| ASNS       | -0.224966667 | -0.520633333 | -0.5426      | -0.287666667 |
| C20orf11   | -0.042366667 | -0.007733333 | -0.2154      | -0.061033333 |
| TBL1XR1    | 0.2845       | -0.1836      | -0.0526      | -0.011233333 |
| CENPK      | 0.1779       | 0.040066667  | 0.1473       | 0.163433333  |
| PSMD1      | 0.0935       | 0.021766667  | 0.0068       | 0.095        |
| UBE2CBP    | -0.054666667 | 0.003933333  | 0.049633333  | -0.008066667 |
| PSMG2      | 0.058333333  | -0.007033333 | -0.0707      | 0.104266667  |
| IDE        | 0.124633333  | -0.042133333 | -0.051966667 | 0.0728       |
| EIF3C      | -0.015966667 | -0.0876      | -0.122033333 | -0.1039      |
| ROMO1      | -0.058433333 | 0.0887       | -0.063066667 | -0.068433333 |
| DCTN6      | 0.023833333  | 0.133933333  | -0.011866667 | 0.0239       |
| NECAP1     | 0.0552       | 0.0067       | 0.109933333  | 0.1165       |
| KIAA1600   | 0.1642       | -0.0623      | -0.141366667 | -0.0119      |
| AASDH      | -0.1726      | -0.1014      | -0.046       | -0.086766667 |
| FAS        | 0.094666667  | 0.004466667  | -0.137833333 | -0.045166667 |
| LOC644544  | 0.0148       | -0.001366667 | 0.1667       | 0.0838       |
| ATXN7L3    | 0.118766667  | 0.020266667  | -0.0653      | 0.135933333  |
| KRIT1      | -0.3576      | -0.173933333 | 0.0507       | -0.0954      |
| CSAG3      | -0.028266667 | -0.264466667 | 0.020833333  | 0.027633333  |
| RAG1AP1    | -0.4077      | -0.095633333 | -0.052366667 | -0.296933333 |
| S100A14    | 0.214266667  | -0.0155      | 0.005266667  | 0.254866667  |
| MAGEA9B    | 0.148966667  | -0.061566667 | 0.129166667  | 0.217133333  |

|              |              |              |              |              |
|--------------|--------------|--------------|--------------|--------------|
| TMEM39B      | 0.300233333  | 0.023133333  | -0.064466667 | 0.0361       |
| ZNF549       | 0.010066667  | 0.194133333  | 0.1958       | 0.001133333  |
| DNAJB5       | 0.089133333  | -0.069533333 | -0.102566667 | -0.1197      |
| FLJ10081     | -0.155133333 | -0.104       | -0.115133333 | -0.134       |
| LOC642661    | 0.192166667  | 0.128366667  | 0.0721       | 0.201966667  |
| LOC100131905 | -0.0153      | -0.144433333 | -0.1731      | -0.067066667 |
| INPP5K       | -0.160433333 | -0.0674      | -0.0362      | 0.0448       |
| ZFYVE19      | -0.160733333 | -0.048366667 | -0.0797      | -0.0889      |
| DUSP11       | 0.090466667  | -0.0037      | -0.159666667 | 0.042333333  |
| SELM         | -0.039133333 | -0.0561      | 0.042733333  | -0.044533333 |
| NAG18        | 0.002033333  | 0.078633333  | -0.0731      | 0.024266667  |
| LOC644589    | -0.052033333 | -0.0034      | 0.0853       | -0.038333333 |
| AVPR2        | 0.009666667  | -0.022166667 | -0.053233333 | 0.023633333  |
| C1orf106     | -0.0639      | 0.026233333  | -0.002866667 | -0.114533333 |
| LOC646821    | 0.0958       | 0.081866667  | -0.222833333 | 0.013833333  |
| RNF160       | 0.084733333  | -0.029233333 | -0.090133333 | 0.0146       |
| LOC731779    | -0.072533333 | -0.080266667 | 0.063966667  | -0.1413      |
| MAX          | -0.057033333 | 0.070133333  | 0.013433333  | 0.079266667  |
| RAB3GAP1     | 0.023633333  | -0.093666667 | -0.137133333 | -0.094233333 |
| LOC439992    | -0.438133333 | 0.158133333  | -0.398166667 | -0.401933333 |
| LOC100133756 | -0.012366667 | 0.0198       | -0.000166667 | 0.0197       |
| TNRC6B       | -0.055633333 | -0.093466667 | -0.049666667 | -0.167133333 |
| GTF3C4       | 0.139733333  | 0.171966667  | 0.008833333  | 0.1085       |
| GLS          | -0.148366667 | -0.061666667 | -0.066566667 | -0.0658      |
| PPP2R5D      | -0.012566667 | 0.058933333  | -0.010333333 | 0.023866667  |
| C3orf70      | -0.042266667 | 0.209366667  | -0.006766667 | 0.073133333  |
| CTBP2        | 0.121        | 0.004966667  | 0.025966667  | 0.091866667  |
| ATXN7L2      | -0.053566667 | -0.005666667 | -0.049133333 | 0.036233333  |
| PCDH17       | 0.005133333  | -0.047966667 | 0.019333333  | -0.0092      |
| PRKCQ        | -0.0422      | 0.001733333  | -0.027733333 | -0.0627      |
| ENDOG        | 0.0505       | -0.052033333 | -0.0035      | 0.073633333  |
| RWDD1        | -0.090333333 | 0.000766667  | 0.112133333  | 0.002433333  |
| RPAP3        | 0.076        | 0.065366667  | -0.0117      | 0.0289       |
| MRLC2        | 0.268766667  | 0.175866667  | -0.233566667 | 0.129166667  |
| DDX54        | 0.0295       | 0.0831       | -0.0291      | 0.0142       |
| TRIM27       | 0.2154       | 0.1691       | -0.006       | 0.2319       |
| C19orf53     | 0.083666667  | 0.0474       | 0.016166667  | 0.0479       |
| NDRG4        | -0.0263      | -0.062533333 | 0.031033333  | -0.0286      |
| LOC731231    | 0.0941       | -0.076933333 | 0.0774       | 0.096166667  |
| LOC731542    | -0.184       | 0.131566667  | 0.1448       | -0.026766667 |
| TARBP1       | -0.1493      | -0.003333333 | 0.0355       | -0.136666667 |
| MED25        | -0.0623      | 0.021666667  | 0.0535       | 0.0865       |
| LOC653314    | 0.006933333  | -0.242233333 | 0.081533333  | 0.043033333  |
| TFAM         | 0.085466667  | 0.151233333  | 0.16         | 0.2216       |
| LOC728723    | -0.0922      | -0.1309      | -0.084266667 | -0.117833333 |
| ME3          | -0.026133333 | 0.011766667  | -0.044533333 | 0.005133333  |
| ITGA6        | 0.206466667  | 0.343766667  | 0.065233333  | 0.103466667  |

|              |              |              |              |              |
|--------------|--------------|--------------|--------------|--------------|
| ITM2A        | -0.046333333 | 0.032833333  | -0.017033333 | -0.0434      |
| LOC652736    | -0.1124      | 0.026966667  | 0.028466667  | 0.044133333  |
| LOC729667    | -0.015533333 | 0.006433333  | 0.1359       | 0.084        |
| ANXA2P2      | -0.031966667 | 0.022766667  | 0.002266667  | -0.007766667 |
| WDR22        | -0.034366667 | -0.098366667 | -0.000666667 | -0.142533333 |
| CTNNA1       | 0.1459       | 0.0448       | -0.129533333 | 0.071933333  |
| LOC644338    | -0.2476      | 0.066366667  | -0.506866667 | -0.3691      |
| TRIM73       | -0.006366667 | -0.008933333 | -0.117233333 | 0.017        |
| FAM127A      | -0.0403      | -0.161133333 | -0.158533333 | -0.1775      |
| CDK4         | -0.2129      | -0.0581      | 0.0163       | 0.007766667  |
| JAK1         | -0.0278      | -0.137733333 | -0.024533333 | -0.043833333 |
| SSU72        | -0.0567      | -0.020366667 | -0.067       | -0.096066667 |
| LOC646784    | -0.6571      | 0.095633333  | -0.693033333 | -0.767333333 |
| PTS          | 0.312966667  | 0.2441       | -0.0067      | 0.079033333  |
| FRS3         | -0.117866667 | -0.0391      | -0.009433333 | 0.020866667  |
| DENND4B      | -0.079       | 0.020666667  | -0.0541      | -0.047933333 |
| HBE1         | -0.001066667 | -0.016333333 | 0.000866667  | -0.019666667 |
| MGC57346     | 0.1031       | 0.099933333  | 0.038033333  | 0.0812       |
| ATAD2B       | 0.2461       | -0.0951      | 0.070933333  | 0.006866667  |
| PEX5         | -0.174166667 | -0.1568      | 0.135933333  | -0.060333333 |
| LOC388076    | -0.201333333 | -0.0212      | -0.152866667 | -0.129033333 |
| C19orf33     | -0.0351      | 0.076033333  | -0.049366667 | -0.0429      |
| ELOF1        | 0.107333333  | -0.070866667 | 0.095466667  | 0.133166667  |
| CCNB1        | 0.274933333  | 0.206866667  | 0.085066667  | 0.061266667  |
| LOC652455    | -0.1317      | -0.024066667 | -0.071       | -0.203966667 |
| GTF2E1       | 0.287933333  | -0.039833333 | -0.000566667 | 0.219833333  |
| COPZ2        | -0.233566667 | -0.0144      | -0.0537      | -0.029166667 |
| TP53I13      | -0.2496      | 0.0428       | 0.0617       | 0.0298       |
| NKX2-5       | 0.0522       | 0.006566667  | -0.017133333 | -0.0322      |
| RN7SL1       | -0.046466667 | 0.027333333  | 0.028933333  | 0.0597       |
| LOC100133177 | -0.104766667 | 0.0944       | 0.091266667  | -0.0556      |
| C13orf23     | 0.0117       | -0.059266667 | 0.1182       | 0.058733333  |
| GDAP2        | -0.020233333 | 0.218233333  | 0.0538       | 0.035966667  |
| SHCBP1       | 0.043966667  | 0.219233333  | -0.157033333 | -0.063533333 |
| C15orf39     | 0.2112       | 0.097        | -0.077       | 0.159666667  |
| C13orf37     | 0.275066667  | 0.082033333  | 0.034        | 0.024933333  |
| CCDC41       | -0.0158      | 0.120066667  | 0.049233333  | -0.1096      |
| NSMCE4A      | 0.021533333  | 0.170333333  | 0.021133333  | 0.070966667  |
| RASAL3       | 0.0006       | 0.063266667  | 0.2931       | 0.360433333  |
| C19orf52     | 0.110966667  | -0.0229      | -0.0339      | 0.0227       |
| LOC648742    | -0.060633333 | -0.033966667 | -0.064733333 | -0.1686      |
| CNOT4        | 0.077733333  | 0.046066667  | 0.0934       | 0.0647       |
| PPP1R14A     | -0.1456      | 0.097766667  | -0.006933333 | -0.0458      |
| PTPLAD1      | -0.106966667 | 0.083833333  | -0.0563      | -0.133233333 |
| NUDT5        | 0.0314       | 0.017466667  | 0.021566667  | 0.047633333  |
| U1SNRNPBP    | -0.016666667 | -0.087033333 | 0.173666667  | 0.035766667  |
| ATPAF2       | 0.000866667  | 0.0578       | -0.096866667 | -0.0054      |

|              |              |              |              |              |
|--------------|--------------|--------------|--------------|--------------|
| NOX4         | -0.027966667 | 0.012533333  | -0.061166667 | -0.028933333 |
| LOC100130291 | -0.246233333 | -0.032533333 | -0.2898      | -0.231233333 |
| SAAL1        | -0.0271      | 0.0767       | 0.230266667  | 0.102366667  |
| ZNF296       | 0.179533333  | -0.045466667 | -0.012666667 | 0.0281       |
| CDK8         | 0.185533333  | 0.041933333  | -0.017533333 | 0.0454       |
| POT1         | -0.161533333 | -0.0851      | -0.072733333 | -0.186133333 |
| MYNN         | -0.001466667 | -0.159133333 | -0.033433333 | 0.048133333  |
| MIR98        | 0.0705       | -0.018133333 | 0.031733333  | 0.1136       |
| ACOX3        | 0.055966667  | -0.023733333 | -0.010733333 | 0.060566667  |
| MTMR12       | -0.0636      | 0.0339       | -0.0356      | -0.033166667 |
| RPL11        | 0.004133333  | 0.0905       | 0.009333333  | -0.013166667 |
| LOC100133931 | -0.007466667 | -0.004466667 | -0.032933333 | -0.003366667 |
| RPL31P10     | -0.5819      | 0.182933333  | -0.5138      | -0.557466667 |
| C6orf64      | -0.143466667 | 0.009        | -0.101833333 | 0.0054       |
| SMYD4        | -0.049266667 | 0.005033333  | 0.040733333  | -0.086266667 |
| RPAIN        | -0.0932      | -0.068666667 | -0.0449      | -0.184866667 |
| LOC644640    | 0.025266667  | 0.039166667  | 0.070466667  | 0.150766667  |
| LOC100131578 | -0.131233333 | -0.0287      | -0.064166667 | -0.154566667 |
| LOC729603    | -0.018066667 | 0.135933333  | 0.091933333  | -0.042333333 |
| LOC643977    | 0.008733333  | -0.010833333 | 0.015        | -0.026233333 |
| MRPL20       | 0.2069       | 0.094833333  | 0.095433333  | 0.186333333  |
| LOC100128460 | -0.2552      | 0.191266667  | -0.119433333 | -0.291433333 |
| ANO6         | 0.1083       | 0.115233333  | -0.191633333 | 0.0481       |
| LOC730268    | -0.091066667 | 0.031833333  | -0.130666667 | -0.0101      |
| CCDC132      | -0.1764      | -0.065733333 | 0.0571       | -0.1008      |
| FAM177A1     | 0.0791       | -0.1287      | -0.102233333 | -0.115233333 |
| ADD1         | 0.248333333  | 0.0363       | -0.1939      | 0.0637       |
| KITLG        | 0.011466667  | 0.182866667  | -0.028033333 | 0.055933333  |
| ITGB2        | 0.083066667  | -0.1368      | 0.1357       | -0.004566667 |
| LRIG2        | -0.013266667 | -0.0058      | 0.050433333  | -0.045566667 |
| GLIS3        | 0.011        | -0.003633333 | 0.0672       | 0.025933333  |
| GPN2         | 0.117933333  | 0.2177       | 0.114166667  | 0.201166667  |
| TMEM184C     | -0.1511      | -0.017966667 | -0.0413      | -0.094833333 |
| LOC100130701 | 0.033766667  | -0.168166667 | 0.155933333  | -0.045566667 |
| C12orf49     | 0.030666667  | -0.044066667 | 0.116766667  | 0.064833333  |
| LOC653310    | 0.154633333  | 0.0944       | 0.039033333  | 0.0488       |
| SEC11A       | -0.153366667 | -0.0432      | -0.084033333 | -0.195466667 |
| PCDHA1       | -0.111033333 | 0.022166667  | -0.024566667 | -0.112366667 |
| LOC653375    | 0.1067       | 0.0315       | 0.025166667  | 0.088166667  |
| LOC100132797 | -0.038166667 | -0.190433333 | -0.061633333 | -0.2013      |
| PPM2C        | 0.087566667  | 0.0077       | 0.044133333  | 0.106133333  |
| GNB2L1       | -0.022966667 | -0.027866667 | -0.010333333 | -0.052833333 |
| SFRS11       | -0.042533333 | -0.0911      | -0.070033333 | -0.224833333 |
| LGALS1       | 0.089933333  | 0.060933333  | -0.054666667 | -0.0024      |
| LOC649497    | -0.054233333 | 0.014566667  | 0.0799       | 0.050166667  |
| C17orf56     | -0.006966667 | -0.006933333 | -0.0299      | -0.03        |
| ZBTB6        | 0.0313       | -0.007433333 | 0.1753       | 0.1241       |



|              |              |              |              |              |
|--------------|--------------|--------------|--------------|--------------|
| THOC1        | 0.022133333  | 0.1677       | 0.026433333  | 0.134933333  |
| DDX18        | 0.220566667  | 0.048766667  | 0.002233333  | 0.084466667  |
| ZFAND2B      | -0.053766667 | -0.147466667 | -0.073666667 | -0.0353      |
| CYB5R2       | 0.043466667  | 0.062133333  | 0.297933333  | 0.2706       |
| LOC651453    | -0.2042      | 0.084433333  | -0.133966667 | -0.150833333 |
| NY-REN-7     | 0.080266667  | -0.1794      | 0.055733333  | 0.145        |
| NDUFA10      | 0.014266667  | -0.261066667 | 0.017033333  | 0.041566667  |
| LOC100132503 | -0.0465      | -0.047366667 | 0.0365       | -0.007533333 |
| LOC728499    | 0.036266667  | 0.101766667  | 0.065266667  | -0.048733333 |
| KIAA2026     | 0.0606       | -0.011966667 | -0.089633333 | -0.076966667 |
| STRADA       | -0.187633333 | 0.011133333  | -0.053233333 | -0.0836      |
| LOC642892    | -0.0014      | -3.33E-05    | -0.009133333 | -0.044033333 |
| LOC100132773 | 0.004566667  | 0.199        | -0.0451      | 0.103933333  |
| ST7L         | -0.049066667 | 0.092033333  | -0.0837      | 0.019533333  |
| ZNF650       | 0.045233333  | -0.037533333 | -0.018133333 | 0.135033333  |
| SOHLH2       | 0.030533333  | -0.0164      | -0.017433333 | 0.024733333  |
| LOC100132323 | -0.169533333 | 0.0226       | -0.003366667 | -0.0189      |
| ZNF136       | -0.015133333 | 0.032633333  | -0.055033333 | -0.027333333 |
| LOC728481    | -0.157633333 | 0.0041       | 0.051666667  | 0.041333333  |
| NDUFV1       | -0.1117      | -0.141833333 | 0.055633333  | -0.009833333 |
| EIF4EBP2     | 0.1225       | -0.018433333 | 0.009966667  | 0.0279       |
| LOC646900    | -0.074433333 | 0.035466667  | -0.0463      | -0.1083      |
| PAGE2B       | 0.053266667  | -0.004133333 | -0.0428      | -0.0283      |
| LOC653387    | -0.045966667 | 0.035766667  | 0.044733333  | -0.023433333 |
| CAPN5        | -0.137066667 | -0.084733333 | -0.0251      | -0.113033333 |
| SLFN11       | -0.098733333 | 0.229733333  | 0.0612       | -0.040066667 |
| RNF167       | -0.013066667 | -0.081033333 | -0.059966667 | 0.069966667  |
| APOOL        | 0.0475       | 0.038566667  | -0.0037      | -0.062833333 |
| UCK1         | 0.004966667  | -0.099166667 | -0.052966667 | 0.037433333  |
| RAD54L2      | 0.003133333  | -0.0707      | 0.225733333  | -0.0265      |
| LOC401676    | -0.135966667 | -0.080133333 | -0.138933333 | -0.1427      |
| IBTK         | -0.200466667 | -0.109333333 | -0.043533333 | -0.108733333 |
| PRPF38B      | 0.011033333  | 0.064633333  | 0.072        | -0.0331      |
| TUBB         | 0.1449       | 0.164633333  | 0.171266667  | 0.128366667  |
| GOLIM4       | -0.137933333 | 0.065433333  | -0.171233333 | -0.264866667 |
| LOC727877    | -0.065433333 | -0.041866667 | -0.0167      | 0.114533333  |
| BBC3         | -0.0761      | -0.053466667 | -0.026266667 | -0.1077      |
| PHLDB3       | 0.183366667  | 0.1102       | -0.1186      | 0.079066667  |
| RAB18        | -0.0765      | -0.1679      | -0.082933333 | -0.0451      |
| RNASEK       | -0.127266667 | -0.176066667 | 0.048133333  | -0.057933333 |
| GART         | 0.162766667  | 0.005433333  | 0.223066667  | 0.0803       |
| ORMDL1       | 0.0407       | 0.0455       | 3.33E-05     | 0.015833333  |
| LOC643882    | -0.205966667 | 0.0404       | -0.1287      | -0.212166667 |
| LOC440354    | 0.0084       | -0.006533333 | -0.0414      | -0.035833333 |
| FIZ1         | -0.098866667 | -0.0507      | -0.1036      | -0.0285      |
| MAN2C1       | 0.023933333  | -0.148933333 | 0.007766667  | -0.043066667 |
| C7orf43      | 0.1184       | 0.061466667  | 0.0674       | 0.237866667  |

|              |              |              |              |              |
|--------------|--------------|--------------|--------------|--------------|
| UPRT         | 0.029633333  | -0.015466667 | 0.054966667  | 0.0591       |
| PTPN9        | 0.0861       | 0.017233333  | 0.120533333  | 0.212        |
| FGL1         | -0.0245      | -0.033833333 | 0.060966667  | -0.034033333 |
| SSRP1        | 0.131033333  | -0.013633333 | -0.083266667 | 0.007        |
| ARMC1        | -0.065733333 | 0.055666667  | 0.056033333  | 0.0136       |
| LOC644380    | 0.117966667  | 0.4088       | -0.158633333 | -0.049866667 |
| TMEM214      | 0.039566667  | 0.054866667  | -0.235233333 | -0.078633333 |
| TPRG1L       | -0.195033333 | -0.184166667 | 0.0926       | -0.043866667 |
| NQO2         | -0.2817      | -0.152933333 | -0.033366667 | -0.2287      |
| LOC100132488 | -0.019833333 | 0.021766667  | -0.097066667 | 0.0181       |
| ZMYM4        | -0.211433333 | -0.0125      | 0.0299       | -0.075066667 |
| LOC642468    | 0.083166667  | -0.044166667 | 0.156533333  | 0.059866667  |
| ACTR8        | -0.098966667 | -0.009833333 | -0.164166667 | -0.083233333 |
| ZNF598       | 0.075066667  | 0.136933333  | -0.075566667 | 0.104333333  |
| ZNF860       | 0.020466667  | 0.1208       | 0.002766667  | -0.0957      |
| SRI          | 0.304533333  | 0.063533333  | 0.135966667  | 0.2247       |
| GMFG         | -0.052166667 | -0.128166667 | 0.117633333  | 0.0102       |
| GLTPD1       | 0.1966       | 0.041833333  | -0.069933333 | 0.077333333  |
| METTL2B      | 0.071133333  | 0.134966667  | 0.116166667  | 0.035233333  |
| RINT1        | 0.185533333  | 0.101966667  | 0.0025       | 0.1386       |
| LRFN4        | -0.041733333 | 0.094366667  | -0.1543      | 0.0476       |
| LOC100130255 | 0.031933333  | -0.1302      | 0.083        | 0.0854       |
| PJA2         | -0.0297      | -0.224866667 | -0.231966667 | -0.206033333 |
| EHMT2        | -0.208233333 | 0.0039       | 0.007566667  | -0.142433333 |
| PGBD4        | -0.102666667 | -0.065433333 | -0.0429      | -0.149966667 |
| CCDC127      | 0.016533333  | -0.034333333 | 0.048233333  | 0.0552       |
| LOC391075    | -0.021766667 | 0.138266667  | -0.0178      | 0.011666667  |
| CD2BP2       | 0.091633333  | 0.0463       | 0.005366667  | 0.094866667  |
| C19orf47     | 0.059266667  | 0.0516       | 0.0241       | 0.104166667  |
| RPL39        | 0.0151       | -0.078166667 | -0.018466667 | 0.014133333  |
| GSS          | 0.079333333  | 0.0321       | 0.115466667  | 0.061633333  |
| LOC345645    | 0.220866667  | 0.045466667  | -0.050933333 | 0.039033333  |
| FAM115A      | -0.030833333 | 0.076266667  | 0.146233333  | -0.0265      |
| ROCK1        | 0.0657       | -0.053733333 | -0.005466667 | -0.0416      |
| PQLC1        | 0.039        | -0.0393      | -0.031833333 | -0.081033333 |
| RNF149       | 0.277066667  | -0.082933333 | -0.070633333 | 0.010733333  |
| C18orf22     | 0.1622       | -0.0566      | 0.1376       | 0.095666667  |
| LOC645937    | 0.2791       | 0.086233333  | -0.086966667 | 0.2119       |
| SNORD80      | 0.017966667  | 0.1743       | 0.349966667  | 0.0787       |
| DR1          | 0.194166667  | 0.200933333  | 0.072066667  | 0.086233333  |
| NUP54        | 0.187466667  | 0.132366667  | -0.010066667 | 0.141        |
| COPS4        | -0.035233333 | -0.0086      | 0.048233333  | -0.028533333 |
| COG7         | 0.097566667  | -0.070533333 | -0.087       | 0.005466667  |
| CLPX         | 0.154633333  | -0.123866667 | 0.010366667  | 0.128433333  |
| GAR1         | 0.1685       | 0.043933333  | 0.1427       | -0.027233333 |
| LOC644774    | 0.4412       | -0.0657      | 0.035066667  | 0.040133333  |
| TMEM170A     | 0.0657       | 0.121        | 0.1159       | 0.0613       |

|              |              |              |              |              |
|--------------|--------------|--------------|--------------|--------------|
| LOC440563    | 0.026466667  | 0.095233333  | -0.180066667 | 0.011433333  |
| LOC402251    | 0.013033333  | -0.160133333 | 0.0263       | 0.0561       |
| HSD17B4      | -0.1789      | -0.116       | 0.027366667  | -0.192433333 |
| FAM134C      | 0.004466667  | -0.0087      | -0.143666667 | -0.100333333 |
| LOC100130476 | 0.178166667  | -0.073466667 | -0.025933333 | 0.014666667  |
| MAPKSP1      | -0.0757      | -0.1152      | -0.114866667 | -0.184533333 |
| CCNC         | 0.240766667  | -0.148533333 | 0.251566667  | 0.124        |
| LOC342994    | -0.290866667 | 0.069766667  | -0.313766667 | -0.3695      |
| OR2A42       | 0.086066667  | -0.016366667 | -0.057966667 | -0.0189      |
| VPS36        | -0.1141      | -0.054533333 | 0.1947       | -0.006233333 |
| MCHR2        | -0.162066667 | 0.074366667  | -0.0999      | -0.113533333 |
| JAGN1        | 0.112833333  | -0.092466667 | 0.091366667  | 0.081566667  |
| C17orf89     | 0.117833333  | 0.012566667  | 0.196        | 0.256433333  |
| CLASP2       | -0.159566667 | -0.168466667 | 0.057133333  | -0.153333333 |
| ZZEF1        | -0.101766667 | -0.065066667 | -0.021166667 | -0.089433333 |
| PAGE2        | 0.042633333  | -0.0048      | 0.019533333  | -0.0146      |
| RAD51L3      | -0.065666667 | 0.0252       | 0.144466667  | 0.038466667  |
| LOC644816    | 0.019433333  | 0.183        | -0.1803      | 0.060166667  |
| C9orf102     | -0.0143      | 0.070733333  | 0.081466667  | 0.004766667  |
| LOC728024    | 0.113133333  | -0.082466667 | -0.0074      | -0.0255      |
| FBXO22       | 0.114033333  | 0.085333333  | 0.040566667  | 0.081633333  |
| C19orf64     | 0.0525       | -0.1009      | 0.1246       | 0.1258       |
| LOC648024    | 0.3075       | 0.0244       | 0.262533333  | 0.132666667  |
| FBXO27       | 0.067833333  | -0.057266667 | -0.049366667 | -0.020666667 |
| TBP          | 0.195166667  | 0.234733333  | 0.0219       | 0.07         |
| PDCD6        | -0.001233333 | -0.045633333 | -0.041466667 | -0.007433333 |
| LOC440595    | -0.9032      | 0.2114       | -0.743266667 | -0.656133333 |
| DTD1         | 0.066633333  | 0.045366667  | -0.026533333 | 0.0043       |
| C17orf68     | -0.088       | 0.009566667  | 0.0661       | -0.1087      |
| C21orf30     | -0.158966667 | -0.075533333 | 0.043866667  | 0.0414       |
| MBOAT2       | -0.061266667 | 0.019533333  | 0.027566667  | -0.198633333 |
| ZNF322A      | -0.044333333 | -0.3023      | -0.1425      | -0.117566667 |
| ATP6V1G1     | -0.0623      | -0.200033333 | -0.1069      | -0.047133333 |
| CECR7        | 0.155        | -0.045566667 | -0.144766667 | -0.053233333 |
| FLJ31306     | -0.0575      | -0.040666667 | 0.099833333  | 0.073066667  |
| ECHDC2       | -0.142866667 | -0.0176      | 0.073933333  | 0.017233333  |
| DCAF10       | -0.102666667 | -0.094866667 | -0.1644      | -0.1351      |
| SRRM1        | 0.163433333  | -0.057866667 | -0.015       | 0.113266667  |
| LOC729679    | -0.173933333 | 0.0308       | -0.003933333 | -0.105466667 |
| AKAP8        | 0.2373       | -0.023233333 | -0.104166667 | 0.0583       |
| RALGAPB      | 0.156        | -0.0333      | -0.1707      | -0.049666667 |
| ACER2        | 0.086866667  | -0.170666667 | 0.070866667  | 0.074766667  |
| LOC441775    | -0.0151      | -0.0584      | 0.059566667  | 0.0067       |
| CAMSAP1      | 0.0719       | 0.052733333  | -0.039066667 | -0.022266667 |
| UBE2F        | 0.014433333  | -0.059933333 | 0.0201       | 0.032166667  |
| PRPF8        | 0.018066667  | 0.034333333  | -0.097566667 | -0.071533333 |
| C12orf35     | -0.048433333 | -0.084933333 | 0.010666667  | 0.113966667  |

|              |              |              |              |              |
|--------------|--------------|--------------|--------------|--------------|
| GTF2IP1      | -0.0871      | -0.004933333 | -0.031       | -0.1096      |
| TCTN3        | -0.1493      | -0.061633333 | 0.205433333  | -0.164133333 |
| ZFAND6       | -0.129233333 | -0.092633333 | 0.123        | -0.070966667 |
| CDCA3        | 0.1263       | 0.158933333  | -0.082566667 | 0.045166667  |
| USP38        | 0.043166667  | -0.102066667 | -0.028766667 | 0.004533333  |
| LOC392522    | -0.169733333 | 0.014333333  | -0.1668      | -0.126233333 |
| PTPN23       | 0.0131       | -0.147366667 | 0.008066667  | -0.0992      |
| LOC646836    | -0.0464      | -0.087333333 | -0.068566667 | -0.0602      |
| TBX21        | 0.097233333  | -0.028966667 | -0.0073      | 0.142466667  |
| LOC678655    | -0.203633333 | -0.126833333 | -0.038466667 | -0.080733333 |
| LOC100132707 | -0.134066667 | -0.1407      | -0.182166667 | -0.171       |
| PABPC5       | 0.133833333  | -0.157133333 | -0.0076      | 0.009133333  |
| RAB5B        | -0.163       | -0.174166667 | 0.252333333  | -0.018333333 |
| LOC645001    | 0.057833333  | 0.0325       | 0.026433333  | 0.071933333  |
| DDX24        | -0.038333333 | 0.025633333  | 0.072666667  | -0.022833333 |
| TMEM137      | 0.057166667  | 0.1052       | 0.094733333  | -0.067066667 |
| IMPDH2       | 0.0652       | -0.051366667 | -0.057933333 | 0.015833333  |
| C6orf111     | 0.1104       | -0.100633333 | 0.066433333  | -0.019133333 |
| KCTD17       | -0.2691      | -0.020533333 | 0.028033333  | -0.119633333 |
| ZNF671       | -0.0831      | 0.101466667  | 0.032066667  | -0.050766667 |
| FLJ90086     | 0.017033333  | -0.0824      | 0.138133333  | 0.035733333  |
| RPRD1A       | -0.070766667 | 0.057733333  | 0.029833333  | -0.028166667 |
| C6orf136     | 0.118066667  | -0.054466667 | 0.006266667  | 0.0177       |
| LOC390705    | -0.000366667 | -0.069033333 | 0.0041       | -0.073233333 |
| FAM153B      | -0.074       | 0.059466667  | 0.0839       | -0.1393      |
| DERPC        | 0.149233333  | -0.051766667 | 0.0167       | 0.082966667  |
| RBM38        | 0.276533333  | 0.011733333  | 0.0167       | 0.077833333  |
| TCF7L2       | 0.087033333  | 0.046133333  | -0.037033333 | -0.067633333 |
| TBC1D15      | -0.137566667 | -0.197933333 | -0.007466667 | -0.116433333 |
| LOC646093    | -0.425233333 | 0.032766667  | -0.3824      | -0.4074      |
| SCAPER       | 0.0019       | 0.011866667  | -0.0527      | -0.142133333 |
| NES          | 0.023466667  | 0.0039       | 0.0163       | -0.039866667 |
| C1orf144     | 0.1799       | 0.118833333  | 0.002666667  | 0.087266667  |
| DOT1L        | 0.363233333  | 0.025133333  | 0.199366667  | 0.229966667  |
| CALN1        | 0.136833333  | -0.008133333 | -0.0351      | -0.0167      |
| ZNF225       | -0.047966667 | -0.037966667 | 0.037266667  | -0.077533333 |
| KLHL26       | 0.003133333  | 0.1002       | -0.0378      | -0.041233333 |
| KIF14        | 0.195433333  | 0.068833333  | -0.0632      | 0.0478       |
| C15orf29     | 0.025033333  | 0.1523       | 0.001666667  | 0.0026       |
| KIAA1429     | -0.078033333 | 0.044766667  | -0.101366667 | -0.173533333 |
| NEURL4       | 0.004266667  | -0.002566667 | -0.139233333 | 0.0795       |
| PIK3C3       | 0.0738       | 0.160033333  | 0.139666667  | 0.166566667  |
| LOC341457    | 0.053566667  | 0.118766667  | 0.026633333  | 0.0859       |
| C4orf43      | 0.130633333  | 0.1828       | -0.000766667 | -0.063366667 |
| MLL          | 0.1075       | 0.0753       | -0.017033333 | 0.037333333  |
| LOC100130553 | 0.1117       | -0.041033333 | 0.014766667  | -0.000933333 |
| ALDH18A1     | 0.0635       | -0.001233333 | 0.037533333  | -0.12        |

|              |              |              |              |              |
|--------------|--------------|--------------|--------------|--------------|
| U2AF1L2      | 0.099333333  | 0.0088       | -0.0705      | -0.0112      |
| SMEK2        | -0.105366667 | -0.1436      | -0.0452      | -0.028766667 |
| LETM1        | 0.243733333  | 0.043566667  | -0.033533333 | 0.129066667  |
| ARMC7        | 0.019466667  | -0.187366667 | -0.060933333 | -0.0505      |
| MYPOP        | 0.004866667  | 0.040966667  | -0.011       | -0.008833333 |
| SAMD4B       | 0.154566667  | -0.009766667 | -0.1315      | -0.023666667 |
| LOC100129243 | -0.436333333 | 0.0965       | -0.444933333 | -0.4141      |
| NPC2         | -0.021533333 | -0.277866667 | 0.002166667  | -0.0864      |
| ZNF283       | 0.157366667  | 0.072066667  | -0.0363      | 0.104866667  |
| CYB561       | -0.1428      | 0.081666667  | -0.111633333 | -0.1353      |
| SULT1A4      | 0.068866667  | 0.0494       | -0.073333333 | 0.222866667  |
| LOC642975    | -0.260433333 | -0.070033333 | -0.012       | -0.202333333 |
| PWWP2B       | 0.045866667  | 0.019666667  | -0.0439      | 0.112466667  |
| C14orf100    | 0.179466667  | 0.2264       | -0.181566667 | 0.142166667  |
| LOC134997    | 0.073266667  | 0.023233333  | 0.084        | 0.038166667  |
| LOC255783    | 0.003733333  | -0.2439      | -0.236       | -0.049666667 |
| SIN3A        | 0.012033333  | 0.023433333  | -0.0227      | -0.0406      |
| HCFC2        | 0.085633333  | -0.017233333 | -0.0556      | -0.046466667 |
| FBXO42       | 0.047133333  | -0.104066667 | 0.041633333  | -0.013566667 |
| LOC729898    | -0.174566667 | 0.0959       | 0.1222       | -0.0097      |
| HEATR3       | 0.283433333  | 0.122266667  | 0.014133333  | 0.1165       |
| SCFD2        | 0.006633333  | 5.00E-04     | 0.031933333  | 0.1061       |
| LAMP3        | 0.0072       | 0.129233333  | -0.070366667 | -0.009966667 |
| UST          | -0.129266667 | -0.011466667 | 0.0463       | -0.101733333 |
| SLC4A1AP     | -0.002333333 | 0.032766667  | 0.099633333  | 0.079233333  |
| COQ10B       | 0.224933333  | -0.0598      | -0.008066667 | 0.162566667  |
| TFIP11       | 0.0523       | -0.0163      | -0.023866667 | 0.055466667  |
| LOC100128498 | 0.032466667  | -0.043433333 | -0.027533333 | -0.068933333 |
| WRN          | 0.1329       | -0.003766667 | 0.0521       | 0.115166667  |
| VEZF1        | -0.034133333 | -0.051366667 | -0.147766667 | -0.125266667 |
| LOC100129742 | -0.103633333 | -0.014366667 | -0.082433333 | -0.117633333 |
| ZFP112       | -0.099433333 | -0.048933333 | -0.066133333 | -0.032       |
| GBGT1        | 0.146366667  | 0.028466667  | -0.009366667 | -0.028966667 |
| PRNP         | 0.264        | 0.242        | -0.1606      | 0.112066667  |
| B4GALT3      | -0.006866667 | 0.0499       | 0.1027       | 0.0546       |
| LOC100134711 | 0.013333333  | -0.0172      | 0.063933333  | -0.023966667 |
| RILPL1       | -0.234366667 | 0.0308       | -0.014266667 | -0.129033333 |
| LOC729142    | 0.037433333  | -0.069733333 | 0.1801       | 0.0282       |
| MED24        | 0.047666667  | -0.0644      | 0.018866667  | -0.0263      |
| LOC389342    | -0.088833333 | -0.064166667 | -0.102866667 | -0.0679      |
| WEE1         | 0.094533333  | 0.064466667  | 0.076966667  | 0.1019       |
| DGCR11       | 0.091166667  | -0.1209      | 0.023033333  | 0.037033333  |
| EIF4G3       | -0.286666667 | 0.096333333  | 0.020733333  | -0.2057      |
| LOC100128505 | -0.033166667 | 0.1821       | 0.1121       | -0.100433333 |
| FBXL3        | -0.0403      | -0.140366667 | -0.125633333 | -0.0967      |
| PLA2G7       | -0.010533333 | 0.032766667  | -0.0028      | 0.020966667  |
| SDHAF2       | -0.086933333 | 0.044333333  | 0.023866667  | -0.017633333 |

|              |              |              |              |              |
|--------------|--------------|--------------|--------------|--------------|
| ZRSR2        | -0.0977      | 0.030066667  | 0.095833333  | -0.0025      |
| FAM75B       | 0.180466667  | -0.013033333 | 0.074233333  | 0.1477       |
| ZNF160       | -0.097333333 | -0.038633333 | -0.093233333 | -0.1068      |
| LTA          | 0.224433333  | -0.0114      | 0.186833333  | 0.155566667  |
| RNF169       | 0.011533333  | 0.03         | 0.0116       | 0.0451       |
| HSPA9        | -0.021766667 | -0.081366667 | 0.026266667  | -0.031333333 |
| LOC100129426 | -0.0749      | 0.0302       | -0.040966667 | -0.132566667 |
| LOC100128816 | 0.0286       | 0.066466667  | 0.136        | 0.108466667  |
| LARS2        | 0.123066667  | 0.116933333  | 0.053433333  | 0.074533333  |
| FABP6        | 0.083766667  | 0.0097       | 0.0708       | 0.0069       |
| NFIX         | -0.031133333 | -0.088633333 | -0.3897      | -0.091       |
| ZNF384       | 0.017566667  | -0.078833333 | 0.297233333  | 0.136233333  |
| GPBP1L1      | -0.104       | 0.137133333  | -0.035066667 | -0.0931      |
| LOC654260    | 0.046933333  | 0.0243       | 0.069233333  | 0.043366667  |
| RPL26        | -0.004133333 | -0.093266667 | 0.0137       | -0.031466667 |
| IWS1         | 0.1638       | 0.0919       | 0.034366667  | 0.071366667  |
| FLOT1        | -0.2732      | -0.001       | -0.026333333 | -0.2027      |
| KCNMB2       | -0.065666667 | -0.0523      | -0.0413      | 0.057266667  |
| PLEKHA9      | 0.028066667  | 0.023133333  | 0.029        | 0.072233333  |
| EGLN2        | 0.1743       | -0.121966667 | -0.014633333 | 0.018566667  |
| OFD1         | -0.0589      | -0.0424      | -0.0758      | 0.0256       |
| SRRM1L       | 0.220166667  | -0.012066667 | 0.028566667  | 0.078166667  |
| LOC100129697 | 0.195333333  | 0.0322       | 0.148233333  | 0.1934       |
| CXorf61      | 0.035        | -0.014333333 | 0.050966667  | 0.019533333  |
| LOC727825    | 0.1503       | -0.0566      | -0.048966667 | 0.019533333  |
| MAST3        | -0.0995      | -0.053166667 | -0.013566667 | -0.094233333 |
| WDR60        | 0.0611       | -0.1264      | -0.098866667 | -0.078633333 |
| TAF5L        | 0.152833333  | 0.054366667  | 0.0367       | 0.168066667  |
| NME2         | -0.467666667 | 0.265066667  | -0.350333333 | -0.3135      |
| CCT6B        | -0.095266667 | -0.323233333 | -0.054366667 | -0.056       |
| MSL2         | 0.0486       | 0.001633333  | -0.002066667 | 0.043833333  |
| LOC649150    | -0.469833333 | 0.088633333  | -0.526333333 | -0.6136      |
| LOC642732    | -0.0568      | 0.119        | 0.001066667  | 0.055833333  |
| NSUN5        | -0.0608      | -0.0103      | 0.1309       | 0.0112       |
| KIAA0492     | -0.100066667 | 0.230633333  | 0.018733333  | -0.229866667 |
| GSG2         | 0.167166667  | 0.184733333  | 0.161933333  | 0.1047       |
| LOC100131850 | -0.073333333 | -0.098766667 | 0.191366667  | 0.069933333  |
| RPS27        | -0.0177      | -0.003833333 | -0.026666667 | 0.055633333  |
| KIAA0141     | -0.001966667 | -0.122733333 | -0.304233333 | -0.065       |
| STAM2        | 0.030633333  | -0.004866667 | -0.044066667 | -0.0137      |
| FKBP9L       | -0.200233333 | -0.200166667 | 0.012166667  | -0.193466667 |
| LOC389765    | -0.0634      | 0.331433333  | 0.155566667  | 0.054        |
| NAPA         | -0.056933333 | -0.017366667 | -0.1414      | -0.0855      |
| TSPAN14      | -0.0686      | 0.312333333  | 0.335133333  | 0.1214       |
| TAF1C        | -0.017133333 | -0.049966667 | 0.076133333  | 0.0336       |
| NCK1         | 0.1594       | 0.024966667  | -0.068133333 | 0.056333333  |
| LOC646426    | -0.0265      | 0.0343       | 0.103466667  | -0.0745      |

|              |              |              |              |              |
|--------------|--------------|--------------|--------------|--------------|
| TFPT         | 0.006133333  | -0.050866667 | 0.1249       | 0.086466667  |
| SCRN3        | -0.1612      | -0.0573      | 0.0873       | -0.210166667 |
| MAGED1       | -0.023133333 | -0.066233333 | -0.438666667 | -0.2655      |
| PIAS2        | 0.201        | 0.015833333  | 0.0583       | 0.072233333  |
| TMEM87A      | 0.0514       | -0.084566667 | 0.171666667  | 0.188766667  |
| ZC3H12C      | 0.019833333  | 0.000466667  | 0.126733333  | -0.1153      |
| FASTK        | -0.279433333 | -0.101166667 | -0.134433333 | -0.1973      |
| CD96         | -0.038966667 | 0.069533333  | 0.0083       | -0.043166667 |
| APRT         | 0.064533333  | -0.036266667 | 0.105533333  | 0.019666667  |
| RBM10        | -0.0388      | 0.229366667  | -0.0555      | -0.040933333 |
| LOC100133017 | -0.001633333 | -0.020633333 | -0.0212      | -0.006733333 |
| SNORD3A      | -0.057266667 | 0.0787       | -0.1991      | -0.195333333 |
| SORBS3       | 0.0681       | 0.0263       | -0.179766667 | -0.0362      |
| LOC729859    | -0.180066667 | -0.207133333 | 0.094833333  | -0.1301      |
| RAB1A        | -0.046566667 | 0.017066667  | 0.025633333  | -0.035233333 |
| LOC100128295 | 0.135966667  | -0.006733333 | 0.0695       | 0.1756       |
| LOC100132705 | 0.019166667  | 0.0227       | 0.014633333  | 0.076466667  |
| LOC646034    | -0.0015      | -0.010566667 | 0.1066       | -0.010266667 |
| LOC100132767 | -0.017833333 | -0.174366667 | 0.013133333  | -0.087066667 |
| UBE2Q2       | -0.078266667 | -0.107266667 | -0.164166667 | -0.1623      |
| SPTLC2       | -0.101166667 | -0.066733333 | 0.001966667  | -0.155966667 |
| ORC6L        | 0.221733333  | 0.002933333  | 0.2049       | 0.135166667  |
| PXMP3        | 0.066866667  | -0.0075      | -0.110266667 | -0.049766667 |
| HLA-DRB3     | 0.029966667  | -0.180933333 | 0.028033333  | 0.052166667  |
| HRSP12       | -0.277266667 | 0.106033333  | -0.1879      | -0.257066667 |
| MOBK13       | 0.359033333  | 0.0647       | -0.072933333 | 0.168866667  |
| MED1         | 0.040166667  | -0.1009      | 0.022933333  | -0.0085      |
| ZNF138       | 0.018766667  | 0.019        | 0.018966667  | 0.0611       |
| NUBPL        | -0.219566667 | 0.0382       | 0.093266667  | -0.2803      |
| SYT15        | 0.0747       | -0.0263      | -0.006833333 | -0.048733333 |
| RPL27A       | 0.054866667  | -0.021       | 0.01         | -0.016466667 |
| DMAP1        | -0.025266667 | 0.141866667  | -0.0587      | 0.0467       |
| ZNF148       | -0.1732      | 0.1242       | -0.0053      | -0.104466667 |
| HNRNPUL1     | 0.137166667  | -0.055033333 | -0.0774      | 0.0691       |
| NSUN4        | -0.078033333 | -0.171566667 | -0.182233333 | -0.144333333 |
| C6orf57      | -0.194733333 | 0.060333333  | 0.054        | -0.026833333 |
| STAM         | 0.097166667  | -0.194766667 | -0.038966667 | -0.0656      |
| FN3KRP       | 0.0412       | 0.067366667  | 0.0883       | 0.150466667  |
| ZNF573       | -0.23        | 0.0606       | -0.163033333 | -0.055633333 |
| LOC100128585 | -0.060233333 | -0.046166667 | 0.073666667  | -0.0229      |
| FLJ23584     | -0.1479      | -0.096966667 | -0.0295      | -0.132466667 |
| ZNF25        | -0.128666667 | 0.007        | -0.103866667 | -0.157866667 |
| STAT6        | -0.064633333 | 0.020533333  | -0.0017      | -0.001366667 |
| ZNF322B      | -0.062       | -0.1628      | 0.0247       | -0.063066667 |
| SLC33A1      | -0.174966667 | 0.160266667  | -0.0173      | -0.202       |
| ORC5L        | 0.115166667  | 0.046166667  | -0.085033333 | -0.059666667 |
| SNORD4A      | 0.1451       | 0.055166667  | 0.2559       | 0.143533333  |

|              |              |              |              |              |
|--------------|--------------|--------------|--------------|--------------|
| B4GALNT1     | 0.074466667  | -0.054566667 | 0.0711       | 0.0104       |
| LOC728748    | -0.0396      | -0.012133333 | -0.009066667 | -0.241766667 |
| SNORD3C      | -0.0384      | -0.0718      | -0.0105      | -0.025666667 |
| RFX1         | -0.017233333 | -0.103       | -0.086166667 | -0.129233333 |
| VPS52        | -0.0455      | -0.136166667 | -0.058633333 | 0.006        |
| DUSP23       | -0.025633333 | 0.0122       | 0.068533333  | 0.122666667  |
| RANBP9       | -0.014266667 | -0.028433333 | -0.04        | -0.047966667 |
| LOC284230    | 0.029866667  | 0.0084       | 0.011533333  | -0.012233333 |
| LOC642321    | -0.065466667 | 0.076966667  | -0.0107      | -0.1213      |
| NBEAL2       | 0.061733333  | -0.020533333 | 0.049633333  | -0.0588      |
| NFYB         | -0.008033333 | 0.033666667  | -0.1309      | -0.149233333 |
| ZNF532       | 0.016233333  | 0.017166667  | -0.0305      | 0.0667       |
| LOC100132652 | 0.099166667  | 0.092633333  | -0.0363      | 0.231933333  |
| RIMBP3       | 0.050733333  | -0.034633333 | 0.057366667  | 0.079766667  |
| KIAA1285     | 0.1098       | -0.0985      | 0.075033333  | 0.213866667  |
| MTO1         | 0.116933333  | 0.010166667  | -0.139433333 | 0.049933333  |
| LOC100133477 | 0.116666667  | 0.005966667  | 0.160666667  | 0.0658       |
| PAK1         | 0.036966667  | 0.0514       | 0.017233333  | 0.059766667  |
| JMJD2A       | 0.079766667  | 0.057366667  | -0.254433333 | -0.040233333 |
| LOC286467    | -0.066533333 | 0.004466667  | 0.1563       | 0.050633333  |
| C19orf10     | 0.094133333  | -0.031666667 | -0.057566667 | 0.059533333  |
| FAM44A       | -0.037433333 | 0.017666667  | -0.018666667 | -0.132266667 |
| LOC285412    | 0.058866667  | -0.035333333 | -0.053933333 | 0.058166667  |
| FBXW9        | -0.198833333 | -0.196733333 | 0.114133333  | -0.0603      |
| ELOVL6       | -0.037033333 | 0.160133333  | 0.036966667  | 0.024533333  |
| LOC441601    | 0.031833333  | 0.009033333  | 0.040433333  | 0.007566667  |
| LOC286016    | 0.133633333  | 0.012366667  | 0.129833333  | 0.0253       |
| RELA         | 0.189033333  | 0.096166667  | 0.036866667  | 0.1837       |
| LOC642755    | -0.012566667 | -0.212       | 0.011        | -0.0648      |
| NARF         | -0.028866667 | 0.103066667  | -0.1106      | -0.120433333 |
| ARMCX1       | -0.0709      | -0.2129      | -0.144933333 | -0.2212      |
| LOC727980    | 0.284066667  | 0.125        | 0.0751       | 0.122766667  |
| MTBP         | 0.0708       | 0.184366667  | 0.048933333  | 0.1113       |
| LOC653829    | -0.098633333 | -0.0359      | 0.0963       | -0.243633333 |
| LOC644739    | -0.1042      | 0.233866667  | 0.0185       | -0.001166667 |
| SYNJ1        | -0.0141      | -0.089733333 | -0.083866667 | -0.0447      |
| LOC729985    | -0.035266667 | -0.118033333 | 0.048233333  | -0.0303      |
| LOC647074    | -0.301566667 | 0.116733333  | -0.410866667 | -0.3483      |
| SNORA68      | 0.0257       | 0.012833333  | 0.0606       | 0.117266667  |
| EEF1G        | -0.102666667 | -0.136833333 | -0.091433333 | -0.246833333 |
| C1orf174     | 0.1071       | 0.122833333  | -0.073533333 | -0.037       |
| GALNS        | -0.052966667 | -0.051133333 | -0.0976      | -0.054566667 |
| PSEN1        | -0.035066667 | 0.030133333  | -0.117966667 | -0.134166667 |
| SPRN         | 0.033433333  | -0.1728      | 0.0311       | 0.037833333  |
| TMEM19       | -0.1061      | -0.056733333 | 0.126666667  | -0.0587      |
| MED23        | -0.0292      | 0.082433333  | -0.069066667 | -0.077933333 |
| LOC441241    | 0.113433333  | 0.063933333  | -0.052133333 | 0.0246       |



|              |              |              |              |              |
|--------------|--------------|--------------|--------------|--------------|
| DFFA         | 0.2517       | 0.209333333  | 0.055033333  | 0.178        |
| CXorf15      | 0.174666667  | 0.011633333  | 0.084866667  | 0.039233333  |
| ZMYM5        | -0.120833333 | -0.071866667 | -0.043433333 | -0.042833333 |
| AACSL        | 0.158966667  | -0.024066667 | -0.0836      | 0.092533333  |
| LOXL4        | 0.060133333  | 0.0244       | 0.005633333  | -0.024       |
| LOC648176    | -0.0325      | -0.073533333 | 0.011633333  | -0.147733333 |
| VISA         | -0.0243      | 0.0592       | 0.043966667  | 0.0809       |
| LOC100129424 | -0.074666667 | -0.0266      | -0.0137      | -0.107366667 |
| NOB1         | 0.042        | 0.040833333  | -0.006233333 | 0.047033333  |
| UVRAG        | 0.078733333  | 0.1745       | -0.0302      | 0.205566667  |
| SOLH         | 0.1814       | 0.141466667  | 0.042        | 0.005066667  |
| ACTR6        | -0.011133333 | 0.0038       | -0.001066667 | -0.014533333 |
| CDC14A       | 0.197033333  | 0.037233333  | 0.026366667  | 0.098333333  |
| RGPD8        | 0.078166667  | 0.0732       | 0.080166667  | -0.060433333 |
| RBBP9        | -0.0297      | -0.046233333 | 0.123933333  | 0.026333333  |
| DYNLRB1      | 0.049833333  | -0.108933333 | 0.152566667  | 0.100733333  |
| TUBA1B       | 0.056666667  | 0.092        | 0.163966667  | 0.008833333  |
| LOC643358    | 0.0391       | -0.030966667 | 0.0099       | -0.060533333 |
| DYNC2L1      | -0.113533333 | -0.114433333 | -0.057333333 | -0.072366667 |
| IER3IP1      | 0.020866667  | -0.159033333 | -0.1639      | -0.123566667 |
| RPL27        | -0.0143      | 0.042766667  | -0.054433333 | -0.004966667 |
| LOC642031    | 0.137933333  | 0.094        | 0.043533333  | 0.069133333  |
| RPS15A       | 0.016333333  | 0.040533333  | 0.030733333  | 0.024366667  |
| PCGF5        | -0.040933333 | -0.111433333 | -0.167966667 | -0.2266      |
| MLX          | 0.219366667  | 0.167833333  | 0.250266667  | 0.302266667  |
| BAGE4        | -0.024166667 | 0.089966667  | -0.031       | 0.011233333  |
| ANKRD22      | -0.0365      | 0.0199       | 0.010166667  | -0.067166667 |
| DNAJB2       | -0.142166667 | -0.1781      | -0.252633333 | -0.076133333 |
| WASH5P       | -0.038466667 | 0.097333333  | 0.040533333  | 0.0015       |
| C13orf25     | 0.042433333  | 0.191566667  | -0.034966667 | -0.010466667 |
| CXXC1        | 0.0024       | 0.033166667  | -0.087933333 | -0.001133333 |
| LOC730288    | -0.260866667 | -0.005866667 | -0.205066667 | -0.194333333 |
| LOC643905    | 0.004033333  | -0.0731      | 0.032833333  | 0.061066667  |
| CTAG1A       | 0.0716       | 0.004033333  | -0.005533333 | -0.0035      |
| CRIP2        | 0.146666667  | 0.118866667  | -0.2528      | 0.010933333  |
| TMED5        | 0.0397       | 0.099833333  | 0.059766667  | 0.0059       |
| LOC641367    | 0.188766667  | 0.012866667  | 0.129366667  | 0.207633333  |
| HEXA         | -0.059266667 | -0.130466667 | -0.122233333 | -0.080266667 |
| ANKMY1       | -0.114833333 | -0.0813      | 0.017        | -0.1266      |
| ADRA2B       | -0.0618      | -0.046433333 | 0.021633333  | -0.0425      |
| PNO1         | 0.191233333  | 0.235466667  | 0.139766667  | 0.174033333  |
| ITCH         | 0.2232       | -0.137466667 | -0.223133333 | -0.1338      |
| CHST2        | 0.2346       | -0.0175      | 0.203033333  | 0.342433333  |
| RPL13A       | -0.0836      | -0.0711      | 0.0659       | -0.064233333 |
| ZNF30        | 0.045566667  | 0.0138       | -0.069933333 | 0.106633333  |
| RBM12        | 0.416333333  | 0.2612       | 0.2097       | 0.295333333  |
| SMYD2        | -0.0389      | -0.056133333 | 0.1312       | 0.0634       |

|              |              |              |              |              |
|--------------|--------------|--------------|--------------|--------------|
| TUBB4Q       | 0.193733333  | 0.090133333  | 0.0746       | 0.058166667  |
| NFKBIE       | 0.1122       | 0.153133333  | 0.2463       | 0.316366667  |
| ZNF17        | -0.0479      | -0.086566667 | 0.059366667  | -0.015166667 |
| CDC25B       | 0.091133333  | -0.0266      | -0.039766667 | -0.0038      |
| FKBP1P1      | 0.005333333  | 0.180066667  | 0.040933333  | -0.012866667 |
| NUDT3        | -0.007366667 | 0.108533333  | 0.213133333  | 0.063966667  |
| DOK4         | 0.025        | -0.069433333 | 0.008133333  | -0.0288      |
| KLHL12       | -0.1038      | -0.1231      | -0.075466667 | -0.1378      |
| C4orf46      | 0.091166667  | 0.065966667  | -0.037766667 | 0.039533333  |
| C2orf30      | -0.006       | 0.163266667  | -0.153       | -0.0087      |
| TTC13        | -0.036366667 | -0.0355      | 0.114433333  | 0.034933333  |
| C12orf41     | 0.138433333  | -0.030866667 | -0.0092      | -0.042366667 |
| COPG2        | -0.0437      | -0.062166667 | -0.014766667 | -0.1695      |
| ATP5G1       | 0.0304       | 0.088366667  | 0.2564       | 0.1287       |
| CAB39L       | -0.0581      | -0.0711      | 0.191133333  | -0.039566667 |
| JUND         | 0.087133333  | -0.185233333 | -0.081866667 | 0.051433333  |
| KBTBD2       | 0.045933333  | -0.108033333 | 0.1654       | 0.024633333  |
| LOC729090    | 0.101133333  | 0.0831       | 0.128766667  | 0.027033333  |
| EIF1AD       | 0.2201       | 0.082266667  | -0.105066667 | 0.107466667  |
| HEATR6       | -0.0858      | -0.106166667 | -0.156533333 | -0.19        |
| AK3L1        | 0.2293       | 0.144633333  | 0.032133333  | -0.099433333 |
| ZNF581       | -0.0205      | -0.0912      | -0.0709      | -0.140166667 |
| YTHDC2       | -0.019966667 | -0.142       | 0.089466667  | -0.119866667 |
| SHPK         | -0.012       | 0.065133333  | 0.0702       | 0.0307       |
| HKR1         | -0.086866667 | -0.0231      | -0.0582      | -0.1824      |
| TADA1L       | 0.003466667  | -0.0447      | -0.061766667 | -0.048866667 |
| ENO3         | -0.172933333 | -0.2006      | -0.049833333 | -0.2593      |
| ARD1B        | 0.093333333  | 0.000166667  | -0.013533333 | -0.039133333 |
| FOXR2        | 0.036866667  | -0.0223      | 0.005466667  | -0.054833333 |
| FAM73B       | -0.0154      | -0.014566667 | 0.005        | 0.052866667  |
| LOC730051    | 0.020633333  | 0.028666667  | 0.033733333  | -0.087       |
| ZBTB80S      | -0.0168      | -0.061133333 | 0.057366667  | 0.0578       |
| LOC100129952 | -0.508733333 | 0.195566667  | -0.4564      | -0.551666667 |
| ZNF124       | 0.125633333  | 0.224166667  | 0.071866667  | 0.071133333  |
| FBXO18       | -0.104333333 | 0.1112       | -0.0671      | -0.127       |
| CCNH         | 0.189666667  | 0.005966667  | 0.229733333  | 0.2016       |
| ABCD3        | -0.004366667 | -0.1134      | 0.012866667  | -0.197433333 |
| SNORD78      | -0.108566667 | 0.000633333  | 0.117        | -0.0937      |
| LOC644642    | -0.276       | 0.143433333  | -0.031266667 | -0.195666667 |
| LOC442153    | 0.196466667  | 0.1621       | 0.0333       | 0.143533333  |
| ZDHC12       | -0.044666667 | 0.052566667  | 0.043566667  | 0.0464       |
| SLC25A25     | 0.2736       | 0.131966667  | 0.2594       | 0.4028       |
| TMLHE        | -0.080733333 | -0.093866667 | 0.0271       | -0.1371      |
| MTMR9        | 0.237433333  | 0.103266667  | 0.039966667  | 0.209433333  |
| LOC388275    | 0.2852       | -0.149733333 | 0.036333333  | 0.1456       |
| HACL1        | 0.050533333  | -0.066033333 | 0.023866667  | 0.083866667  |
| SLITRK1      | 0.017766667  | 0.059766667  | 0.042966667  | -0.0362      |

|              |              |              |              |              |
|--------------|--------------|--------------|--------------|--------------|
| DCTN3        | -0.0516      | -0.0056      | 0.082133333  | 0.069366667  |
| GOLPH4       | -0.068766667 | 0.061766667  | -0.353366667 | -0.2625      |
| MIR345       | -0.007633333 | -0.161433333 | 0.0214       | -0.1204      |
| MPRIP        | -0.117       | 0.010833333  | 0.0756       | -0.067566667 |
| ETFA         | 0.019733333  | 0.0998       | 0.0561       | -0.0563      |
| KIAA0776     | -0.142166667 | 0.0459       | -0.083366667 | -0.180833333 |
| RASSF5       | 0.151966667  | -0.223533333 | -0.026666667 | 0.122        |
| CYTH1        | 0.0625       | -0.009333333 | 0.0721       | 0.1291       |
| LOC100130802 | -0.399966667 | 0.214866667  | -0.219366667 | -0.3181      |
| LOC642393    | 0.113166667  | -0.008666667 | 0.0611       | 0.179033333  |
| ZDHHC18      | 0.221933333  | 0.098933333  | -0.063566667 | 0.103166667  |
| C9orf41      | 0.132133333  | 0.122733333  | 0.175666667  | -0.068033333 |
| LOC100129958 | 0.269666667  | -0.025433333 | 0.189866667  | 0.1065       |
| ANKRD13D     | 0.064633333  | -0.123233333 | 0.1416       | 0.0113       |
| LYAR         | 0.643933333  | 0.4666       | 0.467566667  | 0.512733333  |
| GLTSCR1      | 0.064766667  | -0.093666667 | -0.033066667 | 0.023633333  |
| LOC647104    | 0.0729       | -0.0263      | -0.170733333 | -0.021233333 |
| PCDH20       | -0.0118      | 0.012066667  | 0.051133333  | -0.028333333 |
| LRRC23       | -0.134966667 | -0.095666667 | -0.038333333 | -0.089833333 |
| PHF23        | -0.087       | -0.1197      | 0.0994       | -0.044933333 |
| RPS9         | -0.0669      | -0.116633333 | 0.026266667  | -0.0834      |
| CTNNB1       | -0.021       | -0.027566667 | 0.0625       | 0.0214       |
| SLC29A2      | -0.0085      | 0.009966667  | 0.016033333  | 0.010266667  |
| RPS19        | 0.056066667  | 0.0197       | -0.002033333 | -0.002333333 |
| CCBE1        | 0.049366667  | 0.334533333  | 0.188033333  | 0.031333333  |
| LOC100130518 | 0.089066667  | 0.020566667  | -0.0047      | 0.089333333  |
| EML2         | -0.024966667 | -0.0982      | 0.021566667  | -0.056066667 |
| GSTK1        | -0.172466667 | -0.148366667 | 0.054566667  | -0.087033333 |
| ALDH2        | 0.046233333  | 0.0809       | 0.028733333  | 0.016633333  |
| C9orf156     | 0.0183       | -0.101333333 | -0.081933333 | 0.0796       |
| UBE3A        | 0.002666667  | 0.125766667  | 0.090333333  | 0.072766667  |
| C19orf56     | -0.0818      | -0.082033333 | -0.006466667 | -0.065466667 |
| LOC100132364 | 0.019733333  | -0.107533333 | 0.1094       | 0.017233333  |
| YRDC         | 0.386466667  | 0.2814       | 0.260933333  | 0.376366667  |
| GPM6A        | 0.170466667  | 0.198533333  | -0.06        | 0.154966667  |
| LOC401677    | -0.345133333 | 0.0145       | -0.168866667 | -0.325       |
| LOC729760    | -0.3955      | 0.076166667  | -0.300566667 | -0.327633333 |
| RAPGEF1      | -0.049966667 | -0.2222      | -0.104466667 | -0.068266667 |
| LOC644689    | 0.041066667  | 0.0158       | -0.049933333 | -0.027633333 |
| ANKRD9       | -0.023366667 | 0.0623       | 0.125333333  | -0.005066667 |
| CREBL1       | -0.015366667 | -0.085533333 | 0.0925       | -0.032966667 |
| LOC439949    | 0.054233333  | 0.0254       | 0.061866667  | 0.0178       |
| CYLN2        | 0.0408       | -0.062266667 | -0.065066667 | 0.015433333  |
| MRPS33       | -0.181       | -0.095033333 | 0.034933333  | -0.243666667 |
| DNAJC14      | -0.057866667 | 0.0474       | 0.0562       | -0.010166667 |
| ATP6V1D      | 0.029433333  | 0.0665       | 0.0177       | 0.0242       |
| AMZ2         | -0.1518      | -0.017833333 | 0.0584       | -0.0634      |

|              |              |              |              |              |
|--------------|--------------|--------------|--------------|--------------|
| LOC653458    | -0.039933333 | 0.003        | 0.012133333  | -0.0828      |
| SV2A         | -0.046233333 | 0.021833333  | 0.019966667  | -0.057466667 |
| FLJ46309     | -0.1401      | 0.109033333  | 0.1856       | -0.0407      |
| XAGE1        | 0.1537       | -0.0417      | 0.066066667  | -0.0549      |
| LOC147727    | -0.065866667 | -0.078766667 | -0.132233333 | -0.081133333 |
| WBP4         | 0.1737       | 0.093033333  | -0.136666667 | 0.1885       |
| RPS5         | 0.034533333  | -0.0375      | 0.045133333  | -0.069866667 |
| SMARCC1      | 0.025666667  | 0.0216       | 0.040033333  | -0.1112      |
| DCUN1D1      | 0.075233333  | 0.0172       | 0.093433333  | 0.026566667  |
| NEIL3        | 0.072066667  | 0.083733333  | -0.085533333 | 0.043866667  |
| PMS2L1       | -0.044       | 0.037866667  | -0.061133333 | -0.091766667 |
| UTP3         | 0.094633333  | 0.269        | 0.119266667  | 0.165033333  |
| MIR1978      | -0.1052      | -0.158166667 | -0.441233333 | -0.1544      |
| PAK4         | 0.164033333  | 0.2788       | -0.040333333 | -0.1384      |
| GIYD2        | 0.087833333  | 0.003266667  | 0.004066667  | -0.008266667 |
| BAZ2B        | -0.322733333 | -0.134166667 | 0.102166667  | -0.2046      |
| TAF1L        | -0.005733333 | 0.047533333  | -0.023833333 | -0.0505      |
| NUDT22       | -0.167933333 | -0.126666667 | 0.067433333  | -0.141       |
| GPS1         | 0.034533333  | 0.0535       | 0.065866667  | -0.0075      |
| FAM98B       | 0.152266667  | 0.090266667  | 0.136333333  | -0.043033333 |
| CELSR3       | -0.132366667 | -0.0321      | -0.158266667 | -0.141266667 |
| HACE1        | 0.093333333  | -0.118966667 | 0.1843       | 0.1435       |
| CDC2L6       | -0.4135      | -0.154066667 | 0.012266667  | -0.3842      |
| RPS20        | 0.058633333  | -0.0033      | -0.0491      | -0.0214      |
| THEX1        | 0.068833333  | 0.0927       | 0.073833333  | 0.0525       |
| GABPB1       | 0.145166667  | 0.190766667  | 0.080466667  | 0.053633333  |
| LOC100133913 | 0.118933333  | 0.012833333  | 0.0259       | 0.126233333  |
| LOC100133473 | 0.290233333  | 0.032133333  | -0.059133333 | 0.002366667  |
| DHRS7B       | -0.021233333 | -0.009766667 | 0.138366667  | -0.002433333 |
| TOM1L1       | 0.049966667  | -0.102333333 | -0.006533333 | -0.119633333 |
| LOC100130750 | -0.206766667 | 0.1402       | -0.276866667 | -0.3382      |
| CTDSPL       | 0.047766667  | 0.128633333  | 0.0957       | 0.139266667  |
| LOC100133916 | 0.024566667  | -0.008366667 | 0.065933333  | -0.073633333 |
| TMEM4        | -0.142833333 | -0.011433333 | -0.1146      | -0.162666667 |
| ZNF605       | 0.0106       | -0.120666667 | -0.044866667 | -0.0484      |
| NFYA         | 0.111966667  | 0.1664       | 0.074866667  | 0.1606       |
| NEIL2        | 0.051466667  | 0.067266667  | -0.187066667 | -0.0305      |
| GSTM1        | -0.257266667 | -0.155733333 | 0.195933333  | -0.172733333 |
| LOC100128291 | -0.114       | 0.088466667  | 0.221833333  | 0.020766667  |
| NVL          | 0.053533333  | 0.109966667  | 0.057233333  | 0.0562       |
| SLC4A11      | -0.1687      | -0.1172      | 0.071433333  | 0.020566667  |
| LOC100128936 | -0.067166667 | 0.0249       | -0.087566667 | -0.103266667 |
| PIGL         | 0.0875       | 0.0064       | 0.115933333  | 0.049166667  |
| RNF213       | -0.021866667 | -0.023566667 | 0.064766667  | -0.1487      |
| APOBEC3D     | -0.083866667 | -0.0818      | 0.039933333  | -0.1095      |
| C6orf170     | -0.245633333 | 0.197233333  | -0.082366667 | -0.317733333 |
| FLJ44342     | -0.117333333 | 0.184133333  | 0.073433333  | -0.226166667 |

|              |              |              |              |              |
|--------------|--------------|--------------|--------------|--------------|
| ANKRD26      | -0.010866667 | -0.016466667 | -0.038466667 | -0.186566667 |
| NCAPD2       | -0.016833333 | 0.302433333  | 0.019666667  | -0.014833333 |
| MAN2B1       | -0.157566667 | -0.0299      | -0.0591      | -0.1415      |
| RBM27        | 0.148633333  | -0.1171      | 0.049733333  | 0.078033333  |
| LIMK1        | -0.026666667 | 0.166633333  | 0.251866667  | 0.1543       |
| LOC648581    | 0.059066667  | -0.065866667 | -0.107233333 | -0.185366667 |
| LOC399804    | 0.0373       | 0.083366667  | 0.0274       | 0.003933333  |
| REXO4        | 0.102633333  | -0.0019      | 0.057433333  | 0.056466667  |
| KIAA1160     | -0.054966667 | 0.001666667  | 0.022366667  | 0.0048       |
| AP1B1        | 0.012566667  | 0.1778       | 0.216633333  | 0.077033333  |
| TPD52        | -0.238633333 | -0.013633333 | 0.159133333  | -0.1974      |
| LOC100132037 | -0.047433333 | -0.120033333 | -0.036533333 | -0.146033333 |
| HOMER1       | 0.065733333  | 0.161533333  | 0.0206       | 0.037566667  |
| C14orf153    | -0.077833333 | 0.1833       | 0.094266667  | 6.00E-04     |
| TMEM9        | -0.053033333 | 0.0315       | -0.167066667 | -0.089466667 |
| MAMLD1       | 0.218766667  | 0.105533333  | -0.298633333 | -0.076133333 |
| SCP2         | -0.107466667 | -0.041833333 | 0.0465       | -0.016666667 |
| RELL2        | -0.0411      | -0.024166667 | -0.0179      | -0.082933333 |
| TRIP13       | 0.209833333  | 0.2691       | -0.0508      | 0.0394       |
| HNRPUL1      | 0.083633333  | 0.1628       | -0.070466667 | -0.035466667 |
| PPAPDC2      | -0.0933      | -0.045533333 | -0.0329      | -0.0359      |
| FASTKD3      | 0.2637       | -0.0624      | 0.225766667  | 0.253266667  |
| LOC645323    | -0.181233333 | -0.1384      | 0.009        | -0.253433333 |
| FKBP9        | -0.0893      | -0.084433333 | -0.057       | -0.180466667 |
| RG9MTD3      | -0.028733333 | 0.035633333  | -0.051866667 | -0.007133333 |
| TBC1D3F      | 0.170733333  | -0.1694      | 0.0577       | 0.000333333  |
| HOXB6        | 0.108033333  | 0.008766667  | 0.083333333  | 0.1008       |
| FLOT2        | -0.0843      | 0.016333333  | 0.144233333  | -0.076166667 |
| TM9SF1       | 3.33E-05     | 0.0131       | -0.045866667 | -0.1137      |
| LOC100131608 | -0.060233333 | -0.1116      | 0.2184       | -0.076433333 |
| DRG2         | -0.095433333 | 0.126066667  | -0.061433333 | -0.022033333 |
| PRR3         | 0.260666667  | -0.168433333 | 0.143366667  | 0.163133333  |
| C20orf29     | -0.1801      | -0.095766667 | 0.0555       | -0.0348      |
| MAP3K2       | 0.012133333  | -0.020533333 | -0.173133333 | -0.051366667 |
| LOC646956    | 0.0781       | 0.0392       | 0.172766667  | 0.030433333  |
| PPP2R5C      | -0.078933333 | 0.039433333  | 0.103433333  | -0.143733333 |
| LOC100130758 | 0.048533333  | 0.058366667  | 0.060966667  | 0.112966667  |
| ARHGAP11B    | 0.230733333  | 0.039233333  | 0.2219       | 0.033966667  |
| DDX3X        | 0.392766667  | -0.051766667 | 0.0501       | 0.186433333  |
| FIGNL2       | -0.028833333 | -0.029733333 | 0.034466667  | -0.037066667 |
| TNPO3        | -0.046766667 | 0.084833333  | -0.1973      | -0.0941      |
| LOC100130707 | -0.0738      | -0.140566667 | 0.098766667  | -0.085233333 |
| SNAP47       | -0.007866667 | 0.049933333  | 0.007033333  | 0.1695       |
| YOD1         | 0.156466667  | -0.134566667 | 0.086966667  | -0.083466667 |
| ATPBD4       | -0.127533333 | -0.0407      | -0.007066667 | -0.098233333 |
| C6orf125     | -0.172166667 | 0.062        | 0.1798       | -0.0607      |
| LRRK1        | -0.0801      | 0.157166667  | -0.050833333 | -0.041466667 |

|              |              |              |              |              |
|--------------|--------------|--------------|--------------|--------------|
| EXOC1        | -0.060733333 | -0.0756      | -0.008266667 | -0.0688      |
| ARID2        | 0.1749       | 0.018766667  | 0.099033333  | 0.007833333  |
| ANPEP        | 0.071233333  | -0.022633333 | 0.0501       | -0.032233333 |
| LOC644935    | -0.0073      | -0.0514      | 0.0337       | -0.2293      |
| YARS         | -0.0304      | -0.082933333 | -0.059533333 | -0.0388      |
| LOC645586    | 0.0109       | -0.1702      | 0.0325       | 0.060566667  |
| PPCS         | -0.153366667 | -0.232       | -0.0447      | -0.210233333 |
| NENF         | -0.219566667 | -0.017833333 | -0.098533333 | -0.122433333 |
| ZBTB2        | -0.077       | 0.0255       | -0.038666667 | -0.123233333 |
| NADK         | -0.039       | -0.095633333 | -0.001433333 | -0.016733333 |
| R3HDM1       | -0.142266667 | 0.0701       | 0.0684       | -0.049833333 |
| ZNF341       | 0.013833333  | -0.022166667 | 0.0185       | 0.017633333  |
| HOXA6        | -0.0542      | -0.067733333 | 0.1095       | -0.093466667 |
| BRMS1        | 0.2586       | 0.042266667  | -0.1424      | 0.032633333  |
| ZNF358       | -0.214933333 | -0.2422      | -0.129733333 | -0.1825      |
| LOC100133607 | 0.033833333  | 0.071233333  | 0.1234       | 0.0513       |
| CNO          | 0.026366667  | 0.066866667  | -0.092366667 | -0.045633333 |
| PTCD1        | -0.0302      | 0.112033333  | -0.024733333 | -0.013533333 |
| BMP4         | 0.059333333  | -0.1577      | 0.059366667  | -0.072533333 |
| LOC126235    | -0.235866667 | 0.064866667  | -0.229333333 | -0.234133333 |
| TEX2         | 0.157966667  | 0.039033333  | -0.1316      | -0.083566667 |
| C20orf43     | -0.097366667 | -0.0677      | 0.080266667  | -0.0587      |
| GNAQ         | 0.0372       | 0.0517       | 0.086733333  | 0.067433333  |
| LOC653702    | -0.368566667 | -0.0217      | -0.325833333 | -0.280266667 |
| LOC728037    | 0.069433333  | 0.057466667  | 0.027933333  | 0.021366667  |
| METTLL14     | 0.1007       | 0.048666667  | 0.087233333  | 0.0559       |
| UBE2M        | 0.0373       | 0.0863       | 0.002        | 0.006633333  |
| SH3GL1       | 0.253133333  | -0.023033333 | 0.213033333  | 0.214033333  |
| SLC38A7      | -0.146833333 | -0.018366667 | -0.0165      | -0.073133333 |
| ELTD1        | 0.018433333  | -0.046133333 | 0.095566667  | 0.018033333  |
| FOSL1        | 0.805633333  | 0.598833333  | 0.2349       | 0.669566667  |
| PRNPIP       | -0.083666667 | -0.030633333 | -0.0569      | -0.049733333 |
| ASMTL        | -0.064733333 | -0.026666667 | 0.0865       | -0.020733333 |
| MCM2         | 0.079133333  | 0.1827       | 0.0877       | -0.005766667 |
| NSUN5B       | -0.141433333 | -0.093       | -0.026       | -0.229466667 |
| ERGIC2       | -0.014633333 | 0.1692       | 0.020666667  | 0.023233333  |
| LOC728658    | 0.0193       | -0.019133333 | 0.038766667  | 0.001        |
| ANKRD40      | 0.0885       | 0.021833333  | 0.072633333  | 0.127866667  |
| AGXT2L2      | -0.148666667 | -0.1657      | 0.0067       | -0.097266667 |
| LOC645296    | -0.047266667 | 0.025633333  | -0.037433333 | -0.1352      |
| LOC727984    | -0.2114      | -0.055133333 | -0.153033333 | -0.2072      |
| LOC440525    | 0.089        | 0.0463       | -0.031266667 | 0.072733333  |
| SNRNP25      | 0.137133333  | 0.012533333  | 0.056266667  | 0.066866667  |
| HOXD4        | 0.142933333  | 0.221633333  | -0.029       | 0.0356       |
| LOC100132324 | 0.010666667  | -0.001666667 | -0.1073      | 0.0203       |
| LOC343184    | -0.0045      | -0.0074      | 0.0014       | -0.137333333 |
| MIR586       | 0.3725       | 0.1055       | 0.189333333  | 0.209666667  |

|              |              |              |              |              |
|--------------|--------------|--------------|--------------|--------------|
| GTF2I        | 0.054266667  | 0.073333333  | -0.008233333 | -0.011466667 |
| POU4F1       | 0.061        | 0.1444       | 0.023466667  | 0.123433333  |
| LOC100128883 | -0.007966667 | -0.0136      | -0.010033333 | -0.062233333 |
| PKNOX1       | -0.0216      | -0.0206      | 0.0591       | 0.004133333  |
| VIM          | 0.0875       | 0.039166667  | 0.001166667  | 0.0154       |
| LQK1         | -0.2355      | -0.119066667 | -0.066033333 | -0.115733333 |
| EBF1         | -0.0514      | -0.0054      | -0.019066667 | -0.062466667 |
| LOC644265    | -0.026733333 | -0.128933333 | 0.1231       | 0.106566667  |
| CLN8         | -0.1186      | -0.059433333 | 0.039733333  | 0.028333333  |
| COPB2        | 0.0962       | -0.0237      | -0.1472      | -0.1484      |
| CSK          | 0.009033333  | 0.287733333  | 0.0254       | 0.076033333  |
| LOC100127999 | -0.1254      | 0.002533333  | 0.015466667  | -0.1196      |
| UBR3         | 0.029066667  | 0.032833333  | -0.039266667 | 0.016266667  |
| TMEM70       | -0.5345      | 0.2167       | -0.6024      | -0.513966667 |
| METTL1       | 0.125166667  | 0.195433333  | 0.0991       | 0.146366667  |
| ATP6V1A      | -0.221633333 | -0.1305      | 0.061366667  | -0.100433333 |
| GP1BA        | 0.1318       | -0.074433333 | 0.088533333  | 0.105133333  |
| C14orf93     | -0.250933333 | -0.200366667 | -0.045833333 | -0.2172      |
| LOC644879    | 0.398633333  | 0.151633333  | -0.112933333 | 0.1276       |
| UBE2R2       | -0.022266667 | 0.017233333  | 0.0614       | -0.051133333 |
| LOC100130092 | 0.144633333  | 0.235433333  | 0.036266667  | 0.1313       |
| COL16A1      | 0.034566667  | 0.090533333  | -0.222833333 | 0.0182       |
| LOC401238    | 0.1471       | 0.059433333  | 0.093833333  | -0.031533333 |
| NDUFV3       | 0.004366667  | 0.105366667  | 0.145033333  | 0.015966667  |
| LOC100129902 | 0.0026       | 0.001833333  | 0.043133333  | -0.034333333 |
| GLI3         | 0.0054       | -0.0249      | -0.0877      | -0.162366667 |
| SNX16        | -0.0608      | 0.009066667  | 0.0162       | 0.109666667  |
| SERINC1      | -0.104133333 | -0.163966667 | 0.021766667  | -0.0583      |
| ALMS1        | -0.116633333 | 0.131        | -0.0347      | -0.098966667 |
| LOC85389     | 0.280966667  | 0.0204       | 0.073566667  | 0.1181       |
| KPNA2        | 0.3761       | 0.0544       | 0.007033333  | 0.081866667  |
| EXOC6        | 0.163033333  | 0.149466667  | 0.034166667  | 0.181166667  |
| POR          | -0.025466667 | -0.017033333 | -0.159466667 | -0.0876      |
| VPS13A       | -0.067833333 | 0.097233333  | -0.017433333 | -0.0938      |
| SLC35F2      | 0.3314       | 0.2166       | 0.141866667  | 0.192566667  |
| ZNF331       | -0.1654      | -0.106766667 | 0.1019       | -0.036233333 |
| UPF2         | 0.0312       | -0.065666667 | 0.037033333  | 0.0653       |
| LOC440926    | -0.373933333 | 0.020533333  | -0.300766667 | -0.406       |
| TMEM99       | 0.006033333  | 0.1405       | -0.058033333 | 0.030266667  |
| ZNF638       | 0.0155       | -0.072633333 | -0.065233333 | -0.003033333 |
| LOC100125556 | 0.088633333  | -0.080833333 | 0.0946       | -0.065966667 |
| C1orf84      | 0.111433333  | 0.083733333  | -0.092133333 | -0.035366667 |
| CBY1         | -0.268233333 | -0.020066667 | -0.0876      | -0.175033333 |
| LOC284167    | 0.119266667  | 0.086966667  | -0.0313      | 0.004133333  |
| MYD88        | 0.077966667  | -0.0413      | 0.022933333  | 0.159166667  |
| PPP2CB       | 0.0631       | 0.095566667  | -0.0607      | 0.0465       |
| PCOLCE       | 0.0583       | 0.010166667  | -0.1089      | -0.0178      |

|              |              |              |              |              |
|--------------|--------------|--------------|--------------|--------------|
| LOC400389    | -0.230366667 | 0.0796       | -0.028333333 | -0.246833333 |
| DBT          | -0.3637      | -0.085833333 | 0.028        | -0.2723      |
| LOC642299    | -0.096466667 | -0.024933333 | 0.0056       | -0.244666667 |
| BBS4         | 0.040166667  | -0.203466667 | -0.0575      | -0.106133333 |
| ZBTB45       | -0.008633333 | 0.068166667  | 0.047133333  | -0.061166667 |
| LOC652324    | 0.049933333  | 0.0684       | 0.1268       | -0.062866667 |
| LOC399900    | 0.0627       | 0.102        | 0.1325       | 0.061066667  |
| LOC100133264 | 0.119066667  | -0.03        | 0.0817       | 0.191766667  |
| EXOSC3       | 0.362733333  | 0.384133333  | 0.090966667  | 0.212933333  |
| ZKSCAN4      | -0.022166667 | -0.068666667 | -0.0734      | -0.162333333 |
| SNX26        | 0.0602       | -0.062433333 | 0.052466667  | 0.0149       |
| LOC647361    | 0.019966667  | 0.030966667  | 0.016533333  | 0.0309       |
| CCDC135      | 0.130066667  | -0.0302      | 0.001566667  | 0.023266667  |
| YTHDF1       | 0.109433333  | -0.040566667 | 0.066433333  | 0.081866667  |
| EIF3M        | -0.038366667 | 0.032533333  | -0.064133333 | 0.027533333  |
| FAHD2B       | -0.3127      | 0.009366667  | 0.215133333  | -0.1321      |
| RAB43        | 0.137633333  | 0.063066667  | 0.183666667  | 0.1273       |
| CEPT1        | -0.0362      | -0.0201      | 0.030733333  | -0.0989      |
| RNF220       | 0.003733333  | -0.0829      | -0.038066667 | -0.058433333 |
| SRPRB        | 0.140666667  | 0.0527       | 0.001933333  | 0.113266667  |
| XAGE1B       | 0.032833333  | 0.1379       | -0.0099      | 0.008733333  |
| ENO2         | 0.082        | 0.106566667  | 0.0341       | -0.161266667 |
| C5orf22      | 0.113766667  | -0.0387      | 0.045133333  | 0.0094       |
| LOC440345    | 0.0137       | -0.0292      | -0.0009      | -0.117166667 |
| ZNF234       | -0.1727      | -0.013333333 | 0.1189       | -0.056066667 |
| RPA2         | -0.0399      | 0.0429       | 0.1553       | 0.032933333  |
| SERTAD2      | 0.326266667  | 0.0749       | 0.111733333  | 0.1786       |
| ELOVL1       | 0.027266667  | 0.170233333  | 0.069033333  | 0.003        |
| PEX26        | -0.1333      | 0.087733333  | -0.090733333 | -0.1804      |
| SNORD35B     | 0.1604       | 0.087866667  | 0.006233333  | -0.034033333 |
| LOC646753    | 0.084533333  | 0.020766667  | 0.060133333  | 0.030366667  |
| KIAA1310     | -0.2453      | -0.1477      | -0.075233333 | -0.182166667 |
| ANP32B       | -0.013233333 | -0.017133333 | -0.015766667 | -0.1074      |
| ZNF420       | -0.015433333 | 0.048433333  | 0.030066667  | -0.0005      |
| ARHGAP1      | 0.101833333  | -0.2113      | -0.001466667 | -0.060233333 |
| LOC731308    | -0.2634      | 0.415166667  | -0.316966667 | -0.2975      |
| SETD1B       | -0.081066667 | -0.026066667 | -0.026866667 | -0.002       |
| MCPH1        | -0.0532      | -0.037333333 | -0.0502      | -0.098033333 |
| LOC100133673 | 0.083266667  | 0.201666667  | 0.113033333  | 0.196066667  |
| IFFO2        | 0.236666667  | -0.018866667 | 0.082133333  | 0.113733333  |
| FAM38B       | -0.055133333 | -0.091133333 | 0.0318       | -0.111666667 |
| LOC644621    | -0.006166667 | 0.065133333  | 0.0417       | -0.0442      |
| ZNF425       | -0.141866667 | -0.230866667 | -0.140333333 | -0.282633333 |
| B4GALT4      | 0.119633333  | 0.094366667  | -0.018633333 | -0.031533333 |
| SF1          | -0.0809      | -0.064133333 | 0.0767       | -0.1569      |
| LOC100132804 | -0.230733333 | 0.0415       | -0.4484      | -0.384233333 |
| LOC643911    | -0.071066667 | -0.1054      | -0.324766667 | -0.287433333 |



|              |              |              |              |              |
|--------------|--------------|--------------|--------------|--------------|
| COX10        | 0.097466667  | 0.045266667  | 0.022666667  | 0.090133333  |
| TMSB4X       | 0.0295       | 0.097966667  | 0.052266667  | -0.0176      |
| C11orf63     | -0.302966667 | 0.311666667  | -0.042033333 | -0.362433333 |
| LOC100132369 | 0.2097       | -0.252866667 | 0.181333333  | 0.148066667  |
| MRPL27       | 0.074266667  | -0.143266667 | -0.024866667 | 0.0289       |
| ZNF324       | 0.053033333  | 0.057233333  | 0.004466667  | 0.1149       |
| RSBN1        | 0.110666667  | -0.037866667 | 0.0739       | 0.1252       |
| LOC729324    | 0.0104       | 0.096333333  | 0.131133333  | -0.031066667 |
| NCRNA00200   | 0.073966667  | -0.093033333 | 0.0621       | 0.058833333  |
| LOC388720    | 0.0195       | -0.031266667 | 0.033766667  | -0.1746      |
| RNF103       | -0.0542      | -0.2678      | -0.0644      | -0.124066667 |
| FAM164A      | -0.017466667 | -0.1228      | -0.0996      | -0.1067      |
| LOC653377    | 0.1199       | 0.059366667  | 0.034166667  | 0.121233333  |
| TOPORS       | -0.030233333 | 0.062933333  | 0.179666667  | -0.100833333 |
| LOC391777    | -0.026533333 | 0.028666667  | -0.041733333 | 0.014766667  |
| SENP5        | 0.140433333  | 0.178166667  | 0.0192       | 0.111566667  |
| ZNF551       | 0.2206       | 0.2191       | 0.129866667  | 0.000966667  |
| BCKDK        | -0.0029      | 0.0625       | 0.0375       | -0.101133333 |
| LOC100133390 | -0.024633333 | -0.035566667 | 0.0172       | 0.0293       |
| STK24        | 0.049766667  | 0.076766667  | -0.016233333 | 0.040533333  |
| LOC400455    | -0.022266667 | 0.0023       | -0.079966667 | -0.087733333 |
| BCDIN3D      | -0.1596      | -0.065833333 | -0.0276      | 0.010933333  |
| PIGM         | -0.2103      | 0.0956       | -0.087233333 | -0.222066667 |
| TCF25        | -0.197133333 | -0.151933333 | -0.060566667 | -0.2561      |
| RNPC3        | -0.071766667 | -0.079       | -0.0005      | -0.0554      |
| DYNLT3       | 0.0291       | 0.025166667  | 0.072        | -0.0145      |
| LOC732075    | 0.033866667  | -0.008966667 | -0.0859      | -0.1378      |
| CADM4        | -0.0217      | -0.028466667 | 0.0846       | -0.0367      |
| ARCN1        | 0.154266667  | 0.1039       | -0.206333333 | -0.0923      |
| RRM2         | 0.344133333  | 0.190866667  | 0.123233333  | 0.230733333  |
| LRTOMT       | -0.092033333 | -0.018033333 | 0.033233333  | -0.1585      |
| LOC100128737 | 0.084633333  | 0.057866667  | -0.0167      | 0.128        |
| SNORD38A     | 0.1323       | -0.0778      | 0.072333333  | 0.0257       |
| SSR1         | 0.129266667  | 0.168866667  | -0.095266667 | -0.0411      |
| GM2A         | -0.128433333 | -0.083733333 | 0.1403       | -0.232766667 |
| UBR2         | -0.052833333 | -0.0241      | -0.011933333 | -0.107433333 |
| CDAN1        | 0.166866667  | 0.155566667  | -0.0504      | 0.062566667  |
| NOP14        | 0.143233333  | 0.2081       | -0.019466667 | 0.148866667  |
| MLPH         | -0.236366667 | -0.173933333 | 0.149766667  | -0.128033333 |
| ST3GAL2      | 0.015566667  | 0.172666667  | 0.0729       | -0.022166667 |
| NPY5R        | 0.036766667  | 0.006666667  | -0.025233333 | 0.059833333  |
| ADCY7        | 0.044533333  | 0.0459       | 0.265266667  | 0.081833333  |
| C17orf48     | -0.073666667 | 0.018333333  | -0.0039      | -0.094133333 |
| CNPY2        | -0.079633333 | 0.0371       | -0.1783      | -0.056133333 |
| SNRPE        | 0.016133333  | 0.2356       | -0.1204      | -0.109633333 |
| MSN          | 0.1552       | 0.106        | 0.024466667  | 0.067733333  |
| HOXD8        | -0.004666667 | -0.0781      | -0.094166667 | -0.092133333 |

|              |              |              |              |              |
|--------------|--------------|--------------|--------------|--------------|
| MMAB         | -0.230533333 | -0.043       | -0.11        | -0.0834      |
| SNORD12      | 0.251633333  | 0.276133333  | 0.084433333  | 0.064733333  |
| CDC2L1       | 0.060233333  | -0.094266667 | 0.043966667  | -0.055666667 |
| RSF1         | 0.109766667  | -0.054833333 | -0.105133333 | 0.044866667  |
| LOC732360    | 0.096733333  | 0.2025       | 0.11         | 0.102133333  |
| LOC440733    | 0.021266667  | 0.021666667  | 0.013533333  | -0.0168      |
| HSCB         | 0.123266667  | 0.0116       | -0.015266667 | 0.140533333  |
| NOL10        | 0.134133333  | -0.072       | 0.015366667  | 0.0187       |
| METAP1       | 0.064466667  | 0.131266667  | 0.117933333  | 0.097966667  |
| RAB40B       | -0.1726      | -0.153433333 | 0.008833333  | -0.193533333 |
| MLL5         | 0.006333333  | -0.088766667 | -0.065766667 | -0.085       |
| USO1         | -0.0886      | 0.039866667  | -0.163966667 | -0.205666667 |
| LOC100132391 | -0.007266667 | 0.361533333  | 0.248566667  | -0.097366667 |
| VWA3A        | 0.015766667  | -0.075066667 | 0.027266667  | -0.082866667 |
| LOC100133298 | -0.19        | 0.0541       | -0.028066667 | -0.1282      |
| TUSC1        | 0.0916       | -0.0569      | -0.198966667 | -0.015633333 |
| FAM40A       | 0.012266667  | -0.155033333 | 0.032933333  | -0.0379      |
| SNORD34      | 0.220633333  | 0.017166667  | 0.1523       | 0.039233333  |
| LOC100128266 | 0.076666667  | 0.1375       | 0.112133333  | 0.053533333  |
| ZUFSP        | 0.1575       | 0.1239       | 0.137        | 0.181866667  |
| ENTPD3       | 0.149533333  | -0.207233333 | 0.021933333  | 0.021133333  |
| BAX          | -0.004366667 | 0.030166667  | 0.123533333  | 0.060866667  |
| SLAIN1       | 0.012266667  | 0.065233333  | -0.042833333 | -0.082333333 |
| C6orf106     | 0.104533333  | -0.0103      | 0.130266667  | -0.017633333 |
| LOC643509    | 0.053833333  | 0.072233333  | 0.139        | -0.010733333 |
| LOC654135    | 0.182266667  | 0.0548       | 0.204433333  | 0.153666667  |
| MIR1185-1    | 0.059533333  | -0.040366667 | -0.061633333 | 0.096066667  |
| ATF6         | 0.013066667  | -0.161466667 | -0.0793      | -0.1739      |
| UBQLN2       | -0.136166667 | -0.094166667 | -0.127566667 | -0.099433333 |
| SMARCAL1     | -0.088166667 | -0.0114      | -0.0331      | -0.2753      |
| SHROOM4      | 0.0838       | 0.365333333  | 0.269466667  | 0.0723       |
| ANGEL2       | -0.1156      | -0.024533333 | 0.0659       | -0.0351      |
| SKP2         | 0.149566667  | 0.343733333  | 0.318266667  | 0.1675       |
| CATSPER2     | -0.034266667 | 0.285233333  | 0.347533333  | -0.015466667 |
| LOC650037    | 0.065433333  | 0.008466667  | -0.029133333 | -0.0948      |
| ZNF728       | -0.1617      | 0.101933333  | -0.0775      | -0.129666667 |
| CYCS         | -0.0183      | 0.011133333  | -0.0448      | 0.048833333  |
| PAFAH2       | -0.006733333 | 0.089033333  | -0.189866667 | -0.1289      |
| ZDHHC20      | 0.0919       | 0.102333333  | 0.025333333  | -0.015333333 |
| DCAF6        | 0.0158       | -0.2129      | 0.117066667  | -0.2191      |
| SNRPA        | 0.239033333  | -0.035933333 | 0.024666667  | 0.072233333  |
| TK1          | 0.033633333  | 0.302033333  | -0.0758      | 0.035966667  |
| ZNF548       | -0.091366667 | -0.100833333 | -0.161533333 | -0.087233333 |
| LOC650298    | 0.021966667  | 0.072733333  | 0.1241       | -0.006966667 |
| NDUFS1       | -0.0772      | 0.060266667  | -0.055133333 | -0.090866667 |
| LOC651397    | 0.0403       | 0.057933333  | -0.0036      | -0.0022      |
| MRM1         | 0.037766667  | 0.004533333  | 0.081033333  | 0.063266667  |

|              |              |              |              |              |
|--------------|--------------|--------------|--------------|--------------|
| BLM          | 0.0416       | 0.106533333  | 0.140266667  | 0.030633333  |
| USP16        | 0.041666667  | 0.0463       | -0.118766667 | -0.0233      |
| DECR1        | -0.3821      | -0.0335      | 0.099333333  | -0.2119      |
| LOC100133465 | -0.0408      | -0.0015      | 0.0703       | -0.0917      |
| LOC642446    | 0.029866667  | -0.072366667 | 0.024766667  | -0.064033333 |
| CHCHD3       | 0.154633333  | 0.1254       | 0.005233333  | 0.064733333  |
| CRHR1        | 0.1136       | -0.058566667 | -0.058766667 | 0.106933333  |
| SUZ12        | 0.180733333  | 0.131833333  | 0.062166667  | 0.0533       |
| SETD1A       | 0.1103       | 0.0097       | -0.032733333 | -0.057166667 |
| LOC728517    | 0.021233333  | 0.017433333  | 0.0545       | -0.0126      |
| ZNF207       | 0.170566667  | 0.1097       | -0.015233333 | 0.1329       |
| CRIP1        | -0.168766667 | -0.094733333 | 0.1993       | -0.1325      |
| PEX1         | -0.1646      | -0.081633333 | 0.174333333  | -0.120266667 |
| CLPTM1       | -0.0616      | -0.025166667 | -0.010966667 | -0.0142      |
| CHTF8        | 0.0472       | 0.007766667  | 0.003766667  | -0.018033333 |
| ADAL         | -0.013033333 | -0.049966667 | 0.125833333  | -0.032866667 |
| LOC100131387 | -0.007966667 | 0.0308       | -0.0415      | -0.0706      |
| SULF2        | -0.006       | 0.0725       | 0.016733333  | -0.115233333 |
| C16orf91     | 0.154166667  | 0.1513       | -0.048866667 | 0.038466667  |
| SLC35A1      | -0.345766667 | -0.005166667 | 0.0689       | -0.168066667 |
| LPCAT2       | 0.090466667  | -0.031666667 | 0.031633333  | 0.0057       |
| MIR599       | 0.084566667  | 0.0314       | 0.008966667  | 0.097266667  |
| VDAC1        | 0.224033333  | 0.089966667  | -0.020733333 | 0.069533333  |
| LOC653264    | 0.026133333  | 0.090733333  | -0.060033333 | -0.1037      |
| LOC729992    | -0.2072      | -0.0598      | -0.054433333 | -0.2186      |
| HSBP1        | -0.097466667 | 0.060466667  | 0.064833333  | 0.035366667  |
| IL17RC       | -0.214233333 | -0.096133333 | -0.0767      | -0.1908      |
| SCYL2        | -0.027133333 | -0.057966667 | 0.119066667  | 0.053833333  |
| MRPL32       | 0.028766667  | 0.0567       | 0.203533333  | 0.125866667  |
| MATR3        | 0.0409       | 0.061        | 0.185166667  | 0.061433333  |
| PRIC285      | -0.1567      | -0.0295      | 0.081        | -0.190766667 |
| SNORA73A     | 0.295666667  | 0.1406       | 0.541966667  | 0.086566667  |
| LOC100132901 | 0.175833333  | -0.065666667 | -0.116466667 | 0.048166667  |
| GPR172A      | 0.2009       | -0.014833333 | -0.054133333 | -0.013266667 |
| TIPIN        | 0.1444       | 0.262033333  | 0.0505       | 0.1163       |
| LOC389101    | 0.0542       | -0.050133333 | 0.028766667  | -0.080733333 |
| FUK          | -0.0389      | -0.024433333 | 0.025666667  | -0.139433333 |
| CBFB         | 0.179        | 0.004266667  | 0.022366667  | 0.174933333  |
| ERF          | 0.259866667  | -0.172766667 | 0.064133333  | -0.020233333 |
| C18orf25     | 0.2785       | 0.160466667  | -0.0791      | 0.010766667  |
| ZNF642       | -0.005933333 | 0.0122       | -0.023       | 0.0732       |
| CTNND1       | 0.111366667  | -0.076833333 | 0.0962       | 0.012133333  |
| NFX1         | 0.0978       | -0.042266667 | -0.073666667 | -0.034466667 |
| WTIP         | 0.256        | 0.1176       | -0.0244      | 0.213533333  |
| RPS2         | 0.0556       | -0.168966667 | -0.0152      | -0.110833333 |
| TNRC6A       | 0.102033333  | 0.178        | -0.056666667 | 0.024233333  |
| INF2         | 0.350666667  | 0.1934       | -0.1845      | 0.0951       |

|              |              |              |              |              |
|--------------|--------------|--------------|--------------|--------------|
| TSTA3        | 0.291033333  | 0.0814       | -0.079266667 | 0.052066667  |
| EDG4         | -0.098166667 | -0.085733333 | 0.1523       | 0.0039       |
| LOC646897    | -0.183466667 | 0.0517       | 0.067766667  | -0.204       |
| DNAL1        | 0.1574       | 0.1068       | -0.092433333 | 0.014033333  |
| OSBP         | -0.0867      | -0.091333333 | -0.178933333 | -0.1249      |
| SIKE         | 0.036966667  | 0.1843       | 0.048466667  | -0.039033333 |
| ZNF134       | 0.007633333  | -0.059166667 | 0.050333333  | -0.042533333 |
| LOC653242    | -0.128       | -0.032933333 | 0.054266667  | -0.131766667 |
| KPNB1        | 0.282766667  | 0.058966667  | -0.002233333 | 0.013566667  |
| XRCC1        | 0.106233333  | 0.296633333  | 0.1171       | 0.1695       |
| LOC100130179 | 0.1684       | -0.0214      | 0.139766667  | 0.006533333  |
| AKAP10       | 0.131833333  | -0.0109      | 0.037966667  | -0.0004      |
| LOC285216    | -0.006433333 | -0.041033333 | -0.295566667 | -0.1739      |
| C4orf14      | -0.150433333 | -0.1068      | -0.029333333 | -0.073       |
| RPS3         | -0.044266667 | -0.095       | 0.046333333  | -0.163333333 |
| LOC644809    | 0.013266667  | 0.027466667  | 0.1829       | 0.1793       |
| LOC651149    | -0.136166667 | -0.229       | 0.084233333  | -0.330566667 |
| SLC19A2      | -0.0605      | -0.191066667 | 0.060533333  | 0.051666667  |
| RSRC1        | 0.0686       | 0.077633333  | 0.0446       | -0.004166667 |
| EFNA4        | -0.051766667 | -0.139366667 | 0.024833333  | -0.080133333 |
| LARP1B       | 0.419866667  | 0.0649       | -0.0698      | 0.231266667  |
| CLRN1        | 0.102366667  | -0.042366667 | -0.057566667 | -0.040533333 |
| LOC100130932 | 0.122466667  | 0.210466667  | 0.191066667  | 0.087533333  |
| LOC729739    | -0.092766667 | 0.088966667  | 0.160966667  | -0.063833333 |
| PCDHB6       | -0.0534      | 0.1793       | -0.041533333 | 0.0649       |
| TAOK1        | 0.003966667  | 0.0421       | -0.120633333 | -0.292933333 |
| STARD10      | -0.215033333 | -0.142066667 | 0.056833333  | -0.185166667 |
| UMPS         | 0.0898       | 0.117966667  | 0.116566667  | 0.0755       |
| PTPN13       | -0.2038      | -0.082133333 | -0.1739      | -0.160133333 |
| ELAC1        | -0.181733333 | -0.0034      | -0.1679      | -0.1441      |
| TBCE         | 0.1549       | 0.013366667  | 0.026433333  | -0.0002      |
| ANKS3        | -0.014066667 | 0.161133333  | -0.028833333 | 0.092766667  |
| WDR7         | -0.027266667 | -0.1076      | -0.083366667 | -0.248366667 |
| DIS3L        | -0.163533333 | -0.192233333 | 0.004133333  | -0.2211      |
| C21orf81     | -0.308533333 | 0.070766667  | -0.0952      | -0.167866667 |
| NUP85        | 0.209833333  | 0.093433333  | 0.058433333  | 0.173333333  |
| RPS11        | -0.007666667 | 0.010833333  | -0.0142      | -0.002566667 |
| LOC100131531 | 0.201        | 0.1015       | -0.0356      | 0.0453       |
| TAF12        | -0.1017      | 0.0103       | -0.0593      | -0.160333333 |
| AACS         | -0.015566667 | -0.012033333 | 0.134566667  | -0.087266667 |
| KIAA1641     | 0.085166667  | -0.023433333 | 0.003066667  | -0.110133333 |
| RNU6-15      | 0.116133333  | -0.0115      | -0.0361      | 0.032566667  |
| KIAA0460     | -0.0599      | 0.046366667  | 0.052466667  | 0.003266667  |
| LOC389137    | -0.1228      | 0.1964       | 0.156333333  | 0.053566667  |
| PMS2         | -0.108966667 | -0.082133333 | 0.0404       | -0.2237      |
| LOC283755    | 0.031633333  | 0.027033333  | 0.0247       | -0.062333333 |
| CITED4       | 0.0892       | 0.048233333  | 0.014333333  | -0.038633333 |

|           |              |              |              |              |
|-----------|--------------|--------------|--------------|--------------|
| TMOD2     | -0.1105      | -0.034966667 | 0.027        | -0.099566667 |
| MYST1     | -0.068733333 | -0.1152      | 0.0612       | -0.0474      |
| SNORA73B  | 0.152466667  | 0.158033333  | 0.4569       | 0.0383       |
| TFDP2     | -0.045166667 | -0.235333333 | 0.232533333  | -0.063466667 |
| LOC728208 | 0.002533333  | 0.0599       | 0.104066667  | 0.0542       |
| LOC441087 | 0.059033333  | 0.276766667  | 0.1328       | 0.193433333  |
| LOC646675 | -0.014933333 | -0.055466667 | 0.1297       | -0.007966667 |
| ZNF529    | -0.0087      | -0.109233333 | -0.032566667 | -0.0257      |
| SNX11     | 0.2167       | 0.143866667  | 0.0682       | 0.116466667  |
| SLC39A9   | -0.017       | 0.095933333  | -0.011266667 | -0.030666667 |
| SMUG1     | -0.159666667 | 0.0353       | 0.033        | -0.234566667 |
| TSEN54    | 0.015966667  | 0.093233333  | 0.012633333  | -0.010666667 |
| GABPA     | 0.013866667  | -0.160133333 | -0.014233333 | -0.1112      |
| LOC728115 | 0.152        | 0.198933333  | 0.068266667  | 0.028733333  |
| UQCR      | 0.113733333  | 0.065633333  | -0.032966667 | 0.110733333  |
| PAIP2     | 0.011933333  | -0.0292      | 0.167433333  | -0.0371      |
| LOC440359 | 0.164933333  | 0.064466667  | 0.0955       | 0.058566667  |
| LOC645715 | -0.021266667 | 0.0668       | -0.0574      | -0.072166667 |
| PASK      | 0.0792       | 0.066733333  | 0.082666667  | -0.010766667 |
| LOC440055 | 0.0704       | -0.0847      | -0.1421      | -0.024566667 |
| CGRRF1    | -0.0226      | 0.028633333  | 0.0022       | 0.011466667  |
| ZNF837    | -0.095233333 | -0.1502      | -0.098633333 | -0.2253      |
| UFD1L     | 0.143933333  | 0.057433333  | 0.0318       | 0.0939       |
| C1orf19   | -0.023833333 | 0.047266667  | -0.031333333 | -0.028466667 |
| ZDHHC9    | -0.0057      | -0.046066667 | -0.007366667 | -0.158166667 |
| FAM127C   | -0.058333333 | -0.165133333 | 0.1228       | -0.0394      |
| C17orf37  | -0.2362      | 0.001833333  | 0.1096       | -0.055966667 |
| ABHD6     | -0.2225      | 0.013033333  | -0.023       | -0.2156      |
| KTN1      | -0.025366667 | 0.0239       | -0.074233333 | -0.1736      |
| PCDHB5    | -0.037766667 | 0.026633333  | 0.0551       | -0.044033333 |
| CCDC130   | 0.024033333  | -0.1164      | -0.095866667 | -0.090633333 |
| VAMP7     | 0.0369       | -0.085666667 | 0.138433333  | -0.036166667 |
| NUDT7     | -0.079966667 | 0.014566667  | -0.040133333 | -0.184166667 |
| THOC5     | 0.0186       | -0.033333333 | -0.000966667 | -0.086866667 |
| LOC728564 | 0.152333333  | 0.026033333  | 0.079933333  | -0.006866667 |
| LARP7     | -0.080733333 | 0.126933333  | -0.055466667 | -0.089833333 |
| LOC729120 | -0.0486      | 0.364766667  | 0.178166667  | -0.057833333 |
| DNASE1L1  | -0.040166667 | -0.1289      | -0.042266667 | -0.1531      |
| LOC730004 | -0.242766667 | 0.0265       | -0.446033333 | -0.303       |
| ATP5SL    | 0.026733333  | -0.061966667 | -0.056633333 | 0.0142       |
| EIF4A1    | 0.183266667  | 0.1134       | 0.1671       | 0.138433333  |
| PMS1      | -0.1579      | -0.051433333 | 0.0979       | -0.090733333 |
| FUCA2     | 0.0646       | -0.176633333 | 0.066733333  | -0.076266667 |
| RPL19     | 0.0746       | 0.0007       | 0.029966667  | -0.026366667 |
| LOC652634 | 0.103033333  | 0.084766667  | 0.0468       | 0.020433333  |
| RFC4      | 0.1389       | 0.117733333  | 0.054666667  | 0.054466667  |
| TMEM18    | 0.020933333  | -0.0041      | -0.110166667 | -0.0737      |

|              |              |              |              |              |
|--------------|--------------|--------------|--------------|--------------|
| LOC730535    | 0.070333333  | 0.222933333  | 0.142966667  | 0.060833333  |
| PDF          | 0.1999       | 0.027233333  | 0.1607       | -0.061133333 |
| LOC644315    | -0.501266667 | 0.104866667  | -0.4049      | -0.529633333 |
| PSMC2        | 0.117466667  | 0.081166667  | 0.0301       | 0.035133333  |
| LOC100130445 | -0.213566667 | -0.022666667 | 0.271        | -0.1684      |
| SFRS5        | 0.108533333  | -0.0693      | 0.016166667  | -0.067733333 |
| LOC391370    | -0.111166667 | 0.040866667  | 0.007366667  | -0.086266667 |
| TRAK1        | -0.167266667 | -0.0079      | -0.138366667 | -0.2175      |
| SNORD15B     | 0.169        | 0.142033333  | -0.0294      | 0.015766667  |
| C3orf50      | -0.024666667 | 0.1182       | 0.0169       | -0.045566667 |
| LOC642255    | 0.070466667  | 0.101933333  | 0.0188       | 0.0784       |
| CAMK4        | 0.049166667  | 0.174166667  | 0.016933333  | 0.128466667  |
| LOC100132213 | 0.1151       | -0.0918      | -0.017233333 | 0.060833333  |
| ARMET        | 0.064466667  | 0.231466667  | 0.2025       | 0.074966667  |
| C20orf4      | 0.114233333  | 0.011466667  | -0.128033333 | -0.0341      |
| PHKG2        | 0.1004       | -0.016333333 | 0.096533333  | -0.064633333 |
| STK35        | 0.1557       | 0.149533333  | 0.042833333  | 0.112166667  |
| UNC50        | 0.032        | -0.1718      | -0.067833333 | -0.053166667 |
| PPPDE1       | 0.2043       | -0.005       | -0.0525      | -0.026266667 |
| TRIM28       | 0.0522       | 0.187533333  | 0.1322       | 0.1235       |
| CENPC1       | 0.1491       | 0.051066667  | -0.026433333 | -0.004566667 |
| DNAJC17      | 0.132133333  | -0.027133333 | 0.130666667  | 0.0112       |
| C12orf48     | 0.140666667  | 0.019466667  | -0.0149      | -0.035166667 |
| GSR          | -0.193933333 | -0.143133333 | -0.0316      | -0.180966667 |
| LOC727797    | -0.0304      | -0.076266667 | 0.1435       | 0.0675       |
| NUDT16L1     | 0.170833333  | -0.022666667 | -0.0365      | 0.164466667  |
| C11orf10     | -0.077433333 | -0.032033333 | -0.078433333 | -0.1382      |
| EDEM3        | -0.1791      | 0.088266667  | 0.0744       | -0.094466667 |
| SEC23A       | 0.110533333  | -0.1075      | -0.066966667 | -0.155833333 |
| LOC441876    | 0.0065       | 0.092566667  | 0.004366667  | -0.046366667 |
| PTOV1        | -0.185       | -0.0367      | -0.0849      | -0.200766667 |
| PXMP4        | -0.166866667 | -0.0863      | 0.011133333  | -0.179133333 |
| SAMD1        | -0.039933333 | 0.244033333  | 0.0465       | -0.1074      |
| AMY1B        | -0.414233333 | 0.1813       | -0.5853      | -0.51        |
| MGC3032      | 0.183533333  | 0.023766667  | -0.1178      | 0.005866667  |
| SSX4         | 0.0078       | -0.020466667 | 0.066833333  | -0.077166667 |
| LOC644604    | 0.028166667  | 0.020333333  | 0.0352       | -0.048733333 |
| IAH1         | -0.080933333 | 0.039833333  | 0.087833333  | -0.0317      |
| IFIT5        | 0.0866       | 0.122033333  | -0.007466667 | 0.008033333  |
| BIVM         | 0.0179       | 0.1059       | -0.114333333 | -0.169633333 |
| INTS1        | 0.044533333  | -0.011633333 | -0.037266667 | -0.159633333 |
| RCHY1        | 0.014533333  | 0.061933333  | 0.162        | 0.112566667  |
| CLOCK        | -0.104333333 | 0.053666667  | 0.071633333  | -0.0131      |
| RTCD1        | 0.139866667  | 0.093166667  | -0.0423      | 0.049766667  |
| SEC22C       | 0.052566667  | 0.104066667  | 0.075033333  | 0.058633333  |
| LOC100129979 | -0.062266667 | -0.111766667 | -0.030166667 | -0.161466667 |
| TMEM206      | 0.125566667  | 0.1801       | -0.0463      | 0.011166667  |

|           |              |              |              |              |
|-----------|--------------|--------------|--------------|--------------|
| AEBP1     | 0.0243       | 0.166533333  | -0.0655      | -0.113033333 |
| FLJ35390  | -0.312333333 | 0.2724       | 0.1275       | -0.228766667 |
| C1orf109  | 0.219033333  | 0.0313       | -0.022466667 | 0.151966667  |
| RBM3      | 0.3282       | 0.152666667  | -0.232833333 | 0.0988       |
| DUSP18    | 0.1125       | -0.051       | -0.0869      | 0.039066667  |
| ATRX      | -0.091333333 | 0.059766667  | -0.014       | -0.0972      |
| LOC729903 | -0.131066667 | 0.051533333  | 0.035633333  | -0.0498      |
| FYTTD1    | -0.2587      | -0.0574      | 0.107366667  | -0.176066667 |
| LOC641806 | 0.042566667  | 0.0636       | 0.0787       | -0.098633333 |
| LOC729340 | -0.1851      | -0.004633333 | -0.111133333 | -0.172466667 |
| UBE2W     | 0.027433333  | 0.207566667  | -0.0658      | -0.040733333 |
| GNL2      | 0.229        | 0.020933333  | 0.0284       | 0.108166667  |
| ZC3H15    | 0.0868       | 0.1342       | 0.0379       | 0.0712       |
| ENOX2     | -0.0867      | 0.017666667  | 0.0888       | -0.0153      |
| GTF3A     | -0.073666667 | 0.146866667  | 0.100366667  | -0.023366667 |
| RNGTT     | 0.002133333  | 0.261166667  | 0.151566667  | 0.0373       |
| TAZ       | -0.051466667 | -0.078266667 | -0.067666667 | -0.006833333 |
| WDR43     | 0.2051       | 0.1877       | 0.264166667  | 0.0831       |
| TSFM      | 0.050566667  | 0.172166667  | 0.011233333  | -0.053633333 |
| IQCC      | 0.038566667  | 0.105333333  | 0.051733333  | 0.082066667  |
| ZNF410    | 0.198433333  | -0.0564      | 0.101333333  | 0.040933333  |
| COIL      | 0.043566667  | 0.192466667  | 0.164        | 0.0279       |
| CDK2AP2   | -0.092733333 | 0.1183       | 0.0541       | 0.0045       |
| SLC27A6   | 0.052366667  | -0.0846      | 0.131066667  | -0.043133333 |
| SMC2      | 0.159566667  | 0.034733333  | 0.1242       | 0.055933333  |
| SMG1      | 0.205366667  | -0.113733333 | -0.041666667 | -0.059766667 |
| ANAPC4    | -0.1026      | 0.071066667  | 0.031633333  | -0.078933333 |
| NLN       | -0.042766667 | 0.0208       | -0.172633333 | -0.2829      |
| LOC127295 | 0.0495       | -0.248433333 | 0.061933333  | -0.0458      |
| ICAM3     | 0.219466667  | 0.124133333  | -0.096966667 | 0.005166667  |
| MKI67IP   | 0.214833333  | 0.233066667  | 0.144133333  | 0.2054       |
| MYL12A    | 0.271166667  | 0.084366667  | -0.0418      | 0.0529       |
| AATK      | 0.064633333  | -0.044866667 | -0.021266667 | -0.0605      |
| MAP2K7    | 0.0522       | 0.061166667  | 0.0953       | 0.071166667  |
| LOC340260 | -0.030966667 | 0.035166667  | 0.211666667  | 0.021566667  |
| PDE4B     | 0.5963       | 0.168266667  | -0.2         | -0.031266667 |
| SLC5A10   | -0.000666667 | 0.037666667  | 0.0338       | -0.170366667 |
| PYCRL     | 0.1419       | 0.0775       | 0.0822       | 0.035366667  |
| FANCE     | 0.0696       | 0.069333333  | 0.082133333  | -0.022366667 |
| EMP1      | 0.0494       | 0.098033333  | 0.034133333  | -0.0333      |
| PLCE1     | 0.028266667  | 0.058033333  | 0.069333333  | -0.0195      |
| C17orf71  | -0.034833333 | 0.060666667  | 0.161066667  | 0.076133333  |
| NUMA1     | 0.107        | -0.008966667 | -0.128733333 | -0.138266667 |
| SOCS6     | -0.0754      | 0.104166667  | -0.033266667 | 0.014466667  |
| LOC649553 | -0.1002      | -0.210633333 | 0.0227       | -0.2961      |
| MRPS35    | 0.150733333  | 0.056033333  | -0.071366667 | 0.030966667  |
| NAF1      | 0.088766667  | 0.074833333  | 0.055933333  | 0.102666667  |

|              |              |              |              |              |
|--------------|--------------|--------------|--------------|--------------|
| CTDSPL2      | 0.1194       | 0.088        | 0.002433333  | -0.0962      |
| USP7         | 0.1971       | 0.1082       | 0.1235       | 0.070133333  |
| LOC389873    | 0.1533       | 0.008833333  | 0.0307       | -0.0028      |
| LOC732425    | 0.1331       | 0.0428       | -0.0194      | 0.008333333  |
| KLHL36       | 0.124033333  | 0.059666667  | -0.0609      | -0.0136      |
| PPIH         | 0.2443       | 0.176533333  | -0.1118      | 0.0581       |
| LOC642377    | 0.1003       | -0.009533333 | 0.047966667  | -0.077633333 |
| LOC100133600 | 0.041366667  | -0.1462      | 0.042333333  | -0.0402      |
| LOC648729    | 0.034233333  | -0.070833333 | 0.044166667  | -0.025466667 |
| CNIH4        | 0.034366667  | 0.1041       | -0.0212      | 0.0074       |
| ATP2B4       | -0.042866667 | 0.0334       | -0.164433333 | -0.2205      |
| ZNF512B      | 0.077766667  | 0.0089       | 0.017566667  | -0.077766667 |
| LOC646808    | 0.0564       | -0.123233333 | 0.105633333  | -0.119333333 |
| XIST         | 0.1224       | -0.097233333 | 0.009033333  | -0.030533333 |
| MRPS22       | 0.1364       | 0.098033333  | -0.044933333 | 0.081766667  |
| AHCYL1       | -0.3059      | -0.161366667 | -0.040033333 | -0.401566667 |
| MVD          | -0.0572      | 0.0562       | 0.076133333  | -0.099533333 |
| FLJ10996     | 0.115166667  | 0.180166667  | 0.122133333  | 0.1426       |
| TAPT1        | -0.176333333 | 0.209366667  | 0.021566667  | -0.105433333 |
| MAGEL2       | 0.046233333  | -0.007333333 | 0.101933333  | 0.062833333  |
| OR51B4       | 0.111233333  | -0.006133333 | 0.084933333  | -0.020833333 |
| HPS1         | 0.011166667  | 0.144433333  | 0.191        | 0.0572       |
| ADIPOR1      | -0.093866667 | 0.050533333  | 0.096566667  | -0.115633333 |
| LOC646135    | 0.079033333  | -0.173933333 | 0.036833333  | 0.140033333  |
| NOC2L        | 0.342133333  | 0.135166667  | 0.045966667  | 0.155733333  |
| PWP1         | 0.218733333  | 0.0632       | 0.007966667  | 0.008333333  |
| PTDSS2       | -0.256533333 | 0.003033333  | 0.043966667  | -0.181466667 |
| LOC100130131 | 0.0338       | 0.091533333  | 0.227466667  | 0.120633333  |
| PHC3         | 0.174466667  | 0.0716       | 0.016766667  | -0.050966667 |
| POLR3H       | 0.048433333  | 0.027533333  | 0.013566667  | 0.077433333  |
| UBXN4        | 0.001666667  | -0.167966667 | -0.0973      | -0.2219      |
| YWHAQ        | 0.131833333  | 0.061233333  | -0.0191      | -0.019733333 |
| C4orf23      | -0.016666667 | -0.1441      | 0.046233333  | -0.1986      |
| STX5         | 0.198833333  | 0.078833333  | -0.297       | -0.043366667 |
| AHSA1        | 0.1329       | 0.259666667  | 0.078833333  | 0.082666667  |
| TDG          | 0.470766667  | 0.222966667  | 0.242433333  | 0.319766667  |
| CEP72        | 0.0947       | 0.183866667  | 0.009966667  | -0.086466667 |
| LOC402342    | -0.258266667 | 0.0272       | -0.111433333 | -0.228866667 |
| ZNF490       | -0.1227      | 0.019666667  | -0.114       | -0.144333333 |
| C9orf130     | -0.130766667 | 0.225        | -0.066466667 | -0.215766667 |
| C4orf41      | -0.108666667 | 0.023566667  | -0.0336      | -0.088466667 |
| FAM165B      | -0.0109      | -0.0157      | 0.021566667  | -0.204133333 |
| ZNF707       | 0.175566667  | 0.114533333  | -0.1211      | -0.005533333 |
| LOC441150    | -0.218       | -0.046133333 | -0.0888      | -0.1217      |
| CSNK1G2      | 0.047033333  | 0.0482       | 0.12         | 0.0399       |
| MUTYH        | -0.178066667 | 0.149133333  | 0.006633333  | -0.1032      |
| KLHL20       | -0.030566667 | 0.050333333  | 0.0333       | -0.033566667 |



|              |              |              |              |              |
|--------------|--------------|--------------|--------------|--------------|
| LOC100131017 | 0.1084       | 0.237166667  | -0.019566667 | 0.085133333  |
| EDEM2        | -0.0873      | -0.114966667 | -0.012466667 | -0.211766667 |
| ZNF213       | -0.0587      | -0.037       | -0.104833333 | -0.157733333 |
| TIGD1        | 0.137066667  | 0.175966667  | 0.0668       | 0.0875       |
| FIG4         | -0.190833333 | -0.070133333 | 0.096033333  | -0.157666667 |
| ENAH         | 0.110833333  | 0.0514       | -0.014633333 | -0.0846      |
| PACS1        | 0.218166667  | 0.086933333  | -0.133233333 | -0.162066667 |
| GAPDH        | 0.137833333  | 0.216566667  | 0.061833333  | 0.089666667  |
| KIAA0355     | 0.1144       | -0.0111      | -0.0403      | -0.097233333 |
| MYST2        | -0.0028      | -0.0306      | 0.008033333  | -0.162666667 |
| LOC728553    | 0.0373       | -0.165266667 | -0.056633333 | -0.2187      |
| VTI1B        | -0.107866667 | -0.0291      | -0.0729      | -0.199433333 |
| PDHB         | 0.126733333  | -0.097766667 | -0.0798      | -0.038133333 |
| ARPP19       | -0.0055      | 0.026033333  | 0.1372       | 0.118366667  |
| NAGK         | -0.157633333 | 0.041966667  | 0.0315       | -0.047433333 |
| SLC25A39     | -0.089033333 | 0.024166667  | 0.0176       | -0.1451      |
| SNORD104     | 0.029266667  | 0.023733333  | 0.058233333  | 0.014633333  |
| MRPL51       | 0.1296       | 0.1232       | 0.0033       | -0.0396      |
| LOC391655    | -0.2768      | 0.143233333  | -0.2981      | -0.351466667 |
| AURKAPS1     | 0.0599       | 0.025633333  | -0.0618      | -0.0011      |
| FAM101B      | -0.0438      | 0.025066667  | 0.108666667  | 0.061866667  |
| FOXM1        | 0.1212       | 0.0553       | 0.080533333  | 0.038166667  |
| SPHK2        | -0.1143      | -0.239433333 | 0.051533333  | -0.155633333 |
| SPPL3        | -0.040666667 | -0.041566667 | 0.0835       | -0.1614      |
| LOC644684    | 0.1303       | 0.055566667  | 0.0411       | 0.053333333  |
| PLK4         | 0.1501       | 0.139966667  | 0.053066667  | 0.049933333  |
| LOC100133398 | 0.191933333  | 0.2205       | 0.131533333  | 0.171333333  |
| PRMT1        | 0.260433333  | 0.083833333  | 0.210033333  | -0.041466667 |
| C4orf33      | -0.1138      | -0.152966667 | 0.058833333  | -0.145       |
| LOC652470    | 0.062733333  | -0.185566667 | -0.061933333 | -0.0994      |
| C19orf6      | -0.0782      | 0.0641       | 0.000366667  | -0.017566667 |
| LOC151457    | 0.078666667  | 0.2278       | -0.106266667 | 0.007066667  |
| GMNN         | 0.044633333  | 0.195666667  | 0.099066667  | -0.053966667 |
| CSTF1        | 0.192166667  | -0.0001      | 0.0822       | 0.0541       |
| LOC653752    | 0.076466667  | -0.011566667 | 0.005433333  | -0.099466667 |
| UGT1A3       | 0.043133333  | -0.0665      | 0.111466667  | -0.1598      |
| FLJ37396     | -0.180766667 | -0.003766667 | -0.0058      | -0.385033333 |
| LOC644928    | 0.081833333  | 0.106633333  | 0.148166667  | 0.1457       |
| NDUFB4       | -0.152133333 | 0.1382       | 0.080466667  | -0.010766667 |
| LOC646294    | -0.1195      | -0.048766667 | -0.007333333 | -0.167133333 |
| REL          | -0.144233333 | 0.102366667  | 0.0674       | -0.031033333 |
| USP39        | 0.0002       | 0.163866667  | -0.070166667 | -0.0664      |
| ARL13B       | 0.202733333  | 0.4109       | 0.0539       | 0.192133333  |
| COPS7A       | -0.0954      | -0.048933333 | 0.045533333  | -0.1255      |
| DYM          | -0.040433333 | -0.052133333 | -0.042166667 | -0.145433333 |
| CREBZF       | 0.034366667  | -0.029833333 | 0.0018       | -0.057833333 |
| CDC34        | 0.209        | 0.078966667  | 0.026466667  | 0.054366667  |

|              |              |              |              |              |
|--------------|--------------|--------------|--------------|--------------|
| LOC728937    | 0.0917       | 0.062633333  | 0.0602       | 0.021433333  |
| LOC100130289 | -0.0242      | 0.341466667  | -0.120766667 | -0.119333333 |
| LOC100133224 | -0.149033333 | 0.0217       | 0.0018       | -0.201833333 |
| MDM4         | 0.161433333  | 0.021        | -0.145866667 | -0.054466667 |
| CORO1A       | 0.11         | 0.1612       | -0.007433333 | -0.069033333 |
| TEX264       | -0.1373      | -0.095833333 | 0.0645       | -0.043566667 |
| RALGDS       | -0.087266667 | -0.096966667 | -0.186333333 | -0.243966667 |
| LOC731007    | 0.165966667  | 0.121333333  | 0.150633333  | -0.0617      |
| ZNF470       | -0.047033333 | 0.132066667  | 0.048333333  | 0.022433333  |
| PFDN2        | 0.1462       | 0.0335       | 0.075566667  | 0.233        |
| RANGAP1      | 0.089866667  | 0.087233333  | 0.163933333  | -0.063       |
| KPNA6        | 0.177566667  | 0.044733333  | -0.063833333 | -0.068266667 |
| MIR488       | -0.026066667 | -0.0702      | 0.121066667  | -0.080633333 |
| CARD14       | 0.053333333  | -0.1218      | 0.145333333  | 0.092733333  |
| HOXC8        | 0.307466667  | 0.034866667  | 0.045966667  | 0.0926       |
| BBS1         | -0.1108      | -0.0541      | -0.136366667 | -0.085433333 |
| WDR57        | 0.073066667  | 0.183766667  | -0.024533333 | 0.147233333  |
| PHYH         | -0.2083      | -0.1111      | -0.105533333 | -0.212266667 |
| SNRNP70      | 0.0149       | 0.2513       | 0.106466667  | -0.0848      |
| CDC14B       | -0.0289      | -0.0768      | -0.0356      | -0.101133333 |
| LOC441550    | -0.2441      | 0.0495       | -0.202433333 | -0.375233333 |
| FKRP         | 0.1178       | 0.102133333  | 0.010233333  | 0.1244       |
| SLC20A2      | 0.178866667  | 0.168233333  | 0.152566667  | 0.259233333  |
| TXNDC17      | 0.208666667  | 0.098733333  | -0.019466667 | -0.007833333 |
| BRWD1        | -0.063266667 | -0.076133333 | 0.0494       | -0.068166667 |
| DHFRL1       | -0.087566667 | 0.0796       | 0.075666667  | -0.109066667 |
| ANKRD7       | -0.0739      | 0.013066667  | 0.0417       | -0.139566667 |
| KIAA0146     | -0.128333333 | 0.0474       | 0.062633333  | -0.131033333 |
| LOC401321    | -0.029033333 | -0.0377      | 0.005766667  | 0.0109       |
| LOC137107    | -0.155033333 | 0.119066667  | -0.144       | -0.2287      |
| ACLY         | 0.456666667  | 0.040433333  | 0.157366667  | 0.2716       |
| MEAF6        | 0.097        | 0.074766667  | 0.0348       | 0.065866667  |
| SNRNP27      | 0.324966667  | -0.037433333 | 0.0441       | 0.043266667  |
| NRBP1        | 0.144866667  | 0.0486       | 0.057566667  | 0.130066667  |
| RPP38        | -0.031166667 | 0.159933333  | -0.020233333 | -0.0557      |
| PSMD5        | 0.074533333  | 0.0162       | 0.016066667  | -0.034266667 |
| AMOTL2       | 0.247966667  | -0.152333333 | 0.056033333  | 0.092666667  |
| EBNA1BP2     | 0.252233333  | 0.281666667  | -0.025933333 | 0.0461       |
| LOC100129342 | 0.038866667  | 0.1132       | 0.049966667  | -0.0602      |
| LOC100128994 | 0.0029       | -0.0849      | 0.0932       | -0.1168      |
| SULT1A2      | 0.045        | -0.001633333 | -0.036233333 | -0.092666667 |
| DUSP22       | -0.345833333 | -0.152366667 | 0.1707       | -0.159       |
| ZNF232       | 0.040533333  | 0.029466667  | 0.024333333  | 0.0602       |
| LOC644404    | -0.019466667 | -0.039466667 | 0.103633333  | -0.191       |
| SLC22A17     | -0.079433333 | -0.006033333 | -0.072       | -0.0731      |
| DDX11        | -0.049766667 | 0.158433333  | 0.2121       | -0.004866667 |
| MTRF1        | 0.0425       | 0.016766667  | -0.0072      | -0.019533333 |

|              |              |              |              |              |
|--------------|--------------|--------------|--------------|--------------|
| FANCI        | 0.090266667  | -0.003166667 | 0.1717       | 0.112733333  |
| DPY30        | 0.120666667  | 0.279066667  | 0.1412       | -0.005033333 |
| RBBP8        | 0.081966667  | 0.2283       | 0.101366667  | 0.0745       |
| LOC645289    | -0.2992      | 0.1002       | -0.299066667 | -0.434       |
| TSEN15       | -0.037666667 | 0.149466667  | -0.0745      | -0.138766667 |
| FCGR3A       | 0.032033333  | 0.121733333  | 0.1751       | -0.0145      |
| LOC554206    | -0.001033333 | -0.1208      | -0.055433333 | -0.2325      |
| PHTF2        | 0.238833333  | 0.060666667  | 0.1831       | 0.0844       |
| LOC729708    | 0.140866667  | 0.1691       | 0.0231       | 0.087633333  |
| CLUAP1       | -0.0377      | 0.027966667  | -0.1096      | -0.148566667 |
| PDCD11       | 0.237266667  | -0.0568      | 0.0281       | 0.006966667  |
| SFXN3        | 0.023066667  | 0.0357       | -0.0853      | -0.1086      |
| POGZ         | 0.069266667  | -0.0016      | 0.067766667  | -0.048266667 |
| TFCP2        | 0.078433333  | 0.068933333  | -0.0117      | 0.023766667  |
| TRAF3        | 0.024033333  | 0.2782       | 0.2257       | 0.107933333  |
| FLJ20628     | -0.145233333 | 0.1886       | 0.0265       | -0.028433333 |
| SPIRE2       | -0.061466667 | 0.0456       | -0.0397      | -0.119366667 |
| HAX1         | -0.2953      | 0.001933333  | 0.051        | -0.232233333 |
| WDR35        | 0.123566667  | 0.005766667  | -0.004       | -0.112833333 |
| LOC572558    | 0.1609       | 0.0109       | 0.272266667  | 0.111966667  |
| PGK1         | 0.207233333  | 0.198733333  | -0.021733333 | -0.0066      |
| HNRNPM       | 0.3317       | 0.149033333  | 0.106066667  | 0.221233333  |
| C11orf73     | -0.216933333 | -0.0175      | -0.203166667 | -0.3121      |
| PPHLN1       | 0.0237       | 0.139066667  | 0.100133333  | -0.028533333 |
| TBC1D10A     | 0.122933333  | 0.132366667  | 0.2689       | 0.1545       |
| LOC729617    | 0.0647       | 0.004133333  | 0.096266667  | 0.005366667  |
| MYCBP2       | -0.053933333 | 0.077566667  | 0.006333333  | -0.1331      |
| KHDRBS1      | 0.149766667  | 0.056566667  | -0.001866667 | -0.005666667 |
| LSM10        | -0.003366667 | 0.125666667  | 0.1679       | 0.065966667  |
| FAM98C       | -0.0665      | 0.000933333  | 0.160866667  | -0.109033333 |
| RTN2         | -0.077133333 | -0.1169      | -0.0066      | -0.199533333 |
| MORC3        | 0.130333333  | -0.052333333 | 0.003633333  | -0.052766667 |
| PAPD1        | 0.005333333  | 0.119133333  | 0.2355       | -0.0148      |
| LOC389223    | -0.016933333 | 0.078833333  | 0.0644       | 0.021866667  |
| NOV          | -0.018966667 | 0.016066667  | -0.521866667 | -0.209866667 |
| ELF2         | -0.011633333 | -0.049633333 | 0.012833333  | -0.121733333 |
| ZNF282       | 0.061766667  | 0.0834       | 0.023566667  | 0.034033333  |
| LIN52        | 0.0006       | 0.056433333  | 0.248066667  | 0.041933333  |
| KIAA0408     | -0.005933333 | 0.432166667  | 0.002533333  | 0.035833333  |
| NCDN         | 0.022333333  | 0.0904       | -0.136066667 | -0.1513      |
| KIAA0133     | 0.080433333  | 0.239666667  | 0.133366667  | 0.0648       |
| GAS8         | 0.071733333  | -0.0644      | -0.035333333 | -0.040633333 |
| LOC440311    | -0.096966667 | -0.038833333 | -0.113066667 | -0.123266667 |
| LOC100129269 | 0.104733333  | 0.189066667  | 0.315466667  | 0.059933333  |
| C13orf27     | 0.388833333  | 0.3939       | 0.044366667  | 0.2108       |
| FAM63B       | -0.082333333 | 0.116733333  | 0.022266667  | -0.251666667 |
| LOC440589    | 0.059266667  | 0.007266667  | 0.013233333  | -0.105933333 |

|              |              |              |              |              |
|--------------|--------------|--------------|--------------|--------------|
| RBM16        | 0.061566667  | -0.016833333 | 0.004433333  | -0.066766667 |
| RPS12        | -0.0017      | 0.002766667  | 0.094166667  | -0.0294      |
| GSPT2        | 0.035433333  | 0.032033333  | -0.117866667 | 0.019133333  |
| TSNAX        | -0.1797      | -0.009133333 | -0.126166667 | -0.115333333 |
| THBS3        | -0.164833333 | -0.028933333 | -0.027966667 | -0.208533333 |
| RP2          | 0.316233333  | 0.027266667  | -0.0427      | 0.063933333  |
| ZC3H14       | 0.1542       | -0.030566667 | -0.0165      | -0.018633333 |
| KDELC1       | 0.321933333  | 0.201333333  | -0.0271      | 0.090433333  |
| DHRS7        | -0.098       | -0.020933333 | 0.205266667  | 0.0465       |
| LOC729941    | -0.006666667 | 0.003466667  | -0.025366667 | -0.109       |
| L3MBTL2      | -0.2542      | 0.055533333  | 0.174133333  | 0.013666667  |
| VPS33A       | 0.0449       | 0.071133333  | 0.018166667  | -0.043866667 |
| RPL22        | -0.049633333 | -0.1391      | 0.073466667  | -0.115666667 |
| B4GALNT4     | 0.181833333  | 0.181933333  | -0.005066667 | 0.153766667  |
| C12orf76     | -0.087866667 | -0.1555      | -0.092966667 | -0.136066667 |
| UFC1         | -0.072766667 | -0.118166667 | -0.082133333 | -0.048933333 |
| GTPBP4       | 0.4805       | 0.407033333  | 0.1768       | 0.282366667  |
| HNRNPH2      | 0.020266667  | -0.058466667 | -0.062733333 | -0.068866667 |
| LOC100128016 | 0.154866667  | 0.094233333  | 0.008233333  | 0.034433333  |
| ZMYM2        | 0.026366667  | -0.1196      | 0.051966667  | -0.1682      |
| GPKOW        | 0.2576       | 0.075166667  | -0.0169      | 0.1967       |
| VPS54        | 0.0218       | 0.035266667  | 0.015233333  | -0.0899      |
| LOC100130921 | 0.2029       | 0.242133333  | 0.1779       | 0.230866667  |
| YIPF2        | -0.1137      | -0.176066667 | 0.0361       | -0.137666667 |
| TRAPPC3      | -0.012066667 | 0.0508       | -0.008766667 | 0.139633333  |
| SARS         | -0.271866667 | -0.343866667 | -0.226766667 | -0.284966667 |
| LOC100128627 | 0.283733333  | 0.067333333  | 0.0019       | 0.061133333  |
| LAS1L        | 0.121666667  | 0.1187       | 0.105933333  | 0.0031       |
| PLEKHA3      | 0.412433333  | 0.028666667  | -0.081933333 | 0.047        |
| ASPSCR1      | -0.2123      | -0.110866667 | -0.020066667 | -0.164266667 |
| ZNF43        | -0.0312      | 0.110633333  | 0.0372       | -0.1426      |
| TXNDC9       | 0.172233333  | -0.000333333 | -0.001566667 | 0.004933333  |
| MPV17        | -0.233833333 | -0.105833333 | 0.0609       | -0.099866667 |
| ELP2         | 0.007166667  | -0.135766667 | -0.100933333 | -0.115866667 |
| ARMC8        | 0.0937       | 0.044133333  | 0.136066667  | 0.0439       |
| TEX9         | 0.1408       | 0.097833333  | -0.0693      | 0.025666667  |
| C7orf41      | -0.493833333 | -0.1905      | -0.010866667 | -0.472466667 |
| PIGX         | 0.007766667  | 0.1181       | 0.096466667  | -0.055166667 |
| LOC648059    | -0.099166667 | 0.259733333  | 0.093666667  | -0.139       |
| LOC644191    | 0.1619       | 0.016633333  | 0.0912       | 0.0426       |
| FCAR         | 0.092566667  | 0.397633333  | 0.1454       | 0.023833333  |
| BTN3A3       | -0.1818      | -0.076966667 | -0.052733333 | -0.180766667 |
| GSPT1        | 0.198666667  | 0.2206       | 0.076        | 0.0528       |
| NONO         | -0.090366667 | 0.090666667  | 0.0248       | -0.0883      |
| GPATCH3      | 0.1177       | -0.169233333 | -0.113466667 | -0.1077      |
| SH3D19       | 0.003666667  | 0.112633333  | -0.0301      | 0.010833333  |
| C8orf58      | 0.305466667  | 0.056633333  | -0.009166667 | 0.0846       |

|              |              |              |              |              |
|--------------|--------------|--------------|--------------|--------------|
| YES1         | 0.029333333  | 0.005733333  | 0.166033333  | -0.051033333 |
| EYS          | -0.032766667 | 0.0788       | 0.009666667  | 0.057266667  |
| ELP3         | 0.0134       | 0.097833333  | -0.0428      | -0.0366      |
| LOC650254    | 0.088366667  | 0.103433333  | -0.0312      | -0.0113      |
| PSIP1        | -0.213933333 | -0.3301      | 0.149666667  | -0.1817      |
| SLC6A10P     | -0.343866667 | -0.118633333 | -0.083733333 | -0.1922      |
| ZNF219       | -0.007533333 | -0.1842      | -0.094066667 | -0.32        |
| PPM1G        | 0.139833333  | 0.058466667  | 0.2278       | 0.089266667  |
| MPG          | -0.150233333 | 0.1058       | 0.129266667  | -0.089566667 |
| SLC15A4      | 0.090366667  | -0.0437      | 0.1032       | -0.052533333 |
| BTBD6        | 0.078033333  | -0.094266667 | 0.007133333  | -0.087566667 |
| C21orf57     | -0.1101      | 0.096066667  | -0.114033333 | -0.075433333 |
| C14orf174    | 0.051366667  | -0.079533333 | 0.040933333  | -0.0138      |
| LOC644424    | -0.025566667 | -0.029933333 | 0.081066667  | -0.112233333 |
| LOC646674    | -0.004333333 | 0.0369       | -0.037466667 | -0.102066667 |
| LOC387647    | 0.050733333  | 0.277133333  | 0.076033333  | 0.0505       |
| FAM90A3      | 0.178933333  | -0.050733333 | 0.044966667  | 0.062566667  |
| CD164        | -0.2253      | -0.070033333 | -0.149966667 | -0.309       |
| ACCS         | -0.562566667 | -0.2654      | 0.047033333  | -0.386833333 |
| ABHD10       | -0.032566667 | 0.171133333  | 0.0147       | -0.208733333 |
| RPL31        | 0.036333333  | 0.053666667  | -0.055266667 | -0.0494      |
| AMY1A        | -0.0253      | -0.005733333 | -0.3285      | -0.2311      |
| XRCC6BP1     | 0.102533333  | 0.145433333  | 0.057366667  | 0.078266667  |
| LOC729404    | -0.064566667 | -0.119066667 | 0.1145       | -0.055466667 |
| RASSF6       | -0.162733333 | 0.4594       | 0.060033333  | -0.104866667 |
| ZNF654       | 0.1799       | 0.0603       | 0.0149       | -0.051233333 |
| DDR2         | -0.271533333 | -0.202666667 | -0.294133333 | -0.4504      |
| PSPH         | -0.051866667 | 0.004033333  | -0.069166667 | -0.1789      |
| GNS          | -0.199466667 | -0.153266667 | 0.093333333  | -0.1734      |
| NDUFC1       | -0.011166667 | 0.043833333  | 0.109066667  | 0.007133333  |
| LOC728518    | -0.076933333 | 0.169466667  | 0.253933333  | -0.0671      |
| LOC646330    | -0.010966667 | 0.0294       | 0.061133333  | -0.0232      |
| LOC100134011 | 0.156866667  | 0.104433333  | 0.047633333  | 0.069266667  |
| LOC648740    | -0.2924      | 0.149966667  | -0.531266667 | -0.408166667 |
| ALDH7A1      | -0.118866667 | -0.1608      | 0.110433333  | -0.2198      |
| ALPK1        | -0.219533333 | -0.108866667 | -0.045833333 | -0.326533333 |
| BUD13        | 0.164433333  | 0.075466667  | 0.1418       | 0.1188       |
| KIAA1602     | -0.083166667 | 0.0405       | -0.0451      | -0.157333333 |
| AGFG2        | 0.137366667  | 0.1683       | -0.011766667 | -0.0003      |
| SNRNP40      | 0.1802       | 0.2585       | 0.005433333  | 0.014533333  |
| FXR1         | 0.095966667  | -0.092466667 | 0.0099       | -0.115966667 |
| LOC653171    | 0.216833333  | 0.026        | 0.1755       | 0.0982       |
| HMGB1L1      | 0.1934       | 0.337        | -0.108       | -0.098966667 |
| JOSD1        | 0.072766667  | -0.0225      | 0.035066667  | -0.0695      |
| FAM108A3     | 0.037966667  | -0.075566667 | 0.1507       | -0.1017      |
| CLDND1       | 0.065766667  | 0.1499       | 0.2424       | 0.129566667  |
| LOC728734    | 0.044866667  | -0.152733333 | -0.166       | -0.182533333 |

|              |              |              |              |              |
|--------------|--------------|--------------|--------------|--------------|
| BAK1         | 0.070633333  | 0.0818       | 0.301033333  | 0.101866667  |
| TMPRSS12     | 0.2303       | -0.0278      | 0.258033333  | 0.2907       |
| SGTA         | 0.1123       | 0.2194       | -0.007566667 | 0.072        |
| CCDC14       | 0.0652       | 0.067066667  | 0.1404       | -0.045166667 |
| SMARCD3      | 0.003866667  | -0.0303      | 0.029766667  | -0.031033333 |
| MTFMT        | 0.068666667  | 0.089033333  | 0.264133333  | -0.0552      |
| SH2B1        | -0.041533333 | -0.021533333 | 0.048166667  | -0.0427      |
| RPS6P1       | -0.0792      | -0.0772      | 0.043033333  | -0.195333333 |
| CXorf56      | 0.176466667  | -0.044033333 | -0.0323      | -0.056533333 |
| KIAA1967     | 0.360266667  | 0.1299       | -0.1161      | 0.0509       |
| LOC644988    | -0.140866667 | -0.017233333 | 0.1728       | -0.025966667 |
| ICMT         | 0.064333333  | 0.134933333  | 0.105166667  | 0.003833333  |
| ACTG1        | 0.241866667  | -0.093166667 | -0.042866667 | -0.0209      |
| SETD4        | 0.1377       | 0.113766667  | 0.048766667  | 0.094633333  |
| SH3BGR       | 0.0192       | -0.041466667 | 0.071233333  | -0.114633333 |
| NAT12        | 0.209733333  | 0.085333333  | -0.0204      | 0.1478       |
| RPL22L1      | 0.201066667  | 0.030466667  | 0.0309       | 0.0649       |
| LMNB2        | 0.2892       | 0.173        | 0.0734       | 0.098633333  |
| MDFIC        | 0.052766667  | -0.087266667 | 0.0386       | -0.125933333 |
| IGF2BP2      | 0.435566667  | 0.658166667  | 0.283933333  | 0.2415       |
| GOLGB1       | -0.075433333 | -0.010633333 | -0.145466667 | -0.209666667 |
| CRAMP1L      | 0.0654       | 0.121533333  | -0.005933333 | -0.046033333 |
| LOC653604    | 0.0976       | 0.103033333  | 0.162166667  | 0.071833333  |
| SP4          | 0.002766667  | 0.026366667  | 0.224533333  | 0.0358       |
| C18orf8      | 0.213133333  | 0.176466667  | 0.218        | 0.184333333  |
| DDX31        | 0.249366667  | 0.309266667  | 0.1562       | 0.230066667  |
| IQCB1        | 0.161533333  | 0.0738       | 0.0899       | 0.058466667  |
| LOC100129282 | 0.1468       | 0.046633333  | -0.0078      | 0.013233333  |
| SCARNA10     | 0.2989       | 0.148733333  | 0.268966667  | 0.368366667  |
| OCEL1        | -0.237       | -0.090933333 | -0.017566667 | -0.260933333 |
| LRRC28       | -0.153233333 | -0.073933333 | 0.118333333  | -0.096533333 |
| FRRS1        | 0.0249       | -0.030333333 | 0.153433333  | 0.013066667  |
| LOC644949    | -0.1696      | 0.370633333  | -0.218733333 | -0.2211      |
| LOC100133328 | 0.141566667  | 0.1205       | 0.2206       | 0.221266667  |
| VTA1         | 0.206        | 0.1741       | 0.133933333  | 0.079866667  |
| RPUSD1       | 0.1911       | 0.164166667  | 0.0403       | 0.213366667  |
| PRKCABP      | -0.0399      | 0.004866667  | 0.171233333  | -0.100533333 |
| XYLB         | -0.105033333 | 0.213766667  | 0.032833333  | -0.0424      |
| C17orf85     | 0.2215       | 0.220666667  | 0.017833333  | 0.080366667  |
| E2F1         | 0.077933333  | 0.045066667  | 0.047833333  | -0.104166667 |
| ANKRD41      | 0.100866667  | 0.1097       | 0.003233333  | 0.000966667  |
| DDB2         | 0.288066667  | 0.058266667  | -0.010366667 | 0.073133333  |
| NARFL        | 0.025        | -0.0195      | -0.075566667 | -0.0812      |
| N-PAC        | 0.088066667  | 0.079633333  | 0.0577       | -0.0751      |
| ARPC2        | 0.209633333  | 0.261166667  | 0.035533333  | 0.0991       |
| MFF          | -0.113766667 | 0.034366667  | 0.094366667  | -0.084533333 |
| ZNF182       | -0.0118      | 0.023166667  | 0.133933333  | -0.012266667 |

|              |              |              |              |              |
|--------------|--------------|--------------|--------------|--------------|
| NME4         | -0.005066667 | -0.002066667 | 0.0882       | -0.142466667 |
| C1orf43      | -0.1203      | -0.1034      | -0.0711      | -0.099933333 |
| TRIM35       | 0.0647       | 0.0553       | -0.1924      | -0.142166667 |
| MCM7         | 0.1235       | 0.1217       | 0.122066667  | 0.0679       |
| RPS3A        | 0.009833333  | 0.003466667  | 0.160333333  | -0.025433333 |
| PPP2R3B      | 0.009133333  | 0.124533333  | 0.072966667  | 0.083466667  |
| GLMN         | 0.1931       | 0.012233333  | 0.175066667  | 0.194366667  |
| CASD1        | -0.099533333 | 0.062233333  | -0.003866667 | -0.007833333 |
| PLD3         | -0.170733333 | -0.064733333 | 0.094266667  | -0.097266667 |
| GNAI3        | 0.159566667  | 0.0471       | 0.2045       | 0.024        |
| RANBP3       | 0.042433333  | -0.016133333 | 0.309        | 0.0549       |
| RPS25        | 0.054233333  | 0.0079       | 0.045066667  | -0.109933333 |
| XKR6         | 0.0944       | -0.019733333 | -0.0233      | -0.0725      |
| EID2         | 0.080766667  | 0.1155       | -0.0344      | 0.002        |
| NMD3         | 0.052933333  | 0.141633333  | 0.088833333  | -0.0705      |
| USP41        | -0.006966667 | 0.0409       | 0.0331       | -0.0679      |
| SPAG5        | 0.318066667  | -0.0153      | 0.074033333  | 0.036966667  |
| MAGOH        | 0.320933333  | 0.162766667  | -0.004266667 | 0.2028       |
| FARSLB       | 0.016066667  | 0.052566667  | 0.111433333  | -0.1172      |
| TBX18        | 0.002066667  | -0.182033333 | -0.068233333 | -0.0861      |
| GIT2         | 0.192966667  | 0.071733333  | 0.051033333  | 0.0553       |
| MEX3A        | 0.0934       | -0.0154      | 0.108166667  | -0.081333333 |
| MAGEC2       | -0.011533333 | 0.0806       | 0.1282       | 0.011366667  |
| ALKBH1       | 0.201466667  | 0.0363       | 0.031466667  | 0.0797       |
| RSBN1L       | -0.012766667 | 0.1002       | 0.0131       | 0.002433333  |
| CCDC85B      | -0.2651      | -0.032233333 | 0.3054       | -0.196966667 |
| CDC42        | 0.3192       | 0.084266667  | 0.0978       | 0.0766       |
| LOC100131530 | 0.077066667  | 0.071433333  | 0.0615       | 0.074633333  |
| FAM189B      | -0.108933333 | -0.039566667 | 0.139        | -0.128633333 |
| LOC100130190 | 0.262866667  | 0.077166667  | 0.177466667  | 0.105133333  |
| LOC653590    | 0.132866667  | -0.073666667 | 0.072566667  | 0.0416       |
| KIFC2        | -0.189433333 | -0.026066667 | -0.239233333 | -0.2832      |
| MIER2        | 0.1122       | 0.190633333  | 0.123966667  | 0.116466667  |
| BAT3         | -0.0752      | 0.092666667  | -0.0535      | -0.147933333 |
| COX15        | -0.048133333 | -0.1062      | 0.156        | -0.037866667 |
| CSHL1        | -0.037666667 | -0.0072      | -0.022766667 | -0.135066667 |
| LOC642458    | 0.081033333  | 0.105366667  | 0.047333333  | -0.065666667 |
| MYOM2        | -0.273466667 | -0.054066667 | -0.059366667 | -0.227966667 |
| GTF2A1       | 0.068766667  | 0.082266667  | 0.124433333  | 0.208233333  |
| LOC729832    | 0.196366667  | 0.04         | 0.133666667  | 0.0851       |
| FUT6         | 0.030233333  | 0.326233333  | 0.050333333  | -0.006333333 |
| MECP2        | -0.0572      | 0.137666667  | -0.061733333 | -0.170833333 |
| LOC347376    | -0.206766667 | 0.2634       | -0.020833333 | -0.275266667 |
| PHF10        | 0.1799       | 0.108766667  | 0.164        | 0.081966667  |
| TADA2A       | 0.0832       | 0.164866667  | 0.234333333  | -0.001433333 |
| LOC100133478 | 0.087533333  | -0.073433333 | 0.077566667  | -0.065633333 |
| FAM104B      | -0.0513      | 0.067833333  | 0.173233333  | 0.029833333  |

|              |              |              |              |              |
|--------------|--------------|--------------|--------------|--------------|
| LOC727761    | 0.181666667  | 0.2081       | 0.0643       | -0.012666667 |
| AURKB        | 0.221133333  | 0.134833333  | 0.050733333  | 0.1796       |
| TTC26        | 0.1529       | 0.0641       | 0.0232       | 0.016566667  |
| C6orf191     | -0.0041      | 0.192966667  | 0.052466667  | 0.0074       |
| DUSP28       | -0.166533333 | -0.093866667 | 0.037466667  | -0.2058      |
| C17orf80     | 0.0919       | 0.017733333  | 0.045566667  | -0.0223      |
| BTD          | 0.014766667  | 0.0536       | 0.044766667  | 0.070433333  |
| ZNF652       | 0.004333333  | 0.136833333  | 0.15         | -0.002866667 |
| RPS26P11     | 0.0023       | 0.147166667  | 0.078466667  | -0.0111      |
| HUS1B        | 0.277066667  | -0.005566667 | 0.099533333  | 0.1131       |
| PHIP         | -0.110433333 | 0.123166667  | 0.1424       | -0.1623      |
| LOC100131009 | 0.205866667  | 0.0526       | -0.0033      | -0.1037      |
| YPEL3        | -0.091       | -0.1538      | -0.118666667 | -0.3649      |
| LOC388524    | 0.0277       | 0.0777       | 0.083866667  | -0.049533333 |
| MAPK8IP3     | 0.002933333  | 0.0151       | -0.0468      | -0.1068      |
| FKBP3        | 0.057433333  | 0.124733333  | 0.100066667  | 0.0069       |
| LOC727808    | 0.0236       | 0.0745       | 0.1358       | -0.0279      |
| LOC642082    | 0.077233333  | -0.0768      | 0.1756       | 0.0983       |
| HNRNPA1      | 0.568566667  | 0.059233333  | 0.175866667  | 0.2244       |
| NIF3L1       | 0.182633333  | 0.135233333  | 0.106166667  | 0.026566667  |
| C14orf78     | 0.0223       | 0.172166667  | -0.0178      | 0.0601       |
| EIF4G1       | 0.246266667  | 0.244633333  | 0.122933333  | 0.1367       |
| C18orf54     | 0.167866667  | 0.151166667  | 0.070066667  | 0.0162       |
| C6orf225     | -0.1319      | 0.175166667  | -0.093166667 | -0.265266667 |
| TMEM150A     | -0.215933333 | -0.044033333 | 0.164033333  | -0.166766667 |
| HECA         | -0.027533333 | -0.097933333 | -0.094733333 | -0.210833333 |
| LOC648863    | 0.197966667  | 0.1943       | 0.029166667  | -0.1371      |
| MRPS36       | -0.1203      | -0.0507      | 0.092666667  | -0.104833333 |
| LOC653189    | -0.025533333 | 0.1698       | 0.181666667  | -0.0993      |
| DNAJC19      | -0.092633333 | -0.060433333 | 0.0229       | -0.1265      |
| FAM134B      | -0.1223      | 0.0313       | -0.0562      | -0.198       |
| GALK1        | -0.116733333 | 0.060733333  | -0.083466667 | -0.091733333 |
| C19orf43     | 0.128666667  | 0.112366667  | 0.1556       | 0.092733333  |
| SNX22        | -0.033533333 | -0.0606      | 0.040033333  | -0.103733333 |
| TMEM175      | -0.2444      | -0.0382      | 0.166733333  | -0.203533333 |
| MTA3         | -0.174466667 | -0.0278      | 0.095233333  | -0.149833333 |
| CCDC58       | 0.177333333  | 0.221666667  | 0.137066667  | 0.061433333  |
| MRPS14       | 0.035466667  | 0.09         | 0.071833333  | -0.0692      |
| SLC9A6       | 0.178633333  | -0.057366667 | 0.096066667  | -0.0582      |
| MFSD1        | -0.033133333 | -0.024966667 | 0.100233333  | 0.0123       |
| MYO18A       | -0.117       | 0.000266667  | 0.0277       | -0.214233333 |
| SNORD100     | 0.1661       | 0.201766667  | 0.103        | 0.078766667  |
| APITD1       | 0.078733333  | 0.080333333  | -0.0323      | -0.0265      |
| C5orf15      | 0.019933333  | 0.097333333  | 0.0138       | -0.0932      |
| RANBP10      | -0.160666667 | 0.048233333  | 0.0627       | -0.129666667 |
| SPATA20      | -0.090633333 | -0.2276      | 0.137866667  | -0.160466667 |
| MMS19        | -0.068433333 | 0.0351       | 0.1491       | -0.100966667 |



|              |              |              |              |              |
|--------------|--------------|--------------|--------------|--------------|
| FLJ35282     | -0.0896      | 0.113266667  | 0.0582       | -0.1738      |
| SECISBP2L    | -0.027966667 | -0.312833333 | -0.083166667 | -0.136966667 |
| WDR55        | 0.109366667  | 0.204866667  | 0.088666667  | 0.043        |
| PLD2         | -0.035266667 | 0.0296       | -0.111466667 | -0.227766667 |
| HCG2P7       | 0.0096       | 0.249466667  | 0.108833333  | 0.041533333  |
| RPS6         | -0.0194      | 0.070766667  | -0.0804      | -0.068033333 |
| C10orf140    | 0.0494       | 0.0401       | 0.019766667  | -0.195766667 |
| AXIN2        | -0.020566667 | -0.058333333 | 0.123933333  | -0.094933333 |
| LOC391692    | 0.162466667  | 0.2581       | -0.048733333 | 0.095366667  |
| PSMC1        | 0.297266667  | 0.076733333  | 0.1089       | 0.064533333  |
| SLC12A6      | -0.042666667 | 0.0593       | -0.067933333 | -0.118266667 |
| UBB          | -0.032       | 0.0841       | 0.1739       | -0.0297      |
| CYB561D1     | -0.036033333 | -0.1396      | -0.101866667 | -0.161633333 |
| LOC645683    | -0.0225      | 0.0513       | 0.049766667  | 0.001        |
| LOC100131265 | 0.127133333  | -0.061766667 | 0.242166667  | -0.160533333 |
| NSBP1        | -0.137566667 | 0.1766       | 0.1061       | -0.181433333 |
| GIN53        | 0.086        | 0.199666667  | 0.234133333  | 0.0955       |
| CPT1A        | 0.1051       | -0.0213      | -0.0885      | -0.2483      |
| LOC648099    | -0.132266667 | 0.1206       | -0.065266667 | -0.1931      |
| MMP14        | 0.2105       | -0.000566667 | -0.0192      | 0.1326       |
| TMEM143      | -0.1155      | -0.0724      | -0.0482      | -0.2031      |
| ZFAND1       | 0.1194       | 0.0098       | 0.029466667  | -0.040866667 |
| MGA          | -0.067833333 | -0.089066667 | 0.0537       | -0.192566667 |
| EIF4EBP3     | -0.170466667 | -0.128966667 | 0.149266667  | -0.157733333 |
| DUS1L        | 0.1864       | 0.114633333  | 0.120666667  | 0.024833333  |
| IDH3B        | 0.1029       | -0.048866667 | -0.000566667 | -0.0766      |
| FAM120B      | -0.0403      | 0.006866667  | 0.077533333  | -0.065133333 |
| CALU         | -0.034766667 | 0.0561       | 0.054166667  | -0.052266667 |
| GMEB1        | 0.133133333  | 0.126533333  | 0.097133333  | 0.014033333  |
| MTA2         | 0.239566667  | 0.1213       | 0.163        | 0.226        |
| LOC158318    | -0.118933333 | 0.065633333  | 0.077533333  | -0.131266667 |
| ZNF468       | 0.047466667  | 0.160966667  | 0.0265       | -0.149866667 |
| SHISA4       | -0.023266667 | -0.097366667 | 0.0185       | -0.2184      |
| TP53RK       | -0.0471      | 0.0619       | 0.038        | -0.056533333 |
| DUSP2        | 0.1682       | 0.008        | 0.135        | 0.125366667  |
| VIL2         | 0.067333333  | -0.0214      | -0.026566667 | -0.111066667 |
| MAML1        | 0.105933333  | 0.048133333  | 0.016033333  | 0.016966667  |
| PLCH2        | -0.113733333 | 0.0512       | 0.160966667  | -0.041833333 |
| TMEM47       | -0.076633333 | -0.090933333 | -0.577666667 | -0.367233333 |
| CNPY3        | -0.095833333 | -0.118133333 | -0.0483      | -0.233       |
| BMS1P5       | -0.0384      | 0.1937       | 0.2462       | -0.065933333 |
| LOC728612    | 0.0134       | 0.249433333  | 0.046433333  | -0.0341      |
| LOC201725    | 0.161066667  | 0.1919       | -0.0335      | 0.014533333  |
| NPTN         | 0.014133333  | -0.012966667 | -0.1073      | -0.0551      |
| FLCN         | -0.064266667 | -0.064166667 | 0.130033333  | -0.084633333 |
| TMEM159      | -0.117266667 | -0.061266667 | -0.027       | -0.2872      |
| MPI          | -0.114466667 | -0.1346      | 0.119866667  | -0.3338      |

|              |              |              |              |              |
|--------------|--------------|--------------|--------------|--------------|
| IKZF3        | 0.093533333  | -0.0148      | 0.1363       | 0.061633333  |
| LOC727848    | 0.283933333  | 0.037833333  | -0.140133333 | -0.062033333 |
| C9orf21      | 0.230533333  | 0.169433333  | -0.199333333 | 0.023133333  |
| EPM2A        | 0.0114       | -0.076233333 | 0.082266667  | 0.0089       |
| WDR62        | 0.1075       | 0.4158       | 0.0192       | 0.047333333  |
| PYCR1        | -0.078833333 | -0.0309      | -0.3395      | -0.249466667 |
| C14orf43     | 0.1592       | -0.016833333 | -0.002       | -0.025066667 |
| RBMV2FP      | -0.059966667 | 0.116866667  | 0.220933333  | 0.070633333  |
| CANX         | -0.081466667 | 0.049333333  | 0.105533333  | -0.113766667 |
| LOC100134291 | -0.122033333 | 0.041566667  | 0.080433333  | -0.1456      |
| ZBTB34       | -0.069733333 | 0.055        | 0.0439       | 0.073766667  |
| CYB5R1       | -0.129666667 | -0.139233333 | 0.0929       | -0.144033333 |
| LOC650369    | 0.124366667  | 0.078566667  | 0.340133333  | 0.0452       |
| STK36        | -0.0438      | -0.0394      | -0.030966667 | -0.066866667 |
| SLC7A6OS     | 0.1226       | -0.022066667 | 0.157133333  | 0.041766667  |
| ZKSCAN1      | -0.3267      | 0.104966667  | -0.056533333 | -0.2549      |
| RNY1         | 0.053433333  | 0.015666667  | 0.065566667  | -0.170266667 |
| SRP54        | 0.1682       | 0.0635       | 0.022866667  | -0.041266667 |
| NSDHL        | -0.001133333 | 0.116766667  | 0.3747       | 0.3621       |
| RFX7         | 0.0276       | -0.119766667 | 0.182566667  | -0.012566667 |
| OSTC         | 0.0617       | 0.2223       | -0.083666667 | -0.038266667 |
| PIGW         | 0.219233333  | 0.096366667  | 0.077266667  | 0.0225       |
| AFMID        | -0.206       | 0.125266667  | 0.0862       | -0.053133333 |
| LOC644619    | 0.069033333  | 0.0013       | 0.097933333  | -0.102933333 |
| TOMM6        | 0.186266667  | 0.111033333  | 0.0103       | -0.0569      |
| SOAT1        | 0.077833333  | 0.008033333  | 0.215233333  | 0.024533333  |
| MGC40489     | 0.2385       | 0.371833333  | 0.0238       | -0.079366667 |
| LPAR2        | -0.065066667 | -0.054066667 | 0.1988       | 0.0098       |
| SEC23B       | 0.2348       | 0.249033333  | 0.045266667  | 0.0541       |
| BAG4         | -0.0174      | 0.130533333  | -0.0232      | -0.104633333 |
| HPRT1        | 0.205666667  | 0.2467       | 0.149333333  | -0.0599      |
| ACP2         | -0.0397      | -0.218233333 | -0.1091      | -0.224066667 |
| ADNP         | 0.007366667  | 0.097333333  | 0.050333333  | -0.065       |
| CCDC111      | -0.1438      | 0.081133333  | 0.095        | 0.023566667  |
| LOC440280    | 0.016        | 0.109        | 0.0166       | -0.074633333 |
| C5orf35      | -0.0212      | 0.031066667  | 0.156133333  | -0.056366667 |
| DVL3         | 0.170433333  | -0.118866667 | -0.038366667 | 0.161333333  |
| ARHGEF7      | 0.164666667  | 0.1331       | -0.140166667 | -0.063966667 |
| LOC644131    | 0.2064       | 0.3673       | 0.214033333  | 0.1527       |
| CREBL2       | -0.125433333 | -0.034866667 | 0.103166667  | -0.114433333 |
| TTC39B       | -0.069733333 | 0.0424       | 0.1059       | -0.168266667 |
| CCDC53       | -0.148       | -0.147366667 | 0.109333333  | -0.1451      |
| CHRAC1       | 0.2105       | 0.0078       | 0.1178       | 0.104433333  |
| IPP          | -0.0997      | 0.0699       | 0.0193       | -0.177633333 |
| ERCC6L       | 0.192466667  | 0.1758       | 0.165433333  | 0.014033333  |
| FKBP8        | -0.001333333 | 0.005233333  | 0.002        | -0.0743      |
| CCDC22       | 0.1952       | 0.064333333  | 0.1854       | 0.074766667  |

|           |              |              |              |              |
|-----------|--------------|--------------|--------------|--------------|
| HSPA8     | 0.1529       | 0.2049       | 0.142966667  | 0.113333333  |
| KLHDC3    | 0.1257       | -0.0554      | 0.131266667  | -0.0257      |
| DPF2      | 0.139466667  | 0.038266667  | -0.1165      | 0.026533333  |
| LOC645726 | 0.080433333  | 0.130466667  | 0.144533333  | 0.084133333  |
| HIAT1     | 0.002666667  | 0.0341       | 0.034766667  | -0.047466667 |
| NHP2      | 0.111933333  | 0.0203       | 0.302433333  | 0.193266667  |
| ATP5J     | 0.070866667  | 0.013033333  | 0.286466667  | 0.0435       |
| LOC649679 | 0.220933333  | 0.2812       | 0.012866667  | 0.025533333  |
| ARHGAP12  | 0.159866667  | 0.206966667  | 0.1041       | 0.0604       |
| GXYLT1    | -0.040033333 | 0.140766667  | 0.234366667  | -0.0398      |
| DIS3L2    | 0.001966667  | 0.132133333  | 0.0805       | -0.068133333 |
| MCM4      | 0.1285       | 0.186266667  | 0.049966667  | -0.0356      |
| PEX14     | -0.031433333 | 0.0982       | 0.120233333  | -0.0138      |
| EFTUD2    | 0.1253       | 0.153133333  | 0.013166667  | 0.016133333  |
| FBXO45    | 0.2111       | 0.1171       | 0.148333333  | 0.057166667  |
| SF3A1     | 0.1524       | 0.085333333  | 0.132866667  | 0.0627       |
| MIR658    | 0.1852       | 0.129933333  | 0.222433333  | -0.025966667 |
| PRKCSH    | 0.030233333  | 0.0085       | 0.015        | -0.1199      |
| B3GALNT2  | 0.162866667  | 0.154533333  | 0.0328       | -0.025633333 |
| LOC389834 | 0.096        | 0.0635       | 0.081733333  | -0.0059      |
| CMTM4     | -0.047266667 | 0.072766667  | 0.2739       | 0.0087       |
| ANKHD1    | 0.0717       | -0.204333333 | -0.1943      | -0.1288      |
| TOMM40    | 0.305733333  | 0.269366667  | 0.1089       | 0.156766667  |
| C6orf167  | 0.0876       | 0.1939       | 0.035233333  | 0.0819       |
| PP14571   | 0.144366667  | -0.122633333 | 0.060933333  | -0.020866667 |
| ARAP1     | 0.079866667  | -0.019133333 | 0.118866667  | 0.1008       |
| C11orf82  | 0.161366667  | 0.436433333  | 0.121466667  | 0.106433333  |
| PTEN      | -0.158233333 | -0.081833333 | -0.134933333 | -0.2611      |
| PBX4      | -0.0365      | 0.013766667  | 0.049066667  | -0.045833333 |
| TSSC1     | 0.061666667  | 0.051333333  | 0.146933333  | -0.090333333 |
| ITPRIPL2  | 0.0331       | 0.152833333  | -0.036233333 | -0.0126      |
| PABPC1L   | -0.3107      | -0.29        | -0.0157      | -0.4303      |
| LOC642946 | -0.039633333 | -0.0635      | -0.036133333 | -0.104166667 |
| HDGF2     | 0.2743       | 0.066        | 0.059333333  | 0.0471       |
| CNOT6L    | 0.0666       | 0.0269       | 0.057533333  | -0.116933333 |
| DNM2      | 0.136633333  | 0.1075       | 0.079933333  | -0.071366667 |
| SLC4A2    | 0.2506       | 0.0525       | -0.046033333 | -0.058233333 |
| PSMC3     | 0.046566667  | 0.138666667  | 0.075933333  | 0.0115       |
| SSX4B     | -0.008566667 | 0.038366667  | 0.0497       | -0.080866667 |
| XBP1      | 0.0646       | 0.054633333  | -0.283833333 | -0.310233333 |
| HAS3      | 0.140566667  | 0.005433333  | 0.065033333  | -0.082266667 |
| SBNO2     | 0.0705       | 0.157033333  | -0.058466667 | 0.0755       |
| LOC730167 | 0.284533333  | 0.1333       | 0.108533333  | 0.0182       |
| LOC650029 | 0.1035       | 0.068666667  | 0.144133333  | 0.064033333  |
| SNW1      | 0.1793       | 0.150733333  | -0.0558      | -0.0117      |
| VBP1      | 0.235466667  | 0.2077       | -0.012933333 | 0.098533333  |
| NR1H3     | -0.172066667 | -0.0555      | 0.0407       | -0.233       |

|               |              |              |              |              |
|---------------|--------------|--------------|--------------|--------------|
| LOC168474     | 0.194933333  | 0.104466667  | 0.085533333  | 0.087033333  |
| NDUFS5        | 0.042666667  | 0.071        | 0.0914       | -0.0122      |
| C14orf145     | 0.111733333  | 0.137433333  | 0.106866667  | 0.104566667  |
| DKFZp761P0423 | 0.261633333  | 0.070766667  | 0.0355       | 0.064766667  |
| LOC643300     | 0.1217       | 0.252833333  | 0.086666667  | -0.043566667 |
| C11orf31      | 0.0581       | 0.071166667  | -0.0064      | -0.048533333 |
| LOC100130980  | 0.0484       | 0.011533333  | 0.031466667  | -0.1171      |
| CAPZA2        | 0.126366667  | -0.0278      | 0.056933333  | 0.042466667  |
| DUS2L         | 0.0937       | 0.187366667  | 0.210366667  | 0.091        |
| C16orf61      | 0.192466667  | 0.2391       | 0.180933333  | 0.126566667  |
| SPRR1A        | 0.061866667  | -0.010333333 | 0.025466667  | -0.119966667 |
| MMAA          | -0.0401      | 0.1661       | 0.095066667  | 0.0102       |
| FAM108A2      | -0.006033333 | -0.0465      | 0.172933333  | -0.116966667 |
| C12orf66      | -0.041766667 | -0.011033333 | 0.2866       | 0.048766667  |
| UBE2I         | 0.160533333  | 0.180333333  | 0.073733333  | 0.0474       |
| TMEM161B      | -0.114       | 0.0178       | 0.101066667  | -0.183333333 |
| TOP2A         | 0.143533333  | 0.091466667  | 0.053333333  | -0.003333333 |
| ZNF658        | 0.043766667  | -0.172533333 | 0.028766667  | -0.0929      |
| BTBD2         | -0.263866667 | 0.0082       | 0.1532       | -0.231466667 |
| LNPEP         | 0.114666667  | 0.057266667  | 0.0936       | -0.074266667 |
| LOC100132829  | 0.157933333  | -0.064333333 | 0.032766667  | -0.0345      |
| SNORA57       | 0.059233333  | 0.063033333  | 0.094833333  | -0.0355      |
| CENPO         | 0.284433333  | 0.226466667  | 0.0627       | 0.154566667  |
| NKX2-2        | 0.116        | 0.016866667  | -0.016366667 | -0.165366667 |
| MAPK3         | -0.029466667 | -0.173633333 | 0.045033333  | -0.269433333 |
| ELK4          | 0.138533333  | 0.161866667  | 0.146966667  | 0.110133333  |
| CXorf64       | 0.240933333  | 0.100133333  | 0.368133333  | 0.262833333  |
| WNK1          | -0.024233333 | 0.0012       | -0.0476      | -0.2299      |
| LOC100132564  | 0.107266667  | 0.534766667  | -0.3683      | 0.026433333  |
| TUBG2         | -0.0397      | -0.103833333 | 0.140933333  | -0.0678      |
| NDUFAB1       | 0.009766667  | 0.115666667  | 0.192333333  | 0.011166667  |
| SH2D4A        | 0.106333333  | 0.051933333  | 0.0556       | -0.045533333 |
| CCT2          | 0.2793       | 0.250466667  | 0.1345       | 0.1782       |
| C19orf51      | 0.070533333  | 0.083333333  | -0.158266667 | -0.125866667 |
| LOC100128760  | 0.007633333  | 0.039733333  | 0.199        | -0.043433333 |
| LOC650646     | 0.156833333  | 0.1347       | 0.013        | -0.050966667 |
| COQ7          | 0.058133333  | -0.072833333 | 0.045433333  | -0.159266667 |
| C11orf46      | -0.0651      | 0.0866       | -0.0687      | -0.221766667 |
| OR2A20P       | -0.008566667 | 0.041366667  | 0.161933333  | 0.0216       |
| IPO9          | 0.1607       | 0.0754       | 0.130033333  | 0.019666667  |
| GIT1          | 0.1017       | -0.053133333 | 0.062366667  | 0.090833333  |
| PRRG4         | -0.049166667 | 0.389466667  | 0.089233333  | -0.070033333 |
| REEP2         | 0.0917       | 0.010133333  | -0.051733333 | -0.092733333 |
| PTAR1         | -0.0399      | -0.139033333 | 0.031666667  | -0.1313      |
| LOC645159     | 0.0663       | 0.068533333  | 0.077466667  | -0.2197      |
| BIRC5         | 0.246333333  | 0.286466667  | -0.002333333 | 0.0012       |
| EFR3B         | 0.091733333  | -0.079166667 | 0.168233333  | 0.061133333  |

|              |              |              |              |              |
|--------------|--------------|--------------|--------------|--------------|
| PHB          | 0.165766667  | 0.021966667  | 0.150566667  | 0.041533333  |
| SNORD11      | 0.123533333  | 0.267266667  | 0.302        | -0.022433333 |
| ARRDC4       | 0.1848       | -0.008833333 | -0.2862      | 0.000233333  |
| LOC728034    | 0.059533333  | -0.015766667 | 0.177866667  | 0.0075       |
| DGUOK        | 0.070033333  | 0.206666667  | 0.200166667  | 0.0347       |
| CINP         | 0.177433333  | -0.030033333 | 0.165133333  | 0.049766667  |
| TSEN2        | -0.033733333 | 0.1312       | 0.047066667  | -0.113533333 |
| CCT7         | 0.2865       | 0.192133333  | 0.2394       | 0.2797       |
| CASC5        | 0.099766667  | 0.039933333  | 0.143833333  | 0.0207       |
| KCNIP3       | -0.1724      | -0.0129      | 0.052633333  | -0.133766667 |
| ZNF670       | 0.1102       | 0.105333333  | 0.169633333  | 0.163466667  |
| FAM8A1       | -0.301033333 | -0.224766667 | 0.168366667  | -0.305633333 |
| LOC645304    | 0.0108       | 0.345633333  | 0.105666667  | -0.1214      |
| LOC646200    | -0.054933333 | 0.0039       | 0.116633333  | -0.1641      |
| PRPF31       | 0.036833333  | 0.020733333  | 0.0686       | -0.064066667 |
| HMBOX1       | -0.0199      | 0.017766667  | 0.143766667  | -0.133733333 |
| SNORD57      | 0.113733333  | 0.1608       | 0.165466667  | 0.047866667  |
| LUC7L        | 0.1933       | 0.027933333  | 0.130933333  | -0.007633333 |
| FBXO46       | 0.0758       | 0.003        | 0.011066667  | -0.1054      |
| CDC25A       | 0.343933333  | 0.5193       | 0.448233333  | 0.375166667  |
| FLJ20489     | -0.236       | -0.0982      | 0.1693       | -0.271133333 |
| LOC729209    | 0.0255       | 0.151833333  | 0.023933333  | -0.037766667 |
| LOC100130168 | -0.158933333 | 0.0745       | 0.212        | -0.232233333 |
| C9orf7       | -0.0562      | -0.082366667 | 0.0772       | -0.2411      |
| FADS1        | -0.0619      | -0.142766667 | 0.064866667  | -0.086833333 |
| RAN          | 0.207066667  | 0.045233333  | 0.224766667  | 0.0718       |
| LOC391044    | 0.212733333  | 0.1108       | 0.1061       | 0.159666667  |
| RNU6-1       | 0.228966667  | 0.017066667  | -0.064       | -0.008033333 |
| C10orf47     | 0.062833333  | 0.059466667  | 0.1025       | -0.048833333 |
| LOC162073    | 0.049633333  | 0.138166667  | 0.2647       | -0.002466667 |
| TIRAP        | 0.133266667  | 0.0404       | 0.000233333  | 0.01         |
| ITGA10       | -0.001266667 | 0.0493       | 0.149366667  | -0.067733333 |
| PMPCB        | -0.045766667 | -0.167533333 | 0.112466667  | -0.145233333 |
| LOC648927    | -0.106666667 | 0.1266       | 0.062966667  | -0.093466667 |
| HDAC2        | 0.1775       | 0.1127       | 0.1463       | 0.018966667  |
| LOC100132347 | 0.154433333  | 0.063266667  | 0.205433333  | -0.0101      |
| PLEKHF2      | 0.125933333  | -0.0215      | 0.0508       | 0.039066667  |
| FCGR3B       | 0.2377       | -0.0311      | 0.0122       | 0.0864       |
| ADAM17       | -0.089066667 | 0.0477       | -0.006466667 | -0.286466667 |
| GJC1         | 0.4538       | 0.192733333  | 0.033666667  | 0.0149       |
| LOC648665    | 0.025933333  | 0.169833333  | 0.1566       | -0.093133333 |
| DGCR6L       | -0.160533333 | -0.076       | -0.1487      | -0.1904      |
| LOC644934    | 0.176933333  | 0.132366667  | -0.0126      | 0.076033333  |
| COMTD1       | -0.0134      | 0.074566667  | 0.097633333  | -0.0552      |
| TTC15        | 0.053933333  | 0.126166667  | -0.041133333 | -0.0386      |
| TMEM126B     | -0.066666667 | 0.088333333  | 0.226166667  | 0.029        |
| ZNF101       | 0.2043       | 0.0633       | 0.068666667  | -0.055033333 |

|           |              |              |              |              |
|-----------|--------------|--------------|--------------|--------------|
| LOC648343 | -0.326733333 | 0.005566667  | -0.188333333 | -0.453666667 |
| C11orf59  | 0.028        | -0.019466667 | -0.0358      | -0.0195      |
| NOP10     | 0.0938       | 0.183366667  | 0.260566667  | 0.088066667  |
| AADAT     | 0.0932       | 0.1361       | 0.040333333  | 0.050933333  |
| H2AFJ     | -0.204266667 | -0.083566667 | 0.317266667  | -0.077033333 |
| GSTA4     | -0.2492      | -0.151233333 | 0.051233333  | -0.2989      |
| RBMX2     | 0.071166667  | 0.0902       | -0.1036      | -0.094933333 |
| RMND1     | -0.082566667 | 0.0155       | 0.040366667  | -0.1676      |
| ACAD10    | -0.115866667 | -0.009033333 | -0.1242      | -0.082933333 |
| LANCL1    | -0.2281      | 0.003266667  | 0.074733333  | -0.2198      |
| LOC728661 | -0.207533333 | -0.260233333 | -0.188233333 | -0.369       |
| PHF6      | 0.134466667  | 0.2599       | 0.045        | -0.083766667 |
| COG6      | -0.051333333 | -0.0782      | -0.0194      | -0.379166667 |
| FAM76A    | 0.087633333  | 0.007466667  | 0.096533333  | -0.002533333 |
| LOC647055 | 0.141533333  | 0.206166667  | 0.139233333  | -0.027533333 |
| PELP1     | -0.003       | 0.193733333  | 0.098833333  | -0.0023      |
| NUDT15    | 0.189566667  | 0.2974       | -0.097633333 | 0.090033333  |
| C19orf63  | -0.077766667 | 0.094233333  | -0.0267      | -0.049166667 |
| NFU1      | 0.059066667  | 0.116533333  | 0.076766667  | -0.073866667 |
| C1orf112  | 0.128633333  | 0.1516       | 0.143866667  | -0.0964      |
| ZFX       | 0.007133333  | 0.097466667  | 0.133433333  | -0.071966667 |
| ARRDC2    | 0.141266667  | 0.081533333  | 0.1834       | 0.007733333  |
| ZNF263    | 0.248466667  | -0.098366667 | -0.097866667 | 0.093566667  |
| HAT1      | 0.279066667  | 0.2359       | -0.014366667 | 0.080066667  |
| DCLRE1A   | -0.037066667 | 0.183766667  | 0.012933333  | -0.156433333 |
| LOC728672 | 0.0119       | 0.070966667  | -0.132033333 | -0.196433333 |
| GCET2     | -0.006833333 | -0.0999      | 0.1983       | -0.069366667 |
| S100BPB   | -0.019733333 | -0.043433333 | 0.053733333  | -0.129733333 |
| ZNF443    | 0.035633333  | 0.070833333  | 0.122133333  | 0.030633333  |
| LOC645609 | -0.080166667 | 0.001633333  | 0.0974       | -0.175266667 |
| KIAA1797  | 0.010833333  | 0.0352       | 0.058833333  | -0.120466667 |
| RTTN      | -0.056766667 | 0.098166667  | 0.107566667  | -0.112433333 |
| RAB4A     | -0.010733333 | -0.040366667 | 0.008233333  | -0.116       |
| ZNF334    | -0.1016      | -0.046933333 | -0.009       | -0.123133333 |
| IQGAP3    | 0.107        | 0.108033333  | 0.231966667  | 0.094866667  |
| ZNHIT2    | -0.017633333 | 0.150666667  | 0.0821       | -0.137633333 |
| RNFT1     | 0.048566667  | -0.076033333 | 0.026366667  | -0.127033333 |
| SNX33     | 0.029366667  | -0.055566667 | 0.0352       | -0.125766667 |
| ACTRT1    | 0.0951       | -0.032966667 | 0.137933333  | 0.0901       |
| ADHFE1    | -0.1308      | 0.023566667  | 0.0709       | -0.234       |
| ALB       | 0.314066667  | 0.007333333  | -0.019066667 | 0.0129       |
| WDR92     | 0.121733333  | 0.166666667  | 0.0045       | -0.053766667 |
| CASP7     | 0.151366667  | 0.112        | 0.096766667  | 0.103766667  |
| OSR2      | 0.161066667  | -0.035533333 | -0.004466667 | 0.065666667  |
| C6orf61   | 0.127133333  | 0.0031       | 0.1375       | 0.020066667  |
| LOC401397 | 0.024366667  | 0.037233333  | 0.0993       | -0.088333333 |
| ELF3      | 0.100033333  | 0.2248       | 0.075833333  | -0.040933333 |

|           |              |              |              |              |
|-----------|--------------|--------------|--------------|--------------|
| ACSS2     | -0.061866667 | 0.060433333  | 0.379933333  | 0.025066667  |
| LOC400027 | 0.128266667  | 0.064        | 0.057733333  | 0.0531       |
| SUPT5H    | 0.0766       | 0.064966667  | -0.026133333 | -0.018733333 |
| C1orf74   | 0.065        | 0.0992       | 0.1646       | 0.038166667  |
| LOC389517 | 0.009033333  | 0.102066667  | 0.388433333  | -0.1223      |
| WDR53     | 0.2579       | 0.109966667  | 0.148        | 0.107166667  |
| SRPR      | 0.125266667  | 0.094733333  | -0.064066667 | -0.0193      |
| C14orf133 | -0.0857      | -0.0411      | -0.0104      | -0.174733333 |
| FAM136B   | 0.0896       | 0.147566667  | 0.196366667  | 0.0718       |
| MTCP1     | -0.212666667 | -0.033533333 | -0.0268      | -0.2614      |
| SLC31A1   | -0.257066667 | -0.3384      | -0.0813      | -0.268566667 |
| LOC641992 | 0.191133333  | 0.248966667  | 0.044766667  | 0.026266667  |
| STAT5B    | -0.035633333 | -0.062433333 | 0.1251       | -0.0591      |
| FAM57A    | 0.1467       | 0.153733333  | 0.074033333  | 0.026966667  |
| NPHP3     | 0.132166667  | -0.0511      | 0.046233333  | -0.0915      |
| ZFYVE1    | -0.1662      | -0.170733333 | 0.142433333  | -0.278433333 |
| CCNK      | 0.2689       | 0.138        | -0.1677      | 0.094366667  |
| ALDH1L2   | -0.136266667 | -0.266166667 | -0.331933333 | -0.415666667 |
| STRN3     | 0.083233333  | 0.022866667  | 0.153333333  | -0.0238      |
| RAB5C     | 0.2003       | 0.0804       | 0.214        | 0.052433333  |
| SSX3      | 0.0721       | 0.084566667  | -0.028466667 | -0.015066667 |
| HEATR2    | 0.150433333  | 0.0756       | -0.0767      | -0.148966667 |
| VKORC1    | -0.1794      | -0.039       | 0.069866667  | -0.283766667 |
| ASAP2     | 0.1818       | 0.194166667  | -0.056133333 | -0.018433333 |
| ZHX1      | 0.015766667  | 0.063233333  | 0.085466667  | -0.1622      |
| ALG5      | -0.033366667 | 0.1146       | -0.057166667 | -0.134033333 |
| UTP11L    | 0.231833333  | 0.214933333  | 0.0939       | 0.108733333  |
| LOC728026 | 0.110133333  | 0.2629       | -0.204033333 | -0.139566667 |
| HSPBP1    | 0.2546       | 0.1162       | 0.006766667  | 0.029433333  |
| AURKA     | 0.3803       | 0.123066667  | -0.026133333 | 0.076033333  |
| PPIG      | 0.259066667  | 0.0962       | 0.069133333  | 0.061133333  |
| KAT2A     | -0.035166667 | 0.063633333  | 0.131733333  | -0.1024      |
| SYMPK     | 0.060066667  | 0.1077       | -0.069       | 0.0537       |
| THYN1     | 0.1608       | 0.055666667  | 0.074866667  | -0.003233333 |
| LOC400836 | 0.038366667  | 0.234033333  | 0.084266667  | -0.110633333 |
| PDE4A     | 0.118366667  | 0.077133333  | -0.025966667 | -0.0009      |
| IFT122    | 0.013        | -0.100133333 | -0.045166667 | -0.158233333 |
| IQSEC1    | 0.088433333  | 0.044733333  | -0.0612      | -0.0126      |
| LOC440348 | 0.053333333  | -0.117733333 | -0.109233333 | -0.165566667 |
| DHX8      | 0.034533333  | 0.023333333  | 0.054266667  | -0.026733333 |
| LOC641750 | -0.4831      | 0.391466667  | -0.730066667 | -0.643233333 |
| MRPL53    | 0.091666667  | -0.046333333 | 0.131033333  | -0.022433333 |
| EPRS      | -0.046866667 | -0.0735      | -0.183966667 | -0.230066667 |
| NDUFA3    | 0.006566667  | -0.114333333 | 0.179833333  | -0.096466667 |
| C5orf25   | 0.213466667  | 0.173933333  | 0.068833333  | -0.0086      |
| CLIP2     | -0.044433333 | -0.0333      | -0.062266667 | -0.189966667 |
| MAP2K1IP1 | 0.033333333  | 6.00E-04     | 0.100666667  | 0.001833333  |

|              |              |              |              |              |
|--------------|--------------|--------------|--------------|--------------|
| ZNF615       | -0.0447      | 0.002566667  | 0.094033333  | -0.042033333 |
| POU2F1       | 0.001566667  | 0.052        | 0.065733333  | -0.0677      |
| TRMT61A      | 0.241833333  | 0.080633333  | -0.1249      | 0.006233333  |
| POLN         | -0.0432      | 0.0219       | 0.143033333  | -0.138133333 |
| PAQR7        | -0.035833333 | 0.043533333  | 0.0581       | -0.209866667 |
| LOC100130715 | 0.0905       | -0.106866667 | 0.0969       | 0.063933333  |
| LOC441454    | -0.036633333 | 0.194866667  | 0.0219       | -0.2598      |
| HSPE1        | 0.202933333  | -0.0387      | 0.4338       | 0.2404       |
| CP110        | 0.1988       | 0.290933333  | 0.2837       | 0.2208       |
| EHD3         | 0.014666667  | 0.083033333  | 0.139466667  | -0.0878      |
| LOC440145    | 0.388366667  | 0.0461       | 0.203733333  | 0.1308       |
| DERL1        | 0.089333333  | 0.0714       | -0.100266667 | -0.164266667 |
| LOC728098    | 0.286366667  | 0.2564       | 0.117033333  | 0.154166667  |
| BCL2L11      | 0.016266667  | -0.025866667 | -0.061133333 | -0.219233333 |
| APTX         | -0.037966667 | 0.0637       | 0.0314       | -0.1421      |
| ZSCAN18      | 0.233133333  | 0.0086       | 0.038133333  | -0.055933333 |
| PPP2R1A      | 0.155966667  | -0.011033333 | -0.112       | -0.037333333 |
| ZNF674       | 0.024733333  | 0.0775       | 0.164        | -0.1122      |
| PPP1CC       | 0.294466667  | -0.040566667 | 0.093233333  | -0.038833333 |
| CALM3        | 0.175466667  | 0.061        | 0.1429       | -0.0874      |
| LOC727914    | -0.005966667 | 0.177433333  | 0.018066667  | -0.073333333 |
| AIMP2        | 0.094066667  | 0.019666667  | 0.1317       | -0.010533333 |
| CRNKL1       | -0.084266667 | 0.046933333  | 0.175133333  | -0.1286      |
| REP15        | 0.0516       | 0.062466667  | 0.091933333  | -0.016833333 |
| GNPNAT1      | 0.287833333  | 0.0937       | 0.269233333  | 0.2086       |
| LOC100133812 | 0.0132       | -0.065433333 | 0.029133333  | -0.087166667 |
| LOC729259    | -0.073766667 | -0.043766667 | -0.0472      | -0.098166667 |
| IFI30        | 0.0497       | 0.036333333  | -0.014166667 | 0.0098       |
| ETV3         | 0.315233333  | 0.148666667  | 0.102033333  | 0.041033333  |
| JDP2         | -0.0688      | -0.117133333 | -0.298933333 | -0.350366667 |
| ZFP42        | 0.046033333  | 0.1154       | 0.037333333  | -0.077       |
| ARIH1        | 0.1613       | 0.1157       | -0.0128      | 0.007233333  |
| PLEKHB2      | 0.074366667  | 0.391666667  | 0.028666667  | -0.094666667 |
| SULT1A3      | 0.2252       | 0.075466667  | 0.030266667  | 0.121866667  |
| POLR3D       | 0.1171       | 0.180533333  | 0.0206       | -0.022333333 |
| LOC643224    | 0.003666667  | 0.181533333  | 0.2705       | 0.0832       |
| MEF2A        | 0.2975       | 0.100033333  | -0.0293      | 0.059033333  |
| EPHA8        | 0.110966667  | 0.043733333  | 0.028466667  | 0.064266667  |
| SF3B1        | 0.089566667  | 0.201033333  | 0.1275       | -0.065966667 |
| NELF         | 0.101533333  | 0.013266667  | -0.038166667 | -0.093166667 |
| LRBA         | -0.146566667 | 0.0273       | 0.145133333  | -0.201366667 |
| NDUFV2       | 0.056066667  | 0.125        | 0.129166667  | -0.006866667 |
| DYNLL2       | 0.154933333  | 0.182766667  | 0.1048       | -0.016333333 |
| LOC650128    | -0.0576      | 0.1713       | 0.369666667  | -0.0394      |
| GLOD4        | -0.004866667 | -0.0518      | 0.105466667  | -0.0949      |
| FAM83D       | 0.473166667  | 0.274        | 0.039366667  | 0.287833333  |
| AHCTF1       | 0.277666667  | 0.190466667  | 0.1278       | 0.0901       |



|              |              |              |              |              |
|--------------|--------------|--------------|--------------|--------------|
| MTPN         | 0.073433333  | 0.0724       | 0.113766667  | -0.047366667 |
| MAPBPIP      | -0.097466667 | -0.210366667 | 0.0822       | -0.1999      |
| LOC100128771 | -0.1694      | -0.0803      | 0.056766667  | -0.363066667 |
| LOC729768    | 0.2974       | 0.2289       | 0.048533333  | 0.079433333  |
| PDIA4        | 0.031366667  | 0.0448       | 0.116766667  | -0.0485      |
| FLVCR1       | 0.107266667  | -0.008933333 | 0.131233333  | 0.042833333  |
| RPS6KB2      | 0.132766667  | -0.0232      | -0.0488      | -0.164266667 |
| CCDC15       | 0.0998       | 0.3789       | 0.125433333  | -0.1113      |
| C1orf24      | 0.043666667  | 0.124433333  | -0.7591      | -0.336833333 |
| RBM26        | 0.093833333  | 0.2573       | 0.1235       | 0.067466667  |
| LOC654254    | 0.271066667  | 0.124133333  | 0.018266667  | -0.0465      |
| GTF2H4       | 0.235066667  | -0.037833333 | -0.116566667 | -0.1204      |
| TUBA1C       | 0.270066667  | 0.209433333  | 0.171833333  | 0.108566667  |
| ZBED3        | -0.068633333 | -0.047666667 | -0.068966667 | -0.2563      |
| INO80B       | 0.057566667  | -0.043933333 | -0.055466667 | -0.097866667 |
| LMBRD1       | -0.206266667 | -0.035266667 | 0.0877       | -0.127133333 |
| CCDC51       | 0.0639       | 0.1445       | 0.173566667  | 0.003733333  |
| TUBB2B       | -0.161733333 | -0.1261      | -0.222433333 | -0.3166      |
| COL4A3BP     | -0.547266667 | -0.4181      | -0.153066667 | -0.662166667 |
| SSX2IP       | 0.123333333  | 0.208266667  | 0.151866667  | -0.0661      |
| XPR1         | 0.1287       | 0.107666667  | 0.038        | -0.014833333 |
| CNOT3        | 0.4113       | 0.2022       | 0.0643       | 0.1492       |
| LOC100129552 | 0.105466667  | 0.123333333  | 0.1169       | -0.071       |
| TMEM33       | 0.031        | 0.1466       | 0.259966667  | 0.040566667  |
| CPEB3        | 0.055533333  | 0.022133333  | -0.072966667 | -0.190033333 |
| LOC645430    | -0.210966667 | 0.0442       | 0.0585       | -0.224033333 |
| RPL18A       | -0.006533333 | 0.139333333  | -0.012       | 0.022033333  |
| CCDC94       | 0.070666667  | -0.088       | 0.153533333  | -0.010966667 |
| LOC645100    | 0.143433333  | 0.107333333  | 0.063733333  | -0.061433333 |
| YAP1         | 0.133        | 0.1035       | 0.1197       | -0.048233333 |
| MPP1         | 0.0028       | 0.0065       | 0.101733333  | -0.176033333 |
| LOC400657    | 0.023        | -0.095933333 | -0.2051      | -0.095366667 |
| MRPL30       | 0.245433333  | 0.119966667  | 0.273066667  | 0.108666667  |
| HSPA12A      | -0.132433333 | -0.010833333 | 0.265966667  | -0.130833333 |
| PCF11        | -0.052033333 | 0.082266667  | 0.070333333  | -0.158866667 |
| MGC72080     | -0.1398      | -0.146666667 | 0.009266667  | -0.2556      |
| TRPT1        | -0.0864      | 0.0497       | -0.013266667 | -0.154833333 |
| ARL17B       | 0.111333333  | 0.1812       | 0.078866667  | 0.028233333  |
| IGSF3        | 0.491533333  | 0.211466667  | -0.431766667 | -0.008133333 |
| OCRL         | -0.002933333 | 0.091033333  | -0.024866667 | -0.140566667 |
| REXO1        | 0.180566667  | 0.223633333  | 0.0981       | 0.127666667  |
| SLC22A23     | -0.013033333 | 0.023966667  | -0.013366667 | -0.0172      |
| DOPEY2       | -0.157133333 | 0.081066667  | 0.0052       | -0.288933333 |
| LRAT         | -0.049733333 | 0.156533333  | 0.0782       | -0.0527      |
| HCFC1R1      | -0.140666667 | -0.171633333 | -0.065566667 | -0.414733333 |
| PHF3         | -0.160866667 | -0.117433333 | 0.0081       | -0.1448      |
| LOC284023    | -0.008333333 | 0.020233333  | -0.0631      | -0.1517      |

|              |              |              |              |              |
|--------------|--------------|--------------|--------------|--------------|
| PLK1         | 0.293233333  | 0.143166667  | 0.0279       | 0.065466667  |
| LOC650898    | -0.214966667 | 0.067033333  | 0.329        | -0.1511      |
| C10orf137    | 0.0686       | 0.152133333  | 0.204766667  | 0.051366667  |
| ZNF408       | 0.215266667  | 0.175833333  | 0.082866667  | 0.1261       |
| PAN2         | -0.192233333 | 0.076166667  | -0.0838      | -0.1879      |
| PYGO2        | 0.018333333  | -0.036       | 0.048333333  | 0.056666667  |
| C19orf62     | 0.1505       | -0.0071      | -0.0151      | -0.085633333 |
| HSD11B1L     | 0.002066667  | -0.137833333 | 0.084333333  | -0.1766      |
| GEMIN4       | 0.203333333  | 0.380833333  | 0.427866667  | 0.2189       |
| LOC100129553 | 0.079866667  | 0.032266667  | 0.055133333  | -0.083633333 |
| ZBTB7A       | 0.080766667  | -0.116       | 0.159033333  | -0.010966667 |
| SNORA33      | 0.187666667  | 0.185833333  | 0.249033333  | 0.0646       |
| KHNYN        | 0.0055       | 0.1008       | -0.076033333 | -0.116133333 |
| SNTB2        | 0.3042       | 0.267533333  | 0.0457       | 0.044366667  |
| NSD1         | 0.0015       | 0.074933333  | 0.159166667  | -0.015433333 |
| CRKRS        | 0.2364       | 0.303466667  | 0.1318       | 0.145766667  |
| TAF9L        | -0.067866667 | -0.028266667 | -0.024666667 | -0.108733333 |
| FAM32A       | 0.194033333  | -0.063066667 | 0.0095       | 0.0148       |
| IRF2         | 0.013866667  | 0.1094       | 0.1692       | -0.066766667 |
| SFRS15       | 0.300733333  | 0.2983       | 0.127066667  | 0.1085       |
| NCAPG2       | 0.242433333  | 0.1741       | 0.1407       | 0.0302       |
| SYAP1        | 0.064366667  | 0.112666667  | -0.0029      | -0.0623      |
| ANKRD28      | -0.0482      | -0.215433333 | -0.001       | -0.165833333 |
| APOBEC3C     | -0.021866667 | 0.096066667  | 0.1036       | -0.15        |
| C6orf72      | -0.0193      | 0.126733333  | 0.086466667  | -0.0655      |
| SNORD21      | 0.098433333  | 0.1235       | 0.037666667  | -0.053666667 |
| AKAP7        | 0.0951       | -0.0147      | 0.055933333  | -0.006633333 |
| MKL1         | 0.2598       | 0.1051       | -0.128633333 | -0.1139      |
| MKL2         | 0.040533333  | -0.111166667 | -0.0021      | -0.038633333 |
| ORC3L        | 0.0108       | -0.0909      | -0.013166667 | -0.078366667 |
| LOC731999    | 0.0735       | 0.0558       | -0.000133333 | -0.115766667 |
| PGM2         | 0.159033333  | 0.062633333  | 0.207733333  | -0.062466667 |
| ZNF680       | 0.193333333  | 0.071733333  | 0.2677       | -0.036166667 |
| MRPL1        | 0.0056       | 0.192866667  | -0.008133333 | 0.0136       |
| VARS         | 0.113466667  | 0.1797       | 0.131133333  | -0.0076      |
| KIAA0100     | 0.0554       | -0.039933333 | 0.1572       | -0.079133333 |
| PARS2        | 0.108766667  | 0.052566667  | 0.049833333  | 0.076466667  |
| CDK5RAP1     | 0.116666667  | 0.074633333  | 0.167866667  | 0.0402       |
| ZCCHC11      | -0.0905      | -0.147066667 | -0.101433333 | -0.2974      |
| NHLRC3       | -0.1485      | -0.112566667 | 0.356866667  | -0.2383      |
| CMAS         | 0.194133333  | 0.116466667  | 0.185833333  | 0.0596       |
| LOC729920    | 0.117333333  | 0.035466667  | -0.122933333 | -0.0095      |
| ALDH16A1     | 0.1156       | -0.026866667 | -0.056066667 | -0.200733333 |
| ACTN1        | 0.644966667  | 0.2533       | -0.0877      | 0.113        |
| ZFP82        | 0.1901       | 0.048033333  | 0.0198       | -0.050866667 |
| LOC400963    | 0.066966667  | 0.021333333  | 0.058166667  | -0.081733333 |
| LOC283267    | 0.039733333  | 0.073633333  | 0.140733333  | -0.070066667 |

|              |              |              |              |              |
|--------------|--------------|--------------|--------------|--------------|
| CDIPT        | -0.044566667 | 0.0296       | -0.069833333 | -0.147366667 |
| DNAJC8       | 0.1102       | 0.200666667  | 0.0133       | -0.016233333 |
| EIF2AK3      | 0.043533333  | -0.039066667 | -0.157566667 | -0.263866667 |
| NRAS         | 0.3422       | 0.186433333  | 0.076833333  | 0.200333333  |
| UNC119       | 0.039066667  | -0.017533333 | 0.028666667  | -0.030733333 |
| LIN9         | 0.274633333  | 0.09         | 0.1959       | 0.171433333  |
| SMARCD2      | -0.036       | 0.111266667  | 0.199133333  | 0.061033333  |
| C7orf10      | 0.0763       | -0.016433333 | 0.131        | 0.0557       |
| FAM129A      | 0.107533333  | 0.1647       | -0.5267      | -0.3149      |
| ZNF668       | 0.2478       | 0.117466667  | 0.2239       | 0.200066667  |
| ZNF564       | 0.027966667  | 0.064866667  | 0.0391       | -0.0706      |
| SFRS14       | 0.0826       | 0.192533333  | 0.205833333  | 0.021366667  |
| PIP4K2B      | 0.1569       | 0.103566667  | 0.056866667  | -0.133033333 |
| ASTE1        | -0.1048      | 0.083666667  | 0.113033333  | 0.054933333  |
| ADAM10       | 0.070533333  | -0.017733333 | 0.016733333  | -0.172633333 |
| C17orf96     | 0.082833333  | 0.1234       | 0.042266667  | -0.088933333 |
| SNORD109B    | -0.0609      | 0.027533333  | 0.146166667  | -0.108733333 |
| LOC646195    | -0.012466667 | 0.047566667  | 0.0813       | -0.150266667 |
| LOC645138    | -0.082366667 | 0.028766667  | 0.007133333  | -0.1458      |
| POP4         | 0.0292       | 0.098533333  | 0.0249       | -0.029533333 |
| LOC728973    | -0.153133333 | 0.0844       | 0.0275       | -0.174466667 |
| LRRC47       | 0.044266667  | 0.050966667  | -0.045166667 | -0.018666667 |
| DEPDC6       | -0.263666667 | -0.151366667 | 0.149466667  | -0.068766667 |
| YIPF1        | -0.067633333 | 0.061433333  | 0.115433333  | -0.100833333 |
| CLCN6        | -0.192666667 | -0.160333333 | 0.0967       | -0.2073      |
| PAPD4        | -0.063933333 | -0.056833333 | 0.009766667  | -0.159766667 |
| ZFP30        | 0.010133333  | -0.0331      | 0.040166667  | -0.023566667 |
| NUDT16       | 0.007633333  | -0.107133333 | 0.127366667  | 0.009566667  |
| PPP3CC       | 0.3799       | 0.0772       | -0.025533333 | 0.1728       |
| FAM126B      | 0.038133333  | 0.058166667  | 0.237366667  | -0.003433333 |
| GGTL3        | 0.062166667  | 0.111866667  | 0.038933333  | -0.0987      |
| LOC401206    | 0.077066667  | 0.1017       | 0.087233333  | -0.048       |
| RNF8         | 0.231        | 0.125966667  | 0.102233333  | 0.1017       |
| ZKSCAN5      | 0.202066667  | 0.0258       | -0.019233333 | -0.044833333 |
| PLA2G4B      | -0.118266667 | -0.008766667 | -0.000366667 | -0.195933333 |
| PIGS         | -0.029566667 | -0.056433333 | 0.121        | -0.174966667 |
| LOC642367    | 0.015133333  | 0.0853       | 0.087866667  | -0.0306      |
| LOC100128765 | 0.1623       | 0.169366667  | 0.2165       | -0.0042      |
| C3orf1       | -0.1101      | 0.0204       | 0.068966667  | -0.1358      |
| NASP         | 0.012466667  | 0.112266667  | 0.2168       | -0.076166667 |
| LOC643863    | 0.098333333  | 0.0175       | -0.000233333 | -0.089233333 |
| ZNF77        | 0.0139       | -0.032466667 | 0.115433333  | 0.030533333  |
| WWOX         | 0.064033333  | 0.005266667  | 0.086666667  | -0.173733333 |
| MBD6         | -0.237033333 | -0.022533333 | -0.042066667 | -0.334266667 |
| ATP5B        | 0.020733333  | 0.128266667  | 0.059066667  | -0.085766667 |
| C9orf25      | 0.1691       | 0.055        | -0.0265      | -0.021466667 |
| LOC654194    | 0.053333333  | 0.0338       | -0.023366667 | -0.116333333 |

|              |              |              |              |              |
|--------------|--------------|--------------|--------------|--------------|
| PGAP3        | -0.136666667 | -0.1907      | 0.0117       | -0.369233333 |
| ABCB9        | 0.2025       | 0.173033333  | -0.0197      | 0.155        |
| TMEM219      | -0.129       | -0.0669      | -0.0271      | -0.196633333 |
| LOC644931    | 0.146066667  | 0.0639       | 0.082266667  | -0.0254      |
| CCDC50       | 0.153933333  | 0.144366667  | 0.2003       | -0.030733333 |
| YWHAB        | 0.386266667  | 0.2592       | -0.015866667 | 0.068633333  |
| CD3EAP       | 0.367733333  | 0.247666667  | 0.158166667  | 0.179        |
| LOC401648    | -0.005566667 | -0.011233333 | 0.121033333  | -0.190466667 |
| LOC727826    | -0.100733333 | 0.064066667  | -0.037       | -0.1301      |
| DNAJA1       | 0.173366667  | 0.347433333  | 0.2164       | 0.081333333  |
| LOC390183    | -0.136266667 | 0.0232       | -0.226533333 | -0.4225      |
| ADCY6        | -0.193833333 | 0.115866667  | 0.138133333  | -0.259633333 |
| CBFA2T2      | 0.0706       | -0.0063      | -0.050933333 | -0.075866667 |
| PREI3        | 0.284066667  | 0.141266667  | 0.124133333  | 0.1056       |
| C1orf149     | 0.028833333  | -0.007033333 | 0.084366667  | -0.061666667 |
| C21orf45     | 0.1729       | 0.221033333  | 0.1441       | 0.094966667  |
| TAF1         | -0.056833333 | 0.041666667  | 0.026966667  | -0.173233333 |
| FAM160B1     | 0.3395       | -0.084533333 | -0.081033333 | 0.033733333  |
| HELQ         | 0.0102       | 0.072666667  | -0.005       | -0.144966667 |
| RABGGTB      | 0.0697       | 0.218266667  | 0.0082       | -0.112966667 |
| UFSP1        | -0.082666667 | 0.096833333  | 0.084866667  | -0.040566667 |
| IMP3         | 0.086966667  | 0.111666667  | 0.2394       | -0.0292      |
| LOC100127982 | 0.065133333  | 0.121933333  | -0.0769      | -0.0256      |
| CNIH2        | 0.073166667  | 0.045566667  | 0.185066667  | -0.153133333 |
| PAFAH1B2     | 0.2787       | 0.2496       | 0.0465       | -0.025633333 |
| TLCD1        | 0.044133333  | 0.165066667  | 0.080433333  | -0.110566667 |
| ATP5E        | 0.0371       | -0.043033333 | 0.233633333  | -0.092       |
| UBE1         | 0.1078       | 0.309433333  | 0.0721       | 0.0735       |
| MED6         | 0.2637       | 0.104033333  | 0.097733333  | 0.098566667  |
| TAF5         | 0.269733333  | 0.131633333  | 0.038433333  | 0.1308       |
| PTPN2        | 0.140033333  | 0.0838       | 0.1023       | -0.170466667 |
| TP53INP2     | -0.178633333 | -0.126433333 | 0.268066667  | -0.0881      |
| ZNF543       | 0.112633333  | -0.045433333 | 0.0466       | -0.076133333 |
| ZNF584       | 0.216466667  | 0.042433333  | 0.099333333  | 0.034666667  |
| SFRS2        | 0.3625       | 0.072066667  | 0.288133333  | 0.165866667  |
| LOC644101    | 0.193566667  | 0.1967       | 0.213133333  | 0.0775       |
| ABCF3        | 0.1776       | 0.0078       | 0.0203       | -0.092933333 |
| PGBD2        | 0.057733333  | 0.096333333  | 0.119533333  | -0.005333333 |
| LOC440498    | -0.003366667 | 0.119166667  | 0.262466667  | 0.0195       |
| TARS2        | -0.1022      | 0.1065       | -0.0462      | -0.288066667 |
| PANX1        | 0.109966667  | 0.039133333  | 0.138133333  | 0.022033333  |
| GTF2IRD2B    | -0.053766667 | -0.096566667 | -0.152933333 | -0.1598      |
| ZNF337       | 0.021666667  | -0.032066667 | 0.084433333  | -0.051033333 |
| RALBP1       | 0.137533333  | 0.015533333  | 0.165566667  | -0.051933333 |
| LOC653115    | -0.207866667 | 0.105866667  | 0.132533333  | -0.2506      |
| CKAP2L       | 0.293666667  | 0.3149       | 0.124433333  | 0.128966667  |
| ARL6IP4      | -0.056333333 | 0.030133333  | -0.1895      | -0.175133333 |

|            |              |              |              |              |
|------------|--------------|--------------|--------------|--------------|
| ZNF493     | -0.040266667 | 0.051133333  | 0.142466667  | -0.1678      |
| LOC653175  | 0.180233333  | 0.065633333  | 0.106866667  | -0.067966667 |
| WDR47      | 0.3508       | -0.031       | 0.001133333  | 0.014633333  |
| TTC37      | 0.001233333  | 0.014        | -0.001233333 | -0.169533333 |
| C11orf57   | 0.074733333  | -0.007033333 | 0.075233333  | -0.048533333 |
| ZNF784     | -0.0893      | -0.070833333 | 0.0268       | -0.1736      |
| NR2C2      | 0.137233333  | 0.164433333  | 0.114566667  | -0.048433333 |
| CCNT2      | 0.092866667  | -0.0092      | 0.200266667  | -0.1285      |
| UCK2       | 0.358233333  | 0.391366667  | 0.319633333  | 0.3781       |
| TMEM209    | 0.137566667  | -0.133533333 | 0.155833333  | -0.003133333 |
| SNAPC2     | 0.213966667  | 0.11         | -0.050133333 | -0.085633333 |
| DDX55      | 0.170733333  | 0.012866667  | 0.055433333  | -0.1255      |
| RGS10      | -0.203266667 | 0.001566667  | 0.287533333  | 0.125933333  |
| ARFGAP3    | 0.174433333  | 0.0643       | -0.116166667 | -0.102866667 |
| RAB10      | -0.143733333 | -0.109366667 | 0.042666667  | -0.148166667 |
| C10orf33   | -0.046966667 | 0.0603       | 0.1584       | -0.0442      |
| CHD6       | -0.0751      | 0.006766667  | 0.063166667  | -0.208833333 |
| TMEM120A   | 0.0214       | 0.0642       | -0.032333333 | -0.1498      |
| RRAGC      | -0.054333333 | -0.201       | -0.109566667 | -0.108266667 |
| SEC61A2    | -0.069333333 | 0.220733333  | 0.253266667  | -0.0343      |
| SUCLG1     | -0.079       | 0.1278       | 0.195133333  | -0.087033333 |
| CAP1       | 0.169        | 0.128733333  | 0.107333333  | 0.028833333  |
| DCLK1      | -0.025966667 | -0.070566667 | 0.063        | -0.0114      |
| SLC25A3    | -0.023566667 | -0.1595      | 0.002        | -0.242966667 |
| MOBK1B     | 0.286233333  | 0.160466667  | 0.194533333  | 0.180233333  |
| NSUN5C     | -0.113866667 | -0.085033333 | 0.223566667  | -0.1936      |
| DMRTA1     | 0.018866667  | 0.088666667  | 0.173033333  | -0.042333333 |
| C5orf54    | 0.045133333  | -0.000533333 | -0.1058      | -0.092566667 |
| AIF1       | 0.015833333  | -0.0035      | 0.072466667  | -0.083833333 |
| GADD45GIP1 | 0.028766667  | 0.184233333  | 0.026433333  | 0.063066667  |
| SPAG7      | 0.0183       | -0.015333333 | 0.059366667  | -0.0676      |
| UBA2       | 0.090566667  | 0.191633333  | 0.124266667  | 0.008333333  |
| UBE2Q1     | 0.193466667  | 0.109433333  | 0.061333333  | 0.032        |
| CCDC18     | 0.225033333  | 0.2712       | 0.1969       | -0.009966667 |
| EZR        | 0.169166667  | 0.073266667  | -0.090633333 | -0.117666667 |
| LOC643031  | -0.076466667 | 0.0536       | -0.381       | -0.150666667 |
| LOC653874  | 0.134166667  | 0.330366667  | 0.2035       | -0.023033333 |
| MXD3       | 0.1768       | 0.116533333  | 0.172033333  | -0.0594      |
| SLC38A6    | -0.270433333 | -0.065233333 | 0.112766667  | -0.114833333 |
| RAB27A     | -0.362733333 | -0.248       | 0.5518       | -0.223466667 |
| CCDC117    | 0.249533333  | 0.031166667  | 0.055166667  | 0.069333333  |
| LOC645173  | -0.026166667 | 0.028633333  | -0.067566667 | -0.1444      |
| ARV1       | -0.243866667 | 0.0466       | -0.0042      | -0.281866667 |
| INTS12     | 0.1108       | 0.010433333  | 0.079        | -0.027533333 |
| SFRS10     | 0.2842       | 0.1672       | 0.193066667  | 0.0785       |
| NTAN1      | -0.0235      | 0.1248       | 0.104966667  | -0.1476      |
| LOC402560  | 0.005933333  | 0.1871       | 0.040266667  | -0.0379      |

|              |              |              |              |              |
|--------------|--------------|--------------|--------------|--------------|
| UBQLN4       | 0.042766667  | 0.1114       | 0.089633333  | -0.0147      |
| PABPN1       | 0.248366667  | 0.147066667  | 0.152633333  | 0.085733333  |
| SFRS16       | 0.111333333  | 0.0736       | 0.010233333  | -0.118966667 |
| LOC727899    | 0.079133333  | 0.007633333  | 0.2249       | -0.0269      |
| ANKFY1       | -0.045566667 | 0.034933333  | 0.224233333  | -0.043033333 |
| CENPI        | 0.3471       | 0.123966667  | 0.080166667  | 0.049866667  |
| MGC18216     | 0.117833333  | -0.100166667 | -0.070633333 | -0.177133333 |
| RPS19BP1     | 0.131033333  | 0.1484       | 0.081533333  | -0.0205      |
| PIGC         | 0.0592       | 0.0198       | 0.0725       | -0.030766667 |
| SCYL3        | 0.107833333  | 0.0162       | 0.0013       | -0.062433333 |
| MLL4         | 0.205733333  | -0.006166667 | 0.008166667  | -0.0213      |
| LOC728889    | 0.1706       | 0.0464       | 0.100466667  | -0.0474      |
| CSTF2        | 0.359166667  | 0.141533333  | 0.121433333  | 0.1422       |
| LOC730173    | 0.042666667  | 0.216733333  | 0.059033333  | -0.143366667 |
| LOC150223    | 0.026633333  | 0.014566667  | 0.2773       | -0.0676      |
| LOC100132727 | -0.326033333 | 0.035566667  | 0.2955       | -0.350366667 |
| MPHOSPH8     | -0.0994      | 0.062266667  | -0.0091      | -0.1349      |
| MGC70863     | 0.2404       | 0.154066667  | 0.1829       | 0.108733333  |
| TIPRL        | 0.247266667  | 0.257        | 0.127566667  | 0.133533333  |
| FLJ20254     | 0.088033333  | 0.065533333  | -0.044033333 | -0.2054      |
| C15orf38     | -0.0424      | -0.041866667 | 0.1908       | -0.142033333 |
| SLCO4A1      | -0.006533333 | 0.095766667  | 0.3518       | -0.041233333 |
| SNORD1A      | 0.082233333  | 0.145933333  | 0.150533333  | 0.082133333  |
| PTPLB        | 0.208733333  | 0.1602       | -0.2271      | -0.0725      |
| TRAPPC6B     | 0.1116       | -0.006633333 | -0.0312      | -0.093566667 |
| NUDT18       | -0.291233333 | -0.075466667 | -0.0479      | -0.259533333 |
| WDR4         | 0.064233333  | 0.2754       | 0.1743       | 0.088633333  |
| KIAA1618     | -0.0294      | 0.068266667  | 0.443033333  | -0.0665      |
| LOC729389    | -0.027666667 | 0.0243       | 0.1089       | -0.0883      |
| PEX10        | -0.120733333 | -0.053033333 | 0.126833333  | -0.1071      |
| CCDC97       | 0.197233333  | 0.1223       | -0.115666667 | 0.0325       |
| RPS8         | 0.099        | 0.128066667  | 0.053666667  | -0.059966667 |
| DNAJC22      | 0.09         | 0.149        | 0.026366667  | -0.0309      |
| ATPAF1       | -0.107866667 | 0.1077       | 0.0834       | -0.0843      |
| MBNL1        | 0.1846       | 0.1552       | -0.108       | -0.0871      |
| MIR1228      | 0.3408       | -0.069566667 | 0.3404       | 0.095433333  |
| PSMB2        | 0.248666667  | 0.084666667  | 0.106466667  | 0.008566667  |
| CKAP2        | 0.3071       | 0.086033333  | 0.0287       | -0.0249      |
| LOC652388    | 0.088133333  | -0.107       | 0.0362       | -0.173633333 |
| AKAP8L       | 0.253733333  | 0.005033333  | -0.0621      | -0.0654      |
| EFCBP1       | 0.174        | -0.0298      | 0.2051       | 0.025833333  |
| SOS1         | 0.1359       | 0.0821       | -0.025166667 | -0.140666667 |
| MPST         | 0.0324       | 0.0731       | 0.059366667  | -0.2009      |
| UTP18        | 0.2317       | 0.017333333  | 0.214433333  | 0.040466667  |
| POLR2D       | 0.215133333  | 0.525566667  | 0.1427       | 0.192866667  |
| DGKD         | 0.030333333  | 0.002366667  | -0.0604      | 0.041866667  |
| NSUN3        | 0.093066667  | 0.042566667  | 0.1582       | -0.020733333 |

|           |              |              |              |              |
|-----------|--------------|--------------|--------------|--------------|
| JTB       | -0.045266667 | 0.067766667  | -0.1144      | -0.1848      |
| MRPS12    | 0.371766667  | 0.375966667  | 0.174666667  | 0.2943       |
| LOC645899 | -0.006666667 | 0.113933333  | 0.055366667  | -0.066033333 |
| GNE       | 0.125733333  | 0.182566667  | 0.125233333  | 0.0381       |
| AAAS      | -0.0055      | 0.1808       | 0.0809       | -0.0439      |
| KRBA1     | -0.0389      | -0.1041      | -0.0868      | -0.257066667 |
| GRIPAP1   | 0.047633333  | 0.368266667  | 0.2352       | 0.011566667  |
| ABHD14A   | -0.120533333 | -0.059433333 | 0.1429       | -0.217066667 |
| CDK6      | 0.333666667  | 0.372466667  | 0.3988       | 0.2247       |
| TUT1      | 0.078333333  | 0.1238       | 0.076166667  | -0.059433333 |
| ARHGEF5L  | -0.037866667 | 0.046366667  | 0.155633333  | -0.042933333 |
| CS        | 0.1553       | 0.054        | 0.158333333  | 0.0487       |
| C6orf203  | -0.1028      | 0.048866667  | 0.025633333  | -0.1944      |
| C1orf41   | 0.277066667  | 0.109833333  | 0.212533333  | 0.0346       |
| GCC2      | -0.051       | 0.067233333  | 0.069466667  | -0.169866667 |
| HEXIM2    | -0.0578      | -0.0877      | -0.096633333 | -0.152166667 |
| HECTD2    | 0.103866667  | 0.072033333  | 0.0367       | -0.089366667 |
| C19orf20  | 0.0214       | 0.0239       | 0.113433333  | -0.104466667 |
| RPL3      | -0.179666667 | 0.0028       | 0.020933333  | -0.2275      |
| GON4L     | 0.1106       | 0.012166667  | 0.0186       | -0.1074      |
| REV1      | 0.033033333  | 0.048533333  | 0.069233333  | -0.165066667 |
| PMVK      | 0.082766667  | -0.0062      | 0.037333333  | -0.032633333 |
| REXO2     | 0.0485       | 0.1112       | 0.024733333  | -0.1575      |
| UBAC2     | 0.055466667  | 0.021966667  | 0.044866667  | -0.175566667 |
| HDAC11    | -0.0761      | 0.076566667  | -0.0039      | -0.1103      |
| CCL28     | -0.079966667 | -0.0256      | -0.089933333 | -0.185766667 |
| DDX6      | 0.1724       | 0.244        | -0.084666667 | -0.109633333 |
| RNF185    | 0.091466667  | -0.0698      | 0.063333333  | -0.0756      |
| RBM39     | 0.194333333  | 0.165566667  | 0.052766667  | -0.0745      |
| C1orf156  | 0.0557       | 0.142866667  | -0.0226      | -0.143566667 |
| C6orf145  | 0.3449       | 0.0151       | 0.148533333  | 0.0605       |
| TSC22D3   | -0.1675      | -0.430133333 | -0.217266667 | -0.2276      |
| LHX1      | 0.051233333  | 0.115666667  | 0.108466667  | -0.111366667 |
| PRICKLE1  | 0.164166667  | 0.164766667  | -0.077333333 | -0.065633333 |
| LOC400713 | -0.162033333 | 0.3639       | 0.0274       | -0.1793      |
| C2orf18   | -0.0539      | 0.1777       | 0.2389       | 0.0743       |
| KIAA1274  | -0.0769      | -0.1066      | 0.084466667  | -0.4301      |
| NDC80     | 0.315733333  | 0.218566667  | -0.0694      | 0.0747       |
| P2RY5     | 0.0123       | 0.149866667  | 0.166633333  | -0.007266667 |
| NXT1      | 0.236833333  | 0.218833333  | 0.097        | 0.032366667  |
| RPL10A    | 0.1611       | -0.004266667 | 0.0585       | 0.0165       |
| LOC152217 | 0.119633333  | 0.1614       | -0.027066667 | -0.107166667 |
| RPL7      | 0.093933333  | -0.028066667 | 0.063033333  | -0.037833333 |
| C2orf25   | 0.2691       | 0.183133333  | 0.172066667  | 0.085966667  |
| HINFP     | -0.008566667 | -0.1263      | -0.102       | -0.183333333 |
| RWDD3     | -0.070633333 | 0.010666667  | -0.0306      | -0.0135      |
| YEATS2    | 0.306266667  | 0.145066667  | 0.060833333  | -0.054066667 |

|              |              |              |              |              |
|--------------|--------------|--------------|--------------|--------------|
| YTHDF3       | -0.010966667 | 0.162833333  | 0.044566667  | -0.072       |
| LOC729646    | 0.0822       | 0.087233333  | -0.018066667 | -0.075433333 |
| LOC401115    | -0.018033333 | 0.0092       | 0.218766667  | -0.0695      |
| ZC3H10       | -0.081733333 | -0.0289      | -0.079433333 | -0.030066667 |
| C2orf28      | -0.122733333 | -0.036566667 | 0.036333333  | -0.203066667 |
| C12orf60     | -0.078266667 | 0.148566667  | 0.188366667  | -0.1279      |
| LOC644310    | 0.062266667  | 0.067666667  | 0.057966667  | -0.0991      |
| ENTPD5       | 0.054533333  | -0.042166667 | -0.0098      | -0.117533333 |
| LOC642678    | -0.0395      | 0.0409       | 0.1676       | -0.1806      |
| LOC100127893 | -0.471033333 | 0.200666667  | -0.5245      | -0.501333333 |
| HMGXB4       | 0.0342       | 0.113266667  | 0.196866667  | -0.0406      |
| TTC27        | 0.058133333  | 0.2742       | -0.0071      | -0.026166667 |
| SLC6A8       | -0.097133333 | 0.019566667  | 0.0498       | -0.148166667 |
| PHKA2        | 0.021633333  | -0.095       | 0.0762       | -0.175933333 |
| PHC1         | -0.012133333 | 0.029633333  | 0.192833333  | -0.1277      |
| RIOK1        | 0.1872       | 0.250433333  | 0.339666667  | 0.147533333  |
| CD81         | 0.0257       | 0.0557       | 0.083233333  | -0.0979      |
| LOC145783    | 0.083966667  | 0.147933333  | -0.004133333 | 0.009933333  |
| RAB6A        | -0.091033333 | -0.0885      | -0.139233333 | -0.296366667 |
| OSBPL9       | -0.160466667 | -0.1555      | 0.1359       | -0.158866667 |
| SUV39H1      | 0.323266667  | 0.0628       | 0.1164       | 0.127933333  |
| C4orf27      | 0.121033333  | 0.214933333  | -6.67E-05    | -0.059566667 |
| FDX1         | -0.0015      | -0.0242      | 0.039866667  | -0.1565      |
| ATG2A        | 0.0281       | 0.014766667  | 0.1123       | -0.102833333 |
| OSTCL        | -0.118733333 | 0.2873       | -0.1732      | -0.216366667 |
| QSER1        | 0.178366667  | 0.0581       | 0.216766667  | 0.117466667  |
| BRF1         | 0.1538       | 0.0676       | 0.079566667  | -0.042       |
| PAPOLA       | 0.066666667  | 0.040466667  | 0.047133333  | -0.149133333 |
| NAPB         | -0.2136      | -0.1755      | 0.2671       | -0.2135      |
| CLDN23       | -0.018833333 | -0.061266667 | -0.081533333 | -0.182433333 |
| DGCR14       | 0.2079       | 0.016133333  | -0.0261      | -0.081966667 |
| MKKS         | 0.260433333  | 0.296966667  | 0.230233333  | 0.101333333  |
| ZNF518A      | 0.083433333  | 0.045        | 0.014233333  | -0.086766667 |
| MGC39900     | 0.079366667  | 0.1732       | 0.1545       | -0.0514      |
| RPL28        | -0.050233333 | -0.143466667 | 0.079733333  | -0.169833333 |
| BCL2L12      | 0.067633333  | 0.2267       | 0.1947       | 0.005666667  |
| MED17        | 0.103        | 0.082966667  | 0.103466667  | -0.1654      |
| C1orf123     | -0.172266667 | -0.0387      | -0.065766667 | -0.254133333 |
| C20orf7      | 0.3251       | 0.301233333  | 0.108533333  | 0.171133333  |
| TPX2         | 0.313966667  | 0.197966667  | 0.049366667  | -0.017033333 |
| MAPRE1       | 0.1964       | 0.187833333  | 0.191        | 0.1045       |
| FAM10A7      | 0.027        | -0.117266667 | -0.0224      | -0.281666667 |
| PYROXD1      | 0.075333333  | 0.077033333  | 0.1667       | -0.089566667 |
| AEBP2        | 0.1286       | 0.1427       | 0.257433333  | -0.029466667 |
| LOC642585    | 0.1602       | 0.168833333  | 0.116166667  | -0.0005      |
| CARD8        | 0.1031       | 0.256933333  | 0.126666667  | 0.027966667  |
| HCFC1        | 0.2042       | 0.044866667  | -0.0169      | -0.032166667 |



|              |              |              |              |              |
|--------------|--------------|--------------|--------------|--------------|
| LOC100128269 | 0.0337       | 0.0366       | 0.085433333  | -0.157       |
| FLJ36848     | 0.0748       | 0.036866667  | 0.100666667  | -0.1119      |
| IL17RA       | 0.044766667  | 0.120366667  | 0.029133333  | 0.0021       |
| ARHGAP25     | -0.0599      | 0.1625       | 0.303066667  | 0.014533333  |
| LOC729495    | 0.073666667  | -0.1456      | 0.1912       | -0.095       |
| CTH          | -0.5422      | -0.3886      | -0.2277      | -0.447566667 |
| RRP1         | 0.232933333  | 0.25         | 0.1939       | 0.157666667  |
| NOTCH1       | 0.1605       | 0.152533333  | -0.154366667 | 0.015333333  |
| SRGAP2       | 0.194733333  | 0.1157       | 0.1381       | -0.079533333 |
| OAS2         | -0.053233333 | 0.0572       | 0.1755       | -0.134766667 |
| LOC100129522 | 0.0541       | 0.074966667  | 0.018433333  | -0.123466667 |
| IFITM2       | -0.182566667 | -0.036866667 | 0.191866667  | -0.189466667 |
| RPL12        | 0.0718       | -0.049233333 | 0.0088       | -0.118066667 |
| NARS         | -0.181333333 | 0.0524       | -0.0373      | -0.1175      |
| LUZP1        | 0.2104       | 0.178866667  | 0.0881       | 0.0979       |
| GAGE12D      | -0.0197      | 0.121166667  | 0.136666667  | -0.066866667 |
| FKBP4        | 0.286966667  | 0.2007       | 0.2291       | 0.057233333  |
| MED11        | -0.008366667 | 0.060666667  | 0.069433333  | -0.145766667 |
| LIN54        | 0.1374       | 0.001133333  | 0.128        | 0.017633333  |
| POLRMT       | 0.1208       | 0.205333333  | 0.126366667  | -0.122533333 |
| C1orf159     | 0.095766667  | 0.220366667  | 0.257466667  | 0.0885       |
| ABCE1        | 0.536433333  | 0.1745       | 0.325966667  | 0.266466667  |
| SLC46A1      | 0.0346       | 0.369233333  | 0.139966667  | 0.010633333  |
| NANP         | 0.241666667  | 0.221        | 0.1224       | -0.049833333 |
| CHIC1        | 0.116833333  | 0.087233333  | 0.095566667  | 0.013566667  |
| NUDT19       | 0.229        | 0.193366667  | 0.137333333  | 0.156666667  |
| TRAFD1       | 0.041966667  | 0.056066667  | -0.004       | -0.0908      |
| LOC727987    | 0.102266667  | 0.1576       | 0.262566667  | 0.0093       |
| LOC100133033 | 0.2369       | -0.080633333 | 0.075266667  | -0.035       |
| HGSNAT       | 0.1543       | 0.187566667  | -0.076933333 | -0.119566667 |
| ARL6IP5      | -0.130366667 | 0.041866667  | 0.070466667  | -0.1865      |
| TMEM168      | 0.0648       | 0.081333333  | 0.004333333  | -0.002333333 |
| METT11D1     | 0.0828       | 0.039233333  | 0.114433333  | 0.100233333  |
| PI4KAP1      | 0.066033333  | -0.058266667 | 0.0293       | -0.1324      |
| LOC391132    | 0.2022       | -0.010233333 | 0.2069       | 0.0235       |
| RSAD1        | -0.0653      | 0.024533333  | 0.018566667  | -0.100966667 |
| LOC440341    | 0.013266667  | -0.112233333 | -0.140333333 | -0.287866667 |
| LOC100130943 | 0.004233333  | 0.006666667  | 0.134433333  | -0.1165      |
| LOC728428    | -0.011533333 | -0.004966667 | 0.152866667  | 0.025166667  |
| INTS6        | 0.156333333  | 0.164666667  | 0.082566667  | -0.060333333 |
| PCNX         | 0.131833333  | -0.0021      | 0.114666667  | -0.1448      |
| LOC653803    | 0.277133333  | 0.0627       | 0.0745       | -0.0281      |
| LOC644363    | 0.1207       | 0.002266667  | 0.156466667  | -0.1013      |
| USP13        | 0.109966667  | 0.246566667  | 0.056        | -0.0291      |
| ZNF28        | 0.029333333  | 0.130833333  | -0.004366667 | -0.1153      |
| LRAP         | 0.112866667  | 0.175933333  | 0.259566667  | -0.011833333 |
| RGMA         | -0.080966667 | 0.005633333  | 0.055566667  | -0.2028      |

|              |              |              |              |              |
|--------------|--------------|--------------|--------------|--------------|
| DYNC1I2      | 0.0048       | 0.093833333  | -0.054366667 | -0.1649      |
| CTBS         | -0.230366667 | 0.0383       | 0.084833333  | -0.3419      |
| LOC652815    | -0.058733333 | -0.031633333 | -0.061166667 | -0.245866667 |
| TMCO6        | 0.043366667  | 0.062233333  | 0.142166667  | -0.0972      |
| NDUFB3       | 0.165433333  | 0.056133333  | 0.1372       | -0.011266667 |
| LOC644919    | 0.145366667  | 0.0784       | -0.019866667 | -0.008333333 |
| FER          | 0.066966667  | 0.104966667  | 0.1396       | 0.0953       |
| STRN4        | 0.165233333  | 0.129133333  | 0.059966667  | 0.0268       |
| ANAPC5       | -0.014966667 | 0.136966667  | 0.012333333  | -0.1251      |
| C2orf37      | -0.058466667 | -0.018633333 | 0.046433333  | -0.2121      |
| MRPS34       | 0.212633333  | 0.023766667  | 0.179033333  | -0.107433333 |
| FADS3        | 0.109266667  | 0.118733333  | -0.120633333 | -0.075       |
| LOC100130003 | 0.1894       | 0.158333333  | 0.145866667  | -0.119166667 |
| ARL5B        | 0.096766667  | 0.2006       | 0.079366667  | -0.054266667 |
| CPSF6        | 0.1419       | 0.0267       | 0.132566667  | 0.014966667  |
| HEXDC        | -0.223733333 | -0.005933333 | 0.038466667  | -0.2082      |
| KCNS3        | -0.094466667 | 0.294066667  | -0.007233333 | -0.1187      |
| DARS2        | 0.075366667  | 0.2081       | 0.1214       | -0.1137      |
| XRN2         | 0.018233333  | 0.0098       | 0.134966667  | -0.081966667 |
| PHKA1        | 0.156066667  | 0.011266667  | 0.205        | -0.019166667 |
| TRRAP        | 0.054766667  | 0.062833333  | 0.077366667  | -0.0681      |
| LOC284821    | -0.073666667 | -0.1143      | 0.164866667  | -0.2562      |
| MYOF         | 0.579333333  | 0.146566667  | -0.588166667 | -0.133733333 |
| SNRPD1       | 0.1867       | 0.162933333  | 0.200566667  | -0.081233333 |
| SLC25A44     | 0.227        | 0.101466667  | 0.183533333  | 0.1457       |
| BPGM         | 0.3763       | -0.044833333 | 0.0599       | 0.110766667  |
| BTBD7        | 0.080666667  | 0.136366667  | 0.1113       | 0.008966667  |
| MRPS23       | 0.3596       | 0.098566667  | 0.1829       | 0.168633333  |
| ACAD9        | 0.085466667  | 0.0159       | 0.097566667  | -0.230366667 |
| UPF3B        | 0.304766667  | 0.082        | -0.0144      | -0.0294      |
| CDKN1C       | -0.1432      | 0.019433333  | 0.076266667  | -0.085966667 |
| FAF1         | 0.246        | -0.031       | 0.2337       | -0.0189      |
| LZTS2        | 0.098533333  | -0.1563      | -0.0415      | -0.068266667 |
| KCNJ10       | 0.3043       | 0.109433333  | 0.098466667  | 0.0726       |
| EIF1AX       | 0.069866667  | 0.3369       | 0.075866667  | -0.0053      |
| CCNYL1       | 0.388133333  | 0.371133333  | 0.194366667  | 0.181733333  |
| CXorf23      | -0.072933333 | 0.137333333  | 0.089933333  | -0.154       |
| LOC730183    | -0.1925      | -0.018033333 | 0.225033333  | -0.184366667 |
| LRRC44       | -0.118033333 | 0.059233333  | 0.002633333  | -0.270033333 |
| ERI1         | 0.2627       | 0.1101       | 0.099766667  | 0.0382       |
| PALLD        | 0.729466667  | 0.194633333  | -0.601733333 | -0.028233333 |
| NDUFB5       | -0.107933333 | -0.007066667 | 0.025066667  | -0.201733333 |
| CNTNAP3B     | 0.166466667  | 0.106866667  | 0.0783       | -0.037266667 |
| GORASP2      | 0.245866667  | 0.128766667  | 0.1008       | -0.000533333 |
| TXNDC12      | 0.1304       | 0.180733333  | 0.116233333  | -0.0613      |
| SIPA1L3      | 0.169566667  | 0.033733333  | 0.010166667  | -0.0899      |
| MAP4K5       | 0.1686       | -0.0454      | -0.083666667 | -0.127966667 |

|           |              |              |              |              |
|-----------|--------------|--------------|--------------|--------------|
| ALKBH4    | 0.0286       | 0.023333333  | 0.0228       | -0.1894      |
| TOE1      | 0.210833333  | 0.238533333  | 0.3214       | 0.1247       |
| IGFBP2    | 0.008266667  | 0.166066667  | 0.168533333  | -0.0655      |
| MRPS30    | 0.285533333  | 0.2377       | 0.2238       | 0.132066667  |
| LOC728492 | 0.0661       | 0.0847       | 0.044133333  | 0.009566667  |
| C5orf32   | 0.082966667  | -0.1272      | 0.041466667  | -0.0383      |
| EMX2OS    | -0.005666667 | -0.0316      | 0.163166667  | 2.31E-18     |
| UBAP2L    | -0.269533333 | 0.066933333  | 0.081066667  | -0.300533333 |
| LOC441484 | 0.2046       | 0.1332       | 0.1412       | -0.0036      |
| HARBI1    | -0.0064      | 0.045533333  | 0.003966667  | -0.094833333 |
| CAT       | -0.314566667 | -0.030733333 | -0.1236      | -0.474666667 |
| IRF2BP1   | 0.209166667  | 0.037233333  | 0.052933333  | -0.060366667 |
| HMGB1     | 0.2225       | 0.034666667  | 0.106733333  | 0.125066667  |
| CHM       | -0.112833333 | -0.032033333 | 0.159333333  | -0.178233333 |
| TAF4      | 0.220066667  | 0.168166667  | 0.083533333  | 0.071166667  |
| PER2      | 0.354033333  | 0.2188       | 0.032366667  | 0.244033333  |
| SGSM3     | 0.074533333  | 0.003833333  | 0.0576       | -0.108666667 |
| ZSCAN29   | 0.035433333  | 0.054666667  | 0.0992       | -0.0212      |
| LOC647009 | 0.275166667  | 0.159233333  | 0.249866667  | 0.121633333  |
| C14orf138 | 0.188666667  | -0.030766667 | 0.007733333  | -0.1027      |
| CXADR     | 0.0972       | 0.095033333  | 0.175266667  | -0.120966667 |
| NFATC3    | 0.103066667  | 0.028733333  | 0.126833333  | -0.085266667 |
| UTP20     | 0.133366667  | 0.299366667  | 0.2012       | 0.0054       |
| RPS26L    | 0.1852       | 0.1804       | 0.165466667  | -0.016966667 |
| UTP14A    | 0.1953       | 0.201666667  | 0.282666667  | 0.0732       |
| MRPS7     | 0.106        | 0.061233333  | 0.206333333  | 0.013666667  |
| SUV420H1  | 0.273166667  | 0.076666667  | 0.0911       | 0.031766667  |
| LYSMD1    | 0.042933333  | -0.073833333 | 0.2318       | 0.0276       |
| THEM5     | 0.211633333  | 0.1741       | 0.0689       | 0.1022       |
| TRUB1     | 0.115333333  | 0.113366667  | 0.087966667  | -0.094333333 |
| C14orf11  | -0.171366667 | -0.0235      | -0.026       | -0.241033333 |
| MFN2      | 0.039633333  | 0.085033333  | 0.083166667  | -0.1526      |
| LOC644096 | 0.194966667  | 0.113133333  | 0.064633333  | -0.125033333 |
| LGALS9B   | 0.144333333  | 0.037733333  | 0.0977       | -0.086966667 |
| XAF1      | -0.203133333 | -0.042633333 | -0.000733333 | -0.0489      |
| MOBK1B    | 0.266733333  | 0.353333333  | 0.152233333  | 0.0806       |
| LOC643896 | 0.051066667  | 0.119266667  | 0.054366667  | -0.216233333 |
| KEAP1     | -0.074866667 | 0.032866667  | -0.092266667 | -0.153533333 |
| TMEM160   | 0.013766667  | -0.000433333 | 0.168666667  | -0.156766667 |
| MLF1IP    | 0.210333333  | 0.1172       | 0.101        | 0.0122       |
| C10orf76  | -0.032366667 | -0.157266667 | 0.100333333  | -0.259133333 |
| GPATCH4   | 0.344566667  | 0.251133333  | 0.198166667  | 0.2281       |
| TSR2      | 0.189766667  | 0.0836       | 0.056966667  | -0.034066667 |
| CRYZL1    | 0.060733333  | -0.092166667 | 0.063666667  | -0.1753      |
| CIRBP     | 0.032866667  | -0.1733      | -0.1868      | -0.148633333 |
| DMXL1     | -0.165533333 | 0.012066667  | -0.0067      | -0.254833333 |
| C1orf124  | 0.267366667  | 0.109666667  | 0.257366667  | 0.0883       |

|              |              |              |              |              |
|--------------|--------------|--------------|--------------|--------------|
| RPL23AP7     | 0.239533333  | 0.158466667  | 0.005266667  | -0.109433333 |
| GLA          | 0.087066667  | 0.032566667  | -0.0491      | -0.108633333 |
| PCNT         | 0.1617       | 0.0055       | 0.062933333  | -0.1013      |
| C10orf119    | 0.2182       | 0.335133333  | 0.282966667  | 0.255166667  |
| TBL3         | 0.162733333  | 0.154        | 0.0505       | -0.064466667 |
| PUM1         | 0.1155       | 0.0622       | 0.1787       | -0.1014      |
| ZNF480       | -0.023733333 | 0.193066667  | 0.093133333  | 0.0838       |
| TBC1D25      | 0.101666667  | 0.015366667  | 0.243933333  | 0.103333333  |
| ATP5J2       | 0.0238       | 0.167233333  | 0.220033333  | 0.0094       |
| WDR81        | -0.164133333 | -0.077766667 | 0.034766667  | -0.1594      |
| DHCR7        | -0.022833333 | 0.143366667  | 0.529333333  | 0.289466667  |
| CCDC45       | -0.1042      | -0.094333333 | -0.026966667 | -0.159533333 |
| FRG1         | 0.111466667  | 0.094166667  | 0.0927       | -0.162933333 |
| TIMM9        | 0.153066667  | 0.108933333  | 0.012033333  | 0.026866667  |
| LOC100132499 | 0.026166667  | -0.124033333 | -0.006666667 | -0.236433333 |
| TRMT1        | 0.126066667  | 0.141533333  | 0.072833333  | 0.025333333  |
| ARID4A       | 0.089666667  | 0.034933333  | 0.1216       | -0.0994      |
| GMPS         | 0.258833333  | 0.058733333  | 0.204966667  | 0.086666667  |
| ZMPSTE24     | 0.1015       | 0.108666667  | -0.027433333 | -0.1847      |
| KIF2A        | 0.2804       | 0.1766       | 0.1604       | 0.079266667  |
| C20orf94     | -0.192033333 | 0.0533       | -0.093133333 | -0.287433333 |
| LOC645058    | 0.082333333  | 0.036133333  | 0.1639       | -0.0839      |
| TCP11L1      | 0.086666667  | 0.1281       | 0.012766667  | -0.036366667 |
| PLA2G12A     | -0.0428      | 0.1451       | -0.0613      | -0.228266667 |
| OSBPL11      | 0.228433333  | 0.1532       | 0.0435       | 0.038733333  |
| CCDC120      | 0.1571       | -0.063066667 | -0.084666667 | -0.256366667 |
| LOC644511    | -0.0511      | -0.096533333 | 0.1313       | -0.176566667 |
| SERBP1       | 0.280166667  | 0.0053       | 0.145833333  | 0.044766667  |
| LOC650276    | 0.1274       | 0.007166667  | 0.051866667  | -0.047533333 |
| ZNF688       | -0.195333333 | -0.087633333 | -0.0303      | -0.271933333 |
| EEF1AL7      | 0.071833333  | 0.003433333  | 0.034633333  | -0.179166667 |
| COPA         | 0.023533333  | -0.028766667 | -0.068066667 | -0.234533333 |
| APOBEC3B     | 0.262466667  | 0.2273       | 0.2205       | 0.082933333  |
| LOC729301    | 0.082133333  | 0.169466667  | 0.0388       | -0.0291      |
| ZNF343       | 0.138533333  | 0.0442       | 0.0897       | 0.091133333  |
| NME1         | 0.1415       | 0.187633333  | 0.105233333  | 0.009733333  |
| LOC653773    | -0.136766667 | 0.010066667  | 0.051233333  | -0.192       |
| HRB          | 0.2641       | 0.285866667  | 0.271833333  | 0.0685       |
| GPX4         | -0.073633333 | -0.030933333 | 0.039        | -0.0868      |
| PRKAG1       | 0.017566667  | -0.004366667 | -0.0294      | -0.147466667 |
| LOC730081    | 0.004966667  | 0.050266667  | 0.1663       | -0.152966667 |
| OR2A9P       | 0.000366667  | 0.012933333  | 0.0259       | -0.1637      |
| LOC401076    | 0.347333333  | 0.252266667  | 0.055233333  | 0.046133333  |
| CHST3        | 0.3755       | 0.079166667  | -0.0347      | 0.012966667  |
| POLR2J       | 0.1969       | 0.151333333  | 0.1066       | 0.088033333  |
| BCAP31       | 0.006466667  | 0.090766667  | -0.011833333 | -0.0337      |
| LOC441511    | 0.129666667  | 0.015833333  | 0.079266667  | 0.0477       |

|              |              |              |              |              |
|--------------|--------------|--------------|--------------|--------------|
| FBXO3        | -0.006633333 | 0.0256       | 0.162066667  | -0.079333333 |
| SAP130       | 0.107666667  | 0.053533333  | 0.0815       | -0.077833333 |
| CHD1         | 0.0966       | 0.036233333  | 0.383966667  | 0.002366667  |
| ARHGEF1      | -0.002633333 | 0.061866667  | -0.020633333 | -0.0908      |
| KLRG1        | 0.085766667  | 0.0086       | 0.166166667  | -0.1685      |
| ACTL6A       | 0.256233333  | 0.1384       | 0.028966667  | -0.005766667 |
| RDH14        | -0.005933333 | 0.030533333  | 0.0614       | -0.082333333 |
| STIP1        | 0.216666667  | 0.353933333  | 0.193966667  | -0.017266667 |
| HNRNPAB      | 0.426933333  | 0.161133333  | 0.261133333  | 0.1848       |
| WDR21A       | 0.035733333  | 0.114033333  | 0.139033333  | -0.1131      |
| PWP2         | 0.204733333  | 0.175466667  | 0.320266667  | 0.063166667  |
| YTHDC1       | -0.028666667 | 0.010033333  | 0.018166667  | -0.1057      |
| WIPI1        | -0.1693      | -0.0873      | 0.2225       | -0.165366667 |
| TP53INP1     | -0.179433333 | -0.2453      | 0.1169       | -0.172433333 |
| PIK3R2       | -0.081066667 | -0.157066667 | 0.2065       | -0.1786      |
| TFF2         | -0.0544      | 0.229266667  | 0.1005       | -0.142033333 |
| NCL          | 0.375666667  | 0.087333333  | 0.295266667  | 0.194433333  |
| RBM42        | 0.2646       | 0.068233333  | -0.028166667 | 0.040766667  |
| MTHFD2       | -0.156333333 | -0.020166667 | -0.2147      | -0.227933333 |
| LOC285407    | -0.116133333 | 0.3084       | 0.020966667  | -0.141833333 |
| STK3         | 0.102733333  | 0.1251       | -0.016333333 | -0.116033333 |
| LOC389901    | 0.109266667  | 0.258833333  | -0.0359      | -0.006733333 |
| LOC644039    | 0.034633333  | 0.000533333  | -0.113566667 | -0.2341      |
| C17orf88     | 0.2086       | -0.021233333 | -0.063866667 | -0.0295      |
| SNORD56      | 0.254733333  | 0.420266667  | 0.319833333  | 0.003266667  |
| MTHFS        | 0.042566667  | -0.048433333 | 0.048433333  | -0.1297      |
| C1orf25      | -0.122833333 | 0.050666667  | -0.133233333 | -0.306033333 |
| RAB11FIP1    | -0.018966667 | -0.1322      | 0.063633333  | -0.1026      |
| C1orf52      | 0.206233333  | 0.111766667  | -0.025633333 | 0.034033333  |
| LOC100129362 | 0.1803       | 0.2777       | 0.297833333  | 0.055533333  |
| THRAP3       | 0.2384       | 0.0795       | 0.071466667  | 0.103166667  |
| C1orf86      | -0.0188      | -0.040933333 | 0.1164       | -0.194466667 |
| DSCR3        | -0.0455      | -0.0734      | 0.072333333  | -0.0698      |
| C19orf50     | 0.124366667  | 0.136566667  | -0.011833333 | -0.108866667 |
| XRCC6        | -0.0201      | 0.1276       | 0.2289       | -0.1485      |
| TRAPPC2L     | -0.089433333 | -0.039866667 | -0.048333333 | -0.1737      |
| COPG         | 0.0095       | -0.064266667 | -0.0941      | -0.147866667 |
| DDR1         | 0.130333333  | -0.075366667 | -0.2798      | -0.179133333 |
| CASP3        | 0.528666667  | 0.299733333  | 0.478233333  | 0.312133333  |
| FAM179B      | -0.105       | 0.027366667  | -0.047966667 | -0.234033333 |
| FAM3C        | 0.4885       | 0.316366667  | 0.113433333  | 0.028133333  |
| ANKRD37      | 0.268233333  | 0.152466667  | 0.0712       | -0.2576      |
| BLVRA        | 0.006066667  | 0.0514       | 0.2836       | -0.086933333 |
| PES1         | 0.2689       | 0.1558       | 0.039133333  | 0.011466667  |
| LOC100130561 | 0.393233333  | 0.2888       | 0.002        | 0.078266667  |
| WASH1        | 0.0031       | -0.0247      | 0.0909       | -0.042166667 |
| RPL39L       | 0.1071       | 0.2042       | 0.17         | -0.0632      |

|           |              |              |              |              |
|-----------|--------------|--------------|--------------|--------------|
| SLK       | 0.082        | 0.066466667  | 0.1803       | 0.0235       |
| KLHL23    | 0.243666667  | 0.2009       | 0.187366667  | 0.061533333  |
| C1orf212  | 0.221866667  | 0.244566667  | 0.1482       | 0.0066       |
| LEPRE1    | 0.0429       | 0.053066667  | -0.176733333 | -0.173633333 |
| LOC731096 | 0.0303       | -0.089133333 | 0.079133333  | -0.236233333 |
| RPE       | 0.1504       | 0.229666667  | 0.284266667  | -0.012466667 |
| TMEM63A   | 0.1381       | 0.185633333  | 0.053233333  | -0.024166667 |
| LOC728257 | 0.2373       | 0.330233333  | 0.017966667  | -0.148433333 |
| TOP3B     | -0.076966667 | 0.0546       | -0.114833333 | -0.1314      |
| PDS5B     | 0.003833333  | 0.125133333  | 0.086433333  | -0.176266667 |
| POGK      | 0.0589       | 0.088533333  | 0.0492       | -0.143666667 |
| PRMT10    | 0.123666667  | 0.091633333  | -0.0425      | -0.0655      |
| PRKRIR    | 0.1187       | 0.032266667  | 0.0665       | -0.0304      |
| GMIP      | 0.026133333  | 0.027966667  | 0.164366667  | -0.100033333 |
| C10orf2   | 0.202533333  | 0.231666667  | 0.226133333  | 0.078766667  |
| CPEB1     | -0.1902      | -0.154933333 | -0.072266667 | -0.3171      |
| LOC650034 | 0.059933333  | 0.110366667  | 0.3425       | 0.0889       |
| PFKFB2    | -0.129866667 | -0.0528      | 0.0997       | -0.1339      |
| ARF6      | 0.22         | 0.0984       | 0.042066667  | -0.048533333 |
| LOC653066 | 0.0415       | 0.038766667  | 0.1335       | -0.1119      |
| NOLA1     | 0.1082       | 0.089333333  | 0.0506       | -0.092633333 |
| NDUFB11   | -0.0469      | 0.0183       | 0.146266667  | -0.1812      |
| GNB1      | 0.233433333  | 0.0976       | 0.030033333  | -0.089933333 |
| CRYBA2    | 0.255033333  | 0.166166667  | 0.185266667  | 0.0219       |
| TMEM65    | 0.139133333  | 0.0589       | -0.011733333 | -0.151066667 |
| LOC643308 | -0.224933333 | 0.0191       | -0.241933333 | -0.339433333 |
| ZNF589    | 0.0598       | 0.000833333  | 0.044066667  | 0.017066667  |
| WASF2     | 0.035033333  | 0.109066667  | -0.014       | -0.176766667 |
| FAM118B   | 0.176        | 0.054233333  | 0.1244       | -0.019666667 |
| LOC730455 | 0.165733333  | 0.005233333  | 0.222233333  | -0.075966667 |
| POLR3E    | 0.298        | 0.1812       | 0.1522       | 0.1201       |
| C14orf166 | 0.024733333  | 0.105166667  | 0.0275       | -0.1107      |
| MLLT10    | 0.0934       | 0.0169       | 0.022766667  | -0.138633333 |
| CDC40     | 0.066033333  | -0.050066667 | 0.096833333  | -0.084533333 |
| CIC       | 0.148833333  | -0.088866667 | -0.018       | -0.0857      |
| MRPL12    | 0.230366667  | 0.173933333  | 0.1882       | 0.031533333  |
| CLK2      | -0.0445      | 0.053333333  | 0.217566667  | -0.082833333 |
| FAM75C1   | 0.1983       | -0.060633333 | 0.099        | -0.006533333 |
| NMRAL1    | -0.122766667 | 0.089366667  | 0.119766667  | -0.1147      |
| LHFPL2    | 0.0339       | 0.190766667  | 0.073766667  | -0.226366667 |
| FEM1B     | 0.053133333  | 0.0773       | 0.1297       | -0.113666667 |
| LOC728229 | 0.224133333  | -0.106033333 | 0.026333333  | -0.011266667 |
| LOC729020 | 0.0863       | 0.299933333  | 0.149866667  | -0.122666667 |
| LPIN1     | -0.044666667 | -0.1159      | 0.095933333  | -0.091666667 |
| MORG1     | 0.1323       | 0.043266667  | 0.061166667  | -0.0951      |
| TIMM8A    | 0.3921       | 0.440833333  | 0.3884       | 0.279033333  |
| KCNH6     | 0.119933333  | 0.196633333  | 0.355566667  | 0.1041       |

|           |              |              |              |              |
|-----------|--------------|--------------|--------------|--------------|
| SETD3     | 0.221866667  | 0.1476       | 0.015733333  | -0.118466667 |
| TXLNA     | 0.0976       | 0.025766667  | -0.048266667 | -0.1164      |
| CUL4B     | -0.043433333 | 0.1617       | -0.028866667 | -0.225133333 |
| FAM164C   | -0.0448      | 0.072866667  | 0.2355       | -0.019666667 |
| ARMC5     | 0.185066667  | 0.1534       | 0.036166667  | 0.0104       |
| MYO9A     | -0.063766667 | 0.063833333  | 0.038166667  | -0.3022      |
| ADSSL1    | 0.191033333  | 0.100533333  | 0.108966667  | -0.0859      |
| ARHGEF18  | 0.138166667  | 0.0871       | -0.0926      | -0.085766667 |
| LOC648771 | -0.061333333 | -0.065066667 | -0.048966667 | -0.3401      |
| JARID2    | -0.126166667 | 0.0412       | 0.198066667  | -0.176633333 |
| C17orf100 | -0.088233333 | -0.0501      | -0.041433333 | -0.197033333 |
| DOCK2     | 0.041033333  | 0.073366667  | 0.223233333  | 0.040933333  |
| NDUFB6    | 0.0834       | 0.084233333  | 0.181033333  | -0.1552      |
| AURKAIP1  | 0.249266667  | 0.212733333  | 0.099166667  | 0.0241       |
| GNG5      | 0.3347       | 0.062766667  | 0.1386       | 0.1219       |
| SESTD1    | -0.058566667 | 0.100666667  | 0.261566667  | -0.099133333 |
| HOXC9     | 0.2118       | 0.1086       | -0.0434      | -0.123633333 |
| CHD4      | -0.030166667 | -0.051166667 | 0.038466667  | -0.234966667 |
| DARS      | -0.034066667 | 0.1673       | 0.0405       | -0.171466667 |
| BCL2L13   | 0.003966667  | 0.013533333  | -0.120366667 | -0.1438      |
| ABI1      | -0.2734      | -0.203733333 | 0.0103       | -0.2362      |
| HSD17B8   | -0.2228      | -0.078933333 | 0.0732       | -0.293133333 |
| SIGIRR    | 0.0825       | 0.015166667  | 0.2466       | -0.0274      |
| ELMO2     | 0.007133333  | 0.1939       | 0.122333333  | 0.003933333  |
| EZH2      | 0.0762       | 0.279233333  | 0.220433333  | -0.0863      |
| PTP4A1    | 0.163533333  | 0.1558       | 0.1156       | 0.0342       |
| FBXL6     | 0.181233333  | 0.246833333  | 0.143933333  | -0.022766667 |
| CHCHD8    | 0.0864       | 0.172733333  | 0.173533333  | -0.042266667 |
| SEC61A1   | 0.157866667  | 0.1589       | -0.104666667 | -0.194866667 |
| FUS       | 0.163733333  | 0.154633333  | 0.311866667  | 0.1566       |
| PIP4K2C   | -0.0298      | -0.065666667 | 0.2281       | -0.1308      |
| ZNF320    | -0.183266667 | 0.226266667  | 0.1443       | -0.225566667 |
| TFB1M     | 0.2163       | 0.3454       | 0.360633333  | 0.0216       |
| TOR2A     | -0.035866667 | 0.102733333  | 0.0674       | -0.129966667 |
| HNRNPF    | 0.2641       | 0.2091       | 0.337633333  | 0.1266       |
| MBD3      | 0.0362       | 0.0942       | 0.014933333  | 0.0024       |
| ZNF286A   | 0.318933333  | 0.068633333  | -0.097833333 | 0.053033333  |
| TMEM69    | 0.138233333  | 0.0189       | 0.074        | -0.127366667 |
| LOC644914 | -0.033333333 | 0.0509       | -0.0152      | -0.249033333 |
| LOC387703 | 0.156533333  | 0.157533333  | 0.1786       | 0.0534       |
| CORO7     | 0.2222       | 0.003733333  | 0.028633333  | -0.030866667 |
| CTCF      | 0.174        | 0.038366667  | 0.120066667  | -0.028066667 |
| LOC643446 | 0.2939       | 0.0529       | 0.123833333  | -0.0591      |
| LRRFIP1   | 0.044533333  | 0.5316       | 0.2471       | 0.0236       |
| LSM11     | 0.099266667  | 0.0836       | 0.067866667  | -0.0757      |
| MBNL2     | -0.0798      | -0.261866667 | -0.425066667 | -0.518133333 |
| C16orf88  | 0.056133333  | 0.071433333  | 0.1856       | -0.129733333 |

|              |              |              |              |              |
|--------------|--------------|--------------|--------------|--------------|
| GLTSCR2      | -0.059933333 | -0.0677      | 0.0723       | -0.289266667 |
| TRAF4        | 0.330766667  | 0.109666667  | 0.2518       | 0.002833333  |
| KDM3B        | 0.1306       | 0.0105       | -0.045933333 | -0.0599      |
| RPL23A       | 0.069166667  | -0.1041      | 0.008433333  | -0.161733333 |
| HSP90B1      | 0.0368       | -0.016233333 | 0.012866667  | -0.251933333 |
| OSBPL5       | 0.111633333  | -0.0187      | -0.084233333 | -0.2629      |
| INPPL1       | 0.097066667  | -0.026833333 | -0.2133      | -0.209466667 |
| CBX8         | 0.148266667  | 0.084066667  | 0.021666667  | -0.045633333 |
| MFSD6        | -0.0378      | -0.1197      | 0.175633333  | -0.290566667 |
| DONSON       | 0.2608       | 0.224566667  | 0.156633333  | 0.093533333  |
| CLN6         | 0.0697       | 0.0882       | 0.154333333  | -0.0249      |
| RHOC         | 0.472166667  | 0.4063       | -0.0997      | 0.0554       |
| KIAA1522     | -0.023633333 | 0.0063       | 0.1857       | 0.022533333  |
| LRRC41       | 0.033533333  | -0.004966667 | 0.093633333  | -0.001       |
| RECQL        | -0.054533333 | 0.333333333  | 0.191333333  | -0.127633333 |
| RIC8B        | 0.183466667  | 0.077366667  | 0.097233333  | 0.1119       |
| CUL1         | 0.252166667  | 0.166333333  | 0.080166667  | -0.0445      |
| PIAS4        | 0.190833333  | 0.0061       | -0.004       | -0.086966667 |
| PLRG1        | 0.0762       | 0.1593       | 0.143666667  | -0.0782      |
| FBXO31       | 0.115066667  | -0.085733333 | 0.037766667  | -0.038       |
| SERPINH1     | 0.105066667  | 0.157566667  | -0.127133333 | -0.068433333 |
| C10orf125    | 0.102166667  | 0.1382       | 0.124433333  | -0.029366667 |
| HIC2         | 0.2179       | 0.081733333  | 0.190266667  | 0.011566667  |
| DNAJC11      | 0.257166667  | 0.164533333  | 0.115066667  | -0.000566667 |
| LOC100130387 | -0.032466667 | -0.0128      | 0.1463       | -0.1598      |
| RLF          | 0.280266667  | 0.215133333  | 0.107666667  | 0.116        |
| ARHGEF6      | 0.3172       | 0.2777       | -0.000866667 | -0.0068      |
| C18orf55     | 0.2738       | 0.347566667  | 0.0624       | -0.020733333 |
| PSMC6        | 0.054566667  | 0.353633333  | -0.0701      | -0.1969      |
| DGCR2        | 0.2385       | 0.121933333  | -0.0924      | -0.0154      |
| ZBTB8A       | 0.044466667  | 0.110233333  | -0.038066667 | -0.2186      |
| FSD1         | 0.1502       | 0.133933333  | 0.112866667  | -0.109866667 |
| LONP1        | 0.020833333  | -0.097133333 | -0.089866667 | -0.247533333 |
| C2orf29      | 0.088433333  | 0.076166667  | 0.15         | -0.1853      |
| C9orf46      | 0.185766667  | 0.134966667  | -0.014333333 | -0.097666667 |
| RFC5         | 0.180533333  | 0.132766667  | 0.143166667  | -0.000466667 |
| ARHGAP17     | 0.053633333  | -0.110133333 | -0.0716      | -0.223466667 |
| EARS2        | 0.167966667  | 0.154033333  | 0.0948       | -0.033133333 |
| C2orf7       | -0.024966667 | 0.118566667  | 0.173433333  | -0.239166667 |
| ANKRD29      | 0.082233333  | 0.1133       | -0.025933333 | -0.129766667 |
| SMARCA5      | 0.1213       | 0.120133333  | 0.112233333  | -0.090566667 |
| TIMM17A      | 0.215233333  | 0.1058       | 0.237766667  | -0.0152      |
| TM7SF3       | -0.1622      | 0.140166667  | 0.277566667  | -0.2416      |
| ALAD         | -0.296566667 | -0.133266667 | 0.1474       | -0.2604      |
| PIH1D2       | 0.120633333  | 0.181633333  | -0.0005      | -0.074633333 |
| SLC26A11     | -0.050766667 | 0.113333333  | 0.000533333  | -0.2189      |
| LOC644745    | 0.3175       | 0.254733333  | 0.095333333  | -0.0326      |



|              |              |              |              |              |
|--------------|--------------|--------------|--------------|--------------|
| GMPPA        | 0.394366667  | 0.034366667  | 0.0499       | -0.044633333 |
| GLE1         | 0.127        | 0.149433333  | 0.1968       | 0.0264       |
| PIM3         | 0.178033333  | 0.017666667  | 0.182433333  | -0.064233333 |
| FUNDC1       | 0.211766667  | 0.048066667  | 0.053066667  | -0.046666667 |
| IFT172       | -0.0528      | 0.0247       | -0.025233333 | -0.217166667 |
| NPM3         | 0.1814       | 0.099733333  | 0.151733333  | -0.054333333 |
| CEP164       | 0.200566667  | 0.111866667  | -0.0563      | -0.081166667 |
| LOC401805    | 0.150266667  | -0.058466667 | -0.128533333 | -0.260533333 |
| EHHADH       | -0.1355      | 0.061733333  | 0.032966667  | -0.303833333 |
| SH3GLB1      | 0.204566667  | 0.1082       | 0.0309       | -0.0626      |
| ABCC10       | 0.0577       | 0.0468       | 0.1166       | -0.029233333 |
| UAP1L1       | -0.0016      | -0.0148      | 0.009466667  | -0.174066667 |
| ARHGEF12     | -0.048233333 | 0.1211       | -0.050966667 | -0.2916      |
| DDEF2        | 0.3112       | 0.1949       | -0.017066667 | -0.0743      |
| NPPI         | -0.007133333 | -0.0035      | -0.064433333 | -0.1854      |
| XPO5         | 0.159933333  | 0.1952       | 0.1832       | 0.0079       |
| KRTCAP2      | 0.020166667  | -0.069966667 | -0.0876      | -0.247733333 |
| LOC100130892 | -0.605966667 | 0.4079       | -0.484       | -0.636633333 |
| LOC730740    | 0.013066667  | 0.0872       | 0.075866667  | -0.159933333 |
| LOC642333    | -0.0385      | 0.1578       | -0.0375      | -0.168466667 |
| FDPS         | 0.099066667  | 0.193666667  | 0.4203       | 0.112933333  |
| HECTD3       | 0.077766667  | 0.0008       | 0.055466667  | -0.092833333 |
| ORC1L        | 0.135766667  | 0.158566667  | 0.1921       | -0.062466667 |
| LOC728944    | 0.153233333  | 0.2346       | 0.1356       | 0.0829       |
| LOC100134301 | 0.117333333  | 0.036233333  | 0.2526       | -0.069566667 |
| FLJ20444     | 0.0629       | -0.034266667 | -0.0932      | -0.249433333 |
| NCBP2        | 0.1421       | 0.167833333  | 0.319133333  | 0.035        |
| MEIS1        | 0.109333333  | -0.006166667 | 0.067066667  | -0.138466667 |
| TMEM181      | 0.089566667  | 0.158366667  | 0.002933333  | -0.120166667 |
| C1orf83      | -0.0539      | 0.025766667  | 0.101133333  | -0.175533333 |
| LOC645015    | -0.064566667 | 0.166566667  | 0.1279       | -0.097066667 |
| LRDD         | 0.104533333  | 0.0686       | 0.093333333  | -0.059133333 |
| HBXIP        | 0.114466667  | 0.120533333  | 0.109466667  | -0.100566667 |
| GCNT6        | -0.053166667 | 0.1137       | 0.213133333  | -0.141233333 |
| SLC41A3      | -0.086933333 | -0.045033333 | 0.032233333  | -0.217766667 |
| NDUFA9       | 0.105066667  | 0.051866667  | 0.1639       | 0.0163       |
| SON          | 0.274133333  | 0.079266667  | 0.0663       | 0.048066667  |
| ARHGEF5      | 0.2075       | 0.141466667  | 0.040233333  | 0.042666667  |
| TIGD5        | 0.216333333  | 0.1226       | -0.016133333 | -0.141866667 |
| COL9A3       | 0.095566667  | 0.0871       | 0.211066667  | -0.110633333 |
| LMBR1        | -0.104566667 | 0.057266667  | 0.141266667  | -0.1102      |
| PLEKHO1      | 0.175333333  | -0.0956      | 0.268066667  | 0.0206       |
| CHCHD5       | 0.008933333  | 0.0019       | 0.143433333  | -0.0684      |
| PPP1R8       | 0.2607       | 0.261566667  | 0.1959       | 0.0317       |
| E4F1         | 0.075266667  | -0.0062      | -0.088966667 | -0.119066667 |
| LOC399748    | 0.2903       | 0.270266667  | 0.084366667  | 0.034033333  |
| PRR22        | 0.2026       | 0.118633333  | 0.048533333  | -0.0419      |

|              |              |              |              |              |
|--------------|--------------|--------------|--------------|--------------|
| HSPA4L       | 0.206633333  | 0.238566667  | 0.0811       | -0.016366667 |
| ZNF235       | -0.057133333 | 0.137166667  | 0.104033333  | -0.144333333 |
| TMEM57       | 0.194533333  | 0.0264       | 0.063366667  | -0.055466667 |
| POLQ         | 0.101066667  | 0.323066667  | 0.277666667  | 0.009033333  |
| TRAPPC4      | 0.2542       | 0.2441       | 0.045733333  | -0.020133333 |
| XPO1         | 0.0693       | 0.191433333  | 0.1469       | -0.108533333 |
| FAM119B      | -0.053266667 | 0.0053       | -0.1243      | -0.264133333 |
| CHKB         | 0.0109       | -0.107233333 | 0.0846       | -0.193033333 |
| HNRNPD       | 0.227566667  | 0.1878       | 0.204833333  | 0.078133333  |
| GJC2         | 0.282766667  | 0.033866667  | 0.131866667  | -0.077566667 |
| TMEM183A     | 0.018033333  | -0.051133333 | 0.133833333  | -0.170233333 |
| KIF5B        | 0.312666667  | 0.231733333  | 0.167866667  | 0.0416       |
| DDX59        | 0.0934       | -0.0721      | -0.0169      | 0.002533333  |
| TBCD         | -0.040533333 | 0.1401       | 0.186366667  | -0.169866667 |
| EHBP1        | 0.160433333  | 0.060466667  | 0.056433333  | -0.161633333 |
| SNORD36A     | 0.356266667  | 0.363966667  | 0.070166667  | 0.114033333  |
| TMPO         | 0.409366667  | 0.1659       | 0.0864       | 0.042033333  |
| MRPS15       | 0.0823       | 0.025        | 0.089266667  | -0.011233333 |
| ZNF428       | -0.0974      | 0.045166667  | 0.079233333  | -0.204033333 |
| SIN3B        | -0.1455      | 0.156633333  | 0.112533333  | -0.127       |
| TMEM110      | 0.184466667  | 0.1231       | 0.175933333  | -0.129533333 |
| PEA15        | 0.349266667  | 0.1544       | 0.027466667  | 0.023166667  |
| RHBDF1       | 0.095666667  | -0.032133333 | 0.188033333  | -0.0172      |
| C15orf41     | 0.032433333  | -0.016833333 | 0.092166667  | -0.3016      |
| C19orf29     | 0.194066667  | 0.151        | 0.015733333  | 0.0714       |
| CHMP4A       | -0.014433333 | -0.0475      | -0.118133333 | -0.167533333 |
| ZNF436       | -0.060433333 | -0.068533333 | -0.016433333 | -0.125866667 |
| ABCA2        | 0.0913       | 0.0752       | 0.042533333  | -0.1746      |
| TMEM5        | 0.029966667  | 0.089233333  | 0.185733333  | -0.001566667 |
| LOC100130308 | 0.074533333  | 0.200833333  | 0.112566667  | -0.0542      |
| LOC645175    | 0.287733333  | 0.224833333  | 0.184066667  | 0.0682       |
| PRPSAP1      | -0.030866667 | -0.028266667 | -0.0187      | -0.217433333 |
| PCDHGB6      | 0.2987       | -0.0443      | 0.225933333  | 0.106033333  |
| JRKL         | 0.137866667  | 0.025233333  | 0.0662       | -0.136933333 |
| TXNRD2       | 0.2066       | 0.1759       | -0.119233333 | 0.0235       |
| LOC143543    | 0.0688       | 0.192066667  | 0.045033333  | -0.219       |
| ZNF266       | 0.0525       | -0.012266667 | 0.056633333  | -0.1316      |
| MYO1E        | 0.1918       | 0.081666667  | 0.087666667  | -0.082233333 |
| FLRT3        | 0.425433333  | 0.590666667  | -0.265766667 | 0.0839       |
| DDB1         | 0.2828       | -0.0519      | -0.024266667 | -0.122       |
| FAM128A      | 0.1846       | -0.011333333 | 0.154166667  | -0.102666667 |
| SLC44A1      | -0.355766667 | -0.067933333 | 0.1217       | -0.317733333 |
| LOC652615    | 0.235033333  | 0.002733333  | 0.142333333  | -0.073       |
| LOC220433    | -0.1848      | 0.064533333  | -0.129633333 | -0.277033333 |
| C16orf53     | 0.2364       | 0.189        | 0.1497       | 0.045466667  |
| RPN1         | 0.1014       | 0.1728       | 0.000566667  | -0.0886      |
| FDX1L        | 0.0484       | 0.008366667  | 0.071666667  | -0.155166667 |

|              |              |              |              |              |
|--------------|--------------|--------------|--------------|--------------|
| MMP16        | 0.1534       | 0.258333333  | 0.2115       | 0.083266667  |
| COX7A2       | 0.150066667  | 0.147866667  | 0.169833333  | 0.0095       |
| TROVE2       | -0.0997      | -0.0847      | 0.3292       | -0.164133333 |
| MLEC         | -0.150666667 | 0.0583       | 0.008366667  | -0.2152      |
| LOC100131801 | -0.0393      | -0.018766667 | 0.153866667  | -0.169766667 |
| RER1         | -0.313766667 | -0.124633333 | 0.1452       | -0.294966667 |
| FLJ14166     | 0.2109       | 0.2492       | 0.1995       | 0.0018       |
| C14orf85     | 0.350633333  | 0.290633333  | 0.378466667  | 0.118        |
| DNCL1        | 0.127733333  | 0.239266667  | 0.0865       | -0.087       |
| SC4MOL       | -0.207833333 | 0.307166667  | 0.783266667  | 0.406066667  |
| ATXN3        | -0.0399      | 0.0468       | 0.0405       | -0.2003      |
| NEURL1B      | -0.016033333 | -0.0358      | 0.113366667  | -0.136       |
| ARD1A        | 0.0665       | 0.0377       | 0.120533333  | -0.132233333 |
| ZNF485       | 0.245566667  | 0.424966667  | 0.097466667  | 0.0617       |
| INPP1        | -0.1062      | 0.1437       | 0.286133333  | -0.060766667 |
| ZNF318       | -0.0175      | -0.077233333 | 0.144033333  | -0.1037      |
| SOD1         | 0.086466667  | 0.072066667  | 0.034166667  | -0.176333333 |
| ESCO2        | 0.154566667  | 0.377766667  | 0.276166667  | 0.096366667  |
| TEF          | 0.157166667  | -0.134433333 | -0.087866667 | -0.081833333 |
| SSH3         | -0.022933333 | 0.028733333  | -0.040833333 | -0.217766667 |
| KIAA0664     | 0.2625       | 0.218566667  | 0.194966667  | -0.030333333 |
| TMEM183B     | -0.007566667 | -0.013666667 | 0.1108       | -0.1829      |
| MTMR2        | -0.040633333 | 0.0315       | 0.1071       | -0.071866667 |
| LOC728105    | -0.055166667 | 0.1751       | 0.0416       | -0.239966667 |
| GDF11        | -0.113666667 | -0.023533333 | 0.353866667  | -0.153133333 |
| CCDC101      | 0.0239       | -0.014233333 | 0.006166667  | -0.118366667 |
| TRAPPC5      | -0.0052      | -0.000366667 | 0.128233333  | -0.1714      |
| BAT2D1       | 0.261766667  | 0.1685       | 0.049666667  | -0.120266667 |
| ZNF286C      | 0.169966667  | 0.0095       | 0.011466667  | -0.058166667 |
| C11orf67     | 0.1317       | 0.096066667  | -0.012433333 | -0.1265      |
| LCMT1        | 0.0477       | -0.010533333 | -0.051666667 | -0.164833333 |
| ZNF571       | -0.072266667 | 0.189066667  | 0.034166667  | -0.063833333 |
| FLJ45337     | 0.042166667  | 0.326        | 0.134666667  | -0.1609      |
| LOC653438    | 0.096633333  | 0.089533333  | 0.152866667  | 0.000533333  |
| GPATCH1      | 0.138866667  | 0.106733333  | 0.102333333  | -0.0525      |
| C1QBP        | 0.1899       | 0.3277       | 0.182333333  | 0.1144       |
| ZXDC         | 0.143733333  | 0.026633333  | 0.028433333  | -0.1197      |
| STIL         | 0.205733333  | 0.2362       | 0.110733333  | -0.049133333 |
| ARSB         | -0.058933333 | 0.018533333  | 0.217233333  | -0.084866667 |
| FNBP4        | 0.147233333  | 0.072833333  | -0.0166      | -0.096666667 |
| ATE1         | 0.3847       | 0.095266667  | 0.147666667  | 0.215266667  |
| TSPAN6       | -0.022833333 | -0.1548      | 0.128933333  | -0.222733333 |
| SCAMP2       | 0.1118       | 0.105666667  | 0.0683       | -0.0555      |
| TTC39C       | 0.1814       | 0.120466667  | 0.060233333  | -0.082033333 |
| MAPK12       | 0.076433333  | 0.203933333  | 0.068933333  | -0.068666667 |
| SRRM2        | 0.051766667  | 0.150533333  | 0.1739       | -0.103533333 |
| MCM10        | 0.276333333  | 0.517833333  | 0.285433333  | 0.098666667  |

|              |              |              |              |              |
|--------------|--------------|--------------|--------------|--------------|
| METTL5       | 0.117833333  | 0.147566667  | 0.070966667  | -0.082133333 |
| DHPS         | 0.047333333  | 0.055766667  | 0.182066667  | -0.137933333 |
| IPO13        | -0.052033333 | 0.121833333  | 0.009766667  | -0.239       |
| FAM127B      | -0.063033333 | -0.095433333 | 0.056466667  | -0.221533333 |
| RALY         | 0.169533333  | 0.1682       | 0.242233333  | -0.034233333 |
| RAD54B       | 0.245733333  | 0.145866667  | 0.006733333  | -0.034566667 |
| NXT2         | 0.028433333  | 0.095933333  | 0.218366667  | -0.0281      |
| BAG5         | 0.163966667  | 0.242466667  | 0.182766667  | 0.008333333  |
| UCHL5        | 0.2487       | 0.272566667  | 0.284333333  | 0.107        |
| C21orf33     | -0.2746      | 0.015666667  | 0.076866667  | -0.274366667 |
| TH1L         | -0.0409      | 0.188533333  | 0.2354       | -0.069       |
| CDCA5        | 0.319866667  | 0.1829       | 0.126        | 0.076433333  |
| MED30        | 0.362833333  | 0.327466667  | 0.167366667  | 0.1107       |
| XRCC3        | 0.0441       | 0.347        | 0.220733333  | 0.082733333  |
| NDUFB2       | 0.0675       | 0.155666667  | 0.0576       | -0.067033333 |
| MYO3B        | 0.116233333  | 0.473366667  | 0.342966667  | 0.085633333  |
| USP46        | 0.1118       | 0.1417       | 0.0282       | -0.198233333 |
| RBM4B        | -0.042133333 | -0.0386      | -0.030933333 | -0.2388      |
| NDUFS2       | 0.012733333  | 0.073        | 0.154233333  | -0.074866667 |
| DAZAP2       | -0.0318      | -0.049266667 | 0.175066667  | -0.097433333 |
| GCHFR        | 0.0663       | 0.112166667  | 0.040533333  | -0.0228      |
| LOC339843    | 0.132133333  | 0.141466667  | 0.072433333  | -0.141166667 |
| LOC650826    | -0.014366667 | -0.0061      | 0.039033333  | -0.109366667 |
| NUDC         | 0.2655       | 0.3044       | 0.085133333  | 0.0874       |
| MUL1         | 0.0331       | 0.0872       | 0.105033333  | -0.0017      |
| SNORD83B     | 0.295533333  | 0.1426       | 0.112866667  | -0.0395      |
| LOC729789    | 0.0621       | 0.132833333  | 0.1031       | -0.075       |
| LOC399942    | 0.603566667  | 0.069633333  | 0.2118       | -0.008833333 |
| DUSP16       | -0.0403      | 0.115266667  | 0.186666667  | -0.113466667 |
| EIF2C3       | 0.073366667  | -0.0214      | 0.012633333  | -0.099233333 |
| ECHDC1       | 0.078366667  | 0.060666667  | 0.054766667  | -0.005266667 |
| LOC648366    | 0.137466667  | 0.312233333  | 0.0117       | -0.1039      |
| GMFB         | 0.111433333  | -0.0965      | 0.102166667  | -0.137333333 |
| LOC646347    | 0.3281       | 0.339033333  | 0.0857       | 0.0352       |
| ZNF260       | 0.065233333  | 0.0521       | -0.123033333 | -0.195233333 |
| CENTB2       | -0.177633333 | -0.057233333 | -0.0133      | -0.194466667 |
| SSX1         | 0.0015       | 0.229533333  | 0.1584       | -0.0476      |
| LOC100133840 | -0.0114      | 0.031066667  | 0.286833333  | -0.2126      |
| MEPCE        | 0.2137       | 0.008333333  | 0.1031       | -0.028766667 |
| PAQR3        | 0.2528       | 0.229166667  | 0.2381       | 0.0948       |
| MAP4K3       | 0.174766667  | -0.0781      | 0.1391       | -0.079766667 |
| PIK3R4       | 0.050866667  | 0.0463       | 0.207566667  | 0.0428       |
| RABIF        | 0.056333333  | 0.110466667  | 0.0444       | -0.127366667 |
| ETNK2        | -0.047833333 | 0.098433333  | -0.017766667 | -0.188466667 |
| LOC339290    | 0.2806       | 0.015833333  | -0.056633333 | -0.0684      |
| ATP11B       | -0.121533333 | 0.085266667  | 0.177866667  | -0.163566667 |
| MEN1         | 0.056066667  | 0.262433333  | 0.099633333  | -0.1702      |

|           |              |              |              |              |
|-----------|--------------|--------------|--------------|--------------|
| LOC731777 | -0.025533333 | -0.091333333 | 0.0521       | -0.2913      |
| MST1      | -0.3829      | -0.328166667 | -0.027333333 | -0.6044      |
| DLST      | 0.253733333  | 0.034733333  | 0.1848       | -0.0926      |
| SSR4      | -0.0516      | -0.009233333 | 0.171733333  | -0.1202      |
| TSC2      | 0.0687       | -0.0236      | -0.047433333 | -0.277166667 |
| NDUFA4    | 0.110133333  | 0.032433333  | 0.0908       | -0.086533333 |
| INTS2     | 0.024266667  | 0.2022       | 0.2288       | 0.025366667  |
| TMEM149   | 0.019333333  | 0.097633333  | 0.113        | -0.1473      |
| PSME4     | 0.238266667  | 0.2576       | 0.144533333  | 0.088933333  |
| LOC728532 | 0.0694       | 0.134933333  | 0.033866667  | -0.093066667 |
| MTAP      | 0.199366667  | 0.221166667  | 0.318866667  | 0.0724       |
| SNRPG     | 0.217233333  | 0.298533333  | 0.1718       | 0.043366667  |
| TBCCD1    | 0.109066667  | 0.158666667  | 0.0591       | -0.069       |
| SCOC      | 0.094033333  | 0.122833333  | 0.159333333  | -0.0813      |
| INTS8     | 0.0631       | 0.190466667  | 0.0014       | -0.114466667 |
| SIVA1     | 0.343366667  | 0.097233333  | 0.166166667  | 0.073033333  |
| FAM54B    | -0.059833333 | 0.124966667  | 0.2969       | 0.053066667  |
| LOC390345 | 0.0649       | -0.021566667 | -0.099366667 | -0.197666667 |
| C14orf124 | -0.013233333 | -0.0733      | 0.2881       | -0.215533333 |
| ATG16L1   | 0.1672       | 0.116666667  | 0.057533333  | -0.066766667 |
| FCGR2B    | -0.008333333 | 0.012666667  | 0.336633333  | -0.0328      |
| BRD1      | 0.162466667  | 0.2069       | 0.0075       | 0.050033333  |
| CC2D1A    | -0.0571      | 0.136333333  | 0.208066667  | -0.072566667 |
| LOC643918 | 0.170133333  | 0.2455       | 0.160566667  | -0.005966667 |
| LOC728931 | 0.393266667  | 0.4829       | 0.458133333  | 0.3128       |
| GNG12     | 0.354866667  | 0.2545       | 0.478533333  | 0.0871       |
| SLC36A1   | 0.315333333  | 0.078033333  | 0.2682       | 0.086533333  |
| MKNK1     | 0.114166667  | 0.162933333  | 0.134033333  | 0.0508       |
| SNORD89   | 0.106766667  | -0.057266667 | 0.0864       | -0.127533333 |
| C1orf216  | 0.1619       | -0.045033333 | -0.215       | -0.122733333 |
| PPP3R1    | 0.278966667  | 0.2923       | 0.099133333  | -0.059166667 |
| RTN3      | -0.090166667 | 0.0071       | -0.2176      | -0.263733333 |
| PCBP4     | 0.027566667  | 0.206966667  | 0.1488       | -0.1485      |
| MASTL     | 0.1736       | 0.322533333  | 0.2016       | 0.0508       |
| PPM1A     | 0.186266667  | -0.012533333 | 0.084566667  | -0.0732      |
| CHMP6     | -0.005033333 | 0.069866667  | 0.163533333  | -0.150166667 |
| CENPP     | 0.224933333  | 0.031166667  | 0.1824       | -0.059966667 |
| 1-Sep     | 0.269766667  | 0.170533333  | 0.104066667  | -0.036466667 |
| KCTD13    | 0.282266667  | 0.092833333  | 0.054233333  | -0.002333333 |
| LOC649143 | 0.009633333  | 0.062633333  | 0.142266667  | -0.125466667 |
| SLC25A6   | -0.2839      | -0.0285      | 0.117266667  | -0.2355      |
| ZNF679    | 0.064833333  | 0.068066667  | 0.177766667  | -0.126733333 |
| HDAC1     | 0.221033333  | 0.1739       | 0.215166667  | 0.039066667  |
| FAM10A4   | -0.0041      | -0.0117      | 0.003766667  | -0.170233333 |
| DYNLL1    | 0.275966667  | 0.286233333  | 0.0567       | -0.0202      |
| YIF1A     | -0.002266667 | 0.0203       | -0.2624      | -0.3048      |
| MDM2      | 0.2439       | 0.1682       | 0.2347       | -0.0383      |

|              |              |              |              |              |
|--------------|--------------|--------------|--------------|--------------|
| RANBP1       | 0.3476       | 0.1149       | 0.2311       | 0.0389       |
| APEX2        | 0.300633333  | 0.340233333  | 0.2558       | 0.2412       |
| LOC100129267 | 0.3835       | 0.320633333  | 0.3157       | 0.078366667  |
| TECPR1       | -0.112866667 | 0.0385       | 0.141133333  | -0.2235      |
| PTPMT1       | 0.072266667  | 0.1943       | 0.1531       | -0.122766667 |
| MVK          | 0.043633333  | 0.123833333  | 0.279166667  | 0.142666667  |
| LOC100132457 | 0.246233333  | 0.246166667  | 0.233        | 0.110066667  |
| UXS1         | 0.2255       | 0.087266667  | 0.178233333  | -0.0398      |
| STRAP        | 0.1952       | 0.190833333  | 0.099066667  | -0.037833333 |
| C14orf156    | 0.257933333  | 0.178266667  | 0.130733333  | 0.0178       |
| SCFD1        | 0.0434       | 0.078833333  | -0.150966667 | -0.245566667 |
| KLHL15       | 0.076366667  | 0.2043       | 0.358266667  | 0.024033333  |
| ARHGAP19     | 0.437733333  | 0.239466667  | 0.125033333  | 0.183466667  |
| ZMYM1        | 0.367333333  | 0.258633333  | 0.125966667  | 0.059166667  |
| CLNS1A       | 0.012833333  | 0.204766667  | 0.158666667  | -0.1213      |
| HAUS6        | 0.1313       | 0.2559       | 0.090566667  | -0.039766667 |
| MCRS1        | 0.146133333  | 0.1032       | 0.1175       | -0.046866667 |
| FH           | 0.243766667  | 0.319233333  | 0.100133333  | 0.030366667  |
| MLYCD        | -0.020466667 | -0.065766667 | 0.182566667  | -0.217366667 |
| WDR13        | -0.159833333 | -0.1156      | -0.117933333 | -0.245533333 |
| EXOSC5       | -0.060266667 | 0.068366667  | 0.155933333  | -0.129366667 |
| UBL7         | -0.170466667 | 0.086666667  | 0.2097       | -0.056833333 |
| PON2         | -0.094066667 | -0.0452      | 0.0254       | -0.1974      |
| PNKP         | 0.116366667  | 0.0256       | 0.206466667  | -0.124033333 |
| CAP2         | 0.004133333  | 0.121733333  | 0.126433333  | -0.1469      |
| ATP6VOA4     | 0.358333333  | 0.188133333  | -0.078433333 | -0.023366667 |
| EIF2AK2      | 0.125233333  | 0.209866667  | 0.043666667  | -0.161       |
| PDCD2L       | 0.168566667  | 0.383433333  | 0.266        | 0.024933333  |
| MAP3K7IP1    | 0.0025       | -0.017933333 | 0.019        | -0.1921      |
| OGT          | -0.037666667 | -0.087966667 | 0.058766667  | -0.292       |
| RALGPS2      | 0.3186       | 0.252366667  | -0.062133333 | 0.023366667  |
| FMN2         | 0.479        | 0.025833333  | -0.0534      | -0.03        |
| FAM92A1      | 0.149133333  | 0.047933333  | 0.052066667  | -0.034033333 |
| CTPS2        | -0.042733333 | 0.080566667  | 0.1727       | -0.168833333 |
| HTRA2        | 0.131433333  | 0.150033333  | 0.1236       | -0.1045      |
| C14orf102    | -0.000266667 | 0.0367       | 0.229266667  | -0.2693      |
| SERF1A       | 0.178933333  | 0.079733333  | 0.121966667  | -0.0337      |
| UBASH3B      | 0.731366667  | 0.653566667  | -0.042233333 | 0.118766667  |
| C1orf166     | 0.039        | 0.1852       | 0.0872       | -0.0766      |
| CASP9        | -0.123966667 | 0.002733333  | 0.1669       | -0.224133333 |
| GTF3C3       | 0.113233333  | 0.145566667  | 0.0121       | -0.1392      |
| MSH6         | 0.051066667  | 0.379133333  | 0.452166667  | -0.004633333 |
| ATP5EP2      | 0.1535       | 0.1651       | 0.199066667  | -0.0495      |
| TMEM185A     | 0.116533333  | 0.099833333  | -0.011566667 | -0.050166667 |
| ZNF644       | -0.005       | -0.077133333 | -0.020233333 | -0.239966667 |
| ZNF227       | -0.066966667 | 0.071833333  | 0.071433333  | -0.081766667 |
| KIF13B       | 0.0405       | 0.1539       | -0.0155      | -0.1141      |

|              |              |              |              |              |
|--------------|--------------|--------------|--------------|--------------|
| KIAA0247     | 0.190133333  | 0.013766667  | 0.0792       | -0.054833333 |
| ZMYND12      | -0.2791      | 0.049866667  | -0.051766667 | -0.3281      |
| HOXB4        | 0.376433333  | 0.154733333  | 0.207666667  | 0.0434       |
| PFKL         | 0.0426       | 0.032666667  | 0.028566667  | -0.228366667 |
| ERCC3        | 0.337066667  | 0.235033333  | 0.126033333  | 0.105066667  |
| ELAVL1       | 0.2364       | 0.1676       | 0.2363       | -0.1162      |
| COPE         | 0.096733333  | 0.055866667  | 0.1138       | -0.0882      |
| ZNF823       | 0.0917       | 0.0059       | 0.1566       | -0.049566667 |
| RBED1        | -0.199933333 | 0.171366667  | 0.138833333  | -0.226       |
| NDUFS7       | -0.149633333 | 0.0233       | 0.120233333  | -0.2548      |
| SEH1L        | 0.449033333  | 0.3949       | 0.217133333  | 0.175233333  |
| RPGR         | 0.457933333  | 0.1682       | 0.249333333  | 0.264866667  |
| C20orf30     | -0.195766667 | 0.139366667  | -0.044966667 | -0.1629      |
| IFIH1        | -0.142766667 | -0.128       | 0.006366667  | -0.270533333 |
| MST4         | 0.426466667  | 0.254833333  | 0.305833333  | 0.1621       |
| ECT2         | 0.336266667  | 0.228633333  | 0.142733333  | 0.049766667  |
| VPS4B        | 0.174533333  | -0.071266667 | 0.0418       | -0.151       |
| FAM3A        | 0.021566667  | -0.044666667 | -0.0776      | -0.172166667 |
| NOMO1        | 0.054866667  | -0.071633333 | 0.127933333  | -0.172266667 |
| RHOT2        | 0.1997       | 0.096666667  | 0.123266667  | -0.092466667 |
| SSSCA1       | 0.283466667  | 0.101666667  | 0.176033333  | -0.038633333 |
| DAK          | 0.031733333  | 0.1018       | -0.0091      | -0.169833333 |
| LOC100133008 | -0.124033333 | 0.227533333  | 0.169233333  | -0.2025      |
| LOC441714    | 0.199433333  | -0.0151      | 0.1298       | -0.090666667 |
| EIF4A3       | 0.163766667  | 0.239866667  | 0.1841       | 0.034366667  |
| TMEM199      | 0.346833333  | 0.106833333  | 0.174333333  | 0.120433333  |
| TUBA1A       | 0.462566667  | 0.202866667  | 0.307833333  | -0.035533333 |
| LOC284393    | 0.029333333  | 0.0703       | 0.0051       | -0.257266667 |
| LOC645737    | -0.3552      | 0.311833333  | -0.3861      | -0.529266667 |
| FAHD2A       | -0.1451      | 0.0296       | 0.253533333  | -0.1966      |
| ERP29        | -0.063366667 | -0.235533333 | -0.002966667 | -0.284233333 |
| OPA3         | 0.1825       | 0.197333333  | 0.129033333  | -0.040633333 |
| TUBD1        | 0.178733333  | -0.045233333 | 0.1745       | -0.0256      |
| LOC100133055 | 0.297533333  | 0.0049       | -0.122933333 | -0.1281      |
| TOMM20       | 0.091766667  | -0.102733333 | -0.002133333 | -0.2429      |
| PLEKHJ1      | 0.149566667  | 0.240533333  | -0.055066667 | -0.0712      |
| LOC728888    | -0.035633333 | -0.027333333 | -0.042533333 | -0.227733333 |
| SNORA18      | 0.025        | 0.150366667  | 0.2602       | -0.0815      |
| UBFD1        | 0.082233333  | 0.1702       | 0.176166667  | -0.025       |
| RPS4X        | 0.010166667  | 0.065533333  | 0.066        | -0.155033333 |
| SNTA1        | 0.0901       | 0.051        | -0.002866667 | -0.170133333 |
| PUM2         | 0.236066667  | -0.0253      | 0.062933333  | -0.083433333 |
| FAM63A       | -0.0285      | 0.3233       | 0.285266667  | -0.157       |
| VAMP3        | 0.109366667  | 0.157166667  | -0.070866667 | -0.175866667 |
| ERLIN2       | -0.060066667 | -0.1077      | 0.1392       | -0.1496      |
| BTBD15       | 0.0862       | -0.028666667 | 0.051233333  | -0.248933333 |
| CREBBP       | 0.260333333  | 0.068366667  | 0.003333333  | 0.0061       |

|           |              |              |              |              |
|-----------|--------------|--------------|--------------|--------------|
| MARK2     | 0.154466667  | 0.232966667  | 0.1201       | -0.017533333 |
| ARHGEF10  | 0.129133333  | 0.3366       | -0.0255      | -0.0673      |
| SMCR7L    | 0.1471       | 0.123533333  | 0.0657       | -0.089       |
| PAXIP1    | 0.1472       | 0.156633333  | 0.2529       | -0.0427      |
| SIRT5     | -0.2725      | 0.081666667  | 0.005066667  | -0.2711      |
| ATPBD3    | 0.0959       | 0.184233333  | 0.334266667  | 0.031633333  |
| RAB33B    | 0.041033333  | 0.0793       | -0.1832      | -0.314033333 |
| SOCS4     | 0.023466667  | 0.072633333  | 0.355166667  | 0.008566667  |
| SNRPD2    | 0.087533333  | 0.069333333  | 0.093433333  | -0.1575      |
| ZNF692    | 0.048733333  | 0.175366667  | 0.047333333  | -0.125233333 |
| SMU1      | 0.248133333  | 0.017433333  | 0.092533333  | -0.088433333 |
| HNRPC     | 0.133333333  | 0.271        | 0.163966667  | -0.059933333 |
| ZNF695    | 0.154533333  | 0.1831       | 0.2073       | -0.0569      |
| ZNRF3     | 0.273        | 0.263233333  | 0.0851       | 0.056033333  |
| BTN3A1    | -0.205233333 | 0.0432       | 0.096433333  | -0.295566667 |
| ACTA2     | -0.138166667 | 0.071566667  | 0.1547       | -0.345366667 |
| CD302     | -0.040566667 | 0.112366667  | 0.0588       | -0.244533333 |
| LOC344328 | 0.039033333  | 0.113533333  | 0.129033333  | -0.123366667 |
| LOC645099 | 0.321233333  | 0.086633333  | 0.1625       | -0.0487      |
| ZC3H3     | 0.241966667  | 0.080966667  | 0.006766667  | 0.003133333  |
| CDYL      | 0.091233333  | 0.193566667  | 0.244133333  | -0.055933333 |
| MTF2      | 0.311933333  | 0.468666667  | 0.396733333  | 0.2055       |
| MUM1      | -0.073933333 | -0.005566667 | -0.2074      | -0.351566667 |
| DCI       | -0.0598      | -0.060233333 | 0.259766667  | -0.104066667 |
| THOC7     | 0.270666667  | 0.299766667  | 0.0027       | 0.120433333  |
| ATP2A2    | 0.418        | 0.191866667  | 0.283233333  | 0.022633333  |
| DHX36     | 0.225566667  | 0.149433333  | 0.129566667  | -0.0525      |
| BECN1     | 0.142766667  | 0.171        | 0.181333333  | -0.044966667 |
| PDGFD     | -0.046866667 | 0.079666667  | 0.424933333  | -0.098633333 |
| GCNT2     | -0.128633333 | 0.0693       | 0.1881       | -0.1489      |
| PCMTD2    | -0.1199      | -0.182433333 | 0.084466667  | -0.372233333 |
| ZFYVE21   | -0.0071      | 0.076        | 0.0943       | -0.148       |
| C14orf2   | 0.216166667  | 0.1046       | -0.039066667 | -0.0198      |
| FADD      | 0.158466667  | 0.0536       | 0.1574       | -0.056066667 |
| ZNF777    | 0.0821       | 0.005266667  | 0.0027       | -0.166033333 |
| MOCS1     | 0.2099       | -0.0122      | 0.2337       | 0.087466667  |
| HMGCS1    | -0.061266667 | 0.057966667  | 1.020566667  | 0.5823       |
| UQCRHL    | 0.083066667  | 0.177933333  | 0.092666667  | -0.1679      |
| KLF6      | 0.585533333  | 0.100466667  | 0.002433333  | 0.189266667  |
| DDX1      | 0.2118       | 0.213966667  | 0.043066667  | -0.013766667 |
| PACSIN3   | 0.104733333  | 0.0951       | 0.238        | -0.025533333 |
| MAP3K3    | 0.091233333  | 0.0285       | 0.061966667  | 0.069866667  |
| ITGA4     | 0.234966667  | 0.2787       | 0.098866667  | -0.052866667 |
| CBX4      | -0.063733333 | -0.199633333 | -0.104766667 | -0.290166667 |
| C14orf135 | 0.2969       | 0.112066667  | 0.1378       | 0.247433333  |
| TOMM22    | 0.1447       | 0.1622       | 0.171566667  | -0.0363      |
| FAM59A    | -0.0888      | -0.003633333 | 0.0803       | -0.214133333 |



|              |              |              |              |              |
|--------------|--------------|--------------|--------------|--------------|
| C15orf24     | -0.021233333 | 0.010366667  | 0.054133333  | -0.132833333 |
| TCEB1        | 0.381666667  | 0.112233333  | 0.292166667  | 0.139566667  |
| CYB5R3       | 0.0819       | 0.098866667  | -0.034566667 | -0.201366667 |
| ZBTB3        | 0.0452       | -0.069733333 | 0.009566667  | -0.146       |
| C6orf115     | 0.003766667  | 0.126533333  | 0.3843       | 0.119866667  |
| TIMM10       | 0.4209       | 0.2855       | 0.188333333  | 0.111933333  |
| QTRT1        | 0.0314       | 0.1628       | -0.0252      | -0.215966667 |
| AYP1p1       | 0.112        | 0.079633333  | 0.2231       | -0.1705      |
| UBN1         | 0.071166667  | 0.142233333  | 0.0917       | -0.1113      |
| TSN          | -0.082966667 | 0.021866667  | 0.034166667  | -0.189       |
| LOC220686    | 0.094066667  | 0.0711       | 0.119066667  | -0.146966667 |
| LDHB         | 0.1702       | 0.124366667  | 0.2038       | -0.0602      |
| SP2          | 0.163533333  | -0.000533333 | 0.049333333  | -0.0468      |
| SMAD2        | 0.084233333  | 0.165366667  | 0.174333333  | -0.153733333 |
| LOC100133649 | 0.094033333  | 0.242466667  | 0.192966667  | -0.1684      |
| LOC402175    | 0.127533333  | 0.028233333  | 0.242533333  | -0.029       |
| EIF5B        | 0.262566667  | 0.234266667  | 0.270166667  | 0.031433333  |
| LOC728556    | 0.2215       | 0.245366667  | 0.193466667  | -0.016733333 |
| UBE2T        | 0.2546       | 0.398433333  | 0.161333333  | -0.0224      |
| MBTPS2       | -0.0073      | 0.1532       | 0.134766667  | -0.263266667 |
| DZIP1L       | 0.182733333  | 0.163        | 0.105766667  | -0.037833333 |
| TOMM40L      | 0.155166667  | 0.231733333  | 0.513466667  | 0.130966667  |
| LOC654074    | 0.026066667  | 0.278        | -0.021666667 | -0.2622      |
| GK5          | 0.070866667  | 0.206866667  | 0.218966667  | -0.086033333 |
| GATAD2B      | 0.261766667  | 0.116933333  | -0.046966667 | -0.1665      |
| TNPO2        | 0.234266667  | 0.2274       | 0.2692       | 0.073333333  |
| VPS11        | 0.095966667  | 0.047766667  | 0.1407       | -0.089733333 |
| COQ6         | 0.172433333  | 0.114566667  | 0.280566667  | -0.115833333 |
| PITPNC1      | 0.1394       | 0.102433333  | 0.2195       | -0.0922      |
| C14orf167    | -0.045666667 | -0.134733333 | -0.1637      | -0.310833333 |
| FAM62B       | -0.015033333 | -0.073966667 | 0.023566667  | -0.280233333 |
| HSPCAL3      | -0.034733333 | 0.8485       | 0.007033333  | -0.1926      |
| SMS          | 0.364233333  | 0.3594       | 0.065166667  | -0.000366667 |
| LOC388789    | -0.010733333 | 0.076966667  | -0.029433333 | -0.2517      |
| LOC100134239 | 0.055266667  | 0.1849       | 0.067033333  | -0.194633333 |
| NDUFA11      | 0.1061       | 0.0978       | 0.146566667  | 0.041033333  |
| PRR11        | 0.358366667  | 0.244033333  | 0.0154       | -0.1355      |
| POLE         | 0.368433333  | 0.228466667  | 0.0697       | 0.027766667  |
| UGCGL1       | -0.029266667 | 0.121033333  | 0.049266667  | -0.305866667 |
| MTRR         | 0.3206       | 0.135433333  | 0.276033333  | -0.0348      |
| RPS6KA4      | 0.310033333  | 0.286466667  | -0.0442      | 0.034566667  |
| IGBP1        | -0.093633333 | -0.045366667 | 0.0603       | -0.2658      |
| BAGE5        | 0.070366667  | 0.1964       | 0.118066667  | -0.198866667 |
| RPTOR        | 0.016333333  | 0.1226       | 0.09         | -0.0548      |
| LOC645381    | 0.284366667  | 0.094966667  | -0.061533333 | -0.057266667 |
| ADO          | 0.201766667  | 0.193        | 0.1811       | -0.0251      |
| LOC731605    | 0.1477       | 0.227766667  | 0.0509       | -0.1138      |

|           |              |              |              |              |
|-----------|--------------|--------------|--------------|--------------|
| KIAA1468  | 0.118366667  | 0.055766667  | 0.0741       | -0.0674      |
| SUZ12P    | -0.0193      | 0.216933333  | 0.334733333  | -0.274733333 |
| SLC25A40  | 0.185033333  | 0.1985       | 0.354566667  | 0.065866667  |
| CDC42BPB  | 0.120933333  | 0.152933333  | 0.000533333  | -0.2034      |
| SHPRH     | 0.054366667  | 0.143066667  | 0.1502       | -0.126566667 |
| EEF2      | -0.029066667 | -0.147       | 0.080666667  | -0.241733333 |
| INPP5F    | 0.1708       | -0.0029      | 0.2931       | -0.110833333 |
| RHOBTB2   | 0.151866667  | 0.092833333  | 0.1972       | -0.0205      |
| UQCRH     | -0.006966667 | 0.125966667  | -0.0976      | -0.306066667 |
| DNAJA3    | 0.1169       | 0.232333333  | 0.1442       | -0.026133333 |
| ACAT2     | 0.1777       | 0.087733333  | 0.466033333  | 0.158566667  |
| SHKBP1    | 0.1564       | 0.0967       | -0.033766667 | -0.1572      |
| SERF1B    | 0.198166667  | 0.0646       | 0.271966667  | -0.094066667 |
| RNU105A   | 0.318933333  | 0.2643       | 0.5138       | 0.0696       |
| BIN3      | 0.245066667  | 0.3407       | 0.253266667  | 0.056933333  |
| C19orf44  | 0.081733333  | 0.074466667  | 0.0815       | -0.091466667 |
| INTS4     | 0.023266667  | -0.0175      | 0.028        | -0.1957      |
| C14orf126 | 0.223533333  | 0.140166667  | 0.074833333  | -0.038966667 |
| PRMT3     | 0.311866667  | 0.104833333  | 0.2281       | 0.070866667  |
| CSDA      | 0.092066667  | 0.146633333  | 0.2405       | -0.104533333 |
| SLC39A14  | 0.2086       | 0.117833333  | 0.0775       | -0.133433333 |
| ACTR10    | 0.021633333  | 0.046333333  | -0.140033333 | -0.1897      |
| TRMT2A    | -0.0121      | 0.030966667  | 0.1689       | -0.214533333 |
| C20orf27  | 0.152066667  | 0.2452       | 0.1703       | -0.034533333 |
| GNL3L     | 0.2512       | 0.340666667  | 0.123        | 0.062566667  |
| CBL       | 0.318        | 0.2436       | 0.280866667  | 0.030633333  |
| LOC727803 | 0.460466667  | 0.210366667  | 0.181366667  | 0.109033333  |
| C22orf39  | 0.063533333  | 0.0211       | 0.109766667  | -0.221533333 |
| USP34     | 0.013466667  | 0.0207       | 0.0334       | -0.279       |
| C11orf60  | 0.0223       | 0.045266667  | 0.090266667  | -0.082766667 |
| GUF1      | 0.174        | 0.190666667  | 0.1632       | -0.072466667 |
| DOCK10    | -0.3501      | -0.0543      | 0.416866667  | -0.195833333 |
| ABHD2     | 0.348166667  | 0.3184       | 0.258466667  | 0.219866667  |
| USP1      | 0.187733333  | 0.308866667  | 0.132666667  | -0.119566667 |
| RPL8      | 0.170733333  | 0.204233333  | 0.298733333  | 0.103633333  |
| C6orf162  | 0.143        | 0.226233333  | 0.118866667  | -0.082366667 |
| DKC1      | 0.366866667  | 0.329933333  | 0.160433333  | 0.0808       |
| AARS      | -0.2584      | -0.1791      | 0.001466667  | -0.4037      |
| C9orf82   | 0.0088       | 0.096166667  | 0.164733333  | -0.167633333 |
| IMP4      | 0.312233333  | 0.351933333  | 0.071866667  | 0.051766667  |
| LOC653557 | 0.282466667  | 0.119266667  | 0.116333333  | -0.0285      |
| C19orf40  | 0.233166667  | 0.1307       | 0.188266667  | -0.143166667 |
| VPS16     | -0.022133333 | -0.030166667 | 0.258033333  | -0.196366667 |
| UBE2G2    | 0.3074       | 0.108166667  | 0.199566667  | -0.052966667 |
| POLR3C    | 0.166133333  | 0.077333333  | -0.021933333 | -0.102766667 |
| GANAB     | -0.034933333 | -0.134466667 | 0.0878       | -0.2795      |
| LOC728843 | -0.2106      | 0.184466667  | -0.257766667 | -0.470133333 |

|           |              |              |              |              |
|-----------|--------------|--------------|--------------|--------------|
| LOC644591 | 0.051266667  | 0.1086       | 0.2338       | -0.1948      |
| ANKRD16   | 0.193        | 0.117733333  | 0.303766667  | -0.0042      |
| C1orf198  | -0.0211      | 0.062133333  | -0.027266667 | -0.13        |
| UBA1      | 0.170933333  | 0.158766667  | 0.140633333  | -0.036166667 |
| LOC729887 | -0.1275      | 0.0433       | 0.137466667  | -0.2444      |
| SLC2A8    | 0.149866667  | 0.030733333  | 0.030066667  | -0.207666667 |
| TUBGCP6   | -0.023966667 | -0.0015      | 0.090366667  | -0.209433333 |
| WWP1      | 0.169566667  | -0.023       | 0.113333333  | -0.168066667 |
| APEH      | -0.0944      | 0.0518       | 0.248233333  | -0.203966667 |
| EIF3G     | 0.0151       | 0.1105       | 0.0378       | -0.117033333 |
| HIGD2A    | -0.065       | 0.099566667  | 0.145133333  | -0.2147      |
| BVES      | 0.1746       | 0.221133333  | -0.1029      | -0.1398      |
| NOL12     | 0.125766667  | 0.174933333  | 0.085066667  | -0.0582      |
| MED12     | -0.021433333 | -0.018533333 | 0.067866667  | -0.349266667 |
| RPA1      | 0.2055       | 0.255933333  | 0.1194       | -0.067266667 |
| CREB1     | 0.179        | 0.398433333  | 0.495033333  | 0.0291       |
| ARFGEF2   | 0.1812       | 0.028133333  | 0.101066667  | 0.031        |
| AGPAT1    | 0.0047       | 0.161066667  | 0.193833333  | -0.2052      |
| EBP       | 0.111933333  | 0.090133333  | 0.394933333  | -0.039366667 |
| CAMKK2    | -0.058466667 | 0.035133333  | 0.084466667  | -0.142166667 |
| LOC440366 | -0.032866667 | 0.147366667  | 0.224466667  | -0.122       |
| TPR       | 0.107        | 0.0454       | 0.1008       | -0.2745      |
| UBE2O     | 0.0566       | 0.077133333  | 0.177366667  | -0.269766667 |
| KIAA1430  | 0.0191       | 0.065766667  | 0.099366667  | -0.0841      |
| YY1       | 0.0798       | 0.1557       | -0.013033333 | -0.231533333 |
| DENND4C   | 0.068133333  | -0.091566667 | 0.061266667  | -0.270933333 |
| MIR1974   | 0.443933333  | 0.425733333  | 0.334466667  | -0.1654      |
| PNMA1     | 0.309        | -0.0436      | -0.219833333 | -0.195966667 |
| FAM86C    | 0.1946       | 0.2016       | 0.209766667  | 0.003166667  |
| ALX1      | -0.098366667 | -0.007033333 | 0.237166667  | -0.1402      |
| ERBB2     | 0.117433333  | 0.019766667  | -0.123133333 | -0.250566667 |
| ARL6IP6   | 0.393033333  | 0.165466667  | 0.3073       | -0.0157      |
| CHAC2     | 0.297133333  | 0.496333333  | 0.4187       | 0.089066667  |
| NISCH     | -0.046366667 | -0.0287      | 0.089066667  | -0.339366667 |
| DHRS11    | 0.1554       | 0.063233333  | 0.327633333  | -0.0573      |
| INO80D    | 0.171166667  | 0.084566667  | 0.1839       | -0.036733333 |
| NOLC1     | 0.442866667  | 0.324033333  | 0.324        | 0.005366667  |
| FUZ       | -0.096766667 | -0.0648      | 0.1109       | -0.2972      |
| VPS45     | 0.157233333  | 0.136333333  | 0.055833333  | -0.1072      |
| RNF34     | 0.3026       | 0.3684       | 0.164        | 0.1932       |
| GTDC1     | 0.022066667  | 0.139833333  | -0.061833333 | -0.1246      |
| LOC648695 | 0.188466667  | 0.077533333  | 0.247733333  | -0.153366667 |
| LOC730098 | -0.0102      | -0.025766667 | 0.0423       | -0.3251      |
| EPHX1     | -0.133466667 | -0.090733333 | -0.0372      | -0.184866667 |
| LIMA1     | 0.6155       | 0.198666667  | -0.076666667 | 0.034866667  |
| CLEC16A   | -0.021866667 | 0.091666667  | 0.0427       | -0.3215      |
| FBL       | 0.268533333  | 0.135866667  | 0.257433333  | 0.018433333  |

|              |              |              |              |              |
|--------------|--------------|--------------|--------------|--------------|
| ADA          | -0.091033333 | 0.101466667  | 0.005233333  | -0.2589      |
| EIF2B3       | 0.342633333  | 0.342366667  | 0.108866667  | -0.033233333 |
| ARPP-21      | 0.115766667  | 0.213766667  | 0.117633333  | -0.126333333 |
| MTHFR        | -0.2173      | -0.2174      | -0.0597      | -0.3776      |
| BAIAP2       | -0.144433333 | 0.100166667  | -0.021933333 | -0.172733333 |
| ZNF24        | 0.1554       | 0.195033333  | 0.1602       | -0.042733333 |
| SPRED2       | 0.3552       | 0.431533333  | 0.527366667  | 0.238066667  |
| SMAP2        | 0.265466667  | 0.389466667  | 0.445533333  | 0.132766667  |
| LOC392635    | 0.144633333  | 0.355066667  | 0.2231       | 0.0047       |
| SFRS7        | -0.026333333 | 0.4142       | 0.592633333  | -0.069233333 |
| SMPD4        | 0.180566667  | 0.290466667  | 0.1773       | -0.008166667 |
| LOC100132299 | 0.1143       | 0.209        | 0.2585       | -0.037533333 |
| NT5DC1       | -0.153766667 | 0.050333333  | -0.105966667 | -0.318966667 |
| DCTPP1       | 0.2762       | 0.359        | 0.278533333  | 0.1302       |
| LRWD1        | 0.366266667  | 0.345466667  | 0.143133333  | 0.0486       |
| TRIM47       | 0.186133333  | 0.001266667  | 0.317433333  | 0.150066667  |
| MDP1         | -0.145333333 | -0.069066667 | 0.025066667  | -0.2937      |
| DDX20        | 0.352733333  | 0.2158       | 0.055066667  | 0.0021       |
| SPC25        | 0.2399       | 0.2533       | 0.103733333  | 0.113333333  |
| NUP98        | 0.250466667  | 0.214933333  | 0.201833333  | 0.016233333  |
| FAM188A      | 0.053466667  | 0.102733333  | 0.173633333  | -0.182133333 |
| EEF1D        | 0.091        | 0.104333333  | -0.013966667 | -0.140366667 |
| TM2D1        | 0.038933333  | 0.008966667  | 0.065533333  | -0.262066667 |
| PITPNB       | 0.428066667  | 0.289766667  | 0.205733333  | 0.117466667  |
| ANKRD20A1    | -0.042066667 | 0.1386       | 0.066633333  | -0.281033333 |
| IL1RAPL1     | 0.271433333  | 0.316066667  | 0.148566667  | 0.040333333  |
| GRB14        | -0.064966667 | 0.2271       | 0.445366667  | -0.033133333 |
| TOMM5        | 0.4434       | 0.206566667  | 0.1507       | 0.073933333  |
| SNX2         | -0.072666667 | 0.035333333  | 0.114866667  | -0.131833333 |
| ZMYND8       | 0.056566667  | 0.076533333  | 0.311933333  | -0.2822      |
| CEP170       | 0.010333333  | 0.2497       | 0.248833333  | -0.145133333 |
| TIGD7        | 0.0186       | 0.070933333  | -0.051433333 | -0.1128      |
| MADD         | 0.197866667  | 0.087666667  | 0.259566667  | -0.046666667 |
| ABLIM1       | 0.091633333  | 0.108566667  | -0.047333333 | -0.214833333 |
| LOC100132724 | 0.038233333  | 0.353333333  | -0.051366667 | -0.102566667 |
| GOLM1        | 0.034066667  | 0.0191       | 0.134666667  | -0.2079      |
| ATP5G2       | 0.077433333  | -0.017       | 0.112433333  | -0.2368      |
| PQLC2        | 0.0003       | 0.093433333  | 0.028466667  | -0.114533333 |
| LOC648057    | 0.048066667  | -0.0048      | 0.192933333  | -0.2498      |
| POLR2G       | -0.0525      | 0.058133333  | 0.095366667  | -0.1257      |
| LOC643284    | 0.096666667  | 0.0968       | 0.1781       | -0.046266667 |
| NUCB1        | -0.033766667 | -0.133066667 | 0.079        | -0.307933333 |
| HMG3         | 0.0828       | 0.082066667  | 0.043766667  | -0.056066667 |
| HNRPLL       | -0.006433333 | 0.084133333  | 0.045033333  | -0.133266667 |
| COG2         | 0.150033333  | 0.0209       | -0.005533333 | -0.124033333 |
| MAOA         | 0.0023       | 0.164233333  | 0.1955       | -0.1097      |
| C17orf41     | 0.1029       | 0.2732       | 0.271566667  | -0.061766667 |

|              |              |              |              |              |
|--------------|--------------|--------------|--------------|--------------|
| PFAS         | 0.2341       | 0.3276       | 0.2468       | -0.0101      |
| FOXRED1      | 0.023033333  | 0.221566667  | 0.198733333  | -0.074633333 |
| TMEM87B      | 0.3508       | 0.365833333  | 0.209133333  | 0.061066667  |
| MUS81        | 0.264633333  | 0.066666667  | -0.097466667 | -0.125       |
| ALG1         | 0.246566667  | 0.1127       | 0.093233333  | -0.1171      |
| FLJ36070     | 0.028533333  | 0.264966667  | 0.1963       | -0.097733333 |
| NOMO2        | -0.0813      | 0.0217       | 0.040066667  | -0.269833333 |
| NR2F6        | 0.333766667  | 0.318333333  | 0.041733333  | 0.031533333  |
| CAND1        | 0.038333333  | -0.132866667 | 0.303666667  | -0.1776      |
| FAM76B       | 0.115333333  | -0.050433333 | 0.1488       | -0.139866667 |
| C20orf45     | 0.2872       | 0.289233333  | 0.261166667  | 0.1274       |
| RWDD4A       | 0.062366667  | 0.088933333  | 0.202566667  | -0.045766667 |
| METTL7B      | 0.2583       | 0.147233333  | 0.1943       | -0.078966667 |
| ZNF259       | 0.4253       | 0.2162       | 0.0896       | 0.0797       |
| AP1G2        | -0.005933333 | 0.060633333  | 0.066166667  | -0.146633333 |
| KIAA2010     | 0.430966667  | 0.156133333  | 0.173733333  | 0.0253       |
| MMADHC       | 0.245366667  | 0.315966667  | 0.136833333  | 0.009366667  |
| ARPC1B       | -0.045933333 | 0.019833333  | 0.0855       | -0.214366667 |
| EIF3H        | -0.023366667 | -0.008633333 | 0.083666667  | -0.275733333 |
| CCNB2        | 0.3434       | 0.192666667  | 0.096766667  | -0.1051      |
| NCOA6        | 0.1591       | 0.0356       | 0.0164       | -0.0774      |
| LHPP         | -0.072666667 | -0.038766667 | 0.0679       | -0.194833333 |
| RIMS2        | 0.0074       | -0.0269      | 0.525166667  | -0.0446      |
| PLCB4        | -0.053933333 | 0.128266667  | 0.351766667  | -0.222566667 |
| LOC100130623 | -0.008033333 | 0.1635       | 0.2368       | -0.143533333 |
| STS-1        | 1.0249       | 0.715966667  | -0.0106      | 0.3473       |
| LOC642741    | -0.003533333 | -0.003866667 | 0.122666667  | -0.163833333 |
| PDIA6        | 0.037466667  | -0.132633333 | 0.0813       | -0.204133333 |
| ZNF202       | 0.287466667  | 0.196366667  | 0.035333333  | -0.104566667 |
| AKAP1        | 0.194        | 0.2773       | 0.287633333  | 0.069766667  |
| KIAA0194     | 0.132533333  | 0.011566667  | 0.112633333  | -0.0127      |
| ZNF146       | 0.189733333  | 0.3006       | -8.00E-04    | -0.208166667 |
| FAM64A       | 0.2763       | 0.345133333  | 0.134766667  | 0.031033333  |
| CEP110       | 0.029133333  | 0.2156       | 0.343233333  | -0.0185      |
| STK25        | 0.235866667  | 0.1373       | 0.045966667  | -0.1594      |
| GPR3         | 0.5558       | 0.530666667  | 0.440966667  | 0.164933333  |
| MTCH2        | 0.0413       | 0.015633333  | 0.215833333  | -0.046533333 |
| C19orf24     | 0.126833333  | -0.0186      | 0.0359       | -0.073766667 |
| HNRPM        | 0.350133333  | 0.266366667  | 0.057433333  | 0.043033333  |
| HMMR         | 0.2592       | 0.185666667  | 0.142766667  | -0.158266667 |
| LOC285359    | 0.292633333  | 0.045966667  | 0.1121       | -0.2412      |
| NDUFB1       | -0.051466667 | 0.163866667  | 0.130966667  | -0.188666667 |
| PCYOX1L      | -0.144366667 | 0.1046       | 0.1907       | -0.238366667 |
| GGCT         | 0.197733333  | 0.2841       | 0.212066667  | 0.1221       |
| ERC1         | -0.078       | 0.200833333  | 0.0948       | -0.221966667 |
| LIPA         | -0.010933333 | 0.014933333  | 0.215566667  | -0.1504      |
| C20orf177    | 0.036733333  | 0.1096       | 0.048        | -0.110733333 |

|           |              |              |              |              |
|-----------|--------------|--------------|--------------|--------------|
| PJA1      | 0.0539       | -0.0244      | 0.060933333  | -0.2103      |
| RFC3      | 0.3842       | 0.040433333  | 0.272666667  | 0.061866667  |
| TMEM66    | 0.064366667  | -0.0216      | -0.0321      | -0.2241      |
| RNF26     | 0.2934       | 0.182833333  | 0.1542       | 0.017766667  |
| AKR1D1    | 0.106533333  | 0.244266667  | 0.409133333  | 0.0196       |
| DYNC2H1   | -0.120966667 | -0.0135      | 0.1387       | -0.290633333 |
| LOC646316 | 0.104566667  | 0.2705       | 0.1729       | -0.117933333 |
| BTG2      | 0.0564       | 0.073733333  | 0.2439       | -0.1564      |
| KIAA0090  | 0.0313       | 0.0471       | 0.113633333  | -0.117466667 |
| GBA       | -0.149633333 | -0.071266667 | 0.188566667  | -0.202933333 |
| PDIK1L    | 0.236066667  | 0.021933333  | 0.034266667  | -0.077533333 |
| PRPSAP2   | -0.032366667 | 0.103466667  | 0.1785       | -0.218466667 |
| ZNF558    | -0.0739      | 0.050166667  | -0.006133333 | -0.256966667 |
| DLEU2     | 0.389866667  | 0.269233333  | 0.234766667  | 0.1136       |
| KLF11     | -0.181033333 | -0.008933333 | -0.1395      | -0.5348      |
| DHX15     | 0.387866667  | 0.342433333  | 0.277266667  | 0.198933333  |
| HUWE1     | 0.0356       | 0.089166667  | 0.0726       | -0.1692      |
| LOC642590 | 0.461833333  | 0.432366667  | 0.034966667  | 0.0227       |
| PAAF1     | 0.0276       | 0.137733333  | 0.153766667  | -0.172166667 |
| NUBP1     | 0.296266667  | 0.2641       | 0.102666667  | 0.098333333  |
| ING1      | 0.327266667  | 0.319366667  | 0.121633333  | -0.012366667 |
| PA2G4     | 0.427666667  | 0.2628       | 0.229566667  | 0.045066667  |
| BFSP1     | 0.020533333  | -0.019833333 | 0.0117       | -0.248733333 |
| C20orf191 | -0.0398      | 0.0831       | 0.082933333  | -0.3732      |
| CSTB      | 0.067433333  | -0.0871      | 0.435        | -0.020966667 |
| HDLBP     | 0.377933333  | 0.128766667  | -0.035066667 | -0.1257      |
| ATP6V0E2  | -0.102233333 | 0.035266667  | 0.23         | -0.326366667 |
| TWIST1    | 0.167        | 0.1349       | 0.0168       | -0.095066667 |
| NCOA6IP   | 0.197133333  | 0.1609       | 0.185766667  | -0.033933333 |
| MRPL23    | 0.1392       | 0.146266667  | 0.088533333  | -0.130566667 |
| LOC648000 | 0.223833333  | 0.138533333  | 0.038466667  | -0.093166667 |
| RANBP2    | 0.160566667  | 0.0752       | 0.112366667  | -0.150066667 |
| TNFAIP8L1 | 0.3513       | 0.1179       | 0.132333333  | -0.1263      |
| SMPD2     | 0.1115       | 0.045066667  | 0.363933333  | -0.082133333 |
| FLVCR2    | 0.012966667  | -0.108366667 | 0.061966667  | -0.198333333 |
| ROBLD3    | -0.042466667 | 0.0111       | 0.032666667  | -0.246133333 |
| LBX2      | -0.013233333 | 0.209366667  | -0.045366667 | -0.1291      |
| TMEM194   | 0.1569       | 0.204066667  | 0.1601       | -0.248266667 |
| GALNT14   | 0.145966667  | 0.2226       | 0.242933333  | -0.0212      |
| TYRO3     | 0.1124       | 0.0826       | 0.1314       | -0.148766667 |
| SIAH2     | 0.132433333  | 0.058033333  | -0.001233333 | -0.101733333 |
| GTF3C1    | 0.120133333  | 0.215566667  | 0.072866667  | -0.180333333 |
| FAM119A   | 0.314566667  | 0.5124       | 0.370166667  | 0.174666667  |
| CHURC1    | -0.0247      | 0.103333333  | -0.079966667 | -0.197366667 |
| PHF13     | 0.3249       | -0.058333333 | 0.300966667  | -0.0865      |
| CBX6      | 0.1216       | 0.280666667  | 0.295966667  | -0.089166667 |
| ZNF559    | 0.1285       | 0.1433       | 0.1113       | -0.099366667 |

|              |              |              |              |              |
|--------------|--------------|--------------|--------------|--------------|
| LOC100134261 | 0.1231       | 0.1962       | 0.069166667  | -0.117866667 |
| RCE1         | 0.3227       | 0.145466667  | 0.0182       | -0.012066667 |
| EMR1         | 0.0992       | 0.112566667  | 0.196466667  | -0.101866667 |
| FLJ39827     | 0.245666667  | 0.056566667  | 0.102        | -0.040066667 |
| RBBP4        | -0.118966667 | 0.299433333  | 0.186766667  | -0.164066667 |
| FAM100A      | 0.146466667  | -0.116933333 | 0.069233333  | -0.1833      |
| FAM98A       | 0.351833333  | 0.328433333  | 0.002033333  | -0.065566667 |
| SCHIP1       | 0.705833333  | 0.3364       | 0.230333333  | 0.362166667  |
| SUCLG2       | -0.027866667 | -0.032566667 | 0.1098       | -0.3129      |
| PLA2G4A      | 0.087666667  | 0.196466667  | 0.1771       | -0.1251      |
| RAD51L1      | 0.2418       | 0.250933333  | 0.166566667  | -0.0275      |
| PTMA         | 0.165633333  | 0.431166667  | -0.055933333 | -0.101933333 |
| SNORD17      | 0.332133333  | 0.299033333  | 0.065166667  | -0.0013      |
| DHX9         | 0.287166667  | 0.136266667  | 0.148233333  | -0.1561      |
| LTV1         | 0.5498       | 0.371266667  | 0.3488       | 0.263        |
| TECR         | 0.006666667  | 0.0623       | 0.273533333  | -0.177066667 |
| MGC70857     | -0.003133333 | -0.011766667 | 0.0411       | -0.225866667 |
| MRTO4        | 0.3584       | 0.3976       | 0.091366667  | 0.156766667  |
| CEP350       | 0.178433333  | 0.2715       | 0.2167       | -0.0923      |
| PIGK         | -0.0921      | -0.1537      | 0.028733333  | -0.298666667 |
| DLD          | 0.209933333  | 0.019        | 0.1525       | -0.001866667 |
| NUDCD1       | 0.220533333  | 0.317033333  | 0.2738       | -0.0281      |
| UBAP2        | 0.247333333  | 0.2136       | 0.1027       | -0.0509      |
| C6orf120     | 0.0086       | -0.055       | 0.016466667  | -0.3255      |
| LOC642989    | -0.191033333 | 0.112333333  | 0.002        | -0.3808      |
| LOC651745    | -0.174133333 | 0.1304       | -0.0968      | -0.271233333 |
| SCYL1        | 0.2193       | -0.036066667 | -0.055966667 | -0.151033333 |
| MOV10        | 0.049233333  | 0.063566667  | 0.113066667  | -0.127566667 |
| GAGE12E      | 0.2382       | 0.0979       | 0.198366667  | -0.114033333 |
| POLR2H       | 0.3512       | 0.383766667  | 0.182766667  | 0.035        |
| EIF3E        | 0.036333333  | 0.157966667  | 0.055        | -0.118433333 |
| CEP135       | 0.384066667  | 0.307133333  | 0.199233333  | 0.131433333  |
| ZCWPW1       | -0.1999      | 0.0364       | -0.011033333 | -0.22        |
| ZNF200       | 0.35         | 0.217666667  | 0.2861       | 0.1427       |
| PPP1CA       | 0.3197       | 0.0687       | 0.2467       | 0.006066667  |
| NOP2         | 0.4639       | 0.4493       | 0.3632       | 0.202166667  |
| BLVRB        | -0.2618      | -0.118266667 | -0.0957      | -0.526233333 |
| DCLRE1C      | -0.049833333 | 0.238266667  | 0.240433333  | -0.067433333 |
| LOC729779    | -0.1859      | -0.391666667 | -0.090633333 | -0.453833333 |
| DIRC2        | 0.011566667  | 0.0809       | 0.2181       | -0.076933333 |
| ZNF672       | 0.1344       | 0.0952       | 0.196233333  | -0.164233333 |
| UBTF         | 0.1588       | 0.2743       | 0.0896       | -0.0021      |
| NRGN         | 0.277066667  | 0.164133333  | 0.321266667  | -0.083166667 |
| SYVN1        | 0.2125       | -0.015333333 | -0.132066667 | -0.243033333 |
| UTP23        | 0.1949       | 0.382633333  | 0.275133333  | 0.014933333  |
| DEPDC7       | 0.3904       | 0.3754       | 0.2341       | 0.163866667  |
| SNX12        | 0.1352       | 0.1218       | 0.113066667  | -0.174133333 |

|              |              |              |              |              |
|--------------|--------------|--------------|--------------|--------------|
| FZD9         | 0.224833333  | 0.109333333  | 0.2244       | -0.026366667 |
| LOC441896    | -0.5217      | 0.2624       | -0.543066667 | -0.818533333 |
| SLC24A1      | -0.300966667 | 0.049        | 0.276133333  | -0.332266667 |
| LOC442727    | 0.234266667  | 0.351233333  | 0.039966667  | -0.254066667 |
| RBL1         | 0.241966667  | 0.280666667  | 0.149333333  | -0.091533333 |
| ATG9A        | 0.0459       | 0.024333333  | 0.073066667  | -0.079266667 |
| FBXL10       | 0.2513       | 0.1256       | 0.2656       | -0.008633333 |
| SNHG6        | -0.013466667 | -0.153333333 | 0.225833333  | -0.2872      |
| DECR2        | -0.184533333 | 0.067033333  | 0.160566667  | -0.2987      |
| LOC100131261 | 0.259166667  | 0.247933333  | 0.1976       | 0.088366667  |
| CWC15        | 0.194666667  | 0.070166667  | 0.190866667  | -0.1213      |
| HNRPUL2      | 0.221366667  | 0.002833333  | -0.010166667 | -0.164966667 |
| PTBP1        | 0.408033333  | 0.226766667  | 0.115766667  | 0.0735       |
| SAE1         | 0.204466667  | 0.155466667  | 0.2161       | -0.044633333 |
| PSMA6        | 0.061966667  | 0.256466667  | 0.184333333  | -0.1292      |
| ARS2         | 0.468466667  | 0.1924       | 0.102433333  | 0.014633333  |
| LRRC45       | 0.069266667  | 0.1005       | 0.177466667  | -0.0552      |
| KBTBD4       | 0.036666667  | 0.0032       | 0.176966667  | -0.159733333 |
| CPSF3L       | 0.0919       | 0.1045       | 0.1552       | -0.198733333 |
| LYRM2        | 0.030333333  | -0.002966667 | 0.1227       | -0.137333333 |
| LAMA5        | -0.0333      | 0.106466667  | 0.0427       | -0.195266667 |
| TMEM17       | -0.053466667 | 0.107866667  | -0.110866667 | -0.2975      |
| QPCTL        | -0.042933333 | 0.0402       | 0.041233333  | -0.256666667 |
| SFPQ         | 0.343933333  | 0.043833333  | 0.4209       | 0.134966667  |
| MRPL4        | 0.406566667  | 0.306766667  | 0.177966667  | 0.140666667  |
| DTX3L        | 0.0678       | 0.194266667  | 0.220666667  | -0.087266667 |
| RPL30        | 0.062966667  | 0.0612       | 0.068033333  | -0.125566667 |
| FBXL5        | 0.0965       | 0.065566667  | 0.1935       | -0.165633333 |
| SNUPN        | 0.051233333  | 0.0551       | 0.120033333  | -0.271966667 |
| COL6A3       | 0.527233333  | 0.249366667  | -0.180166667 | 0.0375       |
| PCYT2        | -0.156566667 | 0.095033333  | 0.127866667  | -0.103166667 |
| NEDD9        | 0.5389       | 0.1035       | 0.020366667  | 0.173066667  |
| LOC653877    | 0.2226       | 0.237966667  | 0.285033333  | -0.145466667 |
| HMG20A       | -0.023866667 | 0.061333333  | 0.1411       | -0.1889      |
| ANKRD27      | 0.186866667  | 0.2093       | 0.277966667  | -0.078233333 |
| ZC3HAV1      | 0.0517       | 0.0982       | 0.1412       | -0.246233333 |
| FEM1A        | 0.290933333  | 0.256833333  | 0.119433333  | 0.130633333  |
| DRAP1        | 0.502666667  | 0.345933333  | 0.012733333  | 0.096933333  |
| IFNGR2       | 0.5073       | 0.466966667  | 0.336366667  | 0.208666667  |
| NOL6         | 0.224666667  | 0.338766667  | 0.068566667  | -0.0688      |
| RACGAP1      | 0.361733333  | 0.2914       | 0.182633333  | 0.0209       |
| DHRS13       | 0.192433333  | 0.132533333  | 0.264566667  | -0.081866667 |
| CDKN2C       | 0.033833333  | -0.297533333 | -0.1687      | -0.539833333 |
| LOC728453    | -0.0026      | -0.089733333 | 0.053133333  | -0.189133333 |
| C11orf1      | -0.114333333 | -0.0891      | 0.024866667  | -0.273533333 |
| TBCA         | 0.051466667  | 0.101233333  | 0.158666667  | -0.1347      |
| RAB2A        | 0.2177       | 0.229733333  | 0.063466667  | -0.045633333 |



|           |              |              |              |              |
|-----------|--------------|--------------|--------------|--------------|
| PHACTR4   | 0.065533333  | -0.1297      | -0.009566667 | -0.2023      |
| ATP6VOC   | 0.075466667  | 0.1103       | 0.171833333  | -0.077       |
| DNM1L     | 0.2217       | 0.278066667  | 0.280566667  | 0.034866667  |
| MTA1      | 0.0265       | 0.1535       | 0.023366667  | -0.2167      |
| MRPS26    | 0.250133333  | 0.229566667  | 0.131633333  | -0.011133333 |
| TMEM186   | 0.0579       | 0.071666667  | 0.1813       | -0.190133333 |
| OIP5      | 0.173866667  | 0.330466667  | 0.1443       | 0.033        |
| CCDC86    | 0.464233333  | 0.3126       | 0.2105       | 0.112066667  |
| LRRC40    | 0.163466667  | 0.263533333  | 0.318833333  | -0.016933333 |
| ICK       | -0.071233333 | 0.0241       | 0.190233333  | -0.145533333 |
| AQP11     | -0.082933333 | -0.0394      | -0.059333333 | -0.253133333 |
| NUF2      | 0.386733333  | 0.1745       | 0.0451       | -0.065666667 |
| INTS7     | -0.0135      | 0.202533333  | 0.1243       | -0.0752      |
| SENP7     | -0.076766667 | 0.260266667  | 0.046833333  | -0.220666667 |
| STIM2     | 0.0614       | 0.0546       | 0.1943       | -0.107866667 |
| ZNF252    | -0.1658      | 0.045366667  | -0.0096      | -0.273966667 |
| SELI      | 0.184766667  | 0.2428       | 0.217233333  | -0.062266667 |
| C19orf22  | 0.169433333  | 0.0984       | -0.049133333 | -0.142566667 |
| INTS5     | 0.148266667  | 0.092466667  | 0.131466667  | -0.052233333 |
| IARS2     | 0.018033333  | 0.1037       | 0.0847       | -0.1371      |
| TRIM24    | 0.344366667  | 0.3382       | 0.134633333  | 0.1765       |
| POLR2A    | 0.171366667  | 0.1549       | 0.0853       | -0.1984      |
| LOC440353 | -0.049666667 | -0.069433333 | -0.045566667 | -0.251633333 |
| ZC3H4     | 0.126766667  | 0.265        | 0.291333333  | -6.67E-05    |
| UQCRC2    | -0.033566667 | 0.090966667  | 0.1619       | -0.289666667 |
| CSRP2BP   | 0.332333333  | 0.2661       | 0.132866667  | -0.019066667 |
| ZNF697    | 0.680366667  | 0.5023       | 0.5099       | 0.418166667  |
| FAM161A   | -0.167266667 | 0.066666667  | 0.4373       | -0.170966667 |
| WDR18     | 0.1731       | 0.031166667  | 0.1757       | -0.115433333 |
| ANKRD33   | -0.242366667 | -0.241       | 0.1526       | -0.249733333 |
| MED26     | 0.203066667  | 0.169666667  | 0.032566667  | -0.1072      |
| C11orf75  | 0.1947       | 0.1069       | -0.034466667 | -0.1967      |
| ALG10     | 0.217766667  | 0.3444       | 0.358866667  | 0.195566667  |
| DTL       | 0.0622       | 0.401133333  | 0.3875       | -0.0245      |
| DDX5      | 0.3614       | 0.190966667  | 0.182033333  | 0.111966667  |
| LOC645743 | 0.077266667  | 0.2991       | 0.247666667  | -0.137766667 |
| CDK5      | 0.0216       | 0.021766667  | 0.165233333  | -0.112966667 |
| RBM4      | 0.214366667  | 0.238533333  | 0.178833333  | -0.1597      |
| CRTAP     | -0.103666667 | -0.1916      | 0.080466667  | -0.341466667 |
| SNORA59A  | 0.2182       | 0.303566667  | 0.1465       | -0.106566667 |
| ATAD3A    | 0.394533333  | 0.4659       | 0.011466667  | -0.003066667 |
| POLR3GL   | -0.183933333 | 0.093366667  | 0.167533333  | -0.316233333 |
| LOC399988 | 0.056633333  | 0.3068       | 0.464066667  | 0.029866667  |
| NAAA      | -0.044833333 | 0.132133333  | -0.066233333 | -0.2942      |
| HERC1     | -0.0131      | 0.065166667  | 0.185566667  | -0.221666667 |
| DLX1      | 0.336366667  | 0.313733333  | 0.067366667  | -0.0019      |
| FBXO34    | 0.182        | 0.043666667  | 0.1707       | -0.116966667 |

|           |              |              |              |              |
|-----------|--------------|--------------|--------------|--------------|
| MEX3D     | 0.318733333  | 0.270066667  | 0.075733333  | -0.060966667 |
| SF3A2     | 0.338266667  | 0.120233333  | -0.073566667 | -0.097166667 |
| SPIN4     | 0.3947       | 0.5886       | 0.296        | 0.140033333  |
| TLL1      | -0.2108      | -0.0183      | 0.085333333  | -0.2252      |
| RAD54L    | 0.245366667  | 0.235966667  | 0.234233333  | 0.008066667  |
| MND1      | 0.221533333  | 0.2748       | 0.087566667  | -0.070966667 |
| NUMBL     | 0.313333333  | -0.0036      | 0.030233333  | -0.203066667 |
| CLYBL     | -0.173566667 | -0.176333333 | 0.1055       | -0.379766667 |
| LOC345041 | 0.3767       | 0.231866667  | 0.2802       | 0.011833333  |
| TCEA1     | -0.014       | 0.053033333  | -0.0704      | -0.230233333 |
| C19orf54  | -0.074633333 | 0.0882       | 0.221766667  | -0.190666667 |
| CC2D2A    | 0.092433333  | 0.123066667  | 0.413766667  | -0.069533333 |
| FAHD1     | -0.078266667 | -0.137166667 | 0.0973       | -0.344333333 |
| AP3D1     | 0.118833333  | 0.150866667  | 0.339333333  | -0.085733333 |
| FER1L3    | 0.679366667  | 0.260166667  | -0.487066667 | 0.0758       |
| SEPX1     | -0.1831      | 0.038533333  | 0.0603       | -0.3401      |
| IGF2R     | -0.2581      | -0.081433333 | 0.1506       | -0.354266667 |
| FANCG     | 0.160566667  | 0.180733333  | 0.214233333  | -0.087033333 |
| ADCY9     | -0.1008      | -0.041133333 | 0.102366667  | -0.060266667 |
| NKAP      | 0.102666667  | 0.200966667  | 0.1032       | -0.050033333 |
| C21orf119 | 0.028766667  | 0.0563       | 0.1798       | -0.102433333 |
| TOM1L2    | 0.232366667  | 0.342033333  | 0.055766667  | -0.156533333 |
| BRP44L    | 0.012666667  | -0.010566667 | 0.116233333  | -0.1058      |
| STX6      | 0.223966667  | -0.020266667 | 0.2369       | -0.083266667 |
| UBR7      | 0.262266667  | 0.250833333  | 0.173933333  | -0.0151      |
| MFSD8     | 0.198        | 0.1345       | 0.193466667  | -0.027366667 |
| DHX34     | 0.1848       | 0.3705       | 0.089733333  | -0.044733333 |
| LOC650518 | 0.175966667  | 0.228733333  | 0.128933333  | 0.015866667  |
| 14-Sep    | 0.186733333  | 0.107633333  | 0.177033333  | -0.1086      |
| RAB4B     | -0.0499      | 0.059566667  | 0.101366667  | -0.162233333 |
| TMEM134   | -0.142366667 | -0.047066667 | 0.106066667  | -0.3869      |
| ACOX1     | 0.034833333  | 0.009866667  | 0.032333333  | -0.297766667 |
| DHTKD1    | 0.3338       | 0.163733333  | 0.196633333  | -0.0832      |
| FLJ46552  | 0.137933333  | 0.307733333  | 0.4543       | 0.166466667  |
| ILF3      | 0.3518       | 0.1788       | 0.2762       | 0.0765       |
| PRIM1     | 0.186233333  | 0.307        | 0.170666667  | 0.005766667  |
| CCNA2     | 0.351633333  | 0.259966667  | 0.0277       | -0.037366667 |
| RBM14     | 0.418433333  | 0.2418       | 0.1561       | -0.034133333 |
| GPR137    | -0.022566667 | -0.006433333 | 0.165666667  | -0.124333333 |
| RNF126    | 0.628866667  | 0.263833333  | 0.449233333  | 0.393666667  |
| ZNF407    | 0.149533333  | 0.126        | 0.187966667  | -0.064033333 |
| DAD1      | 0.1818       | 0.091933333  | 0.095566667  | -0.093       |
| IFI35     | -0.141666667 | 0.043766667  | 0.410233333  | -0.175933333 |
| MTX2      | 0.150266667  | 0.118833333  | 0.094033333  | -0.132233333 |
| HIRIP3    | 0.113933333  | 0.1417       | 0.113566667  | -0.096333333 |
| BEND3     | 0.066166667  | 0.310566667  | 0.2189       | -0.1701      |
| RRM2B     | 0.0111       | 0.057333333  | 0.0644       | -0.1603      |

|              |              |              |              |              |
|--------------|--------------|--------------|--------------|--------------|
| IMMT         | 0.159766667  | 0.162266667  | 0.2567       | -0.045966667 |
| MTMR10       | -0.029966667 | 0.0109       | 0.103866667  | -0.157866667 |
| ANKRD17      | 0.1841       | -0.085766667 | 0.143433333  | -0.1811      |
| ZCCHC3       | 0.129966667  | 0.138466667  | 0.2598       | -0.050233333 |
| LOC730024    | 0.074533333  | 0.232733333  | 0.145866667  | -0.1477      |
| CXorf39      | 0.251833333  | 0.263733333  | 0.1717       | -0.105566667 |
| TBCB         | 0.1163       | 0.139933333  | -0.053966667 | -0.146133333 |
| NEFL         | 0.1471       | 0.1719       | 0.2909       | 0.0692       |
| EAPP         | -0.023333333 | -0.065366667 | -0.0792      | -0.440933333 |
| C12orf4      | -0.014966667 | 0.2324       | 0.127266667  | -0.3001      |
| COX7B        | 0.210333333  | 0.0511       | 0.1579       | -0.154533333 |
| ISOC1        | 0.121433333  | 0.400266667  | 0.4223       | 0.102433333  |
| ANXA4        | -0.1336      | -0.1187      | -0.022366667 | -0.425       |
| LOC643310    | -0.101633333 | -0.072533333 | 0.068066667  | -0.408466667 |
| YEATS4       | 0.218966667  | 0.129966667  | 0.165533333  | -0.048566667 |
| CCDC138      | 0.359433333  | 0.275466667  | 0.256233333  | 0.064366667  |
| FAM162A      | -0.1603      | 0.111633333  | 0.1288       | -0.4755      |
| LIN7C        | 0.198033333  | 0.4335       | 0.174966667  | -0.053533333 |
| C1orf97      | 0.004733333  | 0.176066667  | 0.260766667  | -0.182533333 |
| NGDN         | 0.3858       | 0.211733333  | 0.148633333  | 0.028833333  |
| NCOA1        | 0.056566667  | -0.172566667 | 0.073466667  | -0.205433333 |
| ZNF34        | 0.016533333  | -0.028566667 | -0.067566667 | -0.136433333 |
| XAB2         | 0.064966667  | 0.059866667  | -0.032833333 | -0.174666667 |
| DDX27        | 0.185766667  | 0.184433333  | 0.0944       | -0.3186      |
| TMSB15A      | 0.2128       | 0.204066667  | 0.2796       | -0.025033333 |
| ZBTB41       | 0.082166667  | -0.049633333 | 0.1742       | -0.187366667 |
| RBM45        | 0.1773       | 0.1371       | 0.1023       | -0.044033333 |
| CCT3         | 0.1683       | 0.3456       | 0.135466667  | -0.013133333 |
| DCK          | 0.374333333  | 0.210166667  | 0.470333333  | 0.0871       |
| PLCG1        | 0.113666667  | 0.053133333  | 0.1768       | -0.118       |
| GTF2H5       | 0.0455       | 0.0556       | 0.071966667  | -0.241033333 |
| CBR4         | -0.0318      | -0.0395      | 0.126266667  | -0.4093      |
| ZNF142       | 0.1677       | 0.101        | 0.112866667  | -0.001033333 |
| LOC643778    | 0.0745       | 0.0644       | 0.1104       | -0.191033333 |
| POLR1B       | -0.009766667 | 0.303433333  | 0.452633333  | -0.035133333 |
| ATP5O        | 0.132566667  | 0.051766667  | 0.1374       | -0.070466667 |
| STXBP3       | 0.183033333  | -0.060033333 | 0.047433333  | -0.162866667 |
| C16orf33     | 0.1861       | 0.2545       | 0.270633333  | -0.0029      |
| LOC400948    | 0.108966667  | 0.176033333  | 0.1541       | -0.06        |
| PRR13        | 0.0289       | 0.345033333  | 0.183233333  | -0.005       |
| ZNF616       | -0.009766667 | -0.027766667 | 0.111633333  | -0.111966667 |
| LOC100128731 | 0.155266667  | 0.1579       | 0.1428       | -0.1935      |
| SP3          | 0.215566667  | -0.019666667 | 0.043733333  | -0.1858      |
| LSS          | -0.072966667 | -0.0651      | 0.1575       | -0.0805      |
| LSM2         | 0.083566667  | 0.324966667  | 0.295533333  | -0.0749      |
| HS2ST1       | 0.097966667  | 0.0898       | 0.2602       | -0.181366667 |
| Magmas       | 0.247633333  | 0.282133333  | 0.260466667  | 0.018033333  |

|              |              |              |              |              |
|--------------|--------------|--------------|--------------|--------------|
| SH3BGRL      | -0.203333333 | -0.318833333 | 0.197833333  | -0.349666667 |
| TXNDC11      | 0.286733333  | 0.155233333  | 0.0534       | -0.0724      |
| SEMA4C       | 0.2245       | 0.097666667  | 0.336566667  | -0.0054      |
| GINS2        | 0.277233333  | 0.345        | 0.1861       | -0.025433333 |
| CADPS2       | -0.058933333 | 0.067033333  | -0.038       | -0.2346      |
| C3orf34      | 0.220833333  | 0.3074       | 0.3203       | 0.009266667  |
| LOC644214    | 0.329733333  | 0.3379       | 0.225666667  | -0.022233333 |
| MRPL19       | 0.195466667  | 0.3013       | 0.125333333  | -0.177833333 |
| C3orf37      | 0.211666667  | 0.1314       | 0.205333333  | 0.0538       |
| SIVA         | 0.218366667  | 0.2106       | 0.180766667  | 0.030766667  |
| C22orf29     | 0.1929       | 0.1631       | 0.0208       | -0.061433333 |
| ANKRD12      | -0.0147      | 0.060733333  | 0.053666667  | -0.0661      |
| LOC100131196 | 0.0747       | 0.029966667  | 0.1069       | -0.168666667 |
| KLF13        | 0.2077       | 0.036933333  | 0.176        | 0.011466667  |
| RECQL4       | 0.2248       | 0.257533333  | 0.306533333  | -0.085266667 |
| C8orf51      | 0.071033333  | 0.116433333  | 0.1347       | -0.159933333 |
| C20orf196    | 0.0279       | 0.104233333  | 0.081233333  | -0.104633333 |
| C4orf16      | 0.027366667  | 0.170833333  | 0.1314       | -0.256366667 |
| ACAP2        | -0.0305      | -0.058466667 | 0.076333333  | -0.3051      |
| FASTKD5      | 0.3785       | 0.2435       | 0.237533333  | 0.037533333  |
| LOC729952    | 0.247466667  | 0.1629       | 0.2292       | -0.0233      |
| MFGE8        | -0.0201      | -0.107933333 | 0.115633333  | -0.1523      |
| XPNPEP1      | 0.0383       | 0.017566667  | 0.3135       | -0.193333333 |
| HAUS4        | -0.020466667 | 0.003166667  | 0.0886       | -0.2699      |
| GSTP1        | -0.0066      | -0.005233333 | 0.079066667  | -0.289166667 |
| SCAND1       | 0.021        | 0.106933333  | 0.1445       | -0.211066667 |
| WDHD1        | 0.146566667  | 0.309566667  | 0.3046       | -0.0631      |
| LOC728263    | 0.1242       | 0.178933333  | 0.081866667  | -0.097766667 |
| BTBD1        | 0.024266667  | 0.1234       | 0.165333333  | -0.1456      |
| C2orf47      | 0.093366667  | 0.299266667  | 0.1642       | 0.014566667  |
| LYSMD2       | 0.351        | 0.2168       | 0.272866667  | 0.041733333  |
| RAB7A        | -0.1221      | -0.021366667 | 0.193533333  | -0.314566667 |
| C9orf23      | -0.278466667 | -0.0772      | 0.1077       | -0.3619      |
| CEBPZ        | 0.125        | 0.295033333  | 0.309066667  | -0.031933333 |
| TAF1B        | 0.1577       | 0.201466667  | 0.243166667  | -0.0301      |
| C19orf61     | 0.405966667  | 0.318033333  | 0.113333333  | 0.088733333  |
| C3orf14      | 0.055433333  | 0.056533333  | -0.034533333 | -0.134266667 |
| GGCX         | 0.033233333  | -0.0354      | 0.028533333  | -0.339966667 |
| SKI          | 0.346433333  | 0.2246       | 0.2606       | 0.082033333  |
| HIST1H4C     | 0.1532       | 0.261        | 0.3322       | 0.014833333  |
| MSH2         | 0.231966667  | 0.332666667  | 0.1396       | -0.093666667 |
| SRGAP2L      | 0.245966667  | 0.113233333  | 0.145566667  | -0.196666667 |
| RNASE4       | -0.1201      | -0.032833333 | -0.107166667 | -0.350766667 |
| RRP1B        | 0.350166667  | 0.317633333  | 0.289766667  | 0.086833333  |
| ACVR1        | 0.3944       | 0.1344       | 0.1603       | -0.032833333 |
| TBC1D9       | 0.344233333  | 0.248        | 0.089433333  | -0.032066667 |
| WDR68        | 0.3195       | 0.152466667  | 0.256133333  | 0.027866667  |

|              |              |              |              |              |
|--------------|--------------|--------------|--------------|--------------|
| LOC643035    | 0.006566667  | 0.0633       | 0.2992       | 0.055966667  |
| AP1M1        | 0.204        | 0.408133333  | 0.305333333  | 0.069866667  |
| NDFIP1       | -0.0799      | -0.050766667 | 0.114233333  | -0.370833333 |
| WDYHV1       | -0.061266667 | 0.2398       | 0.1732       | -0.2747      |
| NNT          | -0.119766667 | -0.333966667 | 0.1624       | -0.312766667 |
| DYNLT1       | 0.169266667  | 0.132466667  | 0.324466667  | -0.041233333 |
| RNU4ATAC     | 0.217        | 0.431233333  | 0.310766667  | -0.191233333 |
| RNF31        | 0.1366       | -0.0167      | 0.1275       | -0.2846      |
| HADH2        | 0.1147       | 0.154933333  | 0.173366667  | -0.0513      |
| GPR161       | 0.113066667  | 0.190333333  | 0.331933333  | -0.0337      |
| CCDC5        | 0.363766667  | 0.131033333  | 0.300466667  | 0.038766667  |
| EWSR1        | 0.579133333  | 0.184866667  | 0.1881       | 0.1887       |
| SEC63        | 0.165966667  | 0.1624       | 0.227333333  | -0.066566667 |
| LOC441155    | 0.064766667  | 0.201566667  | 0.296066667  | -0.182133333 |
| FOXJ3        | 0.131033333  | 0.0817       | 0.102833333  | -0.161533333 |
| ZC3HC1       | 0.300233333  | 0.1688       | 0.213933333  | 0.030233333  |
| LOC100129379 | 0.005833333  | 0.059866667  | -0.030133333 | -0.345933333 |
| E2F6         | 0.183533333  | 0.179133333  | 0.154        | -0.035333333 |
| SPHAR        | 0.028266667  | 0.164        | 0.135        | -0.165466667 |
| MGC12965     | -0.131433333 | -0.1317      | -0.0951      | -0.371166667 |
| VCPIP1       | 0.1121       | -0.063666667 | -0.009933333 | -0.2049      |
| TMEM194A     | 0.216133333  | 0.299466667  | 0.303133333  | -0.047233333 |
| LSM14A       | 0.334033333  | 0.1295       | 0.154466667  | -0.021166667 |
| GBA2         | 0.130666667  | 0.0619       | 0.1821       | -0.034866667 |
| DDOST        | -0.0352      | 0.003833333  | 0.065333333  | -0.247933333 |
| FARSA        | 0.439066667  | 0.2442       | 0.138866667  | 0.0295       |
| BIRC6        | 0.023633333  | 0.141366667  | 0.179366667  | -0.340933333 |
| HNRPR        | 0.319666667  | 0.3024       | 0.098533333  | -0.157933333 |
| BBS7         | 0.168433333  | 0.188533333  | 0.055133333  | -0.165433333 |
| PRUNE        | -0.022966667 | 0.153366667  | 0.2053       | -0.079633333 |
| ZBTB25       | -0.000833333 | 0.082833333  | 0.039333333  | -0.3525      |
| TTK          | 0.475966667  | 0.2644       | 0.033233333  | -0.007466667 |
| PET112L      | -0.035       | -0.066566667 | 0.041366667  | -0.3147      |
| SNX17        | -0.0498      | 0.073833333  | 0.129933333  | -0.226366667 |
| LMCD1        | 0.345133333  | 0.299433333  | 0.129933333  | 0.077266667  |
| CXorf12      | -0.317333333 | 0.001        | 0.092433333  | -0.456366667 |
| TTYH3        | -0.01        | 0.070633333  | 0.130233333  | -0.1296      |
| BST2         | 0.129166667  | 0.154133333  | 0.165866667  | -0.165866667 |
| DEPDC5       | 0.018933333  | 0.093133333  | 0.092833333  | -0.288833333 |
| SNHG3-RCC1   | 0.4471       | 0.4933       | 0.154433333  | 0.135466667  |
| TRIP12       | 0.257466667  | 0.221        | 0.1908       | -0.058433333 |
| GULP1        | 0.387666667  | 0.3065       | -0.155166667 | -0.018666667 |
| GALNT11      | -0.0558      | 0.171        | 0.293533333  | -0.198833333 |
| CHTF18       | 0.252266667  | 0.232566667  | 0.189666667  | -0.092733333 |
| C22orf28     | 0.228766667  | 0.144966667  | 0.173666667  | -0.082133333 |
| UPF1         | 0.289733333  | 0.1688       | 0.0584       | -0.124933333 |
| ZNHIT6       | 0.2227       | 0.178933333  | 0.2329       | -0.0347      |

|              |              |              |              |              |
|--------------|--------------|--------------|--------------|--------------|
| EN2          | 0.139        | 0.247566667  | 0.135933333  | -0.032       |
| THAP6        | 0.0817       | 0.257766667  | 0.267966667  | -0.0911      |
| POLE4        | 0.189466667  | 0.1482       | 0.0588       | -0.048766667 |
| LOC643856    | 0.096133333  | 0.259166667  | 0.119633333  | -0.035266667 |
| LOC645904    | 0.135633333  | 0.188333333  | 0.323466667  | 0.039333333  |
| PM20D2       | 0.442266667  | 0.4592       | 0.3085       | 0.032966667  |
| HSP90AA1     | 0.310333333  | 0.3828       | 0.281266667  | -0.0511      |
| ACO2         | 0.0387       | 0.084433333  | 0.181766667  | -0.169433333 |
| SEC24B       | 0.221766667  | 0.146233333  | 0.1444       | -0.1518      |
| PI4KAP2      | -0.0044      | -0.045666667 | 0.067166667  | -0.401633333 |
| EID2B        | 0.229433333  | 0.3425       | 0.3339       | 0.04         |
| SNRPN        | -0.040733333 | -0.010366667 | 0.141033333  | -0.248366667 |
| CDC20        | 0.501933333  | 0.346        | 0.06         | 0.0539       |
| SLC25A16     | 0.154933333  | 0.123866667  | 0.043066667  | -0.1696      |
| NAV1         | 0.0461       | 0.057833333  | 0.2777       | -0.2168      |
| TMEM55B      | 0.153466667  | -0.005366667 | 0.2104       | -0.127066667 |
| GALNT2       | 0.213466667  | 0.1919       | 0.1834       | 0.063366667  |
| OSGIN1       | 0.330566667  | 0.254466667  | -0.1325      | 0.0255       |
| LEPROTL1     | 0.042433333  | 0.0951       | 0.087133333  | -0.359233333 |
| MCM3         | 0.323733333  | 0.3133       | 0.266366667  | 0.0606       |
| SR140        | 0.412733333  | 0.350866667  | 0.218966667  | 0.026733333  |
| MGAT2        | 0.4131       | 0.2153       | 0.179666667  | -0.0534      |
| RFXANK       | 0.137033333  | 0.134666667  | 0.183233333  | -0.116566667 |
| NUP133       | 0.0577       | -0.0039      | 0.215766667  | -0.195466667 |
| ESCO1        | 0.020433333  | -0.0961      | 0.136166667  | -0.208166667 |
| ZNF845       | 0.055266667  | 0.2026       | 0.1738       | -0.071066667 |
| GLRX5        | 0.107833333  | 0.144266667  | 0.165133333  | -0.011       |
| C19orf2      | 0.146833333  | 0.079066667  | 0.245733333  | -0.1012      |
| PNN          | 0.5216       | 0.385333333  | 0.337333333  | 0.1103       |
| HAGH         | -0.0264      | 0.1069       | 0.097366667  | -0.270866667 |
| VRK3         | -0.105166667 | 0.023866667  | -0.101033333 | -0.389366667 |
| PHF20L1      | 0.063266667  | 0.060366667  | 0.071366667  | -0.2252      |
| TRMT112      | 0.198733333  | 0.206466667  | 0.1795       | -0.126333333 |
| ADRBK1       | 0.2055       | 0.197466667  | 0.3062       | -0.164766667 |
| C2orf49      | 0.310133333  | 0.323333333  | 0.1836       | -0.050366667 |
| GDAP1        | 0.0207       | 0.106466667  | 0.1174       | -0.2383      |
| XPO4         | 0.1275       | 0.135666667  | 0.308733333  | -0.207933333 |
| ATP6AP1      | -0.066366667 | -0.1148      | 0.0044       | -0.285666667 |
| LOC100132439 | -0.023266667 | 0.0428       | 0.048433333  | -0.182266667 |
| LOC727773    | 0.1895       | 0.158133333  | 0.317333333  | 0.0229       |
| FGGY         | -0.115733333 | 0.030666667  | 0.037366667  | -0.309066667 |
| LOC552889    | 0.1407       | 0.019        | 0.156166667  | -0.140066667 |
| DDHD2        | 0.1957       | 0.169766667  | 0.189933333  | -0.114666667 |
| NOMO3        | 0.051266667  | -0.101466667 | 0.0379       | -0.298366667 |
| STARD7       | 0.1291       | 0.205966667  | 0.2596       | 0.035066667  |
| ENY2         | 0.277566667  | 0.252        | 0.031166667  | 0.0551       |
| MED19        | 0.2267       | 0.113866667  | -0.0003      | -0.238333333 |

|              |              |              |              |              |
|--------------|--------------|--------------|--------------|--------------|
| C2orf42      | -0.147333333 | 0.050466667  | -0.016033333 | -0.2636      |
| ZNF439       | 0.089433333  | 0.089266667  | 0.083233333  | -0.221566667 |
| RAD51AP1     | 0.4253       | 0.236366667  | 0.2009       | -0.0206      |
| PIN1         | 0.110033333  | 0.2007       | 0.196833333  | -0.099666667 |
| TSPAN33      | 0.0682       | 0.143666667  | 0.132633333  | -0.128666667 |
| SNURF        | 0.069166667  | -0.2454      | 0.085566667  | -0.481466667 |
| CSRNP2       | 0.2238       | -0.012433333 | 0.171766667  | -0.022333333 |
| FKBP5        | 0.249633333  | 0.152566667  | 0.319433333  | -0.013933333 |
| CFL1         | 0.361566667  | 0.253866667  | 0.121033333  | -0.052533333 |
| MIPEP        | -0.0084      | 0.099866667  | 0.139866667  | -0.208033333 |
| MEGF8        | 0.097266667  | -0.147533333 | 0.1361       | -0.242933333 |
| KNTC1        | 0.280133333  | 0.253233333  | 0.239766667  | -0.0738      |
| TMBIM1       | 0.019133333  | -0.062533333 | -0.047233333 | -0.351166667 |
| SRRD         | 0.168633333  | 0.1278       | 0.126666667  | -0.0473      |
| AXIN1        | 0.228366667  | 0.083233333  | 0.1133       | 0.0005       |
| PANK3        | 0.048266667  | 0.1235       | 0.292866667  | -0.1178      |
| FOS          | 0.421466667  | -0.031433333 | 0.291733333  | 0.0194       |
| PSMB5        | 0.2279       | 0.208766667  | 0.1392       | -0.125833333 |
| LOC653888    | 0.013066667  | 0.1398       | 0.19         | -0.2537      |
| MAGEF1       | 0.205266667  | 0.085        | -0.002933333 | -0.189033333 |
| LOC100134504 | -0.127       | 0.0849       | -0.010833333 | -0.343266667 |
| LOC100127983 | 0.255133333  | 0.239733333  | 0.160566667  | -0.117166667 |
| CHD1L        | 0.15         | 0.148233333  | 0.3947       | -0.004066667 |
| ELMOD2       | 0.063666667  | 0.246366667  | 0.1691       | -0.038233333 |
| H2AFZ        | 0.178866667  | 0.304433333  | 0.212266667  | 0.0068       |
| TMEM136      | -0.1207      | 0.073633333  | 0.055766667  | -0.3735      |
| SOX18        | 0.175566667  | 0.085066667  | 0.181966667  | -0.219833333 |
| EHD4         | 0.265033333  | 0.188166667  | 0.246033333  | 0.0674       |
| ZCCHC24      | -0.006033333 | 0.225833333  | 0.391766667  | -0.148966667 |
| IREB2        | 0.277433333  | 0.185266667  | 0.1873       | -0.0632      |
| ZNF766       | -0.054433333 | 0.1026       | 0.062233333  | -0.272633333 |
| LOC100128288 | 0.337766667  | 0.4424       | 0.479533333  | 0.0639       |
| ARID5B       | 0.120733333  | -0.175633333 | -0.101366667 | -0.4025      |
| HMGB2        | 0.4684       | 0.387233333  | 0.090433333  | -0.007266667 |
| LOC100132742 | 0.076333333  | 0.093033333  | 0.159666667  | -0.22        |
| LOC389465    | 0.1887       | 0.3066       | 0.222133333  | -0.1415      |
| CAPRIN1      | -0.076466667 | 0.159533333  | 0.125966667  | -0.202866667 |
| ARSA         | -0.115433333 | 0.0483       | -0.000733333 | -0.258566667 |
| LOC643336    | 0.439766667  | 0.261        | 0.2291       | -0.029233333 |
| LOC100130556 | 0.1496       | 0.0778       | 0.171633333  | -0.250866667 |
| NUCKS1       | 0.032133333  | 0.2407       | 0.5464       | -0.272533333 |
| RBM23        | 0.1482       | 0.105433333  | 0.072066667  | -0.078633333 |
| LOC390354    | 0.141        | -0.031266667 | 0.128333333  | -0.285033333 |
| RNF130       | -0.0534      | 0.004133333  | 0.043533333  | -0.292266667 |
| UBXN1        | 0.007533333  | -0.021233333 | 0.044633333  | -0.244733333 |
| HNRPA2B1     | 0.375166667  | 0.295366667  | 0.2554       | 0.0119       |
| SPAG9        | 0.181233333  | 0.207166667  | 0.129066667  | -0.127466667 |

|              |              |              |              |              |
|--------------|--------------|--------------|--------------|--------------|
| CCDC34       | 0.228566667  | 0.264        | 0.1524       | -0.049633333 |
| C2orf56      | 0.088366667  | 0.216966667  | 0.2915       | -0.010933333 |
| ASB13        | -0.207266667 | -0.022933333 | 0.044133333  | -0.451266667 |
| FAM158A      | 0.166        | 0.251266667  | 0.420433333  | -0.157833333 |
| SLC25A33     | 0.156133333  | 0.324666667  | 0.147866667  | -0.190733333 |
| TRAM1        | 0.2524       | 0.0461       | -0.0628      | -0.294833333 |
| KIF18A       | 0.415933333  | 0.2969       | 0.310333333  | 0.036033333  |
| LOC646609    | 0.1541       | 0.2404       | 0.152033333  | -0.138166667 |
| CCDC43       | 0.027933333  | 0.165133333  | 0.206733333  | -0.2527      |
| DSG2         | 0.1924       | 0.350066667  | 0.2555       | -0.0473      |
| ALG14        | -0.013866667 | 0.0391       | 0.275333333  | -0.098966667 |
| LOC647691    | 0.0993       | 0.3892       | 0.3058       | -0.1188      |
| HSD17B10     | 0.1573       | 0.0582       | 0.217366667  | -0.047766667 |
| COMMD5       | 0.124233333  | 0.053133333  | -0.070533333 | -0.1411      |
| ARSD         | -0.151833333 | -0.009766667 | 0.0894       | -0.164133333 |
| MED28        | 0.232466667  | 0.0515       | 0.049633333  | -0.074833333 |
| THAP4        | 0.196933333  | 0.3753       | 0.130866667  | -0.0793      |
| CARS2        | 0.047366667  | 0.2059       | 0.1324       | -0.207466667 |
| IL11RA       | 0.059766667  | -0.041666667 | 0.026666667  | -0.240833333 |
| CHEK1        | 0.369733333  | 0.405833333  | 0.204766667  | 0.071166667  |
| LZTR1        | 0.036666667  | 0.0558       | 0.110433333  | -0.205233333 |
| C1orf50      | 0.169933333  | 0.114233333  | 0.010833333  | -0.181633333 |
| LOC644563    | 0.283733333  | 0.310366667  | 0.162166667  | 0.0088       |
| RAB1B        | 0.1765       | 0.209333333  | 0.0721       | -0.2972      |
| CCT8         | 0.380833333  | 0.309366667  | 0.2088       | 0.184933333  |
| MUDENG       | 0.052633333  | 0.086866667  | 0.1884       | -0.228966667 |
| C7orf59      | 0.099666667  | -0.040066667 | 0.2417       | -0.251866667 |
| LTBR         | 0.2759       | 0.256633333  | 0.152966667  | -0.0092      |
| ATP5C1       | 0.2045       | 0.235333333  | 0.317233333  | -0.019       |
| FASTKD2      | 0.149133333  | 0.233933333  | 0.281666667  | 0.0044       |
| B3GAT3       | 0.086433333  | 0.175033333  | 0.279233333  | -0.101133333 |
| MED14        | 0.210266667  | 0.097266667  | 0.289366667  | -0.067366667 |
| LOC100134393 | 0.3244       | 0.6424       | 0.588366667  | 0.075866667  |
| TMEM126A     | 0.244233333  | 0.244133333  | 0.1591       | 0.042733333  |
| VPS37C       | 0.2005       | 0.145933333  | 0.1639       | -0.0389      |
| PAQR8        | -0.283233333 | 0.055066667  | 0.245833333  | -0.361733333 |
| EFNA1        | -0.1603      | 0.024266667  | 0.145        | -0.268933333 |
| TBC1D8       | 0.1005       | 0.120766667  | 0.2245       | -0.1832      |
| LOC729513    | -0.000666667 | 0.239266667  | 0.4307       | -0.191633333 |
| RASAL2       | 0.380166667  | 0.1802       | 0.096233333  | -0.026133333 |
| MPPE1        | -0.117066667 | -0.0158      | 0.0047       | -0.431233333 |
| SERTAD4      | 1.019566667  | 0.293733333  | -0.138166667 | 0.216366667  |
| HEATR1       | 0.345833333  | 0.5201       | 0.395        | 0.070633333  |
| LOC100131940 | 0.141933333  | 0.201933333  | 0.077366667  | -0.205566667 |
| EIF3D        | 0.1987       | 0.0302       | 0.077266667  | -0.130066667 |
| BTG3         | 0.5211       | 0.348533333  | 0.230933333  | 0.162        |
| LOC651621    | 0.337066667  | 0.1764       | 0.337066667  | 0.025966667  |



|              |              |              |              |              |
|--------------|--------------|--------------|--------------|--------------|
| AK2          | 0.229        | 0.382966667  | 0.310333333  | 0.161166667  |
| MBLAC2       | -0.012833333 | 0.087366667  | 0.118233333  | -0.217666667 |
| TIAF1        | -0.0948      | 0.076266667  | 0.101533333  | -0.379166667 |
| MAD1L1       | 0.042033333  | 0.283        | 0.317333333  | -0.0727      |
| PATL1        | 0.171733333  | -0.084766667 | 0.059066667  | -0.140833333 |
| PGLS         | 0.028133333  | -0.068866667 | -0.0011      | -0.246966667 |
| PCTP         | 0.055766667  | 0.1677       | 0.164766667  | -0.1013      |
| CALML4       | 0.157533333  | 0.152766667  | 0.280766667  | -0.039033333 |
| KIAA1345     | 0.095566667  | 0.158233333  | -0.003333333 | -0.270466667 |
| C1GALT1C1    | 0.1183       | 0.2611       | 0.115266667  | -0.124166667 |
| MYO1B        | 0.4392       | 0.264466667  | -0.031133333 | -0.0153      |
| LOC347544    | 0.221666667  | 0.058766667  | 0.218266667  | -0.045366667 |
| EED          | 0.2898       | 0.522266667  | 0.2857       | -0.048466667 |
| PIK3CD       | 0.218333333  | 0.080066667  | 0.537333333  | 0.013566667  |
| SLC25A36     | 0.185233333  | 0.085766667  | -0.129533333 | -0.331166667 |
| RNF145       | 0.100233333  | 0.057033333  | 0.0914       | -0.3302      |
| CEP57        | -0.128266667 | 0.012366667  | 0.092566667  | -0.316166667 |
| LOC400986    | 0.0179       | 0.167966667  | 0.255766667  | -0.317133333 |
| AKT1         | 0.159666667  | 0.196733333  | 0.243666667  | -0.147033333 |
| PCYOX1       | -0.2211      | 0.1909       | -0.050066667 | -0.483533333 |
| MGC42630     | 0.1194       | -0.0622      | -0.020666667 | -0.340366667 |
| SDHAF1       | 0.076566667  | 0.082733333  | -0.053133333 | -0.2453      |
| AHCYL2       | -0.100833333 | -0.001966667 | 0.1561       | -0.261833333 |
| ANGEL1       | 0.067133333  | 0.105433333  | 0.1552       | -0.193333333 |
| TMEM77       | 0.030733333  | 0.081433333  | 0.116633333  | -0.163133333 |
| MLST8        | -0.046533333 | 0.037566667  | -0.002566667 | -0.208733333 |
| TOPBP1       | 0.283566667  | 0.280433333  | 0.3383       | -0.101566667 |
| INTS10       | -0.007666667 | -0.0528      | 0.006833333  | -0.3887      |
| CCNG1        | -0.058133333 | -0.1344      | 0.306033333  | -0.146566667 |
| TMEM48       | 0.2469       | 0.335533333  | 0.2862       | 0.0738       |
| CENPE        | 0.405233333  | 0.3307       | 0.235566667  | 0.065266667  |
| LOC286512    | -0.285       | -0.0043      | 0.2494       | -0.423766667 |
| HELLS        | 0.210633333  | 0.261466667  | 0.368        | -0.034733333 |
| RCL1         | 0.142033333  | 0.2296       | 0.2656       | -0.098       |
| SMARCAD1     | 0.165566667  | 0.0913       | 0.2496       | -0.2043      |
| DPY19L4      | 0.1155       | 0.052066667  | 0.217933333  | -0.126466667 |
| WDR67        | 0.091533333  | 0.294166667  | 0.284733333  | -0.158166667 |
| LOC100133312 | -0.023333333 | -0.1366      | 0.1051       | -0.400966667 |
| ANKRD39      | 0.3793       | 0.207533333  | 0.202966667  | 0.040433333  |
| THNSL1       | -0.161633333 | 0.0599       | 0.143866667  | -0.257533333 |
| LOC442454    | -0.035533333 | 0.0689       | 0.143533333  | -0.308333333 |
| UQCRB        | 0.092933333  | 0.1171       | 0.178233333  | -0.141966667 |
| LOC647474    | 0.3035       | 0.065066667  | 0.242733333  | -0.131566667 |
| NFATC1       | 0.155433333  | 0.230833333  | 0.3467       | -0.0458      |
| HSPD1        | 0.4462       | 0.2798       | 0.304566667  | -0.064033333 |
| HSD17B7P2    | 0.2147       | 0.276933333  | 0.251533333  | -0.1136      |
| LOC100132289 | 0.1508       | 0.043733333  | 0.0794       | -0.2921      |

|              |              |              |              |              |
|--------------|--------------|--------------|--------------|--------------|
| SPATA2L      | 0.2998       | 0.131933333  | 0.1159       | -0.050633333 |
| TRAPPC9      | -0.037633333 | 0.038233333  | 0.1593       | -0.2658      |
| MEMO1        | 0.478366667  | 0.293266667  | 0.192166667  | 0.044833333  |
| ACTR5        | 0.2829       | 0.297066667  | 0.160533333  | -0.0255      |
| MGC3196      | -0.001433333 | 0.104133333  | 0.139        | -0.125866667 |
| NDUFA1       | 0.0652       | 0.0503       | 0.1572       | -0.316033333 |
| FOXO4        | -0.344233333 | -0.248833333 | 0.024966667  | -0.597433333 |
| SELO         | 0.0494       | 0.103966667  | 0.1216       | -0.151066667 |
| KIAA0114     | -0.01        | 0.189566667  | 0.251733333  | -0.207966667 |
| TMEM60       | 0.001366667  | -0.001666667 | 0.074066667  | -0.1161      |
| FAM60A       | 0.446033333  | 0.2467       | 0.377466667  | 0.0009       |
| C1QTNF1      | 0.128633333  | 0.220833333  | 0.217533333  | -0.140566667 |
| PKN2         | 0.041033333  | 0.217433333  | 0.022466667  | -0.3234      |
| ING5         | 0.172933333  | 0.330466667  | 0.2751       | -0.036466667 |
| LPP          | 0.033133333  | 0.143733333  | 0.0538       | -0.311866667 |
| LOC730432    | 0.1603       | 0.109066667  | 0.1905       | -0.049366667 |
| WRNIP1       | 0.234433333  | 0.264866667  | 0.203633333  | -0.048466667 |
| COMMD2       | 0.403566667  | 0.2348       | 0.244833333  | 0.073633333  |
| EXOC5        | 0.1224       | 0.170266667  | 0.134566667  | -0.144766667 |
| CLTA         | 0.209066667  | 0.151833333  | 0.138133333  | -0.025066667 |
| BAIAP2L1     | 0.315266667  | 0.063766667  | 0.1694       | -0.107566667 |
| ZFYVE26      | -0.100233333 | -0.161866667 | 0.1778       | -0.172033333 |
| NXF1         | 0.23         | 0.262233333  | 0.090033333  | -0.059133333 |
| C16orf75     | 0.095833333  | 0.2495       | 0.383033333  | -0.162366667 |
| FBXO28       | 0.452133333  | 0.239466667  | 0.289333333  | 0.072466667  |
| ESYT1        | 0.447466667  | 0.270833333  | 0.081066667  | 0.0138       |
| ADCK1        | -0.027       | 0.166366667  | 0.103333333  | -0.212333333 |
| KBTBD3       | 0.074        | 0.114033333  | 0.362766667  | -0.138833333 |
| MID1IP1      | -0.018966667 | -0.034033333 | -0.0663      | -0.35        |
| TMED10       | -0.019266667 | 0.081933333  | 0.0776       | -0.3878      |
| SFRS1        | 0.453633333  | 0.4692       | 0.2037       | 0.019933333  |
| LOC401010    | 0.4654       | 0.3072       | 0.081933333  | -0.0675      |
| LOC730074    | 0.008866667  | 0.1999       | 0.1397       | -0.187966667 |
| COMMD1       | -0.055366667 | 0.1647       | 0.263033333  | -0.132733333 |
| KLHL24       | -0.285133333 | -0.5561      | -0.186266667 | -0.586833333 |
| TMEM106C     | 0.2313       | 0.2631       | 0.151833333  | -0.0271      |
| KIAA0831     | -0.065733333 | -0.1319      | -0.045       | -0.3389      |
| KCTD5        | 0.649533333  | 0.602633333  | 0.546066667  | 0.405966667  |
| MDC1         | 0.352533333  | 0.28         | 0.254966667  | -0.0849      |
| SMC6         | 0.021066667  | 0.0803       | 0.3486       | -0.154166667 |
| ADORA1       | 0.308566667  | 0.138066667  | 0.2355       | -0.057533333 |
| PPAP2C       | 0.086766667  | 0.159366667  | 0.325033333  | -0.170666667 |
| AARS2        | 0.0402       | 0.336433333  | 0.4145       | -0.090366667 |
| ZNF7         | 0.0831       | 0.0107       | 0.033        | -0.136566667 |
| LOC100008588 | 0.4551       | 0.4008       | -0.245       | -0.223633333 |
| ECGF1        | -0.0177      | 0.047133333  | -0.0534      | -0.0903      |
| C15orf42     | 0.2763       | 0.404666667  | 0.273066667  | 0.061466667  |

|           |              |              |              |              |
|-----------|--------------|--------------|--------------|--------------|
| EPS15     | -0.066033333 | 0.0569       | 0.2308       | -0.3834      |
| DHRS4L2   | -0.077266667 | 0.073566667  | 0.123333333  | -0.269833333 |
| SCLY      | 0.0901       | 0.058933333  | 0.177733333  | -0.248966667 |
| DNAJC13   | -0.019233333 | 0.008133333  | 0.058066667  | -0.2776      |
| TMEM191B  | 0.138        | 0.1192       | 0.138633333  | -0.186933333 |
| CPNE8     | 0.104533333  | 0.223833333  | 0.361966667  | -0.041433333 |
| C9orf123  | 0.124033333  | 0.129566667  | 0.095        | -0.1991      |
| HOKK2     | -0.017166667 | 0.115933333  | 0.1263       | -0.289966667 |
| RTN4IP1   | 0.376466667  | 0.257133333  | 0.138533333  | -0.117366667 |
| C1orf163  | 0.341466667  | 0.4163       | 0.289333333  | 0.034        |
| ZNF394    | 0.158133333  | 0.319233333  | 0.5003       | 0.0676       |
| DYRK1A    | 0.312233333  | 0.005566667  | 0.107566667  | -0.048666667 |
| KIAA0528  | -0.0054      | -0.116933333 | 0.147266667  | -0.2119      |
| FAM27A    | 0.131966667  | 0.2055       | 0.238733333  | -0.148733333 |
| LPCAT1    | 0.1819       | 0.019966667  | 0.187833333  | 0.075366667  |
| LOC442064 | -0.0186      | 0.110166667  | 0.1843       | -0.3966      |
| AGPAT2    | 0.071866667  | 0.103766667  | 0.145966667  | -0.1535      |
| C17orf63  | 0.346033333  | 0.1618       | 0.3975       | 0.006333333  |
| SH3PXD2B  | 0.1828       | 0.153166667  | 0.133066667  | -0.138066667 |
| CUL5      | 0.2141       | -0.080066667 | 0.121533333  | -0.2497      |
| KLHDC2    | -0.106366667 | -0.159633333 | 0.0672       | -0.326466667 |
| OTUD6B    | 0.3912       | 0.4453       | 0.3434       | 0.048833333  |
| LOC728467 | -0.095866667 | 0.132133333  | 0.118166667  | -0.3581      |
| LOC644422 | 0.4093       | 0.265433333  | 0.255333333  | -0.024133333 |
| KIF20A    | 0.3467       | 0.2262       | 0.085833333  | -0.077333333 |
| ISOC2     | 0.016733333  | 0.2077       | 0.242633333  | -0.132266667 |
| LDHC      | 0.155666667  | 0.142766667  | 0.248066667  | -0.190266667 |
| PRPF19    | 0.289933333  | 0.179833333  | 0.260566667  | 0.045766667  |
| NADSYN1   | 0.0343       | 0.077433333  | 0.020333333  | -0.275033333 |
| CHFR      | 0.0787       | 0.087933333  | 0.190066667  | -0.118433333 |
| NUP205    | 0.2719       | 0.310866667  | 0.2561       | 0.0157       |
| GNB4      | 0.127533333  | 0.3348       | 0.211666667  | -0.227866667 |
| CLIC4     | -0.109833333 | -0.0478      | -0.234233333 | -0.547533333 |
| CDCA8     | 0.6027       | 0.264966667  | 0.181133333  | 0.0736       |
| TMEM165   | 0.471866667  | 0.348633333  | 0.2962       | 0.2653       |
| DVL2      | -0.063433333 | 0.043566667  | 0.0111       | -0.1561      |
| KIAA0562  | -0.023366667 | 0.215633333  | -0.020533333 | -0.322966667 |
| FGD1      | -0.0083      | 0.0999       | 0.157433333  | -0.277333333 |
| ECSIT     | 0.1382       | 0.032666667  | 0.146933333  | -0.1286      |
| PAPSS1    | 0.000966667  | 0.096333333  | -0.085       | -0.544       |
| PRDX5     | -0.168033333 | 0.027166667  | -0.080233333 | -0.453666667 |
| SAFB      | 0.2958       | 0.168466667  | 0.3713       | 0.001166667  |
| SLC25A43  | 0.151033333  | 0.0969       | 0.147933333  | -0.230866667 |
| MRPL13    | 0.153233333  | 0.2536       | 0.2479       | -0.113666667 |
| ZNF317    | 0.178933333  | 0.1131       | 0.265333333  | -0.0647      |
| KIAA1467  | 0.213166667  | 0.1723       | 0.2399       | -0.0517      |
| TASP1     | 0.203633333  | 0.126333333  | 0.173233333  | -0.165533333 |

|              |              |              |              |              |
|--------------|--------------|--------------|--------------|--------------|
| LOC389386    | 0.2051       | 0.0966       | 0.021533333  | -0.072533333 |
| DCAF15       | 0.3754       | 0.299166667  | 0.213        | 0.0431       |
| NDUFB7       | 0.160166667  | -0.078566667 | -0.003733333 | -0.243633333 |
| TAF4B        | -0.070433333 | 0.143866667  | 0.129766667  | -0.164733333 |
| WASL         | 0.2132       | 0.0584       | 0.142466667  | -0.259833333 |
| ULK3         | 0.1628       | 0.220966667  | 0.244433333  | -0.0635      |
| ALG9         | 0.173633333  | 0.205366667  | 0.124966667  | -0.144166667 |
| TFAP4        | 0.2271       | 0.293066667  | 0.1284       | -0.079666667 |
| SVIL         | 0.259066667  | 0.3367       | -0.068966667 | -0.0833      |
| DENND2C      | 0.264433333  | 0.007466667  | 0.234333333  | -0.009533333 |
| ZNF69        | 0.055233333  | 0.097966667  | 0.1538       | -0.221833333 |
| PABPC3       | -0.0085      | -0.0083      | 0.146433333  | -0.1547      |
| KRI1         | 0.364266667  | 0.235366667  | 0.392333333  | 0.094766667  |
| SPRYD4       | 0.000733333  | 0.135866667  | 0.128666667  | -0.304433333 |
| LOC285053    | 0.208266667  | 0.079666667  | 0.253133333  | -0.143133333 |
| PCBP1        | 0.245633333  | 0.2679       | 0.253266667  | -0.108333333 |
| LOC100129681 | 0.1791       | 0.139066667  | 0.127566667  | -0.312733333 |
| C12orf32     | 0.098533333  | 0.236533333  | 0.2015       | 0.0416       |
| PQBP1        | 0.195333333  | 0.087033333  | 0.0805       | -0.1255      |
| NFKBIB       | 0.324633333  | 0.192166667  | 0.2165       | -0.033266667 |
| NAGLU        | -0.081466667 | -0.232933333 | 0.124833333  | -0.405066667 |
| WDR72        | 0.2448       | 0.248333333  | 0.070466667  | -0.125333333 |
| HDHD3        | -0.033233333 | -0.005266667 | 0.155833333  | -0.2287      |
| LOC647958    | 0.090533333  | 0.0585       | 0.013866667  | -0.238366667 |
| FAM54A       | 0.451433333  | 0.2658       | 0.212666667  | 0.062133333  |
| SCIN         | 0.036233333  | 0.051566667  | -0.039633333 | -0.239666667 |
| ZBTB44       | 0.112566667  | 0.0974       | 0.003533333  | -0.139266667 |
| CENTG3       | 0.2552       | 0.1789       | 0.1101       | -0.1001      |
| WDR8         | 0.160366667  | 0.247266667  | 0.216966667  | -0.1713      |
| C7orf30      | 0.3813       | 0.216966667  | 0.125933333  | -0.002033333 |
| SMARCA2      | -0.1412      | 0.041033333  | 0.0139       | -0.428666667 |
| SEMA3E       | 0.260366667  | 0.4501       | 0.400166667  | -0.0145      |
| ZNF326       | 0.321266667  | 0.2907       | 0.371166667  | -0.004933333 |
| CD83         | 0.240933333  | 0.222433333  | 0.3619       | -0.005233333 |
| RAB30        | 0.305633333  | 0.314566667  | 0.2988       | 0.045166667  |
| STK32B       | 0.193633333  | 0.263133333  | 0.0195       | -0.0823      |
| CUTL1        | 0.0639       | 0.1055       | -0.019666667 | -0.357333333 |
| SPRY4        | 0.8048       | 0.877266667  | 1.0948       | 0.7206       |
| LOC642357    | 0.199566667  | -0.004066667 | 0.132733333  | -0.2502      |
| PLEKHM2      | -0.194933333 | 0.047566667  | 0.154033333  | -0.398933333 |
| RNF214       | 0.069066667  | 0.039666667  | 0.1022       | -0.350233333 |
| C11orf2      | -0.032       | 0.039666667  | 0.1429       | -0.242266667 |
| SNX19        | 0.08         | 0.1532       | 0.106766667  | -0.187566667 |
| PPP1R2       | 0.071233333  | -0.0321      | 0.1667       | -0.201233333 |
| MRPL48       | 0.2801       | 0.246166667  | 0.0598       | -0.133833333 |
| SNAP29       | 0.0271       | 0.207        | 0.213433333  | -0.1106      |
| MRPL15       | 0.216566667  | 0.204466667  | 0.222466667  | 0.0291       |

|              |              |              |              |              |
|--------------|--------------|--------------|--------------|--------------|
| PRAGMIN      | 0.456633333  | 0.135933333  | 0.2452       | -0.020966667 |
| NFIA         | 0.022033333  | 0.132566667  | 0.320033333  | -0.343033333 |
| RALGAPA1     | 0.017166667  | 0.0776       | 0.249433333  | -0.2272      |
| LOC100128007 | 0.27         | 0.2992       | 0.278033333  | -0.073033333 |
| UNC84B       | 0.103633333  | 0.2082       | 0.222766667  | -0.165466667 |
| LOC100133099 | 0.300666667  | 0.2307       | 0.327566667  | -0.081666667 |
| CISD2        | 0.2655       | 0.190833333  | 0.160033333  | -0.0113      |
| ZNF174       | 0.3045       | 0.162133333  | 0.254766667  | 0.046833333  |
| SPRED1       | 0.677733333  | 0.496333333  | 0.5448       | 0.2422       |
| MRPL11       | 0.222333333  | 0.166133333  | 0.264166667  | -0.046433333 |
| SF3B2        | 0.343033333  | 0.251733333  | 0.192133333  | 0.016766667  |
| ZW10         | 0.3783       | 0.371566667  | 0.216233333  | 0.051666667  |
| ZFPL1        | 0.2256       | 0.0773       | -0.022266667 | -0.117933333 |
| LOC650515    | 0.192433333  | 0.286733333  | 0.1405       | -0.088933333 |
| YIPF6        | 0.114066667  | 0.148        | 0.0353       | -0.2812      |
| TMEM218      | -0.087033333 | 0.055666667  | 0.223933333  | -0.316833333 |
| RPS29        | -0.325666667 | -0.064966667 | 0.3306       | -0.4315      |
| LOC645332    | 0.186        | 0.424633333  | 0.398        | 0.0853       |
| CACHD1       | 0.182466667  | 0.126466667  | 0.096366667  | -0.135366667 |
| SFMBT1       | 0.3067       | 0.286066667  | 0.258433333  | -0.113666667 |
| C15orf54     | 0.7408       | 0.543266667  | 0.053666667  | 0.1436       |
| GHDC         | 0.004933333  | -0.035066667 | -0.034866667 | -0.358933333 |
| MIF          | 0.295566667  | 0.223866667  | 0.2326       | -0.064066667 |
| B3GALNT1     | 0.0401       | 0.264966667  | 0.210833333  | -0.184566667 |
| HADHA        | 0.048833333  | -0.006066667 | 0.271733333  | -0.264166667 |
| ASF1A        | 0.038233333  | 0.0916       | -0.0029      | -0.2509      |
| LAMA4        | 0.0064       | 0.1095       | 0.3779       | -0.1453      |
| SNX5         | 0.4698       | 0.186233333  | 0.404866667  | -0.006733333 |
| FBXO33       | 0.093533333  | 0.045233333  | 0.318833333  | -0.083066667 |
| RBM12B       | 0.193333333  | 0.3938       | 0.3292       | -0.1564      |
| CDCA1        | 0.413433333  | 0.323966667  | 0.249266667  | -0.046133333 |
| COP5         | 0.329333333  | 0.1454       | 0.024733333  | -0.1951      |
| LYSMD4       | 0.148433333  | 0.0146       | 0.155066667  | -0.063133333 |
| FAM111A      | 0.1634       | 0.3398       | 0.311833333  | -0.040166667 |
| DCTN1        | 0.203866667  | 0.0129       | 0.177033333  | -0.1398      |
| LOC648758    | 0.2688       | 0.293333333  | 0.3132       | 0.022233333  |
| ROR1         | 0.196233333  | 0.097433333  | 0.045666667  | -0.0857      |
| ATF2         | 0.1876       | 0.205766667  | 0.318        | -0.074466667 |
| PUSL1        | 0.271666667  | 0.174933333  | 0.206766667  | -0.106433333 |
| LOC649169    | 0.2569       | 0.3385       | 0.214466667  | -0.075333333 |
| YIPF4        | 0.0991       | 0.106533333  | 0.069333333  | -0.264366667 |
| TNRC15       | 0.062        | 0.167833333  | 0.141233333  | -0.132966667 |
| KCTD3        | 0.399066667  | 0.2598       | 0.225033333  | 0.0527       |
| NSMAF        | -0.148333333 | -0.153966667 | 0.0932       | -0.3111      |
| ZBED4        | 0.403466667  | 0.275166667  | 0.2494       | 0.115933333  |
| VPS28        | 0.043866667  | 0.101633333  | 0.200833333  | -0.132566667 |
| LOC728873    | 0.3644       | 0.303266667  | 0.258566667  | -0.012433333 |

|              |              |              |             |              |
|--------------|--------------|--------------|-------------|--------------|
| GLT25D1      | 0.1679       | 0.262766667  | 0.0032      | -0.247733333 |
| TMED1        | -0.069266667 | 0.068366667  | 0.0665      | -0.422066667 |
| TRIM36       | 0.174733333  | 0.3035       | 0.359433333 | -0.010266667 |
| CLCN3        | -0.2076      | -0.019666667 | 0.109       | -0.3647      |
| LOC100128410 | 0.0395       | -0.026266667 | 0.035266667 | -0.3615      |
| CRTC1        | 0.105633333  | 0.106466667  | 0.167166667 | -0.2655      |
| CLPP         | 0.121733333  | 0.198266667  | 0.177133333 | -0.112666667 |
| CD2          | 0.01         | 0.127866667  | 0.169466667 | -0.127866667 |
| AASS         | 0.1654       | 0.101266667  | 0.320066667 | -0.0333      |
| LOC731049    | 0.460866667  | 0.493533333  | 0.2112      | -0.010333333 |
| COQ3         | 0.295933333  | 0.382        | 0.345366667 | -0.029733333 |
| CPT2         | -0.0332      | 0.0057       | 0.2002      | -0.208766667 |
| PTRH2        | 0.1575       | 0.355133333  | 0.2959      | -0.036566667 |
| LRPPRC       | 0.041633333  | 0.068966667  | 0.149       | -0.2273      |
| ARMC10       | 0.196666667  | 0.2292       | 0.213166667 | -0.107066667 |
| ZFH3         | 0.263766667  | 0.130766667  | 0.024933333 | -0.238       |
| PTPRA        | -0.0465      | 0.019533333  | 0.124966667 | -0.196566667 |
| ATP11C       | 0.160766667  | 0.2941       | 0.1788      | -0.098233333 |
| SSH1         | 0.023833333  | 0.498666667  | 0.387       | -0.0296      |
| LOC100134273 | 0.024633333  | 0.1001       | 0.0522      | -0.347566667 |
| KCTD21       | 0.107066667  | 0.176166667  | 0.1803      | -0.055233333 |
| MPV17L2      | 0.1898       | 0.256466667  | 0.2823      | 0.084066667  |
| CHMP2A       | 0.236266667  | -0.1459      | 0.292833333 | -0.249933333 |
| NCAPG        | 0.406966667  | 0.253933333  | 0.263133333 | 0.0138       |
| LOC643233    | 0.353066667  | 0.283633333  | 0.260533333 | -0.068566667 |
| HSZFP36      | 0.1517       | -0.025666667 | 0.317466667 | -0.075633333 |
| ACSM3        | 0.004366667  | 0.134066667  | 0.061233333 | -0.330433333 |
| SHRM         | 0.5058       | 0.452733333  | 0.3823      | 0.263266667  |
| PSRC1        | 0.4514       | 0.150866667  | 0.232633333 | 0.018566667  |
| LOC650024    | 0.2157       | 0.272933333  | 0.2211      | -0.067733333 |
| TRAP1        | 0.1076       | 0.2655       | 0.2363      | -0.129033333 |
| PPP2R3C      | 0.080866667  | 0.118233333  | 0.243433333 | -0.239733333 |
| TAF2         | 0.225566667  | 0.1894       | 0.1834      | -0.143133333 |
| ATP13A1      | 0.1168       | 0.0218       | 0.0999      | -0.259533333 |
| HSPBL2       | 0.240166667  | -0.027633333 | -0.0497     | -0.141366667 |
| OTUB1        | 0.303766667  | 0.2057       | 0.008933333 | -0.041866667 |
| TRMU         | 0.3715       | 0.4284       | 0.2091      | 0.009466667  |
| FGFR10P      | 0.322        | 0.2861       | 0.163433333 | -0.015166667 |
| LOC203547    | 0.2835       | 0.344766667  | 0.360466667 | -0.067366667 |
| LOC100132728 | 0.102466667  | 0.532666667  | 0.023966667 | -0.2884      |
| RDH11        | 0.009733333  | 0.083766667  | 0.292866667 | -0.036766667 |
| GDPD1        | -0.128166667 | 0.4729       | 0.364466667 | -0.258666667 |
| MED15        | 0.2004       | 0.246233333  | 0.177633333 | -0.082766667 |
| CCDC112      | 0.143366667  | 0.284833333  | 0.2509      | -0.117766667 |
| NUP93        | 0.048        | 0.0768       | 0.162766667 | -0.292466667 |
| ADAT3        | 0.273        | 0.153433333  | 0.3023      | -0.030933333 |
| DNAH14       | 0.283233333  | 0.312566667  | 0.303866667 | 0.0059       |

|           |              |              |              |              |
|-----------|--------------|--------------|--------------|--------------|
| RNF115    | -0.017733333 | 0.0474       | 0.070133333  | -0.177333333 |
| NDUFB10   | 0.063533333  | 0.0883       | 0.1057       | -0.2648      |
| SEC31A    | 0.153633333  | 0.298966667  | -0.091166667 | -0.297733333 |
| METTL13   | 0.325533333  | 0.4345       | 0.384366667  | 0.021466667  |
| LSM7      | 0.219033333  | 0.281966667  | 0.229866667  | -0.0932      |
| CLN3      | 0.047266667  | 0.002033333  | 0.126066667  | -0.2757      |
| CCDC115   | -0.0203      | -0.2351      | 0.0031       | -0.406766667 |
| GAGE8     | 0.143666667  | 0.178733333  | 0.254766667  | -0.131433333 |
| FAM195A   | 0.192866667  | 0.213        | 0.222        | -0.175633333 |
| ATP5F1    | 0.1298       | 0.216866667  | 0.2364       | -0.1599      |
| CDKN1B    | -0.196866667 | -0.148766667 | -0.038166667 | -0.462       |
| C9orf140  | 0.3483       | 0.3249       | 0.1433       | 0.037866667  |
| POMGNT1   | 0.1179       | 0.258533333  | 0.338266667  | -0.117666667 |
| OSBPL1A   | -0.220433333 | -0.021866667 | 0.173266667  | -0.507666667 |
| AMMECR1   | 0.368866667  | 0.3884       | 0.2559       | 0.1768       |
| LOC646531 | 0.2781       | 0.256833333  | 0.1347       | -0.053366667 |
| ZNF364    | 0.05         | 0.022733333  | 0.053266667  | -0.213033333 |
| PRKD3     | 0.0706       | 0.2113       | 0.289533333  | -0.2745      |
| UBTD2     | 0.059566667  | 0.2975       | 0.300233333  | -0.088433333 |
| CTSD      | -0.096233333 | -0.119666667 | 0.1667       | -0.372866667 |
| FUT4      | 0.508533333  | 0.244766667  | 0.2781       | 0.032166667  |
| RHBDF2    | 0.121266667  | 0.2586       | 0.404533333  | -0.038433333 |
| LOC729769 | 0.144866667  | 0.1619       | 0.1508       | -0.0799      |
| SP8       | 0.519466667  | 0.1442       | 0.065033333  | -0.081066667 |
| WDSUB1    | -0.198266667 | -0.203066667 | 0.1819       | -0.396166667 |
| KPTN      | 0.144366667  | 0.098966667  | 0.261966667  | -0.136433333 |
| ATP10A    | 0.417333333  | 0.115        | 0.304833333  | -0.034233333 |
| EPS15L1   | 0.234166667  | 0.317233333  | 0.356166667  | -0.046566667 |
| PHOSPHO2  | 0.145633333  | 0.119566667  | 0.2473       | -0.179966667 |
| C11orf48  | 0.4176       | 0.5218       | 0.314233333  | 0.087666667  |
| SMG5      | 0.257433333  | 0.1546       | 0.3842       | 0.0403       |
| CLP1      | 0.3778       | 0.303166667  | 0.250166667  | 0.027166667  |
| SGCE      | 0.214133333  | 0.135233333  | 0.058533333  | -0.249133333 |
| PIK4CA    | 0.001266667  | -0.0253      | 0.220033333  | -0.2444      |
| TSPYL2    | 0.188633333  | 0.113133333  | 0.146666667  | -0.146966667 |
| BUB1      | 0.547733333  | 0.3458       | 0.176366667  | 0.173666667  |
| PTTG3P    | 0.1783       | 0.331333333  | 0.4762       | -0.012833333 |
| KIAA1012  | 0.216233333  | 0.187066667  | 0.163866667  | -0.125933333 |
| EFR3A     | 0.191566667  | 0.0221       | 0.068266667  | -0.0843      |
| LOC205251 | 0.302133333  | 0.1344       | 0.298633333  | -0.062       |
| ALKBH8    | 0.314533333  | 0.453333333  | 0.2852       | -0.029166667 |
| DEPDC1B   | 0.361466667  | 0.418233333  | 0.214        | 0.0175       |
| SCML2     | 0.2284       | 0.314366667  | 0.337966667  | -0.094466667 |
| PIK3R1    | -0.111066667 | 0.026766667  | 0.319066667  | -0.304133333 |
| ATIC      | 0.134433333  | 0.300266667  | 0.351133333  | -0.087433333 |
| C8orf30B  | 0.3669       | 0.241066667  | 0.1682       | 0.012733333  |
| SLC39A4   | 0.224366667  | 0.1066       | 0.169266667  | -0.2381      |

|              |              |              |              |              |
|--------------|--------------|--------------|--------------|--------------|
| CCNE1        | 0.386        | 0.6476       | 0.523233333  | 0.1018       |
| CSPP1        | 0.245433333  | 0.091933333  | 0.176166667  | -0.139166667 |
| OTUD4        | 0.4224       | 0.312633333  | 0.281933333  | -0.0328      |
| LXN          | -0.448766667 | -0.005633333 | 0.496033333  | -0.5086      |
| ZNF280C      | 0.1314       | 0.416866667  | 0.2846       | 0.0035       |
| KDM4D        | 0.1224       | 0.1785       | 0.108166667  | -0.198366667 |
| STBD1        | 0.433733333  | 0.111866667  | 0.340333333  | 0.116066667  |
| U2AF2        | 0.3404       | 0.268533333  | 0.242433333  | 0.0147       |
| LOC730995    | 0.051066667  | 0.1464       | 0.3993       | -0.236833333 |
| KATNA1       | 0.2597       | 0.261033333  | 0.1472       | -0.074333333 |
| NAT10        | 0.338433333  | 0.437133333  | 0.330966667  | 0.009433333  |
| BPTF         | -0.020366667 | 0.2367       | 0.2048       | -0.3485      |
| TTC9C        | 0.230466667  | 0.119633333  | 0.150733333  | -0.106966667 |
| ANKRD13C     | 0.4248       | 0.2695       | 0.088133333  | 0.069233333  |
| KRAS         | 0.3351       | 0.216033333  | 0.129433333  | -0.145766667 |
| LOC100133923 | 0.040233333  | 0.403533333  | 0.414866667  | -0.191633333 |
| ALG13        | 0.538        | 0.4028       | 0.351366667  | 0.142533333  |
| NHLRC2       | 0.336866667  | 0.362933333  | 0.293233333  | 0.070333333  |
| TTC35        | 0.0416       | 0.169133333  | 0.047733333  | -0.227233333 |
| C20orf194    | 0.149166667  | 0.197566667  | 0.181433333  | -0.129933333 |
| BHLHB2       | 0.3777       | 0.149        | 0.752866667  | 0.279866667  |
| ITFG3        | -0.241833333 | 0.0682       | 0.029766667  | -0.427133333 |
| ZNF329       | 0.2432       | 0.129666667  | 0.076466667  | -0.206266667 |
| LSM4         | 0.309333333  | 0.208533333  | 0.298866667  | -0.103433333 |
| MANSC1       | 0.2295       | 0.530633333  | 0.558666667  | 0.157433333  |
| LOC149448    | 0.2121       | 0.1537       | 0.2865       | -0.111433333 |
| DGCR6        | -0.309766667 | -0.036333333 | -0.153233333 | -0.512733333 |
| ASF1B        | 0.16         | 0.426733333  | 0.3385       | 0.114966667  |
| DFFB         | 0.273666667  | 0.266866667  | 0.244566667  | -0.106966667 |
| SLMO1        | 0.0553       | 0.042633333  | -0.2025      | -0.303766667 |
| EXO1         | 0.195        | 0.3149       | 0.3017       | -0.079866667 |
| ATAD3B       | 0.640766667  | 0.2444       | 0.114666667  | 0.021966667  |
| LOC643287    | 0.2417       | 0.411166667  | 0.204466667  | -0.148833333 |
| TBRG4        | 0.2952       | 0.462833333  | 0.448733333  | 0.028733333  |
| LOC641746    | 0.256066667  | 0.348666667  | 0.090666667  | -0.244666667 |
| LOC729764    | -0.041966667 | 0.0713       | 0.182066667  | -0.364433333 |
| SAC3D1       | 0.389333333  | 0.442266667  | 0.153466667  | 0.104133333  |
| 5-Sep        | -0.133533333 | 0.061466667  | 0.095266667  | -0.524433333 |
| DIP2A        | 0.2539       | 0.226433333  | 0.330666667  | -0.082166667 |
| ZNF626       | 0.202033333  | 0.078166667  | 0.137366667  | -0.345       |
| RRN3         | 0.3157       | 0.398133333  | 0.2794       | 0.021533333  |
| A2LD1        | -0.034266667 | 0.038166667  | 0.079833333  | -0.401966667 |
| EVI2A        | 0.055133333  | 0.159466667  | 0.225833333  | -0.1654      |
| TMEM184B     | 0.364466667  | 0.137433333  | 0.0835       | -0.1702      |
| P76          | -0.014666667 | -0.050033333 | -0.098966667 | -0.3168      |
| PARP2        | 0.270166667  | 0.3958       | 0.165033333  | -0.061333333 |
| KIAA0196     | -0.136866667 | -0.045333333 | 0.082966667  | -0.351866667 |



|              |              |              |              |              |
|--------------|--------------|--------------|--------------|--------------|
| MGC12982     | 0.312666667  | 0.230366667  | 0.200933333  | -0.148333333 |
| LOC645515    | 0.093633333  | 0.009733333  | 0.143833333  | -0.1984      |
| CHAF1A       | 0.198766667  | 0.3553       | 0.350166667  | 0.040966667  |
| FAM86D       | 0.299866667  | 0.381466667  | 0.4336       | 0.0112       |
| YBX1         | 0.148833333  | 0.4175       | 0.166766667  | -0.029233333 |
| APEX1        | 0.014        | 0.158833333  | 0.198833333  | -0.224933333 |
| LOC654189    | 0.298433333  | 0.111133333  | 0.404366667  | 0.0616       |
| MTHFD1L      | 0.468        | 0.090666667  | -0.196233333 | -0.1151      |
| NAGPA        | -0.164       | -0.045333333 | 0.104866667  | -0.266966667 |
| CELSR2       | 0.111466667  | 0.0448       | 0.097833333  | -0.3255      |
| CTNS         | -0.058833333 | -0.046966667 | 0.0009       | -0.223866667 |
| SDAD1        | 0.1508       | 0.114866667  | 0.298133333  | -0.171166667 |
| MPDZ         | -0.096366667 | 0.2374       | 0.273533333  | -0.2734      |
| PPTC7        | 0.379033333  | 0.325533333  | 0.487833333  | 0.076866667  |
| VRK2         | 0.256633333  | 0.297733333  | 0.271866667  | -0.022033333 |
| RBM15        | 0.405866667  | 0.352        | 0.3244       | 0.072633333  |
| SLC19A1      | 0.154666667  | 0.209266667  | 0.1788       | -0.269133333 |
| SLC37A3      | 0.372566667  | 0.1431       | 0.499933333  | 0.0794       |
| APAF1        | 0.304266667  | 0.174866667  | 0.3154       | -0.0338      |
| BCLAF1       | 0.3342       | 0.0946       | 0.237966667  | -0.135866667 |
| CCDC134      | 0.287133333  | 0.356633333  | 0.359133333  | -0.054266667 |
| RIF1         | 0.318866667  | 0.426033333  | 0.3551       | -0.075633333 |
| C20orf72     | 0.2471       | 0.146533333  | 0.253966667  | -0.096666667 |
| UCHL5IP      | 0.298366667  | 0.424333333  | 0.2261       | -0.0477      |
| MESDC1       | 0.177        | 0.2484       | 0.4286       | 0.110133333  |
| ZC3H7A       | 0.4175       | 0.1591       | 0.1762       | -0.046033333 |
| RNPEP        | 0.1133       | 0.061966667  | 0.182233333  | -0.201766667 |
| HNRNPR       | 0.499433333  | 0.231466667  | 0.340266667  | 0.028133333  |
| PANK4        | 0.2703       | 0.1334       | 0.142766667  | -0.0763      |
| TCEB3        | 0.417566667  | 0.482533333  | 0.523333333  | 0.200033333  |
| PSMG1        | 0.3912       | 0.3359       | 0.337966667  | -0.023833333 |
| BANF1        | 0.3635       | 0.320933333  | 0.2321       | -0.064633333 |
| SSB          | 0.2958       | 0.331566667  | 0.1726       | -0.081366667 |
| XPO7         | 0.191133333  | 0.2603       | 0.275833333  | -0.1311      |
| EPB41L5      | 0.0461       | 0.1324       | 0.213733333  | -0.108333333 |
| LOC648399    | 0.150466667  | 0.169        | 0.207266667  | -0.1039      |
| UFSP2        | 0.012933333  | -0.0235      | 0.099566667  | -0.331933333 |
| SREBF1       | -0.025866667 | -0.209466667 | -0.0266      | -0.5396      |
| GFOD1        | 0.078566667  | 0.112266667  | 0.2566       | -0.034966667 |
| CLASP1       | 0.055966667  | 0.198933333  | -0.035333333 | -0.347066667 |
| LOC644242    | 0.236966667  | 0.3963       | 0.445466667  | -0.150266667 |
| TMEM161A     | 0.0322       | 0.159066667  | 0.1613       | -0.308833333 |
| ACTR3        | 0.257033333  | 0.209866667  | 0.270533333  | -0.0918      |
| LOC100128525 | 0.2195       | 0.4396       | -0.032666667 | -0.172033333 |
| USP37        | 0.104033333  | 0.291866667  | 0.3048       | -0.150366667 |
| C14orf125    | -0.046666667 | 0.2505       | 0.011233333  | -0.351233333 |
| PHF14        | 0.2294       | 0.0853       | 0.2331       | -0.095366667 |

|              |              |              |              |              |
|--------------|--------------|--------------|--------------|--------------|
| TRIM7        | 0.291633333  | 0.167533333  | 0.219866667  | -0.085666667 |
| RNF170       | 0.023266667  | -0.0515      | -0.015366667 | -0.3962      |
| REEP6        | -0.084833333 | -0.0664      | 0.1938       | -0.304533333 |
| ZZZ3         | -0.037466667 | -0.000966667 | 0.0611       | -0.3102      |
| GTF3C6       | 0.307866667  | 0.325333333  | 0.2          | -0.016633333 |
| CPSF2        | -0.0814      | 0.394166667  | 0.346533333  | -0.2154      |
| DPH2         | 0.273133333  | 0.406566667  | 0.211466667  | -0.0176      |
| KREMEN1      | -0.014333333 | 0.237266667  | 0.298166667  | -0.206833333 |
| APOA1BP      | -0.018266667 | 0.074        | 0.1871       | -0.323633333 |
| TXN2         | 0.2984       | 0.124033333  | 0.200833333  | -0.0906      |
| LOC644617    | 0.415366667  | 0.446033333  | 0.300833333  | 0.077133333  |
| ADCK4        | -0.073233333 | 0.005233333  | 0.108733333  | -0.343333333 |
| LMO4         | -0.096133333 | -0.256533333 | -0.200933333 | -0.4689      |
| IPO8         | 0.087833333  | 0.249733333  | 0.237866667  | -0.166266667 |
| MTMR4        | 0.095733333  | 0.011933333  | 0.241666667  | -0.313266667 |
| TLL5         | 0.2072       | 0.170433333  | 0.185766667  | -0.071066667 |
| LOC728635    | 0.089266667  | -0.024266667 | 0.0859       | -0.369433333 |
| EIF2C1       | 0.1583       | 0.044        | 0.11         | -0.350633333 |
| EIF2B5       | 0.247366667  | 0.347733333  | 0.204933333  | -0.021766667 |
| GTPBP6       | 0.072033333  | 0.06         | 0.0968       | -0.199966667 |
| MCM8         | 0.3517       | 0.464        | 0.294633333  | -0.030833333 |
| TGFBRAP1     | 0.289933333  | 0.3862       | 0.136633333  | -0.1807      |
| PTK7         | 0.084866667  | -0.0795      | -0.048533333 | -0.472566667 |
| PLCXD1       | -0.438666667 | -0.086733333 | -0.1642      | -0.799133333 |
| LOC732450    | 0.0945       | 0.337133333  | 0.364733333  | -0.1952      |
| CD59         | 0.284533333  | 0.107433333  | 0.1908       | -0.023533333 |
| C20orf3      | 0.1323       | 0.001133333  | -0.0387      | -0.329533333 |
| CCS          | 0.0457       | 0.047566667  | 0.168966667  | -0.105066667 |
| APBA3        | 0.034433333  | -0.002433333 | 0.0366       | -0.3562      |
| CUEDC1       | -0.004266667 | 0.144033333  | 0.1116       | -0.448266667 |
| HHLA3        | -0.093       | 0.115433333  | 0.1144       | -0.299233333 |
| COX6B1       | 0.281466667  | 0.1136       | 0.111366667  | -0.103966667 |
| LOC100131735 | 0.287166667  | 0.319433333  | 0.2142       | -0.056566667 |
| EIF2B4       | 0.309533333  | 0.353733333  | 0.1161       | -0.101166667 |
| LOC100131721 | -0.002466667 | 0.139866667  | 0.3324       | -0.218966667 |
| LOC729816    | 0.087766667  | 0.4803       | 0.3702       | -0.126833333 |
| SPESP1       | 0.088533333  | 0.134833333  | 0.227733333  | -0.1951      |
| DPP7         | 0.055666667  | -0.1893      | 0.087233333  | -0.331566667 |
| SCCPDH       | 0.039666667  | 0.0776       | 0.158966667  | -0.201066667 |
| CA5B         | 0.152166667  | 0.123533333  | 0.0847       | -0.272633333 |
| TROAP        | 0.405666667  | 0.257066667  | 0.1784       | -0.033033333 |
| LRRC58       | 0.355533333  | 0.186133333  | 0.334033333  | -0.029266667 |
| ZBTB42       | 0.0529       | 0.1207       | 0.054166667  | -0.2044      |
| LOC731751    | 0.2872       | 0.302133333  | 0.313        | -0.152933333 |
| NPHP4        | 0.1111       | 0.213633333  | 0.2431       | -0.059266667 |
| KIAA0251     | 0.289733333  | 0.1648       | 0.156633333  | -0.173933333 |
| PIGF         | 0.0205       | 0.324366667  | 0.217666667  | -0.379866667 |

|           |              |              |              |              |
|-----------|--------------|--------------|--------------|--------------|
| C6orf211  | 0.066866667  | 0.135366667  | 0.424366667  | -0.1911      |
| LOC648509 | 0.2297       | 0.3457       | 0.347533333  | -0.237066667 |
| WRB       | -0.0116      | 0.115266667  | 0.129366667  | -0.392433333 |
| SLC25A11  | 0.159333333  | 0.141266667  | 0.3          | -0.325466667 |
| C20orf117 | 0.416533333  | 0.319133333  | 0.1851       | 0.074666667  |
| ID3       | -0.145033333 | -0.0741      | 0.418266667  | -0.8687      |
| LOC652226 | 0.360966667  | 0.117433333  | 0.208        | -0.116733333 |
| RNMT      | 0.0766       | -0.061133333 | 0.125733333  | -0.180133333 |
| KIDINS220 | 0.047233333  | 0.116733333  | 0.152666667  | -0.241633333 |
| DBP       | -0.096866667 | 0.019133333  | -0.010766667 | -0.5143      |
| ANAPC1    | 0.271033333  | 0.344633333  | 0.307266667  | -0.0667      |
| HMGA2     | 0.5709       | 0.346733333  | 0.2319       | 0.115133333  |
| MMACHC    | 0.237933333  | 0.389133333  | 0.4754       | 0.042566667  |
| SLC39A6   | 0.0761       | 0.018166667  | 0.256966667  | -0.289733333 |
| CENPF     | 0.300566667  | 0.353566667  | 0.2976       | -0.1912      |
| RNF13     | -0.015766667 | -0.0156      | 0.125566667  | -0.331066667 |
| MAK16     | 0.608466667  | 0.5322       | 0.441166667  | 0.080433333  |
| APOO      | 0.225633333  | 0.2644       | 0.339933333  | -0.053366667 |
| COX17     | 0.210933333  | 0.241633333  | 0.3983       | -0.177533333 |
| KLHL13    | 0.120166667  | 0.244        | 0.1417       | -0.249866667 |
| LOC729082 | 0.204233333  | 0.342233333  | 0.407633333  | -0.1437      |
| SPCS2     | 0.249533333  | 0.239333333  | 0.234766667  | -0.146866667 |
| ZMAT3     | -0.047133333 | 0.0657       | 0.520533333  | -0.387166667 |
| SLC11A2   | -0.198       | -0.0494      | 0.1505       | -0.389833333 |
| DEPDC1    | 0.3828       | 0.2426       | 0.183        | -0.067566667 |
| ARL15     | 0.178133333  | 0.2982       | 0.360433333  | -0.011533333 |
| C9orf91   | -0.119166667 | -0.160366667 | 0.0063       | -0.338433333 |
| UBE2J1    | 0.290733333  | 0.192766667  | 0.254266667  | -0.0576      |
| UBE2L3    | 0.581433333  | 0.150533333  | 0.179733333  | 0.210033333  |
| LAGE3     | 0.0919       | -0.039333333 | 0.092733333  | -0.430366667 |
| ARL5A     | 0.2612       | 0.167566667  | 0.187766667  | -0.146566667 |
| COX6C     | 0.2437       | 0.105033333  | 0.198533333  | -0.1928      |
| LOC401218 | 0.151966667  | 0.1056       | 0.127866667  | -0.149966667 |
| DCXR      | 0.068866667  | 0.1351       | 0.216533333  | -0.178966667 |
| C19orf66  | -0.0313      | -0.013933333 | 0.133066667  | -0.2324      |
| PUF60     | 0.293866667  | 0.175966667  | 0.2403       | -0.116333333 |
| DOHH      | 0.350933333  | 0.4041       | 0.384233333  | 0.0652       |
| C22orf30  | 0.198533333  | 0.081466667  | 0.267133333  | -0.182633333 |
| RYK       | 0.3867       | 0.249233333  | 0.4224       | -0.0882      |
| CORO2A    | 0.1966       | 0.283666667  | 0.276766667  | -0.145033333 |
| NOP56     | 0.3415       | 0.590466667  | 0.4298       | 0.068866667  |
| MTERF     | 0.239433333  | 0.245233333  | 0.191166667  | -0.0877      |
| ZNF18     | -0.114066667 | 0.078533333  | 0.0263       | -0.3345      |
| BRI3BP    | 0.572866667  | 0.5726       | 0.310733333  | 0.0796       |
| SEPHS2    | -0.052033333 | -0.101466667 | 0.1937       | -0.3761      |
| HNRNPUL2  | 0.188666667  | 0.131633333  | 0.085233333  | -0.272766667 |
| PIGN      | 0.081366667  | 0.067433333  | 0.1525       | -0.348       |

|              |              |              |             |              |
|--------------|--------------|--------------|-------------|--------------|
| ZDHC5        | 0.2663       | 0.1977       | 0.246466667 | -0.177066667 |
| C12orf45     | 0.320366667  | 0.2601       | 0.241133333 | -0.014733333 |
| LOC729375    | 0.3815       | 0.4001       | 0.506466667 | 0.104233333  |
| GRINA        | -0.052       | -0.017433333 | 0.283533333 | -0.364066667 |
| ERICH1       | 0.468833333  | 0.3516       | 0.377366667 | 0.074866667  |
| RHEBL1       | 0.3713       | 0.216166667  | 0.4338      | 0.099033333  |
| CART1        | -0.0864      | 0.0789       | 0.253166667 | -0.111833333 |
| LOC100132247 | 0.001233333  | -0.022566667 | 0.137533333 | -0.4005      |
| NMB          | 0.239633333  | 0.2175       | 0.386433333 | -0.093866667 |
| SASS6        | 0.389166667  | 0.2604       | 0.385133333 | -0.092733333 |
| ACCN2        | -0.0331      | 0.109066667  | 0.156433333 | -0.287666667 |
| BRWD3        | 0.100533333  | 0.236066667  | 0.204766667 | -0.162666667 |
| SBNO1        | 0.2898       | 0.293766667  | 0.2885      | -0.087166667 |
| LYL1         | 0.348833333  | 0.0913       | 0.063466667 | -0.206533333 |
| RBX1         | 0.313866667  | 0.4231       | 0.204366667 | -0.063366667 |
| LOC648605    | 0.328466667  | 0.1931       | 0.409433333 | -0.076033333 |
| CPSF3        | 0.2743       | 0.3828       | 0.261       | -0.1239      |
| ASCC2        | 0.170733333  | 0.278833333  | 0.139633333 | -0.151566667 |
| RAB8A        | 0.4578       | 0.3643       | 0.2355      | -0.0852      |
| CYP51A1      | -0.0126      | 0.2178       | 0.262566667 | -0.1296      |
| SETMAR       | 0.1073       | 0.1308       | 0.187233333 | -0.1676      |
| BCL7C        | 0.219966667  | 0.1689       | 0.0748      | -0.169933333 |
| GIYD1        | 0.270066667  | 0.189833333  | 0.342633333 | -0.083466667 |
| NFIC         | 0.236166667  | 0.490533333  | 0.1822      | -0.196133333 |
| GLRX2        | 0.2518       | 0.3675       | 0.257266667 | -0.033033333 |
| C17orf49     | 0.0103       | 0.164833333  | 0.081666667 | -0.318666667 |
| PRMT6        | 0.2807       | 0.195233333  | 0.317233333 | 0.085433333  |
| CORO1B       | -0.063966667 | -0.037633333 | 0.128       | -0.267933333 |
| RAD9A        | 0.175833333  | 0.223433333  | 0.277266667 | -0.1248      |
| AMD1         | 0.738        | 0.646833333  | 0.593466667 | 0.3605       |
| LRRC16       | 0.164466667  | -0.029533333 | 0.229733333 | -0.223       |
| METTL3       | 0.148233333  | 0.375433333  | 0.334033333 | -0.0581      |
| NOP58        | 0.575533333  | 0.3451       | 0.404733333 | 0.147733333  |
| DCUN1D5      | 0.415266667  | 0.497566667  | 0.274466667 | 0.030766667  |
| DPAGT1       | -0.0305      | 0.119366667  | 0.2161      | -0.283166667 |
| WDR74        | 0.462333333  | 0.433266667  | 0.324366667 | -0.109533333 |
| ZNF254       | 0.232733333  | 0.285666667  | 0.133233333 | -0.1653      |
| LARS         | 0.121133333  | 0.032        | 0.095266667 | -0.3345      |
| ATL3         | 0.551733333  | 0.287733333  | 0.196166667 | 0.018866667  |
| PEX7         | 0.078666667  | 0.051666667  | 0.029266667 | -0.373633333 |
| TSPAN3       | -0.102433333 | -0.052133333 | 0.1903      | -0.3369      |
| KDELC2       | 0.430033333  | 0.3363       | 0.191966667 | -0.025933333 |
| CCDC128      | -0.179466667 | -0.031033333 | 0.140366667 | -0.389       |
| HECTD1       | 0.194133333  | 0.148966667  | 0.1358      | -0.2811      |
| LASS5        | 0.356066667  | 0.228533333  | 0.0655      | -0.1832      |
| LOC100129585 | 0.346333333  | 0.297933333  | 0.313833333 | 0.073833333  |
| BCYRN1       | 0.229666667  | 0.3114       | 0.4234      | 0.015966667  |

|           |              |              |              |              |
|-----------|--------------|--------------|--------------|--------------|
| IFITM3    | -0.285366667 | 0.059333333  | 0.1976       | -0.485966667 |
| WDR25     | 0.030066667  | -0.0241      | -0.029133333 | -0.402733333 |
| BEX4      | -0.083033333 | -0.193766667 | 0.246733333  | -0.416266667 |
| EML3      | 0.041633333  | 0.014766667  | 0.271566667  | -0.253133333 |
| PTPRG     | 0.181933333  | 0.156733333  | 0.217866667  | -0.2844      |
| YWHAH     | 0.487333333  | 0.376133333  | 0.239666667  | 0.0397       |
| MRPL49    | 0.275233333  | 0.220666667  | 0.185966667  | -0.051533333 |
| FAU       | 0.2084       | 0.1163       | 0.0959       | -0.231       |
| PFKFB3    | 0.843766667  | 0.697666667  | 0.5398       | 0.2669       |
| FKBP11    | 0.111433333  | 0.146433333  | 0.120733333  | -0.2674      |
| CDKN2D    | 0.5949       | 0.5175       | 0.583666667  | 0.160566667  |
| CCNA1     | 0.361066667  | 0.159133333  | 0.1799       | 0.0147       |
| SEPW1     | 0.126        | 0.238466667  | 0.1979       | -0.226933333 |
| LOC341315 | -0.016166667 | 0.1256       | 0.2271       | -0.296666667 |
| IDH3G     | 0.1458       | 0.155566667  | 0.176766667  | -0.229033333 |
| HSPB1     | 0.203        | 0.118633333  | -0.022966667 | -0.243       |
| FAM86A    | 0.163233333  | 0.534433333  | 0.357933333  | -0.081933333 |
| SNAPC3    | 0.260166667  | 0.173833333  | 0.248266667  | -0.149133333 |
| ZNF618    | 0.096566667  | 0.1114       | 0.063733333  | -0.216033333 |
| LOC644762 | 0.276766667  | 0.1863       | 0.398233333  | -0.0881      |
| TNFSF13B  | -0.0114      | 0.261733333  | 0.3591       | -0.169666667 |
| ILKAP     | 0.129766667  | 0.121466667  | 0.172766667  | -0.2767      |
| ZNF696    | 0.429666667  | 0.187933333  | 0.345766667  | 0.017066667  |
| HDHD1A    | 0.359233333  | 0.2854       | 0.2539       | -0.102833333 |
| TDP1      | 0.351766667  | 0.485933333  | 0.4238       | 0.180466667  |
| GPI       | 0.325166667  | 0.347966667  | 0.166766667  | -0.171466667 |
| CASP1     | 0.162733333  | 0.0687       | 0.647033333  | 0.026266667  |
| PIK3CB    | 0.071533333  | 0.087433333  | 0.4022       | -0.296266667 |
| MYB       | 0.0614       | 0.2451       | 0.307466667  | -0.023       |
| GPR56     | -0.058666667 | 0.0145       | 0.296466667  | -0.189766667 |
| PPME1     | 0.368833333  | 0.477133333  | 0.309233333  | 0.012766667  |
| RHBDD3    | 0.0603       | -0.0528      | -0.0158      | -0.360733333 |
| SGOL2     | 0.544633333  | 0.4049       | 0.193233333  | 0.004        |
| ATG4D     | 0.2526       | 0.2932       | 0.203733333  | -0.224533333 |
| FBXO11    | 0.159733333  | -0.050833333 | 0.167633333  | -0.307166667 |
| KLHL9     | 0.062833333  | 0.1057       | 0.006766667  | -0.400566667 |
| TUFM      | 0.057066667  | 0.22         | 0.230733333  | -0.244166667 |
| ZDHHC24   | 0.040866667  | 0.065033333  | 0.208633333  | -0.271466667 |
| FKBP1B    | -0.004433333 | 0.0515       | 0.2207       | -0.256933333 |
| EBAG9     | 0.079433333  | 0.139766667  | 0.189733333  | -0.307866667 |
| ZNF256    | 0.403466667  | 0.3026       | 0.1474       | -0.0384      |
| TCF20     | 0.2147       | 0.3486       | 0.346333333  | -0.098433333 |
| PIGO      | 0.0673       | 0.075566667  | 0.237633333  | -0.337633333 |
| SLC37A4   | 0.083066667  | 0.0068       | 0.345        | -0.281       |
| FAM135A   | 0.231433333  | 0.1743       | 0.198666667  | -0.1967      |
| C16orf59  | 0.337866667  | 0.4029       | 0.188366667  | -0.0397      |
| KIAA1333  | 0.3769       | 0.300566667  | 0.4887       | 0.050466667  |

|              |              |              |             |              |
|--------------|--------------|--------------|-------------|--------------|
| TCFL5        | -0.154966667 | 0.046866667  | 0.1053      | -0.463733333 |
| ZFP36L2      | 0.663066667  | 0.096333333  | 0.128666667 | -0.011266667 |
| RAD51C       | 0.373733333  | 0.3459       | 0.391       | -0.078       |
| TRAF3IP1     | 0.391433333  | 0.198733333  | 0.022933333 | -0.1936      |
| GTF2B        | 0.317166667  | 0.0976       | 0.203066667 | -0.158666667 |
| ERO1L        | 0.3141       | 0.308933333  | 0.3653      | -0.1476      |
| KPNA1        | 0.218066667  | 0.2992       | 0.244033333 | -0.1178      |
| MMGT1        | 0.2326       | 0.2688       | 0.052933333 | -0.168633333 |
| LOC646849    | 0.116966667  | -0.006966667 | 0.100566667 | -0.301166667 |
| ARFGEF1      | 0.130666667  | 0.1171       | 0.046466667 | -0.304433333 |
| TST          | 0.0633       | 0.0794       | 0.125033333 | -0.313733333 |
| HOXB2        | 1.007        | 0.6819       | 0.449766667 | 0.544366667  |
| GPR180       | 0.355866667  | 0.288333333  | 0.2643      | -0.043666667 |
| MRPL24       | 0.327        | 0.339933333  | 0.2837      | 0.015166667  |
| IPO4         | 0.441533333  | 0.366966667  | 0.2172      | 0.031666667  |
| CHCHD6       | -0.053466667 | 0.1244       | 0.626166667 | -0.133366667 |
| FLJ10374     | 0.256666667  | 0.200866667  | 0.1881      | -0.034866667 |
| C9orf127     | -0.091466667 | 0.139833333  | 0.491433333 | -0.259166667 |
| EIF4ENIF1    | 0.335566667  | 0.1695       | 0.1923      | -0.105666667 |
| RAB20        | 0.4004       | 0.2992       | 0.317166667 | -0.084566667 |
| KIF2C        | 0.470933333  | 0.296033333  | 0.305933333 | -0.001466667 |
| NUP35        | 0.5644       | 0.407466667  | 0.469866667 | 0.181166667  |
| LOC100131737 | 0.497033333  | 0.323333333  | 0.454666667 | 0.010333333  |
| PICK1        | -0.0087      | 0.1696       | 0.143633333 | -0.305066667 |
| LOC642513    | 0.5668       | 0.275533333  | 0.255333333 | 0.0953       |
| NFE2L2       | 0.15         | 0.107133333  | 0.003966667 | -0.243233333 |
| CYTSA        | 0.197033333  | 0.129066667  | 0.115133333 | -0.242066667 |
| C19orf70     | 0.121        | 0.148233333  | 0.0959      | -0.308066667 |
| PRRG1        | 0.348766667  | 0.308266667  | 0.188033333 | -0.081566667 |
| AZIN1        | 0.140566667  | 0.1784       | 0.2263      | -0.111033333 |
| C7orf55      | -0.104466667 | 0.082566667  | 0.300366667 | -0.236066667 |
| HJURP        | 0.495233333  | 0.4239       | 0.2816      | 0.1613       |
| DPP3         | 0.229033333  | 0.252033333  | 0.2803      | -0.147166667 |
| LOC653566    | 0.338        | 0.3409       | 0.348366667 | -0.078966667 |
| SNORD110     | 0.440533333  | 0.3715       | 0.240133333 | -0.151       |
| RAC3         | 0.31         | 0.0746       | 0.212566667 | -0.1616      |
| LIN28B       | 0.321633333  | 0.4566       | 0.674266667 | -0.036233333 |
| BMPR1A       | 0.138133333  | 0.310433333  | 0.318366667 | -0.126533333 |
| TNFSF12      | -0.003533333 | 0.028533333  | 0.243033333 | -0.323766667 |
| RNF14        | -0.033933333 | -0.073033333 | 0.080966667 | -0.382666667 |
| EDG7         | 0.298766667  | 0.319966667  | 0.448466667 | -0.114166667 |
| ENOSF1       | -0.088266667 | 0.101966667  | 0.480266667 | -0.316466667 |
| LOC731954    | 0.4108       | 0.322466667  | 0.147233333 | -0.110466667 |
| LPL          | 0.400766667  | 0.329566667  | 0.309633333 | -0.067866667 |
| C2orf76      | 0.1573       | 0.3622       | 0.305566667 | -0.114166667 |
| DBR1         | 0.1307       | 0.425833333  | 0.251266667 | -0.226033333 |
| COQ2         | 0.297433333  | 0.359366667  | 0.3256      | -0.0843      |

|              |              |              |              |              |
|--------------|--------------|--------------|--------------|--------------|
| LOC100190986 | 0.112966667  | 0.291666667  | 0.467533333  | -0.289666667 |
| CD276        | 0.412433333  | 0.360633333  | 0.511033333  | -0.044133333 |
| SNX30        | 0.332433333  | 0.049933333  | 0.034        | -0.199166667 |
| MRPL37       | 0.2278       | 0.1018       | 0.281866667  | -0.167566667 |
| AATF         | 0.299966667  | 0.285833333  | 0.265566667  | -0.012433333 |
| ACIN1        | 0.3126       | 0.164933333  | 0.2734       | -0.109       |
| BLMH         | 0.015133333  | 0.055566667  | 0.155        | -0.138366667 |
| YIF1B        | 0.166633333  | 0.149933333  | 0.331033333  | -0.182633333 |
| SUPT16H      | 0.2762       | 0.3146       | 0.3658       | -0.052333333 |
| RAD23A       | 0.261733333  | 0.251333333  | 0.435633333  | -0.065933333 |
| CEP192       | 0.176533333  | 0.255933333  | 0.243        | -0.182366667 |
| CAPRIN2      | 0.095566667  | 0.252866667  | 0.2474       | -0.180833333 |
| RAB11FIP2    | 0.337        | 0.2202       | 0.1484       | -0.1755      |
| FNIP2        | -0.030466667 | 0.137633333  | 0.4148       | -0.085833333 |
| FRAP1        | 0.1827       | 0.0679       | 0.188933333  | -0.314633333 |
| RNPS1        | 0.4385       | 0.219166667  | 0.3552       | 0.026433333  |
| SLC25A17     | 0.394366667  | 0.258        | 0.438866667  | 0.0551       |
| DNAJC3       | 0.368966667  | 0.458933333  | 0.254133333  | -0.028533333 |
| ZDHC8        | 0.190833333  | 0.223333333  | 0.174466667  | -0.3036      |
| C17orf58     | 0.247966667  | 0.172466667  | 0.435466667  | -0.142833333 |
| ACOT2        | -0.042466667 | -0.154533333 | 0.0606       | -0.486       |
| FBXL7        | -0.0437      | 0.062766667  | 0.313833333  | -0.198266667 |
| LOC100129144 | 0.280033333  | 0.295033333  | 0.3052       | -0.037533333 |
| LOC729774    | 0.603133333  | 0.4006       | 0.218333333  | -0.046266667 |
| RBBP7        | 0.282466667  | 0.211133333  | 0.282833333  | -0.139       |
| APLP2        | 0.1729       | 0.0756       | 0.267366667  | -0.206966667 |
| MAD2L2       | 0.2452       | 0.285233333  | 0.397533333  | -0.113866667 |
| C11orf71     | -0.027833333 | 0.253866667  | 0.1416       | -0.2339      |
| TUB          | -0.0745      | 0.035233333  | 0.128533333  | -0.4588      |
| H3F3A        | 0.1603       | 0.155        | 0.1927       | -0.281333333 |
| TGIF2        | 0.199333333  | 0.087933333  | 0.4439       | -0.102666667 |
| HDHD2        | 0.1345       | 0.149566667  | 0.176066667  | -0.231966667 |
| SYPL1        | 0.351833333  | 0.379666667  | 0.466466667  | 0.0747       |
| USP24        | 0.132366667  | 0.061666667  | 0.184966667  | -0.387       |
| DAGLA        | 0.260833333  | 0.1826       | 0.098        | -0.2324      |
| CHAF1B       | 0.228866667  | 0.369166667  | 0.346066667  | 0.0483       |
| KIAA2013     | 0.219233333  | 0.034466667  | 0.029933333  | -0.228466667 |
| NUDT9        | 0.0512       | 0.1316       | 0.243433333  | -0.2653      |
| MCAT         | 0.3843       | 0.338366667  | 0.3144       | -0.012233333 |
| OSGEPL1      | -0.041166667 | 0.112533333  | 0.2801       | -0.268533333 |
| TMEM192      | -0.004666667 | 0.207233333  | 0.204966667  | -0.098466667 |
| ASPM         | 0.44         | 0.225866667  | 0.334133333  | -0.058833333 |
| B3GNT2       | 0.252933333  | 0.149733333  | 0.404633333  | -0.080466667 |
| PCK2         | -0.348166667 | -0.3674      | -0.383366667 | -0.833366667 |
| SMARCB1      | 0.231233333  | 0.294233333  | 0.163533333  | -0.081733333 |
| CPNE3        | 0.1711       | 0.106033333  | 0.236366667  | -0.1479      |
| PARVB        | 0.341666667  | 0.415866667  | 0.114166667  | -0.140666667 |

|              |              |              |              |              |
|--------------|--------------|--------------|--------------|--------------|
| ADCK2        | 0.075766667  | 0.393333333  | 0.4505       | -0.109733333 |
| RBM25        | 0.459366667  | 0.2877       | 0.4388       | 0.0231       |
| KLRAQ1       | -0.310433333 | -0.1034      | 0.090966667  | -0.5027      |
| VRK1         | 0.479866667  | 0.436466667  | 0.395766667  | 0.102733333  |
| ARL2         | -0.0819      | 0.0032       | 0.202933333  | -0.418933333 |
| GPSM1        | 0.1943       | 0.186633333  | 0.128233333  | -0.335933333 |
| SLC29A1      | 0.4727       | 0.447066667  | 0.316133333  | 0.014033333  |
| LOC100129599 | -0.028366667 | 0.222333333  | -0.014533333 | -0.355566667 |
| ACACA        | -0.029       | 0.089166667  | 0.3401       | -0.274366667 |
| LIG1         | 0.362033333  | 0.359666667  | 0.2473       | -0.069733333 |
| MRPL40       | 0.092966667  | 0.0992       | 0.149266667  | -0.2202      |
| HDAC6        | 0.068466667  | -0.040833333 | 0.094866667  | -0.3498      |
| PCOLCE2      | -0.0205      | -0.0048      | 0.055566667  | -0.3975      |
| BTBD12       | 0.4476       | 0.3318       | 0.260033333  | -0.015       |
| RETSAT       | -0.009333333 | -0.088333333 | 0.412533333  | -0.378566667 |
| LOC100133803 | 0.270566667  | 0.399666667  | 0.243433333  | -0.190166667 |
| EIF4EBP1     | 0.009666667  | 0.117133333  | 0.038266667  | -0.304       |
| PIK3C2B      | -0.0521      | 0.0064       | 0.057833333  | -0.386       |
| LPAR3        | 0.086233333  | 0.3484       | 0.508266667  | -0.092133333 |
| PDIA5        | 0.153966667  | 0.2251       | 0.0296       | -0.293566667 |
| PNPLA6       | 0.036866667  | 0.0775       | -0.018066667 | -0.4408      |
| LOC654042    | 0.0736       | 0.146733333  | 0.365        | -0.2687      |
| STOML2       | 0.3077       | 0.3167       | 0.316166667  | -0.016633333 |
| LOC641844    | 0.077466667  | 0.0725       | 0.2679       | -0.185533333 |
| MIIP         | 0.309033333  | 0.1903       | 0.1859       | -0.0916      |
| HSD17B14     | -0.071666667 | -0.1993      | 0.420033333  | -0.3649      |
| PDHX         | 0.407866667  | 0.315366667  | 0.297933333  | -0.001933333 |
| HLTF         | 0.140966667  | 0.1653       | 0.1292       | -0.330166667 |
| EIF4A2       | -0.1803      | 0.0292       | 0.207666667  | -0.503033333 |
| RCN2         | 0.083466667  | 0.293066667  | 0.2981       | -0.240733333 |
| JMJD1A       | 0.1699       | 0.160033333  | 0.1421       | -0.446066667 |
| SFT2D1       | 0.361966667  | 0.271033333  | 0.373066667  | -0.0962      |
| SLC12A9      | 0.134233333  | 0.161433333  | 0.182433333  | -0.171866667 |
| AGPS         | 0.4231       | 0.3557       | 0.313066667  | -0.065       |
| EP300        | 0.330166667  | 0.195566667  | 0.320533333  | -0.109033333 |
| ZNF681       | 0.4288       | 0.386433333  | 0.133433333  | -0.074366667 |
| LOC728142    | 0.159033333  | 0.279933333  | 0.081366667  | -0.113166667 |
| HNRNPA3P1    | 0.3944       | 0.2789       | 0.3799       | -0.1365      |
| LOC644113    | 0.134166667  | 0.152666667  | 0.295633333  | -0.1908      |
| LOC100130516 | 0.262333333  | 0.3919       | 0.403133333  | -0.075533333 |
| ANKRD54      | 0.150666667  | 0.1534       | 0.269766667  | -0.142233333 |
| ATP5D        | 0.3154       | 0.312333333  | 0.2332       | -0.195133333 |
| LOC100130835 | 0.312566667  | 0.2978       | 0.4541       | -0.016866667 |
| HAGHL        | -0.198133333 | 0.067166667  | 0.346933333  | -0.337633333 |
| FAT3         | 0.139233333  | 0.293833333  | 0.053466667  | -0.301866667 |
| UNC13B       | 0.1642       | 0.118566667  | 0.225666667  | -0.160933333 |
| C14orf106    | 0.568766667  | 0.369433333  | 0.5202       | 0.106        |



|           |              |              |             |              |
|-----------|--------------|--------------|-------------|--------------|
| LNX2      | 0.241766667  | 0.157466667  | 0.3081      | -0.081033333 |
| AKR7A2    | 0.124133333  | 0.1831       | 0.272333333 | -0.333466667 |
| SEMA6B    | 0.370233333  | 0.433166667  | -0.0021     | -0.107433333 |
| PPM1F     | -0.007533333 | 0.173733333  | 0.438366667 | -0.102466667 |
| AGK       | 0.497866667  | 0.3458       | 0.1794      | 0.027233333  |
| C14orf112 | 0.288233333  | 0.316333333  | 0.4085      | 0.0473       |
| SLC38A10  | 0.060266667  | 0.081766667  | 0.270266667 | -0.256533333 |
| EMILIN2   | 0.2175       | 0.061033333  | 0.231933333 | -0.0978      |
| HIATL1    | 0.065266667  | 0.072033333  | 0.214166667 | -0.1972      |
| POP1      | 0.591233333  | 0.4604       | 0.440066667 | 0.236633333  |
| ANKRD6    | 0.101366667  | 0.1158       | 0.2881      | -0.3081      |
| CCDC77    | 0.2816       | 0.5249       | 0.353833333 | -0.071333333 |
| LOC732419 | 0.769533333  | 0.5832       | 0.1689      | 0.099566667  |
| CCT4      | 0.1715       | 0.272766667  | 0.273033333 | -0.2315      |
| PIGU      | 0.144166667  | 0.333433333  | 0.332966667 | -0.1643      |
| RPUSD3    | 0.1822       | 0.192766667  | 0.257766667 | -0.1779      |
| LAP3      | 0.167166667  | 0.146533333  | 0.278866667 | -0.219933333 |
| SSH2      | 0.182766667  | 0.211933333  | 0.433       | -0.102766667 |
| ALKBH7    | -0.0237      | -0.022933333 | 0.040333333 | -0.473766667 |
| CCDC47    | 0.429833333  | 0.267833333  | 0.218033333 | -0.066666667 |
| HP1BP3    | 0.258333333  | 0.2098       | 0.212933333 | -0.253633333 |
| R3HCC1    | 0.1186       | 0.0419       | 0.269433333 | -0.2675      |
| SBF1      | 0.235366667  | 0.066966667  | 0.105366667 | -0.2499      |
| FAM168B   | 0.398366667  | 0.206033333  | 0.261366667 | -0.163866667 |
| LOC644517 | 0.3196       | 0.428        | 0.529266667 | -0.102466667 |
| SPEN      | 0.4235       | 0.237333333  | 0.302666667 | -0.1235      |
| KLHL8     | 0.2166       | 0.453166667  | 0.464866667 | 0.012433333  |
| LOC440895 | 0.1621       | 0.1109       | 0.1101      | -0.187966667 |
| NFYC      | 0.1623       | 0.313166667  | 0.329433333 | -0.1406      |
| EML4      | 0.097333333  | 0.237866667  | 0.200666667 | -0.278833333 |
| FAM83H    | 0.3967       | 0.227566667  | 0.271133333 | -0.079233333 |
| SS18L1    | -0.008166667 | 0.169433333  | 0.695533333 | -0.0792      |
| LOC440731 | 0.114566667  | 0.213633333  | 0.6267      | -0.231966667 |
| RBMX      | 0.379633333  | 0.361033333  | 0.2363      | -0.050366667 |
| DICER1    | 0.198066667  | 0.2704       | 0.481166667 | -0.0976      |
| TBC1D22A  | 0.0731       | 0.237333333  | 0.2573      | -0.2713      |
| ZNF593    | 0.275433333  | 0.342666667  | 0.2374      | -0.094333333 |
| UBIAD1    | 0.233866667  | 0.489933333  | 0.331233333 | 0.027966667  |
| C21orf70  | 0.256733333  | 0.455066667  | 0.355066667 | -0.007566667 |
| RUFY3     | -0.231133333 | -0.040466667 | 0.424466667 | -0.344233333 |
| HEATR5B   | 0.167466667  | 0.141966667  | 0.345966667 | -0.2114      |
| ZNF608    | -0.2429      | 0.001233333  | 0.216866667 | -0.495366667 |
| SRBD1     | -0.0155      | 0.2126       | 0.222       | -0.355566667 |
| LOC651816 | 0.600166667  | 0.554966667  | 0.3769      | 0.109166667  |
| MOBK1A    | 0.285        | 0.227733333  | 0.399066667 | -0.001166667 |
| M6PR      | 0.125233333  | 0.093066667  | 0.410433333 | -0.1783      |
| RGS20     | 0.102233333  | 0.078166667  | 0.568566667 | 0.059866667  |

|              |              |              |              |              |
|--------------|--------------|--------------|--------------|--------------|
| L2HGDH       | 0.216733333  | 0.3146       | 0.489933333  | -0.067733333 |
| ESPL1        | 0.473233333  | 0.393566667  | 0.282133333  | -0.1705      |
| FAM86B1      | 0.461233333  | 0.400433333  | 0.5055       | 0.014766667  |
| THOC2        | 0.268533333  | 0.353433333  | 0.348366667  | -0.2345      |
| ECM1         | -0.0188      | 0.035633333  | 0.210033333  | -0.2987      |
| MGST3        | 0.037133333  | -0.0381      | 0.246133333  | -0.3962      |
| MATN2        | 0.055533333  | 0.038133333  | -0.107533333 | -0.402766667 |
| REEP4        | 0.5185       | 0.303833333  | 0.319066667  | -0.0478      |
| CABIN1       | 0.005066667  | 0.079033333  | 0.217566667  | -0.332       |
| LOC100127888 | 0.0361       | 0.137666667  | 0.214233333  | -0.3102      |
| CDCA4        | 0.6118       | 0.560666667  | 0.382733333  | 0.138        |
| DNAJB14      | 0.273766667  | 0.442466667  | 0.4976       | -0.0522      |
| NPDC1        | 0.2672       | 0.398366667  | 0.147166667  | -0.132066667 |
| TCN1         | 0.2503       | 0.346866667  | 0.311733333  | -0.076       |
| ABC7         | 0.094333333  | 0.0766       | 0.255666667  | -0.3326      |
| PRKAR1A      | 0.132266667  | 0.0845       | 0.2818       | -0.276       |
| CCDC88A      | 0.2579       | 0.285066667  | 0.4668       | -0.126966667 |
| LHX8         | 0.424833333  | -0.045866667 | -0.072833333 | -0.0665      |
| MFAP3L       | 0.090666667  | 0.1963       | 0.134866667  | -0.311133333 |
| IMPAD1       | 0.183033333  | 0.243666667  | 0.182766667  | -0.199433333 |
| HMGCR        | -0.062266667 | 0.1777       | 0.5506       | 0.0744       |
| AGPAT5       | 0.413566667  | 0.373233333  | 0.395066667  | -0.100166667 |
| CHORDC1      | 0.6955       | 0.624233333  | 0.433333333  | 0.133833333  |
| LOC651697    | 0.522733333  | 0.354733333  | 0.4587       | -0.0074      |
| HSD17B12     | 0.1614       | 0.1381       | 0.321        | -0.165133333 |
| TTC3         | -0.1764      | -0.052866667 | 0.374233333  | -0.501066667 |
| C2orf24      | -0.0221      | 0.0916       | -0.043066667 | -0.3563      |
| NCLN         | 0.462        | 0.531333333  | 0.305666667  | 0.088933333  |
| FOXC1        | 0.446266667  | 0.1988       | 0.093566667  | 0.034666667  |
| LOC653119    | 0.551933333  | 0.3315       | 0.4451       | 0.0097       |
| P2RX4        | 0.0112       | -0.048566667 | 0.055466667  | -0.493733333 |
| TIMM8B       | 0.187366667  | 0.342233333  | 0.350233333  | -0.1854      |
| PFKM         | -0.071966667 | 0.1164       | 0.287266667  | -0.223133333 |
| PMM1         | 0.0245       | 0.085633333  | 0.103733333  | -0.287633333 |
| STT3A        | 0.057866667  | 0.195633333  | 0.081766667  | -0.3715      |
| CHST10       | 0.167266667  | 0.1503       | 0.179533333  | -0.208066667 |
| JAK2         | 0.090333333  | 0.136066667  | 0.389433333  | -0.226233333 |
| CWF19L2      | 0.235466667  | 0.1383       | 0.104966667  | -0.199933333 |
| DUSP14       | 0.8313       | 0.4302       | 0.312733333  | 0.225766667  |
| GRHR         | 0.113933333  | -0.045866667 | 0.142633333  | -0.298533333 |
| PIP5K2A      | 0.357966667  | 0.234433333  | 0.338433333  | -0.1161      |
| TMEM50B      | -0.1756      | 0.025266667  | 0.073766667  | -0.342366667 |
| PPAT         | 0.511633333  | 0.656533333  | 0.5645       | 0.049866667  |
| LOC388681    | 0.163466667  | 0.0461       | 0.7028       | -0.257233333 |
| ETS1         | 0.114433333  | 0.1623       | 0.089466667  | -0.3508      |
| IL28RA       | 0.4157       | 0.3321       | 0.2795       | -0.044233333 |
| EIF4E2       | 0.214066667  | 0.323566667  | 0.4199       | -0.000633333 |

|              |              |              |              |              |
|--------------|--------------|--------------|--------------|--------------|
| C19orf60     | 0.113733333  | 0.026066667  | 0.183466667  | -0.374733333 |
| MRPL21       | 0.438733333  | 0.2463       | 0.156533333  | -0.0803      |
| LYPLA1       | 0.315933333  | 0.3757       | 0.3114       | -0.0886      |
| MAP2K2       | 0.2453       | 0.221566667  | 0.070266667  | -0.1459      |
| KIAA0556     | -0.0456      | 0.132466667  | 0.421333333  | -0.218866667 |
| FRMD5        | 0.449066667  | 0.405333333  | 0.234766667  | 0.006833333  |
| SHMT1        | 0.1976       | 0.312566667  | 0.4984       | -0.044133333 |
| ZNF800       | 0.538333333  | 0.491433333  | 0.327266667  | 0.162866667  |
| CENPM        | 0.393466667  | 0.342166667  | 0.481666667  | -0.002166667 |
| TRPV4        | 0.1676       | 0.332533333  | 0.4464       | -0.150933333 |
| GCA          | 0.380433333  | 0.305333333  | 0.444433333  | -0.130366667 |
| TYK2         | 0.1567       | 0.066466667  | 0.1763       | -0.266933333 |
| LOC730107    | 0.231        | 0.381733333  | 0.1991       | -0.1502      |
| MTIF2        | 0.0897       | 0.089766667  | 0.043133333  | -0.386133333 |
| ZC3H5        | 0.001833333  | -0.014766667 | 0.155133333  | -0.391133333 |
| FNTA         | 0.094633333  | 0.175866667  | 0.184466667  | -0.241033333 |
| NFKB1        | 0.183033333  | 0.285266667  | 0.1809       | -0.1009      |
| ATP5L        | 0.056066667  | 0.038633333  | 0.169966667  | -0.287833333 |
| ITM2C        | -0.004       | 0.0434       | 0.121366667  | -0.4305      |
| RRBP1        | 0.356966667  | 0.3449       | 0.124233333  | -0.1713      |
| EYA4         | -0.096366667 | 0.050633333  | 0.238566667  | -0.414566667 |
| YPEL2        | -0.084866667 | 0.116433333  | 0.1762       | -0.352666667 |
| ATP1B3       | 0.545333333  | 0.270033333  | 0.381033333  | 0.010066667  |
| LOC646278    | 0.1947       | 0.219066667  | 0.3798       | -0.197233333 |
| RBMS1        | 0.576266667  | 0.4706       | 0.110333333  | -0.018966667 |
| NIT2         | 0.045466667  | 0.0385       | 0.1533       | -0.294033333 |
| ZFP91        | 0.3313       | 0.5825       | 0.554        | 0.017233333  |
| BZW2         | 0.2793       | 0.338566667  | 0.531533333  | -0.054766667 |
| MFN1         | 0.143566667  | 0.097433333  | 0.197166667  | -0.199766667 |
| MYST3        | 0.1365       | 0.260233333  | 0.1541       | -0.318533333 |
| NBN          | 0.1454       | 0.249266667  | 0.466166667  | -0.071333333 |
| GSTM4        | -0.042633333 | 0.102466667  | 0.268266667  | -0.262533333 |
| COX5A        | 0.139566667  | 0.234966667  | 0.408166667  | -0.155866667 |
| MRPS28       | 0.142766667  | 0.447466667  | 0.343433333  | -0.111       |
| GALC         | 0.0001       | 0.057533333  | 0.082966667  | -0.450666667 |
| RAP1GDS1     | 0.463866667  | 0.375666667  | 0.408033333  | -0.022766667 |
| LRRC16A      | 0.0705       | 0.1026       | 0.247166667  | -0.447666667 |
| PLXNB3       | 0.1399       | 0.305966667  | 0.1484       | -0.230433333 |
| LOC646750    | 0.406066667  | 0.446866667  | 0.4302       | 0.085933333  |
| C8orf76      | 0.276733333  | 0.282866667  | 0.360733333  | -0.1021      |
| LOC100130550 | 0.534833333  | 0.505766667  | 0.331866667  | 0.086466667  |
| LOC339352    | -0.267033333 | 0.135766667  | 0.1013       | -0.495833333 |
| PSAT1        | -0.464233333 | -0.415933333 | -0.193366667 | -0.756633333 |
| WDSOF1       | 0.339233333  | 0.352033333  | 0.161833333  | -0.169133333 |
| PPAP2A       | 0.1235       | 0.028433333  | -0.1229      | -0.3562      |
| RNASEH2A     | 0.233633333  | 0.471433333  | 0.4587       | -0.0617      |
| SLC9A3R1     | 0.0616       | 0.223166667  | 0.276266667  | -0.327766667 |

|          |              |              |              |              |
|----------|--------------|--------------|--------------|--------------|
| PUS3     | 0.1009       | 0.261933333  | 0.1816       | -0.308233333 |
| BPNT1    | 0.2897       | 0.337433333  | 0.322133333  | -0.1609      |
| FLJ10986 | 0.0435       | -0.006466667 | -0.1486      | -0.584766667 |
| WBP11    | 0.426033333  | 0.267133333  | 0.358166667  | -0.0867      |
| SIRT2    | 0.069633333  | 0.1449       | 0.326133333  | -0.263866667 |
| KIAA0391 | 0.238066667  | 0.1961       | 0.339666667  | -0.161966667 |
| ZMYM3    | 0.1756       | 0.058533333  | 0.175633333  | -0.467866667 |
| EIF2B2   | 0.2677       | 0.4127       | 0.6881       | -0.0013      |
| FAM111B  | 0.241233333  | 0.659833333  | 0.544233333  | -0.0076      |
| TMEM187  | -0.223866667 | 0.001433333  | 0.1695       | -0.673233333 |
| CHD8     | 0.1618       | 0.270366667  | 0.0857       | -0.3058      |
| HEATR5A  | 0.1276       | 0.112966667  | 0.124        | -0.3353      |
| MIR30B   | 0.447766667  | 0.487133333  | 0.3611       | 0.143933333  |
| BEXL1    | -0.1196      | -0.069766667 | 0.1952       | -0.5229      |
| C6orf66  | 0.3858       | 0.580033333  | 0.367866667  | -0.010233333 |
| SNX27    | -0.010133333 | 0.074733333  | 0.320633333  | -0.318066667 |
| ALG10B   | 0.159766667  | 0.4061       | 0.4921       | -0.122333333 |
| TMEM166  | 0.362666667  | 0.181133333  | 0.386333333  | -0.067766667 |
| PPM1B    | 0.2992       | 0.065233333  | 0.2413       | -0.227166667 |
| STXBP1   | 0.109633333  | 0.129166667  | 0.440533333  | -0.192533333 |
| EIF3K    | 0.126766667  | 0.211366667  | 0.037633333  | -0.2943      |
| SNN      | 0.127        | -0.050433333 | 0.0118       | -0.329233333 |
| ATP6V0B  | 0.4697       | 0.275166667  | 0.229533333  | -0.0199      |
| GK       | 0.2113       | 0.2477       | 0.424466667  | -0.144266667 |
| GTPBP3   | 0.299066667  | 0.362333333  | 0.332966667  | -0.127766667 |
| KIAA1826 | 0.255366667  | 0.296566667  | 0.4947       | -0.050466667 |
| HLA-E    | -0.037633333 | 0.027133333  | 0.151133333  | -0.3539      |
| AGPAT6   | 0.133966667  | 0.145766667  | 0.328166667  | -0.2185      |
| WDR40A   | 0.225566667  | 0.013833333  | 0.187033333  | -0.1651      |
| RICS     | 0.027233333  | 0.202933333  | 0.2617       | -0.326366667 |
| FAM178B  | 0.0408       | 0.1682       | 0.237        | -0.324866667 |
| OXCT1    | 0.215666667  | 0.183466667  | 0.368566667  | -0.1419      |
| PRKCD    | 0.575333333  | 0.4139       | 0.2455       | 0.0337       |
| PREB     | 0.314166667  | 0.3359       | 0.103233333  | -0.106166667 |
| GCSH     | 0.467033333  | 0.446366667  | 0.429733333  | 0.076133333  |
| BSCL2    | -0.185166667 | -0.066633333 | 0.231066667  | -0.596533333 |
| D2HGDH   | -0.0918      | -0.0573      | 0.142366667  | -0.534       |
| SLC39A11 | -0.2398      | 0.0431       | -0.003333333 | -0.421666667 |
| TP53I3   | 0.1087       | 0.150166667  | 0.107866667  | -0.153233333 |
| RDH13    | 0.3938       | 0.409666667  | 0.4319       | -0.064633333 |
| DHX37    | 0.559833333  | 0.493433333  | 0.347866667  | 0.074633333  |
| ZCCHC14  | 0.152366667  | 0.037533333  | 0.262966667  | -0.2165      |
| STXBP2   | 0.1693       | 0.0532       | 0.0137       | -0.333466667 |
| ATP6V1H  | -0.037966667 | 0.138666667  | 0.377933333  | -0.117366667 |
| PMF1     | 0.2369       | 0.181333333  | 0.210966667  | -0.135066667 |
| NAPG     | 0.406866667  | 0.386966667  | 0.3175       | -0.059466667 |
| CLSTN1   | 0.0867       | 0.0649       | -0.054266667 | -0.416733333 |

|           |              |              |             |              |
|-----------|--------------|--------------|-------------|--------------|
| SCO2      | 0.3703       | 0.346833333  | 0.203966667 | -0.003833333 |
| ANKRD49   | 0.182033333  | 0.151866667  | 0.096133333 | -0.2594      |
| PRDM10    | 0.242933333  | 0.072366667  | 0.2989      | -0.072933333 |
| PAFAH1B3  | 0.197566667  | 0.056633333  | 0.293666667 | -0.159966667 |
| DLGAP5    | 0.5269       | 0.430233333  | 0.2414      | -0.055366667 |
| TRAF7     | 0.1576       | 0.108833333  | 0.187433333 | -0.3805      |
| RPL36AL   | 0.3778       | 0.3105       | 0.236866667 | -0.108233333 |
| PKMYT1    | 0.5007       | 0.4324       | 0.373466667 | 0.113333333  |
| GNAS      | 0.143166667  | 0.248066667  | 0.2595      | -0.258533333 |
| PCNA      | 0.406533333  | 0.4265       | 0.410366667 | -0.025233333 |
| MRS2      | 0.500766667  | 0.367766667  | 0.335966667 | 0.016633333  |
| NDUFB9    | 0.2739       | 0.383033333  | 0.220466667 | -0.139366667 |
| NDUFA13   | 0.029966667  | 0.050833333  | 0.187966667 | -0.413066667 |
| RPIA      | 0.380133333  | 0.559233333  | 0.411433333 | -0.062666667 |
| MEX3C     | 0.282966667  | 0.3023       | 0.407766667 | -0.045466667 |
| USF2      | 0.171266667  | -0.040866667 | 0.200066667 | -0.208033333 |
| FAM108C1  | 0.576633333  | 0.566866667  | 0.626933333 | 0.233133333  |
| KIAA0430  | -0.078133333 | -0.203766667 | 0.1228      | -0.533366667 |
| LOC727967 | 0.358933333  | 0.314733333  | 0.402       | -0.161633333 |
| GFM1      | 0.299666667  | 0.1893       | 0.402366667 | -0.191933333 |
| POLR1E    | 0.356566667  | 0.572666667  | 0.359366667 | -0.047366667 |
| TIA1      | 0.3256       | 0.228333333  | 0.3253      | -0.1456      |
| SFXN4     | 0.269633333  | 0.457233333  | 0.4514      | -0.109633333 |
| LOC644033 | 0.2027       | 0.220166667  | 0.1635      | -0.1153      |
| IFT81     | 0.1443       | 0.156866667  | 0.318566667 | -0.2219      |
| ADI1      | -0.117133333 | 0.171533333  | 0.0254      | -0.554033333 |
| WDR20     | 0.319166667  | 0.128433333  | 0.027466667 | -0.167666667 |
| ANKRD36   | 0.2212       | 0.3592       | 0.652266667 | -0.106766667 |
| GPD2      | 0.557133333  | 0.470933333  | 0.450966667 | -0.027866667 |
| PLSCR4    | -0.2631      | -0.006166667 | -0.0159     | -0.573033333 |
| IDI1      | 0.1527       | 0.1912       | 0.455466667 | 0.206933333  |
| TRAF5     | 0.298866667  | 0.2221       | 0.330566667 | -0.173433333 |
| ARHGDIB   | 0.5364       | 0.468366667  | 0.194233333 | -0.014666667 |
| YDJC      | 0.251766667  | 0.3607       | 0.2898      | -0.176733333 |
| CCDC124   | 0.4249       | 0.415833333  | 0.3814      | 0.0297       |
| ARHGAP11A | 0.602433333  | 0.367933333  | 0.416733333 | 0.003666667  |
| HADHB     | -0.011433333 | 0.021        | 0.358633333 | -0.3656      |
| NAB2      | 0.3777       | 0.168666667  | 0.3264      | -0.050533333 |
| UBE4A     | 0.138233333  | 0.147333333  | 0.202866667 | -0.344266667 |
| BCS1L     | 0.409066667  | 0.230266667  | 0.350233333 | -0.0562      |
| PHB2      | 0.1891       | 0.289333333  | 0.195       | -0.1697      |
| GAGE7     | 0.2496       | 0.3777       | 0.329633333 | -0.119966667 |
| LOC255187 | 0.620933333  | 0.4284       | 0.275       | -0.0761      |
| C1orf131  | 0.224133333  | 0.279666667  | 0.278533333 | -0.125333333 |
| HYOU1     | 0.195933333  | 0.127766667  | 0.2731      | -0.143066667 |
| ALDH4A1   | 0.118433333  | 0.023533333  | 0.2451      | -0.309133333 |
| GPAA1     | 0.044566667  | 0.136133333  | 0.3671      | -0.291433333 |

|              |              |              |              |              |
|--------------|--------------|--------------|--------------|--------------|
| VPS26B       | 0.102733333  | 0.195866667  | 0.2953       | -0.3738      |
| FLJ13305     | -0.109266667 | 0.147333333  | 0.485833333  | -0.270566667 |
| UBR5         | 0.1215       | 0.118033333  | 0.1525       | -0.3962      |
| GBAS         | 0.1073       | 0.185166667  | 0.199333333  | -0.2576      |
| UHRF1BP1     | -0.165533333 | -0.113433333 | 0.142366667  | -0.5446      |
| LOC100132948 | 0.2332       | 0.099533333  | 0.187533333  | -0.253266667 |
| ZNF700       | 0.281933333  | 0.385666667  | 0.487966667  | -0.130466667 |
| FRMD3        | 0.194866667  | 0.511366667  | 0.3138       | -0.130266667 |
| SLC44A3      | 0.083033333  | 0.1246       | 0.3229       | -0.2136      |
| TMC6         | 0.084766667  | 0.234033333  | 0.505666667  | -0.259866667 |
| GNPTG        | -0.022766667 | -0.040266667 | 0.082533333  | -0.479933333 |
| ATG4C        | 0.112666667  | 0.190366667  | 0.1867       | -0.3208      |
| LOC283683    | 0.0832       | 0.176066667  | 0.283233333  | -0.282833333 |
| BTN3A2       | -0.0613      | 0.149033333  | 0.611266667  | -0.290933333 |
| RAB2B        | 0.204466667  | 0.092366667  | 0.293066667  | -0.221966667 |
| IDH3A        | 0.3437       | 0.3781       | 0.452633333  | 0.007633333  |
| AVPI1        | 0.055466667  | 0.013966667  | 0.455233333  | -0.3715      |
| IFNAR2       | 0.069533333  | 0.155433333  | 0.258133333  | -0.3162      |
| GSDMD        | 0.046466667  | 0.1798       | 0.351033333  | -0.272433333 |
| CNIH         | 0.0985       | 0.101666667  | 0.1998       | -0.337866667 |
| SRM          | 0.234533333  | 0.3356       | 0.266333333  | -0.201466667 |
| ST7          | 0.051266667  | 0.155266667  | 0.4056       | -0.145733333 |
| SPAG1        | 0.329933333  | 0.568166667  | 0.493966667  | 0.0105       |
| SPIRE1       | -0.140566667 | 0.100966667  | 0.2904       | -0.390766667 |
| OSGEP        | 0.3466       | 0.301033333  | 0.375133333  | -0.100233333 |
| PTMS         | 0.306266667  | 0.1812       | 0.032166667  | -0.3347      |
| ARMC6        | 0.472933333  | 0.375833333  | 0.405833333  | 0.062433333  |
| PRMT5        | 0.525766667  | 0.4344       | 0.140933333  | -0.074233333 |
| GPR37        | 0.230033333  | 0.242666667  | 0.332466667  | -0.181833333 |
| DGAT1        | 0.0594       | 0.072033333  | 0.176        | -0.3031      |
| MRPS9        | 0.3591       | 0.472666667  | 0.393133333  | -0.051633333 |
| PLD6         | 0.563333333  | 0.493233333  | 0.400466667  | 0.054066667  |
| MRPS5        | 0.388333333  | 0.390933333  | 0.4147       | -0.029066667 |
| ZDHHC11      | 0.198633333  | 0.417066667  | 0.386166667  | -0.111433333 |
| ABTB1        | 0.034166667  | 0.026966667  | 0.0708       | -0.3702      |
| HPS5         | 0.2639       | 0.149833333  | 0.1242       | -0.265366667 |
| CCNB1IP1     | 0.1359       | 0.1052       | 0.186133333  | -0.274566667 |
| C12orf34     | 0.141233333  | 0.1834       | 0.331533333  | -0.198933333 |
| TMTC1        | -0.024066667 | -0.0761      | 0.2176       | -0.366766667 |
| ITPA         | 0.174666667  | 0.271633333  | 0.259533333  | -0.0516      |
| DHRS4        | 0.0629       | 0.281533333  | 0.267633333  | -0.141566667 |
| POLA2        | 0.420566667  | 0.523666667  | 0.3139       | -0.0374      |
| NAP1L3       | 0.299366667  | 0.151866667  | 0.0708       | -0.278233333 |
| PPM1K        | 0.196333333  | 0.3851       | 0.550433333  | -0.0446      |
| C22orf13     | 0.094066667  | 0.169766667  | 0.478833333  | -0.082733333 |
| LOC441408    | 0.324933333  | 0.218966667  | -0.045133333 | -0.1198      |
| CCDC21       | 0.558266667  | 0.432666667  | 0.4306       | 0.1092       |

|              |              |             |              |              |
|--------------|--------------|-------------|--------------|--------------|
| LOC100128975 | 0.266666667  | 0.3332      | 0.3263       | -0.1837      |
| GIPC1        | 0.227566667  | 0.4773      | 0.1941       | -0.1273      |
| CDC2L2       | 0.074766667  | 0.138166667 | 0.228233333  | -0.2451      |
| GTF3C2       | 0.318833333  | 0.305366667 | 0.2794       | -0.132933333 |
| PAGE5        | 0.177933333  | 0.249966667 | 0.228733333  | -0.195966667 |
| PDSS1        | 0.535133333  | 0.5575      | 0.410233333  | 0.113433333  |
| GNA13        | 0.204233333  | 0.116933333 | 0.204066667  | -0.237466667 |
| LOC647340    | 0.262466667  | 0.4547      | 0.543066667  | -0.0456      |
| C14orf104    | 0.273133333  | 0.2575      | 0.2657       | -0.109966667 |
| ATP7A        | 0.201266667  | 0.203033333 | 0.355        | -0.271066667 |
| FLJ10781     | 0.339033333  | 0.242733333 | 0.479566667  | -0.1196      |
| C8orf83      | 0.035366667  | 0.1055      | 0.179866667  | -0.424233333 |
| MAD2L1BP     | 0.3436       | 0.318166667 | 0.6981       | 0.123533333  |
| KIRREL       | 0.4416       | 0.520266667 | 0.1365       | -0.035433333 |
| NKRF         | 0.292866667  | 0.262766667 | 0.507        | -0.115533333 |
| CENPV        | 0.422866667  | 0.3261      | 0.3658       | -0.025       |
| TTC5         | 0.203466667  | 0.480966667 | 0.341933333  | -0.1361      |
| PYGL         | 0.227866667  | 0.1689      | 0.135366667  | -0.398833333 |
| STK10        | 0.580066667  | 0.511       | 0.667166667  | 0.199166667  |
| PTPN3        | 0.4086       | 0.357466667 | 0.402066667  | -0.032666667 |
| ABCC4        | 0.128733333  | 0.2383      | 0.493766667  | -0.164       |
| KDELR3       | 0.165266667  | 0.091866667 | -0.434933333 | -0.640533333 |
| MTM1         | 0.367733333  | 0.195       | 0.293666667  | -0.188833333 |
| RAVER1       | 0.468333333  | 0.3322      | 0.230133333  | -0.0472      |
| NDUFA7       | 0.2065       | 0.166366667 | 0.313166667  | -0.316666667 |
| NSMCE2       | 0.147733333  | 0.140733333 | -0.0009      | -0.2631      |
| FAM102A      | 0.024066667  | 0.017166667 | 0.0678       | -0.261       |
| HMGB3        | 0.3472       | 0.181466667 | 0.161933333  | -0.184733333 |
| DIXDC1       | 0.2662       | 0.456033333 | 0.235666667  | -0.2003      |
| BCL2L2       | 0.215066667  | 0.175433333 | 0.328466667  | -0.2209      |
| CALM1        | 0.320766667  | 0.185166667 | 0.345133333  | -0.090333333 |
| ARRB1        | 0.080733333  | 0.284666667 | 0.440133333  | -0.293333333 |
| PTTG1        | 0.4311       | 0.4386      | 0.756033333  | 0.056066667  |
| RPF1         | 0.4185       | 0.370766667 | 0.317833333  | -0.0656      |
| TFAP2C       | 0.6997       | 0.525066667 | 0.4924       | 0.260866667  |
| UBXN8        | 0.230433333  | 0.1535      | 0.3367       | -0.2058      |
| TXNDC14      | 0.557133333  | 0.487133333 | 0.437933333  | 0.114666667  |
| INO80C       | 0.336233333  | 0.311866667 | 0.375966667  | 0.0509       |
| THOC6        | 0.349066667  | 0.2329      | 0.177266667  | -0.250933333 |
| PARN         | 0.018066667  | 0.091866667 | 0.1426       | -0.261133333 |
| MBIP         | 0.268866667  | 0.314533333 | 0.088133333  | -0.209366667 |
| LOC647081    | 0.105866667  | 0.27        | 0.3193       | -0.370366667 |
| C6orf204     | 0.170233333  | 0.3995      | 0.6361       | -0.1217      |
| HEY1         | 0.2347       | 0.4304      | 0.7408       | 0.033033333  |
| TRAPPC6A     | -0.247166667 | -0.0882     | 0.226733333  | -0.621033333 |
| PPM1D        | 0.020766667  | 0.091566667 | 0.300066667  | -0.2076      |
| MAP3K11      | 0.2123       | 0.2988      | 0.248933333  | -0.2583      |

|            |              |             |             |              |
|------------|--------------|-------------|-------------|--------------|
| AOF2       | 0.283733333  | 0.4474      | 0.3216      | -0.193133333 |
| C2orf44    | 0.3428       | 0.246533333 | 0.372133333 | -0.0894      |
| ABCD1      | 0.2285       | 0.2651      | 0.318466667 | -0.142966667 |
| ST6GALNAC3 | 0.009866667  | 0.149566667 | 0.462266667 | -0.317066667 |
| PER3       | 0.120366667  | 0.0511      | 0.2127      | -0.310166667 |
| DSTN       | 0.438633333  | 0.294733333 | 0.021433333 | -0.1491      |
| B3GNT1     | -0.101866667 | 0.031466667 | 0.214333333 | -0.340066667 |
| PRAME      | 0.0321       | 0.139033333 | 0.4936      | -0.415133333 |
| TOR1AIP1   | 0.2436       | 0.204433333 | 0.216533333 | -0.1878      |
| CYC1       | 0.393366667  | 0.3328      | 0.301333333 | -0.059       |
| C14orf37   | 0.167333333  | 0.048733333 | 0.111666667 | -0.353366667 |
| FLJ12949   | 0.344466667  | 0.509766667 | 0.467566667 | 0.0048       |
| ARG2       | 0.0254       | 0.339       | 0.480333333 | -0.202133333 |
| DTNBP1     | 0.1379       | 0.1739      | 0.3329      | -0.308333333 |
| SERPINE2   | 0.150633333  | 0.134133333 | 0.325533333 | -0.205733333 |
| CDK2AP1    | 0.5721       | 0.5021      | 0.255366667 | -0.0671      |
| LOC729222  | -0.1321      | 0.474466667 | 0.331433333 | -0.298966667 |
| TMEM185B   | 0.345466667  | 0.4473      | 0.503333333 | 0.004333333  |
| RNASEL     | 0.019866667  | 0.0992      | 0.185133333 | -0.2944      |
| PSPC1      | 0.371333333  | 0.407966667 | 0.509633333 | -0.067       |
| SORBS1     | 0.2806       | 0.3225      | 0.349433333 | -0.181466667 |
| KCTD20     | -0.081333333 | 0.1817      | 0.247       | -0.4373      |
| EIF3L      | 0.0207       | 0.0686      | 0.243033333 | -0.4084      |
| RBAK       | 0.046233333  | 0.390633333 | 0.513933333 | -0.157       |
| DNAJB11    | 0.359433333  | 0.5511      | 0.473733333 | -0.016133333 |
| CHERP      | 0.466533333  | 0.3895      | 0.374633333 | 0.0167       |
| PARL       | 0.044833333  | 0.1091      | 0.359933333 | -0.2896      |
| LOC647588  | -0.032366667 | 0.002166667 | 0.4315      | -0.311433333 |
| BDH1       | 0.1208       | 0.1638      | 0.305266667 | -0.306333333 |
| SOBP       | 0.060166667  | 0.147166667 | 0.408233333 | -0.190933333 |
| TSPO       | 0.191233333  | 0.114133333 | 0.4385      | -0.0635      |
| MANEAL     | 0.2481       | 0.389633333 | 0.3795      | -0.084       |
| PCGF1      | 0.368266667  | 0.190833333 | 0.3178      | -0.116466667 |
| COX8A      | 0.181666667  | 0.2074      | 0.332866667 | -0.265033333 |
| RPUSD4     | 0.050333333  | 0.0773      | 0.108966667 | -0.313666667 |
| CHRNA5     | 0.403966667  | 0.465466667 | 0.391566667 | -0.013       |
| ATP6VOA2   | 0.288166667  | 0.365366667 | 0.3085      | -0.154633333 |
| PHLPP1     | 0.270733333  | 0.181933333 | 0.412       | -0.2147      |
| LDLRAP1    | 0.209033333  | 0.3096      | 0.281333333 | -0.1546      |
| LOC441376  | 0.326533333  | 0.3276      | 0.0445      | -0.331333333 |
| STAMBP     | 0.1495       | 0.294033333 | 0.238966667 | -0.2897      |
| LONRF3     | 0.648833333  | 0.6911      | 0.8005      | 0.2402       |
| LOC341965  | 0.576933333  | 0.4011      | 0.396266667 | -0.034733333 |
| TRIM33     | 0.299        | 0.0698      | 0.325466667 | -0.178       |
| USP6NL     | 0.225766667  | 0.232266667 | 0.364166667 | -0.211933333 |
| C14orf80   | 0.4516       | 0.551066667 | 0.371533333 | -0.0425      |
| ATP6VOA1   | 0.0912       | 0.175866667 | 0.4005      | -0.254666667 |



|           |              |             |             |              |
|-----------|--------------|-------------|-------------|--------------|
| KIF1B     | 0.185766667  | 0.214333333 | 0.3887      | -0.172533333 |
| POLR1D    | 0.104433333  | 0.4508      | 0.151166667 | -0.214766667 |
| GMCL1     | 0.117533333  | 0.413433333 | 0.472466667 | -0.226933333 |
| VAR52     | 0.102266667  | 0.106133333 | 0.134       | -0.328966667 |
| CD70      | 0.673233333  | 0.385533333 | 0.4359      | 0.004033333  |
| PLEKHF1   | 0.350333333  | 0.063466667 | 0.009966667 | -0.036233333 |
| DNAJC4    | -0.124733333 | 0.086566667 | 0.017733333 | -0.447466667 |
| BOLA3     | 0.498766667  | 0.4152      | 0.4035      | -0.000233333 |
| SDC2      | 0.130166667  | 0.289933333 | 0.166233333 | -0.280033333 |
| AGL       | 0.0303       | 0.0006      | 0.308833333 | -0.282233333 |
| PROSC     | 0.226        | 0.340833333 | 0.292166667 | -0.2038      |
| LOC647121 | 0.466433333  | 0.462033333 | 0.224433333 | -0.1158      |
| BRCC3     | 0.4385       | 0.318133333 | 0.3244      | -0.148366667 |
| MARS2     | 0.599633333  | 0.399233333 | 0.6159      | 0.124233333  |
| FAM176A   | 0.271233333  | 0.177533333 | 0.164566667 | -0.172433333 |
| PRR7      | 0.201266667  | 0.5257      | 0.610866667 | -0.053833333 |
| SDCCAG1   | 0.3353       | 0.3202      | 0.356866667 | -0.201466667 |
| RSC1A1    | 0.485466667  | 0.3285      | 0.3088      | -0.125       |
| SYNJ2BP   | 0.080966667  | 0.352233333 | 0.4655      | -0.3747      |
| STRN      | 0.564233333  | 0.4036      | 0.413       | -0.0197      |
| LDB2      | -0.000433333 | 0.2157      | 0.374866667 | -0.139433333 |
| SLC35B2   | 0.0599       | 0.1871      | 0.292766667 | -0.288666667 |
| HOXB7     | 0.137033333  | 0.364666667 | 0.3674      | -0.111233333 |
| ZNF395    | 0.2219       | 0.180566667 | 0.1066      | -0.377866667 |
| RCBTB2    | 0.038133333  | 0.0722      | 0.2874      | -0.327666667 |
| UCRC      | 0.042066667  | 0.196433333 | 0.196       | -0.567033333 |
| GAGE2A    | 0.2601       | 0.2933      | 0.270233333 | -0.2203      |
| CENTG2    | 0.4489       | 0.321766667 | 0.132533333 | -0.212966667 |
| HAUS8     | 0.4623       | 0.578833333 | 0.519766667 | 0.008033333  |
| HMBS      | 0.5054       | 0.4987      | 0.482866667 | -0.007       |
| ATP5A1    | 0.0305       | 0.2283      | 0.381566667 | -0.2967      |
| SNRK      | 0.170133333  | 0.084066667 | 0.5954      | -0.0697      |
| LOC613037 | 0.261266667  | 0.064966667 | 0.5424      | -0.276533333 |
| DRG1      | 0.4498       | 0.3906      | 0.2773      | -0.1184      |
| GRSF1     | 0.218866667  | 0.228966667 | 0.2666      | -0.283466667 |
| CDCA2     | 0.624033333  | 0.432       | 0.3843      | -0.0256      |
| MAP2K6    | 0.0665       | 0.303633333 | 0.3378      | -0.298466667 |
| CCBL2     | 0.133733333  | 0.398166667 | 0.384266667 | -0.229766667 |
|           | 4-Sep        | 0.2308      | 0.128733333 | 0.056066667  |
| C11orf54  | -0.067533333 | 0.136133333 | 0.055733333 | -0.518333333 |
| LOC649841 | 0.097033333  | 0.517666667 | 0.4712      | -0.3027      |
| ELF1      | -0.108966667 | 0.043       | 0.205266667 | -0.450833333 |
| POLD1     | 0.3369       | 0.591066667 | 0.454366667 | -0.0295      |
| FAM136A   | 0.4082       | 0.474133333 | 0.515266667 | 0.038533333  |
| B3GNT5    | 0.5295       | 0.558733333 | 0.545366667 | 0.102966667  |
| TMEM55A   | 0.056233333  | 0.143033333 | 0.314966667 | -0.307333333 |
| POLDIP3   | 0.407766667  | 0.442733333 | 0.3053      | -0.113333333 |

|              |              |              |              |              |
|--------------|--------------|--------------|--------------|--------------|
| LRRC1        | 0.287266667  | 0.110633333  | 0.295266667  | -0.293166667 |
| PINX1        | 0.378133333  | 0.406266667  | 0.5917       | -0.0056      |
| KIAA1731     | 0.1844       | 0.391166667  | 0.409266667  | -0.290166667 |
| GOLGA7       | 0.236966667  | 0.1856       | 0.4089       | -0.288133333 |
| ARHGAP15     | 0.218066667  | 0.492133333  | 0.181733333  | -0.150566667 |
| KLK3         | 0.3853       | 0.306966667  | 0.219333333  | -0.154766667 |
| TEAD4        | 0.578666667  | 0.592033333  | 0.455133333  | 0.0319       |
| NUP43        | 0.134933333  | 0.4036       | 0.315766667  | -0.2894      |
| PAICS        | 0.561666667  | 0.4048       | 0.475033333  | 0.005733333  |
| B3GNT6       | 0.043666667  | -0.023966667 | 0.085966667  | -0.4786      |
| MAP4K2       | 0.211566667  | 0.292433333  | 0.359733333  | -0.238066667 |
| AASDHPPT     | 0.301966667  | 0.420866667  | 0.3889       | -0.1267      |
| SFRS8        | 0.401333333  | 0.197333333  | 0.179633333  | -0.054866667 |
| TMEM67       | 0.573766667  | 0.2974       | 0.3197       | -0.192733333 |
| ATRN         | 0.184966667  | 0.118166667  | 0.021633333  | -0.370233333 |
| C14orf142    | 0.1914       | 0.3513       | 0.304466667  | -0.221533333 |
| HYLS1        | 0.652433333  | 0.478766667  | 0.205166667  | 0.012566667  |
| CGI-96       | 0.665366667  | 0.5641       | 0.425333333  | -0.0431      |
| LOC100132032 | 0.320866667  | 0.500933333  | 0.583566667  | -0.0905      |
| RBM28        | 0.608133333  | 0.576466667  | 0.2198       | 0.055733333  |
| VCP          | 0.3761       | 0.2193       | 0.335366667  | -0.160433333 |
| LOC729535    | 0.3905       | 0.440466667  | 0.412766667  | -0.072833333 |
| MCM5         | 0.514066667  | 0.5552       | 0.403966667  | -0.005266667 |
| SMARCD1      | 0.293033333  | 0.170833333  | 0.267766667  | -0.197333333 |
| LOC646993    | 0.435733333  | 0.390133333  | 0.321466667  | -0.220566667 |
| PARP10       | -0.0299      | 0.170933333  | 0.1645       | -0.332233333 |
| ANXA5        | 0.298533333  | 0.1357       | 0.258666667  | -0.1242      |
| EXOSC4       | 0.494866667  | 0.698466667  | 0.584        | 0.068433333  |
| LOC440349    | 0.041766667  | 0.210466667  | 0.238733333  | -0.422966667 |
| LMNB1        | 0.613933333  | 0.5941       | 0.5579       | 0.071266667  |
| GPD1L        | 0.3075       | 0.3102       | 0.418433333  | -0.217333333 |
| ANKRD36B     | 0.267766667  | 0.284233333  | 0.627466667  | -0.171466667 |
| LOC645166    | 0.424933333  | 0.425        | 0.238966667  | -0.158866667 |
| TBC1D24      | 0.405566667  | 0.245066667  | 0.334433333  | -0.185066667 |
| CRELD2       | 0.2204       | 0.444666667  | 0.246533333  | -0.245066667 |
| C10orf11     | -0.200966667 | -0.004833333 | 0.300833333  | -0.558633333 |
| LIPT1        | 0.048133333  | 0.214933333  | 0.279166667  | -0.317933333 |
| CXorf26      | 0.344866667  | 0.376933333  | 0.234433333  | -0.0261      |
| HOXC4        | 0.3487       | 0.240966667  | 0.2768       | -0.284333333 |
| ANGPT1       | 0.306466667  | 0.407866667  | 0.423033333  | -0.0781      |
| PDE1C        | 0.638566667  | 0.675266667  | -0.067166667 | -0.2736      |
| CDS2         | 0.232766667  | 0.349433333  | 0.182733333  | -0.224066667 |
| DOCK7        | 0.1579       | 0.3749       | 0.253966667  | -0.271266667 |
| G3BP2        | 0.2565       | 0.275566667  | 0.655933333  | -0.074133333 |
| GYG1         | 0.2499       | 0.2643       | 0.248866667  | -0.237766667 |
| CKAP5        | 0.490733333  | 0.424666667  | 0.363166667  | -0.043433333 |
| BFAR         | 0.0495       | 0.345566667  | 0.425366667  | -0.1378      |

|              |              |              |              |              |
|--------------|--------------|--------------|--------------|--------------|
| CTNNBIP1     | 0.5497       | 0.269466667  | 0.353466667  | -0.066166667 |
| FRAT2        | 0.036        | -0.0387      | 0.116733333  | -0.4914      |
| LMF2         | 0.207066667  | 0.085133333  | 0.099833333  | -0.4661      |
| SEMA4D       | 0.042133333  | 0.238533333  | 0.3779       | -0.305666667 |
| MYO10        | 0.200766667  | 0.341033333  | 0.370166667  | -0.1921      |
| BCL2A1       | 0.2849       | 0.593766667  | 0.6409       | 0.026766667  |
| ZBTB33       | 0.176766667  | 0.2255       | 0.482266667  | -0.207266667 |
| PPP1R3D      | 0.161233333  | 0.099933333  | 0.255433333  | -0.173166667 |
| MGC3731      | 0.418333333  | 0.659533333  | 0.323533333  | 0.064266667  |
| EIF2C2       | 0.529866667  | 0.637133333  | 0.538633333  | -0.0138      |
| VAT1         | -0.412233333 | -0.145166667 | 0.0497       | -0.645366667 |
| G3BP1        | 0.399833333  | 0.466333333  | 0.5221       | 0.005766667  |
| SNAI2        | 0.0651       | 0.085066667  | 0.059666667  | -0.354566667 |
| SESN1        | 0.307566667  | 0.1047       | 0.2902       | -0.2881      |
| DDRK1        | 0.1675       | 0.145933333  | 0.291633333  | -0.228533333 |
| TTC31        | 0.096        | 0.186233333  | 0.2249       | -0.310733333 |
| PRDX4        | 0.1211       | 0.139966667  | 0.094766667  | -0.307466667 |
| RCC1         | 0.672033333  | 0.528966667  | 0.509333333  | 0.046833333  |
| FLJ38973     | 0.4505       | 0.391733333  | 0.311966667  | -0.1555      |
| MAP3K10      | 0.132333333  | 0.186233333  | 0.3016       | -0.177333333 |
| ST3GAL5      | 0.263333333  | 0.6337       | 0.798333333  | 0.1433       |
| GAGE2E       | 0.458866667  | 0.213733333  | 0.296766667  | -0.178066667 |
| MRPL34       | 0.089433333  | 0.128        | 0.3734       | -0.384566667 |
| TFRC         | 0.4481       | 0.392466667  | 0.448666667  | 0.0292       |
| ABR          | -0.060866667 | 0.2012       | 0.267866667  | -0.335933333 |
| SGSM2        | 0.0044       | -0.039466667 | 0.181166667  | -0.5516      |
| ACOT1        | 0.068533333  | -0.083       | 0.1224       | -0.455466667 |
| C21orf34     | -0.0837      | -0.011266667 | -0.008733333 | -0.609733333 |
| CAD          | 0.198833333  | 0.287633333  | 0.298666667  | -0.213833333 |
| LOC100132139 | 0.341433333  | 0.254366667  | 0.082766667  | -0.210066667 |
| BRMS1L       | 0.363133333  | 0.186966667  | 0.356233333  | -0.153233333 |
| DDX39        | 0.615066667  | 0.5598       | 0.473966667  | 0.038433333  |
| KIF3A        | 0.128766667  | 0.290966667  | 0.3092       | -0.320766667 |
| ADIPOR2      | 0.1717       | 0.1467       | 0.41         | -0.205333333 |
| HOXB8        | 0.378233333  | 0.0729       | 0.307466667  | -0.165933333 |
| RAB11FIP3    | 0.262566667  | 0.313366667  | 0.3179       | -0.1228      |
| ZNF365       | 0.6086       | 0.544133333  | 0.573333333  | 0.143133333  |
| FLJ46906     | -0.104766667 | 0.1118       | 0.1446       | -0.4904      |
| PIGP         | 0.163066667  | 0.021466667  | 0.1905       | -0.374033333 |
| PRKDC        | 0.225733333  | 0.3238       | 0.5413       | -0.312133333 |
| INSIG1       | -0.002633333 | 0.2278       | 0.863833333  | 0.507633333  |
| LOC728969    | 0.280066667  | 0.144466667  | 0.287166667  | -0.1711      |
| ZNF285A      | 0.064266667  | 0.047533333  | 0.219533333  | -0.290566667 |
| PABPC1       | -0.0148      | 0.1138       | 0.286133333  | -0.390566667 |
| SRC          | 0.223266667  | 0.191366667  | 0.1351       | -0.3455      |
| LOC652726    | 0.354333333  | 0.333266667  | 0.675133333  | -0.2945      |
| PRMT7        | 0.294066667  | 0.3212       | 0.5077       | -0.131866667 |

|           |              |              |              |              |
|-----------|--------------|--------------|--------------|--------------|
| F2R       | 1.068333333  | 0.649133333  | -0.399066667 | -0.062       |
| LMNA      | 0.5617       | 0.376533333  | 0.2507       | -0.0954      |
| C8orf33   | 0.3539       | 0.137233333  | 0.123133333  | -0.174733333 |
| SPAST     | 0.215533333  | 0.140833333  | 0.143233333  | -0.409166667 |
| PPAN      | 0.7537       | 0.639933333  | 0.496966667  | 0.115966667  |
| LOC652545 | 0.4787       | 0.348666667  | 0.396333333  | -0.029633333 |
| PARK7     | 0.247533333  | 0.202566667  | 0.225533333  | -0.359866667 |
| FZD4      | 0.486766667  | 0.4632       | 0.357433333  | -0.062166667 |
| ARL9      | 0.360333333  | 0.433333333  | 0.408433333  | -0.010066667 |
| MCOLN1    | 0.007866667  | 0.077633333  | 0.219633333  | -0.3969      |
| C21orf66  | 0.524066667  | 0.458966667  | 0.329833333  | 0.005133333  |
| CERK      | 0.237366667  | 0.2458       | 0.211        | -0.212033333 |
| MAP1S     | 0.5768       | 0.564133333  | 0.4054       | 0.019466667  |
| TMEM164   | 0.370233333  | 0.439066667  | 0.576166667  | -0.0686      |
| ATL2      | 0.660866667  | 0.462266667  | 0.419466667  | -0.031233333 |
| AMMECR1L  | 0.326033333  | 0.322466667  | 0.288533333  | -0.150033333 |
| PRPF38A   | 0.433633333  | 0.585533333  | 0.388166667  | -0.08        |
| RBPMS2    | 0.304033333  | 0.367466667  | 0.600966667  | -0.178666667 |
| PQLC3     | -0.0559      | -0.015666667 | 0.325433333  | -0.451933333 |
| PLAT      | 0.5999       | 1.072466667  | 0.242666667  | -0.265466667 |
| CDKN3     | 0.611866667  | 0.5593       | 0.564066667  | -0.0034      |
| NLRX1     | 0.0715       | 0.169433333  | 0.379033333  | -0.296466667 |
| UQCRFS1   | 0.5647       | 0.558333333  | 0.4306       | 0.0061       |
| HLA-F     | -0.076033333 | 0.006033333  | 0.652        | -0.366633333 |
| PCM1      | 0.264633333  | 0.2006       | 0.138766667  | -0.323733333 |
| TIMELESS  | 0.4896       | 0.456733333  | 0.5091       | -0.053433333 |
| WT1       | 0.547933333  | 0.4194       | 0.512533333  | -0.042666667 |
| MRPS18A   | 0.1636       | 0.4048       | 0.273733333  | -0.144566667 |
| FKBP2     | 0.057266667  | 0.217333333  | 0.417533333  | -0.409       |
| PPIL5     | 0.630966667  | 0.6352       | 0.3279       | -0.004933333 |
| NMT2      | 0.113733333  | 0.315333333  | 0.467633333  | -0.295866667 |
| PRKRA     | 0.285533333  | 0.067266667  | 0.061233333  | -0.4255      |
| LOC728138 | 0.210233333  | 0.365766667  | 0.0967       | -0.326033333 |
| SMARCA4   | 0.4624       | 0.361566667  | 0.365433333  | -0.1147      |
| LOC285550 | 0.167066667  | 0.337466667  | 0.137466667  | -0.3363      |
| PLEKHB1   | 0.288966667  | 0.2125       | 0.5547       | -0.152666667 |
| C12orf5   | 0.4473       | 0.5254       | 0.593766667  | -0.0829      |
| AFG3L2    | 0.239        | 0.182233333  | 0.340266667  | -0.204633333 |
| BCOR      | 0.544366667  | 0.326433333  | 0.182033333  | -0.208566667 |
| FIBP      | 0.512        | 0.453966667  | 0.269633333  | -0.074066667 |
| QKI       | 0.326466667  | 0.194433333  | 0.156833333  | -0.320366667 |
| GPHN      | 0.288633333  | 0.3084       | 0.3252       | -0.203966667 |
| CD99      | 0.142166667  | 0.072633333  | 0.096066667  | -0.307733333 |
| KLHL29    | 0.2829       | 0.398333333  | 0.331566667  | -0.3127      |
| SIPA1     | 0.422466667  | 0.473833333  | 0.544566667  | -0.094566667 |
| PPT2      | 0.307233333  | 0.223266667  | 0.265766667  | -0.250266667 |
| LONRF2    | 0.3831       | 0.546733333  | 0.457866667  | -0.145966667 |

|              |              |             |              |              |
|--------------|--------------|-------------|--------------|--------------|
| TIMM44       | 0.257066667  | 0.131133333 | 0.050533333  | -0.297733333 |
| CARD16       | 0.001        | 0.213433333 | 0.4962       | -0.334733333 |
| ESRRA        | 0.191933333  | 0.405933333 | 0.373733333  | -0.181933333 |
| SETDB1       | 0.120233333  | 0.2041      | 0.4394       | -0.2206      |
| PDGFRL       | 0.192533333  | 0.182833333 | -0.056833333 | -0.593       |
| TULP4        | -0.038066667 | 0.162533333 | 0.2503       | -0.383       |
| SAP30        | 0.3973       | 0.140366667 | -0.027966667 | -0.374933333 |
| SMO          | 0.2869       | 0.267166667 | 0.190233333  | -0.341266667 |
| FAM125A      | 0.069733333  | 0.170733333 | 0.264466667  | -0.442333333 |
| TMED3        | 0.097033333  | 0.060266667 | 0.0338       | -0.462833333 |
| USE1         | -0.010766667 | 0.0893      | 0.123        | -0.486933333 |
| HLA-DQA1     | 0.204533333  | 0.1156      | 0.408466667  | -0.312766667 |
| MTDH         | 0.3345       | 0.548066667 | 0.3106       | -0.061166667 |
| USP21        | 0.065966667  | 0.275866667 | 0.874533333  | -0.206966667 |
| AGAP3        | 0.2369       | 0.343666667 | 0.430566667  | -0.126566667 |
| BCAN         | 0.611666667  | 0.5421      | 0.515533333  | -0.0073      |
| NCAPH2       | 0.573733333  | 0.4428      | 0.287733333  | -0.1102      |
| TIMP2        | 0.098733333  | 0.087066667 | 0.1516       | -0.485833333 |
| ZBTB24       | 0.118366667  | 0.112666667 | 0.114266667  | -0.490566667 |
| LOC407835    | 0.224033333  | 0.186366667 | 0.1196       | -0.3036      |
| SPR          | 0.2061       | 0.1036      | 0.302366667  | -0.4056      |
| KIAA0922     | 0.2396       | 0.159333333 | 0.313166667  | -0.2636      |
| 8-Sep        | 0.222666667  | 0.167266667 | 0.378033333  | -0.353233333 |
| LOC651576    | 0.326833333  | 0.333633333 | 0.218566667  | -0.222066667 |
| MAZ          | 0.041433333  | 0.0334      | 0.232466667  | -0.4748      |
| DNMT1        | 0.627833333  | 0.528433333 | 0.469433333  | -0.03        |
| MTFR1        | 0.392633333  | 0.297466667 | 0.423066667  | -0.1655      |
| CARM1        | 0.377833333  | 0.352333333 | 0.305766667  | -0.311966667 |
| LOC100128221 | -0.017366667 | 0.192866667 | 0.218266667  | -0.260066667 |
| WDR33        | 0.437166667  | 0.235866667 | 0.4331       | -0.2066      |
| PSMB4        | 0.1917       | 0.2596      | 0.431666667  | -0.213533333 |
| TMEM117      | 0.289666667  | 0.09        | 0.399333333  | -0.410766667 |
| MYO9B        | 0.1977       | 0.239366667 | 0.344766667  | -0.3386      |
| 2-Sep        | 0.0739       | 0.117166667 | 0.1048       | -0.3776      |
| ZBED1        | 0.225133333  | 0.244       | 0.1872       | -0.293266667 |
| NEUROG2      | 0.255066667  | 0.505066667 | 0.412233333  | -0.0964      |
| ZNF827       | 0.440633333  | 0.342166667 | 0.134333333  | -0.213333333 |
| NAPEPLD      | 0.038066667  | 0.1204      | 0.311166667  | -0.4208      |
| SDHB         | 0.4821       | 0.399633333 | 0.3609       | -0.1138      |
| SLC39A3      | 0.145933333  | 0.112666667 | 0.090033333  | -0.4378      |
| GRB10        | 0.0312       | -0.0744     | 0.050566667  | -0.549766667 |
| IMPDH1       | 0.5605       | 0.4227      | 0.230366667  | -0.049533333 |
| PARP1        | 0.2582       | 0.3508      | 0.441233333  | -0.2015      |
| LEPREL2      | 0.232966667  | 0.3371      | 0.407466667  | -0.234433333 |
| GIMAP2       | -0.007566667 | 0.189633333 | 0.079        | -0.414966667 |
| PIP5K1C      | 0.187466667  | 0.277966667 | 0.256233333  | -0.300233333 |
| LPCAT3       | 0.059566667  | 0.121866667 | 0.192233333  | -0.4318      |

|              |              |              |              |              |
|--------------|--------------|--------------|--------------|--------------|
| MAPRE2       | 0.170633333  | 0.1507       | 0.2431       | -0.438433333 |
| WDR12        | 0.531233333  | 0.543533333  | 0.483566667  | 0.013166667  |
| KCTD9        | 0.655433333  | 0.441966667  | 0.205566667  | -0.050966667 |
| ACSL3        | 0.215466667  | 0.3188       | 0.5796       | -0.083366667 |
| PPT1         | 0.249533333  | 0.172466667  | 0.243966667  | -0.350233333 |
| C2orf79      | 0.236866667  | 0.1922       | 0.3174       | -0.317566667 |
| RAB15        | 0.271633333  | 0.134366667  | 0.2511       | -0.362866667 |
| PPM1H        | -0.1269      | 0.052966667  | 0.170433333  | -0.468533333 |
| BAZ1A        | 0.499933333  | 0.423466667  | 0.4412       | -0.033866667 |
| ABCB10       | 0.2518       | 0.2232       | 0.397866667  | -0.199866667 |
| GNG2         | 0.412533333  | 0.3902       | 0.223066667  | -0.280933333 |
| GSTZ1        | 0.0525       | 0.121233333  | 0.235766667  | -0.3353      |
| C16orf58     | 0.086633333  | 0.016266667  | 0.127033333  | -0.495333333 |
| ASXL2        | 0.300966667  | 0.289666667  | 0.213366667  | -0.363433333 |
| RPP25        | 0.2499       | 0.285566667  | 0.3705       | -0.2217      |
| RAI1         | 0.320733333  | 0.136766667  | 0.276533333  | -0.2524      |
| LETMD1       | -0.022766667 | -0.0034      | 0.175666667  | -0.289866667 |
| TAF6L        | 0.068233333  | 0.118566667  | 0.0265       | -0.282466667 |
| C4orf18      | 0.019066667  | -0.073366667 | -0.209833333 | -0.550966667 |
| OXA1L        | 0.035333333  | 0.036133333  | 0.3785       | -0.3075      |
| SLC25A19     | 0.5354       | 0.8238       | 0.676666667  | 0.096333333  |
| PLSCR1       | 0.1522       | 0.503833333  | 0.600966667  | -0.148966667 |
| ADSS         | 0.433933333  | 0.463633333  | 0.3783       | -0.128866667 |
| OAT          | 0.426566667  | 0.326533333  | 0.4936       | -0.124966667 |
| KBTBD9       | 0.3571       | 0.474433333  | 0.645166667  | -0.0422      |
| ENSA         | 0.2815       | 0.1206       | 0.1462       | -0.4172      |
| FBXO32       | -0.5902      | -0.4908      | 0.015266667  | -0.784566667 |
| LOC100133469 | 0.2747       | 0.2908       | 0.180166667  | -0.2814      |
| ADSL         | 0.2994       | 0.335566667  | 0.287533333  | -0.277566667 |
| HERC5        | 0.040166667  | 0.163766667  | 0.510766667  | -0.229766667 |
| CGN          | 0.479933333  | 0.247533333  | 0.3383       | -0.232466667 |
| CSRP1        | 0.384566667  | 0.546233333  | 0.866866667  | 0.0209       |
| POLR3K       | 0.6607       | 0.544733333  | 0.494        | 0.038866667  |
| SLC25A5      | 0.2753       | 0.332133333  | 0.395266667  | -0.235966667 |
| LOC400506    | 0.480866667  | 0.312633333  | 0.3057       | -0.297133333 |
| PIGY         | 0.067233333  | 0.1177       | 0.3608       | -0.384066667 |
| HINT2        | -0.1077      | 0.098366667  | 0.035433333  | -0.4682      |
| PDHA1        | 0.417033333  | 0.387733333  | 0.4159       | -0.115333333 |
| OXR1         | 0.0682       | 0.1072       | 0.371266667  | -0.355233333 |
| KLHL21       | 0.131966667  | 0.1399       | 0.032433333  | -0.372066667 |
| RAD21        | 0.500166667  | 0.4468       | 0.202266667  | -0.265       |
| C14orf173    | 0.2124       | 0.164766667  | 0.233433333  | -0.3831      |
| LAMP2        | 0.095866667  | -0.276866667 | -0.0227      | -0.7087      |
| ACACB        | 0.001966667  | 0.104366667  | 0.2846       | -0.4114      |
| SPCS3        | 0.457733333  | 0.562333333  | 0.543833333  | -0.076333333 |
| TNIK         | 0.352466667  | 0.742433333  | 0.487533333  | 0.026866667  |
| ATP5S        | 0.1095       | 0.253066667  | 0.1748       | -0.3363      |

|              |              |             |             |              |
|--------------|--------------|-------------|-------------|--------------|
| NDRG2        | 0.105166667  | 0.1514      | 0.229133333 | -0.3597      |
| KIAA0020     | 0.629633333  | 0.6683      | 0.493566667 | -0.0055      |
| SLC25A29     | 0.232233333  | 0.2377      | 0.388133333 | -0.336366667 |
| C11orf80     | 0.240933333  | 0.2527      | 0.216133333 | -0.344466667 |
| ATP5G3       | 0.377566667  | 0.551366667 | 0.6063      | -0.102333333 |
| LOC100129933 | 0.6152       | 0.613533333 | 0.493666667 | -0.088833333 |
| TMEM147      | 0.063366667  | 0.021733333 | 0.163       | -0.490266667 |
| RNF138       | 0.436033333  | 0.577666667 | 0.6153      | -0.067566667 |
| VDAC3        | 0.558066667  | 0.439833333 | 0.411233333 | -0.013666667 |
| ALG8         | 0.1299       | 0.454933333 | 0.463666667 | -0.2676      |
| CPOX         | 0.377766667  | 0.3381      | 0.430966667 | -0.252466667 |
| IRX5         | 0.4557       | 0.376033333 | 0.284466667 | -0.1404      |
| SEC11C       | 0.323033333  | 0.242666667 | 0.353633333 | -0.134766667 |
| FZD7         | 0.181733333  | 0.253366667 | 0.457       | -0.309333333 |
| PCDHGC3      | 0.306366667  | 0.209566667 | 0.194166667 | -0.307733333 |
| ATP6V1E1     | 0.2803       | 0.213333333 | 0.099933333 | -0.3614      |
| C2CD2        | 0.130933333  | 0.273066667 | 0.579633333 | -0.171566667 |
| ARL6IP1      | 0.6953       | 0.505633333 | 0.465766667 | 0.0114       |
| TMEM118      | 0.3536       | 0.3353      | 0.488066667 | -0.3298      |
| LOC100129866 | 0.320833333  | 0.3169      | 0.477733333 | -0.168033333 |
| PRDX2        | 0.182166667  | 0.2399      | 0.184333333 | -0.387266667 |
| ENOPH1       | 0.406966667  | 0.266       | 0.448233333 | -0.156666667 |
| OAF          | 0.166633333  | 0.596       | 0.461966667 | -0.124233333 |
| FEN1         | 0.5897       | 0.709533333 | 0.6577      | 0.198833333  |
| SOX4         | -0.059666667 | 0.018933333 | 0.248066667 | -0.415166667 |
| MELK         | 0.6202       | 0.595666667 | 0.473466667 | 0.093233333  |
| PTDSS1       | 0.460266667  | 0.517333333 | 0.493866667 | -0.039733333 |
| CDC16        | 0.155566667  | 0.208233333 | 0.586733333 | -0.276033333 |
| C20orf108    | 0.313166667  | 0.045233333 | -0.0267     | -0.473666667 |
| FZD3         | 0.118133333  | 0.131533333 | 0.1432      | -0.514633333 |
| CEP70        | 0.2279       | 0.4186      | 0.356933333 | -0.3067      |
| NTHL1        | 0.349333333  | 0.375266667 | 0.396166667 | -0.286133333 |
| NRBP2        | -0.0783      | 0.127333333 | 0.541166667 | -0.354166667 |
| DERA         | 0.092533333  | 0.217       | 0.822966667 | -0.238966667 |
| ZNF585A      | 0.285566667  | 0.421466667 | 0.3997      | -0.123766667 |
| BCL9         | 0.174666667  | 0.4083      | 0.259       | -0.355433333 |
| CALD1        | 0.739566667  | 0.398233333 | 0.109233333 | -0.111966667 |
| C22orf25     | -0.008033333 | 0.097533333 | 0.3316      | -0.315966667 |
| MR1          | -0.046766667 | 0.0117      | 0.250633333 | -0.517133333 |
| MFSD3        | -0.111733333 | 0.038766667 | 0.544533333 | -0.5893      |
| AUP1         | 0.488833333  | 0.250533333 | 0.452966667 | -0.1209      |
| STXBP5       | 0.103866667  | 0.2164      | 0.349533333 | -0.352566667 |
| DDX49        | 0.3354       | 0.473333333 | 0.108866667 | -0.1247      |
| SLC35F1      | 0.342433333  | 0.587166667 | 0.419833333 | -0.149466667 |
| C12orf11     | 0.356733333  | 0.5737      | 0.3439      | -0.1888      |
| BEND5        | 0.248266667  | 0.0741      | -0.0226     | -0.584933333 |
| FMNL2        | 0.4485       | 0.562       | 0.541866667 | -0.188066667 |

|              |              |              |              |              |
|--------------|--------------|--------------|--------------|--------------|
| NT5C3L       | 0.147933333  | 0.1694       | 0.215133333  | -0.3522      |
| FIP1L1       | 0.576466667  | 0.5927       | 0.5768       | 0.020166667  |
| PPFIA1       | 0.316933333  | 0.186733333  | 0.298033333  | -0.274266667 |
| NPAT         | 0.1677       | 0.602233333  | 0.617833333  | -0.230066667 |
| FRAS1        | 0.064133333  | 0.018366667  | 0.532333333  | -0.431333333 |
| NCAPD3       | 0.5035       | 0.519933333  | 0.653166667  | -0.130466667 |
| FLJ38482     | 0.0877       | 0.072466667  | 0.151666667  | -0.370433333 |
| RNF19A       | 0.2625       | 0.1785       | 0.501066667  | -0.092333333 |
| PLXDC2       | 0.059166667  | 0.104666667  | -0.056733333 | -0.468733333 |
| PUS7         | 0.6173       | 0.562666667  | 0.476166667  | -0.057533333 |
| ID2          | -0.569733333 | -0.376333333 | -0.1916      | -1.436133333 |
| SFRS2B       | 0.173433333  | 0.201333333  | 0.103433333  | -0.4602      |
| DCP2         | 0.544033333  | 0.313766667  | 0.6407       | -0.038033333 |
| APOC1        | 0.248033333  | 0.309933333  | 0.438166667  | -0.3314      |
| ALKBH2       | 0.3379       | 0.416233333  | 0.367733333  | -0.286133333 |
| AKR7A3       | 0.046766667  | 0.320433333  | 0.308066667  | -0.434966667 |
| ENHO         | 0.220666667  | 0.244133333  | 0.373966667  | -0.408766667 |
| CLMN         | 0.378233333  | 0.523266667  | 0.4915       | -0.031       |
| EVL          | 0.164366667  | 0.408466667  | 0.734166667  | -0.180466667 |
| ACAT1        | 0.167366667  | 0.322266667  | 0.363466667  | -0.2965      |
| VEGFB        | -0.110233333 | -0.0254      | 0.246733333  | -0.56        |
| WARS         | -0.228533333 | -0.185366667 | 0.160366667  | -0.6143      |
| ZNF682       | 0.417766667  | 0.730633333  | 0.824766667  | -0.043633333 |
| ZNF295       | 0.007266667  | 0.2106       | 0.393066667  | -0.386       |
| LAD1         | 0.316433333  | 0.4751       | 0.841366667  | -0.119833333 |
| SFT2D2       | 0.363633333  | 0.52         | 0.517566667  | -0.181366667 |
| SUOX         | 0.129666667  | 0.2357       | 0.3773       | -0.341633333 |
| DLAT         | 0.595133333  | 0.336933333  | 0.396666667  | -0.0471      |
| GCDH         | 0.174466667  | 0.1938       | 0.1571       | -0.453066667 |
| COPS8        | 0.282766667  | 0.369966667  | 0.2205       | -0.314366667 |
| TUBB3        | 0.510833333  | 0.534933333  | 0.3773       | -0.0607      |
| UBE4B        | 0.1587       | 0.165333333  | 0.057866667  | -0.4474      |
| TIAM1        | 0.4176       | 0.347666667  | 0.4203       | -0.3324      |
| C16orf35     | 0.3326       | 0.4096       | 0.3525       | -0.3411      |
| AMDHD2       | 0.129533333  | 0.024833333  | 0.5535       | -0.3042      |
| SPATA6       | 0.4199       | 0.2263       | 0.291833333  | -0.287333333 |
| LOC100133565 | 0.3805       | 0.6202       | -0.381866667 | -0.730966667 |
| TMED10P      | 0.2665       | 0.179266667  | 0.229366667  | -0.316966667 |
| CNFN         | 0.089233333  | 0.259        | 0.381333333  | -0.451666667 |
| ANKRD50      | 0.486233333  | 0.329533333  | 0.4639       | -0.0276      |
| TUBB2A       | 0.601866667  | 0.5012       | 0.3292       | -0.2518      |
| TMEM97       | 0.263866667  | 0.523966667  | 0.790133333  | 0.050533333  |
| ZYG11B       | 0.1969       | 0.075966667  | 0.248433333  | -0.488733333 |
| TCEAL4       | 0.0466       | 0.0889       | 0.224233333  | -0.452666667 |
| COL7A1       | 0.1521       | 0.5599       | 1.0039       | 0.078733333  |
| LOC388588    | -0.2008      | 0.0871       | 0.355566667  | -0.650733333 |
| MTR          | 0.399566667  | 0.330633333  | 0.3223       | -0.301333333 |



|           |              |             |             |              |
|-----------|--------------|-------------|-------------|--------------|
| LIG3      | 0.3323       | 0.341133333 | 0.3861      | -0.294666667 |
| FANCL     | 0.111966667  | 0.512833333 | 0.622266667 | -0.288166667 |
| RPS6KA1   | 0.478        | 0.443966667 | 0.477333333 | -0.0107      |
| FAM118A   | 0.133733333  | 0.099733333 | 0.4611      | -0.332633333 |
| FCGR2A    | 0.3522       | 0.331366667 | 0.630566667 | -0.154433333 |
| NR2C2AP   | 0.2959       | 0.723733333 | 0.695766667 | -0.033233333 |
| GMDS      | 0.002566667  | 0.0671      | 0.3017      | -0.445733333 |
| AGTPBP1   | 0.176533333  | 0.1787      | 0.3419      | -0.3786      |
| SIDT2     | -0.051066667 | 0.0209      | -0.0112     | -0.6955      |
| GNPDA1    | -0.047466667 | 0.1599      | 0.380866667 | -0.390833333 |
| DCPS      | 0.6591       | 0.4981      | 0.195033333 | -0.1766      |
| RDH10     | 0.979266667  | 0.6148      | 0.063566667 | 0.041133333  |
| TFAP2A    | 0.221366667  | 0.053133333 | 0.399066667 | -0.2454      |
| PPPDE2    | 0.496366667  | 0.546233333 | 0.433233333 | -0.1305      |
| RERE      | 0.246433333  | 0.2074      | 0.316866667 | -0.368       |
| HPS4      | 0.0426       | 0.115166667 | 0.4767      | -0.3179      |
| MRE11A    | 0.522266667  | 0.417833333 | 0.4621      | -0.199       |
| CBS       | 0.0535       | -0.0219     | -0.2941     | -0.662366667 |
| STK11IP   | 0.486233333  | 0.3055      | 0.166       | -0.194466667 |
| LOC729978 | 0.074466667  | 0.149733333 | 0.339266667 | -0.529933333 |
| LCLAT1    | 0.4485       | 0.584866667 | 0.5485      | -0.068433333 |
| PIGA      | 0.433133333  | 0.278766667 | 0.498333333 | -0.203666667 |
| TMEM144   | 0.109966667  | 0.31        | 0.481233333 | -0.338633333 |
| IL27RA    | 0.665966667  | 0.692766667 | 0.453133333 | -0.0006      |
| PPP1R13B  | 0.217633333  | 0.243833333 | 0.367266667 | -0.239833333 |
| HABP4     | 0.111166667  | 0.0823      | 0.023633333 | -0.411966667 |
| SRPK2     | -0.150833333 | 0.0473      | 0.259566667 | -0.502066667 |
| PGM1      | 0.237966667  | 0.293166667 | 0.474533333 | -0.322       |
| SDHD      | 0.224433333  | 0.312233333 | 0.2293      | -0.505466667 |
| GPC6      | 0.296466667  | 0.1742      | 0.2573      | -0.324433333 |
| MOAP1     | 0.178333333  | 0.210433333 | 0.503166667 | -0.364433333 |
| ALG3      | 0.520133333  | 0.3045      | 0.678366667 | -0.0958      |
| TMX4      | 0.5713       | 0.626666667 | 0.626       | -0.1161      |
| C14orf149 | 0.642933333  | 0.705533333 | 0.283633333 | -0.0125      |
| GGA2      | 0.149233333  | 0.095233333 | 0.382833333 | -0.348233333 |
| AHCY      | 0.255566667  | 0.2606      | 0.361566667 | -0.264566667 |
| OPA1      | 0.3894       | 0.329333333 | 0.428533333 | -0.2512      |
| CCNF      | 0.767666667  | 0.609233333 | 0.497766667 | 0.123133333  |
| TMEM109   | 0.594066667  | 0.577666667 | 0.431633333 | -0.145433333 |
| ZNF525    | 0.140266667  | 0.3921      | 0.3593      | -0.3301      |
| EPHB4     | 0.363433333  | 0.3414      | 0.0345      | -0.465966667 |
| ZNF828    | 0.540833333  | 0.688166667 | 0.838       | 0.124166667  |
| C8orf40   | -0.023633333 | 0.0844      | 0.149633333 | -0.520533333 |
| STOM      | 0.0767       | 0.264       | 0.8385      | -0.1263      |
| HSPC159   | 0.674033333  | 0.402333333 | 0.445433333 | -0.1112      |
| SPATA13   | 0.393933333  | 0.6225      | 0.576833333 | -0.0785      |
| LPXN      | 0.646133333  | 0.599733333 | 0.878266667 | 0.205066667  |

|              |              |             |             |              |
|--------------|--------------|-------------|-------------|--------------|
| SLC22A18     | -0.189533333 | 0.1338      | 0.537933333 | -0.6022      |
| C9orf100     | 0.3986       | 0.502833333 | 0.645166667 | -0.0947      |
| CENPA        | 0.9092       | 0.491333333 | 0.5164      | 0.0826       |
| PCSK5        | 0.2685       | 0.4027      | 0.262166667 | -0.319833333 |
| ATAD2        | 0.6727       | 0.568933333 | 0.653833333 | 0.029233333  |
| LOC643272    | 0.2882       | 0.208466667 | 0.640733333 | -0.321333333 |
| ISYNA1       | 0.143566667  | 0.155366667 | 0.3154      | -0.506733333 |
| GTSE1        | 0.773066667  | 0.6108      | 0.507833333 | 0.1522       |
| CPS1         | -0.112       | 0.075233333 | 0.250366667 | -0.575166667 |
| STAG2        | 0.310366667  | 0.1584      | 0.4881      | -0.2791      |
| ZFYVE16      | 0.008333333  | 0.215866667 | 0.6083      | -0.432766667 |
| DUSP10       | 0.170233333  | 0.151733333 | 0.092066667 | -0.537366667 |
| NCRNA00092   | 0.307633333  | 0.353966667 | 0.591133333 | -0.353566667 |
| FASTKD1      | 0.455766667  | 0.639733333 | 0.718966667 | -0.028566667 |
| CHPT1        | 0.138766667  | 0.119366667 | 0.304633333 | -0.616166667 |
| ROCK2        | 0.556966667  | 0.7748      | 0.365633333 | -0.130166667 |
| NP           | 0.732333333  | 0.789166667 | 0.5356      | 0.0345       |
| KHSRP        | 0.5624       | 0.525533333 | 0.667033333 | -0.001266667 |
| DUS3L        | 0.546366667  | 0.3996      | 0.4331      | -0.085566667 |
| PLEKHA1      | 0.292633333  | 0.164266667 | 0.2416      | -0.518666667 |
| PPFIBP1      | 0.467966667  | 0.455333333 | 0.337066667 | -0.276366667 |
| CD9          | 0.444433333  | 0.344       | 0.148233333 | -0.271833333 |
| POLR2F       | 0.411833333  | 0.5376      | 0.535433333 | -0.0875      |
| MCCC1        | 0.0023       | 0.144633333 | 0.424733333 | -0.467833333 |
| PCMT1        | 0.212433333  | 0.148133333 | 0.313133333 | -0.392966667 |
| PBK          | 0.701866667  | 0.517       | 0.6903      | -0.0446      |
| TTC38        | 0.4519       | 0.3006      | 0.2792      | -0.2292      |
| KCTD15       | -0.029066667 | 0.035066667 | 0.1318      | -0.6646      |
| MCC          | 0.223033333  | 0.301433333 | 0.049       | -0.587166667 |
| EPHA3        | 0.415933333  | 0.507966667 | 0.815866667 | -0.0518      |
| ATP6V1C1     | 0.256533333  | 0.155166667 | 0.4486      | -0.311133333 |
| HRASLS3      | -0.179366667 | 0.0174      | 0.367966667 | -0.714166667 |
| POLA1        | 0.559033333  | 0.518466667 | 0.606366667 | -0.081966667 |
| LOC100134364 | 0.247533333  | 0.525666667 | -0.282      | -0.778133333 |
| SLC35A2      | 0.044133333  | 0.3015      | 0.215133333 | -0.468033333 |
| IFFO1        | 0.1783       | 0.266466667 | 0.443633333 | -0.2837      |
| ME2          | 0.4987       | 0.487066667 | 0.580633333 | -0.1502      |
| EXOSC10      | 0.491933333  | 0.312633333 | 0.3624      | -0.157833333 |
| C19orf12     | 0.158166667  | 0.1875      | 0.179366667 | -0.466166667 |
| CHEK2        | 0.5036       | 0.660166667 | 0.651266667 | -0.0622      |
| UBL3         | 0.2764       | 0.375933333 | 0.746033333 | -0.2197      |
| DIAPH2       | 0.4255       | 0.536366667 | 0.6192      | -0.1127      |
| MESP1        | 0.115533333  | 0.427433333 | 0.7648      | -0.3933      |
| DLL3         | 0.275766667  | 0.3815      | 0.426466667 | -0.2847      |
| ZNF280B      | 0.178633333  | 0.3435      | 0.4693      | -0.329133333 |
| FYN          | 0.1531       | 0.237133333 | 0.356733333 | -0.614966667 |
| MTERFD1      | 0.475066667  | 0.616366667 | 0.572366667 | -0.165266667 |

|           |              |             |              |              |
|-----------|--------------|-------------|--------------|--------------|
| HK2       | 0.036566667  | 0.176       | 0.3853       | -0.460966667 |
| DDT       | 0.244866667  | 0.2491      | 0.384366667  | -0.392366667 |
| ZNF714    | 0.618566667  | 0.5454      | 0.629        | -0.064666667 |
| LOC441763 | 0.626366667  | 0.5757      | -0.108366667 | -0.474666667 |
| FOXO1     | 0.3451       | 0.280666667 | 0.493066667  | -0.2395      |
| LOC729559 | 0.149866667  | 0.1383      | 0.1971       | -0.551166667 |
| FEM1C     | 0.2607       | 0.4687      | 0.737866667  | -0.0979      |
| PLOD3     | 0.2373       | 0.232533333 | 0.136866667  | -0.461033333 |
| LRP12     | 0.744        | 0.620166667 | 0.4436       | 0.042966667  |
| PKP4      | 0.2104       | 0.3397      | 0.344233333  | -0.4381      |
| ZCCHC17   | 0.481533333  | 0.549033333 | 0.535433333  | -0.124933333 |
| CTSZ      | 0.168166667  | -0.0076     | 0.2196       | -0.461333333 |
| CPSF1     | 0.1206       | 0.187266667 | 0.142033333  | -0.554366667 |
| MDH1      | 0.271666667  | 0.4117      | 0.582133333  | -0.2574      |
| LOC346887 | 0.569633333  | 0.664066667 | 0.515633333  | -0.0573      |
| C22orf9   | -0.109666667 | 0.0185      | 0.260766667  | -0.613333333 |
| MRPL35    | 0.466666667  | 0.6368      | 0.655666667  | -0.010166667 |
| NR4A2     | 0.501266667  | 0.2649      | 0.2387       | -0.344933333 |
| CABC1     | -0.222866667 | 0.067866667 | 0.385233333  | -0.6256      |
| PRPS2     | 0.533433333  | 0.540733333 | 0.669566667  | -0.037766667 |
| THEM4     | 0.4892       | 0.5455      | 0.7172       | 0.0017       |
| F12       | 0.415        | 0.498466667 | 0.612433333  | -0.187033333 |
| ARMCX5    | 0.4382       | 0.457733333 | 0.1648       | -0.262966667 |
| PACSIN2   | 0.5607       | 0.396866667 | 0.4609       | -0.262533333 |
| AIP       | -0.012433333 | 0.166566667 | 0.194133333  | -0.562366667 |
| MTHFD1    | 0.561        | 0.555966667 | 0.677666667  | -0.059233333 |
| MYLC2PL   | 0.213066667  | 0.3167      | 0.519566667  | -0.333433333 |
| CECR5     | 0.391833333  | 0.4844      | 0.482566667  | -0.249966667 |
| C1orf188  | 0.2182       | 0.217233333 | 0.2895       | -0.5293      |
| CAPS      | -0.0415      | 0.267       | 0.561133333  | -0.445866667 |
| ERMP1     | 0.123933333  | 0.150733333 | 0.564766667  | -0.397566667 |
| LY96      | -0.036166667 | 0.0363      | 0.1424       | -0.559433333 |
| C8orf38   | 0.498166667  | 0.2664      | 0.302533333  | -0.2741      |
| HSD17B11  | 0.1897       | 0.314866667 | 0.422166667  | -0.476366667 |
| KIAA1737  | 0.3338       | 0.1197      | 0.240033333  | -0.3454      |
| SCARB2    | 0.174633333  | 0.174033333 | 0.142        | -0.448466667 |
| LOC497256 | 0.5648       | 0.389633333 | 0.3376       | -0.277733333 |
| LOC649009 | 0.584266667  | 0.399733333 | 0.374066667  | -0.280966667 |
| HNRNPA3   | 0.589033333  | 0.366733333 | 0.660966667  | -0.171566667 |
| ASRGL1    | 0.255166667  | 0.462833333 | 0.360766667  | -0.362066667 |
| TTL       | 0.492333333  | 0.311366667 | 0.369666667  | -0.283466667 |
| LOC644761 | 0.385066667  | 0.3605      | 0.514733333  | -0.2327      |
| NMNAT1    | 0.2366       | 0.3777      | 0.339133333  | -0.282566667 |
| C1orf93   | 0.163866667  | 0.1827      | 0.174833333  | -0.500933333 |
| AHNAK     | 0.405866667  | 0.312866667 | 0.484233333  | -0.347133333 |
| MRPL16    | 0.4691       | 0.596       | 0.502566667  | -0.119766667 |
| RSL1D1    | 0.465733333  | 0.473833333 | 0.460066667  | -0.2789      |

|           |              |             |              |              |
|-----------|--------------|-------------|--------------|--------------|
| ZNF330    | 0.103733333  | 0.155833333 | 0.316166667  | -0.493866667 |
| LZIC      | 0.2986       | 0.5257      | 0.175766667  | -0.277766667 |
| GDPD5     | 0.105966667  | 0.389       | 0.7103       | -0.298466667 |
| SH3BP1    | 0.7323       | 0.5898      | 0.3996       | -0.1771      |
| ESRRAP2   | 0.2437       | 0.408366667 | 0.587466667  | -0.2317      |
| GALT      | 0.060366667  | 0.147733333 | 0.267033333  | -0.4715      |
| CCNE2     | 0.538233333  | 0.812866667 | 0.7385       | -0.032766667 |
| C6orf168  | 0.4803       | 0.564033333 | 0.697966667  | -0.079266667 |
| S100A10   | 0.445866667  | 0.3996      | 0.304833333  | -0.1719      |
| ACP6      | 0.465233333  | 0.6348      | 0.470133333  | -0.213233333 |
| AKAP11    | 0.210633333  | 0.2895      | 0.6263       | -0.2997      |
| TLE1      | 0.286733333  | 0.166266667 | 0.181266667  | -0.439633333 |
| CBX2      | 0.452        | 0.258       | 0.3274       | -0.332233333 |
| TGDS      | 0.151333333  | 0.288       | 0.430233333  | -0.421166667 |
| BPHL      | 0.033866667  | 0.087666667 | 0.273066667  | -0.5664      |
| KIF4A     | 0.614466667  | 0.655866667 | 0.563        | -0.069033333 |
| ABHD3     | 0.622666667  | 0.650333333 | 0.535433333  | -0.1661      |
| WDR5      | 0.477833333  | 0.3673      | 0.490733333  | 0.0005       |
| CD63      | 0.243566667  | 0.056166667 | 0.561733333  | -0.243133333 |
| RNASET2   | -0.080566667 | 0.0142      | 0.158066667  | -0.629133333 |
| NUP160    | 0.5462       | 0.527966667 | 0.522133333  | -0.1386      |
| PHF16     | 0.377033333  | 0.309533333 | 0.439933333  | -0.274366667 |
| GEMIN6    | 0.4862       | 0.695266667 | 0.686933333  | 0.029333333  |
| INTS9     | 0.291333333  | 0.688933333 | 0.9055       | -0.053966667 |
| CDCA7     | 0.668733333  | 1.103566667 | 0.990366667  | -0.032866667 |
| KLHL22    | -0.164666667 | 0.0615      | 0.343033333  | -0.5443      |
| SARS2     | 0.360033333  | 0.208666667 | 0.325        | -0.311466667 |
| HDDC2     | 0.152033333  | 0.239233333 | 0.218        | -0.392533333 |
| E124      | 0.2807       | 0.390766667 | 0.435366667  | -0.183566667 |
| EXD2      | 0.064266667  | 0.146466667 | 0.071566667  | -0.5735      |
| CLCC1     | 0.780733333  | 0.623266667 | 0.458533333  | -0.14        |
| LOC23117  | 0.1766       | 0.259633333 | 0.389666667  | -0.5098      |
| LOC728014 | 0.353533333  | 0.3111      | 0.834133333  | -0.145833333 |
| ZNF816A   | 0.310666667  | 0.384833333 | 0.4301       | -0.2353      |
| ZNF503    | 0.0527       | 0.443766667 | 0.656533333  | -0.2711      |
| ZNF788    | 0.750366667  | 0.467433333 | 0.3092       | -0.245866667 |
| CAMK2D    | 0.310833333  | 0.602933333 | 0.329        | -0.3478      |
| LRPAP1    | -0.060833333 | 0.005166667 | 0.216433333  | -0.617666667 |
| TMEM8     | 0.045033333  | 0.1647      | 0.3541       | -0.535766667 |
| HSPC157   | 0.0779       | 0.2302      | 0.269533333  | -0.5049      |
| MTP18     | 0.8664       | 0.6079      | 0.717633333  | 0.048466667  |
| FARP1     | 0.072033333  | 0.443233333 | 0.691166667  | -0.404533333 |
| LOC253039 | 0.135233333  | 0.024866667 | 0.0606       | -0.566633333 |
| COX7B2    | 0.437466667  | 0.5167      | 0.543366667  | -0.197933333 |
| SYNGR1    | 0.006666667  | 0.3548      | 0.6425       | -0.569633333 |
| ZC3H11B   | 0.128333333  | 0.470966667 | 0.6782       | -0.2843      |
| LOC285047 | 0.245433333  | 0.334566667 | -0.118933333 | -0.5633      |

|              |              |              |              |              |
|--------------|--------------|--------------|--------------|--------------|
| SMPDL3A      | 0.042066667  | 0.105066667  | 0.393966667  | -0.464633333 |
| ATG4B        | 0.3536       | 0.142633333  | 0.542533333  | -0.335133333 |
| PTTG1IP      | 0.170766667  | 0.265        | 0.493        | -0.347266667 |
| ILVBL        | 0.128066667  | 0.0853       | 0.324633333  | -0.568066667 |
| ADCY3        | 0.6691       | 0.676733333  | 0.559066667  | -0.154833333 |
| FLJ20699     | 0.4517       | 0.368533333  | 0.329833333  | -0.270033333 |
| ADD3         | -0.144066667 | 0.1654       | 0.278366667  | -0.741166667 |
| PLOD1        | 0.3436       | 0.335733333  | 0.3345       | -0.385933333 |
| PPM1E        | 0.220833333  | 0.2477       | 0.278233333  | -0.536633333 |
| DAPK1        | 0.43         | 0.285233333  | 0.529333333  | -0.305066667 |
| FHL2         | 0.990266667  | 0.901033333  | 0.240133333  | 0.0773       |
| PREP         | 0.643733333  | 0.5725       | 0.474766667  | -0.246133333 |
| CYFIP2       | 0.351866667  | 0.464866667  | 0.5172       | -0.273933333 |
| GATAD2A      | 0.3937       | 0.334266667  | 0.4431       | -0.199       |
| FBXO6        | 0.003766667  | 0.156233333  | 0.176066667  | -0.532033333 |
| CDC45L       | 0.753866667  | 0.637066667  | 0.618766667  | 0.026566667  |
| MICAL1       | 0.208733333  | 0.334633333  | 0.645066667  | -0.346133333 |
| LOC642197    | 0.260233333  | 0.4254       | 0.482066667  | -0.355433333 |
| NFIB         | 0.405733333  | 0.5654       | 0.333366667  | -0.264833333 |
| PHGDH        | -0.010433333 | -0.053633333 | -0.119433333 | -0.6615      |
| PNMA2        | 0.3085       | 0.148533333  | 0.1942       | -0.480133333 |
| HOOK3        | 0.4785       | 0.547066667  | 0.3928       | -0.273633333 |
| RAB32        | 0.064766667  | 0.208866667  | 0.629633333  | -0.385633333 |
| PIP4K2A      | 0.181633333  | 0.094933333  | 0.182933333  | -0.4288      |
| ACPL2        | 0.706533333  | 0.749933333  | 0.800566667  | -0.059233333 |
| PDXDC1       | 0.1164       | 0.1742       | 0.169833333  | -0.651       |
| WWTR1        | 0.953833333  | 1.034166667  | 0.751333333  | 0.188033333  |
| SNX4         | 0.552166667  | 0.353733333  | 0.506966667  | -0.1712      |
| CNNM3        | 0.218666667  | 0.2741       | 0.329066667  | -0.378366667 |
| SHROOM2      | 1.3974       | 0.9285       | 0.4381       | 0.404        |
| OSTM1        | 0.0474       | 0.1816       | 0.754433333  | -0.364533333 |
| MPHOSPH9     | 0.2862       | 0.4299       | 0.509166667  | -0.331733333 |
| FRMD8        | 0.663233333  | 0.584033333  | 0.4197       | -0.218333333 |
| GNB1L        | 0.547633333  | 0.622466667  | 0.611633333  | -0.165266667 |
| EMB          | 0.683533333  | 0.577866667  | 0.4596       | -0.054966667 |
| MOCOS        | 0.3589       | 0.5083       | 0.5082       | -0.310833333 |
| LOC100130886 | 0.096066667  | 0.344        | 0.7413       | -0.230233333 |
| UGT8         | 0.634733333  | 0.657066667  | 0.396033333  | -0.1378      |
| ABC6         | -0.102866667 | 0.199433333  | 0.5105       | -0.536       |
| C16orf52     | 0.915466667  | 0.819066667  | 0.610033333  | 0.0947       |
| MEGF9        | 0.192333333  | 0.220033333  | 0.114166667  | -0.4548      |
| C1orf135     | 0.829466667  | 0.641233333  | 0.651266667  | 0.046433333  |
| 5-Mar        | 0.219333333  | 0.815433333  | 0.892133333  | -0.189666667 |
| CDK2         | 0.281666667  | 0.1867       | 0.867933333  | -0.254966667 |
| ACADM        | 0.3128       | 0.230633333  | 0.402666667  | -0.4294      |
| YWHAZ        | 0.731133333  | 0.529766667  | 0.409166667  | -0.1808      |
| SDF2L1       | 0.600766667  | 0.7845       | 0.623766667  | -0.0551      |

|           |             |             |             |              |
|-----------|-------------|-------------|-------------|--------------|
| ZNF684    | 0.501866667 | 0.452233333 | 0.437266667 | -0.239666667 |
| TLL4      | 0.370833333 | 0.498466667 | 0.483366667 | -0.252966667 |
| HPSE      | 0.209666667 | 0.210533333 | 0.2819      | -0.5666      |
| NARS2     | 0.206333333 | 0.364133333 | 0.6399      | -0.383066667 |
| RRP7A     | 0.753533333 | 0.738166667 | 0.6701      | -0.0244      |
| ALDH1A3   | 0.7167      | 0.973366667 | 0.789133333 | 0.120066667  |
| OKL38     | 0.577166667 | 0.523566667 | -0.0967     | -0.0092      |
| IFI16     | 0.000366667 | 0.306366667 | 0.618933333 | -0.4225      |
| IMPA1     | 0.691966667 | 0.487533333 | 0.5512      | -0.180233333 |
| TMEM201   | 0.638633333 | 0.612766667 | 0.6176      | -0.045533333 |
| TMEM51    | 0.208733333 | 0.452633333 | 0.459733333 | -0.213633333 |
| RNF19B    | 0.3351      | 0.209666667 | 0.2566      | -0.311866667 |
| DHX33     | 0.5374      | 0.7971      | 0.784633333 | 0.0596       |
| SPRY2     | 0.954066667 | 0.9512      | 0.726433333 | 0.327566667  |
| COMT      | 0.053733333 | 0.1215      | 0.304233333 | -0.5068      |
| KIF16B    | 0.108266667 | 0.395233333 | 0.319166667 | -0.513633333 |
| SAMM50    | 0.162133333 | 0.332733333 | 0.554233333 | -0.355433333 |
| LOC731797 | 0.2238      | 0.531966667 | 0.537266667 | -0.326766667 |
| SPNS1     | 0.0494      | 0.246033333 | 0.3151      | -0.4958      |
| PRSS23    | 0.2831      | 0.287766667 | 0.0146      | -0.312966667 |
| FAM58A    | 0.290766667 | 0.3774      | 0.317       | -0.3988      |
| TTF2      | 0.5972      | 0.660366667 | 0.799333333 | -0.0622      |
| MAPK1     | 0.266366667 | 0.411933333 | 0.243266667 | -0.319866667 |
| RTN4R     | 0.107       | 0.238433333 | 0.386166667 | -0.4737      |
| RPS6KA3   | 0.800733333 | 0.551033333 | 0.394833333 | -0.180133333 |
| PCCB      | 0.203566667 | 0.215333333 | 0.342566667 | -0.416166667 |
| ATP13A2   | 0.746666667 | 0.505333333 | 0.262833333 | -0.1182      |
| FOXRED2   | 0.212766667 | 0.439866667 | 0.6188      | -0.335366667 |
| MAP3K1    | 0.546766667 | 0.451566667 | 0.614466667 | -0.224033333 |
| SWAP70    | 0.3589      | 0.3636      | 0.673433333 | -0.083966667 |
| FZD6      | 0.502866667 | 0.447666667 | 0.5118      | -0.170033333 |
| ERCC1     | 0.2157      | 0.111       | 0.363866667 | -0.5068      |
| SIK3      | 0.301233333 | 0.2236      | 0.228566667 | -0.571666667 |
| PDCL3     | 0.489533333 | 0.535966667 | 0.556733333 | -0.0582      |
| HSD17B1   | 0.299466667 | 0.253733333 | 0.1764      | -0.5764      |
| KIF3C     | 0.310433333 | 0.303033333 | 0.5294      | -0.360033333 |
| LOC644423 | 0.4799      | 0.4228      | 0.4241      | -0.305466667 |
| ATP8B2    | 0.2162      | 0.264566667 | 0.291566667 | -0.5498      |
| PNMAL1    | 0.414566667 | 0.330966667 | 0.482766667 | -0.308333333 |
| MFAP2     | 0.6708      | 0.518233333 | 0.4438      | -0.1454      |
| ACYP1     | 0.6129      | 0.8648      | 0.885433333 | -0.002       |
| UBXN2A    | 0.4465      | 0.5677      | 0.3803      | -0.203333333 |
| PKD2      | 0.181066667 | 0.0014      | 0.1657      | -0.6014      |
| ETV4      | 0.565166667 | 0.7162      | 1.097866667 | 0.059833333  |
| FAM81A    | 0.159633333 | 0.389166667 | 0.5286      | -0.4138      |
| PIGH      | 0.344       | 0.506       | 0.491266667 | -0.3028      |
| FAM91A1   | 0.632866667 | 0.585466667 | 0.624       | -0.055766667 |

|              |              |             |             |              |
|--------------|--------------|-------------|-------------|--------------|
| SLC25A15     | 0.563966667  | 0.671733333 | 0.5342      | -0.127366667 |
| IVNS1ABP     | 0.127866667  | 0.1853      | 0.733433333 | -0.651633333 |
| CHSY3        | 0.413366667  | 0.388166667 | 0.409066667 | -0.3344      |
| RELL1        | 0.4688       | 0.757333333 | 0.902       | -0.0969      |
| DSCC1        | 0.498333333  | 0.9242      | 0.920566667 | 0.007033333  |
| GPSM2        | 0.838766667  | 0.584033333 | 0.456266667 | -0.102966667 |
| ANK3         | 0.160333333  | 0.5833      | 0.216366667 | -0.568366667 |
| LOC158160    | 0.484566667  | 0.722733333 | 0.9471      | 0.1125       |
| MAGEA1       | 0.7708       | 0.699633333 | 0.615266667 | -0.0222      |
| QPCT         | 0.1117       | 0.072633333 | 0.445133333 | -0.5936      |
| PAX9         | 0.476666667  | 0.4231      | 0.5847      | -0.204733333 |
| LOC646044    | 0.4587       | 0.3823      | 0.5951      | -0.2509      |
| SEMA4F       | 0.223733333  | 0.340233333 | 0.269666667 | -0.503666667 |
| PHF19        | 0.7095       | 0.666433333 | 0.726966667 | -0.030366667 |
| GAL3ST4      | 0.3686       | 0.5346      | 0.359466667 | -0.370266667 |
| DBI          | 0.448166667  | 0.607933333 | 0.912433333 | 0.016866667  |
| C14orf169    | 0.686        | 0.6688      | 0.640066667 | -0.0372      |
| EYA1         | 0.2117       | 0.309966667 | 0.3196      | -0.537       |
| ANKRD46      | 0.3476       | 0.3499      | 0.712466667 | -0.1505      |
| HS1BP3       | 0.0179       | 0.143433333 | 0.171133333 | -0.5905      |
| ABCC5        | 0.282833333  | 0.327666667 | 0.407866667 | -0.418633333 |
| LDLR         | 0.9537       | 0.945966667 | 1.2868      | 0.802833333  |
| ELMO1        | 0.368333333  | 0.4495      | 0.444333333 | -0.224233333 |
| FAM53B       | 0.106466667  | 0.3485      | 0.466166667 | -0.540733333 |
| ABCA1        | 0.7058       | 0.213066667 | 0.1661      | -0.3765      |
| GALM         | -0.207433333 | 0.0305      | 0.3457      | -0.791133333 |
| ALDH1B1      | 0.390733333  | 0.573633333 | 0.677233333 | -0.130333333 |
| AP3M2        | 0.285433333  | 0.411533333 | 0.740566667 | -0.221166667 |
| GRK5         | 0.572066667  | 0.702733333 | 0.844566667 | -0.1415      |
| FRMD4A       | 0.4722       | 0.448933333 | 0.328033333 | -0.134766667 |
| OAS1         | 0.171833333  | 0.251866667 | 0.545866667 | -0.501566667 |
| ZNF74        | 0.321433333  | 0.196       | 0.281233333 | -0.444066667 |
| ADAM15       | 0.2272       | 0.054633333 | 0.112833333 | -0.6801      |
| LOC100133012 | 0.5145       | 0.762566667 | 0.8018      | -0.1927      |
| PELI1        | 0.7705       | 0.510666667 | 0.505266667 | -0.070566667 |
| POLE2        | 0.7861       | 0.833866667 | 0.734966667 | 0.038433333  |
| PLEKHH1      | 0.206133333  | 0.441366667 | 0.983333333 | -0.167466667 |
| ZEB2         | 0.388666667  | 0.190433333 | 0.078366667 | -0.5528      |
| MYC          | 0.5012       | 0.555666667 | 0.8438      | -0.1163      |
| HNMT         | 0.092033333  | -0.0455     | 0.095666667 | -0.8206      |
| TIMP3        | 0.933433333  | 0.822133333 | 0.119366667 | -0.337266667 |
| PRKACB       | 0.682033333  | 0.695466667 | 0.673533333 | -0.1561      |
| LITAF        | 0.3398       | 0.3924      | 0.345833333 | -0.3931      |
| YTHDF2       | 0.636466667  | 0.621733333 | 0.894233333 | -0.0748      |
| RNF182       | 0.8736       | 0.6571      | 0.615933333 | -0.1441      |
| SLC12A2      | 0.450466667  | 0.464333333 | 0.759633333 | -0.128866667 |
| AIM1         | 0.794333333  | 0.789733333 | 0.724733333 | 0.053333333  |

|              |              |             |              |              |
|--------------|--------------|-------------|--------------|--------------|
| MCM6         | 0.6936       | 0.815333333 | 0.707833333  | -0.1487      |
| BCL2         | 0.490766667  | 0.555366667 | 0.616333333  | -0.1616      |
| C6orf108     | 0.1989       | 0.432366667 | 0.6672       | -0.3966      |
| RHPN2        | 0.587966667  | 0.7348      | 0.757833333  | -0.0305      |
| ETNK1        | 0.408733333  | 0.563166667 | 0.505366667  | -0.2457      |
| BMP8B        | 0.457833333  | 0.8138      | 0.116866667  | -0.494866667 |
| SIP1         | 0.672266667  | 0.673166667 | 0.639166667  | -0.088566667 |
| SIGMAR1      | 0.431966667  | 0.516933333 | 0.5523       | -0.260533333 |
| LOC389599    | 0.205        | 0.397533333 | 0.509366667  | -0.393333333 |
| LOC392301    | 0.284966667  | 0.600866667 | 0.8033       | -0.139933333 |
| TRAK2        | 0.091966667  | 0.178066667 | 0.4444       | -0.636033333 |
| BNC2         | 0.3971       | 0.405466667 | 0.765366667  | -0.310933333 |
| USP18        | 0.5366       | 0.5663      | 0.6416       | -0.2086      |
| LOC654244    | 0.614833333  | 0.576666667 | 0.6277       | -0.183066667 |
| LRP8         | 0.798766667  | 0.826533333 | 0.839366667  | 0.0689       |
| ACBD7        | 0.465433333  | 0.5503      | 0.997266667  | -0.1703      |
| PEMT         | 0.2863       | 0.193333333 | 0.166466667  | -0.636333333 |
| CYTH3        | 0.713366667  | 0.473366667 | 0.537733333  | -0.170433333 |
| LIX1L        | 0.734066667  | 0.561866667 | 0.6425       | -0.021633333 |
| ARHGEF11     | 0.774933333  | 0.525866667 | 0.648433333  | -0.166866667 |
| PPFIBP2      | -0.076233333 | 0.085866667 | 0.3711       | -0.746866667 |
| KIAA1211     | 0.240066667  | 0.4152      | 0.6263       | -0.3194      |
| SCRIB        | 0.7818       | 0.619166667 | 0.463366667  | -0.1731      |
| LOC100133489 | 0.567166667  | 0.700833333 | 0.838233333  | -0.1072      |
| RAB9A        | 0.047533333  | 0.043066667 | 0.219        | -0.702966667 |
| LOC100132394 | 0.2901       | 0.7566      | -0.232466667 | -0.7329      |
| GAS2L3       | 0.617766667  | 0.684366667 | 0.956366667  | -0.107433333 |
| HOXD13       | 0.650433333  | 0.5784      | 0.719733333  | -0.2029      |
| FAM84B       | 0.7415       | 1.250266667 | 1.171466667  | 0.4398       |
| GALNT1       | 0.4671       | 0.483933333 | 0.398033333  | -0.357933333 |
| ADPRH        | 0.392633333  | 0.406133333 | 0.3843       | -0.486933333 |
| CPEB2        | 0.268266667  | 0.234933333 | 0.442233333  | -0.533466667 |
| MREG         | 0.173733333  | 0.312833333 | 0.924033333  | -0.2833      |
| VAMP8        | 0.366433333  | 0.4153      | 0.737633333  | -0.286366667 |
| JAM3         | 0.613066667  | 0.642366667 | 0.4429       | -0.269666667 |
| ASAH1        | 0.018        | -0.1182     | 0.426733333  | -0.6758      |
| C3orf21      | 0.0055       | 0.444133333 | 0.836066667  | -0.454266667 |
| SNX8         | 0.251166667  | 0.525333333 | 0.469633333  | -0.3997      |
| FAM49B       | 0.640566667  | 0.6447      | 0.6659       | -0.265166667 |
| NGFR         | 0.874533333  | 1.1218      | 0.245133333  | -0.1641      |
| LOC730041    | 0.175666667  | 0.419966667 | 0.678633333  | -0.5421      |
| TMEM179B     | 0.090266667  | 0.071566667 | 0.1937       | -0.806266667 |
| GCAT         | 0.060066667  | 0.211333333 | 0.3477       | -0.573666667 |
| CLDN20       | 0.500166667  | 0.637766667 | 1.058466667  | 0.008966667  |
| CDC7         | 0.752066667  | 0.754733333 | 0.7787       | -0.056966667 |
| GMPR         | 0.5331       | 0.536233333 | 0.6482       | -0.2333      |
| CLCN7        | -0.225       | 0.126366667 | 0.538466667  | -0.646766667 |



|              |              |              |             |              |
|--------------|--------------|--------------|-------------|--------------|
| HLA-DQB1     | 0.372233333  | 0.2744       | 0.374266667 | -0.4994      |
| TRMT12       | 0.122933333  | 0.3204       | 0.628533333 | -0.4545      |
| SQLE         | 0.413366667  | 0.533733333  | 0.806433333 | -0.030966667 |
| SPATA22      | 0.4812       | 0.581966667  | 0.351133333 | -0.4445      |
| LOC100130769 | 0.685533333  | 1.0194       | 0.840466667 | -0.163633333 |
| PRMT2        | 0.148433333  | 0.084433333  | 0.1939      | -0.639833333 |
| WASPIP       | 0.660766667  | 0.7935       | 1.276033333 | 0.217633333  |
| AZI1         | 0.403566667  | 0.573533333  | 0.828666667 | -0.2485      |
| RDX          | 0.527866667  | 0.417033333  | 0.276733333 | -0.434966667 |
| GNPTAB       | 0.041566667  | 0.359533333  | 0.786266667 | -0.458866667 |
| PPP2R5A      | 0.258933333  | 0.217933333  | 0.374266667 | -0.517666667 |
| ZNF518B      | 0.431233333  | 0.483133333  | 0.530433333 | -0.369833333 |
| RTKN         | 0.2814       | 0.302533333  | 0.304066667 | -0.573466667 |
| SLC39A10     | 0.7239       | 0.648833333  | 0.574033333 | -0.2083      |
| HES1         | 1.178766667  | 0.582566667  | 0.8388      | 0.4415       |
| PAQR4        | 0.675966667  | 0.735866667  | 0.758833333 | -0.004666667 |
| FLJ10916     | 0.073366667  | 0.139633333  | 0.223133333 | -0.699366667 |
| SORD         | 0.4966       | 0.5774       | 0.399366667 | -0.449133333 |
| COX5B        | 0.174166667  | 0.2331       | 0.5439      | -0.493833333 |
| MAP3K6       | 0.6381       | 0.5811       | 0.4628      | -0.223833333 |
| CXorf57      | 0.7043       | 0.684766667  | 0.387733333 | -0.229133333 |
| NDUFS3       | 0.438066667  | 0.416433333  | 0.4605      | -0.343866667 |
| FAM43A       | 0.248566667  | -0.0147      | 0.065333333 | -0.316966667 |
| TMX1         | 0.542        | 0.401733333  | 0.586       | -0.287333333 |
| SSBP4        | 0.327566667  | 0.375466667  | 0.590666667 | -0.4777      |
| PDK3         | 0.564933333  | 0.578633333  | 0.746766667 | -0.3071      |
| SNX25        | 0.665166667  | 0.521666667  | 0.589566667 | -0.281666667 |
| CDH19        | 0.944833333  | 0.544333333  | 0.159333333 | -0.3239      |
| SAMD4A       | 0.515833333  | 0.726733333  | 0.8204      | -0.1661      |
| TANC1        | 0.517866667  | 0.296566667  | 0.554466667 | -0.440133333 |
| SPRR2D       | 0.6824       | 0.676066667  | 0.867166667 | -0.023733333 |
| MACROD1      | 0.3364       | 0.301466667  | 0.451666667 | -0.415666667 |
| SLC3A2       | -0.081533333 | 0.0418       | 0.125933333 | -0.63        |
| MCOLN2       | 0.564133333  | 0.486466667  | 0.699366667 | -0.166166667 |
| NCAM1        | 0.474        | 0.704        | 0.8325      | -0.212866667 |
| PROS1        | 0.056166667  | 0.029433333  | 0.1167      | -0.801033333 |
| LOC100129960 | -0.0869      | 0.077333333  | 0.672233333 | -0.805333333 |
| CBR1         | 0.260333333  | 0.420066667  | 0.5045      | -0.499966667 |
| DHCR24       | 0.529133333  | 0.5942       | 0.9362      | 0.052866667  |
| TMEM140      | -0.3703      | -0.140633333 | 0.2991      | -0.9143      |
| ACN9         | 0.226266667  | 0.260066667  | 0.3687      | -0.569166667 |
| MCAM         | 0.830966667  | 0.770833333  | 0.6385      | -0.130033333 |
| C1orf59      | 0.0721       | 0.234533333  | 0.4031      | -0.6387      |
| ATP6V1B2     | 0.739766667  | 0.6244       | 0.557833333 | -0.104166667 |
| FEZ1         | 0.3047       | 0.4652       | 0.488933333 | -0.611       |
| SDCBP        | 0.023866667  | 0.025233333  | 0.770866667 | -0.6715      |
| TMEM177      | 0.458266667  | 0.609866667  | 0.611333333 | -0.2813      |

|              |              |             |             |              |
|--------------|--------------|-------------|-------------|--------------|
| LOC374395    | 0.116        | 0.242566667 | 0.268666667 | -0.8108      |
| GINS4        | 0.7177       | 0.911666667 | 0.879333333 | -0.020233333 |
| DUSP4        | 0.977766667  | 0.867366667 | 0.983733333 | 0.094666667  |
| SLC26A2      | 0.808966667  | 0.839966667 | 0.688433333 | -0.002033333 |
| INCENP       | 1.004066667  | 0.674133333 | 0.7081      | 0.0683       |
| LOC100133678 | 0.110966667  | 0.121533333 | 0.252733333 | -0.789066667 |
| SEPN1        | 0.4221       | 0.2723      | 0.2647      | -0.5564      |
| RAP2A        | 0.656233333  | 0.4336      | 0.4258      | -0.273133333 |
| SYNE2        | 0.2877       | 0.435466667 | 0.540866667 | -0.640933333 |
| LOC729200    | 0.986133333  | 0.979966667 | 0.6811      | 0.083266667  |
| TMEM135      | 0.1923       | 0.344966667 | 0.6856      | -0.374266667 |
| TMEM173      | 0.395333333  | 0.3009      | 0.288166667 | -0.554633333 |
| DMRT2        | 0.580266667  | 0.953066667 | 0.8713      | -0.064266667 |
| C18orf56     | 0.646066667  | 0.481433333 | 0.872533333 | -0.2647      |
| STRADB       | 0.361933333  | 0.439233333 | 0.5879      | -0.383733333 |
| LOC642073    | 0.336666667  | 0.379166667 | 0.223466667 | -0.560733333 |
| RAVER2       | 0.197833333  | 0.476666667 | 0.692166667 | -0.524066667 |
| EPS8         | 0.352633333  | 0.1716      | 0.182866667 | -0.669766667 |
| ASH2L        | 0.300066667  | 0.364766667 | 0.418833333 | -0.366666667 |
| NPL          | 0.203433333  | 0.358933333 | 0.769466667 | -0.4871      |
| ASAP3        | 0.284933333  | 0.2981      | 0.1516      | -0.774033333 |
| OMA1         | -0.058633333 | 0.2738      | 0.2416      | -0.802333333 |
| PECR         | 0.0452       | 0.333433333 | 0.399533333 | -0.7339      |
| GAGE12B      | 0.434533333  | 0.431533333 | 0.436833333 | -0.356766667 |
| PAG1         | 0.467533333  | 0.697       | 0.683233333 | -0.3049      |
| DAG1         | 0.704733333  | 0.725266667 | 0.5151      | -0.2408      |
| MEF2C        | 0.570333333  | 0.3134      | 0.279966667 | -0.5916      |
| ARMC9        | -0.0635      | -0.0228     | 0.0888      | -0.7822      |
| AK5          | 0.3638       | 0.331666667 | 0.490166667 | -0.399666667 |
| MSI2         | 0.495566667  | 0.628633333 | 0.635933333 | -0.275033333 |
| ECH1         | -0.117066667 | 0.106666667 | 0.162       | -0.931933333 |
| ETV5         | 0.626366667  | 0.9371      | 1.219833333 | -0.103566667 |
| TBX2         | 0.682433333  | 0.6097      | 0.329833333 | -0.317833333 |
| FASN         | 0.494933333  | 0.220033333 | 0.5274      | -0.3305      |
| NIN          | 0.710933333  | 0.426133333 | 1.003666667 | -0.124733333 |
| FAIM         | 0.720633333  | 0.738666667 | 0.603633333 | -0.2586      |
| CTGLF7       | 0.418166667  | 0.5226      | 0.659133333 | -0.422333333 |
| POLR3G       | 0.918066667  | 0.957466667 | 0.896666667 | -0.0485      |
| MBP          | 0.209133333  | 0.260833333 | 1.187033333 | -0.467766667 |
| PDXP         | 0.973366667  | 0.912166667 | 0.693833333 | -0.039133333 |
| FYCO1        | 0.1123       | 0.366433333 | 0.7778      | -0.525033333 |
| MRPL44       | 0.339466667  | 0.492033333 | 0.404966667 | -0.5333      |
| DNASE2       | -0.083433333 | -0.2392     | 0.0183      | -1.009466667 |
| WIPF1        | 0.971133333  | 1.144666667 | 1.3097      | 0.256933333  |
| FNTB         | 0.373266667  | 0.718966667 | 0.879366667 | -0.206966667 |
| FAM117B      | 0.152233333  | 0.2262      | 0.4979      | -0.670733333 |
| LOC285735    | 0.617966667  | 1.131233333 | 1.195833333 | -0.032433333 |

|              |              |              |              |              |
|--------------|--------------|--------------|--------------|--------------|
| EEF2K        | 0.334433333  | 0.4002       | 0.679466667  | -0.545333333 |
| C9orf93      | 0.290066667  | 0.381366667  | 0.584033333  | -0.445566667 |
| ACP5         | -0.0708      | -0.0346      | 0.411433333  | -0.749066667 |
| FBXO7        | 0.289833333  | 0.3951       | 0.518766667  | -0.475133333 |
| SPTBN1       | 0.380366667  | 0.5067       | 0.629766667  | -0.476833333 |
| MOSPD2       | 0.439433333  | 0.625        | 0.470666667  | -0.381166667 |
| KIAA1688     | 0.352733333  | 0.279133333  | 0.5309       | -0.508266667 |
| LY6E         | 0.3157       | 0.1528       | 0.430133333  | -0.6012      |
| LOC387934    | 0.898866667  | 1.0835       | 0.751766667  | 0.0119       |
| EFCAB7       | 0.249333333  | 0.316266667  | 0.423833333  | -0.612       |
| GYPC         | 0.0566       | 0.043966667  | 0.687033333  | -0.598933333 |
| ZDHHC14      | 0.362333333  | 0.946533333  | 0.965166667  | -0.227333333 |
| PDE6D        | 0.197333333  | 0.594533333  | 0.607633333  | -0.476166667 |
| NLRP11       | 0.4207       | 0.4439       | 0.577466667  | -0.458566667 |
| AIFM1        | 0.626        | 0.4344       | 0.546266667  | -0.407933333 |
| ANG          | 0.126233333  | 0.1409       | 0.147066667  | -0.856433333 |
| TMEM20       | 0.705266667  | 0.8822       | 1.0322       | -0.067166667 |
| LOC100134304 | 0.722533333  | 0.859466667  | 0.950366667  | -0.2245      |
| RUNX3        | 0.554766667  | 0.383833333  | 1.0798       | -0.009533333 |
| LSAMP        | 0.3082       | 0.4308       | 0.6396       | -0.582966667 |
| CD320        | 0.3438       | 0.344366667  | 0.4976       | -0.512233333 |
| DACT1        | 1.448966667  | 0.4809       | -0.182       | -0.1055      |
| ATP1A1       | 0.468733333  | 0.5685       | 0.677133333  | -0.3419      |
| BHLHB3       | 0.024366667  | 0.353433333  | 0.9384       | -0.563833333 |
| UGP2         | 0.731766667  | 0.997766667  | 0.8403       | -0.089633333 |
| IMPA2        | -0.0168      | 0.174133333  | 0.242666667  | -0.867733333 |
| SLC7A5       | 0.185333333  | -0.126366667 | -0.001733333 | -0.891933333 |
| SCARF2       | 0.670533333  | 0.360566667  | 0.332766667  | -0.502633333 |
| DYRK2        | 0.701966667  | 0.7023       | 0.670766667  | -0.203133333 |
| CNKSR3       | 0.782166667  | 0.7509       | 0.782366667  | -0.098433333 |
| C1orf85      | -0.078166667 | 0.003466667  | 0.416766667  | -0.808533333 |
| CD74         | 0.069733333  | -0.060666667 | 0.116433333  | -0.961866667 |
| SLC7A2       | 0.083        | 0.165366667  | 0.413733333  | -0.661966667 |
| FAM70A       | 0.289333333  | 0.428366667  | 0.757466667  | -0.553233333 |
| CCDC28B      | 0.397033333  | 0.5506       | 0.839166667  | -0.4755      |
| C6orf129     | 0.606933333  | 0.684333333  | 0.851666667  | -0.215966667 |
| KHDRBS3      | 1.079033333  | 1.0484       | 0.558133333  | -0.0107      |
| DIP2B        | 0.4935       | 0.495266667  | 0.621766667  | -0.334133333 |
| GDF15        | 0.4884       | 0.7813       | 1.297633333  | 0.004666667  |
| MYO5A        | 0.351533333  | 0.3554       | 0.707566667  | -0.3497      |
| LACTB2       | 0.2451       | 0.220966667  | 0.2537       | -0.630033333 |
| ZNF703       | 0.6207       | 0.6802       | 1.048833333  | -0.101866667 |
| RAB9B        | 0.311666667  | 0.829233333  | 0.7448       | -0.3313      |
| SLC5A3       | 0.529433333  | 0.627333333  | 0.882766667  | -0.228133333 |
| SNTB1        | 0.764433333  | 0.8006       | 0.7837       | -0.040233333 |
| HELZ         | 0.4635       | 0.767966667  | 0.6504       | -0.4249      |
| STOX2        | 0.380166667  | 0.423933333  | 0.478666667  | -0.483966667 |

|           |              |              |             |              |
|-----------|--------------|--------------|-------------|--------------|
| MRPS6     | 0.590633333  | 0.505233333  | 0.5567      | -0.4036      |
| SORBS2    | 0.843533333  | 0.4878       | -0.0067     | -0.371966667 |
| IDH1      | -0.364333333 | -0.043533333 | 0.243066667 | -0.9738      |
| SPSB1     | 0.092066667  | 0.107366667  | 0.407933333 | -0.704766667 |
| TLL12     | 0.567733333  | 0.653366667  | 0.436166667 | -0.281333333 |
| HDAC4     | 0.339966667  | 0.780566667  | 0.856666667 | -0.555366667 |
| PGCP      | 0.032366667  | 0.076266667  | 0.342133333 | -0.7192      |
| PLCG2     | 0.201033333  | 0.329266667  | 0.478733333 | -0.608366667 |
| FNBP1L    | 0.453        | 0.396466667  | 0.482566667 | -0.559666667 |
| MXI1      | 0.204566667  | 0.290266667  | 0.495666667 | -0.711233333 |
| VLDLR     | 0.727433333  | 0.468966667  | 0.429933333 | -0.592533333 |
| SH3PXD2A  | 0.456566667  | 0.421133333  | 0.5763      | -0.397566667 |
| FOXN2     | 0.497333333  | 0.596466667  | 0.764966667 | -0.393333333 |
| STX3      | 0.3117       | 0.225066667  | 0.477966667 | -0.465466667 |
| BTBD3     | 0.511333333  | 0.426933333  | 0.607833333 | -0.488033333 |
| ADARB1    | 0.574633333  | 0.486233333  | 0.3763      | -0.533266667 |
| NAV2      | 0.268666667  | 0.5519       | 0.960833333 | -0.571766667 |
| MID1      | 0.8952       | 0.8961       | 0.761066667 | -0.1665      |
| RAB3IL1   | 0.2277       | 0.310966667  | 0.064766667 | -0.812466667 |
| TOP1MT    | 0.187766667  | 0.338933333  | 0.3474      | -0.6288      |
| BACE2     | 0.5929       | 0.596166667  | 0.776       | -0.475566667 |
| GREB1     | 0.3075       | 0.348        | 0.342733333 | -0.672166667 |
| SLC25A13  | 0.484133333  | 0.5208       | 0.5909      | -0.462633333 |
| FANCB     | 1.163566667  | 1.1499       | 0.850033333 | -0.0036      |
| MGC10997  | 0.2728       | 0.629266667  | 0.897966667 | -0.435833333 |
| CLDN14    | 0.505066667  | 0.675866667  | 0.9824      | -0.316933333 |
| RIPK4     | 0.552966667  | 0.354733333  | 0.867533333 | -0.2962      |
| BCL11A    | 0.379466667  | 0.401966667  | 1.036       | -0.387766667 |
| PSEN2     | 0.3866       | 0.6012       | 0.881666667 | -0.2165      |
| LRIG1     | 0.425633333  | 0.557133333  | 0.403233333 | -0.370033333 |
| LOC338579 | 0.492966667  | 0.636733333  | 0.461233333 | -0.540566667 |
| TPCN2     | 0.527233333  | 0.661766667  | 0.797066667 | -0.3692      |
| NUDT14    | -0.004133333 | 0.229933333  | 0.4133      | -0.760033333 |
| WDR91     | 0.362333333  | 0.3835       | 0.699133333 | -0.529833333 |
| NDE1      | 0.446833333  | 0.257266667  | 0.536633333 | -0.595833333 |
| TBC1D14   | 0.1496       | 0.398533333  | 0.607533333 | -0.748033333 |
| SNRPB2    | 1.2138       | 1.168433333  | 0.887733333 | 0.018666667  |
| APIP      | 0.678566667  | 0.6227       | 0.7863      | -0.365166667 |
| BOP1      | 1.021833333  | 1.033733333  | 0.872166667 | 0.013033333  |
| CTSF      | -0.036066667 | 0.1394       | 0.267566667 | -0.870466667 |
| LBH       | 0.305433333  | 0.4088       | 0.666366667 | -0.572766667 |
| SLC23A2   | 0.541033333  | 0.552666667  | 0.504633333 | -0.491533333 |
| SYTL2     | 0.740966667  | 0.643266667  | 0.281       | -0.482266667 |
| STAT5A    | 0.317566667  | 0.210666667  | 0.547933333 | -0.654066667 |
| TRAF3IP2  | 0.8094       | 0.8504       | 1.187666667 | -0.074766667 |
| PEPD      | 0.2162       | 0.220766667  | 0.397366667 | -0.7172      |
| GPNMB     | 0.029366667  | -0.1407      | 0.006566667 | -0.891733333 |

|              |              |             |             |              |
|--------------|--------------|-------------|-------------|--------------|
| GAGE12H      | 0.6284       | 0.596866667 | 0.621866667 | -0.4122      |
| FABP5        | 0.994366667  | 0.9555      | 0.878533333 | -0.1254      |
| ITPR1        | 0.689733333  | 0.8014      | 0.974566667 | -0.208866667 |
| ZNF362       | 0.430866667  | 0.2042      | 0.1479      | -0.735766667 |
| LOC100128675 | 0.8465       | 0.5886      | 0.9164      | -0.095333333 |
| TMTC2        | 0.45         | 0.5934      | 0.542266667 | -0.521366667 |
| ENDOD1       | 0.662366667  | 0.6425      | 0.831333333 | -0.408233333 |
| TMEM123      | 0.424533333  | 0.382466667 | 0.6731      | -0.618166667 |
| ZNF706       | 0.1214       | 0.2313      | 0.603933333 | -0.8432      |
| LOC653381    | 0.5514       | 0.667366667 | 0.610966667 | -0.4191      |
| FDFT1        | 0.4883       | 0.529033333 | 0.709233333 | -0.365033333 |
| FOXD2        | 0.9922       | 0.785466667 | 0.726966667 | -0.149666667 |
| SLC35F5      | 0.455066667  | 0.5742      | 0.6566      | -0.423666667 |
| RCC2         | 0.959866667  | 0.8512      | 0.754333333 | -0.192266667 |
| SORCS1       | 0.378366667  | 0.529333333 | 0.7615      | -0.475       |
| CXorf48      | 0.7301       | 0.732133333 | 0.735433333 | -0.302866667 |
| GPR19        | 0.689633333  | 0.773       | 0.53        | -0.402533333 |
| RCAN3        | 1.0049       | 0.9692      | 0.826133333 | -0.1287      |
| IL17D        | 0.477033333  | 0.4004      | 0.933433333 | -0.485366667 |
| ISG20        | 0.1643       | 0.298033333 | 1.128833333 | -0.458266667 |
| SOX13        | 0.7092       | 0.7452      | 0.8765      | -0.198966667 |
| LOC729680    | 0.454833333  | 0.6307      | 1.143066667 | -0.4238      |
| SLC47A1      | 0.417033333  | 0.7153      | 0.774766667 | -0.386133333 |
| TRIB2        | 0.782866667  | 0.728166667 | 0.8344      | -0.3771      |
| SLC30A1      | 1.232766667  | 0.7954      | 0.7157      | -0.102833333 |
| PEG10        | 0.5818       | 0.9014      | 0.603366667 | -0.410266667 |
| C14orf147    | 0.0973       | 0.263033333 | 0.286766667 | -0.884933333 |
| CADM1        | -0.083033333 | 0.180233333 | -0.4105     | -1.231666667 |
| MRI1         | 0.518133333  | 0.439566667 | 0.587333333 | -0.6035      |
| GSN          | 0.253133333  | 0.15        | 0.475266667 | -0.8525      |
| GAGE12F      | 0.521        | 0.497133333 | 0.607933333 | -0.5178      |
| GPR126       | 0.892366667  | 1.037933333 | 0.970833333 | -0.061833333 |
| KCTD14       | 0.8643       | 0.941       | 0.916633333 | -0.226333333 |
| RNF38        | 0.430166667  | 0.4993      | 0.470266667 | -0.630766667 |
| ENTPD6       | 0.5691       | 0.5767      | 0.455833333 | -0.5198      |
| KLF9         | 0.147966667  | 0.202966667 | 0.377866667 | -0.632633333 |
| FAM102B      | 0.609133333  | 0.4786      | 0.8545      | -0.4181      |
| USP48        | 0.4351       | 0.446433333 | 0.4969      | -0.603733333 |
| NAPRT1       | 0.597066667  | 0.501033333 | 0.649333333 | -0.498       |
| PRR4         | 0.672533333  | 0.5794      | 0.7609      | -0.287033333 |
| LAPTM4B      | 0.509433333  | 0.598833333 | 0.5581      | -0.5476      |
| CBR3         | 0.556433333  | 0.587933333 | 0.745366667 | -0.486366667 |
| ELOVL2       | 0.942166667  | 0.9998      | 1.097066667 | -0.110166667 |
| PLTP         | 0.0328       | -0.0131     | 0.211       | -1.0407      |
| FAIM3        | 0.615933333  | 0.709       | 0.6124      | -0.3497      |
| C14orf109    | 0.223833333  | 0.4727      | 0.8246      | -0.629833333 |
| OR7E156P     | 0.390233333  | 0.7         | 0.7738      | -0.5624      |

|              |             |             |             |              |
|--------------|-------------|-------------|-------------|--------------|
| WDR61        | 0.5549      | 0.495133333 | 0.447133333 | -0.6392      |
| TMEM98       | 0.4055      | 0.468533333 | 0.874733333 | -0.4784      |
| TNFSF9       | 1.568166667 | 0.851566667 | 0.8296      | -0.123966667 |
| LOC642956    | 1.2103      | 1.065033333 | 1.048766667 | -0.000166667 |
| INTS3        | 0.343666667 | 0.542733333 | 0.907633333 | -0.575833333 |
| NT5DC3       | 0.604966667 | 0.4802      | 0.637966667 | -0.526033333 |
| NACC2        | 1.292033333 | 1.242933333 | 0.753566667 | -0.106266667 |
| PRKCZ        | 0.5372      | 0.591066667 | 0.4915      | -0.6725      |
| CYP2J2       | 0.557766667 | 0.7004      | 0.849       | -0.48        |
| CTSL2        | 0.6372      | 0.4721      | 0.620633333 | -0.6384      |
| MAGED2       | 0.121133333 | 0.230666667 | 0.421233333 | -0.9469      |
| B4GALT6      | 1.018633333 | 1.086766667 | 1.0986      | -0.172466667 |
| MBOAT1       | 0.608433333 | 0.6328      | 0.797833333 | -0.455233333 |
| TSHZ1        | 0.341266667 | 0.433366667 | 0.528666667 | -0.708733333 |
| SC5DL        | 0.5478      | 0.478266667 | 0.851233333 | -0.366       |
| TBC1D7       | 0.1651      | 0.624433333 | 0.862566667 | -0.413366667 |
| E2F2         | 0.8433      | 1.184666667 | 1.266566667 | -0.202633333 |
| CMTM8        | 0.171166667 | 0.325833333 | 0.2404      | -0.984333333 |
| GAGE12J      | 0.545533333 | 0.396266667 | 0.501666667 | -0.634933333 |
| FABP5L2      | 1.1018      | 1.2357      | 1.084633333 | -0.102433333 |
| LOC100008589 | 0.588633333 | 1.1946      | 0.049833333 | -0.9241      |
| MYLIP        | 0.165933333 | 0.3453      | 0.557266667 | -0.923966667 |
| OCA2         | 0.3948      | 0.5563      | 1.212866667 | -0.416633333 |
| HERC2        | 0.511766667 | 0.610733333 | 0.705366667 | -0.674333333 |
| SLC5A6       | 0.846966667 | 1.007       | 1.207933333 | -0.066333333 |
| EXTL1        | 0.765066667 | 0.787066667 | 0.641133333 | -0.4122      |
| SETDB2       | 0.130733333 | 0.269233333 | 0.671933333 | -0.7934      |
| ACSL1        | 0.4402      | 0.495733333 | 0.743366667 | -0.5804      |
| MAP6D1       | 0.527733333 | 0.6127      | 0.678066667 | -0.5379      |
| LGMN         | 0.440633333 | 0.372433333 | 0.399933333 | -0.6989      |
| LOC100133866 | 0.326633333 | 0.3856      | 1.201533333 | -0.566766667 |
| BCHE         | 0.143566667 | 0.2859      | 0.494066667 | -0.9837      |
| ACSS1        | 0.246       | 0.6342      | 0.557566667 | -0.847       |
| ZADH2        | 0.443266667 | 0.7737      | 0.823066667 | -0.631566667 |
| SYNC1        | 0.56        | 0.596266667 | 0.016333333 | -0.760033333 |
| ATM          | 0.4997      | 0.520333333 | 1.1628      | -0.525066667 |
| GLB1L2       | 0.6736      | 0.601033333 | 0.6852      | -0.520166667 |
| SASH1        | 0.4732      | 0.6886      | 0.733866667 | -0.567366667 |
| SORT1        | 0.577733333 | 0.456366667 | 0.6426      | -0.67        |
| LOC100130919 | 0.965466667 | 0.803166667 | 0.896733333 | -0.278       |
| SLC25A23     | 0.019833333 | 0.1311      | 0.504266667 | -1.0248      |
| MARCKSL1     | 0.946733333 | 1.003533333 | 1.133533333 | -0.1023      |
| MTSS1        | 0.3773      | 0.5522      | 0.9431      | -0.480933333 |
| DBNDD1       | 1.3692      | 0.9519      | 0.467533333 | -0.2821      |
| RCAN1        | 1.4662      | 1.037133333 | 0.569666667 | -0.072833333 |
| AFAP1L1      | 0.667633333 | 0.576       | 0.465933333 | -0.684366667 |
| PLEKHG3      | 0.602666667 | 0.629833333 | 0.7637      | -0.587833333 |

|              |              |              |             |              |
|--------------|--------------|--------------|-------------|--------------|
| RTP4         | 0.231366667  | 0.3202       | 0.535233333 | -0.748133333 |
| LIMK2        | 1.552266667  | 0.968133333  | 1.1584      | 0.101233333  |
| NRP2         | 0.988366667  | 0.877566667  | 0.934766667 | -0.347666667 |
| TNC          | 1.4712       | 1.207533333  | 0.801333333 | -0.052466667 |
| POLB         | 0.430133333  | 0.805933333  | 0.927833333 | -0.6191      |
| LOC284988    | -0.0491      | 0.1145       | 0.502333333 | -1.0957      |
| LOC645037    | 0.623333333  | 0.6698       | 0.7904      | -0.5357      |
| PYCARD       | 0.016566667  | 0.412633333  | 1.293833333 | -0.686733333 |
| TYMS         | 1.303133333  | 1.310433333  | 1.155533333 | 0.040666667  |
| PELI2        | 0.359233333  | 0.4744       | 1.0124      | -0.679066667 |
| COBL         | 0.6531       | 0.843933333  | 0.532033333 | -0.563466667 |
| CPVL         | 0.196666667  | 0.2292       | 0.415033333 | -1.022733333 |
| HOMER2       | 1.041666667  | 0.8944       | 0.989766667 | -0.1846      |
| CA8          | 0.9245       | 0.7758       | 0.608866667 | -0.479733333 |
| C11orf41     | 0.494666667  | 0.761633333  | 0.8808      | -0.713033333 |
| GAD1         | 1.058466667  | 1.092766667  | 1.034766667 | -0.1925      |
| PRKD1        | 0.507966667  | 0.717066667  | 0.6771      | -0.6839      |
| LOC387763    | 0.023633333  | 0.255866667  | 1.2534      | -0.775133333 |
| PODXL2       | 0.633166667  | 0.556766667  | 0.564233333 | -0.663       |
| MTUS1        | 0.646833333  | 0.723133333  | 0.918366667 | -0.5872      |
| GAGE12C      | 0.5999       | 0.713733333  | 0.726766667 | -0.6925      |
| ST3GAL6      | 0.7506       | 0.9799       | 1.4142      | -0.368166667 |
| SCD          | -0.140033333 | 0.007966667  | 0.736666667 | -0.905233333 |
| LOC100128086 | 0.720933333  | 0.532466667  | 0.673966667 | -0.629466667 |
| SLC16A10     | 0.4409       | 0.789266667  | 1.215833333 | -0.453766667 |
| TRIB1        | 1.0851       | 1.152433333  | 1.343766667 | -0.027633333 |
| APOLD1       | 0.3009       | 0.851633333  | 1.247766667 | -0.6687      |
| ATOX1        | 0.930633333  | 1.081333333  | 1.188666667 | -0.2123      |
| INPP4B       | 0.550033333  | 0.848566667  | 1.053533333 | -0.3901      |
| TPD52L1      | 0.634666667  | 0.642066667  | 1.2207      | -0.490266667 |
| RGS12        | 0.1352       | 0.6123       | 1.574       | -0.5797      |
| PPP2R2B      | 0.727733333  | 0.485        | -0.1771     | -0.912333333 |
| STX7         | 0.476533333  | 0.7221       | 1.063133333 | -0.628033333 |
| C21orf91     | 0.413933333  | 0.669166667  | 1.065466667 | -0.573533333 |
| RRAGD        | 0.303366667  | 0.393933333  | 0.699866667 | -0.909433333 |
| CD109        | 0.509666667  | 0.559033333  | 0.621166667 | -0.7155      |
| P8           | 0.084066667  | -0.049333333 | 0.077866667 | -1.275366667 |
| ITPKB        | 0.492        | 0.4237       | 0.675966667 | -0.815466667 |
| LDLRAD3      | 0.679166667  | 0.911        | 1.059666667 | -0.495366667 |
| FCRLA        | 0.658066667  | 0.474433333  | 0.581266667 | -0.556866667 |
| GAGE6        | 0.6237       | 0.686266667  | 0.722       | -0.6729      |
| TM4SF18      | 1.064333333  | 1.302666667  | 1.089966667 | -0.189333333 |
| CHD7         | 0.924166667  | 0.9244       | 0.976966667 | -0.468633333 |
| HIBCH        | 0.405966667  | 0.735466667  | 1.393933333 | -0.5128      |
| LOC730525    | 1.0288       | 1.202833333  | 1.945333333 | -0.2358      |
| RHOQ         | -0.058466667 | 0.315066667  | 0.777966667 | -1.0378      |
| TDRD3        | 0.310733333  | 0.677066667  | 1.198633333 | -0.598533333 |

|          |              |              |             |              |
|----------|--------------|--------------|-------------|--------------|
| PC       | 0.460166667  | 0.598        | 0.709466667 | -0.846466667 |
| RIPK5    | 0.590333333  | 0.823466667  | 1.1371      | -0.4197      |
| HLA-DPA1 | 0.3169       | 0.220366667  | 0.507       | -1.081033333 |
| SOX2     | 0.747833333  | 0.731666667  | 0.805266667 | -0.612566667 |
| ARAP3    | 0.9404       | 0.875933333  | 0.6197      | -0.5942      |
| ITGB8    | 1.189133333  | 1.413633333  | 1.019966667 | -0.096466667 |
| SLC45A2  | 0.439966667  | 0.852733333  | 1.4047      | -0.5862      |
| SLC27A1  | 0.359166667  | 0.396233333  | 0.820566667 | -0.938966667 |
| PARP9    | 0.340033333  | 0.6252       | 1.170333333 | -0.713333333 |
| CARHSP1  | 0.675633333  | 0.911633333  | 0.779533333 | -0.699466667 |
| HLA-DRB6 | 0.471066667  | 0.6394       | 0.705       | -0.811633333 |
| GAGE5    | 0.6211       | 0.564533333  | 0.6409      | -0.8511      |
| GAGE12I  | 0.719966667  | 0.820633333  | 0.8821      | -0.5733      |
| ST3GAL4  | 0.8549       | 0.691233333  | 0.619133333 | -0.5363      |
| RNF128   | 1.372566667  | 1.0752       | 0.465233333 | -0.375266667 |
| PLCB1    | 0.214466667  | 0.2054       | 0.237       | -1.2242      |
| NHP2L1   | 1.139466667  | 0.996066667  | 1.048266667 | -0.274566667 |
| PRR5     | 1.075366667  | 0.9005       | 1.0153      | -0.262733333 |
| ZNF22    | 0.6742       | 0.849166667  | 0.655533333 | -0.639466667 |
| CABLES1  | 0.644766667  | 0.601        | 0.832366667 | -0.765766667 |
| VAMP5    | 0.4516       | 0.772233333  | 1.012966667 | -0.741833333 |
| TGFBR3   | 0.947266667  | 1.358        | 1.5077      | -0.293666667 |
| CTSK     | -0.110366667 | -0.108366667 | 0.3463      | -1.410766667 |
| DAAM2    | 0.7732       | 0.979966667  | 1.2399      | -0.420566667 |
| C8orf55  | 0.316266667  | 0.581266667  | 0.787466667 | -0.901533333 |
| SIPA1L2  | 0.4006       | 0.808833333  | 0.9759      | -0.6072      |
| SNCA     | 0.602633333  | 0.538733333  | 1.025066667 | -0.663733333 |
| CSRP2    | 1.8219       | 1.561633333  | 0.796966667 | -0.169566667 |
| ATP6V1E2 | 0.3896       | 0.686733333  | 0.987133333 | -0.682333333 |
| C18orf19 | 1.260366667  | 1.318        | 1.5185      | -0.125166667 |
| COBLL1   | 0.5824       | 0.7125       | 0.796233333 | -0.709433333 |
| SLC43A3  | 1.4258       | 1.4693       | 1.6247      | -0.059666667 |
| C10orf58 | 0.4791       | 0.5383       | 0.810733333 | -0.956466667 |
| MGST2    | 0.383233333  | 0.602566667  | 0.885433333 | -0.995666667 |
| CHCHD10  | 0.560266667  | 0.5176       | 0.912666667 | -0.920933333 |
| FAR2     | 0.7924       | 0.9548       | 1.2202      | -0.505766667 |
| GAGE2B   | 0.6227       | 0.624866667  | 0.6949      | -0.879966667 |
| CXCL16   | 0.6587       | 0.4852       | 0.387233333 | -1.029466667 |
| BIRC7    | -0.025966667 | -0.0111      | 0.5674      | -1.390966667 |
| GAGE12G  | 0.826466667  | 0.713766667  | 0.867733333 | -0.677       |
| GPR137B  | 0.324133333  | 0.563433333  | 0.7724      | -0.945766667 |
| GAS1     | 1.015833333  | 0.554766667  | 0.3524      | -0.913266667 |
| KAT2B    | 0.618533333  | 0.846        | 1.121766667 | -0.704466667 |
| PLEKHA4  | 0.4703       | 0.546566667  | 0.606       | -0.998266667 |
| KIAA1598 | 0.992666667  | 0.932266667  | 0.9896      | -0.5386      |
| WDFY1    | 0.612766667  | 0.658733333  | 0.988566667 | -0.781433333 |
| SHC4     | 0.8009       | 0.7552       | 0.710266667 | -0.779833333 |



|              |             |             |              |              |
|--------------|-------------|-------------|--------------|--------------|
| HLA-DRB4     | 0.513233333 | 0.757033333 | 0.7829       | -0.858133333 |
| FAM89A       | 0.976566667 | 0.915166667 | 0.9034       | -0.545466667 |
| NUP50        | 1.176833333 | 1.188033333 | 1.271666667  | -0.283133333 |
| MAF          | 0.648933333 | 0.5687      | 0.5009       | -0.962233333 |
| SIRPA        | 0.559333333 | 0.718633333 | 1.070833333  | -0.724233333 |
| ALDH1A1      | 0.076133333 | 0.3059      | 1.082533333  | -1.259666667 |
| ALG6         | 0.630633333 | 1.0603      | 1.117066667  | -0.6601      |
| ARNT2        | 0.523666667 | 0.8635      | 1.3516       | -0.526833333 |
| ZFP106       | 0.445633333 | 0.832833333 | 1.4864       | -0.7551      |
| LGALS3       | 0.3363      | 0.5502      | 0.875433333  | -0.952766667 |
| TDRD7        | 0.678466667 | 1.0428      | 1.321633333  | -0.477866667 |
| S100A13      | 0.8142      | 0.749833333 | 0.810233333  | -0.806066667 |
| NUDT11       | 0.713033333 | 0.656533333 | 0.765        | -0.8922      |
| TBC1D4       | 1.694533333 | 1.310566667 | 1.4987       | 0.0085       |
| BAIAP2L2     | 1.1894      | 1.2843      | 1.205833333  | -0.272566667 |
| IL1RAP       | 1.694966667 | 1.631233333 | 1.537566667  | -0.068633333 |
| RNF144A      | 0.747233333 | 0.693533333 | 0.6821       | -0.861666667 |
| PPAP2B       | 1.442133333 | 1.457333333 | 1.474433333  | -0.285366667 |
| LOC100134073 | 1.9144      | 1.435966667 | 0.186333333  | -0.304533333 |
| IFI6         | 0.560266667 | 0.220433333 | 0.750266667  | -1.193533333 |
| AMOT         | 0.682933333 | 0.743266667 | 0.727766667  | -0.8958      |
| NLGN4X       | 0.690333333 | 0.650833333 | 1.679966667  | -0.640366667 |
| GAGE4        | 0.8462      | 0.8424      | 0.9461       | -0.7326      |
| MX1          | 0.3032      | 0.297033333 | 0.715866667  | -1.0252      |
| TRIM9        | 1.119933333 | 1.2223      | 0.8528       | -0.627466667 |
| RNF125       | 0.964766667 | 1.024066667 | 1.189633333  | -0.6894      |
| LRP5         | 0.989966667 | 1.062666667 | 1.119066667  | -0.5937      |
| CTHRC1       | 0.339866667 | 0.6394      | 0.699866667  | -1.131133333 |
| SLC25A4      | 1.409533333 | 1.442266667 | 1.579833333  | -0.2393      |
| LOC647886    | 1.0121      | 1.087       | 1.312266667  | -0.535       |
| DHRS3        | 1.057133333 | 1.310166667 | 1.218666667  | -0.541633333 |
| RNF144       | 0.7883      | 0.581933333 | 0.658833333  | -1.017466667 |
| PHACTR1      | 0.4658      | 0.223333333 | -0.302033333 | -1.55        |
| RAP1GAP      | 0.536866667 | 0.605333333 | 1.057133333  | -0.917566667 |
| HRK          | 0.677966667 | 0.620866667 | 0.820733333  | -0.9462      |
| C10orf90     | 0.9898      | 1.1464      | 1.260533333  | -0.576566667 |
| SRPX         | 0.803233333 | 0.664533333 | 0.9061       | -0.808666667 |
| LOC730415    | 0.6816      | 0.646366667 | 0.939766667  | -0.954433333 |
| RAB17        | 0.4816      | 0.601466667 | 1.416766667  | -1.043633333 |
| TUBB4        | 0.678633333 | 0.8496      | 1.4086       | -0.822033333 |
| HLA-DRA      | 0.3839      | 0.691866667 | 0.675466667  | -1.2258      |
| SPRY1        | 1.530133333 | 1.607566667 | 2.493833333  | -0.189966667 |
| NUPR1        | 0.1165      | -0.0309     | -0.0573      | -1.695766667 |
| QDPR         | 0.632433333 | 0.8109      | 1.137566667  | -0.9695      |
| LOC151162    | 0.900366667 | 0.8918      | 1.103666667  | -0.857366667 |
| ASB9         | 1.0975      | 1.209433333 | 1.332566667  | -0.4864      |
| SGK3         | 0.715966667 | 1.1572      | 1.420066667  | -0.754566667 |

|              |             |             |             |              |
|--------------|-------------|-------------|-------------|--------------|
| CAPG         | 0.7522      | 0.8541      | 1.428933333 | -0.833966667 |
| LOXL3        | 1.688866667 | 1.568766667 | 1.4475      | -0.168133333 |
| TESK2        | 0.420033333 | 0.849466667 | 1.491266667 | -0.925333333 |
| RHOJ         | 1.378733333 | 1.262       | 1.215266667 | -0.5563      |
| LYPD1        | 1.970966667 | 1.4499      | 0.372366667 | -0.223166667 |
| SGK1         | 0.841066667 | 0.8523      | 1.265466667 | -0.7594      |
| SGK          | 0.786933333 | 0.845266667 | 1.1324      | -0.701       |
| DYNC11I      | 0.650066667 | 0.942433333 | 1.399966667 | -0.900466667 |
| ITPK1        | 0.863966667 | 0.879933333 | 0.9446      | -0.9305      |
| DSTYK        | 0.6118      | 0.769766667 | 1.2506      | -0.926766667 |
| HMG20B       | 0.554833333 | 0.580966667 | 0.532833333 | -1.3254      |
| SCARB1       | 0.6393      | 0.777166667 | 1.1277      | -1.064333333 |
| ZNF689       | 1.589233333 | 1.718966667 | 1.808066667 | -0.093433333 |
| IMMP2L       | 0.950633333 | 0.8503      | 0.795       | -1.0436      |
| NBL1         | 1.0613      | 0.996033333 | 1.630133333 | -0.570733333 |
| NCK2         | 0.9066      | 1.1273      | 0.955966667 | -0.856766667 |
| IRS2         | 0.942733333 | 0.8695      | 0.531866667 | -0.996666667 |
| HSPA2        | 0.200166667 | 0.417033333 | 0.9063      | -1.571566667 |
| SLC22A18AS   | 1.4006      | 1.856733333 | 2.000466667 | 0.055133333  |
| MCOLN3       | 1.089233333 | 1.173666667 | 1.181       | -0.572066667 |
| TMEM64       | 1.201733333 | 1.079833333 | 1.184066667 | -0.661933333 |
| NPAS1        | 0.556233333 | 0.8729      | 1.365233333 | -0.969333333 |
| LEF1         | 1.3998      | 1.2994      | 1.299066667 | -0.4677      |
| LRRC33       | 1.5395      | 1.806233333 | 2.181333333 | 0.032133333  |
| FAM19A3      | 1.971566667 | 2.025       | 1.846933333 | -0.007433333 |
| EMX2         | 0.977966667 | 0.943333333 | 0.849433333 | -0.979366667 |
| LONRF1       | 0.613066667 | 0.8751      | 1.164033333 | -0.983033333 |
| GAB2         | 0.789       | 0.901366667 | 1.4222      | -0.987733333 |
| IRF4         | 1.076633333 | 1.082633333 | 1.259366667 | -0.7912      |
| C6orf192     | 0.596133333 | 0.956633333 | 1.3956      | -1.053533333 |
| LARGE        | 0.735833333 | 0.931233333 | 0.991066667 | -1.055666667 |
| CSPG4        | 0.894466667 | 0.9861      | 1.500766667 | -0.990966667 |
| LOC100133583 | 0.891566667 | 0.860266667 | 0.993433333 | -1.1951      |
| HLA-DMA      | 0.316       | 0.439033333 | 0.662633333 | -1.630066667 |
| PYGB         | 0.532266667 | 0.625066667 | 0.460033333 | -1.4106      |
| JPH1         | 1.269233333 | 1.333933333 | 1.2208      | -0.688366667 |
| PCDH7        | 0.634133333 | 0.935633333 | 1.074133333 | -1.0972      |
| MC1R         | 1.237433333 | 1.429166667 | 1.543066667 | -0.700566667 |
| PHLDA3       | 1.290133333 | 1.360566667 | 1.6105      | -0.5108      |
| AP1S2        | 0.885566667 | 0.916266667 | 1.302433333 | -0.9537      |
| GRAMD4       | 0.533166667 | 0.752833333 | 0.803       | -1.4261      |
| COL11A1      | 1.491466667 | 1.463833333 | 0.776133333 | -0.875366667 |
| FAM69B       | 0.7021      | 1.144166667 | 1.672766667 | -0.8261      |
| LAMA1        | 0.8814      | 1.0083      | 1.2082      | -0.875333333 |
| GJA3         | 0.794766667 | 0.952233333 | 1.244633333 | -1.001866667 |
| KANK1        | 1.307733333 | 1.238       | 1.4039      | -0.6516      |
| EPB41L3      | 1.2225      | 1.033766667 | 1.045633333 | -1.054333333 |

|           |             |             |             |              |
|-----------|-------------|-------------|-------------|--------------|
| CPN1      | 1.517733333 | 1.8117      | 2.702933333 | -0.0991      |
| PTGFRN    | 1.0916      | 1.268366667 | 1.1736      | -0.897166667 |
| PMP22     | 1.398466667 | 0.821066667 | 0.710166667 | -1.065133333 |
| POU3F2    | 2.353466667 | 2.052066667 | 1.579933333 | 0.0461       |
| NLGN1     | 1.137       | 1.1526      | 1.3502      | -0.809133333 |
| KIAA1026  | 1.002633333 | 1.3139      | 1.365766667 | -0.916466667 |
| THBS1     | 3.161066667 | 2.2301      | 0.6876      | 0.090366667  |
| SLC1A4    | 0.641666667 | 0.790266667 | 0.735333333 | -1.293033333 |
| CDK5R1    | 1.1709      | 1.216366667 | 1.734033333 | -0.7403      |
| TRIM63    | 0.647366667 | 0.713733333 | 1.5326      | -1.1248      |
| UCN2      | 2.1164      | 2.699166667 | 3.087433333 | 0.718666667  |
| MYH10     | 1.192166667 | 1.285333333 | 1.497233333 | -0.829       |
| SYNM      | 1.156666667 | 1.227366667 | 0.955833333 | -0.9656      |
| SERPINA3  | 0.959366667 | 0.660366667 | 0.793633333 | -1.171133333 |
| GHR       | 0.947366667 | 1.3293      | 1.641333333 | -0.930733333 |
| CTSH      | 0.6719      | 0.5889      | 0.722533333 | -1.5727      |
| SNX10     | 1.300566667 | 1.663       | 1.818333333 | -0.8271      |
| LZTS1     | 0.846333333 | 1.251866667 | 1.218       | -1.062766667 |
| PPP1R14C  | 1.692733333 | 2.0587      | 2.020966667 | -0.302866667 |
| RPS6KA5   | 1.353933333 | 1.168833333 | 1.352266667 | -1.052766667 |
| BAMBI     | 0.844366667 | 0.787266667 | 0.888033333 | -1.592766667 |
| SFRP1     | 1.988766667 | 1.918833333 | 1.894766667 | -0.673533333 |
| MITF      | 0.905266667 | 1.283266667 | 1.6293      | -1.288033333 |
| HLA-DMB   | 0.915       | 1.215766667 | 1.270766667 | -1.336533333 |
| PARD6G    | 1.1596      | 1.101633333 | 1.119133333 | -1.279833333 |
| TBC1D16   | 0.797133333 | 1.216       | 1.575366667 | -1.2602      |
| CYP27A1   | 0.4665      | 0.8861      | 1.133633333 | -1.5824      |
| PIR       | 0.485266667 | 0.839966667 | 1.3068      | -1.492266667 |
| FAM46C    | 2.6282      | 2.327       | 2.1647      | -0.044933333 |
| RPS6KA2   | 0.3421      | 0.6806      | 1.1221      | -1.6407      |
| STXBP6    | 0.9148      | 1.248533333 | 1.1476      | -1.307166667 |
| LYST      | 0.202733333 | 0.439433333 | 0.678833333 | -1.9134      |
| RAB38     | 0.897633333 | 1.330066667 | 1.855866667 | -1.126566667 |
| TNFRSF14  | 0.065366667 | 0.538133333 | 1.1201      | -1.891833333 |
| SLC7A8    | 0.8167      | 0.948566667 | 1.434933333 | -1.405633333 |
| EPHB1     | 1.386766667 | 1.579433333 | 1.7408      | -0.827266667 |
| PI15      | 1.5622      | 1.3082      | 2.258133333 | -0.873466667 |
| TNFRSF19  | 1.541       | 1.700933333 | 1.618466667 | -0.883633333 |
| FAM133A   | 1.399233333 | 1.4736      | 1.273033333 | -1.312233333 |
| FGF13     | 2.1564      | 1.890166667 | 1.892366667 | -0.7112      |
| ANKS1A    | 2.216533333 | 2.229066667 | 2.356033333 | -0.519566667 |
| ERBB3     | 1.375333333 | 1.271466667 | 1.398       | -1.430166667 |
| H1FO      | 1.896566667 | 1.684466667 | 1.450633333 | -1.0301      |
| LOC399940 | 2.474933333 | 2.386866667 | 2.266633333 | -0.447333333 |
| C19orf28  | 1.2649      | 1.136966667 | 1.195333333 | -1.4566      |
| ADAM23    | 1.172766667 | 1.348166667 | 1.555466667 | -1.3719      |
| VCY       | 1.7287      | 1.682166667 | 1.8305      | -1.2719      |

|           |             |             |             |              |
|-----------|-------------|-------------|-------------|--------------|
| SLC27A3   | 0.892266667 | 1.173133333 | 1.885166667 | -1.5829      |
| SEMA6A    | 1.209933333 | 1.454433333 | 2.039833333 | -1.2727      |
| FABP7     | 1.0661      | 1.306733333 | 2.424733333 | -1.3894      |
| HTRA1     | 0.561066667 | 0.4058      | 0.7677      | -2.207333333 |
| S100A1    | 1.394566667 | 1.507566667 | 1.544866667 | -1.385066667 |
| ST6GAL1   | 0.834466667 | 1.049533333 | 1.3807      | -2.0362      |
| VCX3A     | 1.697533333 | 1.7915      | 1.865366667 | -1.370266667 |
| VCX-C     | 1.738766667 | 1.764466667 | 1.865066667 | -1.467866667 |
| CD36      | 0.976033333 | 0.879133333 | 0.837766667 | -1.969666667 |
| SERGEF    | 1.181566667 | 1.624466667 | 1.884233333 | -1.4355      |
| VCX2      | 1.786566667 | 1.627933333 | 1.9128      | -1.496633333 |
| HES6      | 1.124       | 1.487566667 | 2.530766667 | -1.215166667 |
| VCX       | 1.8046      | 1.847       | 1.912933333 | -1.4048      |
| EDNRB     | 1.275233333 | 1.419066667 | 2.090266667 | -1.615366667 |
| SPRYD5    | 2.504266667 | 2.302533333 | 2.308566667 | -0.899033333 |
| GLDC      | 2.512366667 | 2.804766667 | 2.8733      | -0.5046      |
| TRIM2     | 1.3685      | 1.512       | 1.982066667 | -1.5879      |
| CXXC5     | 1.540233333 | 1.4955      | 1.424333333 | -1.802166667 |
| MGP       | 2.570066667 | 2.3142      | 2.821066667 | -0.8164      |
| GAS7      | 1.954966667 | 1.876533333 | 1.662866667 | -1.6445      |
| MIA       | 1.64        | 1.663333333 | 1.7201      | -1.936933333 |
| ROPN1B    | 1.744066667 | 1.625133333 | 1.721333333 | -1.927       |
| ROPN1     | 1.722166667 | 1.7257      | 1.7243      | -1.833633333 |
| OVOS2     | 1.798666667 | 2.254333333 | 2.562866667 | -1.764433333 |
| SILV      | 2.019966667 | 1.801566667 | 2.259       | -2.1096      |
| CEACAM1   | 2.1941      | 2.301566667 | 2.98        | -2.024966667 |
| PLP1      | 1.9814      | 2.2618      | 2.513633333 | -2.226433333 |
| SOX10     | 2.3776      | 2.4351      | 2.4958      | -2.4667      |
| LOC728715 | 2.674366667 | 3.100466667 | 3.324666667 | -2.793066667 |

| Skmel-28R sample 2 | Skmel-28R sample 3 | average RvS | ratio       |     |
|--------------------|--------------------|-------------|-------------|-----|
| 4.439466667        | 4.526433333        | 6.8386      | 114.4520902 | 427 |
| 3.536266667        | 3.525466667        | 6.487077778 | 89.70259261 | 368 |
| 3.151333333        | 3.3303             | 6.300477778 | 78.81934076 |     |
| 3.377866667        | 3.471533333        | 6.255188889 | 76.38348762 |     |
| 3.1987             | 3.259766667        | 6.077933333 | 67.55231628 |     |
| 3.293466667        | 3.417166667        | 6.058366667 | 66.64231751 |     |
| 3.350066667        | 3.368366667        | 6.009233333 | 64.41091732 |     |
| 3.1297             | 3.009466667        | 5.889122222 | 59.26556609 |     |
| 3.0464             | 3.224              | 5.665622222 | 50.76007241 |     |
| 3.203033333        | 3.143833333        | 5.619388889 | 49.15917806 |     |
| 2.954033333        | 3.107766667        | 5.3624      | 41.1380071  |     |
| 3.568666667        | 3.458733333        | 5.3148      | 39.80285468 |     |
| 2.9155             | 3.049433333        | 5.307955556 | 39.6144689  |     |
| 3.064833333        | 3.077              | 4.997611111 | 31.94705659 |     |
| 2.574333333        | 2.5866             | 4.961733333 | 31.16237603 |     |
| 1.927              | 2.062766667        | 4.930733333 | 30.49991535 |     |
| 2.645266667        | 2.650133333        | 4.804555556 | 27.94572223 |     |
| 3.047133333        | 3.272233333        | 4.718944444 | 26.33563689 |     |
| 2.239833333        | 1.974966667        | 4.564       | 23.6537989  |     |
| 2.172033333        | 2.346              | 4.525411111 | 23.02949884 |     |
| 2.1665             | 2.474866667        | 4.321044444 | 19.98775375 |     |
| 2.3325             | 2.016933333        | 4.136055556 | 17.58234453 |     |
| 2.514533333        | 2.6667             | 4.050755556 | 16.57291593 |     |
| 2.464533333        | 2.351333333        | 3.973655556 | 15.71048219 |     |
| 2.271133333        | 2.226366667        | 3.965411111 | 15.62095889 |     |
| 2.4537             | 2.5552             | 3.913044444 | 15.0641195  |     |
| 2.233933333        | 2.4283             | 3.787811111 | 13.81162449 |     |
| 1.7968             | 1.866533333        | 3.735466667 | 13.3194875  |     |
| 3.6318             | 3.439766667        | 3.683722222 | 12.85022952 |     |
| 2.822266667        | 2.9004             | 3.658122222 | 12.62421891 |     |
| 2.444066667        | 2.357866667        | 3.654266667 | 12.59052613 |     |
| 1.9161             | 1.966433333        | 3.614266667 | 12.24623753 |     |
| 1.684733333        | 1.818              | 3.596655556 | 12.09765531 |     |
| 2.162633333        | 2.074533333        | 3.543822222 | 11.6626378  |     |
| 1.514              | 1.723966667        | 3.511611111 | 11.40513099 |     |
| 1.722633333        | 1.709833333        | 3.5029      | 11.33647336 |     |
| 2.841533333        | 2.772733333        | 3.476066667 | 11.12756996 |     |
| 2.092966667        | 1.967566667        | 3.4641      | 11.03565228 |     |
| 1.715033333        | 1.563433333        | 3.448955556 | 10.92041332 |     |
| 2.157733333        | 2.160333333        | 3.436255556 | 10.82470314 |     |
| 1.8037             | 1.766766667        | 3.269411111 | 9.642525868 |     |
| 1.843833333        | 1.957566667        | 3.250566667 | 9.517394461 |     |
| 1.581066667        | 1.705666667        | 3.248033333 | 9.500696839 |     |
| 2.770733333        | 2.735166667        | 3.240855556 | 9.453545827 |     |
| 1.922066667        | 1.865433333        | 3.163222222 | 8.958282872 |     |
| 1.6155             | 1.742533333        | 3.145466667 | 8.848707043 |     |

|             |             |             |             |
|-------------|-------------|-------------|-------------|
| 1.868566667 | 1.9732      | 3.127655556 | 8.74013495  |
| 1.973766667 | 2.442533333 | 3.086066667 | 8.491778066 |
| 2.061133333 | 2.132266667 | 3.024677778 | 8.138019728 |
| 1.768966667 | 1.615866667 | 3.021855556 | 8.12211557  |
| 1.425033333 | 1.601166667 | 3.018188889 | 8.101499101 |
| 1.654833333 | 1.741133333 | 3.008955556 | 8.049814597 |
| 2.225033333 | 1.731333333 | 2.982588889 | 7.904032554 |
| 1.401366667 | 1.257866667 | 2.935866667 | 7.652158022 |
| 2.003166667 | 2.0454      | 2.932611111 | 7.634909791 |
| 1.4677      | 1.481466667 | 2.897555556 | 7.451627492 |
| 1.4481      | 1.593266667 | 2.887788889 | 7.401352297 |
| 1.937633333 | 2.0179      | 2.885466667 | 7.389448354 |
| 0.6842      | 0.772833333 | 2.876933333 | 7.345869839 |
| 1.2775      | 1.298166667 | 2.874522222 | 7.333603272 |
| 1.5722      | 1.530533333 | 2.863944444 | 7.280030247 |
| 1.643       | 1.800833333 | 2.7955      | 6.942715242 |
| 1.4833      | 1.789933333 | 2.760644444 | 6.776989069 |
| 1.3131      | 1.531266667 | 2.727911111 | 6.624957094 |
| 1.572033333 | 1.6592      | 2.719322222 | 6.585633482 |
| 2.234233333 | 2.176566667 | 2.7114      | 6.549569127 |
| 1.374166667 | 1.2351      | 2.682433333 | 6.41937719  |
| 1.9069      | 2.032366667 | 2.6818      | 6.416559745 |
| 1.451933333 | 1.503433333 | 2.671522222 | 6.371010531 |
| 1.8176      | 2.143733333 | 2.668688889 | 6.358510674 |
| 1.2853      | 1.250033333 | 2.664333333 | 6.339343017 |
| 0.806066667 | 0.823366667 | 2.627766667 | 6.180684687 |
| 1.290733333 | 1.3716      | 2.616555556 | 6.132841031 |
| 1.3501      | 1.240433333 | 2.612       | 6.113506083 |
| 1.205266667 | 1.276166667 | 2.588533333 | 6.014869069 |
| 1.2682      | 1.196733333 | 2.585233333 | 6.001126467 |
| 1.548166667 | 1.657633333 | 2.561566667 | 5.903484164 |
| 1.487866667 | 1.309166667 | 2.525544444 | 5.75790683  |
| 1.113966667 | 1.479466667 | 2.514133333 | 5.712543845 |
| 2.053966667 | 2.073933333 | 2.510911111 | 5.699799264 |
| 1.1428      | 1.2105      | 2.485966667 | 5.602095846 |
| 0.957666667 | 0.991333333 | 2.476622222 | 5.565927907 |
| 1.389533333 | 1.343166667 | 2.476077778 | 5.563827833 |
| 2.023233333 | 1.8726      | 2.441588889 | 5.432396899 |
| 1.316233333 | 1.176133333 | 2.435855556 | 5.410851156 |
| 1.534566667 | 1.3339      | 2.428477778 | 5.383251312 |
| 1.134466667 | 1.554433333 | 2.4205      | 5.353565302 |
| 1.339433333 | 1.364266667 | 2.417477778 | 5.342362152 |
| 1.2839      | 1.233066667 | 2.389322222 | 5.239111704 |
| 2.371733333 | 2.200133333 | 2.3873      | 5.231773198 |
| 1.535433333 | 1.3452      | 2.382066667 | 5.212829476 |
| 1.399833333 | 1.555966667 | 2.368588889 | 5.164357554 |
| 0.449566667 | 0.2611      | 2.349288889 | 5.095730181 |

|             |             |             |             |
|-------------|-------------|-------------|-------------|
| 1.397333333 | 1.357133333 | 2.342677778 | 5.072432556 |
| 1.295433333 | 1.525266667 | 2.335877778 | 5.048580405 |
| 1.051733333 | 1.0644      | 2.334133333 | 5.042479569 |
| 1.0832      | 1.105533333 | 2.298177778 | 4.918361503 |
| 1.4833      | 1.6451      | 2.295533333 | 4.909354456 |
| 1.2092      | 1.446133333 | 2.293566667 | 4.902666636 |
| 1.126       | 0.9189      | 2.281722222 | 4.862580797 |
| 1.204033333 | 1.153733333 | 2.279033333 | 4.85352638  |
| 1.636333333 | 1.5285      | 2.277855556 | 4.849565707 |
| 1.694633333 | 1.901       | 2.276966667 | 4.846578661 |
| 1.216733333 | 1.362333333 | 2.250422222 | 4.758220807 |
| 1.5752      | 1.4062      | 2.2494      | 4.754850562 |
| 1.702633333 | 1.716633333 | 2.246988889 | 4.746910632 |
| 0.929933333 | 1.129666667 | 2.237133333 | 4.714593332 |
| 0.634       | 0.8176      | 2.229277778 | 4.68899187  |
| 0.9461      | 0.792633333 | 2.228944444 | 4.687908608 |
| 1.2861      | 1.357633333 | 2.190755556 | 4.565445212 |
| 1.025466667 | 0.733       | 2.171022222 | 4.503423711 |
| 0.520833333 | 0.603866667 | 2.168211111 | 4.494657272 |
| 1.957666667 | 1.812       | 2.167722222 | 4.493134417 |
| 1.224733333 | 1.2994      | 2.127433333 | 4.369394394 |
| 1.442266667 | 1.355466667 | 2.116433333 | 4.336206111 |
| 1.533       | 1.608966667 | 2.111566667 | 4.32160336  |
| 1.3787      | 1.785433333 | 2.109944444 | 4.316746713 |
| 1.510866667 | 1.335466667 | 2.1091      | 4.314220755 |
| 1.041266667 | 1.314166667 | 2.101488889 | 4.291520497 |
| 0.7982      | 1.012       | 2.1008      | 4.289471779 |
| 1.502166667 | 1.539133333 | 2.096777778 | 4.277529421 |
| 0.979466667 | 1.053533333 | 2.094422222 | 4.270550998 |
| 1.7418      | 1.860966667 | 2.085622222 | 4.244581223 |
| 0.851466667 | 0.813333333 | 2.074966667 | 4.213346794 |
| 0.595       | 0.619366667 | 2.069388889 | 4.197088513 |
| 1.172766667 | 1.231966667 | 2.048255556 | 4.136055531 |
| 1.558133333 | 1.681633333 | 2.043311111 | 4.12190459  |
| 1.105366667 | 1.036133333 | 2.029322222 | 4.082130268 |
| 1.335633333 | 1.678833333 | 2.0252      | 4.070483018 |
| 0.889166667 | 0.839166667 | 2.0232      | 4.06484404  |
| 1.3322      | 1.503633333 | 2.000188889 | 4.000523745 |
| 0.708466667 | 0.905066667 | 1.998588889 | 3.996089482 |
| 1.2878      | 1.204833333 | 1.997166667 | 3.992152041 |
| 0.753166667 | 0.715666667 | 1.982822222 | 3.952655505 |
| 1.0292      | 1.1401      | 1.974711111 | 3.930495263 |
| 1.180333333 | 1.043933333 | 1.963811111 | 3.900911075 |
| 1.349433333 | 1.5038      | 1.959577778 | 3.889481319 |
| 1.3367      | 1.1184      | 1.957655556 | 3.884302492 |
| 1.852266667 | 1.9515      | 1.9562      | 3.88038554  |
| 0.765233333 | 0.69        | 1.956133333 | 3.880206232 |

|             |             |             |             |
|-------------|-------------|-------------|-------------|
| 1.184133333 | 1.314866667 | 1.953822222 | 3.87399535  |
| 1.6295      | 1.618566667 | 1.953477778 | 3.873070541 |
| 1.092933333 | 1.197033333 | 1.949244444 | 3.861722359 |
| 1.711466667 | 1.643366667 | 1.9467      | 3.85491754  |
| 1.489866667 | 1.524733333 | 1.943377778 | 3.846050692 |
| 1.0538      | 1.1195      | 1.942544444 | 3.843829767 |
| 1.396733333 | 1.238633333 | 1.940944444 | 3.839569187 |
| 1.3787      | 1.341866667 | 1.913255556 | 3.766581002 |
| 1.031366667 | 1.071566667 | 1.900455556 | 3.733310637 |
| 1.137366667 | 0.956533333 | 1.897477778 | 3.725612887 |
| 0.8886      | 0.8639      | 1.891655556 | 3.71060789  |
| 0.9855      | 0.9715      | 1.873144444 | 3.663301502 |
| 0.572066667 | 0.629333333 | 1.866166667 | 3.645626257 |
| 0.766133333 | 0.861266667 | 1.8509      | 3.607251469 |
| 1.400866667 | 1.5798      | 1.850166667 | 3.605418341 |
| 1.170166667 | 1.405233333 | 1.8479      | 3.599758194 |
| 0.7421      | 0.724       | 1.837211111 | 3.573186239 |
| 0.922333333 | 0.8298      | 1.835877778 | 3.56988544  |
| 2.0125      | 2.1274      | 1.833588889 | 3.564226175 |
| 0.790666667 | 0.833       | 1.823866667 | 3.540287851 |
| 1.010733333 | 1.097533333 | 1.8094      | 3.504964908 |
| 0.806433333 | 1.0065      | 1.798422222 | 3.478396086 |
| 0.776966667 | 0.893933333 | 1.795244444 | 3.470742767 |
| 0.982733333 | 1.021533333 | 1.790033333 | 3.458228826 |
| 0.745       | 0.811066667 | 1.786277778 | 3.449238236 |
| 0.8067      | 0.763866667 | 1.7853      | 3.446901327 |
| 0.5605      | 0.666666667 | 1.782811111 | 3.440959976 |
| 1.464033333 | 1.406033333 | 1.780722222 | 3.435981389 |
| 0.950333333 | 1.0232      | 1.779466667 | 3.432992408 |
| 1.1306      | 0.9775      | 1.775533333 | 3.423645517 |
| 0.808766667 | 0.642633333 | 1.760866667 | 3.389016514 |
| 0.872833333 | 0.793066667 | 1.7509      | 3.36568463  |
| 0.956966667 | 0.947066667 | 1.743088889 | 3.347511215 |
| 0.183133333 | 0.124766667 | 1.740611111 | 3.341766917 |
| 0.8219      | 0.8248      | 1.738366667 | 3.336572071 |
| 0.877166667 | 1.0182      | 1.733444444 | 3.32520767  |
| 1.2832      | 1.4667      | 1.723555556 | 3.302493119 |
| 0.086566667 | 0.154       | 1.699877778 | 3.248734348 |
| 1.253233333 | 1.323766667 | 1.695633333 | 3.239190537 |
| 0.950633333 | 0.660733333 | 1.688888889 | 3.224083009 |
| 0.9964      | 1.276633333 | 1.688688889 | 3.223636087 |
| 0.887566667 | 0.875633333 | 1.687655556 | 3.221327978 |
| 0.889533333 | 0.831766667 | 1.684055556 | 3.213299723 |
| 1.261666667 | 1.355666667 | 1.6819      | 3.208502261 |
| 0.869733333 | 0.7599      | 1.681622222 | 3.207884553 |
| 0.591366667 | 0.4694      | 1.680033333 | 3.204353546 |
| 1.1599      | 1.2334      | 1.676833333 | 3.197253939 |



|             |             |             |             |
|-------------|-------------|-------------|-------------|
| 0.869233333 | 0.786966667 | 1.672077778 | 3.186732182 |
| 0.960566667 | 1.0626      | 1.668333333 | 3.178471898 |
| 0.849766667 | 1.604933333 | 1.665777778 | 3.172846613 |
| 0.757466667 | 0.4213      | 1.663233333 | 3.167255676 |
| 0.5877      | 0.5292      | 1.662822222 | 3.166353262 |
| 0.418       | 0.163933333 | 1.659188889 | 3.158389041 |
| 0.981566667 | 0.7212      | 1.653188889 | 3.145280946 |
| 1.150166667 | 0.934666667 | 1.6457      | 3.128996403 |
| 0.4355      | 0.5059      | 1.6425      | 3.122063758 |
| 0.905966667 | 1.230033333 | 1.641511111 | 3.119924487 |
| 1.210166667 | 1.139266667 | 1.639866667 | 3.116370292 |
| 1.294433333 | 1.124633333 | 1.6396      | 3.115794317 |
| 0.5006      | 0.656033333 | 1.638611111 | 3.113659342 |
| 0.1144      | 0.2434      | 1.634122222 | 3.103986369 |
| 0.8492      | 0.994       | 1.631411111 | 3.098158839 |
| 0.851466667 | 0.656966667 | 1.620877778 | 3.075621091 |
| 0.571733333 | 0.537766667 | 1.6137      | 3.06035709  |
| 0.939366667 | 0.860066667 | 1.6012      | 3.033955657 |
| 0.736466667 | 0.7188      | 1.594911111 | 3.020759047 |
| 0.979766667 | 0.988866667 | 1.593111111 | 3.016992502 |
| 0.427766667 | 0.423266667 | 1.588144444 | 3.006623968 |
| 0.886233333 | 0.802666667 | 1.5872      | 3.004656359 |
| 0.852466667 | 0.9377      | 1.572155556 | 2.973486562 |
| 0.9405      | 1.2794      | 1.565533333 | 2.959869016 |
| 0.833166667 | 0.870066667 | 1.562122222 | 2.952878963 |
| 1.376033333 | 1.259366667 | 1.558877778 | 2.946245761 |
| 0.821366667 | 0.3026      | 1.5553      | 2.93894834  |
| 0.882333333 | 0.995066667 | 1.554233333 | 2.936776211 |
| 0.930666667 | 0.8021      | 1.547977778 | 2.924069856 |
| 0.9592      | 0.981866667 | 1.5426      | 2.913190408 |
| 1.2466      | 1.384733333 | 1.542311111 | 2.912607122 |
| 1.034466667 | 0.959       | 1.532377778 | 2.892621939 |
| 0.724333333 | 0.7952      | 1.526244444 | 2.880350631 |
| 0.5846      | 0.589633333 | 1.526177778 | 2.880217533 |
| 1.228033333 | 1.068       | 1.522422222 | 2.872729637 |
| 0.6566      | 0.796966667 | 1.518455556 | 2.864841962 |
| 1.3413      | 1.352833333 | 1.516055556 | 2.860080107 |
| 1.273666667 | 1.3856      | 1.515677778 | 2.859331277 |
| 0.251566667 | 0.213666667 | 1.514244444 | 2.856491911 |
| 0.987333333 | 0.866933333 | 1.507633333 | 2.84343206  |
| 0.725466667 | 0.950766667 | 1.502133333 | 2.832612653 |
| 0.924866667 | 1.031466667 | 1.500711111 | 2.829821613 |
| 1.1745      | 1.195866667 | 1.496922222 | 2.822399523 |
| 0.278566667 | 0.323666667 | 1.496366667 | 2.821312878 |
| 0.9219      | 0.961466667 | 1.491022222 | 2.810880697 |
| 0.695       | 0.744166667 | 1.490311111 | 2.809495542 |
| 1.003666667 | 0.953233333 | 1.487177778 | 2.803400329 |

|             |             |             |             |
|-------------|-------------|-------------|-------------|
| 1.269333333 | 1.263633333 | 1.486833333 | 2.802731095 |
| 0.991466667 | 0.9993      | 1.482177778 | 2.793701301 |
| 1.3083      | 1.247933333 | 1.479122222 | 2.787790643 |
| 0.9073      | 1.026633333 | 1.4742      | 2.778295398 |
| 1.3462      | 1.266033333 | 1.467466667 | 2.765358775 |
| 0.838533333 | 0.814633333 | 1.4658      | 2.762165952 |
| 0.758366667 | 0.9074      | 1.465033333 | 2.760698492 |
| 0.861133333 | 1.0456      | 1.459155556 | 2.749473831 |
| 0.763633333 | 0.812466667 | 1.443211111 | 2.719254366 |
| 0.6648      | 0.785733333 | 1.443122222 | 2.71908683  |
| 0.409833333 | 0.512666667 | 1.439911111 | 2.713041491 |
| 0.901833333 | 1.234166667 | 1.435311111 | 2.704404797 |
| 1.012666667 | 0.863966667 | 1.429744444 | 2.693989905 |
| 1.3938      | 1.1045      | 1.426655556 | 2.688228095 |
| 0.475333333 | 0.724933333 | 1.424       | 2.68328445  |
| 0.9055      | 0.834266667 | 1.417655556 | 2.671510256 |
| 1.530566667 | 1.307866667 | 1.417       | 2.670296607 |
| 0.803466667 | 1.016433333 | 1.414344444 | 2.665385937 |
| 1.1363      | 1.135466667 | 1.412477778 | 2.661939492 |
| 0.1545      | 0.0006      | 1.411333333 | 2.659828696 |
| 1.3339      | 1.3349      | 1.409055556 | 2.655632578 |
| 0.636133333 | 0.650366667 | 1.407955556 | 2.653608531 |
| 0.761833333 | 0.842766667 | 1.403133333 | 2.644753626 |
| 0.6241      | 0.635033333 | 1.3955      | 2.630797127 |
| 0.9049      | 0.686533333 | 1.3919      | 2.624240604 |
| 0.939333333 | 1.075233333 | 1.391588889 | 2.623674759 |
| 0.886333333 | 0.783633333 | 1.391488889 | 2.623492906 |
| 1.023933333 | 1.143466667 | 1.390788889 | 2.622220288 |
| 0.345833333 | 0.3508      | 1.389744444 | 2.620322609 |
| 1.090633333 | 0.9514      | 1.388544444 | 2.618143992 |
| 0.532633333 | 0.564333333 | 1.387866667 | 2.616914277 |
| 0.766733333 | 0.9335      | 1.386044444 | 2.613611023 |
| 0.845866667 | 0.7118      | 1.383744444 | 2.609447623 |
| 1.0306      | 1.056533333 | 1.382711111 | 2.60757927  |
| 0.939433333 | 0.861933333 | 1.367755556 | 2.580687683 |
| 0.868933333 | 0.971766667 | 1.363722222 | 2.573482946 |
| 0.808833333 | 0.5956      | 1.359755556 | 2.566416915 |
| 0.4661      | 0.481433333 | 1.357822222 | 2.562980003 |
| 0.756533333 | 0.552666667 | 1.356277778 | 2.560237731 |
| 0.523633333 | 0.6556      | 1.353411111 | 2.555155533 |
| 0.6516      | 0.6577      | 1.353355556 | 2.555057141 |
| 0.481133333 | 0.5495      | 1.351922222 | 2.552519924 |
| 0.871766667 | 0.918766667 | 1.348466667 | 2.546413422 |
| 0.648533333 | 0.790433333 | 1.341433333 | 2.534029524 |
| 0.886       | 0.8695      | 1.338355556 | 2.528629307 |
| 0.537966667 | 0.591933333 | 1.338044444 | 2.528084077 |
| 0.816266667 | 0.607766667 | 1.336233333 | 2.524912396 |

|              |             |             |             |
|--------------|-------------|-------------|-------------|
| 0.617066667  | 0.6079      | 1.332344444 | 2.518115477 |
| 0.348333333  | 0.452733333 | 1.329377778 | 2.512942704 |
| 0.7759       | 0.878333333 | 1.3289      | 2.51211063  |
| 0.428633333  | 0.391666667 | 1.3282      | 2.510892042 |
| 1.036033333  | 1.2725      | 1.3257      | 2.506544765 |
| 0.816        | 1.0266      | 1.325022222 | 2.505367468 |
| 1.148933333  | 1.127166667 | 1.321       | 2.498392251 |
| -0.019366667 | -0.0446     | 1.320633333 | 2.497757356 |
| 1.101233333  | 1.199566667 | 1.317433333 | 2.492223292 |
| 0.144433333  | 0.359666667 | 1.3119      | 2.482682891 |
| 0.893933333  | 0.85        | 1.306944444 | 2.47416968  |
| 0.578533333  | 0.643933333 | 1.3059      | 2.472379144 |
| 0.447833333  | 0.694733333 | 1.304566667 | 2.470095236 |
| 0.7058       | 0.762366667 | 1.3042      | 2.469467531 |
| 0.466466667  | 0.404666667 | 1.294122222 | 2.452277463 |
| 0.834433333  | 0.793566667 | 1.292044444 | 2.448748221 |
| 0.9957       | 0.811533333 | 1.288666667 | 2.44302168  |
| 0.465166667  | 0.4227      | 1.286222222 | 2.438885827 |
| 0.861033333  | 0.901966667 | 1.285       | 2.436820527 |
| 0.4019       | 0.268066667 | 1.281688889 | 2.431234224 |
| 0.263333333  | 0.188366667 | 1.277277778 | 2.423811959 |
| 0.884466667  | 0.8091      | 1.275077778 | 2.420118647 |
| 0.506166667  | 0.5697      | 1.272733333 | 2.416189039 |
| 0.283333333  | 0.378666667 | 1.272111111 | 2.415147182 |
| 1.104233333  | 1.0489      | 1.271711111 | 2.414477653 |
| 0.7254       | 0.749233333 | 1.271455556 | 2.414049997 |
| 0.920433333  | 0.721366667 | 1.264844444 | 2.403012985 |
| 0.343566667  | 0.278033333 | 1.261655556 | 2.397707305 |
| 0.7133       | 0.678633333 | 1.255111111 | 2.386855306 |
| 0.4714       | 0.476866667 | 1.249177778 | 2.377059108 |
| 0.5536       | 0.616533333 | 1.249166667 | 2.377040801 |
| 0.343466667  | 0.392766667 | 1.247188889 | 2.373784369 |
| 0.78         | 0.854566667 | 1.2457      | 2.371335842 |
| 0.6776       | 0.8385      | 1.243133333 | 2.367120802 |
| 1.022566667  | 0.721766667 | 1.238733333 | 2.359912442 |
| 0.469333333  | 0.437466667 | 1.234644444 | 2.353233443 |
| 1.114633333  | 1.144066667 | 1.234244444 | 2.352581079 |
| 0.444933333  | 0.6773      | 1.2301      | 2.345832494 |
| 0.7          | 0.4951      | 1.227677778 | 2.341897247 |
| 0.6826       | 0.4746      | 1.227455556 | 2.341536546 |
| 0.2227       | -0.0067     | 1.224466667 | 2.336690513 |
| 0.273233333  | 0.396233333 | 1.222088889 | 2.332842469 |
| 0.792333333  | 0.966       | 1.220444444 | 2.330184912 |
| 0.238033333  | 0.199666667 | 1.216611111 | 2.324001679 |
| 0.7592       | 0.8633      | 1.216544444 | 2.32389429  |
| 0.637833333  | 0.6832      | 1.213655556 | 2.319245521 |
| 0.5921       | 0.590266667 | 1.198111111 | 2.294390747 |

|              |              |             |             |
|--------------|--------------|-------------|-------------|
| 0.569933333  | 0.7158       | 1.197533333 | 2.293472062 |
| 0.530366667  | 0.558433333  | 1.196944444 | 2.292536088 |
| 0.991266667  | 1.0453       | 1.196755556 | 2.292235951 |
| 0.697333333  | 0.613766667  | 1.196344444 | 2.291582848 |
| 0.387233333  | 0.3798       | 1.196166667 | 2.291300482 |
| 0.918266667  | 1.1742       | 1.193722222 | 2.287421482 |
| 1.072866667  | 1.036633333  | 1.191488889 | 2.283883227 |
| -0.0228      | -0.0289      | 1.186844444 | 2.276542582 |
| 0.414        | 0.5366       | 1.1855      | 2.274422065 |
| 0.3976       | 0.600933333  | 1.182866667 | 2.270274377 |
| 0.433066667  | 0.3376       | 1.182077778 | 2.269033293 |
| 0.162233333  | 0.109666667  | 1.181266667 | 2.267757957 |
| 0.726466667  | 0.735633333  | 1.179544444 | 2.265052429 |
| 0.1898       | 0.423866667  | 1.178877778 | 2.264005994 |
| 0.098966667  | -0.151866667 | 1.176088889 | 2.259633648 |
| 0.7068       | 0.865766667  | 1.172266667 | 2.253654982 |
| 0.7172       | 0.910633333  | 1.168444444 | 2.247692136 |
| 0.814166667  | 0.835933333  | 1.168322222 | 2.247501724 |
| 0.049166667  | 0.145166667  | 1.167288889 | 2.245892522 |
| 0.6322       | 0.827566667  | 1.162944444 | 2.23913955  |
| 0.5528       | 0.519166667  | 1.1626      | 2.238605018 |
| 0.841033333  | 0.750966667  | 1.162588889 | 2.238587777 |
| 1.253933333  | 0.955066667  | 1.162544444 | 2.238518815 |
| -0.137066667 | -0.1033      | 1.161466667 | 2.236847135 |
| 0.8564       | 0.7495       | 1.158333333 | 2.231994285 |
| 0.366733333  | 0.4237       | 1.151211111 | 2.221002645 |
| 0.4123       | 0.5075       | 1.1498      | 2.218831327 |
| 0.884333333  | 0.5077       | 1.144488889 | 2.210677979 |
| 0.468266667  | 0.576666667  | 1.136166667 | 2.197962339 |
| 0.3672       | 0.467433333  | 1.134855556 | 2.195965754 |
| -0.011066667 | 0.2051       | 1.134433333 | 2.195323172 |
| 0.5311       | 0.373366667  | 1.134344444 | 2.195187915 |
| 0.384166667  | 0.6926       | 1.1321      | 2.19177545  |
| 0.7161       | 0.659966667  | 1.131255556 | 2.190492926 |
| 0.630866667  | 0.496766667  | 1.129655556 | 2.188064938 |
| 0.459333333  | 0.540166667  | 1.129533333 | 2.187879578 |
| 0.685733333  | 0.688166667  | 1.128666667 | 2.186565653 |
| 0.600766667  | 0.6594       | 1.127477778 | 2.184764501 |
| 0.3953       | 0.458366667  | 1.1225      | 2.177239326 |
| 1.089966667  | 0.942266667  | 1.118533333 | 2.171261264 |
| 0.9602       | 1.0147       | 1.116588889 | 2.168336839 |
| 0.8437       | 0.798466667  | 1.115744444 | 2.16706803  |
| 0.5715       | 0.375933333  | 1.111777778 | 2.161117896 |
| 0.511933333  | 0.3251       | 1.108433333 | 2.156113811 |
| 0.563066667  | 0.541333333  | 1.107911111 | 2.155333489 |
| 0.731333333  | 0.594866667  | 1.107422222 | 2.154603231 |
| 0.9379       | 0.942833333  | 1.104277778 | 2.149912252 |

|              |             |             |             |
|--------------|-------------|-------------|-------------|
| 0.1623       | 0.1097      | 1.104222222 | 2.149829464 |
| 0.802733333  | 0.733133333 | 1.103488889 | 2.148736967 |
| 0.7924       | 0.591766667 | 1.099011111 | 2.142078144 |
| 0.712833333  | 0.7417      | 1.098911111 | 2.141929671 |
| 0.855933333  | 0.844466667 | 1.098233333 | 2.14092363  |
| 0.8746       | 0.964233333 | 1.0979      | 2.140429028 |
| 1.098633333  | 1.150166667 | 1.090644444 | 2.129691475 |
| 0.405033333  | 0.843466667 | 1.086555556 | 2.123664045 |
| 0.600866667  | 0.4359      | 1.085877778 | 2.122666582 |
| 0.647166667  | 0.6672      | 1.084311111 | 2.120362765 |
| 0.407866667  | 0.585633333 | 1.082788889 | 2.118126699 |
| 0.628366667  | 0.6431      | 1.081066667 | 2.115599686 |
| 0.7196       | 0.6453      | 1.079044444 | 2.112636333 |
| 0.549933333  | 0.542333333 | 1.078933333 | 2.112473631 |
| 0.577966667  | 0.6527      | 1.078455556 | 2.111774159 |
| 0.812466667  | 0.671666667 | 1.076644444 | 2.109124771 |
| 0.316866667  | 0.489333333 | 1.0756      | 2.107598415 |
| 0.763466667  | 0.667466667 | 1.070688889 | 2.100436089 |
| 0.5975       | 0.6952      | 1.069177778 | 2.098237197 |
| 0.811033333  | 0.785366667 | 1.064966667 | 2.092121541 |
| 0.550933333  | 1.0306      | 1.064377778 | 2.091267739 |
| 0.5787       | 0.596033333 | 1.0635      | 2.089995738 |
| 0.662133333  | 0.689266667 | 1.0593      | 2.083920152 |
| 0.531066667  | 0.763166667 | 1.056811111 | 2.080328142 |
| 0.916166667  | 0.933       | 1.055788889 | 2.078854647 |
| 0.747666667  | 0.6006      | 1.053766667 | 2.075942763 |
| 0.622733333  | 0.707733333 | 1.053166667 | 2.075079582 |
| -0.057766667 | 0.056633333 | 1.0527      | 2.074408467 |
| 0.771533333  | 0.899066667 | 1.051722222 | 2.073003026 |
| 0.533166667  | 0.403       | 1.051522222 | 2.072715666 |
| 0.944166667  | 0.998533333 | 1.051477778 | 2.072651814 |
| 0.4552       | 0.4586      | 1.043922222 | 2.061825479 |
| 0.679466667  | 0.684566667 | 1.037433333 | 2.052572717 |
| 0.7598       | 0.6659      | 1.036533333 | 2.051292654 |
| 0.464133333  | 0.110633333 | 1.031722222 | 2.044463381 |
| 0.430666667  | 0.1929      | 1.0316      | 2.044290185 |
| 0.483766667  | 0.496366667 | 1.027322222 | 2.038237578 |
| 0.390833333  | 0.6327      | 1.024444444 | 2.034175909 |
| 0.3404       | 0.274733333 | 1.023255556 | 2.032500286 |
| 0.734633333  | 0.762533333 | 1.0229      | 2.031999434 |
| 0.959233333  | 0.820533333 | 1.022766667 | 2.031811646 |
| 0.505833333  | 0.5287      | 1.0195      | 2.027216258 |
| 0.6248       | 0.586333333 | 1.018222222 | 2.025421572 |
| -0.019833333 | 0.080866667 | 1.0165      | 2.02300516  |
| 0.743566667  | 0.728833333 | 1.015388889 | 2.021447715 |
| 0.3456       | 0.034266667 | 1.014255556 | 2.019860357 |
| 0.534333333  | 0.5894      | 1.013788889 | 2.019207101 |

|              |              |             |             |
|--------------|--------------|-------------|-------------|
| 0.0942       | 0.067733333  | 1.0123      | 2.017124315 |
| 0.6526       | 0.5901       | 1.006688889 | 2.009294298 |
| 0.3956       | 0.2925       | 1.005566667 | 2.007731946 |
| 0.117433333  | 0.081066667  | 1.0033      | 2.004580008 |
| 1.164233333  | 1.105533333  | 1.000344444 | 2.000477558 |
| 0.172666667  | 0.340733333  | 0.997222222 | 1.996152887 |
| 1.005433333  | 1.034333333  | 0.996033333 | 1.994508585 |
| 0.5265       | 0.593366667  | 0.995288889 | 1.993479665 |
| 0.528233333  | 0.753566667  | 0.991155556 | 1.987776503 |
| 0.444166667  | 0.5537       | 0.991111111 | 1.987715267 |
| 0.5667       | 0.554766667  | 0.989822222 | 1.985940256 |
| 0.736166667  | 0.865766667  | 0.988711111 | 1.984411346 |
| 0.956133333  | 0.907033333  | 0.987666667 | 1.982975244 |
| 0.6495       | 0.976666667  | 0.984677778 | 1.978871288 |
| 0.3013       | 0.253433333  | 0.984533333 | 1.97867317  |
| 0.808833333  | 0.862833333  | 0.9826      | 1.976023357 |
| -0.0195      | -0.1091      | 0.981177778 | 1.974076335 |
| 0.7662       | 0.698466667  | 0.978611111 | 1.970567422 |
| 0.4464       | 0.3372       | 0.9786      | 1.970552245 |
| 0.320566667  | 0.345166667  | 0.974555556 | 1.965035744 |
| 0.963233333  | 1.021566667  | 0.973744444 | 1.963931274 |
| 0.434166667  | 0.5102       | 0.973588889 | 1.963719528 |
| 0.1859       | -0.254866667 | 0.973155556 | 1.963129787 |
| 0.4175       | 0.4273       | 0.973011111 | 1.962933245 |
| 0.5781       | 0.433433333  | 0.972988889 | 1.96290301  |
| 0.358        | 0.445333333  | 0.972077778 | 1.961663761 |
| 0.771466667  | 1.045933333  | 0.971866667 | 1.96137673  |
| 0.518433333  | 0.820266667  | 0.970711111 | 1.959806355 |
| -0.117966667 | -0.146433333 | 0.970655556 | 1.959730888 |
| 0.475066667  | 0.3645       | 0.968377778 | 1.956639237 |
| 0.674933333  | 0.873666667  | 0.968044444 | 1.956187209 |
| -0.038166667 | -0.095533333 | 0.967188889 | 1.955027484 |
| 0.5085       | 0.456266667  | 0.966344444 | 1.953883493 |
| 0.096        | 0.2237       | 0.963277778 | 1.949734629 |
| 0.623466667  | 0.682066667  | 0.963133333 | 1.949539429 |
| 0.4292       | 0.420033333  | 0.960511111 | 1.945999192 |
| 0.3372       | 0.3241       | 0.960366667 | 1.945804366 |
| 0.079        | 0.100666667  | 0.959133333 | 1.944141645 |
| 0.5738       | 0.696633333  | 0.958588889 | 1.943408102 |
| 0.900233333  | 1.1277       | 0.958355556 | 1.943093812 |
| 0.810933333  | 0.8447       | 0.957855556 | 1.942420504 |
| 0.723333333  | 0.8397       | 0.957777778 | 1.942315788 |
| -0.002633333 | -0.082166667 | 0.957066667 | 1.941358647 |
| 0.175733333  | 0.1          | 0.953133333 | 1.936072977 |
| 0.396966667  | 0.5673       | 0.951566667 | 1.933971677 |
| 0.865033333  | 0.763866667  | 0.9508      | 1.932944213 |
| 0.4222       | 0.496466667  | 0.949188889 | 1.930786827 |

|              |              |             |             |
|--------------|--------------|-------------|-------------|
| 0.030766667  | 0.036566667  | 0.943933333 | 1.92376601  |
| 0.542        | 0.547433333  | 0.943466667 | 1.923143833 |
| 0.625933333  | 0.525266667  | 0.940822222 | 1.91962196  |
| 0.324766667  | 0.2617       | 0.939711111 | 1.918144106 |
| 0.1002       | -0.038866667 | 0.937688889 | 1.915457332 |
| 0.7229       | 0.8272       | 0.934844444 | 1.911684501 |
| 0.615866667  | 0.522        | 0.932       | 1.907919101 |
| 0.348466667  | 0.496666667  | 0.931911111 | 1.907801552 |
| 0.1069       | -0.027766667 | 0.930722222 | 1.906230028 |
| 0.890466667  | 0.733666667  | 0.926222222 | 1.900293451 |
| 0.803333333  | 0.594233333  | 0.924155556 | 1.897573221 |
| 0.734533333  | 0.767766667  | 0.923533333 | 1.89675499  |
| 0.490766667  | 0.638666667  | 0.920755556 | 1.893106475 |
| 0.481        | 0.204533333  | 0.920355556 | 1.892581667 |
| 0.331333333  | 0.312833333  | 0.920133333 | 1.89229017  |
| 0.7537       | 0.536833333  | 0.918222222 | 1.889785148 |
| 0.119566667  | 0.137366667  | 0.916433333 | 1.887443336 |
| 0.5488       | 0.569566667  | 0.913811111 | 1.884015862 |
| 0.430533333  | 0.536233333  | 0.912844444 | 1.882753914 |
| 0.225333333  | 0.8049       | 0.912277778 | 1.882014545 |
| 0.411566667  | 0.369633333  | 0.911788889 | 1.881376891 |
| 0.469733333  | 0.666366667  | 0.909877778 | 1.878886316 |
| -0.013533333 | -0.005666667 | 0.9074      | 1.875662165 |
| 0.358466667  | 0.3286       | 0.9045      | 1.871895633 |
| 0.0963       | -0.0648      | 0.903433333 | 1.870512145 |
| 0.282033333  | -0.057433333 | 0.903433333 | 1.870512145 |
| 0.541233333  | 0.237666667  | 0.903411111 | 1.870483333 |
| -0.1036      | 0.112466667  | 0.903233333 | 1.870252855 |
| 0.559266667  | 0.277033333  | 0.903166667 | 1.870166433 |
| 0.7625       | 0.626933333  | 0.900177778 | 1.866295945 |
| 0.013166667  | -0.1761      | 0.896722222 | 1.861831127 |
| 0.2242       | 0.206966667  | 0.896133333 | 1.861071307 |
| 0.374233333  | 0.217766667  | 0.892211111 | 1.856018526 |
| 0.1772       | 0.132166667  | 0.887466667 | 1.849924852 |
| 0.1606       | 0.2669       | 0.886122222 | 1.848201714 |
| 0.183233333  | 0.244966667  | 0.885933333 | 1.847959749 |
| 0.349366667  | 0.361233333  | 0.883922222 | 1.845385495 |
| 0.0218       | 0.271866667  | 0.882755556 | 1.843893787 |
| 0.3797       | 0.5816       | 0.877033333 | 1.836594758 |
| 0.648066667  | 0.619633333  | 0.876877778 | 1.836396742 |
| 0.420566667  | 0.623733333  | 0.875744444 | 1.834954696 |
| 0.3533       | 0.191333333  | 0.8754      | 1.834516652 |
| 0.5874       | 0.501933333  | 0.875344444 | 1.834446009 |
| 0.178766667  | 0.122933333  | 0.873833333 | 1.832525575 |
| 0.301066667  | 0.492533333  | 0.873544444 | 1.832158663 |
| 0.260766667  | 0.286233333  | 0.872688889 | 1.831072467 |
| 0.666333333  | 0.860533333  | 0.869077778 | 1.826494966 |

|              |              |             |             |
|--------------|--------------|-------------|-------------|
| 0.117966667  | 0.537133333  | 0.8681      | 1.82525749  |
| 0.230466667  | 0.091933333  | 0.867811111 | 1.824892032 |
| 0.544        | 0.6176       | 0.867566667 | 1.824582856 |
| 0.3777       | 0.366266667  | 0.865277778 | 1.821690383 |
| 0.210533333  | 0.049166667  | 0.865188889 | 1.821578147 |
| 0.6625       | 0.663033333  | 0.863855556 | 1.819895429 |
| 0.297033333  | 0.2364       | 0.862666667 | 1.818396316 |
| -0.0315      | 0.04         | 0.858844444 | 1.813585101 |
| 0.3303       | 0.5512       | 0.8586      | 1.813277841 |
| 0.515966667  | 0.466933333  | 0.857966667 | 1.812481999 |
| 0.762766667  | 0.873133333  | 0.8579      | 1.812398246 |
| 0.501966667  | 0.039666667  | 0.855966667 | 1.809971106 |
| 0.7202       | 0.862533333  | 0.855866667 | 1.809845653 |
| 0.6924       | 0.405433333  | 0.853866667 | 1.807338412 |
| 1.0942       | 1.349833333  | 0.851588889 | 1.804487174 |
| 0.602366667  | 0.4037       | 0.850888889 | 1.803611844 |
| 0.457866667  | 0.568633333  | 0.849811111 | 1.802264943 |
| 0.166733333  | 0.108166667  | 0.846822222 | 1.798534984 |
| 0.434366667  | 0.325466667  | 0.846788889 | 1.79849343  |
| 0.3996       | 0.366533333  | 0.845811111 | 1.797274925 |
| 0.712533333  | 0.614066667  | 0.844644444 | 1.795822107 |
| 0.060133333  | 0.115133333  | 0.844166667 | 1.795227482 |
| 0.116766667  | 0.3678       | 0.843433333 | 1.794315186 |
| 0.642766667  | 0.7081       | 0.842277778 | 1.792878568 |
| 0.134033333  | 0.159        | 0.840422222 | 1.790574098 |
| 0.335866667  | 0.455533333  | 0.840122222 | 1.790201798 |
| 0.695933333  | 0.747966667  | 0.8392      | 1.789057802 |
| 0.372033333  | 0.4311       | 0.837944444 | 1.78750149  |
| 0.4017       | 0.5878       | 0.837622222 | 1.787102301 |
| 0.358066667  | -0.207233333 | 0.837066667 | 1.786414253 |
| 0.151766667  | 0.379566667  | 0.836866667 | 1.78616662  |
| 0.726166667  | 0.7475       | 0.836622222 | 1.785864005 |
| 0.309333333  | 0.1913       | 0.836011111 | 1.785107691 |
| 0.273466667  | 0.505366667  | 0.835866667 | 1.784928973 |
| 0.699666667  | 0.5898       | 0.835622222 | 1.784626567 |
| 0.139633333  | 0.2961       | 0.835366667 | 1.784310471 |
| 0.602366667  | 0.7543       | 0.834944444 | 1.783788347 |
| 0.676566667  | 0.673433333  | 0.834155556 | 1.78281321  |
| 0.3813       | 0.428533333  | 0.833488889 | 1.781989565 |
| 0.4382       | 0.4321       | 0.832822222 | 1.781166301 |
| 0.5173       | 0.459        | 0.832188889 | 1.780384553 |
| 0.377166667  | 0.3429       | 0.829877778 | 1.777534767 |
| -0.0885      | 0.1287       | 0.829166667 | 1.776658828 |
| -0.000466667 | 0.048666667  | 0.826755556 | 1.773692058 |
| 0.3869       | 0.377366667  | 0.825577778 | 1.772244654 |
| 0.706733333  | 0.703333333  | 0.825466667 | 1.772108167 |
| 0.258266667  | 0.0455       | 0.824422222 | 1.770825707 |



|              |              |             |             |
|--------------|--------------|-------------|-------------|
| 0.4215       | 0.419933333  | 0.824066667 | 1.770389337 |
| 0.325966667  | 0.4537       | 0.822644444 | 1.76864493  |
| 0.63         | 0.489866667  | 0.822277778 | 1.768195479 |
| 0.5858       | 0.396533333  | 0.821633333 | 1.767405812 |
| 0.185566667  | 0.4451       | 0.820966667 | 1.766589286 |
| 0.2366       | 0.1972       | 0.820266667 | 1.765732339 |
| 0.2999       | 0.229533333  | 0.819066667 | 1.764264255 |
| 0.235633333  | 0.2263       | 0.8179      | 1.762838121 |
| 0.339433333  | 0.398666667  | 0.815011111 | 1.759311701 |
| 0.4144       | 0.6892       | 0.813955556 | 1.758024962 |
| 0.2604       | 0.362466667  | 0.8132      | 1.757104506 |
| 0.450533333  | 0.5821       | 0.812366667 | 1.756089856 |
| 0.640266667  | 0.572266667  | 0.812166667 | 1.755846427 |
| 0.101766667  | 0.093866667  | 0.810033333 | 1.753251951 |
| 0.532033333  | 0.397833333  | 0.809044444 | 1.752050604 |
| 0.5526       | 0.398        | 0.8086      | 1.751510941 |
| 0.357033333  | 0.4249       | 0.808444444 | 1.751322098 |
| 0.554533333  | 0.573533333  | 0.808055556 | 1.75085008  |
| 0.391766667  | 0.4661       | 0.807544444 | 1.750229907 |
| 0.532933333  | 0.5202       | 0.8075      | 1.750175989 |
| -0.152366667 | -0.024266667 | 0.806444444 | 1.748895932 |
| 0.4279       | 0.773866667  | 0.804977778 | 1.74711888  |
| 0.4608       | 0.5638       | 0.804622222 | 1.746688352 |
| 0.498633333  | 0.2905       | 0.803788889 | 1.745679716 |
| -0.0175      | 0.043733333  | 0.803133333 | 1.744886666 |
| 0.409233333  | 0.500866667  | 0.803088889 | 1.744832913 |
| 0.230566667  | 0.233733333  | 0.803022222 | 1.744752286 |
| 0.084866667  | 0.337833333  | 0.8026      | 1.744241738 |
| 0.1409       | 0.200066667  | 0.798188889 | 1.738916778 |
| 0.416533333  | 0.394233333  | 0.796944444 | 1.737417464 |
| 0.3225       | 0.351866667  | 0.795822222 | 1.736066513 |
| 0.2798       | 0.294233333  | 0.793955556 | 1.733821713 |
| 0.230766667  | 0.2436       | 0.793222222 | 1.732940622 |
| 0.750233333  | 0.7173       | 0.791366667 | 1.730713193 |
| 0.197533333  | 0.3889       | 0.791266667 | 1.730593233 |
| 0.654466667  | 0.7937       | 0.789066667 | 1.727956221 |
| 0.330033333  | 0.116        | 0.788688889 | 1.727503806 |
| 0.3874       | 0.485033333  | 0.786477778 | 1.724858217 |
| 0.538333333  | 0.478033333  | 0.786466667 | 1.724844933 |
| 0.3154       | 0.3129       | 0.786333333 | 1.724685531 |
| 0.400433333  | 0.4599       | 0.785611111 | 1.723822359 |
| -0.044866667 | 0.132733333  | 0.785166667 | 1.72329139  |
| 0.3565       | 0.289633333  | 0.783833333 | 1.721699467 |
| 0.186433333  | 0.290066667  | 0.783033333 | 1.720745018 |
| 0.6143       | 0.655333333  | 0.781577778 | 1.71900981  |
| 0.647133333  | 0.810833333  | 0.781388889 | 1.718784758 |
| 0.516766667  | 0.4921       | 0.7813      | 1.718678862 |

|              |              |             |             |
|--------------|--------------|-------------|-------------|
| 0.2163       | 0.2854       | 0.780477778 | 1.71769963  |
| 0.844033333  | 0.684        | 0.7791      | 1.716060005 |
| 0.2868       | 0.250066667  | 0.776933333 | 1.713484728 |
| 0.1662       | 0.1014       | 0.776488889 | 1.712956944 |
| 0.372333333  | 0.488966667  | 0.776233333 | 1.712653542 |
| 0.2808       | 0.2417       | 0.776144444 | 1.712548023 |
| 0.318433333  | 0.193966667  | 0.775822222 | 1.712165572 |
| 0.156166667  | -0.1195      | 0.775711111 | 1.712033713 |
| 0.5048       | 0.462333333  | 0.775355556 | 1.71161183  |
| 0.083133333  | 0.175166667  | 0.773633333 | 1.709569807 |
| 0.126933333  | 0.205266667  | 0.772244444 | 1.707924788 |
| 0.132366667  | 0.012133333  | 0.77        | 1.705269784 |
| -0.102566667 | -0.252766667 | 0.7663      | 1.700901976 |
| 0.663066667  | 0.4531       | 0.7656      | 1.700076893 |
| 0.7117       | 0.203666667  | 0.765544444 | 1.700011428 |
| 0.483433333  | 0.398        | 0.762422222 | 1.69633631  |
| 0.222766667  | 0.220833333  | 0.762022222 | 1.695866051 |
| 0.146533333  | 0.156966667  | 0.760466667 | 1.694038505 |
| 0.2997       | 0.421066667  | 0.759166667 | 1.692512709 |
| 0.373566667  | 0.598466667  | 0.758355556 | 1.691561413 |
| 0.5405       | 0.3838       | 0.758255556 | 1.691444167 |
| 0.065533333  | 0.2976       | 0.757577778 | 1.690649713 |
| 0.161233333  | 0.001866667  | 0.7575      | 1.69055857  |
| 0.583633333  | 0.507166667  | 0.757311111 | 1.690337244 |
| 0.084166667  | 0.3809       | 0.756522222 | 1.689413193 |
| 0.277766667  | 0.3884       | 0.755644444 | 1.688385617 |
| 0.1256       | 0.060633333  | 0.755411111 | 1.688112569 |
| 0.429666667  | 0.6341       | 0.755266667 | 1.687943562 |
| -0.065233333 | 0.037633333  | 0.7546      | 1.687163746 |
| 0.187633333  | 0.2036       | 0.754566667 | 1.687124765 |
| 0.470966667  | 0.2703       | 0.754433333 | 1.686968849 |
| 0.377566667  | 0.397966667  | 0.7525      | 1.684709682 |
| 0.463566667  | 0.289266667  | 0.752155556 | 1.684307504 |
| 0.3968       | 0.355866667  | 0.751777778 | 1.683866517 |
| 0.251966667  | 0.440766667  | 0.751633333 | 1.683697934 |
| 0.381766667  | 0.377933333  | 0.751244444 | 1.683244143 |
| 0.424366667  | 0.31         | 0.750533333 | 1.682414668 |
| 1.093433333  | 0.978533333  | 0.75        | 1.681792831 |
| 0.348866667  | 0.429366667  | 0.749922222 | 1.681702165 |
| 0.536433333  | 0.5409       | 0.749566667 | 1.681287757 |
| 0.556        | 0.507366667  | 0.7492      | 1.680860505 |
| 0.1977       | 0.232366667  | 0.749144444 | 1.680795779 |
| 0.082533333  | -0.039466667 | 0.746677778 | 1.677924472 |
| 0.439766667  | 0.66         | 0.743144444 | 1.673820062 |
| 0.321533333  | 0.378433333  | 0.742755556 | 1.673368932 |
| 0.570433333  | 0.5413       | 0.741788889 | 1.67224808  |
| 0.289166667  | 0.184666667  | 0.740755556 | 1.671050758 |

|              |              |             |             |
|--------------|--------------|-------------|-------------|
| 0.1238       | 0.102966667  | 0.739266667 | 1.669327091 |
| 0.3024       | 0.6054       | 0.739088889 | 1.669121399 |
| 0.106633333  | -0.319366667 | 0.738288889 | 1.668196098 |
| 0.628066667  | 0.462        | 0.737655556 | 1.667463932 |
| 0.507533333  | 0.167433333  | 0.736677778 | 1.666334201 |
| 0.647933333  | 0.714266667  | 0.736422222 | 1.666039057 |
| 0.2151       | 0.040766667  | 0.736311111 | 1.66591075  |
| 0.515833333  | 0.4055       | 0.734866667 | 1.664243654 |
| 0.020066667  | -0.055133333 | 0.733555556 | 1.662731888 |
| 0.3611       | 0.278966667  | 0.732611111 | 1.661643755 |
| 0.3709       | 0.344366667  | 0.732288889 | 1.661272672 |
| 0.406933333  | 0.434333333  | 0.732222222 | 1.661195907 |
| -0.022633333 | 0.099633333  | 0.731722222 | 1.66062028  |
| 0.146533333  | 0.148833333  | 0.731488889 | 1.660351722 |
| 0.5836       | 0.511433333  | 0.730611111 | 1.659341823 |
| 0.3713       | 0.397933333  | 0.729811111 | 1.658421944 |
| 0.1212       | 0.1909       | 0.728755556 | 1.657208994 |
| -0.061166667 | 0.066666667  | 0.728388889 | 1.656787862 |
| 0.0052       | 0.205933333  | 0.727833333 | 1.656149986 |
| 0.6221       | 0.6709       | 0.7275      | 1.655767378 |
| -0.022633333 | 0.0667       | 0.727166667 | 1.655384859 |
| 0.732466667  | 0.701366667  | 0.726588889 | 1.654722035 |
| 0.181066667  | 0.222866667  | 0.726177778 | 1.654250571 |
| 0.174033333  | 0.2037       | 0.726044444 | 1.654097693 |
| 0.331633333  | 0.183966667  | 0.723066667 | 1.650687093 |
| -0.002566667 | 0.056433333  | 0.7228      | 1.65038201  |
| 0.128366667  | 0.204833333  | 0.720722222 | 1.648006831 |
| 0.114933333  | 0.2062       | 0.720633333 | 1.647905295 |
| 0.628266667  | 0.729166667  | 0.719477778 | 1.646585901 |
| 0.483033333  | 0.461866667  | 0.718533333 | 1.645508334 |
| 0.0892       | 0.0681       | 0.718422222 | 1.645381608 |
| 0.378466667  | 0.305366667  | 0.718255556 | 1.645191537 |
| -0.0215      | -0.024433333 | 0.717222222 | 1.644013587 |
| 0.2056       | 0.198933333  | 0.716466667 | 1.643152824 |
| 0.069333333  | -0.025366667 | 0.715922222 | 1.642532848 |
| 0.701633333  | 0.577133333  | 0.715577778 | 1.642140739 |
| 0.622133333  | 0.679233333  | 0.715311111 | 1.641837235 |
| 0.476433333  | 0.456233333  | 0.715111111 | 1.641609644 |
| 0.1193       | 0.2405       | 0.7143      | 1.640686958 |
| 0.5394       | 0.544933333  | 0.713555556 | 1.639840566 |
| 0.642633333  | 0.755133333  | 0.712655556 | 1.6388179   |
| 0.2071       | 0.183166667  | 0.712044444 | 1.63812386  |
| 0.355033333  | 0.574666667  | 0.712022222 | 1.638098628 |
| 0.276666667  | 0.2889       | 0.711688889 | 1.63772019  |
| 0.298433333  | 0.467433333  | 0.710744444 | 1.636648426 |
| 0.403433333  | 0.409266667  | 0.710633333 | 1.636522382 |
| 0.260966667  | 0.384066667  | 0.7098      | 1.635577362 |

|              |              |             |             |
|--------------|--------------|-------------|-------------|
| 0.569433333  | 0.426866667  | 0.709588889 | 1.635338044 |
| 0.2306       | 0.1415       | 0.709355556 | 1.635073575 |
| 0.316433333  | 0.4213       | 0.708688889 | 1.634318185 |
| 0.525866667  | 0.326966667  | 0.708533333 | 1.634141978 |
| 0.743366667  | 0.663966667  | 0.707277778 | 1.632720427 |
| 0.1802       | 0.3171       | 0.707044444 | 1.632456382 |
| 0.196366667  | 0.240066667  | 0.706888889 | 1.632280375 |
| 0.5319       | 0.687733333  | 0.705744444 | 1.630986052 |
| 0.4893       | 0.625066667  | 0.705633333 | 1.630860444 |
| 0.295066667  | 0.546633333  | 0.705155556 | 1.630320441 |
| 0.404766667  | 0.2574       | 0.703288889 | 1.628212375 |
| 0.123433333  | 0.175066667  | 0.701511111 | 1.626207227 |
| 0.146533333  | 0.2589       | 0.7013      | 1.62596928  |
| 0.477333333  | 0.200566667  | 0.699477778 | 1.623916866 |
| 0.255433333  | 0.2519       | 0.6994      | 1.623829321 |
| 0.1497       | -0.1084      | 0.698544444 | 1.622866633 |
| 0.4307       | 0.661633333  | 0.698288889 | 1.622579188 |
| 0.1266       | 0.102033333  | 0.698022222 | 1.622279299 |
| 0.286066667  | 0.305733333  | 0.696677778 | 1.620768205 |
| 0.204333333  | 0.369933333  | 0.696       | 1.620006947 |
| 0.233066667  | 0.435933333  | 0.695744444 | 1.619720009 |
| -0.031633333 | 0.0457       | 0.6956      | 1.619557848 |
| -0.114133333 | -0.035033333 | 0.695511111 | 1.619458065 |
| 0.417866667  | 0.521566667  | 0.694744444 | 1.618597693 |
| -0.0418      | 0.166166667  | 0.694588889 | 1.618423181 |
| 0.033766667  | 0.168333333  | 0.692877778 | 1.616504785 |
| 0.358466667  | 0.243466667  | 0.690688889 | 1.614054048 |
| 0.316133333  | -0.120566667 | 0.690366667 | 1.613693593 |
| 0.4894       | 0.405433333  | 0.689722222 | 1.612972925 |
| 0.014333333  | 0.098166667  | 0.689133333 | 1.612314666 |
| 0.644366667  | 0.6112       | 0.688355556 | 1.611445678 |
| 0.059433333  | 0.217833333  | 0.687622222 | 1.610626775 |
| 0.068433333  | 0.0054       | 0.6874      | 1.610378705 |
| -0.0999      | 0.163833333  | 0.686833333 | 1.609746299 |
| 0.5953       | 0.525833333  | 0.6866      | 1.609485969 |
| 0.3707       | 0.236766667  | 0.6862      | 1.609039787 |
| 0.326833333  | 0.4729       | 0.686166667 | 1.60900261  |
| 0.182633333  | 0.342        | 0.684911111 | 1.607602929 |
| 0.867533333  | 0.6513       | 0.684633333 | 1.60729343  |
| 0.121966667  | 0.1136       | 0.683955556 | 1.606538501 |
| 0.2093       | 0.2342       | 0.682522222 | 1.60494318  |
| 0.3195       | 0.3816       | 0.682033333 | 1.604399402 |
| 0.2237       | 0.2285       | 0.681966667 | 1.604325264 |
| 0.274133333  | 0.154766667  | 0.680177778 | 1.602337193 |
| 0.518366667  | 0.569466667  | 0.679355556 | 1.601424247 |
| 0.159466667  | 0.217566667  | 0.678466667 | 1.600437864 |
| 0.1371       | 0.355366667  | 0.677811111 | 1.599710796 |

|              |              |             |             |
|--------------|--------------|-------------|-------------|
| 0.152166667  | 0.137233333  | 0.676833333 | 1.598626969 |
| 0.1497       | 0.0691       | 0.676344444 | 1.598085331 |
| 0.0485       | 0.018733333  | 0.676033333 | 1.597740748 |
| 0.3696       | 0.0283       | 0.675377778 | 1.597014905 |
| 0.226066667  | 0.2471       | 0.675255556 | 1.596879615 |
| 0.398466667  | 0.214633333  | 0.673911111 | 1.59539218  |
| 0.150633333  | 0.0455       | 0.673333333 | 1.594753377 |
| 0.6058       | 0.740466667  | 0.673233333 | 1.594642841 |
| 0.056233333  | 0.225066667  | 0.6728      | 1.59416394  |
| 0.1402       | 0.2008       | 0.672766667 | 1.594127107 |
| 0.584466667  | 0.261366667  | 0.672744444 | 1.594102553 |
| 0.055866667  | 0.0575       | 0.672622222 | 1.593967509 |
| 0.218066667  | 0.123266667  | 0.671988889 | 1.593267922 |
| 0.559366667  | 0.706766667  | 0.6711      | 1.592286563 |
| 0.183633333  | 0.211666667  | 0.670622222 | 1.591759332 |
| 0.344433333  | 0.309        | 0.670433333 | 1.59155094  |
| -0.0812      | -0.092266667 | 0.669688889 | 1.590729896 |
| -0.073566667 | -0.150866667 | 0.669533333 | 1.590558388 |
| 0.488633333  | 0.2471       | 0.668233333 | 1.589125796 |
| 0.3799       | 0.428166667  | 0.668066667 | 1.588942223 |
| 0.286133333  | 0.090633333  | 0.668055556 | 1.588929986 |
| 0.034333333  | -0.1068      | 0.667955556 | 1.588819853 |
| 0.375433333  | 0.344566667  | 0.666633333 | 1.587364376 |
| 0.124733333  | 0.0699       | 0.665566667 | 1.58619118  |
| -0.006033333 | -0.0548      | 0.664088889 | 1.584567249 |
| 0.328233333  | 0.358733333  | 0.663588889 | 1.584018175 |
| 0.4701       | 0.5771       | 0.663511111 | 1.58393278  |
| 0.155766667  | 0.177733333  | 0.663322222 | 1.583725413 |
| 0.318766667  | 0.181033333  | 0.662466667 | 1.582786501 |
| 0.502333333  | 0.644133333  | 0.661777778 | 1.582030899 |
| 0.361266667  | 0.7228       | 0.661555556 | 1.581787233 |
| 0.040066667  | -0.103366667 | 0.660688889 | 1.580837296 |
| 0.5688       | 0.432433333  | 0.660133333 | 1.580228661 |
| 0.251733333  | 0.197233333  | 0.660122222 | 1.580216491 |
| 0.440666667  | 0.409        | 0.658588889 | 1.578537888 |
| 0.500066667  | 0.5094       | 0.658588889 | 1.578537888 |
| 0.5904       | 0.5246       | 0.658122222 | 1.578027363 |
| 0.259366667  | 0.265833333  | 0.658066667 | 1.577966598 |
| 0.16         | 0.154166667  | 0.657544444 | 1.577395514 |
| 0.277633333  | 0.1983       | 0.657455556 | 1.577298328 |
| 0.876433333  | 0.835366667  | 0.657233333 | 1.577055392 |
| 0.411266667  | 0.472566667  | 0.6571      | 1.576909647 |
| 0.002133333  | 0.086266667  | 0.656477778 | 1.576229686 |
| -0.013466667 | 0.068866667  | 0.655111111 | 1.574737229 |
| 0.319033333  | 0.299666667  | 0.654377778 | 1.573936981 |
| 0.187633333  | 0.227866667  | 0.654144444 | 1.573682442 |
| 0.416066667  | 0.4724       | 0.653177778 | 1.572628361 |

|             |              |             |             |
|-------------|--------------|-------------|-------------|
| 0.373266667 | 0.382533333  | 0.653144444 | 1.572592026 |
| 0.27        | 0.2568       | 0.651266667 | 1.570546509 |
| 0.242966667 | 0.0371       | 0.649877778 | 1.569035265 |
| 0.5067      | 0.1193       | 0.649588889 | 1.568721109 |
| -0.1473     | -0.129233333 | 0.649222222 | 1.568322463 |
| 0.481733333 | 0.413466667  | 0.649044444 | 1.568129216 |
| -0.152      | -0.043033333 | 0.648555556 | 1.567597911 |
| 0.237933333 | 0.163033333  | 0.648055556 | 1.567054717 |
| 0.458433333 | 0.213533333  | 0.647522222 | 1.566475518 |
| 0.206966667 | 0.053766667  | 0.6474      | 1.566342815 |
| 0.477666667 | 0.435133333  | 0.647311111 | 1.566246311 |
| 0.160133333 | 0.4077       | 0.646711111 | 1.565595062 |
| 0.160666667 | 0.181166667  | 0.646033333 | 1.564859719 |
| 0.6216      | 0.471633333  | 0.645388889 | 1.56416086  |
| 0.034333333 | 0.212633333  | 0.644466667 | 1.563161312 |
| -0.0417     | -0.014466667 | 0.644       | 1.56265576  |
| 0.458366667 | 0.4069       | 0.643944444 | 1.562595586 |
| 0.264533333 | -0.054733333 | 0.643566667 | 1.562186466 |
| 0.282566667 | 0.2018       | 0.6431      | 1.561681229 |
| 0.559666667 | 0.5527       | 0.642566667 | 1.561104016 |
| 0.024033333 | 0.274366667  | 0.642466667 | 1.560995812 |
| 0.150233333 | 0.206233333  | 0.642355556 | 1.560875594 |
| 0.4094      | 0.6007       | 0.6421      | 1.560599129 |
| 0.497533333 | 0.4677       | 0.641644444 | 1.560106421 |
| 0.5004      | 0.3915       | 0.641177778 | 1.559601857 |
| 0.270133333 | 0.2054       | 0.6409      | 1.559301599 |
| 0.161       | 0.129566667  | 0.6408      | 1.55919352  |
| 0.204233333 | 0.149733333  | 0.640711111 | 1.559097456 |
| 0.049533333 | 0.016533333  | 0.639722222 | 1.558029146 |
| 0.468966667 | 0.622366667  | 0.639333333 | 1.557609225 |
| 0.367433333 | 0.2567       | 0.638755556 | 1.55698555  |
| -0.0086     | 0.138833333  | 0.638311111 | 1.556505971 |
| 0.4063      | 0.260066667  | 0.6377      | 1.55584679  |
| 0.482766667 | 0.495533333  | 0.636866667 | 1.554948357 |
| 0.4474      | 0.4473       | 0.6363      | 1.554337719 |
| 0.405633333 | 0.375833333  | 0.636044444 | 1.554062412 |
| -0.0304     | -0.092033333 | 0.635988889 | 1.554002569 |
| 0.1209      | 0.302533333  | 0.635988889 | 1.554002569 |
| 0.4564      | 0.408933333  | 0.635511111 | 1.553488015 |
| 0.4594      | -0.1219      | 0.635288889 | 1.553248745 |
| 0.209733333 | 0.314133333  | 0.632422222 | 1.55016547  |
| 0.4495      | 0.341533333  | 0.6318      | 1.549497041 |
| 0.1729      | 0.132866667  | 0.631144444 | 1.548793115 |
| 0.364033333 | 0.337533333  | 0.629955556 | 1.547517319 |
| 0.463266667 | 0.424366667  | 0.629333333 | 1.546850032 |
| 0.508466667 | 0.2421       | 0.628288889 | 1.545730589 |
| 0.218433333 | 0.367533333  | 0.628255556 | 1.545694876 |

|              |              |             |             |
|--------------|--------------|-------------|-------------|
| 0.4982       | 0.589766667  | 0.627055556 | 1.544409737 |
| 0.653533333  | 0.555033333  | 0.626733333 | 1.544064836 |
| 0.250566667  | 0.2155       | 0.626255556 | 1.543553572 |
| 0.2919       | 0.395033333  | 0.625277778 | 1.542507793 |
| 0.174633333  | 0.138333333  | 0.624966667 | 1.542175193 |
| 0.1543       | 0.106733333  | 0.624622222 | 1.541807042 |
| -0.112933333 | 0.077933333  | 0.623377778 | 1.540477678 |
| 0.156366667  | 0.168566667  | 0.623377778 | 1.540477678 |
| 0.2355       | 0.155133333  | 0.622444444 | 1.539481408 |
| 0.1654       | 0.104233333  | 0.6222      | 1.539220587 |
| 0.3887       | 0.500333333  | 0.621433333 | 1.538402842 |
| 0.163566667  | -0.1128      | 0.620633333 | 1.537550007 |
| -0.023       | 0.081733333  | 0.620244444 | 1.537135605 |
| 0.233466667  | -0.0059      | 0.619811111 | 1.536673975 |
| 0.030266667  | -0.0095      | 0.6197      | 1.53655563  |
| 0.526533333  | 0.497166667  | 0.619233333 | 1.536058683 |
| 0.404933333  | 0.4145       | 0.619177778 | 1.535999533 |
| 0.087733333  | -0.037733333 | 0.618233333 | 1.534994337 |
| 0.089966667  | 0.4124       | 0.617977778 | 1.534722456 |
| 0.2461       | 0.115666667  | 0.6154      | 1.531982694 |
| -0.032666667 | 0.026566667  | 0.614766667 | 1.531310312 |
| 0.227033333  | 0.183933333  | 0.614744444 | 1.531286725 |
| 0.362633333  | 0.295733333  | 0.614733333 | 1.531274931 |
| 0.177033333  | 0.289266667  | 0.614511111 | 1.531039083 |
| 0.355566667  | 0.472166667  | 0.613822222 | 1.530308184 |
| 0.570866667  | 0.592366667  | 0.613522222 | 1.529989999 |
| 0.533133333  | 0.6809       | 0.613366667 | 1.52982504  |
| 0.019633333  | -0.1902      | 0.612333333 | 1.528729692 |
| 0.039866667  | 0.0208       | 0.6122      | 1.528588413 |
| 0.108133333  | 0.0978       | 0.611911111 | 1.528282356 |
| 0.1149       | 0.021166667  | 0.611877778 | 1.528247045 |
| 0.410366667  | 0.3321       | 0.611566667 | 1.527917521 |
| 0.312766667  | 0.1495       | 0.611411111 | 1.527752785 |
| 0.304        | 0.3178       | 0.610866667 | 1.52717635  |
| 0.268666667  | 0.409766667  | 0.610788889 | 1.52709402  |
| 0.400833333  | 0.4526       | 0.610022222 | 1.526282719 |
| 0.4844       | 0.2907       | 0.609788889 | 1.526035886 |
| 0.5265       | 0.2475       | 0.609733333 | 1.525977122 |
| 0.454566667  | 0.5022       | 0.609022222 | 1.525225147 |
| -0.0574      | -0.018233333 | 0.608588889 | 1.524767093 |
| 0.1213       | 0.3118       | 0.608411111 | 1.524579213 |
| 0.125566667  | 0.224933333  | 0.608       | 1.524144483 |
| 0.4063       | 0.546766667  | 0.607922222 | 1.524062664 |
| 0.212        | 0.190666667  | 0.607866667 | 1.524003976 |
| 0.268733333  | 0.1353       | 0.607777778 | 1.52391008  |
| 0.4352       | 0.5168       | 0.607422222 | 1.523534555 |
| 0.225866667  | 0.346533333  | 0.6074      | 1.523511088 |

|              |              |             |             |
|--------------|--------------|-------------|-------------|
| 0.4383       | 0.365        | 0.606833333 | 1.522912796 |
| 0.050866667  | 0.2849       | 0.606688889 | 1.522760327 |
| 0.126366667  | 0.053366667  | 0.606066667 | 1.522103715 |
| 0.447666667  | 0.485366667  | 0.605866667 | 1.521892722 |
| 0.415166667  | 0.482266667  | 0.605144444 | 1.521131043 |
| 0.641133333  | 0.482533333  | 0.605133333 | 1.521119328 |
| 0.1357       | 0.093866667  | 0.604788889 | 1.520756203 |
| 0.6364       | 0.623133333  | 0.604466667 | 1.520416584 |
| 0.3745       | 0.465566667  | 0.603866667 | 1.519784392 |
| -0.013933333 | 0.149866667  | 0.603655556 | 1.519562017 |
| 0.170166667  | 0.0462       | 0.602833333 | 1.518696233 |
| 0.446733333  | 0.3703       | 0.601666667 | 1.517468603 |
| -0.2054      | -0.429133333 | 0.601244444 | 1.517024562 |
| 0.000966667  | 0.124566667  | 0.600766667 | 1.516522252 |
| 0.421        | 0.526766667  | 0.600011111 | 1.51572824  |
| 0.2637       | 0.123233333  | 0.599977778 | 1.51569322  |
| 0.2984       | 0.0771       | 0.599933333 | 1.515646527 |
| 0.033733333  | 0.260566667  | 0.5997      | 1.515401415 |
| 0.0251       | 0.076266667  | 0.599511111 | 1.51520302  |
| 0.181633333  | 0.1477       | 0.599455556 | 1.515144673 |
| 0.200533333  | 0.189433333  | 0.599344444 | 1.515027987 |
| 0.2918       | 0.205266667  | 0.5993      | 1.514981315 |
| 0.061533333  | 0.002133333  | 0.5987      | 1.514351383 |
| 0.301        | 0.414233333  | 0.597577778 | 1.513173879 |
| 0.4395       | 0.2659       | 0.597088889 | 1.512661194 |
| 0.011133333  | 0.008233333  | 0.596411111 | 1.511950713 |
| 0.168433333  | 0.2495       | 0.596133333 | 1.511659629 |
| 0.479366667  | 0.6899       | 0.595322222 | 1.510809983 |
| 0.1724       | 0.1218       | 0.594422222 | 1.509867785 |
| 0.401133333  | 0.5319       | 0.594288889 | 1.50972825  |
| 0.175566667  | 0.093333333  | 0.5937      | 1.509112125 |
| 0.4556       | 0.4507       | 0.593355556 | 1.508751866 |
| 0.0736       | 0.082966667  | 0.592488889 | 1.50784579  |
| 0.0135       | 0.0166       | 0.592       | 1.50733491  |
| 0.4138       | 0.531933333  | 0.591855556 | 1.507184001 |
| 0.371633333  | 0.175266667  | 0.591622222 | 1.506940257 |
| 0.5259       | 0.511733333  | 0.590955556 | 1.506244064 |
| 0.209433333  | 0.240266667  | 0.590644444 | 1.505919284 |
| 0.015933333  | 0.0967       | 0.589888889 | 1.505130823 |
| -0.1495      | -0.149       | 0.589855556 | 1.505096048 |
| 0.058366667  | 0.217166667  | 0.589322222 | 1.504539749 |
| 0.295233333  | 0.264633333  | 0.5888      | 1.503995239 |
| 0.0929       | 0.250533333  | 0.588755556 | 1.503948907 |
| 0.308566667  | 0.2042       | 0.588166667 | 1.50333514  |
| 0.4158       | 0.2108       | 0.587444444 | 1.502582749 |
| 0.295866667  | 0.357866667  | 0.5873      | 1.502432316 |
| -0.081633333 | 0.090266667  | 0.585977778 | 1.501055976 |



|              |              |             |             |
|--------------|--------------|-------------|-------------|
| 0.241633333  | 0.322866667  | 0.585744444 | 1.500813223 |
| 0.314        | 0.456266667  | 0.585033333 | 1.500073648 |
| 0.6085       | 0.2669       | 0.584955556 | 1.499992779 |
| 0.0609       | 0.093666667  | 0.584166667 | 1.499172783 |
| 0.0783       | 0.0803       | 0.584044444 | 1.499045781 |
| 0.2654       | 0.307        | 0.583544444 | 1.498526342 |
| 0.125533333  | -0.027166667 | 0.583511111 | 1.498491719 |
| 0.069        | 0.158        | 0.5829      | 1.497857107 |
| 0.3822       | 0.429166667  | 0.582855556 | 1.497810964 |
| 0.436966667  | 0.3605       | 0.582233333 | 1.49716511  |
| 0.269966667  | 0.252466667  | 0.581855556 | 1.49677312  |
| 0.217133333  | 0.139733333  | 0.581366667 | 1.496265992 |
| 0.065833333  | 0.3607       | 0.580644444 | 1.495517139 |
| 0.319666667  | 0.207833333  | 0.5805      | 1.495367414 |
| 0.4792       | 0.5196       | 0.580222222 | 1.495079522 |
| -0.049033333 | -0.031233333 | 0.579688889 | 1.494526925 |
| 0.1916       | 0.1146       | 0.579644444 | 1.494480885 |
| 0.5123       | 0.350433333  | 0.578688889 | 1.493491357 |
| 0.5513       | 0.508333333  | 0.578266667 | 1.493054333 |
| 0.3919       | 0.794133333  | 0.577888889 | 1.492663419 |
| 0.3554       | 0.449333333  | 0.577011111 | 1.491755516 |
| 0.4495       | 0.5696       | 0.576866667 | 1.491606167 |
| -0.112933333 | -0.021866667 | 0.5765      | 1.491227117 |
| 0.4004       | 0.3403       | 0.576166667 | 1.49088261  |
| 0.273833333  | 0.277333333  | 0.575755556 | 1.490457828 |
| 0.330666667  | 0.039966667  | 0.575633333 | 1.490331565 |
| 0.6513       | 0.5674       | 0.5756      | 1.490297131 |
| 0.3124       | 0.2727       | 0.575533333 | 1.490228267 |
| 0.185233333  | 0.068066667  | 0.575244444 | 1.489929889 |
| 0.2326       | 0.166866667  | 0.575011111 | 1.489688936 |
| 0.486266667  | 0.3893       | 0.574711111 | 1.489379196 |
| 0.2647       | 0.352        | 0.574566667 | 1.489230085 |
| 0.238966667  | 0.24         | 0.574177778 | 1.488828707 |
| 0.580933333  | 0.474433333  | 0.573       | 1.487613762 |
| 0.284433333  | 0.187133333  | 0.572911111 | 1.487522109 |
| 0.066233333  | 0.065233333  | 0.572377778 | 1.486972305 |
| 0.445066667  | 0.4683       | 0.5721      | 1.48668603  |
| 0.064933333  | 0.018833333  | 0.571655556 | 1.486228104 |
| 0.293333333  | 0.145766667  | 0.570844444 | 1.485392753 |
| 0.126166667  | 0.1485       | 0.569688889 | 1.484203474 |
| 0.298033333  | 0.251533333  | 0.568777778 | 1.483266445 |
| 0.114333333  | 0.274066667  | 0.568433333 | 1.482912356 |
| 0.2133       | 0.5397       | 0.567944444 | 1.482409924 |
| 0.2743       | 0.329933333  | 0.567844444 | 1.482307175 |
| 0.235566667  | 0.283633333  | 0.5677      | 1.482158772 |
| 0.2226       | 0.266233333  | 0.567411111 | 1.48186201  |
| 0.197033333  | 0.270833333  | 0.5668      | 1.481234441 |

|              |              |             |             |
|--------------|--------------|-------------|-------------|
| 0.425666667  | 0.4323       | 0.5667      | 1.481131773 |
| 0.2955       | 0.224966667  | 0.566288889 | 1.480709769 |
| 0.124633333  | 0.1382       | 0.566033333 | 1.480447503 |
| 0.169266667  | 0.1881       | 0.565566667 | 1.479968702 |
| 0.445933333  | 0.2872       | 0.565322222 | 1.479717964 |
| -0.051166667 | -0.009533333 | 0.565177778 | 1.47956982  |
| 0.3553       | 0.144433333  | 0.564255556 | 1.478624328 |
| 0.477566667  | 0.7455       | 0.564155556 | 1.478521841 |
| 0.4648       | 0.502133333  | 0.563877778 | 1.478237193 |
| 0.059266667  | -0.250433333 | 0.563855556 | 1.478214423 |
| 0.206333333  | 0.0602       | 0.563666667 | 1.478020896 |
| -0.029       | 0.023666667  | 0.563311111 | 1.47765668  |
| 0.244        | 0.178866667  | 0.563044444 | 1.477383576 |
| 0.036366667  | 0.050333333  | 0.562577778 | 1.476905766 |
| 0.363166667  | 0.229466667  | 0.562466667 | 1.476792024 |
| 0.534166667  | 0.476366667  | 0.562244444 | 1.476564568 |
| 0.025933333  | -0.035666667 | 0.561988889 | 1.476303036 |
| 0.0205       | 0.008833333  | 0.5617      | 1.476007447 |
| 0.232933333  | -0.010966667 | 0.561644444 | 1.475950609 |
| 0.308366667  | 0.3265       | 0.5616      | 1.475905141 |
| 0.469833333  | 0.579866667  | 0.561522222 | 1.475825575 |
| 0.1831       | 0.165466667  | 0.561188889 | 1.475484626 |
| 0.054766667  | 0.128366667  | 0.561077778 | 1.475370994 |
| 0.3017       | 0.180566667  | 0.560722222 | 1.475007431 |
| 0.216566667  | 0.197566667  | 0.560655556 | 1.474939272 |
| 0.323633333  | 0.388866667  | 0.560466667 | 1.474746174 |
| 0.4444       | 0.3586       | 0.560222222 | 1.47449632  |
| 0.633566667  | 0.437466667  | 0.559488889 | 1.473747013 |
| 0.388566667  | 0.2954       | 0.559433333 | 1.473690263 |
| 0.143566667  | 0.273166667  | 0.558922222 | 1.473168263 |
| 0.436266667  | 0.2807       | 0.558666667 | 1.472907333 |
| 0.4861       | 0.379266667  | 0.557866667 | 1.472090806 |
| 0.028933333  | 0.025466667  | 0.557777778 | 1.472000109 |
| 0.472133333  | 0.372066667  | 0.557555556 | 1.47177339  |
| 0.3051       | 0.360366667  | 0.557533333 | 1.47175072  |
| 0.023033333  | -0.011       | 0.557533333 | 1.47175072  |
| 0.225666667  | 0.1951       | 0.5574      | 1.471614708 |
| 0.266233333  | 0.159233333  | 0.557188889 | 1.47139938  |
| 0.156        | 0.111866667  | 0.556633333 | 1.47083288  |
| 0.1888       | 0.148933333  | 0.556444444 | 1.47064032  |
| 0.184        | 0.256533333  | 0.556       | 1.470187336 |
| 0.306733333  | 0.4602       | 0.555822222 | 1.470006182 |
| 0.531433333  | 0.3419       | 0.555244444 | 1.469417584 |
| 0.558633333  | 0.449633333  | 0.5551      | 1.469270472 |
| 0.547166667  | 0.3601       | 0.553311111 | 1.467449759 |
| 0.2193       | 0.198566667  | 0.552911111 | 1.467042952 |
| 0.1232       | 0.336166667  | 0.552488889 | 1.466613667 |

|              |              |             |             |
|--------------|--------------|-------------|-------------|
| -0.060966667 | 0.159433333  | 0.552344444 | 1.466466835 |
| 0.254166667  | 0.200733333  | 0.552177778 | 1.466297432 |
| -0.007033333 | 0.143533333  | 0.551611111 | 1.465721608 |
| 0.224833333  | 0.149533333  | 0.5515      | 1.465608728 |
| 0.1277       | 0.050033333  | 0.551266667 | 1.465371708 |
| 0.157233333  | 0.103766667  | 0.551233333 | 1.465337851 |
| 0.3185       | 0.3061       | 0.551166667 | 1.465270139 |
| 0.068866667  | 0.084333333  | 0.550377778 | 1.464469125 |
| -0.0187      | 0.2468       | 0.550366667 | 1.464457846 |
| -0.071766667 | 0.016333333  | 0.549955556 | 1.464040593 |
| -0.062133333 | 0.0722       | 0.549766667 | 1.463848922 |
| 0.399433333  | 0.344566667  | 0.548666667 | 1.462733219 |
| 0.279366667  | 0.3528       | 0.547988889 | 1.462046188 |
| 0.400233333  | 0.0556       | 0.546988889 | 1.461033126 |
| 0.400466667  | 0.523666667  | 0.546655556 | 1.460695595 |
| -0.002466667 | 0.166633333  | 0.546522222 | 1.460560604 |
| 0.336966667  | 0.483466667  | 0.546511111 | 1.460549355 |
| 0.104166667  | 0.1345       | 0.546177778 | 1.460211936 |
| -0.1284      | 0.024266667  | 0.545988889 | 1.460020766 |
| 0.126066667  | 0.233466667  | 0.545877778 | 1.459908325 |
| 0.0944       | 0.030033333  | 0.545377778 | 1.459402447 |
| 0.289933333  | 0.282366667  | 0.545122222 | 1.459143955 |
| 0.3353       | 0.315166667  | 0.544533333 | 1.458548473 |
| 0.245733333  | 0.190866667  | 0.5445      | 1.458514774 |
| 0.533666667  | 0.361533333  | 0.5444      | 1.458413681 |
| 0.1208       | 0.1409       | 0.544222222 | 1.458233977 |
| 0.0838       | -0.031933333 | 0.544111111 | 1.458121674 |
| 0.167533333  | 0.1351       | 0.544088889 | 1.458099214 |
| 0.3932       | 0.3941       | 0.543955556 | 1.457964463 |
| 0.562066667  | 0.4727       | 0.543866667 | 1.457874636 |
| 0.6719       | 0.3178       | 0.543766667 | 1.457773588 |
| -0.051466667 | -0.061766667 | 0.543555556 | 1.457560286 |
| 0.1616       | 0.093066667  | 0.543411111 | 1.45741436  |
| 0.401833333  | 0.6356       | 0.543288889 | 1.457290896 |
| 0.281633333  | 0.227266667  | 0.542977778 | 1.456976672 |
| 0.141166667  | 0.241233333  | 0.542922222 | 1.456920567 |
| 0.326666667  | 0.3408       | 0.5428      | 1.456797145 |
| 0.050766667  | 0.0588       | 0.542555556 | 1.456550332 |
| 0.3546       | 0.328533333  | 0.541833333 | 1.455821356 |
| 0.5911       | 0.5572       | 0.540788889 | 1.45476779  |
| 0.3823       | 0.526666667  | 0.540666667 | 1.454644551 |
| -0.1378      | 0.044866667  | 0.540555556 | 1.454532523 |
| 0.4246       | 0.341766667  | 0.539911111 | 1.453882936 |
| 0.1499       | 0.288233333  | 0.539577778 | 1.453547057 |
| 0.386066667  | 0.3504       | 0.539277778 | 1.453244832 |
| 0.349966667  | 0.255233333  | 0.539188889 | 1.453155296 |
| 0.394333333  | 0.340266667  | 0.538966667 | 1.452931479 |

|              |              |             |             |
|--------------|--------------|-------------|-------------|
| 0.178033333  | 0.219433333  | 0.538766667 | 1.452730074 |
| 0.422633333  | 0.218033333  | 0.538666667 | 1.452629382 |
| 0.350133333  | 0.274066667  | 0.538533333 | 1.452495137 |
| 0.1065       | 0.325666667  | 0.538211111 | 1.452170762 |
| -0.263733333 | -0.1028      | 0.538188889 | 1.452148394 |
| 0.3145       | 0.3701       | 0.537955556 | 1.451913551 |
| 0.346333333  | 0.487933333  | 0.537077778 | 1.451030433 |
| 0.290933333  | 0.2043       | 0.536855556 | 1.450806944 |
| 0.181866667  | 0.035366667  | 0.535888889 | 1.449835168 |
| 0.404233333  | 0.414066667  | 0.535466667 | 1.449410918 |
| 0.475833333  | 0.524366667  | 0.535322222 | 1.449265808 |
| 0.339466667  | 0.242766667  | 0.534777778 | 1.448718987 |
| 0.469233333  | 0.3925       | 0.534366667 | 1.448306218 |
| 0.033866667  | 0.1281       | 0.534322222 | 1.448261602 |
| 0.012333333  | 0.236233333  | 0.533444444 | 1.447380705 |
| 0.387733333  | 0.324366667  | 0.5333      | 1.447235799 |
| 0.3072       | 0.293566667  | 0.533266667 | 1.447202361 |
| 0.466666667  | 0.308433333  | 0.533188889 | 1.447124342 |
| 0.0423       | -0.041933333 | 0.533166667 | 1.447102052 |
| 0.379        | 0.2196       | 0.532711111 | 1.446645177 |
| 0.2214       | 0.228566667  | 0.532433333 | 1.446366665 |
| -0.003133333 | 0.015233333  | 0.532411111 | 1.446344387 |
| -0.0397      | -0.204766667 | 0.532311111 | 1.446244137 |
| 0.464333333  | 0.3641       | 0.5323      | 1.446232999 |
| 0.128333333  | 0.3087       | 0.532166667 | 1.446099345 |
| 0.351266667  | 0.278866667  | 0.532133333 | 1.446065933 |
| 0.3187       | 0.3305       | 0.531955556 | 1.445887751 |
| 0.5123       | 0.3794       | 0.530855556 | 1.444785737 |
| -0.042966667 | 0.0011       | 0.530388889 | 1.44431847  |
| 0.231633333  | 0.320066667  | 0.530344444 | 1.444273976 |
| 0.184266667  | 0.203066667  | 0.530322222 | 1.444251729 |
| 0.364333333  | 0.161333333  | 0.529622222 | 1.443551144 |
| 0.471466667  | 0.635933333  | 0.5289      | 1.442828674 |
| 0.075966667  | 0.114666667  | 0.528866667 | 1.442795338 |
| 0.210066667  | 0.120333333  | 0.528622222 | 1.442550897 |
| 0.334566667  | 0.325766667  | 0.528488889 | 1.442417584 |
| 0.386466667  | 0.381733333  | 0.527666667 | 1.441595754 |
| -0.052066667 | 0.017433333  | 0.527377778 | 1.441307114 |
| 0.218333333  | 0.2408       | 0.527322222 | 1.441251613 |
| 0.1656       | 0.178733333  | 0.526944444 | 1.440874262 |
| 0.378266667  | 0.379133333  | 0.526711111 | 1.440641242 |
| 0.2276       | 0.178266667  | 0.526688889 | 1.440619052 |
| 0.289066667  | 0.529666667  | 0.526511111 | 1.440441541 |
| 0.145666667  | 0.025766667  | 0.526044444 | 1.439975679 |
| 0.0677       | 0.1122       | 0.526011111 | 1.439942408 |
| 0.284666667  | 0.561066667  | 0.525966667 | 1.439898049 |
| 0.281366667  | 0.4          | 0.524777778 | 1.438711954 |

|              |              |             |             |
|--------------|--------------|-------------|-------------|
| 0.1127       | 0.0442       | 0.524633333 | 1.438567916 |
| 0.1728       | 0.232133333  | 0.524544444 | 1.438479284 |
| 0.206633333  | 0.0183       | 0.524044444 | 1.437980831 |
| 0.360166667  | 0.514733333  | 0.523855556 | 1.437792572 |
| 0.3053       | 0.586866667  | 0.523455556 | 1.437393987 |
| 0.028866667  | 0.116033333  | 0.523322222 | 1.437261149 |
| 0.215866667  | 0.297        | 0.523266667 | 1.437205804 |
| 0.363133333  | 0.3412       | 0.523077778 | 1.437017646 |
| 0.1792       | 0.356766667  | 0.523       | 1.436940177 |
| -0.100333333 | 0.2792       | 0.522711111 | 1.436652469 |
| 0.018966667  | 0.0011       | 0.522522222 | 1.436464383 |
| 0.104833333  | 0.183966667  | 0.522277778 | 1.436221015 |
| 0.174766667  | 0.195333333  | 0.521955556 | 1.435900275 |
| 0.292966667  | 0.059533333  | 0.521466667 | 1.435413771 |
| -0.070133333 | 0.237166667  | 0.521433333 | 1.435380606 |
| 0.255733333  | 0.311866667  | 0.521355556 | 1.435303225 |
| 0.0568       | 0.001333333  | 0.521244444 | 1.435192687 |
| 0.174133333  | 0.356566667  | 0.521177778 | 1.435126369 |
| 0.061766667  | 0.118833333  | 0.519844444 | 1.433800643 |
| 0.683066667  | 0.721666667  | 0.519833333 | 1.433789601 |
| 0.155066667  | 0.189433333  | 0.519377778 | 1.433336929 |
| 0.383966667  | 0.500333333  | 0.519022222 | 1.432983723 |
| 0.321633333  | 0.416133333  | 0.519011111 | 1.432972687 |
| 0.288933333  | 0.308133333  | 0.518966667 | 1.432928542 |
| 0.3426       | 0.427033333  | 0.518677778 | 1.432641638 |
| 0.150166667  | 0.254833333  | 0.518422222 | 1.432387886 |
| -0.008433333 | 0.126533333  | 0.517877778 | 1.431847433 |
| 0.2882       | 0.191133333  | 0.517588889 | 1.431560745 |
| 0.540633333  | 0.3462       | 0.517555556 | 1.431527669 |
| 0.222466667  | 0.211733333  | 0.517522222 | 1.431494594 |
| 0.2748       | 0.454266667  | 0.517488889 | 1.43146152  |
| 0.670033333  | 0.410733333  | 0.516977778 | 1.430954478 |
| -0.012466667 | 0.070666667  | 0.516811111 | 1.430789178 |
| -0.122766667 | 0.041666667  | 0.5168      | 1.430778158 |
| 0.309766667  | 0.683466667  | 0.516777778 | 1.43075612  |
| 0.267266667  | 0.175733333  | 0.515922222 | 1.429907896 |
| 0.157633333  | 0.2014       | 0.515811111 | 1.429797774 |
| 0.497333333  | 0.3622       | 0.515655556 | 1.429643617 |
| 0.395866667  | 0.308        | 0.515266667 | 1.429258298 |
| 0.123666667  | 0.311366667  | 0.5152      | 1.429192254 |
| 0.207533333  | 0.2573       | 0.514911111 | 1.428906098 |
| 0.075733333  | 0.070133333  | 0.514644444 | 1.428642004 |
| -0.138       | -0.126733333 | 0.514255556 | 1.428256955 |
| 0.2491       | 0.245733333  | 0.514022222 | 1.428025976 |
| 0.2712       | 0.2069       | 0.513388889 | 1.42739922  |
| 0.305433333  | 0.338566667  | 0.512944444 | 1.426959555 |
| 0.323633333  | 0.244866667  | 0.5121      | 1.426124565 |

|              |              |             |             |
|--------------|--------------|-------------|-------------|
| 0.1496       | 0.084033333  | 0.511766667 | 1.425795099 |
| 0.146333333  | 0.109666667  | 0.5102      | 1.424247625 |
| 0.103166667  | 0.157633333  | 0.509511111 | 1.423567707 |
| 0.117066667  | -0.036566667 | 0.509355556 | 1.423414222 |
| 0.236133333  | 0.181533333  | 0.507866667 | 1.421945989 |
| 0.0261       | 0.1215       | 0.507211111 | 1.421300008 |
| 0.381033333  | 0.133333333  | 0.507022222 | 1.421113933 |
| 0.228133333  | 0.470466667  | 0.506833333 | 1.420927882 |
| 0.163566667  | 0.108366667  | 0.506777778 | 1.420873165 |
| 0.092866667  | 0.063833333  | 0.506466667 | 1.420566793 |
| 0.251933333  | 0.283333333  | 0.506333333 | 1.420435511 |
| 0.2321       | 0.2018       | 0.506288889 | 1.420391753 |
| 0.140233333  | -0.034433333 | 0.506077778 | 1.420183921 |
| 0.3385       | 0.228333333  | 0.505844444 | 1.419954247 |
| 0.875033333  | 0.600666667  | 0.505266667 | 1.41938569  |
| 0.020333333  | 0.045266667  | 0.505244444 | 1.419363827 |
| 0.1373       | 0.065866667  | 0.5049      | 1.419024993 |
| 0.052833333  | 0.2664       | 0.504844444 | 1.41897035  |
| 0.1541       | 0.0941       | 0.504822222 | 1.418948494 |
| 0.280133333  | 0.229533333  | 0.504733333 | 1.418861071 |
| 0.383766667  | 0.415933333  | 0.504444444 | 1.418576983 |
| 0.3881       | 0.462633333  | 0.5036      | 1.417746898 |
| 0.3623       | 0.278066667  | 0.503322222 | 1.41747395  |
| 0.1427       | 0.098666667  | 0.502733333 | 1.416895474 |
| 0.241        | 0.229133333  | 0.502622222 | 1.416786354 |
| 0.0791       | 0.279766667  | 0.502611111 | 1.416775443 |
| -0.0643      | 0.100533333  | 0.502566667 | 1.416731798 |
| 0.2697       | 0.162966667  | 0.502466667 | 1.416633601 |
| 0.1038       | 0.3482       | 0.502411111 | 1.41657905  |
| 0.081        | 0.3367       | 0.502155556 | 1.416328143 |
| 0.024833333  | 0.0709       | 0.501855556 | 1.416033656 |
| 0.259266667  | 0.293866667  | 0.500922222 | 1.415117867 |
| 0.208066667  | 0.157866667  | 0.500855556 | 1.415052476 |
| 0.015133333  | 0.015566667  | 0.500444444 | 1.4146493   |
| -0.058333333 | -0.0718      | 0.500277778 | 1.414485883 |
| 0.2814       | 0.4454       | 0.500077778 | 1.414289807 |
| 0.270233333  | 0.389966667  | 0.499822222 | 1.414039305 |
| 0.278366667  | 0.190666667  | 0.499755556 | 1.413973964 |
| 0.470933333  | -0.080333333 | 0.499655556 | 1.413875958 |
| 0.242733333  | 0.056133333  | 0.499566667 | 1.413788848 |
| 0.185666667  | 0.267966667  | 0.499544444 | 1.413767071 |
| 0.280766667  | 0.4768       | 0.499377778 | 1.413603755 |
| 0.1398       | 0.018966667  | 0.498788889 | 1.413026859 |
| 0.4218       | 0.4768       | 0.498555556 | 1.412798343 |
| 0.553566667  | 0.168933333  | 0.498233333 | 1.412482833 |
| 0.5123       | 0.514133333  | 0.497922222 | 1.41217827  |
| -0.023266667 | -0.0389      | 0.497722222 | 1.411982514 |

|              |              |             |             |
|--------------|--------------|-------------|-------------|
| 0.4623       | 0.461        | 0.496233333 | 1.410526073 |
| 0.172533333  | 0.113433333  | 0.496122222 | 1.410417443 |
| 0.3649       | 0.354733333  | 0.496077778 | 1.410373994 |
| 0.240233333  | 0.3456       | 0.495655556 | 1.409961291 |
| 0.3459       | 0.3135       | 0.495566667 | 1.409874422 |
| 0.1274       | 0.2968       | 0.495522222 | 1.409830989 |
| -0.102       | 0.259666667  | 0.495355556 | 1.409668128 |
| 0.106133333  | 0.1612       | 0.495277778 | 1.409592133 |
| -0.1746      | -0.373033333 | 0.494944444 | 1.409266486 |
| 0.049066667  | 0.086733333  | 0.494933333 | 1.409255632 |
| 0.333966667  | 0.378233333  | 0.494555556 | 1.408886659 |
| 0.314333333  | 0.201766667  | 0.494       | 1.408344227 |
| 0.4637       | 0.385266667  | 0.493777778 | 1.408127313 |
| 0.364466667  | 0.4738       | 0.493322222 | 1.407682743 |
| 0.2726       | 0.284033333  | 0.493077778 | 1.407444251 |
| 0.066533333  | 0.145666667  | 0.492833333 | 1.407205799 |
| 0.214466667  | 0.099433333  | 0.492388889 | 1.406772354 |
| 0.3694       | 0.394033333  | 0.491666667 | 1.406068292 |
| 0.3455       | 0.279833333  | 0.491633333 | 1.406035805 |
| 0.145633333  | 0.148833333  | 0.4913      | 1.405710979 |
| 0.0881       | 0.037866667  | 0.491166667 | 1.40558107  |
| 0.298666667  | 0.282733333  | 0.4911      | 1.40551612  |
| 0.1975       | 0.2096       | 0.491044444 | 1.405461997 |
| 0.0725       | 0.041666667  | 0.490433333 | 1.404866783 |
| 0.1588       | 0.163533333  | 0.4902      | 1.404639587 |
| 0.279433333  | 0.344766667  | 0.4902      | 1.404639587 |
| 0.011866667  | 0.1734       | 0.489944444 | 1.404390794 |
| -0.017233333 | 0.056066667  | 0.4885      | 1.402985404 |
| 0.195533333  | 0.150133333  | 0.488388889 | 1.402877355 |
| 0.344166667  | 0.205533333  | 0.488222222 | 1.402715298 |
| 0.387766667  | 0.397333333  | 0.4879      | 1.40240204  |
| 0.184533333  | 0.320433333  | 0.4875      | 1.402013266 |
| -0.0025      | 0.036133333  | 0.487466667 | 1.401980873 |
| 0.2917       | 0.177233333  | 0.487255556 | 1.401775734 |
| 0.332933333  | 0.274        | 0.486733333 | 1.401268416 |
| -0.0281      | 0.233966667  | 0.486444444 | 1.40098785  |
| 0.056666667  | 0.093333333  | 0.4863      | 1.400847589 |
| 0.2233       | 0.0108       | 0.484977778 | 1.399564308 |
| 0.2544       | 0.2961       | 0.484777778 | 1.3993703   |
| -0.010766667 | 0.0426       | 0.4843      | 1.398906947 |
| 0.3925       | 0.1871       | 0.484       | 1.398616083 |
| 0.294833333  | 0.287733333  | 0.483555556 | 1.398185284 |
| 0.2858       | 0.259533333  | 0.4827      | 1.39735637  |
| 0.1643       | 0.218266667  | 0.4827      | 1.39735637  |
| 0.274866667  | 0.148833333  | 0.482088889 | 1.396764589 |
| 0.210233333  | 0.076833333  | 0.481266667 | 1.39596877  |
| 0.0911       | 0.114733333  | 0.4812      | 1.395904264 |

|              |              |             |             |
|--------------|--------------|-------------|-------------|
| 0.4395       | 0.365        | 0.480811111 | 1.395528039 |
| 0.259766667  | 0.3777       | 0.480711111 | 1.395431311 |
| 0.0243       | 0.141566667  | 0.479866667 | 1.394614771 |
| 0.211566667  | 0.402633333  | 0.4798      | 1.394550327 |
| 0.286433333  | 0.203366667  | 0.479322222 | 1.39408857  |
| 0.182033333  | 0.086333333  | 0.4793      | 1.394067097 |
| 0.5894       | 0.582833333  | 0.479211111 | 1.393981207 |
| 0.1776       | 0.1426       | 0.478955556 | 1.393734302 |
| 0.444433333  | 0.198933333  | 0.478755556 | 1.393541103 |
| 0.001966667  | 0.097733333  | 0.478177778 | 1.392983122 |
| -0.1066      | -0.0735      | 0.478011111 | 1.392822208 |
| 0.1431       | 0.072133333  | 0.477655556 | 1.392478986 |
| 0.484266667  | 0.674033333  | 0.477533333 | 1.392361023 |
| 0.083033333  | 0.037766667  | 0.477033333 | 1.391878551 |
| 0.003866667  | 0.045833333  | 0.476988889 | 1.391835672 |
| 0.269266667  | 0.2077       | 0.476855556 | 1.391707045 |
| 0.422466667  | 0.307933333  | 0.476788889 | 1.391642736 |
| 0.213266667  | 0.170233333  | 0.476644444 | 1.39150341  |
| 0.1304       | 0.2821       | 0.476322222 | 1.391192656 |
| 0.033066667  | -0.063333333 | 0.476088889 | 1.390967671 |
| 0.2206       | 0.2719       | 0.475711111 | 1.390603486 |
| 0.6          | 0.571533333  | 0.475711111 | 1.390603486 |
| -0.194033333 | 0.184333333  | 0.474977778 | 1.389896811 |
| 0.179433333  | 0.297833333  | 0.474844444 | 1.389768363 |
| 0.298666667  | 0.094833333  | 0.474533333 | 1.389468698 |
| 0.089766667  | 0.1252       | 0.473422222 | 1.388398991 |
| 0.236766667  | 0.282866667  | 0.473422222 | 1.388398991 |
| 0.115466667  | 0.278366667  | 0.4733      | 1.388281374 |
| 0.2713       | 0.015533333  | 0.473222222 | 1.388206532 |
| 0.0206       | 0.115366667  | 0.473188889 | 1.388174458 |
| 0.084133333  | 0.264733333  | 0.473055556 | 1.388046169 |
| 0.410466667  | 0.302433333  | 0.472833333 | 1.387832381 |
| 0.184466667  | 0.106533333  | 0.472744444 | 1.387746875 |
| 0.3665       | 0.4628       | 0.472511111 | 1.387522447 |
| 0.430433333  | 0.390633333  | 0.472433333 | 1.387447646 |
| 0.258533333  | 0.1092       | 0.472022222 | 1.387052334 |
| 0.426433333  | 0.619966667  | 0.4715      | 1.386550344 |
| 0.130533333  | 0.309866667  | 0.471433333 | 1.386486273 |
| 0.3145       | 0.123533333  | 0.471377778 | 1.386432883 |
| 0.233333333  | 0.0539       | 0.471277778 | 1.386336786 |
| 0.321133333  | 0.262333333  | 0.471133333 | 1.386197992 |
| 0.455433333  | 0.3892       | 0.4711      | 1.386165964 |
| 0.007333333  | -0.046933333 | 0.4705      | 1.385589594 |
| 0.325533333  | 0.244533333  | 0.470411111 | 1.385504226 |
| 0.515033333  | 0.4242       | 0.4702      | 1.385301498 |
| 0.025633333  | 0.146166667  | 0.47        | 1.385109468 |
| 0.180033333  | 0.265466667  | 0.469888889 | 1.385002796 |



|              |              |             |             |
|--------------|--------------|-------------|-------------|
| -0.067466667 | 0.106366667  | 0.469855556 | 1.384970796 |
| 0.0248       | 0.153566667  | 0.4688      | 1.383957845 |
| 0.049133333  | -0.156466667 | 0.468511111 | 1.383680746 |
| 0.384066667  | 0.4327       | 0.467833333 | 1.383030846 |
| 0.3263       | 0.371266667  | 0.467788889 | 1.38298824  |
| 0.140666667  | 0.2775       | 0.466955556 | 1.382189625 |
| 0.064833333  | 0.0882       | 0.4662      | 1.381465947 |
| 0.2361       | 0.348033333  | 0.466077778 | 1.381348917 |
| 0.389633333  | 0.3769       | 0.465922222 | 1.381199984 |
| 0.1446       | -0.010966667 | 0.465844444 | 1.381125523 |
| 0.293766667  | 0.0845       | 0.465788889 | 1.38107234  |
| 0.038566667  | 0.1148       | 0.465755556 | 1.38104043  |
| 0.478133333  | 0.241366667  | 0.465322222 | 1.380625678 |
| -0.029533333 | -0.184033333 | 0.465255556 | 1.380561881 |
| 0.398533333  | 0.330366667  | 0.465255556 | 1.380561881 |
| 0.345766667  | 0.207066667  | 0.464644444 | 1.379977213 |
| 0.206233333  | 0.182966667  | 0.464566667 | 1.379902818 |
| 0.337833333  | 0.3865       | 0.464033333 | 1.379392792 |
| 0.068233333  | 0.056333333  | 0.463477778 | 1.378861715 |
| -0.206533333 | -0.0541      | 0.463233333 | 1.378628106 |
| 0.210733333  | 0.115533333  | 0.463155556 | 1.378553785 |
| 0.0886       | 0.094966667  | 0.462711111 | 1.378129165 |
| 0.224366667  | 0.1838       | 0.462544444 | 1.377969967 |
| 0.2989       | 0.362366667  | 0.4625      | 1.377927517 |
| 0.455666667  | 0.021433333  | 0.462288889 | 1.377725898 |
| 0.457066667  | 0.556466667  | 0.4621      | 1.377545527 |
| -0.116766667 | 0.0413       | 0.462066667 | 1.3775137   |
| 0.283666667  | 0.238166667  | 0.461588889 | 1.377057583 |
| -0.0117      | 0.1334       | 0.461566667 | 1.377036372 |
| 0.149366667  | 0.265866667  | 0.461433333 | 1.376909113 |
| 0.2872       | 0.178733333  | 0.461344444 | 1.37682428  |
| 0.0534       | 0.152366667  | 0.461266667 | 1.376750056 |
| 0.076166667  | 0.2277       | 0.461055556 | 1.376548609 |
| 0.3517       | 0.607533333  | 0.461044444 | 1.376538007 |
| 0.229366667  | 0.088233333  | 0.460966667 | 1.376463798 |
| 0.090766667  | 0.276833333  | 0.460522222 | 1.376039823 |
| -0.014766667 | -0.1716      | 0.460477778 | 1.375997432 |
| 0.071433333  | 0.0064       | 0.460455556 | 1.375976238 |
| 0.2596       | 0.278733333  | 0.46        | 1.375541818 |
| 0.365633333  | 0.289333333  | 0.459844444 | 1.375393511 |
| 0.0978       | 0.176833333  | 0.459655556 | 1.375213446 |
| -0.142233333 | -0.134166667 | 0.4595      | 1.375065174 |
| -0.095933333 | -0.095266667 | 0.459344444 | 1.374916919 |
| 0.216666667  | 0.207866667  | 0.459288889 | 1.374863974 |
| 0.0168       | 0.227133333  | 0.458822222 | 1.374419321 |
| 0.208733333  | -0.014366667 | 0.458422222 | 1.374038304 |
| 0.357033333  | 0.5614       | 0.458188889 | 1.373816092 |

|              |              |             |             |
|--------------|--------------|-------------|-------------|
| 0.385433333  | 0.480166667  | 0.457611111 | 1.37326601  |
| 0.214866667  | 0.153333333  | 0.456633333 | 1.372335602 |
| 0.177266667  | 0.1396       | 0.456611111 | 1.372314464 |
| 0.4379       | 0.3692       | 0.456433333 | 1.372145369 |
| -0.1237      | 0.066433333  | 0.456266667 | 1.371986862 |
| 0.120666667  | 0.0618       | 0.456044444 | 1.371775548 |
| 0.1672       | 0.2574       | 0.456044444 | 1.371775548 |
| 0.238866667  | 0.089966667  | 0.455955556 | 1.371691031 |
| 0.283733333  | 0.3167       | 0.4559      | 1.371638211 |
| 0.4385       | 0.452033333  | 0.455311111 | 1.37107844  |
| 0.264266667  | 0.1441       | 0.455155556 | 1.370930615 |
| 0.0043       | -0.0774      | 0.455122222 | 1.37089894  |
| 0.1122       | 0.1371       | 0.4547      | 1.370497788 |
| 0.0577       | 0.042533333  | 0.454355556 | 1.37017062  |
| 0.426733333  | 0.379766667  | 0.453255556 | 1.369126315 |
| 0.226066667  | 0.2598       | 0.452988889 | 1.36887327  |
| 0.301233333  | 0.245566667  | 0.452977778 | 1.368862728 |
| 0.227466667  | 0.126166667  | 0.452555556 | 1.368462172 |
| -0.159633333 | 0.0107       | 0.452533333 | 1.368441094 |
| 0.379233333  | 0.488233333  | 0.452522222 | 1.368430554 |
| 0.151533333  | -0.052433333 | 0.451933333 | 1.367872093 |
| 0.3328       | -0.1387      | 0.451711111 | 1.367661413 |
| 0.204366667  | 0.222233333  | 0.451488889 | 1.367450764 |
| 0.2489       | 0.2037       | 0.451011111 | 1.36699798  |
| 0.032133333  | 0.043        | 0.450433333 | 1.366450627 |
| 0.1685       | 0.218666667  | 0.449511111 | 1.365577422 |
| 0.0263       | 0.0476       | 0.449188889 | 1.365272458 |
| 0.295633333  | 0.5773       | 0.449177778 | 1.365261944 |
| 0.1334       | 0.1944       | 0.449044444 | 1.365135772 |
| 0.128466667  | 0.202233333  | 0.448522222 | 1.364641714 |
| -0.0185      | 0.0591       | 0.448311111 | 1.364442039 |
| 0.0801       | -0.0691      | 0.448011111 | 1.364158341 |
| 0.1494       | 0.134366667  | 0.447977778 | 1.364126823 |
| 0.0312       | 0.133233333  | 0.447344444 | 1.363528112 |
| -0.1284      | -0.1837      | 0.446911111 | 1.363118619 |
| 0.128966667  | 0.142633333  | 0.446788889 | 1.363003143 |
| 0.089066667  | 0.035433333  | 0.446711111 | 1.362929663 |
| 0.0793       | 0.255966667  | 0.446622222 | 1.362845692 |
| 0.229366667  | 0.302333333  | 0.446522222 | 1.36275123  |
| 0.002233333  | 0.252066667  | 0.446133333 | 1.36238394  |
| 0.336333333  | 0.330233333  | 0.446055556 | 1.362310494 |
| 0.370833333  | 0.4076       | 0.445633333 | 1.361911855 |
| -0.018733333 | 0.160133333  | 0.445244444 | 1.361544792 |
| 0.373966667  | 0.330433333  | 0.444833333 | 1.36115686  |
| 0.070333333  | -0.036833333 | 0.4448      | 1.361125411 |
| 0.0987       | -0.049533333 | 0.444622222 | 1.360957695 |
| -0.054466667 | 0.061033333  | 0.444255556 | 1.360611847 |

|              |              |             |             |
|--------------|--------------|-------------|-------------|
| 0.015066667  | 0.0124       | 0.444255556 | 1.360611847 |
| 0.034166667  | 0.104333333  | 0.444122222 | 1.360486105 |
| 0.217433333  | 0.097366667  | 0.444022222 | 1.360391807 |
| 0.4342       | 0.3313       | 0.443855556 | 1.360234657 |
| 0.214233333  | 0.164066667  | 0.443611111 | 1.360004204 |
| 0.353666667  | 0.439333333  | 0.443444444 | 1.359847099 |
| 0.336333333  | 0.3464       | 0.443333333 | 1.359742373 |
| 0.2219       | 0.2798       | 0.443111111 | 1.359532944 |
| 0.276166667  | 0.267733333  | 0.442822222 | 1.359260735 |
| 0.085433333  | 0.027033333  | 0.442       | 1.358486285 |
| 0.205933333  | 0.153433333  | 0.441777778 | 1.358277049 |
| 0.4417       | 0.1031       | 0.441611111 | 1.358120144 |
| 0.2525       | 0.108566667  | 0.441422222 | 1.35794234  |
| -0.091533333 | -0.011       | 0.441055556 | 1.357597257 |
| 0.378433333  | 0.2706       | 0.441       | 1.35754498  |
| 0.3508       | 0.154966667  | 0.440988889 | 1.357534525 |
| -0.016133333 | -0.135433333 | 0.4407      | 1.357262716 |
| 0.072866667  | 0.1008       | 0.440488889 | 1.357064121 |
| 0.051666667  | -0.005066667 | 0.440255556 | 1.356844654 |
| -0.062366667 | -0.075466667 | 0.440188889 | 1.356781956 |
| 0.401066667  | 0.3476       | 0.440077778 | 1.356677466 |
| 0.324133333  | 0.4218       | 0.439622222 | 1.35624914  |
| 0.2502       | 0.3701       | 0.439488889 | 1.356123801 |
| 0.234633333  | 0.477333333  | 0.439011111 | 1.355674768 |
| 0.333966667  | 0.184966667  | 0.438711111 | 1.355392892 |
| -0.495433333 | -0.205833333 | 0.4382      | 1.354912795 |
| 0.1044       | 0.035333333  | 0.437355556 | 1.354119964 |
| 0.019        | 0.0545       | 0.4369      | 1.353692445 |
| 0.166633333  | 0.2627       | 0.436855556 | 1.353650743 |
| 0.2725       | 0.266566667  | 0.436788889 | 1.353588193 |
| 0.4674       | 0.286933333  | 0.436711111 | 1.353515221 |
| -0.062933333 | -0.029266667 | 0.435411111 | 1.352296129 |
| 0.403533333  | 0.285533333  | 0.435222222 | 1.352119088 |
| 0.2842       | 0.1653       | 0.434711111 | 1.35164015  |
| 0.168733333  | 0.471166667  | 0.434633333 | 1.351567283 |
| 0.243333333  | 0.3157       | 0.434422222 | 1.351369521 |
| -0.002333333 | -0.076666667 | 0.434244444 | 1.351203008 |
| 0.332        | 0.510366667  | 0.433711111 | 1.350703589 |
| 0.185266667  | 0.003166667  | 0.433655556 | 1.350651577 |
| 0.237166667  | 0.351333333  | 0.433555556 | 1.35055796  |
| 0.039466667  | 0.019966667  | 0.433511111 | 1.350516355 |
| 0.002466667  | -0.035266667 | 0.433477778 | 1.350485152 |
| 0.082466667  | 0.155466667  | 0.433366667 | 1.350381146 |
| 0.150066667  | 0.130033333  | 0.433233333 | 1.35025635  |
| 0.237433333  | 0.197666667  | 0.433044444 | 1.350079576 |
| 0.3145       | 0.3235       | 0.432555556 | 1.349622149 |
| -0.011766667 | 0.014866667  | 0.4325      | 1.349570179 |

|              |              |             |             |
|--------------|--------------|-------------|-------------|
| 0.474333333  | 0.3294       | 0.432222222 | 1.349310356 |
| 0.3025       | 0.333433333  | 0.431988889 | 1.349092144 |
| 0.0424       | -0.0961      | 0.431411111 | 1.348551961 |
| -0.018133333 | 0.0881       | 0.431311111 | 1.34845849  |
| 0.1807       | 0.4542       | 0.431166667 | 1.348323487 |
| 0.221366667  | 0.107733333  | 0.430933333 | 1.348105435 |
| 0.185033333  | 0.137533333  | 0.430866667 | 1.34804314  |
| 0.415466667  | 0.5923       | 0.430755556 | 1.347939323 |
| 0.296466667  | 0.0833       | 0.430577778 | 1.347773232 |
| 0.221366667  | 0.2478       | 0.430444444 | 1.347648677 |
| 0.335666667  | 0.232133333  | 0.430322222 | 1.347534512 |
| 0.046166667  | 0.1189       | 0.43        | 1.347233577 |
| 0.058433333  | 0.326633333  | 0.429977778 | 1.347212825 |
| 0.168633333  | 0.214666667  | 0.429955556 | 1.347192074 |
| 0.081        | 0.0542       | 0.428977778 | 1.346279332 |
| 0.1925       | 0.215833333  | 0.428766667 | 1.346082344 |
| -0.0425      | 0.058333333  | 0.428366667 | 1.345709182 |
| 0.325333333  | 0.187        | 0.428144444 | 1.345501915 |
| 0.240033333  | 0.159333333  | 0.428122222 | 1.34548119  |
| 0.335        | 0.290633333  | 0.427711111 | 1.345097836 |
| 0.1956       | 0.0991       | 0.427688889 | 1.345077117 |
| 0.0932       | 0.1919       | 0.427666667 | 1.345056399 |
| 0.323133333  | -0.2127      | 0.4276      | 1.344994245 |
| 0.148566667  | 0.1776       | 0.427255556 | 1.344673165 |
| -0.030066667 | -0.09        | 0.426555556 | 1.344020884 |
| 0.241233333  | 0.417033333  | 0.426077778 | 1.343575858 |
| 0.098066667  | -0.071433333 | 0.425955556 | 1.343462038 |
| -0.019466667 | 0.242333333  | 0.425377778 | 1.342924109 |
| 0.3498       | 0.366366667  | 0.425344444 | 1.342893081 |
| -0.076666667 | -0.115933333 | 0.425188889 | 1.342748294 |
| 0.132266667  | 0.081        | 0.425055556 | 1.342624204 |
| 0.042266667  | 0.056366667  | 0.424988889 | 1.342562163 |
| 0.1663       | 0.391966667  | 0.424966667 | 1.342541483 |
| 0.391366667  | 0.321866667  | 0.424955556 | 1.342531143 |
| 0.225366667  | 0.193966667  | 0.424955556 | 1.342531143 |
| 0.180733333  | 0.041433333  | 0.424855556 | 1.342438089 |
| 0.026266667  | 0.094566667  | 0.424855556 | 1.342438089 |
| 0.2248       | 0.175066667  | 0.424522222 | 1.342127956 |
| 0.1053       | 0.2572       | 0.424288889 | 1.341910906 |
| 0.543066667  | 0.4305       | 0.424133333 | 1.341766225 |
| -0.025966667 | 0.060433333  | 0.423866667 | 1.341518237 |
| 0.2817       | 0.263966667  | 0.423044444 | 1.340753895 |
| 0.079966667  | 0.1175       | 0.422988889 | 1.340702266 |
| 0.227666667  | 0.3013       | 0.422955556 | 1.340671289 |
| 0.2745       | 0.045966667  | 0.422722222 | 1.340454474 |
| 0.3644       | 0.367333333  | 0.422144444 | 1.33991775  |
| 0.0331       | 0.022066667  | 0.421766667 | 1.339566931 |

|              |              |             |             |
|--------------|--------------|-------------|-------------|
| 0.049666667  | -0.045966667 | 0.421744444 | 1.339546297 |
| 0.1378       | 0.288966667  | 0.421544444 | 1.33936061  |
| 0.228933333  | 0.161733333  | 0.421466667 | 1.339288405 |
| 0.438533333  | -0.091333333 | 0.4214      | 1.339226518 |
| -0.017433333 | -0.0725      | 0.421233333 | 1.339071813 |
| 0.133733333  | 0.1738       | 0.421233333 | 1.339071813 |
| 0.000233333  | 0.0323       | 0.421066667 | 1.338917127 |
| 0.0802       | 0.164766667  | 0.420677778 | 1.33855626  |
| 0.2751       | 0.390466667  | 0.419822222 | 1.337762697 |
| 0.3074       | 0.342166667  | 0.419733333 | 1.337680276 |
| 0.158933333  | 0.212766667  | 0.419488889 | 1.337453644 |
| 0.142633333  | 0.082766667  | 0.418955556 | 1.336959308 |
| 0.051066667  | 0.024566667  | 0.418755556 | 1.336773979 |
| 0.3082       | 0.229466667  | 0.418755556 | 1.336773979 |
| 0.232933333  | 0.375233333  | 0.418744444 | 1.336763683 |
| 0.161466667  | 0.145766667  | 0.4186      | 1.336629852 |
| 0.3518       | 0.262566667  | 0.4181      | 1.336166691 |
| 0.133233333  | 0.384633333  | 0.418       | 1.336074078 |
| 0.227733333  | 0.258        | 0.417966667 | 1.336043209 |
| 0.148666667  | -0.018433333 | 0.417733333 | 1.335827142 |
| 0.704133333  | 0.223666667  | 0.417577778 | 1.335683117 |
| 0.383733333  | 0.1997       | 0.417355556 | 1.335477394 |
| 0.382966667  | 0.3511       | 0.417111111 | 1.335251136 |
| 0.151933333  | 0.166066667  | 0.417       | 1.335148303 |
| -0.1293      | -0.066466667 | 0.416966667 | 1.335117455 |
| 0.191633333  | 0.347533333  | 0.416388889 | 1.334582868 |
| 0.0779       | 0.082566667  | 0.416033333 | 1.334253997 |
| -0.0548      | 0.128266667  | 0.4159      | 1.334130692 |
| 0.356733333  | 0.3691       | 0.415766667 | 1.334007397 |
| 0.2674       | 0.262466667  | 0.415366667 | 1.333637583 |
| -0.114333333 | 0.088066667  | 0.414911111 | 1.333216531 |
| 0.437733333  | 0.670233333  | 0.413833333 | 1.332220912 |
| 0.215266667  | 0.0339       | 0.413811111 | 1.332200392 |
| -0.130866667 | 0.0329       | 0.413611111 | 1.332015722 |
| 0.368366667  | 0.5675       | 0.413522222 | 1.331933655 |
| 0.270033333  | -0.202233333 | 0.413488889 | 1.331902881 |
| 0.013066667  | -0.086066667 | 0.413055556 | 1.331502886 |
| 0.1238       | 0.009866667  | 0.412511111 | 1.331000498 |
| -0.034366667 | -0.083766667 | 0.412444444 | 1.330938994 |
| 0.0533       | -0.052933333 | 0.412288889 | 1.330795496 |
| 0.3738       | 0.219666667  | 0.411744444 | 1.330293375 |
| 0.6578       | 0.613866667  | 0.411322222 | 1.329904106 |
| 0.3823       | 0.5151       | 0.4112      | 1.329791444 |
| -0.109666667 | -0.113566667 | 0.411144444 | 1.329740237 |
| -0.0073      | 0.1105       | 0.411144444 | 1.329740237 |
| 0.007533333  | -0.0254      | 0.411133333 | 1.329729996 |
| 0.153833333  | 0.0775       | 0.411077778 | 1.329678791 |

|              |              |             |             |
|--------------|--------------|-------------|-------------|
| 0.1845       | 0.126766667  | 0.410766667 | 1.329392082 |
| 0.099466667  | 0.1888       | 0.410688889 | 1.329320415 |
| 0.4821       | 0.283733333  | 0.4106      | 1.329238514 |
| 0.2126       | 0.325933333  | 0.4106      | 1.329238514 |
| 0.342133333  | 0.294        | 0.410588889 | 1.329228277 |
| 0.297633333  | 0.1803       | 0.410122222 | 1.328798382 |
| -0.056033333 | 0.022466667  | 0.409977778 | 1.328665348 |
| 0.005333333  | 0.052333333  | 0.409688889 | 1.328399319 |
| -0.023033333 | 0.279966667  | 0.409477778 | 1.328204948 |
| 0.135966667  | 0.087133333  | 0.409388889 | 1.328123115 |
| 0.1007       | 0.030266667  | 0.409377778 | 1.328112887 |
| 0.249266667  | 0.2903       | 0.408933333 | 1.327703804 |
| 0.2982       | 0.195433333  | 0.408755556 | 1.327540206 |
| 0.0052       | 0.067833333  | 0.408555556 | 1.327356183 |
| 0.235033333  | 0.325466667  | 0.408433333 | 1.327243737 |
| 0.4696       | 0.066433333  | 0.4084      | 1.327213071 |
| 0.4417       | 0.295133333  | 0.408344444 | 1.327161964 |
| 0.1353       | 0.108933333  | 0.407944444 | 1.326794047 |
| 0.0983       | 0.227        | 0.407844444 | 1.326702084 |
| 0.026366667  | 0.059833333  | 0.4077      | 1.32656926  |
| 0.125733333  | 0.191466667  | 0.407488889 | 1.326375155 |
| 0.137        | -0.1487      | 0.407433333 | 1.32632408  |
| 0.1201       | 0.137833333  | 0.406622222 | 1.325578605 |
| 0.079633333  | 0.182366667  | 0.406433333 | 1.325405061 |
| 0.240766667  | 0.2901       | 0.406355556 | 1.325333608 |
| 0.356833333  | 0.310466667  | 0.405755556 | 1.324782532 |
| 0.135833333  | 0.230666667  | 0.405744444 | 1.324772329 |
| 0.028733333  | 0.048633333  | 0.4057      | 1.324731518 |
| 0.015466667  | 0.070566667  | 0.405677778 | 1.324711113 |
| 0.098        | 0.1378       | 0.4055      | 1.324547884 |
| 0.1397       | 0.578166667  | 0.405477778 | 1.324527482 |
| 0.362266667  | 0.372333333  | 0.405266667 | 1.324333677 |
| 0.210666667  | 0.216833333  | 0.404911111 | 1.324007332 |
| 0.182666667  | -0.005666667 | 0.4049      | 1.323997135 |
| 0.225366667  | 0.2393       | 0.4048      | 1.323905365 |
| 0.2621       | 0.135533333  | 0.404777778 | 1.323884973 |
| 0.1068       | 0.1967       | 0.404644444 | 1.323762626 |
| -0.018733333 | 0.164        | 0.404333333 | 1.323477193 |
| 0.437766667  | 0.2281       | 0.404011111 | 1.323181631 |
| 0.2769       | 0.231733333  | 0.403688889 | 1.322886134 |
| 0.054833333  | 0.260033333  | 0.403655556 | 1.32285557  |
| 0.195133333  | 0.0457       | 0.403611111 | 1.322814818 |
| -0.105166667 | -0.2473      | 0.403455556 | 1.322672196 |
| 0.2838       | 0.377966667  | 0.403344444 | 1.322570332 |
| 0.2518       | 0.175866667  | 0.403122222 | 1.322366629 |
| 0.1613       | 0.319833333  | 0.402988889 | 1.322244422 |
| 0.181633333  | 0.227333333  | 0.4028      | 1.322071314 |

|              |              |             |             |
|--------------|--------------|-------------|-------------|
| 0.197066667  | 0.064266667  | 0.402744444 | 1.322020405 |
| -0.035533333 | 0.026733333  | 0.402533333 | 1.321826966 |
| -0.020266667 | -0.063666667 | 0.402533333 | 1.321826966 |
| 0.100433333  | 0.114066667  | 0.4025      | 1.321796426 |
| 0.413        | 0.3003       | 0.402188889 | 1.321511417 |
| 0.123633333  | 0.32         | 0.402066667 | 1.321399466 |
| 0.1574       | 0.075866667  | 0.401933333 | 1.321277348 |
| 0.218166667  | 0.301366667  | 0.401677778 | 1.321043321 |
| 0.0995       | 0.123933333  | 0.4016      | 1.320972104 |
| 0.2468       | 0.2824       | 0.401166667 | 1.320575391 |
| 0.160066667  | 0.1276       | 0.4011      | 1.320514369 |
| 0.3793       | 0.175533333  | 0.400788889 | 1.320229636 |
| 0.0646       | 0.199066667  | 0.400733333 | 1.320178798 |
| 0.225466667  | 0.457033333  | 0.400677778 | 1.320127961 |
| 0.141666667  | 0.081533333  | 0.400644444 | 1.32009746  |
| -0.032833333 | -0.190966667 | 0.400511111 | 1.319975463 |
| 0.339533333  | 0.5118       | 0.400488889 | 1.319955131 |
| 0.0743       | 0.093033333  | 0.400455556 | 1.319924634 |
| 0.111566667  | 0.0414       | 0.400133333 | 1.319629865 |
| 0.3514       | 0.433366667  | 0.400011111 | 1.319518073 |
| 0.167333333  | 0.1817       | 0.399988889 | 1.319497748 |
| -0.074366667 | -0.0842      | 0.3999      | 1.319416453 |
| 0.012866667  | 0.202633333  | 0.399877778 | 1.319396129 |
| 0.588733333  | 0.447166667  | 0.399666667 | 1.319203075 |
| 0.204266667  | -0.074866667 | 0.399488889 | 1.319040525 |
| 0.2542       | -0.261833333 | 0.399322222 | 1.318888152 |
| 0.2229       | 0.206633333  | 0.398877778 | 1.318481911 |
| 0.1525       | 0.1338       | 0.398655556 | 1.318278837 |
| 0.287966667  | 0.0897       | 0.3986      | 1.318228073 |
| 0.418566667  | 0.3964       | 0.398566667 | 1.318197616 |
| 0.2183       | 0.353966667  | 0.398555556 | 1.318187464 |
| 0.0601       | 0.456733333  | 0.398144444 | 1.317811886 |
| 0.258333333  | 0.0641       | 0.397855556 | 1.317548031 |
| 0.237666667  | 0.288433333  | 0.397744444 | 1.317446562 |
| -0.138633333 | -0.296433333 | 0.397455556 | 1.317182779 |
| 0.3626       | 0.267766667  | 0.397088889 | 1.316848055 |
| 0.143766667  | 0.254        | 0.397022222 | 1.316787205 |
| 0.132033333  | -0.08        | 0.396688889 | 1.316482997 |
| 0.0289       | 0.005733333  | 0.396655556 | 1.316452581 |
| 0.373533333  | 0.2437       | 0.396433333 | 1.316249819 |
| 0.2053       | 0.026933333  | 0.396311111 | 1.316138314 |
| 0.4449       | 0.574733333  | 0.396211111 | 1.31604709  |
| 0.312866667  | 0.2438       | 0.396077778 | 1.315925467 |
| 0.143366667  | 0.0871       | 0.395377778 | 1.31528713  |
| 0.075633333  | 0.107766667  | 0.395133333 | 1.315064292 |
| 0.2103       | 0.380966667  | 0.395133333 | 1.315064292 |
| 0.205066667  | 0.1697       | 0.395077778 | 1.315013653 |

|              |              |             |             |
|--------------|--------------|-------------|-------------|
| 0.003566667  | 0.066533333  | 0.394944444 | 1.314892125 |
| 0.4262       | 0.3063       | 0.394844444 | 1.314800987 |
| 0.191133333  | 0.1454       | 0.394544444 | 1.31452761  |
| 0.2594       | 0.386433333  | 0.394077778 | 1.31410247  |
| 0.168333333  | 0.199066667  | 0.394022222 | 1.314051868 |
| 0.0205       | 0.074966667  | 0.393877778 | 1.31392031  |
| 0.0795       | 0.221566667  | 0.3936      | 1.313667351 |
| 0.220466667  | 0.1919       | 0.393366667 | 1.313454903 |
| -0.043133333 | -0.016433333 | 0.393333333 | 1.313424556 |
| -0.008566667 | 0.102233333  | 0.393277778 | 1.313373979 |
| 0.073466667  | 0.216466667  | 0.393       | 1.313121125 |
| 0.358333333  | 0.1121       | 0.392711111 | 1.312858209 |
| 0.199966667  | 0.294033333  | 0.392677778 | 1.312827876 |
| 0.337866667  | 0.406233333  | 0.392244444 | 1.312433609 |
| 0.252033333  | -0.015266667 | 0.391688889 | 1.311928312 |
| 0.341566667  | 0.295233333  | 0.391677778 | 1.311918208 |
| 0.235533333  | 0.327033333  | 0.391566667 | 1.311817173 |
| 0.043266667  | 0.149        | 0.391255556 | 1.311534316 |
| 0.081        | 0.109766667  | 0.391244444 | 1.311524215 |
| 0.2674       | 0.2507       | 0.391044444 | 1.311342412 |
| 0.229866667  | 0.289466667  | 0.390911111 | 1.311221223 |
| 0.076466667  | 0.071233333  | 0.390811111 | 1.31113034  |
| 0.2197       | 0.336233333  | 0.3904      | 1.310756772 |
| 0.2616       | 0.122433333  | 0.390255556 | 1.310625544 |
| 0.244166667  | -0.015666667 | 0.3902      | 1.310575076 |
| 0.284766667  | 0.3432       | 0.390144444 | 1.310524609 |
| 0.200066667  | 0.065066667  | 0.3901      | 1.310484237 |
| 0.153        | 0.200866667  | 0.390066667 | 1.310453958 |
| 0.248633333  | 0.258933333  | 0.389922222 | 1.310322761 |
| 0.010166667  | 0.0375       | 0.389866667 | 1.310272303 |
| 0.0884       | 0.034866667  | 0.389       | 1.309485423 |
| 0.094666667  | 0.322933333  | 0.388944444 | 1.309434998 |
| 0.328666667  | 0.343766667  | 0.388811111 | 1.309313986 |
| 0.180833333  | 0.0744       | 0.388777778 | 1.309283735 |
| 0.2881       | 0.244        | 0.388344444 | 1.308890533 |
| 0.0401       | 0.244166667  | 0.388311111 | 1.308860291 |
| 0.3004       | 0.2463       | 0.388166667 | 1.308729253 |
| 0.132866667  | 0.255033333  | 0.388077778 | 1.308648621 |
| -0.009033333 | 0.080766667  | 0.387877778 | 1.308467216 |
| -0.011466667 | -0.0957      | 0.387666667 | 1.308275761 |
| 0.429933333  | 0.264366667  | 0.387655556 | 1.308265685 |
| 0.001833333  | 0.091233333  | 0.387433333 | 1.308064185 |
| 0.406866667  | 0.3011       | 0.387288889 | 1.307933226 |
| 0.099033333  | 0.341333333  | 0.387233333 | 1.307882861 |
| -0.0014      | -0.004766667 | 0.387077778 | 1.307741849 |
| 0.057866667  | 0.034733333  | 0.386677778 | 1.307379316 |
| 0.0265       | -0.106666667 | 0.386244444 | 1.306986686 |



|             |              |             |             |
|-------------|--------------|-------------|-------------|
| 0.113933333 | -0.0234      | 0.386244444 | 1.306986686 |
| 0.2792      | 0.176833333  | 0.386222222 | 1.306966554 |
| 0.316733333 | 0.260466667  | 0.3861      | 1.306855835 |
| 0.395266667 | -0.035833333 | 0.386022222 | 1.306785383 |
| 0.110133333 | 0.023266667  | 0.385966667 | 1.306735062 |
| 0.392433333 | 0.2624       | 0.385633333 | 1.306433177 |
| 0.183133333 | 0.0239       | 0.385622222 | 1.306423115 |
| 0.194633333 | 0.436333333  | 0.385544444 | 1.306352686 |
| 0.1033      | 0.104233333  | 0.385522222 | 1.306332564 |
| 0.162533333 | 0.214833333  | 0.384722222 | 1.30560838  |
| 0.206333333 | 0.200466667  | 0.384588889 | 1.305487722 |
| 0.101       | 0.3997       | 0.384577778 | 1.305477667 |
| 0.188533333 | 0.1372       | 0.3844      | 1.305316808 |
| 0.1168      | 0.042233333  | 0.383911111 | 1.304874548 |
| 0.097833333 | 0.131933333  | 0.383866667 | 1.30483435  |
| 0.375666667 | 0.2436       | 0.383788889 | 1.304764006 |
| 0.0728      | 0.111566667  | 0.383577778 | 1.304573093 |
| 0.1703      | 0.200166667  | 0.383533333 | 1.304532904 |
| 0.465766667 | 0.250733333  | 0.383222222 | 1.304251617 |
| 0.085233333 | 0.044266667  | 0.382866667 | 1.303930221 |
| 0.0217      | 0.182433333  | 0.382711111 | 1.303789635 |
| 0.1665      | 0.188633333  | 0.382644444 | 1.303729389 |
| 0.025733333 | -0.0445      | 0.382533333 | 1.303628984 |
| 0.052633333 | 0.0445       | 0.382122222 | 1.303257554 |
| 0.195       | 0.114166667  | 0.3821      | 1.30323748  |
| 0.0222      | 0.015433333  | 0.381888889 | 1.30304679  |
| 0.076066667 | 0.243966667  | 0.3818      | 1.302966507 |
| 0.2973      | 0.085133333  | 0.380977778 | 1.302224131 |
| 0.421566667 | 0.435766667  | 0.380966667 | 1.302214102 |
| 0.008133333 | 0.064066667  | 0.3807      | 1.301973424 |
| 0.303366667 | 0.244033333  | 0.380677778 | 1.301953369 |
| 0.2107      | 0.381766667  | 0.380644444 | 1.301923288 |
| 0.272533333 | 0.325466667  | 0.380277778 | 1.301592441 |
| 0.271766667 | 0.151366667  | 0.380222222 | 1.30154232  |
| 0.249166667 | 0.342266667  | 0.380055556 | 1.301391969 |
| 0.1525      | 0.256733333  | 0.3799      | 1.301251656 |
| 0.251166667 | 0.044966667  | 0.379844444 | 1.301201549 |
| 0.098433333 | -0.049066667 | 0.379811111 | 1.301171485 |
| 0.033633333 | -0.037766667 | 0.3798      | 1.301161464 |
| 0.043166667 | 0.1048       | 0.379655556 | 1.301031196 |
| 0.247966667 | 0.2881       | 0.3796      | 1.300981097 |
| 0.165933333 | 0.214866667  | 0.379388889 | 1.300790737 |
| 0.1321      | -0.105933333 | 0.3791      | 1.300530289 |
| 0.292366667 | 0.065733333  | 0.378733333 | 1.300199796 |
| 0.222733333 | 0.395966667  | 0.378444444 | 1.299939467 |
| 0.195666667 | 0.268066667  | 0.3782      | 1.299719229 |
| 0.2313      | 0.4731       | 0.378166667 | 1.2996892   |

|              |              |             |             |
|--------------|--------------|-------------|-------------|
| 0.0759       | 0.121733333  | 0.377977778 | 1.299519045 |
| 0.168733333  | 0.056933333  | 0.377877778 | 1.299428973 |
| 0.3752       | 0.489        | 0.376811111 | 1.298468586 |
| 0.286233333  | 0.263666667  | 0.376455556 | 1.298148615 |
| 0.257166667  | 0.110533333  | 0.376422222 | 1.298118622 |
| 0.134266667  | 0.0242       | 0.3764      | 1.298098626 |
| 0.2131       | 0.073666667  | 0.3763      | 1.298008652 |
| 0.128566667  | 0.030166667  | 0.376288889 | 1.297998655 |
| 0.139766667  | 0.205933333  | 0.376022222 | 1.297758757 |
| 0.373366667  | 0.239966667  | 0.375833333 | 1.297588855 |
| 0.0772       | 0.123866667  | 0.375766667 | 1.297528895 |
| 0.1693       | 0.211333333  | 0.375511111 | 1.297299074 |
| 0.278366667  | 0.318933333  | 0.3755      | 1.297289083 |
| 0.220333333  | 0.2879       | 0.375322222 | 1.297129233 |
| 0.320366667  | 0.443        | 0.375177778 | 1.296999369 |
| 0.161133333  | 0.253666667  | 0.375011111 | 1.296849542 |
| -0.081433333 | -0.091233333 | 0.374833333 | 1.296689747 |
| 0.190033333  | 0.198933333  | 0.374622222 | 1.296500014 |
| 0.142633333  | 0.2063       | 0.373866667 | 1.295821201 |
| 0.301266667  | 0.3462       | 0.373777778 | 1.295741364 |
| 0.310366667  | 0.201066667  | 0.373655556 | 1.295631596 |
| 0.1289       | 0.0919       | 0.373644444 | 1.295621617 |
| 0.129666667  | 0.4098       | 0.373044444 | 1.295082895 |
| 0.210166667  | 0.023433333  | 0.373033333 | 1.295072921 |
| 0.3247       | 0.313733333  | 0.372922222 | 1.294973183 |
| 0.400633333  | 0.083433333  | 0.372544444 | 1.294634132 |
| 0.224933333  | 0.3524       | 0.371933333 | 1.294085854 |
| -0.001666667 | 0.2879       | 0.371611111 | 1.293796855 |
| 0.197266667  | 0.1651       | 0.371555556 | 1.293747034 |
| 0.387866667  | 0.494166667  | 0.371488889 | 1.293687252 |
| 0.2231       | 0.3534       | 0.371366667 | 1.293577658 |
| 0.296933333  | 0.031633333  | 0.371222222 | 1.29344815  |
| -0.020133333 | 0.017        | 0.370977778 | 1.293229012 |
| 0.118333333  | 0.069433333  | 0.370577778 | 1.292870502 |
| 0.262466667  | 0.242266667  | 0.370233333 | 1.292561865 |
| 0.093833333  | 0.0079       | 0.370011111 | 1.292362784 |
| 0.217933333  | 0.074133333  | 0.369811111 | 1.292183637 |
| 0.1335       | 0.0493       | 0.369577778 | 1.291974663 |
| 0.1529       | 0.1727       | 0.369133333 | 1.291576712 |
| 0.2703       | 0.2467       | 0.368922222 | 1.291387728 |
| -0.078633333 | 0.243833333  | 0.3687      | 1.291188827 |
| 0.057566667  | 0.0409       | 0.368633333 | 1.291129163 |
| -0.126633333 | -0.205766667 | 0.368366667 | 1.290890534 |
| -0.075933333 | 0.2206       | 0.368233333 | 1.290771236 |
| -0.0289      | 0.041566667  | 0.367933333 | 1.290502855 |
| -0.027833333 | 0.092033333  | 0.367877778 | 1.290453161 |
| -0.149666667 | -0.193433333 | 0.367422222 | 1.290045743 |

|              |              |             |             |
|--------------|--------------|-------------|-------------|
| 0.113833333  | -0.080566667 | 0.3674      | 1.290025872 |
| 0.170166667  | 0.2356       | 0.367311111 | 1.289946392 |
| 0.062866667  | 0.016366667  | 0.367266667 | 1.289906654 |
| 0.0902       | 0.243333333  | 0.367088889 | 1.289747714 |
| 0.126        | 0.0179       | 0.366788889 | 1.289479546 |
| 0.533633333  | 0.308766667  | 0.366511111 | 1.289231292 |
| 0.178233333  | 0.127966667  | 0.366433333 | 1.28916179  |
| 0.179        | 0.249866667  | 0.366077778 | 1.288844112 |
| 0.406833333  | 0.428566667  | 0.365733333 | 1.288536436 |
| 0.070333333  | -0.040066667 | 0.365344444 | 1.288189149 |
| 0.2552       | 0.102433333  | 0.365311111 | 1.288159386 |
| 0.253233333  | 0.4236       | 0.365144444 | 1.28801058  |
| 0.057866667  | 0.110666667  | 0.364922222 | 1.2878122   |
| 0.009866667  | -0.078166667 | 0.364844444 | 1.287742774 |
| 0.174333333  | 0.288266667  | 0.364566667 | 1.287494855 |
| 0.1933       | 0.229733333  | 0.364455556 | 1.2873957   |
| 0.279633333  | 0.3498       | 0.364088889 | 1.287068545 |
| 0.168333333  | -0.008633333 | 0.364088889 | 1.287068545 |
| 0.211066667  | 0.193533333  | 0.364022222 | 1.287009071 |
| 0.044066667  | 0.081966667  | 0.363822222 | 1.286830666 |
| 0.2264       | 0.078833333  | 0.363711111 | 1.286731563 |
| 0.168        | 0.365466667  | 0.363566667 | 1.28660274  |
| 0.024133333  | 0.036        | 0.363055556 | 1.28614701  |
| 0.159566667  | 0.063433333  | 0.362988889 | 1.286087578 |
| 0.289533333  | 0.329733333  | 0.362988889 | 1.286087578 |
| -0.075766667 | 0.0198       | 0.362822222 | 1.285939012 |
| 0.073266667  | 0.081333333  | 0.3628      | 1.285919205 |
| 0.195133333  | 0.1557       | 0.362611111 | 1.285750853 |
| 0.098066667  | 0.1519       | 0.362155556 | 1.28534492  |
| 0.1117       | -0.040133333 | 0.3621      | 1.285295424 |
| 0.098266667  | 0.385733333  | 0.362033333 | 1.285236032 |
| -0.023566667 | -0.064033333 | 0.361977778 | 1.285186541 |
| 0.1883       | 0.223633333  | 0.361722222 | 1.284958907 |
| 0.0249       | -0.016566667 | 0.3617      | 1.284939114 |
| 0.262033333  | 0.233066667  | 0.361644444 | 1.284889634 |
| 0.1652       | 0.1105       | 0.361622222 | 1.284869843 |
| 0.084133333  | 0.136166667  | 0.361355556 | 1.284632371 |
| -0.096466667 | -0.059833333 | 0.361311111 | 1.284592796 |
| 0.171066667  | 0.1755       | 0.3613      | 1.284582903 |
| 0.270966667  | 0.102933333  | 0.361144444 | 1.284444403 |
| 0.276633333  | 0.197266667  | 0.361055556 | 1.284365267 |
| 0.188933333  | 0.159966667  | 0.361055556 | 1.284365267 |
| 0.074066667  | 0.105033333  | 0.360755556 | 1.284098218 |
| 0.0876       | 0.015466667  | 0.360611111 | 1.283969659 |
| -0.026266667 | 0.0618       | 0.3605      | 1.283870776 |
| 0.253033333  | 0.229733333  | 0.360366667 | 1.283752127 |
| 0.208433333  | 0.2413       | 0.360255556 | 1.283653261 |

|              |              |             |             |
|--------------|--------------|-------------|-------------|
| 0.0232       | 0.079833333  | 0.360233333 | 1.283633488 |
| 0.200933333  | 0.273066667  | 0.360177778 | 1.283584059 |
| 0.347433333  | 0.4515       | 0.360055556 | 1.283475321 |
| 0.072233333  | 0.1505       | 0.359944444 | 1.283376476 |
| 0.289366667  | 0.081666667  | 0.359833333 | 1.283277639 |
| 0.1785       | 0.142633333  | 0.359833333 | 1.283277639 |
| 0.117233333  | 0.068266667  | 0.359677778 | 1.28313928  |
| 0.021233333  | 0.006733333  | 0.359588889 | 1.283060224 |
| 0.089566667  | 0.051766667  | 0.359555556 | 1.283030579 |
| 0.095966667  | 0.003933333  | 0.359011111 | 1.28254648  |
| 0.229433333  | 0.301466667  | 0.359       | 1.282536603 |
| 0.120766667  | 0.0792       | 0.358977778 | 1.282516848 |
| 0.0322       | 0.139866667  | 0.358755556 | 1.282319313 |
| 0.2785       | 0.291666667  | 0.358366667 | 1.281973701 |
| 0.239233333  | 0.3697       | 0.358355556 | 1.281963828 |
| 0.1507       | 0.079933333  | 0.358311111 | 1.281924336 |
| 0.1652       | 0.2193       | 0.358033333 | 1.281677537 |
| 0.220966667  | 0.256233333  | 0.357844444 | 1.281509741 |
| 0.082333333  | 0.156        | 0.357644444 | 1.281332098 |
| -0.0614      | -0.167366667 | 0.3576      | 1.281292625 |
| 0.205433333  | 0.053366667  | 0.3575      | 1.281203816 |
| 0.0078       | 0.223633333  | 0.357411111 | 1.281124879 |
| 0.072966667  | 0.082766667  | 0.357366667 | 1.281085413 |
| -0.017466667 | 0.218466667  | 0.357033333 | 1.280789454 |
| -0.001766667 | 0.2165       | 0.357011111 | 1.280769725 |
| 0.222266667  | 0.245766667  | 0.356988889 | 1.280749997 |
| 0.2757       | 0.169133333  | 0.356944444 | 1.280710543 |
| 0.2544       | 0.268        | 0.356544444 | 1.280355503 |
| 0.165766667  | 0.1895       | 0.356444444 | 1.280266759 |
| 0.1589       | 0.039666667  | 0.3564      | 1.280227319 |
| -0.127833333 | 0.0247       | 0.356388889 | 1.280217459 |
| -0.0366      | 0.002266667  | 0.356355556 | 1.28018788  |
| 0.011066667  | -0.091233333 | 0.356266667 | 1.280109006 |
| 0.049433333  | 0.148266667  | 0.356122222 | 1.279980847 |
| 0.186066667  | 0.047666667  | 0.356055556 | 1.2799217   |
| 0.268166667  | 0.2189       | 0.355944444 | 1.279823129 |
| 0.241166667  | 0.258766667  | 0.355833333 | 1.279724566 |
| 0.277933333  | 0.082766667  | 0.355644444 | 1.279557025 |
| -0.004466667 | -0.0532      | 0.355644444 | 1.279557025 |
| 0.173        | 0.182366667  | 0.355577778 | 1.279497898 |
| 0.122466667  | 0.397166667  | 0.355455556 | 1.279389507 |
| -0.031633333 | 0.1824       | 0.355088889 | 1.279064386 |
| 0.061933333  | 0.064466667  | 0.355055556 | 1.279034834 |
| 0.2688       | 0.080966667  | 0.354788889 | 1.27879844  |
| 0.3179       | 0.276533333  | 0.354588889 | 1.278621173 |
| 0.009866667  | 0.0566       | 0.354277778 | 1.278345473 |
| -0.0375      | -0.0276      | 0.354166667 | 1.278247024 |

|              |              |             |             |
|--------------|--------------|-------------|-------------|
| 0.1775       | 0.113333333  | 0.354011111 | 1.278109207 |
| 0.4513       | -0.027966667 | 0.353788889 | 1.277912351 |
| 0.3564       | 0.2139       | 0.353477778 | 1.277636805 |
| 0.293166667  | 0.0161       | 0.353333333 | 1.277508892 |
| 0.387166667  | -0.114766667 | 0.353311111 | 1.277489215 |
| -0.1204      | 0.091133333  | 0.3533      | 1.277479376 |
| 0.3487       | 0.2793       | 0.353088889 | 1.277292455 |
| 0.308433333  | 0.011066667  | 0.353022222 | 1.277233433 |
| 0.338666667  | 0.2864       | 0.353       | 1.277213759 |
| 0.2674       | 0.2343       | 0.352933333 | 1.277154741 |
| 0.064033333  | 0.040233333  | 0.352833333 | 1.277066218 |
| 0.188366667  | 0.318566667  | 0.352688889 | 1.276938363 |
| 0.258833333  | 0.176533333  | 0.352644444 | 1.276899026 |
| 0.148066667  | 0.057633333  | 0.352577778 | 1.276840022 |
| -0.000666667 | -0.005633333 | 0.352422222 | 1.276702357 |
| 0.0221       | 0.187266667  | 0.3524      | 1.276682691 |
| 0.045433333  | 0.2145       | 0.352166667 | 1.276476225 |
| 0.2018       | -0.020866667 | 0.351911111 | 1.276250133 |
| 0.246766667  | 0.201966667  | 0.3518      | 1.276151844 |
| 0.093633333  | 0.3184       | 0.350633333 | 1.275120274 |
| 0.196133333  | 0.197466667  | 0.350366667 | 1.274884603 |
| 0.16         | 0.0005       | 0.350344444 | 1.274864966 |
| -0.0325      | 0.141666667  | 0.350322222 | 1.274845329 |
| 0.020533333  | 0.230266667  | 0.3503      | 1.274825692 |
| 0.1722       | 0.249333333  | 0.350233333 | 1.274766784 |
| 0.074433333  | -0.0439      | 0.349933333 | 1.274501731 |
| 0.3379       | -0.1988      | 0.349788889 | 1.274374133 |
| 0.284966667  | 0.536433333  | 0.349788889 | 1.274374133 |
| 0.213066667  | 0.235933333  | 0.349522222 | 1.274138601 |
| 0.2015       | 0.114633333  | 0.349477778 | 1.274099349 |
| 0.003333333  | -0.0221      | 0.349233333 | 1.273883489 |
| 0.282133333  | 0.3592       | 0.348844444 | 1.273540151 |
| 0.023566667  | -0.231833333 | 0.348733333 | 1.273442071 |
| 0.1291       | 0.028366667  | 0.348588889 | 1.273314579 |
| 0.101733333  | -0.097033333 | 0.348388889 | 1.273138073 |
| 0.067333333  | 0.3126       | 0.348244444 | 1.273010611 |
| 0.325166667  | 0.077833333  | 0.348233333 | 1.273000807 |
| 0.287433333  | -0.319966667 | 0.348111111 | 1.272892965 |
| 0.143733333  | 0.292        | 0.3479      | 1.272706715 |
| -0.082866667 | 0.034166667  | 0.347788889 | 1.272608699 |
| 0.0807       | 0.0048       | 0.3477      | 1.272530293 |
| -0.0269      | 0.084766667  | 0.347088889 | 1.271991376 |
| 0.183166667  | -0.096833333 | 0.346933333 | 1.271854233 |
| 0.323333333  | 0.232433333  | 0.346811111 | 1.271746489 |
| 0.145866667  | 0.048166667  | 0.346744444 | 1.271687723 |
| 0.2316       | 0.3397       | 0.346711111 | 1.271658341 |
| 0.2601       | 0.168133333  | 0.3467      | 1.271648547 |

|              |              |             |             |
|--------------|--------------|-------------|-------------|
| 0.252566667  | 0.024933333  | 0.346666667 | 1.271619166 |
| 0.202566667  | 0.261133333  | 0.3465      | 1.271472272 |
| -0.010833333 | -0.148366667 | 0.3462      | 1.271207904 |
| 0.280933333  | 0.2609       | 0.346188889 | 1.271198114 |
| 0.170166667  | 0.123566667  | 0.346144444 | 1.271158953 |
| 0.1373       | 0.155133333  | 0.345944444 | 1.270982745 |
| 0.017666667  | 0.0707       | 0.3459      | 1.270943591 |
| -0.1587      | 0.088966667  | 0.345788889 | 1.270845711 |
| 0.2023       | 0.290333333  | 0.345188889 | 1.270317292 |
| 0.239966667  | 0.347733333  | 0.345155556 | 1.270287941 |
| 0.2241       | 0.3369       | 0.345033333 | 1.27018033  |
| 0.3306       | 0.179033333  | 0.344811111 | 1.269984695 |
| -0.011133333 | 0.0587       | 0.344733333 | 1.26991623  |
| 0.207633333  | 0.363866667  | 0.3447      | 1.26988689  |
| 0.084333333  | 0.0969       | 0.344566667 | 1.269769532 |
| 0.158666667  | 0.085533333  | 0.3445      | 1.269710858 |
| 0.015633333  | 0.025633333  | 0.344388889 | 1.269613073 |
| 0.025533333  | -0.003266667 | 0.344355556 | 1.269583739 |
| -0.009766667 | -0.2377      | 0.343811111 | 1.269104714 |
| 0.252633333  | 0.233266667  | 0.343722222 | 1.269026523 |
| 0.249366667  | 0.405866667  | 0.343622222 | 1.268938564 |
| 0.0548       | 0.1008       | 0.343388889 | 1.268733349 |
| 0.159133333  | 0.051533333  | 0.343055556 | 1.268440244 |
| 0.119233333  | 0.097266667  | 0.3429      | 1.268303484 |
| 0.284466667  | 0.350433333  | 0.342622222 | 1.268059307 |
| 0.303366667  | 0.061166667  | 0.342555556 | 1.268000712 |
| 0.3439       | 0.163133333  | 0.3424      | 1.267864    |
| 0.4623       | 0.256        | 0.341744444 | 1.267288018 |
| 0.1403       | -0.058       | 0.3417      | 1.267248978 |
| 0.1533       | 0.2753       | 0.341655556 | 1.267209939 |
| 0.332066667  | 0.132033333  | 0.341111111 | 1.266731809 |
| -0.069166667 | -0.1021      | 0.341111111 | 1.266731809 |
| 0.428866667  | -0.221333333 | 0.340933333 | 1.266575724 |
| 0.0232       | 0.196066667  | 0.340655556 | 1.26633188  |
| 0.0158       | 0.203666667  | 0.340644444 | 1.266322127 |
| 0.015733333  | 0.044433333  | 0.340544444 | 1.266234356 |
| 0.240966667  | 0.023366667  | 0.340511111 | 1.2662051   |
| 0.1772       | 0.346333333  | 0.3405      | 1.266195348 |
| 0.076366667  | -0.0221      | 0.340177778 | 1.265912578 |
| 0.218533333  | 0.084966667  | 0.340133333 | 1.26587358  |
| 0.018433333  | 0.0343       | 0.339966667 | 1.265727349 |
| 0.188933333  | 0.1469       | 0.339755556 | 1.265542147 |
| 0.114966667  | -0.090166667 | 0.339166667 | 1.265025675 |
| 0.184        | 0.2962       | 0.338655556 | 1.264577588 |
| 0.358866667  | 0.090033333  | 0.338577778 | 1.264509414 |
| 0.207366667  | 0.232333333  | 0.338422222 | 1.264373078 |
| 0.422466667  | 0.385166667  | 0.338355556 | 1.264314653 |

|              |              |             |             |
|--------------|--------------|-------------|-------------|
| 0.272133333  | 0.310433333  | 0.338288889 | 1.264256231 |
| 0.1948       | 0.282133333  | 0.337711111 | 1.263750017 |
| 0.3055       | 0.441866667  | 0.337533333 | 1.263594299 |
| 0.075333333  | 0.052866667  | 0.337133333 | 1.263244005 |
| 0.132        | 0.287333333  | 0.3371      | 1.263214818 |
| 0.2963       | 0.3079       | 0.337011111 | 1.26313699  |
| 0.219633333  | 0.028666667  | 0.336822222 | 1.262971621 |
| 0.2944       | 0.0108       | 0.336788889 | 1.262942441 |
| 0.2193       | 0.0357       | 0.336766667 | 1.262922987 |
| 0.000166667  | -0.041233333 | 0.336722222 | 1.262884082 |
| 0.011366667  | 0.2334       | 0.336555556 | 1.262738196 |
| 0.0334       | -0.039266667 | 0.336522222 | 1.262709021 |
| -0.013066667 | 0.079966667  | 0.336388889 | 1.262592327 |
| 0.038266667  | 0.051266667  | 0.336211111 | 1.262436752 |
| 0.021133333  | 0.0615       | 0.336055556 | 1.26230064  |
| 0.720266667  | 0.623366667  | 0.335744444 | 1.26202846  |
| 0.187866667  | 0.102466667  | 0.335666667 | 1.261960424 |
| 0.2516       | -0.347266667 | 0.335644444 | 1.261940985 |
| -0.021033333 | 0.0967       | 0.3356      | 1.26190211  |
| 0.347633333  | 0.257933333  | 0.335566667 | 1.261872954 |
| 0.083766667  | -0.035266667 | 0.335377778 | 1.261707751 |
| 0.053033333  | 0.0306       | 0.335077778 | 1.261445413 |
| 0.076333333  | 0.1375       | 0.3349      | 1.26128998  |
| 0.206566667  | -0.116666667 | 0.3348      | 1.261202557 |
| -0.0285      | 0.199133333  | 0.334744444 | 1.261153991 |
| 0.105666667  | 0.212533333  | 0.3347      | 1.26111514  |
| 0.209166667  | 0.1601       | 0.334644444 | 1.261066578 |
| 0.2916       | 0.2222       | 0.334577778 | 1.261008305 |
| 0.135533333  | 0.018566667  | 0.334444444 | 1.260891769 |
| 0.7926       | 0.8301       | 0.334422222 | 1.260872347 |
| 0.093933333  | 0.063533333  | 0.334411111 | 1.260862636 |
| 0.2448       | 0.171033333  | 0.334411111 | 1.260862636 |
| 0.0002       | 0.243266667  | 0.334244444 | 1.260716984 |
| 0.1118       | 0.295166667  | 0.334222222 | 1.260697565 |
| 0.049266667  | 0.132        | 0.333788889 | 1.260318954 |
| 0.133966667  | 0.462466667  | 0.333688889 | 1.260231599 |
| 0.070133333  | 0.124        | 0.3336      | 1.260153954 |
| 0.271866667  | 0.137866667  | 0.333533333 | 1.260095724 |
| 0.205166667  | 0.132333333  | 0.333522222 | 1.260086019 |
| 0.170566667  | 0.2894       | 0.333233333 | 1.259833722 |
| 0.082433333  | 0.175433333  | 0.333222222 | 1.259824019 |
| 0.214733333  | 0.254833333  | 0.332922222 | 1.259562073 |
| 0.3654       | 0.440366667  | 0.332911111 | 1.259552373 |
| 0.360466667  | 0.032133333  | 0.332788889 | 1.25944567  |
| 0.5935       | 0.5334       | 0.332677778 | 1.259348676 |
| -0.009933333 | 0.196966667  | 0.332644444 | 1.259319579 |
| 0.133133333  | 0.136166667  | 0.332433333 | 1.259135315 |

|              |              |             |             |
|--------------|--------------|-------------|-------------|
| 0.055366667  | 0.143633333  | 0.332366667 | 1.259077132 |
| 0.281666667  | 0.295533333  | 0.332155556 | 1.258892904 |
| 0.1119       | 0.151866667  | 0.332133333 | 1.258873513 |
| 0.330266667  | 0.2707       | 0.331466667 | 1.258291924 |
| 0.207566667  | 0.1966       | 0.331333333 | 1.258175639 |
| 0.170466667  | -0.057666667 | 0.331255556 | 1.25810781  |
| 0.2112       | 0.217033333  | 0.330877778 | 1.257778411 |
| 0.149566667  | 0.177033333  | 0.330688889 | 1.257613743 |
| 0.1304       | 0.281133333  | 0.330611111 | 1.257545946 |
| 0.140433333  | 0.121433333  | 0.3303      | 1.25727479  |
| 0.256266667  | 0.336066667  | 0.330122222 | 1.257119871 |
| 0.1175       | 0.286233333  | 0.329944444 | 1.25696497  |
| 0.2458       | 0.282966667  | 0.329833333 | 1.256868167 |
| 0.0203       | 0.090166667  | 0.329822222 | 1.256858487 |
| 0.0614       | 0.054533333  | 0.329611111 | 1.256674583 |
| 0.291833333  | 0.099533333  | 0.329355556 | 1.256451999 |
| 0.0988       | 0.3093       | 0.329133333 | 1.256258479 |
| 0.0909       | 0.0645       | 0.3287      | 1.255881201 |
| 0.301133333  | 0.205633333  | 0.328655556 | 1.255842512 |
| -0.103333333 | -0.089933333 | 0.328366667 | 1.255591064 |
| -0.0122      | -0.016666667 | 0.328355556 | 1.255581394 |
| -0.060733333 | 0.112366667  | 0.328288889 | 1.255523375 |
| 0.116233333  | 0.288133333  | 0.328233333 | 1.255475028 |
| 0.080233333  | 0.134033333  | 0.328177778 | 1.255426683 |
| 0.208433333  | 0.208133333  | 0.328022222 | 1.255291327 |
| 0.160733333  | 0.1441       | 0.327933333 | 1.255213987 |
| 0.251366667  | 0.258166667  | 0.327888889 | 1.255175319 |
| 0.267466667  | 0.275533333  | 0.3277      | 1.255010992 |
| 0.123866667  | 0.001333333  | 0.327555556 | 1.254885345 |
| -0.096533333 | 0.1025       | 0.327377778 | 1.25473072  |
| 0.072933333  | -0.057566667 | 0.327233333 | 1.254605101 |
| 0.047933333  | -0.033633333 | 0.326788889 | 1.25421866  |
| 0.075166667  | 0.042533333  | 0.326711111 | 1.254151045 |
| 0.064966667  | 0.1816       | 0.326622222 | 1.254073775 |
| 0.0523       | 0.0288       | 0.326577778 | 1.254035142 |
| 0.0499       | 0.072        | 0.326266667 | 1.253764744 |
| 0.032833333  | 0.0697       | 0.326155556 | 1.253668187 |
| 0.0568       | 0.3428       | 0.325877778 | 1.253426828 |
| 0.177        | 0.1022       | 0.325711111 | 1.253282035 |
| -0.0427      | 0.114766667  | 0.325688889 | 1.25326273  |
| 0.232233333  | 0.137933333  | 0.325488889 | 1.253089003 |
| 0.102333333  | 0.134166667  | 0.325322222 | 1.252944249 |
| -0.016933333 | 0.208966667  | 0.325311111 | 1.2529346   |
| 0.231166667  | 0.1166       | 0.325244444 | 1.252876703 |
| 0.143466667  | 0.276466667  | 0.324877778 | 1.25255832  |
| 0.1746       | 0.206666667  | 0.324744444 | 1.252442564 |
| 0.152        | 0.2303       | 0.324733333 | 1.252432918 |



|              |              |             |             |
|--------------|--------------|-------------|-------------|
| 0.035066667  | 0.0611       | 0.324722222 | 1.252423273 |
| 0.028466667  | -0.059633333 | 0.324711111 | 1.252413627 |
| 0.005166667  | 0.167366667  | 0.324655556 | 1.2523654   |
| 0.5214       | -0.0327      | 0.324633333 | 1.252346109 |
| 0.115166667  | 0.2025       | 0.3245      | 1.252230373 |
| 0.2259       | 0.077        | 0.324433333 | 1.252172509 |
| 0.249633333  | 0.271533333  | 0.324411111 | 1.252153222 |
| 0.124366667  | 0.1864       | 0.3244      | 1.252143578 |
| 0.164733333  | 0.180833333  | 0.324011111 | 1.2518061   |
| 0.284433333  | 0.402633333  | 0.324011111 | 1.2518061   |
| -0.009133333 | 0.0231       | 0.323977778 | 1.251777177 |
| -0.099166667 | -0.0412      | 0.323944444 | 1.251748255 |
| 0.386466667  | 0.2439       | 0.323811111 | 1.251632574 |
| 0.2197       | 0.273533333  | 0.3238      | 1.251622935 |
| 0.253666667  | 0.294666667  | 0.323455556 | 1.251324145 |
| 0.287633333  | 0.184066667  | 0.322911111 | 1.250852009 |
| 0.230933333  | 0.178166667  | 0.322766667 | 1.250726778 |
| 0.525533333  | 0.486066667  | 0.322744444 | 1.250707513 |
| 0.103566667  | -0.0357      | 0.322511111 | 1.250505247 |
| 0.1743       | 0.0182       | 0.322511111 | 1.250505247 |
| 0.137633333  | 0.1651       | 0.322155556 | 1.250197095 |
| 0.032133333  | -0.140933333 | 0.322088889 | 1.250139325 |
| 0.0078       | 0.167966667  | 0.322055556 | 1.250110441 |
| -0.163133333 | -0.087666667 | 0.322044444 | 1.250100813 |
| -0.079766667 | 0.1347       | 0.321955556 | 1.250023793 |
| 0.295366667  | 0.2056       | 0.321877778 | 1.249956404 |
| 0.2457       | 0.334266667  | 0.321188889 | 1.249359691 |
| 0.0858       | 0.193166667  | 0.321155556 | 1.249330825 |
| 0.176633333  | 0.1039       | 0.321111111 | 1.249292338 |
| 0.158966667  | 0.348833333  | 0.321033333 | 1.249224989 |
| 0.3229       | 0.209066667  | 0.320822222 | 1.249042201 |
| 0.343733333  | 0.354        | 0.320433333 | 1.248705558 |
| -0.071066667 | 0.049933333  | 0.320255556 | 1.248551695 |
| 0.207866667  | 0.141        | 0.320177778 | 1.248484385 |
| 0.2143       | 0.155966667  | 0.3195      | 1.247897985 |
| 0.012866667  | -0.010733333 | 0.319333333 | 1.247753831 |
| 0.266833333  | 0.196066667  | 0.319144444 | 1.247590476 |
| 0.1866       | 0.212466667  | 0.319133333 | 1.247580868 |
| 0.083733333  | 0.122166667  | 0.318866667 | 1.247350287 |
| 0.128533333  | 0.229233333  | 0.318611111 | 1.247129354 |
| 0.300433333  | 0.351066667  | 0.318433333 | 1.246975684 |
| -0.029033333 | 0.0519       | 0.3184      | 1.246946873 |
| -0.0598      | 0.039366667  | 0.318055556 | 1.2466492   |
| -0.0367      | 0.0395       | 0.317855556 | 1.246476389 |
| 0.248233333  | 0.392366667  | 0.317844444 | 1.246466789 |
| 0.0136       | 0.2448       | 0.317788889 | 1.246418791 |
| 0.4766       | 0.145833333  | 0.317766667 | 1.246399592 |

|              |              |             |             |
|--------------|--------------|-------------|-------------|
| 0.254366667  | 0.292633333  | 0.317711111 | 1.246351597 |
| 0.2855       | 0.215466667  | 0.317566667 | 1.246226817 |
| -0.011266667 | 0.030966667  | 0.317488889 | 1.246159633 |
| 0.024533333  | 0.0451       | 0.317488889 | 1.246159633 |
| 0.0741       | -0.0612      | 0.317433333 | 1.246111646 |
| 0.168633333  | -0.0116      | 0.317088889 | 1.245814172 |
| 0.0418       | 0.133966667  | 0.316988889 | 1.245727821 |
| 0.163666667  | 0.3255       | 0.316888889 | 1.245641477 |
| -0.125566667 | -0.005066667 | 0.316722222 | 1.245497583 |
| 0.048366667  | -0.0241      | 0.316577778 | 1.245372889 |
| 0.0205       | 0.0141       | 0.316566667 | 1.245363297 |
| 0.1546       | 0.122        | 0.316522222 | 1.245324933 |
| 0.430333333  | 0.2486       | 0.316477778 | 1.245286569 |
| 0.300666667  | 0.266966667  | 0.316377778 | 1.245200255 |
| 0.134066667  | 0.2892       | 0.316322222 | 1.245152306 |
| 0.2732       | 0.2653       | 0.316233333 | 1.245075591 |
| 0.0998       | 0.284        | 0.316033333 | 1.244902998 |
| 0.4798       | 0.544633333  | 0.3159      | 1.24478795  |
| 0.239366667  | -0.308766667 | 0.315866667 | 1.24475919  |
| 0.535333333  | 0.580766667  | 0.315833333 | 1.24473043  |
| 0.0421       | 0.049233333  | 0.315722222 | 1.244634569 |
| 0.1174       | 0.192366667  | 0.315644444 | 1.244567471 |
| 0.335233333  | 0.346033333  | 0.315455556 | 1.244404533 |
| 0.187666667  | 0.091933333  | 0.315433333 | 1.244385365 |
| 0.2615       | 0.234933333  | 0.315422222 | 1.244375782 |
| 0.199366667  | 0.294566667  | 0.315366667 | 1.244327864 |
| 0.126666667  | 0.269733333  | 0.315266667 | 1.244241617 |
| 0.3085       | 0.103833333  | 0.3152      | 1.244184122 |
| 0.3002       | 0.279766667  | 0.314977778 | 1.243992492 |
| 0.1676       | 0.3004       | 0.3147      | 1.243752995 |
| -0.053166667 | -0.005366667 | 0.314644444 | 1.243705102 |
| 0.2266       | 0.216766667  | 0.314522222 | 1.243599742 |
| -0.064833333 | -0.084633333 | 0.314333333 | 1.243436931 |
| 0.183866667  | 0.256266667  | 0.314177778 | 1.243302867 |
| 0.2277       | 0.259366667  | 0.314133333 | 1.243264566 |
| 0.068        | -0.034666667 | 0.314066667 | 1.243207116 |
| 0.054133333  | 0.261466667  | 0.313944444 | 1.243101798 |
| 0.198133333  | 0.176666667  | 0.313655556 | 1.242852901 |
| 0.152066667  | -0.025733333 | 0.313544444 | 1.242757185 |
| 0.2457       | 0.1789       | 0.313388889 | 1.242623195 |
| 0.149566667  | 0.151933333  | 0.313277778 | 1.242527496 |
| 0.294333333  | 0.243133333  | 0.313277778 | 1.242527496 |
| 0.038833333  | 0.070266667  | 0.313266667 | 1.242517927 |
| 0.0572       | 0.041533333  | 0.313211111 | 1.24247008  |
| -0.068933333 | -0.080933333 | 0.313133333 | 1.242403099 |
| 0.165366667  | 0.0773       | 0.312822222 | 1.242135209 |
| 0.122733333  | 0.063933333  | 0.312744444 | 1.242068245 |

|              |              |             |             |
|--------------|--------------|-------------|-------------|
| 0.054633333  | 0.176666667  | 0.312422222 | 1.241790864 |
| -0.021466667 | -0.0642      | 0.312033333 | 1.241456175 |
| 0.082466667  | 0.074733333  | 0.311977778 | 1.24140837  |
| 0.2709       | 0.284        | 0.311811111 | 1.241264965 |
| 0.036066667  | -0.065933333 | 0.311666667 | 1.241140694 |
| 0.191433333  | 0.199733333  | 0.311455556 | 1.24095909  |
| -0.087533333 | -0.404033333 | 0.311411111 | 1.240920861 |
| 0.188533333  | 0.307466667  | 0.311366667 | 1.240882633 |
| 0.2535       | 0.272033333  | 0.311222222 | 1.2407584   |
| 0.1785       | -0.252266667 | 0.311022222 | 1.240586407 |
| -0.021933333 | 0.350633333  | 0.310955556 | 1.240529081 |
| 0.330933333  | 0.275566667  | 0.310944444 | 1.240519527 |
| 0.2613       | 0.354966667  | 0.310755556 | 1.240357119 |
| 0.033833333  | 0.080166667  | 0.310444444 | 1.24008967  |
| 0.436566667  | 0.248833333  | 0.310244444 | 1.239917769 |
| 0.217733333  | 0.290933333  | 0.3101      | 1.239793633 |
| 0.1225       | 0.0132       | 0.309977778 | 1.239688605 |
| 0.164466667  | 0.267233333  | 0.309966667 | 1.239679057 |
| 0.2855       | 0.213066667  | 0.309588889 | 1.239354483 |
| 0.288533333  | 0.176566667  | 0.309288889 | 1.239096793 |
| -0.034266667 | 0.3425       | 0.309066667 | 1.238905946 |
| 0.027666667  | 0.0521       | 0.308811111 | 1.238686509 |
| 0.235033333  | 0.423933333  | 0.3088      | 1.238676969 |
| -0.0158      | 0.036033333  | 0.308633333 | 1.238533879 |
| 0.145633333  | 0.210266667  | 0.3084      | 1.238333582 |
| 0.160066667  | 0.032366667  | 0.3084      | 1.238333582 |
| -0.064366667 | -0.0316      | 0.308322222 | 1.238266824 |
| 0.180666667  | 0.2451       | 0.308177778 | 1.238142853 |
| -0.1525      | -0.035866667 | 0.308155556 | 1.238123782 |
| 0.074733333  | -0.025166667 | 0.308133333 | 1.238104711 |
| 0.0514       | 0.061966667  | 0.307955556 | 1.237952153 |
| 0.0621       | -0.037366667 | 0.307944444 | 1.237942619 |
| 0.148666667  | -0.190333333 | 0.307922222 | 1.237923551 |
| -0.1781      | -0.2266      | 0.307655556 | 1.237694755 |
| 0.0426       | 0.2813       | 0.307622222 | 1.237666159 |
| 0.303333333  | 0.125233333  | 0.307366667 | 1.237446941 |
| 0.338833333  | 0.183833333  | 0.307322222 | 1.23740882  |
| 0.090433333  | 0.1232       | 0.3072      | 1.237303994 |
| 0.216866667  | 0.161833333  | 0.307022222 | 1.237151535 |
| 0.165566667  | -0.028533333 | 0.307022222 | 1.237151535 |
| 0.196166667  | 0.123933333  | 0.306766667 | 1.236932408 |
| 0.293533333  | 0.243133333  | 0.306266667 | 1.236503794 |
| 0.371266667  | 0.285966667  | 0.3062      | 1.236446657 |
| 0.2443       | 0.167633333  | 0.305833333 | 1.236132449 |
| -0.0378      | -0.0726      | 0.305755556 | 1.236065809 |
| 0.2663       | 0.249333333  | 0.305722222 | 1.23603725  |
| 0.001766667  | 0.0823       | 0.305688889 | 1.236008692 |

|              |              |             |             |
|--------------|--------------|-------------|-------------|
| 0.193966667  | 0.135933333  | 0.305588889 | 1.235923021 |
| -0.0119      | 0.069533333  | 0.305544444 | 1.235884948 |
| 0.009933333  | 0.084733333  | 0.305511111 | 1.235856393 |
| 0.1457       | -0.3097      | 0.305488889 | 1.235837357 |
| 0.0577       | 0.249366667  | 0.305422222 | 1.23578025  |
| 0.272166667  | 0.223833333  | 0.305255556 | 1.235637496 |
| 0.022666667  | 0.023833333  | 0.304922222 | 1.235352036 |
| 0.101        | 0.246433333  | 0.304666667 | 1.235133228 |
| 0.135833333  | 0.225933333  | 0.304577778 | 1.23505713  |
| -0.236966667 | -0.232066667 | 0.304211111 | 1.234743275 |
| 0.229633333  | -0.109266667 | 0.304188889 | 1.234724256 |
| 0.179433333  | 0.103766667  | 0.304022222 | 1.234581623 |
| 0.404033333  | 0.048933333  | 0.303866667 | 1.234448514 |
| 0.104733333  | 0.074        | 0.303866667 | 1.234448514 |
| 0.1904       | 0.226766667  | 0.303766667 | 1.234362952 |
| 0.133733333  | 0.044333333  | 0.303733333 | 1.234334432 |
| 0.243766667  | 0.004        | 0.303355556 | 1.234011257 |
| 0.127533333  | 0.097833333  | 0.303355556 | 1.234011257 |
| 0.442666667  | 0.3346       | 0.303311111 | 1.233973242 |
| 0.384033333  | 0.235733333  | 0.3032      | 1.23387821  |
| 0.493666667  | 0.292266667  | 0.303188889 | 1.233868707 |
| 0.1646       | 0.167233333  | 0.303055556 | 1.233754679 |
| 0.012433333  | -0.017366667 | 0.302977778 | 1.233688167 |
| 0.292233333  | 0.311933333  | 0.302866667 | 1.233593156 |
| 0.056933333  | 0.1773       | 0.302844444 | 1.233574155 |
| 0.186666667  | 0.098633333  | 0.302633333 | 1.233393658 |
| 0.264966667  | 0.282433333  | 0.302555556 | 1.233327166 |
| 0.076133333  | -0.2008      | 0.302444444 | 1.233232183 |
| -0.0052      | 0.123466667  | 0.302388889 | 1.233184695 |
| -0.0605      | 0.364833333  | 0.302066667 | 1.232909297 |
| 0.260666667  | 0.380033333  | 0.302033333 | 1.232880811 |
| -0.005166667 | -0.0229      | 0.3018      | 1.232681428 |
| 0.290633333  | 0.299766667  | 0.301666667 | 1.232567509 |
| 0.4148       | 0.541733333  | 0.301611111 | 1.232520046 |
| 0.0743       | 0.151233333  | 0.301566667 | 1.232482077 |
| 0.0803       | -0.043133333 | 0.301422222 | 1.232358685 |
| 0.1278       | 0.032133333  | 0.301388889 | 1.232330212 |
| 0.143333333  | 0.155966667  | 0.301377778 | 1.232320721 |
| 0.378933333  | 0.467266667  | 0.301333333 | 1.232282758 |
| 0.057366667  | 0.126966667  | 0.3012      | 1.232168876 |
| -0.0456      | 0.0518       | 0.301166667 | 1.232140408 |
| 0.094433333  | 0.462933333  | 0.3008      | 1.231827294 |
| 0.1655       | 0.1088       | 0.3007      | 1.231741913 |
| 0.204833333  | -0.1376      | 0.300433333 | 1.23151426  |
| -0.023533333 | 0.0316       | 0.300377778 | 1.231466838 |
| -0.0237      | -0.129166667 | 0.300077778 | 1.231210788 |
| 0.1775       | 0.2385       | 0.300077778 | 1.231210788 |

|              |              |             |             |
|--------------|--------------|-------------|-------------|
| 0.229666667  | 0.311666667  | 0.300044444 | 1.231182341 |
| 0.1703       | 0.1167       | 0.299766667 | 1.230945311 |
| 0.1408       | 0.127333333  | 0.299522222 | 1.230736762 |
| 0.003333333  | 0.154033333  | 0.299455556 | 1.230679892 |
| 0.236166667  | 0.204366667  | 0.299433333 | 1.230660935 |
| 0.240833333  | 0.109966667  | 0.299422222 | 1.230651457 |
| 0.117066667  | 0.0118       | 0.299366667 | 1.230604068 |
| 0.0865       | 0.164        | 0.299355556 | 1.23059459  |
| 0.177866667  | 0.0407       | 0.298944444 | 1.230243969 |
| 0.260033333  | 0.2743       | 0.2989      | 1.23020607  |
| 0.0168       | 0.1341       | 0.298844444 | 1.230158698 |
| 0.018766667  | 0.075        | 0.298733333 | 1.23006396  |
| -0.035566667 | -0.065533333 | 0.298677778 | 1.230016593 |
| 0.1346       | 0.158466667  | 0.298666667 | 1.23000712  |
| 0.104166667  | 0.0534       | 0.298377778 | 1.229760845 |
| -0.053333333 | -0.037333333 | 0.298288889 | 1.229685078 |
| 0.180633333  | 0.298366667  | 0.2982      | 1.229609315 |
| 0.239333333  | 0.2491       | 0.298022222 | 1.229457805 |
| 0.159933333  | 0.2456       | 0.297955556 | 1.229400993 |
| 0.0035       | 0.2482       | 0.2979      | 1.229353652 |
| 0.081066667  | -0.040033333 | 0.297733333 | 1.22921164  |
| 0.140966667  | 0.2567       | 0.297577778 | 1.22907911  |
| -0.005233333 | 0.046066667  | 0.297533333 | 1.229041247 |
| 0.325733333  | 0.1302       | 0.297466667 | 1.228984454 |
| 0.159166667  | 0.011466667  | 0.297433333 | 1.228956059 |
| 0.076866667  | 0.028866667  | 0.297222222 | 1.228776238 |
| 0.207866667  | 0.325833333  | 0.297177778 | 1.228738384 |
| 0.292866667  | 0.2131       | 0.297033333 | 1.228615367 |
| -0.0633      | 0.0065       | 0.296955556 | 1.228549133 |
| 0.404433333  | 0.115333333  | 0.296822222 | 1.228435596 |
| 0.299266667  | -0.332666667 | 0.296722222 | 1.22835045  |
| 0.295        | 0.275833333  | 0.296722222 | 1.22835045  |
| 0.0764       | 0.049266667  | 0.296711111 | 1.22834099  |
| 0.053466667  | 0.1987       | 0.296433333 | 1.228104507 |
| 0.0952       | 0.034966667  | 0.296366667 | 1.228047757 |
| 0.2217       | -0.209166667 | 0.296255556 | 1.227953181 |
| 0.194633333  | 0.2694       | 0.296055556 | 1.227782963 |
| -0.082933333 | -0.010066667 | 0.296033333 | 1.227764051 |
| 0.032633333  | -0.0351      | 0.295655556 | 1.227442596 |
| 0.1712       | 0.2606       | 0.295611111 | 1.227404783 |
| 0.144466667  | 0.201        | 0.295388889 | 1.227215738 |
| 0.119333333  | 0.171433333  | 0.295333333 | 1.227168481 |
| 0.0517       | 0.126        | 0.295311111 | 1.227149578 |
| 0.067466667  | -0.088733333 | 0.295111111 | 1.226979471 |
| 0.0551       | 0.0739       | 0.2951      | 1.226970021 |
| 0.214533333  | 0.255533333  | 0.295066667 | 1.226941673 |
| 0.224433333  | 0.444233333  | 0.294922222 | 1.226818836 |

|              |              |             |             |
|--------------|--------------|-------------|-------------|
| 0.1862       | 0.226066667  | 0.294922222 | 1.226818836 |
| 0.135933333  | 0.3227       | 0.294533333 | 1.226488183 |
| 0.0898       | 0.139        | 0.294522222 | 1.226478737 |
| 0.2069       | 0.262466667  | 0.2944      | 1.226374836 |
| 0.034066667  | 0.039833333  | 0.2942      | 1.226204836 |
| 0.306466667  | 0.229933333  | 0.294177778 | 1.226185949 |
| 0.275066667  | 0.148766667  | 0.294144444 | 1.226157618 |
| 0.1745       | 0.169066667  | 0.2941      | 1.226119845 |
| 0.168366667  | 0.1888       | 0.2941      | 1.226119845 |
| 0.500566667  | -0.030666667 | 0.294       | 1.22603486  |
| 0.036766667  | 0.026333333  | 0.293988889 | 1.226025418 |
| -0.014933333 | 0.177233333  | 0.293988889 | 1.226025418 |
| 0.290233333  | 0.247233333  | 0.293955556 | 1.225997091 |
| 0.029433333  | -0.046666667 | 0.293611111 | 1.225704418 |
| 0.287133333  | 0.190533333  | 0.293533333 | 1.22563834  |
| 0.0099       | 0.1091       | 0.293511111 | 1.225619462 |
| 0.649866667  | 0.6178       | 0.293488889 | 1.225600583 |
| 0.276433333  | 0.056766667  | 0.293111111 | 1.225279695 |
| 0.052933333  | 0.0665       | 0.2931      | 1.225270258 |
| 0.1147       | 0.0436       | 0.293066667 | 1.225241949 |
| 0.128266667  | 0.1977       | 0.292855556 | 1.225062671 |
| 0.083633333  | -0.043566667 | 0.292822222 | 1.225034366 |
| 0.220566667  | 0.2928       | 0.292611111 | 1.224855119 |
| -0.046233333 | 0.0654       | 0.292577778 | 1.224826819 |
| 0.201866667  | -0.091233333 | 0.292544444 | 1.22479852  |
| 0.4194       | 0.369066667  | 0.292433333 | 1.224704194 |
| 0.16         | 0.062966667  | 0.2924      | 1.224675898 |
| 0.369        | 0.274166667  | 0.292311111 | 1.224600444 |
| 0.436733333  | 0.1847       | 0.292311111 | 1.224600444 |
| 0.050866667  | 0.094766667  | 0.2922      | 1.224506133 |
| 0.162766667  | 0.136466667  | 0.292133333 | 1.22444955  |
| -0.014766667 | -0.006533333 | 0.292122222 | 1.22444012  |
| 0.0094       | 0.155433333  | 0.2921      | 1.22442126  |
| 0.121466667  | 0.170566667  | 0.292055556 | 1.22438354  |
| 0.063266667  | 0.047233333  | 0.2919      | 1.224251531 |
| 0.119        | 0.202833333  | 0.291766667 | 1.224138391 |
| 0.222266667  | -0.010966667 | 0.291755556 | 1.224128963 |
| 0.138733333  | 0.283333333  | 0.291711111 | 1.224091253 |
| -0.3299      | -0.1516      | 0.291711111 | 1.224091253 |
| 0.113466667  | 0.2177       | 0.291644444 | 1.224034689 |
| -0.006833333 | 0.083766667  | 0.291522222 | 1.223930996 |
| 0.220233333  | 0.1031       | 0.291377778 | 1.22380846  |
| 0.057533333  | 0.024666667  | 0.291344444 | 1.223780185 |
| 0.036966667  | 0.1795       | 0.291344444 | 1.223780185 |
| 0.189966667  | 0.073033333  | 0.291222222 | 1.223676513 |
| 0.294466667  | 0.098233333  | 0.291155556 | 1.223619968 |
| 0.008466667  | 0.3111       | 0.291088889 | 1.223563426 |

|              |              |             |             |
|--------------|--------------|-------------|-------------|
| 0.2988       | 0.1898       | 0.290977778 | 1.223469196 |
| 0.155        | 0.2405       | 0.290788889 | 1.22330902  |
| 0.1875       | -0.036433333 | 0.290755556 | 1.223280756 |
| 0.2784       | 0.2009       | 0.290666667 | 1.223205388 |
| 0.2806       | 0.154066667  | 0.290655556 | 1.223195967 |
| 0.0591       | -0.026       | 0.290577778 | 1.223130025 |
| 0.079733333  | 0.1269       | 0.290555556 | 1.223111185 |
| 0.079666667  | 0.021066667  | 0.290488889 | 1.223054666 |
| 0.124666667  | 0.1332       | 0.290422222 | 1.222998151 |
| 0.1959       | -0.0759      | 0.290166667 | 1.222781531 |
| 0.225066667  | 0.351433333  | 0.290044444 | 1.222677944 |
| 0.0305       | 0.1157       | 0.290033333 | 1.222668527 |
| 0.258366667  | 0.285233333  | 0.290022222 | 1.22265911  |
| -0.017533333 | -0.034333333 | 0.289755556 | 1.222433136 |
| 0.0796       | 0.265866667  | 0.289711111 | 1.222395478 |
| 0.330666667  | 0.155933333  | 0.289655556 | 1.222348406 |
| 0.151333333  | 0.236433333  | 0.289577778 | 1.22228251  |
| 0.235666667  | 0.1827       | 0.289555556 | 1.222263683 |
| -0.0914      | -0.158633333 | 0.289511111 | 1.222226029 |
| -0.000233333 | 0.026733333  | 0.289355556 | 1.222094253 |
| -0.124833333 | -0.058233333 | 0.288788889 | 1.221614328 |
| 0.267466667  | 0.2146       | 0.288388889 | 1.221275672 |
| 0.200466667  | 0.1167       | 0.288177778 | 1.221096974 |
| 0.0577       | 0.012233333  | 0.288111111 | 1.221040549 |
| 0.102833333  | 0.080333333  | 0.288033333 | 1.220974723 |
| 0.2414       | 0.1824       | 0.287544444 | 1.220561039 |
| 0.288733333  | 0.139533333  | 0.287388889 | 1.220429442 |
| 0.216466667  | 0.198433333  | 0.2873      | 1.220354249 |
| 0.2906       | 0.045233333  | 0.287277778 | 1.220335452 |
| 0.1217       | 0.037566667  | 0.2871      | 1.220185084 |
| -0.028833333 | -0.006433333 | 0.286977778 | 1.220081717 |
| 0.0728       | 0.088233333  | 0.286855556 | 1.219978358 |
| 0.060966667  | 0.4274       | 0.286333333 | 1.219536834 |
| 0.140366667  | 0.1918       | 0.286288889 | 1.219499265 |
| 0.143233333  | 0.324066667  | 0.286177778 | 1.219405347 |
| -0.115266667 | -0.081166667 | 0.286133333 | 1.219367782 |
| 0.009133333  | 0.078433333  | 0.286111111 | 1.219349    |
| 0.0581       | 0.006933333  | 0.286033333 | 1.219283265 |
| 0.059433333  | 0.471833333  | 0.285833333 | 1.219114248 |
| 0.165566667  | 0.160466667  | 0.2854      | 1.218748126 |
| 0.1626       | 0.005        | 0.2852      | 1.218579183 |
| 0.385666667  | 0.247833333  | 0.285166667 | 1.218551028 |
| -0.001833333 | 0.109533333  | 0.285122222 | 1.218513489 |
| -0.076533333 | -0.039433333 | 0.285011111 | 1.218419647 |
| 0.139133333  | 0.346733333  | 0.284977778 | 1.218391496 |
| 0.1009       | 0.0381       | 0.284644444 | 1.218110021 |
| 0.1379       | 0.207533333  | 0.284433333 | 1.217931786 |

|              |              |             |             |
|--------------|--------------|-------------|-------------|
| -0.028133333 | 0.120733333  | 0.284344444 | 1.217856748 |
| 0.100166667  | 0.0977       | 0.284311111 | 1.21782861  |
| 0.234233333  | 0.213766667  | 0.284277778 | 1.217800472 |
| 0.070366667  | 0.182733333  | 0.284077778 | 1.217631661 |
| 0.1665       | 0.057        | 0.283955556 | 1.21752851  |
| 0.010666667  | 0.0413       | 0.2838      | 1.21739724  |
| -0.026033333 | -0.001833333 | 0.283533333 | 1.217172238 |
| 0.3713       | 0.277633333  | 0.2834      | 1.217059752 |
| -0.0123      | 0.083133333  | 0.283377778 | 1.217041006 |
| 0.076566667  | 0.152666667  | 0.283255556 | 1.216937905 |
| 0.120866667  | 0.060933333  | 0.283122222 | 1.216825441 |
| 0.013166667  | 0.071233333  | 0.283011111 | 1.216731729 |
| 0.2512       | 0.183566667  | 0.282766667 | 1.216525589 |
| 0.010666667  | -0.0266      | 0.282644444 | 1.216422532 |
| 0.0946       | 0.247166667  | 0.282555556 | 1.216347586 |
| -0.0318      | -0.0974      | 0.282433333 | 1.216244544 |
| 0.2079       | -0.001666667 | 0.282422222 | 1.216235177 |
| 0.110033333  | 0.401366667  | 0.2824      | 1.216216443 |
| 0.1099       | 0.096466667  | 0.282244444 | 1.216085314 |
| -0.0958      | -0.040566667 | 0.282233333 | 1.216075949 |
| 0.1327       | 0.153166667  | 0.282144444 | 1.216001025 |
| 0.062466667  | 0.0739       | 0.282077778 | 1.215944835 |
| 0.2843       | 0.320566667  | 0.282033333 | 1.215907376 |
| 0.026066667  | 0.1273       | 0.281966667 | 1.215851191 |
| 0.013066667  | 0.182566667  | 0.281911111 | 1.215804371 |
| 0.018266667  | 0.065        | 0.281766667 | 1.21568265  |
| 0.130333333  | -0.050866667 | 0.281744444 | 1.215663924 |
| 0.294966667  | 0.071833333  | 0.2816      | 1.215542217 |
| -0.167566667 | 0.059133333  | 0.281577778 | 1.215523493 |
| 0.173766667  | 0.221366667  | 0.281566667 | 1.215514132 |
| 0.126766667  | -0.058233333 | 0.281422222 | 1.215392439 |
| 0.1047       | -0.0219      | 0.281411111 | 1.215383079 |
| 0.118633333  | 0.204633333  | 0.281377778 | 1.215354998 |
| -0.0345      | 0.065066667  | 0.281188889 | 1.215195884 |
| 0.160066667  | 0.193        | 0.281122222 | 1.215139732 |
| 0.048133333  | 0.248366667  | 0.280555556 | 1.214662539 |
| 0.088166667  | 0.324066667  | 0.280255556 | 1.214409983 |
| 0.020733333  | 0.1448       | 0.280155556 | 1.214325809 |
| 0.1187       | 0.278033333  | 0.279933333 | 1.214138778 |
| 0.148266667  | 0.2252       | 0.279755556 | 1.213989174 |
| 0.179066667  | 0.2893       | 0.279733333 | 1.213970474 |
| 0.0991       | 0.1825       | 0.279655556 | 1.213905029 |
| 0.225533333  | -0.1018      | 0.279511111 | 1.213783498 |
| 0.1857       | 0.3605       | 0.279488889 | 1.213764801 |
| -0.053733333 | 0.204966667  | 0.279355556 | 1.213652631 |
| 0.236133333  | 0.054066667  | 0.279022222 | 1.21337225  |
| 0.279        | 0.1          | 0.278988889 | 1.213344215 |



|              |              |             |             |
|--------------|--------------|-------------|-------------|
| -0.126266667 | -0.024733333 | 0.278855556 | 1.213232084 |
| 0.210766667  | 0.065666667  | 0.278788889 | 1.213176022 |
| 0.205566667  | 0.325333333  | 0.278711111 | 1.21311062  |
| 0.1192       | -0.004633333 | 0.278655556 | 1.213063906 |
| 0.142066667  | 0.003433333  | 0.278488889 | 1.212923775 |
| 0.1401       | -0.018366667 | 0.278266667 | 1.21273696  |
| -0.077033333 | -0.0427      | 0.278188889 | 1.212671581 |
| 0.1408       | 0.405333333  | 0.278188889 | 1.212671581 |
| 0.113266667  | 0.1325       | 0.278177778 | 1.212662242 |
| 0.3246       | 0.386666667  | 0.278166667 | 1.212652902 |
| 0.087266667  | 0.070966667  | 0.278133333 | 1.212624884 |
| 0.370333333  | 0.217633333  | 0.277911111 | 1.212438115 |
| 0.168533333  | 0.3707       | 0.277844444 | 1.212382089 |
| 0.3863       | 0.0613       | 0.277533333 | 1.212120673 |
| 0.253433333  | 0.014966667  | 0.277533333 | 1.212120673 |
| 0.118233333  | 0.0127       | 0.277511111 | 1.212102002 |
| 0.255166667  | 0.032066667  | 0.277344444 | 1.211961983 |
| 0.196533333  | 0.097366667  | 0.277244444 | 1.211877979 |
| 0.137133333  | 0.024166667  | 0.2772      | 1.211840646 |
| 0.1294       | 0.195166667  | 0.277111111 | 1.211765983 |
| 0.387        | 0.199833333  | 0.277066667 | 1.211728653 |
| -0.0308      | 0.063833333  | 0.277055556 | 1.211719321 |
| 0.175233333  | 0.022966667  | 0.277044444 | 1.211709988 |
| 0.009633333  | -0.144233333 | 0.277044444 | 1.211709988 |
| 0.118033333  | 0.252533333  | 0.276722222 | 1.211439386 |
| 0.057566667  | 0.340166667  | 0.276588889 | 1.211327431 |
| 0.2668       | 0.161566667  | 0.276411111 | 1.211178173 |
| 0.081        | 0.0343       | 0.2764      | 1.211168845 |
| -0.0277      | -0.1707      | 0.276288889 | 1.211075568 |
| 0.045        | 0.121533333  | 0.276222222 | 1.211019606 |
| 0.1279       | 0.1584       | 0.2761      | 1.210917015 |
| 0.129666667  | 0.2497       | 0.276055556 | 1.210879712 |
| 0.1362       | 0.208966667  | 0.276011111 | 1.210842409 |
| 0.060066667  | 0.075833333  | 0.275977778 | 1.210814433 |
| 0.146566667  | 0.134066667  | 0.2759      | 1.210749158 |
| 0.210766667  | 0.242666667  | 0.275844444 | 1.210702535 |
| 0.129666667  | 0.1849       | 0.275611111 | 1.210506739 |
| 0.265766667  | 0.150733333  | 0.275488889 | 1.210404192 |
| 0.0977       | 0.208233333  | 0.275455556 | 1.210376226 |
| 0.382433333  | 0.186866667  | 0.275233333 | 1.210189803 |
| 0.0963       | 0.1376       | 0.275222222 | 1.210180482 |
| 0.292166667  | 0.282666667  | 0.275088889 | 1.210068643 |
| 0.111666667  | -0.120333333 | 0.275       | 1.209994089 |
| -0.059966667 | -0.086433333 | 0.274933333 | 1.209938177 |
| 0.281033333  | 0.170233333  | 0.274677778 | 1.20972387  |
| 0.397366667  | 0.212333333  | 0.274577778 | 1.209640022 |
| 0.224333333  | 0.276633333  | 0.274333333 | 1.209435082 |

|              |              |             |             |
|--------------|--------------|-------------|-------------|
| 0.2155       | 0.2247       | 0.274166667 | 1.209295371 |
| 0.184666667  | 0.0468       | 0.274155556 | 1.209286058 |
| -0.010833333 | 0.030833333  | 0.274144444 | 1.209276744 |
| 0.230866667  | 0.1445       | 0.274022222 | 1.209174301 |
| -0.063766667 | 0.135233333  | 0.274022222 | 1.209174301 |
| -0.053333333 | -0.093633333 | 0.273955556 | 1.209118427 |
| 0.216566667  | 0.014766667  | 0.273944444 | 1.209109114 |
| 0.246766667  | -0.0718      | 0.273644444 | 1.208857713 |
| 0.074633333  | 0.1109       | 0.273566667 | 1.208792544 |
| 0.430466667  | 0.252533333  | 0.273355556 | 1.208615673 |
| 0.291766667  | 0.287266667  | 0.273155556 | 1.208448135 |
| 0.0535       | -0.047033333 | 0.273033333 | 1.208345762 |
| 0.2962       | 0.4224       | 0.273033333 | 1.208345762 |
| 0.2319       | -0.116133333 | 0.272922222 | 1.208252703 |
| 0.1368       | 0.036833333  | 0.272911111 | 1.208243397 |
| -0.220833333 | 0.021666667  | 0.2729      | 1.208234092 |
| -0.0361      | -0.0048      | 0.272811111 | 1.208159651 |
| -0.035466667 | 0.021666667  | 0.272722222 | 1.208085215 |
| 0.115533333  | 0.018966667  | 0.272366667 | 1.207787516 |
| 0.2654       | 0.186266667  | 0.272333333 | 1.207759611 |
| 0.1656       | 0.208066667  | 0.271877778 | 1.2073783   |
| 0.343233333  | 0.195066667  | 0.2718      | 1.207313211 |
| 0.249366667  | 0.191233333  | 0.271444444 | 1.207015702 |
| 0.0788       | -0.024566667 | 0.271377778 | 1.206959928 |
| -0.009966667 | 0.1186       | 0.271355556 | 1.206941337 |
| 0.1157       | 0.1032       | 0.271211111 | 1.206820502 |
| 0.134933333  | -0.175133333 | 0.271177778 | 1.206792619 |
| 0.207333333  | 0.134133333  | 0.270744444 | 1.206430197 |
| 0.028966667  | -0.043933333 | 0.270566667 | 1.206281542 |
| 0.394633333  | 0.060166667  | 0.2703      | 1.206058594 |
| 0.162866667  | 0.038966667  | 0.2702      | 1.205975    |
| 0.140666667  | 0.267        | 0.270155556 | 1.205937848 |
| -0.0692      | -0.018666667 | 0.270111111 | 1.205900698 |
| 0.1584       | 0.277733333  | 0.270044444 | 1.205844975 |
| 0.231133333  | 0.287833333  | 0.269933333 | 1.205752109 |
| 0.0933       | 0.0844       | 0.269644444 | 1.20551069  |
| 0.447333333  | 0.468866667  | 0.269555556 | 1.205436417 |
| 0.0472       | 0.021833333  | 0.269488889 | 1.205380716 |
| 0.169833333  | 0.228133333  | 0.269333333 | 1.205250755 |
| 0.115433333  | 0.066666667  | 0.268888889 | 1.204879516 |
| 0.2282       | 0.1621       | 0.2688      | 1.204805282 |
| 0.1343       | 0.0816       | 0.268788889 | 1.204796003 |
| 0.308166667  | 0.271433333  | 0.268644444 | 1.204675383 |
| 0.122233333  | 0.2051       | 0.268633333 | 1.204666105 |
| 0.006066667  | 0.0225       | 0.268588889 | 1.204628994 |
| 0.2131       | 0.231        | 0.268311111 | 1.204397076 |
| 0.000133333  | -0.0229      | 0.268288889 | 1.204378525 |

|              |              |             |             |
|--------------|--------------|-------------|-------------|
| 0.4007       | 0.0335       | 0.268066667 | 1.204193025 |
| -0.018033333 | 0.055966667  | 0.267866667 | 1.2040261   |
| 0.107433333  | 0.0274       | 0.267822222 | 1.203989009 |
| 0.096933333  | 0.2763       | 0.267811111 | 1.203979736 |
| 0.412033333  | 0.300433333  | 0.267711111 | 1.203896286 |
| 0.2935       | 0.190833333  | 0.267611111 | 1.203812841 |
| 0.118966667  | -0.205166667 | 0.267566667 | 1.203775756 |
| 0.389933333  | -0.083966667 | 0.267455556 | 1.203683049 |
| -0.183       | 0.024966667  | 0.267133333 | 1.20341424  |
| 0.065233333  | 0.1287       | 0.266966667 | 1.203275224 |
| 0.4332       | 0.038266667  | 0.266733333 | 1.203080629 |
| 0.205266667  | 0.155566667  | 0.266555556 | 1.202932387 |
| 0.2823       | 0.057266667  | 0.266511111 | 1.202895329 |
| 0.1251       | 0.15         | 0.2665      | 1.202886065 |
| -0.026666667 | -0.049833333 | 0.266477778 | 1.202867537 |
| 0.295966667  | 0.203066667  | 0.266444444 | 1.202839745 |
| 0.026266667  | -0.045533333 | 0.266444444 | 1.202839745 |
| -0.009033333 | 0.0345       | 0.266366667 | 1.2027749   |
| 0.250433333  | 0.540333333  | 0.265788889 | 1.202293303 |
| 0.202133333  | 0.086033333  | 0.2657      | 1.202219228 |
| -0.0134      | 0.276766667  | 0.265666667 | 1.202191452 |
| -0.1255      | -0.020466667 | 0.2655      | 1.202052577 |
| 0.369766667  | 0.3626       | 0.265344444 | 1.201922975 |
| 0.4954       | 0.059466667  | 0.265277778 | 1.201867436 |
| 0.2661       | 0.147433333  | 0.265211111 | 1.201811899 |
| 0.005533333  | -0.0711      | 0.265044444 | 1.201673068 |
| 0.116433333  | 0.241966667  | 0.264766667 | 1.201441719 |
| 0.164733333  | 0.117833333  | 0.264711111 | 1.201395455 |
| 0.2078       | 0.1109       | 0.264666667 | 1.201358445 |
| 0.360333333  | 0.2007       | 0.264666667 | 1.201358445 |
| 0.0023       | -0.0159      | 0.264633333 | 1.201330688 |
| 0.0916       | 0.070066667  | 0.264433333 | 1.20116416  |
| 0.135366667  | 0.3449       | 0.264322222 | 1.201071654 |
| -0.158133333 | 0.056433333  | 0.264288889 | 1.201043903 |
| -0.2345      | -0.1221      | 0.264266667 | 1.201025404 |
| 0.1632       | 0.1536       | 0.263988889 | 1.200794179 |
| 0.290366667  | 0.059833333  | 0.263866667 | 1.200692455 |
| -0.0147      | -0.1052      | 0.263677778 | 1.200535261 |
| 0.117        | 0.051933333  | 0.263666667 | 1.200526015 |
| -0.185833333 | -0.321833333 | 0.263433333 | 1.200331864 |
| -0.099866667 | 0.065166667  | 0.263133333 | 1.200082288 |
| 0.177933333  | 0.2599       | 0.262977778 | 1.199952899 |
| 0.376333333  | 0.231166667  | 0.262977778 | 1.199952899 |
| 0.358566667  | -0.098933333 | 0.262933333 | 1.199915933 |
| 0.017633333  | 0.270333333  | 0.262911111 | 1.199897451 |
| 0.227366667  | 0.110033333  | 0.262855556 | 1.199851246 |
| 0.2778       | 0.041166667  | 0.2627      | 1.199721881 |

|              |              |             |             |
|--------------|--------------|-------------|-------------|
| 0.2512       | 0.2049       | 0.262544444 | 1.199592531 |
| 0.0619       | 0.126233333  | 0.262544444 | 1.199592531 |
| 0.0603       | 0.041833333  | 0.262477778 | 1.199537099 |
| 0.322333333  | 0.2744       | 0.262455556 | 1.199518622 |
| 0.240333333  | 0.232666667  | 0.262444444 | 1.199509384 |
| 0.119333333  | 0.165433333  | 0.262333333 | 1.199417006 |
| 0.001033333  | -0.0029      | 0.262322222 | 1.199407769 |
| 0.091466667  | 0.205166667  | 0.262244444 | 1.199343108 |
| 0.035033333  | 0.286733333  | 0.262233333 | 1.199333872 |
| 0.0799       | 0.3774       | 0.2622      | 1.199306161 |
| 0.229566667  | 0.2182       | 0.262155556 | 1.199269215 |
| -0.057066667 | -0.111266667 | 0.262011111 | 1.199149149 |
| 0.202433333  | 0.267666667  | 0.261922222 | 1.199075268 |
| 0.059733333  | 0.0405       | 0.261855556 | 1.19901986  |
| 0.1403       | 0.170166667  | 0.261622222 | 1.198825953 |
| 0.058833333  | 0.041266667  | 0.261388889 | 1.198632078 |
| 0.069166667  | 0.205933333  | 0.261322222 | 1.19857669  |
| 0.0309       | 0.1192       | 0.261288889 | 1.198548998 |
| -0.058266667 | 0.127733333  | 0.261266667 | 1.198530536 |
| 0.118433333  | -0.055333333 | 0.261033333 | 1.198336708 |
| -0.0687      | -0.073733333 | 0.261022222 | 1.198327479 |
| 0.383166667  | 0.1435       | 0.260688889 | 1.198050639 |
| 0.014566667  | 0.0441       | 0.260677778 | 1.198041412 |
| 0.036366667  | 0.032166667  | 0.260222222 | 1.19766317  |
| 0.1286       | 0.200433333  | 0.260055556 | 1.197524818 |
| -0.0555      | 0.042766667  | 0.260044444 | 1.197515595 |
| 0.1704       | 0.033166667  | 0.259944444 | 1.197432593 |
| 0.093633333  | 0.271866667  | 0.259722222 | 1.197248163 |
| 0.047266667  | 0.095266667  | 0.259711111 | 1.197238942 |
| 0.3172       | 0.493266667  | 0.259688889 | 1.197220501 |
| 0.077833333  | 0.021466667  | 0.259644444 | 1.19718362  |
| 0.2684       | 0.2756       | 0.259477778 | 1.197045323 |
| 0.016466667  | 0.001666667  | 0.259422222 | 1.196999228 |
| 0.108        | 0.176266667  | 0.259388889 | 1.196971572 |
| -0.029533333 | 0.1581       | 0.259333333 | 1.19692548  |
| -0.0038      | 0.086433333  | 0.259322222 | 1.196916262 |
| 0.272933333  | 0.174633333  | 0.259211111 | 1.196824083 |
| -0.037       | -0.0321      | 0.259111111 | 1.196741128 |
| -0.068333333 | -0.043166667 | 0.258888889 | 1.196556805 |
| -0.213366667 | -0.186866667 | 0.258888889 | 1.196556805 |
| -0.0559      | 0.3619       | 0.258811111 | 1.196492299 |
| 0.034033333  | -0.042866667 | 0.258777778 | 1.196464654 |
| 0.2088       | -0.0602      | 0.258766667 | 1.19645544  |
| 0.528133333  | 0.0456       | 0.258522222 | 1.196252734 |
| -0.0712      | 0.114966667  | 0.258477778 | 1.196215882 |
| 0.070433333  | 0.200466667  | 0.2583      | 1.196068486 |
| -0.001       | 0.043233333  | 0.258155556 | 1.19594874  |

|              |              |             |             |
|--------------|--------------|-------------|-------------|
| 0.014766667  | 0.060333333  | 0.2581      | 1.195902688 |
| 0.001566667  | -0.0314      | 0.258066667 | 1.195875057 |
| -0.0252      | 0.035        | 0.257944444 | 1.195773749 |
| 0.118266667  | 0.260633333  | 0.257888889 | 1.195727703 |
| -0.0042      | -0.041       | 0.257666667 | 1.195543536 |
| 0.13         | 0.2105       | 0.257633333 | 1.195515913 |
| 0.157866667  | 0.096333333  | 0.257566667 | 1.19546067  |
| -0.0116      | -0.006266667 | 0.257411111 | 1.195331779 |
| -0.018966667 | -0.0316      | 0.257111111 | 1.195083242 |
| 0.0816       | -0.127833333 | 0.256977778 | 1.194972798 |
| -0.0859      | -0.0042      | 0.256744444 | 1.194779546 |
| 0.009366667  | -0.001233333 | 0.256466667 | 1.194549524 |
| 0.0837       | 0.193966667  | 0.256333333 | 1.194439129 |
| 0.141733333  | -0.022166667 | 0.256088889 | 1.194236765 |
| 0.247933333  | 0.043166667  | 0.256077778 | 1.194227568 |
| 0.043866667  | -0.134166667 | 0.255955556 | 1.1941264   |
| 0.1425       | 0.141133333  | 0.255955556 | 1.1941264   |
| 0.081366667  | 0.1456       | 0.255811111 | 1.194006848 |
| 0.142033333  | 0.156133333  | 0.255766667 | 1.193970065 |
| 0.318866667  | 0.0131       | 0.255688889 | 1.193905699 |
| 0.3777       | 0.3281       | 0.254977778 | 1.193317362 |
| 0.202066667  | 0.210066667  | 0.254822222 | 1.193188702 |
| 0.0002       | -0.000866667 | 0.254522222 | 1.192940611 |
| 0.251766667  | 0.157266667  | 0.2544      | 1.192839552 |
| -0.007433333 | 0.099666667  | 0.254311111 | 1.19276606  |
| 0.092733333  | -0.0126      | 0.254177778 | 1.19265583  |
| 0.088266667  | 0.304633333  | 0.254077778 | 1.192573164 |
| 0.285466667  | 0.156166667  | 0.2539      | 1.192426217 |
| -0.017233333 | -0.111633333 | 0.253688889 | 1.192251741 |
| 0.2662       | 0.2017       | 0.253655556 | 1.192224194 |
| 0.0379       | 0.052066667  | 0.253444444 | 1.192049747 |
| 0.090866667  | -0.166633333 | 0.253377778 | 1.191994664 |
| 0.014933333  | -0.014566667 | 0.253266667 | 1.191902865 |
| 0.184533333  | 0.036533333  | 0.252977778 | 1.191664219 |
| -0.021433333 | 0.0148       | 0.252755556 | 1.191480678 |
| 0.0355       | -0.080833333 | 0.252655556 | 1.191398093 |
| 0.143766667  | -0.010966667 | 0.252522222 | 1.19128799  |
| 0.211766667  | 0.029466667  | 0.252155556 | 1.190985258 |
| 0.239466667  | 0.523133333  | 0.251966667 | 1.190829335 |
| 0.174166667  | 0.1047       | 0.251911111 | 1.190783479 |
| 0.037566667  | 0.046133333  | 0.251777778 | 1.190673433 |
| 0.104166667  | 0.024266667  | 0.251722222 | 1.190627583 |
| 0.2102       | 0.074933333  | 0.251577778 | 1.190508382 |
| 0.077933333  | -0.027866667 | 0.251544444 | 1.190480875 |
| 0.023133333  | -0.116733333 | 0.251533333 | 1.190471707 |
| -0.083366667 | 0.061366667  | 0.251388889 | 1.190352521 |
| 0.093533333  | 0.0951       | 0.251377778 | 1.190343354 |

|              |              |             |             |
|--------------|--------------|-------------|-------------|
| 0.2311       | 0.2227       | 0.251333333 | 1.190306684 |
| 0.116966667  | 0.190433333  | 0.251177778 | 1.190178348 |
| 0.205433333  | 0.221733333  | 0.251144444 | 1.19015085  |
| 0.050333333  | 0.129966667  | 0.251077778 | 1.190095854 |
| 0.2164       | 0.387366667  | 0.251044444 | 1.190068358 |
| -0.070233333 | 0.0266       | 0.250866667 | 1.189921719 |
| 0.0447       | 0.190166667  | 0.250844444 | 1.189903391 |
| -0.1769      | -0.431166667 | 0.250777778 | 1.189848407 |
| -0.130066667 | -0.0834      | 0.250755556 | 1.189830079 |
| 0.0627       | 0.212        | 0.250711111 | 1.189793425 |
| 0.2083       | -0.039866667 | 0.250577778 | 1.18968347  |
| 0.091833333  | 0.123833333  | 0.250566667 | 1.189674308 |
| -0.0419      | -0.004566667 | 0.250066667 | 1.189262069 |
| 0.169133333  | 0.237533333  | 0.249833333 | 1.18906974  |
| 0.213533333  | 0.135233333  | 0.2498      | 1.189042267 |
| 0.154066667  | -0.0652      | 0.2495      | 1.188795039 |
| 0.152333333  | 0.0288       | 0.249311111 | 1.188639403 |
| 0.217833333  | 0.1664       | 0.249255556 | 1.188593631 |
| 0.111466667  | 0.1157       | 0.248911111 | 1.188309887 |
| 0.145233333  | -0.129033333 | 0.2489      | 1.188300735 |
| 0.068733333  | 0.264366667  | 0.248833333 | 1.188245826 |
| -0.027466667 | -0.048966667 | 0.2488      | 1.188218372 |
| -0.058166667 | -0.066433333 | 0.248744444 | 1.188172616 |
| 0.2215       | 0.243933333  | 0.248544444 | 1.188007912 |
| -0.003566667 | 0.145366667  | 0.248522222 | 1.187989613 |
| 0.028        | 0.332533333  | 0.248455556 | 1.187934717 |
| 0.0593       | 0.1397       | 0.248433333 | 1.18791642  |
| 0.114466667  | -0.018866667 | 0.248288889 | 1.18779749  |
| 0.023466667  | 0.021766667  | 0.248244444 | 1.187760898 |
| -0.0159      | 0.099866667  | 0.248244444 | 1.187760898 |
| 0.261333333  | -0.0511      | 0.248244444 | 1.187760898 |
| 0.290733333  | 0.273366667  | 0.248022222 | 1.187577959 |
| 0.122366667  | 0.157933333  | 0.248011111 | 1.187568812 |
| 0.022133333  | 0.068633333  | 0.247855556 | 1.187440772 |
| 0.116666667  | 0.212833333  | 0.247755556 | 1.187358468 |
| 0.305333333  | 0.264466667  | 0.247655556 | 1.187276169 |
| 0.222333333  | 0.0911       | 0.247166667 | 1.186873903 |
| 0.190433333  | 0.091066667  | 0.247066667 | 1.186791638 |
| 0.032633333  | -0.074866667 | 0.247055556 | 1.186782498 |
| -0.013633333 | 0.029366667  | 0.246933333 | 1.18668196  |
| 0.0525       | 0.201766667  | 0.246555556 | 1.186371261 |
| 0.061666667  | 0.058633333  | 0.246444444 | 1.186279895 |
| 0.279666667  | 0.1989       | 0.246411111 | 1.186252486 |
| 0.220566667  | 0.143466667  | 0.2464      | 1.18624335  |
| -0.1699      | 0.173        | 0.246233333 | 1.186106318 |
| 0.3615       | 0.0555       | 0.246222222 | 1.186097183 |
| 0.048133333  | 0.040033333  | 0.246222222 | 1.186097183 |

|              |              |             |             |
|--------------|--------------|-------------|-------------|
| -0.043166667 | -0.1518      | 0.2462      | 1.186078913 |
| 0.1437       | 0.1124       | 0.245855556 | 1.18579577  |
| -0.0302      | 0.097433333  | 0.245822222 | 1.185768373 |
| -0.017666667 | -0.034866667 | 0.245666667 | 1.185640527 |
| 0.145733333  | 0.0773       | 0.245555556 | 1.185549216 |
| 0.1987       | 0.3494       | 0.245522222 | 1.185521825 |
| 0.0351       | -0.023366667 | 0.245455556 | 1.185467043 |
| 0.470333333  | -0.0005      | 0.245366667 | 1.185394005 |
| 0.354633333  | -0.048233333 | 0.245244444 | 1.185293585 |
| 0.1162       | 0.149633333  | 0.2452      | 1.185257071 |
| 0.0279       | -0.039933333 | 0.245177778 | 1.185238814 |
| -0.1144      | -0.0309      | 0.245177778 | 1.185238814 |
| -0.021033333 | 0.040233333  | 0.2451      | 1.185174918 |
| 0.1252       | 0.0536       | 0.2451      | 1.185174918 |
| 0.005633333  | -0.011       | 0.245088889 | 1.18516579  |
| -0.080566667 | 0.016866667  | 0.245011111 | 1.185101898 |
| 0.188966667  | 0.097566667  | 0.244844444 | 1.184964998 |
| -0.1679      | 0.0068       | 0.244833333 | 1.184955872 |
| 0.4165       | 0.135166667  | 0.2448      | 1.184928494 |
| 0.310733333  | 0.303033333  | 0.244611111 | 1.184773364 |
| -0.0639      | -0.0519      | 0.244422222 | 1.184618254 |
| 0.1059       | 0.0828       | 0.244388889 | 1.184590884 |
| 0.030066667  | -0.0707      | 0.2441      | 1.184353702 |
| 0.1482       | 0.0987       | 0.244055556 | 1.184317217 |
| 0.0279       | 0.167266667  | 0.243877778 | 1.184171287 |
| 0.0488       | 0.292233333  | 0.243722222 | 1.184043613 |
| 0.1439       | 0.2284       | 0.243633333 | 1.183970663 |
| -0.053466667 | 0.061633333  | 0.243466667 | 1.183833893 |
| 0.168666667  | 0.347633333  | 0.243355556 | 1.183742722 |
| 0.0585       | -0.1245      | 0.243344444 | 1.183733605 |
| -0.255866667 | 0.126        | 0.243244444 | 1.183651558 |
| -0.1297      | -0.212633333 | 0.243144444 | 1.183569516 |
| 0.166133333  | 0.223033333  | 0.243055556 | 1.183496595 |
| -0.031933333 | -0.0666      | 0.242977778 | 1.183432793 |
| 0.030966667  | -0.0234      | 0.242855556 | 1.183332539 |
| -0.137966667 | 0.131833333  | 0.242844444 | 1.183323426 |
| 0.1332       | 0.077333333  | 0.242811111 | 1.183296085 |
| 0.072633333  | -0.016166667 | 0.242811111 | 1.183296085 |
| 0.293366667  | 0.080666667  | 0.242766667 | 1.183259633 |
| 0.128766667  | -0.040966667 | 0.242766667 | 1.183259633 |
| 0.096466667  | 0.383666667  | 0.242744444 | 1.183241407 |
| 0.071833333  | -0.0804      | 0.242733333 | 1.183232294 |
| 0.172833333  | 0.2104       | 0.242711111 | 1.183214068 |
| -0.066566667 | 0.267133333  | 0.242433333 | 1.182986273 |
| 0.120433333  | 0.139166667  | 0.242322222 | 1.182895167 |
| 0.252466667  | 0.035566667  | 0.242322222 | 1.182895167 |
| 0.078133333  | 0.206666667  | 0.242322222 | 1.182895167 |

|              |              |             |             |
|--------------|--------------|-------------|-------------|
| 0.441466667  | 0.1493       | 0.242       | 1.182631    |
| 0.1682       | 0.034933333  | 0.241822222 | 1.182485278 |
| 0.1365       | -0.0496      | 0.241677778 | 1.182366892 |
| 0.235533333  | -0.065533333 | 0.241677778 | 1.182366892 |
| 0.167        | 0.1452       | 0.2416      | 1.182303151 |
| -0.1079      | 0.1413       | 0.241455556 | 1.182184783 |
| 0.1092       | 0.240833333  | 0.241266667 | 1.182030012 |
| 0.1735       | 0.158766667  | 0.241244444 | 1.182011805 |
| -0.0087      | -0.067466667 | 0.240966667 | 1.181784242 |
| 0.0362       | 0.1461       | 0.240922222 | 1.181747835 |
| 0.196766667  | 0.1072       | 0.240833333 | 1.181675027 |
| 0.045866667  | -0.0932      | 0.240666667 | 1.181538522 |
| 0.415033333  | 0.4373       | 0.240411111 | 1.181329246 |
| 0.3363       | 0.363966667  | 0.240288889 | 1.18122917  |
| -0.026266667 | 0.0422       | 0.240222222 | 1.181174587 |
| 0.198833333  | 0.029466667  | 0.240222222 | 1.181174587 |
| 0.058533333  | -0.043033333 | 0.240177778 | 1.1811382   |
| 0.309566667  | 0.1384       | 0.240144444 | 1.18111091  |
| 0.186833333  | -0.006566667 | 0.240088889 | 1.181065428 |
| 0.111166667  | 0.205533333  | 0.240055556 | 1.18103814  |
| 0.008966667  | 0.327733333  | 0.239955556 | 1.18095628  |
| -0.023566667 | 0.129166667  | 0.239933333 | 1.180938089 |
| 0.060566667  | 0.2021       | 0.239622222 | 1.180683452 |
| 0.153566667  | 0.173466667  | 0.239477778 | 1.180565247 |
| 0.3048       | 0.294533333  | 0.2393      | 1.180419779 |
| 0.1448       | 0.055566667  | 0.239288889 | 1.180410688 |
| 0.004866667  | -0.0077      | 0.239277778 | 1.180401597 |
| 0.321833333  | -0.364333333 | 0.239211111 | 1.180347052 |
| 0.326566667  | 0.3068       | 0.239211111 | 1.180347052 |
| 0.027733333  | 0.0824       | 0.239155556 | 1.1803016   |
| -0.148766667 | -0.099766667 | 0.2391      | 1.18025615  |
| -0.028166667 | 0.025966667  | 0.239022222 | 1.180192522 |
| 0.055566667  | 0.0997       | 0.238877778 | 1.180074366 |
| -0.0328      | 0.217033333  | 0.238822222 | 1.180028924 |
| 0.256733333  | 0.102133333  | 0.238722222 | 1.179947133 |
| 0.1177       | 0.162233333  | 0.2387      | 1.179928958 |
| -0.035866667 | 0.0751       | 0.238588889 | 1.179838088 |
| 0.226633333  | 0.360633333  | 0.238577778 | 1.179829002 |
| 0.392        | 0.063866667  | 0.238466667 | 1.179738139 |
| 0.134166667  | 0.111866667  | 0.238366667 | 1.179656369 |
| 0.039566667  | 0.1189       | 0.238366667 | 1.179656369 |
| 0.123566667  | 0.0465       | 0.2383      | 1.179601858 |
| 0.145066667  | -0.020966667 | 0.238211111 | 1.179529181 |
| 0.187666667  | 0.129833333  | 0.238177778 | 1.179501929 |
| 0.2401       | 0.134133333  | 0.238077778 | 1.179420175 |
| 0.184033333  | 0.2465       | 0.238       | 1.179356592 |
| 0.264333333  | 0.0299       | 0.237988889 | 1.179347509 |



|              |              |             |             |
|--------------|--------------|-------------|-------------|
| 0.4412       | -0.083533333 | 0.237777778 | 1.179174947 |
| 0.036233333  | 0.205233333  | 0.237766667 | 1.179165865 |
| 0.126533333  | 0.227866667  | 0.237655556 | 1.179075054 |
| 0.143566667  | 0.137033333  | 0.237577778 | 1.17901149  |
| 0.27         | 0.2989       | 0.237566667 | 1.179002409 |
| -0.009066667 | -0.0173      | 0.237511111 | 1.178957009 |
| 0.069833333  | 0.0882       | 0.237377778 | 1.178848055 |
| 0.518133333  | -0.0284      | 0.237366667 | 1.178838976 |
| 0.088333333  | 0.078033333  | 0.237366667 | 1.178838976 |
| 0.093733333  | 0.172433333  | 0.237188889 | 1.178693721 |
| 0.095233333  | 0.181333333  | 0.237077778 | 1.178602946 |
| 0.394833333  | -0.181066667 | 0.237       | 1.178539408 |
| 0.370133333  | 0.033066667  | 0.236988889 | 1.178530331 |
| 0.0631       | -0.1453      | 0.236944444 | 1.178494025 |
| -0.0626      | -0.0799      | 0.236511111 | 1.178140102 |
| -0.151766667 | -0.019733333 | 0.236455556 | 1.178094734 |
| 0.232766667  | 0.172033333  | 0.236366667 | 1.178022151 |
| 0.338833333  | 0.160166667  | 0.236355556 | 1.178013078 |
| 0.109166667  | 0.143466667  | 0.236288889 | 1.177958643 |
| 0.227766667  | 0.0721       | 0.236055556 | 1.177768142 |
| 0.1955       | 0.147433333  | 0.235844444 | 1.177595811 |
| 0.2507       | 0.2967       | 0.235777778 | 1.177541396 |
| 0.308433333  | 0.2453       | 0.235511111 | 1.17732376  |
| 0.186233333  | -0.0594      | 0.235244444 | 1.177106164 |
| 0.020066667  | -0.0549      | 0.235244444 | 1.177106164 |
| -0.126466667 | -0.030933333 | 0.235144444 | 1.177024577 |
| 0.240266667  | 0.059        | 0.234966667 | 1.176879545 |
| 0.148733333  | -0.005666667 | 0.234911111 | 1.176834227 |
| 0.189366667  | 0.178433333  | 0.2349      | 1.176825163 |
| 0.097933333  | 0.1565       | 0.234711111 | 1.176671094 |
| 0.001566667  | -0.096066667 | 0.234688889 | 1.17665297  |
| -0.160866667 | -0.0008      | 0.234522222 | 1.176517045 |
| 0.287633333  | 0.365366667  | 0.2345      | 1.176498923 |
| 0.0846       | 0.1783       | 0.234422222 | 1.176435498 |
| -0.005833333 | 0.099866667  | 0.234355556 | 1.176381136 |
| 0.052333333  | 0.006833333  | 0.234188889 | 1.176245243 |
| -0.087866667 | 0.082266667  | 0.2341      | 1.176172774 |
| 0.0211       | -0.045533333 | 0.233788889 | 1.175919164 |
| 0.214533333  | 0.121333333  | 0.233611111 | 1.175774269 |
| -0.020133333 | -0.046       | 0.233422222 | 1.175620338 |
| 0.1546       | 0.064233333  | 0.233355556 | 1.175566014 |
| 0.048966667  | 0.249066667  | 0.233211111 | 1.17544832  |
| 0.2117       | 0.168966667  | 0.233188889 | 1.175430215 |
| -0.0027      | 0.115333333  | 0.233111111 | 1.175366847 |
| 0.342066667  | 0.382833333  | 0.233011111 | 1.17528538  |
| -0.0316      | 0.116233333  | 0.232844444 | 1.175149614 |
| -0.0635      | 0.237933333  | 0.2328      | 1.175113412 |

|              |              |             |             |
|--------------|--------------|-------------|-------------|
| 0.151833333  | 0.109666667  | 0.232788889 | 1.175104362 |
| 0.2109       | 0.1623       | 0.232755556 | 1.175077211 |
| 0.3202       | 0.2667       | 0.232677778 | 1.175013863 |
| -0.152133333 | 0.174966667  | 0.232611111 | 1.174959567 |
| 0.0563       | -0.031066667 | 0.2325      | 1.174869079 |
| 0.0003       | -0.138166667 | 0.232422222 | 1.174805742 |
| -0.0585      | 0.001933333  | 0.232355556 | 1.174751456 |
| 0.0029       | -0.066033333 | 0.232288889 | 1.174697172 |
| 0.126166667  | 0.089166667  | 0.232222222 | 1.174642891 |
| 0.135333333  | -0.055866667 | 0.231811111 | 1.174308212 |
| 0.346866667  | 0.0981       | 0.231577778 | 1.174118301 |
| 0.0115       | 0.034566667  | 0.231511111 | 1.174064046 |
| -0.0263      | 0.013566667  | 0.231077778 | 1.173711453 |
| 0.016466667  | -0.141       | 0.231       | 1.173648178 |
| -0.025733333 | 0.071833333  | 0.230933333 | 1.173593945 |
| 0.061933333  | 0.0661       | 0.230755556 | 1.173449337 |
| 0.1535       | 0.030766667  | 0.2307      | 1.17340415  |
| 0.1219       | 0.063433333  | 0.230622222 | 1.173340892 |
| 0.026466667  | 0.192266667  | 0.230522222 | 1.173259565 |
| -0.2923      | 0.446566667  | 0.2304      | 1.173160173 |
| -0.140266667 | -0.2138      | 0.230122222 | 1.172934314 |
| 0.069633333  | 0.056633333  | 0.229844444 | 1.172708498 |
| 0.093333333  | 0.1294       | 0.229822222 | 1.172690434 |
| -0.013233333 | -0.091433333 | 0.229744444 | 1.172627214 |
| 0.077133333  | 0.138333333  | 0.229688889 | 1.17258206  |
| -0.0184      | 0.194266667  | 0.229555556 | 1.172473695 |
| 0.2788       | 0.395966667  | 0.229444444 | 1.172383399 |
| 0.0138       | 0.3719       | 0.229433333 | 1.17237437  |
| 0.0635       | 0.018433333  | 0.229388889 | 1.172338253 |
| 0.008566667  | -0.019866667 | 0.229122222 | 1.172121579 |
| 0.171        | 0.218966667  | 0.228866667 | 1.171913971 |
| 0.1752       | 0.195766667  | 0.228866667 | 1.171913971 |
| 0.1941       | 0.0912       | 0.228866667 | 1.171913971 |
| 0.136766667  | 0.0318       | 0.228677778 | 1.171760545 |
| 0.102933333  | 0.167266667  | 0.228488889 | 1.171607139 |
| 0.058966667  | 0.2038       | 0.228355556 | 1.171498864 |
| 0.093433333  | 0.046833333  | 0.228277778 | 1.171435709 |
| 0.0118       | 0.290133333  | 0.228155556 | 1.171336471 |
| 0.115366667  | 0.1233       | 0.228088889 | 1.171282345 |
| -0.080266667 | -0.243233333 | 0.227944444 | 1.171165081 |
| -0.033666667 | 0.055333333  | 0.2277      | 1.17096666  |
| 0.069333333  | 0.0875       | 0.227688889 | 1.170957642 |
| 0.151333333  | 0.260366667  | 0.227633333 | 1.170912551 |
| -0.082066667 | 0.046866667  | 0.227622222 | 1.170903533 |
| -0.0379      | -0.0571      | 0.227366667 | 1.170696141 |
| -0.011833333 | 0.1703       | 0.227244444 | 1.170596966 |
| 0.035833333  | 0.137133333  | 0.227211111 | 1.17056992  |

|              |              |             |             |
|--------------|--------------|-------------|-------------|
| 0.184266667  | 0.082        | 0.227033333 | 1.170425684 |
| 0.2664       | 0.1416       | 0.226977778 | 1.170380614 |
| 0.287933333  | -0.013033333 | 0.226877778 | 1.170299492 |
| 0.388266667  | 0.3009       | 0.226844444 | 1.170272453 |
| 0.051666667  | 0.334633333  | 0.226611111 | 1.170083195 |
| 0.129533333  | -0.0118      | 0.2266      | 1.170074183 |
| 0.027866667  | -0.0013      | 0.226566667 | 1.170047149 |
| 0.066233333  | 0.1201       | 0.226511111 | 1.170002093 |
| 0.0151       | -0.024166667 | 0.226355556 | 1.169875947 |
| -0.018266667 | 0.354233333  | 0.226333333 | 1.169857927 |
| 0.0764       | 0.109566667  | 0.226244444 | 1.169785851 |
| 0.066        | -0.126666667 | 0.226033333 | 1.169614688 |
| 0.2054       | 0.086666667  | 0.226033333 | 1.169614688 |
| 0.335166667  | -0.023333333 | 0.225877778 | 1.169488583 |
| -0.075       | 0.304866667  | 0.225833333 | 1.169452556 |
| 0.146266667  | 0.161        | 0.225722222 | 1.169362492 |
| 0.043566667  | -0.088333333 | 0.2257      | 1.16934448  |
| 0.200733333  | 0.1903       | 0.225633333 | 1.169290446 |
| 0.200133333  | 0.419133333  | 0.225611111 | 1.169272436 |
| 0.049666667  | 0.112233333  | 0.225588889 | 1.169254425 |
| 0.125366667  | 0.060833333  | 0.225433333 | 1.16912836  |
| 0.088533333  | 0.103333333  | 0.224944444 | 1.168732242 |
| 0.014433333  | -0.0104      | 0.224777778 | 1.168597233 |
| -0.120233333 | -0.0253      | 0.224511111 | 1.16838125  |
| 0.0088       | 0.2798       | 0.224444444 | 1.16832726  |
| 0.0029       | 0.1879       | 0.224422222 | 1.168309264 |
| 0.0241       | 0.1176       | 0.223877778 | 1.167868451 |
| 0.1068       | 0.092        | 0.223866667 | 1.167859456 |
| 0.176366667  | 0.262266667  | 0.223855556 | 1.167850462 |
| 0.1472       | 0.132766667  | 0.223822222 | 1.167823479 |
| 0.0706       | 0.1693       | 0.223477778 | 1.167544694 |
| -0.023       | 0.103633333  | 0.223155556 | 1.167283955 |
| 0.085566667  | 0.009166667  | 0.223133333 | 1.167265975 |
| 0.025633333  | 0.1703       | 0.223111111 | 1.167247996 |
| 0.0097       | 0.036433333  | 0.223011111 | 1.167167091 |
| 0.2063       | 0.237266667  | 0.223       | 1.167158102 |
| 0.2617       | 0.226333333  | 0.222955556 | 1.167122146 |
| 0.0683       | 0.227466667  | 0.222888889 | 1.167068215 |
| 0.3067       | -0.102333333 | 0.222877778 | 1.167059227 |
| 0.169866667  | 0.110266667  | 0.222822222 | 1.167014286 |
| 0.048066667  | 0.051766667  | 0.222588889 | 1.166825555 |
| -0.026266667 | -0.166266667 | 0.2225      | 1.166753666 |
| -0.1423      | 0.102866667  | 0.222488889 | 1.16674468  |
| 0.0214       | -0.075133333 | 0.2224      | 1.166672795 |
| 0.301666667  | 0.242        | 0.222166667 | 1.16648412  |
| 0.01         | -0.049633333 | 0.222133333 | 1.166457168 |
| 0.5149       | -0.079033333 | 0.221866667 | 1.166241581 |

|              |              |             |             |
|--------------|--------------|-------------|-------------|
| 0.1188       | 0.1714       | 0.221577778 | 1.166008073 |
| 0.0532       | 0.0432       | 0.221488889 | 1.165936234 |
| 0.234366667  | 0.5161       | 0.221422222 | 1.165882358 |
| 0.245166667  | 0.3109       | 0.221411111 | 1.165873379 |
| 0.331666667  | 0.3752       | 0.221377778 | 1.165846442 |
| 0.0562       | 0.1482       | 0.221344444 | 1.165819505 |
| 0.017266667  | 0.1765       | 0.2213      | 1.165783591 |
| 0.1902       | 0.153933333  | 0.221188889 | 1.16569381  |
| 0.03         | 0.1655       | 0.220966667 | 1.165514269 |
| 0.121233333  | 0.034533333  | 0.220944444 | 1.165496316 |
| -0.048033333 | -0.386333333 | 0.220866667 | 1.165433484 |
| 0.102466667  | 0.0575       | 0.220866667 | 1.165433484 |
| 0.071133333  | 0.052866667  | 0.220822222 | 1.165397582 |
| 0.166733333  | 0.013233333  | 0.220822222 | 1.165397582 |
| 0.189766667  | 0.1075       | 0.220766667 | 1.165352705 |
| 0.212533333  | 0.1052       | 0.220766667 | 1.165352705 |
| 0.097566667  | -0.0043      | 0.220644444 | 1.165253983 |
| 0.125133333  | 0.142233333  | 0.220333333 | 1.165002728 |
| 0.079433333  | 0.0491       | 0.220311111 | 1.164984783 |
| 0.115466667  | 0.169533333  | 0.220311111 | 1.164984783 |
| -0.012       | -0.112733333 | 0.2202      | 1.164895064 |
| 0.0196       | -0.169866667 | 0.220177778 | 1.164877121 |
| 0.115933333  | 0.1351       | 0.220055556 | 1.164778439 |
| 0.1408       | 0.117133333  | 0.219877778 | 1.164634917 |
| 0.1842       | 0.1806       | 0.219844444 | 1.164608008 |
| 0.188133333  | 0.147466667  | 0.219744444 | 1.164527287 |
| -0.011466667 | 0.049066667  | 0.219733333 | 1.164518318 |
| -0.033366667 | -0.069066667 | 0.219366667 | 1.164222389 |
| 0.0968       | 0.0147       | 0.219344444 | 1.164204456 |
| 0.034766667  | -0.195666667 | 0.219311111 | 1.164177557 |
| -0.031733333 | 0.030233333  | 0.219233333 | 1.164114797 |
| -0.143733333 | 0.033733333  | 0.2191      | 1.164007214 |
| 0.2814       | 0.187866667  | 0.219066667 | 1.16398032  |
| 0.0114       | 0.237366667  | 0.218911111 | 1.163854824 |
| 0.1807       | 0.167833333  | 0.218722222 | 1.163702453 |
| -0.011533333 | -0.0258      | 0.218522222 | 1.16354114  |
| 0.052        | 0.084266667  | 0.2185      | 1.163523218 |
| 0.1853       | 0.391266667  | 0.218477778 | 1.163505296 |
| 0.095833333  | 0.1507       | 0.218433333 | 1.163469453 |
| -0.085066667 | -0.0174      | 0.218433333 | 1.163469453 |
| 0.3403       | 0.236966667  | 0.218388889 | 1.163433611 |
| 0.0558       | 0.0524       | 0.218344444 | 1.16339777  |
| 0.439833333  | 0.207166667  | 0.2183      | 1.163361931 |
| -0.092266667 | 0.0682       | 0.217988889 | 1.163111084 |
| 0.047233333  | 0.0274       | 0.217755556 | 1.162922984 |
| -0.088333333 | -0.068633333 | 0.217722222 | 1.162896115 |
| 0.155433333  | -0.1064      | 0.217677778 | 1.162860291 |

|              |              |             |             |
|--------------|--------------|-------------|-------------|
| -0.0006      | -0.207666667 | 0.217611111 | 1.162806556 |
| 0.2292       | 0.274533333  | 0.217577778 | 1.16277969  |
| 0.095266667  | -0.050866667 | 0.217277778 | 1.162537922 |
| 0.078233333  | -0.038233333 | 0.217188889 | 1.162466297 |
| 0.127666667  | 0.1254       | 0.217011111 | 1.162323059 |
| 0.132033333  | 0.1549       | 0.217       | 1.162314108 |
| 0.324266667  | 0.148966667  | 0.216944444 | 1.16226935  |
| -0.0511      | 0.004266667  | 0.216888889 | 1.162224594 |
| 0.003533333  | 0.012266667  | 0.216633333 | 1.162018738 |
| 0.2382       | 0.107933333  | 0.2165      | 1.16191135  |
| -0.029333333 | -0.005366667 | 0.216222222 | 1.161687656 |
| 0.345633333  | 0.263433333  | 0.215977778 | 1.161490841 |
| -0.033933333 | 0.148833333  | 0.215944444 | 1.161464005 |
| 0.154833333  | 0.045266667  | 0.2159      | 1.161428225 |
| 0.0303       | 0.323        | 0.215877778 | 1.161410335 |
| -0.009533333 | -0.056733333 | 0.215866667 | 1.161401391 |
| -0.1642      | 0.017466667  | 0.215677778 | 1.161249341 |
| 0.195266667  | 0.095933333  | 0.215655556 | 1.161231454 |
| 0.0432       | -0.083733333 | 0.215488889 | 1.161097311 |
| 0.085466667  | 0.159166667  | 0.215466667 | 1.161079426 |
| 0.1611       | 0.150633333  | 0.215466667 | 1.161079426 |
| 0.036933333  | 0.172666667  | 0.215366667 | 1.160998949 |
| 0.2299       | -0.0021      | 0.215344444 | 1.160981066 |
| 0.0077       | -0.0065      | 0.215133333 | 1.160811191 |
| 0.140633333  | 0.0735       | 0.214877778 | 1.160605586 |
| -0.055866667 | 0.225966667  | 0.214866667 | 1.160596648 |
| -0.065866667 | 0.019133333  | 0.214777778 | 1.160525142 |
| -0.098066667 | -0.054       | 0.2147      | 1.160462578 |
| -0.0077      | -0.045233333 | 0.214666667 | 1.160435766 |
| -0.1094      | 0.008266667  | 0.214655556 | 1.160426829 |
| 0.292866667  | 0.1907       | 0.214644444 | 1.160417891 |
| 0.017133333  | -0.030433333 | 0.214377778 | 1.16020342  |
| 0.172766667  | 0.3021       | 0.214211111 | 1.160069396 |
| -0.034833333 | -0.0652      | 0.214133333 | 1.160006857 |
| 0.2265       | 0.103566667  | 0.214133333 | 1.160006857 |
| 0.174933333  | 0.0808       | 0.214033333 | 1.159926454 |
| 0.183766667  | 0.095133333  | 0.213944444 | 1.15985499  |
| 0.167        | 0.219066667  | 0.2139      | 1.159819259 |
| 0.0567       | -0.079533333 | 0.2139      | 1.159819259 |
| 0.552833333  | 0.9758       | 0.213855556 | 1.15978353  |
| -0.005666667 | 0.118333333  | 0.213788889 | 1.159729938 |
| 0.249        | 0.161933333  | 0.213677778 | 1.159640623 |
| 0.3288       | 0.1736       | 0.2136      | 1.159578107 |
| -0.1119      | 0.041666667  | 0.213422222 | 1.159435225 |
| 0.076633333  | 0.1697       | 0.213411111 | 1.159426296 |
| 0.265266667  | 0.254366667  | 0.2134      | 1.159417366 |
| 0.1939       | 0.104        | 0.213344444 | 1.15937272  |

|              |              |             |             |
|--------------|--------------|-------------|-------------|
| 0.082166667  | 0.1622       | 0.213322222 | 1.159354862 |
| 0.083166667  | 0.057966667  | 0.213244444 | 1.159292361 |
| 0.067666667  | 0.1364       | 0.2132      | 1.159256648 |
| -0.017       | -0.0254      | 0.213122222 | 1.159194152 |
| 0.109866667  | 0.2475       | 0.2131      | 1.159176297 |
| 0.348533333  | -0.057366667 | 0.2131      | 1.159176297 |
| 0.330766667  | 0.128833333  | 0.212855556 | 1.158979908 |
| -0.0197      | 0.002533333  | 0.2128      | 1.158935278 |
| -0.0152      | 0.075133333  | 0.212788889 | 1.158926353 |
| 0.018033333  | 0.035533333  | 0.212677778 | 1.1588371   |
| 0.004966667  | 0.089633333  | 0.212655556 | 1.15881925  |
| 0.082333333  | 0.002733333  | 0.212622222 | 1.158792476 |
| 0.035633333  | 0.080633333  | 0.212444444 | 1.158649691 |
| 0.052666667  | -0.0239      | 0.212411111 | 1.158622921 |
| 0.1682       | 0.199        | 0.212233333 | 1.158480157 |
| 0.016633333  | 0.273466667  | 0.2122      | 1.158453391 |
| 0.110233333  | -0.069633333 | 0.2122      | 1.158453391 |
| -0.0165      | -0.042233333 | 0.212177778 | 1.158435547 |
| 0.431533333  | -0.0525      | 0.212144444 | 1.158408782 |
| 0.0465       | -0.038166667 | 0.212111111 | 1.158382017 |
| 0.119833333  | 0.112366667  | 0.212066667 | 1.158346332 |
| 0.482966667  | 0.2039       | 0.211977778 | 1.158274965 |
| 0.0842       | 0.041233333  | 0.211855556 | 1.158176842 |
| 0.053866667  | -0.068       | 0.211622222 | 1.15798954  |
| 0.001366667  | 0.1067       | 0.211444444 | 1.157846855 |
| 0.013133333  | -0.1586      | 0.211266667 | 1.157704186 |
| 0.001566667  | -0.007533333 | 0.211155556 | 1.157615028 |
| -0.062733333 | -0.105366667 | 0.210922222 | 1.157427817 |
| 0.063366667  | 0.3519       | 0.2109      | 1.157409989 |
| 0.2718       | 0.197566667  | 0.210766667 | 1.157303026 |
| 0.0582       | 0.175666667  | 0.210711111 | 1.157258461 |
| -0.077233333 | -0.0589      | 0.210688889 | 1.157240636 |
| 0.014433333  | 0.0343       | 0.210688889 | 1.157240636 |
| -0.048666667 | 0.023733333  | 0.210633333 | 1.157196074 |
| 0.119433333  | 0.200533333  | 0.2106      | 1.157169337 |
| -0.0089      | 0.221166667  | 0.210566667 | 1.157142601 |
| 0.272833333  | 0.285266667  | 0.210555556 | 1.157133689 |
| 0.751633333  | 0.623066667  | 0.210488889 | 1.15708022  |
| 0.0812       | -0.0211      | 0.2104      | 1.15700893  |
| 0.042766667  | 0.1253       | 0.210311111 | 1.156937646 |
| 0.1685       | 0.1785       | 0.2103      | 1.156928735 |
| -0.032633333 | 0.0777       | 0.210233333 | 1.156875275 |
| 0.190633333  | 0.145933333  | 0.210177778 | 1.156830727 |
| -0.0456      | 0.0664       | 0.210077778 | 1.156750544 |
| -0.0957      | 0.055333333  | 0.209877778 | 1.156590196 |
| 0.0287       | 0.1101       | 0.209844444 | 1.156563473 |
| 0.137066667  | 0.126266667  | 0.209833333 | 1.156554566 |

|              |              |             |             |
|--------------|--------------|-------------|-------------|
| 0.442333333  | 0.4601       | 0.209788889 | 1.156518937 |
| 0.095933333  | 0.127833333  | 0.209711111 | 1.156456589 |
| 0.090866667  | 0.0296       | 0.209688889 | 1.156438776 |
| 0.102166667  | 0.132233333  | 0.209688889 | 1.156438776 |
| 0.1778       | 0.137066667  | 0.209644444 | 1.156403151 |
| -0.004366667 | 0.219733333  | 0.209588889 | 1.15635862  |
| -0.0017      | 0.032766667  | 0.209566667 | 1.156340809 |
| 0.0414       | 0.2748       | 0.209544444 | 1.156322998 |
| 0.262066667  | 0.094266667  | 0.209533333 | 1.156314092 |
| 0.120133333  | 0.058633333  | 0.209388889 | 1.156198326 |
| 0.246366667  | 0.0336       | 0.209244444 | 1.156082572 |
| 0.020966667  | 0.173733333  | 0.209177778 | 1.156029151 |
| -0.0225      | 0.249066667  | 0.209122222 | 1.155984635 |
| 0.402266667  | 0.074733333  | 0.209066667 | 1.155940121 |
| -0.0066      | 0.1247       | 0.209011111 | 1.155895609 |
| -0.017133333 | 0.043233333  | 0.208866667 | 1.155779885 |
| 0.094466667  | -0.1466      | 0.208688889 | 1.155637471 |
| 0.214866667  | 0.248166667  | 0.208677778 | 1.155628571 |
| -0.0095      | -0.101666667 | 0.208655556 | 1.155610771 |
| 0.050566667  | -0.033233333 | 0.208588889 | 1.155557371 |
| -0.009533333 | -0.048233333 | 0.208555556 | 1.155530673 |
| 0.1089       | 0.090366667  | 0.208433333 | 1.155432783 |
| 0.129133333  | 0.1403       | 0.208333333 | 1.155352697 |
| 0.033833333  | 0.167066667  | 0.208233333 | 1.155272617 |
| 0.045533333  | 0.1105       | 0.207977778 | 1.155067993 |
| 0.022366667  | 0.1175       | 0.207833333 | 1.154952352 |
| 0.0307       | 0.096266667  | 0.207688889 | 1.154836722 |
| 0.190266667  | 0.156733333  | 0.207566667 | 1.154738891 |
| 0.0581       | 0.0428       | 0.2075      | 1.154685532 |
| 0.150233333  | 0.1885       | 0.207488889 | 1.154676639 |
| 0.1046       | 0.1148       | 0.207455556 | 1.15464996  |
| -0.012133333 | -0.0318      | 0.207266667 | 1.154498794 |
| 0.0023       | -0.269666667 | 0.207155556 | 1.154409883 |
| -0.062766667 | 0.263633333  | 0.207044444 | 1.154320978 |
| 0.141166667  | 0.096133333  | 0.206844444 | 1.154160966 |
| 0.158066667  | 0.310066667  | 0.2066      | 1.153965426 |
| 0.215366667  | 0.155333333  | 0.206366667 | 1.153778805 |
| 0.2044       | 0.0601       | 0.206355556 | 1.153769919 |
| -0.032166667 | 0.135566667  | 0.206322222 | 1.153743262 |
| 0.239033333  | 0.046366667  | 0.206088889 | 1.153556677 |
| 0.155        | 0.349833333  | 0.206044444 | 1.153521141 |
| 0.066933333  | 0.063366667  | 0.206011111 | 1.153494489 |
| 0.1018       | 0.208833333  | 0.205988889 | 1.153476721 |
| 0.3491       | 0.1095       | 0.205755556 | 1.15329018  |
| 0.036933333  | 0.004733333  | 0.205644444 | 1.153201361 |
| 0.1729       | 0.104666667  | 0.205555556 | 1.153130311 |
| 0.252933333  | 0.052866667  | 0.205533333 | 1.153112549 |

|              |              |             |             |
|--------------|--------------|-------------|-------------|
| 0.1497       | 0.237        | 0.205311111 | 1.152934946 |
| 0.017633333  | -0.004733333 | 0.2053      | 1.152926066 |
| 0.2437       | 0.1173       | 0.2053      | 1.152926066 |
| 0.2347       | 0.046966667  | 0.2053      | 1.152926066 |
| 0.178666667  | 0.1544       | 0.205244444 | 1.15288167  |
| 0.091866667  | 0.14         | 0.205133333 | 1.152792883 |
| 0.0897       | 0.0703       | 0.204922222 | 1.152624205 |
| 0.219666667  | 0.1015       | 0.204755556 | 1.152491057 |
| 0.041833333  | 0.162966667  | 0.204733333 | 1.152473305 |
| -0.1291      | -0.033333333 | 0.2047      | 1.152446677 |
| -0.0104      | -0.187466667 | 0.204666667 | 1.15242005  |
| -0.106266667 | -0.159933333 | 0.204633333 | 1.152393424 |
| 0.000933333  | 0.079033333  | 0.204633333 | 1.152393424 |
| 0.082066667  | -0.0217      | 0.204166667 | 1.152020721 |
| 0.095433333  | -0.1265      | 0.2039      | 1.151807802 |
| 0.1569       | 0.029        | 0.203811111 | 1.151736838 |
| 0.327433333  | 0.121        | 0.203644444 | 1.151603792 |
| -0.122466667 | 0.0695       | 0.203511111 | 1.151497366 |
| 0.087066667  | 0.075566667  | 0.203466667 | 1.151461893 |
| 0.202133333  | 0.158733333  | 0.203455556 | 1.151453025 |
| 0.1763       | 0.115133333  | 0.203333333 | 1.15135548  |
| 0.427433333  | -0.026066667 | 0.203311111 | 1.151337746 |
| 0.154266667  | 0.072233333  | 0.203233333 | 1.151275677 |
| -0.035733333 | -0.097333333 | 0.202977778 | 1.151071761 |
| -0.034266667 | 0.201333333  | 0.202888889 | 1.151000842 |
| 0.163633333  | 0.103366667  | 0.202877778 | 1.150991977 |
| 0.174366667  | 0.112233333  | 0.202766667 | 1.150903336 |
| 0.0627       | -0.1112      | 0.202733333 | 1.150876744 |
| 0.075933333  | -0.051333333 | 0.202655556 | 1.150814701 |
| -0.0327      | 0.008366667  | 0.202533333 | 1.15071721  |
| 0.266166667  | 0.214166667  | 0.2025      | 1.150690623 |
| 0.071433333  | 0.1589       | 0.202233333 | 1.15047795  |
| 0.283433333  | 0.135766667  | 0.202177778 | 1.150433648 |
| -0.0697      | -0.052766667 | 0.201911111 | 1.150221023 |
| 0.276766667  | 0.156533333  | 0.201866667 | 1.150185589 |
| 0.244666667  | 0.058966667  | 0.201833333 | 1.150159014 |
| 0.209166667  | 0.130033333  | 0.201833333 | 1.150159014 |
| 0.478833333  | 0.1012       | 0.201677778 | 1.150035007 |
| 0.122166667  | 0.2341       | 0.201577778 | 1.149955296 |
| 0.0118       | 0.124933333  | 0.2015      | 1.149893302 |
| 0.266033333  | 0.139833333  | 0.201455556 | 1.149857878 |
| 0.146166667  | 0.179433333  | 0.201411111 | 1.149822455 |
| -0.010066667 | 0.026933333  | 0.201388889 | 1.149804744 |
| 0.2284       | 0.357066667  | 0.201322222 | 1.149751613 |
| 0.296266667  | 0.117666667  | 0.201311111 | 1.149742758 |
| 0.126566667  | 0.1138       | 0.201122222 | 1.149592235 |
| 0.082433333  | 0.157633333  | 0.201       | 1.149494848 |



|              |              |             |             |
|--------------|--------------|-------------|-------------|
| 0.212566667  | 0.1558       | 0.200722222 | 1.149273545 |
| -0.019066667 | 0.087033333  | 0.200588889 | 1.149167334 |
| 0.0714       | 0.170433333  | 0.200544444 | 1.149131933 |
| 0.0228       | -0.031566667 | 0.200533333 | 1.149123083 |
| -0.1666      | 0.0094       | 0.200455556 | 1.149061133 |
| 0.087966667  | 0.232333333  | 0.200422222 | 1.149034585 |
| 0.162866667  | 0.204066667  | 0.200311111 | 1.148946094 |
| 0.099066667  | 0.157266667  | 0.200144444 | 1.14881337  |
| 0.231366667  | 0.151533333  | 0.200055556 | 1.14874259  |
| 0.197533333  | 0.140466667  | 0.200033333 | 1.148724896 |
| -0.0375      | -0.065433333 | 0.2         | 1.148698355 |
| 0.1528       | 0.076566667  | 0.199911111 | 1.148627582 |
| 0.225233333  | 0.169733333  | 0.199833333 | 1.14856566  |
| 0.059033333  | -0.0794      | 0.199766667 | 1.148512586 |
| 0.0305       | -0.0942      | 0.199666667 | 1.14843298  |
| 0.062066667  | 0.270533333  | 0.199644444 | 1.14841529  |
| 0.178466667  | 0.1621       | 0.199388889 | 1.148211881 |
| 0.066866667  | -0.013433333 | 0.199388889 | 1.148211881 |
| 0.2649       | 0.216166667  | 0.199388889 | 1.148211881 |
| 0.034566667  | 0.094633333  | 0.199166667 | 1.148035032 |
| -0.044266667 | 0.1105       | 0.199155556 | 1.148026191 |
| 0.396033333  | -0.1123      | 0.199022222 | 1.147920095 |
| -0.0093      | -0.028466667 | 0.198977778 | 1.147884733 |
| -0.019066667 | 0.0895       | 0.198855556 | 1.14778749  |
| 0.3036       | 0.107066667  | 0.198822222 | 1.147760971 |
| -0.018133333 | 0.241233333  | 0.198644444 | 1.147619545 |
| 0.2081       | 0.056866667  | 0.198577778 | 1.147566515 |
| 0.0847       | 0.098933333  | 0.198555556 | 1.147548839 |
| -0.059       | -0.0015      | 0.198488889 | 1.147495812 |
| 0.097433333  | 0.058766667  | 0.198433333 | 1.147451625 |
| -0.046766667 | -0.049833333 | 0.198311111 | 1.14735442  |
| 0.264666667  | 0.288633333  | 0.198244444 | 1.147301402 |
| 0.485666667  | 0.014933333  | 0.198033333 | 1.147133528 |
| 0.290466667  | 0.122566667  | 0.198022222 | 1.147124694 |
| -0.079566667 | 0.085133333  | 0.197766667 | 1.146921513 |
| 0.049166667  | 0.058866667  | 0.1977      | 1.146868515 |
| 0.030866667  | -0.005633333 | 0.197688889 | 1.146859682 |
| 0.2691       | 0.1413       | 0.197555556 | 1.146753695 |
| -0.044933333 | -0.102066667 | 0.197466667 | 1.146683042 |
| 0.098        | -0.0611      | 0.197344444 | 1.146585901 |
| 0.102466667  | 0.149533333  | 0.197322222 | 1.14656824  |
| 0.194566667  | 0.2004       | 0.1973      | 1.146550579 |
| 0.0255       | 0.212433333  | 0.1973      | 1.146550579 |
| 0.222333333  | 0.286533333  | 0.197266667 | 1.146524089 |
| 0.233566667  | -0.002033333 | 0.197255556 | 1.146515259 |
| 0.0396       | 0.1122       | 0.197122222 | 1.146409303 |
| 0.229266667  | 0.151633333  | 0.197111111 | 1.146400474 |

|              |              |             |             |
|--------------|--------------|-------------|-------------|
| 0.156933333  | 0.0281       | 0.197077778 | 1.146373987 |
| -0.100233333 | 0.018433333  | 0.197011111 | 1.146321014 |
| 0.090833333  | 0.214633333  | 0.196922222 | 1.146250388 |
| 0.059233333  | 0.155666667  | 0.196844444 | 1.146188594 |
| -0.028066667 | -0.0115      | 0.1967      | 1.146073842 |
| 0.0237       | 0.066666667  | 0.196511111 | 1.145923798 |
| 0.153266667  | 0.119266667  | 0.196477778 | 1.145897322 |
| -0.008733333 | 0.032166667  | 0.196422222 | 1.145853197 |
| -0.054433333 | -0.146666667 | 0.196355556 | 1.145800248 |
| 0.0771       | 0.284066667  | 0.196322222 | 1.145773775 |
| 0.249233333  | 0.299333333  | 0.196311111 | 1.145764951 |
| 0.089033333  | 0.102033333  | 0.196266667 | 1.145729654 |
| 0.315266667  | 0.159633333  | 0.196111111 | 1.145606125 |
| 0.1739       | 0.207433333  | 0.196111111 | 1.145606125 |
| 0.143833333  | -0.095766667 | 0.195877778 | 1.145420856 |
| -0.106933333 | 0.098266667  | 0.195744444 | 1.145315002 |
| 8.00E-04     | 0.033233333  | 0.195666667 | 1.145253258 |
| 0.1103       | 0.012433333  | 0.195611111 | 1.145209157 |
| 0.0946       | 0.089533333  | 0.195311111 | 1.144971042 |
| 0.1825       | 0.295466667  | 0.195244444 | 1.144918134 |
| 0.168166667  | 0.143966667  | 0.195222222 | 1.144900499 |
| -0.154366667 | -0.069       | 0.195188889 | 1.144874047 |
| -0.003233333 | -0.044166667 | 0.195133333 | 1.14482996  |
| -0.1312      | 0.3537       | 0.195055556 | 1.144768243 |
| 0.2579       | 0.354733333  | 0.195033333 | 1.14475061  |
| -0.024733333 | 0.1222       | 0.195       | 1.144724161 |
| 0.0057       | -0.1183      | 0.194911111 | 1.144653633 |
| 0.1301       | 0.071466667  | 0.194855556 | 1.144609555 |
| 0.141033333  | 0.2314       | 0.1948      | 1.144565479 |
| -0.050066667 | -0.011866667 | 0.194622222 | 1.144424447 |
| 0.273866667  | -0.0369      | 0.194588889 | 1.144398006 |
| 0.055766667  | 0.3489       | 0.1945      | 1.144327498 |
| 0.288633333  | -0.030666667 | 0.194444444 | 1.144283433 |
| 0.021433333  | 0.010433333  | 0.194377778 | 1.144230557 |
| 0.082066667  | 0.0727       | 0.194344444 | 1.14420412  |
| 0.156366667  | 0.300033333  | 0.194344444 | 1.14420412  |
| 0.0735       | 0.181466667  | 0.194222222 | 1.14410719  |
| 0.1341       | 0.128233333  | 0.194066667 | 1.143983835 |
| 0.1281       | 0.019466667  | 0.193944444 | 1.143886923 |
| -0.0428      | -0.058066667 | 0.1939      | 1.143851685 |
| 0.144633333  | 0.0823       | 0.193755556 | 1.143737167 |
| 0.244833333  | 0.106366667  | 0.193744444 | 1.143728358 |
| 0.1761       | -0.0398      | 0.193733333 | 1.143719549 |
| 0.048366667  | 0.134066667  | 0.193688889 | 1.143684316 |
| -0.0232      | 0.1434       | 0.193688889 | 1.143684316 |
| 0.024466667  | -0.002933333 | 0.193666667 | 1.1436667   |
| 0.169733333  | 0.246        | 0.193644444 | 1.143649083 |

|              |              |             |             |
|--------------|--------------|-------------|-------------|
| 0.2786       | 0.0167       | 0.193544444 | 1.143569815 |
| 0.145266667  | -0.055466667 | 0.193455556 | 1.143499358 |
| 0.154933333  | 0.1982       | 0.193366667 | 1.143428905 |
| 0.136066667  | 0.049466667  | 0.193322222 | 1.143393681 |
| 0.187833333  | 0.121066667  | 0.193311111 | 1.143384875 |
| 0.025533333  | 0.077266667  | 0.193266667 | 1.143349652 |
| 0.1508       | 0.305        | 0.192911111 | 1.143067905 |
| 0.009933333  | 0.2312       | 0.1929      | 1.143059102 |
| 0.111333333  | -0.071233333 | 0.192766667 | 1.142953466 |
| 0.1352       | 0.010666667  | 0.192555556 | 1.142786228 |
| 0.2084       | -0.0084      | 0.192355556 | 1.142627815 |
| 0.095633333  | 0.0174       | 0.192244444 | 1.142539818 |
| 0.05         | 0.037366667  | 0.192177778 | 1.142487022 |
| 0.117266667  | 0.206166667  | 0.192122222 | 1.142443028 |
| 0.094966667  | 0.162366667  | 0.191944444 | 1.142302258 |
| 0.125833333  | 0.047066667  | 0.191888889 | 1.142258271 |
| -0.030666667 | -0.0094      | 0.191877778 | 1.142249474 |
| 0.2099       | 0.224833333  | 0.191833333 | 1.142214285 |
| 0.007666667  | 0.239466667  | 0.191811111 | 1.142196692 |
| -0.135033333 | -0.074433333 | 0.191611111 | 1.142038361 |
| 0.227066667  | 0.064466667  | 0.1914      | 1.141871257 |
| 0.217033333  | -0.293066667 | 0.191277778 | 1.141774524 |
| 0.290966667  | 0.3124       | 0.191255556 | 1.141756937 |
| 0.062566667  | 0.117266667  | 0.1912      | 1.141712971 |
| 0.194366667  | 0.084333333  | 0.190922222 | 1.141493166 |
| -0.059433333 | 0.1741       | 0.190911111 | 1.141484375 |
| 0.2402       | 0.0893       | 0.1909      | 1.141475583 |
| 0.263466667  | 0.1254       | 0.190822222 | 1.141414046 |
| -0.090966667 | 0.143533333  | 0.1906      | 1.141238245 |
| -0.117766667 | -0.066866667 | 0.1906      | 1.141238245 |
| 0.368133333  | -0.051433333 | 0.190311111 | 1.141009743 |
| 0.263833333  | 0.130733333  | 0.190244444 | 1.140957019 |
| -0.0459      | 0.386533333  | 0.1902      | 1.14092187  |
| 0.112966667  | 0.041933333  | 0.190077778 | 1.140825218 |
| 0.1008       | 0.206833333  | 0.190011111 | 1.140772502 |
| 0.429033333  | 0.001633333  | 0.189855556 | 1.140649507 |
| 0.131533333  | 0.1492       | 0.189833333 | 1.140631937 |
| 0.008066667  | -0.091433333 | 0.189677778 | 1.140508958 |
| 0.112666667  | 0.057        | 0.1896      | 1.140447473 |
| 0.1922       | 0.292366667  | 0.189566667 | 1.140421123 |
| 0.128566667  | -0.0749      | 0.189433333 | 1.140315731 |
| -0.0245      | 0.016133333  | 0.189411111 | 1.140298166 |
| 0.109233333  | 0.1957       | 0.189177778 | 1.140113756 |
| -0.0264      | 0.1475       | 0.189144444 | 1.140087414 |
| 0.310433333  | 0.247733333  | 0.189011111 | 1.139982052 |
| 0.0789       | -0.050366667 | 0.188888889 | 1.139885479 |
| -0.056166667 | 0.074233333  | 0.188888889 | 1.139885479 |

|              |              |             |             |
|--------------|--------------|-------------|-------------|
| -0.021733333 | -0.106133333 | 0.188811111 | 1.139824028 |
| 0.098266667  | -0.080466667 | 0.188711111 | 1.139745024 |
| 0.0799       | 0.024233333  | 0.1887      | 1.139736247 |
| 0.043433333  | 0.069966667  | 0.188655556 | 1.139701136 |
| 0.0756       | 0.217733333  | 0.188577778 | 1.139639694 |
| 0.093366667  | 0.209133333  | 0.188533333 | 1.139604587 |
| 0.343333333  | -0.010833333 | 0.188488889 | 1.13956948  |
| 0.083        | 0.110566667  | 0.1884      | 1.13949927  |
| 0.033233333  | 0.0059       | 0.188244444 | 1.139376412 |
| 0.1314       | 0.2772       | 0.188211111 | 1.139350087 |
| 0.251933333  | 0.2355       | 0.188088889 | 1.139253568 |
| 0.153933333  | 0.0403       | 0.187966667 | 1.139157057 |
| 0.194166667  | -0.118333333 | 0.187811111 | 1.139034236 |
| -0.070366667 | -0.090866667 | 0.187522222 | 1.138806176 |
| 0.3214       | 0.165633333  | 0.187366667 | 1.138683393 |
| 0.144533333  | 0.0921       | 0.187277778 | 1.138613238 |
| 0.063133333  | 0.1564       | 0.187188889 | 1.138543086 |
| 0.3786       | 0.086366667  | 0.187155556 | 1.138516781 |
| 0.2078       | 0.083966667  | 0.186977778 | 1.138376494 |
| -0.078533333 | -0.0957      | 0.186966667 | 1.138367727 |
| 0.194766667  | 0.047966667  | 0.186788889 | 1.138227459 |
| 0.035233333  | 0.002733333  | 0.186722222 | 1.138174863 |
| 0.143833333  | -0.374133333 | 0.186566667 | 1.138052148 |
| -0.162566667 | -0.051066667 | 0.186544444 | 1.138034618 |
| 0.182666667  | 0.222366667  | 0.186433333 | 1.137946975 |
| 0.038033333  | -0.033233333 | 0.186433333 | 1.137946975 |
| 0.3397       | 0.034833333  | 0.186344444 | 1.137876864 |
| 0.099866667  | 0.135266667  | 0.1862      | 1.137762944 |
| 0.089833333  | 0.188666667  | 0.186177778 | 1.137745419 |
| 0.1765       | -0.036       | 0.186155556 | 1.137727894 |
| 0.133366667  | 0.3349       | 0.185544444 | 1.137246066 |
| 0.253933333  | -0.066666667 | 0.185533333 | 1.137237308 |
| 0.072333333  | 0.130366667  | 0.1855      | 1.137211032 |
| 0.347333333  | 0.0441       | 0.185422222 | 1.137149725 |
| 0.065933333  | 0.0385       | 0.185155556 | 1.136939555 |
| -0.193133333 | -0.109233333 | 0.185011111 | 1.136825729 |
| -0.1595      | -0.136566667 | 0.184988889 | 1.136808218 |
| 0.0157       | -0.011466667 | 0.184966667 | 1.136790707 |
| 0.233933333  | 0.334033333  | 0.184766667 | 1.136633126 |
| 0.1814       | 0.112733333  | 0.184755556 | 1.136624372 |
| 0.095566667  | 0.112133333  | 0.184611111 | 1.136510577 |
| 0.259533333  | 0.023333333  | 0.184544444 | 1.136458061 |
| 0.153933333  | -0.143166667 | 0.184544444 | 1.136458061 |
| 0.115466667  | 0.018733333  | 0.184466667 | 1.136396794 |
| 0.190166667  | 0.204966667  | 0.184433333 | 1.136370538 |
| 0.117666667  | 0.037566667  | 0.184266667 | 1.136239267 |
| 0.146        | -0.0133      | 0.183988889 | 1.136020516 |

|              |              |             |             |
|--------------|--------------|-------------|-------------|
| -0.336166667 | -0.222266667 | 0.183811111 | 1.135880537 |
| 0.043366667  | -0.0738      | 0.183788889 | 1.135863041 |
| 0.318333333  | 0.103133333  | 0.183777778 | 1.135854293 |
| 0.393466667  | 0.060566667  | 0.183755556 | 1.135836797 |
| 0.1283       | 0.071233333  | 0.183744444 | 1.135828049 |
| 0.073533333  | 0.0784       | 0.183588889 | 1.135705587 |
| 0.043466667  | -0.059233333 | 0.183544444 | 1.135670601 |
| 0.006166667  | -0.0205      | 0.183411111 | 1.135565647 |
| 0.180366667  | 0.205033333  | 0.183322222 | 1.135495684 |
| 0.057033333  | -0.167666667 | 0.183277778 | 1.135460704 |
| -0.0198      | -0.0699      | 0.183244444 | 1.135434469 |
| 0.149433333  | 0.162866667  | 0.183233333 | 1.135425725 |
| 0.136033333  | 0.122766667  | 0.183177778 | 1.135382002 |
| 0.225966667  | 0.186133333  | 0.183122222 | 1.135338282 |
| 0.2222       | 0.084166667  | 0.1831      | 1.135320794 |
| 0.0176       | 0.056666667  | 0.183033333 | 1.135268332 |
| 0.097366667  | 0.0508       | 0.182911111 | 1.135172159 |
| 0.094166667  | 0.0376       | 0.182911111 | 1.135172159 |
| 0.023033333  | 0.050533333  | 0.182866667 | 1.135137188 |
| 0.1098       | 0.1036       | 0.182822222 | 1.135102219 |
| 0.168333333  | 0.2555       | 0.182777778 | 1.135067251 |
| 0.2667       | -0.0385      | 0.1825      | 1.134848725 |
| 0.259133333  | 0.080066667  | 0.182477778 | 1.134831245 |
| -0.008633333 | 0.1193       | 0.182355556 | 1.134735109 |
| 0.2101       | 0.0801       | 0.182144444 | 1.134569074 |
| 0.025533333  | 0.149633333  | 0.182144444 | 1.134569074 |
| 0.098866667  | 0.161533333  | 0.182122222 | 1.134551598 |
| -0.008966667 | -0.1399      | 0.182077778 | 1.134516647 |
| 0.8747       | 0.999633333  | 0.182022222 | 1.134472959 |
| 0.084533333  | 0.0414       | 0.181888889 | 1.134368117 |
| 0.0466       | 0.1687       | 0.181833333 | 1.134324435 |
| 0.078366667  | 0.030233333  | 0.181733333 | 1.134245812 |
| 0.151366667  | -0.008233333 | 0.181677778 | 1.134202136 |
| 0.0061       | -0.0956      | 0.181422222 | 1.134001243 |
| -0.253233333 | -0.098233333 | 0.181088889 | 1.133739264 |
| 0.044333333  | 0.2167       | 0.181077778 | 1.133730532 |
| 0.255133333  | 0.099233333  | 0.181       | 1.133669413 |
| 0.035333333  | 0.191566667  | 0.180944444 | 1.133625758 |
| -0.0452      | -0.139333333 | 0.180766667 | 1.133486074 |
| 0.104733333  | 0.124133333  | 0.180755556 | 1.133477345 |
| 0.113233333  | 0.135366667  | 0.180744444 | 1.133468615 |
| 0.050766667  | 0.012733333  | 0.180655556 | 1.133398781 |
| 0.094933333  | 0.038066667  | 0.180611111 | 1.133363865 |
| 0.020133333  | 0.111333333  | 0.180555556 | 1.133320222 |
| 0.133966667  | 0.104933333  | 0.180211111 | 1.133049674 |
| 0.431133333  | 0.3141       | 0.180111111 | 1.132971139 |
| 0.0205       | 0.026333333  | 0.180111111 | 1.132971139 |

|              |              |             |             |
|--------------|--------------|-------------|-------------|
| 0.241333333  | 0.1823       | 0.180066667 | 1.132936237 |
| 0.218866667  | 0.195        | 0.179977778 | 1.132866435 |
| 0.166333333  | 0.1892       | 0.179888889 | 1.132796638 |
| 0.0093       | 0.0616       | 0.179877778 | 1.132787914 |
| 0.006033333  | -0.0282      | 0.179866667 | 1.132779189 |
| 0.067233333  | 0.1353       | 0.179766667 | 1.132700674 |
| 0.045066667  | 0.030266667  | 0.179755556 | 1.13269195  |
| -0.134266667 | -0.0381      | 0.179544444 | 1.132526214 |
| 0.095933333  | 0.129        | 0.179488889 | 1.132482604 |
| 0.214333333  | 0.252033333  | 0.179366667 | 1.132386666 |
| -0.1328      | 0.012733333  | 0.179355556 | 1.132377945 |
| -0.057533333 | 0.0971       | 0.179344444 | 1.132369224 |
| 0.197166667  | 0.1325       | 0.1793      | 1.13233434  |
| 0.148266667  | 0.1278       | 0.179277778 | 1.132316898 |
| 0.144266667  | 0.011066667  | 0.179233333 | 1.132282016 |
| -0.0561      | 0.1201       | 0.1791      | 1.132177376 |
| -0.0803      | -0.102333333 | 0.179055556 | 1.132142498 |
| 0.025933333  | 0.059533333  | 0.178844444 | 1.131976843 |
| -0.030733333 | 0.135        | 0.178788889 | 1.131933253 |
| 0.1402       | 0.025233333  | 0.178744444 | 1.131898383 |
| 0.0993       | 0.1503       | 0.178722222 | 1.131880948 |
| 0.135        | 0.143666667  | 0.178555556 | 1.131750195 |
| 0.065033333  | 0.2333       | 0.178422222 | 1.131645604 |
| -0.181933333 | -0.026166667 | 0.1784      | 1.131628173 |
| 0.1152       | 0.157533333  | 0.178388889 | 1.131619458 |
| 0.0461       | 0.038833333  | 0.178377778 | 1.131610743 |
| 0.2609       | 0.115266667  | 0.178022222 | 1.131331889 |
| -0.035066667 | -0.1381      | 0.1778      | 1.13115764  |
| 0.2818       | 0.2226       | 0.177722222 | 1.13109666  |
| 0.112466667  | 0.159266667  | 0.177666667 | 1.131053104 |
| 0.105933333  | 0.033733333  | 0.1776      | 1.131000839 |
| -0.122233333 | 0.012166667  | 0.177388889 | 1.130835351 |
| -0.0356      | 0.111266667  | 0.177255556 | 1.130730844 |
| -0.017333333 | 0.163733333  | 0.177222222 | 1.130704719 |
| -0.074566667 | -0.2142      | 0.177088889 | 1.130600225 |
| 0.139366667  | -0.068       | 0.176977778 | 1.130513153 |
| 0.128466667  | 0.205266667  | 0.176933333 | 1.130478327 |
| -0.0404      | 0.065066667  | 0.176855556 | 1.130417383 |
| 0.1358       | 0.157933333  | 0.176844444 | 1.130408677 |
| -0.020733333 | -0.099333333 | 0.175644444 | 1.12946882  |
| 0.048566667  | 0.022066667  | 0.175577778 | 1.129416629 |
| 0.026966667  | 0.081033333  | 0.175533333 | 1.129381836 |
| -0.192433333 | 0.152066667  | 0.175444444 | 1.129312253 |
| 0.053166667  | 0.027166667  | 0.175433333 | 1.129303556 |
| 0.1345       | 0.2518       | 0.175388889 | 1.129268766 |
| 0.047933333  | 0.346533333  | 0.175355556 | 1.129242675 |
| 0.114        | 0.206266667  | 0.175288889 | 1.129190494 |

|              |              |             |             |
|--------------|--------------|-------------|-------------|
| 0.074433333  | 8.00E-04     | 0.175266667 | 1.129173101 |
| 0.0145       | 0.218933333  | 0.175188889 | 1.129112227 |
| 0.014733333  | 0.1965       | 0.175122222 | 1.129060052 |
| 0.0432       | 0.245433333  | 0.175033333 | 1.12899049  |
| 0.1695       | 0.1129       | 0.174877778 | 1.128868765 |
| 0.007133333  | 0.043033333  | 0.174811111 | 1.128816602 |
| 0.036266667  | -0.1291      | 0.1748      | 1.128807908 |
| 0.226966667  | 0.153633333  | 0.174711111 | 1.128738361 |
| 0.0119       | 0.049133333  | 0.174633333 | 1.12867751  |
| 0.088366667  | 0.0083       | 0.174622222 | 1.128668818 |
| -0.030933333 | 0.0996       | 0.1746      | 1.128651433 |
| 0.139966667  | 0.104566667  | 0.174544444 | 1.128607971 |
| -0.148733333 | -0.109533333 | 0.174522222 | 1.128590587 |
| -0.0225      | 0.132133333  | 0.174477778 | 1.12855582  |
| -0.014966667 | -0.037366667 | 0.174333333 | 1.128442833 |
| 0.063266667  | 0.280433333  | 0.174155556 | 1.128303788 |
| 0.179933333  | 0.286066667  | 0.173877778 | 1.128086564 |
| 0.114        | 0.157733333  | 0.173766667 | 1.127999686 |
| 0.366733333  | -0.045033333 | 0.173622222 | 1.127886755 |
| 0.120766667  | -0.0248      | 0.173544444 | 1.127825951 |
| -0.009166667 | 0.0442       | 0.173522222 | 1.127808579 |
| -0.0539      | 0.109433333  | 0.173488889 | 1.127782521 |
| 0.426333333  | 0.077933333  | 0.173311111 | 1.127643558 |
| 0.039566667  | 0.063033333  | 0.173077778 | 1.127461194 |
| 0.059333333  | 0.068333333  | 0.173055556 | 1.127443827 |
| 0.134566667  | 0.0827       | 0.172988889 | 1.127391729 |
| 0.262933333  | 0.004133333  | 0.1729      | 1.127322269 |
| 0.0385       | -0.052466667 | 0.1727      | 1.127166    |
| 0.0134       | -0.123166667 | 0.1727      | 1.127166    |
| 0.168333333  | 0.0213       | 0.1727      | 1.127166    |
| 0.029        | 0.047466667  | 0.172588889 | 1.127079193 |
| -0.0473      | 0.006933333  | 0.172455556 | 1.126975034 |
| 0.279966667  | 0.358066667  | 0.172311111 | 1.126862205 |
| 0.121933333  | 0.2314       | 0.172288889 | 1.126844848 |
| 0.1075       | -0.0049      | 0.172266667 | 1.126827491 |
| 0.130333333  | 0.241433333  | 0.1721      | 1.126697322 |
| 0.02         | 0.235066667  | 0.171877778 | 1.126523788 |
| -0.0967      | -0.0564      | 0.171833333 | 1.126489084 |
| 0.413566667  | 0.467633333  | 0.171755556 | 1.126428355 |
| 0.0424       | -0.052066667 | 0.171677778 | 1.126367629 |
| 0.091766667  | -0.0314      | 0.171566667 | 1.126280884 |
| 0.256266667  | -0.147       | 0.1714      | 1.126150778 |
| 0.161066667  | 0.178966667  | 0.171377778 | 1.126133432 |
| 0.001266667  | 0.0428       | 0.171277778 | 1.126055377 |
| 0.153966667  | 0.118        | 0.171244444 | 1.12602936  |
| -0.000766667 | 0.1155       | 0.171222222 | 1.126012015 |
| 0.020866667  | -0.035166667 | 0.171166667 | 1.125968656 |

|              |              |             |             |
|--------------|--------------|-------------|-------------|
| 0.142933333  | 0.026433333  | 0.171144444 | 1.125951312 |
| -0.0317      | -0.0349      | 0.171033333 | 1.125864599 |
| 0.0207       | 0.009133333  | 0.170888889 | 1.125751881 |
| 0.214966667  | 0.135        | 0.170855556 | 1.125725871 |
| -0.122566667 | 0.049533333  | 0.1708      | 1.125682523 |
| 0.436566667  | 0.3671       | 0.170755556 | 1.125647845 |
| 0.111        | 0.090566667  | 0.170711111 | 1.125613168 |
| -0.032566667 | 0.067633333  | 0.170622222 | 1.125543818 |
| -0.090066667 | 0.006933333  | 0.170577778 | 1.125509144 |
| 0.2741       | 0.1629       | 0.170566667 | 1.125500476 |
| -0.051966667 | 0.148433333  | 0.170433333 | 1.125396462 |
| 0.013233333  | -0.231466667 | 0.170377778 | 1.125353126 |
| 0.109966667  | -0.009366667 | 0.170266667 | 1.125266459 |
| 0.145333333  | 0.064        | 0.170233333 | 1.12524046  |
| 0.031766667  | 0.0309       | 0.170088889 | 1.125127805 |
| -0.0037      | 0.029033333  | 0.170011111 | 1.12506715  |
| 0.071833333  | 0.1023       | 0.169955556 | 1.125023826 |
| 0.069        | 0.0306       | 0.169933333 | 1.125006497 |
| -0.064033333 | -0.091033333 | 0.169888889 | 1.12497184  |
| 0.173733333  | 0.2111       | 0.169877778 | 1.124963176 |
| 0.114433333  | 0.100166667  | 0.169822222 | 1.124919857 |
| -0.063633333 | 0.066166667  | 0.169611111 | 1.124755258 |
| 0.1077       | -0.088233333 | 0.169511111 | 1.124677299 |
| 0.1629       | 0.176666667  | 0.169455556 | 1.12463399  |
| 0.0215       | -0.377133333 | 0.169388889 | 1.124582022 |
| 0.042        | -0.136933333 | 0.169311111 | 1.124521396 |
| -0.151933333 | -0.142533333 | 0.169233333 | 1.124460773 |
| -0.027266667 | -0.093866667 | 0.169233333 | 1.124460773 |
| -0.1065      | 0.1145       | 0.169111111 | 1.124365515 |
| 0.0685       | 0.166533333  | 0.168944444 | 1.124235631 |
| 0.265166667  | -0.333733333 | 0.168911111 | 1.124209656 |
| 0.052366667  | 0.071866667  | 0.1688      | 1.124123076 |
| -0.2339      | -0.139333333 | 0.168788889 | 1.124114419 |
| 0.131933333  | 0.3461       | 0.168611111 | 1.123975907 |
| 0.0706       | 0.132833333  | 0.168588889 | 1.123958594 |
| 0.3002       | 0.097166667  | 0.168588889 | 1.123958594 |
| -0.092433333 | -0.1153      | 0.168477778 | 1.123872034 |
| 0.314866667  | 0.066566667  | 0.168222222 | 1.123672972 |
| 0.134133333  | -0.0419      | 0.168177778 | 1.123638356 |
| 0.0821       | 0.051733333  | 0.168144444 | 1.123612395 |
| 0.2087       | 0.224133333  | 0.1681      | 1.123577781 |
| 0.185        | 0.2039       | 0.167944444 | 1.12345664  |
| 0.238766667  | 0.1074       | 0.167911111 | 1.123430683 |
| 0.056366667  | -0.0108      | 0.167877778 | 1.123404726 |
| 0.1268       | -0.0029      | 0.1677      | 1.123266302 |
| 0.159733333  | 0.095        | 0.167477778 | 1.123093296 |
| 0.074566667  | 0.007233333  | 0.167355556 | 1.122998153 |



|              |              |             |             |
|--------------|--------------|-------------|-------------|
| -0.089866667 | 0.053933333  | 0.167344444 | 1.122989505 |
| -0.130433333 | -0.153133333 | 0.167222222 | 1.122894371 |
| 0.068933333  | 0.066933333  | 0.167177778 | 1.122859779 |
| 0.225566667  | 0.119833333  | 0.167155556 | 1.122842484 |
| 0.147033333  | 0.0973       | 0.167144444 | 1.122833836 |
| 0.014833333  | 0.0577       | 0.167022222 | 1.122738716 |
| 0.061033333  | -0.093666667 | 0.166966667 | 1.122695482 |
| 0.073166667  | 0.326133333  | 0.166966667 | 1.122695482 |
| 0.041866667  | -0.045333333 | 0.166955556 | 1.122686835 |
| -0.0685      | -0.007533333 | 0.166922222 | 1.122660896 |
| -0.111833333 | -0.0434      | 0.166788889 | 1.122557145 |
| 0.0939       | -0.0552      | 0.166688889 | 1.122479338 |
| 0.0943       | 0.0779       | 0.166566667 | 1.122384248 |
| 0.192566667  | 0.260666667  | 0.166555556 | 1.122375604 |
| 0.1424       | 0.076766667  | 0.166511111 | 1.122341028 |
| -0.0223      | 0.115        | 0.1664      | 1.122254592 |
| 0.480833333  | 0.003033333  | 0.166355556 | 1.12222002  |
| 0.058833333  | -0.167633333 | 0.166288889 | 1.122168164 |
| -0.039533333 | -0.2         | 0.166266667 | 1.122150879 |
| 0.2672       | 0.0289       | 0.1662      | 1.122099026 |
| -0.119133333 | 0.058566667  | 0.166188889 | 1.122090384 |
| 0.061333333  | 0.079933333  | 0.166       | 1.121943481 |
| 0.227166667  | 0.224133333  | 0.165922222 | 1.121882997 |
| -0.065733333 | 0.056533333  | 0.1659      | 1.121865716 |
| 0.064366667  | 0.037166667  | 0.165833333 | 1.121813876 |
| 0.098666667  | 0.0706       | 0.165611111 | 1.121641093 |
| 0.077        | -0.066633333 | 0.165433333 | 1.121502886 |
| -0.008966667 | 0.1885       | 0.165388889 | 1.121468337 |
| 0.073633333  | 0.224133333  | 0.165277778 | 1.121381969 |
| 0.017066667  | 0.026866667  | 0.165222222 | 1.121338788 |
| 0.106566667  | -0.114966667 | 0.165211111 | 1.121330151 |
| 0.004066667  | 0.1896       | 0.165166667 | 1.121295608 |
| 0.262133333  | 0.085333333  | 0.165055556 | 1.121209253 |
| 0.1121       | 0.100266667  | 0.165033333 | 1.121191983 |
| 0.084566667  | 0.019733333  | 0.164988889 | 1.121157443 |
| 0.037566667  | 0.125333333  | 0.164977778 | 1.121148809 |
| -0.0381      | -0.0256      | 0.164822222 | 1.12102793  |
| 0.1855       | 0.0345       | 0.164677778 | 1.120915696 |
| 0.031733333  | 0.000133333  | 0.164633333 | 1.120881165 |
| 0.102433333  | 0.0054       | 0.164588889 | 1.120846635 |
| 0.1409       | -0.2742      | 0.164588889 | 1.120846635 |
| 0.060766667  | 0.145366667  | 0.1644      | 1.120699895 |
| 0.0293       | 0.096        | 0.1644      | 1.120699895 |
| 0.107266667  | 0.063        | 0.164277778 | 1.120604956 |
| 0.0582       | -0.0332      | 0.164211111 | 1.120553174 |
| 0.210133333  | 0.294533333  | 0.1641      | 1.120466876 |
| -0.077066667 | -0.059666667 | 0.164077778 | 1.120449618 |

|              |              |             |             |
|--------------|--------------|-------------|-------------|
| 0.154733333  | 0.154933333  | 0.163922222 | 1.120328814 |
| -0.0485      | -0.026933333 | 0.163833333 | 1.120259789 |
| 0.218666667  | 0.0703       | 0.163777778 | 1.120216651 |
| -0.074466667 | -0.140333333 | 0.163766667 | 1.120208023 |
| -0.000633333 | 0.078466667  | 0.163733333 | 1.120182141 |
| 0.295233333  | -0.241566667 | 0.163622222 | 1.120095872 |
| 0.135733333  | 0.054466667  | 0.163344444 | 1.119880229 |
| 0.0962       | 0.191766667  | 0.163344444 | 1.119880229 |
| 0.0691       | 0.161433333  | 0.1632      | 1.119768111 |
| 0.0474       | 0.177933333  | 0.163177778 | 1.119750863 |
| 0.080733333  | 0.0719       | 0.163111111 | 1.11969912  |
| 0.1209       | 0.130233333  | 0.1631      | 1.119690497 |
| 0.015933333  | 0.151533333  | 0.163088889 | 1.119681874 |
| 0.063666667  | 0.1262       | 0.162988889 | 1.119604266 |
| 0.1283       | 0.260666667  | 0.162911111 | 1.119543908 |
| 0.1546       | 0.210733333  | 0.162644444 | 1.119336991 |
| 0.279166667  | 0.183633333  | 0.162533333 | 1.119250788 |
| 0.2923       | -0.0299      | 0.162344444 | 1.119104256 |
| 0.096233333  | 0.0599       | 0.162311111 | 1.1190784   |
| 0.0114       | -0.059966667 | 0.162266667 | 1.119043925 |
| 0.042        | 0.1664       | 0.162244444 | 1.119026688 |
| -0.2123      | -0.030333333 | 0.162144444 | 1.118949126 |
| 0.0897       | 0.137833333  | 0.162144444 | 1.118949126 |
| -0.013533333 | 0.5014       | 0.162066667 | 1.118888803 |
| 0.049733333  | 0.2077       | 0.162022222 | 1.118854335 |
| -0.003833333 | 0.046633333  | 0.161844444 | 1.118716471 |
| 0.075233333  | 0.078533333  | 0.161788889 | 1.118673392 |
| 0.272866667  | 0.0676       | 0.161777778 | 1.118664777 |
| 0.0546       | 0.0683       | 0.1617      | 1.11860447  |
| 0.1878       | -0.142366667 | 0.1617      | 1.11860447  |
| -0.0537      | 0.158733333  | 0.161644444 | 1.118561395 |
| 0.144366667  | 0.169166667  | 0.161611111 | 1.118535551 |
| 0.270133333  | 0.0041       | 0.161533333 | 1.118475251 |
| 0.075066667  | 0.234566667  | 0.161422222 | 1.118389113 |
| 0.0783       | 0.127133333  | 0.161344444 | 1.118328821 |
| -0.0777      | 0.072466667  | 0.161244444 | 1.118251307 |
| -0.033466667 | 0.151733333  | 0.161233333 | 1.118242695 |
| 8.00E-04     | 0.184533333  | 0.161177778 | 1.118199634 |
| -0.022633333 | -0.0448      | 0.161122222 | 1.118156575 |
| 0.055266667  | 0.1936       | 0.161077778 | 1.118122129 |
| 0.0646       | 0.1096       | 0.160855556 | 1.117949915 |
| 0.151066667  | 0.095966667  | 0.160577778 | 1.117734684 |
| 0.0285       | 0.179666667  | 0.160555556 | 1.117717468 |
| -0.0052      | 0.1348       | 0.160311111 | 1.117528102 |
| -0.107233333 | -0.0086      | 0.1603      | 1.117519496 |
| 0.0791       | 0.4467       | 0.160233333 | 1.117467856 |
| 0.303        | 0.088266667  | 0.1602      | 1.117442038 |

|              |              |             |             |
|--------------|--------------|-------------|-------------|
| 0.224466667  | 0.1015       | 0.1602      | 1.117442038 |
| 0.0411       | -0.082433333 | 0.159977778 | 1.117269928 |
| 0.287766667  | 0.0114       | 0.159966667 | 1.117261324 |
| 0.0006       | 0.091133333  | 0.159855556 | 1.117175279 |
| 0.2301       | 0.3743       | 0.1598      | 1.11713226  |
| -0.0496      | 0.047633333  | 0.159622222 | 1.116994608 |
| 0.047766667  | 0.039333333  | 0.159566667 | 1.116951596 |
| 0.028933333  | -0.071266667 | 0.159444444 | 1.116856974 |
| 0.2062       | 0.0701       | 0.1594      | 1.116822568 |
| 0.1449       | 0.196433333  | 0.159344444 | 1.116779562 |
| 0.020633333  | -0.145933333 | 0.159266667 | 1.116719356 |
| 0.101633333  | 0.121133333  | 0.159155556 | 1.116633354 |
| 0.144533333  | 0.114566667  | 0.159144444 | 1.116624754 |
| -0.051866667 | 0.000433333  | 0.159055556 | 1.116555958 |
| 0.021366667  | -0.083166667 | 0.159033333 | 1.116538759 |
| -0.034666667 | 0.006233333  | 0.158933333 | 1.116461369 |
| 0.0454       | 0.066633333  | 0.158888889 | 1.116426976 |
| 0.022933333  | -0.126366667 | 0.158866667 | 1.116409779 |
| 0.0452       | 0.160933333  | 0.158644444 | 1.116237829 |
| 0.040133333  | 0.2135       | 0.158633333 | 1.116229232 |
| -0.0175      | -0.0643      | 0.158611111 | 1.116212038 |
| -0.0823      | -0.0697      | 0.1586      | 1.116203442 |
| -0.067133333 | 0.0136       | 0.158555556 | 1.116169056 |
| 0.0904       | 0.149633333  | 0.158555556 | 1.116169056 |
| 0.038833333  | 0.112466667  | 0.158488889 | 1.116117479 |
| -0.009766667 | 0.143733333  | 0.158377778 | 1.116031523 |
| 0.485466667  | 0.536        | 0.158155556 | 1.115859631 |
| 0.516733333  | 0.138066667  | 0.158133333 | 1.115842443 |
| -0.134966667 | -0.092466667 | 0.158122222 | 1.11583385  |
| 0.0785       | -0.2283      | 0.158111111 | 1.115825256 |
| -0.1129      | -0.0862      | 0.158077778 | 1.115799475 |
| 0.042766667  | 0.217666667  | 0.158066667 | 1.115790882 |
| 0.086433333  | 0.191        | 0.158066667 | 1.115790882 |
| 0.274566667  | 0.295833333  | 0.158022222 | 1.115756508 |
| 0.189933333  | 0.1738       | 0.158011111 | 1.115747915 |
| 0.040933333  | 0.0028       | 0.157966667 | 1.115713544 |
| 0.1234       | 0.171766667  | 0.157944444 | 1.115696358 |
| 0.062466667  | -0.027433333 | 0.157866667 | 1.115636211 |
| 0.0646       | 0.1098       | 0.157866667 | 1.115636211 |
| 0.406366667  | 0.125133333  | 0.157855556 | 1.115627619 |
| -0.061633333 | -0.105566667 | 0.157788889 | 1.115576067 |
| 0.002633333  | -0.000166667 | 0.157688889 | 1.115498744 |
| 0.3381       | 0.1097       | 0.157555556 | 1.115395655 |
| 0.363133333  | -0.0166      | 0.157477778 | 1.115335524 |
| -0.060366667 | -0.123433333 | 0.157322222 | 1.115215271 |
| -0.0535      | 0.067033333  | 0.1573      | 1.115198094 |
| -0.051566667 | 0.0658       | 0.157155556 | 1.115086444 |

|              |              |             |             |
|--------------|--------------|-------------|-------------|
| 0.072733333  | 0.160766667  | 0.157155556 | 1.115086444 |
| -0.052666667 | -0.131933333 | 0.1571      | 1.115043505 |
| -0.0401      | 0.1316       | 0.156955556 | 1.114931871 |
| 0.255366667  | 0.327533333  | 0.156944444 | 1.114923284 |
| -0.019766667 | 0.1994       | 0.156866667 | 1.114863179 |
| 0.022566667  | 0.031033333  | 0.156622222 | 1.114674297 |
| -0.048233333 | 0.053933333  | 0.156588889 | 1.114648543 |
| 0.096333333  | 0.090566667  | 0.156544444 | 1.114614205 |
| 0.092666667  | 0.2192       | 0.156477778 | 1.1145627   |
| 0.0985       | -0.0716      | 0.156211111 | 1.114356704 |
| 0.253166667  | 0.0384       | 0.156188889 | 1.114339539 |
| 0.1311       | 0.033        | 0.156055556 | 1.114236557 |
| 0.0161       | 0.0082       | 0.155922222 | 1.114133585 |
| 0.190033333  | -0.010666667 | 0.155911111 | 1.114125004 |
| 0.302        | -0.031033333 | 0.1558      | 1.114039201 |
| -0.0321      | -0.093866667 | 0.155744444 | 1.113996303 |
| -0.035633333 | 0.015333333  | 0.155644444 | 1.113919089 |
| -0.027433333 | -0.028733333 | 0.155644444 | 1.113919089 |
| -0.004933333 | -0.080166667 | 0.155611111 | 1.113893352 |
| 0.060566667  | 0.099066667  | 0.155455556 | 1.113773256 |
| -0.004333333 | 0.049066667  | 0.1554      | 1.113730367 |
| 0.022        | 0.164933333  | 0.155355556 | 1.113696057 |
| 0.156933333  | 0.0127       | 0.155344444 | 1.11368748  |
| 0.152433333  | -0.4226      | 0.155277778 | 1.113636018 |
| 0.130033333  | 0.111533333  | 0.155266667 | 1.113627441 |
| 0.181066667  | 0.4368       | 0.155211111 | 1.113584558 |
| -0.044533333 | -0.054333333 | 0.1552      | 1.113575982 |
| 0.182966667  | 0.180433333  | 0.1552      | 1.113575982 |
| 0.164133333  | 0.052133333  | 0.155144444 | 1.113533101 |
| 0.039666667  | -0.006233333 | 0.155077778 | 1.113481646 |
| -0.060666667 | 0.080333333  | 0.155011111 | 1.113430193 |
| 0.179633333  | 0.0883       | 0.154922222 | 1.113361594 |
| -0.084766667 | -0.006966667 | 0.154788889 | 1.113258702 |
| 0.4356       | -0.049533333 | 0.154777778 | 1.113250128 |
| 0.0476       | 0.0486       | 0.154588889 | 1.113104382 |
| -0.033266667 | 0.228933333  | 0.154477778 | 1.113018658 |
| 0.002433333  | 0.122433333  | 0.154411111 | 1.112967227 |
| 0.264866667  | 0.170533333  | 0.154255556 | 1.11284723  |
| -0.042133333 | -0.182266667 | 0.154155556 | 1.112770096 |
| 0.384033333  | -0.095833333 | 0.154155556 | 1.112770096 |
| -0.115866667 | 0.027033333  | 0.154155556 | 1.112770096 |
| -0.054       | -0.220466667 | 0.154111111 | 1.112735816 |
| 0.102233333  | 0.117266667  | 0.154       | 1.112650121 |
| 0.1583       | 0.007766667  | 0.153944444 | 1.112607275 |
| 0.095933333  | 0.1634       | 0.1539      | 1.112573    |
| 0.1527       | 0.157133333  | 0.153722222 | 1.112435911 |
| 0.068233333  | 0.036566667  | 0.153711111 | 1.112427343 |

|              |              |             |             |
|--------------|--------------|-------------|-------------|
| 0.204566667  | 0.0765       | 0.153677778 | 1.112401641 |
| -0.1358      | -0.143366667 | 0.153566667 | 1.112315971 |
| 0.126633333  | -0.135866667 | 0.1534      | 1.112187479 |
| -0.171933333 | -0.006933333 | 0.153311111 | 1.112118955 |
| 0.116966667  | 0.04         | 0.1533      | 1.11211039  |
| 0.1068       | -0.086533333 | 0.153133333 | 1.111981922 |
| 0.1604       | -0.1601      | 0.153066667 | 1.111930538 |
| 0.135333333  | -0.0816      | 0.152911111 | 1.111810653 |
| 0.3361       | -0.019533333 | 0.152855556 | 1.11176784  |
| 0.119433333  | 0.1862       | 0.152788889 | 1.111716467 |
| 0.204733333  | 0.0665       | 0.152766667 | 1.111699343 |
| 0.061766667  | 0.173133333  | 0.152533333 | 1.111519558 |
| -0.101833333 | -0.030766667 | 0.1525      | 1.111493876 |
| -0.212733333 | -0.022866667 | 0.152388889 | 1.111408276 |
| -0.047866667 | 0.102633333  | 0.152144444 | 1.11121998  |
| -0.067433333 | -0.166533333 | 0.152044444 | 1.111142959 |
| 0.024633333  | 0.084866667  | 0.152011111 | 1.111117286 |
| 0.118233333  | 0.0138       | 0.151922222 | 1.111048829 |
| 0.099333333  | 0.033833333  | 0.151911111 | 1.111040272 |
| 0.320433333  | 0.054933333  | 0.151722222 | 1.110894815 |
| -0.081866667 | 0.008766667  | 0.151644444 | 1.110834927 |
| 0.2288       | 0.1725       | 0.151544444 | 1.110757933 |
| 0.055833333  | 0.1538       | 0.151533333 | 1.110749378 |
| 0.028433333  | 0.0752       | 0.151488889 | 1.11071516  |
| 0.102733333  | 0.0058       | 0.151444444 | 1.110680943 |
| 0.281933333  | 0.133333333  | 0.151388889 | 1.110638174 |
| 0.095766667  | -0.027466667 | 0.151344444 | 1.110603959 |
| 0.268933333  | 0.334266667  | 0.151144444 | 1.110450008 |
| 0.4198       | 0.021        | 0.151066667 | 1.110390143 |
| 0.149        | 0.134733333  | 0.151055556 | 1.110381592 |
| 0.2359       | -0.2306      | 0.150922222 | 1.110278975 |
| -0.015333333 | -0.070266667 | 0.150866667 | 1.110236221 |
| -0.040433333 | -0.144733333 | 0.150866667 | 1.110236221 |
| 0.033766667  | 0.1528       | 0.1508      | 1.110184919 |
| -0.038966667 | -0.100333333 | 0.150755556 | 1.110150718 |
| 0.0367       | 0.039766667  | 0.150566667 | 1.110005378 |
| 0.080133333  | 0.080433333  | 0.150488889 | 1.109945538 |
| 0.157166667  | -0.044033333 | 0.150433333 | 1.109902797 |
| 0.081166667  | -0.037666667 | 0.150333333 | 1.109825867 |
| -0.1166      | -0.0667      | 0.150033333 | 1.109595109 |
| -0.033366667 | 0.081666667  | 0.149977778 | 1.109552381 |
| -0.003066667 | 0.031        | 0.149888889 | 1.10948402  |
| 0.043033333  | 0.172066667  | 0.149844444 | 1.109449842 |
| 0.1902       | 0.1285       | 0.149844444 | 1.109449842 |
| 0.1774       | 0.263533333  | 0.149688889 | 1.109330224 |
| -0.093       | 0.070433333  | 0.149466667 | 1.109159364 |
| -0.031533333 | -0.0993      | 0.1494      | 1.109108111 |

|              |              |             |             |
|--------------|--------------|-------------|-------------|
| 0.069266667  | 0.001333333  | 0.149366667 | 1.109082485 |
| -0.0316      | -0.050166667 | 0.149255556 | 1.108997071 |
| -0.0277      | -0.0675      | 0.149144444 | 1.108911664 |
| 0.1564       | 0.164733333  | 0.149133333 | 1.108903123 |
| 0.1787       | 0.171266667  | 0.149033333 | 1.108826263 |
| -0.043366667 | -0.006333333 | 0.148977778 | 1.108783565 |
| -0.114433333 | -0.044533333 | 0.148944444 | 1.108757947 |
| -0.053833333 | -0.174766667 | 0.148877778 | 1.108706712 |
| 0.3804       | 0.0273       | 0.148755556 | 1.108612789 |
| 0.021866667  | -0.001566667 | 0.148711111 | 1.108578637 |
| 0.0991       | 0.1618       | 0.148655556 | 1.108535948 |
| 0.0262       | 0.0236       | 0.148644444 | 1.108527411 |
| 0.097966667  | 0.174366667  | 0.148622222 | 1.108510336 |
| 0.098833333  | 0.217633333  | 0.148611111 | 1.108501799 |
| 0.164766667  | 0.092666667  | 0.148555556 | 1.108459113 |
| 0.218966667  | 0.113066667  | 0.148455556 | 1.108382283 |
| -0.0169      | 0.246366667  | 0.148355556 | 1.108305459 |
| 0.075433333  | 0.142633333  | 0.148322222 | 1.108279852 |
| 0.3351       | 0.167133333  | 0.148088889 | 1.108100619 |
| 0.061633333  | 0.1355       | 0.147966667 | 1.108006747 |
| 0.1484       | 0.062166667  | 0.147755556 | 1.107844623 |
| -0.077766667 | -0.112366667 | 0.147655556 | 1.107767836 |
| 0.173666667  | -0.1627      | 0.147555556 | 1.107691054 |
| -0.145766667 | 0.0469       | 0.147377778 | 1.107554566 |
| -0.043933333 | 0.0204       | 0.147344444 | 1.107528976 |
| -0.0947      | 0.063366667  | 0.1473      | 1.107494858 |
| 0.2645       | -0.158766667 | 0.147277778 | 1.107477799 |
| 0.0261       | -0.056266667 | 0.147255556 | 1.10746074  |
| -0.138633333 | -0.0594      | 0.147166667 | 1.107392508 |
| 0.2587       | 0.2214       | 0.147155556 | 1.107383979 |
| 0.110066667  | 0.007133333  | 0.147088889 | 1.107332809 |
| -0.069166667 | -0.013733333 | 0.146966667 | 1.107239002 |
| 0.0881       | -0.1586      | 0.146888889 | 1.10717931  |
| 0.192033333  | 0.011266667  | 0.146844444 | 1.107145202 |
| -0.077966667 | 0.068066667  | 0.146788889 | 1.107102569 |
| -0.096533333 | -0.019666667 | 0.146777778 | 1.107094043 |
| 0.035033333  | 0.010066667  | 0.146755556 | 1.10707699  |
| 0.283366667  | 0.440266667  | 0.146655556 | 1.107000256 |
| -0.088633333 | 0.192133333  | 0.146655556 | 1.107000256 |
| -0.052       | 0.220533333  | 0.146622222 | 1.106974679 |
| 0.3558       | 0.224633333  | 0.146566667 | 1.106932052 |
| -0.020266667 | 0.0945       | 0.146544444 | 1.106915002 |
| 0.004333333  | 0.109133333  | 0.146533333 | 1.106906477 |
| 0.092866667  | 0.0735       | 0.146488889 | 1.106872378 |
| -0.012566667 | 0.076        | 0.1464      | 1.106804182 |
| 0.092233333  | 0.107266667  | 0.146344444 | 1.106761562 |
| -0.005933333 | -0.094166667 | 0.146244444 | 1.106684849 |

|              |              |             |             |
|--------------|--------------|-------------|-------------|
| -0.110033333 | -0.021166667 | 0.146066667 | 1.106548485 |
| 0.053833333  | 0.137033333  | 0.145966667 | 1.106471788 |
| 0.208633333  | 0.262466667  | 0.145888889 | 1.106412138 |
| 0.0285       | -0.0873      | 0.145844444 | 1.106378054 |
| 0.079633333  | 0.1949       | 0.1457      | 1.106267287 |
| 0.051        | 0.089833333  | 0.145622222 | 1.106207648 |
| 0.535766667  | 0.0071       | 0.1456      | 1.106190609 |
| 0.067666667  | 0.027666667  | 0.145377778 | 1.106020233 |
| 0.102133333  | 0.054133333  | 0.145166667 | 1.1058584   |
| -0.0491      | 0.062166667  | 0.145077778 | 1.105790266 |
| 0.1412       | 0.1546       | 0.145022222 | 1.105747685 |
| -0.117       | -0.031866667 | 0.144966667 | 1.105705106 |
| -0.040433333 | 0.068633333  | 0.144955556 | 1.10569659  |
| 0.1048       | 0.0096       | 0.144755556 | 1.105543319 |
| -0.075533333 | -0.112433333 | 0.144611111 | 1.105432636 |
| -0.0382      | 0.031033333  | 0.144533333 | 1.105373042 |
| 0.070466667  | 0.2129       | 0.144522222 | 1.105364529 |
| 0.0073       | -0.055233333 | 0.144466667 | 1.105321964 |
| 0.0813       | 0.094566667  | 0.144222222 | 1.105134699 |
| 0.134366667  | -0.146066667 | 0.144177778 | 1.105100654 |
| 0.111233333  | 0.000266667  | 0.144055556 | 1.105007036 |
| 0.2745       | 0.2562       | 0.143844444 | 1.104845351 |
| 0.259766667  | 0.0614       | 0.143722222 | 1.104751754 |
| 0.115433333  | 0.1993       | 0.143655556 | 1.104700705 |
| 0.1843       | 0.113733333  | 0.143622222 | 1.104675182 |
| 0.277866667  | 0.398533333  | 0.143555556 | 1.104624136 |
| -0.0355      | -0.150266667 | 0.143522222 | 1.104598614 |
| 0.170966667  | 0.098366667  | 0.1434      | 1.104505039 |
| 0.1614       | 0.083733333  | 0.143344444 | 1.104462507 |
| -0.221333333 | 0.052033333  | 0.142944444 | 1.104156327 |
| 0.106233333  | 0.010566667  | 0.142944444 | 1.104156327 |
| 0.2831       | 0.2136       | 0.142855556 | 1.104088299 |
| -0.011866667 | 0.054666667  | 0.142766667 | 1.104020275 |
| 0.1585       | 0.156233333  | 0.1426      | 1.103892741 |
| 0.085933333  | 0.160733333  | 0.142588889 | 1.103884239 |
| 0.0455       | 0.2597       | 0.142566667 | 1.103867236 |
| 0.172333333  | 0.151533333  | 0.1425      | 1.103816227 |
| 0.0118       | 0.088233333  | 0.142433333 | 1.103765221 |
| 0.015433333  | -0.057666667 | 0.142411111 | 1.10374822  |
| 0.2767       | -0.0392      | 0.142222222 | 1.103603718 |
| -0.032366667 | -0.0642      | 0.142211111 | 1.103595218 |
| 0.068433333  | -0.005333333 | 0.142166667 | 1.103561221 |
| 0.0142       | 0.1569       | 0.142088889 | 1.103501728 |
| -0.003833333 | -0.094733333 | 0.1419      | 1.103357258 |
| 0.024033333  | 0.017966667  | 0.141822222 | 1.103297777 |
| -0.475133333 | -0.263233333 | 0.1418      | 1.103280782 |
| 0.1726       | 0.156333333  | 0.141722222 | 1.103221304 |

|              |              |             |             |
|--------------|--------------|-------------|-------------|
| 0.125933333  | 0.0546       | 0.1417      | 1.103204311 |
| 0.1165       | 0.2494       | 0.141577778 | 1.103110854 |
| 0.144366667  | 0.008766667  | 0.141422222 | 1.10299192  |
| -0.098133333 | -0.1343      | 0.141411111 | 1.102983425 |
| 0.411133333  | 0.168933333  | 0.141366667 | 1.102949446 |
| 0.190133333  | 0.080266667  | 0.141288889 | 1.102889986 |
| 0.140533333  | 0.038933333  | 0.141255556 | 1.102864505 |
| 0.018566667  | -0.0742      | 0.141033333 | 1.10269464  |
| 0.036433333  | -0.0068      | 0.140988889 | 1.102660671 |
| -0.012666667 | 0.033233333  | 0.140977778 | 1.102652178 |
| 0.0568       | 0.028166667  | 0.140977778 | 1.102652178 |
| 0.132933333  | 0.142066667  | 0.140944444 | 1.102626702 |
| 0.2581       | 0.034433333  | 0.140777778 | 1.102499329 |
| 0.198133333  | 0.313        | 0.140544444 | 1.102321031 |
| 0.0187       | 0.007366667  | 0.140388889 | 1.102202182 |
| 0.021633333  | -0.089533333 | 0.140344444 | 1.102168228 |
| 0.1808       | 0.066866667  | 0.140333333 | 1.102159739 |
| 0.134366667  | 0.109766667  | 0.140266667 | 1.10210881  |
| 0.107233333  | 0.046366667  | 0.140211111 | 1.102066371 |
| 0.3558       | 0.2441       | 0.140177778 | 1.102040908 |
| -0.060833333 | -0.019866667 | 0.140166667 | 1.10203242  |
| 0.040333333  | 0.051333333  | 0.140133333 | 1.102006958 |
| -0.078933333 | -0.018566667 | 0.140066667 | 1.101956036 |
| 0.0067       | 0.1208       | 0.139966667 | 1.101879657 |
| -0.117166667 | 0.053633333  | 0.139955556 | 1.101871171 |
| 0.0217       | 0.0133       | 0.139766667 | 1.101726914 |
| 0.1946       | 0.168933333  | 0.139744444 | 1.101709944 |
| 0.166433333  | 0.035133333  | 0.1397      | 1.101676005 |
| -0.072733333 | -0.042133333 | 0.139588889 | 1.101591161 |
| 0.363033333  | 0.082766667  | 0.139455556 | 1.101489357 |
| -0.112733333 | -0.176133333 | 0.139433333 | 1.101472391 |
| 0.1611       | 0.1248       | 0.139377778 | 1.101429976 |
| 0.1039       | 0.0405       | 0.139322222 | 1.101387563 |
| 0.123833333  | -0.006133333 | 0.139255556 | 1.101336669 |
| -0.1187      | -0.0885      | 0.139155556 | 1.101260333 |
| 0.010633333  | -0.099966667 | 0.139144444 | 1.101251851 |
| 0.050833333  | -0.007       | 0.138988889 | 1.101133118 |
| 0.0518       | 0.051166667  | 0.138966667 | 1.101116157 |
| 0.128166667  | 0.1262       | 0.138944444 | 1.101099196 |
| 0.129933333  | 0.137933333  | 0.1388      | 1.100988958 |
| 0.019466667  | 0.021733333  | 0.138711111 | 1.100921125 |
| 0.030666667  | -0.015266667 | 0.1387      | 1.100912646 |
| -0.104333333 | -0.029466667 | 0.138533333 | 1.100785471 |
| 0.011733333  | 0.0491       | 0.138266667 | 1.100582021 |
| 0.1841       | -0.0374      | 0.1382      | 1.100531165 |
| -0.0461      | 0.3125       | 0.137855556 | 1.100268444 |
| -0.133433333 | 0.054        | 0.137833333 | 1.100251496 |



|              |              |             |             |
|--------------|--------------|-------------|-------------|
| 0.0744       | 0.060133333  | 0.137766667 | 1.100200655 |
| 0.118733333  | 0.260066667  | 0.137766667 | 1.100200655 |
| 0.1112       | -0.1256      | 0.137755556 | 1.100192181 |
| 0.194633333  | 0.028833333  | 0.137677778 | 1.10013287  |
| 0.007433333  | 0.0611       | 0.137666667 | 1.100124397 |
| -0.0376      | 0.001233333  | 0.137611111 | 1.100082034 |
| 0.020033333  | 0.013533333  | 0.137544444 | 1.100031201 |
| 0.262533333  | 0.019633333  | 0.137433333 | 1.099946484 |
| 0.157866667  | 0.261533333  | 0.137422222 | 1.099938012 |
| 0.018966667  | 0.069033333  | 0.137366667 | 1.099895657 |
| 0.246533333  | 0.068433333  | 0.137355556 | 1.099887186 |
| 0.293566667  | 0.297333333  | 0.137233333 | 1.099794009 |
| -0.057766667 | -0.0955      | 0.137044444 | 1.099650025 |
| -0.0051      | -0.0258      | 0.137022222 | 1.099633087 |
| 0.014166667  | -0.052       | 0.136922222 | 1.099556869 |
| -0.007066667 | -0.2631      | 0.136922222 | 1.099556869 |
| -0.071566667 | -0.045833333 | 0.136911111 | 1.099548401 |
| 0.166666667  | 0.181266667  | 0.136888889 | 1.099531464 |
| 0.165733333  | 0.1353       | 0.136855556 | 1.09950606  |
| -0.057466667 | 0.101633333  | 0.136833333 | 1.099489124 |
| 0.219333333  | 0.1925       | 0.136822222 | 1.099480656 |
| -0.006       | -0.092033333 | 0.136722222 | 1.099404449 |
| 0.1533       | 0.205066667  | 0.1367      | 1.099387514 |
| 0.0218       | -0.006766667 | 0.136677778 | 1.09937058  |
| -0.113466667 | -0.104166667 | 0.136566667 | 1.099285914 |
| 0.155033333  | 0.015066667  | 0.136533333 | 1.099260515 |
| 0.011766667  | -0.084466667 | 0.136455556 | 1.099201254 |
| 0.1913       | 0.2182       | 0.1364      | 1.099158927 |
| 0.230533333  | 0.225066667  | 0.136355556 | 1.099125066 |
| 0.150466667  | 0.1804       | 0.136211111 | 1.099015026 |
| -0.216266667 | -0.0597      | 0.136033333 | 1.098879607 |
| 0.065666667  | -0.128533333 | 0.135966667 | 1.098828829 |
| 0.006333333  | 0.034666667  | 0.135911111 | 1.098786516 |
| -0.064633333 | -0.072533333 | 0.1359      | 1.098778053 |
| 0.0972       | 0.107033333  | 0.135877778 | 1.098761129 |
| 0.118233333  | 0.2459       | 0.135866667 | 1.098752667 |
| 0.063466667  | 0.154733333  | 0.135822222 | 1.098718818 |
| -0.0393      | -0.007533333 | 0.135644444 | 1.098583436 |
| 0.3858       | 0.144866667  | 0.135555556 | 1.098515751 |
| 0.132133333  | 0.136666667  | 0.135533333 | 1.09849883  |
| -0.0494      | 0.113066667  | 0.135444444 | 1.09843115  |
| -0.116433333 | -0.128833333 | 0.135433333 | 1.098422691 |
| -0.064633333 | 0.061533333  | 0.135411111 | 1.098405771 |
| 0.0736       | 0.2178       | 0.135288889 | 1.098312721 |
| -0.0701      | -0.12        | 0.135288889 | 1.098312721 |
| 0.076933333  | 0.1941       | 0.135288889 | 1.098312721 |
| -0.008233333 | 0.091433333  | 0.135211111 | 1.098253511 |

|              |              |             |             |
|--------------|--------------|-------------|-------------|
| -0.070566667 | 0.024233333  | 0.135177778 | 1.098228136 |
| 0.049833333  | -0.1992      | 0.135155556 | 1.09821122  |
| -0.1084      | -0.0565      | 0.134877778 | 1.09799979  |
| 0.260066667  | 0.157033333  | 0.134855556 | 1.097982877 |
| 0.034233333  | 0.321466667  | 0.134844444 | 1.097974421 |
| 0.0266       | 0.009        | 0.134844444 | 1.097974421 |
| 0.113066667  | 0.060433333  | 0.134833333 | 1.097965964 |
| 0.055733333  | -0.1009      | 0.134788889 | 1.09793214  |
| 0.002033333  | -0.026766667 | 0.134711111 | 1.097872951 |
| -0.050466667 | 0.040333333  | 0.134666667 | 1.09783913  |
| -0.014033333 | 0.007866667  | 0.134488889 | 1.097703856 |
| 0.0658       | 0.0398       | 0.134166667 | 1.097458714 |
| 0.035566667  | -0.0096      | 0.134088889 | 1.09739955  |
| 0.2888       | 0.141        | 0.134066667 | 1.097382646 |
| -0.059566667 | -0.113166667 | 0.134033333 | 1.097357292 |
| 0.059866667  | -0.0884      | 0.133955556 | 1.097298133 |
| -0.008266667 | 0.082766667  | 0.133677778 | 1.097086879 |
| 0.263466667  | 0.297066667  | 0.133644444 | 1.097061531 |
| 0.0963       | 0.207166667  | 0.133555556 | 1.09699394  |
| 0.055066667  | 0.1669       | 0.133533333 | 1.096977042 |
| 0.146066667  | 0.2198       | 0.133377778 | 1.09685877  |
| 0.0491       | -0.198166667 | 0.133144444 | 1.096681384 |
| -0.0244      | 0.122566667  | 0.133122222 | 1.096664492 |
| -0.092966667 | -0.073033333 | 0.1331      | 1.0966476   |
| 0.142933333  | 0            | 0.133044444 | 1.096605371 |
| 0.0336       | 0.132733333  | 0.132988889 | 1.096563143 |
| 0.135033333  | 0.037833333  | 0.132955556 | 1.096537808 |
| -0.0197      | 0.002466667  | 0.132955556 | 1.096537808 |
| -0.0464      | 0.0598       | 0.132777778 | 1.096402694 |
| 0.045933333  | 0.087733333  | 0.1327      | 1.096343587 |
| 0.2418       | 0.284133333  | 0.132666667 | 1.096318256 |
| 0.0303       | -0.068133333 | 0.132666667 | 1.096318256 |
| 0.066133333  | 0.049033333  | 0.132533333 | 1.096216939 |
| 0.054566667  | 0.2393       | 0.132522222 | 1.096208497 |
| -0.017866667 | -0.089833333 | 0.132466667 | 1.096166285 |
| 0.175033333  | 0.033        | 0.132411111 | 1.096124074 |
| 0.144266667  | 0.100133333  | 0.1324      | 1.096115632 |
| -0.0431      | -0.0651      | 0.132377778 | 1.096098748 |
| -0.190466667 | -0.002533333 | 0.132155556 | 1.095929926 |
| 0.0442       | -0.0384      | 0.132133333 | 1.095913046 |
| 0.109933333  | 0.197533333  | 0.132077778 | 1.095870845 |
| 0.0226       | 0.009133333  | 0.132       | 1.095811766 |
| -0.1664      | -0.0103      | 0.131988889 | 1.095803327 |
| 0.1057       | 0.047433333  | 0.131911111 | 1.095744252 |
| -0.055633333 | 0.0121       | 0.131855556 | 1.095702058 |
| 0.226266667  | 0.081133333  | 0.131844444 | 1.095693619 |
| 0.1875       | 0.279266667  | 0.131744444 | 1.095617674 |

|              |              |             |             |
|--------------|--------------|-------------|-------------|
| 0.0247       | -0.126633333 | 0.131722222 | 1.095600798 |
| 0.309166667  | -0.1073      | 0.131688889 | 1.095575485 |
| 0.0355       | 0.1284       | 0.131688889 | 1.095575485 |
| 0.086366667  | 0.1334       | 0.131577778 | 1.095491111 |
| 0.034366667  | 0.013833333  | 0.131566667 | 1.095482674 |
| 0.155        | 0.128633333  | 0.1315      | 1.095432053 |
| 0.1537       | 0.1303       | 0.131411111 | 1.095364562 |
| -0.053933333 | 0.0985       | 0.131366667 | 1.095330818 |
| 0.081233333  | -0.0886      | 0.131266667 | 1.095254898 |
| 0.155366667  | 0.0781       | 0.131222222 | 1.095221158 |
| 0.088366667  | -0.0664      | 0.131122222 | 1.095145245 |
| 0.167566667  | 0.1126       | 0.131077778 | 1.095111508 |
| 0.2737       | 0.1866       | 0.131055556 | 1.09509464  |
| 0.103133333  | 0.041066667  | 0.130855556 | 1.094942838 |
| -0.1959      | -0.353766667 | 0.130744444 | 1.094858513 |
| -0.037366667 | 0.1128       | 0.130711111 | 1.094833217 |
| -0.050433333 | 0.008        | 0.130622222 | 1.094765763 |
| 0.382233333  | -0.1249      | 0.130566667 | 1.094723606 |
| 0.105266667  | 0.229833333  | 0.130555556 | 1.094715175 |
| 0.0559       | 0.033733333  | 0.130455556 | 1.094639298 |
| 0.071833333  | 0.094533333  | 0.130322222 | 1.094538136 |
| 0.013733333  | 0.1238       | 0.1302      | 1.094445413 |
| 0.052        | -0.072966667 | 0.130166667 | 1.094420126 |
| 0.189033333  | -0.030766667 | 0.130166667 | 1.094420126 |
| 0.165666667  | 0.1767       | 0.130155556 | 1.094411698 |
| 0.1093       | 0.193266667  | 0.130155556 | 1.094411698 |
| 0.021033333  | -0.258       | 0.130033333 | 1.094318985 |
| -0.026566667 | -0.0686      | 0.130033333 | 1.094318985 |
| 0.195833333  | 0.309766667  | 0.129844444 | 1.094175718 |
| 0.022633333  | -0.027733333 | 0.1297      | 1.094066173 |
| 0.159166667  | 0.0067       | 0.129666667 | 1.094040895 |
| -0.028533333 | -0.028066667 | 0.129622222 | 1.094007192 |
| 0.110933333  | 0.227233333  | 0.129588889 | 1.093981915 |
| 0.191        | -0.049       | 0.129533333 | 1.093939789 |
| 0.194966667  | 0.099133333  | 0.129488889 | 1.093906089 |
| 0.0702       | -0.094566667 | 0.1294      | 1.093838692 |
| 0.004666667  | 0.035966667  | 0.129377778 | 1.093821843 |
| 0.332166667  | 0.2017       | 0.129322222 | 1.093779723 |
| 0.007766667  | -0.160066667 | 0.129322222 | 1.093779723 |
| 0.3613       | 0.3199       | 0.129255556 | 1.093729181 |
| 0.0332       | -0.046633333 | 0.129133333 | 1.093636526 |
| 0.022533333  | 0.0225       | 0.129122222 | 1.093628104 |
| 0.103433333  | 0.034        | 0.129022222 | 1.093552302 |
| 0.167433333  | -0.1409      | 0.128911111 | 1.093468083 |
| -0.176466667 | 0.0546       | 0.128888889 | 1.093451241 |
| 0.139233333  | 0.0715       | 0.128577778 | 1.093215468 |
| 0.0276       | 0.0882       | 0.128533333 | 1.09318179  |

|              |              |             |             |
|--------------|--------------|-------------|-------------|
| 0.072233333  | 0.1176       | 0.128411111 | 1.093089182 |
| -0.130433333 | -0.235033333 | 0.128388889 | 1.093072345 |
| 0.022033333  | -0.0486      | 0.128366667 | 1.093055508 |
| 0.136766667  | 0.143866667  | 0.128322222 | 1.093021835 |
| 0.085133333  | -0.0132      | 0.128311111 | 1.093013417 |
| 0.3006       | 0.0819       | 0.128222222 | 1.092946076 |
| -0.0655      | -0.015133333 | 0.128177778 | 1.092912406 |
| 0.022433333  | -0.076633333 | 0.128       | 1.092777739 |
| -0.133266667 | 0.0489       | 0.127955556 | 1.092744075 |
| 0.076833333  | -0.378933333 | 0.127944444 | 1.092735659 |
| 0.060733333  | 0.055766667  | 0.127844444 | 1.092659919 |
| 0.034966667  | 0.068833333  | 0.127766667 | 1.092601014 |
| -0.130833333 | 0.0025       | 0.127688889 | 1.092542112 |
| -0.028633333 | 0.081966667  | 0.127566667 | 1.092449558 |
| 0.0295       | 0.298166667  | 0.127555556 | 1.092441144 |
| 0.212566667  | 0.037        | 0.127433333 | 1.092348598 |
| 0.020166667  | 0.131866667  | 0.127377778 | 1.092306535 |
| 0.2823       | 0.0332       | 0.127244444 | 1.092205589 |
| 0.097366667  | 0.106233333  | 0.127211111 | 1.092180354 |
| 0.035133333  | 0.130466667  | 0.127144444 | 1.092129886 |
| 0.063533333  | 0.019133333  | 0.127055556 | 1.092062598 |
| 0.165433333  | -0.278633333 | 0.126744444 | 1.091827125 |
| -0.1867      | -0.012766667 | 0.126677778 | 1.091776673 |
| 0.0809       | 0.116333333  | 0.1266      | 1.091717815 |
| -0.016233333 | 0.107733333  | 0.126588889 | 1.091709407 |
| 0.1205       | -0.026433333 | 0.126555556 | 1.091684184 |
| 0.0205       | -0.010866667 | 0.126466667 | 1.091616924 |
| 0.154466667  | 0.035533333  | 0.1264      | 1.091566482 |
| -0.008866667 | 0.1332       | 0.126333333 | 1.091516042 |
| 0.132166667  | 0.095        | 0.126255556 | 1.091457198 |
| 0.096766667  | -0.016333333 | 0.126244444 | 1.091448792 |
| 0.098033333  | 0.037766667  | 0.1262      | 1.091415169 |
| -0.159466667 | -0.093866667 | 0.126111111 | 1.091347925 |
| 0.013666667  | 0.0954       | 0.126011111 | 1.091272282 |
| -0.083066667 | 0.101266667  | 0.125988889 | 1.091255473 |
| 0.151566667  | -0.0288      | 0.125888889 | 1.091179835 |
| 0.0016       | 0.030566667  | 0.125833333 | 1.091137817 |
| 0.238866667  | 0.1557       | 0.125822222 | 1.091129413 |
| 0.1748       | 0.095933333  | 0.125777778 | 1.0910958   |
| 0.054766667  | 0.1447       | 0.125744444 | 1.09107059  |
| -0.0367      | 0.049466667  | 0.125666667 | 1.091011771 |
| 0.127266667  | -0.150066667 | 0.125633333 | 1.090986563 |
| -0.105966667 | -0.1042      | 0.125611111 | 1.090969759 |
| -0.2575      | 0.041166667  | 0.125422222 | 1.09082693  |
| 0.0222       | 0.155833333  | 0.125422222 | 1.09082693  |
| -0.0218      | -0.084766667 | 0.125355556 | 1.090776524 |
| 0.123066667  | -0.085766667 | 0.125344444 | 1.090768123 |

|              |              |             |             |
|--------------|--------------|-------------|-------------|
| -0.001366667 | 0.0412       | 0.125311111 | 1.090742921 |
| 0.2002       | 0.2014       | 0.1253      | 1.090734521 |
| 0.3342       | 0.017166667  | 0.125088889 | 1.090574924 |
| 0.054266667  | -0.048366667 | 0.124722222 | 1.090297786 |
| 0.206266667  | 0.117566667  | 0.124633333 | 1.090230611 |
| 0.128366667  | 0.1299       | 0.124611111 | 1.090213818 |
| 0.0294       | -0.011466667 | 0.1242      | 1.089903194 |
| -0.209633333 | -0.0957      | 0.124133333 | 1.089852831 |
| 0.039966667  | 0.1116       | 0.124055556 | 1.089794077 |
| 0.044233333  | 0.1396       | 0.123811111 | 1.089609443 |
| -0.022633333 | 0.035633333  | 0.1238      | 1.089601051 |
| 0.031266667  | 0.145933333  | 0.123733333 | 1.089550702 |
| 0.291833333  | 0.0802       | 0.123655556 | 1.089491964 |
| 0.0446       | 0.0838       | 0.123644444 | 1.089483573 |
| 0.042733333  | 0.104866667  | 0.123266667 | 1.089198323 |
| -0.09        | 0.198766667  | 0.123222222 | 1.089164769 |
| -0.051633333 | 0.171        | 0.123211111 | 1.089156381 |
| 0.0616       | 0.1305       | 0.1232      | 1.089147993 |
| 0.277266667  | 0.149166667  | 0.123188889 | 1.089139605 |
| 0.0688       | 0.115366667  | 0.122955556 | 1.088963468 |
| 0.206766667  | 0.0869       | 0.122888889 | 1.088913148 |
| 0.0624       | 0.093966667  | 0.122866667 | 1.088896375 |
| 0.083366667  | 0.007166667  | 0.122855556 | 1.088887989 |
| -0.245866667 | 0.1691       | 0.122755556 | 1.088812516 |
| 0.1299       | 0.025133333  | 0.122533333 | 1.088644816 |
| -0.019666667 | -0.0487      | 0.122444444 | 1.088577743 |
| 0.147666667  | 0.141366667  | 0.122422222 | 1.088560976 |
| 0.045866667  | 0.087666667  | 0.122422222 | 1.088560976 |
| 0.225466667  | 0.2127       | 0.1224      | 1.088544208 |
| 0.085533333  | -0.130966667 | 0.122377778 | 1.088527441 |
| 0.145633333  | -0.022266667 | 0.122244444 | 1.088426845 |
| 0.2612       | -0.1173      | 0.122211111 | 1.088401697 |
| 0.098366667  | 0.085066667  | 0.122166667 | 1.088368168 |
| 0.1881       | 0.018133333  | 0.122122222 | 1.088334639 |
| 0.027866667  | 0.141433333  | 0.122111111 | 1.088326257 |
| 0.0592       | 0.103933333  | 0.122088889 | 1.088309494 |
| -0.172366667 | 0.0665       | 0.121955556 | 1.088208917 |
| 0.1804       | 0.013433333  | 0.121944444 | 1.088200536 |
| -0.137766667 | 0.154233333  | 0.121911111 | 1.088175394 |
| 0.022466667  | -0.0333      | 0.121666667 | 1.087991033 |
| 0.098133333  | 0.0589       | 0.121633333 | 1.087965896 |
| 0.080833333  | -0.096233333 | 0.121511111 | 1.087873729 |
| 0.2929       | -0.5642      | 0.121455556 | 1.087831838 |
| -0.059666667 | 0.180166667  | 0.121455556 | 1.087831838 |
| -0.037033333 | -0.019933333 | 0.121388889 | 1.087781571 |
| 0.105533333  | 0.148633333  | 0.121144444 | 1.087597277 |
| 0.172933333  | 0.043466667  | 0.121133333 | 1.087588901 |

|              |              |             |             |
|--------------|--------------|-------------|-------------|
| -0.036166667 | -0.026266667 | 0.121044444 | 1.087521893 |
| 0.020966667  | -0.1107      | 0.120922222 | 1.087429764 |
| -0.092       | -0.0596      | 0.120911111 | 1.087421389 |
| 0.079233333  | 0.0622       | 0.120866667 | 1.08738789  |
| 0.11         | 0.018966667  | 0.1208      | 1.087337643 |
| 0.103533333  | 0.056466667  | 0.120755556 | 1.087304147 |
| 0.101066667  | -0.412466667 | 0.120688889 | 1.087253904 |
| 0.236833333  | -0.013366667 | 0.120433333 | 1.087061327 |
| 0.000433333  | 0.072533333  | 0.120422222 | 1.087052955 |
| -0.016366667 | -0.155866667 | 0.120422222 | 1.087052955 |
| 0.043266667  | 0.115033333  | 0.120377778 | 1.087019467 |
| 0.174133333  | 0.175633333  | 0.120311111 | 1.086969238 |
| -0.126933333 | 0.025066667  | 0.120244444 | 1.08691901  |
| -0.0554      | -0.1643      | 0.120088889 | 1.086801822 |
| -0.094366667 | -0.040633333 | 0.119988889 | 1.086726493 |
| 0.059233333  | -0.1014      | 0.119988889 | 1.086726493 |
| 0.045266667  | 0.033533333  | 0.119977778 | 1.086718123 |
| 0.125566667  | -0.2213      | 0.119966667 | 1.086709754 |
| 0.011333333  | 0.0471       | 0.119877778 | 1.0866428   |
| -0.010466667 | 0.1763       | 0.119833333 | 1.086609325 |
| 0.0494       | 0.1483       | 0.1198      | 1.08658422  |
| 0.061033333  | 0.118733333  | 0.119788889 | 1.086575851 |
| 0.1173       | 0.025033333  | 0.119766667 | 1.086559114 |
| 0.080766667  | 0.223033333  | 0.119633333 | 1.0864587   |
| -0.117333333 | 0.1243       | 0.119477778 | 1.086341561 |
| 0.109533333  | 0.1943       | 0.119477778 | 1.086341561 |
| 0.184533333  | 0.259166667  | 0.119455556 | 1.086324828 |
| 0.064966667  | 0.127366667  | 0.119344444 | 1.086241166 |
| 0.154833333  | 0.103466667  | 0.119277778 | 1.086190972 |
| 0.268833333  | 0.1349       | 0.119277778 | 1.086190972 |
| 0.247533333  | 0.079533333  | 0.119255556 | 1.086174242 |
| 0.0392       | 0.372533333  | 0.119166667 | 1.086107321 |
| 0.029566667  | 0.0271       | 0.119022222 | 1.085998584 |
| 0.219966667  | 0.1691       | 0.119011111 | 1.08599022  |
| -0.0387      | 0.2273       | 0.118933333 | 1.085931674 |
| -0.196866667 | -0.1264      | 0.118888889 | 1.085898221 |
| -0.0538      | 0.187233333  | 0.118822222 | 1.085848043 |
| 0.143733333  | 0.206766667  | 0.118733333 | 1.085781143 |
| 0.0274       | 0.5363       | 0.118688889 | 1.085747694 |
| 0.030233333  | -0.0387      | 0.118677778 | 1.085739332 |
| 0.0472       | -0.075566667 | 0.118633333 | 1.085705885 |
| 0.406        | -0.063       | 0.118622222 | 1.085697523 |
| 0.0696       | 0.0331       | 0.118488889 | 1.085597188 |
| 0.1307       | 0.225966667  | 0.118355556 | 1.085496862 |
| 0.1795       | 0.0159       | 0.118288889 | 1.085446703 |
| 0.252833333  | 0.124866667  | 0.118255556 | 1.085421624 |
| 0.090466667  | 0.0214       | 0.1182      | 1.085379827 |

|              |              |             |             |
|--------------|--------------|-------------|-------------|
| 0.108166667  | 0.08         | 0.118088889 | 1.085296238 |
| 0.0554       | -0.0296      | 0.118077778 | 1.08528788  |
| 0.082766667  | 0.155633333  | 0.118055556 | 1.085271163 |
| -0.087166667 | -0.116066667 | 0.117922222 | 1.085170867 |
| -0.181333333 | 0.0162       | 0.117788889 | 1.085070581 |
| 0.100566667  | 0.019133333  | 0.117666667 | 1.08497866  |
| 0.165866667  | 0.181166667  | 0.117622222 | 1.084945236 |
| 0.0377       | 0.021833333  | 0.117555556 | 1.084895102 |
| 0.0127       | -0.0879      | 0.117388889 | 1.084769777 |
| 0.026466667  | 0.108333333  | 0.117366667 | 1.084753068 |
| -0.0004      | 0.141833333  | 0.117333333 | 1.084728005 |
| 0.122        | 0.0121       | 0.117255556 | 1.084669528 |
| -0.079433333 | 0.019266667  | 0.117255556 | 1.084669528 |
| 0.1174       | -0.111533333 | 0.117222222 | 1.084644467 |
| 0.166233333  | 0.125766667  | 0.117211111 | 1.084636113 |
| -0.032133333 | 0.2768       | 0.117144444 | 1.084585994 |
| 0.100833333  | 0.0925       | 0.117088889 | 1.084544229 |
| 0.024666667  | 0.026533333  | 0.117055556 | 1.084519171 |
| 0.2737       | 0.103333333  | 0.117022222 | 1.084494113 |
| -0.092733333 | -0.100666667 | 0.116966667 | 1.084452352 |
| 0.178366667  | 0.0015       | 0.116933333 | 1.084427297 |
| 0.311966667  | -0.064       | 0.116855556 | 1.084368835 |
| 0.2851       | -0.0925      | 0.116722222 | 1.084268623 |
| -0.035633333 | 0.189        | 0.116611111 | 1.08418512  |
| 0.139033333  | 0.175033333  | 0.116611111 | 1.08418512  |
| 0.0052       | 0.0471       | 0.116388889 | 1.084018132 |
| 0.078766667  | -0.045166667 | 0.116366667 | 1.084001435 |
| 0.064133333  | 0.1962       | 0.116366667 | 1.084001435 |
| 0.038333333  | 0.145133333  | 0.116311111 | 1.083959693 |
| 0.0586       | 0.036366667  | 0.116244444 | 1.083909605 |
| -0.002333333 | 0.023766667  | 0.116222222 | 1.083892909 |
| 0.097033333  | 0.100966667  | 0.116211111 | 1.083884561 |
| -0.127733333 | 0.010366667  | 0.116122222 | 1.083817782 |
| -0.05        | -0.038066667 | 0.1161      | 1.083801088 |
| 0.019566667  | -0.121766667 | 0.115911111 | 1.083659197 |
| 0.2039       | 0.0313       | 0.115888889 | 1.083642505 |
| 0.190333333  | 0.147966667  | 0.115766667 | 1.083550705 |
| -0.001866667 | 0.072366667  | 0.115711111 | 1.083508981 |
| 0.076033333  | 0.064766667  | 0.115688889 | 1.083492291 |
| -0.027533333 | 0.043833333  | 0.115444444 | 1.083308724 |
| 0.056166667  | 0.1178       | 0.1154      | 1.083275352 |
| -0.173966667 | -0.184766667 | 0.115366667 | 1.083250323 |
| -0.0297      | 0.092466667  | 0.115188889 | 1.083116846 |
| 0.090966667  | 0.199766667  | 0.115144444 | 1.08308348  |
| 0.080266667  | -0.005366667 | 0.115133333 | 1.083075138 |
| 0.113066667  | 0.0873       | 0.115033333 | 1.083000068 |
| 0.1322       | 0.177066667  | 0.115011111 | 1.082983386 |

|              |              |             |             |
|--------------|--------------|-------------|-------------|
| -0.0417      | 0.003933333  | 0.114911111 | 1.082908322 |
| -0.121833333 | -0.1204      | 0.114755556 | 1.082791566 |
| 0.008633333  | 0.054666667  | 0.114655556 | 1.082716515 |
| -0.020066667 | -0.044433333 | 0.114488889 | 1.082591442 |
| 0.3161       | 0.2263       | 0.114477778 | 1.082583105 |
| 0.2344       | 0.1157       | 0.114466667 | 1.082574767 |
| -0.056633333 | 0.191366667  | 0.114355556 | 1.082491394 |
| -0.012533333 | -0.0042      | 0.114344444 | 1.082483057 |
| 0.021966667  | -0.084066667 | 0.1143      | 1.08244971  |
| 0.228133333  | 0.0797       | 0.114277778 | 1.082433037 |
| 0.019433333  | -0.0096      | 0.114155556 | 1.082341339 |
| 0.129        | -0.037033333 | 0.114055556 | 1.08226632  |
| 0.144666667  | 0.1603       | 0.114       | 1.082224645 |
| 0.119133333  | 0.180733333  | 0.113966667 | 1.08219964  |
| -0.0249      | 0.026966667  | 0.113922222 | 1.082166302 |
| 0.0155       | -0.062166667 | 0.113911111 | 1.082157967 |
| 0.5044       | 0.515833333  | 0.113844444 | 1.082107962 |
| 0.024933333  | 0.156533333  | 0.113811111 | 1.082082961 |
| 0.395633333  | 0.119766667  | 0.1138      | 1.082074627 |
| 0.173033333  | -0.003166667 | 0.113744444 | 1.082032959 |
| 0.091466667  | 0.003233333  | 0.113688889 | 1.081991292 |
| 0.274433333  | 0.130533333  | 0.113677778 | 1.081982959 |
| -0.083066667 | 0.123733333  | 0.1136      | 1.08192463  |
| 0.100966667  | 0.046733333  | 0.113555556 | 1.0818913   |
| 0.211966667  | 0.208833333  | 0.113322222 | 1.081716335 |
| 0.0115       | -0.094366667 | 0.113322222 | 1.081716335 |
| 0.0113       | 0.037766667  | 0.1133      | 1.081699673 |
| 0.016266667  | 0.080833333  | 0.113277778 | 1.081683012 |
| 0.078066667  | 0.0615       | 0.113255556 | 1.08166635  |
| 0.128433333  | 0.3177       | 0.113244444 | 1.08165802  |
| 0.1555       | -0.032866667 | 0.113222222 | 1.081641359 |
| 0.193        | 0.201566667  | 0.113077778 | 1.081533069 |
| -0.054633333 | 0.1161       | 0.112811111 | 1.081333178 |
| 0.212566667  | 0.132866667  | 0.112644444 | 1.081208264 |
| 0.1703       | 0.185733333  | 0.112511111 | 1.081108344 |
| 0.325133333  | 0.024033333  | 0.112433333 | 1.081050062 |
| 0.053533333  | -0.0519      | 0.112422222 | 1.081041736 |
| -0.001166667 | -0.132266667 | 0.112366667 | 1.081000108 |
| 0.069833333  | 0.008033333  | 0.112355556 | 1.080991782 |
| 0.038266667  | 0.071633333  | 0.112244444 | 1.080908531 |
| 0.206233333  | 0.341933333  | 0.112077778 | 1.080783667 |
| -0.022833333 | 0.005533333  | 0.111933333 | 1.080675463 |
| 0.1468       | 0.008433333  | 0.111844444 | 1.080608881 |
| 0.0339       | 0.1413       | 0.111833333 | 1.080600559 |
| 0.0608       | -0.0221      | 0.111811111 | 1.080583914 |
| -0.019033333 | -0.052066667 | 0.111788889 | 1.08056727  |
| 0.103533333  | 0.2328       | 0.111644444 | 1.080459088 |



|              |              |             |             |
|--------------|--------------|-------------|-------------|
| 0.087533333  | -0.013133333 | 0.111511111 | 1.080359237 |
| -0.253533333 | -0.012066667 | 0.111477778 | 1.080334275 |
| -0.006733333 | 0.0889       | 0.111466667 | 1.080325955 |
| 0.195466667  | 0.255        | 0.111444444 | 1.080309315 |
| 0.220366667  | -0.0183      | 0.1114      | 1.080276034 |
| 0.226833333  | -0.086666667 | 0.1114      | 1.080276034 |
| -0.1469      | 0.094866667  | 0.1112      | 1.080126287 |
| 0.0058       | 0.0028       | 0.1112      | 1.080126287 |
| -0.085233333 | 0.032133333  | 0.111166667 | 1.080101331 |
| -0.001166667 | 0.024066667  | 0.111066667 | 1.080026466 |
| 0.189333333  | 0.1348       | 0.111055556 | 1.080018149 |
| 0.139166667  | 0.296633333  | 0.111044444 | 1.080009831 |
| -0.045866667 | 0.083066667  | 0.111011111 | 1.079984877 |
| 0.071033333  | 0.034066667  | 0.111       | 1.07997656  |
| 0.001633333  | -0.018666667 | 0.110966667 | 1.079951607 |
| -0.085833333 | 0.1077       | 0.110966667 | 1.079951607 |
| 0.0176       | -0.425966667 | 0.110944444 | 1.079934973 |
| 0.065933333  | 0.115866667  | 0.110944444 | 1.079934973 |
| -0.0022      | 0.1454       | 0.110877778 | 1.07988507  |
| -0.005266667 | -0.013633333 | 0.110855556 | 1.079868437 |
| -0.020033333 | -0.030766667 | 0.110822222 | 1.079843487 |
| 0.259333333  | 0.077066667  | 0.110811111 | 1.07983517  |
| 0.0829       | 0.1512       | 0.110655556 | 1.079718745 |
| -0.0279      | 0.107933333  | 0.110644444 | 1.07971043  |
| -0.001033333 | -0.107633333 | 0.110611111 | 1.079685484 |
| 0.196133333  | 0.0483       | 0.110555556 | 1.079643908 |
| 0.140766667  | 0.1067       | 0.110511111 | 1.079610648 |
| -0.078333333 | -0.2546      | 0.110433333 | 1.079552446 |
| 0.112533333  | -0.092333333 | 0.110377778 | 1.079510875 |
| -0.1604      | -0.074066667 | 0.110311111 | 1.079460993 |
| 0.159766667  | 0.0138       | 0.110255556 | 1.079419425 |
| -0.0378      | 0.2474       | 0.110222222 | 1.079394486 |
| 0.139133333  | 0.1519       | 0.1101      | 1.079303045 |
| 0.184766667  | 0.125966667  | 0.110033333 | 1.079253172 |
| 0.1814       | 0.052966667  | 0.109988889 | 1.079219925 |
| 0.113533333  | 0.052433333  | 0.109833333 | 1.079103566 |
| 0.2178       | 0.247466667  | 0.109733333 | 1.079028771 |
| 0.035366667  | 0.137333333  | 0.109577778 | 1.078912433 |
| 0.019333333  | 0.022566667  | 0.109544444 | 1.078887506 |
| -0.0657      | 0.058566667  | 0.109477778 | 1.078837652 |
| 0.1037       | 0.110466667  | 0.109466667 | 1.078829343 |
| -0.051733333 | 0.004633333  | 0.109466667 | 1.078829343 |
| -0.076766667 | -0.007333333 | 0.109277778 | 1.078688103 |
| 0.046533333  | 0.079333333  | 0.1092      | 1.078629951 |
| -0.045333333 | -0.145866667 | 0.109133333 | 1.078580109 |
| -0.093733333 | 0.057433333  | 0.109111111 | 1.078563496 |
| -0.007233333 | -0.1417      | 0.109044444 | 1.078513656 |

|              |              |             |             |
|--------------|--------------|-------------|-------------|
| -0.096066667 | -0.136166667 | 0.108844444 | 1.078364153 |
| 0.141133333  | 0.193933333  | 0.108744444 | 1.078289409 |
| -0.046       | 0.012266667  | 0.108611111 | 1.078189759 |
| 0.231733333  | 0.026466667  | 0.1086      | 1.078181455 |
| 0.1445       | 0.006766667  | 0.108533333 | 1.078131633 |
| 0.334666667  | 0.1812       | 0.108511111 | 1.078115027 |
| 0.020433333  | 0.022533333  | 0.108255556 | 1.077924069 |
| 0.116066667  | -0.054666667 | 0.1082      | 1.077882561 |
| 0.117533333  | 0.143433333  | 0.108055556 | 1.077774647 |
| 0.247266667  | 0.009866667  | 0.108033333 | 1.077758046 |
| 0.051733333  | 0.085166667  | 0.107911111 | 1.077666745 |
| 0.066566667  | 0.123433333  | 0.107855556 | 1.077625246 |
| 0.0929       | -0.1253      | 0.107811111 | 1.077592049 |
| 0.104866667  | 0.0442       | 0.107711111 | 1.077517359 |
| 0.028933333  | 0.0052       | 0.107644444 | 1.077467568 |
| -0.0174      | 0.0341       | 0.107566667 | 1.077409482 |
| 0.195766667  | 0.3021       | 0.107488889 | 1.077351399 |
| -0.219766667 | 0.009266667  | 0.107466667 | 1.077334804 |
| -0.068333333 | 0.0814       | 0.107366667 | 1.077260131 |
| 0.0397       | -0.082733333 | 0.107177778 | 1.077119097 |
| 0.1508       | 0.055766667  | 0.107155556 | 1.077102506 |
| 0.0252       | 0.076333333  | 0.107155556 | 1.077102506 |
| -0.019233333 | 0.016733333  | 0.107133333 | 1.077085915 |
| 0.061166667  | 0.0999       | 0.107111111 | 1.077069325 |
| 0.200966667  | 0.027466667  | 0.106788889 | 1.076828791 |
| -0.058666667 | -0.0982      | 0.106766667 | 1.076812205 |
| -0.023266667 | 0.060666667  | 0.106766667 | 1.076812205 |
| 0.401666667  | 0.038966667  | 0.106744444 | 1.076795618 |
| 0.036433333  | 0.182233333  | 0.1067      | 1.076762446 |
| 0.216733333  | -0.776833333 | 0.106677778 | 1.076745861 |
| 0.030566667  | -0.1243      | 0.106455556 | 1.07658002  |
| -0.0561      | 0.239133333  | 0.106444444 | 1.076571728 |
| -0.014566667 | 0.1297       | 0.106411111 | 1.076546854 |
| 0.145        | 0.181333333  | 0.106311111 | 1.076472236 |
| 0.0968       | 0.200133333  | 0.106277778 | 1.076447365 |
| 0.197666667  | 0.135966667  | 0.106255556 | 1.076430784 |
| -0.160933333 | -0.052266667 | 0.1061      | 1.076314727 |
| 0.146533333  | 0.159833333  | 0.106088889 | 1.076306437 |
| 0.292233333  | -0.068166667 | 0.1059      | 1.076165528 |
| -0.020733333 | 0.0721       | 0.105822222 | 1.076107512 |
| 0.203266667  | 0.208666667  | 0.105811111 | 1.076099224 |
| 0.0549       | 0.060733333  | 0.105744444 | 1.076049499 |
| -0.0601      | 0.094233333  | 0.105722222 | 1.076032925 |
| 0.390433333  | -0.0413      | 0.105677778 | 1.075999776 |
| -0.0215      | -0.0808      | 0.105666667 | 1.075991489 |
| -0.006933333 | 0.071266667  | 0.105622222 | 1.075958342 |
| 0.1426       | 0.0605       | 0.105544444 | 1.075900337 |

|              |              |             |             |
|--------------|--------------|-------------|-------------|
| 0.087        | -0.077333333 | 0.105411111 | 1.075800908 |
| 0.177266667  | 0.1326       | 0.105366667 | 1.075767766 |
| 0.021733333  | 0.021566667  | 0.105322222 | 1.075734626 |
| -0.039033333 | -0.024966667 | 0.105311111 | 1.075726341 |
| 0.2774       | 0.249733333  | 0.105311111 | 1.075726341 |
| -0.010966667 | -0.0744      | 0.1052      | 1.075643496 |
| -0.0236      | 0.1563       | 0.105188889 | 1.075635212 |
| 0.3212       | -0.131166667 | 0.105022222 | 1.075510957 |
| -0.144366667 | -0.0341      | 0.104977778 | 1.075477824 |
| -0.124033333 | -0.146266667 | 0.104888889 | 1.075411563 |
| 0.2619       | -0.048       | 0.104866667 | 1.075394998 |
| 0.007733333  | -0.052266667 | 0.1047      | 1.075270771 |
| 0.201333333  | 0.006833333  | 0.104666667 | 1.075245927 |
| 0.307933333  | 2.31E-18     | 0.104533333 | 1.075146558 |
| -0.006333333 | -0.095266667 | 0.104477778 | 1.075105157 |
| 0.2491       | 0.2602       | 0.104377778 | 1.075030639 |
| 0.202333333  | -0.0355      | 0.104355556 | 1.07501408  |
| -0.0811      | 0.308633333  | 0.104222222 | 1.074914732 |
| 0.187033333  | -0.277333333 | 0.104211111 | 1.074906454 |
| 0.312266667  | 0.046866667  | 0.104166667 | 1.07487334  |
| 0.065433333  | 0.070933333  | 0.104066667 | 1.074798838 |
| -0.062566667 | -0.056133333 | 0.103855556 | 1.074641573 |
| 0.0143       | -0.0469      | 0.103733333 | 1.074550535 |
| 0.122166667  | 0.0188       | 0.103677778 | 1.074509157 |
| 0.1951       | -0.0044      | 0.103677778 | 1.074509157 |
| 0.0671       | 0.0458       | 0.103644444 | 1.074484331 |
| -0.105166667 | -0.208966667 | 0.103533333 | 1.074401581 |
| 0.055233333  | -0.018766667 | 0.103433333 | 1.074327112 |
| -0.0291      | 0.009733333  | 0.1034      | 1.07430229  |
| 0.0128       | 0.1533       | 0.103311111 | 1.074236101 |
| -0.076433333 | 0.0147       | 0.103288889 | 1.074219555 |
| 0.069666667  | 0.0396       | 0.103277778 | 1.074211281 |
| 0.180966667  | 0.107733333  | 0.103011111 | 1.074012743 |
| 0.069766667  | 0.143833333  | 0.102911111 | 1.073938301 |
| -0.111833333 | -0.1406      | 0.102777778 | 1.073839053 |
| 0.073533333  | -0.092033333 | 0.102744444 | 1.073814242 |
| 0.104166667  | 0.138433333  | 0.102733333 | 1.073805972 |
| 0.041433333  | -0.0149      | 0.102677778 | 1.073764622 |
| -0.017566667 | 0.064166667  | 0.102644444 | 1.073739813 |
| 0.050066667  | 0.045966667  | 0.102622222 | 1.073723274 |
| 0.020733333  | -0.0134      | 0.102622222 | 1.073723274 |
| 0.069533333  | -0.2095      | 0.102477778 | 1.073615777 |
| 0.0071       | 0.003366667  | 0.102277778 | 1.073466953 |
| 0.490166667  | 0.366933333  | 0.102222222 | 1.073425616 |
| 0.029966667  | 0.003966667  | 0.102144444 | 1.073367748 |
| 0.1051       | -0.000166667 | 0.101833333 | 1.073136306 |
| 0.0288       | -0.154533333 | 0.101822222 | 1.073128041 |

|              |              |             |             |
|--------------|--------------|-------------|-------------|
| 0.016966667  | 0.235666667  | 0.101822222 | 1.073128041 |
| 0.1222       | 0.0279       | 0.101733333 | 1.073061924 |
| 0.085066667  | 0.0443       | 0.101688889 | 1.073028867 |
| -0.052466667 | 0.0032       | 0.1015      | 1.072888387 |
| 0.0617       | 0.092033333  | 0.101433333 | 1.07283881  |
| 0.053633333  | -0.058766667 | 0.101422222 | 1.072830548 |
| 0.0989       | 0.208066667  | 0.101411111 | 1.072822285 |
| 0.103233333  | 0.006533333  | 0.101411111 | 1.072822285 |
| 0.020433333  | -0.1722      | 0.101266667 | 1.072714878 |
| -0.017466667 | 0.015666667  | 0.101188889 | 1.072657048 |
| 0.0623       | 0.1404       | 0.101055556 | 1.072557918 |
| 0.008566667  | -0.0167      | 0.100966667 | 1.072491837 |
| 0.0522       | -0.054066667 | 0.100922222 | 1.072458797 |
| -0.003433333 | -0.000966667 | 0.100922222 | 1.072458797 |
| -0.061433333 | -0.153466667 | 0.100844444 | 1.072400981 |
| 0.398633333  | 0.437533333  | 0.100811111 | 1.072376204 |
| 0.339766667  | 0.3645       | 0.1008      | 1.072367945 |
| -0.086933333 | -0.0211      | 0.100744444 | 1.072326651 |
| 0.079766667  | -0.054833333 | 0.100722222 | 1.072310133 |
| 0.1153       | -0.354166667 | 0.1007      | 1.072293616 |
| -0.060566667 | 0.082266667  | 0.100677778 | 1.0722771   |
| 0.018433333  | 0.1695       | 0.100611111 | 1.072227551 |
| 0.086566667  | 0.107533333  | 0.100544444 | 1.072178005 |
| 0.131866667  | 0.285766667  | 0.100488889 | 1.072136718 |
| -0.011833333 | -0.091166667 | 0.100466667 | 1.072120204 |
| 0.106        | 0.271333333  | 0.100444444 | 1.07210369  |
| 0.030133333  | -0.085733333 | 0.100355556 | 1.072037636 |
| -0.076433333 | 0.016333333  | 0.100288889 | 1.071988099 |
| 0.1424       | 0.365566667  | 0.100288889 | 1.071988099 |
| 0.2982       | 0.165733333  | 0.100277778 | 1.071979843 |
| 0.076066667  | 0.063066667  | 0.100088889 | 1.0718395   |
| 0.019666667  | 0.0105       | 0.099944444 | 1.071732191 |
| 0.1169       | -0.4253      | 0.099933333 | 1.071723937 |
| -0.0963      | 0.125666667  | 0.099922222 | 1.071715683 |
| 0.1316       | 0.0331       | 0.099911111 | 1.071707429 |
| 0.010933333  | -0.1276      | 0.099833333 | 1.071649654 |
| 0.1158       | -0.1503      | 0.099755556 | 1.071591881 |
| 0.148866667  | -0.120133333 | 0.099522222 | 1.071418582 |
| 0.1625       | 0.018833333  | 0.099477778 | 1.071385576 |
| 0.066533333  | 0.163        | 0.099433333 | 1.07135257  |
| -0.025366667 | -0.076433333 | 0.099422222 | 1.071344319 |
| -0.005166667 | 0.015166667  | 0.099411111 | 1.071336068 |
| -0.149566667 | -0.0424      | 0.099322222 | 1.071270062 |
| -0.0464      | -0.018466667 | 0.099311111 | 1.071261811 |
| -0.026333333 | 0.1393       | 0.0993      | 1.071253561 |
| 0.085666667  | 0.037866667  | 0.099288889 | 1.071245311 |
| 0.068366667  | 0.020033333  | 0.099266667 | 1.07122881  |

|              |              |             |             |
|--------------|--------------|-------------|-------------|
| 0.1633       | 0.2264       | 0.099066667 | 1.071080316 |
| -0.059533333 | 0.1088       | 0.099044444 | 1.071063818 |
| 0.0904       | 0.136        | 0.099044444 | 1.071063818 |
| 0.0406       | 0.0879       | 0.099033333 | 1.07105557  |
| 0.202466667  | -0.160566667 | 0.098944444 | 1.070989581 |
| 0.039566667  | 0.130933333  | 0.098888889 | 1.070948339 |
| 0.0813       | 0.234933333  | 0.098888889 | 1.070948339 |
| -0.183533333 | 0.039        | 0.098855556 | 1.070923596 |
| -0.086366667 | -0.0258      | 0.098611111 | 1.070742158 |
| 0.268933333  | -0.0671      | 0.0986      | 1.070733912 |
| 0.293666667  | -0.0754      | 0.098477778 | 1.070643205 |
| 0.108166667  | -0.042033333 | 0.0983      | 1.070511282 |
| 0.029266667  | 0.144433333  | 0.098255556 | 1.070478304 |
| -0.092666667 | 0.044433333  | 0.098177778 | 1.070420594 |
| 0.082966667  | 0.2847       | 0.098166667 | 1.07041235  |
| -0.057266667 | -0.0679      | 0.098111111 | 1.070371131 |
| 0.063566667  | 0.0923       | 0.098088889 | 1.070354644 |
| -0.0385      | 0.009066667  | 0.098044444 | 1.070321671 |
| 0.160966667  | 0.0693       | 0.098033333 | 1.070313428 |
| 0.2387       | 0.241566667  | 0.098022222 | 1.070305185 |
| 0.1199       | 0.294933333  | 0.098       | 1.070288698 |
| 0.320133333  | -0.029533333 | 0.097977778 | 1.070272213 |
| 0.253466667  | 0.0911       | 0.097955556 | 1.070255727 |
| 0.161566667  | -0.1281      | 0.097911111 | 1.070222757 |
| 0.292933333  | 0.179266667  | 0.097733333 | 1.070090885 |
| -0.070166667 | -0.072633333 | 0.097622222 | 1.070008474 |
| 0.013066667  | -0.1567      | 0.097544444 | 1.06995079  |
| 0.046766667  | -0.083733333 | 0.097422222 | 1.06986015  |
| -0.081033333 | 0.029        | 0.097266667 | 1.0697448   |
| 0.3595       | 0.000733333  | 0.097255556 | 1.069736562 |
| 0.076566667  | -0.0738      | 0.097       | 1.069547088 |
| 0.2509       | 0.063066667  | 0.096966667 | 1.069522376 |
| -0.018233333 | 0.246833333  | 0.096888889 | 1.069464718 |
| 0.0699       | 0.054633333  | 0.096877778 | 1.069456482 |
| 0.102033333  | 0.132966667  | 0.096733333 | 1.069349412 |
| 0.150466667  | -0.179233333 | 0.096677778 | 1.069308234 |
| 0.194766667  | -0.0837      | 0.096622222 | 1.069267058 |
| 0.106766667  | 0.071166667  | 0.096622222 | 1.069267058 |
| 0.064666667  | 0.062433333  | 0.0966      | 1.069250588 |
| 0.0187       | 0.294333333  | 0.096511111 | 1.06918471  |
| 0.2374       | -0.116333333 | 0.096411111 | 1.069110602 |
| -0.0259      | 0.023133333  | 0.096411111 | 1.069110602 |
| 0.059533333  | -0.149066667 | 0.096377778 | 1.069085901 |
| 0.036266667  | 0.178366667  | 0.096277778 | 1.0690118   |
| 0.111        | 0.100933333  | 0.095944444 | 1.068764834 |
| 0.029066667  | -0.012833333 | 0.095855556 | 1.068698986 |
| -0.0956      | 0.025833333  | 0.095733333 | 1.068608452 |

|              |              |             |             |
|--------------|--------------|-------------|-------------|
| 0.006566667  | 0.381466667  | 0.095666667 | 1.068559073 |
| 0.1535       | 0.015166667  | 0.095522222 | 1.068452093 |
| 0.333166667  | 0.118566667  | 0.095444444 | 1.068394493 |
| 0.125833333  | -0.0943      | 0.095188889 | 1.068205257 |
| -0.063133333 | 0.0187       | 0.095122222 | 1.068155896 |
| 0.344933333  | -0.023333333 | 0.094988889 | 1.068057182 |
| 0.108533333  | 0.116766667  | 0.094711111 | 1.067851557 |
| 0.029366667  | 0.267366667  | 0.094666667 | 1.067818661 |
| -0.0542      | 0.028566667  | 0.094544444 | 1.067728201 |
| 0.018933333  | -0.016133333 | 0.094544444 | 1.067728201 |
| 0.151033333  | 0.239133333  | 0.094355556 | 1.067588415 |
| 0.368133333  | 0.126766667  | 0.094288889 | 1.067539083 |
| -0.154666667 | 0.014133333  | 0.094244444 | 1.067506197 |
| -0.0695      | -0.0728      | 0.094233333 | 1.067497975 |
| 0.234833333  | 0.109933333  | 0.094188889 | 1.06746509  |
| 0.1832       | 0.0547       | 0.094133333 | 1.067423984 |
| -0.006266667 | 0.120866667  | 0.093955556 | 1.067292458 |
| 0.1794       | -0.048433333 | 0.093866667 | 1.067226701 |
| 0.196566667  | 0.0776       | 0.093833333 | 1.067202043 |
| 0.027466667  | 0.154633333  | 0.093777778 | 1.067160948 |
| -0.013133333 | -0.0962      | 0.093711111 | 1.067111636 |
| -0.0351      | -0.219333333 | 0.0937      | 1.067103417 |
| -0.0574      | 0.095533333  | 0.093666667 | 1.067078762 |
| 0.0478       | 0.0505       | 0.093611111 | 1.067037672 |
| -0.041466667 | -0.144466667 | 0.0935      | 1.066955495 |
| 0.139966667  | 0.112833333  | 0.093455556 | 1.066922627 |
| 0.073933333  | 0.173166667  | 0.093388889 | 1.066873326 |
| 0.033266667  | 0.023933333  | 0.093355556 | 1.066848676 |
| 0.0311       | -0.015166667 | 0.093344444 | 1.066840459 |
| 0.0434       | 0.176633333  | 0.093166667 | 1.066709005 |
| -0.074566667 | -0.0601      | 0.092922222 | 1.066528281 |
| -0.039       | -0.1576      | 0.092922222 | 1.066528281 |
| 0.166666667  | 0.067233333  | 0.092844444 | 1.066470785 |
| -0.0537      | 0.118733333  | 0.092811111 | 1.066446144 |
| -0.057433333 | -0.152       | 0.092555556 | 1.066257253 |
| -0.010566667 | -0.024933333 | 0.092511111 | 1.066224406 |
| 0.050133333  | -0.0402      | 0.092411111 | 1.066150504 |
| 0.0478       | 0.1148       | 0.092311111 | 1.066076606 |
| 0.050233333  | 0.195133333  | 0.092266667 | 1.066043765 |
| -0.015133333 | 0.092866667  | 0.092244444 | 1.066027344 |
| -0.053666667 | -0.032933333 | 0.092233333 | 1.066019134 |
| 0.0785       | -0.0546      | 0.092       | 1.065846736 |
| -0.021566667 | -0.082633333 | 0.091822222 | 1.065715404 |
| 0.111466667  | 0.044766667  | 0.091811111 | 1.065707196 |
| 0.226466667  | 0.087666667  | 0.0918      | 1.065698989 |
| -0.076266667 | 0.0618       | 0.091766667 | 1.065674366 |
| 0.138833333  | 0.1          | 0.091677778 | 1.065608709 |

|              |              |             |             |
|--------------|--------------|-------------|-------------|
| -0.0174      | -0.031066667 | 0.091655556 | 1.065592295 |
| -0.028066667 | -0.033333333 | 0.091644444 | 1.065584088 |
| 0.2188       | 0.150633333  | 0.091488889 | 1.0654692   |
| 0.082266667  | -0.008833333 | 0.091444444 | 1.065436377 |
| 0.0744       | -0.110133333 | 0.0913      | 1.065329709 |
| 0.007433333  | -0.032       | 0.091288889 | 1.065321505 |
| 0.160133333  | 0.108166667  | 0.091277778 | 1.0653133   |
| 0.2499       | 0.017133333  | 0.091255556 | 1.065296891 |
| 0.143533333  | 0.1165       | 0.0912      | 1.065255869 |
| -0.1555      | -0.201366667 | 0.091188889 | 1.065247665 |
| -0.0132      | 0.0584       | 0.091122222 | 1.065198441 |
| -0.0755      | 0.030633333  | 0.090888889 | 1.065026176 |
| 0.2142       | 0.0066       | 0.090855556 | 1.065001569 |
| 0.2283       | 0.192866667  | 0.090822222 | 1.064976962 |
| 0.047266667  | 0.289666667  | 0.090822222 | 1.064976962 |
| 0.1281       | 0.111066667  | 0.090733333 | 1.064911348 |
| 0.004833333  | -0.032033333 | 0.090722222 | 1.064903146 |
| 0.042366667  | 0.000133333  | 0.090655556 | 1.064853938 |
| -0.0442      | 0.013566667  | 0.090466667 | 1.064714529 |
| 0.012066667  | 0.076433333  | 0.090433333 | 1.064689929 |
| 0.0133       | -0.0444      | 0.090211111 | 1.064525944 |
| -0.085966667 | -0.1118      | 0.090177778 | 1.064501349 |
| 0.127133333  | -0.058766667 | 0.090177778 | 1.064501349 |
| -0.1088      | -0.0113      | 0.0901      | 1.064443962 |
| -0.0518      | -0.1049      | 0.089922222 | 1.064312802 |
| 0.064333333  | 0.132633333  | 0.089922222 | 1.064312802 |
| -0.100533333 | 0.111433333  | 0.089855556 | 1.064263622 |
| 0.027666667  | 0.0712       | 0.089822222 | 1.064239032 |
| -0.1224      | -0.188133333 | 0.089755556 | 1.064189855 |
| -0.017733333 | 0.1634       | 0.089622222 | 1.064091508 |
| 0.094533333  | 0.302633333  | 0.089611111 | 1.064083312 |
| -0.036933333 | 0.056866667  | 0.089577778 | 1.064058727 |
| 0.120633333  | -0.021766667 | 0.089577778 | 1.064058727 |
| -0.266633333 | -0.173466667 | 0.089522222 | 1.064017753 |
| 0.1509       | 0.1437       | 0.089511111 | 1.064009558 |
| 0.0144       | -0.2362      | 0.089433333 | 1.063952198 |
| 0.033266667  | 0.052566667  | 0.089433333 | 1.063952198 |
| -0.087366667 | 0.147533333  | 0.089433333 | 1.063952198 |
| 0.243866667  | -0.0366      | 0.089377778 | 1.063911228 |
| 0.161733333  | 0.106033333  | 0.089266667 | 1.063829292 |
| 0.181666667  | 0.0902       | 0.089211111 | 1.063788327 |
| -0.043966667 | 0.083033333  | 0.0892      | 1.063780134 |
| -0.0099      | 0.018366667  | 0.089144444 | 1.06373917  |
| 0.0071       | -0.130533333 | 0.089111111 | 1.063714593 |
| -0.065233333 | 0.1151       | 0.0891      | 1.063706401 |
| 0.072233333  | 0.030933333  | 0.089077778 | 1.063690016 |
| 0.0138       | -0.115733333 | 0.088877778 | 1.063542568 |

|              |              |             |             |
|--------------|--------------|-------------|-------------|
| 0.0183       | 0.114166667  | 0.088677778 | 1.06339514  |
| 0.0517       | -0.195566667 | 0.088455556 | 1.063231355 |
| 0.022433333  | 0.1271       | 0.088455556 | 1.063231355 |
| -0.054833333 | 0.1425       | 0.0884      | 1.063190412 |
| 0.1494       | 0.050333333  | 0.088277778 | 1.063100345 |
| 0.026433333  | 0.018266667  | 0.088244444 | 1.063075782 |
| 0.05         | 0.0188       | 0.088244444 | 1.063075782 |
| -0.0484      | -0.086533333 | 0.088122222 | 1.062985725 |
| -0.031166667 | 0.0332       | 0.087888889 | 1.062813817 |
| -0.007733333 | -0.0727      | 0.087822222 | 1.062764706 |
| 0.089666667  | 0.081866667  | 0.087811111 | 1.062756521 |
| -0.069366667 | -0.135033333 | 0.087777778 | 1.062731966 |
| 0.281266667  | 0.116533333  | 0.087688889 | 1.06266649  |
| -0.061266667 | 0.035666667  | 0.087611111 | 1.062609202 |
| 0.007766667  | 0.062266667  | 0.087611111 | 1.062609202 |
| -0.0248      | 0.013066667  | 0.087422222 | 1.062470086 |
| 0.1438       | 0.1786       | 0.0874      | 1.06245372  |
| -0.0584      | -0.115733333 | 0.087311111 | 1.062388261 |
| 0.120033333  | 0.1906       | 0.087222222 | 1.062322806 |
| -0.068633333 | -0.145833333 | 0.087222222 | 1.062322806 |
| -0.0908      | 0.057566667  | 0.087144444 | 1.062265537 |
| -0.0328      | -0.075033333 | 0.0871      | 1.062232812 |
| 0.1663       | -0.009533333 | 0.086966667 | 1.062134646 |
| 0.132833333  | 0.078566667  | 0.086866667 | 1.062061027 |
| 0.061733333  | 0.054        | 0.0868      | 1.06201195  |
| 0.078066667  | 0.0544       | 0.086711111 | 1.061946518 |
| -0.062966667 | -0.092266667 | 0.086633333 | 1.061889269 |
| 0.095333333  | 0.119633333  | 0.086555556 | 1.061832022 |
| 0.057533333  | 0.0152       | 0.086488889 | 1.061782956 |
| -0.000133333 | -0.017133333 | 0.086411111 | 1.061725716 |
| 0.233833333  | 0.111333333  | 0.086411111 | 1.061725716 |
| 0.036766667  | 0.080266667  | 0.086277778 | 1.061627596 |
| 0.084766667  | -0.023333333 | 0.086255556 | 1.061611244 |
| 0.071133333  | 0.1779       | 0.086255556 | 1.061611244 |
| -0.006466667 | -0.0663      | 0.086177778 | 1.061554012 |
| 0.017466667  | -0.067133333 | 0.086144444 | 1.061529485 |
| 0.191633333  | 0.029533333  | 0.086144444 | 1.061529485 |
| -0.054933333 | 0.048533333  | 0.086033333 | 1.061447733 |
| 0.0053       | 0.023466667  | 0.086       | 1.061423209 |
| -0.1019      | -0.024       | 0.085955556 | 1.061390511 |
| 0.039233333  | -0.0053      | 0.085933333 | 1.061374162 |
| 0.037866667  | -0.083933333 | 0.085466667 | 1.061030896 |
| 0.187266667  | -0.008466667 | 0.085444444 | 1.061014553 |
| 0.092566667  | 0.034        | 0.085288889 | 1.060900157 |
| 0.1582       | 0.053466667  | 0.085277778 | 1.060891987 |
| -0.025566667 | 0.132733333  | 0.085244444 | 1.060867475 |
| 0.079133333  | -0.0781      | 0.085155556 | 1.060802114 |



|              |              |             |             |
|--------------|--------------|-------------|-------------|
| 0.089533333  | 0.077566667  | 0.085022222 | 1.06070408  |
| 0.0614       | 0.393633333  | 0.085       | 1.060687741 |
| 0.2267       | -0.2156      | 0.084844444 | 1.060573381 |
| 0.0443       | -0.137466667 | 0.0847      | 1.0604672   |
| 0.013133333  | 0.075633333  | 0.084622222 | 1.060410031 |
| 0.248633333  | 0.282133333  | 0.0846      | 1.060393697 |
| -0.035433333 | 0.0183       | 0.084533333 | 1.060344698 |
| 0.142133333  | -0.023066667 | 0.084533333 | 1.060344698 |
| 0.007633333  | -0.0045      | 0.0845      | 1.060320199 |
| 0.148966667  | -0.024233333 | 0.084433333 | 1.060271203 |
| -0.032733333 | 0.180166667  | 0.084355556 | 1.060214043 |
| 0.048        | -0.1204      | 0.0842      | 1.060099734 |
| 0.0063       | 0.0662       | 0.084044444 | 1.059985437 |
| 0.155633333  | 0.103833333  | 0.084011111 | 1.059960947 |
| -0.1041      | -0.158333333 | 0.083911111 | 1.059887478 |
| -0.142866667 | -0.086866667 | 0.083855556 | 1.059846665 |
| 0.018133333  | 0.087633333  | 0.083833333 | 1.05983034  |
| 0.2717       | -0.002533333 | 0.083388889 | 1.059503893 |
| 0.1021       | 0.0855       | 0.083322222 | 1.059454935 |
| 0.027666667  | 0.0975       | 0.083166667 | 1.059340707 |
| 0.2666       | -0.066166667 | 0.083066667 | 1.059267282 |
| 0.309433333  | 0.417333333  | 0.083044444 | 1.059250966 |
| 0.1858       | 0.056466667  | 0.082977778 | 1.059202019 |
| 0.4845       | -0.020266667 | 0.0828      | 1.059071506 |
| -0.005233333 | 0.0417       | 0.082766667 | 1.059047037 |
| 0.0178       | -0.033966667 | 0.082733333 | 1.059022568 |
| 0.002033333  | -0.2444      | 0.082666667 | 1.058973632 |
| 0.2945       | 0.0299       | 0.082644444 | 1.05895732  |
| 0.0307       | 0.0036       | 0.082633333 | 1.058949164 |
| -0.016033333 | -0.005266667 | 0.082588889 | 1.058916542 |
| 0.0073       | -0.111233333 | 0.082422222 | 1.058794219 |
| 0.011533333  | 0.271766667  | 0.082411111 | 1.058786064 |
| 0.035666667  | 0.013133333  | 0.082366667 | 1.058753447 |
| -0.0184      | 0.136833333  | 0.082333333 | 1.058728985 |
| -0.021533333 | 0.072966667  | 0.082266667 | 1.058680062 |
| -0.048066667 | 0.070666667  | 0.082244444 | 1.058663755 |
| -0.012833333 | 0.0836       | 0.082233333 | 1.058655602 |
| -0.075766667 | -0.066       | 0.082222222 | 1.058647449 |
| 0.066633333  | 0.001133333  | 0.082188889 | 1.058622989 |
| 0.177666667  | -0.1191      | 0.082177778 | 1.058614836 |
| 0.0279       | -0.352033333 | 0.082133333 | 1.058582224 |
| 0.171733333  | -0.1004      | 0.082088889 | 1.058549613 |
| -0.0534      | 0.190833333  | 0.082066667 | 1.058533308 |
| 0.098666667  | 0.025366667  | 0.082066667 | 1.058533308 |
| 0.098366667  | 0.1139       | 0.081966667 | 1.058459939 |
| 0.091933333  | -0.108933333 | 0.0818      | 1.058337668 |
| 0.020933333  | 0.007966667  | 0.081755556 | 1.058305065 |

|              |              |             |             |
|--------------|--------------|-------------|-------------|
| -0.150333333 | -0.248566667 | 0.081633333 | 1.058215411 |
| 0.198933333  | 0.150266667  | 0.081633333 | 1.058215411 |
| 0.131666667  | 4.00E-04     | 0.081622222 | 1.058207261 |
| 0.1893       | -0.111166667 | 0.081622222 | 1.058207261 |
| 0.055666667  | -0.058133333 | 0.081611111 | 1.058199111 |
| 0.096833333  | 0.056566667  | 0.081588889 | 1.058182812 |
| 0.142633333  | 0.141        | 0.081533333 | 1.058142064 |
| -0.191466667 | -0.143766667 | 0.081488889 | 1.058109466 |
| 0.103566667  | -0.044333333 | 0.081244444 | 1.0579302   |
| 0.004466667  | -0.030133333 | 0.081244444 | 1.0579302   |
| -0.049       | 0.153733333  | 0.081211111 | 1.057905757 |
| 0.1818       | 0.0546       | 0.081188889 | 1.057889462 |
| -0.048466667 | 0.150233333  | 0.0811      | 1.057824284 |
| 0.015166667  | -0.0734      | 0.081088889 | 1.057816137 |
| 0.028        | -0.098533333 | 0.081077778 | 1.05780799  |
| -0.017566667 | 0.0281       | 0.081044444 | 1.05778355  |
| 0.083466667  | 0.155766667  | 0.080988889 | 1.057742817 |
| 0.068066667  | 0.018633333  | 0.080888889 | 1.057669503 |
| 0.084366667  | 0.3295       | 0.080811111 | 1.057612484 |
| 0.100533333  | 0.069166667  | 0.080788889 | 1.057596193 |
| -0.005366667 | 0.099833333  | 0.080733333 | 1.057555468 |
| -0.029933333 | 0.0501       | 0.080677778 | 1.057514744 |
| 0.272433333  | -0.0393      | 0.080633333 | 1.057482166 |
| 0.084833333  | 0.124633333  | 0.080466667 | 1.057360008 |
| -0.0794      | 0.1516       | 0.080411111 | 1.057319292 |
| 0.008633333  | 0.021833333  | 0.080388889 | 1.057303006 |
| 0.156066667  | 0.084        | 0.080211111 | 1.057172726 |
| -0.147       | -0.010766667 | 0.080144444 | 1.057123876 |
| -0.0538      | 0.1174       | 0.080066667 | 1.057066886 |
| 0.0101       | -0.059766667 | 0.080044444 | 1.057050604 |
| -0.0551      | 0.012033333  | 0.079944444 | 1.056977338 |
| -0.036433333 | 0.047333333  | 0.0799      | 1.056944776 |
| 0.198733333  | 0.0816       | 0.0799      | 1.056944776 |
| -0.0272      | 0.1621       | 0.079877778 | 1.056928496 |
| 0.040266667  | 0.070166667  | 0.079866667 | 1.056920356 |
| -0.029533333 | 0.049766667  | 0.079855556 | 1.056912216 |
| -0.134266667 | -0.1088      | 0.079822222 | 1.056887796 |
| 0.116033333  | 0.0234       | 0.0798      | 1.056871517 |
| -0.0237      | -0.0306      | 0.079755556 | 1.056838959 |
| 0.1423       | 0.114666667  | 0.079688889 | 1.056790124 |
| -0.105666667 | -0.1957      | 0.079677778 | 1.056781985 |
| -0.032333333 | -0.035633333 | 0.079566667 | 1.056700598 |
| -0.099466667 | -0.0582      | 0.079533333 | 1.056676184 |
| 0.136466667  | 0.169033333  | 0.079422222 | 1.056594805 |
| -0.135733333 | -0.099666667 | 0.079333333 | 1.056529707 |
| 0.027766667  | 0.071333333  | 0.079277778 | 1.056489023 |
| 0.078733333  | 0.094666667  | 0.079266667 | 1.056480886 |

|              |              |             |             |
|--------------|--------------|-------------|-------------|
| -0.012133333 | 0.057833333  | 0.079177778 | 1.056415795 |
| -0.183566667 | -0.0135      | 0.079111111 | 1.05636698  |
| 0.0037       | -0.110933333 | 0.0791      | 1.056358844 |
| 0.038233333  | 0.0842       | 0.078966667 | 1.05626122  |
| 0.400566667  | -0.0712      | 0.0789      | 1.056212412 |
| -0.0426      | 0.109966667  | 0.078877778 | 1.056196143 |
| 0.131966667  | -0.049566667 | 0.078833333 | 1.056163605 |
| -0.038966667 | 0.012433333  | 0.078833333 | 1.056163605 |
| 0.0272       | -0.161066667 | 0.078822222 | 1.056155471 |
| 0.1325       | 0.222533333  | 0.078666667 | 1.0560416   |
| -0.069866667 | 0.039933333  | 0.078622222 | 1.056009067 |
| 0.090433333  | 0.188433333  | 0.078588889 | 1.055984669 |
| -0.039166667 | -0.060633333 | 0.078588889 | 1.055984669 |
| 0.016633333  | 0.054633333  | 0.078311111 | 1.055781368 |
| 0.0663       | 0.112566667  | 0.078277778 | 1.055756974 |
| -0.005566667 | 0.033633333  | 0.078222222 | 1.05571632  |
| -0.0728      | -0.0777      | 0.078211111 | 1.055708189 |
| 0.070433333  | -0.052466667 | 0.0782      | 1.055700059 |
| -0.074       | 0.035166667  | 0.0781      | 1.055626886 |
| 0.640266667  | 0.617        | 0.078011111 | 1.055561847 |
| 0.0586       | 0.045566667  | 0.077955556 | 1.0555212   |
| 0.073166667  | 0.052733333  | 0.077933333 | 1.055504942 |
| -0.077566667 | -0.093966667 | 0.077911111 | 1.055488684 |
| 0.0011       | 0.152133333  | 0.077866667 | 1.055456168 |
| 0.082366667  | 0.070266667  | 0.0776      | 1.055261097 |
| 0.135        | 0.265066667  | 0.077566667 | 1.055236715 |
| 0.023733333  | -0.064633333 | 0.077544444 | 1.055220461 |
| -0.073933333 | 0.090966667  | 0.077533333 | 1.055212334 |
| 0.106133333  | 0.061666667  | 0.077522222 | 1.055204207 |
| -0.1069      | 0.2205       | 0.077511111 | 1.055196081 |
| 0.257866667  | 0.198833333  | 0.077444444 | 1.055147321 |
| 0.2705       | -0.0138      | 0.077377778 | 1.055098564 |
| 0.036166667  | -0.008566667 | 0.077377778 | 1.055098564 |
| -0.096       | 0.065566667  | 0.077344444 | 1.055074187 |
| 0.1783       | -0.181233333 | 0.077333333 | 1.055066061 |
| -0.0234      | 0.163433333  | 0.077288889 | 1.055033558 |
| -0.0911      | 0.3303       | 0.077266667 | 1.055017308 |
| -0.086       | 0.064433333  | 0.077255556 | 1.055009182 |
| 0.077066667  | 0.135333333  | 0.077233333 | 1.054992932 |
| 0.004833333  | 0.067633333  | 0.077188889 | 1.054960432 |
| 0.0482       | 0.022966667  | 0.077177778 | 1.054952307 |
| 0.028733333  | -0.123733333 | 0.077133333 | 1.054919808 |
| -0.025733333 | 0.106433333  | 0.0771      | 1.054895434 |
| 0.0874       | -0.0197      | 0.077088889 | 1.05488731  |
| -0.0168      | -0.185666667 | 0.077066667 | 1.054871061 |
| 0.074166667  | 0.000133333  | 0.077033333 | 1.054846689 |
| 0.077166667  | 0.0825       | 0.077011111 | 1.054830441 |

|              |              |             |             |
|--------------|--------------|-------------|-------------|
| 0.0205       | 0.057833333  | 0.076977778 | 1.054806069 |
| 0.069066667  | 0.082066667  | 0.076933333 | 1.054773575 |
| 0.047766667  | 0.1906       | 0.076877778 | 1.054732958 |
| 0.154033333  | 0.3881       | 0.076866667 | 1.054724835 |
| 0.0832       | -0.012866667 | 0.076644444 | 1.054562386 |
| -0.060633333 | 0.049266667  | 0.076533333 | 1.05448117  |
| -0.018066667 | -0.100366667 | 0.076522222 | 1.054473049 |
| -0.046666667 | 0.059833333  | 0.076422222 | 1.054399961 |
| 0.1816       | 0.171566667  | 0.076388889 | 1.0543756   |
| 0.109433333  | 0.057233333  | 0.076377778 | 1.054367479 |
| 0.019166667  | -0.064666667 | 0.076333333 | 1.054334998 |
| 0.047033333  | 0.152233333  | 0.076222222 | 1.0542538   |
| 0.4557       | 0.4263       | 0.0762      | 1.054237562 |
| 0.287166667  | 0.0165       | 0.076188889 | 1.054229442 |
| -0.011466667 | -0.012766667 | 0.076133333 | 1.054188847 |
| 0.008166667  | -0.022366667 | 0.0761      | 1.05416449  |
| 0.076733333  | 0.086066667  | 0.076077778 | 1.054148252 |
| -0.098666667 | -0.0271      | 0.076033333 | 1.054115778 |
| 0.051333333  | 0.004966667  | 0.076022222 | 1.05410766  |
| 0.031866667  | 0.036866667  | 0.075988889 | 1.054083305 |
| 0.019866667  | 0.0284       | 0.075944444 | 1.054050833 |
| -0.282066667 | -0.237466667 | 0.075944444 | 1.054050833 |
| -0.1021      | -0.131866667 | 0.075777778 | 1.053929071 |
| -0.0561      | -0.128866667 | 0.075677778 | 1.053856021 |
| 0.025066667  | 0.1187       | 0.075344444 | 1.053612557 |
| 0.0698       | -0.207566667 | 0.0753      | 1.053580099 |
| 0.012466667  | -0.147766667 | 0.075144444 | 1.053466505 |
| 0.239566667  | 0.189733333  | 0.0751      | 1.053434052 |
| 0.134633333  | -0.009866667 | 0.075055556 | 1.0534016   |
| -0.013166667 | 0.071266667  | 0.074988889 | 1.053352923 |
| -0.1         | 0.076033333  | 0.074966667 | 1.053336698 |
| 0.1759       | 0.110566667  | 0.074844444 | 1.053247466 |
| -0.221033333 | -0.174466667 | 0.074711111 | 1.053150129 |
| -0.040866667 | 0.1939       | 0.074677778 | 1.053125797 |
| 0.073        | 0.118566667  | 0.074611111 | 1.053077133 |
| -0.1382      | 0.0998       | 0.074488889 | 1.052987922 |
| -0.0971      | -0.004066667 | 0.074477778 | 1.052979813 |
| -0.2078      | -0.1234      | 0.074466667 | 1.052971703 |
| -0.002533333 | 0.140066667  | 0.074333333 | 1.052874392 |
| 0.157033333  | 0.238566667  | 0.074311111 | 1.052858175 |
| 0.021433333  | 0.0105       | 0.074277778 | 1.052833849 |
| 0.103        | 0.122033333  | 0.074277778 | 1.052833849 |
| 0.045166667  | -0.0927      | 0.074233333 | 1.052801415 |
| 0.008166667  | 0.0389       | 0.074188889 | 1.052768982 |
| -0.0878      | 0.195933333  | 0.074177778 | 1.052760874 |
| 0.478        | 0.008233333  | 0.074177778 | 1.052760874 |
| 0.036266667  | -0.073866667 | 0.0741      | 1.05270412  |

|              |              |             |             |
|--------------|--------------|-------------|-------------|
| -0.008533333 | -0.1366      | 0.074066667 | 1.052679798 |
| 0.048766667  | 0.049066667  | 0.074055556 | 1.05267169  |
| 0.1303       | 0.034633333  | 0.073955556 | 1.052598727 |
| 0.022966667  | 0.064        | 0.073888889 | 1.052550088 |
| -0.085233333 | 0.0417       | 0.073866667 | 1.052533875 |
| -0.112566667 | 0.135866667  | 0.073866667 | 1.052533875 |
| 0.023733333  | -0.017766667 | 0.073788889 | 1.052477133 |
| 0.087166667  | 0.161666667  | 0.073744444 | 1.052444711 |
| -0.078133333 | 0.004066667  | 0.073666667 | 1.052387973 |
| 0.0033       | -0.086       | 0.073655556 | 1.052379868 |
| -0.066566667 | -0.029566667 | 0.0736      | 1.052339344 |
| 3.33E-05     | -0.070333333 | 0.073555556 | 1.052306925 |
| 0.021166667  | 0.319466667  | 0.073555556 | 1.052306925 |
| -0.110233333 | -0.120966667 | 0.073522222 | 1.052282612 |
| 0.164433333  | 0.097133333  | 0.073388889 | 1.052185365 |
| 0.3007       | -0.041833333 | 0.073377778 | 1.052177262 |
| -0.034833333 | 0.0404       | 0.073366667 | 1.052169158 |
| 0.129066667  | 0.228766667  | 0.073288889 | 1.052112436 |
| -0.120033333 | 0.025833333  | 0.073233333 | 1.052071922 |
| 0.074233333  | 0.165566667  | 0.073111111 | 1.051982796 |
| 0.0198       | 0.102033333  | 0.073111111 | 1.051982796 |
| -0.0624      | 0.163866667  | 0.073077778 | 1.05195849  |
| 0.025266667  | 0.0058       | 0.073077778 | 1.05195849  |
| 0.0335       | -0.0462      | 0.073044444 | 1.051934185 |
| 0.1197       | 0.0875       | 0.072911111 | 1.05183697  |
| -0.047033333 | -0.072733333 | 0.072877778 | 1.051812668 |
| 0.1419       | 0.1556       | 0.072822222 | 1.051772165 |
| 0.019766667  | 0.2844       | 0.072788889 | 1.051747865 |
| -0.182733333 | 0.163966667  | 0.072755556 | 1.051723564 |
| -0.125033333 | -0.0611      | 0.072722222 | 1.051699265 |
| 0.033533333  | -0.004466667 | 0.072722222 | 1.051699265 |
| -0.0424      | 0.1101       | 0.072688889 | 1.051674965 |
| 0.1518       | 0.020233333  | 0.072555556 | 1.051577775 |
| 0.055933333  | -0.102833333 | 0.072522222 | 1.051553478 |
| 0.0876       | -0.047933333 | 0.072444444 | 1.051496789 |
| 0.088033333  | 0.321066667  | 0.0723      | 1.051391517 |
| 0.063733333  | 0.0489       | 0.072255556 | 1.051359128 |
| 0.0165       | 0.085933333  | 0.072155556 | 1.051286256 |
| -0.159933333 | -0.0198      | 0.072111111 | 1.05125387  |
| 0.0059       | -0.126033333 | 0.072088889 | 1.051237677 |
| 0.043666667  | 0.079633333  | 0.072022222 | 1.051189101 |
| 0.181033333  | 0.0329       | 0.072022222 | 1.051189101 |
| 0.2066       | 0.165766667  | 0.072       | 1.051172909 |
| 0.134666667  | 0.182466667  | 0.071877778 | 1.05108386  |
| 0.183366667  | 0.035233333  | 0.071866667 | 1.051075765 |
| 0.080866667  | 0.009633333  | 0.071855556 | 1.05106767  |
| 0.0069       | 0.016833333  | 0.071811111 | 1.05103529  |

|              |              |             |             |
|--------------|--------------|-------------|-------------|
| -0.088333333 | -0.054266667 | 0.071811111 | 1.05103529  |
| -0.053666667 | -0.169033333 | 0.071733333 | 1.050978629 |
| -0.0029      | -0.003866667 | 0.071711111 | 1.050962441 |
| 0.102266667  | -0.0037      | 0.071711111 | 1.050962441 |
| -0.0016      | -0.021733333 | 0.0716      | 1.050881502 |
| -0.02        | -0.0186      | 0.071466667 | 1.050784385 |
| 0.250866667  | 0.108        | 0.071377778 | 1.050719645 |
| 0.237133333  | 0.248866667  | 0.0713      | 1.050663001 |
| -0.131       | -0.010633333 | 0.071188889 | 1.050582085 |
| 0.128        | -0.035566667 | 0.071066667 | 1.050493086 |
| 0.005166667  | 0.068266667  | 0.071033333 | 1.050468815 |
| 0.0622       | 0.0277       | 0.071       | 1.050444544 |
| 0.1553       | 0.044066667  | 0.070933333 | 1.050396004 |
| 0.103433333  | 0.020033333  | 0.070811111 | 1.050307021 |
| -0.011566667 | 0.2021       | 0.070788889 | 1.050290843 |
| -0.0407      | -0.165566667 | 0.070744444 | 1.050258487 |
| -0.090033333 | -0.1586      | 0.070733333 | 1.050250399 |
| -0.134866667 | -0.042033333 | 0.070677778 | 1.050209956 |
| 0.212933333  | 0.087766667  | 0.070644444 | 1.050185691 |
| -0.052033333 | 0.291966667  | 0.0706      | 1.050153339 |
| 0.0938       | -0.0772      | 0.070588889 | 1.050145251 |
| -0.0232      | 0.016566667  | 0.070566667 | 1.050129076 |
| -0.0716      | -0.093366667 | 0.070388889 | 1.04999968  |
| -0.156266667 | -0.096833333 | 0.0703      | 1.049934989 |
| -0.0427      | 0.0186       | 0.070177778 | 1.049846044 |
| 0.0307       | -0.047133333 | 0.070111111 | 1.049797532 |
| 0.223466667  | 0.061933333  | 0.070077778 | 1.049773277 |
| 0.155966667  | 0.0349       | 0.070033333 | 1.049740938 |
| 0.059866667  | 0.014333333  | 0.069966667 | 1.04969243  |
| 0.0456       | -0.095533333 | 0.069955556 | 1.049684346 |
| 0.187466667  | 0.093933333  | 0.069922222 | 1.049660093 |
| 0.076433333  | -0.0113      | 0.069777778 | 1.049555005 |
| -0.026366667 | 0.0456       | 0.069755556 | 1.049538839 |
| 0.1385       | -0.113       | 0.069744444 | 1.049530756 |
| 0.143466667  | -0.0566      | 0.069711111 | 1.049506507 |
| -0.076733333 | 0.005133333  | 0.069677778 | 1.049482258 |
| 0.0646       | 0.0684       | 0.069666667 | 1.049474176 |
| -0.146866667 | -0.157566667 | 0.069633333 | 1.049449928 |
| -0.174766667 | -0.1568      | 0.069555556 | 1.049393352 |
| -0.122366667 | -0.1223      | 0.069477778 | 1.049336779 |
| -0.057       | -0.085333333 | 0.069388889 | 1.049272128 |
| 0.1399       | 0.238466667  | 0.069333333 | 1.049231724 |
| -0.0109      | -0.08        | 0.0693      | 1.049207481 |
| 0.198733333  | 0.133366667  | 0.0693      | 1.049207481 |
| -0.062733333 | 0.188933333  | 0.069155556 | 1.049102439 |
| -0.049333333 | 0.0912       | 0.069133333 | 1.049086279 |
| 0.011733333  | 0.0849       | 0.069111111 | 1.04907012  |

|              |              |             |             |
|--------------|--------------|-------------|-------------|
| 0.015333333  | -0.0929      | 0.069077778 | 1.049045882 |
| 0.0858       | -0.2869      | 0.069055556 | 1.049029723 |
| -0.015033333 | 0.100333333  | 0.068922222 | 1.048932777 |
| -0.170566667 | -0.068633333 | 0.068866667 | 1.048892385 |
| 0.0715       | 0.1969       | 0.068777778 | 1.048827761 |
| 0.0057       | 0.131733333  | 0.068755556 | 1.048811606 |
| -0.0099      | 0.017833333  | 0.068666667 | 1.048746988 |
| 0.166966667  | 0.120933333  | 0.0686      | 1.048698526 |
| -0.018033333 | -0.0794      | 0.068544444 | 1.048658144 |
| 0.060933333  | 0.060233333  | 0.068533333 | 1.048650067 |
| 0.121533333  | -0.014866667 | 0.068422222 | 1.048569307 |
| 0.0807       | 0.031233333  | 0.068366667 | 1.048528929 |
| -0.051333333 | 0.0333       | 0.068355556 | 1.048520854 |
| -0.020266667 | 0.141333333  | 0.068333333 | 1.048504704 |
| 0.003633333  | 0.138833333  | 0.068211111 | 1.04841588  |
| -0.039533333 | -0.0554      | 0.068144444 | 1.048367434 |
| -0.0459      | -0.066866667 | 0.067888889 | 1.048181745 |
| -0.034933333 | -0.0411      | 0.067811111 | 1.048125238 |
| 0.096433333  | -0.000533333 | 0.0678      | 1.048117166 |
| 0.1658       | 0.027766667  | 0.067711111 | 1.04805259  |
| 0.181033333  | 0.120033333  | 0.067622222 | 1.047988018 |
| 0.122833333  | -0.3462      | 0.067611111 | 1.047979947 |
| 0.014866667  | 0.131033333  | 0.067611111 | 1.047979947 |
| 0.066333333  | 0.226033333  | 0.067555556 | 1.047939592 |
| 0.0916       | 0.179666667  | 0.067533333 | 1.04792345  |
| 0.1415       | 0.074866667  | 0.067322222 | 1.047770118 |
| 0.0587       | -0.063733333 | 0.067277778 | 1.04773784  |
| -0.043633333 | 0.051533333  | 0.0671      | 1.047608739 |
| 0.159133333  | 0.065566667  | 0.067033333 | 1.047560331 |
| 0.084366667  | -0.026033333 | 0.066988889 | 1.047528059 |
| 0.144566667  | 0.011666667  | 0.066955556 | 1.047503857 |
| -0.061733333 | 0.091766667  | 0.066911111 | 1.047471587 |
| 0.0346       | 0.186966667  | 0.066844444 | 1.047423185 |
| -0.087266667 | -0.107466667 | 0.066755556 | 1.047358652 |
| 0.054066667  | 0.061933333  | 0.066755556 | 1.047358652 |
| -0.0361      | 0.017866667  | 0.066644444 | 1.047277991 |
| 0.286866667  | 0.372533333  | 0.066622222 | 1.04726186  |
| -0.035766667 | -0.105566667 | 0.066622222 | 1.04726186  |
| -0.116733333 | 0.116033333  | 0.066577778 | 1.047229598 |
| -0.0867      | -0.191       | 0.066566667 | 1.047221532 |
| 0.016266667  | 0.002933333  | 0.066533333 | 1.047197337 |
| 0.014033333  | -0.041133333 | 0.066522222 | 1.047189272 |
| -0.099       | -0.079166667 | 0.066366667 | 1.047076367 |
| -0.191066667 | 0.048566667  | 0.066333333 | 1.047052174 |
| 0.065066667  | -0.295766667 | 0.066188889 | 1.046947348 |
| 0.022433333  | 0.1466       | 0.066166667 | 1.046931221 |
| 0.104866667  | 0.1455       | 0.066044444 | 1.046842531 |

|              |              |             |             |
|--------------|--------------|-------------|-------------|
| 0.130033333  | 0.224566667  | 0.066022222 | 1.046826406 |
| -0.0034      | 0.059866667  | 0.066       | 1.046810282 |
| -0.064733333 | -0.100633333 | 0.065933333 | 1.04676191  |
| -0.031933333 | 0.069866667  | 0.065933333 | 1.04676191  |
| 0.0414       | -0.098533333 | 0.065788889 | 1.046657112 |
| 0.226033333  | 0.1749       | 0.065744444 | 1.046624869 |
| -0.0616      | 0.076333333  | 0.065633333 | 1.046544265 |
| 0.1292       | 0.166166667  | 0.065588889 | 1.046512025 |
| -0.1797      | -0.0522      | 0.065555556 | 1.046487846 |
| -0.024133333 | 0.031366667  | 0.065544444 | 1.046479786 |
| -0.104666667 | -0.0479      | 0.065522222 | 1.046463667 |
| -0.061633333 | 0.029066667  | 0.065488889 | 1.046439489 |
| 0.041233333  | 0.045733333  | 0.065488889 | 1.046439489 |
| -0.056733333 | 0.0148       | 0.0654      | 1.046375016 |
| 0.105166667  | 0.0679       | 0.0653      | 1.04630249  |
| -0.067833333 | -0.065133333 | 0.065133333 | 1.046181623 |
| 0.0672       | 0.089666667  | 0.0648      | 1.045939932 |
| -0.178166667 | -0.137033333 | 0.064766667 | 1.045915766 |
| 0.079333333  | 0.1361       | 0.064744444 | 1.045899655 |
| 0.067333333  | -0.016966667 | 0.064711111 | 1.04587549  |
| 0.112033333  | 0.028066667  | 0.064622222 | 1.045811052 |
| 0.015833333  | 0.092033333  | 0.064588889 | 1.045786889 |
| 0.1216       | 0.1244       | 0.064477778 | 1.04570635  |
| -0.129766667 | 0.006333333  | 0.064477778 | 1.04570635  |
| -0.004366667 | -0.063666667 | 0.064433333 | 1.045674136 |
| 0.039366667  | -0.039133333 | 0.064411111 | 1.045658029 |
| 0.0396       | -0.170266667 | 0.0644      | 1.045649976 |
| -0.026366667 | 0.0289       | 0.0644      | 1.045649976 |
| 0.0814       | 0.036933333  | 0.064366667 | 1.045625816 |
| 0.296933333  | -0.0227      | 0.064311111 | 1.045585552 |
| -0.102533333 | -0.030333333 | 0.064288889 | 1.045569447 |
| 0.104833333  | 0.057866667  | 0.064266667 | 1.045553342 |
| 0.109966667  | 0.2047       | 0.064111111 | 1.045440613 |
| 0.169666667  | 0.026733333  | 0.064088889 | 1.04542451  |
| 0.196366667  | -0.080466667 | 0.064       | 1.0453601   |
| -0.0111      | 0.191066667  | 0.063955556 | 1.045327897 |
| 0.105166667  | -0.0666      | 0.0639      | 1.045287644 |
| 0.112933333  | 0.004366667  | 0.063888889 | 1.045279593 |
| 0.0318       | -0.0102      | 0.063877778 | 1.045271543 |
| 0.379866667  | 0.287633333  | 0.063833333 | 1.045239342 |
| -0.073433333 | 0.099933333  | 0.063744444 | 1.045174944 |
| 0.1685       | 0.037933333  | 0.063733333 | 1.045166894 |
| 0.131933333  | -0.052466667 | 0.063688889 | 1.045134697 |
| 0.0247       | -0.028966667 | 0.063644444 | 1.045102501 |
| 0.0561       | 0.201433333  | 0.063622222 | 1.045086403 |
| 0.233333333  | 0.113633333  | 0.063533333 | 1.045022014 |
| 0.081766667  | 0.2153       | 0.063477778 | 1.044981773 |



|              |              |             |             |
|--------------|--------------|-------------|-------------|
| 0.065233333  | 0.278166667  | 0.0634      | 1.044925438 |
| 0.048266667  | -0.014233333 | 0.063322222 | 1.044869106 |
| 0.200266667  | -0.056166667 | 0.0633      | 1.044853011 |
| -0.050766667 | -0.092466667 | 0.0633      | 1.044853011 |
| 0.402866667  | -0.014733333 | 0.063288889 | 1.044844964 |
| 0.0213       | 0.082766667  | 0.063233333 | 1.04480473  |
| 0.0014       | 0.177366667  | 0.063222222 | 1.044796683 |
| 0.158433333  | 0.248266667  | 0.0632      | 1.04478059  |
| -0.0053      | -0.123466667 | 0.063133333 | 1.044732312 |
| 0.0293       | -0.030666667 | 0.063088889 | 1.044700128 |
| 0.021333333  | 0.056766667  | 0.063066667 | 1.044684036 |
| -0.122       | 0.024733333  | 0.063011111 | 1.044643808 |
| -0.025033333 | -0.0071      | 0.063       | 1.044635763 |
| -0.0357      | -0.183466667 | 0.062744444 | 1.044450735 |
| 0.007866667  | 0.0202       | 0.062666667 | 1.044394429 |
| -0.263166667 | -0.433533333 | 0.062588889 | 1.044338125 |
| 0.055        | -0.399566667 | 0.062555556 | 1.044313996 |
| 0.1499       | 0.094866667  | 0.062477778 | 1.044257697 |
| 0.050033333  | 0.0515       | 0.062477778 | 1.044257697 |
| 0.0674       | -0.0132      | 0.062455556 | 1.044241612 |
| 0.1532       | -0.037833333 | 0.062433333 | 1.044225528 |
| -0.067533333 | 0.062066667  | 0.062166667 | 1.044032532 |
| 0.071366667  | 0.054433333  | 0.062055556 | 1.043952127 |
| 0.009566667  | -0.0408      | 0.062011111 | 1.043919967 |
| 0.116166667  | 0.038766667  | 0.062       | 1.043911927 |
| 0.0204       | 0.034566667  | 0.061977778 | 1.043895848 |
| 0.010966667  | 0.1198       | 0.061955556 | 1.043879769 |
| 0.177633333  | -0.108033333 | 0.061866667 | 1.043815454 |
| -0.009933333 | 0.082366667  | 0.061833333 | 1.043791337 |
| 0.1677       | 0.079966667  | 0.061788889 | 1.043759182 |
| -0.113333333 | 0.005666667  | 0.061744444 | 1.043727028 |
| -0.153833333 | -0.1262      | 0.061711111 | 1.043702913 |
| 0.057366667  | 0.138266667  | 0.061711111 | 1.043702913 |
| 0.032066667  | -0.023666667 | 0.061711111 | 1.043702913 |
| 0.118233333  | 0.0467       | 0.0617      | 1.043694875 |
| -0.1803      | -0.287366667 | 0.061633333 | 1.043646647 |
| 0.004133333  | 0.002833333  | 0.061588889 | 1.043614496 |
| 0.036933333  | 0.217533333  | 0.061588889 | 1.043614496 |
| 0.0317       | 0.092133333  | 0.061544444 | 1.043582346 |
| 0.056933333  | -0.051133333 | 0.0615      | 1.043550198 |
| -0.031733333 | -0.066033333 | 0.061311111 | 1.043413577 |
| 0.063433333  | 0.244333333  | 0.061277778 | 1.043389469 |
| 0.142966667  | 0.084633333  | 0.061244444 | 1.043365362 |
| 0.0976       | 0.173033333  | 0.0612      | 1.04333322  |
| 0.163533333  | -0.1781      | 0.061133333 | 1.043285009 |
| 0.095866667  | 0.155666667  | 0.060988889 | 1.043180559 |
| -0.063       | 0.145233333  | 0.060977778 | 1.043172525 |

|              |              |             |             |
|--------------|--------------|-------------|-------------|
| 0.096133333  | 0.1506       | 0.060922222 | 1.043132355 |
| 0.1732       | 0.140866667  | 0.0608      | 1.043043987 |
| 0.237233333  | 0.2002       | 0.0608      | 1.043043987 |
| -0.0323      | -0.009533333 | 0.060733333 | 1.042995789 |
| 0.001166667  | -0.165233333 | 0.060611111 | 1.042907432 |
| 0.124333333  | 0.023166667  | 0.060288889 | 1.042674528 |
| -0.060733333 | 0.096733333  | 0.060266667 | 1.042658467 |
| -0.002166667 | 0.040633333  | 0.060255556 | 1.042650437 |
| 0.135966667  | -0.043966667 | 0.060144444 | 1.042570139 |
| 0.126966667  | 0.0371       | 0.0601      | 1.042538022 |
| 0.009833333  | -0.025466667 | 0.060077778 | 1.042521963 |
| 0.0526       | 0.090866667  | 0.060033333 | 1.042489847 |
| -0.119433333 | 0.2434       | 0.060011111 | 1.04247379  |
| -0.0842      | -0.1524      | 0.059944444 | 1.042425618 |
| -0.022766667 | 0.021766667  | 0.059877778 | 1.042377449 |
| 0.0441       | -0.010266667 | 0.059866667 | 1.042369421 |
| -0.0715      | -0.092       | 0.059711111 | 1.042257036 |
| -0.0587      | 0.015666667  | 0.059677778 | 1.042232955 |
| 0.042066667  | 0.150066667  | 0.059633333 | 1.042200848 |
| 0.053833333  | 0.360566667  | 0.059544444 | 1.042136636 |
| 0.024066667  | 0.1675       | 0.059455556 | 1.042072429 |
| -0.001       | 0.175166667  | 0.059255556 | 1.041927977 |
| 0.025933333  | 0.156        | 0.059222222 | 1.041903904 |
| -0.041666667 | 0.128066667  | 0.059177778 | 1.041871807 |
| 0.052366667  | -0.0295      | 0.059177778 | 1.041871807 |
| 0.1152       | 0.085766667  | 0.059088889 | 1.041807616 |
| -0.1256      | -0.2617      | 0.059       | 1.041743429 |
| 0.018466667  | -0.112466667 | 0.058955556 | 1.041711337 |
| 0.005933333  | -0.001666667 | 0.058755556 | 1.041566935 |
| 0.043033333  | 0.016266667  | 0.0587      | 1.041526827 |
| 0.0113       | 0.0625       | 0.058655556 | 1.041494742 |
| -0.0086      | -0.0253      | 0.058644444 | 1.041486721 |
| 0.018133333  | 0.067733333  | 0.058588889 | 1.041446616 |
| 0.0304       | 0.0074       | 0.058588889 | 1.041446616 |
| 0.116133333  | 0.011466667  | 0.058544444 | 1.041414533 |
| 0.1042       | 0.0674       | 0.0585      | 1.041382451 |
| 0.074433333  | 0.0463       | 0.058455556 | 1.04135037  |
| 0.033066667  | -0.036933333 | 0.0584      | 1.04131027  |
| 0.0391       | 0.0356       | 0.058255556 | 1.041206018 |
| 0.242833333  | -0.057166667 | 0.058211111 | 1.041173943 |
| -0.263166667 | 0.055466667  | 0.058211111 | 1.041173943 |
| -0.110633333 | -0.0625      | 0.058155556 | 1.04113385  |
| 0.403466667  | -6.67E-05    | 0.058133333 | 1.041117813 |
| 0.117266667  | 0.1356       | 0.0581      | 1.041093758 |
| -0.0693      | -0.049733333 | 0.0581      | 1.041093758 |
| 0.0538       | -0.567833333 | 0.058055556 | 1.041061686 |
| 0.072333333  | -0.041333333 | 0.058055556 | 1.041061686 |

|              |              |             |             |
|--------------|--------------|-------------|-------------|
| 0.054        | 0.134133333  | 0.058       | 1.041021598 |
| -0.069       | -0.1641      | 0.057944444 | 1.040981511 |
| -0.0879      | -0.042933333 | 0.057822222 | 1.040893324 |
| 0.147733333  | 0.023        | 0.0578      | 1.040877291 |
| 0.0688       | 0.157066667  | 0.057766667 | 1.040853242 |
| 0.082366667  | 0.047        | 0.057744444 | 1.04083721  |
| 0.1454       | 0.008266667  | 0.057744444 | 1.04083721  |
| -0.267266667 | -0.116833333 | 0.057711111 | 1.040813162 |
| 0.107766667  | -0.076833333 | 0.057677778 | 1.040789114 |
| 0.040033333  | 0.002266667  | 0.057677778 | 1.040789114 |
| 0.1572       | 0.008466667  | 0.057655556 | 1.040773083 |
| 0.0577       | -0.067766667 | 0.057622222 | 1.040749036 |
| 0.304866667  | 0.056433333  | 0.057588889 | 1.04072499  |
| -0.180066667 | -0.0738      | 0.0575      | 1.04066087  |
| -0.0889      | -0.039566667 | 0.057433333 | 1.040612782 |
| 0.104866667  | 0.1348       | 0.057422222 | 1.040604768 |
| 0.054533333  | 0.0142       | 0.057266667 | 1.040492573 |
| 0.083366667  | -0.596066667 | 0.057255556 | 1.040484559 |
| -0.1096      | 0.043666667  | 0.0572      | 1.040444493 |
| -0.049066667 | -0.075933333 | 0.0572      | 1.040444493 |
| 0.146066667  | -0.299366667 | 0.057077778 | 1.040356352 |
| 0.153        | 0.024633333  | 0.057033333 | 1.040324303 |
| 0.0227       | -0.1935      | 0.056966667 | 1.040276231 |
| -0.1894      | -0.1185      | 0.056966667 | 1.040276231 |
| 0.218333333  | -0.059766667 | 0.056722222 | 1.040099985 |
| 0.403433333  | 0.242666667  | 0.056677778 | 1.040067944 |
| -0.215166667 | 0.0431       | 0.056644444 | 1.040043914 |
| -0.046333333 | -0.087633333 | 0.056622222 | 1.040027894 |
| 0.010366667  | 0.062466667  | 0.056555556 | 1.039979835 |
| -0.03        | 0.042466667  | 0.0564      | 1.039867708 |
| 0.0803       | 0.0528       | 0.056388889 | 1.039859699 |
| -0.096033333 | -0.0279      | 0.056377778 | 1.039851691 |
| 0.009533333  | -0.039833333 | 0.056355556 | 1.039835674 |
| 0.041366667  | -0.0514      | 0.056311111 | 1.03980364  |
| 0.0607       | 0.0492       | 0.056233333 | 1.039747584 |
| 0.488933333  | -0.0229      | 0.056211111 | 1.039731569 |
| -0.030166667 | -0.043433333 | 0.056188889 | 1.039715554 |
| 0.175066667  | -0.035266667 | 0.056088889 | 1.039643489 |
| -0.1073      | -0.3016      | 0.055933333 | 1.039531398 |
| -0.020966667 | 0.1346       | 0.055911111 | 1.039515385 |
| 0.0767       | 0.132233333  | 0.055622222 | 1.039307251 |
| 0.0611       | 0.051166667  | 0.055611111 | 1.039299247 |
| -0.080666667 | -0.0241      | 0.055522222 | 1.039235214 |
| -0.095766667 | 0.024266667  | 0.055488889 | 1.039211203 |
| -0.004333333 | 0.0028       | 0.055477778 | 1.0392032   |
| 0.012033333  | 0.0334       | 0.055455556 | 1.039187193 |
| 0.021533333  | 0.0061       | 0.0553      | 1.03907515  |

|              |              |             |             |
|--------------|--------------|-------------|-------------|
| 0.139733333  | -0.055833333 | 0.055122222 | 1.038947117 |
| 0.154466667  | 0.1733       | 0.055122222 | 1.038947117 |
| 0.058933333  | -0.010033333 | 0.055111111 | 1.038939116 |
| -0.088833333 | -0.038       | 0.055088889 | 1.038923113 |
| 0.1547       | -0.033933333 | 0.055011111 | 1.038867104 |
| 0.013166667  | -0.017566667 | 0.054933333 | 1.038811099 |
| 0.024433333  | 0.060166667  | 0.054911111 | 1.038795098 |
| 0.186033333  | 0.0266       | 0.054711111 | 1.0386511   |
| 0.200666667  | 0.0482       | 0.054677778 | 1.038627103 |
| 0.055333333  | 0.120533333  | 0.054655556 | 1.038611105 |
| 0.295133333  | 0.043066667  | 0.054644444 | 1.038603106 |
| -0.021633333 | 0.038233333  | 0.054622222 | 1.038587108 |
| -0.024833333 | 0.049333333  | 0.054622222 | 1.038587108 |
| 0.048166667  | 0.082766667  | 0.054611111 | 1.038579109 |
| 0.0543       | -0.025766667 | 0.054544444 | 1.038531118 |
| -0.070966667 | -0.058066667 | 0.054477778 | 1.038483128 |
| 0.038633333  | -0.051833333 | 0.054455556 | 1.038467132 |
| 0.1237       | 0.045066667  | 0.054411111 | 1.038435141 |
| 0.158433333  | 0.0172       | 0.054366667 | 1.038403151 |
| 0.161766667  | -0.0329      | 0.054311111 | 1.038363165 |
| 0.053633333  | 0.0115       | 0.054144444 | 1.038243216 |
| 0.160166667  | -0.011066667 | 0.054133333 | 1.038235219 |
| 0.4013       | 0.423133333  | 0.054111111 | 1.038219227 |
| 0.073666667  | -0.037533333 | 0.053944444 | 1.038099294 |
| -0.064433333 | 0.032033333  | 0.053855556 | 1.038035336 |
| 0.153033333  | 0.1094       | 0.053722222 | 1.037939406 |
| -0.036133333 | 0.105833333  | 0.053577778 | 1.037835491 |
| 0.360833333  | -0.120033333 | 0.053533333 | 1.037803519 |
| 0.1019       | 0.034233333  | 0.053533333 | 1.037803519 |
| 0.0051       | -0.005433333 | 0.053511111 | 1.037787534 |
| 0.109333333  | 0.109633333  | 0.053511111 | 1.037787534 |
| 0.035066667  | -0.067633333 | 0.053466667 | 1.037755564 |
| 0.211733333  | -0.0218      | 0.053433333 | 1.037731587 |
| 0.112166667  | -6.67E-05    | 0.053377778 | 1.037691626 |
| -0.0735      | -0.014566667 | 0.053366667 | 1.037683634 |
| 0.159266667  | -0.7142      | 0.053333333 | 1.037659659 |
| 0.035933333  | 0.1557       | 0.053322222 | 1.037651668 |
| 0.1436       | -0.1204      | 0.053244444 | 1.037595728 |
| 0.0311       | 0.030333333  | 0.053188889 | 1.037555773 |
| 0.121733333  | 0.036466667  | 0.053155556 | 1.0375318   |
| 0.131533333  | -0.1614      | 0.053111111 | 1.037499838 |
| 0.281766667  | 0.098466667  | 0.053055556 | 1.037459886 |
| 0.011766667  | 0.040666667  | 0.053044444 | 1.037451896 |
| -0.166066667 | -0.029066667 | 0.053011111 | 1.037427926 |
| 0.1788       | 0.318766667  | 0.052988889 | 1.037411947 |
| 0.166        | -0.071633333 | 0.052955556 | 1.037387978 |
| 0.0403       | 0.134166667  | 0.052911111 | 1.03735602  |

|              |              |             |             |
|--------------|--------------|-------------|-------------|
| 0.011133333  | 0.0378       | 0.052744444 | 1.037236187 |
| 0.080966667  | -0.107733333 | 0.052688889 | 1.037196245 |
| 0.0416       | -0.188066667 | 0.052677778 | 1.037188257 |
| -0.018933333 | 0.089166667  | 0.052555556 | 1.037100393 |
| -0.110133333 | 0.0557       | 0.052533333 | 1.037084418 |
| -0.0504      | 0.036233333  | 0.052422222 | 1.037004549 |
| -0.284666667 | -0.019333333 | 0.052111111 | 1.036780947 |
| 0.026866667  | 0.097533333  | 0.051933333 | 1.036653196 |
| 0.029266667  | -0.1734      | 0.051922222 | 1.036645212 |
| -0.045733333 | -0.0157      | 0.051922222 | 1.036645212 |
| -0.0142      | 0.039233333  | 0.0519      | 1.036629245 |
| 0.021266667  | -0.0838      | 0.051844444 | 1.036589327 |
| -0.018533333 | 0.125933333  | 0.0517      | 1.036485547 |
| -0.029033333 | 0.097433333  | 0.051677778 | 1.036469582 |
| 0.212566667  | -0.0956      | 0.051622222 | 1.036429671 |
| 0.190966667  | 0.007566667  | 0.0516      | 1.036413706 |
| 0.105266667  | 0.1609       | 0.051588889 | 1.036405724 |
| 0.157533333  | -0.080433333 | 0.051577778 | 1.036397742 |
| 0.141633333  | 0.0286       | 0.051555556 | 1.036381778 |
| -0.098333333 | 0.0712       | 0.051544444 | 1.036373797 |
| 0.1252       | -0.062533333 | 0.051477778 | 1.036325907 |
| 0.008366667  | 0.0425       | 0.051455556 | 1.036309944 |
| 0.0268       | 0.033233333  | 0.051422222 | 1.036286001 |
| 0.051033333  | 0.170666667  | 0.0514      | 1.036270039 |
| -0.0043      | 0.017233333  | 0.051388889 | 1.036262058 |
| 0.139733333  | 0.113533333  | 0.051244444 | 1.036158311 |
| 0.0137       | -0.0428      | 0.051222222 | 1.036142351 |
| 0.089        | -0.021       | 0.051222222 | 1.036142351 |
| -0.057566667 | 0.092266667  | 0.051222222 | 1.036142351 |
| -0.0798      | -0.010866667 | 0.051177778 | 1.036110432 |
| -0.127533333 | -0.014433333 | 0.050966667 | 1.035958828 |
| 0.022266667  | 0.044        | 0.050933333 | 1.035934892 |
| -0.068133333 | -0.0177      | 0.050922222 | 1.035926914 |
| -0.108033333 | -0.054633333 | 0.050833333 | 1.035863089 |
| -0.323466667 | -0.206333333 | 0.050677778 | 1.035751405 |
| 0.172        | 0.165933333  | 0.050655556 | 1.035735451 |
| 0.069666667  | 0.007433333  | 0.0505      | 1.035623782 |
| -0.0768      | 0.260933333  | 0.050344444 | 1.035512124 |
| 0.1163       | 0.089233333  | 0.050066667 | 1.035312764 |
| -0.0152      | -0.185633333 | 0.050022222 | 1.03528087  |
| -0.006933333 | -0.025833333 | 0.049977778 | 1.035248977 |
| 0.0343       | 0.213633333  | 0.049977778 | 1.035248977 |
| 0.038933333  | -0.02        | 0.049888889 | 1.035185195 |
| -0.001666667 | 0.052133333  | 0.049744444 | 1.035081556 |
| 0.387133333  | -0.029333333 | 0.0497      | 1.035049669 |
| 0.060533333  | 0.014766667  | 0.049677778 | 1.035033726 |
| -0.2303      | -0.0224      | 0.0496      | 1.034977927 |

|              |              |             |             |
|--------------|--------------|-------------|-------------|
| 0.184833333  | -0.001966667 | 0.049522222 | 1.034922132 |
| 0.148766667  | -0.071466667 | 0.049488889 | 1.03489822  |
| 0.102533333  | 0.221        | 0.049477778 | 1.03489025  |
| 0.020933333  | 0.033766667  | 0.049444444 | 1.034866339 |
| 0.322866667  | 0.153066667  | 0.0494      | 1.034834459 |
| 0.1059       | -0.064       | 0.049366667 | 1.034810549 |
| -0.080233333 | -0.068233333 | 0.049366667 | 1.034810549 |
| -0.0129      | 0.1786       | 0.049344444 | 1.03479461  |
| 0.0184       | -0.0655      | 0.049333333 | 1.03478664  |
| 0.098566667  | 0.1754       | 0.049211111 | 1.034698979 |
| 0.134366667  | -0.0094      | 0.049077778 | 1.034603357 |
| 0.156633333  | -0.0421      | 0.049066667 | 1.034595389 |
| 0.1404       | 0.002166667  | 0.049011111 | 1.034555549 |
| -0.1833      | 0.266833333  | 0.048911111 | 1.034483842 |
| 0.0299       | 0.050366667  | 0.048755556 | 1.034372307 |
| -0.080566667 | 0.079466667  | 0.048744444 | 1.03436434  |
| 0.0286       | -0.050933333 | 0.0486      | 1.034260784 |
| 0.019766667  | -0.024366667 | 0.048544444 | 1.034220957 |
| 0.164266667  | 0.015633333  | 0.048488889 | 1.034181132 |
| 0.010633333  | -0.166033333 | 0.048388889 | 1.03410945  |
| -0.119066667 | 0.074266667  | 0.048388889 | 1.03410945  |
| -0.049833333 | -0.067166667 | 0.048355556 | 1.034085558 |
| 0.024666667  | 0.222733333  | 0.048311111 | 1.034053702 |
| -0.048733333 | 0.092233333  | 0.048277778 | 1.03402981  |
| 0.0431       | 0.031566667  | 0.048122222 | 1.033918324 |
| 0.181266667  | 0.1752       | 0.047966667 | 1.03380685  |
| 0.070033333  | 0.216933333  | 0.047944444 | 1.033790926 |
| 0.0155       | -0.0115      | 0.047888889 | 1.033751117 |
| -0.1439      | -0.105933333 | 0.047866667 | 1.033735194 |
| -0.080066667 | -0.112966667 | 0.047777778 | 1.033671505 |
| 0.1191       | -0.008       | 0.047766667 | 1.033663544 |
| -0.001633333 | 0.0536       | 0.047666667 | 1.033591898 |
| -0.0899      | -0.111933333 | 0.047633333 | 1.033568017 |
| -0.0419      | 0.127133333  | 0.047611111 | 1.033552097 |
| 0.095133333  | -0.065933333 | 0.047422222 | 1.033416785 |
| 0.144366667  | 0.008966667  | 0.047266667 | 1.033305365 |
| -0.1418      | -0.156       | 0.047233333 | 1.033281491 |
| -0.0191      | -0.0439      | 0.047233333 | 1.033281491 |
| 0.064933333  | 0.051133333  | 0.047155556 | 1.033225787 |
| -0.069166667 | 0.105833333  | 0.047133333 | 1.033209872 |
| -0.100766667 | 0.0701       | 0.0471      | 1.033186    |
| -0.0363      | -0.1488      | 0.046855556 | 1.033010956 |
| -0.005833333 | 0.2122       | 0.046822222 | 1.032987089 |
| -0.046733333 | -0.021533333 | 0.046811111 | 1.032979133 |
| -0.0644      | -0.076233333 | 0.0468      | 1.032971178 |
| 0.1118       | -0.016       | 0.046788889 | 1.032963222 |
| 0.096366667  | 0.0491       | 0.046644444 | 1.032859806 |

|              |              |             |             |
|--------------|--------------|-------------|-------------|
| 0.1157       | -0.043633333 | 0.046577778 | 1.032812078 |
| 0.0508       | 0.017366667  | 0.046577778 | 1.032812078 |
| 0.090166667  | 0.110833333  | 0.046566667 | 1.032804124 |
| 0.0331       | 0.1386       | 0.046522222 | 1.032772308 |
| 0.129633333  | -0.141733333 | 0.0465      | 1.0327564   |
| -0.132233333 | 0.166866667  | 0.046344444 | 1.032645051 |
| 0.252066667  | -0.049033333 | 0.046333333 | 1.032637098 |
| -0.019766667 | 0.028166667  | 0.046277778 | 1.032597334 |
| -0.221266667 | -0.1243      | 0.046266667 | 1.032589381 |
| 0.0331       | -0.047933333 | 0.046255556 | 1.032581428 |
| 0.163333333  | -0.016166667 | 0.046022222 | 1.032414438 |
| -0.0087      | 0.139533333  | 0.045933333 | 1.03235083  |
| 0.120466667  | -0.0921      | 0.045877778 | 1.032311076 |
| 0.006266667  | 0.125833333  | 0.045811111 | 1.032263375 |
| 0.179366667  | 0.0426       | 0.045788889 | 1.032247475 |
| 0.040133333  | 0.0916       | 0.045777778 | 1.032239525 |
| 0.190333333  | -0.051266667 | 0.045755556 | 1.032223625 |
| -0.072466667 | -0.1317      | 0.045722222 | 1.032199776 |
| 0.045933333  | 0.007666667  | 0.045722222 | 1.032199776 |
| 0.392366667  | 0.016933333  | 0.0457      | 1.032183877 |
| 0.1231       | -0.0542      | 0.0457      | 1.032183877 |
| 0.0401       | 0.009233333  | 0.045688889 | 1.032175927 |
| -0.072766667 | -0.073966667 | 0.045633333 | 1.032136181 |
| -0.0974      | 0.038633333  | 0.0456      | 1.032112334 |
| -0.0733      | -0.138066667 | 0.045577778 | 1.032096436 |
| -0.074766667 | -0.015266667 | 0.0455      | 1.032040795 |
| 0.093333333  | 0.167233333  | 0.045488889 | 1.032032847 |
| -0.0093      | 0.045266667  | 0.045433333 | 1.031993106 |
| 0.265266667  | 0.1543       | 0.0454      | 1.031969262 |
| -0.0861      | -0.04        | 0.045377778 | 1.031953367 |
| 0.0416       | -0.082633333 | 0.045377778 | 1.031953367 |
| 0.009033333  | 0.0825       | 0.045322222 | 1.031913629 |
| -0.1991      | -0.063066667 | 0.045144444 | 1.031786478 |
| 0.129133333  | 0.061866667  | 0.0451      | 1.031754693 |
| -0.0356      | 0.120866667  | 0.045077778 | 1.0317388   |
| -0.1325      | 0.263333333  | 0.045066667 | 1.031730854 |
| 0.036666667  | -0.043766667 | 0.045055556 | 1.031722908 |
| -0.108066667 | 0.103        | 0.045033333 | 1.031707017 |
| 0.050166667  | 0.017333333  | 0.044977778 | 1.031667288 |
| 0.2857       | 0.053866667  | 0.044966667 | 1.031659343 |
| -0.177533333 | -0.231333333 | 0.044944444 | 1.031643452 |
| -0.023066667 | 0.183033333  | 0.044911111 | 1.031619616 |
| 0.064166667  | -0.4191      | 0.044877778 | 1.031595781 |
| 0.0733       | 0.201733333  | 0.044822222 | 1.031556057 |
| 0.103033333  | 0.012566667  | 0.044711111 | 1.031476613 |
| 0.003166667  | 0.019966667  | 0.0447      | 1.031468669 |
| 0.190066667  | 0.0478       | 0.044677778 | 1.031452781 |

|              |              |             |             |
|--------------|--------------|-------------|-------------|
| -0.0689      | 0.006333333  | 0.044588889 | 1.031389232 |
| -0.0813      | 0.110133333  | 0.044555556 | 1.031365402 |
| 0.098066667  | 0.136866667  | 0.044533333 | 1.031349516 |
| 0.024233333  | -0.062033333 | 0.044533333 | 1.031349516 |
| -0.015966667 | 0.232933333  | 0.0445      | 1.031325687 |
| 0.080333333  | 0.0431       | 0.044455556 | 1.031293916 |
| -0.010066667 | 0.068233333  | 0.044411111 | 1.031262146 |
| 0.085833333  | 0.021233333  | 0.044344444 | 1.031214493 |
| 0.198533333  | -0.008933333 | 0.044233333 | 1.031135075 |
| 0.151633333  | 0.000733333  | 0.0442      | 1.031111251 |
| 0.0595       | 0.111733333  | 0.044077778 | 1.031023901 |
| -0.002566667 | -0.034066667 | 0.044011111 | 1.030976259 |
| -0.184833333 | -0.012566667 | 0.043944444 | 1.030928619 |
| 0.1431       | -0.038333333 | 0.043877778 | 1.030880981 |
| -0.009666667 | -0.071233333 | 0.0438      | 1.030825406 |
| 0.0293       | -0.208666667 | 0.043766667 | 1.030801589 |
| -0.0753      | -6.00E-04    | 0.043688889 | 1.030746019 |
| -0.025466667 | 0.101966667  | 0.043644444 | 1.030714266 |
| 0.2475       | -0.1483      | 0.043611111 | 1.030690451 |
| -0.161       | 0.026933333  | 0.043533333 | 1.030634887 |
| -0.192533333 | -0.094933333 | 0.043444444 | 1.030571388 |
| 0.0024       | 0.126666667  | 0.043366667 | 1.03051583  |
| 0.159566667  | 0.081333333  | 0.043333333 | 1.03049202  |
| 0.243333333  | 0.0767       | 0.043244444 | 1.03042853  |
| -0.060066667 | 0.0234       | 0.043177778 | 1.030380916 |
| 0.1182       | 0.300366667  | 0.043144444 | 1.030357109 |
| -0.0566      | -0.136533333 | 0.042922222 | 1.030198413 |
| 0.026833333  | 0.0656       | 0.0429      | 1.030182544 |
| -0.023233333 | 0.1119       | 0.042888889 | 1.03017461  |
| 0.020433333  | -0.201733333 | 0.042866667 | 1.030158742 |
| 0.234433333  | 0.281433333  | 0.042777778 | 1.030095273 |
| 0.007433333  | 0.141066667  | 0.042711111 | 1.030047674 |
| 0.212333333  | 0.043966667  | 0.042644444 | 1.030000076 |
| -0.056566667 | 0.0849       | 0.042633333 | 1.029992144 |
| -0.013733333 | 0.010466667  | 0.042577778 | 1.029952481 |
| -0.275966667 | 0.0409       | 0.042577778 | 1.029952481 |
| 0.015866667  | 0.007566667  | 0.042566667 | 1.029944549 |
| 0.072166667  | 0.042333333  | 0.042566667 | 1.029944549 |
| 0.1385       | -0.061466667 | 0.042555556 | 1.029936617 |
| -0.044466667 | -0.045266667 | 0.042522222 | 1.029912821 |
| -0.1128      | -0.008066667 | 0.042477778 | 1.029881093 |
| 0.047566667  | -0.040133333 | 0.042388889 | 1.029817641 |
| 0.102933333  | 0.050933333  | 0.042333333 | 1.029777985 |
| 0.069166667  | 0.031466667  | 0.042177778 | 1.029666958 |
| -0.0439      | -0.0436      | 0.0421      | 1.029611448 |
| -0.031933333 | -0.000433333 | 0.042055556 | 1.02957973  |
| 0.018166667  | 0.099433333  | 0.042044444 | 1.0295718   |



|              |              |             |             |
|--------------|--------------|-------------|-------------|
| -0.015333333 | 0.076166667  | 0.042044444 | 1.0295718   |
| -0.0506      | 0.009966667  | 0.041966667 | 1.029516296 |
| 0.124766667  | 0.0521       | 0.041955556 | 1.029508367 |
| -0.016566667 | 0.0344       | 0.041944444 | 1.029500438 |
| 0.052466667  | 0.046        | 0.041911111 | 1.029476652 |
| 0.0554       | 0.050133333  | 0.041888889 | 1.029460795 |
| 0.052833333  | 0.0773       | 0.041855556 | 1.02943701  |
| -0.1649      | 0.072333333  | 0.041844444 | 1.029429081 |
| -0.017433333 | -0.021866667 | 0.041733333 | 1.029349802 |
| 0.178966667  | 0.117666667  | 0.041644444 | 1.029286382 |
| 0.1191       | 0.124733333  | 0.041588889 | 1.029246747 |
| 0.1181       | 0.003        | 0.041477778 | 1.029167481 |
| 0.0818       | -0.0186      | 0.041466667 | 1.029159555 |
| -0.1214      | -0.029333333 | 0.041366667 | 1.029088222 |
| -0.0092      | -0.0204      | 0.041266667 | 1.029016893 |
| 0.188733333  | 0.0698       | 0.0412      | 1.028969343 |
| 0.0808       | 0.164466667  | 0.0412      | 1.028969343 |
| 0.130566667  | 0.0675       | 0.041144444 | 1.02892972  |
| 0.068233333  | 0.038733333  | 0.041       | 1.028826708 |
| 0.1146       | 0.100466667  | 0.040977778 | 1.028810861 |
| 0.014766667  | 0.0921       | 0.040944444 | 1.02878709  |
| 0.080366667  | -0.054933333 | 0.040922222 | 1.028771244 |
| -0.016933333 | -0.050966667 | 0.040788889 | 1.02867617  |
| 0.055133333  | 0.003166667  | 0.040711111 | 1.028620714 |
| -0.097       | 0.051        | 0.040622222 | 1.028557339 |
| -0.063233333 | -0.125033333 | 0.040477778 | 1.028454364 |
| -0.007633333 | -0.059333333 | 0.040444444 | 1.028430602 |
| -0.082333333 | 0.047133333  | 0.040344444 | 1.028359319 |
| 0.3212       | -0.0967      | 0.040322222 | 1.028343479 |
| 0.011933333  | 0.0939       | 0.040244444 | 1.028288041 |
| 0.0893       | -0.093666667 | 0.040222222 | 1.028272202 |
| 0.0297       | 0.032766667  | 0.040211111 | 1.028264283 |
| -0.0409      | -0.0696      | 0.040177778 | 1.028240525 |
| 0.1197       | 0.1839       | 0.040155556 | 1.028224687 |
| -0.075133333 | 0.0449       | 0.040111111 | 1.028193011 |
| -0.226766667 | -0.086633333 | 0.040088889 | 1.028177174 |
| 0.012133333  | -0.1249      | 0.040055556 | 1.028153418 |
| 0.156766667  | 0.007766667  | 0.040055556 | 1.028153418 |
| 0.151033333  | 0.1369       | 0.040033333 | 1.028137581 |
| -0.091033333 | 0.0465       | 0.039888889 | 1.028034648 |
| -0.1009      | -0.005866667 | 0.039888889 | 1.028034648 |
| 0.038066667  | -0.046766667 | 0.039611111 | 1.027836728 |
| 0.007766667  | 0.063966667  | 0.039511111 | 1.027765487 |
| 0.052166667  | 0.3494       | 0.039511111 | 1.027765487 |
| 0.034533333  | 0.118933333  | 0.039477778 | 1.027741741 |
| 0.062933333  | -0.2175      | 0.039388889 | 1.02767842  |
| -0.047       | 0.024566667  | 0.039355556 | 1.027654676 |

|              |              |             |             |
|--------------|--------------|-------------|-------------|
| 0.026366667  | -0.027966667 | 0.039288889 | 1.027607189 |
| 0.262566667  | 0.284533333  | 0.039144444 | 1.027504309 |
| -0.017733333 | -0.061833333 | 0.039133333 | 1.027496396 |
| -0.129433333 | -0.016366667 | 0.039111111 | 1.027480569 |
| -0.115566667 | 0.024866667  | 0.039111111 | 1.027480569 |
| 0.0252       | 0.1621       | 0.038844444 | 1.027290668 |
| -0.0647      | -0.094366667 | 0.038822222 | 1.027274844 |
| -0.046166667 | 0.0618       | 0.038788889 | 1.02725111  |
| -0.085133333 | 0.062733333  | 0.038722222 | 1.027203642 |
| 0.011966667  | 0.029466667  | 0.038622222 | 1.027132444 |
| -0.212033333 | -0.229733333 | 0.038555556 | 1.027084981 |
| 0.012866667  | 0.131566667  | 0.038522222 | 1.027061251 |
| -0.030133333 | -0.0407      | 0.038488889 | 1.027037521 |
| -0.128366667 | 0.131233333  | 0.038477778 | 1.027029611 |
| -0.0707      | 0.071133333  | 0.038411111 | 1.026982153 |
| -0.032766667 | -0.080366667 | 0.038288889 | 1.026895153 |
| -0.015633333 | -0.0072      | 0.038122222 | 1.026776528 |
| -0.030366667 | -0.1158      | 0.038       | 1.026689546 |
| 0.0615       | 0.094266667  | 0.037922222 | 1.026634197 |
| -0.095766667 | -0.1114      | 0.037866667 | 1.026594664 |
| 0.066033333  | -0.043966667 | 0.0378      | 1.026547226 |
| -0.4668      | -0.5997      | 0.037788889 | 1.02653932  |
| 0.0732       | -0.201       | 0.037733333 | 1.026499791 |
| 0.049966667  | 0.022433333  | 0.037722222 | 1.026491885 |
| -0.144066667 | -0.056566667 | 0.037677778 | 1.026460263 |
| -0.0286      | -0.006233333 | 0.037622222 | 1.026420737 |
| 0.642166667  | -0.122233333 | 0.0376      | 1.026404926 |
| 0.085166667  | -0.069466667 | 0.037588889 | 1.026397021 |
| -0.0374      | 0.0399       | 0.037555556 | 1.026373307 |
| -0.009966667 | -0.014466667 | 0.037555556 | 1.026373307 |
| 0.240266667  | -0.2892      | 0.037533333 | 1.026357498 |
| 0.043033333  | -0.038166667 | 0.037522222 | 1.026349593 |
| 0.159966667  | -0.205133333 | 0.037466667 | 1.026310071 |
| 0.0151       | 0.051333333  | 0.037311111 | 1.026199417 |
| -0.004466667 | 0.080666667  | 0.037288889 | 1.02618361  |
| 0.0785       | 0.0306       | 0.037277778 | 1.026175707 |
| 0.0871       | 0.153633333  | 0.037233333 | 1.026144095 |
| 0.073        | 0.0938       | 0.037166667 | 1.026096678 |
| -0.039533333 | -0.031566667 | 0.037133333 | 1.02607297  |
| 0.135766667  | 0.0804       | 0.037111111 | 1.026057165 |
| 0.025833333  | -0.0938      | 0.036977778 | 1.025962342 |
| -0.017766667 | 0.049766667  | 0.036933333 | 1.025930736 |
| -0.0298      | 0.114866667  | 0.036888889 | 1.025899131 |
| -0.059833333 | -0.204466667 | 0.036777778 | 1.025820123 |
| -0.026266667 | -0.069266667 | 0.036755556 | 1.025804322 |
| 0.092066667  | 0.224333333  | 0.036622222 | 1.025709522 |
| 0.015333333  | 0.034333333  | 0.036611111 | 1.025701623 |

|              |              |             |             |
|--------------|--------------|-------------|-------------|
| -0.0337      | -0.0296      | 0.036488889 | 1.025614731 |
| -0.170133333 | 0.0348       | 0.036433333 | 1.025575237 |
| 0.0338       | -0.135266667 | 0.0364      | 1.025551542 |
| 0.145533333  | -0.083566667 | 0.036066667 | 1.025314616 |
| 0.129966667  | 0.0072       | 0.036011111 | 1.025275134 |
| 0.123433333  | -0.048533333 | 0.035977778 | 1.025251446 |
| 0.077033333  | 0.104033333  | 0.035844444 | 1.025156697 |
| 0.0521       | 0.043366667  | 0.035744444 | 1.025085641 |
| -0.023566667 | -0.1802      | 0.035633333 | 1.025006695 |
| 0.074533333  | -0.0381      | 0.035522222 | 1.024927756 |
| 0.0186       | -0.014066667 | 0.035511111 | 1.024919862 |
| -0.0234      | -0.042766667 | 0.035477778 | 1.024896182 |
| -0.1049      | -0.082466667 | 0.035455556 | 1.024880395 |
| -0.068366667 | 0.3097       | 0.035455556 | 1.024880395 |
| -0.287266667 | 0.032966667  | 0.035288889 | 1.024762003 |
| 0.119033333  | 0.015066667  | 0.035288889 | 1.024762003 |
| -0.0856      | -0.046166667 | 0.035222222 | 1.02471465  |
| 0.008566667  | -0.177133333 | 0.0351      | 1.024627842 |
| -0.143166667 | -0.112333333 | 0.035066667 | 1.024604169 |
| 0.103866667  | -0.054333333 | 0.035       | 1.024556823 |
| 0.027533333  | 0.1173       | 0.034977778 | 1.024541042 |
| 0.010233333  | -0.050566667 | 0.034944444 | 1.02451737  |
| -0.156666667 | 0.038333333  | 0.034944444 | 1.02451737  |
| 0.066033333  | 0.009666667  | 0.034933333 | 1.02450948  |
| 0.0879       | 0.0478       | 0.034877778 | 1.024470028 |
| 0.001866667  | -0.014766667 | 0.034877778 | 1.024470028 |
| 0.213666667  | 0.200433333  | 0.034877778 | 1.024470028 |
| -0.130733333 | -0.143033333 | 0.034788889 | 1.02440691  |
| 0.0141       | 0.004333333  | 0.034744444 | 1.024375352 |
| -0.195       | 0.039733333  | 0.034677778 | 1.024328016 |
| 0.1051       | -0.039733333 | 0.034677778 | 1.024328016 |
| -0.084466667 | 0.011266667  | 0.034677778 | 1.024328016 |
| -0.023866667 | 0.064133333  | 0.0345      | 1.0242018   |
| 0.094966667  | 0.0643       | 0.0345      | 1.0242018   |
| -0.033333333 | 0.006533333  | 0.034455556 | 1.024170249 |
| -0.111166667 | -0.037966667 | 0.034444444 | 1.024162361 |
| 0.0408       | -0.138666667 | 0.034444444 | 1.024162361 |
| -0.0382      | -0.143133333 | 0.034433333 | 1.024154473 |
| 0.0244       | 0.161533333  | 0.034277778 | 1.024044052 |
| 0.016266667  | -0.166466667 | 0.034266667 | 1.024036165 |
| 0.003233333  | -0.0831      | 0.034188889 | 1.023980959 |
| -0.113933333 | -0.144166667 | 0.034055556 | 1.023886328 |
| 0.388766667  | 0.016333333  | 0.033877778 | 1.023760166 |
| 0.025733333  | -0.0272      | 0.033677778 | 1.023618252 |
| 0.022133333  | 0.030833333  | 0.033666667 | 1.023610369 |
| -0.039866667 | 0.120633333  | 0.033666667 | 1.023610369 |
| 0.215466667  | -0.0012      | 0.033611111 | 1.023570952 |

|              |              |             |             |
|--------------|--------------|-------------|-------------|
| 0.0328       | -0.0151      | 0.0336      | 1.023563069 |
| 0.0771       | -0.199466667 | 0.033577778 | 1.023547303 |
| 0.082166667  | 0.085033333  | 0.033566667 | 1.02353942  |
| -0.071033333 | -0.1257      | 0.033555556 | 1.023531537 |
| -0.0837      | -0.013033333 | 0.033555556 | 1.023531537 |
| -0.076766667 | -0.0051      | 0.033277778 | 1.023334484 |
| 0.287533333  | -0.148733333 | 0.033244444 | 1.023310841 |
| 0.0792       | 0.077566667  | 0.033233333 | 1.02330296  |
| -0.042366667 | 0.029        | 0.033233333 | 1.02330296  |
| -0.1058      | -0.094333333 | 0.0332      | 1.023279317 |
| 0.267033333  | 0.026366667  | 0.033177778 | 1.023263555 |
| -0.143333333 | -0.151933333 | 0.0331      | 1.023208391 |
| -0.018       | -0.064366667 | 0.033088889 | 1.02320051  |
| 0.0471       | 0.148        | 0.033077778 | 1.02319263  |
| 0.036066667  | 0.149833333  | 0.032866667 | 1.023042916 |
| 0.0557       | 0.0357       | 0.032633333 | 1.022877468 |
| 0.291333333  | -0.0734      | 0.032611111 | 1.022861713 |
| 0.0011       | 0.0931       | 0.032411111 | 1.022719924 |
| -0.194733333 | -0.007633333 | 0.0324      | 1.022712047 |
| 0.0607       | 0.060233333  | 0.032377778 | 1.022696294 |
| 0.2329       | -0.120966667 | 0.032366667 | 1.022688418 |
| -0.0426      | -0.0356      | 0.0323      | 1.022641161 |
| 0.111733333  | -0.027666667 | 0.0323      | 1.022641161 |
| 0.0724       | -0.013933333 | 0.032277778 | 1.022625409 |
| -0.0354      | -0.0528      | 0.032244444 | 1.022601781 |
| 0.016166667  | 0.3164       | 0.032077778 | 1.022483653 |
| -0.021433333 | -0.0342      | 0.032077778 | 1.022483653 |
| 0.1386       | 0.045433333  | 0.031988889 | 1.022420656 |
| -0.128133333 | -0.019466667 | 0.031677778 | 1.022200199 |
| -0.113033333 | -0.180733333 | 0.031611111 | 1.022152965 |
| 0.014033333  | -0.0916      | 0.031566667 | 1.022121476 |
| 0.027666667  | 0.041133333  | 0.031533333 | 1.02209786  |
| -0.061833333 | -0.096533333 | 0.031511111 | 1.022082117 |
| -0.048733333 | -0.126266667 | 0.0315      | 1.022074245 |
| 0.169133333  | -0.0003      | 0.031466667 | 1.022050631 |
| 0.045866667  | 0.170766667  | 0.031466667 | 1.022050631 |
| 0.2144       | 0.1415       | 0.031366667 | 1.02197979  |
| -0.068833333 | -0.135433333 | 0.031355556 | 1.021971919 |
| 0.244        | 0.333666667  | 0.031266667 | 1.021908954 |
| 0.0843       | 0.189266667  | 0.031233333 | 1.021885343 |
| -0.0094      | 0.058966667  | 0.031155556 | 1.021830253 |
| 0.054833333  | -0.0245      | 0.031144444 | 1.021822384 |
| 0.084566667  | -0.0482      | 0.0311      | 1.021790905 |
| 0.033833333  | -0.0195      | 0.030977778 | 1.021704345 |
| -0.0531      | -0.181633333 | 0.030922222 | 1.021665002 |
| -0.059533333 | -0.100866667 | 0.030888889 | 1.021641397 |
| 0.016066667  | -0.0129      | 0.030833333 | 1.021602056 |

|              |              |             |             |
|--------------|--------------|-------------|-------------|
| 0.016433333  | -0.094666667 | 0.030811111 | 1.02158632  |
| 0.0844       | 0.1504       | 0.0308      | 1.021578452 |
| 0.0485       | 0.0602       | 0.030777778 | 1.021562717 |
| -0.016066667 | -0.082666667 | 0.0307      | 1.021507644 |
| -0.036633333 | 0.049733333  | 0.0307      | 1.021507644 |
| -0.150566667 | -0.035966667 | 0.030566667 | 1.021413241 |
| 0.028233333  | 0.0307       | 0.030544444 | 1.021397508 |
| 0.058033333  | 0.081033333  | 0.0305      | 1.021366043 |
| -0.051266667 | -0.038       | 0.030466667 | 1.021342445 |
| 0.0605       | 0.0461       | 0.030455556 | 1.021334579 |
| -0.065133333 | 0.0403       | 0.030444444 | 1.021326713 |
| 0.152        | 0.138433333  | 0.030366667 | 1.021271653 |
| -0.0343      | -0.1023      | 0.030177778 | 1.021137949 |
| 0.174366667  | 0.126966667  | 0.030166667 | 1.021130084 |
| -0.0122      | 0.109866667  | 0.030122222 | 1.021098627 |
| -0.012033333 | 0.1411       | 0.030055556 | 1.021051444 |
| 0.0594       | 0.014666667  | 0.030044444 | 1.02104358  |
| 0.0143       | 0.013566667  | 0.030033333 | 1.021035716 |
| 0.014966667  | -0.017666667 | 0.029988889 | 1.021004262 |
| -0.094866667 | 0.025566667  | 0.029933333 | 1.020964946 |
| -0.137933333 | -0.125933333 | 0.029911111 | 1.02094922  |
| -0.1221      | 0.133433333  | 0.029866667 | 1.020917769 |
| -0.040833333 | 0.028633333  | 0.0298      | 1.020870593 |
| 0.015933333  | 0.084933333  | 0.029788889 | 1.020862731 |
| -0.1591      | -0.112833333 | 0.029722222 | 1.020815558 |
| -0.011566667 | 0.056733333  | 0.029611111 | 1.020736942 |
| 0.154        | -0.0873      | 0.029477778 | 1.02064261  |
| 0.126333333  | 0.1624       | 0.029377778 | 1.020571867 |
| 0.013066667  | 0.039766667  | 0.029344444 | 1.020548287 |
| -0.060366667 | -0.0587      | 0.029344444 | 1.020548287 |
| -0.094733333 | -0.172533333 | 0.0293      | 1.020516848 |
| -0.037       | 0.088333333  | 0.029255556 | 1.02048541  |
| -0.056866667 | -0.223066667 | 0.029066667 | 1.020351808 |
| 0.0447       | 0.0263       | 0.029066667 | 1.020351808 |
| -0.094766667 | -0.029933333 | 0.029033333 | 1.020328234 |
| 0.090933333  | 0.0072       | 0.028955556 | 1.020273228 |
| -0.042233333 | 0.040466667  | 0.028933333 | 1.020257512 |
| -0.003133333 | -0.074333333 | 0.028922222 | 1.020249655 |
| 0.024533333  | -0.141966667 | 0.028866667 | 1.020210367 |
| -0.002966667 | 0.028533333  | 0.028811111 | 1.020171082 |
| 0.051533333  | -0.136366667 | 0.028811111 | 1.020171082 |
| 0.0517       | 0.099266667  | 0.028755556 | 1.020131798 |
| -0.030266667 | -0.048033333 | 0.028566667 | 1.019998243 |
| 0.106466667  | -0.1345      | 0.028566667 | 1.019998243 |
| 0.0066       | 0.028533333  | 0.028544444 | 1.019982532 |
| 0.251366667  | 0.133766667  | 0.028511111 | 1.019958965 |
| 0.1027       | -0.057866667 | 0.028433333 | 1.019903979 |

|              |              |             |             |
|--------------|--------------|-------------|-------------|
| -0.0174      | 0.009466667  | 0.0284      | 1.019880415 |
| 0.129966667  | 0.150933333  | 0.0284      | 1.019880415 |
| -0.184166667 | -0.271633333 | 0.028355556 | 1.019848996 |
| 0.1422       | -0.172033333 | 0.028344444 | 1.019841142 |
| -0.255666667 | -0.178666667 | 0.028311111 | 1.019817579 |
| -0.131266667 | 0.079633333  | 0.028311111 | 1.019817579 |
| 0.051233333  | -0.017366667 | 0.028288889 | 1.01980187  |
| 0.595666667  | 0.010933333  | 0.0282      | 1.019739039 |
| 0.0201       | 0.1549       | 0.028055556 | 1.019636947 |
| 0.0689       | -0.0954      | 0.028055556 | 1.019636947 |
| 0.046666667  | 0.068333333  | 0.028044444 | 1.019629094 |
| -0.0155      | 0.014333333  | 0.028033333 | 1.019621241 |
| -0.238133333 | -0.017133333 | 0.0277      | 1.019385686 |
| 0.120433333  | 0.0473       | 0.0276      | 1.01931503  |
| 0.130133333  | -0.015966667 | 0.0276      | 1.01931503  |
| -0.0192      | 0.0018       | 0.027522222 | 1.019260078 |
| -0.033866667 | 0.108566667  | 0.027477778 | 1.019228679 |
| 0.047833333  | 0.0054       | 0.027377778 | 1.019158034 |
| -0.0444      | -0.0603      | 0.027277778 | 1.019087394 |
| 0.034433333  | 0.0862       | 0.027244444 | 1.019063848 |
| -0.0672      | -0.034366667 | 0.0272      | 1.019032455 |
| -0.013133333 | 0.005966667  | 0.0272      | 1.019032455 |
| -0.016833333 | 0.001033333  | 0.027177778 | 1.019016758 |
| 0.188533333  | 0.360266667  | 0.027122222 | 1.018977519 |
| 0.1899       | 0.092233333  | 0.027111111 | 1.018969671 |
| 0.032866667  | -0.083466667 | 0.027077778 | 1.018946128 |
| 0.019633333  | 0.108266667  | 0.027011111 | 1.018899044 |
| 0.0269       | 0.061533333  | 0.0269      | 1.018820575 |
| 0.080466667  | 0.203633333  | 0.0269      | 1.018820575 |
| 0.058033333  | -0.1335      | 0.026877778 | 1.018804882 |
| 0.030533333  | 0.1086       | 0.026822222 | 1.01876565  |
| -0.054133333 | 0.0267       | 0.0267      | 1.018679346 |
| 0.181933333  | 0.251833333  | 0.026666667 | 1.01865581  |
| 0.121766667  | -0.081266667 | 0.026544444 | 1.018569515 |
| -0.008166667 | 0.0592       | 0.026477778 | 1.018522448 |
| -0.048733333 | -0.103       | 0.026422222 | 1.018483228 |
| 0.0146       | 0.011933333  | 0.026388889 | 1.018459696 |
| -0.088233333 | -0.133666667 | 0.026366667 | 1.018444008 |
| 0.037266667  | 0.1741       | 0.026277778 | 1.018381261 |
| 0.048166667  | 0.087533333  | 0.0262      | 1.01832636  |
| -0.1046      | -0.052833333 | 0.026155556 | 1.018294989 |
| -0.1077      | 0.036433333  | 0.026066667 | 1.018232251 |
| 0.096866667  | 0.0047       | 0.026022222 | 1.018200883 |
| 0.001233333  | -0.027333333 | 0.025933333 | 1.018138151 |
| -0.0305      | 0.080833333  | 0.025877778 | 1.018098945 |
| -0.033933333 | 0.0034       | 0.025822222 | 1.01805974  |
| 0.088733333  | 0.1199       | 0.025655556 | 1.017942136 |

|              |              |             |             |
|--------------|--------------|-------------|-------------|
| 0.1402       | 0.311033333  | 0.025644444 | 1.017934297 |
| 0.1184       | 0.0908       | 0.025511111 | 1.017840224 |
| -0.1685      | -0.263166667 | 0.025477778 | 1.017816707 |
| 0.299733333  | 0.147966667  | 0.025455556 | 1.017801029 |
| -0.008       | -0.1015      | 0.025411111 | 1.017769675 |
| -0.0583      | 0.106466667  | 0.025333333 | 1.017714807 |
| 0.096266667  | -0.026733333 | 0.0251      | 1.017550221 |
| 0.274966667  | 0.007966667  | 0.0251      | 1.017550221 |
| -0.1129      | -0.1798      | 0.025088889 | 1.017542384 |
| -0.065       | 0.0129       | 0.025       | 1.017479692 |
| -0.132733333 | -0.007833333 | 0.024988889 | 1.017471856 |
| -0.0831      | -0.091933333 | 0.024955556 | 1.017448348 |
| 0.0749       | -0.073866667 | 0.024911111 | 1.017417004 |
| 0.026533333  | -0.0244      | 0.024888889 | 1.017401333 |
| -0.021233333 | 0.150466667  | 0.024877778 | 1.017393497 |
| 0.045766667  | 0.2101       | 0.024855556 | 1.017377826 |
| 0.391366667  | 0.068133333  | 0.024833333 | 1.017362155 |
| -0.093433333 | -0.036566667 | 0.024655556 | 1.017236797 |
| -0.048666667 | -0.084733333 | 0.024622222 | 1.017213294 |
| -0.2242      | -0.191733333 | 0.024566667 | 1.017174124 |
| 0.0694       | 0.039966667  | 0.024566667 | 1.017174124 |
| 0.083766667  | 0.039433333  | 0.024388889 | 1.017048789 |
| 0.000266667  | 0.057333333  | 0.024366667 | 1.017033123 |
| 0.239033333  | 0.019        | 0.024355556 | 1.017025291 |
| 0.0133       | 0.031666667  | 0.024244444 | 1.016946966 |
| -0.097966667 | 0.197766667  | 0.024155556 | 1.016884311 |
| 0.103933333  | 0.015333333  | 0.024111111 | 1.016852985 |
| 0.323033333  | -0.015233333 | 0.0241      | 1.016845153 |
| -0.057433333 | -0.037233333 | 0.023988889 | 1.016766842 |
| -0.010333333 | -0.083366667 | 0.023966667 | 1.016751181 |
| -0.040433333 | 0.030833333  | 0.023888889 | 1.016696368 |
| -0.019066667 | -0.010733333 | 0.023877778 | 1.016688538 |
| -0.1001      | 0.145266667  | 0.023755556 | 1.01660241  |
| 0.015533333  | 0.022133333  | 0.023666667 | 1.016539776 |
| 0.075266667  | -0.398       | 0.0236      | 1.016492803 |
| -0.154233333 | 0.056133333  | 0.023577778 | 1.016477145 |
| 0.086066667  | 0.0777       | 0.0235      | 1.016422347 |
| 0.0174       | 0.105533333  | 0.0235      | 1.016422347 |
| 0.1567       | 0.0158       | 0.023422222 | 1.016367552 |
| 0.100666667  | 0.0233       | 0.023411111 | 1.016359724 |
| -0.0158      | 0.114066667  | 0.0234      | 1.016351897 |
| 0.06         | -0.039533333 | 0.023388889 | 1.016344069 |
| -0.050833333 | 0.0917       | 0.023377778 | 1.016336241 |
| -0.005266667 | 0.031633333  | 0.023344444 | 1.016312759 |
| 0.0835       | 0.099733333  | 0.0233      | 1.016281451 |
| 0.0584       | -0.065266667 | 0.0233      | 1.016281451 |
| 0.0568       | 0.060466667  | 0.023166667 | 1.016187531 |

|              |              |             |             |
|--------------|--------------|-------------|-------------|
| 0.0564       | -0.006866667 | 0.023133333 | 1.016164052 |
| -0.046666667 | -0.004533333 | 0.023055556 | 1.016109271 |
| -0.0323      | 0.0431       | 0.022944444 | 1.016031017 |
| -0.088333333 | 0.0023       | 0.022911111 | 1.016007542 |
| 0.135033333  | 0.033666667  | 0.022644444 | 1.015819761 |
| 0.0421       | -0.019733333 | 0.022533333 | 1.015741529 |
| -0.048366667 | -0.070766667 | 0.022511111 | 1.015725884 |
| 0.148933333  | -0.096733333 | 0.022511111 | 1.015725884 |
| -0.004866667 | -0.147033333 | 0.022466667 | 1.015694593 |
| -0.052533333 | -0.105633333 | 0.022355556 | 1.015616371 |
| 0.003166667  | -0.0416      | 0.022288889 | 1.015569441 |
| -0.112366667 | -0.039666667 | 0.022222222 | 1.015522513 |
| 0.0616       | 0.0401       | 0.022166667 | 1.015483407 |
| -0.216833333 | 0.071566667  | 0.022055556 | 1.015405202 |
| -0.231766667 | -0.1048      | 0.021988889 | 1.015358281 |
| -0.012933333 | 0.026933333  | 0.021855556 | 1.015264446 |
| -0.039166667 | 0.1874       | 0.0218      | 1.015225351 |
| 0.111766667  | -0.042733333 | 0.021777778 | 1.015209713 |
| 0.037166667  | -0.200133333 | 0.021711111 | 1.015162802 |
| -0.057133333 | -0.1831      | 0.021677778 | 1.015139347 |
| 0.0445       | -0.015966667 | 0.021677778 | 1.015139347 |
| 0.091866667  | 0.077633333  | 0.021633333 | 1.015108074 |
| 0.014466667  | 0.127433333  | 0.021566667 | 1.015061167 |
| 0.102533333  | 0.054633333  | 0.021522222 | 1.015029897 |
| -0.1314      | 0.087366667  | 0.021466667 | 1.014990811 |
| -0.0146      | -0.172766667 | 0.021411111 | 1.014951727 |
| 0.011766667  | 0.0281       | 0.021388889 | 1.014936093 |
| -0.0038      | 0.078833333  | 0.021255556 | 1.014842297 |
| -0.165033333 | 0.016866667  | 0.021211111 | 1.014811034 |
| 0.053233333  | 0.0566       | 0.0212      | 1.014803218 |
| 0.035533333  | 0.042066667  | 0.021122222 | 1.01474851  |
| -0.112066667 | -0.064166667 | 0.0211      | 1.01473288  |
| 0.0731       | -0.173633333 | 0.021066667 | 1.014709435 |
| 0.096533333  | 0.017066667  | 0.021044444 | 1.014693805 |
| 0.066166667  | 0.1834       | 0.020988889 | 1.014654732 |
| 0.027666667  | 0.045133333  | 0.020944444 | 1.014623475 |
| -0.186433333 | -0.015566667 | 0.020833333 | 1.014545335 |
| 0.016066667  | 0.046266667  | 0.020677778 | 1.01443595  |
| 0.035366667  | 0.1357       | 0.020611111 | 1.014389074 |
| 0.0742       | 0.165333333  | 0.0206      | 1.014381261 |
| -0.0035      | 0.0216       | 0.020577778 | 1.014365637 |
| -0.030766667 | -0.061866667 | 0.020544444 | 1.0143422   |
| 0.052633333  | 0.1145       | 0.020533333 | 1.014334388 |
| -0.158366667 | 0.077466667  | 0.020533333 | 1.014334388 |
| 0.089933333  | 0.126133333  | 0.020533333 | 1.014334388 |
| -0.041933333 | -0.066466667 | 0.0202      | 1.014100054 |
| 0.532866667  | -0.068166667 | 0.020144444 | 1.014061004 |



|              |              |             |             |
|--------------|--------------|-------------|-------------|
| 0.101566667  | -0.0146      | 0.020055556 | 1.013998526 |
| -0.048466667 | 0.0095       | 0.020044444 | 1.013990717 |
| -0.030933333 | 0.086266667  | 0.019977778 | 1.013943862 |
| -0.0066      | 0.026066667  | 0.0199      | 1.0138892   |
| -0.090866667 | 0.053333333  | 0.0199      | 1.0138892   |
| 0.21         | 0.1315       | 0.019833333 | 1.013842349 |
| -0.1683      | -0.023133333 | 0.0198      | 1.013818925 |
| 0.056166667  | -0.007933333 | 0.019777778 | 1.013803309 |
| 0.044866667  | 0.028533333  | 0.019744444 | 1.013779885 |
| -0.215033333 | 0.028066667  | 0.019666667 | 1.013725232 |
| -0.045466667 | 0.129        | 0.019655556 | 1.013717425 |
| 0.1397       | -0.332466667 | 0.019633333 | 1.013701811 |
| 0.1545       | 0.048966667  | 0.019555556 | 1.013647162 |
| -0.125366667 | -0.015       | 0.019511111 | 1.013615936 |
| 0.001833333  | 0.052133333  | 0.019422222 | 1.013553485 |
| 0.066366667  | -0.071266667 | 0.019411111 | 1.01354568  |
| 0.015533333  | 0.006966667  | 0.019388889 | 1.013530068 |
| 0.0208       | 0.0771       | 0.0193      | 1.013467623 |
| 0.130566667  | 0.065833333  | 0.019233333 | 1.013420792 |
| 0.0003       | 0.112        | 0.019122222 | 1.013342745 |
| -0.082866667 | 0.002666667  | 0.018988889 | 1.013249096 |
| -0.027933333 | -0.081433333 | 0.018977778 | 1.013241293 |
| -0.084433333 | -0.030966667 | 0.018966667 | 1.013233489 |
| -0.0082      | -0.0281      | 0.018855556 | 1.013155457 |
| -0.0912      | 0.240633333  | 0.018788889 | 1.01310864  |
| 0.048233333  | 0.0347       | 0.018688889 | 1.013038419 |
| -0.115633333 | -0.1932      | 0.018666667 | 1.013022815 |
| 0.097333333  | 0.194633333  | 0.018477778 | 1.012890191 |
| 0.1499       | 0.183366667  | 0.018455556 | 1.012874589 |
| -0.166766667 | -0.015466667 | 0.018433333 | 1.012858988 |
| -0.183366667 | -0.2064      | 0.018411111 | 1.012843387 |
| -0.013866667 | 0.046733333  | 0.0184      | 1.012835586 |
| 0.024766667  | -0.003133333 | 0.0184      | 1.012835586 |
| -0.920933333 | -1.008266667 | 0.018266667 | 1.012741985 |
| 0.079666667  | 0.010733333  | 0.018222222 | 1.012710786 |
| -0.072033333 | 0.0031       | 0.018144444 | 1.012656191 |
| 0.1162       | 0.2677       | 0.018144444 | 1.012656191 |
| 0.102966667  | 0.103966667  | 0.018122222 | 1.012640593 |
| 0.0273       | -0.198866667 | 0.018066667 | 1.012601598 |
| -0.006433333 | -0.121866667 | 0.018044444 | 1.012586001 |
| -0.141166667 | 0.053966667  | 0.018033333 | 1.012578203 |
| -0.104133333 | -0.0136      | 0.017988889 | 1.012547009 |
| -0.086466667 | -0.1415      | 0.017966667 | 1.012531413 |
| 0.004766667  | -0.0432      | 0.0179      | 1.012484625 |
| -0.0033      | 0.141866667  | 0.0178      | 1.012414447 |
| 0.046866667  | 0.111566667  | 0.017633333 | 1.012297495 |
| -0.4187      | -0.258133333 | 0.017588889 | 1.01226631  |

|              |              |             |             |
|--------------|--------------|-------------|-------------|
| 0.0432       | 0.0338       | 0.017588889 | 1.01226631  |
| -0.0225      | -0.0609      | 0.017577778 | 1.012258514 |
| 0.0949       | -0.045666667 | 0.017566667 | 1.012250718 |
| 0.072133333  | 0.0181       | 0.017355556 | 1.012102605 |
| 0.155833333  | -0.015933333 | 0.017044444 | 1.011884373 |
| -0.075033333 | -0.022566667 | 0.016933333 | 1.011806445 |
| 0.1269       | -0.035766667 | 0.016888889 | 1.011775275 |
| 0.000366667  | 0.0037       | 0.016788889 | 1.011705146 |
| -0.013333333 | -0.025533333 | 0.016711111 | 1.011650605 |
| -0.0236      | 0.019566667  | 0.016666667 | 1.01161944  |
| 0.0033       | -0.1363      | 0.016566667 | 1.011549323 |
| 0.088        | 0.154533333  | 0.016533333 | 1.011525951 |
| -0.088633333 | 0.026266667  | 0.016433333 | 1.01145584  |
| 0.074933333  | 0.135566667  | 0.016411111 | 1.01144026  |
| 0.003433333  | 0.1928       | 0.016411111 | 1.01144026  |
| -0.035633333 | 0.104266667  | 0.016388889 | 1.011424681 |
| 0.060233333  | 0.047266667  | 0.016388889 | 1.011424681 |
| -0.070466667 | -0.245666667 | 0.016355556 | 1.011401312 |
| 0.048166667  | -0.093633333 | 0.016344444 | 1.011393523 |
| -0.206166667 | -0.285166667 | 0.016322222 | 1.011377944 |
| 0.015133333  | -0.017733333 | 0.016277778 | 1.011346788 |
| 0.0826       | -0.081366667 | 0.016266667 | 1.011338999 |
| 0.269466667  | 0.006333333  | 0.016255556 | 1.01133121  |
| -0.060933333 | 0.016233333  | 0.016244444 | 1.011323421 |
| 0.107633333  | 0.0101       | 0.016211111 | 1.011300055 |
| -0.095266667 | -0.077833333 | 0.016177778 | 1.011276689 |
| 0.021966667  | -0.036533333 | 0.016155556 | 1.011261112 |
| -0.055233333 | 0.114833333  | 0.016033333 | 1.011175444 |
| 0.0199       | 0.029133333  | 0.015988889 | 1.011144293 |
| 0.010333333  | 0.052066667  | 0.015977778 | 1.011136506 |
| -0.0541      | -0.078366667 | 0.015944444 | 1.011113144 |
| -0.0405      | 0.162733333  | 0.015944444 | 1.011113144 |
| 0.337466667  | 0.0304       | 0.015755556 | 1.01098077  |
| 0.016366667  | -0.193633333 | 0.015633333 | 1.010895125 |
| 0.166066667  | 0.047566667  | 0.015577778 | 1.010856198 |
| -0.076966667 | -0.1095      | 0.015566667 | 1.010848413 |
| 0.089        | 0.044733333  | 0.015555556 | 1.010840628 |
| 0.088833333  | 0.0553       | 0.015533333 | 1.010825058 |
| 0.188533333  | -0.006333333 | 0.015533333 | 1.010825058 |
| -0.0699      | -0.027466667 | 0.015388889 | 1.010723858 |
| 0.0719       | 0.061266667  | 0.015344444 | 1.010692721 |
| -0.070933333 | -0.259666667 | 0.015333333 | 1.010684937 |
| -0.0323      | -0.045666667 | 0.015211111 | 1.010599318 |
| -0.024466667 | 0.070633333  | 0.015211111 | 1.010599318 |
| 0.149966667  | 0.009033333  | 0.015       | 1.010451446 |
| 0.123466667  | -0.050433333 | 0.014933333 | 1.010404755 |
| 0.108466667  | 0.1143       | 0.0148      | 1.010311378 |

|              |              |             |             |
|--------------|--------------|-------------|-------------|
| -0.028233333 | 0.057666667  | 0.014788889 | 1.010303597 |
| 0.042466667  | 0.0094       | 0.014733333 | 1.010264693 |
| 0.062766667  | 0.214433333  | 0.014688889 | 1.01023357  |
| -0.040833333 | 0.031166667  | 0.014677778 | 1.01022579  |
| -0.114766667 | -0.024333333 | 0.014677778 | 1.01022579  |
| 0.124833333  | 0.143333333  | 0.014577778 | 1.010155769 |
| -0.038133333 | -0.061766667 | 0.014566667 | 1.010147989 |
| -0.064466667 | -0.0728      | 0.014511111 | 1.010109091 |
| 0.0884       | 0.2376       | 0.014477778 | 1.010085753 |
| -0.080866667 | -0.174433333 | 0.014333333 | 1.009984627 |
| -0.135633333 | -0.082033333 | 0.014288889 | 1.009953513 |
| 0.021033333  | 0.026066667  | 0.014288889 | 1.009953513 |
| -0.121333333 | -0.0429      | 0.014       | 1.009751298 |
| -0.048633333 | -0.165333333 | 0.013933333 | 1.009704638 |
| 0.059166667  | -0.159166667 | 0.013877778 | 1.009665757 |
| 0.023666667  | 0.061366667  | 0.013733333 | 1.009564673 |
| -0.051       | 0.187566667  | 0.013688889 | 1.009533572 |
| -0.083633333 | -0.0907      | 0.013666667 | 1.009518022 |
| -0.032833333 | 0.051566667  | 0.013622222 | 1.009486923 |
| -0.097466667 | -0.209033333 | 0.013522222 | 1.009416953 |
| 0.0066       | 0.2158       | 0.013444444 | 1.009362536 |
| 0.010833333  | 0.060033333  | 0.013444444 | 1.009362536 |
| 0.0335       | 0.054        | 0.013411111 | 1.009339215 |
| -0.114       | 0.045        | 0.013255556 | 1.009230391 |
| 0.0728       | 0.078733333  | 0.013177778 | 1.009175983 |
| -0.045066667 | 0.0392       | 0.013177778 | 1.009175983 |
| -0.060333333 | -0.024666667 | 0.013088889 | 1.009113807 |
| 0.137533333  | 0.060266667  | 0.013044444 | 1.00908272  |
| -0.031766667 | -0.1071      | 0.012888889 | 1.008973923 |
| -0.258566667 | -0.073733333 | 0.012722222 | 1.008857369 |
| 0.3833       | 0.066966667  | 0.012666667 | 1.00881852  |
| 0.026533333  | 0.061033333  | 0.012555556 | 1.008740828 |
| -0.260766667 | -0.188833333 | 0.012488889 | 1.008694215 |
| -4.00E-04    | 0.0618       | 0.012466667 | 1.008678678 |
| 0.319333333  | 0.223466667  | 0.012422222 | 1.008647605 |
| 0.286266667  | 0.139966667  | 0.012377778 | 1.008616532 |
| -0.028566667 | -0.0576      | 0.012333333 | 1.008585461 |
| 0.065566667  | 0.0978       | 0.012233333 | 1.008515553 |
| 0.063833333  | -0.0606      | 0.012222222 | 1.008507786 |
| -0.0409      | -0.097633333 | 0.012177778 | 1.008476718 |
| 0.1987       | -0.020766667 | 0.012177778 | 1.008476718 |
| -0.026433333 | -0.079633333 | 0.0121      | 1.008422351 |
| 0.056366667  | 0.0462       | 0.012055556 | 1.008391285 |
| -0.070933333 | 0.054433333  | 0.012044444 | 1.008383519 |
| 0.069666667  | -0.4557      | 0.011966667 | 1.008329157 |
| -0.137133333 | 0.031866667  | 0.011844444 | 1.008243737 |
| 0.0353       | -0.0453      | 0.011844444 | 1.008243737 |

|              |              |             |             |
|--------------|--------------|-------------|-------------|
| -0.1551      | -0.0518      | 0.011788889 | 1.008204912 |
| -0.157066667 | -0.058166667 | 0.011744444 | 1.008173854 |
| -0.109       | -0.302166667 | 0.011722222 | 1.008158325 |
| -0.031666667 | 0.192633333  | 0.011688889 | 1.008135031 |
| -0.0413      | -0.017933333 | 0.011644444 | 1.008103975 |
| 0.103        | -0.4242      | 0.011644444 | 1.008103975 |
| -0.049366667 | -0.073733333 | 0.011522222 | 1.008018574 |
| -0.0036      | -0.0605      | 0.011433333 | 1.007956469 |
| 0.105066667  | -4.63E-18    | 0.011366667 | 1.007909892 |
| 0.110833333  | -0.464333333 | 0.011322222 | 1.007878842 |
| -0.03        | -0.182266667 | 0.011322222 | 1.007878842 |
| -0.103966667 | -0.0706      | 0.011266667 | 1.007840032 |
| -0.181533333 | -0.132633333 | 0.011233333 | 1.007816746 |
| 0.031566667  | 0.1767       | 0.011166667 | 1.007770176 |
| 0.099266667  | -0.074066667 | 0.011055556 | 1.007692564 |
| -0.051466667 | -0.110866667 | 0.011044444 | 1.007684803 |
| 0.013333333  | 0.012966667  | 0.010866667 | 1.007560638 |
| 0.034266667  | -0.051333333 | 0.0108      | 1.00751408  |
| -0.061966667 | -0.1621      | 0.0108      | 1.00751408  |
| -0.002833333 | -0.007533333 | 0.010744444 | 1.007475283 |
| 0.018933333  | -0.0257      | 0.010722222 | 1.007459765 |
| -0.287033333 | -0.188166667 | 0.010611111 | 1.007382177 |
| -0.238966667 | -0.2828      | 0.010555556 | 1.007343385 |
| -0.047433333 | -0.0338      | 0.010422222 | 1.007250291 |
| 0.074933333  | 0.162033333  | 0.0104      | 1.007234776 |
| -0.129466667 | -0.063766667 | 0.010366667 | 1.007211504 |
| 0.003466667  | -0.0002      | 0.010311111 | 1.007172719 |
| 0.050733333  | -0.0635      | 0.010255556 | 1.007133936 |
| 0.054666667  | -0.0326      | 0.010166667 | 1.007071885 |
| 0.1559       | -0.134       | 0.010133333 | 1.007048617 |
| 0.111366667  | -0.128866667 | 0.010111111 | 1.007033105 |
| 0.074933333  | 0.165366667  | 0.010011111 | 1.006963305 |
| -0.0098      | 0.1119       | 0.009788889 | 1.006808212 |
| 0.058566667  | 0.025333333  | 0.009666667 | 1.006722921 |
| -0.0709      | -0.037866667 | 0.009644444 | 1.006707414 |
| -0.091466667 | -0.091666667 | 0.009588889 | 1.006668648 |
| -0.053666667 | 0.1213       | 0.0095      | 1.006606626 |
| 0.036566667  | -0.008333333 | 0.009455556 | 1.006575617 |
| 0.033866667  | -0.024966667 | 0.009344444 | 1.006498097 |
| -0.013433333 | 0.149033333  | 0.009333333 | 1.006490345 |
| -0.149566667 | -0.1077      | 0.009233333 | 1.006420583 |
| 0.005933333  | -0.001133333 | 0.0092      | 1.00639733  |
| 0.029966667  | -0.005533333 | 0.009144444 | 1.006358576 |
| 0.2252       | 0.222066667  | 0.009111111 | 1.006335325 |
| 0.2926       | 0.056466667  | 0.008922222 | 1.006203576 |
| 0.133        | -0.008766667 | 0.008911111 | 1.006195827 |
| -0.0439      | 0.1975       | 0.0089      | 1.006188077 |

|              |              |             |             |
|--------------|--------------|-------------|-------------|
| -0.1238      | 0.044433333  | 0.008877778 | 1.006172579 |
| 0.0494       | -0.000433333 | 0.008866667 | 1.00616483  |
| 0.0148       | -0.1086      | 0.008844444 | 1.006149332 |
| 0.017066667  | 0.060133333  | 0.0088      | 1.006118336 |
| 0.1622       | 0.1838       | 0.0087      | 1.0060486   |
| -0.138133333 | -0.018966667 | 0.008688889 | 1.006040852 |
| 0.043333333  | -0.0107      | 0.008677778 | 1.006033104 |
| -0.099866667 | -0.334233333 | 0.008566667 | 1.005955625 |
| -0.0133      | 0.018833333  | 0.008566667 | 1.005955625 |
| 0.019333333  | 0.0754       | 0.008533333 | 1.005932383 |
| 0.145533333  | 0.141666667  | 0.008488889 | 1.005901394 |
| -0.010933333 | 0.043533333  | 0.008422222 | 1.005854913 |
| -0.008066667 | -0.046666667 | 0.0084      | 1.00583942  |
| -0.1575      | -0.358566667 | 0.008344444 | 1.005800687 |
| -0.007766667 | 0.0077       | 0.008333333 | 1.005792941 |
| -0.153133333 | -0.0159      | 0.008322222 | 1.005785195 |
| 0.0271       | 0.127966667  | 0.008266667 | 1.005746465 |
| -0.0471      | 0.137466667  | 0.008266667 | 1.005746465 |
| -0.013433333 | -0.007133333 | 0.008155556 | 1.005669009 |
| 0.018033333  | -0.1072      | 0.008077778 | 1.005614793 |
| 0.298066667  | 0.205366667  | 0.008033333 | 1.005583814 |
| 0.149533333  | -0.000166667 | 0.008033333 | 1.005583814 |
| 0.4428       | -0.0398      | 0.007988889 | 1.005552836 |
| 0.033633333  | -0.010466667 | 0.007888889 | 1.005483139 |
| -0.101433333 | -0.043       | 0.007877778 | 1.005475395 |
| -0.0306      | 0.062333333  | 0.007866667 | 1.005467651 |
| 0.202866667  | 0.038966667  | 0.007822222 | 1.005436677 |
| 0.033833333  | 0.0209       | 0.007811111 | 1.005428933 |
| -0.017566667 | -0.070433333 | 0.007788889 | 1.005413446 |
| 0.168366667  | 0.2184       | 0.007755556 | 1.005390217 |
| 0.253866667  | 0.053133333  | 0.0077      | 1.005351502 |
| 0.083666667  | 0.008066667  | 0.007677778 | 1.005336016 |
| 0.0059       | -0.0552      | 0.007566667 | 1.005258592 |
| -0.4244      | -0.046433333 | 0.007422222 | 1.005157949 |
| -0.0243      | 0.126833333  | 0.007377778 | 1.005126984 |
| 5.00E-04     | 0.132566667  | 0.0073      | 1.005072798 |
| -0.013166667 | 0.295733333  | 0.007266667 | 1.005049576 |
| -0.074566667 | -0.058866667 | 0.007255556 | 1.005041835 |
| 0.016866667  | 0.1131       | 0.007244444 | 1.005034095 |
| 0.046966667  | -0.041266667 | 0.007222222 | 1.005018614 |
| 0.1146       | 0.058933333  | 0.007188889 | 1.004995394 |
| 0.045866667  | 0.0045       | 0.0071      | 1.004933475 |
| -0.0602      | -0.104466667 | 0.007033333 | 1.004887038 |
| -0.067133333 | 0.0687       | 0.007033333 | 1.004887038 |
| -0.0343      | 0.024533333  | 0.007033333 | 1.004887038 |
| -0.005966667 | 0.262033333  | 0.007011111 | 1.00487156  |
| -0.1434      | 0.024733333  | 0.006944444 | 1.004825126 |

|              |              |             |             |
|--------------|--------------|-------------|-------------|
| -0.113166667 | -0.123933333 | 0.006855556 | 1.004763217 |
| 0.112766667  | 0.0119       | 0.006766667 | 1.004701313 |
| -0.0467      | -0.1241      | 0.006766667 | 1.004701313 |
| 0.0181       | 0.0137       | 0.006722222 | 1.004670362 |
| -0.2085      | -0.163966667 | 0.006688889 | 1.004647149 |
| -0.017233333 | 0.0327       | 0.006655556 | 1.004623937 |
| -0.0141      | 0.002533333  | 0.006644444 | 1.0046162   |
| 0.006133333  | -0.155933333 | 0.0066      | 1.004585252 |
| 0.054566667  | -0.003333333 | 0.006544444 | 1.004546568 |
| 0.014966667  | 0.0299       | 0.006477778 | 1.004500149 |
| -0.172833333 | -0.275366667 | 0.006455556 | 1.004484676 |
| 0.129866667  | -0.335933333 | 0.006433333 | 1.004469204 |
| 0.0046       | 0.045066667  | 0.006388889 | 1.00443826  |
| -0.0124      | -0.056433333 | 0.0063      | 1.004376376 |
| 0.045366667  | -0.093566667 | 0.006288889 | 1.00436864  |
| 0.084333333  | 0.019766667  | 0.006266667 | 1.00435317  |
| 0.1757       | 0.0336       | 0.006244444 | 1.0043377   |
| -0.2285      | 0.058966667  | 0.006222222 | 1.00432223  |
| 0.021566667  | 0.0311       | 0.006222222 | 1.00432223  |
| -0.078333333 | -0.129633333 | 0.006211111 | 1.004314495 |
| -0.369166667 | -0.3319      | 0.006155556 | 1.004275821 |
| 0.0916       | 0.003866667  | 0.006133333 | 1.004260352 |
| 0.0435       | 0.162966667  | 0.006077778 | 1.004221681 |
| -0.033633333 | -0.0283      | 0.005966667 | 1.004144342 |
| 0.0294       | -0.040233333 | 0.005844444 | 1.004059277 |
| 0.011066667  | -0.059966667 | 0.005822222 | 1.004043811 |
| -0.102233333 | -0.122833333 | 0.005733333 | 1.003981951 |
| -0.065       | 0.097733333  | 0.005555556 | 1.003858242 |
| 0.205233333  | -0.0457      | 0.005455556 | 1.003788662 |
| -0.016933333 | -0.2001      | 0.005266667 | 1.003657247 |
| 0.097366667  | -0.210233333 | 0.005211111 | 1.003618598 |
| 0.074066667  | -0.0972      | 0.005166667 | 1.003587681 |
| -0.000733333 | -0.432766667 | 0.005144444 | 1.003572222 |
| 0.0061       | -0.019566667 | 0.005133333 | 1.003564493 |
| -0.109633333 | -0.194633333 | 0.0051      | 1.003541306 |
| -0.076766667 | 0.1987       | 0.0051      | 1.003541306 |
| 0.2048       | 0.185        | 0.005077778 | 1.003525849 |
| 0.1479       | -0.093233333 | 0.005033333 | 1.003494934 |
| 0.074533333  | -0.048933333 | 0.004977778 | 1.003456292 |
| -0.223433333 | 0.043833333  | 0.004877778 | 1.00338674  |
| 0.320166667  | 0.247233333  | 0.004755556 | 1.003301739 |
| -0.098233333 | -0.016866667 | 0.004744444 | 1.003294012 |
| -0.086733333 | 0.149566667  | 0.004733333 | 1.003286285 |
| -0.039966667 | -0.138       | 0.004722222 | 1.003278558 |
| -0.041533333 | 0.124033333  | 0.004577778 | 1.003178113 |
| 0.1509       | 0.144033333  | 0.004477778 | 1.003108581 |
| -0.119566667 | -0.1474      | 0.004388889 | 1.003046778 |

|              |              |             |             |
|--------------|--------------|-------------|-------------|
| 0.129933333  | 0.181        | 0.004388889 | 1.003046778 |
| 0.037666667  | 0.062133333  | 0.004355556 | 1.003023603 |
| 0.011866667  | -0.021333333 | 0.004333333 | 1.003008153 |
| -0.5292      | -0.470633333 | 0.004288889 | 1.002977254 |
| -0.039033333 | -0.0474      | 0.004166667 | 1.002892288 |
| -0.1153      | -0.012866667 | 0.004144444 | 1.00287684  |
| 0.079066667  | -0.009233333 | 0.004111111 | 1.002853669 |
| 0.006566667  | 0.1226       | 0.004066667 | 1.002822775 |
| -0.167066667 | 0.030133333  | 0.004033333 | 1.002799605 |
| 0.029866667  | 0.017766667  | 0.003955556 | 1.002745544 |
| 0.0398       | -0.0324      | 0.003944444 | 1.002737822 |
| 0.020766667  | 0.1675       | 0.003877778 | 1.002691486 |
| -0.2309      | -0.041633333 | 0.003866667 | 1.002683764 |
| -0.043733333 | 0.088533333  | 0.003855556 | 1.002676042 |
| 0.074733333  | 0.128333333  | 0.003844444 | 1.002668319 |
| -0.107833333 | -0.2469      | 0.003744444 | 1.002598822 |
| -0.053566667 | -0.043266667 | 0.003744444 | 1.002598822 |
| -0.033533333 | 0.034033333  | 0.003666667 | 1.002544772 |
| -0.001       | 0.0267       | 0.003655556 | 1.002537051 |
| 0.0253       | 0.0087       | 0.003655556 | 1.002537051 |
| 0.118733333  | 0.09         | 0.003622222 | 1.002513888 |
| 0.092266667  | 0.161        | 0.003533333 | 1.002452122 |
| 0.051266667  | 0.0579       | 0.003522222 | 1.002444401 |
| -0.052033333 | -0.072233333 | 0.003433333 | 1.002382639 |
| -0.088833333 | 0.081366667  | 0.003433333 | 1.002382639 |
| -0.6326      | -0.357666667 | 0.003422222 | 1.002374919 |
| -0.048833333 | -0.1454      | 0.003411111 | 1.002367199 |
| -0.032066667 | 0.101733333  | 0.003377778 | 1.00234404  |
| 0.003233333  | 0.208533333  | 0.003311111 | 1.002297723 |
| -0.029366667 | 0.066333333  | 0.0033      | 1.002290004 |
| 0.0887       | -0.0719      | 0.003277778 | 1.002274565 |
| -0.0757      | -0.038433333 | 0.003177778 | 1.002205095 |
| -0.0622      | 0.029366667  | 0.003144444 | 1.00218194  |
| -0.015866667 | -0.0965      | 0.003111111 | 1.002158785 |
| 0.012966667  | 0.031866667  | 0.003066667 | 1.002127912 |
| 0.129666667  | 0.001133333  | 0.002933333 | 1.0020353   |
| 0.069966667  | -0.0059      | 0.002911111 | 1.002019866 |
| 0.0491       | -0.067966667 | 0.0029      | 1.002012148 |
| -0.120366667 | -0.1042      | 0.002888889 | 1.002004431 |
| 0.0778       | -0.0627      | 0.002877778 | 1.001996714 |
| 0.012533333  | 0.0924       | 0.002866667 | 1.001988997 |
| -0.037066667 | -0.016566667 | 0.002855556 | 1.00198128  |
| -0.1155      | -0.261433333 | 0.002833333 | 1.001965847 |
| -0.214233333 | -0.076866667 | 0.002811111 | 1.001950413 |
| -0.163833333 | -0.086666667 | 0.002755556 | 1.001911831 |
| -0.034066667 | -0.0087      | 0.002688889 | 1.001865534 |
| 0.108        | -0.1007      | 0.002622222 | 1.001819239 |

|              |              |             |             |
|--------------|--------------|-------------|-------------|
| 0.115166667  | 0.1154       | 0.002588889 | 1.001796092 |
| 0.407233333  | -0.000966667 | 0.002466667 | 1.001711226 |
| -0.0876      | 0.1316       | 0.002422222 | 1.001680367 |
| -0.138233333 | -0.0948      | 0.002411111 | 1.001672652 |
| 0.221166667  | -0.023566667 | 0.002311111 | 1.001603224 |
| -0.166433333 | -0.092533333 | 0.002266667 | 1.001572368 |
| -0.1765      | -0.125566667 | 0.002255556 | 1.001564655 |
| -0.021266667 | -0.171866667 | 0.002255556 | 1.001564655 |
| -0.025566667 | -0.082966667 | 0.002233333 | 1.001549228 |
| 0.062833333  | -0.064166667 | 0.002211111 | 1.001533801 |
| -0.075033333 | 0.064833333  | 0.002166667 | 1.001502947 |
| 0.053966667  | 0.020666667  | 0.002144444 | 1.001487521 |
| -0.020066667 | -0.062933333 | 0.002122222 | 1.001472095 |
| 0.0764       | 0.003733333  | 0.002044444 | 1.001418105 |
| -0.026833333 | -0.026433333 | 0.001911111 | 1.001325559 |
| 0.0517       | -0.0954      | 0.001844444 | 1.001279289 |
| 0.015466667  | 0.0423       | 0.001766667 | 1.00122531  |
| 0.053533333  | -0.101       | 0.001755556 | 1.001217599 |
| -0.032366667 | -0.0753      | 0.001755556 | 1.001217599 |
| 0.2504       | -0.5219      | 0.001577778 | 1.00109423  |
| -0.033033333 | 0.025333333  | 0.001577778 | 1.00109423  |
| -0.0224      | -0.004633333 | 0.001533333 | 1.001063391 |
| 0.1089       | 0.1077       | 0.001522222 | 1.001055681 |
| -0.065533333 | -0.140733333 | 0.001511111 | 1.001047971 |
| 0.086433333  | -0.070033333 | 0.001411111 | 1.000978586 |
| 0.037666667  | 0.053533333  | 0.001333333 | 1.000924623 |
| -0.085533333 | 0.1496       | 0.001333333 | 1.000924623 |
| -0.025       | -0.1161      | 0.001166667 | 1.000808999 |
| -0.011866667 | 0.001066667  | 0.001166667 | 1.000808999 |
| -0.015833333 | 0.013766667  | 0.001144444 | 1.000793583 |
| 0.008033333  | -0.0833      | 0.001133333 | 1.000785875 |
| -0.014766667 | 0.0382       | 0.0011      | 1.000762753 |
| 0.016466667  | 0.087433333  | 0.001044444 | 1.000724216 |
| 0.051666667  | 0.033366667  | 0.001044444 | 1.000724216 |
| 0.046866667  | 0.025433333  | 0.001       | 1.000693387 |
| 0.1203       | 0.029233333  | 0.000977778 | 1.000677974 |
| 0.049166667  | 0.052966667  | 0.000933333 | 1.000647147 |
| -0.050033333 | 0.0235       | 0.000888889 | 1.000616321 |
| -0.0067      | 0.0076       | 0.000833333 | 1.00057779  |
| 0.133433333  | -0.0118      | 0.000833333 | 1.00057779  |
| 0.003166667  | 0.018766667  | 0.0008      | 1.000554672 |
| -0.024466667 | -0.046933333 | 0.000744444 | 1.000516143 |
| -0.092633333 | -0.102033333 | 0.000711111 | 1.000493026 |
| 0.105666667  | 0.0712       | 0.000588889 | 1.00040827  |
| -0.082633333 | -0.1053      | 0.000533333 | 1.000369747 |
| -0.097266667 | 0.034833333  | 0.000533333 | 1.000369747 |
| 0.2249       | 0.288566667  | 0.000488889 | 1.000338929 |



|              |              |              |             |
|--------------|--------------|--------------|-------------|
| 0.049366667  | -0.035466667 | 0.000344444  | 1.000238779 |
| -0.087266667 | -0.012833333 | 0.000333333  | 1.000231076 |
| 0.033133333  | 0.0106       | 0.000311111  | 1.000215669 |
| 0.0531       | -0.051333333 | 0.000311111  | 1.000215669 |
| -0.0045      | 0.014466667  | 0.000277778  | 1.000192559 |
| -0.074433333 | 0.064366667  | 0.000233333  | 1.000161747 |
| 0.178866667  | -0.497866667 | 0            | 1           |
| -0.074266667 | -0.075466667 | -6.66667E-05 | 0.999953791 |
| -0.088266667 | -0.094533333 | -0.000111111 | 0.999922987 |
| -0.047533333 | -0.215466667 | -0.000177778 | 0.999876781 |
| -0.117433333 | -0.030166667 | -0.000455556 | 0.999684283 |
| -0.028866667 | -0.020533333 | -0.000466667 | 0.999676584 |
| 0.186166667  | -0.675033333 | -0.000566667 | 0.999607294 |
| 0.279266667  | 0.190266667  | -0.0006      | 0.999584198 |
| -0.1077      | -0.081466667 | -0.000633333 | 0.999561103 |
| 0.073866667  | -0.140466667 | -0.0007      | 0.999514915 |
| -0.043966667 | 0.044833333  | -0.000755556 | 0.999476426 |
| 0.1108       | 0.046733333  | -0.000777778 | 0.999461031 |
| 0.015133333  | 0.197533333  | -0.0008      | 0.999445636 |
| -0.105666667 | -0.032       | -0.000988889 | 0.999314789 |
| -0.060333333 | -0.189233333 | -0.001066667 | 0.999260916 |
| 0.046466667  | -0.0155      | -0.001166667 | 0.999191655 |
| -0.046766667 | 0.041766667  | -0.001255556 | 0.999130094 |
| 0.314533333  | 0.186633333  | -0.001477778 | 0.998976207 |
| 0.042233333  | -0.069633333 | -0.001533333 | 0.998937739 |
| 0.019533333  | 0.003533333  | -0.001544444 | 0.998930045 |
| -0.153966667 | -0.123533333 | -0.001666667 | 0.998845422 |
| -0.184566667 | 0.004666667  | -0.001666667 | 0.998845422 |
| 0.055266667  | 0.0132       | -0.001788889 | 0.998760805 |
| -0.0031      | -0.052233333 | -0.001811111 | 0.998745421 |
| 0.119466667  | 0.0115       | -0.001844444 | 0.998722345 |
| 0.0082       | -0.0019      | -0.001866667 | 0.998706962 |
| 0.1353       | 0.074233333  | -0.0021      | 0.99854545  |
| 0.196033333  | -0.032666667 | -0.002111111 | 0.998537759 |
| 0.027433333  | 0.037433333  | -0.002222222 | 0.998460859 |
| 0.183766667  | 0.175233333  | -0.002388889 | 0.998345519 |
| 0.0788       | 0.176833333  | -0.002488889 | 0.998276321 |
| 0.112433333  | 0.022066667  | -0.002511111 | 0.998260944 |
| -0.0862      | 0.075166667  | -0.002522222 | 0.998253256 |
| 0.082933333  | -0.059133333 | -0.002555556 | 0.998230192 |
| 0.016033333  | -0.014466667 | -0.002566667 | 0.998222504 |
| 0.030766667  | 0.114        | -0.002577778 | 0.998214816 |
| 0.057966667  | -0.0747      | -0.002588889 | 0.998207128 |
| 0.0015       | 0.0445       | -0.0026      | 0.99819944  |
| -0.028133333 | 0.043033333  | -0.002633333 | 0.998176377 |
| -0.064566667 | 0.090766667  | -0.002666667 | 0.998153315 |
| -0.101833333 | 0.060833333  | -0.002733333 | 0.998107191 |

|              |              |              |             |
|--------------|--------------|--------------|-------------|
| -0.038833333 | -0.017066667 | -0.002744444 | 0.998099504 |
| -0.1274      | -0.2184      | -0.002822222 | 0.998045697 |
| 0.069666667  | 0.099233333  | -0.002866667 | 0.998014951 |
| 0.0431       | 0.041233333  | -0.002988889 | 0.997930405 |
| 0.0632       | 0.0922       | -0.003044444 | 0.997891977 |
| 0.001533333  | -0.144166667 | -0.003133333 | 0.997830496 |
| -0.127633333 | -0.124133333 | -0.0032      | 0.997784387 |
| 0.003166667  | -0.042366667 | -0.003233333 | 0.997761334 |
| -0.030366667 | -0.018533333 | -0.003277778 | 0.997730597 |
| -0.064333333 | 0.022333333  | -0.003288889 | 0.997722912 |
| 0.0831       | 0.024133333  | -0.0033      | 0.997715228 |
| -0.035433333 | -0.016166667 | -0.003366667 | 0.997669125 |
| 0.188266667  | -0.5538      | -0.003411111 | 0.997638391 |
| -0.044066667 | -0.208133333 | -0.0035      | 0.997576925 |
| 0.067        | 0.0052       | -0.003522222 | 0.997561559 |
| -0.056366667 | 0.0236       | -0.003622222 | 0.997492416 |
| -0.015733333 | -0.0117      | -0.003855556 | 0.9973311   |
| 0.016633333  | -0.098166667 | -0.004       | 0.997231251 |
| 0.096        | 0.144066667  | -0.004022222 | 0.997215891 |
| 0.014133333  | 0.012933333  | -0.004022222 | 0.997215891 |
| -0.035166667 | 0.233866667  | -0.004044444 | 0.997200531 |
| 0.2828       | -0.186933333 | -0.004066667 | 0.997185171 |
| -0.007833333 | -0.020633333 | -0.004088889 | 0.997169811 |
| -0.1041      | -0.0881      | -0.004133333 | 0.997139092 |
| -0.0987      | 0.002066667  | -0.004133333 | 0.997139092 |
| -0.090633333 | 0.041566667  | -0.004155556 | 0.997123733 |
| -0.044133333 | 0.0584       | -0.004255556 | 0.99705462  |
| 0.066233333  | 0.0313       | -0.004277778 | 0.997039262 |
| 0.042033333  | 0.0312       | -0.004433333 | 0.996931764 |
| 0.019333333  | 0.044133333  | -0.004488889 | 0.996893375 |
| 0.067833333  | -0.032733333 | -0.004511111 | 0.99687802  |
| 0.131933333  | 0.1031       | -0.004533333 | 0.996862665 |
| -0.087866667 | -0.041566667 | -0.004633333 | 0.99679357  |
| 0.010833333  | 0.042166667  | -0.0047      | 0.996747509 |
| 0.0016       | 0.0227       | -0.004744444 | 0.996716803 |
| 0.0996       | 0.1253       | -0.004788889 | 0.996686098 |
| -0.074866667 | -0.0248      | -0.004844444 | 0.996647718 |
| 0.029333333  | -0.045266667 | -0.004955556 | 0.996570963 |
| -0.0705      | 0.1306       | -0.005033333 | 0.996517238 |
| -0.2915      | 0.1872       | -0.005122222 | 0.996455842 |
| 0.1615       | -0.143633333 | -0.005133333 | 0.996448167 |
| -0.054166667 | 0.0304       | -0.005144444 | 0.996440493 |
| -0.003766667 | 0.009366667  | -0.005188889 | 0.996409797 |
| -0.015933333 | 0.0987       | -0.005277778 | 0.996348407 |
| -0.025633333 | -0.000733333 | -0.005477778 | 0.996210293 |
| 0.008433333  | -0.038733333 | -0.0055      | 0.996194948 |
| 0.118766667  | -0.060266667 | -0.005522222 | 0.996179604 |

|              |              |              |             |
|--------------|--------------|--------------|-------------|
| 0.093133333  | -0.0285      | -0.005566667 | 0.996148915 |
| 0.016766667  | 0.1535       | -0.005611111 | 0.996118228 |
| -0.053033333 | -0.203633333 | -0.005688889 | 0.996064527 |
| -0.013866667 | 0.129433333  | -0.005788889 | 0.995995488 |
| 0.011733333  | -0.132133333 | -0.005833333 | 0.995964805 |
| -0.187133333 | -0.0188      | -0.005844444 | 0.995957134 |
| -0.176166667 | -0.113266667 | -0.006033333 | 0.995826744 |
| -0.102666667 | 0.0347       | -0.006044444 | 0.995819075 |
| 0.047333333  | 0.1865       | -0.006066667 | 0.995803736 |
| -0.0277      | 0.045433333  | -0.006077778 | 0.995796067 |
| -0.182866667 | 0.018433333  | -0.0061      | 0.995780728 |
| -0.000366667 | 0.0155       | -0.006111111 | 0.995773059 |
| 0.1162       | -0.08        | -0.006111111 | 0.995773059 |
| -0.086833333 | 0.007966667  | -0.0062      | 0.995711709 |
| -0.0326      | -0.131566667 | -0.006233333 | 0.995688703 |
| 0.001966667  | -0.048866667 | -0.006288889 | 0.995650362 |
| -0.045466667 | -0.105333333 | -0.006466667 | 0.995527679 |
| -0.045966667 | 0.016366667  | -0.006466667 | 0.995527679 |
| -0.0537      | -0.1089      | -0.006466667 | 0.995527679 |
| -0.126166667 | -0.081333333 | -0.006477778 | 0.995520012 |
| 0.046333333  | 0.0203       | -0.0065      | 0.995504678 |
| 0.079        | -0.075533333 | -0.006522222 | 0.995489344 |
| -0.096633333 | 0.1117       | -0.006522222 | 0.995489344 |
| -0.006666667 | 0.0447       | -0.006644444 | 0.995405011 |
| -0.1864      | 0.032533333  | -0.006666667 | 0.995389679 |
| 0.115866667  | 0.0959       | -0.006833333 | 0.995274694 |
| -0.080066667 | -0.164633333 | -0.006888889 | 0.995236368 |
| 0.0763       | 0.048233333  | -0.006888889 | 0.995236368 |
| -0.1292      | -0.0761      | -0.0069      | 0.995228703 |
| -0.037066667 | 0.2009       | -0.006944444 | 0.995198044 |
| -0.0877      | -0.1455      | -0.006955556 | 0.99519038  |
| -0.050433333 | -0.215066667 | -0.006966667 | 0.995182715 |
| 0.0964       | 0.063433333  | -0.006977778 | 0.995175051 |
| 0.072766667  | 0.258566667  | -0.007033333 | 0.995136729 |
| 0.011033333  | -0.011133333 | -0.007077778 | 0.995106073 |
| -0.089833333 | -0.169966667 | -0.007088889 | 0.995098409 |
| -0.057266667 | -0.012366667 | -0.007166667 | 0.995044763 |
| 0.0225       | 0.0519       | -0.007166667 | 0.995044763 |
| -0.1118      | -0.191966667 | -0.007177778 | 0.9950371   |
| -0.069166667 | -0.149666667 | -0.007188889 | 0.995029436 |
| 0.041366667  | 0.247833333  | -0.007255556 | 0.994983457 |
| 0.070366667  | -0.0218      | -0.007277778 | 0.994968131 |
| 0.130433333  | -0.234433333 | -0.0073      | 0.994952806 |
| 0.037066667  | -0.062833333 | -0.007355556 | 0.994914493 |
| -0.1275      | -0.1194      | -0.007411111 | 0.994876181 |
| -0.108933333 | 0.011966667  | -0.0076      | 0.994745933 |
| 0.065366667  | -0.079066667 | -0.0077      | 0.994676984 |

|              |              |              |             |
|--------------|--------------|--------------|-------------|
| -0.041733333 | 0.028433333  | -0.007777778 | 0.994623361 |
| -0.014566667 | 0.0029       | -0.007844444 | 0.994577401 |
| -0.0832      | 0.096266667  | -0.007866667 | 0.994562081 |
| -0.0957      | 0.099066667  | -0.007922222 | 0.994523783 |
| 0.099166667  | -0.090733333 | -0.007977778 | 0.994485487 |
| 0.456733333  | -0.062866667 | -0.008044444 | 0.994439533 |
| 0.056766667  | -0.1432      | -0.008088889 | 0.994408898 |
| -0.1161      | -0.1511      | -0.008155556 | 0.994362948 |
| -0.115766667 | -0.148433333 | -0.0083      | 0.994263396 |
| -0.0677      | -0.070633333 | -0.008366667 | 0.994217452 |
| -0.138733333 | -0.0056      | -0.008455556 | 0.994156197 |
| -0.1118      | 0.221666667  | -0.0086      | 0.994056666 |
| -0.1198      | -0.095766667 | -0.008611111 | 0.99404901  |
| -0.064866667 | 0.070866667  | -0.0087      | 0.993987766 |
| 0.238133333  | -0.0245      | -0.0087      | 0.993987766 |
| -0.042633333 | 0.295566667  | -0.0088      | 0.99391887  |
| -0.0269      | -0.072733333 | -0.008911111 | 0.993842325 |
| 0.034666667  | 0.029633333  | -0.008955556 | 0.993811709 |
| 0.098        | 0.162066667  | -0.008988889 | 0.993788747 |
| 0.144833333  | -0.020466667 | -0.009011111 | 0.99377344  |
| -0.014366667 | -0.1621      | -0.009066667 | 0.993735172 |
| -0.0634      | -0.0647      | -0.009144444 | 0.9936816   |
| -0.259866667 | -0.048133333 | -0.009166667 | 0.993666294 |
| 0.040633333  | -0.122766667 | -0.009266667 | 0.993597421 |
| 0.070633333  | -0.159833333 | -0.009388889 | 0.993513249 |
| -0.0427      | -0.0105      | -0.009477778 | 0.993452037 |
| -0.0636      | 0.1221       | -0.009511111 | 0.993429084 |
| -0.014066667 | 0.033633333  | -0.009622222 | 0.993352576 |
| 0.0044       | -0.002533333 | -0.009644444 | 0.993337276 |
| -0.118533333 | -0.0067      | -0.009855556 | 0.99319193  |
| 0.067766667  | 0.067633333  | -0.009955556 | 0.99312309  |
| 0.0624       | 0.0838       | -0.010055556 | 0.993054254 |
| 0.216133333  | -0.028266667 | -0.0101      | 0.993023662 |
| 0.128466667  | -0.1107      | -0.010111111 | 0.993016014 |
| -0.0425      | 0.061033333  | -0.010122222 | 0.993008366 |
| 0.079566667  | 0.002833333  | -0.010122222 | 0.993008366 |
| 0.073933333  | 0.043166667  | -0.010144444 | 0.992993071 |
| 0.040966667  | -0.004933333 | -0.010144444 | 0.992993071 |
| 0.1843       | 0.248666667  | -0.010188889 | 0.992962481 |
| 0.072566667  | 0.277433333  | -0.010311111 | 0.992878362 |
| 0.042466667  | 0.095        | -0.010433333 | 0.992794251 |
| -0.093266667 | 0.0948       | -0.010466667 | 0.992771313 |
| -0.116633333 | 0.0193       | -0.010633333 | 0.99265663  |
| -0.1181      | -0.0012      | -0.010666667 | 0.992633695 |
| 0.071        | 0.2792       | -0.010722222 | 0.992595471 |
| -0.011133333 | 0.3493       | -0.010755556 | 0.992572538 |
| 0.164366667  | 0.0446       | -0.010777778 | 0.992557249 |

|              |              |              |             |
|--------------|--------------|--------------|-------------|
| -0.0029      | -0.0993      | -0.0108      | 0.992541961 |
| -0.106       | -0.103366667 | -0.010822222 | 0.992526672 |
| -0.1025      | -0.0051      | -0.010833333 | 0.992519028 |
| 0.005466667  | -0.085966667 | -0.010977778 | 0.992419661 |
| 0.043966667  | -0.012866667 | -0.011       | 0.992404375 |
| -0.0434      | -0.111133333 | -0.0111      | 0.992335589 |
| -0.21        | 0.3965       | -0.0111      | 0.992335589 |
| 0.105333333  | -0.304066667 | -0.011122222 | 0.992320304 |
| 0.1389       | -0.141633333 | -0.011122222 | 0.992320304 |
| 0.009533333  | -0.010633333 | -0.011133333 | 0.992312661 |
| 0.119066667  | -0.226566667 | -0.011144444 | 0.992305019 |
| -0.070633333 | 0.067366667  | -0.011144444 | 0.992305019 |
| 0.035866667  | 0.000633333  | -0.011155556 | 0.992297377 |
| -0.152833333 | 0.0015       | -0.011255556 | 0.992228598 |
| -0.058666667 | -0.073666667 | -0.011255556 | 0.992228598 |
| 0.0483       | -0.0101      | -0.011255556 | 0.992228598 |
| 0.075266667  | -0.0435      | -0.011255556 | 0.992228598 |
| -0.0374      | -0.0345      | -0.011288889 | 0.992205673 |
| 0.053366667  | 0.045733333  | -0.011344444 | 0.992167466 |
| -0.160233333 | 0.174933333  | -0.011355556 | 0.992159824 |
| 0.054133333  | 0.070033333  | -0.011377778 | 0.992144542 |
| -0.1138      | 0.029833333  | -0.011455556 | 0.992091056 |
| 0.044166667  | 0.383233333  | -0.011455556 | 0.992091056 |
| -0.029733333 | -0.022866667 | -0.011488889 | 0.992068134 |
| 0.1849       | 0.162333333  | -0.011522222 | 0.992045212 |
| -0.054433333 | -0.0611      | -0.011544444 | 0.992029932 |
| -0.141666667 | -0.672       | -0.011577778 | 0.992007011 |
| 0.020733333  | 0.0257       | -0.011577778 | 0.992007011 |
| 0.072466667  | -0.010966667 | -0.011622222 | 0.991976451 |
| -0.2181      | -0.048866667 | -0.011644444 | 0.991961172 |
| -0.0081      | 0.1576       | -0.011655556 | 0.991953532 |
| -0.0791      | -0.3275      | -0.011677778 | 0.991938253 |
| -0.117966667 | -0.239233333 | -0.0117      | 0.991922974 |
| 0.020133333  | -0.037366667 | -0.011711111 | 0.991915334 |
| -0.018033333 | -0.088533333 | -0.011722222 | 0.991907695 |
| -0.1369      | -0.002766667 | -0.011966667 | 0.991739645 |
| -0.055833333 | -0.206933333 | -0.011977778 | 0.991732007 |
| 0.0537       | -0.112333333 | -0.011977778 | 0.991732007 |
| -0.082633333 | 0.0051       | -0.011977778 | 0.991732007 |
| 0.0155       | -3.33E-05    | -0.012044444 | 0.99168618  |
| -0.070833333 | 0.036        | -0.012166667 | 0.99160217  |
| -0.0644      | -0.0599      | -0.0122      | 0.991579259 |
| -0.071566667 | 0.013933333  | -0.012333333 | 0.991487622 |
| 0.023733333  | 0.0471       | -0.012333333 | 0.991487622 |
| -0.040166667 | -0.054766667 | -0.012455556 | 0.991403629 |
| 0.024266667  | -0.035333333 | -0.012477778 | 0.991388358 |
| 0.0551       | -0.3294      | -0.012544444 | 0.991342547 |

|              |              |              |             |
|--------------|--------------|--------------|-------------|
| -0.073833333 | 0.022566667  | -0.012611111 | 0.991296738 |
| 0.0644       | 0.056366667  | -0.012622222 | 0.991289104 |
| -0.168333333 | 0.102466667  | -0.012655556 | 0.991266201 |
| 0.097633333  | 0.021766667  | -0.0127      | 0.991235663 |
| -0.056366667 | -0.073966667 | -0.012711111 | 0.991228029 |
| -0.010466667 | -0.223833333 | -0.012777778 | 0.991182226 |
| 0.0203       | -0.085666667 | -0.012788889 | 0.991174592 |
| -0.0646      | -0.116033333 | -0.012844444 | 0.991136425 |
| -0.168766667 | 0.048633333  | -0.012877778 | 0.991113525 |
| -0.189633333 | -0.1372      | -0.012877778 | 0.991113525 |
| -0.137266667 | -0.187466667 | -0.012933333 | 0.99107536  |
| -0.094033333 | 0.0152       | -0.012933333 | 0.99107536  |
| -0.048966667 | -0.056533333 | -0.013       | 0.991029563 |
| 0.018766667  | -0.013166667 | -0.013077778 | 0.990976137 |
| 0.031866667  | 0.011466667  | -0.013155556 | 0.990922713 |
| 0.163833333  | 0.120566667  | -0.013255556 | 0.99085403  |
| -0.0936      | -0.006266667 | -0.013311111 | 0.990815875 |
| 0.026566667  | 0.028333333  | -0.013477778 | 0.990701418 |
| -0.134566667 | -0.048066667 | -0.013555556 | 0.990648009 |
| -0.0057      | 0.0661       | -0.0136      | 0.990617491 |
| -0.0523      | 0.0485       | -0.013611111 | 0.990609862 |
| 0.001933333  | 0.001933333  | -0.0137      | 0.990548829 |
| 0.003033333  | 0.008        | -0.013711111 | 0.990541201 |
| -0.051266667 | 0.018        | -0.013733333 | 0.990525943 |
| 0.2315       | -0.064433333 | -0.013866667 | 0.990434403 |
| -0.139033333 | 0.1286       | -0.013877778 | 0.990426775 |
| 0.120233333  | 0.065066667  | -0.013944444 | 0.990381009 |
| 0.044866667  | 0.076466667  | -0.014144444 | 0.990243723 |
| -0.182       | -0.087033333 | -0.014166667 | 0.99022847  |
| -0.005733333 | -0.404366667 | -0.014211111 | 0.990197965 |
| 0.058966667  | 0.0011       | -0.014377778 | 0.990083579 |
| -0.028733333 | 0.068933333  | -0.014444444 | 0.990037829 |
| 0.053466667  | 0.117333333  | -0.014444444 | 0.990037829 |
| 0.226233333  | 0.088066667  | -0.014488889 | 0.990007329 |
| -0.028566667 | 0.095366667  | -0.0145      | 0.989999705 |
| 0.0016       | -0.016266667 | -0.014511111 | 0.98999208  |
| 0.061033333  | 0.0022       | -0.014511111 | 0.98999208  |
| 0.105        | 0.0043       | -0.014655556 | 0.989892966 |
| 0.1134       | 0.018133333  | -0.014955556 | 0.989687145 |
| -0.036166667 | 0.0299       | -0.015055556 | 0.989618547 |
| -0.092466667 | -0.169733333 | -0.015055556 | 0.989618547 |
| 0.159533333  | 0.002066667  | -0.015111111 | 0.98958044  |
| 0.037566667  | 0.0295       | -0.015333333 | 0.989428024 |
| 0.229566667  | 0.1004       | -0.015355556 | 0.989412783 |
| 0.011133333  | 0.071166667  | -0.015377778 | 0.989397543 |
| 0.039366667  | 0.000866667  | -0.015377778 | 0.989397543 |
| 0.003133333  | 0.1703       | -0.015455556 | 0.989344205 |

|              |              |              |             |
|--------------|--------------|--------------|-------------|
| 0.034533333  | -0.032066667 | -0.015455556 | 0.989344205 |
| -0.1364      | -0.175633333 | -0.015544444 | 0.98928325  |
| 0.153033333  | -0.075366667 | -0.015677778 | 0.989191825 |
| -0.0994      | -0.1261      | -0.015722222 | 0.989161352 |
| 0.0427       | -0.046333333 | -0.015766667 | 0.98913088  |
| -0.0703      | 0.059933333  | -0.015777778 | 0.989123262 |
| 0.0353       | -0.453433333 | -0.015822222 | 0.989092791 |
| -0.0791      | -0.179466667 | -0.015911111 | 0.989031852 |
| 0.138933333  | -0.098433333 | -0.015922222 | 0.989024235 |
| -0.009766667 | -0.075633333 | -0.015977778 | 0.98898615  |
| -0.1386      | -0.087433333 | -0.016033333 | 0.988948067 |
| -0.041866667 | -0.1464      | -0.016044444 | 0.98894045  |
| 0.004133333  | -0.143266667 | -0.0161      | 0.988902369 |
| 0.0119       | 0.0217       | -0.016177778 | 0.988849057 |
| 0.0118       | 0.081666667  | -0.016288889 | 0.988772902 |
| -0.3498      | -0.126066667 | -0.016455556 | 0.988658681 |
| -0.035033333 | 0.038966667  | -0.016477778 | 0.988643453 |
| 0.039066667  | -0.0297      | -0.016633333 | 0.98853686  |
| -0.1377      | 0.086        | -0.016655556 | 0.988521634 |
| 0.088433333  | -0.085166667 | -0.016655556 | 0.988521634 |
| 0.112366667  | 0.140966667  | -0.016666667 | 0.98851402  |
| -0.1474      | 0.030333333  | -0.016677778 | 0.988506407 |
| -0.0347      | 0.060666667  | -0.016688889 | 0.988498794 |
| -0.034966667 | -0.0081      | -0.016788889 | 0.988430279 |
| -0.108566667 | 0.109        | -0.0168      | 0.988422666 |
| -0.0296      | -0.026333333 | -0.016811111 | 0.988415054 |
| 0.010733333  | -0.104666667 | -0.016866667 | 0.988376993 |
| 0.026833333  | -0.047       | -0.016866667 | 0.988376993 |
| 0.010833333  | 0.004533333  | -0.0169      | 0.988354157 |
| -0.152466667 | -0.006233333 | -0.0169      | 0.988354157 |
| -0.000133333 | -0.133666667 | -0.017       | 0.988285652 |
| 0.001466667  | -0.235566667 | -0.0172      | 0.988148656 |
| 0.15         | -0.007233333 | -0.017222222 | 0.988133435 |
| 0.043166667  | 0.1384       | -0.017255556 | 0.988110604 |
| -0.011433333 | 0.050733333  | -0.017277778 | 0.988095384 |
| -0.0276      | 0.059533333  | -0.017366667 | 0.988034507 |
| -0.084533333 | -0.056433333 | -0.017388889 | 0.988019288 |
| 0.0991       | -0.031666667 | -0.017388889 | 0.988019288 |
| 0.068166667  | -0.092333333 | -0.017533333 | 0.987920371 |
| -0.0731      | -0.167633333 | -0.017588889 | 0.987882329 |
| -0.039366667 | 0.120666667  | -0.017588889 | 0.987882329 |
| -0.0282      | -0.068433333 | -0.017633333 | 0.987851896 |
| -0.0216      | 0.004733333  | -0.017655556 | 0.98783668  |
| 0.244533333  | 0.0639       | -0.017677778 | 0.987821464 |
| -0.0623      | -0.200666667 | -0.017788889 | 0.987745389 |
| 0.011133333  | -0.066366667 | -0.0179      | 0.987669319 |
| -0.096733333 | 0.041566667  | -0.018022222 | 0.987585649 |

|              |              |              |             |
|--------------|--------------|--------------|-------------|
| -0.003433333 | -0.020133333 | -0.018088889 | 0.987540014 |
| -0.0377      | 0.077266667  | -0.018133333 | 0.987509592 |
| -0.017966667 | -0.158933333 | -0.018166667 | 0.987486776 |
| -0.001733333 | 0.191166667  | -0.018288889 | 0.987403122 |
| 0.0486       | -0.095466667 | -0.0183      | 0.987395517 |
| 0.003733333  | -0.1042      | -0.018311111 | 0.987387912 |
| 0.134566667  | -0.1426      | -0.018311111 | 0.987387912 |
| 0.099933333  | -0.032733333 | -0.018466667 | 0.987281455 |
| 0.091366667  | 0.071766667  | -0.018588889 | 0.987197818 |
| 0.033033333  | 0.0684       | -0.018644444 | 0.987159804 |
| -0.2345      | -0.239966667 | -0.018666667 | 0.987144598 |
| -0.102366667 | 0.146066667  | -0.018677778 | 0.987136996 |
| 0.0607       | -0.0257      | -0.018722222 | 0.987106586 |
| 0.006766667  | 0.034133333  | -0.018733333 | 0.987098984 |
| -0.086333333 | -0.022266667 | -0.018788889 | 0.987060973 |
| 0.023966667  | 0.1383       | -0.018811111 | 0.987045769 |
| -0.093566667 | -0.060966667 | -0.0189      | 0.986984956 |
| -0.184666667 | -0.088633333 | -0.018922222 | 0.986969753 |
| 0.018166667  | -0.067166667 | -0.018988889 | 0.986924147 |
| 0.027666667  | -0.065566667 | -0.019011111 | 0.986908945 |
| -0.093866667 | -0.165933333 | -0.019033333 | 0.986893744 |
| 0.006866667  | 0.094366667  | -0.019088889 | 0.986855741 |
| 0.0377       | 0.087333333  | -0.019111111 | 0.98684054  |
| -0.0237      | 0.018466667  | -0.019111111 | 0.98684054  |
| 0.029966667  | -0.062233333 | -0.019155556 | 0.986810139 |
| 0.030533333  | -0.160333333 | -0.019266667 | 0.986734142 |
| -0.0861      | -0.057233333 | -0.019266667 | 0.986734142 |
| -0.043       | 0.0609       | -0.019311111 | 0.986703744 |
| 0.160933333  | -0.458833333 | -0.019488889 | 0.986582164 |
| -0.309566667 | -0.166033333 | -0.019577778 | 0.98652138  |
| -0.081766667 | 0.0272       | -0.019633333 | 0.986483391 |
| 0.184366667  | -0.5373      | -0.019666667 | 0.986460599 |
| 0.020133333  | -0.072033333 | -0.019777778 | 0.986384628 |
| 0.000166667  | -0.011133333 | -0.019855556 | 0.986331452 |
| 0.286933333  | 0.032533333  | -0.0199      | 0.986301067 |
| 0.136266667  | 0.213033333  | -0.019944444 | 0.986270683 |
| -0.0349      | -0.075766667 | -0.02        | 0.986232704 |
| -0.048133333 | -0.115866667 | -0.020055556 | 0.986194727 |
| -0.202566667 | -0.221566667 | -0.020066667 | 0.986187132 |
| -0.094233333 | 0.0294       | -0.020077778 | 0.986179537 |
| -0.163       | -0.092166667 | -0.020133333 | 0.986141561 |
| 0.353333333  | -0.0442      | -0.020155556 | 0.986126372 |
| -0.066666667 | -0.1242      | -0.020222222 | 0.986080804 |
| 0.156533333  | 0.2402       | -0.020244444 | 0.986065615 |
| -0.0558      | -0.0295      | -0.020244444 | 0.986065615 |
| -0.1057      | 0.104866667  | -0.020244444 | 0.986065615 |
| 0.0857       | 0.039233333  | -0.020277778 | 0.986042833 |



|              |              |              |             |
|--------------|--------------|--------------|-------------|
| 0.049266667  | -0.1165      | -0.020311111 | 0.98602005  |
| 0.095466667  | -0.077566667 | -0.020355556 | 0.985989675 |
| -0.162       | -0.1617      | -0.020388889 | 0.985966894 |
| 0.0049       | 0.136666667  | -0.020444444 | 0.985928927 |
| -0.0852      | -0.026966667 | -0.020633333 | 0.98579985  |
| 0.0229       | 0.1774       | -0.020677778 | 0.985769481 |
| -0.164166667 | -0.215633333 | -0.020688889 | 0.985761889 |
| 0.0318       | -0.0119      | -0.020711111 | 0.985746706 |
| -0.002666667 | 0.054166667  | -0.020877778 | 0.985632834 |
| 0.089366667  | 0.023933333  | -0.0209      | 0.985617652 |
| -0.0947      | -0.0048      | -0.020922222 | 0.985602471 |
| 0.055066667  | -0.100366667 | -0.020988889 | 0.985556927 |
| -0.123966667 | 0.011733333  | -0.021022222 | 0.985534156 |
| -0.124133333 | -0.101266667 | -0.021044444 | 0.985518976 |
| -0.0082      | -0.0236      | -0.021055556 | 0.985511386 |
| -0.054066667 | 0.013533333  | -0.021222222 | 0.985397542 |
| -0.060666667 | -0.023566667 | -0.021422222 | 0.985260946 |
| 0.008866667  | 0.031666667  | -0.021422222 | 0.985260946 |
| -0.122133333 | -0.0345      | -0.021544444 | 0.98517748  |
| -0.113966667 | -0.1381      | -0.021555556 | 0.985169893 |
| -0.018433333 | -0.056333333 | -0.0216      | 0.985139544 |
| 0.099233333  | 0.1302       | -0.021655556 | 0.985101609 |
| -0.089166667 | 0.0224       | -0.021877778 | 0.984949882 |
| -0.117966667 | -0.122866667 | -0.021911111 | 0.984927125 |
| -0.028966667 | -0.138866667 | -0.021922222 | 0.98491954  |
| 0.058433333  | 0.0576       | -0.021966667 | 0.984889198 |
| -0.122766667 | 0.027533333  | -0.021977778 | 0.984881613 |
| -0.010366667 | -0.060033333 | -0.022011111 | 0.984858858 |
| 0.264066667  | -0.1379      | -0.022011111 | 0.984858858 |
| 0.020366667  | 0.0039       | -0.022011111 | 0.984858858 |
| -0.011433333 | 0.0056       | -0.022055556 | 0.984828518 |
| 0.029833333  | -0.084833333 | -0.022066667 | 0.984820933 |
| 0.052033333  | -0.068066667 | -0.022066667 | 0.984820933 |
| -0.1403      | 0.009666667  | -0.022088889 | 0.984805764 |
| -0.200133333 | -0.153866667 | -0.022166667 | 0.984752673 |
| -0.0281      | -0.092       | -0.022177778 | 0.984745089 |
| -0.076766667 | -0.060833333 | -0.022211111 | 0.984722337 |
| -0.046266667 | 0.025933333  | -0.022244444 | 0.984699585 |
| -0.0861      | -0.257433333 | -0.022244444 | 0.984699585 |
| -0.0681      | -0.008466667 | -0.022244444 | 0.984699585 |
| -0.123733333 | -0.085033333 | -0.022288889 | 0.984669251 |
| -0.118333333 | -0.016266667 | -0.022311111 | 0.984654083 |
| -0.040466667 | -0.0709      | -0.022311111 | 0.984654083 |
| -0.0023      | -0.2017      | -0.022322222 | 0.9846465   |
| 0.084166667  | 0.0186       | -0.022411111 | 0.984585835 |
| 0.030633333  | 0.0381       | -0.022411111 | 0.984585835 |
| 0.123866667  | 0.1215       | -0.022422222 | 0.984578252 |

|              |              |              |             |
|--------------|--------------|--------------|-------------|
| -0.024333333 | 0.0375       | -0.022477778 | 0.984540338 |
| 0.138033333  | -0.024533333 | -0.022488889 | 0.984532756 |
| -0.052166667 | -0.110733333 | -0.022622222 | 0.98444177  |
| -0.060833333 | -0.084233333 | -0.022633333 | 0.984434188 |
| -0.1169      | -0.197833333 | -0.022811111 | 0.984312888 |
| -0.059       | -0.077633333 | -0.023022222 | 0.984168862 |
| -0.084866667 | -0.019       | -0.023044444 | 0.984153703 |
| -0.039033333 | 0.0318       | -0.023088889 | 0.984123385 |
| 0.014866667  | 0.037966667  | -0.023088889 | 0.984123385 |
| 0.009966667  | 0.070333333  | -0.023111111 | 0.984108227 |
| -0.0515      | 0.0261       | -0.023122222 | 0.984100647 |
| -0.041833333 | -0.091433333 | -0.023155556 | 0.98407791  |
| -0.034333333 | -0.111666667 | -0.023188889 | 0.984055173 |
| -0.132233333 | 0.056033333  | -0.0233      | 0.983979388 |
| -0.083066667 | -0.1146      | -0.023377778 | 0.983926342 |
| 0.0332       | -0.166033333 | -0.023522222 | 0.983827835 |
| 0.004433333  | 0.1425       | -0.023522222 | 0.983827835 |
| 0.010466667  | -0.0354      | -0.023588889 | 0.983782373 |
| -0.0233      | -0.124566667 | -0.0236      | 0.983774797 |
| -0.045666667 | 0.0184       | -0.023622222 | 0.983759643 |
| -0.0764      | -0.049366667 | -0.023711111 | 0.983699033 |
| -0.003733333 | 0.0259       | -0.023888889 | 0.983577823 |
| -0.093566667 | -0.0667      | -0.0239      | 0.983570248 |
| -0.158433333 | -0.134633333 | -0.023977778 | 0.983517223 |
| 0.1006       | -0.037033333 | -0.023988889 | 0.983509649 |
| 0.0007       | 0.000866667  | -0.024055556 | 0.983464202 |
| 0.049933333  | 0.1284       | -0.024066667 | 0.983456628 |
| -0.002433333 | 0.068066667  | -0.024244444 | 0.983335448 |
| -0.1412      | -0.080366667 | -0.024266667 | 0.983320301 |
| 0.001233333  | 0.0098       | -0.024333333 | 0.983274863 |
| -0.169233333 | -0.111433333 | -0.024377778 | 0.983244572 |
| 0.078766667  | 0.209433333  | -0.0244      | 0.983229427 |
| 0.018033333  | 0.1015       | -0.024422222 | 0.983214282 |
| 0.2172       | -0.085433333 | -0.024544444 | 0.98313099  |
| -0.0523      | 0.127833333  | -0.0246      | 0.983093132 |
| -0.074333333 | -0.1426      | -0.024644444 | 0.983062847 |
| -0.125633333 | -0.0232      | -0.024688889 | 0.983032563 |
| -0.013166667 | -0.3086      | -0.024788889 | 0.982964426 |
| -0.008366667 | -0.0845      | -0.024911111 | 0.982881155 |
| -0.145833333 | -0.013066667 | -0.024933333 | 0.982866016 |
| 0.008366667  | 0.1102       | -0.024944444 | 0.982858446 |
| -0.058       | -0.1641      | -0.024988889 | 0.982828168 |
| -0.083766667 | 0.019866667  | -0.025055556 | 0.982782753 |
| -0.142533333 | -0.079       | -0.025144444 | 0.982722202 |
| -0.039366667 | -0.013766667 | -0.025222222 | 0.982669224 |
| -0.042       | 0.0284       | -0.025233333 | 0.982661656 |
| -0.014933333 | 0.039666667  | -0.0253      | 0.982616248 |

|              |              |              |             |
|--------------|--------------|--------------|-------------|
| 0.0805       | 0.181433333  | -0.025377778 | 0.982563275 |
| 0.0225       | 0.133266667  | -0.025388889 | 0.982555708 |
| -0.204066667 | -0.0656      | -0.025455556 | 0.982510305 |
| -0.020066667 | -0.097666667 | -0.0255      | 0.982480038 |
| 0.023633333  | 0.013633333  | -0.025633333 | 0.982389242 |
| 0.0305       | -0.0542      | -0.025677778 | 0.982358978 |
| -0.031466667 | -0.047833333 | -0.025755556 | 0.982306019 |
| 0.0171       | -0.102033333 | -0.025777778 | 0.982290889 |
| -0.042866667 | -0.004933333 | -0.025788889 | 0.982283323 |
| -0.008066667 | -0.0521      | -0.025877778 | 0.982222804 |
| 0.1479       | 0.134133333  | -0.025922222 | 0.982192545 |
| -0.0599      | -0.011866667 | -0.025966667 | 0.982162288 |
| 0.044933333  | 0.039066667  | -0.0261      | 0.982071521 |
| -0.0369      | 0.250533333  | -0.026111111 | 0.982063957 |
| -0.044133333 | -0.0128      | -0.0262      | 0.982003451 |
| -0.182433333 | 0.0965       | -0.026222222 | 0.981988325 |
| 0.130866667  | 0.0939       | -0.026344444 | 0.981905137 |
| 0.009        | -0.009633333 | -0.0264      | 0.981867326 |
| -0.1416      | -0.151       | -0.026555556 | 0.981761464 |
| 0.013166667  | -0.271366667 | -0.026566667 | 0.981753903 |
| -0.0876      | -0.0136      | -0.026733333 | 0.981640493 |
| 0.1168       | 0.0093       | -0.026744444 | 0.981632933 |
| -0.135633333 | 0.118633333  | -0.026744444 | 0.981632933 |
| -0.095833333 | -0.0785      | -0.026866667 | 0.981549774 |
| 0.0327       | 0.2218       | -0.0269      | 0.981527096 |
| -0.033533333 | -0.0239      | -0.027       | 0.981459064 |
| -0.036666667 | 0.0164       | -0.027       | 0.981459064 |
| -0.198066667 | -0.380066667 | -0.027122222 | 0.98137592  |
| -0.024466667 | 0.040966667  | -0.027133333 | 0.981368362 |
| 0.0761       | 0.052        | -0.027133333 | 0.981368362 |
| 0.0066       | -0.1393      | -0.027155556 | 0.981353246 |
| -0.073933333 | -0.285033333 | -0.027166667 | 0.981345688 |
| -0.1638      | -0.015066667 | -0.027188889 | 0.981330572 |
| -0.0148      | 0.006633333  | -0.027255556 | 0.981285226 |
| -0.1571      | 0.0771       | -0.027266667 | 0.981277668 |
| 0.051        | 0.0604       | -0.027333333 | 0.981232325 |
| -0.025366667 | 0.066566667  | -0.027388889 | 0.98119454  |
| -0.153766667 | -0.160366667 | -0.027477778 | 0.981134088 |
| -0.141466667 | 0.006        | -0.027644444 | 0.981020749 |
| -0.117366667 | -0.0097      | -0.027655556 | 0.981013194 |
| 0.206166667  | 0.1031       | -0.027722222 | 0.980967862 |
| -0.234766667 | 0.147866667  | -0.027766667 | 0.980937642 |
| 0.0434       | -0.0491      | -0.0278      | 0.980914978 |
| -0.11        | 0.001466667  | -0.027988889 | 0.980786558 |
| -0.0136      | -0.187666667 | -0.028022222 | 0.980763897 |
| 0.178966667  | 0.328766667  | -0.028055556 | 0.980741237 |
| -0.1377      | 0.0262       | -0.028088889 | 0.980718577 |

|              |              |              |             |
|--------------|--------------|--------------|-------------|
| 0.130066667  | 0.0855       | -0.028244444 | 0.980612839 |
| -0.015266667 | 0.125633333  | -0.0283      | 0.980575078 |
| -0.042433333 | -0.102533333 | -0.028344444 | 0.98054487  |
| 0.0091       | -0.066133333 | -0.028533333 | 0.980416498 |
| 0.167133333  | -0.013766667 | -0.028611111 | 0.980363644 |
| -0.029533333 | 0.1938       | -0.028688889 | 0.980310792 |
| -0.071733333 | -0.021966667 | -0.028733333 | 0.980280593 |
| -0.1918      | -0.059033333 | -0.028755556 | 0.980265494 |
| 0.003133333  | -0.009666667 | -0.028788889 | 0.980242845 |
| -0.0512      | -0.0223      | -0.028822222 | 0.980220197 |
| -0.022733333 | -0.056533333 | -0.028966667 | 0.980122061 |
| 0.059033333  | -0.005233333 | -0.028977778 | 0.980114512 |
| -0.0218      | -0.016433333 | -0.029033333 | 0.98007677  |
| 0.120333333  | 0.038866667  | -0.029088889 | 0.98003903  |
| -0.006433333 | 0.020433333  | -0.029166667 | 0.979986196 |
| -0.198133333 | -0.1208      | -0.029177778 | 0.979978649 |
| -0.060666667 | 0.051566667  | -0.029255556 | 0.979925818 |
| 0.172033333  | 0.025933333  | -0.029333333 | 0.97987299  |
| 0.031466667  | -0.0297      | -0.029355556 | 0.979857897 |
| -0.1995      | -0.047133333 | -0.029377778 | 0.979842804 |
| 0.0996       | 0.3176       | -0.029433333 | 0.979805073 |
| -0.060033333 | -0.070766667 | -0.029455556 | 0.979789981 |
| -0.0588      | 0.017733333  | -0.029477778 | 0.979774889 |
| -0.0207      | 0.024866667  | -0.029488889 | 0.979767343 |
| 0.004233333  | -0.0786      | -0.029533333 | 0.979737161 |
| -0.1         | -0.043166667 | -0.029677778 | 0.979639073 |
| -0.072       | -0.181333333 | -0.029755556 | 0.979586261 |
| -0.030833333 | 0.060633333  | -0.029766667 | 0.979578716 |
| -0.024633333 | 0.009933333  | -0.029855556 | 0.979518363 |
| 0.018466667  | -0.185966667 | -0.029888889 | 0.979495732 |
| 0.106        | -0.026433333 | -0.030155556 | 0.979314699 |
| -0.010833333 | -0.1581      | -0.030188889 | 0.979292073 |
| 0.053533333  | -0.362066667 | -0.030211111 | 0.979276988 |
| 0.063033333  | 0.196766667  | -0.030244444 | 0.979254363 |
| -0.0293      | 0.004966667  | -0.030366667 | 0.979171406 |
| -0.007666667 | 0.140066667  | -0.030455556 | 0.979111078 |
| 0.0076       | -0.006866667 | -0.0306      | 0.979013053 |
| -0.007866667 | 0.018633333  | -0.030666667 | 0.978967814 |
| 0.1677       | -0.227933333 | -0.030688889 | 0.978952735 |
| 0.242266667  | -0.086666667 | -0.030911111 | 0.978801956 |
| 0.0161       | -0.104333333 | -0.0311      | 0.978673812 |
| 0.067466667  | 0.101333333  | -0.031122222 | 0.978658737 |
| -0.1014      | -0.0024      | -0.031133333 | 0.9786512   |
| 0.020966667  | 0.056833333  | -0.031144444 | 0.978643662 |
| -0.089566667 | 0.0223       | -0.031155556 | 0.978636125 |
| -0.071733333 | -0.097466667 | -0.031233333 | 0.978583367 |
| 0.121333333  | -0.058366667 | -0.031244444 | 0.97857583  |

|              |              |              |             |
|--------------|--------------|--------------|-------------|
| -0.124233333 | -0.014133333 | -0.031311111 | 0.978530612 |
| -0.196566667 | 0.004433333  | -0.031422222 | 0.978455252 |
| -0.083833333 | -0.038133333 | -0.031566667 | 0.978357292 |
| -0.087466667 | 0.029733333  | -0.031577778 | 0.978349757 |
| 0.111066667  | 0.0261       | -0.031588889 | 0.978342223 |
| -0.072066667 | -0.021733333 | -0.031666667 | 0.97828948  |
| -0.284933333 | -0.030633333 | -0.031777778 | 0.978214139 |
| 0.014266667  | -0.113466667 | -0.031788889 | 0.978206605 |
| 0.0235       | -0.2053      | -0.031811111 | 0.978191538 |
| -0.027833333 | -0.081266667 | -0.031888889 | 0.978138803 |
| -0.0327      | 0.090933333  | -0.031966667 | 0.978086072 |
| 0.206333333  | 0.1958       | -0.032144444 | 0.977965553 |
| 0.043666667  | 0.1873       | -0.032211111 | 0.977920363 |
| -0.0554      | 0.0304       | -0.032233333 | 0.9779053   |
| 0.481466667  | 0.486933333  | -0.032322222 | 0.97784505  |
| -0.196166667 | 0.013533333  | -0.032344444 | 0.977829988 |
| -0.0879      | -0.1121      | -0.032366667 | 0.977814926 |
| -0.043633333 | 0.0261       | -0.032422222 | 0.977777273 |
| -0.114966667 | -0.161466667 | -0.032433333 | 0.977769743 |
| -0.074133333 | -0.0857      | -0.032488889 | 0.977732091 |
| -0.172       | 0.000233333  | -0.032633333 | 0.977634204 |
| -0.2981      | 0.192566667  | -0.032688889 | 0.977596558 |
| -0.0878      | -0.003033333 | -0.032688889 | 0.977596558 |
| -0.0653      | 0.0433       | -0.032688889 | 0.977596558 |
| 0.436        | 0.006466667  | -0.032711111 | 0.9775815   |
| 0.013733333  | -0.096266667 | -0.032711111 | 0.9775815   |
| -0.0509      | -0.092933333 | -0.032766667 | 0.977543856 |
| -0.129466667 | -0.1481      | -0.032777778 | 0.977536327 |
| 0.003966667  | 0.036733333  | -0.032844444 | 0.977491157 |
| -0.152866667 | -0.190433333 | -0.032911111 | 0.977445988 |
| 0.028        | 0.019133333  | -0.032955556 | 0.977415877 |
| -0.078833333 | -0.125033333 | -0.033011111 | 0.977378239 |
| -0.053166667 | -0.0415      | -0.033011111 | 0.977378239 |
| 0.302833333  | 0.1505       | -0.033033333 | 0.977363184 |
| -0.0576      | 0.112366667  | -0.033088889 | 0.977325549 |
| 0.0681       | -0.342       | -0.033133333 | 0.977295441 |
| 0.070033333  | -0.4621      | -0.033266667 | 0.977205124 |
| -0.185133333 | -0.223233333 | -0.033333333 | 0.977159968 |
| -0.008433333 | -0.057       | -0.033333333 | 0.977159968 |
| -0.000733333 | 0.069733333  | -0.033444444 | 0.977084714 |
| -0.1138      | 0.038        | -0.033455556 | 0.977077189 |
| -0.0119      | 0.0352       | -0.033466667 | 0.977069664 |
| -0.179133333 | -0.0235      | -0.033555556 | 0.977009465 |
| -0.109066667 | 0.010833333  | -0.0336      | 0.976979368 |
| -0.036466667 | -0.008566667 | -0.033644444 | 0.976949271 |
| 0.0254       | -0.036966667 | -0.033666667 | 0.976934223 |
| -0.0764      | -0.0727      | -0.033755556 | 0.976874033 |

|              |              |              |             |
|--------------|--------------|--------------|-------------|
| -0.0364      | -0.007       | -0.0338      | 0.976843939 |
| -0.000233333 | -0.0482      | -0.033822222 | 0.976828892 |
| 0.187733333  | -0.094066667 | -0.033855556 | 0.976806323 |
| 0.0919       | 0.0393       | -0.033922222 | 0.976761186 |
| -0.133833333 | -0.1638      | -0.033966667 | 0.976731096 |
| -0.038466667 | -0.1219      | -0.033977778 | 0.976723574 |
| 0.022833333  | -0.012833333 | -0.034011111 | 0.976701007 |
| 0.0631       | 0.0333       | -0.034033333 | 0.976685962 |
| 0.0452       | 0.0117       | -0.034133333 | 0.976618266 |
| -0.076766667 | 0.000733333  | -0.034144444 | 0.976610745 |
| -0.0843      | 0.006333333  | -0.034155556 | 0.976603223 |
| 0.169966667  | 0.045366667  | -0.034177778 | 0.97658818  |
| -0.244266667 | -0.408633333 | -0.034233333 | 0.976550574 |
| 0.132633333  | 0.305        | -0.034422222 | 0.976422725 |
| 0.065166667  | -0.0651      | -0.034455556 | 0.976400165 |
| -0.093       | -0.160933333 | -0.0346      | 0.976302412 |
| -0.0939      | 0.058433333  | -0.034644444 | 0.976272336 |
| -0.136433333 | -0.0537      | -0.034655556 | 0.976264817 |
| 0.058333333  | -0.001766667 | -0.034944444 | 0.976069347 |
| -0.0039      | 0.320933333  | -0.034955556 | 0.976061829 |
| -0.1937      | -0.092766667 | -0.035       | 0.976031761 |
| -0.225833333 | 0.1358       | -0.035066667 | 0.97598666  |
| -0.1662      | -0.110166667 | -0.035088889 | 0.975971626 |
| -0.130833333 | 0.0532       | -0.035088889 | 0.975971626 |
| 0.0587       | 0.018733333  | -0.035144444 | 0.975934044 |
| 0.157133333  | 0.1002       | -0.035144444 | 0.975934044 |
| -0.0851      | 0.010933333  | -0.0352      | 0.975896463 |
| 0.038933333  | 0.116333333  | -0.0352      | 0.975896463 |
| -0.041933333 | 0.046066667  | -0.035222222 | 0.975881432 |
| -0.077766667 | 0.0328       | -0.035233333 | 0.975873916 |
| 0.0677       | -0.178833333 | -0.0353      | 0.975828822 |
| -0.007766667 | 0.0345       | -0.035366667 | 0.97578373  |
| -0.0563      | 0.105733333  | -0.035444444 | 0.975731125 |
| -0.080533333 | -0.132133333 | -0.035488889 | 0.975701067 |
| -0.098733333 | -0.1143      | -0.0355      | 0.975693553 |
| 0.070933333  | 0.0151       | -0.035533333 | 0.97567101  |
| -0.039266667 | -0.105233333 | -0.035555556 | 0.975655981 |
| -0.167366667 | 0.0161       | -0.035644444 | 0.97559587  |
| 0.0772       | -0.0088      | -0.035711111 | 0.975550789 |
| -0.002833333 | 0.060233333  | -0.035711111 | 0.975550789 |
| -0.1028      | -0.239433333 | -0.035733333 | 0.975535762 |
| -0.013466667 | -0.120566667 | -0.035822222 | 0.975475658 |
| 0.049733333  | 0.0031       | -0.035944444 | 0.975393021 |
| 0.179233333  | -0.119633333 | -0.036144444 | 0.975257813 |
| -0.125566667 | 0.000833333  | -0.036166667 | 0.975242791 |
| 0.251633333  | -0.173166667 | -0.036166667 | 0.975242791 |
| 0.152933333  | 0.1046       | -0.036288889 | 0.975160173 |

|              |              |              |             |
|--------------|--------------|--------------|-------------|
| 0.080033333  | -0.0682      | -0.036311111 | 0.975145153 |
| 0.101766667  | 0.109066667  | -0.036422222 | 0.975070054 |
| -0.056633333 | -0.1578      | -0.036455556 | 0.975047525 |
| 0.0229       | -0.129233333 | -0.036522222 | 0.975002469 |
| 0.124533333  | 0.003266667  | -0.036577778 | 0.974964924 |
| 0.025433333  | -0.063833333 | -0.036577778 | 0.974964924 |
| 0.020233333  | 0.014033333  | -0.036622222 | 0.97493489  |
| -0.0811      | 0.072766667  | -0.036677778 | 0.974897347 |
| -0.070366667 | -0.075766667 | -0.0368      | 0.97481476  |
| 0.131066667  | 0.088366667  | -0.036844444 | 0.974784729 |
| -0.024433333 | 0.018033333  | -0.036888889 | 0.9747547   |
| -0.048433333 | -0.1204      | -0.036955556 | 0.974709658 |
| 0.0925       | 0.0069       | -0.036966667 | 0.974702151 |
| 0.091633333  | -0.003433333 | -0.036977778 | 0.974694644 |
| -0.076233333 | -0.133966667 | -0.037022222 | 0.974664618 |
| -0.033333333 | 0.023866667  | -0.037088889 | 0.97461958  |
| -0.148466667 | -0.049       | -0.037111111 | 0.974604568 |
| -0.112066667 | 5.00E-04     | -0.037111111 | 0.974604568 |
| 0.205333333  | 0.072066667  | -0.037111111 | 0.974604568 |
| 0.100933333  | -0.000933333 | -0.037144444 | 0.97458205  |
| -0.0909      | -0.1572      | -0.037422222 | 0.974394421 |
| 0.081        | -0.0196      | -0.037466667 | 0.974364404 |
| -0.1877      | 0.018033333  | -0.037488889 | 0.974349395 |
| -0.116433333 | -0.0463      | -0.037488889 | 0.974349395 |
| -0.124333333 | -0.026266667 | -0.037588889 | 0.974281861 |
| -0.143033333 | 0.088933333  | -0.0376      | 0.974274357 |
| -0.022866667 | 0.0093       | -0.037633333 | 0.974251847 |
| -0.047433333 | 0.086933333  | -0.037644444 | 0.974244344 |
| -0.061166667 | 0.0292       | -0.037644444 | 0.974244344 |
| -0.0177      | 0.027666667  | -0.037677778 | 0.974221834 |
| 0.049566667  | -0.171433333 | -0.0377      | 0.974206828 |
| -0.147166667 | 0.106266667  | -0.037788889 | 0.974146806 |
| -0.052866667 | -0.246433333 | -0.037911111 | 0.974064282 |
| -0.156666667 | -0.087366667 | -0.037955556 | 0.974034275 |
| -0.003666667 | 0.1493       | -0.038       | 0.974004269 |
| -0.002633333 | 0.096033333  | -0.038088889 | 0.973944259 |
| -0.042766667 | -0.0168      | -0.038155556 | 0.973899254 |
| 0.094766667  | 0.248633333  | -0.038166667 | 0.973891754 |
| 0.129266667  | -0.0391      | -0.038166667 | 0.973891754 |
| -0.0712      | -0.030366667 | -0.038177778 | 0.973884253 |
| -0.1515      | -0.028266667 | -0.038211111 | 0.973861752 |
| -0.094       | -0.0513      | -0.038311111 | 0.973794251 |
| -0.155766667 | -0.079633333 | -0.038333333 | 0.973779252 |
| -0.003233333 | 0.080466667  | -0.038366667 | 0.973756753 |
| -0.131666667 | -0.060733333 | -0.038444444 | 0.973704258 |
| -0.029966667 | 0.044933333  | -0.038455556 | 0.973696759 |
| 0.0072       | -0.0552      | -0.038566667 | 0.973621771 |

|              |              |              |             |
|--------------|--------------|--------------|-------------|
| -0.093166667 | -0.098333333 | -0.038566667 | 0.973621771 |
| 0.1118       | 0.057266667  | -0.0386      | 0.973599276 |
| 0.012133333  | 0.002866667  | -0.038644444 | 0.973569283 |
| -0.008833333 | 0.097066667  | -0.038688889 | 0.973539291 |
| -0.135766667 | -0.114366667 | -0.038688889 | 0.973539291 |
| -0.104333333 | -0.199233333 | -0.038733333 | 0.9735093   |
| -0.1868      | -0.149433333 | -0.0388      | 0.973464316 |
| -0.150733333 | -0.1792      | -0.038811111 | 0.973456818 |
| 0.0467       | -0.130166667 | -0.038844444 | 0.973434327 |
| -0.133666667 | -0.102533333 | -0.038955556 | 0.97335936  |
| 0.076866667  | -0.1477      | -0.038966667 | 0.973351863 |
| -0.097266667 | -0.0274      | -0.039066667 | 0.973284398 |
| -0.006766667 | -0.030066667 | -0.039288889 | 0.973134492 |
| -0.021833333 | 0.0297       | -0.039322222 | 0.973112008 |
| -0.354933333 | -0.167566667 | -0.039377778 | 0.973074536 |
| 0.018666667  | 0.040233333  | -0.039422222 | 0.973044559 |
| -0.0582      | -0.0137      | -0.039466667 | 0.973014584 |
| 1.16E-18     | -0.048033333 | -0.039555556 | 0.972954635 |
| -0.067166667 | -0.017966667 | -0.039555556 | 0.972954635 |
| 0.064266667  | -0.349166667 | -0.039566667 | 0.972947142 |
| 0.031666667  | -0.0017      | -0.039666667 | 0.972879704 |
| -0.074866667 | -0.070333333 | -0.0397      | 0.972857226 |
| -0.029       | 0.0181       | -0.0397      | 0.972857226 |
| -0.148133333 | -0.407066667 | -0.039788889 | 0.972797287 |
| 0.013833333  | 4.63E-18     | -0.039877778 | 0.972737352 |
| 0.0268       | 0.034233333  | -0.039888889 | 0.972729861 |
| -0.070933333 | 0.070066667  | -0.039944444 | 0.972692403 |
| 0.0157       | 0.093466667  | -0.039977778 | 0.97266993  |
| -0.065566667 | -0.162966667 | -0.039988889 | 0.972662438 |
| -0.0126      | -0.057666667 | -0.040033333 | 0.972632475 |
| 0.461        | 0.388666667  | -0.040044444 | 0.972624984 |
| -0.079366667 | -0.162266667 | -0.040055556 | 0.972617493 |
| -0.0411      | -0.063466667 | -0.040133333 | 0.972565059 |
| 0.146866667  | 0.088033333  | -0.040133333 | 0.972565059 |
| 0.053633333  | -0.205       | -0.040133333 | 0.972565059 |
| 0.0513       | -0.019866667 | -0.040188889 | 0.972527608 |
| -0.002966667 | -0.0798      | -0.040233333 | 0.972497648 |
| -0.0406      | -0.0251      | -0.040266667 | 0.972475179 |
| -0.194333333 | -0.137133333 | -0.040355556 | 0.972415264 |
| -0.060533333 | 0.015566667  | -0.040366667 | 0.972407775 |
| -0.1004      | -0.2332      | -0.040411111 | 0.972377819 |
| -0.058133333 | -0.031933333 | -0.040455556 | 0.972347864 |
| -0.0102      | 0.027733333  | -0.040511111 | 0.972310421 |
| 0.0425       | 0.135466667  | -0.040666667 | 0.972205589 |
| -0.1306      | -0.11        | -0.040666667 | 0.972205589 |
| -0.0282      | 0.0329       | -0.040711111 | 0.972175639 |
| 0.015        | 0.3204       | -0.040755556 | 0.97214569  |



|              |              |              |             |
|--------------|--------------|--------------|-------------|
| -0.041666667 | 0.050033333  | -0.040822222 | 0.972100769 |
| 0.005733333  | -0.022833333 | -0.040844444 | 0.972085795 |
| -0.1009      | 0.008966667  | -0.040855556 | 0.972078309 |
| -0.089533333 | -0.021033333 | -0.041111111 | 0.971906132 |
| -0.070166667 | 0.059133333  | -0.041155556 | 0.971876192 |
| -0.2828      | -0.145566667 | -0.041166667 | 0.971868707 |
| -0.021533333 | -0.1156      | -0.041244444 | 0.971816313 |
| -0.1387      | -0.1244      | -0.041322222 | 0.971763923 |
| -0.134133333 | -0.156533333 | -0.041344444 | 0.971748955 |
| -0.0583      | 0.007333333  | -0.041555556 | 0.971606768 |
| 0.117        | 0.004233333  | -0.041633333 | 0.971554389 |
| -2.89E-19    | -0.1127      | -0.041633333 | 0.971554389 |
| -0.0661      | -0.052733333 | -0.041733333 | 0.971487048 |
| 0.1803       | -0.711966667 | -0.041811111 | 0.971434675 |
| 0.097166667  | 0.050666667  | -0.041833333 | 0.971419712 |
| -0.1678      | -0.148033333 | -0.041833333 | 0.971419712 |
| -0.155333333 | 0.0706       | -0.041833333 | 0.971419712 |
| -0.240366667 | -0.165166667 | -0.041866667 | 0.971397268 |
| 0.1355       | 0.048333333  | -0.041966667 | 0.971329938 |
| 0.0162       | -0.034733333 | -0.042011111 | 0.971300015 |
| 0.0129       | 0.146033333  | -0.042033333 | 0.971285054 |
| -0.123566667 | -0.1185      | -0.042044444 | 0.971277573 |
| 0.092833333  | 0.1127       | -0.042122222 | 0.971225212 |
| 0.167033333  | -0.054833333 | -0.0422      | 0.971172853 |
| -0.008333333 | -0.036433333 | -0.042222222 | 0.971157894 |
| -0.147       | 0.0755       | -0.042222222 | 0.971157894 |
| -0.107866667 | -0.164166667 | -0.042277778 | 0.971120497 |
| -0.2577      | -0.0576      | -0.042422222 | 0.971023272 |
| 0.017066667  | -0.065966667 | -0.042511111 | 0.970963446 |
| 0.008333333  | 0.120966667  | -0.042511111 | 0.970963446 |
| -0.0253      | 0.253433333  | -0.042511111 | 0.970963446 |
| 0.0129       | 0.025033333  | -0.042522222 | 0.970955968 |
| -0.158466667 | -0.083466667 | -0.042522222 | 0.970955968 |
| -0.026866667 | 0.004833333  | -0.0426      | 0.970903624 |
| 0.134233333  | 0.235066667  | -0.042666667 | 0.97085876  |
| -0.181733333 | -0.080433333 | -0.042711111 | 0.970828852 |
| -0.074366667 | -0.116533333 | -0.042722222 | 0.970821375 |
| 0.053133333  | -0.429533333 | -0.042744444 | 0.970806421 |
| -0.003333333 | -0.0667      | -0.042755556 | 0.970798944 |
| -0.0827      | -0.165266667 | -0.042877778 | 0.970716703 |
| 0.0616       | -0.021933333 | -0.0429      | 0.970701751 |
| 0.0391       | -0.0296      | -0.042966667 | 0.970656896 |
| -0.213133333 | -0.116833333 | -0.043033333 | 0.970612044 |
| 0.023966667  | 0.0176       | -0.043077778 | 0.970582143 |
| -0.171533333 | -0.057366667 | -0.043111111 | 0.970559718 |
| 0.019833333  | -0.098166667 | -0.043266667 | 0.970455075 |
| -0.174033333 | 0.021233333  | -0.043388889 | 0.970372863 |

|              |              |              |             |
|--------------|--------------|--------------|-------------|
| 0.038533333  | -0.101066667 | -0.043422222 | 0.970350443 |
| -0.096566667 | -0.1835      | -0.043611111 | 0.970223406 |
| 0.064433333  | -0.0664      | -0.043611111 | 0.970223406 |
| -0.155933333 | -0.089933333 | -0.043733333 | 0.970141214 |
| -0.0603      | 0.096633333  | -0.043833333 | 0.970073971 |
| 0.1279       | 0.0482       | -0.043966667 | 0.969984321 |
| 0.212733333  | -0.108866667 | -0.044088889 | 0.96990215  |
| -0.2668      | 0.113166667  | -0.044211111 | 0.969819985 |
| 0.252533333  | 0.239733333  | -0.044211111 | 0.969819985 |
| -0.1563      | 0.021566667  | -0.044277778 | 0.969775171 |
| -0.108533333 | 0.010833333  | -0.044344444 | 0.969730359 |
| -0.077133333 | -0.0194      | -0.044366667 | 0.969715422 |
| 0.009266667  | -0.064366667 | -0.044422222 | 0.969678081 |
| 0.0013       | -0.081166667 | -0.044433333 | 0.969670613 |
| -0.052366667 | -0.178733333 | -0.044533333 | 0.969603403 |
| -0.1051      | 0.015133333  | -0.044622222 | 0.969543664 |
| 0.016033333  | 0.106933333  | -0.0447      | 0.969491396 |
| -0.0918      | 0.030966667  | -0.044722222 | 0.969476463 |
| -0.137366667 | -0.055633333 | -0.044733333 | 0.969468996 |
| 0.0434       | -0.095633333 | -0.044755556 | 0.969454063 |
| 0.035533333  | -0.017866667 | -0.044811111 | 0.969416732 |
| 0.0024       | 0.2467       | -0.044944444 | 0.969327143 |
| -0.031433333 | 0.007333333  | -0.044966667 | 0.969312213 |
| 0.0514       | -0.085533333 | -0.044966667 | 0.969312213 |
| -0.007933333 | -0.138366667 | -0.045077778 | 0.969237563 |
| 0.0309       | -0.040766667 | -0.045077778 | 0.969237563 |
| 0.084466667  | 0.114533333  | -0.0451      | 0.969222633 |
| 0.0579       | 0.070266667  | -0.045122222 | 0.969207704 |
| 0.026733333  | -0.118033333 | -0.045133333 | 0.96920024  |
| -0.0097      | 0.162666667  | -0.045188889 | 0.969162918 |
| -0.004333333 | 0.003833333  | -0.045188889 | 0.969162918 |
| -0.1729      | -0.249033333 | -0.045288889 | 0.969095743 |
| -0.086866667 | 0.012066667  | -0.045355556 | 0.969050963 |
| 0.1157       | -0.188433333 | -0.045433333 | 0.968998721 |
| -0.0148      | -0.172566667 | -0.045555556 | 0.968916633 |
| 0.349066667  | -0.353566667 | -0.0456      | 0.968886784 |
| -0.086466667 | -0.1824      | -0.045622222 | 0.968871861 |
| -0.074933333 | -0.104633333 | -0.045622222 | 0.968871861 |
| 0.047466667  | 0.017366667  | -0.045688889 | 0.96882709  |
| 0.0448       | 0.004166667  | -0.045744444 | 0.968789783 |
| -0.060933333 | -0.0794      | -0.045844444 | 0.968722634 |
| 0.012433333  | -0.005333333 | -0.045922222 | 0.96867041  |
| -0.108933333 | -0.2596      | -0.046033333 | 0.96859581  |
| -0.001266667 | 0.089766667  | -0.046133333 | 0.968528674 |
| -0.0594      | 0.009566667  | -0.046133333 | 0.968528674 |
| -0.078266667 | -0.313666667 | -0.046177778 | 0.968498837 |
| -0.146766667 | -0.2058      | -0.046255556 | 0.968446626 |

|              |              |              |             |
|--------------|--------------|--------------|-------------|
| 0.0095       | -0.073133333 | -0.0463      | 0.968416792 |
| 0.0197       | 0.0387       | -0.046311111 | 0.968409333 |
| 0.546933333  | -0.356833333 | -0.046333333 | 0.968394417 |
| -0.165133333 | 0.0162       | -0.046344444 | 0.968386959 |
| -0.2586      | -0.003266667 | -0.046366667 | 0.968372042 |
| -0.052333333 | -0.087       | -0.046388889 | 0.968357126 |
| -0.0308      | -0.087333333 | -0.046544444 | 0.968252721 |
| 0.106333333  | 0.022766667  | -0.046611111 | 0.968207979 |
| -0.050933333 | -0.1049      | -0.046677778 | 0.96816324  |
| -0.008966667 | 0.0655       | -0.046688889 | 0.968155783 |
| -0.235733333 | -0.1669      | -0.046766667 | 0.96810359  |
| -0.0697      | -0.2038      | -0.046777778 | 0.968096134 |
| -0.0912      | 0.043033333  | -0.046788889 | 0.968088678 |
| 0.091933333  | 0.080666667  | -0.046866667 | 0.968036488 |
| -0.055533333 | -0.1396      | -0.046922222 | 0.967999212 |
| 0.0314       | 0.053966667  | -0.046955556 | 0.967976846 |
| 0.214766667  | 0.212566667  | -0.047088889 | 0.967887391 |
| -0.011466667 | 0.068033333  | -0.047222222 | 0.967797943 |
| -0.2052      | -0.0088      | -0.047233333 | 0.967790489 |
| -0.038233333 | -0.033733333 | -0.047244444 | 0.967783036 |
| -0.173633333 | 0.019633333  | -0.047266667 | 0.967768129 |
| -0.2178      | -0.188166667 | -0.047333333 | 0.967723409 |
| 0.0556       | -0.177566667 | -0.047366667 | 0.967701051 |
| -0.2331      | -0.0626      | -0.047388889 | 0.967686145 |
| -0.017966667 | -0.220466667 | -0.047522222 | 0.967596716 |
| -0.021333333 | 0.019        | -0.0477      | 0.96747749  |
| 0.011766667  | -0.0783      | -0.047777778 | 0.967425333 |
| -0.0308      | -0.041966667 | -0.047966667 | 0.967298679 |
| -0.0139      | 0.0139       | -0.048044444 | 0.967246532 |
| -0.015066667 | 0.2984       | -0.048055556 | 0.967239082 |
| 0.0184       | -0.0814      | -0.048222222 | 0.967127349 |
| -0.0384      | -0.108533333 | -0.048244444 | 0.967112452 |
| -0.0262      | -0.0175      | -0.048277778 | 0.967090107 |
| 0.039266667  | 0.059666667  | -0.048344444 | 0.967045419 |
| -0.034066667 | 0.049933333  | -0.048344444 | 0.967045419 |
| -0.012166667 | -0.1145      | -0.048411111 | 0.967000733 |
| 0.096566667  | -0.033       | -0.048633333 | 0.966851795 |
| 0.0021       | 0.0348       | -0.0487      | 0.966807118 |
| -0.153033333 | -0.126       | -0.048844444 | 0.966710325 |
| 0.040966667  | 0.095766667  | -0.048855556 | 0.96670288  |
| -0.134933333 | -0.0533      | -0.048866667 | 0.966695435 |
| 0.067466667  | 0.059633333  | -0.048922222 | 0.96665821  |
| -0.094833333 | -0.0174      | -0.049044444 | 0.96657632  |
| -0.198733333 | -0.1133      | -0.049111111 | 0.966531655 |
| 0.170933333  | -0.077366667 | -0.049133333 | 0.966516768 |
| 0.028366667  | 0.042033333  | -0.049177778 | 0.966486993 |
| -0.159466667 | -0.072933333 | -0.0492      | 0.966472106 |

|              |              |              |             |
|--------------|--------------|--------------|-------------|
| -0.144433333 | -0.3037      | -0.049333333 | 0.966382789 |
| 0.1094       | 0.289933333  | -0.049377778 | 0.966353019 |
| -0.141833333 | 0.059066667  | -0.049455556 | 0.966300923 |
| -0.148366667 | -0.0953      | -0.049533333 | 0.96624883  |
| 0.118366667  | 0.040033333  | -0.049566667 | 0.966226505 |
| -0.019133333 | -0.0565      | -0.049633333 | 0.966181857 |
| -0.0886      | -0.0819      | -0.049855556 | 0.966033045 |
| -0.0368      | -0.054166667 | -0.049922222 | 0.965988405 |
| 0.083766667  | -0.017966667 | -0.049966667 | 0.965958647 |
| -0.1085      | -0.1651      | -0.049977778 | 0.965951208 |
| -0.111433333 | -0.1017      | -0.049977778 | 0.965951208 |
| 3.90E-18     | -0.157       | -0.049988889 | 0.965943768 |
| 0.489266667  | 0.060933333  | -0.05        | 0.965936329 |
| -0.179933333 | 0.080166667  | -0.0502      | 0.965802431 |
| 0.015133333  | -0.2018      | -0.0503      | 0.965735489 |
| -0.1425      | -0.1571      | -0.050322222 | 0.965720614 |
| -0.134133333 | -0.0889      | -0.050366667 | 0.965690864 |
| 0.111666667  | 0.0877       | -0.0505      | 0.965601619 |
| 0.0896       | 0.031466667  | -0.050566667 | 0.965557    |
| 0.0743       | 0.010233333  | -0.050666667 | 0.965490075 |
| -0.197733333 | -0.011366667 | -0.050733333 | 0.965445461 |
| -0.1656      | 0.101633333  | -0.050811111 | 0.965393413 |
| -0.0373      | 0.001633333  | -0.050888889 | 0.965341369 |
| -0.030666667 | 0.1199       | -0.050966667 | 0.965289328 |
| 0.147966667  | -0.025366667 | -0.051066667 | 0.965222421 |
| 0.085433333  | 0.049166667  | -0.051077778 | 0.965214987 |
| -0.2477      | -0.044133333 | -0.0511      | 0.96520012  |
| -0.148566667 | -0.058566667 | -0.051111111 | 0.965192686 |
| -0.0614      | -0.350433333 | -0.051122222 | 0.965185253 |
| -0.063433333 | 0.052566667  | -0.051166667 | 0.965155519 |
| 0.480966667  | 0.0118       | -0.051177778 | 0.965148086 |
| -0.081333333 | -0.1114      | -0.0512      | 0.96513322  |
| 0.276366667  | 0.214033333  | -0.051222222 | 0.965118354 |
| 0.437666667  | 0.022566667  | -0.051244444 | 0.965103488 |
| 0.081566667  | -0.095766667 | -0.051255556 | 0.965096055 |
| -0.004966667 | -0.156466667 | -0.051277778 | 0.965081189 |
| -0.096233333 | -0.158466667 | -0.0513      | 0.965066324 |
| -0.0256      | -0.107133333 | -0.051355556 | 0.965029162 |
| 0.0649       | 0.0157       | -0.051433333 | 0.964977137 |
| -0.1412      | 0.125966667  | -0.051433333 | 0.964977137 |
| -0.029266667 | 0.030466667  | -0.051444444 | 0.964969705 |
| 0.000933333  | 0.068433333  | -0.051511111 | 0.964925115 |
| -0.1271      | -0.294266667 | -0.051622222 | 0.964850803 |
| 0.006866667  | 0.063433333  | -0.051822222 | 0.964717056 |
| 0.0081       | -0.1448      | -0.051833333 | 0.964709626 |
| -0.021266667 | -0.037533333 | -0.051877778 | 0.964679907 |
| -0.059266667 | -0.0365      | -0.051944444 | 0.96463533  |

|              |              |              |             |
|--------------|--------------|--------------|-------------|
| 0.1117       | -0.010266667 | -0.052111111 | 0.964523898 |
| 0.001033333  | -0.164866667 | -0.052111111 | 0.964523898 |
| -0.155666667 | -0.105233333 | -0.052177778 | 0.964479328 |
| -0.039133333 | 0.002133333  | -0.052233333 | 0.964442189 |
| -0.204266667 | 0.0938       | -0.052255556 | 0.964427333 |
| 0.008066667  | 0.055666667  | -0.052266667 | 0.964419905 |
| -0.1001      | -0.1674      | -0.052277778 | 0.964412478 |
| 0.0773       | 0.087266667  | -0.052288889 | 0.96440505  |
| 0.015166667  | -0.0276      | -0.052288889 | 0.96440505  |
| -0.061366667 | 0.010133333  | -0.052333333 | 0.964375341 |
| -0.011266667 | -0.013733333 | -0.052377778 | 0.964345632 |
| -0.099866667 | 0.010966667  | -0.0524      | 0.964330778 |
| -0.089266667 | -0.019866667 | -0.0525      | 0.964263938 |
| -0.093       | -0.148366667 | -0.052611111 | 0.964189677 |
| 0.0603       | -0.141566667 | -0.052677778 | 0.964145123 |
| -0.052933333 | -0.009533333 | -0.052722222 | 0.964115422 |
| -0.0426      | -0.064033333 | -0.052855556 | 0.964026322 |
| 0.057866667  | -0.018       | -0.052866667 | 0.964018898 |
| 0.0382       | 0.0212       | -0.052911111 | 0.9639892   |
| -0.115366667 | -0.157433333 | -0.052944444 | 0.963966928 |
| -0.042966667 | -0.031266667 | -0.052988889 | 0.963937232 |
| -0.130066667 | -0.001366667 | -0.053033333 | 0.963907536 |
| 0.0372       | 0.0274       | -0.053044444 | 0.963900113 |
| -0.035066667 | 0.036166667  | -0.053144444 | 0.963833303 |
| -0.152966667 | -0.110033333 | -0.053388889 | 0.963670009 |
| -0.127233333 | -0.0406      | -0.053433333 | 0.963640322 |
| -0.144766667 | -0.211933333 | -0.053477778 | 0.963610636 |
| 0.0056       | -0.186133333 | -0.053555556 | 0.963558687 |
| 0.022733333  | -0.020533333 | -0.053644444 | 0.963499321 |
| -0.142466667 | 0.207066667  | -0.053677778 | 0.96347706  |
| -0.0679      | -0.0078      | -0.053755556 | 0.963425119 |
| 0.317166667  | 0.4131       | -0.0538      | 0.96339544  |
| -0.019766667 | -0.196166667 | -0.053822222 | 0.9633806   |
| 0.052966667  | -0.069333333 | -0.053855556 | 0.963358342 |
| 0.1071       | 0.0719       | -0.053877778 | 0.963343503 |
| -0.012766667 | -0.035333333 | -0.053888889 | 0.963336084 |
| -0.054433333 | -0.005566667 | -0.053922222 | 0.963313826 |
| -0.0282      | -0.1029      | -0.053933333 | 0.963306407 |
| -0.077133333 | 0.086433333  | -0.054055556 | 0.963224801 |
| 0.0535       | 0.1334       | -0.054066667 | 0.963217383 |
| -0.053833333 | -0.1986      | -0.054166667 | 0.96315062  |
| -0.1284      | 0.0844       | -0.0542      | 0.963128367 |
| -0.094333333 | -0.052       | -0.054222222 | 0.963113532 |
| -0.022566667 | -0.004866667 | -0.054366667 | 0.963017108 |
| -0.112366667 | -0.0685      | -0.054377778 | 0.963009692 |
| 0.072166667  | -0.0363      | -0.054422222 | 0.962980025 |
| 0.073066667  | 0.0281       | -0.054433333 | 0.962972608 |

|              |              |              |             |
|--------------|--------------|--------------|-------------|
| 0.0011       | 0.076633333  | -0.054455556 | 0.962957776 |
| -0.099766667 | -0.099166667 | -0.054477778 | 0.962942943 |
| 0.098566667  | -0.122266667 | -0.054566667 | 0.962883615 |
| 0.0497       | -0.055966667 | -0.054666667 | 0.962816875 |
| -0.204333333 | -0.1918      | -0.054688889 | 0.962802045 |
| -0.002033333 | 0.146733333  | -0.054688889 | 0.962802045 |
| -0.044733333 | -0.0782      | -0.054755556 | 0.962757555 |
| -0.085133333 | -0.054033333 | -0.054755556 | 0.962757555 |
| 0.0418       | 0.119666667  | -0.054822222 | 0.962713067 |
| 0.097133333  | 0.088733333  | -0.054866667 | 0.96268341  |
| -0.032233333 | 0.147666667  | -0.054933333 | 0.962638925 |
| -0.0288      | 0.023033333  | -0.055022222 | 0.962579616 |
| -0.2529      | -0.081366667 | -0.055044444 | 0.962564789 |
| -0.147233333 | -0.2317      | -0.055122222 | 0.962512897 |
| -0.146266667 | 0.051266667  | -0.055133333 | 0.962505485 |
| -0.0524      | -0.068866667 | -0.0552      | 0.962461008 |
| -0.142733333 | 0.026666667  | -0.055233333 | 0.962438771 |
| -0.217633333 | -0.1908      | -0.055244444 | 0.962431359 |
| -0.0706      | 0.099433333  | -0.055388889 | 0.962335004 |
| -0.114233333 | -0.138133333 | -0.0554      | 0.962327592 |
| 0.051533333  | -0.034033333 | -0.0554      | 0.962327592 |
| -0.0931      | -0.030366667 | -0.055477778 | 0.962275713 |
| 0.115866667  | 0.153966667  | -0.055544444 | 0.962231248 |
| 0.016433333  | 0.037866667  | -0.055566667 | 0.962216426 |
| -0.079366667 | -0.068033333 | -0.055622222 | 0.962179374 |
| -0.007933333 | 0.0593       | -0.055666667 | 0.962149733 |
| -0.100933333 | -0.1814      | -0.055744444 | 0.962097863 |
| 0.088133333  | -0.006666667 | -0.055788889 | 0.962068225 |
| -0.2478      | -0.219566667 | -0.055888889 | 0.962001542 |
| -0.1014      | -0.275233333 | -0.0559      | 0.961994133 |
| -0.022866667 | 0.049966667  | -0.055933333 | 0.961971906 |
| 0.0213       | -0.163766667 | -0.055977778 | 0.961942272 |
| -0.107666667 | -0.030166667 | -0.055988889 | 0.961934863 |
| -0.1253      | -0.1735      | -0.056088889 | 0.961868189 |
| -0.087033333 | -0.246366667 | -0.0561      | 0.961860781 |
| -0.0249      | 0.044933333  | -0.056111111 | 0.961853373 |
| -0.149333333 | -0.028033333 | -0.0563      | 0.961727448 |
| 0.0096       | 0.042966667  | -0.056344444 | 0.961697821 |
| -0.1176      | -0.041933333 | -0.056388889 | 0.961668195 |
| -0.007333333 | 0.032266667  | -0.056433333 | 0.96163857  |
| 0.024466667  | -0.0191      | -0.056522222 | 0.961579322 |
| -0.1096      | -0.024333333 | -0.056633333 | 0.961505268 |
| -0.008033333 | -0.1263      | -0.056666667 | 0.961483052 |
| -0.005833333 | 0.011833333  | -0.056788889 | 0.961401601 |
| -0.119366667 | 0.021966667  | -0.0568      | 0.961394197 |
| -0.0387      | 0.0139       | -0.056833333 | 0.961371984 |
| 0.059533333  | -0.039633333 | -0.056833333 | 0.961371984 |

|              |              |              |             |
|--------------|--------------|--------------|-------------|
| -0.0655      | -0.124       | -0.056866667 | 0.961349772 |
| -0.162833333 | -0.083166667 | -0.056888889 | 0.961334964 |
| 0.198466667  | 0.359866667  | -0.056922222 | 0.961312753 |
| -0.106       | -0.049266667 | -0.056922222 | 0.961312753 |
| -0.0776      | 0.019033333  | -0.056955556 | 0.961290542 |
| 0.081766667  | 0.021933333  | -0.057155556 | 0.961157288 |
| -0.010666667 | -0.0938      | -0.057244444 | 0.96109807  |
| -0.1328      | -0.163833333 | -0.057277778 | 0.961075864 |
| 0.009733333  | 0.130433333  | -0.057377778 | 0.96100925  |
| 0.022133333  | -0.096133333 | -0.057444444 | 0.960964843 |
| -0.007166667 | -0.022033333 | -0.057466667 | 0.960950041 |
| -0.0488      | 0.008666667  | -0.057544444 | 0.960898236 |
| -0.0821      | -0.140733333 | -0.057844444 | 0.960698444 |
| 0.172466667  | 0.044266667  | -0.057911111 | 0.960654051 |
| -0.064       | -0.074166667 | -0.057944444 | 0.960631855 |
| -0.0203      | 0.033466667  | -0.058033333 | 0.96057267  |
| 0.071133333  | 0.021066667  | -0.058044444 | 0.960565272 |
| -0.097733333 | -0.0163      | -0.058111111 | 0.960520885 |
| 0.136466667  | -0.071466667 | -0.058122222 | 0.960513488 |
| -0.169166667 | -0.137366667 | -0.058233333 | 0.960439515 |
| -0.034133333 | -0.144       | -0.0583      | 0.960395135 |
| -0.1193      | -0.1744      | -0.058311111 | 0.960387738 |
| -0.0774      | 0.041566667  | -0.058366667 | 0.960350756 |
| -0.1163      | -0.038233333 | -0.058366667 | 0.960350756 |
| -0.115066667 | 0.0389       | -0.0584      | 0.960328567 |
| -0.265966667 | 0.029333333  | -0.058455556 | 0.960291588 |
| -0.113833333 | -0.130966667 | -0.058666667 | 0.960151077 |
| -0.093733333 | -0.099566667 | -0.058811111 | 0.960054951 |
| -0.0257      | -0.052933333 | -0.058844444 | 0.960032769 |
| -0.053233333 | -0.0355      | -0.058911111 | 0.959988407 |
| -0.091433333 | -0.182933333 | -0.058922222 | 0.959981014 |
| 0.017833333  | -0.068866667 | -0.058955556 | 0.959958834 |
| -0.042366667 | -0.055966667 | -0.058988889 | 0.959936654 |
| -0.0169      | -0.089       | -0.059022222 | 0.959914475 |
| 0.041233333  | 0.046666667  | -0.059088889 | 0.959870119 |
| -0.0812      | -0.015666667 | -0.059144444 | 0.959833157 |
| 0.2812       | 0.093266667  | -0.059233333 | 0.95977402  |
| -0.177033333 | -0.058933333 | -0.059244444 | 0.959766628 |
| 0.002266667  | -0.539333333 | -0.059255556 | 0.959759237 |
| -0.083166667 | -0.200866667 | -0.059322222 | 0.959714887 |
| 0.006666667  | 0.140166667  | -0.0595      | 0.959596633 |
| -0.034733333 | -0.164533333 | -0.059522222 | 0.959581852 |
| -0.1545      | 0.0068       | -0.059555556 | 0.959559681 |
| -0.012633333 | -0.034566667 | -0.059611111 | 0.959522731 |
| 0.004266667  | 0.030633333  | -0.059755556 | 0.959426667 |
| -0.001633333 | 0.078933333  | -0.059844444 | 0.959367556 |
| -0.0709      | -0.1284      | -0.059888889 | 0.959338001 |

|              |              |              |             |
|--------------|--------------|--------------|-------------|
| 0.163066667  | 0.0325       | -0.059944444 | 0.95930106  |
| 0.2193       | 0.049766667  | -0.059966667 | 0.959286283 |
| 0.027866667  | -0.479466667 | -0.059977778 | 0.959278895 |
| -0.0062      | 0.019733333  | -0.060022222 | 0.959249344 |
| 0.093        | -0.0703      | -0.060155556 | 0.959160694 |
| -0.045466667 | -0.0119      | -0.060166667 | 0.959153307 |
| -0.0664      | -0.090933333 | -0.060222222 | 0.959116373 |
| -0.163066667 | -0.113666667 | -0.060233333 | 0.959108986 |
| 0.040566667  | 0.0444       | -0.0603      | 0.959064667 |
| 0.0709       | -0.096       | -0.060366667 | 0.95902035  |
| 0.029366667  | -0.0977      | -0.060377778 | 0.959012964 |
| 0.014533333  | -0.083966667 | -0.060411111 | 0.958990806 |
| -0.163933333 | -0.0721      | -0.060422222 | 0.95898342  |
| 0.083366667  | 0.1588       | -0.060433333 | 0.958976034 |
| 0.001633333  | -0.1512      | -0.060444444 | 0.958968649 |
| 0.036866667  | 0.027        | -0.060455556 | 0.958961263 |
| -0.0144      | 0.068566667  | -0.060577778 | 0.958880025 |
| -0.2386      | -0.0978      | -0.060644444 | 0.958835717 |
| -0.048733333 | 0.0398       | -0.060666667 | 0.958820948 |
| 0.111033333  | -0.044733333 | -0.060711111 | 0.95879141  |
| -0.078       | 0.073966667  | -0.060777778 | 0.958747106 |
| 0.055766667  | -0.0138      | -0.060833333 | 0.958710187 |
| 0.0561       | -0.0582      | -0.060833333 | 0.958710187 |
| -0.166466667 | -0.203966667 | -0.060911111 | 0.958658503 |
| 0.0185       | -0.232066667 | -0.060966667 | 0.958621587 |
| -0.0748      | -0.160933333 | -0.060977778 | 0.958614204 |
| -0.152433333 | -0.0804      | -0.061044444 | 0.958569908 |
| 0.123766667  | -0.228933333 | -0.061066667 | 0.958555143 |
| -0.096166667 | 0.0045       | -0.061188889 | 0.958473939 |
| 0.029833333  | -0.063666667 | -0.061211111 | 0.958459176 |
| -0.0684      | -0.221333333 | -0.0613      | 0.958400124 |
| -0.048066667 | -0.1991      | -0.061422222 | 0.958318934 |
| 0.138        | 0.035733333  | -0.061422222 | 0.958318934 |
| 0.184333333  | -0.677066667 | -0.0615      | 0.958267271 |
| -0.084933333 | -0.016333333 | -0.061633333 | 0.958178712 |
| -0.036733333 | -0.016966667 | -0.061677778 | 0.958149194 |
| -0.0479      | -0.005133333 | -0.061822222 | 0.958053268 |
| -0.126966667 | 0.019866667  | -0.061844444 | 0.958038511 |
| 0.053033333  | -0.046066667 | -0.062055556 | 0.957898331 |
| 0.000366667  | -0.0077      | -0.062144444 | 0.957839313 |
| -0.085066667 | 0.053466667  | -0.062288889 | 0.957743418 |
| -0.0168      | -0.044266667 | -0.062322222 | 0.95772129  |
| 0.0016       | -0.1545      | -0.062322222 | 0.95772129  |
| 0.0465       | -0.092633333 | -0.062366667 | 0.957691786 |
| 0.003533333  | -0.017633333 | -0.062377778 | 0.95768441  |
| -0.091533333 | -0.1385      | -0.062433333 | 0.957647532 |
| 0.0382       | 0.0225       | -0.0625      | 0.957603281 |



|              |              |              |             |
|--------------|--------------|--------------|-------------|
| 0.085033333  | -0.034366667 | -0.062566667 | 0.957559031 |
| 0.2841       | -0.155566667 | -0.0626      | 0.957536907 |
| -0.077833333 | -0.034133333 | -0.062622222 | 0.957522158 |
| -0.138833333 | 0.099766667  | -0.062766667 | 0.957426294 |
| -0.1207      | -0.132466667 | -0.0629      | 0.957337813 |
| -0.0719      | -0.065366667 | -0.062966667 | 0.957293576 |
| -0.087666667 | -0.0954      | -0.062988889 | 0.957278831 |
| -0.013233333 | -0.208533333 | -0.063033333 | 0.957249341 |
| -0.001833333 | 0.095333333  | -0.063333333 | 0.957050307 |
| -0.135066667 | -0.1835      | -0.063388889 | 0.957013454 |
| -0.126033333 | 0.145633333  | -0.063444444 | 0.956976601 |
| -0.0321      | 0.0119       | -0.063455556 | 0.956969231 |
| 0.120266667  | -0.123466667 | -0.063633333 | 0.956851315 |
| -0.100966667 | -0.054866667 | -0.063633333 | 0.956851315 |
| 0.025        | -0.018966667 | -0.063633333 | 0.956851315 |
| 0.0725       | 0.114066667  | -0.063666667 | 0.956829207 |
| -0.176933333 | -0.204933333 | -0.063766667 | 0.956762887 |
| 0.043166667  | 0.339233333  | -0.063822222 | 0.956726045 |
| 0.125133333  | -0.029266667 | -0.063911111 | 0.956667099 |
| 0.0002       | -0.0784      | -0.063922222 | 0.956659732 |
| -0.073366667 | 0.083966667  | -0.063944444 | 0.956644996 |
| 0.0972       | 0.082733333  | -0.064066667 | 0.956563954 |
| -0.073366667 | -0.0437      | -0.064077778 | 0.956556587 |
| -0.163266667 | 0.113        | -0.064077778 | 0.956556587 |
| 0.008133333  | 0.062166667  | -0.064088889 | 0.95654922  |
| -0.018       | -0.0648      | -0.064177778 | 0.956490286 |
| -0.001866667 | -0.112433333 | -0.064444444 | 0.956313506 |
| -0.121033333 | 0.0154       | -0.064644444 | 0.956180942 |
| -0.182666667 | -0.102533333 | -0.064666667 | 0.956166213 |
| 0.0622       | -0.0148      | -0.064688889 | 0.956151485 |
| 0.146333333  | 0.045933333  | -0.064788889 | 0.956085212 |
| -0.032266667 | 0.098633333  | -0.064822222 | 0.956063122 |
| -0.0703      | -0.0652      | -0.064833333 | 0.956055759 |
| -0.000966667 | -0.056033333 | -0.064833333 | 0.956055759 |
| 0.038666667  | -0.039       | -0.064877778 | 0.956026307 |
| 0.131366667  | 0.269833333  | -0.064877778 | 0.956026307 |
| 0.029633333  | 0.016733333  | -0.064933333 | 0.955989493 |
| 0.145033333  | -0.0737      | -0.064966667 | 0.955967405 |
| 0.024666667  | 0.023766667  | -0.065       | 0.955945318 |
| -0.049433333 | 0.069233333  | -0.065022222 | 0.955930593 |
| -0.0165      | -0.0037      | -0.065111111 | 0.955871697 |
| -0.057533333 | -0.027366667 | -0.065222222 | 0.955798082 |
| -0.0564      | -0.031766667 | -0.065244444 | 0.95578336  |
| -0.195833333 | -0.019066667 | -0.065311111 | 0.955739194 |
| -0.273066667 | 0.084833333  | -0.0654      | 0.95568031  |
| -0.054333333 | -0.037533333 | -0.065433333 | 0.955658229 |
| -0.069533333 | -0.0103      | -0.065566667 | 0.955569912 |

|              |              |              |             |
|--------------|--------------|--------------|-------------|
| 0.072833333  | 0.0362       | -0.065666667 | 0.955503679 |
| 0.0468       | 0.1148       | -0.065688889 | 0.955488961 |
| -0.009266667 | 0.0072       | -0.0659      | 0.955349154 |
| -0.051833333 | 0.001866667  | -0.066044444 | 0.955253508 |
| 0.017766667  | -0.079966667 | -0.0662      | 0.955150515 |
| 0.0625       | -0.0103      | -0.066244444 | 0.955121091 |
| -0.093933333 | 0.1115       | -0.066266667 | 0.955106379 |
| -0.187       | -0.0342      | -0.0663      | 0.955084312 |
| -0.124533333 | -0.041366667 | -0.066311111 | 0.955076956 |
| -0.034366667 | -0.054933333 | -0.066388889 | 0.955025468 |
| -0.1612      | 0.008133333  | -0.066555556 | 0.954915145 |
| -0.045566667 | 0.027833333  | -0.066577778 | 0.954900436 |
| 0.0029       | -0.0447      | -0.066644444 | 0.954856312 |
| -0.154333333 | 0.0191       | -0.066655556 | 0.954848958 |
| -0.026833333 | -0.065533333 | -0.0667      | 0.954819543 |
| -0.147066667 | -0.159133333 | -0.066822222 | 0.954738656 |
| 0.114166667  | -0.1404      | -0.066966667 | 0.954643071 |
| 0.0483       | 0.0255       | -0.067022222 | 0.95460631  |
| 0.0021       | -0.0434      | -0.067111111 | 0.954547496 |
| -0.1237      | 0.0002       | -0.067166667 | 0.954510738 |
| 0.038933333  | -0.029566667 | -0.067166667 | 0.954510738 |
| 0.0331       | 0.054433333  | -0.067288889 | 0.954429878 |
| 0.035133333  | -0.068133333 | -0.067288889 | 0.954429878 |
| -0.289666667 | -0.110666667 | -0.067411111 | 0.954349024 |
| 0.021466667  | 0.143733333  | -0.067444444 | 0.954326974 |
| -0.0161      | 0.0953       | -0.067455556 | 0.954319624 |
| -0.124266667 | -0.106566667 | -0.067588889 | 0.95423143  |
| -0.001733333 | 0.031        | -0.067633333 | 0.954202034 |
| 0.027766667  | 0.082866667  | -0.067722222 | 0.954143244 |
| -0.170233333 | -0.020933333 | -0.067755556 | 0.954121199 |
| -0.310066667 | 0.065        | -0.067788889 | 0.954099155 |
| 0.0032       | -0.0129      | -0.0678      | 0.954091807 |
| -0.0823      | -0.0373      | -0.067888889 | 0.954033024 |
| -0.059033333 | -0.120766667 | -0.067944444 | 0.953996286 |
| 0.1637       | 0.021066667  | -0.067988889 | 0.953966898 |
| 0.2514       | 0.161033333  | -0.067988889 | 0.953966898 |
| 0.111566667  | 0.059033333  | -0.068133333 | 0.95387139  |
| -0.161866667 | -0.156166667 | -0.068133333 | 0.95387139  |
| -0.013366667 | -0.263866667 | -0.068177778 | 0.953842005 |
| 0.1269       | -0.088166667 | -0.068266667 | 0.953783238 |
| -0.100833333 | -0.1349      | -0.0685      | 0.953628991 |
| -0.0228      | 0.016266667  | -0.068544444 | 0.953599613 |
| 0.042766667  | -0.0742      | -0.068655556 | 0.953526173 |
| -0.2949      | -0.142333333 | -0.068666667 | 0.953518829 |
| -0.0063      | -0.024933333 | -0.068855556 | 0.953393996 |
| -0.069       | -0.0568      | -0.0689      | 0.953364625 |
| -0.142833333 | 0.022633333  | -0.068944444 | 0.953335256 |

|              |              |              |             |
|--------------|--------------|--------------|-------------|
| -0.076866667 | 0.110833333  | -0.068966667 | 0.953320571 |
| -0.111533333 | -0.0984      | -0.068988889 | 0.953305887 |
| -0.1201      | -0.130233333 | -0.069177778 | 0.953181081 |
| 0.0512       | 0.0332       | -0.069311111 | 0.953092993 |
| -0.1481      | -0.0674      | -0.069411111 | 0.953026932 |
| 0.069366667  | -0.045533333 | -0.069455556 | 0.952997573 |
| 0.087866667  | 0.0374       | -0.069555556 | 0.952931518 |
| 0.065533333  | 0.052266667  | -0.069588889 | 0.952909501 |
| -0.088033333 | 0.0393       | -0.069655556 | 0.952865468 |
| 0.048033333  | -0.119966667 | -0.069744444 | 0.952806761 |
| -0.119766667 | -0.055366667 | -0.069744444 | 0.952806761 |
| -0.030333333 | -0.1901      | -0.07        | 0.952637998 |
| -0.093733333 | -0.128966667 | -0.07        | 0.952637998 |
| -0.0837      | -0.0871      | -0.070055556 | 0.952601314 |
| -0.086833333 | -0.160333333 | -0.070144444 | 0.952542624 |
| -0.044366667 | -0.068466667 | -0.070222222 | 0.952491272 |
| -0.025266667 | -0.089966667 | -0.070611111 | 0.952234556 |
| 0.038233333  | 0.0454       | -0.070688889 | 0.952183221 |
| 0.0319       | -0.324266667 | -0.070722222 | 0.952161221 |
| -0.022266667 | -0.165466667 | -0.070855556 | 0.952073226 |
| 0.038466667  | -0.223066667 | -0.070888889 | 0.952051229 |
| -0.0171      | 0.023266667  | -0.0709      | 0.952043897 |
| -0.1648      | -0.194566667 | -0.070933333 | 0.9520219   |
| 0.115333333  | -0.165866667 | -0.071066667 | 0.951933919 |
| -0.063       | 0.0233       | -0.071111111 | 0.951904593 |
| 0.035466667  | 0.0444       | -0.071111111 | 0.951904593 |
| -0.0041      | 0.163366667  | -0.071122222 | 0.951897262 |
| 0.165666667  | 0.216466667  | -0.071211111 | 0.951838615 |
| -0.181866667 | -0.0947      | -0.071211111 | 0.951838615 |
| -0.1291      | -0.170033333 | -0.071255556 | 0.951809292 |
| -0.117733333 | -0.0924      | -0.071322222 | 0.95176531  |
| 0.0437       | -0.0647      | -0.071377778 | 0.95172866  |
| 0.210966667  | -0.032133333 | -0.0715      | 0.951648035 |
| -0.1504      | 0.155833333  | -0.071577778 | 0.951596732 |
| 0.040466667  | -0.085433333 | -0.071588889 | 0.951589403 |
| -0.083433333 | 0.1164       | -0.071644444 | 0.95155276  |
| 0.113033333  | -0.1334      | -0.071688889 | 0.951523446 |
| 0.0839       | -0.108066667 | -0.0717      | 0.951516118 |
| -0.0806      | -0.0574      | -0.071766667 | 0.95147215  |
| -0.2091      | -0.0148      | -0.071811111 | 0.951442838 |
| 0.008166667  | -0.167033333 | -0.071811111 | 0.951442838 |
| -0.078466667 | 0.023233333  | -0.071844444 | 0.951420856 |
| 0.1806       | 0.0791       | -0.0719      | 0.951384219 |
| -0.114666667 | -0.0747      | -0.072022222 | 0.951303623 |
| -0.169766667 | -0.036433333 | -0.0723      | 0.951120476 |
| -0.126133333 | -0.026633333 | -0.072311111 | 0.951113151 |
| 0.050133333  | -0.007       | -0.072311111 | 0.951113151 |

|              |              |              |             |
|--------------|--------------|--------------|-------------|
| -0.008466667 | -0.0155      | -0.072355556 | 0.951083851 |
| 0.241733333  | -0.143       | -0.072366667 | 0.951076526 |
| -0.035633333 | -0.105166667 | -0.072366667 | 0.951076526 |
| -0.085466667 | -0.040733333 | -0.072411111 | 0.951047227 |
| 0.053166667  | 0.062233333  | -0.072466667 | 0.951010604 |
| -0.125033333 | -0.217633333 | -0.072533333 | 0.950966659 |
| -0.260266667 | -0.084033333 | -0.072566667 | 0.950944688 |
| 0.092166667  | 0.189666667  | -0.0726      | 0.950922716 |
| -0.075133333 | -0.031766667 | -0.072611111 | 0.950915393 |
| -0.0702      | -0.1256      | -0.072688889 | 0.950864129 |
| 0.031466667  | 0.154433333  | -0.072711111 | 0.950849483 |
| 0.063866667  | -0.055466667 | -0.072777778 | 0.950805545 |
| -0.025433333 | -0.087766667 | -0.072877778 | 0.950739643 |
| -0.186333333 | -0.0485      | -0.072988889 | 0.950666423 |
| -0.000133333 | 0.076833333  | -0.073       | 0.950659101 |
| -0.275366667 | -0.159933333 | -0.073155556 | 0.950556604 |
| -0.110233333 | -0.024166667 | -0.073155556 | 0.950556604 |
| -0.1404      | -0.2919      | -0.073211111 | 0.95052     |
| 0.151        | 0.086533333  | -0.073311111 | 0.950454118 |
| -0.149466667 | -0.110666667 | -0.073322222 | 0.950446798 |
| 0.092233333  | -0.3341      | -0.073355556 | 0.950424838 |
| -0.065733333 | -0.048866667 | -0.073455556 | 0.950358962 |
| 0.080266667  | -0.060366667 | -0.073511111 | 0.950322366 |
| 0.0437       | 0.0311       | -0.073655556 | 0.950227223 |
| -0.1222      | -0.121233333 | -0.073866667 | 0.950088186 |
| -0.0264      | -0.018466667 | -0.073877778 | 0.950080868 |
| -0.027133333 | -0.074366667 | -0.073977778 | 0.950015016 |
| -0.126566667 | 0.016966667  | -0.074111111 | 0.94992722  |
| -0.110133333 | -0.184233333 | -0.074166667 | 0.949890641 |
| 0.140666667  | -0.314533333 | -0.0742      | 0.949868694 |
| 0.0799       | 0.080366667  | -0.0742      | 0.949868694 |
| 0.005766667  | -0.0884      | -0.074444444 | 0.949707766 |
| 0.036466667  | 0.028        | -0.074633333 | 0.949583431 |
| -0.0814      | -0.0217      | -0.074688889 | 0.949546865 |
| -0.0374      | -0.022466667 | -0.0747      | 0.949539552 |
| -0.1183      | 0.035166667  | -0.074733333 | 0.949517613 |
| -0.162266667 | -0.002966667 | -0.074744444 | 0.9495103   |
| 0.077666667  | 0.1599       | -0.074766667 | 0.949495675 |
| -0.055466667 | 0.093333333  | -0.074788889 | 0.949481049 |
| -0.162633333 | 0.066133333  | -0.074833333 | 0.9494518   |
| -0.1106      | -0.0141      | -0.074833333 | 0.9494518   |
| -0.2168      | -0.176266667 | -0.074855556 | 0.949437175 |
| -0.002233333 | -0.1886      | -0.074988889 | 0.949349432 |
| 0.042233333  | -0.031733333 | -0.075066667 | 0.949298253 |
| -0.1836      | -0.126066667 | -0.0751      | 0.94927632  |
| 0.0746       | 0.0256       | -0.075144444 | 0.949247076 |
| -0.061366667 | -0.0927      | -0.075222222 | 0.949195902 |

|              |              |              |             |
|--------------|--------------|--------------|-------------|
| -0.071233333 | -0.008433333 | -0.075244444 | 0.949181282 |
| 0.112733333  | 0.2069       | -0.075444444 | 0.949049707 |
| 0.012566667  | 0.0982       | -0.075455556 | 0.949042397 |
| -0.045666667 | -0.244766667 | -0.075455556 | 0.949042397 |
| 0.0063       | -0.0567      | -0.075488889 | 0.94902047  |
| 0.056633333  | 0.060233333  | -0.0755      | 0.949013161 |
| -0.149733333 | -0.021533333 | -0.0755      | 0.949013161 |
| -0.019566667 | 0.191166667  | -0.075533333 | 0.948991234 |
| 0.035166667  | -0.0166      | -0.075622222 | 0.948932766 |
| -0.070666667 | -0.127066667 | -0.075655556 | 0.948910841 |
| -0.097       | 0.071433333  | -0.075722222 | 0.948866993 |
| -0.027       | -0.118233333 | -0.075766667 | 0.948837762 |
| -0.015033333 | -0.0287      | -0.075811111 | 0.948808532 |
| -0.0463      | -0.069433333 | -0.075877778 | 0.948764689 |
| 0.075733333  | 0.116433333  | -0.075944444 | 0.948720848 |
| -0.012733333 | -0.1169      | -0.075977778 | 0.948698928 |
| -0.0807      | -0.0836      | -0.076033333 | 0.948662396 |
| -0.096133333 | -0.142133333 | -0.076044444 | 0.94865509  |
| -0.0299      | 0.039933333  | -0.076044444 | 0.94865509  |
| 0.038233333  | 0.0652       | -0.076222222 | 0.948538198 |
| -0.050333333 | 0.212266667  | -0.0763      | 0.948487062 |
| 0.126966667  | 0.009333333  | -0.076422222 | 0.948406712 |
| -0.055533333 | -0.2993      | -0.076444444 | 0.948392103 |
| 0.037866667  | 0.024166667  | -0.076466667 | 0.948377495 |
| 0.129266667  | 0.010633333  | -0.0766      | 0.94828985  |
| -0.085233333 | 0.0149       | -0.076688889 | 0.948231425 |
| -0.0226      | -0.044433333 | -0.0767      | 0.948224122 |
| 0.0016       | -0.021566667 | -0.0767      | 0.948224122 |
| -0.081433333 | 0.075466667  | -0.076733333 | 0.948202214 |
| -0.1107      | 0.0843       | -0.076911111 | 0.948085378 |
| -0.069866667 | -0.162066667 | -0.076944444 | 0.948063473 |
| -0.1513      | 0.0548       | -0.076966667 | 0.948048869 |
| 0.0645       | 0.0793       | -0.076988889 | 0.948034267 |
| -0.0317      | -0.0951      | -0.077077778 | 0.947975857 |
| -0.210866667 | -0.3357      | -0.077222222 | 0.947880949 |
| -0.15        | -0.008566667 | -0.077288889 | 0.947837149 |
| -0.043933333 | -0.0536      | -0.077411111 | 0.947756853 |
| 0.011066667  | 0.019833333  | -0.077422222 | 0.947749554 |
| 0.298833333  | -0.138233333 | -0.077444444 | 0.947734956 |
| 0.043433333  | -0.147933333 | -0.077488889 | 0.94770576  |
| 0.0206       | 0.1356       | -0.077488889 | 0.94770576  |
| -0.0692      | -0.151       | -0.077611111 | 0.947625475 |
| -0.263       | -0.095466667 | -0.077622222 | 0.947618177 |
| 0.2617       | 0.0547       | -0.077644444 | 0.947603581 |
| 0.297533333  | 0.0852       | -0.077855556 | 0.947464927 |
| 0.088233333  | -0.0135      | -0.077866667 | 0.94745763  |
| -0.0164      | -0.0319      | -0.078       | 0.947370071 |

|              |              |              |             |
|--------------|--------------|--------------|-------------|
| -0.074233333 | -0.043866667 | -0.078011111 | 0.947362774 |
| -0.062566667 | -0.046933333 | -0.078044444 | 0.947340886 |
| -0.170833333 | -0.132866667 | -0.078055556 | 0.94733359  |
| -0.157033333 | -0.276966667 | -0.078111111 | 0.94729711  |
| -0.1396      | -0.107966667 | -0.078122222 | 0.947289815 |
| -0.0634      | 0.065866667  | -0.078133333 | 0.947282519 |
| 0.029533333  | -0.1383      | -0.078177778 | 0.947253337 |
| 0.137633333  | 0.033566667  | -0.078177778 | 0.947253337 |
| -0.003433333 | -0.191333333 | -0.0782      | 0.947238746 |
| -0.183966667 | 0.0297       | -0.078233333 | 0.947216861 |
| -0.113366667 | -0.160233333 | -0.078466667 | 0.947063676 |
| -0.046166667 | -0.011333333 | -0.078522222 | 0.947027207 |
| -0.1098      | -0.126233333 | -0.078811111 | 0.94683759  |
| -0.020566667 | -0.0113      | -0.078933333 | 0.94675738  |
| -0.300166667 | -0.1371      | -0.079       | 0.946713631 |
| -0.182833333 | -0.278633333 | -0.079111111 | 0.946640722 |
| 0.330466667  | 0.214166667  | -0.079111111 | 0.946640722 |
| -0.111766667 | -0.157733333 | -0.079144444 | 0.94661885  |
| 0.028733333  | -0.0433      | -0.079155556 | 0.946611559 |
| -0.120566667 | 0.009866667  | -0.079211111 | 0.946575108 |
| -0.110266667 | -0.008433333 | -0.079288889 | 0.946524078 |
| 0.010866667  | -0.0867      | -0.079344444 | 0.94648763  |
| 0.2049       | -0.051066667 | -0.079411111 | 0.946443894 |
| -0.232       | -0.122233333 | -0.079411111 | 0.946443894 |
| -0.1817      | -0.166266667 | -0.079433333 | 0.946429315 |
| -0.5384      | -0.257566667 | -0.079477778 | 0.94640016  |
| -0.029633333 | 0.0826       | -0.079622222 | 0.94630541  |
| 0.0633       | 0.040866667  | -0.079677778 | 0.94626897  |
| -0.045966667 | 0.1191       | -0.079677778 | 0.94626897  |
| -0.204933333 | -0.2132      | -0.079722222 | 0.946239819 |
| 0.085766667  | -0.065866667 | -0.079777778 | 0.946203382 |
| 0.071133333  | -0.145133333 | -0.0798      | 0.946188807 |
| -0.1594      | -0.2591      | -0.079866667 | 0.946145085 |
| -0.245033333 | -0.1085      | -0.079955556 | 0.946086792 |
| 0.007833333  | -0.0178      | -0.079988889 | 0.946064933 |
| -0.0268      | -0.069666667 | -0.080044444 | 0.946028502 |
| -0.272966667 | -0.1899      | -0.080044444 | 0.946028502 |
| 0.036066667  | 0.001266667  | -0.080055556 | 0.946021216 |
| 0.2768       | -0.1239      | -0.080111111 | 0.945984788 |
| -0.002433333 | -0.011666667 | -0.080411111 | 0.945788096 |
| 0.3515       | 0.018933333  | -0.080444444 | 0.945766244 |
| -0.240966667 | -0.1311      | -0.080444444 | 0.945766244 |
| 0.0971       | 0.104033333  | -0.080444444 | 0.945766244 |
| -0.082033333 | -0.046266667 | -0.080566667 | 0.945686124 |
| -0.1585      | -0.1406      | -0.0806      | 0.945664274 |
| -0.070633333 | -0.096133333 | -0.080711111 | 0.945591445 |
| -0.0331      | 0.059033333  | -0.0808      | 0.945533186 |

|              |              |              |             |
|--------------|--------------|--------------|-------------|
| 0.008766667  | 0.000733333  | -0.080877778 | 0.945482213 |
| -0.1464      | -0.098066667 | -0.080966667 | 0.94542396  |
| 0.065533333  | -0.203466667 | -0.080988889 | 0.945409398 |
| -0.121633333 | 0.0503       | -0.081077778 | 0.94535115  |
| -0.232       | -0.2239      | -0.081077778 | 0.94535115  |
| -0.3079      | -0.2894      | -0.081088889 | 0.945343869 |
| -0.1438      | -0.065766667 | -0.081255556 | 0.945234665 |
| 0.0612       | 0.031533333  | -0.081366667 | 0.94516187  |
| -0.013633333 | -0.056133333 | -0.081388889 | 0.945147311 |
| -0.137033333 | 0.094766667  | -0.081555556 | 0.94503813  |
| -0.089166667 | -0.0772      | -0.081611111 | 0.945001739 |
| -0.1829      | -0.114733333 | -0.081666667 | 0.944965349 |
| -0.180466667 | -0.038066667 | -0.0817      | 0.944943516 |
| 0.021533333  | -0.1292      | -0.081822222 | 0.944863466 |
| -0.115133333 | -0.0333      | -0.081866667 | 0.944834358 |
| 0.0212       | 0.086433333  | -0.081922222 | 0.944797975 |
| -0.0876      | -0.0476      | -0.081933333 | 0.944790699 |
| -0.0461      | -0.3361      | -0.081966667 | 0.94476887  |
| -0.337466667 | -0.3041      | -0.082488889 | 0.944426947 |
| 0.102133333  | 0.011633333  | -0.082744444 | 0.944259668 |
| -0.070366667 | -0.0938      | -0.082766667 | 0.944245124 |
| 0.0771       | -0.453866667 | -0.082777778 | 0.944237851 |
| -0.026833333 | 0.0055       | -0.0828      | 0.944223307 |
| -0.176       | -0.086166667 | -0.082833333 | 0.944201491 |
| 0.3875       | -0.174533333 | -0.082866667 | 0.944179676 |
| 0.1141       | -0.056433333 | -0.082888889 | 0.944165133 |
| -0.3241      | -0.2426      | -0.082922222 | 0.944143318 |
| -0.157333333 | -0.0296      | -0.082944444 | 0.944128775 |
| -0.211266667 | -0.1236      | -0.082955556 | 0.944121504 |
| -0.0615      | -0.0528      | -0.082966667 | 0.944114233 |
| 0.0259       | 0.138733333  | -0.082977778 | 0.944106961 |
| 0.0035       | -0.149766667 | -0.083011111 | 0.944085148 |
| -0.069766667 | 0.06         | -0.083144444 | 0.9439979   |
| -0.0205      | -0.494666667 | -0.083211111 | 0.943954279 |
| -0.202533333 | 0.003233333  | -0.083288889 | 0.943903391 |
| -0.158666667 | -0.139133333 | -0.083366667 | 0.943852505 |
| -0.004766667 | 0.017533333  | -0.083377778 | 0.943845236 |
| -0.086566667 | -0.0948      | -0.083644444 | 0.943670792 |
| 0.058433333  | -0.015366667 | -0.083711111 | 0.943627186 |
| 0.0423       | 0.1355       | -0.083933333 | 0.943481848 |
| -0.207966667 | 0.085466667  | -0.083955556 | 0.943467315 |
| 0.137466667  | -0.0693      | -0.083988889 | 0.943445517 |
| 0.2325       | 0.036866667  | -0.084       | 0.943438251 |
| 0.006933333  | -0.104433333 | -0.084111111 | 0.943365594 |
| -0.0783      | 0.040666667  | -0.084144444 | 0.943343797 |
| -0.005233333 | 0.081        | -0.084244444 | 0.943278412 |
| -0.1025      | -0.241833333 | -0.084333333 | 0.943220296 |

|              |              |              |             |
|--------------|--------------|--------------|-------------|
| -0.0153      | 0.113833333  | -0.084355556 | 0.943205767 |
| 0.054233333  | -0.137633333 | -0.084411111 | 0.943169447 |
| 0.0038       | -0.0051      | -0.084477778 | 0.943125864 |
| 0.074133333  | -0.0106      | -0.084766667 | 0.942937029 |
| -0.1255      | -0.094633333 | -0.084833333 | 0.942893457 |
| 0.077233333  | 0.1452       | -0.084866667 | 0.942871672 |
| -0.0488      | -0.178133333 | -0.084911111 | 0.942842626 |
| -0.098733333 | -0.074066667 | -0.084922222 | 0.942835364 |
| -0.139433333 | 0.041066667  | -0.085011111 | 0.942777275 |
| 0.037266667  | 0.0308       | -0.085033333 | 0.942762753 |
| -0.148033333 | -0.066733333 | -0.085144444 | 0.942690148 |
| 0.000166667  | 0.044933333  | -0.085166667 | 0.942675627 |
| -0.158933333 | 0.030166667  | -0.085166667 | 0.942675627 |
| -0.088666667 | 0.038566667  | -0.085233333 | 0.942632068 |
| -0.141533333 | 0.049266667  | -0.085288889 | 0.942595769 |
| -0.059666667 | -0.069466667 | -0.085333333 | 0.942566732 |
| 0.0584       | -0.1172      | -0.085444444 | 0.942494141 |
| 0.1103       | 0.069666667  | -0.085666667 | 0.942348978 |
| -0.219066667 | 0.092        | -0.0857      | 0.942327205 |
| 0.3612       | 0.517833333  | -0.085711111 | 0.942319948 |
| -0.117633333 | -0.1615      | -0.085755556 | 0.942290918 |
| -0.006       | -0.0244      | -0.085811111 | 0.942254633 |
| 0.0359       | -0.002433333 | -0.085833333 | 0.942240119 |
| -0.0246      | -0.0151      | -0.085855556 | 0.942225606 |
| 0.094233333  | 0.0712       | -0.085944444 | 0.942167554 |
| 0.161233333  | 0.0653       | -0.086077778 | 0.942080484 |
| -0.035366667 | 0.043433333  | -0.086233333 | 0.941978911 |
| -0.002133333 | -0.084366667 | -0.0863      | 0.941935384 |
| -0.046133333 | 0.1353       | -0.086355556 | 0.941899112 |
| -0.201633333 | -0.142533333 | -0.086533333 | 0.941783053 |
| -0.261933333 | -0.01        | -0.086544444 | 0.941775799 |
| -0.1548      | 0.03         | -0.086577778 | 0.94175404  |
| 0.207466667  | -0.264033333 | -0.086655556 | 0.94170327  |
| 0.048266667  | -0.0469      | -0.086677778 | 0.941688765 |
| 0.0482       | 0.125833333  | -0.086711111 | 0.941667007 |
| -0.000666667 | -0.077433333 | -0.086766667 | 0.941630746 |
| -0.0924      | 0.068833333  | -0.086766667 | 0.941630746 |
| -0.004333333 | -0.072       | -0.086766667 | 0.941630746 |
| 0.011033333  | 0.1082       | -0.0868      | 0.94160899  |
| -0.111666667 | 0.126266667  | -0.0868      | 0.94160899  |
| -0.003966667 | -0.0437      | -0.086833333 | 0.941587235 |
| 0.0122       | -0.0103      | -0.086977778 | 0.941492967 |
| -0.128266667 | -0.121566667 | -0.086988889 | 0.941485715 |
| 0.0384       | 0.0009       | -0.087066667 | 0.94143496  |
| 0.067366667  | 0.078566667  | -0.0871      | 0.941413208 |
| -0.0492      | -0.112666667 | -0.087122222 | 0.941398708 |
| -0.067       | -0.0368      | -0.087122222 | 0.941398708 |



|              |              |              |             |
|--------------|--------------|--------------|-------------|
| -0.096633333 | 0.058766667  | -0.087133333 | 0.941391457 |
| -0.202366667 | -0.254033333 | -0.087177778 | 0.941362457 |
| -0.077166667 | -0.1147      | -0.087211111 | 0.941340707 |
| 0.052166667  | -0.014466667 | -0.087222222 | 0.941333457 |
| -0.016166667 | -0.046633333 | -0.087288889 | 0.941289959 |
| -0.048766667 | -0.09        | -0.087311111 | 0.941275461 |
| 0.076166667  | -0.1521      | -0.087322222 | 0.941268211 |
| -0.143666667 | -0.151666667 | -0.087333333 | 0.941260962 |
| -0.183866667 | -0.122366667 | -0.087433333 | 0.941195721 |
| 0.0666       | 0.058166667  | -0.087466667 | 0.941173975 |
| -0.076       | 0.0938       | -0.087533333 | 0.941130485 |
| -0.0547      | 0.009166667  | -0.087555556 | 0.941115988 |
| -0.084333333 | -0.0548      | -0.087666667 | 0.94104351  |
| -0.083       | -0.020533333 | -0.0878      | 0.940956543 |
| 0.069833333  | 0.020566667  | -0.087833333 | 0.940934802 |
| -0.093533333 | -0.035266667 | -0.087911111 | 0.940884076 |
| 0.070233333  | 0.005833333  | -0.087922222 | 0.94087683  |
| 0.011833333  | 0.000866667  | -0.087977778 | 0.940840599 |
| 0.065866667  | -0.033033333 | -0.088144444 | 0.940731916 |
| -0.168933333 | -0.2578      | -0.088211111 | 0.940688445 |
| -0.004566667 | 0.0003       | -0.088233333 | 0.940673956 |
| -0.011266667 | 0.013666667  | -0.088366667 | 0.940587023 |
| -0.041033333 | -0.038966667 | -0.088633333 | 0.940413182 |
| 0.010533333  | -0.086966667 | -0.088655556 | 0.940398697 |
| -0.0327      | -0.135266667 | -0.088688889 | 0.940376969 |
| -0.1056      | 0.0445       | -0.088711111 | 0.940362484 |
| -0.123133333 | 0.281466667  | -0.088777778 | 0.940319031 |
| -0.1345      | 0.003466667  | -0.0888      | 0.940304547 |
| -0.0973      | -0.050366667 | -0.088933333 | 0.940217649 |
| 0.033666667  | 0.111766667  | -0.088977778 | 0.940188684 |
| -0.191       | 0.0142       | -0.088988889 | 0.940181443 |
| -0.274233333 | -0.164666667 | -0.089122222 | 0.940094556 |
| -0.038366667 | 0.080566667  | -0.089377778 | 0.939928045 |
| -0.114033333 | -0.0427      | -0.089544444 | 0.939819466 |
| -0.110033333 | -0.119333333 | -0.089633333 | 0.939761563 |
| -0.082366667 | -0.119366667 | -0.089722222 | 0.939703663 |
| 0.062566667  | -0.032533333 | -0.089788889 | 0.939660241 |
| -0.156866667 | -0.2717      | -0.089877778 | 0.939602347 |
| -0.037766667 | -0.165       | -0.09        | 0.939522749 |
| 0.063533333  | -0.048766667 | -0.090055556 | 0.939486571 |
| 0.307566667  | -0.164666667 | -0.090077778 | 0.9394721   |
| -0.0551      | -0.025566667 | -0.090077778 | 0.9394721   |
| 0.095933333  | -0.0554      | -0.090177778 | 0.939406983 |
| -0.023966667 | 0.1241       | -0.090188889 | 0.939399748 |
| 0.018533333  | 0.194166667  | -0.090377778 | 0.939276762 |
| -0.127833333 | 0.013866667  | -0.090422222 | 0.939247827 |
| -0.090066667 | -0.021333333 | -0.090444444 | 0.939233359 |

|              |              |              |             |
|--------------|--------------|--------------|-------------|
| 0.145366667  | 0.049933333  | -0.090477778 | 0.939211659 |
| -0.0637      | 0.019133333  | -0.090555556 | 0.939161026 |
| 0.027366667  | -0.075566667 | -0.090611111 | 0.939124861 |
| -0.017466667 | -0.020533333 | -0.090644444 | 0.939103163 |
| -0.107866667 | -0.181333333 | -0.090688889 | 0.939074233 |
| -0.068166667 | -0.0271      | -0.090922222 | 0.938922365 |
| -0.236033333 | 0.005833333  | -0.090966667 | 0.93889344  |
| 0.050666667  | -0.030133333 | -0.091166667 | 0.938763291 |
| -0.0284      | -0.006266667 | -0.091233333 | 0.938719912 |
| -0.0742      | 0.058266667  | -0.091288889 | 0.938683764 |
| 0.034866667  | 0.008566667  | -0.091333333 | 0.938654847 |
| 0.054866667  | 0.0298       | -0.0914      | 0.938611473 |
| -0.1551      | -0.1178      | -0.091444444 | 0.938582558 |
| 0.004233333  | -0.039766667 | -0.091444444 | 0.938582558 |
| -0.0535      | -0.142933333 | -0.091488889 | 0.938553644 |
| 0.0359       | -0.0357      | -0.091711111 | 0.938409087 |
| 0.041066667  | -0.0545      | -0.091744444 | 0.938387405 |
| -0.144333333 | -0.053266667 | -0.091777778 | 0.938365724 |
| 0.0307       | 0.273233333  | -0.091777778 | 0.938365724 |
| 0.085066667  | 0.0369       | -0.091833333 | 0.93832959  |
| -0.053766667 | -0.105166667 | -0.091833333 | 0.93832959  |
| 0.0862       | 0.115366667  | -0.091855556 | 0.938315137 |
| 0.086233333  | 0.011        | -0.091888889 | 0.938293458 |
| 0.172766667  | -0.233366667 | -0.091988889 | 0.938228422 |
| -0.088866667 | -0.116433333 | -0.092044444 | 0.938192294 |
| -0.1856      | -0.099933333 | -0.092055556 | 0.938185068 |
| 0.191966667  | 0.0903       | -0.092088889 | 0.938163392 |
| -0.102833333 | -0.147       | -0.092111111 | 0.938148941 |
| 0.152366667  | -0.0035      | -0.092122222 | 0.938141716 |
| -0.222833333 | -0.057466667 | -0.092211111 | 0.938083916 |
| -0.172533333 | -0.053366667 | -0.092233333 | 0.938069466 |
| -0.166466667 | -0.158       | -0.092244444 | 0.938062242 |
| -0.0295      | 0.056566667  | -0.092277778 | 0.938040568 |
| -0.183733333 | -0.0435      | -0.092288889 | 0.938033344 |
| -0.1276      | -0.061666667 | -0.092311111 | 0.938018895 |
| -0.091933333 | -0.142233333 | -0.092322222 | 0.938011671 |
| 0.087233333  | 0.1104       | -0.092333333 | 0.938004446 |
| -0.031666667 | 0.020333333  | -0.092611111 | 0.93782386  |
| -0.024766667 | 0.022366667  | -0.092644444 | 0.937802192 |
| -0.090733333 | -0.157933333 | -0.092833333 | 0.937679415 |
| -0.007166667 | -0.146633333 | -0.093       | 0.937571096 |
| 0.050366667  | 0.062633333  | -0.093033333 | 0.937549434 |
| -0.007333333 | -0.118966667 | -0.093188889 | 0.93744835  |
| -0.1224      | 0.066933333  | -0.093244444 | 0.937412252 |
| -0.046433333 | -0.1535      | -0.093288889 | 0.937383374 |
| -0.241133333 | -0.059333333 | -0.093522222 | 0.937231779 |
| -0.122233333 | 0.0583       | -0.093555556 | 0.937210124 |

|              |              |              |             |
|--------------|--------------|--------------|-------------|
| -0.065233333 | 0.039966667  | -0.093644444 | 0.937152382 |
| -0.350233333 | -0.217966667 | -0.093733333 | 0.937094643 |
| 0.012        | 0.0666       | -0.093766667 | 0.937072992 |
| -0.041766667 | -0.129133333 | -0.093844444 | 0.937022474 |
| 0.2121       | -0.167333333 | -0.093866667 | 0.937008041 |
| -0.1841      | -0.058766667 | -0.093955556 | 0.936950311 |
| 0.0354       | -0.0124      | -0.094011111 | 0.936914231 |
| -0.1108      | -0.031366667 | -0.094044444 | 0.936892584 |
| -0.000666667 | -0.005033333 | -0.094055556 | 0.936885368 |
| -0.012166667 | 0.1482       | -0.094111111 | 0.936849291 |
| 0.050866667  | -0.266266667 | -0.094122222 | 0.936842076 |
| -0.144133333 | 0.117433333  | -0.094133333 | 0.936834861 |
| -0.154033333 | -0.2444      | -0.094188889 | 0.936798786 |
| -0.1426      | -0.062433333 | -0.0942      | 0.936791571 |
| 0.1973       | -0.0119      | -0.094222222 | 0.936777141 |
| 0.020266667  | 0.023566667  | -0.094244444 | 0.936762712 |
| 0.064466667  | 0.076633333  | -0.0944      | 0.936661713 |
| -0.0784      | 0.038133333  | -0.094622222 | 0.936517448 |
| 0.002266667  | -0.1701      | -0.094666667 | 0.936488597 |
| -0.104733333 | -0.1212      | -0.094688889 | 0.936474172 |
| -0.2544      | -0.0627      | -0.0947      | 0.93646696  |
| -0.024066667 | -0.060933333 | -0.094844444 | 0.936373204 |
| -0.080366667 | -0.1155      | -0.095077778 | 0.936221773 |
| -0.081666667 | -0.196233333 | -0.095155556 | 0.936171301 |
| 0.095033333  | 0.016333333  | -0.095166667 | 0.936164091 |
| -0.0443      | -0.1113      | -0.095222222 | 0.936128042 |
| -0.078833333 | -0.0977      | -0.095255556 | 0.936106413 |
| -0.072466667 | -0.0856      | -0.095277778 | 0.936091994 |
| 0.101866667  | -0.045166667 | -0.095355556 | 0.936041529 |
| 0.015466667  | -0.0037      | -0.095366667 | 0.93603432  |
| -0.0309      | -0.099733333 | -0.095377778 | 0.936027111 |
| 0.175133333  | -0.076466667 | -0.095377778 | 0.936027111 |
| -0.076566667 | -0.0934      | -0.095411111 | 0.936005485 |
| -0.036666667 | -0.140433333 | -0.095477778 | 0.935962233 |
| -0.121       | 0.0201       | -0.095577778 | 0.935897359 |
| -0.0471      | -0.109233333 | -0.095588889 | 0.935890152 |
| 0.008066667  | -0.142666667 | -0.095911111 | 0.935681146 |
| 0.053433333  | -0.201033333 | -0.095955556 | 0.935652322 |
| -0.364966667 | -0.3011      | -0.096022222 | 0.935609086 |
| -0.272433333 | -0.045666667 | -0.096277778 | 0.935443369 |
| 0.185533333  | -0.007266667 | -0.096388889 | 0.935371328 |
| 0.115833333  | -0.062       | -0.096511111 | 0.935292088 |
| 0.0464       | -0.031066667 | -0.096533333 | 0.935277682 |
| -0.252466667 | -0.0882      | -0.096544444 | 0.935270479 |
| -0.157133333 | -0.0466      | -0.096655556 | 0.93519845  |
| -0.1855      | -0.022833333 | -0.096666667 | 0.935191248 |
| -0.187766667 | 0.101966667  | -0.0968      | 0.935104822 |

|              |              |              |             |
|--------------|--------------|--------------|-------------|
| -0.044933333 | -0.092533333 | -0.096955556 | 0.935004002 |
| 0.0195       | -0.067066667 | -0.097077778 | 0.934924793 |
| -0.009566667 | -0.1047      | -0.097255556 | 0.934809593 |
| -0.1234      | -0.1599      | -0.097277778 | 0.934795194 |
| 0.116033333  | 0.0872       | -0.097311111 | 0.934773596 |
| -0.345666667 | -0.1462      | -0.097366667 | 0.9347376   |
| -0.0702      | -0.056533333 | -0.097388889 | 0.934723202 |
| -0.087233333 | 0.002233333  | -0.0974      | 0.934716004 |
| 0.0378       | -0.142833333 | -0.0974      | 0.934716004 |
| -0.075366667 | -0.071633333 | -0.097522222 | 0.93463682  |
| -0.137566667 | -0.1997      | -0.097555556 | 0.934615225 |
| -0.163366667 | -0.1615      | -0.097633333 | 0.93456484  |
| 0.0412       | 0.1637       | -0.097655556 | 0.934550445 |
| -0.166266667 | -0.174766667 | -0.097911111 | 0.934384915 |
| -0.058333333 | -0.019866667 | -0.098033333 | 0.93430576  |
| 0.0016       | -0.319166667 | -0.098066667 | 0.934284173 |
| 0.063333333  | -0.052733333 | -0.098111111 | 0.934255391 |
| -0.013066667 | 0.014333333  | -0.098188889 | 0.934205025 |
| -0.026566667 | -0.139966667 | -0.098255556 | 0.934161857 |
| -0.093766667 | -0.098466667 | -0.0984      | 0.934068332 |
| 0.0601       | -0.116766667 | -0.098422222 | 0.934053945 |
| 0.0814       | -0.0068      | -0.098588889 | 0.933946045 |
| -0.083866667 | -0.153366667 | -0.098611111 | 0.933931659 |
| -0.054133333 | 0.0293       | -0.098677778 | 0.933888503 |
| -0.021933333 | 0.089566667  | -0.098955556 | 0.933708709 |
| 0.019233333  | -0.039566667 | -0.098966667 | 0.933701518 |
| 0.308233333  | 0.108233333  | -0.099011111 | 0.933672754 |
| -0.133466667 | -0.093733333 | -0.099022222 | 0.933665563 |
| 0.1411       | 0.036566667  | -0.099111111 | 0.933608039 |
| -0.099633333 | -0.003566667 | -0.099255556 | 0.93351457  |
| 0.118533333  | 0.245266667  | -0.099266667 | 0.93350738  |
| -0.294933333 | -0.1463      | -0.099422222 | 0.933406732 |
| -0.0175      | -0.0608      | -0.099444444 | 0.933392355 |
| -0.142333333 | -0.147366667 | -0.099488889 | 0.933363601 |
| -0.0067      | -0.075866667 | -0.0996      | 0.933291719 |
| -0.025566667 | -0.051       | -0.099644444 | 0.933262968 |
| -0.176033333 | -0.271066667 | -0.099655556 | 0.93325578  |
| -0.022333333 | -0.055233333 | -0.099711111 | 0.933219843 |
| 0.276933333  | 0.058766667  | -0.099777778 | 0.93317672  |
| -0.187433333 | -0.055033333 | -0.099922222 | 0.933083294 |
| -0.059866667 | 0.006833333  | -0.099955556 | 0.933061735 |
| -0.1951      | -0.145733333 | -0.099966667 | 0.933054549 |
| 0.007733333  | -0.0766      | -0.100177778 | 0.932918025 |
| 0.0084       | -0.1422      | -0.100311111 | 0.932831809 |
| 0.113833333  | 0.1046       | -0.100411111 | 0.932767152 |
| -0.132866667 | -0.0882      | -0.100422222 | 0.932759968 |
| 0.021466667  | 0.047233333  | -0.100488889 | 0.932716866 |

|              |              |              |             |
|--------------|--------------|--------------|-------------|
| 0.073833333  | 0.012066667  | -0.100511111 | 0.9327025   |
| -0.0674      | -0.0071      | -0.100588889 | 0.932652218 |
| -0.1125      | -0.154633333 | -0.100611111 | 0.932637852 |
| -0.019433333 | -0.0113      | -0.100677778 | 0.932594756 |
| -0.055466667 | -0.127566667 | -0.100677778 | 0.932594756 |
| -0.083733333 | 0.0227       | -0.100811111 | 0.93250857  |
| -0.047333333 | 0.071766667  | -0.100811111 | 0.93250857  |
| 0.079766667  | 0.107033333  | -0.100888889 | 0.932458298 |
| 0.0194       | 0.088266667  | -0.100955556 | 0.93241521  |
| 0.1098       | -0.038066667 | -0.101055556 | 0.932350583 |
| -0.011266667 | -0.009766667 | -0.101255556 | 0.93222134  |
| 0.0756       | 0.0207       | -0.101344444 | 0.932163905 |
| -0.022366667 | -0.0809      | -0.101355556 | 0.932156726 |
| 0.028166667  | -0.0568      | -0.101366667 | 0.932149547 |
| 0.037033333  | 0.078133333  | -0.1014      | 0.93212801  |
| 0.0328       | -0.0291      | -0.1014      | 0.93212801  |
| 0.039166667  | 0.2201       | -0.101422222 | 0.932113652 |
| -0.104       | -0.026933333 | -0.101522222 | 0.932049045 |
| 0.085333333  | -0.014566667 | -0.101688889 | 0.931941377 |
| 0.0027       | -0.061       | -0.101811111 | 0.931862428 |
| 0.058566667  | -0.074466667 | -0.1022      | 0.931611272 |
| -0.269633333 | -0.2352      | -0.102233333 | 0.931589747 |
| 0.1658       | 0.054533333  | -0.1023      | 0.931546699 |
| -0.054166667 | -0.018333333 | -0.102444444 | 0.931453437 |
| -0.114633333 | -0.089366667 | -0.102511111 | 0.931410395 |
| -0.170266667 | -0.0586      | -0.102555556 | 0.931381702 |
| 0.115933333  | 0.189        | -0.102633333 | 0.931331491 |
| -0.172033333 | -0.249866667 | -0.102666667 | 0.931309973 |
| -0.069166667 | -0.1669      | -0.102744444 | 0.931259766 |
| 0.112933333  | -0.071033333 | -0.102788889 | 0.931231078 |
| 0.168433333  | -0.3148      | -0.102888889 | 0.931166532 |
| -0.2889      | -0.205933333 | -0.102911111 | 0.931152189 |
| -0.1448      | -0.1991      | -0.102933333 | 0.931137847 |
| -0.1243      | 0.167966667  | -0.102955556 | 0.931123504 |
| -0.045533333 | 0.0045       | -0.103       | 0.93109482  |
| -0.0737      | 0.1601       | -0.103011111 | 0.931087649 |
| 0.106933333  | -0.1008      | -0.103055556 | 0.931058966 |
| -0.017533333 | -0.042033333 | -0.103077778 | 0.931044625 |
| -0.0343      | -0.114766667 | -0.103144444 | 0.931001602 |
| -0.078466667 | -0.085533333 | -0.103211111 | 0.930958582 |
| 0.026833333  | -0.043333333 | -0.103266667 | 0.930922733 |
| -0.036066667 | -0.180466667 | -0.103366667 | 0.930858208 |
| -0.035666667 | 0.2336       | -0.103411111 | 0.930829532 |
| -0.0872      | 0.029166667  | -0.103433333 | 0.930815195 |
| 0.043166667  | -0.067633333 | -0.103466667 | 0.930793689 |
| -0.012666667 | 0.033866667  | -0.1035      | 0.930772183 |
| -0.179233333 | -0.085166667 | -0.103511111 | 0.930765014 |

|              |              |              |             |
|--------------|--------------|--------------|-------------|
| -0.014       | 0.001233333  | -0.103555556 | 0.930736341 |
| -0.0733      | -0.020133333 | -0.103566667 | 0.930729173 |
| -0.053633333 | -0.005633333 | -0.103577778 | 0.930722005 |
| -0.0164      | 0.008566667  | -0.103655556 | 0.93067183  |
| -0.036233333 | 0.230033333  | -0.103655556 | 0.93067183  |
| -0.065133333 | -0.0745      | -0.103677778 | 0.930657494 |
| -0.085333333 | -0.017333333 | -0.103722222 | 0.930628825 |
| -0.1239      | -0.074633333 | -0.103855556 | 0.93054282  |
| 0.1022       | -0.013333333 | -0.103855556 | 0.93054282  |
| 0.110766667  | 0.0631       | -0.104022222 | 0.930435326 |
| -0.121466667 | 0.0062       | -0.104077778 | 0.930399497 |
| -0.0314      | -0.070133333 | -0.104133333 | 0.93036367  |
| 0.0332       | -0.108266667 | -0.104144444 | 0.930356505 |
| -0.120466667 | -0.007166667 | -0.104222222 | 0.930306349 |
| 0.1004       | -0.046166667 | -0.104322222 | 0.930241867 |
| -0.0366      | -0.088433333 | -0.104411111 | 0.930184554 |
| -0.004466667 | -0.017266667 | -0.104466667 | 0.930148735 |
| -0.146433333 | -0.174066667 | -0.104466667 | 0.930148735 |
| -0.1618      | -0.023566667 | -0.104788889 | 0.929941012 |
| -0.0045      | 0.029933333  | -0.104788889 | 0.929941012 |
| -0.128933333 | -0.0246      | -0.1048      | 0.92993385  |
| -0.021633333 | -0.0402      | -0.104811111 | 0.929926688 |
| -0.084066667 | 0.188666667  | -0.104811111 | 0.929926688 |
| 0.0093       | -0.0419      | -0.104822222 | 0.929919526 |
| -0.1242      | -0.079533333 | -0.105033333 | 0.92978346  |
| -0.019466667 | 0.0416       | -0.105033333 | 0.92978346  |
| -0.149166667 | 0.278966667  | -0.105522222 | 0.929468436 |
| -0.170966667 | 0.013566667  | -0.105555556 | 0.929446961 |
| -0.027233333 | -0.0425      | -0.105677778 | 0.929368223 |
| -0.184233333 | -0.067833333 | -0.105755556 | 0.929318121 |
| 0.0291       | -0.0398      | -0.105766667 | 0.929310964 |
| -0.0437      | -0.0148      | -0.105966667 | 0.929182143 |
| 0.179        | -0.011433333 | -0.106166667 | 0.92905334  |
| -0.0819      | -0.115233333 | -0.1062      | 0.929031874 |
| 0.048866667  | -0.078066667 | -0.106333333 | 0.928946017 |
| 0.056633333  | -0.0204      | -0.106422222 | 0.928888784 |
| -0.131366667 | 0.0016       | -0.106588889 | 0.928781481 |
| -0.091333333 | -0.054       | -0.106633333 | 0.928752869 |
| -0.021433333 | -0.125533333 | -0.1067      | 0.928709952 |
| -0.019433333 | 0.0458       | -0.1067      | 0.928709952 |
| -0.094033333 | -0.2063      | -0.106811111 | 0.928638429 |
| 0.3242       | -0.145233333 | -0.106866667 | 0.928602669 |
| -0.102333333 | -0.0755      | -0.106888889 | 0.928588366 |
| -0.1178      | -0.2192      | -0.107011111 | 0.928509701 |
| -0.001633333 | 0.1126       | -0.107011111 | 0.928509701 |
| 0.185333333  | 0.0222       | -0.107244444 | 0.928359541 |
| -0.174133333 | -0.028       | -0.107266667 | 0.928345242 |

|              |              |              |             |
|--------------|--------------|--------------|-------------|
| -0.0022      | -0.022933333 | -0.1073      | 0.928323793 |
| 0.234466667  | 0.1587       | -0.107355556 | 0.928288045 |
| -0.1023      | -0.330366667 | -0.1074      | 0.928259448 |
| -0.009066667 | -0.099033333 | -0.107411111 | 0.928252299 |
| -0.025433333 | 0.145        | -0.107533333 | 0.928173663 |
| 0.011166667  | -0.071266667 | -0.107622222 | 0.928116477 |
| -0.0095      | -0.0553      | -0.107622222 | 0.928116477 |
| 0.176166667  | -0.060866667 | -0.107677778 | 0.928080738 |
| -0.0105      | -0.0501      | -0.107811111 | 0.927994969 |
| -0.196666667 | -0.1257      | -0.107822222 | 0.927987822 |
| -0.0671      | -0.0347      | -0.107833333 | 0.927980675 |
| -0.1645      | -0.210833333 | -0.107844444 | 0.927973528 |
| 0.3211       | -0.061333333 | -0.107911111 | 0.927930647 |
| -0.084566667 | -0.009533333 | -0.107933333 | 0.927916354 |
| -0.102666667 | -0.0314      | -0.1081      | 0.927809163 |
| 0.033566667  | -0.082866667 | -0.108222222 | 0.927730565 |
| 0.049933333  | 0.017366667  | -0.108277778 | 0.92769484  |
| 0.022733333  | 0.0122       | -0.108288889 | 0.927687695 |
| -0.104033333 | -0.0259      | -0.1084      | 0.927616251 |
| 0.338366667  | 0.271833333  | -0.1087      | 0.927423379 |
| -0.1554      | -0.064666667 | -0.108766667 | 0.927380524 |
| -0.0931      | 0.005266667  | -0.108955556 | 0.927259112 |
| 0.1133       | -0.080466667 | -0.108988889 | 0.927237688 |
| -0.1153      | -0.032033333 | -0.109022222 | 0.927216264 |
| -0.088066667 | -0.292033333 | -0.109044444 | 0.927201982 |
| -0.014766667 | 0.092733333  | -0.1091      | 0.927166278 |
| 0.0144       | -0.071833333 | -0.109133333 | 0.927144856 |
| -0.1153      | -0.0224      | -0.109255556 | 0.927066314 |
| 0.006566667  | -0.060733333 | -0.109266667 | 0.927059174 |
| 0.091766667  | 0.035333333  | -0.109288889 | 0.927044894 |
| -0.092       | -0.0724      | -0.109433333 | 0.926952082 |
| -0.0666      | 0.003166667  | -0.109522222 | 0.926894971 |
| -0.203866667 | -0.080766667 | -0.109677778 | 0.926795036 |
| -0.007566667 | -0.145333333 | -0.109755556 | 0.926745073 |
| 0.0189       | 0.069366667  | -0.109755556 | 0.926745073 |
| -0.006566667 | 0.110033333  | -0.109922222 | 0.926638017 |
| -0.310133333 | 0.095133333  | -0.110388889 | 0.926338327 |
| -0.134066667 | -0.065233333 | -0.110566667 | 0.926224185 |
| 0.065133333  | -0.158333333 | -0.110611111 | 0.926195652 |
| 0.0962       | 0.2371       | -0.110666667 | 0.926159986 |
| 0.056433333  | 0.056866667  | -0.110733333 | 0.92611719  |
| -0.2134      | -0.314133333 | -0.1109      | 0.926010206 |
| -0.064       | -0.048033333 | -0.1109      | 0.926010206 |
| -0.155633333 | 0.036766667  | -0.110955556 | 0.925974548 |
| -0.081133333 | -0.074166667 | -0.110955556 | 0.925974548 |
| -0.107766667 | -0.0063      | -0.110966667 | 0.925967417 |
| -0.028       | 0.086233333  | -0.111022222 | 0.92593176  |

|              |              |              |             |
|--------------|--------------|--------------|-------------|
| 0.007466667  | -0.396433333 | -0.111044444 | 0.925917498 |
| -0.238466667 | -0.1027      | -0.111133333 | 0.925860451 |
| -0.0295      | 0.145366667  | -0.111266667 | 0.925774887 |
| -0.069633333 | -0.045533333 | -0.111288889 | 0.925760627 |
| -0.2248      | -0.003133333 | -0.111466667 | 0.925646556 |
| -0.235566667 | -0.149533333 | -0.1116      | 0.925561012 |
| -0.097233333 | -0.084966667 | -0.111633333 | 0.925539628 |
| -0.157433333 | -0.037433333 | -0.111922222 | 0.925354314 |
| -0.276166667 | -0.2258      | -0.111933333 | 0.925347187 |
| -0.104033333 | -0.162066667 | -0.111933333 | 0.925347187 |
| -0.3975      | -0.2255      | -0.112       | 0.925304428 |
| 0.105766667  | 0.081266667  | -0.112033333 | 0.925283049 |
| -0.127166667 | 0.0209       | -0.112166667 | 0.925197539 |
| -0.056866667 | -0.085533333 | -0.112188889 | 0.925183288 |
| 0.111733333  | 0.066        | -0.112244444 | 0.925147661 |
| 0.0118       | -0.0575      | -0.112522222 | 0.92496955  |
| 0.042333333  | -0.080733333 | -0.112566667 | 0.924941055 |
| -0.099633333 | -0.199433333 | -0.112666667 | 0.924876945 |
| 0.002666667  | -0.014533333 | -0.1127      | 0.924855576 |
| 0.0271       | 0.1553       | -0.1127      | 0.924855576 |
| -0.0208      | -0.007533333 | -0.112777778 | 0.924805717 |
| 0.009166667  | 0.0508       | -0.112833333 | 0.924770106 |
| -0.177466667 | -0.202633333 | -0.112922222 | 0.924713129 |
| 0.128933333  | -0.0472      | -0.112933333 | 0.924706008 |
| 0.0129       | -0.035666667 | -0.112944444 | 0.924698886 |
| -0.1162      | -0.075366667 | -0.112944444 | 0.924698886 |
| -0.188766667 | 0.010533333  | -0.113055556 | 0.924627672 |
| -0.1972      | -0.0218      | -0.1131      | 0.924599188 |
| -0.086066667 | -0.0554      | -0.113144444 | 0.924570704 |
| -3.33E-05    | -0.1453      | -0.113155556 | 0.924563584 |
| -0.065366667 | -0.048966667 | -0.113222222 | 0.924520861 |
| -0.003266667 | -0.0754      | -0.113355556 | 0.924435421 |
| -0.2169      | -0.050166667 | -0.1134      | 0.924406943 |
| -0.160133333 | -0.214533333 | -0.113422222 | 0.924392704 |
| -0.004033333 | 0.015866667  | -0.113433333 | 0.924385584 |
| 0.056        | -0.043833333 | -0.113533333 | 0.924321513 |
| -0.1829      | -0.032433333 | -0.113755556 | 0.924179148 |
| -0.135033333 | -0.071666667 | -0.113822222 | 0.924136443 |
| -0.193566667 | -0.038166667 | -0.1139      | 0.924086623 |
| -0.0728      | -0.071266667 | -0.113911111 | 0.924079506 |
| -0.027233333 | -0.0252      | -0.113955556 | 0.924051039 |
| -0.006333333 | 0.011066667  | -0.113977778 | 0.924036806 |
| -0.008666667 | -0.076933333 | -0.113988889 | 0.924029689 |
| -0.143533333 | -0.143033333 | -0.113988889 | 0.924029689 |
| -0.0842      | -0.010133333 | -0.114       | 0.924022572 |
| -0.070066667 | -0.022733333 | -0.114011111 | 0.924015456 |
| 0.081433333  | 0.0177       | -0.114155556 | 0.923922947 |



|              |              |              |             |
|--------------|--------------|--------------|-------------|
| -0.035433333 | 0.046333333  | -0.114177778 | 0.923908716 |
| -0.0658      | -0.079933333 | -0.114211111 | 0.923887369 |
| -0.109633333 | -0.098833333 | -0.114211111 | 0.923887369 |
| -0.032733333 | -0.0193      | -0.114222222 | 0.923880254 |
| 0.2107       | 0.068466667  | -0.114222222 | 0.923880254 |
| -0.03        | 0.095833333  | -0.114288889 | 0.923837562 |
| -0.074233333 | -0.093766667 | -0.114411111 | 0.9237593   |
| -0.1828      | -0.123133333 | -0.114488889 | 0.9237095   |
| 0.045566667  | -0.0273      | -0.114488889 | 0.9237095   |
| -0.146733333 | -0.2085      | -0.114544444 | 0.92367393  |
| -0.3148      | -0.437033333 | -0.114544444 | 0.92367393  |
| -0.044566667 | 0.1592       | -0.114655556 | 0.923602795 |
| -0.163733333 | -0.094133333 | -0.114666667 | 0.923595682 |
| -0.015333333 | 0.018833333  | -0.114666667 | 0.923595682 |
| -0.0847      | -0.0406      | -0.1147      | 0.923574343 |
| -0.145666667 | -0.114533333 | -0.114711111 | 0.92356723  |
| -0.065633333 | -0.133833333 | -0.114766667 | 0.923531665 |
| -0.4006      | -0.2625      | -0.1148      | 0.923510328 |
| -0.113266667 | 0.0508       | -0.115233333 | 0.92323298  |
| 0.011566667  | 0.084933333  | -0.115255556 | 0.923218759 |
| -0.062133333 | -0.1404      | -0.115266667 | 0.923211649 |
| -0.1097      | 0.062166667  | -0.115277778 | 0.923204539 |
| -0.145333333 | -0.065633333 | -0.1154      | 0.92312633  |
| -0.026266667 | 0.0183       | -0.115411111 | 0.923119221 |
| 0.053666667  | -0.073566667 | -0.115522222 | 0.923048128 |
| 0.0361       | -0.2247      | -0.115566667 | 0.923019693 |
| 0.009833333  | 0.075266667  | -0.115611111 | 0.922991258 |
| 0.146266667  | -0.184633333 | -0.115644444 | 0.922969933 |
| -0.110166667 | 0.1113       | -0.115666667 | 0.922955716 |
| 0.052466667  | 0.001433333  | -0.115766667 | 0.922891744 |
| -0.0123      | 0.0281       | -0.115822222 | 0.922856206 |
| -0.0022      | -0.0827      | -0.115833333 | 0.922849098 |
| -0.155733333 | -0.1471      | -0.115966667 | 0.922763813 |
| -0.1158      | 0.062466667  | -0.115966667 | 0.922763813 |
| 0.142733333  | -0.023733333 | -0.1161      | 0.922678535 |
| -0.0479      | -0.1301      | -0.116144444 | 0.922650111 |
| -0.2401      | -0.0824      | -0.116144444 | 0.922650111 |
| -0.149533333 | -0.115366667 | -0.116488889 | 0.922429854 |
| -0.140366667 | -0.217266667 | -0.116522222 | 0.922408542 |
| -0.019833333 | -0.1909      | -0.116533333 | 0.922401438 |
| 0.216933333  | -0.7451      | -0.116566667 | 0.922380126 |
| -0.077166667 | -0.074066667 | -0.116677778 | 0.92230909  |
| -0.3193      | -0.105       | -0.116677778 | 0.92230909  |
| -0.2171      | 0.0353       | -0.116777778 | 0.922245163 |
| 0.037633333  | 0.076433333  | -0.116922222 | 0.922152831 |
| -0.111433333 | -0.189566667 | -0.116988889 | 0.92211022  |
| -0.1105      | -0.107866667 | -0.117044444 | 0.922074712 |

|              |              |              |             |
|--------------|--------------|--------------|-------------|
| -0.0891      | -0.1683      | -0.117111111 | 0.922032104 |
| -0.1194      | -0.045       | -0.117133333 | 0.922017901 |
| -0.0371      | -0.123166667 | -0.1172      | 0.921975296 |
| -0.008366667 | -0.083466667 | -0.117233333 | 0.921953994 |
| -0.100033333 | 0.0237       | -0.117333333 | 0.921890091 |
| -0.2769      | -0.058533333 | -0.117344444 | 0.921882991 |
| 0.0867       | 0.0012       | -0.117344444 | 0.921882991 |
| -0.043233333 | 0.0483       | -0.117522222 | 0.921769398 |
| 0.060966667  | 0.138966667  | -0.117566667 | 0.921741002 |
| -0.0169      | -0.011166667 | -0.117677778 | 0.921670016 |
| 0.009033333  | 0.145166667  | -0.117733333 | 0.921634525 |
| -0.065766667 | -0.062833333 | -0.117777778 | 0.921606133 |
| 0.0195       | 0.132766667  | -0.117788889 | 0.921599035 |
| -0.086066667 | -0.118833333 | -0.1178      | 0.921591937 |
| -0.060233333 | -0.094366667 | -0.117944444 | 0.921499671 |
| -0.052433333 | 0.034366667  | -0.117955556 | 0.921492574 |
| -0.081066667 | -0.2029      | -0.118077778 | 0.92141451  |
| 0.1057       | -0.081533333 | -0.118088889 | 0.921407414 |
| -0.012966667 | 0.044633333  | -0.1181      | 0.921400317 |
| -0.074833333 | 0.187033333  | -0.118188889 | 0.921343549 |
| 0.043433333  | -0.135166667 | -0.1182      | 0.921336453 |
| -0.075166667 | -0.023833333 | -0.118322222 | 0.921258403 |
| -0.0239      | -0.064733333 | -0.118344444 | 0.921244212 |
| 0.060833333  | -0.193466667 | -0.118488889 | 0.921151981 |
| 0.077066667  | 0.0095       | -0.118533333 | 0.921123604 |
| -0.167033333 | -0.124833333 | -0.118644444 | 0.921052665 |
| -0.198866667 | -0.223833333 | -0.118711111 | 0.921010104 |
| -0.110266667 | -0.184033333 | -0.118788889 | 0.920960452 |
| 0.112366667  | 0.055866667  | -0.118888889 | 0.920896619 |
| -0.238366667 | -0.253166667 | -0.119011111 | 0.920818605 |
| -0.071733333 | -0.0096      | -0.119033333 | 0.920804422 |
| -0.0775      | -0.022833333 | -0.1191      | 0.920761873 |
| 0.234966667  | -0.0029      | -0.1191      | 0.920761873 |
| -0.061533333 | -0.086766667 | -0.119122222 | 0.92074769  |
| -0.053733333 | 0.036933333  | -0.119122222 | 0.92074769  |
| -0.0027      | 0.0178       | -0.119133333 | 0.920740599 |
| -0.075533333 | 0.027166667  | -0.119188889 | 0.920705143 |
| -0.137766667 | -0.101166667 | -0.119277778 | 0.920648418 |
| -0.003833333 | 0.1298       | -0.119366667 | 0.920591695 |
| -0.062133333 | -0.1262      | -0.119377778 | 0.920584605 |
| -0.027766667 | -0.1032      | -0.1194      | 0.920570426 |
| 0.013233333  | -0.054433333 | -0.119433333 | 0.920549156 |
| -0.037033333 | 0.137333333  | -0.119511111 | 0.920499529 |
| 0.125        | 0.039166667  | -0.119533333 | 0.920485351 |
| -0.156533333 | -0.058633333 | -0.119622222 | 0.920428638 |
| 0.095266667  | 0.0444       | -0.119677778 | 0.920393195 |
| 0.082866667  | 0.063866667  | -0.1197      | 0.920379018 |

|              |              |              |             |
|--------------|--------------|--------------|-------------|
| 0.058333333  | -0.1106      | -0.119744444 | 0.920350665 |
| -0.313366667 | -0.071633333 | -0.119755556 | 0.920343577 |
| -0.1691      | -0.020033333 | -0.119755556 | 0.920343577 |
| 0.039533333  | 0.096433333  | -0.119811111 | 0.920308137 |
| -0.035366667 | -0.082733333 | -0.119844444 | 0.920286873 |
| -0.0317      | -0.1412      | -0.119877778 | 0.92026561  |
| -0.051366667 | -0.0834      | -0.119933333 | 0.920230173 |
| 0.1665       | 0.1891       | -0.119944444 | 0.920223086 |
| -0.270666667 | -0.343466667 | -0.119988889 | 0.920194738 |
| 0.0405       | 0.0063       | -0.120122222 | 0.920109697 |
| 0.117366667  | -0.017933333 | -0.120177778 | 0.920074266 |
| -0.0855      | -0.074233333 | -0.120266667 | 0.92001758  |
| 0.0968       | 0.0845       | -0.120488889 | 0.919875878 |
| -0.259733333 | -0.030866667 | -0.120544444 | 0.919840456 |
| -0.210433333 | -0.0954      | -0.120622222 | 0.919790867 |
| -0.303466667 | -0.085233333 | -0.120666667 | 0.919762532 |
| -0.038433333 | 0.054566667  | -0.1207      | 0.919741281 |
| -0.2488      | -0.3073      | -0.120811111 | 0.919670449 |
| -0.4424      | -0.3764      | -0.120844444 | 0.9196492   |
| 0.091166667  | 0.0958       | -0.120866667 | 0.919635035 |
| -0.0248      | -0.0487      | -0.1209      | 0.919613787 |
| 0.0682       | 0.097566667  | -0.120944444 | 0.919585457 |
| 0.040766667  | 0.013033333  | -0.120966667 | 0.919571293 |
| -0.002633333 | 0.036533333  | -0.121033333 | 0.9195288   |
| -0.1483      | -0.020133333 | -0.121055556 | 0.919514637 |
| -0.120133333 | -0.127366667 | -0.121088889 | 0.919493392 |
| -0.127966667 | -0.137033333 | -0.121255556 | 0.919387174 |
| -0.1472      | -0.069833333 | -0.1214      | 0.919295128 |
| -0.0465      | 0.0579       | -0.121511111 | 0.91922433  |
| -0.004433333 | 0.044        | -0.121622222 | 0.919153537 |
| -0.0637      | -0.0143      | -0.121688889 | 0.919111065 |
| -0.283866667 | -0.264133333 | -0.121777778 | 0.919054437 |
| -0.0027      | 0.167033333  | -0.121822222 | 0.919026125 |
| -0.006566667 | -0.105566667 | -0.121888889 | 0.918983658 |
| -0.0942      | -0.0124      | -0.122011111 | 0.918905806 |
| -0.170633333 | -0.217066667 | -0.122033333 | 0.918891652 |
| -0.157333333 | -0.104133333 | -0.122111111 | 0.918842115 |
| 0.002        | -0.025566667 | -0.122244444 | 0.9187572   |
| -0.054233333 | -0.033166667 | -0.122255556 | 0.918750124 |
| -0.082833333 | -0.080266667 | -0.1223      | 0.918721821 |
| 0.0063       | 0.0013       | -0.122344444 | 0.918693519 |
| -0.222766667 | -0.1295      | -0.122344444 | 0.918693519 |
| 0.011366667  | -0.1604      | -0.122366667 | 0.918679368 |
| -0.082866667 | -0.047066667 | -0.122544444 | 0.918566169 |
| -0.3582      | 0.027433333  | -0.122544444 | 0.918566169 |
| -0.2942      | -0.199166667 | -0.122655556 | 0.918495428 |
| -0.172033333 | -0.095666667 | -0.122733333 | 0.918445911 |

|              |              |              |             |
|--------------|--------------|--------------|-------------|
| 0.0402       | -0.0096      | -0.122744444 | 0.918438838 |
| 0.007633333  | -0.044433333 | -0.122988889 | 0.918283235 |
| 0.076733333  | -0.071666667 | -0.123022222 | 0.918262018 |
| -0.0297      | 0.008366667  | -0.123066667 | 0.918233373 |
| -0.202233333 | -0.1797      | -0.123322222 | 0.918071091 |
| -0.268333333 | -0.127733333 | -0.123355556 | 0.918049879 |
| -0.1938      | 0.036866667  | -0.123622222 | 0.917880203 |
| -0.2         | -0.045966667 | -0.123711111 | 0.917823651 |
| 0.1943       | 0.227333333  | -0.123833333 | 0.917745898 |
| -0.052566667 | -0.0682      | -0.123888889 | 0.917710558 |
| -0.122066667 | -0.114966667 | -0.123933333 | 0.917682287 |
| 0.130966667  | 0.055        | -0.123988889 | 0.91764695  |
| -0.012566667 | -0.213233333 | -0.124066667 | 0.917597479 |
| 0.163466667  | 0.0374       | -0.124066667 | 0.917597479 |
| -0.008633333 | -0.113033333 | -0.124233333 | 0.91749148  |
| 0.1226       | 0.030533333  | -0.124255556 | 0.917477348 |
| -0.2202      | -0.1649      | -0.124344444 | 0.917420821 |
| -0.146233333 | -0.101833333 | -0.124577778 | 0.917272455 |
| 0.042566667  | -0.057066667 | -0.124577778 | 0.917272455 |
| 0.077466667  | 0.1659       | -0.124744444 | 0.917166493 |
| -0.027666667 | 0.180433333  | -0.124755556 | 0.91715943  |
| 0.0332       | -0.1717      | -0.124977778 | 0.917018168 |
| -0.244233333 | -0.229666667 | -0.125033333 | 0.916982856 |
| -0.0708      | 0.023333333  | -0.125088889 | 0.916947545 |
| -0.045533333 | -0.070966667 | -0.1253      | 0.916813377 |
| 0.055        | -0.1182      | -0.125488889 | 0.916693349 |
| -0.061066667 | -0.172533333 | -0.125522222 | 0.916672169 |
| -0.0371      | 0.010666667  | -0.125533333 | 0.916665109 |
| -0.119233333 | -0.2915      | -0.125544444 | 0.916658049 |
| -0.174133333 | -0.217633333 | -0.125622222 | 0.916608632 |
| -0.1248      | -0.007233333 | -0.125655556 | 0.916587454 |
| 0.11         | 0.004733333  | -0.125711111 | 0.916552159 |
| -0.031933333 | 0.2235       | -0.125788889 | 0.916502748 |
| -0.0102      | -0.190466667 | -0.1258      | 0.916495689 |
| 0.044633333  | 0.009033333  | -0.126077778 | 0.916319243 |
| -0.067       | -0.0596      | -0.126133333 | 0.916283958 |
| -0.105766667 | -0.1387      | -0.126388889 | 0.916121664 |
| -0.049466667 | -0.010766667 | -0.1264      | 0.916114609 |
| -0.177733333 | -0.243233333 | -0.126455556 | 0.916079331 |
| -0.054066667 | 0.0085       | -0.126555556 | 0.916015836 |
| 0.072333333  | -0.0157      | -0.126733333 | 0.915902966 |
| -0.085933333 | -0.255066667 | -0.126788889 | 0.915867697 |
| -0.051266667 | -0.096366667 | -0.127011111 | 0.915726634 |
| 0.149266667  | 0.1669       | -0.127133333 | 0.915649059 |
| -0.048133333 | -0.0245      | -0.127144444 | 0.915642007 |
| -0.074033333 | -0.079666667 | -0.1273      | 0.915543285 |
| 0.031366667  | -0.089133333 | -0.127311111 | 0.915536234 |

|              |              |              |             |
|--------------|--------------|--------------|-------------|
| -0.140533333 | -0.178866667 | -0.127322222 | 0.915529182 |
| -0.0161      | -0.025466667 | -0.127322222 | 0.915529182 |
| -0.119066667 | -0.1524      | -0.127411111 | 0.915472776 |
| 0.042166667  | -0.019333333 | -0.127433333 | 0.915458674 |
| -0.148166667 | -0.153733333 | -0.127611111 | 0.915345873 |
| 0.002066667  | 0.0041       | -0.127644444 | 0.915324724 |
| -0.0718      | -0.0981      | -0.127755556 | 0.915254232 |
| -0.166633333 | -0.081533333 | -0.127777778 | 0.915240134 |
| -0.230066667 | -0.092833333 | -0.127777778 | 0.915240134 |
| -0.0267      | 0.0322       | -0.127866667 | 0.915183745 |
| -0.092166667 | -0.089366667 | -0.128022222 | 0.915085073 |
| 0.019566667  | 0.0559       | -0.128044444 | 0.915070978 |
| -0.0193      | 0.0853       | -0.128122222 | 0.915021646 |
| -0.097133333 | -0.250633333 | -0.128244444 | 0.914944131 |
| -0.227433333 | 0.084666667  | -0.128311111 | 0.914901852 |
| -0.0843      | 0.036666667  | -0.128355556 | 0.914873668 |
| -0.086533333 | -0.077266667 | -0.128444444 | 0.914817301 |
| -0.055666667 | -0.0634      | -0.128577778 | 0.914732758 |
| -0.1616      | -0.125166667 | -0.1287      | 0.914655267 |
| -0.064266667 | -0.139766667 | -0.128733333 | 0.914634134 |
| -0.147766667 | -0.105633333 | -0.128877778 | 0.914542564 |
| -0.0868      | -0.2312      | -0.128911111 | 0.914521434 |
| -0.266466667 | -0.317133333 | -0.128933333 | 0.914507348 |
| -0.0786      | -0.098133333 | -0.128933333 | 0.914507348 |
| -0.206833333 | -0.229066667 | -0.128966667 | 0.914486218 |
| -0.162933333 | -0.1756      | -0.1291      | 0.914401706 |
| -0.130966667 | -0.2156      | -0.129111111 | 0.914394663 |
| -0.158233333 | -0.211066667 | -0.1292      | 0.914338327 |
| -0.074533333 | -0.054666667 | -0.129322222 | 0.914260869 |
| -0.044566667 | -0.006433333 | -0.129366667 | 0.914232704 |
| -0.117733333 | 0.0413       | -0.129366667 | 0.914232704 |
| -0.0437      | -0.0308      | -0.1295      | 0.914148215 |
| -0.061533333 | 0.030166667  | -0.129622222 | 0.914070773 |
| 0.013333333  | -0.148733333 | -0.129622222 | 0.914070773 |
| -0.081033333 | -0.2394      | -0.129655556 | 0.914049654 |
| -0.116433333 | -0.063       | -0.1298      | 0.913958143 |
| 0.037466667  | -0.208133333 | -0.129855556 | 0.913922949 |
| 0.016733333  | 0.1458       | -0.129944444 | 0.913866641 |
| -0.097466667 | -0.1775      | -0.130011111 | 0.913824412 |
| -0.006633333 | 0.034233333  | -0.130033333 | 0.913810336 |
| -0.086433333 | -0.099133333 | -0.130133333 | 0.913746998 |
| -0.1826      | -0.1415      | -0.130144444 | 0.913739961 |
| -0.103366667 | 0.0423       | -0.130255556 | 0.913669591 |
| -0.254466667 | -0.103766667 | -0.130288889 | 0.913648481 |
| -0.054733333 | -0.042633333 | -0.1304      | 0.913578117 |
| -0.097333333 | -0.074933333 | -0.130444444 | 0.913549974 |
| -0.041366667 | -0.1701      | -0.130522222 | 0.913500724 |

|              |              |              |             |
|--------------|--------------|--------------|-------------|
| -0.21666667  | -0.1214      | -0.130544444 | 0.913486653 |
| -0.0755      | -0.115333333 | -0.130555556 | 0.913479618 |
| -0.243666667 | -0.1746      | -0.130633333 | 0.913430372 |
| -0.008466667 | -0.065966667 | -0.130688889 | 0.913395199 |
| 0.1537       | -0.016466667 | -0.1307      | 0.913388164 |
| 0.056766667  | 0.112033333  | -0.130722222 | 0.913374095 |
| 0.070166667  | 0.132166667  | -0.130744444 | 0.913360026 |
| -0.0797      | -0.0179      | -0.130766667 | 0.913345957 |
| -0.212266667 | -0.1237      | -0.1308      | 0.913324855 |
| 0.1393       | 0.1238       | -0.130922222 | 0.913247483 |
| 0.005333333  | -0.3152      | -0.130922222 | 0.913247483 |
| -0.144066667 | 0.071033333  | -0.130944444 | 0.913233416 |
| -0.045133333 | -0.2586      | -0.130988889 | 0.913205283 |
| -0.130533333 | 0.181333333  | -0.131022222 | 0.913184184 |
| -0.1285      | -0.096866667 | -0.131066667 | 0.913156052 |
| 0.0473       | 0.0024       | -0.131122222 | 0.913120889 |
| -0.1301      | -0.078266667 | -0.131133333 | 0.913113856 |
| -0.133533333 | -0.1197      | -0.131144444 | 0.913106824 |
| 0.017033333  | -0.187766667 | -0.131188889 | 0.913078695 |
| -0.032333333 | 0.0474       | -0.131355556 | 0.912973218 |
| -0.114866667 | -0.1402      | -0.131555556 | 0.912846662 |
| -0.0015      | 0.073666667  | -0.131688889 | 0.912762301 |
| -0.171666667 | -0.088033333 | -0.131822222 | 0.912677947 |
| 0.036633333  | 0.024566667  | -0.131911111 | 0.912621716 |
| 0.052766667  | 0.1518       | -0.131955556 | 0.912593602 |
| -0.0349      | 0.039133333  | -0.131988889 | 0.912572517 |
| -0.0944      | 0.017766667  | -0.132111111 | 0.912495209 |
| 0.092133333  | -0.072733333 | -0.132144444 | 0.912474126 |
| -0.027633333 | -0.002066667 | -0.1322      | 0.912438989 |
| -0.0053      | -0.0824      | -0.132233333 | 0.912417907 |
| 0.08         | 0.0194       | -0.1324      | 0.912312507 |
| -0.172833333 | -0.1733      | -0.132411111 | 0.91230548  |
| -0.1152      | -0.092366667 | -0.1325      | 0.912249272 |
| 0.0302       | -0.1047      | -0.132688889 | 0.912129841 |
| 0.052566667  | 0.1058       | -0.132822222 | 0.912045546 |
| 0.011633333  | 0.115766667  | -0.132833333 | 0.912038522 |
| -0.020433333 | -0.0797      | -0.132922222 | 0.91198233  |
| -0.056566667 | -0.063366667 | -0.132955556 | 0.911961259 |
| -0.096433333 | 0.055633333  | -0.133188889 | 0.911813776 |
| -0.034633333 | -0.118866667 | -0.133222222 | 0.911792709 |
| -0.063866667 | -0.070666667 | -0.133244444 | 0.911778664 |
| -0.341033333 | -0.202166667 | -0.133244444 | 0.911778664 |
| -0.095       | -0.179733333 | -0.133266667 | 0.91176462  |
| -0.0262      | -0.003266667 | -0.133344444 | 0.911715467 |
| 0.0464       | -0.1656      | -0.133444444 | 0.911652274 |
| 0.020033333  | 0.183166667  | -0.133611111 | 0.911546962 |
| -0.3149      | -0.126633333 | -0.133655556 | 0.91151888  |

|              |              |              |             |
|--------------|--------------|--------------|-------------|
| -0.055866667 | -0.024033333 | -0.133677778 | 0.91150484  |
| 0.0656       | -0.046133333 | -0.133744444 | 0.911462721 |
| -0.1542      | 0.058133333  | -0.134122222 | 0.91122408  |
| -0.102233333 | -0.117133333 | -0.1343      | 0.911111801 |
| -0.121233333 | -0.090266667 | -0.134322222 | 0.911097767 |
| -0.1685      | -0.194433333 | -0.1344      | 0.911048649 |
| 0.173333333  | -0.1125      | -0.134611111 | 0.910915344 |
| -0.048633333 | 0.056566667  | -0.134833333 | 0.910775044 |
| 0.123066667  | 0.1635       | -0.134855556 | 0.910761016 |
| -0.0837      | -0.1579      | -0.134866667 | 0.910754001 |
| -0.102033333 | 0.0567       | -0.134933333 | 0.910711916 |
| 0.071633333  | -0.112433333 | -0.135111111 | 0.9105997   |
| -0.1047      | -0.340966667 | -0.135188889 | 0.910550609 |
| -0.071033333 | -0.109166667 | -0.135211111 | 0.910536584 |
| -0.249433333 | -0.218666667 | -0.135277778 | 0.910494509 |
| -0.077233333 | -0.113533333 | -0.135566667 | 0.910312208 |
| -0.140666667 | -0.062466667 | -0.1356      | 0.910291175 |
| -0.1469      | -0.056866667 | -0.135611111 | 0.910284165 |
| -0.304833333 | -0.3592      | -0.1358      | 0.910164991 |
| -0.037433333 | 0.068966667  | -0.135811111 | 0.910157981 |
| -0.058866667 | -0.0177      | -0.135844444 | 0.910136952 |
| -0.0546      | 0.0233       | -0.135844444 | 0.910136952 |
| -0.1744      | -0.256066667 | -0.136111111 | 0.909968739 |
| -0.228366667 | -0.118066667 | -0.136111111 | 0.909968739 |
| -0.0352      | 0.087566667  | -0.136211111 | 0.909905667 |
| -0.0797      | -0.110733333 | -0.136233333 | 0.909891651 |
| 0.003033333  | -0.089033333 | -0.1363      | 0.909849607 |
| -0.147233333 | -0.230666667 | -0.136422222 | 0.909772529 |
| -0.1679      | -0.0728      | -0.136444444 | 0.909758516 |
| -0.054633333 | -0.178366667 | -0.136455556 | 0.909751509 |
| -0.070433333 | -0.209433333 | -0.1366      | 0.909660428 |
| -0.020566667 | 0.0089       | -0.1366      | 0.909660428 |
| 0.005933333  | -0.083833333 | -0.136711111 | 0.909590372 |
| 0.125366667  | 0.167466667  | -0.136755556 | 0.909562351 |
| -0.011033333 | -0.129966667 | -0.136822222 | 0.909520322 |
| -0.3202      | -0.344533333 | -0.137177778 | 0.909296196 |
| 0.062333333  | 0.217166667  | -0.137188889 | 0.909289193 |
| -0.049866667 | 0.162966667  | -0.137222222 | 0.909268184 |
| -0.1599      | -0.3602      | -0.137344444 | 0.909191156 |
| -0.2061      | -0.0417      | -0.137444444 | 0.909128138 |
| -0.085133333 | -0.060833333 | -0.1375      | 0.90909313  |
| -0.125833333 | -0.207666667 | -0.1376      | 0.909030118 |
| -0.1462      | -0.1863      | -0.137633333 | 0.909009115 |
| -0.174766667 | -0.0105      | -0.137677778 | 0.908981112 |
| 0.067566667  | 0.0853       | -0.1377      | 0.908967111 |
| -0.024033333 | -0.035433333 | -0.137777778 | 0.908918109 |
| -0.062433333 | -0.079933333 | -0.137855556 | 0.908869109 |

|              |              |              |             |
|--------------|--------------|--------------|-------------|
| -0.062566667 | -0.093133333 | -0.138066667 | 0.908736123 |
| -0.038933333 | 0.087066667  | -0.138066667 | 0.908736123 |
| -0.090633333 | -0.0099      | -0.138222222 | 0.908638146 |
| -0.132433333 | 0.055933333  | -0.138355556 | 0.908554174 |
| -0.088866667 | -0.070066667 | -0.138522222 | 0.908449219 |
| 0.019366667  | 0.066333333  | -0.138555556 | 0.90842823  |
| -0.273       | -0.018633333 | -0.1386      | 0.908400245 |
| 0.000466667  | -0.035133333 | -0.138711111 | 0.908330286 |
| -0.067933333 | -0.165966667 | -0.138722222 | 0.90832329  |
| -0.108833333 | -0.119666667 | -0.138755556 | 0.908302304 |
| -0.1402      | -0.047533333 | -0.138922222 | 0.908197379 |
| -0.005166667 | -0.0472      | -0.139077778 | 0.908099459 |
| 0.0384       | 0.023966667  | -0.139188889 | 0.908029524 |
| 0.195433333  | -0.1512      | -0.139188889 | 0.908029524 |
| -0.018433333 | -0.013633333 | -0.139388889 | 0.907903653 |
| 0.026633333  | -0.090066667 | -0.139611111 | 0.907763817 |
| -0.1224      | -0.208133333 | -0.139733333 | 0.907686916 |
| -0.048333333 | 0.097366667  | -0.139866667 | 0.907603032 |
| -0.005766667 | 0.084166667  | -0.139966667 | 0.907540124 |
| 0.070266667  | -0.175966667 | -0.140211111 | 0.907386367 |
| -0.124333333 | -0.0481      | -0.140333333 | 0.907309498 |
| 0.087733333  | -0.0266      | -0.140377778 | 0.907281547 |
| 0.0199       | -0.1447      | -0.140455556 | 0.907232636 |
| -0.084866667 | -0.122266667 | -0.140488889 | 0.907211675 |
| -0.058033333 | -0.196233333 | -0.140533333 | 0.907183727 |
| -0.319633333 | -0.257066667 | -0.140544444 | 0.90717674  |
| 0.0628       | -0.059466667 | -0.140655556 | 0.907106875 |
| 0.121733333  | 0.004433333  | -0.140744444 | 0.907050988 |
| -0.115233333 | -0.113266667 | -0.140777778 | 0.90703003  |
| -0.2558      | -0.1074      | -0.141122222 | 0.906813502 |
| -0.053233333 | -0.199433333 | -0.141344444 | 0.906673834 |
| -0.043333333 | -0.040233333 | -0.141422222 | 0.906624955 |
| -0.030466667 | -0.0976      | -0.141444444 | 0.90661099  |
| -0.116233333 | -0.141466667 | -0.141744444 | 0.906422486 |
| 0.006333333  | -0.112966667 | -0.141844444 | 0.906359659 |
| -0.103633333 | 0.194233333  | -0.141866667 | 0.906345699 |
| 0.0616       | -0.056366667 | -0.142       | 0.906261938 |
| 0.028766667  | -0.0081      | -0.142022222 | 0.906247979 |
| -0.1703      | -0.0652      | -0.142155556 | 0.906164228 |
| -0.065433333 | -0.0992      | -0.142233333 | 0.906115376 |
| -0.135766667 | 0.0322       | -0.142344444 | 0.906045593 |
| -0.097       | 0.003066667  | -0.142477778 | 0.905961861 |
| -0.0636      | 0.001233333  | -0.142711111 | 0.905815348 |
| -0.065266667 | 0.059933333  | -0.142777778 | 0.905773491 |
| 0.150033333  | 0.111866667  | -0.142877778 | 0.90571071  |
| -0.117533333 | -0.380666667 | -0.142877778 | 0.90571071  |
| -0.022766667 | -0.091433333 | -0.142922222 | 0.905682808 |



|              |              |              |             |
|--------------|--------------|--------------|-------------|
| -0.183233333 | -0.152733333 | -0.142955556 | 0.905661883 |
| 0.041266667  | 0.157933333  | -0.142966667 | 0.905654908 |
| -0.0531      | -0.147633333 | -0.143133333 | 0.905550289 |
| -0.047666667 | 0.0135       | -0.1432      | 0.905508444 |
| 0.022533333  | -0.1524      | -0.143322222 | 0.905431735 |
| -0.2302      | -0.173133333 | -0.143533333 | 0.905299251 |
| 0.276566667  | -0.0679      | -0.143622222 | 0.905243475 |
| -0.2012      | -0.049666667 | -0.143622222 | 0.905243475 |
| 0.243833333  | 0.2052       | -0.143733333 | 0.905173759 |
| -0.038633333 | -0.0549      | -0.143755556 | 0.905159817 |
| -0.1247      | -0.0997      | -0.143822222 | 0.90511799  |
| -0.115233333 | 0.002633333  | -0.143844444 | 0.905104049 |
| -0.061166667 | -0.204433333 | -0.1439      | 0.905069195 |
| 0.0088       | 0.124233333  | -0.143933333 | 0.905048284 |
| -0.238566667 | 0.062333333  | -0.143933333 | 0.905048284 |
| -0.285033333 | -0.236833333 | -0.143966667 | 0.905027373 |
| -0.128833333 | -0.0012      | -0.144       | 0.905006463 |
| -0.052966667 | -0.1164      | -0.144188889 | 0.90488798  |
| -0.0942      | -0.267333333 | -0.144366667 | 0.904776481 |
| -0.036966667 | -0.1474      | -0.144377778 | 0.904769513 |
| -0.187366667 | 0.069966667  | -0.144422222 | 0.904741641 |
| -0.129033333 | -0.157766667 | -0.144444444 | 0.904727705 |
| -0.0605      | -0.030933333 | -0.144455556 | 0.904720737 |
| -0.1572      | 0.021433333  | -0.144544444 | 0.904664996 |
| -0.130466667 | -0.196366667 | -0.144566667 | 0.904651061 |
| -0.121466667 | -0.322       | -0.144577778 | 0.904644094 |
| 0.019333333  | -0.011966667 | -0.144666667 | 0.904588358 |
| -0.096       | -0.1777      | -0.144766667 | 0.904525659 |
| 0.0387       | 0.013933333  | -0.144844444 | 0.904476896 |
| 0.002066667  | -0.1171      | -0.144855556 | 0.90446993  |
| -0.039666667 | 0.052666667  | -0.145011111 | 0.904372412 |
| -0.493233333 | -0.529166667 | -0.145033333 | 0.904358482 |
| -0.0432      | -0.005433333 | -0.145122222 | 0.904302764 |
| -0.023733333 | -0.094433333 | -0.145133333 | 0.904295799 |
| 0.134433333  | -0.161333333 | -0.145155556 | 0.90428187  |
| -0.104366667 | -0.042766667 | -0.145177778 | 0.904267941 |
| -0.070133333 | -0.034533333 | -0.145244444 | 0.904226156 |
| 0.014133333  | -0.06        | -0.145355556 | 0.904156519 |
| -0.0817      | -0.018333333 | -0.145366667 | 0.904149555 |
| 0.068466667  | 0.015366667  | -0.145488889 | 0.904072961 |
| -0.233666667 | -0.004033333 | -0.145511111 | 0.904059035 |
| 0.003466667  | -0.0789      | -0.145522222 | 0.904052072 |
| -0.1035      | -0.166533333 | -0.145588889 | 0.904010297 |
| 0.107466667  | -0.0073      | -0.146055556 | 0.903717926 |
| -0.204833333 | -0.286933333 | -0.146077778 | 0.903704005 |
| -0.171466667 | -0.343866667 | -0.146088889 | 0.903697045 |
| 0.013633333  | 0.113933333  | -0.146222222 | 0.90361353  |

|              |              |              |             |
|--------------|--------------|--------------|-------------|
| -0.026433333 | -0.1445      | -0.146455556 | 0.903467396 |
| -0.111533333 | -0.1013      | -0.146544444 | 0.903411733 |
| -0.157166667 | -0.003033333 | -0.146544444 | 0.903411733 |
| -0.298666667 | -0.302533333 | -0.147066667 | 0.903084778 |
| -0.284766667 | -0.076933333 | -0.147266667 | 0.902959592 |
| -0.038833333 | -0.017633333 | -0.147677778 | 0.902702321 |
| -0.118266667 | -0.0384      | -0.147888889 | 0.902570237 |
| -0.113933333 | -0.209766667 | -0.147933333 | 0.902542433 |
| -0.001166667 | -0.0932      | -0.147988889 | 0.902507678 |
| -0.0277      | -0.710366667 | -0.148177778 | 0.902389523 |
| -0.1623      | 0.102466667  | -0.148255556 | 0.902340875 |
| -0.0476      | -0.045833333 | -0.148277778 | 0.902326976 |
| -0.141033333 | -0.1835      | -0.148311111 | 0.902306128 |
| -0.198666667 | -0.067566667 | -0.148333333 | 0.90229223  |
| -0.041433333 | -0.065566667 | -0.148344444 | 0.902285281 |
| 0.085733333  | 0.098466667  | -0.148522222 | 0.902174102 |
| -0.118266667 | -0.065133333 | -0.148644444 | 0.902097675 |
| 0.021233333  | -0.249366667 | -0.148655556 | 0.902090727 |
| -0.187733333 | -0.280966667 | -0.148766667 | 0.902021254 |
| -0.281033333 | -0.186566667 | -0.1488      | 0.902000414 |
| -0.0165      | -0.0554      | -0.148811111 | 0.901993467 |
| -0.014833333 | -0.036366667 | -0.148888889 | 0.90194484  |
| -0.1367      | -0.139666667 | -0.149011111 | 0.901868432 |
| -0.098166667 | -0.091066667 | -0.149077778 | 0.901826758 |
| 0.0732       | -0.309266667 | -0.149266667 | 0.901708692 |
| -0.194233333 | 0.080766667  | -0.149744444 | 0.901410122 |
| -0.1014      | -0.005066667 | -0.149811111 | 0.901368469 |
| -0.054233333 | -0.091866667 | -0.149833333 | 0.901354585 |
| -0.1856      | -0.172466667 | -0.149855556 | 0.901340701 |
| -0.2169      | -0.212133333 | -0.149944444 | 0.901285169 |
| -0.0757      | -0.094766667 | -0.150122222 | 0.901174114 |
| 0.107866667  | 0.127933333  | -0.150166667 | 0.901146352 |
| -0.1258      | -0.095333333 | -0.150188889 | 0.901132472 |
| -0.0617      | 0.069533333  | -0.150211111 | 0.901118591 |
| -0.109433333 | -0.2857      | -0.150333333 | 0.901042254 |
| 0.038433333  | -0.006466667 | -0.150466667 | 0.900958983 |
| 0.0099       | -0.006633333 | -0.150522222 | 0.90092429  |
| -0.259933333 | -0.2145      | -0.150611111 | 0.900868783 |
| 0.111266667  | 0.0006       | -0.150622222 | 0.900861845 |
| 0.0369       | 0.0894       | -0.150677778 | 0.900827155 |
| -0.003333333 | 0.021833333  | -0.150744444 | 0.900785529 |
| -0.262233333 | -0.021033333 | -0.150755556 | 0.900778591 |
| -0.012566667 | -0.031133333 | -0.150777778 | 0.900764716 |
| 0.009866667  | 0.095866667  | -0.150822222 | 0.900736967 |
| 0.157833333  | -0.164766667 | -0.150877778 | 0.900702282 |
| 0.067866667  | -0.0618      | -0.150888889 | 0.900695345 |
| -0.1346      | -0.054       | -0.150977778 | 0.900639853 |

|              |              |              |             |
|--------------|--------------|--------------|-------------|
| -0.095266667 | -0.0454      | -0.151133333 | 0.900542748 |
| -0.115633333 | -0.013633333 | -0.151166667 | 0.900521941 |
| -0.1908      | -0.070866667 | -0.151277778 | 0.900452589 |
| -0.050766667 | -0.012566667 | -0.151488889 | 0.900320835 |
| -0.0852      | -0.155033333 | -0.1515      | 0.900313901 |
| -0.632333333 | -0.533166667 | -0.151522222 | 0.900300033 |
| 0.027633333  | 0.0367       | -0.151611111 | 0.900244565 |
| -0.126133333 | -0.185666667 | -0.151711111 | 0.900182166 |
| 0.031833333  | 0.040833333  | -0.1518      | 0.900126705 |
| -0.0764      | -0.0651      | -0.151911111 | 0.900057383 |
| -0.1336      | -0.0515      | -0.152022222 | 0.899988067 |
| -0.150633333 | -0.1439      | -0.152144444 | 0.899911825 |
| -0.297366667 | -0.009833333 | -0.152211111 | 0.899870241 |
| -0.206066667 | -0.299433333 | -0.152255556 | 0.89984252  |
| 0.006866667  | -0.084566667 | -0.152388889 | 0.89975936  |
| -0.1087      | -0.0435      | -0.1524      | 0.899752431 |
| 0.0915       | 0.110833333  | -0.1524      | 0.899752431 |
| -0.141866667 | -0.0479      | -0.152422222 | 0.899738572 |
| -0.130533333 | -0.077866667 | -0.152433333 | 0.899731642 |
| 0.0614       | 0.056333333  | -0.152433333 | 0.899731642 |
| 0.0627       | -0.035033333 | -0.152477778 | 0.899703925 |
| 0.206133333  | 0.106833333  | -0.152488889 | 0.899696996 |
| 0.0637       | 0.0119       | -0.152522222 | 0.899676209 |
| 0.016866667  | 0.160033333  | -0.152666667 | 0.899586137 |
| -0.169866667 | -0.002133333 | -0.152688889 | 0.89957228  |
| -0.050233333 | -0.004966667 | -0.152744444 | 0.89953764  |
| -0.163666667 | -0.110066667 | -0.152855556 | 0.899468364 |
| -0.0164      | 0.070933333  | -0.152866667 | 0.899461436 |
| -0.155466667 | -0.036833333 | -0.152944444 | 0.899412946 |
| -0.032266667 | -0.042333333 | -0.153033333 | 0.899357532 |
| -0.086466667 | -0.204533333 | -0.153155556 | 0.899281344 |
| -0.1427      | -0.164533333 | -0.153344444 | 0.899163611 |
| -0.1798      | -0.144033333 | -0.153355556 | 0.899156686 |
| -0.1459      | -0.144933333 | -0.153433333 | 0.899108212 |
| -0.063733333 | -0.021433333 | -0.153511111 | 0.899059741 |
| -0.162133333 | -0.2203      | -0.153733333 | 0.898921267 |
| -0.242233333 | -0.170966667 | -0.153922222 | 0.898803581 |
| -0.131033333 | -0.069566667 | -0.154144444 | 0.898665147 |
| -0.189266667 | -0.162166667 | -0.154211111 | 0.89862362  |
| 0.002333333  | -0.001433333 | -0.154333333 | 0.898547494 |
| -0.133466667 | 0.059533333  | -0.154377778 | 0.898519813 |
| -0.122966667 | 0.102        | -0.154466667 | 0.898464454 |
| -0.028366667 | -0.054533333 | -0.154544444 | 0.898416018 |
| 0.0375       | -0.059566667 | -0.154566667 | 0.89840218  |
| 0.002466667  | -0.1951      | -0.154577778 | 0.898395261 |
| 0.114633333  | -0.019       | -0.154855556 | 0.8982223   |
| -0.064866667 | -0.216966667 | -0.154955556 | 0.898160042 |

|              |              |              |             |
|--------------|--------------|--------------|-------------|
| -0.160433333 | -0.095366667 | -0.154988889 | 0.89813929  |
| -0.1086      | -0.121733333 | -0.155       | 0.898132373 |
| -0.329666667 | -0.0411      | -0.155033333 | 0.898111622 |
| -0.128666667 | 0.008266667  | -0.155122222 | 0.898056288 |
| -0.0758      | -0.0196      | -0.155144444 | 0.898042455 |
| -0.156033333 | -0.097233333 | -0.155166667 | 0.898028623 |
| -0.102633333 | -0.146666667 | -0.155177778 | 0.898021706 |
| -0.0263      | -0.111733333 | -0.155188889 | 0.89801479  |
| -0.133733333 | -0.0725      | -0.155222222 | 0.897994042 |
| -0.188833333 | -0.095466667 | -0.155244444 | 0.89798021  |
| 0.009233333  | 0.047466667  | -0.155388889 | 0.897890307 |
| -0.1324      | -0.151566667 | -0.155444444 | 0.897855732 |
| 0.082833333  | 0.063066667  | -0.155622222 | 0.897745099 |
| -0.002566667 | -0.033433333 | -0.155666667 | 0.897717443 |
| -0.150133333 | -0.031066667 | -0.1558      | 0.897634481 |
| -0.2417      | -0.209166667 | -0.155955556 | 0.8975377   |
| 0.021966667  | -0.178833333 | -0.155977778 | 0.897523875 |
| 0.015633333  | 0.0347       | -0.156077778 | 0.897461666 |
| -0.229966667 | 0.0066       | -0.156111111 | 0.89744093  |
| 0.0363       | -0.113166667 | -0.156122222 | 0.897434019 |
| -0.146766667 | -0.058566667 | -0.156133333 | 0.897427107 |
| -0.228266667 | -0.0074      | -0.156255556 | 0.897351082 |
| -0.077133333 | -0.120766667 | -0.156455556 | 0.897226691 |
| 0.188066667  | -0.026166667 | -0.156511111 | 0.897192141 |
| -0.037366667 | -0.066266667 | -0.156644444 | 0.897109227 |
| -0.136566667 | -0.0534      | -0.156855556 | 0.896977962 |
| -0.0908      | -0.060766667 | -0.156977778 | 0.896901975 |
| -0.034966667 | 0.036166667  | -0.157077778 | 0.896839808 |
| -0.1047      | 0.062766667  | -0.157077778 | 0.896839808 |
| -0.022766667 | -0.046833333 | -0.157122222 | 0.89681218  |
| -0.168433333 | -0.2647      | -0.1572      | 0.896763833 |
| -0.1144      | 0.110366667  | -0.157211111 | 0.896756927 |
| -0.2052      | -0.297466667 | -0.157222222 | 0.89675002  |
| -0.075866667 | 0.0436       | -0.157288889 | 0.896708582 |
| 0.121633333  | -0.105566667 | -0.157288889 | 0.896708582 |
| 0.164533333  | 0.135066667  | -0.157433333 | 0.896618807 |
| -0.1354      | -0.029066667 | -0.1576      | 0.896515232 |
| -0.1289      | -0.1452      | -0.157655556 | 0.896480709 |
| -0.071033333 | -0.188233333 | -0.157711111 | 0.896446188 |
| -0.0424      | 0.0034       | -0.157788889 | 0.896397861 |
| -0.138166667 | 0.014966667  | -0.157933333 | 0.896308117 |
| -0.228666667 | -0.1334      | -0.157955556 | 0.896294311 |
| -0.0153      | -0.069666667 | -0.157955556 | 0.896294311 |
| -0.0754      | 0.076666667  | -0.158233333 | 0.896121754 |
| -0.0077      | 0.021633333  | -0.158244444 | 0.896114853 |
| -0.128333333 | -0.043033333 | -0.158244444 | 0.896114853 |
| -0.086733333 | -0.220766667 | -0.158333333 | 0.896059642 |

|              |              |              |             |
|--------------|--------------|--------------|-------------|
| -0.035566667 | -0.1754      | -0.158366667 | 0.896038939 |
| 0.126        | 0.044666667  | -0.158466667 | 0.895976832 |
| -0.047066667 | -0.019966667 | -0.158466667 | 0.895976832 |
| 0.1192       | 0.020266667  | -0.1585      | 0.895956131 |
| -0.200066667 | -0.090166667 | -0.158533333 | 0.89593543  |
| -0.252066667 | -0.1884      | -0.158666667 | 0.895852632 |
| -0.2557      | -0.094433333 | -0.158677778 | 0.895845733 |
| -0.159533333 | -0.137666667 | -0.158733333 | 0.895811236 |
| -0.0555      | 0.0619       | -0.158733333 | 0.895811236 |
| -0.136       | -0.202266667 | -0.158733333 | 0.895811236 |
| -0.258933333 | -0.211566667 | -0.158755556 | 0.895797438 |
| -0.1107      | -0.0059      | -0.158766667 | 0.895790538 |
| -0.007566667 | -0.230233333 | -0.158877778 | 0.895721551 |
| -0.171166667 | -0.1128      | -0.158888889 | 0.895714652 |
| -0.062633333 | -0.0135      | -0.158911111 | 0.895700855 |
| -0.075933333 | -0.0403      | -0.159133333 | 0.895562899 |
| -0.019833333 | -0.213033333 | -0.159166667 | 0.895542207 |
| -0.1078      | -0.159566667 | -0.159288889 | 0.895466342 |
| 0.0251       | 0.0593       | -0.159411111 | 0.895390483 |
| -0.0821      | -0.128266667 | -0.159566667 | 0.895293944 |
| -0.077933333 | 0.087566667  | -0.159611111 | 0.895266364 |
| -0.068466667 | -0.067533333 | -0.159966667 | 0.895045751 |
| 0.216066667  | -0.067866667 | -0.160111111 | 0.894956142 |
| 0.005933333  | 0.061533333  | -0.160188889 | 0.894907895 |
| -0.019933333 | 0.145466667  | -0.1603      | 0.894838975 |
| -0.018333333 | -0.102733333 | -0.160322222 | 0.894825192 |
| -0.030333333 | -0.041566667 | -0.160355556 | 0.894804517 |
| -0.2179      | -0.0899      | -0.160366667 | 0.894797626 |
| -0.066       | -0.062966667 | -0.160466667 | 0.894735605 |
| -0.074366667 | 0.0038       | -0.160522222 | 0.894701151 |
| -0.1591      | -0.302466667 | -0.160577778 | 0.894666699 |
| -0.052233333 | -0.069166667 | -0.160611111 | 0.894646028 |
| -0.043433333 | 0.0593       | -0.160633333 | 0.894632247 |
| -0.035933333 | -0.079533333 | -0.160733333 | 0.894570238 |
| -0.3765      | -0.304533333 | -0.161144444 | 0.894315357 |
| 0.077633333  | 0.130633333  | -0.161144444 | 0.894315357 |
| 0.123933333  | -0.1666      | -0.1612      | 0.89428092  |
| -0.1862      | -0.278166667 | -0.161211111 | 0.894274032 |
| -0.073266667 | -0.071766667 | -0.161266667 | 0.894239596 |
| 0.005933333  | -0.0735      | -0.1613      | 0.894218935 |
| -0.189933333 | -0.124433333 | -0.1614      | 0.894156954 |
| 0.0344       | 0.047033333  | -0.161444444 | 0.894129409 |
| -0.072766667 | -0.0476      | -0.161588889 | 0.894039892 |
| -0.182066667 | -0.095166667 | -0.161588889 | 0.894039892 |
| -0.4211      | -0.2424      | -0.161633333 | 0.89401235  |
| -0.118433333 | -0.2719      | -0.161666667 | 0.893991694 |
| -0.041566667 | 0.102366667  | -0.161766667 | 0.89392973  |

|              |              |              |             |
|--------------|--------------|--------------|-------------|
| -0.0763      | 0.103533333  | -0.161822222 | 0.893895307 |
| -0.045066667 | -0.2618      | -0.162011111 | 0.893778279 |
| 0.005533333  | -0.160333333 | -0.162077778 | 0.893736978 |
| 0.1023       | -0.0076      | -0.162144444 | 0.89369568  |
| -0.098266667 | 0.043433333  | -0.162177778 | 0.893675031 |
| -0.031933333 | 0.002866667  | -0.162288889 | 0.893606206 |
| -0.0447      | -0.264366667 | -0.162577778 | 0.893427286 |
| -0.069466667 | -0.160866667 | -0.162655556 | 0.893379122 |
| -0.081133333 | -0.005233333 | -0.162677778 | 0.893365361 |
| -0.2219      | -0.313866667 | -0.162677778 | 0.893365361 |
| 0.100833333  | -0.228533333 | -0.1627      | 0.8933516   |
| -0.2568      | -0.297333333 | -0.162722222 | 0.89333784  |
| -0.023566667 | -0.003366667 | -0.162733333 | 0.89333096  |
| -0.1733      | -0.0678      | -0.162755556 | 0.8933172   |
| -0.227533333 | -0.128966667 | -0.1628      | 0.89328968  |
| 0.014233333  | -0.1878      | -0.162888889 | 0.893234643 |
| -0.038866667 | -0.1042      | -0.162888889 | 0.893234643 |
| -0.144433333 | 0.091433333  | -0.162955556 | 0.893193368 |
| 0.026533333  | -0.148133333 | -0.163011111 | 0.893158974 |
| -0.0137      | 0.0627       | -0.163044444 | 0.893138337 |
| -0.1786      | -0.255633333 | -0.163266667 | 0.893000776 |
| -0.1226      | -0.000966667 | -0.163277778 | 0.892993898 |
| -0.124266667 | -0.102       | -0.163388889 | 0.892925125 |
| -0.0802      | -0.1412      | -0.163555556 | 0.892821977 |
| 0.018633333  | -0.123       | -0.163588889 | 0.892801348 |
| -0.1806      | -0.0445      | -0.163611111 | 0.892787596 |
| -0.213533333 | -0.117266667 | -0.163677778 | 0.892746342 |
| -0.125033333 | 0.020266667  | -0.163766667 | 0.892691339 |
| -0.138233333 | -0.119133333 | -0.163777778 | 0.892684463 |
| -0.2464      | -0.286566667 | -0.163877778 | 0.892622589 |
| -0.0658      | -0.136866667 | -0.163911111 | 0.892601966 |
| -0.219466667 | -0.111333333 | -0.164011111 | 0.892540097 |
| 0.026266667  | 0.109        | -0.164022222 | 0.892533223 |
| -0.084233333 | -0.088566667 | -0.1641      | 0.892485107 |
| -0.097466667 | -0.2137      | -0.164155556 | 0.89245074  |
| -0.055133333 | -0.012933333 | -0.164233333 | 0.892402628 |
| -0.139733333 | -0.237266667 | -0.164511111 | 0.89223082  |
| 0.1455       | 0.114266667  | -0.164511111 | 0.89223082  |
| -0.303966667 | -0.169133333 | -0.164777778 | 0.892065916 |
| -0.232333333 | -0.1311      | -0.1649      | 0.891990345 |
| -0.088366667 | -0.031933333 | -0.164933333 | 0.891969736 |
| -0.218366667 | -0.0736      | -0.164955556 | 0.891955997 |
| 0.139366667  | -0.0261      | -0.165144444 | 0.891839223 |
| 0.0102       | -0.098833333 | -0.165211111 | 0.891798012 |
| 0.001933333  | -0.131233333 | -0.165366667 | 0.891701861 |
| -0.116766667 | -0.2611      | -0.165655556 | 0.891523322 |
| -0.254733333 | -0.0654      | -0.165733333 | 0.89147526  |

|              |              |              |             |
|--------------|--------------|--------------|-------------|
| -0.155133333 | -0.082033333 | -0.165844444 | 0.891406605 |
| -0.136833333 | -0.040666667 | -0.166011111 | 0.891303631 |
| 0.134233333  | -0.118133333 | -0.166111111 | 0.891241853 |
| -0.2172      | -0.151833333 | -0.166144444 | 0.891221261 |
| -0.082166667 | 0.012633333  | -0.166188889 | 0.891193806 |
| -0.095366667 | 0.025866667  | -0.166288889 | 0.891132036 |
| -0.109933333 | -0.221       | -0.166422222 | 0.891049681 |
| 0.1379       | 0.1443       | -0.166544444 | 0.890974196 |
| 0.097966667  | 0.066566667  | -0.166622222 | 0.890926164 |
| -0.107666667 | 0.0096       | -0.166655556 | 0.89090558  |
| 0.055333333  | 0.081833333  | -0.166711111 | 0.890871273 |
| -0.110166667 | -0.284766667 | -0.166722222 | 0.890864412 |
| -0.1313      | -0.237966667 | -0.166844444 | 0.890788943 |
| -0.2144      | -0.423066667 | -0.167355556 | 0.890473414 |
| -0.290333333 | -0.065066667 | -0.167455556 | 0.890411694 |
| 0.0042       | -0.0892      | -0.167466667 | 0.890404836 |
| 0.0287       | 0.032133333  | -0.167666667 | 0.890281408 |
| -0.0213      | -0.217833333 | -0.167677778 | 0.890274552 |
| -0.378866667 | -0.2875      | -0.1677      | 0.890260839 |
| 0.004066667  | -0.1523      | -0.167766667 | 0.890219701 |
| -0.0303      | -0.145466667 | -0.167766667 | 0.890219701 |
| -0.043       | -0.1216      | -0.167844444 | 0.890171709 |
| -0.120666667 | -0.2272      | -0.167855556 | 0.890164853 |
| -0.245066667 | -0.105533333 | -0.167866667 | 0.890157998 |
| 0.236466667  | 0.251333333  | -0.167922222 | 0.89012372  |
| -0.095833333 | -0.235733333 | -0.167944444 | 0.890110009 |
| -0.2224      | -0.181233333 | -0.168088889 | 0.890020895 |
| -0.169433333 | -0.319866667 | -0.168122222 | 0.890000331 |
| -0.017733333 | -0.2286      | -0.168222222 | 0.889938643 |
| 0.217566667  | -0.022166667 | -0.1683      | 0.889890666 |
| -0.2543      | 0.035266667  | -0.168411111 | 0.889822133 |
| -0.164666667 | -0.0896      | -0.168466667 | 0.889787868 |
| -0.2939      | -0.1886      | -0.168577778 | 0.889719343 |
| -0.107066667 | -0.040933333 | -0.168655556 | 0.889671378 |
| 0.031466667  | -0.053066667 | -0.168833333 | 0.889561754 |
| -0.249766667 | -0.260666667 | -0.168833333 | 0.889561754 |
| -0.253366667 | -0.254266667 | -0.168877778 | 0.88953435  |
| -0.3573      | -0.196066667 | -0.169222222 | 0.889321998 |
| 0.3131       | 0.1736       | -0.169266667 | 0.889294602 |
| -0.188333333 | -0.211433333 | -0.1694      | 0.889212417 |
| 0.139766667  | 0.242033333  | -0.169455556 | 0.889178176 |
| 0.050733333  | 0.190166667  | -0.169533333 | 0.88913024  |
| -0.059466667 | -0.0212      | -0.169555556 | 0.889116545 |
| -0.051       | -0.005433333 | -0.1696      | 0.889089155 |
| 0.017233333  | 0.0795       | -0.169677778 | 0.889041224 |
| -0.279233333 | -0.118466667 | -0.169722222 | 0.889013836 |
| -0.0487      | 0.084033333  | -0.169722222 | 0.889013836 |

|              |              |              |             |
|--------------|--------------|--------------|-------------|
| -0.094333333 | -0.1096      | -0.169733333 | 0.889006989 |
| -0.040433333 | 0.1012       | -0.169877778 | 0.888917985 |
| 0.12         | -0.0217      | -0.169911111 | 0.888897447 |
| -0.270733333 | -0.146166667 | -0.169922222 | 0.888890601 |
| -0.143833333 | -0.109833333 | -0.170066667 | 0.888801609 |
| -0.008633333 | 0.175133333  | -0.1701      | 0.888781073 |
| -0.137233333 | 0.027933333  | -0.170144444 | 0.888753694 |
| 0.149933333  | 0.073566667  | -0.170144444 | 0.888753694 |
| -0.229033333 | -0.287233333 | -0.170155556 | 0.888746849 |
| -0.0608      | -0.0583      | -0.170255556 | 0.888685248 |
| -0.032466667 | -0.138066667 | -0.170277778 | 0.888671559 |
| -0.088333333 | -0.1843      | -0.170311111 | 0.888651027 |
| -0.089466667 | -0.1737      | -0.170344444 | 0.888630495 |
| -0.109733333 | -0.082933333 | -0.170388889 | 0.888603119 |
| 0.1023       | -0.031966667 | -0.170411111 | 0.888589432 |
| -0.348133333 | -0.263466667 | -0.170433333 | 0.888575745 |
| -0.067       | -0.0207      | -0.170533333 | 0.888514156 |
| -0.1307      | -0.3302      | -0.170611111 | 0.888466256 |
| 0.041033333  | -0.144266667 | -0.170744444 | 0.888384148 |
| -0.044533333 | -0.142266667 | -0.170822222 | 0.888336255 |
| -0.0582      | -0.113566667 | -0.170844444 | 0.888322572 |
| -0.2015      | -0.0123      | -0.170888889 | 0.888295206 |
| -0.075766667 | 0.013933333  | -0.170944444 | 0.888261    |
| 0.073266667  | -0.0019      | -0.171066667 | 0.888185752 |
| -0.080233333 | -0.0958      | -0.171133333 | 0.88814471  |
| -0.044433333 | -0.5774      | -0.171166667 | 0.88812419  |
| -0.240766667 | -0.1856      | -0.171333333 | 0.888021596 |
| -0.053466667 | -0.1539      | -0.171411111 | 0.887973722 |
| -0.109033333 | -0.030933333 | -0.171422222 | 0.887966884 |
| -0.038366667 | -0.006733333 | -0.171422222 | 0.887966884 |
| 0.037566667  | -0.040633333 | -0.171455556 | 0.887946367 |
| -0.070533333 | -0.1762      | -0.171611111 | 0.887850632 |
| -0.1123      | -0.130866667 | -0.171622222 | 0.887843794 |
| -0.152966667 | -0.165366667 | -0.171888889 | 0.8876797   |
| -0.238733333 | -0.1495      | -0.171966667 | 0.887631846 |
| -0.0111      | 0.0558       | -0.172088889 | 0.88755665  |
| -0.053666667 | -0.153433333 | -0.172111111 | 0.887542979 |
| -0.105       | -0.168333333 | -0.172177778 | 0.887501967 |
| -0.232833333 | -0.0828      | -0.172233333 | 0.887467792 |
| 0.051033333  | -0.042933333 | -0.172233333 | 0.887467792 |
| -0.1109      | -0.032333333 | -0.172344444 | 0.887399445 |
| -0.213066667 | -0.148266667 | -0.172344444 | 0.887399445 |
| 0.139466667  | 0.0022       | -0.172366667 | 0.887385776 |
| -0.238266667 | -0.252533333 | -0.172611111 | 0.887235434 |
| -0.0477      | -0.139166667 | -0.1729      | 0.887057789 |
| 0.332466667  | 0.091033333  | -0.172933333 | 0.887037294 |
| 0.016        | 0.033166667  | -0.172955556 | 0.887023631 |



|              |              |              |             |
|--------------|--------------|--------------|-------------|
| -0.0932      | 0.077566667  | -0.1731      | 0.886934825 |
| -0.2161      | -0.111866667 | -0.173155556 | 0.886900672 |
| -0.048066667 | -0.157066667 | -0.173222222 | 0.886859689 |
| -0.068133333 | -0.168333333 | -0.173233333 | 0.886852859 |
| -0.032       | -0.123633333 | -0.173288889 | 0.886818709 |
| -0.1298      | -0.049666667 | -0.1733      | 0.886811879 |
| -0.035566667 | 0.002        | -0.173333333 | 0.886791389 |
| -0.190266667 | -0.111633333 | -0.173444444 | 0.886723094 |
| -0.271966667 | -0.084933333 | -0.173877778 | 0.886456795 |
| -0.153966667 | -0.077966667 | -0.173888889 | 0.886449968 |
| -0.234833333 | -0.269566667 | -0.173888889 | 0.886449968 |
| -0.181733333 | -0.043266667 | -0.1739      | 0.886443141 |
| -0.094233333 | 0.076333333  | -0.173922222 | 0.886429487 |
| 0.015033333  | 0.000133333  | -0.173966667 | 0.886402179 |
| -0.0871      | -0.021766667 | -0.174344444 | 0.8861701   |
| -0.1005      | -0.020533333 | -0.174611111 | 0.886006316 |
| -0.079566667 | -0.043733333 | -0.174644444 | 0.885985845 |
| -0.1916      | -0.140233333 | -0.174644444 | 0.885985845 |
| -0.1006      | -0.0791      | -0.174966667 | 0.885787985 |
| -0.232833333 | -0.251533333 | -0.1751      | 0.885706125 |
| -0.316233333 | -0.439966667 | -0.175188889 | 0.885651555 |
| -0.1954      | -0.266933333 | -0.175644444 | 0.88537194  |
| -0.0966      | -0.0589      | -0.175722222 | 0.885324209 |
| -0.253833333 | 0.046066667  | -0.175733333 | 0.885317391 |
| 0.110966667  | 0.0239       | -0.175766667 | 0.885296936 |
| -0.105366667 | -0.0212      | -0.175766667 | 0.885296936 |
| 0.084266667  | -0.017633333 | -0.176044444 | 0.885126496 |
| 0.0306       | -0.084133333 | -0.176155556 | 0.88505833  |
| -0.0358      | -0.0859      | -0.176222222 | 0.885017432 |
| 0.0046       | -0.0597      | -0.176244444 | 0.8850038   |
| -0.170366667 | -0.094933333 | -0.176244444 | 0.8850038   |
| 0.062566667  | -0.178533333 | -0.176277778 | 0.884983353 |
| 0.221733333  | 0.1501       | -0.1763      | 0.884969721 |
| -0.093366667 | -0.1714      | -0.176333333 | 0.884949274 |
| 0.0357       | 0.1192       | -0.176444444 | 0.884881121 |
| -0.111666667 | -0.274833333 | -0.176477778 | 0.884860676 |
| -0.115533333 | -0.1772      | -0.176477778 | 0.884860676 |
| -0.188566667 | 0.0176       | -0.176488889 | 0.884853862 |
| -0.002466667 | -0.275866667 | -0.176577778 | 0.884799345 |
| 0.022533333  | -0.113033333 | -0.176588889 | 0.88479253  |
| -0.112533333 | -0.131833333 | -0.1766      | 0.884785716 |
| -0.070133333 | -0.099333333 | -0.176655556 | 0.884751645 |
| -0.059366667 | 0.059133333  | -0.176655556 | 0.884751645 |
| 0.394666667  | -0.125133333 | -0.1767      | 0.884724389 |
| -0.194533333 | -0.009133333 | -0.1767      | 0.884724389 |
| -0.3686      | -0.410133333 | -0.176711111 | 0.884717576 |
| -0.1888      | 0.1009       | -0.176933333 | 0.884581311 |

|              |              |              |             |
|--------------|--------------|--------------|-------------|
| -0.169666667 | -0.127433333 | -0.177011111 | 0.884533623 |
| 0.029266667  | 0.129033333  | -0.177033333 | 0.884519998 |
| -0.183566667 | -0.1925      | -0.177044444 | 0.884513186 |
| -0.125833333 | -0.270333333 | -0.177133333 | 0.88445869  |
| -0.234433333 | -0.011633333 | -0.177144444 | 0.884451878 |
| -0.170933333 | -0.088966667 | -0.177166667 | 0.884438255 |
| -0.237933333 | -0.2272      | -0.177177778 | 0.884431444 |
| -0.065133333 | -0.1669      | -0.177222222 | 0.884404198 |
| -0.0383      | -0.184733333 | -0.177244444 | 0.884390575 |
| 0.0157       | 0.001        | -0.177255556 | 0.884383764 |
| -0.0916      | -0.103133333 | -0.177288889 | 0.88436333  |
| 0.0875       | 0.103133333  | -0.177577778 | 0.884186261 |
| -0.2451      | -0.142133333 | -0.177688889 | 0.884118167 |
| -0.242733333 | -0.167466667 | -0.1778      | 0.884050078 |
| 0.090333333  | -0.0262      | -0.177877778 | 0.884002419 |
| -0.1032      | -0.184533333 | -0.177966667 | 0.883947954 |
| -0.0421      | 0.051333333  | -0.177977778 | 0.883941147 |
| -0.1688      | -0.085366667 | -0.178022222 | 0.883913916 |
| 0.007433333  | -0.084166667 | -0.178033333 | 0.883907108 |
| -0.1731      | -0.2562      | -0.178133333 | 0.883845843 |
| -0.101266667 | -0.229233333 | -0.178144444 | 0.883839036 |
| -0.040766667 | -0.100033333 | -0.178322222 | 0.88373013  |
| -0.1224      | 0.0657       | -0.178344444 | 0.883716518 |
| -0.047333333 | 0.049166667  | -0.1785      | 0.883621238 |
| -0.122166667 | -0.152733333 | -0.178577778 | 0.883573602 |
| 0.069666667  | -0.118633333 | -0.178677778 | 0.88351236  |
| 0.0219       | 0.042833333  | -0.1787      | 0.883498751 |
| 0.1138       | 0.054566667  | -0.178711111 | 0.883491946 |
| 0.224366667  | -0.225666667 | -0.178766667 | 0.883457925 |
| -0.0317      | -0.221233333 | -0.178788889 | 0.883444317 |
| 0.000866667  | -0.202333333 | -0.1789      | 0.88337628  |
| -0.113633333 | 0.083733333  | -0.178922222 | 0.883362674 |
| -0.235966667 | -0.2197      | -0.179011111 | 0.883308249 |
| -0.072866667 | 0.035633333  | -0.179044444 | 0.88328784  |
| -0.0641      | -0.069133333 | -0.1791      | 0.883253827 |
| -0.031366667 | -0.049233333 | -0.179177778 | 0.883206211 |
| -0.312433333 | -0.129833333 | -0.179211111 | 0.883185805 |
| -0.0031      | -0.085533333 | -0.179522222 | 0.88299537  |
| -0.0156      | -0.017366667 | -0.179722222 | 0.882872969 |
| -0.1063      | -0.1337      | -0.179788889 | 0.882832173 |
| -0.009166667 | -0.086133333 | -0.179844444 | 0.882798177 |
| -0.043766667 | 0.077866667  | -0.179966667 | 0.882723391 |
| 0.051133333  | -0.094       | -0.18        | 0.882702996 |
| -0.383966667 | -0.178366667 | -0.1801      | 0.882641814 |
| -0.141833333 | -0.022166667 | -0.180133333 | 0.882621421 |
| -0.053866667 | -0.204566667 | -0.180144444 | 0.882614623 |
| 0.081866667  | 0.077866667  | -0.180144444 | 0.882614623 |

|              |              |              |             |
|--------------|--------------|--------------|-------------|
| -0.126633333 | 0.109433333  | -0.180155556 | 0.882607826 |
| -0.078266667 | -0.0159      | -0.180333333 | 0.882499072 |
| -0.0283      | -0.070733333 | -0.180466667 | 0.882417516 |
| -0.030233333 | -0.152       | -0.1806      | 0.882335967 |
| -0.1934      | -0.185033333 | -0.180755556 | 0.882240836 |
| 0.024033333  | -0.0791      | -0.180755556 | 0.882240836 |
| -0.053566667 | -0.151533333 | -0.1808      | 0.882213658 |
| -0.313066667 | -0.005933333 | -0.180933333 | 0.882132127 |
| -0.1554      | -0.1245      | -0.180977778 | 0.882104952 |
| -0.0426      | -0.0941      | -0.180988889 | 0.882098159 |
| -0.158566667 | -0.1343      | -0.181066667 | 0.882050605 |
| -0.160566667 | -0.215966667 | -0.181222222 | 0.881955505 |
| -0.149666667 | -0.081133333 | -0.181433333 | 0.881826457 |
| -0.026533333 | 0.045433333  | -0.181477778 | 0.881799291 |
| -0.2316      | -0.202566667 | -0.1815      | 0.881785709 |
| -0.053766667 | 0.039633333  | -0.181522222 | 0.881772126 |
| -0.186033333 | -0.248566667 | -0.181644444 | 0.881697428 |
| 0.0787       | -0.669166667 | -0.181677778 | 0.881677056 |
| 0.005433333  | -0.214533333 | -0.181722222 | 0.881649895 |
| -0.0751      | -0.219966667 | -0.181777778 | 0.881615945 |
| 0.0308       | 0.0239       | -0.1818      | 0.881602365 |
| -0.1727      | -0.146       | -0.181855556 | 0.881568417 |
| 0.0593       | -0.055966667 | -0.181855556 | 0.881568417 |
| -0.063766667 | -0.041366667 | -0.181888889 | 0.881548049 |
| -0.1351      | 0.065066667  | -0.181922222 | 0.881527681 |
| -0.169366667 | -0.191633333 | -0.181955556 | 0.881507314 |
| 0.001566667  | 0.0462       | -0.1821      | 0.88141906  |
| -0.167       | -0.070633333 | -0.182111111 | 0.881412272 |
| -0.025466667 | -0.150066667 | -0.182188889 | 0.881364755 |
| -0.134933333 | -0.1634      | -0.182288889 | 0.881303666 |
| -0.036033333 | -0.1841      | -0.182366667 | 0.881256155 |
| -0.158766667 | -0.062833333 | -0.1824      | 0.881235794 |
| -0.125       | 0.022        | -0.182677778 | 0.881066136 |
| -0.146766667 | 0.0133       | -0.182788889 | 0.880998282 |
| -0.2357      | -0.194733333 | -0.182822222 | 0.880977927 |
| -0.104666667 | -0.139466667 | -0.182888889 | 0.880937218 |
| -0.067333333 | -0.110133333 | -0.183033333 | 0.880849022 |
| -0.1515      | -0.051666667 | -0.183233333 | 0.880726919 |
| 0.0369       | -0.122266667 | -0.183344444 | 0.880659091 |
| -0.034266667 | -0.0118      | -0.183477778 | 0.880577705 |
| -0.241666667 | -0.1056      | -0.183811111 | 0.880374271 |
| -0.162066667 | -0.062566667 | -0.183944444 | 0.880292911 |
| -0.178966667 | -0.1503      | -0.183977778 | 0.880272573 |
| 0.1216       | 0.0128       | -0.184022222 | 0.880245455 |
| -0.308       | -0.145433333 | -0.1842      | 0.880136992 |
| 0.0238       | 0.034266667  | -0.184277778 | 0.880089544 |
| -0.063566667 | -0.077666667 | -0.1843      | 0.880075988 |

|              |              |              |             |
|--------------|--------------|--------------|-------------|
| -0.005       | -0.005333333 | -0.184333333 | 0.880055654 |
| -0.124733333 | -0.099966667 | -0.184366667 | 0.880035321 |
| -0.080733333 | -0.133033333 | -0.184511111 | 0.879947215 |
| 0.132366667  | 0.006166667  | -0.184744444 | 0.879804909 |
| -0.0002      | 0.009833333  | -0.184844444 | 0.879743927 |
| -0.016033333 | -0.0226      | -0.184933333 | 0.879689725 |
| -0.325466667 | -0.138233333 | -0.185188889 | 0.879533913 |
| -0.215033333 | -0.1598      | -0.185377778 | 0.879418765 |
| -0.0821      | 0.067566667  | -0.185533333 | 0.879323949 |
| -0.098266667 | 0.067733333  | -0.185533333 | 0.879323949 |
| -0.113633333 | -0.172166667 | -0.185588889 | 0.879290088 |
| -0.041733333 | 0.155566667  | -0.185611111 | 0.879276544 |
| -0.2778      | -0.2772      | -0.185622222 | 0.879269772 |
| -0.047066667 | -0.054233333 | -0.1857      | 0.879222371 |
| -0.087066667 | -0.0316      | -0.185877778 | 0.879114035 |
| 0.123766667  | -0.005066667 | -0.185888889 | 0.879107264 |
| -0.129233333 | 0.1909       | -0.185988889 | 0.879046331 |
| -0.195266667 | -0.154933333 | -0.186       | 0.879039561 |
| -0.1944      | -0.132733333 | -0.186055556 | 0.879005711 |
| -0.1064      | -0.201133333 | -0.186066667 | 0.878998942 |
| 0.041866667  | 0.012166667  | -0.186333333 | 0.878836483 |
| -0.029166667 | -0.0228      | -0.186644444 | 0.878646986 |
| -0.2093      | -0.082       | -0.186688889 | 0.878619918 |
| -0.093433333 | -0.0582      | -0.187       | 0.878430468 |
| -0.159166667 | -0.112566667 | -0.187044444 | 0.878403407 |
| -0.297066667 | -0.276833333 | -0.187122222 | 0.878356053 |
| -0.320233333 | -0.2608      | -0.187166667 | 0.878328994 |
| -0.1191      | -0.059133333 | -0.187288889 | 0.878254587 |
| -0.086566667 | -0.168933333 | -0.187333333 | 0.878227531 |
| -0.069333333 | -0.050566667 | -0.187344444 | 0.878220767 |
| -0.000566667 | 0.066866667  | -0.187377778 | 0.878200476 |
| -0.185033333 | -0.237633333 | -0.187422222 | 0.878173423 |
| -0.184333333 | -0.0038      | -0.187477778 | 0.878139606 |
| -0.1044      | -0.091966667 | -0.187533333 | 0.878105791 |
| -0.113833333 | -0.209233333 | -0.187611111 | 0.878058453 |
| 0.0979       | -0.136066667 | -0.187688889 | 0.878011117 |
| -0.2136      | -0.121033333 | -0.1877      | 0.878004355 |
| -0.020233333 | -0.099633333 | -0.187744444 | 0.877977307 |
| 0.052766667  | 0.050233333  | -0.187811111 | 0.877936736 |
| -0.172666667 | -0.0622      | -0.187833333 | 0.877923213 |
| -0.055133333 | -0.0785      | -0.187911111 | 0.877875885 |
| -0.3226      | -0.225533333 | -0.187955556 | 0.877848841 |
| -0.159933333 | 0.0488       | -0.188077778 | 0.877774474 |
| -0.204133333 | -0.3332      | -0.188155556 | 0.877727153 |
| 0.002733333  | -0.037566667 | -0.188155556 | 0.877727153 |
| -0.092133333 | -0.109166667 | -0.188222222 | 0.877686595 |
| -0.0739      | -0.208133333 | -0.188544444 | 0.877490588 |

|              |              |              |             |
|--------------|--------------|--------------|-------------|
| -0.0092      | -0.016566667 | -0.188577778 | 0.877470314 |
| -0.138233333 | 0.030466667  | -0.188677778 | 0.877409494 |
| -0.0494      | -0.208166667 | -0.188833333 | 0.877314894 |
| -0.097266667 | -0.338366667 | -0.188944444 | 0.877247329 |
| -0.2284      | -0.073133333 | -0.189033333 | 0.877193281 |
| -0.3645      | -0.201       | -0.189088889 | 0.877159503 |
| 0.159433333  | -0.0692      | -0.189188889 | 0.877098705 |
| 0.321533333  | 0.0126       | -0.1892      | 0.87709195  |
| 0.029        | -0.056133333 | -0.189211111 | 0.877085195 |
| 0.021666667  | -0.1128      | -0.189222222 | 0.87707844  |
| -0.216566667 | -0.103433333 | -0.189233333 | 0.877071685 |
| -0.2183      | -0.152033333 | -0.189288889 | 0.877037911 |
| -0.110766667 | -0.100266667 | -0.189333333 | 0.877010893 |
| 0.072833333  | 0.065466667  | -0.189333333 | 0.877010893 |
| -0.072       | -0.111833333 | -0.189411111 | 0.876963613 |
| -0.1813      | -0.234766667 | -0.189688889 | 0.876794778 |
| -0.091033333 | -0.109233333 | -0.189766667 | 0.87674751  |
| 0.0819       | 0.060466667  | -0.189922222 | 0.876652982 |
| -0.324133333 | -0.229       | -0.189944444 | 0.876639478 |
| -0.216633333 | -0.170733333 | -0.190033333 | 0.876585468 |
| 0.052866667  | 0.0832       | -0.1901      | 0.876544962 |
| -0.1562      | -0.142066667 | -0.190244444 | 0.876457205 |
| -0.211066667 | -0.190066667 | -0.190322222 | 0.876409956 |
| 0.017733333  | -0.187433333 | -0.1904      | 0.876362708 |
| -0.201233333 | -0.000666667 | -0.190566667 | 0.876261473 |
| -0.149366667 | -0.288133333 | -0.190566667 | 0.876261473 |
| -0.222733333 | -0.055166667 | -0.190655556 | 0.876207485 |
| 0.003033333  | 0.0246       | -0.190855556 | 0.876086026 |
| -0.126933333 | -0.197633333 | -0.191222222 | 0.875863393 |
| -0.1771      | -0.055       | -0.191311111 | 0.87580943  |
| -0.244033333 | -0.179833333 | -0.1914      | 0.87575547  |
| -0.080566667 | -0.279233333 | -0.191533333 | 0.875674537 |
| 0.1422       | -0.053366667 | -0.191633333 | 0.875613842 |
| -0.127733333 | -0.1087      | -0.191644444 | 0.875607099 |
| -0.0612      | -0.113466667 | -0.1917      | 0.875573381 |
| 0.0468       | -0.0364      | -0.191711111 | 0.875566638 |
| -0.2056      | -0.051366667 | -0.191822222 | 0.875499207 |
| 0.051966667  | -0.0257      | -0.191844444 | 0.875485722 |
| -0.148133333 | -0.166166667 | -0.192       | 0.87539133  |
| -0.163166667 | -0.113933333 | -0.192411111 | 0.875141913 |
| -0.122033333 | -0.0429      | -0.192433333 | 0.875128433 |
| -0.193266667 | -0.210033333 | -0.192444444 | 0.875121693 |
| -0.056366667 | -0.1797      | -0.192444444 | 0.875121693 |
| -0.0478      | -0.085533333 | -0.192488889 | 0.875094734 |
| -0.066833333 | -0.093033333 | -0.192611111 | 0.875020601 |
| -0.0485      | -0.049733333 | -0.192655556 | 0.874993645 |
| 0.269966667  | 0.1326       | -0.192788889 | 0.874912782 |

|              |              |              |             |
|--------------|--------------|--------------|-------------|
| -0.0565      | -0.103533333 | -0.192844444 | 0.874879092 |
| -0.175266667 | 0.0195       | -0.192955556 | 0.874811714 |
| -0.055333333 | -0.205766667 | -0.193222222 | 0.87465003  |
| -0.382266667 | -0.078266667 | -0.193355556 | 0.874569199 |
| -0.0498      | 0.083566667  | -0.193477778 | 0.87449511  |
| -0.112233333 | -0.0354      | -0.193511111 | 0.874474905 |
| -0.010966667 | -0.1992      | -0.193666667 | 0.874380622 |
| 0.026633333  | -0.027       | -0.193744444 | 0.874333484 |
| -0.0217      | 0.138466667  | -0.193944444 | 0.874212284 |
| -0.212566667 | -0.277433333 | -0.1941      | 0.874118029 |
| -0.057766667 | -0.0727      | -0.194166667 | 0.874077637 |
| 0.0546       | -0.084866667 | -0.1942      | 0.874057442 |
| 0.047        | 0.117133333  | -0.194277778 | 0.874010321 |
| 0.011466667  | -0.0653      | -0.194311111 | 0.873990128 |
| -0.157933333 | -0.078566667 | -0.194766667 | 0.873714194 |
| 0.357933333  | -0.095833333 | -0.194944444 | 0.873606536 |
| 0.036366667  | -0.141833333 | -0.195133333 | 0.873492164 |
| -0.274233333 | -0.185433333 | -0.1956      | 0.873209663 |
| -0.0788      | -0.193233333 | -0.195622222 | 0.873196213 |
| -0.198233333 | -0.1976      | -0.195755556 | 0.873115516 |
| -0.192866667 | -0.152633333 | -0.195766667 | 0.873108791 |
| -0.039666667 | -0.060566667 | -0.195811111 | 0.873081894 |
| -0.237066667 | -0.223433333 | -0.196144444 | 0.872880193 |
| -0.005133333 | -0.015866667 | -0.196211111 | 0.872839858 |
| -0.192166667 | -0.169533333 | -0.196244444 | 0.872819692 |
| 0.002666667  | -0.001166667 | -0.196333333 | 0.872765916 |
| -0.082533333 | -0.1336      | -0.196388889 | 0.872732308 |
| -0.0073      | 0.311666667  | -0.196488889 | 0.872671817 |
| -0.032466667 | -0.1821      | -0.196555556 | 0.872631492 |
| -0.218766667 | -0.207433333 | -0.196677778 | 0.872557567 |
| -0.155833333 | -0.235566667 | -0.196822222 | 0.87247021  |
| -0.036166667 | 0.011        | -0.196822222 | 0.87247021  |
| -0.072833333 | -0.263566667 | -0.196944444 | 0.8723963   |
| 0.051566667  | 0.074833333  | -0.197077778 | 0.872315677 |
| -0.145033333 | -0.256966667 | -0.197177778 | 0.872255214 |
| -0.376466667 | -0.2689      | -0.197222222 | 0.872228344 |
| -0.099       | -0.0558      | -0.197277778 | 0.872194756 |
| 0.019766667  | -0.092666667 | -0.197333333 | 0.87216117  |
| -0.056433333 | -0.182       | -0.197444444 | 0.872094002 |
| -0.023766667 | 0.0561       | -0.197644444 | 0.871973113 |
| -0.237166667 | -0.040966667 | -0.197888889 | 0.871825382 |
| -0.1774      | -0.1546      | -0.197977778 | 0.871771668 |
| -0.0462      | -0.209433333 | -0.198066667 | 0.871717957 |
| -0.1846      | -0.188333333 | -0.198077778 | 0.871711243 |
| -0.134866667 | -0.151366667 | -0.198144444 | 0.871670962 |
| -0.076233333 | -0.213266667 | -0.198222222 | 0.871623971 |
| -0.0474      | 0.040433333  | -0.198433333 | 0.871496434 |

|              |              |              |             |
|--------------|--------------|--------------|-------------|
| -0.340133333 | -0.028933333 | -0.198533333 | 0.871436029 |
| -0.3425      | -0.387333333 | -0.198611111 | 0.87138905  |
| -0.049033333 | 0.018966667  | -0.198644444 | 0.871368917 |
| -0.112233333 | -0.252733333 | -0.198688889 | 0.871342073 |
| -0.162833333 | -0.158466667 | -0.198711111 | 0.871328652 |
| -0.248366667 | -0.0283      | -0.198855556 | 0.871241418 |
| -0.109566667 | -0.057466667 | -0.198977778 | 0.871167611 |
| -0.2341      | 0.014233333  | -0.199044444 | 0.871127355 |
| -0.013466667 | -0.032233333 | -0.199055556 | 0.871120646 |
| -0.122733333 | -0.143333333 | -0.199111111 | 0.871087102 |
| 0.056366667  | 0.012666667  | -0.199322222 | 0.870959644 |
| -0.038966667 | 0.085166667  | -0.199333333 | 0.870952936 |
| -0.032       | -0.1704      | -0.199411111 | 0.870905983 |
| -0.0082      | -0.132933333 | -0.199544444 | 0.870825498 |
| -0.0716      | -0.1576      | -0.199544444 | 0.870825498 |
| -0.101766667 | 0.0368       | -0.199566667 | 0.870812084 |
| -0.241233333 | -0.048833333 | -0.199677778 | 0.87074502  |
| -0.246233333 | -0.211533333 | -0.1998      | 0.870671256 |
| -0.119866667 | -0.062866667 | -0.199944444 | 0.870584087 |
| -0.0307      | -0.161066667 | -0.199977778 | 0.870563973 |
| -0.081766667 | -0.144833333 | -0.200122222 | 0.870476815 |
| -0.109333333 | -0.1643      | -0.200155556 | 0.870456703 |
| -0.0606      | -0.180033333 | -0.200166667 | 0.870449999 |
| -0.067133333 | 0.048633333  | -0.200222222 | 0.87041648  |
| 0.304766667  | 0.116033333  | -0.200233333 | 0.870409777 |
| -0.0488      | 0.447933333  | -0.200555556 | 0.870215395 |
| -0.031166667 | 0.003866667  | -0.200777778 | 0.870081363 |
| -0.098033333 | -0.144233333 | -0.200866667 | 0.870027757 |
| -0.2351      | -0.104266667 | -0.200933333 | 0.869987554 |
| -0.4027      | -0.1757      | -0.201       | 0.869947353 |
| 0.0972       | 0.027933333  | -0.201477778 | 0.8696593   |
| -0.3763      | -0.265433333 | -0.2016      | 0.869585627 |
| -0.0863      | 0.013033333  | -0.2017      | 0.869525354 |
| 0.060066667  | -0.018766667 | -0.201877778 | 0.869418212 |
| -0.224366667 | -0.0498      | -0.201888889 | 0.869411516 |
| -0.085233333 | -0.141933333 | -0.2019      | 0.869404821 |
| -0.032566667 | -0.074733333 | -0.201922222 | 0.869391429 |
| -0.124833333 | 0.099733333  | -0.201977778 | 0.869357951 |
| -0.087233333 | -0.087266667 | -0.202055556 | 0.869311084 |
| -0.183633333 | -0.0826      | -0.202077778 | 0.869297694 |
| -0.303466667 | -0.2627      | -0.202177778 | 0.869237441 |
| -0.086       | -0.083766667 | -0.202388889 | 0.869110254 |
| -0.110366667 | 0.074166667  | -0.202411111 | 0.869096867 |
| -0.239466667 | -0.2096      | -0.202422222 | 0.869090173 |
| 0.116033333  | -0.084233333 | -0.202433333 | 0.86908348  |
| -0.283966667 | -0.263033333 | -0.202477778 | 0.869056707 |
| 0.0327       | 0.0449       | -0.2025      | 0.86904332  |

|              |              |              |             |
|--------------|--------------|--------------|-------------|
| 0.040766667  | 0.006366667  | -0.202522222 | 0.869029934 |
| -0.0176      | 0.065233333  | -0.202611111 | 0.868976392 |
| 0.1389       | 0.194633333  | -0.202644444 | 0.868956315 |
| -0.104866667 | -0.213266667 | -0.2028      | 0.868862627 |
| -0.048       | -0.0183      | -0.202911111 | 0.868795713 |
| -0.1375      | -0.167533333 | -0.203       | 0.868742185 |
| 0.005033333  | 0.001266667  | -0.203011111 | 0.868735494 |
| -0.077       | -0.001266667 | -0.203022222 | 0.868728804 |
| -0.0554      | -0.030766667 | -0.203033333 | 0.868722113 |
| -0.090633333 | 0.030633333  | -0.203044444 | 0.868715423 |
| -0.204133333 | -0.188233333 | -0.203066667 | 0.868702042 |
| 0.022466667  | -0.016766667 | -0.203066667 | 0.868702042 |
| 0.002133333  | 0.0074       | -0.203077778 | 0.868695351 |
| 0.005666667  | 0.077866667  | -0.203077778 | 0.868695351 |
| -0.1027      | -0.0092      | -0.203155556 | 0.86864852  |
| -0.078666667 | -0.013333333 | -0.203177778 | 0.86863514  |
| -0.179433333 | -0.016433333 | -0.203188889 | 0.86862845  |
| 0.068333333  | -0.045666667 | -0.203366667 | 0.868521419 |
| -0.087633333 | -0.209566667 | -0.203633333 | 0.868360897 |
| -0.4063      | -0.3525      | -0.203655556 | 0.868347521 |
| -0.159733333 | -0.157966667 | -0.2037      | 0.868320771 |
| -0.1861      | -0.242533333 | -0.203788889 | 0.868267273 |
| -0.294666667 | -0.233166667 | -0.203788889 | 0.868267273 |
| -0.087033333 | -0.052033333 | -0.203844444 | 0.868233838 |
| -0.150866667 | -0.062033333 | -0.204033333 | 0.86812017  |
| -0.1146      | -0.006433333 | -0.204144444 | 0.868053313 |
| -0.0582      | -0.0148      | -0.204255556 | 0.867986461 |
| 0.116066667  | 0.064066667  | -0.204311111 | 0.867953037 |
| -0.158033333 | -0.259433333 | -0.204377778 | 0.86791293  |
| -0.163833333 | -0.224333333 | -0.204433333 | 0.867879509 |
| -0.0264      | -0.101466667 | -0.204444444 | 0.867872825 |
| -0.121133333 | -0.0108      | -0.204455556 | 0.867866141 |
| -0.201066667 | -0.1293      | -0.204511111 | 0.867832722 |
| -0.074666667 | -0.159533333 | -0.204522222 | 0.867826038 |
| -0.069933333 | -0.034633333 | -0.204711111 | 0.867712423 |
| -0.134       | 0.0547       | -0.204766667 | 0.867679009 |
| -0.018733333 | -0.181566667 | -0.204877778 | 0.867612186 |
| 0.347166667  | 0.262133333  | -0.204877778 | 0.867612186 |
| -0.047433333 | -0.1796      | -0.205011111 | 0.867532006 |
| -0.148666667 | -0.196766667 | -0.205077778 | 0.867491918 |
| -0.161366667 | -0.044066667 | -0.205177778 | 0.86743179  |
| 0.179166667  | 0.092166667  | -0.205222222 | 0.867405068 |
| -0.0687      | 0.019766667  | -0.205366667 | 0.867318227 |
| -0.2244      | -0.136866667 | -0.205411111 | 0.867291508 |
| -0.1237      | -0.354933333 | -0.205411111 | 0.867291508 |
| -0.135166667 | -0.323466667 | -0.205566667 | 0.867197999 |
| -0.1242      | -0.199666667 | -0.205622222 | 0.867164606 |



|              |              |              |             |
|--------------|--------------|--------------|-------------|
| -0.0935      | -0.1856      | -0.205677778 | 0.867131213 |
| -0.3118      | -0.2583      | -0.205733333 | 0.867097822 |
| 0.028666667  | 0.0495       | -0.205755556 | 0.867084466 |
| -0.15        | -0.135833333 | -0.206011111 | 0.866930887 |
| 0.007866667  | -0.0333      | -0.206166667 | 0.866837417 |
| 0.029066667  | 0.1089       | -0.206177778 | 0.866830741 |
| -0.1935      | -0.0709      | -0.206333333 | 0.866737282 |
| -0.115133333 | -0.200266667 | -0.206388889 | 0.866703906 |
| 0.069166667  | -0.352133333 | -0.206411111 | 0.866690556 |
| -0.180733333 | -0.189833333 | -0.206422222 | 0.866683881 |
| 0.076633333  | 0.1899       | -0.206433333 | 0.866677206 |
| 0.001766667  | -0.0107      | -0.206511111 | 0.866630483 |
| -0.239266667 | -0.3188      | -0.206533333 | 0.866617135 |
| -0.2933      | -0.3204      | -0.206611111 | 0.866570415 |
| 0.072966667  | 0.131433333  | -0.206877778 | 0.866410254 |
| -0.0019      | 0.038766667  | -0.207       | 0.866336856 |
| -0.119566667 | -0.2054      | -0.207011111 | 0.866330184 |
| -0.269133333 | -0.2808      | -0.207133333 | 0.866256794 |
| -0.284633333 | -0.054266667 | -0.207444444 | 0.866070009 |
| -0.139766667 | 0.0295       | -0.207455556 | 0.866063339 |
| -0.108466667 | 0.085833333  | -0.207477778 | 0.866049999 |
| -0.1922      | -0.1363      | -0.207588889 | 0.865983301 |
| 0.023333333  | -0.171       | -0.207633333 | 0.865956624 |
| -0.265733333 | 0.0473       | -0.207744444 | 0.865889934 |
| 0.034        | -0.104       | -0.207788889 | 0.865863259 |
| -0.002433333 | -0.113666667 | -0.207888889 | 0.865803244 |
| 0.1266       | 0.2582       | -0.208       | 0.865736566 |
| -0.129666667 | -0.132866667 | -0.208177778 | 0.865629891 |
| 0.096966667  | -0.621733333 | -0.208188889 | 0.865623224 |
| -0.110133333 | -0.1805      | -0.208422222 | 0.865483234 |
| -0.3454      | -0.298266667 | -0.208677778 | 0.865329938 |
| 0.0048       | -0.081933333 | -0.208877778 | 0.865209986 |
| -0.033033333 | -0.2606      | -0.209077778 | 0.865090051 |
| -0.179466667 | -0.140366667 | -0.209144444 | 0.865050076 |
| -0.278733333 | -0.118933333 | -0.209155556 | 0.865043414 |
| -0.1558      | -0.0655      | -0.209177778 | 0.86503009  |
| -0.233933333 | -0.271966667 | -0.209377778 | 0.864910179 |
| -0.0933      | -0.017866667 | -0.209411111 | 0.864890196 |
| -0.0882      | -0.086433333 | -0.209411111 | 0.864890196 |
| -0.083366667 | -0.2489      | -0.209666667 | 0.864737005 |
| -0.157       | -0.1637      | -0.209688889 | 0.864723685 |
| -0.1663      | -0.1058      | -0.209744444 | 0.864690387 |
| 0.288133333  | -0.180333333 | -0.209755556 | 0.864683727 |
| -0.185266667 | -0.072833333 | -0.209877778 | 0.864610476 |
| -0.227333333 | -0.281366667 | -0.209911111 | 0.8645905   |
| -0.120233333 | -0.152       | -0.209977778 | 0.864550548 |
| -0.144066667 | -0.160133333 | -0.210044444 | 0.864510598 |

|              |              |              |             |
|--------------|--------------|--------------|-------------|
| -0.0631      | -0.042933333 | -0.210366667 | 0.864317534 |
| 0.011166667  | -0.134866667 | -0.210411111 | 0.864290907 |
| -0.078866667 | -0.127233333 | -0.210477778 | 0.86425097  |
| -0.0499      | 0.0175       | -0.210611111 | 0.8641711   |
| -0.3027      | -0.243966667 | -0.210666667 | 0.864137823 |
| 0.0088       | -0.0583      | -0.210755556 | 0.864084582 |
| -0.220866667 | -0.161266667 | -0.2111      | 0.863878306 |
| -0.037333333 | -0.1533      | -0.211111111 | 0.863871653 |
| -0.093933333 | -0.1328      | -0.211511111 | 0.86363217  |
| -0.121866667 | -0.1163      | -0.211611111 | 0.863572309 |
| -0.174966667 | -0.0134      | -0.211633333 | 0.863559008 |
| 0.022533333  | -0.029266667 | -0.211655556 | 0.863545706 |
| 0.122566667  | -0.156066667 | -0.211777778 | 0.863472551 |
| -0.0221      | -0.047933333 | -0.211777778 | 0.863472551 |
| -0.251066667 | -0.1543      | -0.211777778 | 0.863472551 |
| -0.168733333 | -0.0332      | -0.2118      | 0.863459251 |
| -0.147933333 | -0.1127      | -0.211922222 | 0.863386104 |
| -0.159133333 | -0.072566667 | -0.212222222 | 0.863206586 |
| -0.092133333 | 0.074133333  | -0.212355556 | 0.863126813 |
| -0.1791      | -0.1316      | -0.212422222 | 0.863086929 |
| 0.0466       | -0.099366667 | -0.212544444 | 0.863013813 |
| 0.2373       | 0.0961       | -0.212811111 | 0.862854309 |
| -0.228866667 | -0.3452      | -0.212911111 | 0.862794502 |
| -0.182333333 | -0.2129      | -0.213011111 | 0.8627347   |
| -0.0852      | -0.101433333 | -0.213111111 | 0.862674902 |
| -0.0462      | 0.277333333  | -0.213111111 | 0.862674902 |
| -0.081733333 | -0.0006      | -0.213133333 | 0.862661614 |
| -0.073333333 | -0.026533333 | -0.213311111 | 0.862555318 |
| 0.007866667  | -0.092233333 | -0.213577778 | 0.862395899 |
| -0.188       | -0.1753      | -0.213655556 | 0.862349407 |
| -0.3644      | -0.1227      | -0.213822222 | 0.86224979  |
| -0.132       | -0.1983      | -0.213833333 | 0.862243149 |
| -0.1803      | -0.159933333 | -0.213911111 | 0.862196666 |
| -0.103633333 | -0.1129      | -0.214022222 | 0.862130265 |
| -0.1337      | -0.252566667 | -0.214122222 | 0.862070509 |
| -0.1555      | -0.143333333 | -0.214255556 | 0.86199084  |
| -0.0391      | -0.1688      | -0.214288889 | 0.861970925 |
| -0.067166667 | -0.0542      | -0.214311111 | 0.861957647 |
| -0.16        | 0.016233333  | -0.214311111 | 0.861957647 |
| -0.088333333 | -0.072066667 | -0.214333333 | 0.861944371 |
| -0.1237      | -0.057266667 | -0.214777778 | 0.861678876 |
| -0.304166667 | -0.228666667 | -0.214888889 | 0.861612515 |
| 0.005266667  | 0.015266667  | -0.214955556 | 0.861572701 |
| -0.379066667 | -0.343933333 | -0.215011111 | 0.861539524 |
| -0.291933333 | -0.053966667 | -0.215077778 | 0.861499714 |
| -0.116033333 | -0.014433333 | -0.215077778 | 0.861499714 |
| -0.236333333 | -0.206933333 | -0.215088889 | 0.861493079 |

|              |              |              |             |
|--------------|--------------|--------------|-------------|
| -0.2484      | -0.2212      | -0.215233333 | 0.861406829 |
| -0.0993      | 0.1001       | -0.215233333 | 0.861406829 |
| -0.119033333 | -0.179566667 | -0.215388889 | 0.861313955 |
| -0.189633333 | -0.3256      | -0.215422222 | 0.861294055 |
| -0.041166667 | -0.2106      | -0.2155      | 0.861247622 |
| 0.1026       | 0.033666667  | -0.215511111 | 0.861240989 |
| -0.0896      | -0.172166667 | -0.215577778 | 0.861201192 |
| -0.091033333 | 0.0284       | -0.215955556 | 0.860975712 |
| -0.094666667 | -0.136833333 | -0.215966667 | 0.860969081 |
| -0.031233333 | -0.454833333 | -0.216044444 | 0.860922666 |
| -0.161933333 | -0.055133333 | -0.216088889 | 0.860896144 |
| -0.040566667 | -0.049366667 | -0.216166667 | 0.860849733 |
| -0.187533333 | -0.202433333 | -0.216366667 | 0.860730402 |
| -0.032766667 | -0.038766667 | -0.2164      | 0.860710516 |
| 0.0527       | -0.004366667 | -0.216511111 | 0.860644229 |
| -0.188333333 | -0.0342      | -0.216611111 | 0.860584576 |
| 0.077733333  | 0.007933333  | -0.216633333 | 0.86057132  |
| -0.0254      | 0.052233333  | -0.216744444 | 0.860505045 |
| 0.066833333  | 0.119433333  | -0.216833333 | 0.860452028 |
| -0.169033333 | 0.0622       | -0.216922222 | 0.860399015 |
| -0.1302      | -0.031333333 | -0.216955556 | 0.860379136 |
| 0.089233333  | 0.029233333  | -0.216977778 | 0.860365883 |
| 0.0673       | -0.173933333 | -0.217077778 | 0.860306249 |
| -0.099533333 | 0.030966667  | -0.2171      | 0.860292998 |
| -0.077666667 | -0.0756      | -0.217166667 | 0.860253245 |
| -0.000333333 | 0.0058       | -0.217355556 | 0.860140621 |
| -0.1418      | -0.136133333 | -0.217366667 | 0.860133996 |
| -0.058       | 0.0893       | -0.217366667 | 0.860133996 |
| -0.0902      | -0.008633333 | -0.217455556 | 0.860081002 |
| -0.369133333 | -0.3165      | -0.217455556 | 0.860081002 |
| -0.226533333 | -0.211066667 | -0.217466667 | 0.860074378 |
| 0.548233333  | -0.187566667 | -0.217577778 | 0.860008141 |
| 0.0898       | 0.046066667  | -0.217766667 | 0.85989555  |
| -0.228333333 | -0.137266667 | -0.218033333 | 0.859736622 |
| -0.127966667 | -0.0244      | -0.218066667 | 0.859716758 |
| -0.3051      | -0.040066667 | -0.2182      | 0.859637307 |
| 0.0906       | 0.007966667  | -0.218244444 | 0.859610825 |
| -0.009066667 | -0.007366667 | -0.218422222 | 0.859504905 |
| -0.066066667 | -0.1427      | -0.218555556 | 0.859425473 |
| -0.091766667 | 0.202833333  | -0.2186      | 0.859398998 |
| -0.139033333 | 0.000666667  | -0.2187      | 0.859339431 |
| -0.209       | -0.2603      | -0.2188      | 0.859279868 |
| -0.068866667 | -0.003866667 | -0.218811111 | 0.85927325  |
| -0.196366667 | -0.176366667 | -0.218822222 | 0.859266633 |
| -0.197733333 | -0.084133333 | -0.218977778 | 0.859173989 |
| 0.0296       | -0.0864      | -0.219255556 | 0.859008579 |
| 0.041533333  | -0.159466667 | -0.219366667 | 0.858942424 |

|              |              |              |             |
|--------------|--------------|--------------|-------------|
| -0.1429      | -0.199666667 | -0.2194      | 0.858922578 |
| 0.1191       | 0.029666667  | -0.219444444 | 0.858896118 |
| -0.053666667 | 0.066566667  | -0.219777778 | 0.858697694 |
| -0.1483      | -0.0336      | -0.2199      | 0.85862495  |
| -0.052966667 | -0.132633333 | -0.219933333 | 0.858605112 |
| -0.284666667 | -0.229       | -0.22        | 0.858565436 |
| -0.1532      | 0.0649       | -0.220044444 | 0.858538987 |
| -0.053966667 | -0.143933333 | -0.2201      | 0.858505927 |
| 0.053866667  | -0.386766667 | -0.220122222 | 0.858492704 |
| -0.0508      | -0.090233333 | -0.2202      | 0.858446422 |
| 0.025933333  | -0.113833333 | -0.220266667 | 0.858406755 |
| -0.146933333 | -0.1379      | -0.220455556 | 0.858294373 |
| -0.107366667 | 0.0743       | -0.220622222 | 0.858195224 |
| 0.1316       | 0.233833333  | -0.220666667 | 0.858168787 |
| 0.060666667  | 0.0592       | -0.220744444 | 0.858122523 |
| -0.1704      | -0.163       | -0.220855556 | 0.858056436 |
| -0.1979      | -0.235333333 | -0.2209      | 0.858030002 |
| -0.174333333 | -0.010966667 | -0.220933333 | 0.858010178 |
| -0.062       | -0.0271      | -0.221011111 | 0.857963923 |
| -0.123966667 | 0.044166667  | -0.221177778 | 0.857864813 |
| -0.033866667 | -0.093033333 | -0.221422222 | 0.857719472 |
| -0.277466667 | -0.269766667 | -0.221622222 | 0.857600575 |
| -0.171933333 | -0.091066667 | -0.221766667 | 0.857514715 |
| -0.081666667 | 0.0184       | -0.221788889 | 0.857501507 |
| 0.090533333  | -0.1039      | -0.221888889 | 0.857442071 |
| 0.124833333  | 0.020766667  | -0.222077778 | 0.857329815 |
| -0.096066667 | 0.172733333  | -0.222166667 | 0.857276994 |
| -0.095766667 | -0.155       | -0.222233333 | 0.857237381 |
| -0.1778      | -0.1424      | -0.222255556 | 0.857224177 |
| -0.279333333 | -0.147066667 | -0.222333333 | 0.857177964 |
| 0.0169       | -0.0838      | -0.222411111 | 0.857131753 |
| -0.173866667 | -0.285266667 | -0.222477778 | 0.857092146 |
| -0.004833333 | 0.042366667  | -0.222544444 | 0.857052541 |
| 0.100766667  | -0.0198      | -0.222622222 | 0.857006337 |
| -0.1159      | 0.017366667  | -0.222866667 | 0.856861142 |
| -0.0725      | -0.025633333 | -0.222866667 | 0.856861142 |
| 0.045966667  | 0.061733333  | -0.222911111 | 0.856834745 |
| -0.4178      | -0.2833      | -0.222922222 | 0.856828146 |
| -0.259833333 | 0.0277       | -0.223155556 | 0.856689579 |
| 0.018933333  | -0.004166667 | -0.223166667 | 0.856682981 |
| -0.106133333 | -0.017133333 | -0.223277778 | 0.856617005 |
| -0.056833333 | 0.082166667  | -0.223322222 | 0.856590616 |
| -0.190366667 | -0.077833333 | -0.223433333 | 0.856524647 |
| -0.0629      | 0.060266667  | -0.223577778 | 0.856438895 |
| -0.162833333 | -0.183933333 | -0.223688889 | 0.856372938 |
| -0.3498      | -0.123466667 | -0.223722222 | 0.856353152 |
| -0.036666667 | -0.448333333 | -0.223744444 | 0.856339961 |

|              |              |              |             |
|--------------|--------------|--------------|-------------|
| -0.047933333 | -0.0351      | -0.223833333 | 0.856287201 |
| -0.0691      | 0.016233333  | -0.223855556 | 0.856274011 |
| -0.2145      | -0.313633333 | -0.223966667 | 0.856208067 |
| 0.026266667  | -0.191766667 | -0.224       | 0.856188285 |
| -0.235133333 | -0.139633333 | -0.224144444 | 0.856102566 |
| -0.151166667 | -0.103333333 | -0.224277778 | 0.856023449 |
| -0.250666667 | -0.148066667 | -0.224355556 | 0.855977301 |
| -0.0664      | -0.178733333 | -0.224366667 | 0.855970709 |
| -0.1002      | -0.163533333 | -0.224444444 | 0.855924563 |
| -0.221633333 | -0.171533333 | -0.224533333 | 0.855871829 |
| -0.073633333 | -0.205566667 | -0.224533333 | 0.855871829 |
| -0.037833333 | -0.2034      | -0.224622222 | 0.855819097 |
| -0.089366667 | -0.140766667 | -0.2247      | 0.85577296  |
| -0.230533333 | -0.0665      | -0.224733333 | 0.855753188 |
| 0.000866667  | -0.027166667 | -0.2248      | 0.855713645 |
| 0.3178       | 0.051133333  | -0.224811111 | 0.855707054 |
| -0.1694      | -0.225633333 | -0.224811111 | 0.855707054 |
| -0.079133333 | -0.030666667 | -0.224866667 | 0.855674103 |
| -0.013533333 | -0.024866667 | -0.224922222 | 0.855641153 |
| -0.255233333 | -0.216333333 | -0.224955556 | 0.855621384 |
| -0.142533333 | -0.071833333 | -0.225111111 | 0.855529133 |
| -0.1477      | -0.000366667 | -0.225255556 | 0.855443481 |
| -0.0455      | -0.049533333 | -0.2253      | 0.855417128 |
| -0.200233333 | -0.207466667 | -0.225344444 | 0.855390776 |
| 0.007        | -0.2291      | -0.225366667 | 0.8553776   |
| -0.132666667 | -0.235       | -0.225477778 | 0.855311725 |
| -0.122633333 | 0.8154       | -0.225588889 | 0.855245854 |
| -0.2231      | -0.212133333 | -0.225588889 | 0.855245854 |
| -0.076066667 | 0.002066667  | -0.2256      | 0.855239268 |
| -0.1807      | -0.224433333 | -0.2257      | 0.855179989 |
| -0.203033333 | -0.210066667 | -0.225911111 | 0.855054859 |
| -0.137433333 | 0.341166667  | -0.225922222 | 0.855048274 |
| 0.262066667  | 0.1827       | -0.226111111 | 0.854936331 |
| -0.213866667 | -0.1111      | -0.226111111 | 0.854936331 |
| -0.0276      | -0.049       | -0.226722222 | 0.854574266 |
| -0.068933333 | -0.134966667 | -0.226755556 | 0.854554521 |
| 0.147633333  | 0.256633333  | -0.227088889 | 0.8543571   |
| -0.318333333 | -0.116433333 | -0.2271      | 0.85435052  |
| -0.0591      | -0.166433333 | -0.227377778 | 0.854186038 |
| 0.018433333  | -0.058966667 | -0.227444444 | 0.854146567 |
| -0.122266667 | -0.3356      | -0.227511111 | 0.854107098 |
| -0.1179      | 0.102        | -0.227666667 | 0.854015011 |
| -0.230433333 | -0.121233333 | -0.2277      | 0.853995279 |
| -0.3424      | -0.4173      | -0.227722222 | 0.853982125 |
| -0.002733333 | 0.022033333  | -0.227777778 | 0.85394924  |
| -0.088066667 | -0.1615      | -0.227855556 | 0.853903204 |
| -0.013666667 | -0.026633333 | -0.2279      | 0.853876899 |

|              |              |              |             |
|--------------|--------------|--------------|-------------|
| -0.229466667 | -0.179866667 | -0.227966667 | 0.853837442 |
| 0.1306       | 0.012566667  | -0.227977778 | 0.853830866 |
| -0.015433333 | -0.0953      | -0.228077778 | 0.853771685 |
| -0.447133333 | -0.353966667 | -0.2281      | 0.853758534 |
| -0.219533333 | -0.358266667 | -0.228111111 | 0.853751959 |
| -0.023933333 | -0.1071      | -0.228133333 | 0.853738809 |
| 0.161533333  | 0.229366667  | -0.228377778 | 0.853594167 |
| 0.090933333  | 0.191333333  | -0.228477778 | 0.853535002 |
| 0.056133333  | -0.0235      | -0.228488889 | 0.853528429 |
| 0.159833333  | 0.2038       | -0.2287      | 0.85340354  |
| -0.122766667 | 0.093033333  | -0.228744444 | 0.85337725  |
| -0.036466667 | -0.030566667 | -0.228788889 | 0.853350961 |
| -0.219366667 | -0.358133333 | -0.229022222 | 0.853212956 |
| 0.155066667  | -0.059033333 | -0.229166667 | 0.853127535 |
| 0.0967       | 0.021566667  | -0.229333333 | 0.853028984 |
| -0.1176      | -0.215766667 | -0.229377778 | 0.853002705 |
| -0.3858      | -0.198533333 | -0.229566667 | 0.852891031 |
| -0.0345      | -0.032933333 | -0.229644444 | 0.852845052 |
| 0.026366667  | -0.232       | -0.229744444 | 0.852785939 |
| -0.013166667 | -0.025233333 | -0.2298      | 0.8527531   |
| -0.1585      | -0.019033333 | -0.229833333 | 0.852733398 |
| -0.25        | -0.1178      | -0.229844444 | 0.85272683  |
| -0.242033333 | -0.072866667 | -0.230133333 | 0.852556095 |
| 0.064466667  | 0.051233333  | -0.230133333 | 0.852556095 |
| -0.085366667 | -0.1609      | -0.230155556 | 0.852542963 |
| 0.039333333  | -0.034466667 | -0.230288889 | 0.852464175 |
| -0.027066667 | -0.023366667 | -0.230355556 | 0.852424784 |
| 0.045966667  | -0.010533333 | -0.230433333 | 0.85237883  |
| -0.325133333 | -0.156833333 | -0.230444444 | 0.852372265 |
| -0.0695      | 0.1054       | -0.230444444 | 0.852372265 |
| 0.054766667  | -0.0924      | -0.230544444 | 0.852313185 |
| -0.296366667 | -0.244733333 | -0.230666667 | 0.852240982 |
| -0.094366667 | -0.006       | -0.230711111 | 0.852214728 |
| -0.1685      | -0.156066667 | -0.230755556 | 0.852188474 |
| 0.026533333  | -0.276333333 | -0.230855556 | 0.852129407 |
| -0.139033333 | -0.157866667 | -0.230877778 | 0.852116282 |
| -0.215066667 | -0.068033333 | -0.230922222 | 0.852090031 |
| -0.255233333 | -0.200966667 | -0.230977778 | 0.852057219 |
| -0.155966667 | -0.051433333 | -0.231133333 | 0.851965353 |
| -0.332166667 | -0.1352      | -0.231355556 | 0.851834133 |
| -0.1551      | -0.121166667 | -0.231366667 | 0.851827572 |
| -0.3013      | -0.173066667 | -0.231488889 | 0.85175541  |
| -0.2284      | -0.2015      | -0.231533333 | 0.851729171 |
| -0.101666667 | -0.337266667 | -0.231644444 | 0.851663576 |
| -0.199666667 | -0.206566667 | -0.231888889 | 0.851519286 |
| -0.0796      | -0.144366667 | -0.2319      | 0.851512728 |
| 0.071533333  | -0.0589      | -0.232266667 | 0.85129634  |

|              |              |              |             |
|--------------|--------------|--------------|-------------|
| 0.042666667  | 0.078766667  | -0.232388889 | 0.851224223 |
| -0.1024      | -0.077466667 | -0.232611111 | 0.851093117 |
| 0.100166667  | 0.0666       | -0.232644444 | 0.851073453 |
| -0.2068      | -0.132333333 | -0.232655556 | 0.851066898 |
| -0.164266667 | 0.035633333  | -0.232744444 | 0.851014463 |
| -0.0197      | -0.091233333 | -0.232822222 | 0.850968585 |
| -0.204066667 | -0.244266667 | -0.232877778 | 0.850935816 |
| -9.00E-04    | -0.035466667 | -0.232888889 | 0.850929262 |
| -0.081133333 | -0.230833333 | -0.2329      | 0.850922709 |
| -0.149633333 | -0.1964      | -0.2332      | 0.850745783 |
| -0.033566667 | 0.0435       | -0.233422222 | 0.85061475  |
| -0.108433333 | -0.193366667 | -0.233811111 | 0.850385492 |
| 0.0181       | -0.0408      | -0.233833333 | 0.850372393 |
| 0.015466667  | -0.065633333 | -0.233855556 | 0.850359295 |
| -0.158       | -0.2764      | -0.233966667 | 0.850293806 |
| -0.0772      | 0.1103       | -0.234144444 | 0.850189034 |
| -0.000533333 | -0.0132      | -0.234177778 | 0.85016939  |
| -0.302033333 | -0.126866667 | -0.234222222 | 0.8501432   |
| -0.210066667 | -0.165366667 | -0.234277778 | 0.850110463 |
| 0.009366667  | 0.025366667  | -0.2344      | 0.850038447 |
| -0.2082      | -0.206833333 | -0.234511111 | 0.849972982 |
| -0.272666667 | -0.279666667 | -0.234544444 | 0.849953344 |
| -0.06        | -0.0936      | -0.234622222 | 0.849907523 |
| 0.023433333  | -0.078766667 | -0.234666667 | 0.849881341 |
| -0.190933333 | 0.022566667  | -0.234722222 | 0.849848614 |
| 0.2996       | 0.3792       | -0.234722222 | 0.849848614 |
| -0.272666667 | -0.152733333 | -0.234833333 | 0.849783164 |
| -0.4162      | -0.098333333 | -0.234933333 | 0.849724264 |
| -0.0076      | -0.0736      | -0.234977778 | 0.849698087 |
| 0.026933333  | -0.042733333 | -0.234988889 | 0.849691543 |
| -0.178633333 | -0.257066667 | -0.235044444 | 0.849658824 |
| -0.032233333 | 0.024733333  | -0.235066667 | 0.849645736 |
| 0.044566667  | -0.024666667 | -0.235088889 | 0.849632649 |
| -0.080666667 | -0.018933333 | -0.235355556 | 0.849475618 |
| -0.075433333 | -0.0525      | -0.235488889 | 0.849397114 |
| 0.290433333  | 0.365066667  | -0.235666667 | 0.849292452 |
| -0.191333333 | -0.196666667 | -0.235766667 | 0.849233586 |
| -0.215433333 | -0.2741      | -0.235811111 | 0.849207424 |
| 0.021333333  | -0.098633333 | -0.236066667 | 0.849057011 |
| -0.0388      | 0.076466667  | -0.236077778 | 0.849050472 |
| -0.0231      | 0.0067       | -0.2361      | 0.849037394 |
| -0.077       | -0.199333333 | -0.236122222 | 0.849024316 |
| -0.1488      | -0.170666667 | -0.236255556 | 0.848945853 |
| 0.073266667  | -0.210433333 | -0.236322222 | 0.848906624 |
| -0.149433333 | -0.1205      | -0.236511111 | 0.848795486 |
| -0.1625      | -0.1774      | -0.236622222 | 0.848730117 |
| -0.129866667 | -0.275166667 | -0.2367      | 0.848684362 |

|              |              |              |             |
|--------------|--------------|--------------|-------------|
| -0.2266      | -0.183       | -0.236777778 | 0.84863861  |
| -0.133866667 | 0.058533333  | -0.236922222 | 0.848553647 |
| -0.3368      | -0.139233333 | -0.236933333 | 0.848547112 |
| -0.0819      | -0.016266667 | -0.236944444 | 0.848540577 |
| 0.010966667  | 0.0181       | -0.237088889 | 0.848455624 |
| -0.266866667 | -0.15        | -0.237244444 | 0.848364146 |
| 0.014666667  | -0.060633333 | -0.237288889 | 0.848338011 |
| -0.1376      | -0.044066667 | -0.237366667 | 0.848292277 |
| -0.2071      | -0.1961      | -0.237566667 | 0.848174687 |
| -0.252633333 | -0.2895      | -0.237577778 | 0.848168155 |
| -0.0846      | -0.258766667 | -0.237722222 | 0.84808324  |
| -0.048766667 | -0.1967      | -0.237844444 | 0.848011395 |
| -0.285533333 | -0.2012      | -0.237944444 | 0.847952617 |
| -0.0613      | 0.125633333  | -0.238644444 | 0.847541288 |
| -0.364833333 | -0.145966667 | -0.238711111 | 0.847502124 |
| 0.027433333  | 0.064466667  | -0.238911111 | 0.847384643 |
| -0.190166667 | -0.160333333 | -0.239022222 | 0.847319383 |
| 0.022833333  | 0.166033333  | -0.2392      | 0.847214978 |
| -0.150866667 | -0.0761      | -0.239411111 | 0.847091013 |
| -0.053966667 | -0.099633333 | -0.239433333 | 0.847077965 |
| 0.1123       | -0.050033333 | -0.239455556 | 0.847064918 |
| 0.126633333  | 0.029866667  | -0.239488889 | 0.847045346 |
| -0.198466667 | -0.2589      | -0.2395      | 0.847038823 |
| -0.1383      | -0.0809      | -0.239544444 | 0.847012729 |
| -0.1594      | -0.123233333 | -0.239644444 | 0.84695402  |
| -0.183       | 0.060633333  | -0.2399      | 0.846804006 |
| -0.141833333 | -0.0885      | -0.239911111 | 0.846797485 |
| -0.0496      | -0.257433333 | -0.240266667 | 0.846588815 |
| -0.122533333 | -0.0206      | -0.240288889 | 0.846575775 |
| -0.115333333 | -0.101466667 | -0.240455556 | 0.84647798  |
| -0.055333333 | -0.172266667 | -0.240533333 | 0.846432347 |
| -0.0747      | -0.148866667 | -0.240588889 | 0.846399753 |
| 0.0067       | -0.000933333 | -0.240688889 | 0.846341087 |
| -0.050166667 | -0.069866667 | -0.240888889 | 0.846223767 |
| -0.347933333 | -0.2104      | -0.241077778 | 0.84611298  |
| -0.294733333 | -0.1811      | -0.241088889 | 0.846106464 |
| -0.1956      | -0.2479      | -0.241122222 | 0.846086915 |
| 0.039133333  | 0.006566667  | -0.241211111 | 0.846034786 |
| -0.055266667 | -0.0358      | -0.241255556 | 0.846008723 |
| -0.131066667 | -0.117833333 | -0.241355556 | 0.845950085 |
| -0.1776      | -0.2559      | -0.241488889 | 0.845871906 |
| -0.082033333 | -0.0537      | -0.241544444 | 0.845839333 |
| 0.246966667  | 0.050266667  | -0.241744444 | 0.845722083 |
| -0.2842      | -0.245633333 | -0.241955556 | 0.845598337 |
| -0.0604      | -0.011466667 | -0.241966667 | 0.845591824 |
| 0.062633333  | -0.0016      | -0.242122222 | 0.845500655 |
| -0.0821      | -0.1619      | -0.242155556 | 0.84548112  |



|              |              |              |             |
|--------------|--------------|--------------|-------------|
| -0.021133333 | -0.1999      | -0.242455556 | 0.845305326 |
| -0.162966667 | -0.066366667 | -0.242588889 | 0.845227206 |
| -0.1373      | -0.0804      | -0.2426      | 0.845220697 |
| -0.1819      | -0.101733333 | -0.242644444 | 0.845194659 |
| 0.006933333  | -0.203766667 | -0.242711111 | 0.845155604 |
| -0.118733333 | -0.327466667 | -0.242755556 | 0.845129568 |
| 0.121866667  | -0.1023      | -0.242766667 | 0.845123059 |
| 0.0822       | 0.099266667  | -0.242977778 | 0.8449994   |
| -0.217766667 | -0.149433333 | -0.243155556 | 0.84489528  |
| 0.035033333  | -0.178366667 | -0.243222222 | 0.844856239 |
| 0.020266667  | -0.063333333 | -0.243288889 | 0.844817199 |
| 0.042166667  | -0.129333333 | -0.243322222 | 0.84479768  |
| 0.0519       | -0.084333333 | -0.243355556 | 0.844778161 |
| -0.0193      | 0.0161       | -0.243655556 | 0.844602513 |
| 0.1502       | 0.1253       | -0.243788889 | 0.844524459 |
| -0.1226      | -0.089433333 | -0.243866667 | 0.84447893  |
| -0.220066667 | -0.2595      | -0.243877778 | 0.844472426 |
| 0.002933333  | -0.044766667 | -0.244144444 | 0.844316349 |
| 0.052        | -0.025566667 | -0.244166667 | 0.844303344 |
| -0.376       | -0.274966667 | -0.244188889 | 0.844290339 |
| -0.1701      | -0.179533333 | -0.244311111 | 0.844218816 |
| 0.090633333  | 0.015733333  | -0.244366667 | 0.844186307 |
| -0.064933333 | -0.054133333 | -0.244533333 | 0.844088788 |
| -0.243666667 | -0.194466667 | -0.244566667 | 0.844069286 |
| -0.1662      | -0.264433333 | -0.244911111 | 0.843867788 |
| -0.138433333 | -0.465633333 | -0.244922222 | 0.843861289 |
| -0.2144      | -0.242066667 | -0.244922222 | 0.843861289 |
| -0.256       | -0.125433333 | -0.244955556 | 0.843841792 |
| -0.1784      | 0.091933333  | -0.244988889 | 0.843822295 |
| 0.032533333  | 0.115233333  | -0.244988889 | 0.843822295 |
| -0.171733333 | -0.195866667 | -0.245111111 | 0.843750811 |
| 0.010933333  | 0.0125       | -0.245188889 | 0.843705324 |
| -0.298333333 | -0.3918      | -0.2452      | 0.843698827 |
| -0.0321      | 0.007433333  | -0.245244444 | 0.843672835 |
| -0.093266667 | -0.014066667 | -0.245455556 | 0.843549389 |
| 0.180766667  | 0.157        | -0.245488889 | 0.843529899 |
| -0.342733333 | -0.3434      | -0.245533333 | 0.843503913 |
| -0.011066667 | -0.229233333 | -0.245533333 | 0.843503913 |
| -0.6252      | -0.325833333 | -0.245555556 | 0.843490921 |
| -0.147033333 | -0.202566667 | -0.2457      | 0.843406473 |
| -0.091233333 | -0.055933333 | -0.245744444 | 0.843380491 |
| -0.112633333 | -0.099833333 | -0.245755556 | 0.843373996 |
| -0.002466667 | 0.110833333  | -0.245755556 | 0.843373996 |
| -0.2549      | -0.1744      | -0.245811111 | 0.84334152  |
| 0.092133333  | 0.0081       | -0.245833333 | 0.84332853  |
| 0.081233333  | 0.017166667  | -0.245877778 | 0.84330255  |
| -0.152766667 | -0.040733333 | -0.2459      | 0.843289561 |

|              |              |              |             |
|--------------|--------------|--------------|-------------|
| -0.0586      | -0.094233333 | -0.245922222 | 0.843276571 |
| 0.010733333  | -0.7326      | -0.246011111 | 0.843224616 |
| -0.184966667 | -0.196666667 | -0.246022222 | 0.843218122 |
| 0.057733333  | 0.082933333  | -0.246288889 | 0.843062276 |
| 0.012633333  | 0.011733333  | -0.246377778 | 0.843010334 |
| -0.237333333 | -0.279433333 | -0.246444444 | 0.84297138  |
| -0.067766667 | -0.020766667 | -0.246555556 | 0.84290646  |
| -0.302433333 | -0.0915      | -0.246722222 | 0.842809089 |
| -0.219033333 | -0.1794      | -0.246733333 | 0.842802598 |
| 0.087933333  | -0.212       | -0.2468      | 0.842763653 |
| -0.195433333 | 0.0317       | -0.246911111 | 0.842698749 |
| -0.1773      | -0.185       | -0.2471      | 0.842588424 |
| -0.0699      | 0.0055       | -0.247155556 | 0.842555978 |
| -0.106433333 | -0.014533333 | -0.247211111 | 0.842523533 |
| 0.034033333  | -0.143766667 | -0.247233333 | 0.842510556 |
| -0.080833333 | 0.087566667  | -0.247311111 | 0.842465136 |
| -0.0469      | -0.292833333 | -0.247388889 | 0.842419719 |
| -0.155766667 | -0.210566667 | -0.247633333 | 0.842276994 |
| -0.181366667 | -0.011633333 | -0.247777778 | 0.842192669 |
| -0.361233333 | -0.0948      | -0.247811111 | 0.84217321  |
| -0.225566667 | -0.206866667 | -0.247855556 | 0.842147266 |
| -0.2004      | -0.302766667 | -0.248066667 | 0.842024043 |
| -0.287933333 | -0.1612      | -0.2481      | 0.842004588 |
| -0.062966667 | -0.007666667 | -0.248111111 | 0.841998103 |
| -0.042666667 | 0.0488       | -0.248166667 | 0.84196568  |
| -0.1398      | -0.035866667 | -0.248555556 | 0.841738753 |
| -0.283666667 | -0.144933333 | -0.248788889 | 0.841602626 |
| -0.178133333 | -0.047166667 | -0.248833333 | 0.841576699 |
| -0.182766667 | -0.0654      | -0.248833333 | 0.841576699 |
| -0.089533333 | -0.098133333 | -0.248866667 | 0.841557255 |
| -0.2906      | -0.286633333 | -0.248911111 | 0.84153133  |
| -0.225466667 | -0.032166667 | -0.249111111 | 0.841414677 |
| 0.1145       | 0.0292       | -0.249122222 | 0.841408197 |
| -0.1328      | -0.2472      | -0.249155556 | 0.841388756 |
| 0.0227       | -0.0183      | -0.249322222 | 0.841291561 |
| -0.1508      | -0.0603      | -0.249477778 | 0.841200855 |
| -0.064566667 | -0.147366667 | -0.2495      | 0.841187898 |
| 0.0143       | 0.001466667  | -0.249544444 | 0.841161985 |
| 0.144        | 0.208933333  | -0.249677778 | 0.841084248 |
| 0.015533333  | -0.063966667 | -0.249744444 | 0.841045383 |
| -0.0163      | 0.081333333  | -0.249944444 | 0.840928797 |
| -0.059666667 | -0.019133333 | -0.250066667 | 0.840857558 |
| -0.534933333 | -0.107966667 | -0.250111111 | 0.840831655 |
| -0.373533333 | -0.226966667 | -0.250144444 | 0.840812228 |
| -0.356333333 | -0.2992      | -0.250166667 | 0.840799277 |
| -0.232166667 | -0.0723      | -0.250177778 | 0.840792801 |
| -0.139866667 | -0.054233333 | -0.250211111 | 0.840773375 |

|              |              |              |             |
|--------------|--------------|--------------|-------------|
| -0.319433333 | -0.302766667 | -0.250255556 | 0.840747474 |
| -0.1539      | -0.162333333 | -0.250277778 | 0.840734524 |
| 0.063566667  | -0.0693      | -0.2504      | 0.840663302 |
| -0.1853      | -0.145866667 | -0.250411111 | 0.840656827 |
| -0.165733333 | 0.0363       | -0.250633333 | 0.840527348 |
| -0.099433333 | -0.151966667 | -0.2508      | 0.840430253 |
| -0.003133333 | -0.134166667 | -0.250977778 | 0.840326696 |
| 0.1447       | -0.022633333 | -0.251066667 | 0.840274922 |
| -0.124233333 | 0.1332       | -0.251266667 | 0.840158444 |
| -0.2619      | -0.203366667 | -0.2513      | 0.840139032 |
| -0.218766667 | -0.463733333 | -0.251322222 | 0.840126091 |
| 0.053733333  | -0.1358      | -0.251355556 | 0.84010668  |
| 0.008        | -0.373966667 | -0.2515      | 0.840022572 |
| -0.283266667 | -0.020266667 | -0.251511111 | 0.840016103 |
| -0.094433333 | -0.242166667 | -0.251588889 | 0.839970817 |
| -0.2606      | -0.3514      | -0.251977778 | 0.839744428 |
| -0.006033333 | -0.043333333 | -0.252144444 | 0.839647422 |
| -0.182533333 | -0.2132      | -0.252333333 | 0.839537496 |
| -0.194       | -0.1388      | -0.252411111 | 0.839492237 |
| -0.173533333 | -0.2402      | -0.252422222 | 0.839485771 |
| -0.01        | -0.106666667 | -0.252455556 | 0.839466375 |
| -0.096633333 | -0.0517      | -0.252766667 | 0.839285367 |
| -0.2365      | -0.4351      | -0.252855556 | 0.839233658 |
| -0.022566667 | -0.053       | -0.252911111 | 0.839201341 |
| -0.213866667 | -0.0359      | -0.252911111 | 0.839201341 |
| 0.002266667  | -0.010966667 | -0.253022222 | 0.839136712 |
| 0.368466667  | 0.146133333  | -0.253266667 | 0.838994544 |
| -0.117066667 | -0.135066667 | -0.253266667 | 0.838994544 |
| -0.141733333 | -0.124066667 | -0.253733333 | 0.838723199 |
| -0.464066667 | -0.378633333 | -0.253888889 | 0.83863277  |
| -0.062633333 | -0.1868      | -0.253977778 | 0.838581101 |
| -0.1679      | -0.1304      | -0.254044444 | 0.838542351 |
| 0.004733333  | -0.0415      | -0.254077778 | 0.838522977 |
| 0.124566667  | -0.0115      | -0.254088889 | 0.838516519 |
| -0.075566667 | -0.064533333 | -0.254177778 | 0.838464857 |
| 0.0034       | -0.0042      | -0.2542      | 0.838451942 |
| -0.203633333 | -0.237666667 | -0.254288889 | 0.838400284 |
| -0.153433333 | 0.181633333  | -0.254411111 | 0.83832926  |
| -0.493533333 | -0.1432      | -0.254466667 | 0.838296978 |
| 0.0296       | -0.018533333 | -0.254588889 | 0.838225962 |
| 0.038733333  | 0.072        | -0.254744444 | 0.838135587 |
| -0.233       | -0.138166667 | -0.254788889 | 0.838109767 |
| 0.008466667  | 0.024566667  | -0.254866667 | 0.838064585 |
| -0.319266667 | -0.1306      | -0.255044444 | 0.83796132  |
| -0.1059      | -0.200233333 | -0.255144444 | 0.837903239 |
| -0.064       | 0.017866667  | -0.255166667 | 0.837890332 |
| -0.1319      | -0.120733333 | -0.255322222 | 0.837799993 |

|              |              |              |             |
|--------------|--------------|--------------|-------------|
| -0.0633      | 0.022733333  | -0.255355556 | 0.837780636 |
| -0.164566667 | -0.119833333 | -0.2555      | 0.837696761 |
| 0.024966667  | 0.3478       | -0.2555      | 0.837696761 |
| -0.308933333 | -0.376366667 | -0.255577778 | 0.837651601 |
| -0.008033333 | -0.051333333 | -0.255622222 | 0.837625796 |
| -0.043166667 | -0.069133333 | -0.255722222 | 0.837567738 |
| -0.121733333 | -0.102566667 | -0.255777778 | 0.837535485 |
| -0.3169      | -0.3153      | -0.255855556 | 0.837490334 |
| 0.016733333  | 0.092433333  | -0.255922222 | 0.837451635 |
| -0.427233333 | -0.1421      | -0.256066667 | 0.837367792 |
| -0.1895      | -0.1527      | -0.256066667 | 0.837367792 |
| -0.0213      | -0.048166667 | -0.256088889 | 0.837354894 |
| -0.168833333 | -0.3734      | -0.256144444 | 0.83732265  |
| -0.0297      | -0.044       | -0.256155556 | 0.837316201 |
| -0.280533333 | -0.111733333 | -0.256311111 | 0.837225924 |
| -0.237566667 | -0.2758      | -0.2564      | 0.837174341 |
| -0.266033333 | -0.337866667 | -0.256411111 | 0.837167894 |
| -0.000866667 | -0.125833333 | -0.256422222 | 0.837161446 |
| -0.358333333 | -0.3903      | -0.256444444 | 0.837148551 |
| -0.075766667 | -0.236966667 | -0.256533333 | 0.837096974 |
| -0.204166667 | -0.198633333 | -0.2567      | 0.837000274 |
| -0.0495      | 0.066066667  | -0.256711111 | 0.836993828 |
| -0.205666667 | -0.340466667 | -0.256755556 | 0.836968043 |
| -0.188566667 | -0.058866667 | -0.2571      | 0.83676824  |
| -0.0453      | -0.024033333 | -0.257155556 | 0.836736019 |
| -0.132733333 | -0.085433333 | -0.257166667 | 0.836729574 |
| -0.026066667 | -0.055866667 | -0.257233333 | 0.83669091  |
| -0.104333333 | -0.149766667 | -0.257288889 | 0.836658691 |
| -0.122266667 | -0.069933333 | -0.2574      | 0.836594257 |
| -0.2279      | -0.271166667 | -0.257444444 | 0.836568485 |
| -0.188366667 | -0.281533333 | -0.257811111 | 0.836355895 |
| -0.197433333 | -0.2012      | -0.257811111 | 0.836355895 |
| -0.014933333 | 0.018833333  | -0.257822222 | 0.836349454 |
| -0.044366667 | 0.0041       | -0.257922222 | 0.836291484 |
| -0.155233333 | 0.111466667  | -0.258022222 | 0.836233519 |
| -0.031066667 | -0.0866      | -0.2586      | 0.835898687 |
| -0.118633333 | 0.019433333  | -0.258622222 | 0.835885812 |
| 0.017        | 0.056866667  | -0.258866667 | 0.835744195 |
| -0.3019      | -0.213733333 | -0.258877778 | 0.835737758 |
| 0.0491       | 0.122333333  | -0.258944444 | 0.83569914  |
| -0.025333333 | -0.224166667 | -0.259011111 | 0.835660523 |
| -0.108466667 | -0.206433333 | -0.259066667 | 0.835628344 |
| -0.041066667 | -0.247966667 | -0.2591      | 0.835609037 |
| -0.1262      | -0.155933333 | -0.259166667 | 0.835570424 |
| -0.172833333 | -0.139166667 | -0.259177778 | 0.835563989 |
| -0.0197      | 0.007266667  | -0.259388889 | 0.835441729 |
| -0.203766667 | -0.2813      | -0.2594      | 0.835435295 |

|              |              |              |             |
|--------------|--------------|--------------|-------------|
| -0.116233333 | -0.0373      | -0.259411111 | 0.835428861 |
| -0.270866667 | -0.264733333 | -0.259422222 | 0.835422427 |
| -0.149933333 | -0.205766667 | -0.259522222 | 0.835364522 |
| -0.192866667 | -0.0074      | -0.259577778 | 0.835332354 |
| -0.0546      | -0.1237      | -0.259711111 | 0.835255156 |
| -0.089033333 | 0.1025       | -0.259788889 | 0.835210128 |
| -0.210433333 | -0.221833333 | -0.260222222 | 0.834959298 |
| -0.133033333 | -0.107033333 | -0.260255556 | 0.834940007 |
| -0.2592      | -0.248666667 | -0.2603      | 0.834914286 |
| -0.024066667 | -0.1124      | -0.260422222 | 0.834843557 |
| -0.070633333 | -0.137133333 | -0.260544444 | 0.834772833 |
| 0.0231       | 0.0368       | -0.260555556 | 0.834766404 |
| -0.331966667 | -0.299533333 | -0.260611111 | 0.834734259 |
| -0.284733333 | -0.1948      | -0.260633333 | 0.834721402 |
| -0.1098      | -0.1095      | -0.260777778 | 0.834637833 |
| -0.0296      | 0.072333333  | -0.261344444 | 0.834310065 |
| -0.1093      | -0.119533333 | -0.261488889 | 0.834226537 |
| -0.005966667 | 0.081233333  | -0.261588889 | 0.834168715 |
| -0.2264      | 0.065466667  | -0.261677778 | 0.834117321 |
| -0.020333333 | -0.0475      | -0.261722222 | 0.834091625 |
| -0.325533333 | -0.2971      | -0.261844444 | 0.834020966 |
| -0.3314      | -0.397466667 | -0.2619      | 0.83398885  |
| -0.190233333 | -0.329066667 | -0.261988889 | 0.833937466 |
| -0.097066667 | 0.094166667  | -0.262033333 | 0.833911776 |
| -0.005133333 | -0.059466667 | -0.262033333 | 0.833911776 |
| -0.218566667 | -0.1736      | -0.262088889 | 0.833879664 |
| -0.1879      | -0.137833333 | -0.262155556 | 0.833841132 |
| 0.0134       | -0.137566667 | -0.262222222 | 0.833802601 |
| 0.037533333  | 0.1434       | -0.262266667 | 0.833776915 |
| -0.106833333 | -0.218566667 | -0.262333333 | 0.833738387 |
| -0.294566667 | -0.078433333 | -0.262366667 | 0.833719124 |
| -0.2419      | -0.081       | -0.262388889 | 0.833706282 |
| -0.166633333 | -0.237966667 | -0.2624      | 0.833699861 |
| -0.177033333 | -0.170233333 | -0.262533333 | 0.833622814 |
| -0.003466667 | -0.002733333 | -0.262544444 | 0.833616394 |
| -0.2465      | -0.148966667 | -0.262555556 | 0.833609974 |
| -0.295133333 | -0.1595      | -0.262644444 | 0.833558614 |
| -0.0279      | -0.046533333 | -0.262855556 | 0.833436648 |
| -0.170566667 | -0.1195      | -0.263055556 | 0.833321117 |
| -0.105833333 | -0.121466667 | -0.263155556 | 0.833263357 |
| -0.179333333 | -0.4246      | -0.263333333 | 0.833160684 |
| -0.099266667 | -0.0413      | -0.263344444 | 0.833154267 |
| -0.166866667 | -0.197866667 | -0.263388889 | 0.833128601 |
| -0.267333333 | -0.422966667 | -0.263411111 | 0.833115768 |
| -0.011433333 | 0.0001       | -0.263433333 | 0.833102936 |
| -0.070833333 | -0.090133333 | -0.263433333 | 0.833102936 |
| 0.0045       | -0.023966667 | -0.263888889 | 0.832839911 |

|              |              |              |             |
|--------------|--------------|--------------|-------------|
| -0.3021      | -0.464266667 | -0.2639      | 0.832833496 |
| -0.0741      | -0.1501      | -0.263988889 | 0.832782185 |
| -0.056533333 | -0.071533333 | -0.264066667 | 0.832737289 |
| 0.057366667  | -0.016566667 | -0.264322222 | 0.832589793 |
| -0.1786      | -0.409733333 | -0.264344444 | 0.832576969 |
| 0.035666667  | 0.010266667  | -0.264444444 | 0.832519261 |
| 0.041333333  | 0.08         | -0.264733333 | 0.832352572 |
| 0.008366667  | -0.0041      | -0.265222222 | 0.832070559 |
| -0.131       | -0.170066667 | -0.265222222 | 0.832070559 |
| -0.155366667 | -0.061866667 | -0.2654      | 0.831968032 |
| -0.1633      | -0.195233333 | -0.265588889 | 0.831859112 |
| -0.273533333 | -0.358266667 | -0.265866667 | 0.83169896  |
| -0.181733333 | -0.235633333 | -0.265866667 | 0.83169896  |
| -0.261566667 | -0.127333333 | -0.266022222 | 0.831609289 |
| 0.0807       | -0.004733333 | -0.266055556 | 0.831590075 |
| -0.185733333 | -0.130366667 | -0.266066667 | 0.83158367  |
| -0.1405      | -0.339733333 | -0.266077778 | 0.831577266 |
| -0.1008      | -0.112133333 | -0.2663      | 0.831449185 |
| -0.2141      | -0.293       | -0.266522222 | 0.831321125 |
| 0.0415       | -0.019133333 | -0.266544444 | 0.83130832  |
| -0.105866667 | -0.030966667 | -0.266566667 | 0.831295515 |
| -0.4047      | -0.255633333 | -0.266744444 | 0.831193084 |
| -0.143066667 | -0.094866667 | -0.266877778 | 0.831116269 |
| -0.2352      | -0.224333333 | -0.266911111 | 0.831097066 |
| -0.217166667 | -0.227333333 | -0.266966667 | 0.831065063 |
| -0.215733333 | -0.1017      | -0.266977778 | 0.831058663 |
| -0.007933333 | 0.030066667  | -0.267233333 | 0.830911464 |
| -0.08        | -0.2392      | -0.267322222 | 0.83086027  |
| -0.2353      | -0.1081      | -0.267333333 | 0.830853871 |
| -0.105733333 | -0.1541      | -0.267366667 | 0.830834675 |
| 0.0273       | -0.030533333 | -0.267388889 | 0.830821877 |
| -0.210766667 | -0.226866667 | -0.267422222 | 0.830802682 |
| -0.3414      | -0.347666667 | -0.267666667 | 0.830661926 |
| -0.0094      | -0.032966667 | -0.2678      | 0.83058516  |
| -0.1035      | -0.0677      | -0.267877778 | 0.830540383 |
| -0.0839      | 0.0285       | -0.268       | 0.830470024 |
| -0.119066667 | -0.473233333 | -0.268       | 0.830470024 |
| -0.246833333 | -0.1911      | -0.268088889 | 0.830418858 |
| -0.070833333 | 0.014966667  | -0.268488889 | 0.830188649 |
| -0.034666667 | -0.039266667 | -0.2685      | 0.830182255 |
| 0.002066667  | -0.009766667 | -0.268533333 | 0.830163074 |
| -0.097566667 | -0.006666667 | -0.268555556 | 0.830150287 |
| -0.429333333 | -0.2863      | -0.268766667 | 0.830028819 |
| 0.082933333  | -0.0185      | -0.268766667 | 0.830028819 |
| -0.084233333 | -0.000266667 | -0.268811111 | 0.830003249 |
| -0.0099      | -0.082833333 | -0.268822222 | 0.829996857 |
| -0.018733333 | -0.087833333 | -0.268933333 | 0.829932936 |

|              |              |              |             |
|--------------|--------------|--------------|-------------|
| -0.2341      | -0.2599      | -0.269033333 | 0.829875411 |
| 0.062733333  | -0.023433333 | -0.269433333 | 0.829645353 |
| -0.2825      | -0.171666667 | -0.269522222 | 0.829594237 |
| -0.0937      | -0.0895      | -0.269877778 | 0.829389807 |
| -0.392266667 | -0.397233333 | -0.270311111 | 0.829140726 |
| -0.124633333 | -0.019766667 | -0.270611111 | 0.828968329 |
| 0.006533333  | 0.331633333  | -0.270688889 | 0.828923639 |
| -0.161566667 | -0.118933333 | -0.270833333 | 0.82884065  |
| -0.195466667 | -0.1238      | -0.271188889 | 0.828636406 |
| -0.1612      | 0.016166667  | -0.271355556 | 0.828540684 |
| -0.141466667 | 0.0838       | -0.271388889 | 0.82852154  |
| -0.0114      | -0.0395      | -0.271433333 | 0.828496017 |
| -0.2083      | 0.0159       | -0.271555556 | 0.828425831 |
| 0.009466667  | -0.0797      | -0.271588889 | 0.828406691 |
| -0.0867      | -0.251633333 | -0.271811111 | 0.828279099 |
| -0.0509      | -0.111933333 | -0.271855556 | 0.828253583 |
| -0.1666      | -0.2684      | -0.272166667 | 0.828074993 |
| -0.153333333 | -0.111233333 | -0.272188889 | 0.828062238 |
| -0.193166667 | -0.130766667 | -0.272222222 | 0.828043106 |
| -0.326966667 | -0.4771      | -0.272333333 | 0.827979335 |
| -0.2699      | -0.304066667 | -0.272455556 | 0.827909194 |
| 0.010966667  | 0.036633333  | -0.272788889 | 0.827717928 |
| -0.148466667 | -0.0309      | -0.272844444 | 0.827686055 |
| -0.1371      | -0.272233333 | -0.272955556 | 0.827622312 |
| -0.265733333 | -0.2715      | -0.273044444 | 0.827571321 |
| 0.000966667  | -0.0276      | -0.273088889 | 0.827545827 |
| -0.1457      | 0.011433333  | -0.273188889 | 0.827488468 |
| -0.012233333 | 0.071066667  | -0.273233333 | 0.827462976 |
| -0.1191      | -0.1237      | -0.273444444 | 0.827341901 |
| -0.2132      | -0.192       | -0.273511111 | 0.827303671 |
| -0.197133333 | -0.1497      | -0.273555556 | 0.827278185 |
| -0.030433333 | -0.009466667 | -0.273655556 | 0.827220844 |
| -0.280633333 | -0.2866      | -0.273911111 | 0.827074325 |
| -0.191       | -0.251133333 | -0.274155556 | 0.826934201 |
| -0.066033333 | -0.059933333 | -0.2744      | 0.826794101 |
| -0.364266667 | -0.227466667 | -0.274733333 | 0.826603093 |
| -0.2081      | -0.295666667 | -0.274744444 | 0.826596727 |
| -0.103933333 | -0.1053      | -0.274755556 | 0.82659036  |
| -0.1097      | -0.221333333 | -0.274922222 | 0.826494874 |
| -0.039866667 | 0.174366667  | -0.274955556 | 0.826475779 |
| 0.0521       | -0.1495      | -0.275033333 | 0.826431223 |
| -0.242433333 | -0.025233333 | -0.275111111 | 0.82638667  |
| -0.143766667 | -0.074233333 | -0.275188889 | 0.82634212  |
| 0.037166667  | -0.095966667 | -0.275344444 | 0.826253026 |
| -0.086033333 | -0.110733333 | -0.275433333 | 0.82620212  |
| -0.0549      | -0.1299      | -0.275555556 | 0.826132128 |
| -0.044833333 | -0.112733333 | -0.2756      | 0.826106679 |

|              |              |              |             |
|--------------|--------------|--------------|-------------|
| -0.152633333 | -0.1214      | -0.276177778 | 0.825775901 |
| -0.0352      | -0.095466667 | -0.2764      | 0.825648715 |
| -0.1913      | -0.192766667 | -0.276433333 | 0.825629638 |
| -0.023666667 | -0.2957      | -0.276522222 | 0.82557877  |
| -0.0118      | -0.210533333 | -0.276811111 | 0.825413471 |
| 0.138833333  | 0.207733333  | -0.276811111 | 0.825413471 |
| 0.143733333  | 0.051066667  | -0.2769      | 0.825362616 |
| -0.099466667 | -0.2573      | -0.277033333 | 0.82528634  |
| -0.1061      | -0.0611      | -0.277133333 | 0.825229138 |
| -0.204433333 | -0.208366667 | -0.277177778 | 0.825203716 |
| 0.043566667  | -0.009366667 | -0.277211111 | 0.82518465  |
| -0.305733333 | -0.188066667 | -0.277366667 | 0.825095681 |
| -0.0278      | 0.049166667  | -0.277555556 | 0.82498766  |
| -0.025866667 | -0.315833333 | -0.277722222 | 0.824892359 |
| -0.181333333 | -0.0549      | -0.278222222 | 0.824606522 |
| -0.156466667 | -0.192833333 | -0.278288889 | 0.824568418 |
| -0.1563      | -0.1534      | -0.278366667 | 0.824523966 |
| -0.1207      | -0.287833333 | -0.278522222 | 0.824435068 |
| -0.125466667 | -0.126333333 | -0.278566667 | 0.824409671 |
| -0.062       | 0.068633333  | -0.278722222 | 0.824320785 |
| -0.0129      | 0.132466667  | -0.278755556 | 0.824301739 |
| -0.0337      | 0.058266667  | -0.278966667 | 0.824181127 |
| -0.2023      | -0.063366667 | -0.279055556 | 0.824130349 |
| -0.1311      | -0.241533333 | -0.279222222 | 0.824035147 |
| -0.258133333 | -0.310933333 | -0.279244444 | 0.824022454 |
| -0.114033333 | -0.223033333 | -0.279933333 | 0.823629076 |
| -0.1982      | -0.2136      | -0.280011111 | 0.823584674 |
| -0.232333333 | -0.0355      | -0.280222222 | 0.823464167 |
| 0.1345       | 0.158766667  | -0.280233333 | 0.823457825 |
| -0.154066667 | -0.238133333 | -0.280311111 | 0.823413432 |
| -0.251666667 | -0.382333333 | -0.280344444 | 0.823394408 |
| -0.164066667 | -0.2568      | -0.280355556 | 0.823388066 |
| -0.141866667 | 0.010666667  | -0.280744444 | 0.823166146 |
| 0.010366667  | 0.0209       | -0.280888889 | 0.823083734 |
| 0.016533333  | 0.007966667  | -0.280977778 | 0.823033023 |
| -0.2163      | -0.143833333 | -0.281       | 0.823020345 |
| 0.001666667  | -0.065166667 | -0.281111111 | 0.822956962 |
| -0.368933333 | -0.365666667 | -0.281166667 | 0.822925272 |
| -0.293933333 | -0.299566667 | -0.281244444 | 0.822880908 |
| -0.0898      | -0.112133333 | -0.281333333 | 0.822830209 |
| -0.423433333 | -0.159533333 | -0.281444444 | 0.82276684  |
| -0.158066667 | -0.230666667 | -0.281555556 | 0.822703476 |
| -0.1393      | -0.035433333 | -0.2816      | 0.822678132 |
| -0.4251      | -0.133666667 | -0.281611111 | 0.822671796 |
| -0.1547      | -0.130766667 | -0.281688889 | 0.822627446 |
| -0.1512      | -0.188333333 | -0.281722222 | 0.822608439 |
| -0.172366667 | -0.0942      | -0.281722222 | 0.822608439 |



|              |              |              |             |
|--------------|--------------|--------------|-------------|
| -0.239266667 | -0.455266667 | -0.281744444 | 0.822595768 |
| -0.088733333 | -0.273066667 | -0.281766667 | 0.822583098 |
| 0.010466667  | 0.0274       | -0.281766667 | 0.822583098 |
| -0.123566667 | -0.1152      | -0.282       | 0.822450069 |
| -0.199666667 | -0.173166667 | -0.282       | 0.822450069 |
| -0.382166667 | -0.073433333 | -0.282133333 | 0.822374062 |
| -0.2044      | -0.236766667 | -0.282211111 | 0.822329728 |
| -0.111433333 | -0.0005      | -0.2825      | 0.822165079 |
| -0.0503      | -0.008266667 | -0.282522222 | 0.822152415 |
| -0.197733333 | -0.2109      | -0.282666667 | 0.822070104 |
| -0.362633333 | -0.156833333 | -0.282744444 | 0.822025786 |
| -0.050866667 | 0.049433333  | -0.282788889 | 0.822000463 |
| -0.281466667 | -0.3064      | -0.2828      | 0.821994132 |
| -0.148566667 | -0.230066667 | -0.283011111 | 0.821873857 |
| -0.207866667 | -0.2169      | -0.283055556 | 0.821848539 |
| -0.081033333 | -0.185733333 | -0.283066667 | 0.821842209 |
| -0.234966667 | 0.0481       | -0.283077778 | 0.82183588  |
| -0.0885      | -0.059133333 | -0.283111111 | 0.821816892 |
| -0.0883      | -0.1653      | -0.283388889 | 0.821658673 |
| -0.29        | -0.084333333 | -0.283566667 | 0.82155743  |
| -0.2011      | -0.359366667 | -0.2836      | 0.821538448 |
| -0.096933333 | 0.0184       | -0.283711111 | 0.821475179 |
| -0.082633333 | -0.071833333 | -0.283822222 | 0.821411914 |
| -0.090266667 | -0.243833333 | -0.283822222 | 0.821411914 |
| -0.123933333 | -0.038766667 | -0.283822222 | 0.821411914 |
| -0.262466667 | -0.207       | -0.283888889 | 0.821373958 |
| -0.108066667 | -0.081466667 | -0.283988889 | 0.821317026 |
| -0.2005      | -0.020133333 | -0.284155556 | 0.821222149 |
| -0.124233333 | 0.032133333  | -0.284211111 | 0.821190526 |
| -0.1851      | 0.045533333  | -0.284255556 | 0.821165229 |
| -0.250366667 | -0.2194      | -0.284266667 | 0.821158904 |
| 0.383433333  | -0.0407      | -0.284355556 | 0.821108312 |
| -0.3916      | -0.215433333 | -0.284422222 | 0.821070369 |
| 0.042966667  | 0.056666667  | -0.284566667 | 0.820988167 |
| -0.240433333 | -0.064333333 | -0.2846      | 0.820969198 |
| 0.051733333  | -0.047133333 | -0.284777778 | 0.82086804  |
| -0.246766667 | -0.196133333 | -0.284933333 | 0.820779536 |
| -0.304033333 | -0.360233333 | -0.284988889 | 0.82074793  |
| -0.1236      | 0.227333333  | -0.285122222 | 0.82067208  |
| -0.107533333 | -0.098       | -0.285144444 | 0.820659439 |
| 0.2013       | 0.034133333  | -0.285444444 | 0.820488806 |
| -0.156333333 | -0.296       | -0.285555556 | 0.820425617 |
| -0.083133333 | -0.2508      | -0.285677778 | 0.820356115 |
| -0.2165      | -0.3546      | -0.285877778 | 0.820242398 |
| -0.259833333 | -0.322366667 | -0.285955556 | 0.820198178 |
| 0.049233333  | 0.006133333  | -0.286222222 | 0.820046587 |
| -0.047166667 | -0.166633333 | -0.286244444 | 0.820033956 |

|              |              |              |             |
|--------------|--------------|--------------|-------------|
| -0.1488      | -0.015366667 | -0.286255556 | 0.820027641 |
| -0.086933333 | -0.164633333 | -0.286444444 | 0.819920283 |
| -0.4293      | -0.164833333 | -0.286444444 | 0.819920283 |
| 0.0173       | 0.118433333  | -0.2866      | 0.819831882 |
| 0.0691       | -0.109566667 | -0.286622222 | 0.819819254 |
| -0.187033333 | -0.1427      | -0.286755556 | 0.81974349  |
| -0.0017      | 0.127733333  | -0.287033333 | 0.819585671 |
| -0.0998      | -0.076866667 | -0.287122222 | 0.819535175 |
| -0.0571      | -0.151833333 | -0.287144444 | 0.819522552 |
| -0.0521      | 0.035833333  | -0.287177778 | 0.819503617 |
| -0.241666667 | -0.221033333 | -0.287411111 | 0.819371086 |
| 0.0562       | -0.005366667 | -0.287422222 | 0.819364775 |
| -0.202266667 | -0.179733333 | -0.287544444 | 0.819295363 |
| -0.2232      | -0.3919      | -0.287677778 | 0.819219648 |
| -0.350766667 | -0.4205      | -0.287733333 | 0.819188102 |
| -0.2581      | -0.196733333 | -0.287755556 | 0.819175484 |
| -0.0556      | -0.0258      | -0.287933333 | 0.819074546 |
| -0.098433333 | -0.1724      | -0.287988889 | 0.819043006 |
| -0.365       | -0.213666667 | -0.288088889 | 0.818986236 |
| 0.096266667  | -0.051566667 | -0.288155556 | 0.818948392 |
| -0.1954      | -0.261233333 | -0.288255556 | 0.818891629 |
| -0.202966667 | -0.1854      | -0.288333333 | 0.818847482 |
| -0.083333333 | -0.034433333 | -0.288411111 | 0.818803338 |
| -0.0639      | -0.046866667 | -0.288633333 | 0.818677225 |
| -0.039133333 | -0.1128      | -0.288666667 | 0.81865831  |
| -0.2189      | -0.090633333 | -0.2888      | 0.818582653 |
| -0.216433333 | -0.096866667 | -0.288822222 | 0.818570045 |
| -0.041466667 | -0.130333333 | -0.288833333 | 0.81856374  |
| -0.066       | -0.0254      | -0.289155556 | 0.818380937 |
| -0.1359      | -0.0722      | -0.289477778 | 0.818198174 |
| -0.087866667 | -0.139733333 | -0.289811111 | 0.818009152 |
| -0.059933333 | -0.1455      | -0.2899      | 0.817958753 |
| 0.273166667  | 0.336233333  | -0.289966667 | 0.817920956 |
| -0.168733333 | -0.096466667 | -0.289977778 | 0.817914657 |
| -0.182633333 | -0.138166667 | -0.290011111 | 0.817895759 |
| -0.3023      | -0.188366667 | -0.290022222 | 0.81788946  |
| -0.242266667 | -0.350133333 | -0.2901      | 0.817845368 |
| -0.061366667 | -0.18        | -0.290111111 | 0.817839069 |
| 0.179733333  | -0.1901      | -0.290433333 | 0.817656427 |
| -0.120866667 | -0.067933333 | -0.290511111 | 0.817612347 |
| -0.305466667 | -0.2638      | -0.290777778 | 0.817461235 |
| 0.019233333  | 0.067133333  | -0.2908      | 0.817448643 |
| 0.119766667  | 0.1981       | -0.290811111 | 0.817442347 |
| -0.172933333 | -0.074233333 | -0.291322222 | 0.817152799 |
| -0.280733333 | -0.157       | -0.291322222 | 0.817152799 |
| -0.012766667 | 0.076533333  | -0.2916      | 0.816995479 |
| -0.022066667 | -0.028366667 | -0.291666667 | 0.816957727 |

|              |              |              |             |
|--------------|--------------|--------------|-------------|
| -0.0534      | -0.060533333 | -0.291688889 | 0.816945143 |
| -0.307033333 | -0.1598      | -0.292422222 | 0.816529989 |
| -0.176533333 | -0.2388      | -0.2925      | 0.81648597  |
| -0.0213      | -0.1412      | -0.292522222 | 0.816473393 |
| -0.3849      | -0.205933333 | -0.292566667 | 0.816448241 |
| -0.2769      | -0.395866667 | -0.292633333 | 0.816410514 |
| -0.1679      | -0.2205      | -0.292644444 | 0.816404226 |
| -0.120966667 | -0.127033333 | -0.2927      | 0.816372788 |
| -0.1742      | -0.1841      | -0.293077778 | 0.816159045 |
| -0.109366667 | -0.151066667 | -0.293088889 | 0.816152759 |
| -0.0507      | -0.140866667 | -0.293133333 | 0.816127616 |
| -0.154966667 | -0.181333333 | -0.293455556 | 0.815945357 |
| 0.232866667  | 0.032766667  | -0.293533333 | 0.815901369 |
| -0.057166667 | -0.001533333 | -0.293622222 | 0.815851101 |
| -0.268233333 | -0.1403      | -0.293722222 | 0.815794552 |
| -0.086266667 | -0.216066667 | -0.293733333 | 0.815788269 |
| -0.192833333 | -0.395666667 | -0.293777778 | 0.815763138 |
| 0.1007       | -0.223333333 | -0.2938      | 0.815750573 |
| -0.0208      | -0.113633333 | -0.293844444 | 0.815725442 |
| -0.183333333 | -0.295333333 | -0.293977778 | 0.815650057 |
| -0.222566667 | -0.282833333 | -0.2941      | 0.81558096  |
| -0.3284      | -0.2029      | -0.294255556 | 0.815493026 |
| -0.241566667 | -0.326166667 | -0.294288889 | 0.815474184 |
| -0.175666667 | -0.186333333 | -0.294366667 | 0.815430222 |
| -0.358866667 | -0.1328      | -0.294533333 | 0.815336025 |
| -0.278866667 | -0.408966667 | -0.295011111 | 0.815066055 |
| 0.091966667  | 0.0267       | -0.295066667 | 0.815034669 |
| -0.198433333 | -0.351833333 | -0.295111111 | 0.815009561 |
| -0.2813      | -0.3441      | -0.295155556 | 0.814984454 |
| -0.049466667 | -0.041833333 | -0.295377778 | 0.814858929 |
| 0.030866667  | -0.010766667 | -0.295377778 | 0.814858929 |
| -0.192566667 | -0.309733333 | -0.295388889 | 0.814852653 |
| 0.109933333  | -0.1214      | -0.295433333 | 0.814827551 |
| -0.068633333 | -0.082733333 | -0.295533333 | 0.814771073 |
| -0.059433333 | -0.1183      | -0.296166667 | 0.814413473 |
| -0.1576      | -0.219266667 | -0.296277778 | 0.814350752 |
| -0.017366667 | -0.043266667 | -0.296411111 | 0.814275494 |
| -0.321       | -0.2222      | -0.296444444 | 0.81425668  |
| 0.0144       | -0.154466667 | -0.296477778 | 0.814237867 |
| -0.258433333 | -0.3317      | -0.2966      | 0.814168889 |
| -0.2014      | -0.203333333 | -0.296655556 | 0.814137538 |
| -0.187366667 | -0.1726      | -0.296733333 | 0.814093648 |
| -0.200733333 | 0.053333333  | -0.296755556 | 0.814081108 |
| 0.027633333  | -0.139366667 | -0.296833333 | 0.814037221 |
| 0.0346       | 0.169466667  | -0.296844444 | 0.814030952 |
| -0.0204      | -0.014133333 | -0.2971      | 0.813886769 |
| -0.198933333 | -0.1264      | -0.297122222 | 0.813874232 |

|              |              |              |             |
|--------------|--------------|--------------|-------------|
| -0.088033333 | -0.2051      | -0.297133333 | 0.813867964 |
| -0.277066667 | -0.189266667 | -0.297344444 | 0.813748879 |
| -0.059966667 | 0.086        | -0.297644444 | 0.813579682 |
| -0.030433333 | -0.0966      | -0.297677778 | 0.813560885 |
| -0.2011      | -0.324433333 | -0.2977      | 0.813548353 |
| -0.272966667 | -0.031466667 | -0.297722222 | 0.813535822 |
| -0.504066667 | -0.360633333 | -0.298011111 | 0.813372934 |
| -0.293033333 | -0.175       | -0.298022222 | 0.81336667  |
| 0.061966667  | -0.317533333 | -0.298277778 | 0.813222604 |
| -0.356166667 | -0.350066667 | -0.2987      | 0.81298464  |
| 0.1145       | 0.058666667  | -0.298711111 | 0.812978379 |
| -0.1227      | -0.066       | -0.298755556 | 0.812953334 |
| -0.154333333 | -0.1379      | -0.298855556 | 0.812896986 |
| 0.044966667  | -0.1267      | -0.2989      | 0.812871944 |
| -0.1681      | -0.186266667 | -0.298966667 | 0.812834382 |
| -0.0912      | -0.296966667 | -0.299133333 | 0.812740485 |
| -0.0761      | -0.070466667 | -0.299322222 | 0.812634082 |
| -0.078966667 | -0.010066667 | -0.299533333 | 0.812515177 |
| -0.168433333 | -0.158366667 | -0.2996      | 0.812477632 |
| -0.198166667 | -0.176633333 | -0.299633333 | 0.81245886  |
| -0.161733333 | -0.0813      | -0.299677778 | 0.812433831 |
| -0.3699      | -0.441533333 | -0.299722222 | 0.812408803 |
| -0.065966667 | -0.192733333 | -0.300033333 | 0.81223363  |
| -0.0971      | 0.087566667  | -0.300088889 | 0.812202353 |
| -0.0264      | 0.034533333  | -0.300111111 | 0.812189842 |
| -0.0199      | -0.094866667 | -0.300111111 | 0.812189842 |
| -0.184666667 | -0.2607      | -0.300133333 | 0.812177332 |
| -0.078366667 | -0.132566667 | -0.300188889 | 0.812146057 |
| -0.292666667 | -0.377466667 | -0.300277778 | 0.81209602  |
| -0.264666667 | -0.11        | -0.300911111 | 0.811739593 |
| 0.021766667  | 0.1819       | -0.300977778 | 0.811702084 |
| 0.081333333  | -0.062233333 | -0.300977778 | 0.811702084 |
| -0.1511      | -0.215666667 | -0.301066667 | 0.811652074 |
| -0.2037      | -0.1945      | -0.3011      | 0.811633321 |
| -0.679333333 | -0.665266667 | -0.301311111 | 0.811514562 |
| -0.1266      | -0.104333333 | -0.301422222 | 0.811452065 |
| -0.318033333 | -0.490066667 | -0.301455556 | 0.811433317 |
| 0.265        | 0.2227       | -0.301522222 | 0.811395821 |
| -0.069366667 | 0.136166667  | -0.301866667 | 0.811202123 |
| -0.134166667 | -0.168266667 | -0.302188889 | 0.811020963 |
| -0.087066667 | -0.079933333 | -0.302222222 | 0.811002225 |
| -0.031866667 | -0.1331      | -0.302266667 | 0.810977241 |
| -0.044566667 | 0.018633333  | -0.302477778 | 0.810858579 |
| -0.2866      | -0.357966667 | -0.302644444 | 0.81076491  |
| -0.077133333 | 0.003566667  | -0.3027      | 0.81073369  |
| -0.327133333 | -0.515066667 | -0.302844444 | 0.810652522 |
| 0.065566667  | -0.081533333 | -0.302844444 | 0.810652522 |

|              |              |              |             |
|--------------|--------------|--------------|-------------|
| -0.1428      | -0.1607      | -0.302855556 | 0.810646279 |
| -0.397766667 | -0.121666667 | -0.302966667 | 0.810583848 |
| -0.1857      | -0.147833333 | -0.303088889 | 0.81051518  |
| -0.295333333 | -0.289766667 | -0.303222222 | 0.810440276 |
| -0.151766667 | -0.1758      | -0.303444444 | 0.810315451 |
| -0.1235      | -0.055366667 | -0.303544444 | 0.810259286 |
| -0.093933333 | -0.2696      | -0.303744444 | 0.810146968 |
| -0.225266667 | -0.171033333 | -0.303777778 | 0.81012825  |
| 0.039466667  | -0.061533333 | -0.303855556 | 0.810084576 |
| 0.077933333  | 0.023333333  | -0.303944444 | 0.810034666 |
| 0.0202       | -0.0231      | -0.304322222 | 0.809822582 |
| -0.215133333 | -0.224166667 | -0.304444444 | 0.809753978 |
| -0.388066667 | -0.288966667 | -0.304622222 | 0.809654201 |
| -0.134633333 | -0.054666667 | -0.304744444 | 0.809585612 |
| -0.3803      | -0.219833333 | -0.304822222 | 0.809541967 |
| -0.0866      | -0.1554      | -0.304822222 | 0.809541967 |
| -0.246066667 | -0.193933333 | -0.305033333 | 0.809423515 |
| 0.012766667  | -0.029233333 | -0.305155556 | 0.809354945 |
| -0.233366667 | -0.075033333 | -0.305166667 | 0.809348712 |
| -0.2133      | -0.196966667 | -0.305177778 | 0.809342478 |
| -0.4366      | -0.351533333 | -0.305266667 | 0.809292614 |
| 0.047433333  | 0.167833333  | -0.305266667 | 0.809292614 |
| -0.238466667 | -0.164866667 | -0.305288889 | 0.809280148 |
| -0.062833333 | 0.101066667  | -0.305322222 | 0.80926145  |
| -0.106266667 | -0.0737      | -0.305344444 | 0.809248985 |
| -0.1358      | -0.181233333 | -0.305455556 | 0.809186662 |
| -0.070566667 | -0.1107      | -0.306011111 | 0.808875119 |
| -0.105566667 | -0.128833333 | -0.306322222 | 0.808700707 |
| -0.2389      | -0.273533333 | -0.306511111 | 0.808594832 |
| -0.189866667 | -0.255366667 | -0.306788889 | 0.80843916  |
| -0.055066667 | -0.042333333 | -0.306855556 | 0.808401803 |
| 0.1051       | -0.124966667 | -0.307244444 | 0.808183922 |
| -0.412466667 | -0.3545      | -0.307544444 | 0.808015882 |
| 0.009433333  | 0.0424       | -0.307788889 | 0.807878987 |
| 0.0054       | -0.0775      | -0.307833333 | 0.807854099 |
| -0.3773      | -0.3991      | -0.307911111 | 0.807810548 |
| -0.194466667 | -0.235233333 | -0.308133333 | 0.807686128 |
| -0.225966667 | -0.172266667 | -0.3082      | 0.807648806 |
| -0.260233333 | -0.218066667 | -0.308233333 | 0.807630146 |
| -0.152833333 | -0.2161      | -0.308411111 | 0.80753063  |
| -0.458733333 | -0.234033333 | -0.308444444 | 0.807511973 |
| -0.078166667 | -0.013033333 | -0.308533333 | 0.807462221 |
| -0.176633333 | -0.123       | -0.308788889 | 0.807319202 |
| -0.0583      | -0.1002      | -0.308966667 | 0.807219725 |
| -0.1894      | -0.115933333 | -0.309133333 | 0.807126477 |
| -0.119833333 | -0.130833333 | -0.309244444 | 0.807064317 |
| -0.1546      | -0.1046      | -0.309311111 | 0.807027024 |

|              |              |              |             |
|--------------|--------------|--------------|-------------|
| -0.2682      | -0.2648      | -0.309588889 | 0.806871653 |
| -0.089       | 0.003733333  | -0.309911111 | 0.80669146  |
| -0.390566667 | -0.2177      | -0.309922222 | 0.806685248 |
| -0.211066667 | -0.3509      | -0.309966667 | 0.806660397 |
| -0.107733333 | -0.148533333 | -0.310055556 | 0.806610698 |
| -0.148433333 | -0.090933333 | -0.310355556 | 0.806442985 |
| -0.187666667 | -0.096       | -0.3106      | 0.806306356 |
| -0.229966667 | 0.026366667  | -0.310611111 | 0.806300146 |
| -0.193966667 | -0.127766667 | -0.310611111 | 0.806300146 |
| -0.217366667 | -0.198766667 | -0.310633333 | 0.806287727 |
| -0.192166667 | -0.2114      | -0.3108      | 0.806194586 |
| -0.271366667 | -0.377033333 | -0.310911111 | 0.806132498 |
| 0.0173       | -0.054466667 | -0.311455556 | 0.805828337 |
| -0.2209      | -0.145133333 | -0.311911111 | 0.805573923 |
| -0.1654      | -0.086933333 | -0.312177778 | 0.805425035 |
| -0.008766667 | -0.0531      | -0.312333333 | 0.805338197 |
| 0.0229       | -0.201633333 | -0.3124      | 0.805300983 |
| -0.1472      | -0.295266667 | -0.312477778 | 0.805257569 |
| -0.093833333 | -0.355666667 | -0.312622222 | 0.80517695  |
| -0.0486      | -0.1229      | -0.312688889 | 0.805139744 |
| -0.375033333 | -0.347866667 | -0.3128      | 0.805077737 |
| -0.128433333 | -0.1213      | -0.312888889 | 0.805028136 |
| -0.265766667 | -0.326933333 | -0.312911111 | 0.805015736 |
| -0.235366667 | -0.302166667 | -0.312933333 | 0.805003336 |
| -0.020466667 | -0.051266667 | -0.313166667 | 0.80487315  |
| -0.2437      | -0.407966667 | -0.313166667 | 0.80487315  |
| -0.256333333 | -0.3306      | -0.313233333 | 0.804835957 |
| -0.1364      | -0.1627      | -0.314466667 | 0.804148212 |
| -0.0023      | -0.145233333 | -0.314477778 | 0.804142019 |
| -0.115766667 | -0.101666667 | -0.314555556 | 0.804098668 |
| -0.240866667 | -0.361233333 | -0.314833333 | 0.803943861 |
| 0.237666667  | -0.057566667 | -0.315011111 | 0.8038448   |
| 0.109233333  | -0.0665      | -0.315111111 | 0.803789083 |
| -0.135266667 | 0.020333333  | -0.315144444 | 0.803770512 |
| 0.0203       | -0.092133333 | -0.315222222 | 0.803727181 |
| -0.1172      | -0.269933333 | -0.315233333 | 0.803720991 |
| -0.115533333 | -0.323166667 | -0.315255556 | 0.803708611 |
| 0.512333333  | 0.597866667  | -0.315355556 | 0.803652904 |
| -0.331266667 | -0.036866667 | -0.315522222 | 0.803560068 |
| -0.207033333 | -0.334933333 | -0.315855556 | 0.803374428 |
| -0.1453      | -0.2414      | -0.315955556 | 0.803318744 |
| -0.326       | -0.229166667 | -0.316       | 0.803293997 |
| -0.224466667 | -0.196266667 | -0.316088889 | 0.803244505 |
| -0.248066667 | -0.293633333 | -0.316255556 | 0.803151716 |
| -0.089633333 | -0.139633333 | -0.316388889 | 0.803077492 |
| -0.228666667 | -0.162566667 | -0.316455556 | 0.803040383 |
| -0.149466667 | -0.185666667 | -0.316511111 | 0.80300946  |

|              |              |              |             |
|--------------|--------------|--------------|-------------|
| -0.076333333 | -0.014966667 | -0.316677778 | 0.802916698 |
| -0.1511      | 0.0181       | -0.316888889 | 0.802799215 |
| -0.1616      | -0.2177      | -0.3169      | 0.802793032 |
| -0.092033333 | 0.060233333  | -0.317355556 | 0.802539577 |
| -0.144066667 | -0.108333333 | -0.317488889 | 0.80246541  |
| -0.044833333 | 0.032266667  | -0.317722222 | 0.802335634 |
| -0.1876      | -0.137933333 | -0.317733333 | 0.802329455 |
| -0.092533333 | -0.186133333 | -0.317744444 | 0.802323275 |
| 0.1061       | 0.416866667  | -0.3179      | 0.802236771 |
| -0.191333333 | -0.063633333 | -0.318011111 | 0.802174988 |
| -0.050166667 | -0.1349      | -0.3184      | 0.801958785 |
| -0.097866667 | 0.056833333  | -0.318488889 | 0.801909376 |
| -0.310866667 | -0.246133333 | -0.318522222 | 0.801890848 |
| -0.0698      | -0.177666667 | -0.318688889 | 0.801798215 |
| -0.2087      | -0.168833333 | -0.3187      | 0.80179204  |
| -0.151533333 | -0.2952      | -0.318711111 | 0.801785865 |
| -0.412266667 | -0.172666667 | -0.3188      | 0.801736466 |
| -0.0567      | 0.0234       | -0.318877778 | 0.801693244 |
| -0.126433333 | -0.289566667 | -0.318888889 | 0.80168707  |
| -0.030166667 | 0.038133333  | -0.318966667 | 0.801643851 |
| 0.154933333  | 0.081233333  | -0.319322222 | 0.801446308 |
| -0.349533333 | -0.314866667 | -0.319444444 | 0.801378414 |
| -0.141433333 | -0.000833333 | -0.319455556 | 0.801372242 |
| -0.107266667 | -0.1513      | -0.319677778 | 0.801248814 |
| -0.174333333 | -0.206833333 | -0.319944444 | 0.801100726 |
| -0.2407      | -0.3416      | -0.320044444 | 0.8010452   |
| -0.099533333 | -0.221933333 | -0.320188889 | 0.800965002 |
| -0.172       | 0.2774       | -0.320744444 | 0.800656624 |
| -0.1579      | -0.2637      | -0.320755556 | 0.800650458 |
| 0.0775       | 0.032966667  | -0.320755556 | 0.800650458 |
| 0.001533333  | 0.0687       | -0.320855556 | 0.800594963 |
| -0.110566667 | -0.157833333 | -0.320988889 | 0.800520976 |
| -0.2638      | -0.3183      | -0.321111111 | 0.80045316  |
| -0.018366667 | -0.0898      | -0.321122222 | 0.800446996 |
| -0.169533333 | -0.260566667 | -0.321233333 | 0.80038535  |
| -0.0599      | -0.051066667 | -0.321355556 | 0.800317546 |
| -0.239       | -0.300166667 | -0.3214      | 0.800292892 |
| -0.1244      | -0.054266667 | -0.3215      | 0.800237421 |
| -0.083       | -0.122133333 | -0.321644444 | 0.800157305 |
| -0.084833333 | 0.004133333  | -0.321966667 | 0.799978612 |
| -0.1134      | -0.3134      | -0.322044444 | 0.799935485 |
| -0.190466667 | -0.272466667 | -0.322322222 | 0.799781479 |
| -0.0479      | -0.088333333 | -0.322477778 | 0.799695249 |
| -0.381333333 | -0.484933333 | -0.322755556 | 0.79954129  |
| -0.0266      | -0.129766667 | -0.322822222 | 0.799504344 |
| -0.247533333 | -0.242366667 | -0.322933333 | 0.799442772 |
| -0.0351      | 0.004366667  | -0.323133333 | 0.799331953 |

|              |              |              |             |
|--------------|--------------|--------------|-------------|
| -0.107166667 | -0.181833333 | -0.323533333 | 0.799110362 |
| -0.2775      | -0.2066      | -0.323922222 | 0.798894985 |
| 0.0589       | -0.182833333 | -0.323955556 | 0.798876527 |
| -0.2891      | -0.436433333 | -0.323988889 | 0.798858069 |
| -0.189166667 | -0.373666667 | -0.324277778 | 0.79869812  |
| -0.050466667 | -0.2779      | -0.324377778 | 0.79864276  |
| -0.1949      | -0.168466667 | -0.324388889 | 0.798636609 |
| -0.222133333 | -0.316233333 | -0.324522222 | 0.798562803 |
| -0.070033333 | -0.283533333 | -0.324533333 | 0.798556653 |
| 0.109733333  | 0.092466667  | -0.324577778 | 0.798532052 |
| 0.014033333  | 0.065133333  | -0.324622222 | 0.798507453 |
| -0.375366667 | -0.2172      | -0.324677778 | 0.798476704 |
| 0.0043       | -0.1335      | -0.324766667 | 0.798427509 |
| -0.149566667 | -0.338233333 | -0.3249      | 0.798353722 |
| -0.169033333 | -0.059766667 | -0.324966667 | 0.798316831 |
| -0.229766667 | -0.088333333 | -0.325188889 | 0.798193874 |
| -0.245       | -0.436633333 | -0.3254      | 0.798077082 |
| -0.232166667 | -0.012166667 | -0.325411111 | 0.798070935 |
| -0.0298      | -0.0077      | -0.325533333 | 0.798003327 |
| -0.110333333 | -0.342133333 | -0.325655556 | 0.797935725 |
| -0.212366667 | -0.246566667 | -0.3259      | 0.797800537 |
| -0.140233333 | -0.1933      | -0.326011111 | 0.797739096 |
| -0.287133333 | -0.058233333 | -0.326166667 | 0.797653086 |
| -0.1082      | 0.0397       | -0.326244444 | 0.797610085 |
| -0.059933333 | 0.046233333  | -0.3265      | 0.79746881  |
| -0.140333333 | -0.320133333 | -0.326533333 | 0.797450385 |
| -0.242833333 | -0.207333333 | -0.326755556 | 0.797327561 |
| 0.0333       | 0.063833333  | -0.326811111 | 0.797296858 |
| -0.126433333 | -0.038033333 | -0.326933333 | 0.797229316 |
| -0.118       | -0.085533333 | -0.327       | 0.797192477 |
| -0.0713      | -0.171766667 | -0.327166667 | 0.797100387 |
| -0.1469      | -0.152433333 | -0.3272      | 0.79708197  |
| -0.1521      | -0.088066667 | -0.327222222 | 0.797069692 |
| -0.248333333 | -0.235433333 | -0.327266667 | 0.797045138 |
| -0.3178      | -0.36        | -0.327333333 | 0.797008307 |
| -0.173       | -0.248966667 | -0.327411111 | 0.796965341 |
| 0.0201       | -0.003266667 | -0.327566667 | 0.796879414 |
| -0.212833333 | 0.016533333  | -0.327666667 | 0.79682418  |
| 0.065        | 0.007666667  | -0.327811111 | 0.796744405 |
| 0.269866667  | -0.306       | -0.327877778 | 0.796707589 |
| -0.260533333 | -0.3005      | -0.328055556 | 0.79660942  |
| 0.1879       | -0.204466667 | -0.328144444 | 0.79656034  |
| -0.1479      | -0.129666667 | -0.3282      | 0.796529666 |
| -0.117666667 | -0.070233333 | -0.328255556 | 0.796498994 |
| -0.1872      | -0.217666667 | -0.3283      | 0.796474457 |
| -0.084866667 | -0.1404      | -0.328311111 | 0.796468323 |
| -0.080333333 | -0.011033333 | -0.328377778 | 0.796431519 |



|              |              |              |             |
|--------------|--------------|--------------|-------------|
| -0.2936      | -0.4148      | -0.328511111 | 0.796357916 |
| -0.192933333 | -0.2707      | -0.328655556 | 0.796278188 |
| -0.141       | -0.1875      | -0.329222222 | 0.795965485 |
| 0.109166667  | 0.025333333  | -0.329477778 | 0.795824502 |
| -0.135666667 | -0.028933333 | -0.329555556 | 0.795781599 |
| -0.316233333 | -0.2219      | -0.329733333 | 0.795683544 |
| -0.4293      | -0.4058      | -0.329855556 | 0.795616138 |
| -0.172966667 | -0.108133333 | -0.3299      | 0.795591628 |
| -0.1731      | -0.013266667 | -0.329955556 | 0.795560992 |
| 0.034833333  | -0.281933333 | -0.330022222 | 0.79552423  |
| -0.511133333 | -0.401266667 | -0.3302      | 0.795426207 |
| -0.0328      | -0.1793      | -0.330244444 | 0.795401703 |
| -0.088233333 | -0.070166667 | -0.330255556 | 0.795395577 |
| -0.3013      | -0.251       | -0.330311111 | 0.795364948 |
| 0.052166667  | -0.207366667 | -0.330522222 | 0.79524857  |
| -0.222566667 | -0.046       | -0.330522222 | 0.79524857  |
| -0.321833333 | -0.3308      | -0.330555556 | 0.795230196 |
| -0.0713      | -0.075233333 | -0.330822222 | 0.79508322  |
| -0.083266667 | -0.163666667 | -0.330888889 | 0.79504648  |
| -0.348733333 | -0.3204      | -0.330933333 | 0.795021988 |
| -0.015633333 | 0.021733333  | -0.331044444 | 0.794960761 |
| -0.151566667 | -0.019033333 | -0.331144444 | 0.79490566  |
| -0.1921      | -0.264566667 | -0.331377778 | 0.794777107 |
| -0.070366667 | -0.114533333 | -0.331555556 | 0.794679176 |
| -0.387133333 | -0.4314      | -0.331755556 | 0.794569017 |
| -0.242433333 | -0.111633333 | -0.331933333 | 0.794471112 |
| -0.146266667 | 0.020933333  | -0.332244444 | 0.794299806 |
| -0.0513      | 0.008566667  | -0.332288889 | 0.794275336 |
| -0.103566667 | -0.201033333 | -0.332355556 | 0.794238634 |
| 0.0448       | 0.123066667  | -0.3327      | 0.794049032 |
| -0.095166667 | -0.147       | -0.3327      | 0.794049032 |
| -0.037833333 | -0.056333333 | -0.332711111 | 0.794042916 |
| -0.208266667 | -0.133       | -0.332766667 | 0.79401234  |
| -0.185733333 | -0.372433333 | -0.332855556 | 0.79396342  |
| -0.269733333 | -0.133566667 | -0.3329      | 0.793938961 |
| -0.013866667 | -0.088633333 | -0.332911111 | 0.793932846 |
| 0.0379       | -0.038366667 | -0.333044444 | 0.793859474 |
| -0.0697      | -0.2364      | -0.333066667 | 0.793847247 |
| -0.2958      | -0.337466667 | -0.333166667 | 0.793792223 |
| -0.1745      | -0.0279      | -0.333188889 | 0.793779996 |
| 0.099566667  | -0.017333333 | -0.333333333 | 0.793700526 |
| -0.112833333 | 0.0888       | -0.333411111 | 0.793657738 |
| -0.012233333 | -0.013033333 | -0.333488889 | 0.793614952 |
| -0.225433333 | -0.236466667 | -0.3336      | 0.793553833 |
| -0.073233333 | -0.054333333 | -0.333611111 | 0.793547721 |
| 0.0044       | -0.241966667 | -0.333666667 | 0.793517163 |
| -0.126133333 | -0.1368      | -0.333755556 | 0.793468274 |

|              |              |              |             |
|--------------|--------------|--------------|-------------|
| 0.257966667  | 0.1957       | -0.333788889 | 0.793449941 |
| -0.2012      | -0.1475      | -0.3338      | 0.79344383  |
| -0.014533333 | 0.062633333  | -0.333888889 | 0.793394945 |
| -0.247333333 | -0.204366667 | -0.333977778 | 0.793346063 |
| -0.147933333 | -0.024633333 | -0.333977778 | 0.793346063 |
| -0.162466667 | -0.232066667 | -0.333988889 | 0.793339953 |
| -0.159333333 | -0.073766667 | -0.334322222 | 0.793156674 |
| -0.122033333 | -0.044633333 | -0.334444444 | 0.793089482 |
| -0.1289      | -0.0415      | -0.334666667 | 0.79296733  |
| -0.195233333 | -0.066833333 | -0.334777778 | 0.792906261 |
| -0.1043      | 0.196933333  | -0.334822222 | 0.792881834 |
| -0.1713      | -0.064166667 | -0.335033333 | 0.79276582  |
| -0.2124      | -0.186333333 | -0.335511111 | 0.792503323 |
| -0.157633333 | -0.136       | -0.335611111 | 0.792448392 |
| -0.0975      | -0.083666667 | -0.335833333 | 0.792326339 |
| 0.078033333  | -0.035966667 | -0.336066667 | 0.792198203 |
| 0.027933333  | 0.1135       | -0.336066667 | 0.792198203 |
| 0.001566667  | -0.0873      | -0.336144444 | 0.792155495 |
| -0.187433333 | -0.3367      | -0.336611111 | 0.791899299 |
| -0.159066667 | -0.192933333 | -0.3367      | 0.791850509 |
| -0.053966667 | 0.0432       | -0.336822222 | 0.791783428 |
| -0.3404      | -0.387433333 | -0.337033333 | 0.791667574 |
| -0.201566667 | -0.154766667 | -0.337311111 | 0.791515161 |
| -0.065966667 | -0.025833333 | -0.337322222 | 0.791509065 |
| 0.1528       | -0.0039      | -0.337488889 | 0.791417631 |
| -0.039466667 | -0.209966667 | -0.337722222 | 0.791289642 |
| -0.467466667 | -0.532766667 | -0.337877778 | 0.791204328 |
| -0.055566667 | -0.148033333 | -0.337955556 | 0.791161674 |
| -0.107333333 | -0.014733333 | -0.338044444 | 0.791112929 |
| -0.350133333 | -0.465033333 | -0.338122222 | 0.79107028  |
| -0.044366667 | -0.079566667 | -0.338466667 | 0.790881434 |
| 0.046633333  | -0.084566667 | -0.3386      | 0.790808345 |
| -0.026366667 | 0.0159       | -0.338877778 | 0.790656097 |
| 0.0067       | 0.154666667  | -0.338888889 | 0.790650007 |
| 0.067866667  | -0.1453      | -0.339166667 | 0.790497789 |
| -0.198266667 | -0.243666667 | -0.339255556 | 0.790449086 |
| -0.080066667 | -0.058066667 | -0.339688889 | 0.790211699 |
| -0.211666667 | -0.260033333 | -0.339777778 | 0.790163013 |
| -0.030266667 | -0.096033333 | -0.339822222 | 0.790138672 |
| -0.1926      | -0.065133333 | -0.3401      | 0.789986552 |
| -0.075833333 | 0.027033333  | -0.340166667 | 0.789950048 |
| -0.244766667 | -0.290133333 | -0.3402      | 0.789931796 |
| -0.159866667 | -0.256166667 | -0.340622222 | 0.789700647 |
| -0.1708      | -0.096966667 | -0.341122222 | 0.789427005 |
| -0.409566667 | -0.461       | -0.341233333 | 0.789366209 |
| 0.025566667  | -0.1573      | -0.341355556 | 0.789299338 |
| -0.3596      | -0.413166667 | -0.3418      | 0.78905622  |

|              |              |              |             |
|--------------|--------------|--------------|-------------|
| -0.054133333 | -0.0803      | -0.342244444 | 0.788813176 |
| -0.335266667 | -0.2459      | -0.342255556 | 0.788807101 |
| -0.1386      | -0.0258      | -0.342555556 | 0.78864309  |
| -0.0038      | 0.079866667  | -0.342555556 | 0.78864309  |
| -0.0864      | -0.178966667 | -0.342566667 | 0.788637016 |
| -0.220566667 | -0.211266667 | -0.342811111 | 0.788503404 |
| -0.2316      | -0.044666667 | -0.342866667 | 0.788473041 |
| -0.243933333 | -0.307333333 | -0.342933333 | 0.788436607 |
| -0.464066667 | -0.402333333 | -0.342966667 | 0.78841839  |
| -0.272466667 | -0.177066667 | -0.343044444 | 0.788375887 |
| -0.4183      | -0.4925      | -0.343255556 | 0.788260531 |
| -0.1046      | -0.190266667 | -0.343277778 | 0.788248389 |
| -0.134233333 | -0.2082      | -0.343466667 | 0.788145193 |
| 0.106233333  | -0.021133333 | -0.343477778 | 0.788139123 |
| -0.0833      | -0.0995      | -0.343688889 | 0.788023802 |
| -0.0185      | -0.0042      | -0.344111111 | 0.787793211 |
| -0.093533333 | -0.126966667 | -0.344122222 | 0.787787143 |
| -0.089466667 | -0.007133333 | -0.344266667 | 0.787708273 |
| -0.180133333 | -0.024333333 | -0.344266667 | 0.787708273 |
| -0.1024      | -0.127866667 | -0.3443      | 0.787690073 |
| -0.0149      | 0.038933333  | -0.344377778 | 0.787647609 |
| 0.058566667  | 0.083533333  | -0.344511111 | 0.787574818 |
| -0.138933333 | -0.150566667 | -0.344588889 | 0.78753236  |
| 0.0057       | -0.043166667 | -0.344655556 | 0.787495969 |
| -0.128766667 | -0.1634      | -0.345344444 | 0.787120029 |
| 0.015066667  | -0.253066667 | -0.345611111 | 0.786974551 |
| -0.277766667 | -0.201233333 | -0.346088889 | 0.786713972 |
| -0.174166667 | 0.178566667  | -0.346211111 | 0.786647326 |
| -0.2338      | -0.1825      | -0.346355556 | 0.78656857  |
| 0.0921       | 0.0922       | -0.346366667 | 0.786562512 |
| 0.048233333  | 0.001433333  | -0.346411111 | 0.786538281 |
| -0.0559      | -0.0026      | -0.346555556 | 0.786459536 |
| -0.129133333 | -0.029766667 | -0.346744444 | 0.786356573 |
| -0.141733333 | -0.040266667 | -0.346788889 | 0.786332349 |
| -0.2862      | -0.2542      | -0.346988889 | 0.786223347 |
| -0.108433333 | -0.302066667 | -0.347044444 | 0.786193072 |
| -0.317133333 | -0.3031      | -0.347055556 | 0.786187017 |
| -0.431433333 | -0.332066667 | -0.347055556 | 0.786187017 |
| -0.196566667 | -0.362833333 | -0.347266667 | 0.786071982 |
| -0.264033333 | -0.211266667 | -0.347311111 | 0.786047766 |
| 0.139133333  | 0.046466667  | -0.3478      | 0.785781442 |
| -0.078033333 | -0.3043      | -0.347911111 | 0.785720926 |
| -0.049866667 | -0.164666667 | -0.347922222 | 0.785714875 |
| 0.0376       | -0.283433333 | -0.3481      | 0.78561806  |
| -0.082466667 | -0.110966667 | -0.348166667 | 0.785581757 |
| -0.158166667 | -0.320166667 | -0.348211111 | 0.785557557 |
| -0.294266667 | -0.1074      | -0.348277778 | 0.785521257 |

|              |              |              |             |
|--------------|--------------|--------------|-------------|
| -0.1345      | -0.1457      | -0.3483      | 0.785509158 |
| -0.3988      | -0.293733333 | -0.348377778 | 0.785466811 |
| -0.331       | -0.367966667 | -0.348688889 | 0.785297447 |
| -0.386566667 | -0.326666667 | -0.3487      | 0.785291398 |
| -0.0887      | -0.108       | -0.348844444 | 0.785212778 |
| -0.0415      | -0.131733333 | -0.349311111 | 0.784958827 |
| -0.071666667 | -0.068833333 | -0.349755556 | 0.784717046 |
| -0.1445      | -0.1771      | -0.349844444 | 0.784668699 |
| -0.299266667 | -0.183966667 | -0.3499      | 0.784638483 |
| -0.194533333 | -0.141333333 | -0.349911111 | 0.78463244  |
| 0.166166667  | -0.131233333 | -0.350055556 | 0.784553886 |
| -0.3956      | -0.270766667 | -0.350144444 | 0.784505548 |
| -0.562066667 | -0.573133333 | -0.350166667 | 0.784493464 |
| -0.1137      | -0.195666667 | -0.350355556 | 0.784390759 |
| -0.1678      | -0.2213      | -0.350566667 | 0.784275987 |
| -0.226066667 | -0.191633333 | -0.350722222 | 0.784191428 |
| -0.219066667 | -0.312766667 | -0.350722222 | 0.784191428 |
| -0.149133333 | -0.240133333 | -0.350733333 | 0.784185389 |
| -0.075766667 | -0.154866667 | -0.350811111 | 0.784143113 |
| -0.283333333 | -0.341366667 | -0.351166667 | 0.783949883 |
| 0.060033333  | 0.0274       | -0.351244444 | 0.783907621 |
| -0.0094      | -0.051766667 | -0.351544444 | 0.783744629 |
| -0.3486      | -0.277566667 | -0.351855556 | 0.783575636 |
| -0.530633333 | -0.4155      | -0.351888889 | 0.783557531 |
| 0.0254       | -0.090766667 | -0.352311111 | 0.783328247 |
| -0.195533333 | -0.255266667 | -0.352366667 | 0.783298083 |
| -0.444833333 | -0.188466667 | -0.352522222 | 0.78321363  |
| -0.307033333 | -0.383266667 | -0.352533333 | 0.783207598 |
| -0.312966667 | -0.320766667 | -0.352844444 | 0.783038721 |
| -0.2143      | -0.145       | -0.352977778 | 0.782966356 |
| -0.335433333 | -0.287733333 | -0.353077778 | 0.782912087 |
| -0.258266667 | -0.191233333 | -0.3533      | 0.782791502 |
| -0.074866667 | -0.1079      | -0.353377778 | 0.782749302 |
| -0.0009      | -0.179       | -0.353477778 | 0.782695048 |
| -0.300566667 | -0.071366667 | -0.353566667 | 0.782646825 |
| 0.0232       | -0.019233333 | -0.353711111 | 0.78256847  |
| -0.154433333 | -0.2618      | -0.354144444 | 0.78233345  |
| -0.3975      | -0.380333333 | -0.354333333 | 0.782231027 |
| -0.275       | -0.3113      | -0.354533333 | 0.782122594 |
| -0.277133333 | -0.153766667 | -0.354644444 | 0.78206236  |
| -0.0467      | -0.143466667 | -0.354777778 | 0.781990086 |
| -0.011433333 | -0.148566667 | -0.354988889 | 0.781875665 |
| -0.286333333 | -0.347033333 | -0.355177778 | 0.781773302 |
| -0.037966667 | 0.0277       | -0.355177778 | 0.781773302 |
| -0.253966667 | -0.185       | -0.355355556 | 0.781676973 |
| -0.2609      | -0.020666667 | -0.355555556 | 0.781568617 |
| -0.0565      | -0.067933333 | -0.355611111 | 0.781538521 |

|              |              |              |             |
|--------------|--------------|--------------|-------------|
| -0.1824      | -0.066933333 | -0.355677778 | 0.781502407 |
| -0.058266667 | 0.151166667  | -0.3557      | 0.78149037  |
| -0.216       | -0.226366667 | -0.355944444 | 0.781357968 |
| -0.0798      | -0.0628      | -0.356222222 | 0.781207539 |
| -0.099233333 | -0.1236      | -0.356311111 | 0.781159408 |
| -0.036066667 | 0.0346       | -0.356433333 | 0.781093233 |
| -0.148466667 | -0.118166667 | -0.356588889 | 0.781009018 |
| -0.4597      | -0.2889      | -0.356644444 | 0.780978943 |
| -0.2392      | -0.274633333 | -0.357366667 | 0.780588078 |
| -0.427633333 | -0.219466667 | -0.357633333 | 0.780443808 |
| -0.046933333 | -0.0374      | -0.357988889 | 0.780251489 |
| -0.103033333 | 0.062733333  | -0.358233333 | 0.780119298 |
| 0.012666667  | -0.028433333 | -0.358555556 | 0.77994508  |
| -0.223966667 | -0.211166667 | -0.3587      | 0.779866995 |
| 0.089        | -0.0226      | -0.358844444 | 0.779788917 |
| -0.381       | -0.271066667 | -0.359111111 | 0.779644795 |
| 0.2615       | 0.162433333  | -0.359155556 | 0.779620777 |
| -0.070866667 | -0.123566667 | -0.359255556 | 0.77956674  |
| -0.053833333 | 0.004333333  | -0.3593      | 0.779542724 |
| -0.251533333 | -0.0708      | -0.359355556 | 0.779512706 |
| 0.044        | -0.024566667 | -0.359455556 | 0.779458676 |
| -0.135466667 | -0.072433333 | -0.359466667 | 0.779452673 |
| -0.1624      | 0.009833333  | -0.359611111 | 0.779374637 |
| -0.378166667 | -0.4079      | -0.359666667 | 0.779344626 |
| -0.0397      | -0.1638      | -0.359822222 | 0.779260599 |
| -0.136166667 | -0.095733333 | -0.360066667 | 0.779128575 |
| -0.543533333 | -0.471833333 | -0.360188889 | 0.779062572 |
| -0.140033333 | -0.1455      | -0.3603      | 0.779002574 |
| -0.172133333 | -0.208833333 | -0.360877778 | 0.778690657 |
| -0.255633333 | -0.251666667 | -0.360988889 | 0.778630688 |
| -0.153166667 | -0.166766667 | -0.361011111 | 0.778618694 |
| -0.231066667 | -0.112066667 | -0.361066667 | 0.778588712 |
| -0.302       | -0.246       | -0.361133333 | 0.778552734 |
| -0.1907      | -0.2934      | -0.361188889 | 0.778522754 |
| -0.445       | -0.318433333 | -0.361222222 | 0.778504767 |
| -0.094533333 | -0.1634      | -0.361466667 | 0.778372871 |
| 0.0275       | -0.037966667 | -0.361511111 | 0.778348892 |
| -0.129833333 | -0.225066667 | -0.361555556 | 0.778324915 |
| -0.0469      | 0.1083       | -0.361711111 | 0.778240998 |
| -0.148133333 | -0.035833333 | -0.362011111 | 0.778079184 |
| 0.190733333  | 0.0161       | -0.362022222 | 0.778073192 |
| -0.138466667 | -0.1845      | -0.362166667 | 0.777995294 |
| -0.338833333 | -0.4226      | -0.362233333 | 0.777959344 |
| 0.079033333  | 0.209833333  | -0.362577778 | 0.777773627 |
| -0.3726      | -0.299466667 | -0.362788889 | 0.777659823 |
| -0.226833333 | -0.1835      | -0.362877778 | 0.777611911 |
| -0.161833333 | -0.278233333 | -0.363122222 | 0.777480167 |

|              |              |              |             |
|--------------|--------------|--------------|-------------|
| -0.096366667 | -0.1055      | -0.363133333 | 0.777474179 |
| -0.1735      | -0.079633333 | -0.363155556 | 0.777462203 |
| -0.028833333 | 0.1228       | -0.363288889 | 0.777390354 |
| -0.2827      | -0.2294      | -0.363422222 | 0.777318511 |
| 0.0043       | 0.028333333  | -0.363433333 | 0.777312524 |
| -0.148733333 | -0.019433333 | -0.363466667 | 0.777294565 |
| -0.272166667 | -0.460833333 | -0.3635      | 0.777276606 |
| -0.260766667 | -0.313366667 | -0.363611111 | 0.777216745 |
| -0.092666667 | -0.0613      | -0.3638      | 0.777114992 |
| 0.088666667  | -0.052766667 | -0.363844444 | 0.777091052 |
| -0.311166667 | -0.2624      | -0.364544444 | 0.776714097 |
| -0.1872      | -0.202566667 | -0.3646      | 0.776684188 |
| -0.116266667 | -0.018566667 | -0.364688889 | 0.776636335 |
| -0.288833333 | -0.0956      | -0.364855556 | 0.77654662  |
| -0.0298      | -0.060666667 | -0.365055556 | 0.776438975 |
| -0.019566667 | -0.068666667 | -0.365088889 | 0.776421036 |
| -0.052266667 | -0.0011      | -0.365122222 | 0.776403097 |
| -0.183366667 | -0.1714      | -0.365177778 | 0.7763732   |
| 0.0329       | 0.014066667  | -0.365277778 | 0.776319387 |
| -0.046066667 | -0.452466667 | -0.3653      | 0.77630743  |
| -0.211466667 | -0.291733333 | -0.365377778 | 0.776265579 |
| -0.3264      | -0.1373      | -0.365766667 | 0.776056359 |
| -0.162966667 | -0.0485      | -0.365822222 | 0.776026475 |
| -0.036966667 | 0.044166667  | -0.365944444 | 0.775960735 |
| -0.0957      | -0.094666667 | -0.366655556 | 0.775578354 |
| -0.221366667 | -0.303166667 | -0.366666667 | 0.775572381 |
| -0.1183      | -0.274333333 | -0.366788889 | 0.775506679 |
| -0.4199      | -0.386966667 | -0.367066667 | 0.775357376 |
| -0.087466667 | -0.213566667 | -0.367455556 | 0.775148401 |
| 0.2832       | 0.2317       | -0.367633333 | 0.775052889 |
| -0.305633333 | -0.210433333 | -0.367911111 | 0.774903674 |
| -0.083866667 | -0.105466667 | -0.368377778 | 0.774653057 |
| 0.000266667  | 0.072066667  | -0.368433333 | 0.774623227 |
| 0.031666667  | 0.018766667  | -0.3687      | 0.77448006  |
| -0.3114      | -0.207566667 | -0.369033333 | 0.774301137 |
| 0.124666667  | 0.097233333  | -0.3692      | 0.774211692 |
| -0.168366667 | -0.122366667 | -0.369222222 | 0.774199767 |
| -0.285033333 | -0.239766667 | -0.369233333 | 0.774193804 |
| -0.114166667 | 0.021566667  | -0.369788889 | 0.773895733 |
| -0.280133333 | -0.2962      | -0.369855556 | 0.773859973 |
| -0.439033333 | -0.298033333 | -0.3699      | 0.773836133 |
| -0.072166667 | -0.054433333 | -0.370277778 | 0.773633526 |
| -0.3911      | -0.401033333 | -0.370333333 | 0.773603736 |
| -0.144666667 | -0.207433333 | -0.3707      | 0.773407146 |
| -0.1713      | -0.107533333 | -0.370711111 | 0.77340119  |
| -0.2018      | -0.0269      | -0.370988889 | 0.773252293 |
| 0.05         | -0.2147      | -0.371066667 | 0.773210607 |

|              |              |              |             |
|--------------|--------------|--------------|-------------|
| -0.302833333 | -0.352933333 | -0.3711      | 0.773192742 |
| -0.304633333 | -0.429233333 | -0.371144444 | 0.773168923 |
| -0.4344      | -0.2929      | -0.371166667 | 0.773157014 |
| -0.3277      | -0.206233333 | -0.371677778 | 0.772883152 |
| -0.010066667 | -0.264766667 | -0.371922222 | 0.772752209 |
| -0.001766667 | -0.050866667 | -0.372022222 | 0.772698647 |
| -0.191833333 | -0.1915      | -0.372244444 | 0.772579636 |
| -0.296366667 | -0.169       | -0.372322222 | 0.772537986 |
| 0.317766667  | 0.379033333  | -0.372511111 | 0.772436846 |
| -0.296533333 | -0.176866667 | -0.373133333 | 0.772103772 |
| 0.156733333  | 0.259366667  | -0.373133333 | 0.772103772 |
| -0.239266667 | -0.195833333 | -0.3735      | 0.771907564 |
| -0.1259      | -0.2063      | -0.373833333 | 0.771729236 |
| -0.097266667 | -0.391266667 | -0.373911111 | 0.771687632 |
| -0.287633333 | -0.1273      | -0.374033333 | 0.771622259 |
| -0.293633333 | -0.287666667 | -0.374322222 | 0.771467763 |
| 0.0176       | -0.0034      | -0.374444444 | 0.771402409 |
| -0.143033333 | -0.150066667 | -0.374833333 | 0.771194499 |
| -0.3448      | -0.292466667 | -0.375       | 0.771105413 |
| -0.113033333 | -0.062766667 | -0.375066667 | 0.771069781 |
| -0.159633333 | -0.1869      | -0.375211111 | 0.770992584 |
| -0.213966667 | -0.211066667 | -0.375244444 | 0.770974771 |
| -0.116566667 | -0.062966667 | -0.375277778 | 0.770956958 |
| -0.070566667 | -0.0544      | -0.375444444 | 0.770867898 |
| 0.0254       | -0.0708      | -0.375477778 | 0.770850088 |
| -0.132966667 | 0.017333333  | -0.375666667 | 0.770749169 |
| -0.091366667 | -0.183566667 | -0.375711111 | 0.770725425 |
| -0.205166667 | -0.065833333 | -0.376144444 | 0.770493962 |
| -0.228633333 | -0.263033333 | -0.376211111 | 0.770458358 |
| -0.366066667 | -0.320566667 | -0.376233333 | 0.770446491 |
| -0.019233333 | 0.0326       | -0.376355556 | 0.770381223 |
| -0.466833333 | -0.309933333 | -0.3764      | 0.77035749  |
| 0.0776       | -0.068666667 | -0.376611111 | 0.770244771 |
| -0.118266667 | -0.0377      | -0.376677778 | 0.770209179 |
| -0.241733333 | -0.3053      | -0.376911111 | 0.77008462  |
| -0.308366667 | -0.246833333 | -0.377022222 | 0.770025313 |
| -0.135766667 | -0.243966667 | -0.377233333 | 0.769912643 |
| -0.2546      | -0.291733333 | -0.377444444 | 0.769799989 |
| -0.326533333 | -0.2813      | -0.377511111 | 0.769764417 |
| -0.291666667 | -0.1241      | -0.377522222 | 0.769758489 |
| -0.175166667 | -0.0656      | -0.377544444 | 0.769746632 |
| -0.044366667 | -0.0803      | -0.377577778 | 0.769728848 |
| -0.140766667 | -0.274566667 | -0.377822222 | 0.769598439 |
| -0.3741      | -0.0438      | -0.377922222 | 0.769545096 |
| -0.172166667 | -0.161733333 | -0.378333333 | 0.769325838 |
| -0.057       | -0.1097      | -0.378511111 | 0.769231042 |
| 0.084666667  | -0.104566667 | -0.378533333 | 0.769219194 |

|              |              |              |             |
|--------------|--------------|--------------|-------------|
| -0.3909      | -0.2844      | -0.378744444 | 0.769106641 |
| -0.1616      | -0.0755      | -0.378811111 | 0.769071102 |
| -0.032533333 | 0.084566667  | -0.378866667 | 0.769041487 |
| -0.194166667 | -0.1358      | -0.378888889 | 0.769029641 |
| -0.180166667 | -0.181133333 | -0.379266667 | 0.768828293 |
| -0.020866667 | 0.018533333  | -0.379422222 | 0.7687454   |
| -0.1162      | -0.143366667 | -0.379555556 | 0.768674356 |
| -0.127733333 | -0.289366667 | -0.380022222 | 0.768425754 |
| -0.2155      | -0.412833333 | -0.380022222 | 0.768425754 |
| -0.208066667 | -0.334533333 | -0.380422222 | 0.768212731 |
| -0.3232      | -0.237033333 | -0.380566667 | 0.76813582  |
| 0.1717       | 0.280733333  | -0.380622222 | 0.768106241 |
| 0.045866667  | -0.235766667 | -0.380688889 | 0.768070748 |
| -0.078933333 | -0.128233333 | -0.380877778 | 0.767970193 |
| 0.030733333  | -0.1798      | -0.381033333 | 0.767887393 |
| -0.233966667 | -0.078766667 | -0.381066667 | 0.767869651 |
| -0.251766667 | -0.2114      | -0.381222222 | 0.767786861 |
| -0.254233333 | -0.090933333 | -0.381377778 | 0.767704081 |
| -0.1362      | -0.205       | -0.381411111 | 0.767686343 |
| -0.113       | 0.068833333  | -0.381833333 | 0.767461704 |
| -0.045133333 | -0.026033333 | -0.381844444 | 0.767455793 |
| -0.043966667 | 0.1587       | -0.381944444 | 0.767402599 |
| -0.057033333 | 0.1756       | -0.382044444 | 0.767349408 |
| -0.329566667 | -0.207233333 | -0.382133333 | 0.767302131 |
| -0.038833333 | -0.106066667 | -0.382422222 | 0.7671485   |
| -0.3061      | -0.337533333 | -0.382655556 | 0.767024436 |
| -0.2334      | -0.231733333 | -0.382811111 | 0.766941737 |
| -0.3673      | -0.107966667 | -0.382822222 | 0.766935831 |
| -0.219933333 | -0.002066667 | -0.382877778 | 0.766906298 |
| -0.271233333 | -0.221566667 | -0.383033333 | 0.766823612 |
| -0.298333333 | -0.337666667 | -0.383511111 | 0.766569705 |
| -0.043833333 | -0.067433333 | -0.383566667 | 0.766540186 |
| -0.038733333 | -0.203666667 | -0.383644444 | 0.766498862 |
| -0.0998      | 0.054833333  | -0.383733333 | 0.766451637 |
| 0.013233333  | 0.038533333  | -0.3838      | 0.766416221 |
| -0.2864      | -0.106233333 | -0.3838      | 0.766416221 |
| 0.154233333  | 0.183        | -0.383833333 | 0.766398513 |
| -0.1622      | -0.096633333 | -0.3841      | 0.766256865 |
| -0.3042      | -0.256666667 | -0.384222222 | 0.766191952 |
| -0.347566667 | -0.448733333 | -0.384322222 | 0.766138846 |
| -0.1042      | 0.1325       | -0.384355556 | 0.766121144 |
| -0.1601      | -0.184333333 | -0.384955556 | 0.76580259  |
| -0.139733333 | -0.024366667 | -0.385022222 | 0.765767203 |
| 0.021533333  | -0.069366667 | -0.385222222 | 0.765661053 |
| -0.082733333 | -0.134133333 | -0.385366667 | 0.765584398 |
| 0.0072       | -0.129633333 | -0.385422222 | 0.765554917 |
| -0.075533333 | -0.0142      | -0.385477778 | 0.765525437 |



|              |              |              |             |
|--------------|--------------|--------------|-------------|
| 0.014766667  | -0.0097      | -0.385588889 | 0.765466482 |
| 0.0726       | 0.096166667  | -0.386488889 | 0.764989108 |
| -0.274533333 | -0.2714      | -0.387155556 | 0.764635689 |
| -0.149033333 | -0.233933333 | -0.387333333 | 0.764541472 |
| -0.136466667 | -0.161733333 | -0.387333333 | 0.764541472 |
| -0.164366667 | -0.1385      | -0.3876      | 0.764400168 |
| -0.327566667 | -0.4723      | -0.387977778 | 0.764200031 |
| -0.066433333 | -0.268733333 | -0.388466667 | 0.763941109 |
| -0.088533333 | -0.068       | -0.388488889 | 0.763929342 |
| -0.099766667 | -0.052033333 | -0.388811111 | 0.76375874  |
| -0.1641      | -0.1445      | -0.388811111 | 0.76375874  |
| -0.179466667 | -0.2103      | -0.388811111 | 0.76375874  |
| -0.097066667 | -0.188466667 | -0.388877778 | 0.763723447 |
| -0.287966667 | -0.271166667 | -0.388977778 | 0.763670512 |
| -0.1732      | -0.2407      | -0.389355556 | 0.763470567 |
| -0.201966667 | 0.019766667  | -0.389544444 | 0.763370614 |
| -0.033266667 | -0.1006      | -0.39        | 0.763129604 |
| 0.003866667  | -0.0654      | -0.3907      | 0.762759422 |
| -0.105       | -0.174866667 | -0.3907      | 0.762759422 |
| -0.098833333 | -0.074566667 | -0.390711111 | 0.762753547 |
| -0.468033333 | -0.354633333 | -0.390755556 | 0.76273005  |
| -0.3043      | -0.3373      | -0.390922222 | 0.762641941 |
| -0.123466667 | -0.131666667 | -0.390977778 | 0.762612573 |
| -0.0455      | 0.1408       | -0.391011111 | 0.762594953 |
| -0.116766667 | -0.141033333 | -0.391077778 | 0.762559715 |
| -0.208433333 | -0.242       | -0.391088889 | 0.762553842 |
| -0.1291      | -0.0032      | -0.391377778 | 0.762401161 |
| -0.223433333 | -0.3498      | -0.391588889 | 0.762289607 |
| -0.314133333 | -0.313333333 | -0.391844444 | 0.762154588 |
| -0.1955      | -0.190733333 | -0.391855556 | 0.762148719 |
| -0.273433333 | -0.068833333 | -0.392033333 | 0.762054808 |
| -0.256633333 | -0.228233333 | -0.392322222 | 0.761902227 |
| -0.0377      | -0.016066667 | -0.392344444 | 0.761890492 |
| -0.167566667 | -0.243933333 | -0.3925      | 0.761808347 |
| -0.234233333 | -0.170633333 | -0.3929      | 0.761597158 |
| -0.210733333 | -0.073       | -0.393177778 | 0.761450533 |
| -0.352       | -0.3157      | -0.393266667 | 0.76140362  |
| -0.306066667 | -0.182366667 | -0.393322222 | 0.7613743   |
| -0.057533333 | -0.073766667 | -0.393533333 | 0.761262895 |
| -0.363066667 | -0.197866667 | -0.393644444 | 0.761204268 |
| -0.2309      | -0.4441      | -0.393666667 | 0.761192543 |
| -0.037433333 | -0.085133333 | -0.3938      | 0.761122197 |
| -0.248266667 | -0.045466667 | -0.393833333 | 0.761104612 |
| -0.766       | -0.6811      | -0.393844444 | 0.76109875  |
| -0.148766667 | -0.262266667 | -0.393922222 | 0.761057719 |
| -0.157033333 | -0.3644      | -0.394277778 | 0.760870178 |
| -0.099333333 | -0.073066667 | -0.394922222 | 0.760530377 |

|              |              |              |             |
|--------------|--------------|--------------|-------------|
| -0.174166667 | 0.017966667  | -0.395177778 | 0.76039567  |
| 0.038166667  | -0.060966667 | -0.395188889 | 0.760389814 |
| -0.454633333 | -0.5527      | -0.395722222 | 0.760108766 |
| -0.041566667 | 0.0634       | -0.395844444 | 0.760044374 |
| -0.3897      | -0.2547      | -0.395855556 | 0.76003852  |
| -0.171033333 | -0.172366667 | -0.396166667 | 0.759874639 |
| 0.054233333  | -0.021433333 | -0.396355556 | 0.759775157 |
| -0.213533333 | -0.440833333 | -0.396455556 | 0.759722495 |
| -0.255233333 | -0.2603      | -0.396722222 | 0.759582081 |
| -0.067366667 | -0.084366667 | -0.396822222 | 0.759529433 |
| -0.313333333 | -0.315633333 | -0.396866667 | 0.759506035 |
| -0.412133333 | -0.3062      | -0.396877778 | 0.759500186 |
| -0.3952      | -0.367766667 | -0.396911111 | 0.759482638 |
| -0.056533333 | -0.079933333 | -0.396966667 | 0.759453392 |
| -0.319366667 | -0.179133333 | -0.397311111 | 0.759272093 |
| 0.0655       | -0.153866667 | -0.3974      | 0.759225314 |
| -0.413166667 | -0.311233333 | -0.397822222 | 0.75900315  |
| -0.290466667 | -0.5057      | -0.3981      | 0.758857025 |
| -0.0694      | -0.090266667 | -0.398233333 | 0.758786895 |
| -0.265       | -0.2278      | -0.398344444 | 0.758728458 |
| -0.3377      | -0.320366667 | -0.398388889 | 0.758705084 |
| -0.216033333 | -0.1252      | -0.398422222 | 0.758687555 |
| -0.115666667 | -0.1232      | -0.398688889 | 0.758547333 |
| -0.4         | -0.1928      | -0.398733333 | 0.758523965 |
| -0.2317      | -0.1879      | -0.398811111 | 0.758483073 |
| -0.349933333 | -0.332833333 | -0.398911111 | 0.7584305   |
| -0.042866667 | -0.131266667 | -0.399077778 | 0.758342888 |
| -0.1979      | -0.2357      | -0.399744444 | 0.75799254  |
| -0.316366667 | -0.3238      | -0.399922222 | 0.757899142 |
| -0.160933333 | -0.1241      | -0.400133333 | 0.757788246 |
| -0.1794      | -0.102966667 | -0.400155556 | 0.757776573 |
| -0.071033333 | -0.028       | -0.400433333 | 0.757630684 |
| -0.354833333 | -0.196566667 | -0.400455556 | 0.757619014 |
| -0.140366667 | 0.0944       | -0.400944444 | 0.757362322 |
| -0.158266667 | -0.0894      | -0.400988889 | 0.757338991 |
| -0.055       | -0.125033333 | -0.401022222 | 0.757321493 |
| -0.2688      | -0.301566667 | -0.401288889 | 0.757181523 |
| -0.138566667 | 0.1242       | -0.401355556 | 0.757146534 |
| -0.2928      | -0.138866667 | -0.401644444 | 0.756994937 |
| 0.000566667  | -0.073133333 | -0.401822222 | 0.756901661 |
| -0.2693      | -0.220833333 | -0.402066667 | 0.756773425 |
| -0.102966667 | -0.048       | -0.402344444 | 0.75662773  |
| -0.004033333 | -0.123966667 | -0.403111111 | 0.756225755 |
| -0.346733333 | -0.3104      | -0.403577778 | 0.755981179 |
| -0.245766667 | -0.176766667 | -0.403644444 | 0.755946246 |
| -0.2878      | -0.2544      | -0.403855556 | 0.755835636 |
| -0.0617      | 0.202        | -0.404033333 | 0.755742503 |

|              |              |              |             |
|--------------|--------------|--------------|-------------|
| -0.214233333 | -0.209866667 | -0.404155556 | 0.75567848  |
| -0.1047      | -0.195233333 | -0.404322222 | 0.755591186 |
| -0.1092      | -0.1961      | -0.404677778 | 0.755404992 |
| -0.191533333 | -0.3155      | -0.404688889 | 0.755399174 |
| -0.0997      | -0.118733333 | -0.404755556 | 0.755364268 |
| -0.186233333 | -0.062866667 | -0.404955556 | 0.755259559 |
| -0.247966667 | -0.299366667 | -0.405388889 | 0.755032741 |
| -0.2631      | -0.345266667 | -0.405544444 | 0.754951335 |
| -0.327666667 | -0.341133333 | -0.405822222 | 0.75480599  |
| 0.040633333  | -0.003066667 | -0.405833333 | 0.754800177 |
| -0.174933333 | -0.230366667 | -0.406222222 | 0.754596743 |
| -0.019266667 | 0.031866667  | -0.406355556 | 0.754527006 |
| 0.236566667  | -0.033833333 | -0.406444444 | 0.754480519 |
| -0.108266667 | -0.1626      | -0.406555556 | 0.754422414 |
| -0.130233333 | -0.114933333 | -0.406677778 | 0.754358504 |
| -0.175333333 | -0.234633333 | -0.406866667 | 0.754259744 |
| -0.199566667 | -0.209066667 | -0.407044444 | 0.754166805 |
| -0.172733333 | -0.118466667 | -0.407222222 | 0.754073877 |
| -0.3864      | -0.3695      | -0.407788889 | 0.753777748 |
| -0.1795      | -0.0638      | -0.408555556 | 0.753377287 |
| -0.247466667 | -0.043633333 | -0.4086      | 0.753354078 |
| -0.400866667 | -0.127833333 | -0.408711111 | 0.75329606  |
| -0.249366667 | -0.320433333 | -0.409133333 | 0.753075631 |
| -0.1356      | -0.062266667 | -0.409166667 | 0.753058232 |
| 0.046733333  | 0.104866667  | -0.409244444 | 0.753017634 |
| -0.114566667 | -0.026266667 | -0.409277778 | 0.753000236 |
| -0.023133333 | -0.083366667 | -0.409566667 | 0.752849468 |
| -0.353633333 | -0.304933333 | -0.409877778 | 0.752687137 |
| -0.092533333 | -0.191666667 | -0.4099      | 0.752675543 |
| -0.173633333 | -0.241866667 | -0.410066667 | 0.752588596 |
| -0.171266667 | -0.0845      | -0.410133333 | 0.75255382  |
| -0.1071      | -0.1877      | -0.410266667 | 0.752484272 |
| -0.0226      | -0.023533333 | -0.411       | 0.752101876 |
| -0.1116      | -0.094266667 | -0.411066667 | 0.752067122 |
| -0.018433333 | -0.168       | -0.411222222 | 0.751986036 |
| -0.236733333 | -0.158266667 | -0.411344444 | 0.751922332 |
| -0.139566667 | -0.144666667 | -0.411355556 | 0.751916541 |
| -0.048233333 | -0.1602      | -0.411833333 | 0.75166757  |
| -0.1591      | -0.002433333 | -0.411988889 | 0.751586527 |
| -0.3626      | -0.376566667 | -0.412088889 | 0.751534433 |
| -0.169966667 | -0.200466667 | -0.412411111 | 0.751366599 |
| -0.3063      | -0.4605      | -0.412455556 | 0.751343452 |
| -0.276933333 | -0.186       | -0.412533333 | 0.751302947 |
| 0.033733333  | 0.151133333  | -0.412666667 | 0.751233515 |
| -0.100433333 | -0.225633333 | -0.413011111 | 0.751054179 |
| -0.290766667 | -0.141233333 | -0.413011111 | 0.751054179 |
| -0.170133333 | -0.380966667 | -0.4134      | 0.750851754 |

|              |              |              |             |
|--------------|--------------|--------------|-------------|
| -0.0473      | -0.105366667 | -0.413888889 | 0.750597355 |
| 0.123033333  | -0.047666667 | -0.414688889 | 0.750181251 |
| -0.088       | 0.195566667  | -0.414944444 | 0.750048377 |
| -0.1158      | 0.075733333  | -0.414966667 | 0.750036824 |
| -0.3601      | -0.359933333 | -0.4152      | 0.749915527 |
| -0.280466667 | -0.324066667 | -0.4153      | 0.749863549 |
| -0.5105      | -0.3483      | -0.4159      | 0.749551754 |
| -0.081733333 | 0.0232       | -0.415911111 | 0.749545981 |
| -0.289933333 | -0.325166667 | -0.416255556 | 0.749367048 |
| -0.2592      | -0.291633333 | -0.416344444 | 0.749320879 |
| 0.1162       | 0.051833333  | -0.416388889 | 0.749297795 |
| 0.0178       | -0.001233333 | -0.416488889 | 0.749245859 |
| -0.139266667 | -0.1654      | -0.416488889 | 0.749245859 |
| -0.166733333 | -0.0993      | -0.416977778 | 0.748992004 |
| -0.290166667 | -0.2021      | -0.417155556 | 0.748899714 |
| -0.223966667 | -0.253033333 | -0.417188889 | 0.748882411 |
| -0.056366667 | -0.059266667 | -0.417455556 | 0.748744001 |
| -0.420433333 | -0.4599      | -0.417655556 | 0.74864021  |
| -0.236966667 | -0.2832      | -0.417711111 | 0.748611382 |
| -0.150533333 | -0.2942      | -0.417877778 | 0.748524904 |
| -0.2391      | -0.423566667 | -0.4181      | 0.748409616 |
| -0.061466667 | 0.0889       | -0.4182      | 0.748357742 |
| 0.1756       | 0.188766667  | -0.418288889 | 0.748311635 |
| 0.0222       | 0.066333333  | -0.418344444 | 0.748282819 |
| -0.123166667 | -0.3465      | -0.418433333 | 0.748236716 |
| -0.3124      | -0.298133333 | -0.418855556 | 0.748017768 |
| -0.489433333 | -0.3848      | -0.418988889 | 0.74794864  |
| 0.0337       | -0.0812      | -0.419188889 | 0.747844959 |
| -0.2914      | -0.262633333 | -0.419333333 | 0.747770088 |
| 0.0294       | 0.031433333  | -0.419333333 | 0.747770088 |
| -0.430866667 | -0.317833333 | -0.420177778 | 0.747332528 |
| -0.145766667 | -0.0502      | -0.4204      | 0.747217423 |
| -0.3492      | -0.357333333 | -0.420455556 | 0.74718865  |
| -0.421066667 | -0.339933333 | -0.420833333 | 0.74699302  |
| -0.3034      | -0.252466667 | -0.420877778 | 0.746970008 |
| -0.1761      | -0.381966667 | -0.421077778 | 0.746866463 |
| -0.247866667 | -0.175433333 | -0.421788889 | 0.74649842  |
| -0.273933333 | -0.312833333 | -0.421811111 | 0.746486921 |
| 0.021433333  | 0.0611       | -0.421977778 | 0.746400689 |
| -0.4194      | -0.337466667 | -0.422033333 | 0.746371947 |
| -0.071233333 | -0.1489      | -0.422355556 | 0.746205265 |
| -0.383066667 | -0.618333333 | -0.4224      | 0.746182277 |
| 0.184666667  | 0.230533333  | -0.422533333 | 0.746113319 |
| -0.028566667 | -0.069733333 | -0.422633333 | 0.746061604 |
| -0.377933333 | -0.173733333 | -0.422888889 | 0.74592946  |
| -0.086566667 | -0.1108      | -0.422966667 | 0.745889247 |
| -0.137466667 | -0.174       | -0.423211111 | 0.745762877 |

|              |              |              |             |
|--------------|--------------|--------------|-------------|
| -0.282033333 | -0.290966667 | -0.423666667 | 0.745527427 |
| -0.287266667 | -0.0621      | -0.423744444 | 0.745487236 |
| -0.034266667 | -0.146233333 | -0.424044444 | 0.745332232 |
| -0.3822      | -0.207266667 | -0.424166667 | 0.745269092 |
| -0.3217      | -0.225233333 | -0.424666667 | 0.745010846 |
| 0.0022       | -0.194       | -0.424711111 | 0.744987895 |
| -0.109033333 | -0.1128      | -0.424844444 | 0.744919047 |
| -0.086833333 | 0.0055       | -0.425166667 | 0.744752689 |
| -0.0566      | 0.000333333  | -0.425244444 | 0.74471254  |
| -0.1598      | -0.018966667 | -0.425411111 | 0.744626512 |
| -0.1185      | 0.102333333  | -0.425577778 | 0.744540495 |
| -0.371633333 | -0.2393      | -0.425777778 | 0.744437286 |
| -0.1762      | -0.139366667 | -0.425866667 | 0.744391421 |
| -0.2651      | -0.404566667 | -0.426133333 | 0.744253841 |
| -0.516433333 | -0.228666667 | -0.426144444 | 0.744248109 |
| -0.250666667 | -0.3323      | -0.426322222 | 0.744156404 |
| -0.228033333 | -0.301333333 | -0.426488889 | 0.74407044  |
| -0.404433333 | -0.322666667 | -0.426533333 | 0.744047518 |
| -0.393166667 | -0.295366667 | -0.4266      | 0.744013137 |
| -0.120733333 | -0.1625      | -0.426877778 | 0.743869898 |
| -0.334833333 | -0.339766667 | -0.427333333 | 0.743635045 |
| -0.2895      | -0.432733333 | -0.427555556 | 0.74352051  |
| -0.1476      | 0.0489       | -0.428344444 | 0.743114052 |
| -0.270166667 | -0.024466667 | -0.428477778 | 0.743045377 |
| -0.084033333 | -0.025466667 | -0.428555556 | 0.743005319 |
| -0.3187      | -0.4373      | -0.4291      | 0.742724977 |
| 0.080833333  | 0.081166667  | -0.429522222 | 0.742507641 |
| -0.0882      | 0.003066667  | -0.429766667 | 0.742381844 |
| -0.303366667 | -0.348033333 | -0.429777778 | 0.742376127 |
| -0.139766667 | -0.2811      | -0.430077778 | 0.74222177  |
| -0.224933333 | -0.133333333 | -0.430144444 | 0.742187473 |
| -0.3953      | -0.304866667 | -0.430266667 | 0.742124599 |
| -0.180733333 | -0.172366667 | -0.430555556 | 0.741976009 |
| -0.126366667 | -0.1211      | -0.430711111 | 0.741896011 |
| -0.3631      | -0.339333333 | -0.431233333 | 0.741627511 |
| -0.055333333 | 0.0318       | -0.431288889 | 0.741598952 |
| -0.2645      | -0.162366667 | -0.4316      | 0.741439047 |
| -0.2856      | -0.184633333 | -0.431644444 | 0.741416206 |
| -0.0083      | -0.090033333 | -0.431844444 | 0.741313431 |
| -0.097566667 | -0.176033333 | -0.432011111 | 0.741227796 |
| -0.0131      | 0.001866667  | -0.432411111 | 0.741022313 |
| -0.417       | -0.414833333 | -0.432566667 | 0.740942418 |
| -0.939933333 | -0.675033333 | -0.432688889 | 0.740879649 |
| 0.0311       | -0.307233333 | -0.432788889 | 0.740828297 |
| -0.532033333 | -0.3813      | -0.432855556 | 0.740794065 |
| -0.004233333 | -0.070433333 | -0.433377778 | 0.740525963 |
| -0.170566667 | -0.2408      | -0.433388889 | 0.74052026  |

|              |              |              |             |
|--------------|--------------|--------------|-------------|
| -0.192633333 | -0.254933333 | -0.433411111 | 0.740508853 |
| -0.092433333 | -0.097866667 | -0.433488889 | 0.740468932 |
| -0.443866667 | -0.3835      | -0.433522222 | 0.740451824 |
| -0.059933333 | -0.1029      | -0.433622222 | 0.740400502 |
| -0.2719      | -0.2246      | -0.433677778 | 0.740371991 |
| -0.2226      | -0.143166667 | -0.433855556 | 0.740280763 |
| -0.2138      | -0.212933333 | -0.434788889 | 0.739802003 |
| -0.021066667 | 0.085466667  | -0.435133333 | 0.739625396 |
| 0.109366667  | 0.037533333  | -0.435333333 | 0.739522869 |
| -0.330033333 | -0.356866667 | -0.435733333 | 0.739317858 |
| -0.266666667 | -0.217633333 | -0.435988889 | 0.739186909 |
| -0.394566667 | -0.2137      | -0.436044444 | 0.739158444 |
| -0.055966667 | -0.101066667 | -0.436366667 | 0.738993374 |
| -0.447       | -0.3342      | -0.436644444 | 0.738851101 |
| 0.176933333  | -0.143666667 | -0.436888889 | 0.738725924 |
| -0.3413      | -0.266133333 | -0.436911111 | 0.738714545 |
| -0.038733333 | -0.092233333 | -0.437088889 | 0.738623522 |
| -0.171666667 | -0.1427      | -0.437422222 | 0.738452883 |
| -0.210033333 | -0.269633333 | -0.437522222 | 0.738401699 |
| -0.255766667 | -0.185266667 | -0.437633333 | 0.738344832 |
| -0.314       | -0.3294      | -0.437822222 | 0.738248169 |
| -0.451766667 | -0.444233333 | -0.437866667 | 0.738225426 |
| -0.190066667 | -0.130833333 | -0.4384      | 0.737952571 |
| -0.148933333 | -0.1388      | -0.438488889 | 0.737907104 |
| -0.131966667 | -0.061566667 | -0.438555556 | 0.737873007 |
| -0.149033333 | -0.0699      | -0.438677778 | 0.737810498 |
| -0.3341      | -0.488566667 | -0.439066667 | 0.737611643 |
| -0.201966667 | -0.288933333 | -0.4391      | 0.737594601 |
| -0.3764      | -0.350166667 | -0.439366667 | 0.737458277 |
| -0.233666667 | -0.266233333 | -0.439377778 | 0.737452597 |
| -0.249933333 | -0.298       | -0.4396      | 0.737339014 |
| -0.199433333 | -0.2116      | -0.440211111 | 0.737026751 |
| -0.100966667 | -0.018733333 | -0.440244444 | 0.737009722 |
| -0.198266667 | -0.2633      | -0.440344444 | 0.736958638 |
| -0.017566667 | -0.036533333 | -0.440366667 | 0.736947287 |
| -0.387633333 | -0.357833333 | -0.440422222 | 0.736918909 |
| -0.401733333 | -0.392533333 | -0.440511111 | 0.736873506 |
| -0.516333333 | -0.5837      | -0.440555556 | 0.736850806 |
| -0.360666667 | -0.441366667 | -0.440666667 | 0.736794059 |
| 0.034866667  | -0.057066667 | -0.440733333 | 0.736760012 |
| 0.065833333  | -0.062033333 | -0.4409      | 0.736674904 |
| -0.237666667 | -0.416       | -0.441011111 | 0.73661817  |
| -0.302966667 | -0.450733333 | -0.441122222 | 0.73656144  |
| -0.314833333 | -0.4134      | -0.441411111 | 0.736413964 |
| -0.211233333 | -0.352766667 | -0.442755556 | 0.735728021 |
| -0.229466667 | 0.0715       | -0.442922222 | 0.735643031 |
| -0.4165      | -0.3983      | -0.442955556 | 0.735626035 |

|              |              |              |             |
|--------------|--------------|--------------|-------------|
| -0.207133333 | -0.1972      | -0.443088889 | 0.735558052 |
| -0.290066667 | -0.3502      | -0.443233333 | 0.73548441  |
| -0.263566667 | -0.3792      | -0.4433      | 0.735450424 |
| -0.327333333 | -0.294766667 | -0.443311111 | 0.73544476  |
| 0.0028       | -0.078866667 | -0.443322222 | 0.735439096 |
| -0.286133333 | -0.210333333 | -0.443611111 | 0.735291845 |
| -0.217966667 | -0.0803      | -0.443888889 | 0.735150285 |
| -0.012666667 | -0.1273      | -0.4444      | 0.734889885 |
| -0.212066667 | -0.2123      | -0.444544444 | 0.734816311 |
| -0.019333333 | -0.046366667 | -0.444777778 | 0.734697475 |
| -0.1004      | -0.047166667 | -0.445144444 | 0.734510773 |
| -0.068933333 | -0.251566667 | -0.445755556 | 0.734199707 |
| -0.429433333 | -0.2273      | -0.446188889 | 0.733979213 |
| 0.055        | 0.019866667  | -0.4462      | 0.733973561 |
| -0.0653      | -0.235       | -0.446266667 | 0.733939645 |
| -0.430933333 | -0.369566667 | -0.446333333 | 0.73390573  |
| 0.145633333  | 0.052366667  | -0.446433333 | 0.733854861 |
| -0.4368      | -0.528266667 | -0.446444444 | 0.73384921  |
| 0.0162       | -0.118466667 | -0.446522222 | 0.733809648 |
| -0.111166667 | -0.1459      | -0.446777778 | 0.733679674 |
| 0.0462       | -0.050633333 | -0.4468      | 0.733668373 |
| -0.185733333 | -0.130466667 | -0.447011111 | 0.733561022 |
| -0.008366667 | -0.046       | -0.447422222 | 0.733352016 |
| -0.3905      | -0.2507      | -0.447622222 | 0.733250359 |
| -0.202633333 | -0.2986      | -0.447622222 | 0.733250359 |
| -0.155233333 | -0.555933333 | -0.448333333 | 0.732889026 |
| -0.345766667 | -0.357366667 | -0.448622222 | 0.732742285 |
| -0.0869      | 0.0802       | -0.448711111 | 0.73269714  |
| 0.1075       | 0.052933333  | -0.448822222 | 0.732640712 |
| -0.582666667 | -0.476566667 | -0.449033333 | 0.732533512 |
| -0.284066667 | -0.470833333 | -0.449111111 | 0.732494021 |
| -0.126633333 | -0.1971      | -0.449566667 | 0.73226276  |
| -0.010233333 | -0.1254      | -0.449766667 | 0.732161254 |
| -0.077       | -0.193433333 | -0.449811111 | 0.732138699 |
| -0.118766667 | -0.040166667 | -0.450455556 | 0.731811729 |
| 0.0848       | -0.052933333 | -0.450522222 | 0.731777913 |
| -0.330166667 | -0.287666667 | -0.450544444 | 0.731766642 |
| -0.295633333 | -0.1361      | -0.451677778 | 0.731192016 |
| -0.201133333 | -0.321966667 | -0.451933333 | 0.731062506 |
| -0.1339      | -0.1762      | -0.451955556 | 0.731051245 |
| -0.2397      | -0.273666667 | -0.452166667 | 0.730944277 |
| -0.164533333 | -0.115133333 | -0.452188889 | 0.730933018 |
| 0.054066667  | -0.010966667 | -0.452444444 | 0.730803554 |
| -0.223766667 | -0.226433333 | -0.452622222 | 0.730713506 |
| -0.290466667 | -0.327833333 | -0.452722222 | 0.730662858 |
| -0.362633333 | -0.299533333 | -0.452788889 | 0.730629095 |
| -0.297433333 | -0.222433333 | -0.453033333 | 0.730505311 |

|              |              |              |             |
|--------------|--------------|--------------|-------------|
| -0.1595      | -0.232       | -0.453066667 | 0.730488433 |
| -0.2066      | -0.358266667 | -0.453111111 | 0.730465929 |
| -0.303866667 | -0.267333333 | -0.453144444 | 0.730449052 |
| -0.2494      | -0.361433333 | -0.453411111 | 0.730314049 |
| -0.411333333 | -0.541166667 | -0.4535      | 0.730269053 |
| -0.3134      | -0.273733333 | -0.453555556 | 0.730240933 |
| 0.056466667  | -0.1322      | -0.453922222 | 0.730055363 |
| -0.104133333 | -0.108633333 | -0.454355556 | 0.729836113 |
| -0.3281      | -0.2909      | -0.454377778 | 0.729824872 |
| -0.198066667 | -0.080733333 | -0.454377778 | 0.729824872 |
| -0.443866667 | -0.421266667 | -0.454855556 | 0.729583215 |
| -0.283633333 | -0.270666667 | -0.454944444 | 0.729538265 |
| -0.243433333 | -0.296933333 | -0.455233333 | 0.729392195 |
| -0.1705      | -0.207033333 | -0.455822222 | 0.729094527 |
| -0.308233333 | -0.247633333 | -0.455911111 | 0.729049607 |
| -0.061266667 | -0.140233333 | -0.4561      | 0.72895416  |
| -0.382533333 | -0.0902      | -0.4563      | 0.728853113 |
| -0.316466667 | -0.253733333 | -0.4565      | 0.728752079 |
| -0.346266667 | -0.1744      | -0.4568      | 0.728600555 |
| -0.324633333 | -0.3081      | -0.456855556 | 0.728572499 |
| -0.054566667 | -0.279233333 | -0.457244444 | 0.728376133 |
| -0.267866667 | -0.346933333 | -0.457555556 | 0.728219079 |
| -0.047066667 | 0.055533333  | -0.4577      | 0.728146172 |
| -0.381866667 | -0.350066667 | -0.457833333 | 0.728078881 |
| -0.095066667 | -0.155533333 | -0.457866667 | 0.728062059 |
| -0.2208      | -0.301366667 | -0.458833333 | 0.72757439  |
| -0.1128      | -0.0734      | -0.459455556 | 0.727260661 |
| -0.125133333 | -0.078133333 | -0.459533333 | 0.727221454 |
| -0.229666667 | -0.1629      | -0.459855556 | 0.727059049 |
| -0.444233333 | -0.326       | -0.460255556 | 0.726857493 |
| -0.057633333 | -0.048966667 | -0.461044444 | 0.726460145 |
| 0.060233333  | -0.0413      | -0.461344444 | 0.726309097 |
| -0.022966667 | -0.138266667 | -0.461422222 | 0.726269942 |
| -0.1075      | -0.163533333 | -0.461444444 | 0.726258755 |
| -0.431233333 | -0.451       | -0.461455556 | 0.726253162 |
| -0.2805      | -0.300866667 | -0.461555556 | 0.726202823 |
| -0.4185      | -0.265       | -0.461766667 | 0.726096565 |
| -0.2381      | -0.2923      | -0.461833333 | 0.726063013 |
| -0.439       | -0.462466667 | -0.461888889 | 0.726035054 |
| -0.337233333 | -0.2913      | -0.461988889 | 0.725984731 |
| -0.2361      | -0.397666667 | -0.462466667 | 0.725744346 |
| -0.0387      | -0.053266667 | -0.4625      | 0.725727578 |
| -0.252433333 | -0.3353      | -0.462666667 | 0.725643744 |
| -0.065033333 | -0.146533333 | -0.462677778 | 0.725638155 |
| -0.2467      | -0.3161      | -0.462733333 | 0.725610213 |
| -0.3193      | -0.451333333 | -0.463066667 | 0.725442581 |
| -0.052466667 | -0.024433333 | -0.463077778 | 0.725436994 |



|              |              |              |             |
|--------------|--------------|--------------|-------------|
| -0.207066667 | -0.073133333 | -0.463355556 | 0.725297331 |
| -0.074266667 | -0.2896      | -0.463377778 | 0.725286159 |
| -0.375233333 | -0.3288      | -0.463433333 | 0.72525823  |
| -0.1824      | -0.173966667 | -0.4643      | 0.724822678 |
| -0.262066667 | -0.278766667 | -0.464477778 | 0.724733367 |
| 0.025133333  | -0.029933333 | -0.464744444 | 0.72459942  |
| -0.274166667 | -0.3575      | -0.464788889 | 0.724577098 |
| -0.061066667 | -0.029066667 | -0.465322222 | 0.724309287 |
| -0.2529      | -0.237233333 | -0.465477778 | 0.724231194 |
| -0.223166667 | -0.142933333 | -0.465488889 | 0.724225616 |
| -0.156766667 | -0.058833333 | -0.465511111 | 0.724214461 |
| -0.337133333 | -0.3154      | -0.465833333 | 0.724052727 |
| -0.090033333 | -0.071666667 | -0.466011111 | 0.72396351  |
| 0.031733333  | -0.297366667 | -0.466477778 | 0.723729369 |
| -0.176466667 | -0.045433333 | -0.466688889 | 0.723623472 |
| -0.122133333 | -0.138466667 | -0.466788889 | 0.723573316 |
| -0.122566667 | -0.115566667 | -0.466866667 | 0.723534309 |
| -0.248266667 | -0.2216      | -0.466944444 | 0.723495303 |
| 0.1317       | 0.026333333  | -0.467011111 | 0.723461871 |
| -0.097066667 | -0.104233333 | -0.467366667 | 0.723283594 |
| -0.097033333 | -0.280866667 | -0.467566667 | 0.723183333 |
| -0.483766667 | -0.456366667 | -0.467622222 | 0.723155485 |
| -0.223533333 | -0.1347      | -0.467822222 | 0.723055241 |
| -0.083033333 | -0.244733333 | -0.468544444 | 0.722693366 |
| -0.265833333 | -0.137733333 | -0.468755556 | 0.722587621 |
| -0.474333333 | -0.3815      | -0.468833333 | 0.722548666 |
| -0.471       | -0.565566667 | -0.468866667 | 0.722531972 |
| -0.268133333 | -0.2638      | -0.469088889 | 0.722420687 |
| -0.150966667 | -0.098133333 | -0.4691      | 0.722415123 |
| -0.171733333 | -0.296066667 | -0.469222222 | 0.722353924 |
| -0.173266667 | -0.2943      | -0.469655556 | 0.722136988 |
| -0.1338      | -0.176366667 | -0.469677778 | 0.722125865 |
| -0.0628      | 0.222666667  | -0.469933333 | 0.72199796  |
| -0.028333333 | -0.209766667 | -0.470266667 | 0.721831163 |
| 0.121333333  | -0.077366667 | -0.470777778 | 0.721575481 |
| -0.242666667 | -0.243833333 | -0.470977778 | 0.721475456 |
| -0.050666667 | 0.005166667  | -0.471011111 | 0.721458787 |
| -0.169966667 | -0.270033333 | -0.471055556 | 0.721436562 |
| -0.3082      | -0.0959      | -0.471422222 | 0.721253229 |
| -0.495066667 | -0.407433333 | -0.472055556 | 0.720936673 |
| -0.2982      | -0.237566667 | -0.472222222 | 0.720853392 |
| -0.237566667 | -0.114166667 | -0.472422222 | 0.720753468 |
| -0.086633333 | -0.0041      | -0.472755556 | 0.720586957 |
| -0.059166667 | 0.013466667  | -0.472855556 | 0.720537012 |
| -0.545866667 | -0.360433333 | -0.4729      | 0.720514815 |
| -0.336133333 | -0.463333333 | -0.473155556 | 0.720387196 |
| -0.189366667 | -0.212833333 | -0.473511111 | 0.720209677 |

|              |              |              |             |
|--------------|--------------|--------------|-------------|
| -0.060933333 | -0.114266667 | -0.473688889 | 0.720120934 |
| -0.155833333 | -0.2147      | -0.4738      | 0.720065475 |
| -0.212366667 | -0.255766667 | -0.474388889 | 0.719771613 |
| -0.2636      | -0.2211      | -0.474488889 | 0.719721724 |
| -0.3015      | -0.427833333 | -0.474555556 | 0.719688467 |
| -0.266       | -0.254266667 | -0.474722222 | 0.71960533  |
| -0.6156      | -0.325166667 | -0.474922222 | 0.719505579 |
| -0.271433333 | -0.0752      | -0.4755      | 0.719217485 |
| -0.287833333 | -0.287266667 | -0.475822222 | 0.719056868 |
| -0.193466667 | -0.147666667 | -0.475877778 | 0.719029179 |
| -0.324766667 | -0.422266667 | -0.476044444 | 0.718946118 |
| -0.0651      | -0.046533333 | -0.476211111 | 0.718863067 |
| -0.164966667 | -0.217333333 | -0.476388889 | 0.718774489 |
| -0.2301      | -0.246033333 | -0.476388889 | 0.718774489 |
| -0.280066667 | -0.333233333 | -0.476444444 | 0.718746811 |
| -0.077066667 | 0.0439       | -0.476611111 | 0.718663783 |
| -0.019566667 | -0.4379      | -0.476744444 | 0.718597368 |
| -0.044066667 | -0.0947      | -0.476844444 | 0.71854756  |
| -0.421566667 | -0.410733333 | -0.476966667 | 0.718486689 |
| -0.054033333 | -0.022533333 | -0.4775      | 0.718221129 |
| -0.117266667 | -0.1824      | -0.477888889 | 0.718027553 |
| -0.3847      | -0.264566667 | -0.477977778 | 0.717983315 |
| -0.406066667 | -0.287966667 | -0.478255556 | 0.717845087 |
| -0.126433333 | -0.200866667 | -0.478366667 | 0.717789803 |
| 0.001        | -0.036533333 | -0.478644444 | 0.717651612 |
| -0.158833333 | -0.0645      | -0.4791      | 0.717425037 |
| -0.336633333 | -0.299233333 | -0.479777778 | 0.717088071 |
| -0.228466667 | -0.498433333 | -0.479877778 | 0.717038367 |
| -0.1766      | -0.367066667 | -0.479955556 | 0.716999712 |
| -0.332866667 | -0.302566667 | -0.480644444 | 0.716657425 |
| -0.3716      | -0.2643      | -0.481088889 | 0.716436682 |
| -0.1097      | -0.232733333 | -0.481222222 | 0.716370472 |
| -0.176333333 | -0.2745      | -0.4814      | 0.716282202 |
| -0.345433333 | -0.112533333 | -0.481644444 | 0.716160848 |
| -0.3975      | -0.498266667 | -0.482011111 | 0.715978856 |
| -0.067733333 | -0.1046      | -0.482111111 | 0.71592923  |
| -0.0879      | -0.241966667 | -0.482177778 | 0.715896148 |
| -0.195766667 | -0.1715      | -0.482211111 | 0.715879608 |
| -0.123133333 | -0.370733333 | -0.482811111 | 0.715581943 |
| -0.246033333 | -0.173466667 | -0.483155556 | 0.715411118 |
| -0.2544      | -0.223166667 | -0.483255556 | 0.715361531 |
| 0.3214       | 0.1264       | -0.484144444 | 0.714920911 |
| -0.020566667 | -0.0229      | -0.484166667 | 0.714909899 |
| -0.323466667 | -0.258066667 | -0.4846      | 0.714695198 |
| -0.1947      | -0.225133333 | -0.484655556 | 0.714667677 |
| -0.075433333 | 0.0381       | -0.484677778 | 0.714656669 |
| -0.2649      | -0.267       | -0.484711111 | 0.714640157 |

|              |              |              |             |
|--------------|--------------|--------------|-------------|
| -0.2777      | -0.2156      | -0.484877778 | 0.714557603 |
| -0.2715      | -0.262433333 | -0.485033333 | 0.714480562 |
| -0.0887      | -0.137766667 | -0.485611111 | 0.71419448  |
| -0.447166667 | -0.338333333 | -0.485622222 | 0.71418898  |
| -0.0441      | 0.077333333  | -0.4858      | 0.714100978 |
| -0.355566667 | -0.6431      | -0.486222222 | 0.713892019 |
| -0.5712      | -0.4623      | -0.486844444 | 0.713584189 |
| -0.068       | -0.075466667 | -0.487055556 | 0.713479778 |
| -0.307233333 | -0.288966667 | -0.487522222 | 0.713249026 |
| -0.3775      | -0.463133333 | -0.487533333 | 0.713243533 |
| -0.2063      | -0.194966667 | -0.488022222 | 0.713001876 |
| -0.1028      | -0.094266667 | -0.488588889 | 0.712721876 |
| -0.072033333 | -0.164366667 | -0.4886      | 0.712716387 |
| 0.082733333  | -0.059366667 | -0.489055556 | 0.71249137  |
| -0.377833333 | -0.3044      | -0.489333333 | 0.712354199 |
| -0.055933333 | -0.020666667 | -0.489422222 | 0.71231031  |
| -0.088466667 | -0.166566667 | -0.489622222 | 0.71221157  |
| -0.1522      | -0.069033333 | -0.489666667 | 0.71218963  |
| -0.059966667 | -0.135833333 | -0.489733333 | 0.71215672  |
| -0.0646      | -0.0042      | -0.489777778 | 0.712134781 |
| -0.421633333 | -0.3182      | -0.4898      | 0.712123812 |
| -0.435033333 | -0.206433333 | -0.489966667 | 0.712041549 |
| -0.2281      | -0.2615      | -0.489977778 | 0.712036065 |
| -0.445233333 | -0.138       | -0.490055556 | 0.71199768  |
| -0.3111      | -0.4345      | -0.490333333 | 0.711860604 |
| -0.2078      | -0.263033333 | -0.490788889 | 0.711635857 |
| -0.214166667 | -0.215133333 | -0.491077778 | 0.711493372 |
| -0.1541      | -0.203266667 | -0.491177778 | 0.711444057 |
| 0.054466667  | 0.0237       | -0.491566667 | 0.711252308 |
| -0.084466667 | 0.1036       | -0.491611111 | 0.711230397 |
| -0.279       | -0.2592      | -0.491755556 | 0.711159191 |
| -0.265533333 | -0.2914      | -0.492077778 | 0.711000373 |
| -0.1151      | -0.216333333 | -0.4922      | 0.710940141 |
| -0.0895      | -0.151       | -0.4922      | 0.710940141 |
| -0.260766667 | -0.218       | -0.492222222 | 0.710929191 |
| -0.042966667 | 0.031466667  | -0.492477778 | 0.710803269 |
| -0.2682      | -0.203433333 | -0.492677778 | 0.710704738 |
| -0.083766667 | -0.248566667 | -0.492755556 | 0.710666424 |
| -0.320366667 | -0.373266667 | -0.492911111 | 0.710589802 |
| -0.432933333 | -0.403166667 | -0.492922222 | 0.710584329 |
| 0.071866667  | -0.1641      | -0.493611111 | 0.710245105 |
| -0.470233333 | -0.422266667 | -0.494211111 | 0.709949784 |
| 0.0908       | -0.162133333 | -0.494388889 | 0.709862305 |
| -0.039233333 | -0.085733333 | -0.494677778 | 0.709720175 |
| 0.148566667  | -0.101966667 | -0.494677778 | 0.709720175 |
| -0.4677      | -0.195833333 | -0.495033333 | 0.709545284 |
| -0.199       | -0.017233333 | -0.495122222 | 0.709501568 |

|              |              |              |             |
|--------------|--------------|--------------|-------------|
| -0.2325      | -0.2671      | -0.495311111 | 0.709408681 |
| -0.091766667 | -0.012633333 | -0.495366667 | 0.709381363 |
| -0.020466667 | -0.191766667 | -0.495744444 | 0.709195632 |
| -0.1223      | -0.2457      | -0.495866667 | 0.709135553 |
| -0.233266667 | -0.212       | -0.495922222 | 0.709108246 |
| -0.217833333 | -0.204333333 | -0.496177778 | 0.708982647 |
| -0.0205      | 0.1232       | -0.497077778 | 0.708540499 |
| -0.099066667 | -0.2486      | -0.497122222 | 0.708518671 |
| -0.065666667 | 0.0095       | -0.497311111 | 0.708425913 |
| -0.5109      | -0.397566667 | -0.497577778 | 0.70829498  |
| -0.287033333 | -0.103966667 | -0.4976      | 0.70828407  |
| -0.170133333 | -0.084566667 | -0.497711111 | 0.708229523 |
| -0.340166667 | -0.320166667 | -0.497833333 | 0.708169525 |
| -0.041866667 | -0.0686      | -0.498022222 | 0.708076812 |
| -0.3352      | -0.464033333 | -0.498077778 | 0.708049546 |
| -0.181666667 | -0.2452      | -0.498522222 | 0.707831454 |
| -0.154866667 | -0.017233333 | -0.498633333 | 0.707776942 |
| 0.031466667  | 0.170533333  | -0.498633333 | 0.707776942 |
| -0.0322      | 0.0309       | -0.499055556 | 0.707569832 |
| -0.0674      | -0.0814      | -0.499155556 | 0.707520789 |
| -0.139733333 | -0.268133333 | -0.499688889 | 0.707259282 |
| -0.082766667 | -0.1003      | -0.499877778 | 0.707166688 |
| 0.038433333  | -0.059866667 | -0.499977778 | 0.707117673 |
| -0.3964      | -0.177033333 | -0.5008      | 0.706714787 |
| 0.021        | -0.155866667 | -0.500922222 | 0.706654918 |
| -0.455066667 | -0.410366667 | -0.501066667 | 0.70658417  |
| -0.3867      | -0.301433333 | -0.501744444 | 0.706252295 |
| 0.1352       | 0.0656       | -0.5027      | 0.70578467  |
| -0.2706      | -0.324633333 | -0.503055556 | 0.705610749 |
| -0.018933333 | 0.203933333  | -0.503222222 | 0.705529239 |
| -0.053333333 | -0.2029      | -0.503233333 | 0.705523805 |
| -0.105366667 | -0.056433333 | -0.504244444 | 0.705029513 |
| -0.1003      | -0.165266667 | -0.504444444 | 0.704931782 |
| -0.127933333 | -0.216266667 | -0.504777778 | 0.704768927 |
| -0.1981      | -0.159966667 | -0.504911111 | 0.704703795 |
| -0.516666667 | -0.345266667 | -0.5052      | 0.704562698 |
| -0.320333333 | -0.3369      | -0.5058      | 0.704269739 |
| -0.245766667 | -0.289366667 | -0.505822222 | 0.704258891 |
| -0.2147      | -0.1521      | -0.505866667 | 0.704237196 |
| -0.207533333 | -0.095633333 | -0.506211111 | 0.704069079 |
| 0.049533333  | -0.048733333 | -0.506488889 | 0.70393353  |
| -0.349466667 | -0.184033333 | -0.5075      | 0.703440352 |
| -0.178666667 | -0.286       | -0.507566667 | 0.703407846 |
| -0.235       | -0.026233333 | -0.507788889 | 0.703299507 |
| -0.254866667 | -0.267933333 | -0.507877778 | 0.703256176 |
| -0.1347      | -0.067933333 | -0.508211111 | 0.703093708 |
| -0.250366667 | -0.316333333 | -0.508311111 | 0.703044975 |

|              |              |              |             |
|--------------|--------------|--------------|-------------|
| -0.163333333 | -0.124833333 | -0.508988889 | 0.702714762 |
| -0.426       | -0.4957      | -0.509044444 | 0.702687702 |
| -0.3423      | -0.328066667 | -0.5095      | 0.702465852 |
| -0.290966667 | -0.2744      | -0.509866667 | 0.70228734  |
| -0.158033333 | -0.267566667 | -0.509888889 | 0.702276523 |
| 0.026333333  | -0.0642      | -0.510222222 | 0.702114281 |
| -0.1266      | -0.312866667 | -0.510422222 | 0.702016954 |
| -0.340466667 | -0.501333333 | -0.510522222 | 0.701968296 |
| -0.045033333 | -0.149466667 | -0.510544444 | 0.701957483 |
| 0.1195       | 0.0683       | -0.510544444 | 0.701957483 |
| -0.698633333 | -0.6959      | -0.510733333 | 0.701865583 |
| 0.029166667  | -0.180033333 | -0.511122222 | 0.701676416 |
| -0.493666667 | -0.476666667 | -0.511577778 | 0.701454885 |
| -0.2305      | -0.313766667 | -0.511611111 | 0.701438678 |
| -0.330233333 | -0.371066667 | -0.511633333 | 0.701427873 |
| -0.4445      | -0.2728      | -0.511722222 | 0.701384658 |
| -0.4413      | -0.431166667 | -0.511922222 | 0.701287432 |
| -0.0069      | 0.134566667  | -0.511944444 | 0.70127663  |
| -0.1101      | -0.1164      | -0.512066667 | 0.701217221 |
| -0.2833      | -0.455933333 | -0.512244444 | 0.701130818 |
| 0.043866667  | -0.028933333 | -0.512377778 | 0.701066023 |
| -0.231966667 | -0.157966667 | -0.512455556 | 0.701028229 |
| -0.280733333 | -0.282366667 | -0.512833333 | 0.700844685 |
| -0.188166667 | -0.090433333 | -0.512877778 | 0.700823094 |
| -0.348766667 | -0.445933333 | -0.512944444 | 0.70079071  |
| -0.4898      | -0.3519      | -0.513133333 | 0.700698963 |
| -0.591166667 | -0.385133333 | -0.513233333 | 0.700650396 |
| -0.483133333 | -0.5525      | -0.513888889 | 0.700332095 |
| -0.2634      | -0.281433333 | -0.5146      | 0.699986983 |
| -0.210966667 | -0.446033333 | -0.515211111 | 0.699690539 |
| -0.2219      | -0.264933333 | -0.515466667 | 0.699566608 |
| 0.113666667  | -0.051966667 | -0.516233333 | 0.699194948 |
| -0.305866667 | -0.193433333 | -0.516333333 | 0.699146486 |
| -0.342733333 | -0.274266667 | -0.516911111 | 0.698866544 |
| -0.3848      | -0.2415      | -0.516944444 | 0.698850397 |
| -0.240866667 | -0.294433333 | -0.517311111 | 0.698672804 |
| -0.054833333 | 0.083933333  | -0.517944444 | 0.698366159 |
| -0.427266667 | -0.485266667 | -0.518188889 | 0.69824784  |
| -0.479433333 | -0.326266667 | -0.518255556 | 0.698215575 |
| -0.1403      | -0.012033333 | -0.518433333 | 0.698129542 |
| -0.328633333 | -0.646       | -0.518666667 | 0.69801664  |
| -0.366233333 | -0.3085      | -0.519177778 | 0.697769393 |
| -0.390266667 | -0.546033333 | -0.5194      | 0.697661922 |
| -0.3707      | -0.411966667 | -0.519455556 | 0.697635057 |
| -0.4084      | -0.256166667 | -0.519933333 | 0.697404059 |
| -0.098933333 | 0.195166667  | -0.520333333 | 0.697210725 |
| -0.216       | -0.0903      | -0.520377778 | 0.697189246 |

|              |              |              |             |
|--------------|--------------|--------------|-------------|
| -0.0521      | -0.129166667 | -0.520555556 | 0.69710334  |
| -0.1791      | -0.098233333 | -0.520555556 | 0.69710334  |
| -0.388833333 | -0.3839      | -0.520577778 | 0.697092602 |
| -0.4825      | -0.170633333 | -0.520633333 | 0.697065759 |
| 0.076533333  | 0.135333333  | -0.520922222 | 0.696926191 |
| -0.146866667 | -0.1628      | -0.521       | 0.696888619 |
| -0.224133333 | -0.3037      | -0.521111111 | 0.69683495  |
| -0.0846      | -0.1092      | -0.521122222 | 0.696829583 |
| -0.201466667 | -0.15        | -0.521211111 | 0.69678665  |
| -0.360933333 | -0.501066667 | -0.521344444 | 0.696722257 |
| -0.082766667 | -0.173533333 | -0.521344444 | 0.696722257 |
| -0.316       | -0.341933333 | -0.521377778 | 0.696706159 |
| -0.0516      | 0.012233333  | -0.522077778 | 0.696368197 |
| -0.107166667 | -0.0053      | -0.522177778 | 0.69631993  |
| -0.0203      | 0.027433333  | -0.522233333 | 0.696293117 |
| -0.171966667 | -0.3086      | -0.522544444 | 0.69614298  |
| 0.009833333  | -0.090366667 | -0.522622222 | 0.696105451 |
| -0.088733333 | -0.028333333 | -0.522733333 | 0.696051842 |
| -0.386433333 | -0.477266667 | -0.523166667 | 0.695842804 |
| 0.1534       | 0.456933333  | -0.523388889 | 0.69573563  |
| -0.0315      | 0.197966667  | -0.524055556 | 0.695414206 |
| -0.348133333 | -0.308866667 | -0.524477778 | 0.695210715 |
| -0.0413      | 0.015333333  | -0.5245      | 0.695200006 |
| -0.404566667 | -0.221166667 | -0.524788889 | 0.695060811 |
| -0.219133333 | -0.4276      | -0.524822222 | 0.695044752 |
| -0.048633333 | -0.017766667 | -0.525088889 | 0.694916293 |
| -0.0146      | -0.038466667 | -0.5252      | 0.694862775 |
| -0.234766667 | -0.354666667 | -0.525377778 | 0.694777155 |
| -0.3237      | -0.151633333 | -0.525488889 | 0.694723648 |
| 0.122833333  | -0.100933333 | -0.5257      | 0.694621995 |
| -0.205566667 | -0.1805      | -0.526211111 | 0.694375952 |
| -0.388466667 | -0.351133333 | -0.526377778 | 0.694295739 |
| -0.372233333 | -0.210033333 | -0.527       | 0.69399636  |
| -0.180033333 | -0.0979      | -0.527344444 | 0.693830687 |
| -0.2309      | -0.373133333 | -0.527444444 | 0.693782596 |
| -0.221933333 | -0.152166667 | -0.527644444 | 0.693686424 |
| 0.0778       | -0.013       | -0.528188889 | 0.69342469  |
| -0.350533333 | -0.2684      | -0.528355556 | 0.693344587 |
| -0.171266667 | -0.152433333 | -0.528366667 | 0.693339247 |
| -0.153933333 | -0.1249      | -0.5295      | 0.692794797 |
| -0.2853      | -0.305666667 | -0.529688889 | 0.692704097 |
| -0.180133333 | -0.2829      | -0.529744444 | 0.692677422 |
| -0.515466667 | -0.455866667 | -0.529977778 | 0.692565402 |
| -0.130366667 | -0.136733333 | -0.530866667 | 0.692138822 |
| -0.037466667 | -0.0218      | -0.531566667 | 0.691803076 |
| -0.264333333 | -0.2854      | -0.532088889 | 0.691552704 |
| -0.0656      | 0.002766667  | -0.532166667 | 0.691515423 |

|              |              |              |             |
|--------------|--------------|--------------|-------------|
| -0.370666667 | -0.4906      | -0.532577778 | 0.691318396 |
| -0.2696      | -0.283166667 | -0.532711111 | 0.691254508 |
| -0.189       | -0.256133333 | -0.532888889 | 0.691169333 |
| -0.235633333 | -0.380133333 | -0.533366667 | 0.690940476 |
| -0.438333333 | -0.250933333 | -0.5336      | 0.690828736 |
| -0.4293      | -0.414466667 | -0.533844444 | 0.690711695 |
| -0.3568      | -0.3618      | -0.534411111 | 0.690440448 |
| -0.263666667 | -0.2546      | -0.534611111 | 0.690344739 |
| -0.373366667 | -0.284233333 | -0.534955556 | 0.690179938 |
| -0.511466667 | -0.4415      | -0.535633333 | 0.689855768 |
| -0.495466667 | -0.426433333 | -0.536788889 | 0.689303436 |
| -0.269333333 | -0.3002      | -0.536966667 | 0.689218501 |
| -0.100066667 | -0.2568      | -0.537066667 | 0.689170729 |
| -0.079133333 | -0.109866667 | -0.537444444 | 0.68899029  |
| -0.312533333 | -0.1625      | -0.537577778 | 0.688926616 |
| 0.040733333  | 0.019333333  | -0.538844444 | 0.688322014 |
| -0.056233333 | -0.1461      | -0.538933333 | 0.688279605 |
| -0.549066667 | -0.2463      | -0.539533333 | 0.687993417 |
| -0.367233333 | -0.4157      | -0.5396      | 0.687961626 |
| -0.443266667 | -0.344       | -0.540288889 | 0.687633202 |
| -0.2565      | -0.347366667 | -0.540511111 | 0.687527292 |
| -0.351233333 | -0.2956      | -0.540844444 | 0.687368458 |
| -0.319533333 | -0.182466667 | -0.541066667 | 0.687262589 |
| -0.2337      | -0.290533333 | -0.541777778 | 0.686923917 |
| -0.407266667 | -0.437433333 | -0.542266667 | 0.686691178 |
| 0.011        | 0.017333333  | -0.542455556 | 0.686601276 |
| -0.1988      | -0.1499      | -0.542455556 | 0.686601276 |
| -0.1451      | -0.134666667 | -0.542555556 | 0.686553686 |
| -0.4013      | -0.573       | -0.542711111 | 0.686479664 |
| -0.149166667 | -0.166433333 | -0.542777778 | 0.686447943 |
| -0.233133333 | -0.298966667 | -0.542866667 | 0.68640565  |
| -0.2157      | -0.224933333 | -0.543466667 | 0.686120241 |
| -0.1411      | -0.3693      | -0.543611111 | 0.68605155  |
| -0.4564      | -0.5021      | -0.543988889 | 0.685871927 |
| -0.329133333 | -0.353266667 | -0.544       | 0.685866644 |
| -0.2469      | -0.116733333 | -0.544133333 | 0.68580326  |
| -0.3003      | -0.2028      | -0.544522222 | 0.685618421 |
| -0.3904      | -0.352866667 | -0.544566667 | 0.6855973   |
| -0.180166667 | -0.0978      | -0.5448      | 0.685486424 |
| -0.3456      | -0.503733333 | -0.545255556 | 0.685270005 |
| -0.604366667 | -0.476066667 | -0.545855556 | 0.684985068 |
| -0.150333333 | -0.2253      | -0.546244444 | 0.68480045  |
| -0.1589      | -0.228733333 | -0.546455556 | 0.68470025  |
| -0.2211      | -0.206533333 | -0.546533333 | 0.684663338 |
| -0.473833333 | -0.491033333 | -0.546966667 | 0.684457721 |
| -0.3322      | -0.287       | -0.547033333 | 0.684426093 |
| -0.437733333 | -0.399466667 | -0.547555556 | 0.684178391 |

|              |              |              |             |
|--------------|--------------|--------------|-------------|
| -0.3759      | -0.2648      | -0.547855556 | 0.684036135 |
| -0.0999      | 0.0014       | -0.547888889 | 0.684020331 |
| -0.1272      | -0.1653      | -0.548811111 | 0.68358322  |
| -0.2692      | -0.1802      | -0.548877778 | 0.683551633 |
| -0.275466667 | -0.355433333 | -0.549033333 | 0.683477934 |
| -0.304733333 | -0.2787      | -0.549155556 | 0.683420034 |
| -0.3704      | -0.258666667 | -0.549677778 | 0.683172696 |
| -0.4809      | -0.603133333 | -0.549688889 | 0.683167435 |
| -0.081566667 | -0.1706      | -0.550211111 | 0.682920189 |
| -0.2678      | -0.312666667 | -0.551066667 | 0.682515319 |
| -0.279133333 | -0.067433333 | -0.5511      | 0.68249955  |
| -0.392466667 | -0.5169      | -0.551388889 | 0.682362898 |
| -0.551333333 | -0.377666667 | -0.551422222 | 0.682347133 |
| -0.197566667 | -0.293966667 | -0.552988889 | 0.681606553 |
| -0.213233333 | -0.318166667 | -0.553022222 | 0.681590805 |
| -0.226433333 | -0.447       | -0.553288889 | 0.681464832 |
| -0.6598      | -0.5608      | -0.553322222 | 0.681449087 |
| -0.513533333 | -0.652366667 | -0.553888889 | 0.681181477 |
| -0.615766667 | -0.7597      | -0.5541      | 0.681081807 |
| -0.5363      | -0.3706      | -0.554788889 | 0.680756667 |
| 0.168233333  | 0.102866667  | -0.556144444 | 0.680117329 |
| -0.190333333 | -0.0751      | -0.557133333 | 0.679651305 |
| -0.063533333 | -0.2032      | -0.557155556 | 0.679640836 |
| -0.1573      | -0.146133333 | -0.558366667 | 0.679070532 |
| -0.0419      | -0.115033333 | -0.558611111 | 0.678955483 |
| -0.3913      | -0.319966667 | -0.558922222 | 0.678809085 |
| -0.903933333 | -1.0546      | -0.559122222 | 0.678714988 |
| -0.2684      | -0.3823      | -0.559255556 | 0.678652264 |
| -0.2016      | -0.277966667 | -0.559877778 | 0.678359631 |
| -0.3438      | -0.393033333 | -0.560433333 | 0.678098457 |
| -0.224333333 | -0.160866667 | -0.561144444 | 0.677764301 |
| 0.000766667  | 0.0921       | -0.5613      | 0.677691227 |
| 0.0131       | -0.038433333 | -0.561966667 | 0.677378139 |
| -0.231133333 | -0.217666667 | -0.562488889 | 0.677132988 |
| -0.2068      | -0.085966667 | -0.563033333 | 0.6768775   |
| -0.418933333 | -0.341866667 | -0.563533333 | 0.676642953 |
| -0.589533333 | -0.6074      | -0.563744444 | 0.676543946 |
| -0.216166667 | -0.139666667 | -0.563944444 | 0.676450164 |
| -0.458433333 | -0.331933333 | -0.564088889 | 0.67638244  |
| -0.392233333 | -0.624566667 | -0.564388889 | 0.676241805 |
| -0.187866667 | -0.091266667 | -0.564455556 | 0.676210557 |
| -0.4964      | -0.204266667 | -0.564788889 | 0.676054337 |
| -0.645466667 | -0.5454      | -0.565288889 | 0.675820075 |
| -0.471033333 | -0.422566667 | -0.565311111 | 0.675809665 |
| 0.025433333  | -0.081166667 | -0.565322222 | 0.67580446  |
| -0.045533333 | -0.094966667 | -0.565355556 | 0.675788846 |
| -0.413633333 | -0.408933333 | -0.565411111 | 0.675762823 |



|              |              |              |             |
|--------------|--------------|--------------|-------------|
| -0.421433333 | -0.4298      | -0.565544444 | 0.675700372 |
| 0.140166667  | -0.039866667 | -0.565566667 | 0.675689965 |
| -0.2115      | -0.292166667 | -0.566033333 | 0.675471435 |
| -0.421066667 | -0.222933333 | -0.566077778 | 0.675450627 |
| 0.0035       | -0.066766667 | -0.566944444 | 0.675044987 |
| -0.008166667 | 0.117933333  | -0.567155556 | 0.674946214 |
| -0.4796      | -0.484733333 | -0.567566667 | 0.674753908 |
| -0.074       | 0.0654       | -0.568388889 | 0.674369461 |
| -0.186033333 | -0.0967      | -0.568511111 | 0.674312333 |
| -0.133866667 | -0.260533333 | -0.570166667 | 0.673538974 |
| -0.051966667 | -0.259933333 | -0.5704      | 0.673430048 |
| -0.1691      | -0.2861      | -0.5706      | 0.673336697 |
| -0.306966667 | -0.3518      | -0.570955556 | 0.673170772 |
| -0.267233333 | -0.244466667 | -0.571044444 | 0.673129298 |
| -0.427333333 | -0.269666667 | -0.571611111 | 0.672864955 |
| -0.393666667 | -0.367       | -0.571877778 | 0.672740595 |
| -0.186766667 | -0.374966667 | -0.572311111 | 0.672538559 |
| -0.0697      | 0.006933333  | -0.572688889 | 0.672362474 |
| -0.147033333 | -0.064433333 | -0.572744444 | 0.672336583 |
| -0.178366667 | -0.258633333 | -0.5735      | 0.671984565 |
| -0.368566667 | -0.358766667 | -0.573666667 | 0.671906938 |
| -0.264633333 | -0.1798      | -0.5741      | 0.671705152 |
| -0.1031      | -0.271033333 | -0.574322222 | 0.671601696 |
| -0.061533333 | 0.096333333  | -0.574433333 | 0.671549973 |
| -0.4838      | -0.6173      | -0.574533333 | 0.671503427 |
| -0.066733333 | -0.061733333 | -0.574855556 | 0.671353465 |
| -0.061066667 | -0.152666667 | -0.574977778 | 0.671296591 |
| -0.299666667 | -0.203666667 | -0.576633333 | 0.670526691 |
| -0.452533333 | -0.472766667 | -0.576888889 | 0.670407926 |
| -0.372966667 | -0.453633333 | -0.578033333 | 0.669876324 |
| -0.312       | -0.112333333 | -0.578155556 | 0.669819575 |
| -0.1676      | -0.1606      | -0.578366667 | 0.669721567 |
| -0.470766667 | -0.320166667 | -0.578433333 | 0.66969062  |
| -0.241766667 | -0.122433333 | -0.578555556 | 0.669633888 |
| -0.234066667 | -0.271366667 | -0.578644444 | 0.669592631 |
| -0.284633333 | -0.254033333 | -0.578688889 | 0.669572003 |
| -0.2118      | -0.165433333 | -0.578744444 | 0.66954622  |
| -0.463933333 | -0.536166667 | -0.579055556 | 0.669401851 |
| -0.554666667 | -0.4505      | -0.579288889 | 0.669293594 |
| -0.469966667 | -0.207966667 | -0.5796      | 0.669149279 |
| -0.1969      | -0.230266667 | -0.580133333 | 0.668901955 |
| -0.3157      | -0.406866667 | -0.581644444 | 0.668201699 |
| -0.3624      | -0.3431      | -0.5826      | 0.667759268 |
| -0.1756      | -0.073533333 | -0.582677778 | 0.667723269 |
| 0.004433333  | -0.289433333 | -0.582711111 | 0.667707842 |
| -0.5708      | -0.2928      | -0.582766667 | 0.66768213  |
| 0.0722       | -0.081       | -0.583077778 | 0.667538163 |

|              |              |              |             |
|--------------|--------------|--------------|-------------|
| -0.4334      | -0.433066667 | -0.583711111 | 0.667245182 |
| -0.0573      | 0.030433333  | -0.584222222 | 0.667008836 |
| -0.303033333 | -0.374666667 | -0.584555556 | 0.666854742 |
| -0.070733333 | -0.0656      | -0.584722222 | 0.666777708 |
| -0.397866667 | -0.3102      | -0.584744444 | 0.666767438 |
| 0.011033333  | 0.0404       | -0.585211111 | 0.666551794 |
| -0.527       | -0.547033333 | -0.585433333 | 0.666449131 |
| -0.404033333 | -0.321466667 | -0.586633333 | 0.665895025 |
| -0.687966667 | -0.497666667 | -0.587155556 | 0.66565403  |
| 0.0614       | -0.1128      | -0.588355556 | 0.665100585 |
| -0.776266667 | -0.6914      | -0.588711111 | 0.664936689 |
| -0.378133333 | -0.4506      | -0.589044444 | 0.664783074 |
| -0.085033333 | -0.145766667 | -0.589111111 | 0.664752355 |
| -0.194866667 | -0.245066667 | -0.589155556 | 0.664731877 |
| -0.232533333 | -0.1273      | -0.589277778 | 0.664675565 |
| -0.202333333 | -0.4565      | -0.589688889 | 0.664486185 |
| -0.305733333 | -0.216066667 | -0.589777778 | 0.664445245 |
| -0.208733333 | -0.1368      | -0.589844444 | 0.664414542 |
| -0.128966667 | -0.1532      | -0.589877778 | 0.664399191 |
| -0.353633333 | -0.267733333 | -0.590322222 | 0.664194544 |
| -0.651066667 | -0.449066667 | -0.590411111 | 0.664153623 |
| -0.6643      | -0.751       | -0.592022222 | 0.663412351 |
| 0.212166667  | 0.027633333  | -0.592333333 | 0.663269305 |
| -0.3312      | -0.449766667 | -0.592633333 | 0.663131396 |
| -0.002533333 | -0.0253      | -0.593522222 | 0.662722946 |
| 0.005133333  | -0.204866667 | -0.5941      | 0.662457589 |
| -0.368466667 | -0.33        | -0.594255556 | 0.662386165 |
| -0.191433333 | -0.2172      | -0.594822222 | 0.662126041 |
| -0.4158      | -0.391166667 | -0.595133333 | 0.661983272 |
| -0.282966667 | -0.3178      | -0.596122222 | 0.661529674 |
| -0.224466667 | -0.0834      | -0.597211111 | 0.661030566 |
| -0.440833333 | -0.523033333 | -0.597722222 | 0.660796421 |
| -0.0873      | -0.189233333 | -0.598166667 | 0.660592884 |
| -0.2528      | -0.106033333 | -0.598211111 | 0.660572533 |
| -0.374866667 | -0.409733333 | -0.598888889 | 0.66026227  |
| -0.3131      | -0.2591      | -0.599188889 | 0.660124986 |
| -0.652666667 | 0.203766667  | -0.599566667 | 0.659952151 |
| -0.4158      | -0.3926      | -0.600166667 | 0.659677742 |
| -0.477533333 | -0.141966667 | -0.600244444 | 0.659642179 |
| -0.2247      | -0.270833333 | -0.600933333 | 0.659327274 |
| -0.0175      | -0.1027      | -0.601422222 | 0.659103884 |
| -0.109666667 | -0.172266667 | -0.603122222 | 0.658327686 |
| -0.359633333 | -0.440866667 | -0.603511111 | 0.658150253 |
| -0.5826      | -0.4182      | -0.6044      | 0.657744872 |
| 0.062466667  | -0.239333333 | -0.604677778 | 0.657618241 |
| -0.693966667 | -0.227733333 | -0.604766667 | 0.657577724 |
| -0.196666667 | -0.2661      | -0.605533333 | 0.657228372 |

|              |              |              |             |
|--------------|--------------|--------------|-------------|
| -0.2581      | -0.205166667 | -0.605822222 | 0.65709678  |
| -0.145433333 | -0.140433333 | -0.607033333 | 0.656545393 |
| -0.242466667 | -0.169666667 | -0.607377778 | 0.656388661 |
| -0.358866667 | -0.436866667 | -0.607644444 | 0.656267346 |
| -0.154166667 | -0.201366667 | -0.608033333 | 0.656090468 |
| -0.016433333 | -0.0596      | -0.608222222 | 0.656004573 |
| -0.535733333 | -0.4727      | -0.608511111 | 0.655873226 |
| -0.420266667 | -0.333066667 | -0.609688889 | 0.655338008 |
| -0.595933333 | -0.581933333 | -0.610666667 | 0.654894007 |
| -0.5182      | -0.4318      | -0.611377778 | 0.654571286 |
| -0.260266667 | -0.045866667 | -0.611655556 | 0.654445266 |
| -0.066266667 | -0.153166667 | -0.611977778 | 0.654299114 |
| -0.3827      | -0.536333333 | -0.612666667 | 0.65398676  |
| -0.034866667 | -0.1983      | -0.613166667 | 0.653760145 |
| -0.415733333 | -0.2855      | -0.613311111 | 0.653694693 |
| -0.410133333 | -0.4781      | -0.613533333 | 0.65359401  |
| -0.149066667 | -0.090333333 | -0.613533333 | 0.65359401  |
| -0.799833333 | -0.641133333 | -0.613611111 | 0.653558775 |
| -0.3673      | -0.327       | -0.6155      | 0.652703644 |
| -0.341066667 | -0.412833333 | -0.615766667 | 0.65258301  |
| -0.087066667 | -0.111933333 | -0.616433333 | 0.652281523 |
| -0.288166667 | -0.147366667 | -0.616477778 | 0.652261428 |
| -0.262166667 | -0.348266667 | -0.616755556 | 0.652135854 |
| -0.0413      | 0.002433333  | -0.617111111 | 0.651975153 |
| -0.405633333 | -0.377733333 | -0.617311111 | 0.651884776 |
| -0.6171      | -0.605833333 | -0.617333333 | 0.651874735 |
| -0.556166667 | -0.6383      | -0.617522222 | 0.651789392 |
| -0.2704      | -0.255166667 | -0.617744444 | 0.651689003 |
| -0.378933333 | -0.205433333 | -0.6186      | 0.651302649 |
| -0.421466667 | -0.3849      | -0.619588889 | 0.65085637  |
| -0.345       | -0.259266667 | -0.620211111 | 0.650575721 |
| -0.161566667 | -0.104266667 | -0.621544444 | 0.649974739 |
| 0.070733333  | 0.002766667  | -0.622188889 | 0.649684464 |
| 0.0401       | -0.262433333 | -0.622311111 | 0.649629426 |
| -0.4407      | -0.4516      | -0.622611111 | 0.649494354 |
| -0.345433333 | -0.3812      | -0.622977778 | 0.649329303 |
| -0.283       | -0.1882      | -0.623222222 | 0.649219293 |
| -0.057433333 | -0.061966667 | -0.623644444 | 0.649029319 |
| -0.008433333 | -0.114066667 | -0.623766667 | 0.648974336 |
| -0.2569      | -0.394033333 | -0.624233333 | 0.648764447 |
| -0.328333333 | -0.339333333 | -0.624322222 | 0.648724476 |
| 0.0047       | 0.064766667  | -0.624455556 | 0.648664524 |
| -0.662966667 | -0.482966667 | -0.625622222 | 0.64814018  |
| -0.247166667 | -0.324433333 | -0.6257      | 0.648105238 |
| -0.164366667 | -0.080033333 | -0.6258      | 0.648060317 |
| -0.111033333 | -0.0973      | -0.6267      | 0.647656162 |
| 0.133666667  | -0.095       | -0.6268      | 0.647611271 |

|              |              |              |             |
|--------------|--------------|--------------|-------------|
| -0.425466667 | -0.3731      | -0.627655556 | 0.647227335 |
| -0.0685      | -0.173266667 | -0.627688889 | 0.647212381 |
| -0.041266667 | -0.0083      | -0.627966667 | 0.647087778 |
| -0.384266667 | -0.246833333 | -0.6281      | 0.647027977 |
| 0.034233333  | -0.053666667 | -0.628555556 | 0.646823699 |
| -0.15        | -0.277166667 | -0.628633333 | 0.646788829 |
| -0.489633333 | -0.275933333 | -0.628877778 | 0.646679249 |
| -0.069766667 | -0.077733333 | -0.629       | 0.646624466 |
| -0.548966667 | -0.5534      | -0.630377778 | 0.646007233 |
| -0.351466667 | -0.3065      | -0.631311111 | 0.645589441 |
| -0.335566667 | -0.294066667 | -0.631633333 | 0.645445267 |
| -0.423566667 | -0.5223      | -0.632422222 | 0.645092423 |
| -0.204733333 | -0.087633333 | -0.632888889 | 0.64488379  |
| 0.020666667  | -0.0784      | -0.633588889 | 0.644570966 |
| -0.436933333 | -0.2885      | -0.634788889 | 0.64403505  |
| 0.005666667  | -0.0828      | -0.6349      | 0.643985451 |
| 0.055066667  | 0.062266667  | -0.635088889 | 0.643901141 |
| -0.111833333 | -0.038       | -0.635355556 | 0.643782134 |
| -0.171666667 | -0.2719      | -0.636066667 | 0.643464889 |
| -0.392766667 | -0.2989      | -0.636277778 | 0.643370737 |
| -0.164566667 | -0.207933333 | -0.636411111 | 0.643311279 |
| -0.460433333 | -0.243966667 | -0.637633333 | 0.64276651  |
| -0.1674      | -0.1775      | -0.639088889 | 0.64211834  |
| -0.373633333 | -0.5056      | -0.639577778 | 0.641900781 |
| -0.417466667 | -0.437066667 | -0.6404      | 0.641535053 |
| 0.066033333  | -0.034       | -0.640577778 | 0.641456004 |
| -0.299633333 | -0.361766667 | -0.640766667 | 0.641372025 |
| -0.572266667 | -0.5495      | -0.641388889 | 0.641095466 |
| -0.3967      | -0.3681      | -0.641811111 | 0.640907869 |
| -0.101233333 | -0.033766667 | -0.642188889 | 0.640740066 |
| -0.378633333 | -0.3779      | -0.642655556 | 0.64053284  |
| -0.5176      | -0.4919      | -0.643222222 | 0.640281299 |
| -0.196       | 0.031766667  | -0.643355556 | 0.640222127 |
| -0.5512      | -0.110466667 | -0.643666667 | 0.640084081 |
| -0.4327      | -0.471966667 | -0.644488889 | 0.639719387 |
| -0.418033333 | -0.344266667 | -0.6448      | 0.639581449 |
| -0.1636      | -0.0598      | -0.646666667 | 0.638754446 |
| -0.281166667 | -0.338566667 | -0.648177778 | 0.638085751 |
| -0.507933333 | -0.445933333 | -0.648355556 | 0.638007127 |
| -0.152733333 | 0.084566667  | -0.648466667 | 0.637957992 |
| -0.275666667 | -0.057333333 | -0.650355556 | 0.637123274 |
| -0.0927      | -0.166933333 | -0.651133333 | 0.636779884 |
| -0.223366667 | -0.03        | -0.651477778 | 0.63662787  |
| -0.2411      | -0.3449      | -0.651477778 | 0.63662787  |
| -0.2955      | -0.339066667 | -0.651711111 | 0.636524914 |
| -0.3203      | -0.2735      | -0.651911111 | 0.636436679 |
| -0.074033333 | -0.053866667 | -0.652322222 | 0.636255346 |

|              |              |              |             |
|--------------|--------------|--------------|-------------|
| -0.497966667 | -0.400266667 | -0.652355556 | 0.636240645 |
| -0.451866667 | -0.235133333 | -0.652566667 | 0.63614755  |
| -0.019033333 | -0.081366667 | -0.652677778 | 0.636098558 |
| -0.538133333 | 0.147        | -0.653166667 | 0.635883039 |
| -0.275333333 | -0.327033333 | -0.653566667 | 0.635706759 |
| -0.491366667 | -0.433966667 | -0.653922222 | 0.635550107 |
| -0.231       | -0.166233333 | -0.654133333 | 0.635457113 |
| -0.413066667 | -0.481733333 | -0.654177778 | 0.635437537 |
| -0.106033333 | -0.0919      | -0.654244444 | 0.635408175 |
| -0.290066667 | -0.343833333 | -0.654444444 | 0.634879877 |
| -0.143333333 | -0.132266667 | -0.655511111 | 0.63485054  |
| -0.661633333 | -0.4644      | -0.655844444 | 0.634703875 |
| -0.528733333 | -0.436833333 | -0.656611111 | 0.634366675 |
| -0.266666667 | -0.1808      | -0.656788889 | 0.634288509 |
| -0.119366667 | -0.045166667 | -0.657055556 | 0.634171278 |
| -0.591       | -0.598166667 | -0.657366667 | 0.634034537 |
| -0.1033      | -0.099533333 | -0.657377778 | 0.634029654 |
| -0.2363      | -0.386266667 | -0.657455556 | 0.633995473 |
| -0.5792      | -0.537566667 | -0.657533333 | 0.633961294 |
| -0.047833333 | -0.143333333 | -0.657555556 | 0.633951529 |
| -0.122566667 | -0.101266667 | -0.658011111 | 0.63375138  |
| -0.049333333 | -0.212733333 | -0.658333333 | 0.633609849 |
| -0.310333333 | -0.341733333 | -0.658588889 | 0.633497623 |
| -0.117633333 | -0.178766667 | -0.659133333 | 0.633258599 |
| -0.5114      | -0.5556      | -0.659211111 | 0.63322446  |
| -0.0224      | -0.1036      | -0.659955556 | 0.632897794 |
| -0.305033333 | -0.292533333 | -0.660111111 | 0.632829557 |
| -0.195766667 | -0.175966667 | -0.660166667 | 0.632805188 |
| -0.337266667 | -0.390266667 | -0.660588889 | 0.632620017 |
| -0.477966667 | -0.272766667 | -0.661077778 | 0.632405676 |
| -0.382533333 | -0.363833333 | -0.661122222 | 0.632386194 |
| -0.6168      | -0.6663      | -0.661688889 | 0.632137852 |
| -0.291566667 | -0.352666667 | -0.661811111 | 0.632084301 |
| -0.3899      | -0.1931      | -0.662033333 | 0.631986947 |
| -0.436933333 | -0.510466667 | -0.662111111 | 0.631952877 |
| -0.609533333 | -0.438233333 | -0.6623      | 0.631870142 |
| -0.174066667 | -0.2434      | -0.662411111 | 0.631821479 |
| -0.236566667 | -0.111733333 | -0.662444444 | 0.631806881 |
| -0.212433333 | 0.012033333  | -0.6629      | 0.631607409 |
| -0.2844      | -0.265633333 | -0.663622222 | 0.631291302 |
| -0.270033333 | -0.266       | -0.664288889 | 0.63099965  |
| -0.2611      | -0.2395      | -0.664533333 | 0.630892745 |
| -0.266933333 | -0.492266667 | -0.665066667 | 0.630659561 |
| -0.510566667 | -0.4637      | -0.665533333 | 0.630455595 |
| -0.3001      | -0.1507      | -0.666966667 | 0.629829542 |
| -0.193466667 | -0.120133333 | -0.667011111 | 0.629810139 |
| -0.224933333 | -0.098433333 | -0.6673      | 0.629684037 |

|              |              |              |             |
|--------------|--------------|--------------|-------------|
| -0.453733333 | -0.482166667 | -0.6685      | 0.629160499 |
| -0.374066667 | -0.3543      | -0.668733333 | 0.62905875  |
| -0.296366667 | -0.206666667 | -0.668922222 | 0.628976394 |
| -0.068166667 | -0.0402      | -0.669055556 | 0.628918267 |
| -0.259433333 | -0.2785      | -0.669722222 | 0.628627712 |
| -0.5045      | -0.558866667 | -0.67        | 0.628506687 |
| 0.035966667  | 0.075633333  | -0.670255556 | 0.628395365 |
| -0.1041      | -0.086466667 | -0.670711111 | 0.62819697  |
| -0.3217      | -0.3703      | -0.6714      | 0.627897076 |
| -0.1463      | -0.084833333 | -0.671511111 | 0.62784872  |
| -0.268566667 | -0.320333333 | -0.671677778 | 0.627776192 |
| -0.53        | -0.411133333 | -0.671677778 | 0.627776192 |
| -0.288433333 | -0.358933333 | -0.672333333 | 0.627490998 |
| -0.311033333 | -0.4157      | -0.672488889 | 0.627423343 |
| -0.487966667 | -0.5689      | -0.672622222 | 0.62736536  |
| -0.081133333 | -0.0344      | -0.672633333 | 0.627360528 |
| -0.037733333 | -0.009866667 | -0.674044444 | 0.626747202 |
| -0.3015      | -0.385966667 | -0.674277778 | 0.626645844 |
| -0.4602      | -0.460166667 | -0.674988889 | 0.626337043 |
| -0.6499      | -0.656033333 | -0.675588889 | 0.626076611 |
| -0.0808      | -0.2117      | -0.6758      | 0.625985003 |
| -0.2739      | -0.352733333 | -0.675833333 | 0.62597054  |
| -0.048966667 | -0.1425      | -0.676844444 | 0.625531983 |
| 0.013766667  | -0.106133333 | -0.677366667 | 0.625305596 |
| 0.299233333  | 0.463466667  | -0.677611111 | 0.625199656 |
| -0.6511      | -0.597833333 | -0.6777      | 0.625161136 |
| -0.469733333 | -0.358266667 | -0.677722222 | 0.625151507 |
| -0.542866667 | -0.493266667 | -0.679311111 | 0.624463385 |
| -0.4097      | -0.3382      | -0.679433333 | 0.624410484 |
| -0.539566667 | -0.643033333 | -0.679466667 | 0.624396058 |
| -0.0417      | 0.0046       | -0.679877778 | 0.624218155 |
| -0.3541      | -0.352033333 | -0.680611111 | 0.62390094  |
| -0.2239      | -0.175366667 | -0.681288889 | 0.623607901 |
| -0.285766667 | -0.398833333 | -0.681833333 | 0.623372608 |
| -0.249166667 | -0.372733333 | -0.682       | 0.623300597 |
| -0.082533333 | -0.191066667 | -0.682155556 | 0.623233395 |
| -0.172533333 | -0.2856      | -0.6829      | 0.622911883 |
| -0.6143      | -0.6561      | -0.682944444 | 0.622892694 |
| -0.458733333 | -0.4912      | -0.683177778 | 0.622791959 |
| -0.477966667 | -0.4897      | -0.6834      | 0.622696036 |
| -0.0077      | 0.0995       | -0.683888889 | 0.622485057 |
| -0.164533333 | -0.278366667 | -0.684622222 | 0.622168724 |
| -0.656933333 | -0.6105      | -0.684922222 | 0.622039361 |
| -0.239033333 | -0.1215      | -0.685333333 | 0.621862129 |
| -0.3783      | -0.1053      | -0.685733333 | 0.621689736 |
| -0.272566667 | -0.222933333 | -0.685766667 | 0.621675373 |
| -0.514033333 | -0.5189      | -0.685766667 | 0.621675373 |

|              |              |              |             |
|--------------|--------------|--------------|-------------|
| -0.5147      | -0.537233333 | -0.685888889 | 0.621622708 |
| -0.523633333 | -0.162466667 | -0.686666667 | 0.621287672 |
| -0.461833333 | -0.323033333 | -0.686966667 | 0.621158493 |
| -0.482766667 | -0.472666667 | -0.687166667 | 0.621072388 |
| 0.045133333  | -0.0485      | -0.6877      | 0.620842833 |
| -0.222166667 | -0.421133333 | -0.6878      | 0.620799801 |
| -0.602133333 | -0.421233333 | -0.688077778 | 0.620680283 |
| -0.376833333 | -0.289066667 | -0.688555556 | 0.620474766 |
| -0.351633333 | -0.432966667 | -0.689333333 | 0.620140349 |
| -0.301533333 | -0.220966667 | -0.690711111 | 0.619548396 |
| -0.001033333 | -0.0176      | -0.690922222 | 0.619457744 |
| -0.1666      | 0.0305       | -0.691077778 | 0.619390956 |
| -0.220766667 | -0.245866667 | -0.6915      | 0.61920971  |
| -0.3985      | -0.307166667 | -0.691911111 | 0.619033285 |
| -0.492533333 | -0.7158      | -0.692144444 | 0.618933174 |
| -0.063266667 | -0.0313      | -0.692566667 | 0.618752062 |
| -0.225733333 | -0.3179      | -0.692733333 | 0.618680585 |
| -0.267366667 | -0.287866667 | -0.692788889 | 0.618656761 |
| -0.327066667 | -0.182133333 | -0.692844444 | 0.618632939 |
| -0.8428      | -0.765066667 | -0.695288889 | 0.617585639 |
| -0.514966667 | -0.4403      | -0.695544444 | 0.617476251 |
| -0.152866667 | -0.245133333 | -0.696666667 | 0.616996125 |
| -0.505833333 | -0.2963      | -0.697011111 | 0.616848834 |
| -0.650633333 | -0.553633333 | -0.697522222 | 0.616630339 |
| -0.034266667 | 0.252466667  | -0.699355556 | 0.615847241 |
| -0.491966667 | -0.4949      | -0.699433333 | 0.615814041 |
| 0.2233       | 0.229033333  | -0.699655556 | 0.615719193 |
| -0.352666667 | -0.1627      | -0.699811111 | 0.615652807 |
| -0.418166667 | -0.481633333 | -0.7         | 0.615572207 |
| 0.162366667  | 0.096533333  | -0.700366667 | 0.615415776 |
| -0.368833333 | -0.386733333 | -0.701177778 | 0.615069875 |
| -0.223033333 | -0.324633333 | -0.701555556 | 0.614908837 |
| -0.159633333 | -0.061533333 | -0.702155556 | 0.614653156 |
| -0.0575      | -0.1056      | -0.703366667 | 0.614137385 |
| -0.113466667 | -0.221633333 | -0.703688889 | 0.614000234 |
| -0.174466667 | -0.252233333 | -0.704311111 | 0.613735478 |
| -0.305333333 | -0.3987      | -0.705211111 | 0.613352729 |
| -0.094966667 | -0.198833333 | -0.706477778 | 0.61281445  |
| -0.468733333 | -0.5099      | -0.707233333 | 0.612493597 |
| 0.022966667  | 0.104533333  | -0.707455556 | 0.61239926  |
| -0.582333333 | -0.558833333 | -0.7075      | 0.612380394 |
| 0.022533333  | -0.071033333 | -0.708011111 | 0.612163482 |
| -0.0214      | 0.0134       | -0.708188889 | 0.612088052 |
| -0.376366667 | -0.159366667 | -0.709       | 0.611744021 |
| -0.5041      | -0.2518      | -0.710466667 | 0.611122428 |
| -0.2001      | -0.086166667 | -0.712377778 | 0.610313421 |
| -0.017233333 | -0.057766667 | -0.713044444 | 0.610031462 |

|              |              |              |             |
|--------------|--------------|--------------|-------------|
| -0.198966667 | -0.314033333 | -0.714677778 | 0.609341211 |
| -0.322033333 | -0.2172      | -0.714955556 | 0.6092239   |
| -0.4133      | -0.463       | -0.715       | 0.609205132 |
| -0.2443      | -0.3087      | -0.715477778 | 0.609003415 |
| 0.048566667  | -0.013133333 | -0.716922222 | 0.608393978 |
| 0.1146       | 0.093233333  | -0.7171      | 0.608319012 |
| -0.499033333 | -0.6407      | -0.717655556 | 0.608084805 |
| -0.448266667 | -0.360666667 | -0.719033333 | 0.607504359 |
| -0.1116      | -0.1384      | -0.720311111 | 0.606966538 |
| -0.086766667 | -0.161666667 | -0.720988889 | 0.606681453 |
| -0.310066667 | -0.5184      | -0.721066667 | 0.606648746 |
| -0.4412      | -0.6107      | -0.721711111 | 0.60637782  |
| -0.0201      | -0.0902      | -0.723277778 | 0.605719693 |
| -0.002666667 | 0.1368       | -0.723333333 | 0.605696368 |
| -0.550533333 | -0.635833333 | -0.724211111 | 0.605327957 |
| -0.401233333 | -0.437333333 | -0.724955556 | 0.605015683 |
| -0.354533333 | -0.4185      | -0.725855556 | 0.604638372 |
| -0.205633333 | -0.354766667 | -0.726733333 | 0.604270604 |
| -0.4755      | -0.599333333 | -0.727055556 | 0.604135657 |
| -0.502866667 | -0.788333333 | -0.729877778 | 0.602954993 |
| -0.448133333 | -0.3586      | -0.730233333 | 0.602806411 |
| -0.021166667 | -0.0554      | -0.731888889 | 0.602115062 |
| -0.4446      | -0.5133      | -0.733111111 | 0.601605178 |
| -0.4796      | -0.5178      | -0.734233333 | 0.601137392 |
| -0.242366667 | -0.0343      | -0.734466667 | 0.601040175 |
| -0.573766667 | -0.455266667 | -0.735555556 | 0.600586705 |
| -0.1183      | -0.455633333 | -0.735655556 | 0.600545077 |
| -0.389533333 | -0.213533333 | -0.736622222 | 0.600142821 |
| -0.114166667 | -0.259766667 | -0.736922222 | 0.600018038 |
| -0.438166667 | -0.295366667 | -0.737811111 | 0.599648462 |
| -0.3972      | -0.187866667 | -0.739144444 | 0.599094526 |
| -0.597866667 | -0.4261      | -0.740444444 | 0.59855493  |
| -0.458       | -0.439466667 | -0.740844444 | 0.598388998 |
| -0.256866667 | -0.325966667 | -0.741088889 | 0.598287618 |
| -0.456233333 | -0.461066667 | -0.7411      | 0.59828301  |
| -0.367366667 | -0.357433333 | -0.742566667 | 0.597675095 |
| -0.443933333 | -0.154666667 | -0.743622222 | 0.597237963 |
| -0.585166667 | -0.324666667 | -0.743988889 | 0.597086192 |
| -0.342533333 | -0.3536      | -0.744255556 | 0.596975837 |
| -0.2246      | -0.2306      | -0.744477778 | 0.596883891 |
| -0.017333333 | 0.141966667  | -0.746833333 | 0.595910126 |
| -0.2062      | -0.4372      | -0.747077778 | 0.595809165 |
| -0.680566667 | -0.612233333 | -0.747455556 | 0.59565317  |
| 0.048133333  | 0.027133333  | -0.748044444 | 0.595410082 |
| -0.386333333 | -0.366666667 | -0.748066667 | 0.595400911 |
| -0.196766667 | -0.403633333 | -0.748155556 | 0.595364227 |
| -0.1307      | -0.216833333 | -0.748544444 | 0.595203764 |



|              |              |              |             |
|--------------|--------------|--------------|-------------|
| -0.176233333 | -0.175133333 | -0.749544444 | 0.594791343 |
| -0.3076      | -0.242833333 | -0.749555556 | 0.594786763 |
| -0.3002      | -0.404233333 | -0.749811111 | 0.594681413 |
| -0.084366667 | 0.059066667  | -0.750111111 | 0.594557765 |
| 0.0246       | 0.061033333  | -0.750144444 | 0.594544028 |
| -0.086633333 | -0.182466667 | -0.750377778 | 0.594447878 |
| -0.3476      | -0.375366667 | -0.750444444 | 0.594420409 |
| -0.043666667 | -0.1674      | -0.750988889 | 0.594196129 |
| -0.0221      | -0.125866667 | -0.751955556 | 0.593798126 |
| -0.538033333 | -0.496233333 | -0.752444444 | 0.593596938 |
| -0.275266667 | -0.2949      | -0.753122222 | 0.593318132 |
| -0.224033333 | -0.349       | -0.753344444 | 0.593226749 |
| -0.478666667 | -0.444166667 | -0.753377778 | 0.593213042 |
| -0.0639      | -0.064166667 | -0.753777778 | 0.593048592 |
| -0.285366667 | -0.345233333 | -0.754511111 | 0.592747217 |
| -0.117266667 | -0.1955      | -0.754811111 | 0.592623971 |
| -0.129266667 | -0.103566667 | -0.754966667 | 0.592560076 |
| -0.404433333 | -0.482533333 | -0.755077778 | 0.592514441 |
| -0.276066667 | -0.4336      | -0.756711111 | 0.591844011 |
| -0.629166667 | -0.719533333 | -0.757222222 | 0.591634373 |
| -0.469       | -0.365966667 | -0.757322222 | 0.591593365 |
| 0.184766667  | -0.0744      | -0.757755556 | 0.591415699 |
| -0.337166667 | -0.451333333 | -0.7583      | 0.591192552 |
| -0.414966667 | -0.400433333 | -0.759088889 | 0.590869367 |
| -0.356933333 | -0.459533333 | -0.759311111 | 0.590778361 |
| -0.6434      | -0.6755      | -0.7596      | 0.590660074 |
| -0.2255      | -0.282766667 | -0.760066667 | 0.590469045 |
| -0.2833      | -0.3404      | -0.7608      | 0.590168981 |
| -0.038266667 | 0.016433333  | -0.7609      | 0.590128075 |
| -0.528633333 | -0.3705      | -0.761022222 | 0.590078082 |
| -0.446566667 | -0.370866667 | -0.762855556 | 0.589328705 |
| -0.441833333 | -0.605733333 | -0.763433333 | 0.589092735 |
| -0.555533333 | -0.665333333 | -0.765211111 | 0.588367266 |
| -0.087266667 | 0.062466667  | -0.765455556 | 0.588267584 |
| -0.266533333 | -0.173166667 | -0.765566667 | 0.588222279 |
| 0.040433333  | -0.023633333 | -0.766566667 | 0.587814696 |
| -0.2738      | -0.228333333 | -0.766811111 | 0.587715107 |
| -0.5675      | -0.527966667 | -0.768577778 | 0.586995855 |
| -0.2296      | -0.0642      | -0.770255556 | 0.586313607 |
| -0.761666667 | -0.586633333 | -0.770366667 | 0.586268453 |
| -0.143066667 | 0.043866667  | -0.770466667 | 0.586227818 |
| -0.078966667 | -0.029933333 | -0.772011111 | 0.585600581 |
| -0.436466667 | -0.4126      | -0.7734      | 0.585037092 |
| -0.024266667 | -0.0691      | -0.773533333 | 0.584983025 |
| -0.002833333 | -0.0277      | -0.773755556 | 0.584892926 |
| -0.2924      | -0.228       | -0.774566667 | 0.58456418  |
| -0.048766667 | -0.024266667 | -0.776166667 | 0.583916237 |

|              |              |              |             |
|--------------|--------------|--------------|-------------|
| -0.045966667 | 0.076533333  | -0.7783      | 0.58305343  |
| -0.160966667 | -0.3526      | -0.779211111 | 0.582685328 |
| -0.366       | -0.280266667 | -0.780444444 | 0.582187414 |
| -0.080866667 | -0.153133333 | -0.7817      | 0.581680965 |
| -0.346366667 | -0.276       | -0.781777778 | 0.581649607 |
| -0.0165      | -0.4496      | -0.783155556 | 0.581094395 |
| -0.147       | -0.137766667 | -0.785977778 | 0.57995876  |
| -0.218       | -0.3783      | -0.786011111 | 0.579945361 |
| -0.4995      | -0.353566667 | -0.7861      | 0.57990963  |
| -0.285866667 | -0.2443      | -0.786411111 | 0.579784588 |
| -0.459533333 | -0.549666667 | -0.786555556 | 0.579726542 |
| -0.265366667 | -0.218533333 | -0.787588889 | 0.57931146  |
| -0.157133333 | -0.252666667 | -0.787633333 | 0.579293614 |
| -0.1399      | -0.222266667 | -0.788144444 | 0.579088421 |
| 0.080033333  | -0.049466667 | -0.7884      | 0.578985852 |
| -0.135966667 | -0.046033333 | -0.788433333 | 0.578972475 |
| -0.525466667 | -0.557866667 | -0.788588889 | 0.578910051 |
| -0.174633333 | -0.297233333 | -0.788922222 | 0.57877631  |
| -0.249033333 | -0.157766667 | -0.788955556 | 0.578762938 |
| -0.124333333 | -0.131433333 | -0.790622222 | 0.578094711 |
| -0.642966667 | -0.601666667 | -0.790744444 | 0.578045738 |
| -0.3259      | -0.450433333 | -0.792433333 | 0.577369445 |
| -0.1933      | -0.150466667 | -0.793733333 | 0.576849417 |
| -0.186266667 | 0.0127       | -0.795666667 | 0.576076908 |
| -0.7008      | -0.674266667 | -0.795877778 | 0.575992616 |
| -0.634633333 | -0.207733333 | -0.7965      | 0.575744249 |
| 0.019366667  | -0.043533333 | -0.7967      | 0.575664439 |
| -0.120666667 | -0.1241      | -0.798744444 | 0.574849242 |
| 0.064533333  | 0.2601       | -0.7996      | 0.574508443 |
| -0.262033333 | -0.430533333 | -0.799855556 | 0.574406685 |
| -0.4353      | -0.2974      | -0.8009      | 0.573990992 |
| -0.520033333 | -0.4048      | -0.801244444 | 0.573853967 |
| -0.413633333 | -0.3021      | -0.803211111 | 0.573072228 |
| -0.322766667 | -0.283333333 | -0.803944444 | 0.572781005 |
| -0.263966667 | -0.180966667 | -0.804311111 | 0.572635449 |
| -0.8154      | -0.595566667 | -0.804433333 | 0.572586939 |
| -0.3808      | -0.298933333 | -0.806566667 | 0.571740872 |
| -0.362633333 | -0.413366667 | -0.807277778 | 0.571459128 |
| -0.042       | -0.164533333 | -0.807622222 | 0.571322708 |
| 0.099966667  | -0.1201      | -0.808566667 | 0.57094882  |
| -0.425933333 | -0.186033333 | -0.809444444 | 0.570601544 |
| -0.6936      | -0.573066667 | -0.809488889 | 0.570583966 |
| -0.5699      | -0.665866667 | -0.809511111 | 0.570575177 |
| -0.242066667 | 0.000266667  | -0.809744444 | 0.570482903 |
| -0.020466667 | -0.069566667 | -0.810833333 | 0.570052488 |
| -0.153033333 | -0.3291      | -0.810988889 | 0.569991026 |
| -0.582233333 | -0.764533333 | -0.811122222 | 0.56993835  |

|              |              |              |             |
|--------------|--------------|--------------|-------------|
| -0.460266667 | -0.4548      | -0.811788889 | 0.569675044 |
| -0.446366667 | -0.463633333 | -0.812122222 | 0.569543436 |
| -0.266033333 | -0.3864      | -0.812311111 | 0.569468872 |
| -0.312233333 | -0.266733333 | -0.812588889 | 0.569359236 |
| 0.149966667  | 0.121233333  | -0.812611111 | 0.569350466 |
| -0.747266667 | -0.628533333 | -0.814133333 | 0.568750048 |
| 0.0814       | -0.0127      | -0.814655556 | 0.568544211 |
| -0.2002      | -0.189933333 | -0.8148      | 0.56848729  |
| -0.4176      | -0.3702      | -0.8148      | 0.56848729  |
| -0.471966667 | -0.328233333 | -0.815477778 | 0.568220278 |
| -0.501933333 | -0.576266667 | -0.815666667 | 0.568145887 |
| -0.2433      | -0.3935      | -0.817144444 | 0.567564223 |
| -0.5052      | -0.4913      | -0.819322222 | 0.566708119 |
| -0.1607      | -0.143366667 | -0.819711111 | 0.56655538  |
| -0.080666667 | -0.221166667 | -0.820155556 | 0.566380871 |
| -0.1252      | -0.160666667 | -0.8204      | 0.566284913 |
| -0.645533333 | -0.680666667 | -0.820566667 | 0.566219497 |
| -0.177766667 | -0.364433333 | -0.821566667 | 0.56582716  |
| -0.557       | -0.462933333 | -0.821644444 | 0.565796656 |
| -0.2661      | -0.294066667 | -0.822       | 0.565657231 |
| -0.2182      | -0.2474      | -0.823844444 | 0.564934517 |
| -0.351166667 | -0.4622      | -0.824077778 | 0.564843155 |
| -0.787233333 | -1.069633333 | -0.824344444 | 0.564738759 |
| -0.512633333 | -0.144233333 | -0.824644444 | 0.564621338 |
| -0.3771      | -0.331633333 | -0.826711111 | 0.563813094 |
| -0.2103      | -0.079133333 | -0.828955556 | 0.562936635 |
| -0.212233333 | -0.2222      | -0.830833333 | 0.562204407 |
| -0.249366667 | -0.271366667 | -0.831044444 | 0.562122145 |
| -0.076166667 | -0.1881      | -0.831111111 | 0.56209617  |
| -0.3158      | -0.369133333 | -0.831322222 | 0.562013924 |
| -0.0734      | -0.1718      | -0.831522222 | 0.561936017 |
| -0.4727      | -0.5186      | -0.832166667 | 0.561685059 |
| -0.801566667 | -0.978833333 | -0.8322      | 0.561672082 |
| -0.284033333 | -0.301666667 | -0.833944444 | 0.560993343 |
| -0.237333333 | -0.044166667 | -0.834955556 | 0.560600309 |
| -0.698133333 | -0.803833333 | -0.8351      | 0.560544184 |
| -0.591866667 | -0.452666667 | -0.837511111 | 0.559608154 |
| -0.437166667 | -0.3945      | -0.838844444 | 0.559091205 |
| -0.1014      | -0.408966667 | -0.839011111 | 0.55902662  |
| -0.897766667 | -0.917566667 | -0.839266667 | 0.558927604 |
| -0.7237      | -0.382633333 | -0.843511111 | 0.557285642 |
| -0.024166667 | -0.136733333 | -0.843744444 | 0.557195517 |
| -0.561133333 | -0.623566667 | -0.844377778 | 0.556950966 |
| -0.1666      | -0.3413      | -0.844688889 | 0.556830874 |
| -0.414733333 | -0.2496      | -0.844722222 | 0.556818009 |
| -0.7639      | -0.291033333 | -0.8488      | 0.555246385 |
| -0.396266667 | -0.1909      | -0.849311111 | 0.55504971  |

|              |              |              |             |
|--------------|--------------|--------------|-------------|
| -0.531833333 | -0.579033333 | -0.849633333 | 0.554925755 |
| -0.040933333 | 0.005933333  | -0.854644444 | 0.553001598 |
| 0.026366667  | 0.1353       | -0.857511111 | 0.551903863 |
| -0.094166667 | -0.1416      | -0.858388889 | 0.551568171 |
| -0.198166667 | -0.063166667 | -0.859777778 | 0.551037429 |
| -0.6357      | -0.671833333 | -0.860611111 | 0.550719229 |
| -0.436333333 | -0.6302      | -0.860677778 | 0.550693781 |
| -0.2691      | -0.525333333 | -0.861066667 | 0.550545358 |
| -0.371633333 | -0.318333333 | -0.864977778 | 0.549054864 |
| 0.027833333  | -0.059033333 | -0.865044444 | 0.549029493 |
| -0.474966667 | -0.5317      | -0.867933333 | 0.547931202 |
| -0.653666667 | -0.413366667 | -0.868688889 | 0.54764432  |
| -0.0844      | -0.0567      | -0.87        | 0.547146851 |
| -0.228833333 | -0.117166667 | -0.870244444 | 0.547054152 |
| -0.456966667 | -0.3866      | -0.872122222 | 0.546342583 |
| -0.555366667 | -0.567033333 | -0.874144444 | 0.545577312 |
| -0.360366667 | -0.378233333 | -0.876444444 | 0.544708224 |
| -0.593733333 | -0.658966667 | -0.876522222 | 0.544678859 |
| -0.575333333 | -0.6052      | -0.876955556 | 0.544515282 |
| -0.407033333 | -0.4109      | -0.878955556 | 0.543760947 |
| -0.627933333 | -0.502533333 | -0.879711111 | 0.543476247 |
| -0.699466667 | -0.6832      | -0.880588889 | 0.543145681 |
| -0.588966667 | -0.541966667 | -0.881       | 0.542990928 |
| -0.5209      | -0.4646      | -0.881722222 | 0.542719172 |
| -0.191033333 | -0.305933333 | -0.883211111 | 0.542159364 |
| -0.2089      | -0.2566      | -0.8838      | 0.541938107 |
| -0.347066667 | -0.5552      | -0.885855556 | 0.541166502 |
| -0.843466667 | -1.031933333 | -0.8867      | 0.540849837 |
| -0.6272      | -0.4503      | -0.8876      | 0.540512542 |
| -0.410966667 | -0.217833333 | -0.887988889 | 0.540366863 |
| -0.836866667 | -0.744466667 | -0.888288889 | 0.540254508 |
| 0.036766667  | 0.1818       | -0.889433333 | 0.539826111 |
| -0.2632      | -0.470666667 | -0.891222222 | 0.539157162 |
| -0.5652      | -0.538266667 | -0.892111111 | 0.538825073 |
| -0.134133333 | -0.2789      | -0.892833333 | 0.538555401 |
| -0.170633333 | -0.202166667 | -0.898111111 | 0.536588815 |
| -0.3302      | -0.348466667 | -0.9003      | 0.535775308 |
| -0.005066667 | 0.123633333  | -0.900711111 | 0.535622655 |
| -0.396       | -0.184333333 | -0.9017      | 0.535255641 |
| -0.0703      | -0.0218      | -0.903533333 | 0.534575886 |
| -0.5277      | -0.4031      | -0.904122222 | 0.534357724 |
| -0.459866667 | -0.487333333 | -0.905655556 | 0.533790097 |
| -1.0476      | -0.971866667 | -0.9082      | 0.532849494 |
| 0.295666667  | 0.1474       | -0.9085      | 0.532738703 |
| -0.170033333 | -0.382566667 | -0.910388889 | 0.532041656 |
| -0.535533333 | -0.650666667 | -0.911088889 | 0.531783571 |
| 0.106533333  | 0.1358       | -0.911711111 | 0.531554266 |

|              |              |              |             |
|--------------|--------------|--------------|-------------|
| -0.409266667 | -0.367       | -0.9119      | 0.531484676 |
| -0.494566667 | -0.543866667 | -0.913155556 | 0.531022334 |
| -0.8165      | -0.868666667 | -0.913422222 | 0.530924189 |
| -0.582466667 | -0.4824      | -0.914566667 | 0.530503191 |
| -0.473633333 | -0.2784      | -0.915233333 | 0.530258103 |
| -0.334933333 | -0.496766667 | -0.915988889 | 0.529980473 |
| -0.5323      | -0.5516      | -0.918311111 | 0.529128081 |
| -0.665766667 | -0.590266667 | -0.918622222 | 0.529013989 |
| 0.167566667  | -0.2048      | -0.919822222 | 0.52857415  |
| -0.5554      | -0.609233333 | -0.922022222 | 0.527768729 |
| -0.6148      | -0.765933333 | -0.922422222 | 0.527622421 |
| -0.174366667 | -0.091766667 | -0.9225      | 0.527593977 |
| -0.533466667 | -0.3699      | -0.926344444 | 0.526189934 |
| -0.461566667 | -0.418433333 | -0.926877778 | 0.525995449 |
| -0.300566667 | -0.4657      | -0.926955556 | 0.525967093 |
| -0.7213      | -0.789       | -0.926977778 | 0.525958991 |
| -0.024966667 | -0.073566667 | -0.928455556 | 0.525420518 |
| -0.051666667 | 0.015666667  | -0.930955556 | 0.524510822 |
| -0.2947      | -0.4711      | -0.931244444 | 0.524405803 |
| -0.4497      | -0.383266667 | -0.931511111 | 0.524308881 |
| -0.521166667 | -0.577466667 | -0.932211111 | 0.524054547 |
| -0.440133333 | -0.5077      | -0.933733333 | 0.523501896 |
| -0.450166667 | -0.295266667 | -0.9339      | 0.523441422 |
| -0.498566667 | -0.4271      | -0.935233333 | 0.522957883 |
| -0.179566667 | 0.033166667  | -0.935288889 | 0.522937745 |
| -0.8273      | -0.711866667 | -0.935633333 | 0.522812908 |
| -1.073566667 | -0.7857      | -0.936144444 | 0.522627721 |
| -0.4067      | -0.5359      | -0.936366667 | 0.522547226 |
| -0.273733333 | -0.257433333 | -0.936444444 | 0.522519055 |
| -0.160066667 | -0.238333333 | -0.937422222 | 0.522165041 |
| -0.9138      | -0.757733333 | -0.940711111 | 0.520976026 |
| -0.933766667 | -0.803       | -0.941377778 | 0.520735339 |
| -0.722233333 | -0.777933333 | -0.941411111 | 0.520723308 |
| -0.497333333 | -0.300633333 | -0.942122222 | 0.520466704 |
| -0.287433333 | -0.276833333 | -0.942188889 | 0.520442654 |
| -0.265233333 | -0.209566667 | -0.944566667 | 0.519585593 |
| -0.006466667 | -0.1393      | -0.947344444 | 0.518586141 |
| -0.457733333 | -0.4571      | -0.953166667 | 0.516497522 |
| -0.1557      | -0.141533333 | -0.9533      | 0.51644979  |
| -0.5541      | -0.542366667 | -0.953555556 | 0.516358315 |
| -0.900433333 | -0.611733333 | -0.953988889 | 0.516203243 |
| -0.153333333 | -0.261866667 | -0.9556      | 0.515627102 |
| -0.271833333 | -0.377966667 | -0.9556      | 0.515627102 |
| -0.330166667 | -0.279       | -0.958944444 | 0.514433163 |
| -0.215966667 | -0.274866667 | -0.959933333 | 0.514080668 |
| -0.344966667 | -0.228333333 | -0.960022222 | 0.514048995 |
| -0.597933333 | -0.5445      | -0.969722222 | 0.510604366 |

|              |              |              |             |
|--------------|--------------|--------------|-------------|
| -0.414866667 | -0.440166667 | -0.9704      | 0.51036454  |
| -0.5756      | -0.644633333 | -0.972277778 | 0.509700694 |
| -0.9494      | -1.1586      | -0.972333333 | 0.509681067 |
| -0.757133333 | -0.848766667 | -0.972677778 | 0.509559394 |
| -0.4064      | -0.589066667 | -0.978022222 | 0.507675231 |
| -0.1998      | -0.204       | -0.978788889 | 0.507405517 |
| -0.872966667 | -0.905433333 | -0.982788889 | 0.506000639 |
| -0.6168      | -0.7192      | -0.984466667 | 0.505412529 |
| -0.590933333 | -0.4787      | -0.987111111 | 0.504486962 |
| -0.6765      | -0.589866667 | -0.989366667 | 0.503698847 |
| -0.4453      | -0.304033333 | -0.9894      | 0.503687209 |
| -0.4731      | -0.6477      | -0.990788889 | 0.503202541 |
| -0.255466667 | -0.473566667 | -0.993711111 | 0.50218432  |
| -0.723466667 | -0.7791      | -0.994255556 | 0.501994842 |
| -0.577366667 | -0.3737      | -0.995066667 | 0.50171269  |
| -0.581866667 | -0.4332      | -0.995166667 | 0.501677915 |
| -0.395033333 | -0.239866667 | -0.996022222 | 0.501380495 |
| -0.083       | -0.188366667 | -0.996744444 | 0.501129564 |
| -0.830633333 | -0.746233333 | -0.997588889 | 0.500836326 |
| -0.7695      | -0.728066667 | -1.000155556 | 0.499946091 |
| -0.325566667 | -0.2364      | -1.000866667 | 0.499699726 |
| -0.688       | -0.646433333 | -1.001611111 | 0.499441943 |
| -0.5542      | -0.406766667 | -1.006477778 | 0.497760006 |
| 0.0779       | 0.0693       | -1.006633333 | 0.497706339 |
| -0.4046      | -0.388566667 | -1.009677778 | 0.496657162 |
| -0.253333333 | -0.298866667 | -1.010822222 | 0.496263336 |
| -0.4484      | -0.512966667 | -1.010933333 | 0.496225117 |
| -0.417533333 | -0.4111      | -1.011277778 | 0.496106657 |
| -0.397733333 | -0.557133333 | -1.013611111 | 0.495304931 |
| -0.531533333 | -0.7614      | -1.016322222 | 0.494375028 |
| -0.4353      | -0.496333333 | -1.021044444 | 0.492759488 |
| -0.3168      | -0.396133333 | -1.022733333 | 0.492182977 |
| -0.798766667 | -0.875033333 | -1.024311111 | 0.491645004 |
| -0.514666667 | -0.5865      | -1.025322222 | 0.491300556 |
| -0.5999      | -0.6435      | -1.026655556 | 0.490846708 |
| -0.6505      | -0.5299      | -1.028033333 | 0.490378172 |
| 0.018033333  | 0.140966667  | -1.030766667 | 0.48944998  |
| -0.4035      | -0.237866667 | -1.031366667 | 0.489246465 |
| -0.065033333 | -0.1222      | -1.033977778 | 0.488361787 |
| -0.9816      | -0.879066667 | -1.034011111 | 0.488350503 |
| -0.545766667 | -0.607133333 | -1.035422222 | 0.487873078 |
| -0.469233333 | -0.547266667 | -1.035455556 | 0.487861805 |
| -0.4881      | -0.472566667 | -1.036055556 | 0.487658952 |
| -0.7374      | -0.6436      | -1.037077778 | 0.487313543 |
| -0.142       | -0.051766667 | -1.038666667 | 0.486777143 |
| -0.7588      | -0.813533333 | -1.041288889 | 0.485893188 |
| -1.133133333 | -1.2046      | -1.041566667 | 0.485799642 |

|              |              |              |             |
|--------------|--------------|--------------|-------------|
| -0.45        | -0.418033333 | -1.042455556 | 0.485500419 |
| 0.0798       | -0.257366667 | -1.043788889 | 0.485051928 |
| -0.222433333 | -0.237833333 | -1.044944444 | 0.484663572 |
| -0.903666667 | -0.718566667 | -1.046988889 | 0.483977241 |
| -0.441033333 | -0.2535      | -1.047122222 | 0.483932514 |
| -0.6151      | -0.427766667 | -1.049966667 | 0.482979324 |
| -0.308166667 | -0.311633333 | -1.054744444 | 0.481382485 |
| -0.609466667 | -0.462033333 | -1.056588889 | 0.480767444 |
| -0.690033333 | -0.6924      | -1.060755556 | 0.479380937 |
| -0.4571      | -0.478933333 | -1.061622222 | 0.479093046 |
| -0.5083      | -0.5891      | -1.063       | 0.478635729 |
| -0.2528      | -0.294566667 | -1.067222222 | 0.477236991 |
| -0.605966667 | -0.489333333 | -1.068277778 | 0.476887946 |
| -0.170366667 | -0.277833333 | -1.068622222 | 0.476774102 |
| -0.509066667 | -0.5608      | -1.071355556 | 0.47587166  |
| -0.3875      | -0.341066667 | -1.076366667 | 0.474221617 |
| -0.424433333 | -0.422366667 | -1.080655556 | 0.47281393  |
| -0.140133333 | -0.1738      | -1.080955556 | 0.472715621 |
| -0.4384      | -0.514333333 | -1.082988889 | 0.472049845 |
| -0.7016      | -0.5058      | -1.085611111 | 0.471192633 |
| -0.343733333 | -0.3835      | -1.0857      | 0.471163602 |
| -0.346033333 | -0.265666667 | -1.088033333 | 0.470402185 |
| -0.449966667 | -0.527066667 | -1.090088889 | 0.469732432 |
| -0.271566667 | -0.278866667 | -1.090988889 | 0.469439489 |
| -0.2683      | -0.161733333 | -1.092244444 | 0.469031121 |
| -0.423       | -0.3598      | -1.093211111 | 0.468716955 |
| -0.9477      | -0.812266667 | -1.097333333 | 0.467379599 |
| -1.2134      | -1.1617      | -1.097822222 | 0.467221244 |
| -0.710866667 | -0.435566667 | -1.098322222 | 0.467059345 |
| -0.9126      | -0.6542      | -1.099233333 | 0.466764475 |
| -0.554266667 | -0.625466667 | -1.107866667 | 0.463979617 |
| -0.2608      | -0.105533333 | -1.109766667 | 0.463368968 |
| -0.195666667 | -0.195133333 | -1.113022222 | 0.462324518 |
| -0.628       | -0.680933333 | -1.113144444 | 0.462285352 |
| -0.538       | -0.680533333 | -1.113322222 | 0.46222839  |
| -0.970066667 | -1.015666667 | -1.115722222 | 0.461460088 |
| -0.505266667 | -0.4848      | -1.1168      | 0.461115479 |
| -0.7601      | -0.608333333 | -1.116866667 | 0.461094171 |
| -0.514266667 | -0.5977      | -1.119133333 | 0.460370299 |
| -0.468333333 | -0.597533333 | -1.121911111 | 0.459484751 |
| -0.540466667 | -0.612366667 | -1.122266667 | 0.459371524 |
| -0.4759      | -0.522633333 | -1.124877778 | 0.458540867 |
| -0.0795      | -0.154566667 | -1.127755556 | 0.457627116 |
| -1.1348      | -0.9801      | -1.128766667 | 0.457306501 |
| -0.537433333 | -0.567933333 | -1.1308      | 0.456662427 |
| -0.567966667 | -0.6745      | -1.131144444 | 0.456553412 |
| -0.510966667 | -0.459066667 | -1.132155556 | 0.456233549 |

|              |              |              |             |
|--------------|--------------|--------------|-------------|
| -0.673666667 | -0.588633333 | -1.132888889 | 0.456001701 |
| -0.664       | -0.509566667 | -1.133577778 | 0.455784012 |
| -0.018366667 | -0.012866667 | -1.134844444 | 0.455384015 |
| -0.1491      | 0.067466667  | -1.1353      | 0.455240242 |
| -0.465966667 | -0.5718      | -1.135877778 | 0.455057962 |
| -0.662933333 | -0.500933333 | -1.137677778 | 0.454490556 |
| -0.0686      | 0.0154       | -1.149333333 | 0.450833512 |
| -0.572233333 | -0.593066667 | -1.152522222 | 0.449838104 |
| -0.446       | -0.432433333 | -1.1552      | 0.449003937 |
| -0.578466667 | -0.5224      | -1.1564      | 0.448630621 |
| -1.019433333 | -0.730666667 | -1.156677778 | 0.44854425  |
| -0.0732      | -0.022133333 | -1.157266667 | 0.448361197 |
| -0.4446      | -0.538066667 | -1.158988889 | 0.447826284 |
| -0.713766667 | -0.752133333 | -1.159311111 | 0.447726274 |
| -0.629233333 | -0.609466667 | -1.160666667 | 0.447305789 |
| -0.641066667 | -0.7763      | -1.160944444 | 0.447219672 |
| -0.0069      | 0.008333333  | -1.165244444 | 0.445888704 |
| -0.869666667 | -0.905033333 | -1.165477778 | 0.445816594 |
| -0.732566667 | -0.687833333 | -1.166266667 | 0.445572881 |
| -0.007233333 | 0.0323       | -1.1665      | 0.445500822 |
| -0.630133333 | -0.115866667 | -1.167722222 | 0.445123563 |
| -0.8206      | -0.7004      | -1.171155556 | 0.444065515 |
| -0.523366667 | -0.425533333 | -1.1765      | 0.442423523 |
| -0.513766667 | -0.520966667 | -1.178977778 | 0.441664329 |
| -0.124466667 | -0.289533333 | -1.180744444 | 0.441123815 |
| -0.4999      | -0.4417      | -1.182355556 | 0.440631471 |
| -0.839533333 | -0.845333333 | -1.183388889 | 0.440315981 |
| -0.516666667 | -0.7876      | -1.187988889 | 0.438914279 |
| -0.575933333 | -0.6318      | -1.188044444 | 0.438897378 |
| -0.7606      | -0.892566667 | -1.188355556 | 0.438802742 |
| -0.497566667 | -0.5906      | -1.189566667 | 0.438434531 |
| -0.921166667 | -0.742233333 | -1.190211111 | 0.438238728 |
| -0.644666667 | -0.660366667 | -1.1966      | 0.436302305 |
| -0.465166667 | -0.455833333 | -1.197533333 | 0.436020136 |
| -0.847766667 | -0.8129      | -1.197766667 | 0.435949622 |
| -0.5086      | -0.3774      | -1.197966667 | 0.435889191 |
| -0.521666667 | -0.5987      | -1.200122222 | 0.435238408 |
| -0.701533333 | -0.472666667 | -1.212411111 | 0.431546788 |
| -0.703233333 | -0.6013      | -1.217077778 | 0.430153125 |
| -0.344233333 | -0.371633333 | -1.219744444 | 0.429358767 |
| -0.958666667 | -1.047433333 | -1.2287      | 0.42670177  |
| -0.3613      | -0.147       | -1.231466667 | 0.425884265 |
| -0.635333333 | -0.717066667 | -1.235311111 | 0.424750894 |
| -0.2913      | -0.356366667 | -1.239466667 | 0.423529197 |
| -0.524833333 | -0.055233333 | -1.241966667 | 0.422795912 |
| -0.7244      | -0.6122      | -1.243511111 | 0.42234354  |
| -0.561533333 | -0.591666667 | -1.245744444 | 0.421690246 |



|              |              |              |             |
|--------------|--------------|--------------|-------------|
| -0.9476      | -0.973533333 | -1.252022222 | 0.419859279 |
| -0.061       | -0.128566667 | -1.255711111 | 0.418787094 |
| -0.216066667 | -0.4038      | -1.256077778 | 0.418680671 |
| -0.155933333 | -0.098533333 | -1.262333333 | 0.416869194 |
| -0.4449      | -0.560566667 | -1.262822222 | 0.416727952 |
| -1.0571      | -1.072933333 | -1.264488889 | 0.416246807 |
| -0.5873      | -0.586933333 | -1.264488889 | 0.416246807 |
| -0.802433333 | -0.583666667 | -1.265288889 | 0.416016055 |
| -0.038266667 | -0.0359      | -1.267533333 | 0.415369349 |
| -0.633133333 | -0.651466667 | -1.2699      | 0.414688516 |
| -0.5581      | -0.695766667 | -1.282133333 | 0.411187031 |
| -0.980166667 | -1.006033333 | -1.283277778 | 0.410860978 |
| -0.425833333 | -0.3222      | -1.286155556 | 0.410042241 |
| -0.464333333 | -0.609833333 | -1.287688889 | 0.409606669 |
| -0.458166667 | -0.555733333 | -1.288011111 | 0.409515195 |
| -0.318433333 | -0.1738      | -1.290244444 | 0.408881744 |
| -0.581266667 | -0.7064      | -1.291233333 | 0.408601574 |
| -0.853633333 | -0.747366667 | -1.303011111 | 0.405279439 |
| -0.754566667 | -0.7448      | -1.305511111 | 0.404577751 |
| -0.548033333 | -0.493633333 | -1.305733333 | 0.404515438 |
| -0.598533333 | -0.588266667 | -1.306566667 | 0.404281848 |
| -0.215833333 | -0.1968      | -1.3085      | 0.403740439 |
| -1.167733333 | -1.249833333 | -1.309133333 | 0.403563238 |
| -0.752033333 | -0.621333333 | -1.310066667 | 0.403302243 |
| -0.500566667 | -0.534766667 | -1.3117      | 0.402845906 |
| -0.240966667 | -0.087       | -1.3123      | 0.402678402 |
| -0.487166667 | -0.381066667 | -1.312411111 | 0.402647391 |
| -0.296266667 | -0.2343      | -1.3145      | 0.402064816 |
| -0.4449      | -0.6576      | -1.314911111 | 0.40195026  |
| -0.468033333 | -0.489433333 | -1.315055556 | 0.401910018 |
| -0.581433333 | -0.4644      | -1.315677778 | 0.401736715 |
| -0.9964      | -1.014766667 | -1.319711111 | 0.400615151 |
| -0.535766667 | -0.5348      | -1.320122222 | 0.400501008 |
| -0.513333333 | -0.733733333 | -1.323055556 | 0.399687524 |
| -0.800933333 | -0.861766667 | -1.3231      | 0.399675211 |
| -0.831166667 | -0.7402      | -1.325577778 | 0.398989372 |
| -1.319866667 | -1.284233333 | -1.330688889 | 0.397578352 |
| -0.788433333 | -0.796666667 | -1.330744444 | 0.397563043 |
| -0.5786      | -0.274733333 | -1.332844444 | 0.396984767 |
| -0.760866667 | -0.970733333 | -1.334077778 | 0.396645537 |
| -0.682966667 | -0.621466667 | -1.336433333 | 0.395998444 |
| -0.247066667 | -0.121333333 | -1.338233333 | 0.395504679 |
| -0.416466667 | -0.304933333 | -1.338522222 | 0.39542549  |
| -0.5117      | -0.4604      | -1.340088889 | 0.394996318 |
| 0.102733333  | 0.2883       | -1.340577778 | 0.394862488 |
| -0.9629      | -0.987566667 | -1.340944444 | 0.394762145 |
| -0.6641      | -0.5801      | -1.343055556 | 0.394184907 |

|              |              |              |             |
|--------------|--------------|--------------|-------------|
| -0.765466667 | -0.6575      | -1.345688889 | 0.393466063 |
| -0.552533333 | -0.5289      | -1.350677778 | 0.392107794 |
| -1.075       | -0.878566667 | -1.359622222 | 0.389684317 |
| -0.621       | -0.586166667 | -1.368166667 | 0.387383211 |
| -0.545633333 | -0.532566667 | -1.369477778 | 0.387031319 |
| -0.240833333 | -0.178466667 | -1.3795      | 0.384351978 |
| -0.477933333 | -0.4047      | -1.388744444 | 0.381897017 |
| -0.8005      | -0.852666667 | -1.389366667 | 0.381732343 |
| -0.658833333 | -0.662133333 | -1.389955556 | 0.381576557 |
| -0.6661      | -0.4394      | -1.390588889 | 0.381409084 |
| -0.7713      | -0.8021      | -1.400166667 | 0.378885369 |
| -0.738633333 | -0.785533333 | -1.4006      | 0.378771582 |
| -0.597966667 | -0.608933333 | -1.400966667 | 0.378675328 |
| -0.685       | -0.845966667 | -1.410844444 | 0.376091487 |
| -0.477766667 | -0.478       | -1.414677778 | 0.375093514 |
| -1.194266667 | -1.1858      | -1.420377778 | 0.373614466 |
| -0.4718      | -0.3421      | -1.424088889 | 0.372654636 |
| -0.5126      | -0.5059      | -1.424133333 | 0.372643156 |
| -0.707633333 | -0.7517      | -1.4259      | 0.372187111 |
| -0.696       | -0.7481      | -1.429333333 | 0.371302431 |
| -0.724433333 | -0.587433333 | -1.430166667 | 0.37108802  |
| -0.116633333 | -0.094733333 | -1.439333333 | 0.368737658 |
| -1.367366667 | -1.4125      | -1.4394      | 0.368720619 |
| -0.495166667 | -0.419733333 | -1.442844444 | 0.367841346 |
| -0.946533333 | -0.806566667 | -1.446544444 | 0.366899172 |
| -0.746266667 | -0.828433333 | -1.455744444 | 0.364566917 |
| -0.776766667 | -0.762266667 | -1.4564      | 0.364401297 |
| -0.071366667 | 0.018366667  | -1.467688889 | 0.361561034 |
| -0.8389      | -0.8202      | -1.4683      | 0.361407913 |
| -0.148766667 | -0.0344      | -1.4684      | 0.361382863 |
| -0.6698      | -0.954266667 | -1.474877778 | 0.359763872 |
| -0.099533333 | 0.2287       | -1.483433333 | 0.357636693 |
| -0.872933333 | -0.799       | -1.485511111 | 0.357121993 |
| -0.886633333 | -0.710566667 | -1.488033333 | 0.356498192 |
| -0.7141      | -0.8597      | -1.495088889 | 0.354758981 |
| -0.521133333 | -0.497       | -1.4971      | 0.354264793 |
| -0.9542      | -0.744066667 | -1.5069      | 0.351866483 |
| -1.045366667 | -0.9202      | -1.508722222 | 0.351422332 |
| -1.410466667 | -1.195733333 | -1.509166667 | 0.351314087 |
| -0.7495      | -0.706333333 | -1.5136      | 0.350236173 |
| -0.930633333 | -1.019933333 | -1.518766667 | 0.348984129 |
| -0.822       | -0.9157      | -1.524655556 | 0.347562526 |
| -0.687733333 | -0.625166667 | -1.534555556 | 0.345185662 |
| -0.970766667 | -1.0356      | -1.5425      | 0.343290062 |
| -0.5511      | -0.6339      | -1.546044444 | 0.342447695 |
| -0.800933333 | -0.7984      | -1.546944444 | 0.342234132 |
| -0.8103      | -0.7865      | -1.547666667 | 0.34206285  |

|              |              |              |             |
|--------------|--------------|--------------|-------------|
| -0.910166667 | -0.855233333 | -1.5589      | 0.33940977  |
| -0.684533333 | -0.663133333 | -1.562755556 | 0.33850392  |
| -0.373066667 | -0.4019      | -1.564877778 | 0.338006342 |
| -0.994866667 | -1.019033333 | -1.564888889 | 0.338003739 |
| -0.812566667 | -0.868333333 | -1.584644444 | 0.333406828 |
| -1.235033333 | -0.810833333 | -1.590033333 | 0.332163779 |
| -0.5907      | -0.719366667 | -1.592722222 | 0.33154527  |
| -0.651       | -0.873566667 | -1.596722222 | 0.330627304 |
| -0.711366667 | -0.5989      | -1.610077778 | 0.32758069  |
| -0.9318      | -1.186833333 | -1.611111111 | 0.327346144 |
| -0.665       | -0.647733333 | -1.611166667 | 0.327333539 |
| -0.8501      | -0.819       | -1.616477778 | 0.326130714 |
| -0.928766667 | -0.9022      | -1.619244444 | 0.32550589  |
| -0.2002      | -0.1774      | -1.6243      | 0.324367234 |
| -0.412266667 | -0.511666667 | -1.625344444 | 0.324132493 |
| 0.0083       | 0.032533333  | -1.630522222 | 0.322971278 |
| -0.8566      | -1.054833333 | -1.631988889 | 0.322643107 |
| -0.135866667 | -0.125333333 | -1.640155556 | 0.320821881 |
| -0.478333333 | -0.6067      | -1.642088889 | 0.32039224  |
| -1.207666667 | -1.003433333 | -1.6452      | 0.319702072 |
| -0.9234      | -0.987433333 | -1.653533333 | 0.317860724 |
| -0.608433333 | -0.693466667 | -1.654466667 | 0.317655154 |
| -0.8549      | -0.7545      | -1.6589      | 0.316680513 |
| -1.207233333 | -1.449166667 | -1.6659      | 0.315147692 |
| -0.572933333 | -0.611366667 | -1.668933333 | 0.314485775 |
| -0.6131      | -0.536966667 | -1.672644444 | 0.313677848 |
| -0.6449      | -0.608466667 | -1.672922222 | 0.313617458 |
| -1.038066667 | -1.227833333 | -1.692055556 | 0.309485655 |
| -0.191933333 | -0.2266      | -1.696488889 | 0.30853608  |
| -0.593566667 | -0.5534      | -1.697777778 | 0.30826056  |
| -0.460633333 | -0.510966667 | -1.699733333 | 0.307843    |
| -1.001566667 | -1.0569      | -1.701666667 | 0.30743074  |
| -1.6296      | -1.5506      | -1.705766667 | 0.306558292 |
| -0.9776      | -1.025133333 | -1.706544444 | 0.306393067 |
| -1.0136      | -1.046466667 | -1.708611111 | 0.305954471 |
| -0.567866667 | -0.609666667 | -1.716944444 | 0.304192303 |
| -0.999233333 | -0.9901      | -1.723955556 | 0.302717597 |
| -1.050466667 | -0.901033333 | -1.724555556 | 0.302591726 |
| -0.918466667 | -0.766033333 | -1.742655556 | 0.298819136 |
| -0.6945      | -0.8159      | -1.756422222 | 0.295981268 |
| -1.2363      | -1.116366667 | -1.776566667 | 0.291877182 |
| 0.035066667  | 0.455833333  | -1.776866667 | 0.291816494 |
| -1.8149      | -1.7969      | -1.778622222 | 0.29146161  |
| -0.8775      | -0.9084      | -1.778766667 | 0.29143243  |
| -0.7683      | -0.8284      | -1.7833      | 0.290518109 |
| -0.629366667 | -0.6178      | -1.791022222 | 0.288967226 |
| -0.7288      | -0.629566667 | -1.802055556 | 0.286765713 |

|              |              |              |             |
|--------------|--------------|--------------|-------------|
| -0.691       | -0.8712      | -1.810466667 | 0.285098694 |
| -0.317533333 | -0.241333333 | -1.810711111 | 0.285050392 |
| -0.875866667 | -0.9026      | -1.821522222 | 0.282922296 |
| -0.4952      | -0.564033333 | -1.823844444 | 0.282467258 |
| -0.583       | -0.8914      | -1.830266667 | 0.281212637 |
| -0.8887      | -0.889233333 | -1.832055556 | 0.28086416  |
| -0.991833333 | -1.0532      | -1.836877778 | 0.279926936 |
| -0.8455      | -0.802333333 | -1.846922222 | 0.277984776 |
| -0.8669      | -1.059866667 | -1.848588889 | 0.27766382  |
| -0.877366667 | -1.12        | -1.8521      | 0.276988887 |
| -1.328466667 | -1.2413      | -1.8546      | 0.276509317 |
| -1.012666667 | -0.953066667 | -1.858077778 | 0.275843563 |
| -0.2037      | -0.1748      | -1.862733333 | 0.274954855 |
| -1.043266667 | -0.929433333 | -1.870744444 | 0.273432295 |
| -0.655866667 | -0.722166667 | -1.878744444 | 0.271920261 |
| -0.853933333 | -0.943933333 | -1.8815      | 0.271401387 |
| -1.127233333 | -1.182233333 | -1.883411111 | 0.271042105 |
| -1.402233333 | -1.1563      | -1.884533333 | 0.270831353 |
| -0.2132      | -0.263266667 | -1.893044444 | 0.2692383   |
| -0.7313      | -0.933633333 | -1.893633333 | 0.269128423 |
| -0.783933333 | -0.774433333 | -1.895311111 | 0.268815622 |
| -1.038766667 | -0.894433333 | -1.898966667 | 0.268135349 |
| -0.588833333 | -0.689966667 | -1.914922222 | 0.265186232 |
| -0.135433333 | -0.141933333 | -1.9241      | 0.26350459  |
| 0.0394       | -0.0064      | -1.939311111 | 0.260740915 |
| -1.0738      | -0.997633333 | -1.940511111 | 0.260524127 |
| -1.0171      | -1.177933333 | -1.943422222 | 0.259998964 |
| -0.9014      | -0.829933333 | -1.943877778 | 0.259916877 |
| -0.809766667 | -0.8362      | -1.951933333 | 0.258469628 |
| -0.964233333 | -0.914533333 | -1.960222222 | 0.256988869 |
| -1.037933333 | -1.136766667 | -1.962833333 | 0.256524169 |
| -0.821166667 | -0.713333333 | -1.968933333 | 0.255441824 |
| -1.065433333 | -0.904433333 | -1.970077778 | 0.255239271 |
| -1.594266667 | -1.274066667 | -1.972022222 | 0.254895494 |
| -1.379133333 | -1.509366667 | -1.972155556 | 0.254871938 |
| -0.7007      | -0.710533333 | -1.974522222 | 0.254454177 |
| -1.144433333 | -1.039933333 | -1.975155556 | 0.254342498 |
| -0.5106      | -0.5062      | -1.975677778 | 0.254250448 |
| -0.5968      | -0.587933333 | -1.985577778 | 0.252511714 |
| -0.9828      | -0.968       | -2.002922222 | 0.24949413  |
| -1.219133333 | -1.279933333 | -2.004722222 | 0.249183039 |
| -0.725833333 | -0.686733333 | -2.006455556 | 0.248883837 |
| -0.8571      | -0.844766667 | -2.015666667 | 0.247299861 |
| -0.9783      | -1.105366667 | -2.018966667 | 0.246734837 |
| -0.962633333 | -1.104566667 | -2.020233333 | 0.246518302 |
| -0.647533333 | -0.8359      | -2.028222222 | 0.245156986 |
| -0.925666667 | -0.836566667 | -2.039488889 | 0.243249899 |

|              |              |              |             |
|--------------|--------------|--------------|-------------|
| -0.069033333 | 0.006533333  | -2.064655556 | 0.239043394 |
| -0.919466667 | -0.861833333 | -2.070677778 | 0.238047639 |
| -1.193333333 | -1.075233333 | -2.0878      | 0.235239136 |
| -0.116433333 | -0.227733333 | -2.094511111 | 0.234147394 |
| -1.000633333 | -0.8582      | -2.102588889 | 0.232840046 |
| -0.818533333 | -0.910366667 | -2.109222222 | 0.231771933 |
| -0.153266667 | -0.188166667 | -2.109944444 | 0.231655936 |
| -1.4203      | -1.4816      | -2.120733333 | 0.229930008 |
| -0.844133333 | -0.673533333 | -2.126422222 | 0.229025124 |
| -1.212333333 | -1.2204      | -2.150411111 | 0.22524842  |
| 0.4326       | 0.265133333  | -2.1622      | 0.223415317 |
| -0.828633333 | -0.9101      | -2.180822222 | 0.220550017 |
| -1.056833333 | -1.2223      | -2.194866667 | 0.218413409 |
| -1.441066667 | -1.5674      | -2.197655556 | 0.217991599 |
| -0.921733333 | -0.879366667 | -2.216611111 | 0.215146144 |
| -1.578433333 | -1.539166667 | -2.224544444 | 0.213966309 |
| -0.574066667 | -0.5979      | -2.260322222 | 0.208725356 |
| -1.042066667 | -1.3732      | -2.264744444 | 0.20808654  |
| -0.3491      | -0.372433333 | -2.2656      | 0.207963176 |
| -0.952166667 | -0.9232      | -2.267722222 | 0.207657485 |
| -1.468066667 | -1.431166667 | -2.337222222 | 0.197890982 |
| -0.5077      | -0.079133333 | -2.354244444 | 0.195569806 |
| -0.993166667 | -0.9743      | -2.357777778 | 0.195091418 |
| -1.284866667 | -1.087233333 | -2.370055556 | 0.193438175 |
| -1.260433333 | -1.225333333 | -2.381988889 | 0.19184474  |
| -1.227366667 | -1.074       | -2.383355556 | 0.191663091 |
| -1.602933333 | -1.503233333 | -2.3916      | 0.190570934 |
| -1.5726      | -1.592166667 | -2.429688889 | 0.185605467 |
| 0.0052       | -0.138666667 | -2.432766667 | 0.185209927 |
| -1.800166667 | -1.725666667 | -2.437111111 | 0.184653036 |
| -1.3193      | -1.394466667 | -2.443955556 | 0.183779079 |
| -2.1196      | -2.025266667 | -2.459755556 | 0.181777362 |
| -1.129933333 | -1.0691      | -2.469722222 | 0.180525905 |
| -1.924266667 | -1.954466667 | -2.498055556 | 0.177015113 |
| -1.432966667 | -1.493033333 | -2.510611111 | 0.175481262 |
| -0.862866667 | -1.1818      | -2.526311111 | 0.173581956 |
| -0.8069      | -0.8375      | -2.5488      | 0.170897121 |
| -1.037233333 | -1.224133333 | -2.668466667 | 0.157293759 |
| -1.276466667 | -1.282666667 | -2.672411111 | 0.156864292 |
| -0.6992      | -0.6777      | -2.675677778 | 0.156509509 |
| -0.3653      | -0.370266667 | -2.685588889 | 0.155437996 |
| -1.435       | -1.264133333 | -2.7247      | 0.151280716 |
| -1.067066667 | -1.119466667 | -2.749433333 | 0.148709288 |
| -0.4162      | -0.2953      | -2.762422222 | 0.147376436 |
| -1.613       | -1.630066667 | -2.765622222 | 0.147049907 |
| -1.552633333 | -1.473933333 | -2.824955556 | 0.141124898 |
| -1.114033333 | -0.948233333 | -2.858511111 | 0.137880361 |

|              |              |              |             |             |
|--------------|--------------|--------------|-------------|-------------|
| -1.684833333 | -1.408766667 | -2.875688889 | 0.136248392 |             |
| -1.344       | -1.325633333 | -2.882177778 | 0.135636956 |             |
| -1.350533333 | -1.202       | -2.913166667 | 0.132754561 |             |
| -2.373433333 | -2.543133333 | -2.952822222 | 0.129155213 |             |
| -1.537833333 | -1.549366667 | -2.973088889 | 0.127353553 |             |
| -1.906       | -1.805066667 | -3.003988889 | 0.124654866 |             |
| -1.224066667 | -1.082033333 | -3.010255556 | 0.124114575 |             |
| -1.217033333 | -0.9873      | -3.0135      | 0.12383577  |             |
| -2.2098      | -2.265433333 | -3.045944444 | 0.121081936 |             |
| -1.470566667 | -1.570666667 | -3.055666667 | 0.120268717 |             |
| -1.339766667 | -1.016233333 | -3.059977778 | 0.119909862 |             |
| -1.357       | -1.4728      | -3.062433333 | 0.119705942 |             |
| -1.200366667 | -1.057733333 | -3.075811111 | 0.118601067 |             |
| -1.540133333 | -1.560833333 | -3.166966667 | 0.111339185 |             |
| -0.8612      | -0.903233333 | -3.259611111 | 0.104414132 |             |
| -0.597666667 | -0.538233333 | -3.276977778 | 0.103164765 |             |
| -1.677766667 | -1.847566667 | -3.325266667 | 0.099768855 |             |
| -1.8343      | -1.9373      | -3.344611111 | 0.098440029 |             |
| -0.821066667 | -0.832166667 | -3.391655556 | 0.095281798 |             |
| -1.6499      | -1.569633333 | -3.4528      | 0.091327934 |             |
| -1.963933333 | -1.842633333 | -3.588977778 | 0.083101724 |             |
| -1.973066667 | -1.9428      | -3.644466667 | 0.079966155 |             |
| -1.985366667 | -1.983333333 | -3.658166667 | 0.079210381 |             |
| -1.768366667 | -1.835866667 | -3.994844444 | 0.062723747 |             |
| -2.0604      | -1.965833333 | -4.072122222 | 0.059452355 |             |
| -1.9998      | -1.954366667 | -4.484933333 | 0.04465813  |             |
| -2.255933333 | -2.239166667 | -4.492788889 | 0.044415625 |             |
| -2.488433333 | -2.524166667 | -4.929266667 | 0.032820325 |             |
| -2.830766667 | -2.776666667 | -5.833333333 | 0.01753847  | 57.01751796 |

|              |             |
|--------------|-------------|
| >2-fold up   | 0.034253169 |
| >2-fold down | 0.029520295 |

**Table S4**

| Tumor        | EGFR     | MITF     |
|--------------|----------|----------|
| TCGA-BF-A1PU | 20.7792  | 8513.961 |
| TCGA-BF-A1PV | 17.0353  | 5533.772 |
| TCGA-BF-A1PX | 686.8266 | 2111.922 |
| TCGA-BF-A1PZ | 14.0555  | 5998.014 |
| TCGA-BF-A1Q0 | 284.788  | 468.8969 |
| TCGA-BF-A3DJ | 59.2797  | 1882.819 |
| TCGA-BF-A3DL | 7.3511   | 4252.879 |
| TCGA-BF-A3DM | 75.2659  | 4191.864 |
| TCGA-BF-A3DN | 51.033   | 8093.947 |
| TCGA-BF-A5EO | 62.4355  | 1899.381 |
| TCGA-BF-A5EP | 2.1932   | 3806.119 |
| TCGA-BF-A5EQ | 29.2992  | 4897.343 |
| TCGA-BF-A5ER | 6.1641   | 3515.603 |
| TCGA-BF-A5ES | 41.6185  | 10304.05 |
| TCGA-D3-A1Q1 | 70.2006  | 10013.97 |
| TCGA-D3-A1Q3 | 197.4739 | 5829.544 |
| TCGA-D3-A1Q4 | 725.8289 | 2690.956 |
| TCGA-D3-A1Q5 | 647.6242 | 840.0914 |
| TCGA-D3-A1Q6 | 10.5893  | 158.8398 |
| TCGA-D3-A1Q7 | 178.2105 | 8041.953 |
| TCGA-D3-A1Q8 | 106.5129 | 887.0421 |
| TCGA-D3-A1Q9 | 11.5321  | 15041.85 |
| TCGA-D3-A1QA | 9.204    | 6342.04  |
| TCGA-D3-A1QB | 15.2541  | 9006.148 |
| TCGA-D3-A2J6 | 98.2084  | 10943.93 |
| TCGA-D3-A2J7 | 14.2657  | 3447.714 |
| TCGA-D3-A2J8 | 377.0653 | 100.1451 |
| TCGA-D3-A2J9 | 42.5772  | 2805.038 |
| TCGA-D3-A2JA | 59.9099  | 453.6036 |
| TCGA-D3-A2JB | 34.0966  | 5362.861 |
| TCGA-D3-A2JC | 14.5337  | 12716.59 |
| TCGA-D3-A2JD | 29.9335  | 4818.182 |
| TCGA-D3-A2JF | 9.6251   | 651.9757 |
| TCGA-D3-A2JG | 8.6336   | 8194.069 |
| TCGA-D3-A2JH | 5.0438   | 9077.882 |
| TCGA-D3-A2JK | 65.8915  | 1573.643 |
| TCGA-D3-A2JL | 2.3821   | 10344.42 |
| TCGA-D3-A2JN | 21.8103  | 178.2988 |
| TCGA-D3-A2JO | 8.52     | 6025.413 |
| TCGA-D3-A2JP | 8.4559   | 4680.882 |
| TCGA-D3-A3BZ | 204.0859 | 5018.355 |
| TCGA-D3-A3C1 | 8.871    | 697.5806 |
| TCGA-D3-A3C3 | 5.9759   | 5778.715 |
| TCGA-D3-A3C6 | 18.4145  | 5490.637 |
| TCGA-D3-A3C7 | 21.9595  | 294.3412 |



|              |          |          |
|--------------|----------|----------|
| TCGA-D3-A3C8 | 389.8777 | 401.9857 |
| TCGA-D3-A3CB | 210.2813 | 4357.563 |
| TCGA-D3-A3CC | 55.3889  | 15931.07 |
| TCGA-D3-A3CE | 54.6203  | 7588.103 |
| TCGA-D3-A3CF | 28.0061  | 6971.385 |
| TCGA-D3-A3ML | 214.3661 | 8277.115 |
| TCGA-D3-A3MO | 93.8999  | 3797.121 |
| TCGA-D3-A3MR | 10.1805  | 3852.383 |
| TCGA-D3-A3MU | 32.8453  | 5982.984 |
| TCGA-D3-A3MV | 24.4114  | 3361.355 |
| TCGA-D3-A51E | 3.866    | 10812.71 |
| TCGA-D3-A51F | 34.515   | 1745.712 |
| TCGA-D3-A51G | 10.8774  | 737.4909 |
| TCGA-D3-A51H | 31.2388  | 3697.318 |
| TCGA-D3-A51J | 14.9084  | 4189.639 |
| TCGA-D3-A51K | 38.162   | 3409.657 |
| TCGA-D3-A51N | 5.6497   | 1565.6   |
| TCGA-D3-A51R | 24.4171  | 312.5846 |
| TCGA-D3-A51T | 4.5113   | 9588.471 |
| TCGA-D3-A5GL | 2.0352   | 9466.979 |
| TCGA-D3-A5GN | 11.1513  | 1624.543 |
| TCGA-D3-A5GO | 1.7701   | 2611.793 |
| TCGA-D3-A5GR | 56.2822  | 1609.195 |
| TCGA-D3-A5GS | 10.4738  | 5332.17  |
| TCGA-D3-A5GT | 4.4676   | 8727.476 |
| TCGA-D3-A5GU | 37.9088  | 3964.181 |
| TCGA-D9-A148 | 9.9451   | 12961.57 |
| TCGA-D9-A149 | 22.5644  | 9753.385 |
| TCGA-D9-A1JW | 28.9809  | 7009.332 |
| TCGA-D9-A1JX | 7.9038   | 7629.21  |
| TCGA-D9-A1X3 | 15.2434  | 9489.48  |
| TCGA-D9-A3Z1 | 16.7319  | 14761.3  |
| TCGA-D9-A3Z3 | 26.6547  | 6088.789 |
| TCGA-D9-A3Z4 | 37.4517  | 5744.788 |
| TCGA-D9-A4Z2 | 44.622   | 5669.331 |
| TCGA-D9-A4Z3 | 2.1478   | 4308.941 |
| TCGA-D9-A4Z5 | 20.0178  | 4936.388 |
| TCGA-D9-A4Z6 | 11.4885  | 15107.39 |
| TCGA-D9-A6E9 | 7.7203   | 7356.948 |
| TCGA-D9-A6EA | 11.4433  | 3459.579 |
| TCGA-D9-A6EC | 12.2213  | 9440.596 |
| TCGA-D9-A6EG | 19.4647  | 15161.54 |
| TCGA-DA-A1HV | 164.3583 | 5219.76  |
| TCGA-DA-A1HW | 13.6918  | 15125.72 |
| TCGA-DA-A1HY | 48.4231  | 370.4991 |
| TCGA-DA-A1I0 | 14.0899  | 2004.189 |
| TCGA-DA-A1I1 | 31.0335  | 7138.977 |

|              |          |          |
|--------------|----------|----------|
| TCGA-DA-A1I2 | 11.454   | 2952.782 |
| TCGA-DA-A1I4 | 120.7835 | 7768.952 |
| TCGA-DA-A1I5 | 19.5084  | 5241.124 |
| TCGA-DA-A1I7 | 26.3248  | 1367.521 |
| TCGA-DA-A1I8 | 29.1857  | 281.9219 |
| TCGA-DA-A1IA | 195.8842 | 3548.806 |
| TCGA-DA-A1IB | 548.5504 | 4343.948 |
| TCGA-DA-A1IC | 39.3101  | 8137.585 |
| TCGA-DA-A3F2 | 128.5141 | 405.6225 |
| TCGA-DA-A3F3 | 4.9048   | 7682.92  |
| TCGA-DA-A3F5 | 156.6377 | 106.8038 |
| TCGA-DA-A3F8 | 32.1027  | 2894.703 |
| TCGA-EB-A1NK | 104.2293 | 4474.377 |
| TCGA-EB-A24C | 88.1095  | 18395.21 |
| TCGA-EB-A24D | 25.1334  | 9794.457 |
| TCGA-EB-A299 | 450.2066 | 1949.429 |
| TCGA-EB-A3HV | 549.2891 | 1734.135 |
| TCGA-EB-A3XB | 10.4936  | 9687.136 |
| TCGA-EB-A3XC | 109.2868 | 5328.887 |
| TCGA-EB-A3XD | 1156.25  | 3150     |
| TCGA-EB-A3XE | 159.1387 | 5442.752 |
| TCGA-EB-A3XF | 144.9807 | 12454.9  |
| TCGA-EB-A3Y6 | 14.5414  | 8155.481 |
| TCGA-EB-A3Y7 | 5.5281   | 1946.997 |
| TCGA-EB-A41A | 12.1352  | 7056.053 |
| TCGA-EB-A41B | 96.347   | 4718.869 |
| TCGA-EB-A42Y | 577.9266 | 2511.092 |
| TCGA-EB-A42Z | 10.3326  | 5859.542 |
| TCGA-EB-A430 | 3.2154   | 11248.87 |
| TCGA-EB-A431 | 9.1344   | 14707.7  |
| TCGA-EB-A44N | 562.7437 | 3680.677 |
| TCGA-EB-A44O | 21.5475  | 9095.023 |
| TCGA-EB-A44P | 8.2645   | 7159.2   |
| TCGA-EB-A44Q | 603.9693 | 9379.589 |
| TCGA-EB-A44R | 22.1519  | 6611.155 |
| TCGA-EB-A4IQ | 512.8744 | 5703.416 |
| TCGA-EB-A4IS | 50.899   | 6376.912 |
| TCGA-EB-A4OY | 62.3372  | 3972.019 |
| TCGA-EB-A4OZ | 157.4318 | 732.6297 |
| TCGA-EB-A4P0 | 9.6688   | 4775.925 |
| TCGA-EB-A4XL | 243.3669 | 6436.414 |
| TCGA-EB-A51B | 105.2427 | 8961.165 |
| TCGA-EB-A550 | 786.7155 | 2943.387 |
| TCGA-EB-A551 | 5.4127   | 5368.516 |
| TCGA-EB-A553 | 14.8368  | 4662.71  |
| TCGA-EB-A57M | 517.9384 | 3453.259 |
| TCGA-EB-A5FP | 15.6198  | 9053.174 |

|              |          |          |
|--------------|----------|----------|
| TCGA-EB-A5KH | 9.1232   | 3293.685 |
| TCGA-EB-A5SE | 57.8694  | 7481.787 |
| TCGA-EB-A5SF | 374.9726 | 2159.713 |
| TCGA-EB-A5SG | 10.0158  | 3609.91  |
| TCGA-EB-A5SH | 9.8039   | 6245.098 |
| TCGA-EB-A5UL | 4.5802   | 8172.137 |
| TCGA-EB-A5UM | 54.3689  | 5331.392 |
| TCGA-EB-A5UN | 90.9091  | 8250.998 |
| TCGA-EB-A5VU | 101.1777 | 6761.37  |
| TCGA-EB-A5VV | 56.6672  | 98.1452  |
| TCGA-EB-A6L9 | 27.8676  | 2850.048 |
| TCGA-EB-A6QY | 337.7564 | 7368.242 |
| TCGA-EB-A6QZ | 86.0732  | 4246.86  |
| TCGA-EB-A6R0 | 2.9547   | 10881.16 |
| TCGA-EE-A17X | 7.6197   | 11691.58 |
| TCGA-EE-A17Y | 34.4734  | 2473.011 |
| TCGA-EE-A17Z | 181.6828 | 8476.173 |
| TCGA-EE-A180 | 14.5455  | 11940.61 |
| TCGA-EE-A181 | 170.0337 | 5103.704 |
| TCGA-EE-A182 | 102.5163 | 2440.354 |
| TCGA-EE-A183 | 35.5987  | 5143.474 |
| TCGA-EE-A184 | 3.3645   | 11561.5  |
| TCGA-EE-A185 | 148.6188 | 9915.47  |
| TCGA-EE-A20B | 18.0378  | 3896.612 |
| TCGA-EE-A20C | 0.3311   | 3139.735 |
| TCGA-EE-A20F | 10.6298  | 7255.793 |
| TCGA-EE-A20H | 146.4306 | 168.7471 |
| TCGA-EE-A20I | 16.5472  | 7836.459 |
| TCGA-EE-A29A | 44.2036  | 656.2533 |
| TCGA-EE-A29B | 3.8995   | 5766.465 |
| TCGA-EE-A29C | 62.4933  | 8266.808 |
| TCGA-EE-A29D | 55.1147  | 8250.254 |
| TCGA-EE-A29E | 2.8523   | 9729.892 |
| TCGA-EE-A29G | 1876.626 | 1591.313 |
| TCGA-EE-A29H | 33.5817  | 8609.449 |
| TCGA-EE-A29L | 9.8743   | 9280.392 |
| TCGA-EE-A29M | 5.1003   | 26726.62 |
| TCGA-EE-A29N | 50.4317  | 5731.122 |
| TCGA-EE-A29P | 12.2873  | 4793.006 |
| TCGA-EE-A29Q | 3.2542   | 5567.906 |
| TCGA-EE-A29R | 28.3871  | 2959.032 |
| TCGA-EE-A29S | 21.7457  | 3510.42  |
| TCGA-EE-A29T | 151.6438 | 2399.943 |
| TCGA-EE-A29V | 58.0996  | 6599.886 |
| TCGA-EE-A29W | 119.7842 | 172.6619 |
| TCGA-EE-A29X | 13.2597  | 3929.282 |
| TCGA-EE-A2A0 | 278.094  | 6051.065 |

|              |          |          |
|--------------|----------|----------|
| TCGA-EE-A2A1 | 100.1544 | 7695.546 |
| TCGA-EE-A2A2 | 5.2969   | 11252.02 |
| TCGA-EE-A2A5 | 131.6102 | 7592.395 |
| TCGA-EE-A2A6 | 197.4035 | 7139.814 |
| TCGA-EE-A2GB | 34.0703  | 12294.36 |
| TCGA-EE-A2GC | 41.2186  | 10792.11 |
| TCGA-EE-A2GD | 30.7439  | 865.4406 |
| TCGA-EE-A2GE | 167.9667 | 2319.619 |
| TCGA-EE-A2GH | 12.8563  | 4193.963 |
| TCGA-EE-A2GI | 5.6281   | 4721.332 |
| TCGA-EE-A2GJ | 70.7784  | 1062.016 |
| TCGA-EE-A2GK | 152.8662 | 447.983  |
| TCGA-EE-A2GL | 168.0456 | 3122.397 |
| TCGA-EE-A2GM | 6.7793   | 9326.644 |
| TCGA-EE-A2GN | 51.212   | 10552.54 |
| TCGA-EE-A2GO | 34.3018  | 601.7594 |
| TCGA-EE-A2GP | 64.3777  | 5562.232 |
| TCGA-EE-A2GR | 13.3681  | 11168.67 |
| TCGA-EE-A2GS | 64.0742  | 6950.742 |
| TCGA-EE-A2GT | 28.6686  | 2648.202 |
| TCGA-EE-A2GU | 86.3749  | 8093.254 |
| TCGA-EE-A2M5 | 1229.156 | 97.6631  |
| TCGA-EE-A2M6 | 4.9433   | 5213.767 |
| TCGA-EE-A2M7 | 19.4665  | 1357.606 |
| TCGA-EE-A2M8 | 40.9813  | 6146.818 |
| TCGA-EE-A2MC | 812.7762 | 235.0342 |
| TCGA-EE-A2MD | 16.4032  | 15655.83 |
| TCGA-EE-A2ME | 148.8223 | 3578.694 |
| TCGA-EE-A2MF | 14.7351  | 9479.456 |
| TCGA-EE-A2MG | 99.0985  | 5022.552 |
| TCGA-EE-A2MH | 29.0326  | 4095.884 |
| TCGA-EE-A2MI | 31.3082  | 486.9176 |
| TCGA-EE-A2MJ | 27.9951  | 7234.665 |
| TCGA-EE-A2MK | 5.9547   | 5856.689 |
| TCGA-EE-A2ML | 12.4916  | 6265.405 |
| TCGA-EE-A2MM | 67.8417  | 924.68   |
| TCGA-EE-A2MN | 14.469   | 8630.437 |
| TCGA-EE-A2MP | 6.1786   | 3597.158 |
| TCGA-EE-A2MQ | 25.7821  | 4232.726 |
| TCGA-EE-A2MR | 749.4318 | 253.9773 |
| TCGA-EE-A2MS | 49.3111  | 5823.785 |
| TCGA-EE-A2MT | 43.4631  | 4557.595 |
| TCGA-EE-A2MU | 13.6764  | 5369.348 |
| TCGA-EE-A3AA | 89.5542  | 3655.608 |
| TCGA-EE-A3AB | 18.7533  | 346.9359 |
| TCGA-EE-A3AC | 4.2838   | 7369.562 |
| TCGA-EE-A3AD | 114.3829 | 9706.16  |

|              |          |          |
|--------------|----------|----------|
| TCGA-EE-A3AE | 5.9769   | 14869.79 |
| TCGA-EE-A3AF | 9.245    | 8515.794 |
| TCGA-EE-A3AG | 4.2974   | 422.0026 |
| TCGA-EE-A3AH | 21.7842  | 6911.406 |
| TCGA-EE-A3J3 | 80.1539  | 7551.459 |
| TCGA-EE-A3J4 | 6.5113   | 9620.288 |
| TCGA-EE-A3J5 | 11.9262  | 10860.99 |
| TCGA-EE-A3J7 | 123.1386 | 4571.87  |
| TCGA-EE-A3J8 | 6.8485   | 3402.732 |
| TCGA-EE-A3JA | 13.1827  | 16516.01 |
| TCGA-EE-A3JB | 104.879  | 329.6626 |
| TCGA-EE-A3JD | 109.538  | 529.8063 |
| TCGA-EE-A3JE | 115.5914 | 3407.706 |
| TCGA-EE-A3JH | 49.7379  | 4386.688 |
| TCGA-EE-A3JI | 8.2294   | 7900.249 |
| TCGA-ER-A193 | 104.7347 | 6571.716 |
| TCGA-ER-A194 | 1.826    | 3048.798 |
| TCGA-ER-A195 | 279.611  | 1076.763 |
| TCGA-ER-A196 | 1225.79  | 5495.693 |
| TCGA-ER-A197 | 248.4884 | 9606.788 |
| TCGA-ER-A198 | 11.546   | 9819.488 |
| TCGA-ER-A199 | 19.2215  | 4056.223 |
| TCGA-ER-A19A | 407.2919 | 670.4096 |
| TCGA-ER-A19B | 277.7358 | 2522.538 |
| TCGA-ER-A19C | 30.4823  | 12464.05 |
| TCGA-ER-A19D | 430.5848 | 297.1022 |
| TCGA-ER-A19E | 150.4777 | 901.2739 |
| TCGA-ER-A19F | 5.8939   | 9154.42  |
| TCGA-ER-A19G | 13.1059  | 9072.194 |
| TCGA-ER-A19H | 46.2797  | 6128.865 |
| TCGA-ER-A19J | 159.2942 | 13618.05 |
| TCGA-ER-A19K | 107.567  | 15300.98 |
| TCGA-ER-A19L | 168.7764 | 5641.819 |
| TCGA-ER-A19M | 19.4102  | 7217.245 |
| TCGA-ER-A19N | 223.7612 | 3139.727 |
| TCGA-ER-A19O | 37.6395  | 1897.567 |
| TCGA-ER-A19P | 56.9559  | 4376.758 |
| TCGA-ER-A19Q | 20.357   | 5795.49  |
| TCGA-ER-A19S | 15.8014  | 4797.968 |
| TCGA-ER-A19T | 16.4826  | 1850.809 |
| TCGA-ER-A19W | 25.9711  | 7499.467 |
| TCGA-ER-A1A1 | 98.1097  | 2571.597 |
| TCGA-ER-A2NB | NaN      | NaN      |
| TCGA-ER-A2NC | 654.5685 | 145.0996 |
| TCGA-ER-A2ND | 37.5324  | 6994.823 |
| TCGA-ER-A2NE | 24.2008  | 13018.52 |
| TCGA-ER-A2NF | 3.012    | 15109.19 |

|              |          |          |
|--------------|----------|----------|
| TCGA-ER-A2NG | 107.1637 | 12972.04 |
| TCGA-ER-A2NH | 163.2766 | 3661.702 |
| TCGA-ER-A3ES | 5.4004   | 12625.31 |
| TCGA-ER-A3ET | 58.0009  | 5771.587 |
| TCGA-ER-A3EV | 258.248  | 17150.17 |
| TCGA-ER-A3PL | 26.4556  | 5525.751 |
| TCGA-ER-A42H | 117.3521 | 10314.36 |
| TCGA-ER-A42K | 519.6116 | 1195.799 |
| TCGA-ER-A42L | 216.5522 | 1614.982 |
| TCGA-FR-A2OS | 41.8939  | 9736.81  |
| TCGA-FR-A3R1 | 6.3249   | 6468.043 |
| TCGA-FR-A3YN | 46.8403  | 11799.83 |
| TCGA-FR-A3YO | 6.015    | 2452.13  |
| TCGA-FR-A44A | 11.2782  | 4142.544 |
| TCGA-FR-A69P | 44.0391  | 11535.14 |
| TCGA-FR-A726 | 19.5929  | 5497.946 |
| TCGA-FR-A728 | 11.9149  | 3268.085 |
| TCGA-FS-A1YW | 24.6629  | 9947.715 |
| TCGA-FS-A1YX | 35.6099  | 5477.013 |
| TCGA-FS-A1YY | 43.5786  | 4729.813 |
| TCGA-FS-A1Z0 | 17.4658  | 7069.863 |
| TCGA-FS-A1Z3 | 19.085   | 5955.936 |
| TCGA-FS-A1Z4 | 89.8973  | 3362.102 |
| TCGA-FS-A1Z7 | 187.1566 | 6079.327 |
| TCGA-FS-A1ZA | 105.237  | 852.9897 |
| TCGA-FS-A1ZB | 505.9473 | 3214.802 |
| TCGA-FS-A1ZC | 11.4561  | 650.5879 |
| TCGA-FS-A1ZD | 72.6592  | 347.9456 |
| TCGA-FS-A1ZE | 66.3539  | 9415.885 |
| TCGA-FS-A1ZF | 28.8431  | 4871.315 |
| TCGA-FS-A1ZG | 11.206   | 12041    |
| TCGA-FS-A1ZH | 63.7387  | 296.1788 |
| TCGA-FS-A1ZJ | 71.557   | 8214.72  |
| TCGA-FS-A1ZK | 31.0068  | 7904.675 |
| TCGA-FS-A1ZM | 213.8222 | 4169.371 |
| TCGA-FS-A1ZN | 119.2633 | 9551.932 |
| TCGA-FS-A1ZP | 52.1954  | 13805.51 |
| TCGA-FS-A1ZQ | 212.1921 | 4433.059 |
| TCGA-FS-A1ZR | 365.3654 | 9311.914 |
| TCGA-FS-A1ZS | 1175.598 | 301.0866 |
| TCGA-FS-A1ZT | 26.8618  | 12398.45 |
| TCGA-FS-A1ZU | 8.1004   | 5821.385 |
| TCGA-FS-A1ZW | 7.0729   | 6674.102 |
| TCGA-FS-A1ZY | 12.2188  | 6815.885 |
| TCGA-FS-A1ZZ | 120.8169 | 7937.62  |
| TCGA-FS-A4F0 | 9.9838   | 4639.26  |
| TCGA-FS-A4F2 | 7.3407   | 4109.776 |

|              |          |          |
|--------------|----------|----------|
| TCGA-FS-A4F4 | 27.5862  | 5071.035 |
| TCGA-FS-A4F5 | 10.3164  | 4634.473 |
| TCGA-FS-A4F8 | 87.3957  | 2653.976 |
| TCGA-FS-A4F9 | 7.2923   | 9654.577 |
| TCGA-FS-A4FB | 7.7288   | 6258.682 |
| TCGA-FS-A4FC | 165.2259 | 3683.304 |
| TCGA-FS-A4FD | 45.1189  | 7771.944 |
| TCGA-FW-A3I3 | 104.5891 | 15962.29 |
| TCGA-FW-A3R5 | 25.6237  | 18574.51 |
| TCGA-FW-A3TU | 189.1437 | 6225.159 |
| TCGA-FW-A3TV | 52.5063  | 12931.24 |
| TCGA-FW-A5DX | 5.1494   | 7394.207 |
| TCGA-FW-A5DY | 121.6029 | 1584.523 |
| TCGA-GF-A2C7 | 278.0766 | 12856.69 |
| TCGA-GF-A3OT | 582.2794 | 67.0206  |
| TCGA-GF-A4EO | 15.8665  | 6666.667 |
| TCGA-GF-A6C8 | 11.5274  | 4275.067 |
| TCGA-GF-A6C9 | 48.0072  | 333.3333 |
| TCGA-GF-A769 | 9.1542   | 6601.977 |
| TCGA-GN-A261 | NaN      | NaN      |
| TCGA-GN-A262 | 0        | 7208.447 |
| TCGA-GN-A263 | 14.4973  | 20589.35 |
| TCGA-GN-A264 | 25.5146  | 15266.45 |
| TCGA-GN-A265 | 49.7717  | 3170.352 |
| TCGA-GN-A266 | 78.0911  | 1100.68  |
| TCGA-GN-A267 | 50.217   | 5283.943 |
| TCGA-GN-A268 | 4.0955   | 8925.566 |
| TCGA-GN-A269 | NaN      | NaN      |
| TCGA-GN-A26A | 11.0259  | 1001.438 |
| TCGA-GN-A26C | 104.3566 | 106.383  |
| TCGA-GN-A26D | 12.4805  | 10824.46 |
| TCGA-GN-A4U3 | 1.2111   | 7623.738 |
| TCGA-GN-A4U4 | 9.16     | 8347.183 |
| TCGA-GN-A4U5 | 225.7491 | 4700.371 |
| TCGA-GN-A4U7 | 9.1153   | 8062.45  |
| TCGA-GN-A4U8 | 2.8112   | 7823.293 |
| TCGA-GN-A4U9 | 1615.862 | 183.7781 |
| TCGA-HR-A2OG | 50.916   | 2899.114 |
| TCGA-HR-A2OH | 14.0515  | 4321.233 |
| TCGA-HR-A5NC | 103.4577 | 7992.394 |
| TCGA-IH-A3EA | 4.9963   | 2361.229 |
| TCGA-OD-A75X | 20.5807  | 7404.058 |
| TCGA-QB-A6FS | 5.7504   | 2116.734 |
| TCGA-RP-A690 | 21.6963  | 13492.6  |
| TCGA-RP-A693 | 14.3954  | 3571.017 |
| TCGA-RP-A694 | 6.5988   | 8050.847 |
| TCGA-RP-A695 | 1.712    | 8343.641 |

| Gene Symbol                      | EGFR      | EGFR       | EGFR      | EGFR      | EGFR      |
|----------------------------------|-----------|------------|-----------|-----------|-----------|
| Probes                           | 201983_s  | 210984_x_a | 201984_s  | 211607_x  | 211550_at |
| Gene Symbol                      | EGFR      | EGFR       | EGFR      | EGFR      | EGFR      |
| UniGene ID                       | Hs.488293 | Hs.488293  | Hs.488293 | Hs.488293 | Hs.488293 |
| Metastatic Melanoma_Sample 15.3  | 5.20492   | 6.1038502  | 4.526132  | 3.884467  | 3.146325  |
| Metastatic Melanoma_Sample 18.2  | 6.261481  | 6.0171361  | 5.618164  | 4.106506  | 3.583393  |
| Metastatic Melanoma_Sample 18.4  | 6.291137  | 6.0526821  | 6.602698  | 3.964391  | 3.661264  |
| Metastatic Melanoma_Sample 64.1  | 5.979509  | 6.245291   | 5.647878  | 4.616187  | 3.614778  |
| Metastatic Melanoma_Sample 64.2  | 5.77068   | 5.5833261  | 4.216442  | 4.63798   | 3.005055  |
| Metastatic Melanoma_Sample 64.3  | 4.455504  | 6.3350347  | 3.827897  | 3.0773    | 3.033874  |
| Metastatic Melanoma_Sample 64.4  | 5.670274  | 6.5100782  | 6.355343  | 4.986751  | 3.93      |
| Metastatic Melanoma_Sample 64.5  | 7.988296  | 6.5830707  | 6.922792  | 4.843975  | 3.134388  |
| Metastatic Melanoma_Sample 65.2  | 5.083822  | 6.1662149  | 4.184484  | 4.969053  | 3.923872  |
| Metastatic Melanoma_Sample 65.3  | 4.91438   | 5.2837484  | 3.534989  | 2.494828  | 3.082312  |
| Metastatic Melanoma_Sample 65.4  | 5.155849  | 6.464014   | 6.33139   | 5.061521  | 3.435188  |
| Metastatic Melanoma_Sample 66.1  | 6.741041  | 6.6145307  | 5.571943  | 5.129539  | 3.809316  |
| Metastatic Melanoma_Sample 66.2  | 4.607282  | 6.2969246  | 5.475054  | 4.124207  | 3.035273  |
| Metastatic Melanoma_Sample 66.4  | 5.16776   | 6.2606876  | 4.235949  | 4.480592  | 3.358092  |
| Metastatic Melanoma_Sample 66.5  | 5.199792  | 6.8312154  | 6.767629  | 5.0045    | 4.304133  |
| Metastatic Melanoma_Sample 66.6  | 5.422103  | 5.7997677  | 4.908608  | 4.780035  | 3.277539  |
| Metastatic Melanoma_Sample 67.3  | 4.563702  | 6.4396294  | 5.714523  | 4.079062  | 3.782863  |
| Metastatic Melanoma_Sample 67.4  | 5.584468  | 6.318013   | 5.858731  | 3.95851   | 3.655246  |
| Metastatic Melanoma_Sample 67.5  | 5.607363  | 6.3031642  | 6.131327  | 4.562906  | 4.026484  |
| Metastatic Melanoma_Sample 67.6  | 4.350686  | 5.8484944  | 3.658684  | 4.260113  | 2.979137  |
| Metastatic Melanoma_Sample 68.2  | 5.891924  | 5.696314   | 6.456076  | 3.248226  | 3.292964  |
| Metastatic Melanoma_Sample 68.4  | 7.145585  | 5.3849666  | 5.457416  | 3.904624  | 3.350803  |
| Metastatic Melanoma_Sample 68.6  | 4.317105  | 6.4558319  | 4.428703  | 2.551821  | 3.137762  |
| Metastatic Melanoma_Sample 69.1  | 5.028851  | 6.5186387  | 6.111813  | 4.223057  | 3.27691   |
| Metastatic Melanoma_Sample 69.2  | 6.000511  | 6.1051108  | 5.398756  | 4.205853  | 3.4998    |
| Metastatic Melanoma_Sample 69.3  | 5.313151  | 5.6539045  | 3.891845  | 2.855661  | 3.466215  |
| Metastatic Melanoma_Sample 69.4  | 5.463802  | 5.9440569  | 5.903225  | 4.552466  | 3.419913  |
| Metastatic Melanoma_Sample 69.5  | 5.963055  | 5.9438449  | 6.316629  | 2.302655  | 3.87081   |
| Metastatic Melanoma_Sample 69.6  | 5.23921   | 6.2835576  | 4.803576  | 4.778481  | 3.378331  |
| Metastatic Melanoma_Sample 88.5  | 5.421098  | 5.532914   | 6.054003  | 4.238453  | 3.311156  |
| Metastatic Melanoma_Sample 89.1  | 5.533536  | 5.8891933  | 4.114452  | 4.181872  | 3.761319  |
| Metastatic Melanoma_Sample 89.3  | 5.129536  | 5.9256817  | 5.450683  | 3.601678  | 4.416378  |
| Metastatic Melanoma_Sample 91.1  | 5.486953  | 5.3269776  | 5.329017  | 3.288771  | 3.350974  |
| Metastatic Melanoma_Sample 91.2  | 5.135734  | 6.0783789  | 4.848093  | 4.368564  | 3.541217  |
| Metastatic Melanoma_Sample 92.3  | 5.67183   | 6.3973283  | 4.481625  | 4.479272  | 3.426066  |
| Metastatic Melanoma_Sample 92.5  | 8.88958   | 6.1933213  | 7.017633  | 4.62771   | 2.989289  |
| Metastatic Melanoma_Sample 92.6  | 5.652867  | 5.5169326  | 5.305506  | 4.448     | 3.095108  |
| Metastatic Melanoma_Sample 99.2  | 5.707074  | 6.1660801  | 3.943431  | 4.491643  | 3.382769  |
| Metastatic Melanoma_Sample 99.3  | 4.770586  | 6.2093327  | 4.915785  | 4.79046   | 3.229933  |
| Metastatic Melanoma_Sample 99.4  | 5.538705  | 6.5290182  | 4.910759  | 4.346204  | 3.897381  |
| Metastatic Melanoma_Sample 99.6  | 5.455588  | 5.8627483  | 4.784079  | 4.147153  | 3.643669  |
| Metastatic Melanoma_Sample 101.6 | 5.591158  | 5.2034352  | 5.106271  | 4.099309  | 3.282257  |



|                                  |          |           |          |          |          |
|----------------------------------|----------|-----------|----------|----------|----------|
| Metastatic Melanoma_Sample 102.2 | 5.498099 | 6.5887997 | 5.098095 | 4.880053 | 3.068856 |
| Metastatic Melanoma_Sample 104.2 | 6.341816 | 5.5959112 | 4.425854 | 2.877088 | 3.723299 |
| Metastatic Melanoma_Sample 104.3 | 4.430256 | 5.7130054 | 4.738085 | 4.256957 | 3.380569 |
| Metastatic Melanoma_Sample 104.4 | 7.858172 | 5.9882328 | 5.805271 | 4.473985 | 3.353928 |
| Metastatic Melanoma_Sample 105.1 | 5.52771  | 6.2664716 | 5.493618 | 4.181681 | 3.437043 |
| Metastatic Melanoma_Sample 105.2 | 6.765706 | 5.7681733 | 5.374875 | 4.268326 | 3.592625 |
| Metastatic Melanoma_Sample 105.3 | 6.735855 | 6.9822493 | 5.976039 | 4.568003 | 3.676711 |
| Metastatic Melanoma_Sample 105.4 | 6.181567 | 5.7208498 | 5.059079 | 4.780228 | 3.770876 |
| Metastatic Melanoma_Sample 105.5 | 7.297485 | 6.2917219 | 6.090828 | 5.129549 | 3.405348 |
| Metastatic Melanoma_Sample 105.6 | 6.702196 | 5.83394   | 5.907083 | 4.356255 | 3.248035 |
| Metastatic Melanoma_Sample C007  | 6.274251 | 6.3676612 | 6.743639 | 3.760457 | 3.788107 |
| Metastatic Melanoma_Sample C009  | 5.387024 | 6.3172661 | 5.350993 | 3.405365 | 4.307266 |
| Metastatic Melanoma_Sample C010  | 4.717313 | 5.4583211 | 6.552593 | 4.099914 | 4.277267 |
| Metastatic Melanoma_Sample C012  | 5.427022 | 6.8761292 | 6.346214 | 4.671875 | 4.272682 |
| Metastatic Melanoma_Sample C014  | 6.747681 | 5.8577268 | 6.751975 | 3.829324 | 3.69537  |
| Metastatic Melanoma_Sample C015  | 4.874379 | 5.822499  | 6.403344 | 4.634102 | 4.039542 |
| Metastatic Melanoma_Sample C018  | 5.185053 | 6.0755876 | 6.874889 | 4.961734 | 4.545418 |
| Metastatic Melanoma_Sample C021  | 4.614871 | 5.9282302 | 6.98487  | 3.380947 | 3.60516  |
| Metastatic Melanoma_Sample C022  | 4.80784  | 6.2589879 | 6.256296 | 4.504427 | 3.608908 |
| Metastatic Melanoma_Sample C024  | 5.30695  | 6.9358144 | 6.734203 | 6.057632 | 3.942852 |
| Metastatic Melanoma_Sample C025  | 6.257221 | 5.823421  | 6.023754 | 5.224619 | 4.116742 |
| Metastatic Melanoma_Sample C027  | 4.809192 | 6.2278062 | 6.136791 | 4.251532 | 3.393672 |
| Metastatic Melanoma_Sample C038  | 7.146764 | 6.0662321 | 6.97166  | 4.445745 | 3.325747 |
| Metastatic Melanoma_Sample MM.A  | 5.223342 | 6.0420617 | 5.353053 | 4.732283 | 4.345964 |
| Metastatic Melanoma_Sample MM.B  | 5.766691 | 6.0311356 | 6.112592 | 4.314211 | 4.37924  |
| Metastatic Melanoma_Sample MM.E  | 5.875619 | 6.158924  | 6.285871 | 5.571146 | 3.991362 |
| Metastatic Melanoma_Sample MM.F  | 5.200084 | 6.6028373 | 6.263324 | 5.102053 | 4.157724 |
| Metastatic Melanoma_Sample MM.H  | 3.808491 | 6.2415725 | 5.951616 | 4.155219 | 3.631449 |
| Metastatic Melanoma_Sample MM.I  | 4.721878 | 6.0128818 | 4.898911 | 4.428661 | 4.098491 |
| Metastatic Melanoma_Sample MM.K  | 5.557617 | 6.6251368 | 6.663091 | 5.166894 | 3.419921 |
| Metastatic Melanoma_Sample MM.L  | 8.949277 | 6.7627421 | 7.280149 | 5.113589 | 3.126771 |
| Primary Melanoma_Sample 8.3      | 8.717446 | 6.6825086 | 5.977469 | 4.550253 | 3.179153 |
| Primary Melanoma_Sample 15.5     | 6.674784 | 5.4810194 | 5.363871 | 3.560161 | 4.021215 |
| Primary Melanoma_Sample 20.1     | 7.906199 | 6.7505671 | 6.256371 | 5.12139  | 3.435118 |
| Primary Melanoma_Sample 71.5     | 7.868622 | 5.484734  | 4.763993 | 3.539064 | 2.639087 |
| Primary Melanoma_Sample 72.2     | 9.329591 | 5.8972336 | 7.02984  | 4.117062 | 3.627301 |
| Primary Melanoma_Sample 72.4     | 8.401453 | 6.0609526 | 6.550374 | 3.60953  | 3.189427 |
| Primary Melanoma_Sample 74.5     | 8.989238 | 6.0291168 | 6.789282 | 4.827384 | 3.340867 |
| Primary Melanoma_Sample 78.2     | 6.989393 | 5.8165133 | 5.748126 | 3.523556 | 2.889487 |
| Primary Melanoma_Sample 79.3     | 7.914355 | 6.2471714 | 6.533138 | 4.952775 | 3.522594 |
| Primary Melanoma_Sample 87.3     | 7.571511 | 5.4318622 | 5.175841 | 3.34658  | 3.987912 |
| Primary Melanoma_Sample 89.2     | 8.311879 | 6.1979792 | 5.653804 | 4.539649 | 3.097319 |
| Primary Melanoma_Sample 89.4     | 6.182137 | 6.5916217 | 5.95471  | 3.448415 | 4.046458 |
| Primary Melanoma_Sample 89.5     | 9.39511  | 6.4827884 | 6.673693 | 4.07537  | 3.496114 |
| Primary Melanoma_Sample 89.6     | 7.8235   | 6.4059339 | 5.631422 | 3.557487 | 3.572886 |
| Primary Melanoma_Sample 90.3     | 8.16898  | 6.5431629 | 6.509952 | 5.23379  | 5.035261 |

|                               |          |           |          |          |          |
|-------------------------------|----------|-----------|----------|----------|----------|
| Primary Melanoma_Sample 90.5  | 8.735561 | 6.3013453 | 5.577041 | 4.905306 | 3.508824 |
| Primary Melanoma_Sample 90.6  | 6.914926 | 6.1611327 | 5.51814  | 4.595479 | 3.836398 |
| Primary Melanoma_Sample 102.5 | 7.026271 | 6.1143016 | 5.447376 | 4.651958 | 4.011196 |
| Primary Melanoma_Sample 102.6 | 8.055489 | 5.67667   | 5.856928 | 3.922943 | 3.109653 |
| Primary Melanoma_Sample 103.1 | 7.070273 | 6.3743539 | 5.450938 | 3.865348 | 3.737633 |
| Primary Melanoma_Sample 103.2 | 5.957554 | 5.6594241 | 5.080015 | 4.544166 | 2.994362 |
| Primary Melanoma_Sample 103.3 | 8.653118 | 6.5613798 | 6.574052 | 4.996979 | 3.344541 |
| Primary Melanoma_Sample 103.4 | 8.080941 | 5.9834293 | 6.044598 | 4.655925 | 3.724239 |
| Primary Melanoma_Sample 103.5 | 7.603337 | 6.5774232 | 6.324947 | 4.453536 | 3.6686   |
| Primary Melanoma_Sample 104.5 | 9.21725  | 6.9349964 | 6.904837 | 5.469543 | 3.675318 |
| Primary Melanoma_Sample 104.6 | 7.924841 | 6.0020966 | 6.443233 | 5.115905 | 3.18888  |
| Primary Melanoma_Sample 106.1 | 8.807832 | 6.4072175 | 5.420815 | 5.234348 | 3.47075  |
| Primary Melanoma_Sample 106.2 | 7.825297 | 6.3712375 | 6.607836 | 4.035121 | 3.594649 |
| Primary Melanoma_Sample 106.3 | 7.965065 | 6.3377605 | 6.408979 | 4.683431 | 3.450109 |
| Primary Melanoma_Sample 107.4 | 9.452223 | 6.7981221 | 5.868135 | 2.973208 | 3.460549 |
| Primary Melanoma_Sample 107.5 | 8.672523 | 6.5191169 | 5.924796 | 4.145977 | 3.002316 |

| EGFR      | EGFR average       | MITF               |
|-----------|--------------------|--------------------|
| 211551_at |                    | 207233_s_at        |
| EGFR      |                    | MITF               |
| Hs.488293 |                    | Hs.166017          |
| 6.810024  | <b>4.945953274</b> | <b>10.71798863</b> |
| 6.54549   | <b>5.355361591</b> | <b>10.83906863</b> |
| 6.413576  | <b>5.497624761</b> | <b>10.83545181</b> |
| 6.812486  | <b>5.486021391</b> | <b>8.004783903</b> |
| 5.963534  | <b>4.862836174</b> | <b>8.102116721</b> |
| 6.410807  | <b>4.523402908</b> | <b>11.58847736</b> |
| 7.326944  | <b>5.796565091</b> | <b>8.858132084</b> |
| 6.762413  | <b>6.039155809</b> | <b>7.740873993</b> |
| 6.696981  | <b>5.170737755</b> | <b>11.42729645</b> |
| 5.823037  | <b>4.188882498</b> | <b>10.46472136</b> |
| 6.625303  | <b>5.512210699</b> | <b>8.725856175</b> |
| 7.056253  | <b>5.820437077</b> | <b>11.06290863</b> |
| 6.778739  | <b>5.052913186</b> | <b>10.75736954</b> |
| 6.90496   | <b>5.068006574</b> | <b>11.36108863</b> |
| 7.222294  | <b>5.888260659</b> | <b>8.752462266</b> |
| 6.457285  | <b>5.107556358</b> | <b>10.60658899</b> |
| 6.477051  | <b>5.17613839</b>  | <b>9.381717448</b> |
| 6.58062   | <b>5.325931267</b> | <b>9.793310721</b> |
| 6.778256  | <b>5.568249838</b> | <b>9.847804539</b> |
| 6.370776  | <b>4.577981688</b> | <b>11.10382618</b> |
| 6.863468  | <b>5.241495181</b> | <b>7.953555903</b> |
| 6.268269  | <b>5.251943983</b> | <b>9.749492448</b> |
| 6.598619  | <b>4.581640262</b> | <b>11.51844954</b> |
| 6.44795   | <b>5.26787008</b>  | <b>9.201253175</b> |
| 6.753623  | <b>5.327275812</b> | <b>9.581543903</b> |
| 6.710028  | <b>4.648467308</b> | <b>11.3495919</b>  |
| 6.546749  | <b>5.305035386</b> | <b>8.151092266</b> |
| 6.505119  | <b>5.150352195</b> | <b>8.39514663</b>  |
| 6.609625  | <b>5.1821301</b>   | <b>11.3931189</b>  |
| 6.594224  | <b>5.191974664</b> | <b>8.767904084</b> |
| 6.067507  | <b>4.924646606</b> | <b>10.89714136</b> |
| 6.887113  | <b>5.235178091</b> | <b>9.923971084</b> |
| 6.510516  | <b>4.882201236</b> | <b>10.82535281</b> |
| 6.592914  | <b>5.094150218</b> | <b>11.2850399</b>  |
| 7.096444  | <b>5.258760888</b> | <b>10.88889618</b> |
| 6.708292  | <b>6.070970912</b> | <b>10.7728359</b>  |
| 6.27738   | <b>5.049298891</b> | <b>10.39917699</b> |
| 6.764944  | <b>5.075990123</b> | <b>11.24860954</b> |
| 6.581741  | <b>5.082973018</b> | <b>10.70941227</b> |
| 6.573416  | <b>5.299247165</b> | <b>10.54485381</b> |
| 6.878774  | <b>5.12866868</b>  | <b>11.54506681</b> |
| 5.531167  | <b>4.802266286</b> | <b>11.21628045</b> |

|          |             |             |
|----------|-------------|-------------|
| 6.597771 | 5.288612253 | 10.99311499 |
| 6.36177  | 4.887623059 | 10.82474072 |
| 6.781388 | 4.883376486 | 11.4782859  |
| 6.528705 | 5.668048919 | 10.56206954 |
| 6.683094 | 5.264936155 | 10.36825499 |
| 6.295941 | 5.344274529 | 10.6775489  |
| 7.023239 | 5.827016015 | 10.09183554 |
| 6.096344 | 5.268157344 | 9.794774993 |
| 7.107262 | 5.887032235 | 10.02316536 |
| 6.508407 | 5.425985933 | 9.946667721 |
| 6.959724 | 5.648973376 | 8.105075266 |
| 6.932929 | 5.28347382  | 9.855839266 |
| 6.461072 | 5.261079786 | 10.55736136 |
| 6.870327 | 5.744041403 | 11.49769045 |
| 6.988751 | 5.645137867 | 8.156108175 |
| 6.358324 | 5.355364928 | 11.05053863 |
| 7.116479 | 5.793193412 | 10.99974954 |
| 6.853759 | 5.227972917 | 8.179241266 |
| 6.926784 | 5.393873718 | 11.09929754 |
| 6.905078 | 5.980421355 | 10.60933254 |
| 6.634548 | 5.680050888 | 10.62528108 |
| 6.40756  | 5.204425521 | 11.56531527 |
| 6.648318 | 5.767411089 | 8.025602993 |
| 7.123534 | 5.470039526 | 10.46205227 |
| 6.872558 | 5.579404777 | 10.22253954 |
| 6.820587 | 5.783918011 | 8.237661993 |
| 6.750212 | 5.679372258 | 10.44191372 |
| 6.47481  | 5.043859651 | 10.56827818 |
| 6.69509  | 5.14265223  | 10.7452689  |
| 7.214703 | 5.774560759 | 10.89113463 |
| 6.82088  | 6.342234748 | 8.044023266 |
| 6.322004 | 5.904805748 | 10.72142681 |
| 6.512246 | 5.268882729 | 10.8570359  |
| 6.910602 | 6.063374279 | 10.20818863 |
| 5.808827 | 5.017387567 | 11.03532681 |
| 5.82991  | 5.971822942 | 9.920688266 |
| 6.424627 | 5.706060549 | 9.233671721 |
| 6.065005 | 6.006815442 | 9.483278175 |
| 6.491685 | 5.243126695 | 10.64349227 |
| 6.522594 | 5.948771294 | 9.854119175 |
| 6.064825 | 5.263088429 | 10.96412627 |
| 5.93811  | 5.623123229 | 9.743450903 |
| 6.593688 | 5.469504773 | 10.58453045 |
| 5.622272 | 5.957557785 | 9.850457539 |
| 6.470069 | 5.576882929 | 11.14841772 |
| 6.930883 | 6.403671711 | 9.480724993 |

|          |                    |                    |
|----------|--------------------|--------------------|
| 6.288883 | <b>5.886159821</b> | <b>10.00671745</b> |
| 6.559381 | <b>5.597575965</b> | <b>10.98485008</b> |
| 6.846022 | <b>5.682853948</b> | <b>10.61675827</b> |
| 5.989398 | <b>5.435180156</b> | <b>9.837881993</b> |
| 6.951562 | <b>5.575018001</b> | <b>10.74432172</b> |
| 6.477767 | <b>5.11888129</b>  | <b>10.83620681</b> |
| 6.817549 | <b>6.157936503</b> | <b>9.358636357</b> |
| 6.59572  | <b>5.847475191</b> | <b>9.994099084</b> |
| 6.690868 | <b>5.886451836</b> | <b>11.38665999</b> |
| 6.69177  | <b>6.482285736</b> | <b>9.334641084</b> |
| 6.514721 | <b>5.864946103</b> | <b>9.793118266</b> |
| 6.865634 | <b>6.03443286</b>  | <b>10.53048627</b> |
| 6.119916 | <b>5.759009467</b> | <b>9.87946263</b>  |
| 6.66187  | <b>5.917869017</b> | <b>10.7515959</b>  |
| 6.300317 | <b>5.808759065</b> | <b>10.7649219</b>  |
| 6.531698 | <b>5.79940459</b>  | <b>10.18625836</b> |

**Table S3**

© 2000-2013 Ingenuity Systems, Inc. All rights reserved.

| Upstream Regulator | Log Ratio | Molecule Type                     |
|--------------------|-----------|-----------------------------------|
| MITF               | -2.604    | transcription regulator           |
| MYCN               |           | transcription regulator           |
| estrogen receptor  |           | group                             |
| SREBF2             |           | transcription regulator           |
| GFI1               |           | transcription regulator           |
| MYC                | -0.908    | transcription regulator           |
| SPDEF              |           | transcription regulator           |
| MEOX2              |           | transcription regulator           |
| THRB               |           | ligand-dependent nuclear receptor |
| NR3C1              | 0.629     | ligand-dependent nuclear receptor |
| THRA               |           | ligand-dependent nuclear receptor |
| ISL1               | 0.744     | transcription regulator           |
| NAB2               | -0.462    | transcription regulator           |
| ZFP36              | 0.677     | transcription regulator           |
| RBPJ               | 1.071     | transcription regulator           |
| NR1H3              | -0.126    | ligand-dependent nuclear receptor |
| KLF2               | 1.210     | transcription regulator           |
| SKI                | -0.246    | transcription regulator           |
| Nr1h               |           | group                             |
| NR1H2              | 0.142     | ligand-dependent nuclear receptor |
| SOX10              | -5.020    | transcription regulator           |
| ESRRA              | -0.630    | ligand-dependent nuclear receptor |
| MKL2               | -0.289    | transcription regulator           |
| NOTCH1             | -0.031    | transcription regulator           |
| STAT5A             | -1.192    | transcription regulator           |
| SMAD2              | -0.213    | transcription regulator           |
| Creb               |           | group                             |
| CREBBP             | -0.163    | transcription regulator           |
| FOS                | -0.244    | transcription regulator           |
| SRF                | 0.837     | transcription regulator           |
| Smad               |           | complex                           |
| KAT2B              | -1.747    | transcription regulator           |
| BCL10              | 0.231     | transcription regulator           |
| TGIF1              | 0.002     | transcription regulator           |
| PLAGL1             | 0.742     | transcription regulator           |
| NCOA1              | -0.371    | transcription regulator           |
| PPRC1              | 0.282     | transcription regulator           |
| TSC22D1            | 1.913     | transcription regulator           |
| SMAD3              | 1.207     | transcription regulator           |
| EZH2               | -0.197    | transcription regulator           |
| NUPR1              | -1.740    | transcription regulator           |
| MKL1               | 0.139     | transcription regulator           |
| RORC               |           | ligand-dependent nuclear receptor |
| STAT4              | 0.442     | transcription regulator           |

|            |        |                                   |
|------------|--------|-----------------------------------|
| NCOA2      |        | transcription regulator           |
| CBFB       | -0.125 | transcription regulator           |
| EGR1       | 0.487  | transcription regulator           |
| ESR2       |        | ligand-dependent nuclear receptor |
| NFATC2     |        | transcription regulator           |
| CEBPA      |        | transcription regulator           |
| ETS1       | -0.263 | transcription regulator           |
| STAT1      | -0.294 | transcription regulator           |
| ATF2       | -0.372 | transcription regulator           |
| HMGB1      | -0.337 | transcription regulator           |
| SMAD1      |        | transcription regulator           |
| JUN        | 2.326  | transcription regulator           |
| NfκB-RelA  |        | complex                           |
| MTPN       | -0.224 | transcription regulator           |
| EP300      | -0.410 | transcription regulator           |
| NfκB1-RelA |        | complex                           |
| STAT3      | 0.156  | transcription regulator           |
| NFKB1      | -0.482 | transcription regulator           |
| Ap1        |        | complex                           |
| HIF1A      | 0.742  | transcription regulator           |
| EPAS1      | 1.339  | transcription regulator           |
| RELA       | 0.031  | transcription regulator           |

| Predicted Activation State | Activation z-score | p-value of overlap | log10(p value) |
|----------------------------|--------------------|--------------------|----------------|
| Inhibited                  | -5.391             | 6.37E-39           | 3.82E+01       |
| Inhibited                  | -3.918             | 1.52E-07           | 6.82E+00       |
| Inhibited                  | -3.366             | 6.82E-20           | 1.92E+01       |
| Inhibited                  | -3.072             | 3.40E-08           | 7.47E+00       |
| Inhibited                  | -3.058             | 1.50E-05           | 4.82E+00       |
| Inhibited                  | -2.982             | 1.16E-11           | 1.09E+01       |
| Inhibited                  | -2.84              | 4.48E-12           | 1.13E+01       |
| Inhibited                  | -2.61              | 5.03E-08           | 7.30E+00       |
| Inhibited                  | -2.55              | 6.80E-03           | 2.17E+00       |
| Inhibited                  | -2.52              | 4.11E-14           | 1.34E+01       |
| Inhibited                  | -2.433             | 1.65E-03           | 2.78E+00       |
| Inhibited                  | -2.425             | 1.36E-01           | 8.66E-01       |
| Inhibited                  | -2.395             | 7.45E-05           | 4.13E+00       |
| Inhibited                  | -2.395             | 7.45E-05           | 4.13E+00       |
| Inhibited                  | -2.387             | 3.44E-09           | 8.46E+00       |
| Inhibited                  | -2.332             | 1.93E-06           | 5.71E+00       |
| Inhibited                  | -2.298             | 6.42E-13           | 1.22E+01       |
| Inhibited                  | -2.23              | 1.44E-04           | 3.84E+00       |
| Inhibited                  | -2.228             | 3.73E-05           | 4.43E+00       |
| Inhibited                  | -2.18              | 3.15E-05           | 4.50E+00       |
| Inhibited                  | -2.153             | 2.59E-05           | 4.59E+00       |
| Inhibited                  | -2.138             | 6.19E-02           | 1.21E+00       |
| Activated                  | 2                  | 8.41E-04           | 3.08E+00       |
| Activated                  | 2.107              | 8.10E-15           | 1.41E+01       |
| Activated                  | 2.118              | 1.34E-03           | 2.87E+00       |
| Activated                  | 2.136              | 2.97E-05           | 4.53E+00       |
| Activated                  | 2.139              | 3.66E-05           | 4.44E+00       |
| Activated                  | 2.159              | 5.38E-04           | 3.27E+00       |
| Activated                  | 2.165              | 1.07E-15           | 1.50E+01       |
| Activated                  | 2.173              | 1.03E-04           | 3.99E+00       |
| Activated                  | 2.175              | 6.51E-05           | 4.19E+00       |
| Activated                  | 2.202              | 1.83E-03           | 2.74E+00       |
| Activated                  | 2.203              | 1.40E-05           | 4.85E+00       |
| Activated                  | 2.205              | 3.06E-04           | 3.51E+00       |
| Activated                  | 2.207              | 2.12E-04           | 3.67E+00       |
| Activated                  | 2.229              | 9.41E-02           | 1.03E+00       |
| Activated                  | 2.236              | 2.96E-10           | 9.53E+00       |
| Activated                  | 2.236              | 2.86E-06           | 5.54E+00       |
| Activated                  | 2.286              | 4.98E-07           | 6.30E+00       |
| Activated                  | 2.387              | 3.79E-07           | 6.42E+00       |
| Activated                  | 2.405              | 6.24E-08           | 7.20E+00       |
| Activated                  | 2.407              | 1.45E-03           | 2.84E+00       |
| Activated                  | 2.425              | 5.78E-05           | 4.24E+00       |
| Activated                  | 2.431              | 1.65E-07           | 6.78E+00       |



|           |       |          |          |
|-----------|-------|----------|----------|
| Activated | 2.433 | 3.74E-03 | 2.43E+00 |
| Activated | 2.449 | 8.05E-02 | 1.09E+00 |
| Activated | 2.464 | 1.69E-11 | 1.08E+01 |
| Activated | 2.493 | 1.66E-06 | 5.78E+00 |
| Activated | 2.5   | 1.82E-07 | 6.74E+00 |
| Activated | 2.5   | 1.70E-08 | 7.77E+00 |
| Activated | 2.509 | 6.28E-05 | 4.20E+00 |
| Activated | 2.599 | 1.69E-04 | 3.77E+00 |
| Activated | 2.599 | 7.79E-06 | 5.11E+00 |
| Activated | 2.671 | 1.64E-04 | 3.79E+00 |
| Activated | 2.765 | 7.40E-06 | 5.13E+00 |
| Activated | 2.803 | 8.25E-19 | 1.81E+01 |
| Activated | 2.974 | 2.31E-07 | 6.64E+00 |
| Activated | 3.058 | 4.55E-05 | 4.34E+00 |
| Activated | 3.104 | 7.39E-05 | 4.13E+00 |
| Activated | 3.116 | 5.89E-08 | 7.23E+00 |
| Activated | 3.262 | 3.05E-15 | 1.45E+01 |
| Activated | 3.285 | 1.86E-10 | 9.73E+00 |
| Activated | 3.884 | 7.71E-09 | 8.11E+00 |
| Activated | 3.933 | 2.72E-22 | 2.16E+01 |
| Activated | 4.227 | 1.43E-15 | 1.48E+01 |
| Activated | 4.465 | 1.13E-13 | 1.29E+01 |

## Target molecules in dataset

ACP5,ACSL1,ALCAM,APOLD1,ASAH1,BIRC7,C8orf44-SGK3/SGK3,CD151,CD44,CDK2,CDK5R1,CLCN7,CTSK,DSTYK,EC  
 ALDH1A1,BASP1,CAV1,CDKN1A,CITED2,CKAP4,COL4A1,COL8A1,CRIM1,CTGF,DKK3,E2F2,EGFR,FN1,HMGA1,IGFBP  
 AXL,BDNF,CALB2,CAPG,CAV1,CD24,CD44,CDH13,COL12A1,COL13A1,COL4A1,COL4A5,COL5A1,COL7A1,CTGF,CXCL  
 ACSL1,CDKN1A,DBI,FABP5,FASN,FDFT1,HES6,HMGCS1,IDH1,INSIG1,IRS2,LDLR,PLIN2,SC5D,SCD,SQLE  
 CDKN1A,IL1B,IL6,IL7R,IL8,IRAK2,IRF1,JUN,KAT2B,LPAR1,NFKBIA,NT5E,SERPINA3,SMAD3  
 ADK,ADM,AFP,ALCAM,BCL2L1,BDNF,CAST,CAV1,CD151,CD44,CDK2,CDKN1A,COL4A1,COL5A1,COL8A1,COX5B,CSP  
 BIRC3,CDKN1A,COL13A1,COL4A1,COL4A5,COL5A1,CTGF,DKK3,EGFR,IL8,ITGA3,ITGA5,LASP1,LEF1,PLAUR,PTPRF,SC  
 CCL2,CCL20,CDKN1A,CXCL1,CXCL2,F3,FGF2,HBEGF,ID1,IL6,IL8,VEGFC  
 CCL2,CSF2,CXCL2,DKK1,FASN,GSN,ID1,IL6,JUN,LDLR,MBP,PAM,PPARG,SFRP1,TGFBI  
 ADM,ANGPTL4,BCL2L1,BDNF,BIRC3,BMP2,CCL2,CCL5,CDC42EP3,CDKN1A,CHIC2,CLCF1,CSF2,CSRNP1,CYP27A1,DB  
 CCL2,CD44,CDKN1A,CSF2,CXCL2,FASN,IL6,JUN,LDLR,MBP,PPARG  
 AJAP1,CALB2,ETV4,ETV5,FGF13,RUNX3  
 CDKN1A,F3,FGF2,FN1,MMP3,PPARG  
 BIRC3,CDKN1A,CSF2,IL1B,IL6,PTGS2  
 BMP2,CD44,CDKN1A,CSF2,DUSP1,FGF13,FGF2,HES1,IL1B,IL6,JUN,LEF1,LFNG,LIF,MMP3,PRDM1,RUNX3,SDC1,SOX  
 CCL5,FASN,FDFT1,GPAM,IL1B,IL6,LDLR,MYLIP,NFKBIA,PLTP,PPARG,PTGS2,RARA,SCD,VEGFA  
 ADM,CCL2,CDKN1A,COL4A1,CTGF,EPAS1,F3,GADD45A,ID1,IL1B,IL1RL1,IL6,IL8,KCNN4,MAP3K5,MT2A,MYH10,NFK  
 CDKN1A,MBP,MITF,ODC1,PMP22,SERPINE1  
 CAV1,CCL5,CSF2,CXCL1,FASN,IL6,IL8,PLTP,PTGS2,SCARB1,SCD  
 CCL5,FASN,FDFT1,IL1B,IL6,LDLR,NFKBIA,PLTP,PTGS2,SCD,VEGFA  
 EDNRB,ERBB3,GAS7,MITF,PLP1,PMP22,SOX10  
 ACSL1,ASAH1,B4GALT6,CD36,COX5B,GALM,HMGCS1,LDHA,PPARG,PTGS2,SOX9  
 BCL2L1,CCL5,CD151,CNN2,DHCR24,HLA-B,ITGB1,MGST2,MYH9,SCARB1,VCL  
 ADAM19,ANKRD1,BCL2L1,BIRC3,BMP2,CD82,CDK2,CDKN1A,CTGF,CYR61,EFNB2,EGFR,ERBB3,ESM1,FABP7,FGF2,H  
 ATM,BCL2L1,BIRC3,CDKN1A,EPAS1,GADD45A,ID1,IL24,IL6,IRF1,MAF,PPARG,STAT5A,TNFRSF14  
 CDKN1A,CTGF,GADD45B,HES1,IL6,ITGB1,MET,S1PR1,SERPINE1,SMAD3,SOX2,TPM1  
 ADM,ANTXR2,BDNF,CDKN1A,COL8A1,CTSB,DUSP1,ETV5,HES1,IER3,IL11,IL6,IL8,JUN,LASP1,LDHA,LDLR,MITF,MMP  
 CAMK2G,CCL5,CD44,CDKN1A,CYR61,FGF2,HLA-B,HLA-DRA,HMGCS1,IL6,IL8,IRF1,JUN,KLF2,LDLR,MGMT,MIA,PTGS  
 ACP5,AGTR1,AKR1C3,BDNF,CAST,CCL2,CD44,COBLL1,CTGF,CTSB,CTSH,CTSL2,CXCL16,CYP2J2,DAP,ESM1,F3,FGF2,F  
 ANKRD1,APOLD1,BCL2L1,BMP2,CCL5,CDKN1A,CNN2,CTGF,CXorf48,FHL1,GLIPR1,GSN,HES6,IL15,ITGA1,ITGB1,JUN  
 ANGPTL4,CDKN1A,CTGF,ID1,SERPINE1,VEGFA,WNT5A  
 CDKN1A,HLA-B,KAT2B,KLF2,PTGS2,TGFBR2  
 CCL5,CD44,CSF2,CXCL2,IL6,IL8  
 CXCL1,CXCL2,IL1B,IL6,IL8  
 ANGPTL4,CDKN1A,LDHA,PLIN2,PPARG  
 CDKN1A,FGF2,IL6,NFKBIA,PPARG,SERPINE1  
 CCL20,CLDN1,CT45A5,EPHB1,ERRFI1,ESM1,GDF15,GNG11,IL13RA2,IL8,LAMB3,NFKBIZ,PTGS2,RND3,SPRR2D  
 FN1,IL1B,IL6,IL8,SERPINE1  
 ANKRD1,BMP2,CCL2,CDKN1A,COL7A1,CTGF,GADD45B,HBEGF,ID1,IL15,IL1B,IL6,ITGB1,JUN,LUM,MMP1,S1PR1,SEF  
 BIRC3,C15orf48,CD82,CDKN1A,CSF2,CXCL1,CXCL2,DKK1,EGFR,FHOD3,GDF15,IL11,IL24,IL6,IL8,ITGA1,KRT81,NFKBI  
 ACSS1,ADM,ASB9,BNIP3,CD63,CDK2,CITED2,CYR61,DDIT3,DHCR24,ELL2,FOXD1,GAB2,GADD45A,GBP2,GDF15,GR/  
 BCL2L1,CCL5,CD151,CNN2,DHCR24,HLA-B,ITGB1,MGST2,MYH9,MYLK,SCARB1,VCL  
 CCL20,CCL5,CD36,CSF2,CXCL2,DHCR24,FDFT1,GADD45B,IL1B,IL6,MC1R,MT1E,NNMT,SLC16A10,SLC25A24,SLC7A2  
 ACSS1,BCL2L1,CCL2,CDK2,CXCL2,DAP,ERRFI1,ETV5,FSCN1,GBE1,HES6,IER3,IL6,IRF1,IRF4,ISG20,KLF9,KRT18,MT1E,

BMP2,CCL5,CDKN1A,IL6,NFKBIA,PPARG,PTGS2  
LGMM,NRP1,RAB3IP,RUNX3,TGFBR2,TGFBR3  
CAV1,CCL2,CD44,CDK5R1,CDKN1A,CXCL2,EGFR,F3,FGF2,FN1,GAD1,GADD45A,GADD45B,GDF15,IL1B,IL8,JUN,LDLR  
BMP2,CAV1,CCL2,CDKN1A,CSF2,DKK1,FOXA1,IL1B,IL8,ITGA2,ITGB1,MMP1,NKX3-1,PTGS2,RARA,SCARB1,TGM2,TII  
ACP5,ATM,CDKN1A,CITED2,CSF2,ENPP2,IL15,IRF1,IRF4,ISG20,ITPR1,LDHA,NFKBIZ,PLK2,PPARG,PTGS2,S100A3,SLC  
ACSL1,AKR1B1,AKR1B10,AKR1C3,CCL20,CDKN1A,CKAP4,EEF1A2,EFNB2,FASN,FHL1,GADD45A,GAS1,GLIPR1,GLRX,I  
BCL11A,CAV1,CCL2,CDK2,CDKN1A,CITED2,CSF2,CTGF,FN1,FOXD1,IL24,INSIG1,MET,MMP1,MMP3,NKX3-1,RUNX3,  
AXL,BCL2L1,CCL2,CCL5,CDK2,CDKN1A,CSF2,FGF2,GBP2,IFI6,IL15,IL1B,IL6,IL8,IRF1,JUN,LY6E,PDGFC,PHACTR1,PMA  
DDIT3,DUSP1,FN1,GADD45A,HRK,IL6,IL8,ITGB8,JUN,MMP1,MT2A,PPARG,PTGS2  
CCL2,CCL20,CDKN1A,IL1B,IL6,IL8,MIA,MMP1,MMP3,PTGES,PTGS2  
BCL2L1,CDKN1A,COL4A1,CTGF,CXCL2,GADD45B,ID1,IRF1,SOX9  
ACP5,AFP,AXL,BDNF,BIRC3,CAV1,CCL2,CD44,CDK5R1,CDKN1A,CSF2,CTGF,CXCL16,CYP2J2,DKK1,DUSP1,EGFR,F3,F/  
BCL2L1,CCL2,CCL5,CSF2,IL1B,IL6,IL8,NFKBIA,PTGS2  
BCL2L1,BNIP3,COL8A1,FN1,GAS6,IL6,JUN,MMP3,MT1E,S100A6,SERPINE1,SOX2,SPARC  
BCL2L1,CCL2,CDK2,CDKN1A,DUSP1,FASN,FN1,FTH1,HIST1H4A (includes others),HLA-B,ID1,IL6,IL8,JUN,MGMT,MIA  
CCL2,CCL5,CSF2,CXCL1,IL15,IL6,IL8,MMP1,MMP3,PTGS2  
ADM,ANGPTL4,BCL2L1,CCL2,CCL20,CCL5,CDKN1A,CEACAM1,COL5A1,CSF2,CTSB,CXCL2,DDIT3,EPAS1,FASN,FGF2,F/  
AKR1B1,ANKRD1,BCL2L1,BIRC3,BMP2,CCL2,CCL20,CCL5,CD82,CDKN1A,CSF2,CTSB,CXCL2,DUSP1,EGFR,ENPP2,FSCI  
CCL2,CD44,CSF2,DDIT3,F3,FN1,IL17D,IL1B,IL6,IL8,ITGA2,JUN,KCNN4,KRT18,MET,MMP1,MMP3,MT2A,PRDM1,PTC  
ADAMTS1,ADM,AFP,ANGPTL4,BCL2L1,BHLHE41,BMP2,BNIP3,CAV1,CD24,CDKN1A,CITED2,CYR61,EGFR,EPAS1,FHL  
ADM,ANGPTL4,BIRC3,BNIP3,CAV1,CITED2,CXCL2,DDIT3,EGFR,FASN,FHL1,FN1,GADD45B,GBE1,HIST1H1C,HIST1H2.  
AFP,ANKRD1,BCL2L1,BIRC3,BMP2,CAV1,CCL2,CCL20,CCL5,CD44,CDKN1A,CSF2,CTSB,CXCL1,CXCL2,DDIT3,DUSP1,EI

## Mechanistic Network

Ap1,EP300,HDAC1,JUN,KAT2B,MITF,SPI1

Akt,Ap1,ERK,JUN,MMP2,MYC,MYCN,NFkB (complex),NOTCH1,PPARG,RELA,STAT1,STAT3,TP53

Ap1,EGF,EGR1,ESR1,ESR2,FOS,HIF1A,JUN,NFkB (complex),RB1,RELA,SMAD4,SP1,SRC,TP53,estrogen,estrogen rece

Ap1,CEBPB,CREB1,ESR1,ESR2,FOXO1,FOXO3,Ins1,Nr1h,PPARD,PPARG,PPARGC1A,RELA,RXRA,SP1,SREBF1,SREBF2,CEBPB,GFI1,IL10,IL1B,JUN,NFKB1,NFKB2,NFKBIA,NFkB (complex),RELA,RELB,SP1,STAT3,TP53

ATF2,Ap1,CEBPB,CREBBP,EGR1,EP300,ERK1/2,ESR1,JUN,MAX,MYC,MYCN,RB1,RELA,SMAD4,SP1,TP53,beta-estradiol,CTNNB1,NFkB (complex),RUNX2,SMAD4,SPDEF,TCF,TCF4

Ap1,CDKN1A,CDKN2A,E2F1,FOS,JUN,MEOX2,NFKB1,NFKBIA,NFkB (complex),RB1,RELA,SMARCA4,SP1,TP53

CREB1,CREBBP,EGR1,ESR1,FOXO1,HIF1A,L-triiodothyronine,NR1H3,PPARA,PPARG,PPARGC1A,RELA,RNA polymerase II,CEBPB,ESR1,IL6,JUN,NFKB1,NFKBIA,NFkB (complex),NR3C1,RELA,RELB,SP1,STAT3,TNF,TP53,dexamethasone

Ap1,CEBPB,CREB1,FOS,Ins1,JUN,L-triiodothyronine,NFKB1,NFKBIA,NFkB (complex),NR1H3,PPARG,PPARGC1A,PRKRI

AR,EGR1,JUN,NAB2,RB1,RELA,SP1

CSF2,HMGB1,IL10,JUN,MAPK9,NFKB1,NFKBIA,NFKBIB,NFkB (complex),RELA,SIRT1,SP1,STAT1,STAT3,TP53,Tnf (family),ATF2,Ap1,CEBPB,FOS,HMGB1,IL4,JUN,JUND,MAPK8,NFKB1,NFKBIA,NFkB (complex),NOTCH1,NR3C1,RBPJ,RELA,SMAD4

25-hydroxycholesterol,Ap1,CEBPA,EGR1,ESR1,ESR2,NR1H2,NR1H3,NR3C1,Nr1h,PPARA,PPARD,PPARG,PPARGC1A,AR,ARNT,CTNNB1,DEK,HIF1A,IL8,JUN,KLF2,NFKB1,NFKBIA,NFkB (complex),RB1,RELA,SMAD2,SMAD3,SMAD4,SP1,STAT3

Ap1,CEBPB,JUN,RUNX2,Ras,SKI,SP1,STAT3,Smad

ABCA1,CEBPB,ESR1,ESR2,FOXO1,FOXO3,NFKBIA,NFkB (complex),NR1H3,Nr1h,PPARA,PPARD,PPARG,PPARGC1A,RELA,25-hydroxycholesterol,ABCA1,Ap1,CEBPA,EGR1,NFKBIA,NR1H2,NR1H3,Nr1h,PPARA,PPARD,PPARG,RELA,RXRA,SP1

AKT1,Akt,Ap1,CTNNB1,EGFR,ESR1,FOXO1,HDAC1,JUN,NFKB1,NFKBIA,NFkB (complex),NOTCH1,PPARGC1A,RBL1,RIKIN,ATF2,ATM,CREBBP,Creb,EP300,IL6,IRF8,JUN,NFKB1,NFKBIA,NFkB (complex),NR3C1,RELA,SP1,STAT1,STAT3,STAT5A,STAT5B

Ap1,CEBPB,CTNNB1,FOXO1,IL6,NFKBIA,NFkB (complex),NR3C1,PDPK1,RELA,SMAD2,SMAD3,SMAD4,SMAD7,SP1,STAT3,ATF2,Ap1,CEBPB,CREBBP,Creb,EP300,ESR1,Histone h3,IRF1,MMP2,MYC,NFKBIA,NFkB (complex),RELA,RNA polymerase II,ATF2,CREBBP,EP300,ESR1,HDAC1,Hdac,Histone h4,IRF8,JUN,NFKB1,NFKBIA,NFkB (complex),NOTCH1,RELA,RELB,SP1

Ap1,CEBPA,CEBPB,ESR1,ESR2,FOS,FOSL2,HIF1A,JUN,JUNB,JUND,NFKB1,NFKBIA,NFkB (complex),Nfat (family),RELA,IRF1,IRF3,IRF4,IRF5,IRF7,IRF8,IRF9,IRF10,IRF11,IRF12,IRF13,IRF14,IRF15,IRF16,IRF17,IRF18,IRF19,IRF20,IRF21,IRF22,IRF23,IRF24,IRF25,IRF26,IRF27,IRF28,IRF29,IRF30,IRF31,IRF32,IRF33,IRF34,IRF35,IRF36,IRF37,IRF38,IRF39,IRF40,IRF41,IRF42,IRF43,IRF44,IRF45,IRF46,IRF47,IRF48,IRF49,IRF50,IRF51,IRF52,IRF53,IRF54,IRF55,IRF56,IRF57,IRF58,IRF59,IRF60,IRF61,IRF62,IRF63,IRF64,IRF65,IRF66,IRF67,IRF68,IRF69,IRF70,IRF71,IRF72,IRF73,IRF74,IRF75,IRF76,IRF77,IRF78,IRF79,IRF80,IRF81,IRF82,IRF83,IRF84,IRF85,IRF86,IRF87,IRF88,IRF89,IRF90,IRF91,IRF92,IRF93,IRF94,IRF95,IRF96,IRF97,IRF98,IRF99,IRF100

Ap1,EGFR,ESR1,HIF1A,NFkB (complex),NOTCH1,RB1,RUNX2,SMAD5,SP1,Smad,VHL

ATF2,CEBPB,CREBBP,Cbp/p300,EP300,ESR1,Hdac,Histone h4,IRF1,KAT2B,NCOA2,NFKB1,NFKBIA,NFkB (complex),RBL1,IRF1,IRF3,IRF4,IRF5,IRF6,IRF7,IRF8,IRF9,IRF10,IRF11,IRF12,IRF13,IRF14,IRF15,IRF16,IRF17,IRF18,IRF19,IRF20,IRF21,IRF22,IRF23,IRF24,IRF25,IRF26,IRF27,IRF28,IRF29,IRF30,IRF31,IRF32,IRF33,IRF34,IRF35,IRF36,IRF37,IRF38,IRF39,IRF40,IRF41,IRF42,IRF43,IRF44,IRF45,IRF46,IRF47,IRF48,IRF49,IRF50,IRF51,IRF52,IRF53,IRF54,IRF55,IRF56,IRF57,IRF58,IRF59,IRF60,IRF61,IRF62,IRF63,IRF64,IRF65,IRF66,IRF67,IRF68,IRF69,IRF70,IRF71,IRF72,IRF73,IRF74,IRF75,IRF76,IRF77,IRF78,IRF79,IRF80,IRF81,IRF82,IRF83,IRF84,IRF85,IRF86,IRF87,IRF88,IRF89,IRF90,IRF91,IRF92,IRF93,IRF94,IRF95,IRF96,IRF97,IRF98,IRF99,IRF100

ATF2,Ap1,CEBPB,EP300,ESR1,HDAC1,HDAC2,Hsp27,IRF3,JUN,MAPK14,MAPKAPK2,NFKBIA,NFKBIB,NFkB (complex),IRF1,IRF3,IRF4,IRF5,IRF6,IRF7,IRF8,IRF9,IRF10,IRF11,IRF12,IRF13,IRF14,IRF15,IRF16,IRF17,IRF18,IRF19,IRF20,IRF21,IRF22,IRF23,IRF24,IRF25,IRF26,IRF27,IRF28,IRF29,IRF30,IRF31,IRF32,IRF33,IRF34,IRF35,IRF36,IRF37,IRF38,IRF39,IRF40,IRF41,IRF42,IRF43,IRF44,IRF45,IRF46,IRF47,IRF48,IRF49,IRF50,IRF51,IRF52,IRF53,IRF54,IRF55,IRF56,IRF57,IRF58,IRF59,IRF60,IRF61,IRF62,IRF63,IRF64,IRF65,IRF66,IRF67,IRF68,IRF69,IRF70,IRF71,IRF72,IRF73,IRF74,IRF75,IRF76,IRF77,IRF78,IRF79,IRF80,IRF81,IRF82,IRF83,IRF84,IRF85,IRF86,IRF87,IRF88,IRF89,IRF90,IRF91,IRF92,IRF93,IRF94,IRF95,IRF96,IRF97,IRF98,IRF99,IRF100

AR,Ap1,CEBPB,EP300,NFKBIA,NFkB (complex),RB1,RELA,SMAD2,SMAD3,SMAD4,SMAD7,SP1,Smad,TP53,TSC22D1

Ap1,CEBPB,CTNNB1,EGR1,ERK1/2,ESR1,FOS,JUN,NFKBIA,NFkB (complex),RB1,RELA,SMAD2,SMAD3,SMAD4,SMAD7,SP1,STAT3,TP53

Ap1,EP300,ESR1,EZH2,HDAC1,HDAC2,Histone h3,NFKB1,NFkB (complex),PPARG,RB1,RELA,RNA polymerase II,SP1,ESR1,FOXO1,FOXO3,MYC,NFkB (complex),NUPR1,TP53

MKL1,SRF

Ap1,FOS,IFNG,IL12 (complex),IL4,IRF1,NFKB1,NFKBIA,NFkB (complex),RB1,RELA,SMARCA4,SP1,STAT1,STAT3,STAT5A,STAT5B

ADIPOQ,CREBBP,EP300,Hdac,Histone h4,IRF8,JUN,NCOA2,NFKB1,NFKBIA,NFkB (complex),NR3C1,RELA,RNA polym

ATF2,Ap1,CEBPB,EGR1,ERK,ERK1/2,ESR1,JUN,MAPK14,NFKBIA,NFkB (complex),NR3C1,PPARG,RB1,RELA,SMAD3,SI  
 Ap1,CEBPB,EGR1,ERK,ERK1/2,ESR1,ESR2,FOS,JUN,NFkB (complex),Nfat (family),PPARG,RELA,SMAD3,SP1,TP53  
 Ap1,IL2,IL4,IL6,JUN,NFATC2,NFKBIA,NFkB (complex),NR3C1,POU2F1,RELA,SP1,STAT1,STAT3,STAT5A,STAT6,TNF,TF  
 ADIPOQ,ATF2,CEBPA,CREBBP,EP300,ESR1,FOXO1,NFKB1,NFKBIA,NFkB (complex),PPARA,PPARG,RELA,RETN,RXRA,  
 ATF2,CEBPB,CREBBP,EP300,ESR1,ETS1,FN1,HDAC1,HDAC2,IL10,NFKB1,NFKBIA,NFkB (complex),PPARG,RB1,RELA,S  
 Ap1,CD40,FOS,IFNG,IL12 (complex),IRF1,JUN,NFKB1,NFKBIA,NFkB (complex),REL,RELA,RELB,STAT1,STAT3,TP53  
 ATF2,ATP,Ap1,CEBPB,ESR2,FOS,HMGB1,JUN,JUND,Jnk,NFkB (complex),NR3C1,P38 MAPK,RELA,SP1,TP53  
 ATF2,Ap1,CEBPB,EGR1,ERK1/2,ESR1,HMGB1,IL18,IL1A,JUN,MAPK8,NFKB1,NFKBIA,NFkB (complex),NR3C1,RELA,RE  
 ATF2,CEBPB,CREBBP,EP300,ESR1,NFKB1,NFKBIA,NFkB (complex),NOTCH1,RBPJ,RELA,RUNX2,SMAD1,SMAD3,Smac  
 ATF2,Ap1,CEBPB,EGR1,FOS,IL6,JUN,JUND,NFKB1,NFKBIA,NFkB (complex),NR3C1,P38 MAPK,RELA,SP1,STAT1,STAT

ATF2,FOS,JUN,MTPN,NFKB1,NFKBIA,NFkB (complex),REL,RELA,SP1,STAT3

Ap1,CEBPB,CREBBP,EP300,IRF1,JUN,NFKB1,NFKBIA,NFkB (complex),NR3C1,PTGS2,RELA,RELB,STAT1,STAT3,TNF,TF

Ap1,CEBPB,ESR1,FOS,IFNG,IL10,IL1B,IL6,IRF3,Interferon alpha,JUN,NFKB1,NFKBIA,NFkB (complex),NR3C1,RELA,SP  
 IKKBK,JUN,NFKB1,NFKB2,NFKBIA,NFkB (complex),REL,RELA,RELB,SP1,STAT1,STAT3,TP53  
 Ap1,CTNNB1,ESR2,FOS,IL2,JUN,NFKB1,NFKBIA,NFkB (complex),NR3C1,PLAU,RELA,SP1,STAT1,STAT3,STAT4,TAC1  
 AHR,ARNT,Akt,Ap1,CTNNB1,EP300,EPAS1,ESR1,HIF1A,JUN,NFKBIA,NFkB (complex),NOTCH1,NR3C1,RELA,RUNX2,S  
 Ap1,EGFR,EP300,EPAS1,ESR1,JUN,MAX,MYC,NFKBIA,NFkB (complex),NOTCH1,NR1H3,PPARA,PPARD,PPARG,RNA p  
 ESR1,IL6,JUN,NFKB1,NFKB2,NFKBIA,NFkB (complex),NR3C1,REL,RELA,RELB,SP1,STAT1,STAT3,TNF,TP53

ptor  
STAT3,USF1,cholesterol

iol

ise II,RXRA,Rxr,SP1,SRC,SREBF1,STAT3,THRA,THRB

CE,Pdgf (complex),RELA,RELB,RXRA,SP1,SREBF1,STAT1,THRA,TP53

amily),ZFP36  
SMAD3,SMAD4,SMAD7,SP1,STAT6,TP53  
RELA,RXRA,SP1,SREBF1,SREBF2,cholesterol,gemfibrozil  
STAT3,Smad,VHL

RELA,SP1,SREBF1,SREBF2,STAT3,cholesterol,fatty acid,palmitic acid  
SREBF1,SREBF2,STAT3,cholesterol,gemfibrozil

RELA,SP1,STAT1,STAT3,Vegf  
A  
STAT3,TGFB1,TP53  
erase II,SP1,STAT1,STAT3,TP53  
P1,STAT1,STAT3,TP53  
RNA polymerase II,SP1,TP53

RELA,SMAD1,STAT1,STAT3,TP53

),P38 MAPK,PPARG,RB1,RELA,SP1,STAT3,TGIF1,TP53

7,SP1,Smad,TGFB1,TP53,Tgf beta  
STAT1,STAT3,TP53

4,STAT6,TP53

erases II,STAT1,STAT3,TP53

MAD4,SP1,TNF,TP53

TP53

SP1,SREBF1,STAT1,STAT3,TP53

STAT3,TP53

ILB,STAT3,TP53

IL1,TP53

IL3,TNF,TP53

TP53

IL1,STAT1,STAT3

IL1,MAD4,SP1,STAT1,TCF,TCF4,TNF,TP53,VHL

polymerase II,SP1,SREBF1,STAT3,TP53,VHL,fatty acid, sphingosine-1-phosphate

Table S2

| Cell line | gene_name | Chrom | left      | right     | ref_seq | var_type | zygosity | var_seq1 |
|-----------|-----------|-------|-----------|-----------|---------|----------|----------|----------|
| A375      | HRAS      | 11    | 528944    | 528945    | g       | SNP      | Het      | t        |
| A375      | HRAS      | 11    | 532689    | 532690    | g       | SNP      | Het      | t        |
| A375      | HRAS      | 11    | 532689    | 532690    | g       | SNP      | Het      | t        |
| A375      | HRAS      | 11    | 532774    | 532775    | g       | SNP      | Het      | a        |
| A375      | HRAS      | 11    | 533310    | 533311    | g       | SNP      | Het      | a        |
| A375      | HRAS      | 11    | 533310    | 533311    | g       | SNP      | Het      | a        |
| A375      | HRAS      | 11    | 534477    | 534478    | t       | SNP      | Het      | a        |
| A375      | KRAS      | 12    | 25362552  | 25362553  | a       | SNP      | Hom      | c        |
| A375R     | KRAS      | 12    | 25368462  | 25368463  | c       | SNP      | Hom      | t        |
| A375      | KRAS      | 12    | 25368462  | 25368463  | c       | SNP      | Hom      | t        |
| A375      | KRAS      | 12    | 25368462  | 25368463  | c       | SNP      | Hom      | t        |
| A375      | KRAS      | 12    | 25368604  | 25368607  | ttt     | DEL      | Het      | ttt      |
| A375      | NRAS      | 1     | 115256343 | 115256344 | t       | SNP      | Het      | c        |
| A375      | NRAS      | 1     | 115258824 | 115258828 | aatt    | MNP      | Het      | aatg     |
| A375R     | NRAS      | 1     | 115258830 | 115258831 | c       | SNP      | Het      | g        |
| A375      | NRAS      | 1     | 115258830 | 115258831 | c       | SNP      | Het      | g        |
| A375      | NRAS      | 1     | 115258891 | 115258892 | g       | SNP      | Het      | a        |
| A375R     | BRAF      | 7     | 140434272 | 140434273 | a       | SNP      | Het      | c        |
| A375R     | BRAF      | 7     | 140434585 | 140434586 | a       | DEL      | Het      |          |
| A375      | BRAF      | 7     | 140434585 | 140434586 | a       | DEL      | Het      |          |
| A375      | BRAF      | 7     | 140434586 | 140434587 | g       | SNP      | Het      | a        |
| A375      | BRAF      | 7     | 140434596 | 140434597 | a       | SNP      | Het      | g        |
| A375      | BRAF      | 7     | 140434597 | 140434598 | g       | SNP      | Het      | a        |
| A375      | BRAF      | 7     | 140439596 | 140439597 | t       | SNP      | Het      | c        |
| A375R     | BRAF      | 7     | 140453136 | 140453137 | a       | SNP      | Hom      | t        |
| A375      | BRAF      | 7     | 140453136 | 140453137 | a       | SNP      | Hom      | t        |
| A375      | BRAF      | 7     | 140500033 | 140500034 | g       | SNP      | Het      | c        |
| A375      | BRAF      | 7     | 140501492 | 140501493 | c       | SNP      | Het      | a        |
| A375      | BRAF      | 7     | 140578018 | 140578019 | g       | SNP      | Het      | a        |
| A375      | RAF1      | 3     | 12632652  | 12632653  | g       | SNP      | Het      | c        |
| A375      | RAF1      | 3     | 12641374  | 12641375  | c       | SNP      | Het      | t        |
| A375      | RAF1      | 3     | 12641518  | 12641519  | a       | SNP      | Het      | g        |
| A375      | RAF1      | 3     | 12647548  | 12647548  |         | INS      | Het      | g        |
| A375      | RAF1      | 3     | 12650336  | 12650337  | g       | SNP      | Het      | t        |
| A375      | RAF1      | 3     | 12650482  | 12650483  | t       | SNP      | Hom      | a        |
| A375R     | RAF1      | 3     | 12650906  | 12650907  | c       | SNP      | Het      | t        |
| A375R     | RAF1      | 3     | 12660291  | 12660292  | c       | SNP      | Het      | t        |
| A375      | RAF1      | 3     | 12660291  | 12660292  | c       | SNP      | Het      | t        |
| A375      | RAF1      | 3     | 12697498  | 12697499  | g       | SNP      | Hom      | a        |
| A375      | MAP2K1    | 15    | 66670980  | 66670981  | t       | SNP      | Hom      | c        |
| A375      | MAP2K1    | 15    | 66671005  | 66671005  |         | INS      | Het      | a        |
| A375      | MAP2K1    | 15    | 66671767  | 66671769  | gc      | MNP      | Het      | tt       |



|       |        |    |          |          |   |     |     |   |
|-------|--------|----|----------|----------|---|-----|-----|---|
| A375  | MAP2K1 | 15 | 66671858 | 66671859 | a | SNP | Het | g |
| A375  | MAP2K1 | 15 | 66672021 | 66672022 | t | SNP | Hom | c |
| A375R | MAP2K1 | 15 | 66676552 | 66676553 | g | SNP | Hom | c |
| A375  | MAP2K1 | 15 | 66707371 | 66707372 | c | SNP | Het | t |
| A375R | MAP2K1 | 15 | 66727597 | 66727598 | g | SNP | Hom | c |
| A375  | MAP2K1 | 15 | 66727597 | 66727598 | g | SNP | Hom | c |
| A375R | MAP2K1 | 15 | 66735444 | 66735445 | g | SNP | Het | t |
| A375R | MAP2K1 | 15 | 66735551 | 66735552 | c | SNP | Hom | t |
| A375  | MAP2K1 | 15 | 66735551 | 66735552 | c | SNP | Hom | t |
| A375  | MAP2K1 | 15 | 66756925 | 66756926 | t | SNP | Hom | c |
| A375R | MAP2K1 | 15 | 66769587 | 66769588 | a | SNP | Hom | g |
|       |        |    |          |          |   |     |     |   |
| A375R | MAP2K2 | 19 | 4097227  | 4097228  | g | SNP | Het | a |
| A375  | MAP2K2 | 19 | 4097440  | 4097441  | c | SNP | Het | t |
| A375  | MAP2K2 | 19 | 4099187  | 4099188  | t | SNP | Hom | c |
| A375  | MAP2K2 | 19 | 4099295  | 4099296  | g | SNP | Het | a |
| A375R | MAP2K2 | 19 | 4101062  | 4101063  | g | SNP | Hom | t |
| A375  | MAP2K2 | 19 | 4101062  | 4101063  | g | SNP | Hom | t |
| A375  | MAP2K2 | 19 | 4102202  | 4102203  | g | SNP | Het | t |
| A375  | MAP2K2 | 19 | 4110408  | 4110409  | t | SNP | Het | c |
| A375R | MAP2K2 | 19 | 4110651  | 4110652  | c | SNP | Het | t |
| A375  | MAP2K2 | 19 | 4110721  | 4110722  | t | SNP | Het | c |
| A375R | MAP2K2 | 19 | 4117705  | 4117706  | t | SNP | Hom | c |
| A375  | MAP2K2 | 19 | 4117705  | 4117706  | t | SNP | Hom | c |
| A375  | MAP2K2 | 19 | 4123759  | 4123760  | c | SNP | Het | t |

| var_seq2 | var_score | not_ref_score | coverage   | read_count | read_count2 | where_in_transcript |
|----------|-----------|---------------|------------|------------|-------------|---------------------|
| g        | 35        | 35            | 7          | 4          |             | 3 Downstream        |
| g        | 35        | 35            | 11         | 5          |             | 6 CDS               |
| g        | 35        | 35            | 11         | 5          |             | 6 3'                |
| g        | 24.0256   | 24.02560043   | 11         | 2          |             | 8 Intron            |
| g        | 21.4324   | 21.43239975   | 8          | 2          |             | 6 CDS               |
| g        | 21.4324   | 21.43239975   | 8          | 2          |             | 6 Intron            |
| t        | 35        | 35            | 9          | 3          |             | 6 Intron            |
| c        | 12.2689   | 35            | 4          | 4          |             | 4 3'                |
| t        | 35        | 35            | 63         | 61         |             | 61 CDS              |
| t        | 35        | 35            | 75         | 74         |             | 74 CDS              |
| t        | 35        | 35            | 75         | 74         |             | 74 Intron           |
|          | 35        | 35            | 29         | 3          |             | 18 Intron           |
| t        | 8.59181   | 8.59181023    | 8          | 2          |             | 6 Intron            |
| aatt     | 11.8907   | 12.14830017   | 46         | 3          |             | 18 Intron           |
| c        | 20.968    | 20.96800041   | 12         | 5          |             | 6 Intron            |
| c        | 35        | 35            | 49         | 31         |             | 16 Intron           |
| g        | 34.8506   | 34.8506012    | 31         | 4          |             | 27 Intron           |
| a        | 34.9708   | 34.97079849   | 5          | 2          |             | 3 3' UTR            |
| a        | 15.9888   | 34.99229813   | 13         | 3          |             | 8 Intron            |
| a        | 3.01104   | 7.15592003    | 15         | 2          |             | 11 Intron           |
| g        | 35        | 35            | 14         | 4          |             | 10 Intron           |
| a        | 18.9926   | 18.99259949   | 10         | 2          |             | 7 Intron            |
| g        | 15.5692   | 15.56919956   | 10         | 2          |             | 8 Intron            |
| t        | 3.35107   | 3.35106993    | 40         | 4          |             | 36 Intron           |
| t        | 35        | 35            | 58         | 58         |             | 58 CDS              |
| t        | 35        | 35            | 35         | 35         |             | 35 CDS              |
| g        | 4.74138   | 4.74138021    | 15         | 2          |             | 13 Intron           |
| c        | 35        | 35            | 5          | 2          |             | 3 Intron            |
| g        | 33.9057   | 33.99140167   | 4          | 2          |             | 2 Intron            |
| g        | 35        | 35            | 15         | 10         |             | 5 Intron            |
| c        | 7.42225   | 7.42224979    | 13         | 2          |             | 11 Intron           |
| a        | 35        | 35            | 16         | 9          |             | 7 Intron            |
|          | 6.02743   | 35            | 10         | 8          |             | 2 Intron            |
| g        | 35        | 35            | 43         | 12         |             | 31 CDS              |
| a        | 35        | 35            | 12         | 12         |             | 12 Intron           |
| c        | 10.3303   | 10.33030033   | 12         | 2          |             | 10 Intron           |
| c        | 35        | 35            | 18         | 3          |             | 15 Intron           |
| c        | 35        | 35            | 19         | 7          |             | 12 Intron           |
| a        | 12.2679   | 35            | 4          | 4          |             | 4 Intron            |
| c        | 12.2528   | 35            | 4          | 4          |             | 4 Upstream          |
|          |           | 4.27212       | 4.31488991 | 4          |             | 2 Upstream          |
| gc       | 27.9542   | 35            | 42         | 7          |             | 33 Upstream         |

|   |         |             |    |    |             |
|---|---------|-------------|----|----|-------------|
| a | 35      | 35          | 32 | 5  | 27 Upstream |
| c | 35      | 35          | 16 | 15 | 15 Upstream |
| c | 12.26   | 35          | 4  | 4  | 4 Upstream  |
| c | 35      | 35          | 22 | 4  | 18 Intron   |
| c | 33.0712 | 35          | 11 | 11 | 11 Intron   |
| c | 35      | 35          | 30 | 30 | 30 Intron   |
| g | 4.76011 | 4.76556015  | 4  | 2  | 2 Intron    |
| t | 35      | 35          | 16 | 16 | 16 Intron   |
| t | 35      | 35          | 19 | 19 | 19 Intron   |
| c | 9.49379 | 35          | 4  | 4  | 4 Intron    |
| g | 12.2672 | 35          | 4  | 4  | 4 Intron    |
| g | 35      | 35          | 9  | 5  | 4 Intron    |
| c | 34.8937 | 34.89369965 | 19 | 3  | 15 Intron   |
| c | 23.8354 | 35          | 8  | 8  | 8 Intron    |
| g | 13.1718 | 13.17179966 | 11 | 2  | 9 CDS       |
| t | 35      | 35          | 22 | 22 | 22 CDS      |
| t | 35      | 35          | 40 | 40 | 40 CDS      |
| g | 29.9598 | 29.95980072 | 7  | 2  | 5 Intron    |
| t | 35      | 35          | 9  | 3  | 6 Intron    |
| c | 35      | 35          | 22 | 4  | 18 CDS      |
| t | 35      | 35          | 26 | 8  | 18 Intron   |
| c | 18.0877 | 35          | 7  | 7  | 7 Intron    |
| c | 35      | 35          | 17 | 17 | 17 Intron   |
| c | 35      | 35          | 14 | 3  | 11 Intron   |

| change_type1                 | ref_peptide1 | var_peptide1 | dbSNP                |
|------------------------------|--------------|--------------|----------------------|
| Non-Synonymous<br>Non-Coding | P            | T            |                      |
| Non-Synonymous               | P            | S            |                      |
| Non-Coding                   | Non-Coding   |              | rs712                |
| Synonymous                   | R            | R            | rs4362222            |
| Synonymous                   | R            | R            | rs4362222            |
|                              |              |              | rs4362222            |
| Non-Coding                   |              |              |                      |
| Non-Synonymous               | V            | E            |                      |
| Non-Synonymous               | V            | E            |                      |
| Stop Gain                    | Y            | *            | rs2596831            |
|                              |              |              | rs2246390            |
|                              |              |              | rs3214791            |
|                              |              |              | rs2454440            |
|                              |              |              | rs3729926;rs67158094 |
|                              |              |              | rs3729926;rs67158094 |
|                              |              |              | rs4684871            |

rs55652624

rs16949924  
rs16949924

rs6494573  
rs6494573  
rs56330720

|            |   |   |
|------------|---|---|
| Synonymous | L | L |
| Synonymous | I | I |
| Synonymous | I | I |

rs350911

rs10250;rs11539507  
rs10250;rs11539507

|            |   |   |
|------------|---|---|
| Synonymous | L | L |
|------------|---|---|

rs12975436

rs350890  
rs350890

| Cell line | gene_name | chrom | left      | right     | ref_seq | var_type | zygosity | var_seq1 |
|-----------|-----------|-------|-----------|-----------|---------|----------|----------|----------|
| SK-mel28R | NRAS      | 1     | 115251475 | 115251476 | g       | SNP      | Het      | a        |
| SKmel-28  | NRAS      | 1     | 115256669 | 115256670 | g       | SNP      | Hom      | a        |
| SK-mel28R | NRAS      | 1     | 115256669 | 115256670 | g       | SNP      | Hom      | a        |
| SK-mel28R | HRAS      | 11    | 527311    | 527312    | t       | SNP      | Het      | g        |
| SKmel-28  | HRAS      | 11    | 534242    | 534243    | a       | SNP      | Het      | g        |
| SK-mel28R | HRAS      | 11    | 534242    | 534243    | a       | SNP      | Het      | g        |
| SKmel-28  | HRAS      | 11    | 534407    | 534409    | ag      | MNP      | Het      | ct       |
| SKmel-28  | HRAS      | 11    | 534411    | 534412    | c       | SNP      | Het      | t        |
| SKmel-28  | BRAF      | 7     | 140449071 | 140449072 | c       | SNP      | Hom      | g        |
| SK-mel28R | BRAF      | 7     | 140449071 | 140449072 | c       | SNP      | Hom      | g        |
| SKmel-28  | BRAF      | 7     | 140449150 | 140449151 | t       | SNP      | Hom      | c        |
| SK-mel28R | BRAF      | 7     | 140449150 | 140449151 | t       | SNP      | Hom      | c        |
| SK-mel28R | BRAF      | 7     | 140449834 | 140449835 | c       | SNP      | Hom      | t        |
| SKmel-28  | BRAF      | 7     | 140453136 | 140453137 | a       | SNP      | Hom      | t        |
| SK-mel28R | BRAF      | 7     | 140453136 | 140453137 | a       | SNP      | Hom      | t        |
| SK-mel28R | BRAF      | 7     | 140460160 | 140460161 | c       | SNP      | Het      | t        |
| SK-mel28R | BRAF      | 7     | 140460169 | 140460170 | t       | SNP      | Hom      | c        |
| SKmel-28  | BRAF      | 7     | 140476936 | 140476937 | g       | SNP      | Hom      | a        |
| SK-mel28R | BRAF      | 7     | 140476936 | 140476937 | g       | SNP      | Hom      | a        |
| SKmel-28  | BRAF      | 7     | 140487202 | 140487203 | c       | SNP      | Hom      | t        |
| SK-mel28R | BRAF      | 7     | 140487202 | 140487203 | c       | SNP      | Hom      | t        |
| SKmel-28  | BRAF      | 7     | 140500135 | 140500136 | c       | SNP      | Hom      | t        |
| SK-mel28R | BRAF      | 7     | 140500135 | 140500136 | c       | SNP      | Hom      | t        |
| SKmel-28  | BRAF      | 7     | 140507937 | 140507938 | a       | SNP      | Hom      | t        |
| SK-mel28R | BRAF      | 7     | 140507937 | 140507938 | a       | SNP      | Hom      | t        |
| SK-mel28R | BRAF      | 7     | 140534267 | 140534268 | c       | SNP      | Hom      | t        |
| SK-mel28R | RAF1      | 3     | 12629886  | 12629887  | a       | SNP      | Hom      | g        |
| SK-mel28R | RAF1      | 3     | 12632652  | 12632653  | g       | SNP      | Hom      | c        |
| SKmel-28  | RAF1      | 3     | 12641518  | 12641519  | a       | SNP      | Hom      | g        |
| SK-mel28R | RAF1      | 3     | 12641518  | 12641519  | a       | SNP      | Hom      | g        |
| SKmel-28  | RAF1      | 3     | 12641937  | 12641938  | g       | SNP      | Het      | t        |
| SK-mel28R | RAF1      | 3     | 12641937  | 12641938  | g       | SNP      | Het      | t        |
| SK-mel28R | RAF1      | 3     | 12647548  | 12647548  |         | INS      | Hom      | g        |
| SKmel-28  | RAF1      | 3     | 12650482  | 12650483  | t       | SNP      | Hom      | a        |
| SK-mel28R | RAF1      | 3     | 12650482  | 12650483  | t       | SNP      | Hom      | a        |
| SK-mel28R | MAP2K1    | 15    | 66672021  | 66672022  | t       | SNP      | Het      | c        |
| SKmel-28  | MAP2K1    | 15    | 66679601  | 66679602  | g       | SNP      | Het      | c        |
| SK-mel28R | MAP2K1    | 15    | 66679601  | 66679602  | g       | SNP      | Het      | c        |
| SK-mel28R | MAP2K1    | 15    | 66687927  | 66687929  | tt      | DEL      | Het      |          |
| SKmel-28  | MAP2K1    | 15    | 66727597  | 66727598  | g       | SNP      | Het      | c        |
| SK-mel28R | MAP2K1    | 15    | 66727597  | 66727598  | g       | SNP      | Het      | c        |
| SKmel-28  | MAP2K1    | 15    | 66728951  | 66728952  | a       | SNP      | Het      | c        |
| SKmel-28  | MAP2K1    | 15    | 66735551  | 66735552  | c       | SNP      | Hom      | t        |

|           |        |    |          |          |   |     |     |   |
|-----------|--------|----|----------|----------|---|-----|-----|---|
| SK-mel28R | MAP2K1 | 15 | 66735551 | 66735552 | c | SNP | Hom | t |
| SK-mel28R | MAP2K1 | 15 | 66773975 | 66773976 | g | SNP | Het | a |
| SKmel-28  | MAP2K1 | 15 | 66782925 | 66782926 | g | SNP | Het | a |
| SK-mel28R | MAP2K2 | 19 | 4090572  | 4090573  | g | SNP | Hom | a |
| SKmel-28  | MAP2K2 | 19 | 4099187  | 4099188  | t | SNP | Hom | c |
| SK-mel28R | MAP2K2 | 19 | 4099187  | 4099188  | t | SNP | Hom | c |
| SKmel-28  | MAP2K2 | 19 | 4101062  | 4101063  | g | SNP | Het | t |
| SK-mel28R | MAP2K2 | 19 | 4101062  | 4101063  | g | SNP | Het | t |
| SKmel-28  | MAP2K2 | 19 | 4101499  | 4101500  | t | SNP | Het | a |
| SKmel-28  | MAP2K2 | 19 | 4110318  | 4110319  | g | SNP | Het | c |
| SKmel-28  | MAP2K2 | 19 | 4110408  | 4110409  | t | SNP | Het | c |
| SK-mel28R | MAP2K2 | 19 | 4110408  | 4110409  | t | SNP | Het | c |
| SKmel-28  | MAP2K2 | 19 | 4117705  | 4117706  | t | SNP | Hom | c |
| SK-mel28R | MAP2K2 | 19 | 4117705  | 4117706  | t | SNP | Hom | c |
| SKmel-28  | MAP2K2 | 19 | 4133404  | 4133405  | a | SNP | Hom | g |
| SK-mel28R | EGFR   | 7  | 55196855 | 55196856 | t | SNP | Hom | c |
| SKmel-28  | EGFR   | 7  | 55214348 | 55214349 | c | SNP | Hom | t |
| SKmel-28  | EGFR   | 7  | 55218903 | 55218904 | t | SNP | Hom | c |
| SK-mel28R | EGFR   | 7  | 55218903 | 55218904 | t | SNP | Hom | c |
| SKmel-28  | EGFR   | 7  | 55219159 | 55219160 | c | SNP | Hom | t |
| SK-mel28R | EGFR   | 7  | 55219159 | 55219160 | c | SNP | Hom | t |
| SKmel-28  | EGFR   | 7  | 55219290 | 55219291 | t | SNP | Hom | c |
| SK-mel28R | EGFR   | 7  | 55219290 | 55219291 | t | SNP | Hom | c |
| SK-mel28R | EGFR   | 7  | 55219307 | 55219308 | c | SNP | Hom | g |
| SK-mel28R | EGFR   | 7  | 55219611 | 55219612 | a | SNP | Hom | g |
| SKmel-28  | EGFR   | 7  | 55220177 | 55220178 | a | SNP | Hom | g |
| SK-mel28R | EGFR   | 7  | 55220177 | 55220178 | a | SNP | Hom | g |
| SK-mel28R | EGFR   | 7  | 55221447 | 55221448 | c | SNP | Hom | g |
| SK-mel28R | EGFR   | 7  | 55221469 | 55221470 | c | SNP | Hom | t |
| SK-mel28R | EGFR   | 7  | 55225170 | 55225171 | g | SNP | Hom | c |
| SKmel-28  | EGFR   | 7  | 55228053 | 55228054 | a | SNP | Hom | t |
| SK-mel28R | EGFR   | 7  | 55228053 | 55228054 | a | SNP | Hom | t |
| SKmel-28  | EGFR   | 7  | 55229186 | 55229187 | c | SNP | Het | g |
| SKmel-28  | EGFR   | 7  | 55229255 | 55229256 | g | SNP | Hom | a |
| SK-mel28R | EGFR   | 7  | 55229255 | 55229256 | g | SNP | Hom | a |
| SKmel-28  | EGFR   | 7  | 55238268 | 55238269 | g | SNP | Hom | a |
| SK-mel28R | EGFR   | 7  | 55238268 | 55238269 | g | SNP | Hom | a |
| SK-mel28R | EGFR   | 7  | 55238464 | 55238465 | t | SNP | Hom | g |
| SKmel-28  | EGFR   | 7  | 55238874 | 55238875 | t | SNP | Hom | a |
| SK-mel28R | EGFR   | 7  | 55238874 | 55238875 | t | SNP | Hom | a |
| SKmel-28  | EGFR   | 7  | 55242487 | 55242488 | c | SNP | Hom | t |
| SK-mel28R | EGFR   | 7  | 55242487 | 55242488 | c | SNP | Hom | t |
| SKmel-28  | EGFR   | 7  | 55242609 | 55242610 | a | SNP | Hom | g |
| SK-mel28R | EGFR   | 7  | 55242609 | 55242610 | a | SNP | Hom | g |
| SKmel-28  | EGFR   | 7  | 55242782 | 55242783 | t | SNP | Hom | c |
| SKmel-28  | EGFR   | 7  | 55248926 | 55248927 | t | SNP | Hom | c |

|           |      |   |          |          |   |     |     |    |
|-----------|------|---|----------|----------|---|-----|-----|----|
| SK-mel28R | EGFR | 7 | 55248926 | 55248927 | t | SNP | Hom | c  |
| SKmel-28  | EGFR | 7 | 55249063 | 55249064 | g | SNP | Hom | a  |
| SK-mel28R | EGFR | 7 | 55249063 | 55249064 | g | SNP | Hom | a  |
| SK-mel28R | EGFR | 7 | 55251962 | 55251963 | a | SNP | Hom | g  |
| SKmel-28  | EGFR | 7 | 55266417 | 55266418 | t | SNP | Hom | c  |
| SK-mel28R | EGFR | 7 | 55266417 | 55266418 | t | SNP | Hom | c  |
| SK-mel28R | EGFR | 7 | 55269676 | 55269676 |   | INS | Hom | ag |
| SKmel-28  | EGFR | 7 | 55272826 | 55272827 | g | SNP | Hom | a  |
| SK-mel28R | EGFR | 7 | 55272826 | 55272827 | g | SNP | Hom | a  |



| var_seq2 | var_score | not_ref_sc | coverage | read_count | read_count2 | where_in_transcript |
|----------|-----------|------------|----------|------------|-------------|---------------------|
| g        | 15.1061   | 15.1061    | 5        | 2          |             | 3 Intron            |
| a        | 21.0494   | 35         | 7        | 7          |             | 7 Intron            |
| a        | 24.0463   | 35         | 8        | 8          |             | 8 Intron            |
| t        | 35        | 35         | 6        | 4          |             | 2 Downstream        |
| a        | 35        | 35         | 60       | 12         |             | 48 CDS              |
| a        | 35        | 35         | 96       | 38         |             | 58 CDS              |
| ag       | 35        | 35         | 9        | 2          |             | 7 Intron            |
| c        | 17.0531   | 17.0531    | 7        | 2          |             | 5 Intron            |
| g        | 35        | 35         | 20       | 20         |             | 20 Intron           |
| g        | 35        | 35         | 41       | 40         |             | 40 Intron           |
| c        | 35        | 35         | 43       | 43         |             | 43 CDS              |
| c        | 35        | 35         | 49       | 48         |             | 48 CDS              |
| t        | 12.2632   | 35         | 4        | 4          |             | 4 Intron            |
| t        | 35        | 35         | 26       | 26         |             | 26 CDS              |
| t        | 35        | 35         | 27       | 26         |             | 26 CDS              |
| c        | 11.312    | 11.312     | 4        | 2          |             | 2 Intron            |
| c        | 12.2283   | 35         | 4        | 4          |             | 4 Intron            |
| a        | 12.2658   | 35         | 4        | 4          |             | 4 Intron            |
| a        | 30.0649   | 35         | 10       | 10         |             | 10 Intron           |
| t        | 15.1462   | 35         | 5        | 5          |             | 5 Intron            |
| t        | 30.0636   | 35         | 10       | 10         |             | 10 Intron           |
| t        | 33.0376   | 35         | 11       | 11         |             | 11 Intron           |
| t        | 35        | 35         | 27       | 27         |             | 27 Intron           |
| t        | 35        | 35         | 20       | 20         |             | 20 Intron           |
| t        | 35        | 35         | 30       | 30         |             | 30 Intron           |
| t        | 30.0612   | 35         | 10       | 10         |             | 10 Intron           |
| g        | 14.9755   | 35         | 5        | 5          |             | 5 Intron            |
| c        | 12.2686   | 35         | 4        | 4          |             | 4 Intron            |
| g        | 26.9395   | 35         | 9        | 9          |             | 9 Intron            |
| g        | 35        | 35         | 17       | 16         |             | 16 Intron           |
| g        | 35        | 35         | 22       | 11         |             | 11 Intron           |
| g        | 35        | 35         | 28       | 13         |             | 15 Intron           |
| g        | 11.9395   | 35         | 4        | 4          |             | 4 Intron            |
| a        | 21.0556   | 35         | 7        | 7          |             | 7 Intron            |
| a        | 24.0461   | 35         | 8        | 8          |             | 8 Intron            |
| t        | 28.9477   | 35         | 10       | 8          |             | 2 Upstream          |
| g        | 25.9952   | 25.9952    | 5        | 2          |             | 3 5' UTR            |
| g        | 35        | 35         | 9        | 6          |             | 3 5' UTR            |
| tt       | 4.87558   | 4.91015    | 4        | 2          |             | 2 Intron            |
| g        | 35        | 35         | 11       | 6          |             | 5 Intron            |
| g        | 30.7356   | 35         | 15       | 13         |             | 2 Intron            |
| a        | 31.9525   | 31.9525    | 7        | 2          |             | 5 Intron            |
| t        | 14.9309   | 35         | 6        | 6          |             | 6 Intron            |

|   |         |         |    |    |            |
|---|---------|---------|----|----|------------|
| t | 27.0597 | 35      | 9  | 9  | 9 Intron   |
| g | 35      | 35      | 10 | 3  | 7 Intron   |
| g | 3.62378 | 3.62378 | 11 | 2  | 9 CDS      |
| a | 15.1448 | 35      | 5  | 5  | 5 3' UTR   |
| c | 35      | 35      | 15 | 15 | 15 Intron  |
| c | 33.0553 | 35      | 12 | 12 | 12 Intron  |
| g | 35      | 35      | 31 | 19 | 12 CDS     |
| g | 35      | 35      | 47 | 7  | 40 CDS     |
| t | 32.5    | 33.017  | 4  | 2  | 2 Intron   |
| g | 22.0112 | 22.0284 | 4  | 2  | 2 Intron   |
| t | 35      | 35      | 12 | 7  | 5 Intron   |
| t | 4.74374 | 35      | 13 | 11 | 2 Intron   |
| c | 18.0902 | 35      | 7  | 6  | 6 Intron   |
| c | 12.268  | 35      | 4  | 4  | 4 Intron   |
| g | 9.47087 | 35      | 4  | 4  | 4 Upstream |
| c | 12.2683 | 35      | 4  | 4  | 4 Intron   |
| t | 35      | 35      | 23 | 23 | 23 CDS     |
| c | 35      | 35      | 14 | 14 | 14 Intron  |
| c | 35      | 35      | 13 | 13 | 13 Intron  |
| t | 30.0616 | 35      | 10 | 10 | 10 Intron  |
| t | 35      | 35      | 22 | 22 | 22 Intron  |
| c | 10.7337 | 35      | 4  | 4  | 4 Intron   |
| c | 15.1469 | 35      | 5  | 5  | 5 Intron   |
| g | 9.50808 | 35      | 4  | 4  | 4 Intron   |
| g | 15.1374 | 35      | 6  | 5  | 5 Intron   |
| g | 24.0526 | 35      | 8  | 8  | 8 Intron   |
| g | 33.0417 | 35      | 11 | 11 | 11 Intron  |
| g | 15.1471 | 35      | 5  | 5  | 5 Intron   |
| t | 18.0909 | 35      | 6  | 6  | 6 Intron   |
| c | 14.7956 | 35      | 5  | 5  | 5 Intron   |
| t | 12.2682 | 35      | 4  | 4  | 4 Intron   |
| t | 30.0645 | 35      | 10 | 10 | 10 Intron  |
| c | 4.6926  | 4.6926  | 15 | 2  | 13 Intron  |
| a | 35      | 35      | 33 | 33 | 33 CDS     |
| a | 35      | 35      | 37 | 37 | 37 CDS     |
| a | 35      | 35      | 23 | 22 | 22 Intron  |
| a | 35      | 35      | 27 | 26 | 26 Intron  |
| g | 12.2545 | 35      | 4  | 4  | 4 Intron   |
| a | 35      | 35      | 27 | 27 | 27 CDS     |
| a | 35      | 35      | 29 | 29 | 29 CDS     |
| t | 35      | 35      | 22 | 22 | 22 CDS     |
| t | 35      | 35      | 29 | 29 | 29 CDS     |
| g | 24.0517 | 35      | 9  | 9  | 9 Intron   |
| g | 33.0623 | 35      | 11 | 11 | 11 Intron  |
| c | 15.1463 | 35      | 5  | 5  | 5 Intron   |
| c | 24.0333 | 35      | 9  | 8  | 8 Intron   |

|    |         |    |    |    |          |
|----|---------|----|----|----|----------|
| c  | 27.0399 | 35 | 9  | 9  | 9 Intron |
| a  | 35      | 35 | 21 | 21 | 21 CDS   |
| a  | 35      | 35 | 21 | 21 | 21 CDS   |
| g  | 9.50067 | 35 | 4  | 4  | 4 Intron |
| c  | 35      | 35 | 49 | 48 | 48 CDS   |
| c  | 35      | 35 | 41 | 41 | 41 CDS   |
| ag | 14.8085 | 35 | 6  | 5  | 5 Intron |
| a  | 12.2565 | 35 | 4  | 4  | 4 Intron |
| a  | 21.0652 | 35 | 8  | 8  | 8 Intron |

| change_type1 | ref_peptide1 | var_peptide1 |
|--------------|--------------|--------------|
|--------------|--------------|--------------|

|            |   |   |
|------------|---|---|
| Synonymous | H | H |
| Synonymous | H | H |

|            |   |   |            |   |   |
|------------|---|---|------------|---|---|
| Synonymous | G | G | Synonymous | G | G |
| Synonymous | G | G | Synonymous | G | G |

|                |   |   |                |   |   |
|----------------|---|---|----------------|---|---|
| Non-Synonymous | V | E | Non-Synonymous | V | E |
| Non-Synonymous | V | E | Non-Synonymous | V | E |

Non-Coding  
Non-Coding

Non-Synonymous S N  
Non-Coding

Non-Coding

Synonymous I I  
Synonymous I I

Synonymous N N

Synonymous N N

Non-Synonymous R K  
Non-Synonymous R K

Non-Synonymous R K  
Non-Synonymous R K

Synonymous T T  
Synonymous T T  
Non-Synonymous P S  
Non-Synonymous P S

Synonymous T T  
Synonymous T T  
Non-Synonymous P S  
Non-Synonymous P S

|            |   |   |            |   |   |
|------------|---|---|------------|---|---|
| Synonymous | Q | Q | Synonymous | Q | Q |
| Synonymous | Q | Q | Synonymous | Q | Q |
| Synonymous | T | T | Synonymous | T | T |
| Synonymous | T | T | Synonymous | T | T |

**dbSNP**

rs61758221  
rs969273  
rs969273  
rs117011293  
rs12628  
rs12628

rs3789806  
rs3789806  
rs9648696  
rs9648696  
rs10282499  
rs113488022  
rs113488022

rs11769042  
rs62487918  
rs62487918  
rs1267632  
rs1267632  
rs41282721  
rs41282721  
rs17695935  
rs17695935  
rs1267623

rs2454436  
rs2596831  
rs2246390  
rs2246390

rs3214791  
rs2454440  
rs2454440

rs55652624  
rs112542693  
rs112542693

rs16949924  
rs16949924  
rs11637556  
rs6494573

rs6494573  
rs41277720

rs6629  
rs350911  
rs350911  
rs10250;rs11539507  
rs10250;rs11539507

rs12981086  
rs12975436  
rs12975436  
rs350890;rs113866832  
rs350890;rs113866832  
rs8104243

rs6593207  
rs2072454  
rs2075109  
rs2075109  
rs2075110  
rs2075110  
rs6944695  
rs6944695  
rs2075111  
rs2075112  
rs11506105  
rs11506105  
rs12718946  
rs11770689  
rs4947987  
rs1558544  
rs1558544

rs2227983  
rs2227983  
rs10228436  
rs10228436  
rs10277413  
rs17337023  
rs17337023

rs2017000  
rs2017000  
rs712831  
rs10241451



rs10241451  
rs1050171  
rs1050171  
rs6965663  
rs1140475  
rs1140475  
rs34723095  
rs2692456  
rs2692456
